# Supplementary material
Source: PubMed Central journal article supplement (PMC4640774)

**Table S7.3. Candidate female-specific gene expression.**

| GeneID      | Gene_length | Male reads | Female reads | Male-RPKM | Female-RPKM | log2 Ratio(F/M) | Up-Down-Regulation(F/M) | P-value  | FDR      | Description                                                        |
|-------------|-------------|------------|--------------|-----------|-------------|-----------------|-------------------------|----------|----------|--------------------------------------------------------------------|
| CCG003364.1 | 2292        | 0          | 29097        | 0.001     | 443.7962388 | 18.75953791     | Up                      | 4.44E-16 | 1.66E-15 | AAEL004401-PA (Fragment) OS=Aedes aegypti GN=HPX7 PE=4 SV=2        |
| CCG015183.1 | 309         | 0          | 2985         | 0.001     | 337.7037416 | 18.36539864     | Up                      | 4.44E-16 | 1.65E-15 | -                                                                  |
| CCG016476.1 | 543         | 0          | 5157         | 0.001     | 332.0070595 | 18.34085439     | Up                      | 4.44E-16 | 1.63E-15 | AAEL013262-PA OS=Aedes aegypti GN=AAEL013262 PE=4 SV=1             |
| CCG004868.1 | 5466        | 0          | 32075        | 0.001     | 205.1384426 | 17.64623835     | Up                      | 4.44E-16 | 1.65E-15 | AAEL007657-PA OS=Aedes aegypti GN=AAEL007657 PE=4 SV=1             |
| CCG019309.1 | 1548        | 0          | 7889         | 0.001     | 178.1562309 | 17.44278342     | Up                      | 4.44E-16 | 1.65E-15 | AAEL013703-PA (Fragment) OS=Aedes aegypti GN=AAEL013703 PE=3 SV=1  |
| CCG021499.1 | 633         | 0          | 3183         | 0.001     | 175.7854581 | 17.4234562      | Up                      | 4.44E-16 | 1.63E-15 | 30 kDa salivary gland allergen 30k-2 OS=Aedes albopictus PE=2 SV=1 |
| CCG027373.1 | 761         | 0          | 3413         | 0.001     | 156.7839667 | 17.25841851     | Up                      | 4.44E-16 | 1.64E-15 | -                                                                  |
| CCG021490.1 | 354         | 0          | 932          | 0.001     | 92.03704506 | 16.48992704     | Up                      | 4.44E-16 | 1.64E-15 | AAEL010229-PA OS=Aedes aegypti GN=AAEL010229 PE=4 SV=1             |
| CCG007095.1 | 264         | 0          | 663          | 0.001     | 87.79294508 | 16.42181739     | Up                      | 4.44E-16 | 1.65E-15 | -                                                                  |
| CCG006421.1 | 1212        | 0          | 2706         | 0.001     | 78.05041002 | 16.25211859     | Up                      | 4.44E-16 | 1.65E-15 | AAEL004172-PA OS=Aedes aegypti GN=AAEL004172 PE=3 SV=1             |
| CCG000612.1 | 741         | 0          | 1545         | 0.001     | 72.88871473 | 16.15340784     | Up                      | 4.44E-16 | 1.65E-15 | AAEL001559-PA OS=Aedes aegypti GN=AAEL001559 PE=3 SV=1             |
| CCG008523.1 | 6612        | 0          | 13020        | 0.001     | 68.83798602 | 16.07091727     | Up                      | 4.44E-16 | 1.65E-15 | AAEL008829-PA OS=Aedes aegypti GN=AAEL008829 PE=4 SV=1             |
| CCG015620.1 | 744         | 0          | 1246         | 0.001     | 58.54571621 | 15.83727599     | Up                      | 4.44E-16 | 1.65E-15 | AAEL007855-PA OS=Aedes aegypti GN=AAEL007855 PE=4 SV=1             |
| CCG012584.1 | 256         | 0          | 428          | 0.001     | 58.44586898 | 15.83481344     | Up                      | 4.44E-16 | 1.65E-15 | Histone H2B OS=Ixodes scapularis GN=IscW_ISCW019496 PE=2 SV=1      |
| CCG009221.1 | 2197        | 0          | 3576         | 0.001     | 56.90068172 | 15.79615832     | Up                      | 4.44E-16 | 1.64E-15 | AAEL002671-PA OS=Aedes aegypti GN=AAEL002671 PE=4 SV=1             |
| CCG000945.1 | 645         | 0          | 1022         | 0.001     | 55.39125405 | 15.75737058     | Up                      | 4.44E-16 | 1.66E-15 | AAEL008182-PA OS=Aedes aegypti GN=AAEL008182 PE=4 SV=1             |

|             |      |   |      |       |             |             |    |          |          |                                                                                                                                 |
|-------------|------|---|------|-------|-------------|-------------|----|----------|----------|---------------------------------------------------------------------------------------------------------------------------------|
| CCG011230.1 | 561  | 0 | 872  | 0.001 | 54.33799883 | 15.72967381 | Up | 4.44E-16 | 1.66E-15 | 5-hydroxyisourate hydrolase OS=Culex quinquefasciatus<br>GN=CpipJ_CPIJ014057 PE=3 SV=1                                          |
| CCG015513.1 | 542  | 0 | 837  | 0.001 | 53.98538313 | 15.72028122 | Up | 4.44E-16 | 1.64E-15 | -                                                                                                                               |
| CCG013230.1 | 481  | 0 | 698  | 0.001 | 50.7294744  | 15.63053659 | Up | 4.44E-16 | 1.63E-15 | -                                                                                                                               |
| CCG011210.1 | 897  | 0 | 1235 | 0.001 | 48.13096077 | 15.5546776  | Up | 4.44E-16 | 1.63E-15 | AAEL013295-PA OS=Aedes aegypti GN=AAEL013295 PE=4<br>SV=1                                                                       |
| CCG019307.1 | 975  | 0 | 1291 | 0.001 | 46.28834391 | 15.49836133 | Up | 4.44E-16 | 1.63E-15 | AAEL013715-PA OS=Aedes aegypti GN=AAEL013715 PE=3<br>SV=1                                                                       |
| CCG026123.1 | 402  | 0 | 517  | 0.001 | 44.95877883 | 15.45631523 | Up | 4.44E-16 | 1.63E-15 | AAEL013734-PA OS=Aedes aegypti GN=AAEL013734 PE=4<br>SV=1                                                                       |
| CCG008559.1 | 490  | 0 | 585  | 0.001 | 41.73590186 | 15.34900133 | Up | 4.44E-16 | 1.63E-15 | Predicted protein OS=Nematostella vectensis GN=v1g229551<br>PE=3 SV=1                                                           |
| CCG021498.1 | 234  | 0 | 272  | 0.001 | 40.63526189 | 15.31044457 | Up | 4.44E-16 | 1.65E-15 | Putative secreted protein (Precursor) OS=Aedes aegypti<br>GN=SGP1A2 PE=4 SV=1                                                   |
| CCG010483.1 | 954  | 0 | 1095 | 0.001 | 40.12506611 | 15.29221615 | Up | 4.44E-16 | 1.65E-15 | AAEL013300-PA OS=Aedes aegypti GN=AAEL013300 PE=4<br>SV=1                                                                       |
| CCG020758.1 | 738  | 0 | 817  | 0.001 | 38.70042293 | 15.24006171 | Up | 4.44E-16 | 1.65E-15 | Serine 3-dehydrogenase OS=Culex quinquefasciatus<br>GN=CpipJ_CPIJ016922 PE=3 SV=1                                               |
| CCG006000.1 | 641  | 0 | 669  | 0.001 | 36.48531538 | 15.1550283  | Up | 4.44E-16 | 1.65E-15 | -                                                                                                                               |
| CCG027682.1 | 579  | 0 | 556  | 0.001 | 33.56960602 | 15.03486798 | Up | 4.44E-16 | 1.65E-15 | AAEL008835-PA OS=Aedes aegypti GN=AAEL008835 PE=4<br>SV=1                                                                       |
| CCG025737.1 | 441  | 0 | 422  | 0.001 | 33.45213786 | 15.02981079 | Up | 4.44E-16 | 1.64E-15 | -                                                                                                                               |
| CCG027199.1 | 458  | 0 | 417  | 0.001 | 31.82882405 | 14.95804624 | Up | 4.44E-16 | 1.65E-15 | Histone H2A OS=Aedes aegypti GN=AAEL003669 PE=3 SV=1                                                                            |
| CCG010533.1 | 750  | 0 | 667  | 0.001 | 31.08956081 | 14.92414262 | Up | 4.44E-16 | 1.65E-15 | AAEL000499-PA OS=Aedes aegypti GN=SPZ1A PE=4 SV=1                                                                               |
| CCG006258.1 | 792  | 0 | 658  | 0.001 | 29.04361883 | 14.8259336  | Up | 4.44E-16 | 1.63E-15 | AAEL008580-PA OS=Aedes aegypti GN=AAEL008580 PE=4<br>SV=1                                                                       |
| CCG026473.1 | 394  | 0 | 320  | 0.001 | 28.39250905 | 14.79322273 | Up | 4.44E-16 | 1.66E-15 | Chromosome undetermined SCAF14565, whole genome shotgun<br>sequence OS=Tetraodon nigroviridis GN=GSTENG00016696001<br>PE=3 SV=1 |
| CCG023004.1 | 975  | 0 | 788  | 0.001 | 28.25345856 | 14.78613986 | Up | 4.44E-16 | 1.63E-15 | AAEL008137-PA OS=Aedes aegypti GN=AAEL008137 PE=4<br>SV=1                                                                       |
| CCG010905.1 | 442  | 0 | 353  | 0.001 | 27.91916674 | 14.76896826 | Up | 4.44E-16 | 1.64E-15 | Predicted protein OS=Nematostella vectensis GN=v1g229551<br>PE=3 SV=1                                                           |
| CCG019308.1 | 1023 | 0 | 774  | 0.001 | 26.4493707  | 14.69094578 | Up | 4.44E-16 | 1.63E-15 | AAEL013715-PA OS=Aedes aegypti GN=AAEL013715 PE=3<br>SV=1                                                                       |

|             |      |   |      |       |             |             |    |          |          |                                                                        |
|-------------|------|---|------|-------|-------------|-------------|----|----------|----------|------------------------------------------------------------------------|
| CCG001793.1 | 363  | 0 | 271  | 0.001 | 26.09832784 | 14.67166975 | Up | 4.44E-16 | 1.64E-15 | -                                                                      |
| CCG010137.1 | 477  | 0 | 354  | 0.001 | 25.94387836 | 14.66310654 | Up | 4.44E-16 | 1.64E-15 | Histone H2B OS=Aedes aegypti GN=AAEL015674 PE=3 SV=1                   |
| CCG027198.1 | 489  | 0 | 362  | 0.001 | 25.87913332 | 14.65950168 | Up | 4.44E-16 | 1.64E-15 | Predicted protein OS=Nematostella vectensis GN=v1g229551 PE=3 SV=1     |
| CCG006081.1 | 1572 | 0 | 1163 | 0.001 | 25.86289815 | 14.65859633 | Up | 4.44E-16 | 1.65E-15 | AAEL005916-PA OS=Aedes aegypti GN=AAEL005916 PE=4 SV=1                 |
| CCG004494.1 | 1047 | 0 | 773  | 0.001 | 25.8096924  | 14.65562533 | Up | 4.44E-16 | 1.64E-15 | AAEL007783-PA OS=Aedes aegypti GN=AAEL007783 PE=4 SV=1                 |
| CCG004157.1 | 354  | 0 | 255  | 0.001 | 25.18180954 | 14.62009434 | Up | 4.44E-16 | 1.63E-15 | -                                                                      |
| CCG010120.1 | 885  | 0 | 614  | 0.001 | 24.25353891 | 14.56590765 | Up | 4.44E-16 | 1.64E-15 | AAEL014276-PA OS=Aedes aegypti GN=AAEL014276 PE=4 SV=1                 |
| CCG010748.1 | 1692 | 0 | 1141 | 0.001 | 23.57410981 | 14.52491567 | Up | 4.44E-16 | 1.64E-15 | Putative salivary secreted protein 62k-2 OS=Aedes albopictus PE=2 SV=1 |
| CCG026452.1 | 450  | 0 | 295  | 0.001 | 22.91709255 | 14.4841364  | Up | 4.44E-16 | 1.64E-15 | AAEL003185-PA OS=Aedes aegypti GN=AAEL003185 PE=4 SV=1                 |
| CCG005597.1 | 261  | 0 | 170  | 0.001 | 22.76975882 | 14.47483139 | Up | 4.44E-16 | 1.66E-15 | -                                                                      |
| CCG010482.1 | 786  | 0 | 509  | 0.001 | 22.63837516 | 14.46648279 | Up | 4.44E-16 | 1.65E-15 | AAEL013288-PA OS=Aedes aegypti GN=AAEL013288 PE=4 SV=1                 |
| CCG023003.1 | 682  | 0 | 440  | 0.001 | 22.55372695 | 14.46107823 | Up | 4.44E-16 | 1.64E-15 | AAEL008137-PA OS=Aedes aegypti GN=AAEL008137 PE=4 SV=1                 |
| CCG009461.1 | 1052 | 0 | 665  | 0.001 | 22.09815024 | 14.43163799 | Up | 4.44E-16 | 1.64E-15 | AAEL015464-PA OS=Aedes aegypti GN=AAEL015464 PE=3 SV=1                 |
| CCG025893.1 | 915  | 0 | 572  | 0.001 | 21.8536987  | 14.41558985 | Up | 4.44E-16 | 1.64E-15 | AAEL010638-PA OS=Aedes aegypti GN=AAEL010638 PE=3 SV=1                 |
| CCG026165.1 | 375  | 0 | 233  | 0.001 | 21.72074263 | 14.40678581 | Up | 4.44E-16 | 1.64E-15 | AAEL013544-PA OS=Aedes aegypti GN=AAEL013544 PE=4 SV=1                 |
| CCG001049.1 | 1362 | 0 | 798  | 0.001 | 20.48216216 | 14.3220804  | Up | 4.44E-16 | 1.64E-15 | AAEL009018-PA OS=Aedes aegypti GN=AAEL009018 PE=3 SV=1                 |
| CCG019074.1 | 1176 | 0 | 680  | 0.001 | 20.21396956 | 14.30306504 | Up | 4.44E-16 | 1.65E-15 | AAEL005606-PA OS=Aedes aegypti GN=AAEL005606 PE=4 SV=1                 |
| CCG011211.1 | 786  | 0 | 449  | 0.001 | 19.96980442 | 14.28553258 | Up | 4.44E-16 | 1.65E-15 | AAEL013288-PA OS=Aedes aegypti GN=AAEL013288 PE=4 SV=1                 |
| CCG005677.1 | 408  | 0 | 231  | 0.001 | 19.79255376 | 14.27267015 | Up | 4.44E-16 | 1.63E-15 | AAEL013744-PA OS=Aedes aegypti GN=AAEL013744 PE=2 SV=1                 |

|             |      |   |     |       |             |             |    |          |          |                                                                                     |
|-------------|------|---|-----|-------|-------------|-------------|----|----------|----------|-------------------------------------------------------------------------------------|
| CCG022736.1 | 405  | 0 | 208 | 0.001 | 17.95388042 | 14.13200807 | Up | 4.44E-16 | 1.63E-15 | AAEL007013-PA OS=Aedes aegypti GN=AAEL007013 PE=4 SV=1                              |
| CCG005940.1 | 579  | 0 | 292 | 0.001 | 17.63008086 | 14.10575147 | Up | 4.44E-16 | 1.66E-15 | AAEL005005-PA OS=Aedes aegypti GN=AAEL005005 PE=4 SV=1                              |
| CCG011022.1 | 309  | 0 | 153 | 0.001 | 17.30943801 | 14.07927126 | Up | 4.44E-16 | 1.65E-15 | AAEL013570-PA OS=Aedes aegypti GN=AAEL013570 PE=4 SV=1                              |
| CCG001950.1 | 579  | 0 | 285 | 0.001 | 17.20744193 | 14.07074502 | Up | 4.44E-16 | 1.66E-15 | AAEL008835-PA OS=Aedes aegypti GN=AAEL008835 PE=4 SV=1                              |
| CCG015322.1 | 294  | 0 | 143 | 0.001 | 17.00351557 | 14.05354544 | Up | 4.44E-16 | 1.63E-15 | AAEL013570-PA OS=Aedes aegypti GN=AAEL013570 PE=4 SV=1                              |
| CCG010904.1 | 443  | 0 | 214 | 0.001 | 16.88729397 | 14.04365055 | Up | 4.44E-16 | 1.63E-15 | Histone H2B OS=Aedes aegypti GN=AAEL015674 PE=3 SV=1                                |
| CCG018502.1 | 990  | 0 | 449 | 0.001 | 15.85481441 | 13.95263337 | Up | 4.44E-16 | 1.63E-15 | AAEL005916-PA OS=Aedes aegypti GN=AAEL005916 PE=4 SV=1                              |
| CCG018501.1 | 1558 | 0 | 698 | 0.001 | 15.661667   | 13.93495016 | Up | 4.44E-16 | 1.64E-15 | AAEL005916-PA OS=Aedes aegypti GN=AAEL005916 PE=4 SV=1                              |
| CCG010197.1 | 318  | 0 | 141 | 0.001 | 15.500368   | 13.92001485 | Up | 4.44E-16 | 1.63E-15 | AAEL012697-PA OS=Aedes aegypti GN=AAEL012697 PE=4 SV=1                              |
| CCG026935.1 | 444  | 0 | 195 | 0.001 | 15.35329723 | 13.9062609  | Up | 4.44E-16 | 1.63E-15 | AAEL003185-PA OS=Aedes aegypti GN=AAEL003185 PE=4 SV=1                              |
| CCG028110.1 | 636  | 0 | 275 | 0.001 | 15.11560709 | 13.8837513  | Up | 4.44E-16 | 1.63E-15 | Putative salivary secreted protein 62k-2 OS=Aedes albopictus PE=2 SV=1              |
| CCG002965.1 | 390  | 0 | 160 | 0.001 | 14.34185714 | 13.80794423 | Up | 4.44E-16 | 1.66E-15 | AAEL011472-PA OS=Aedes aegypti GN=AAEL011472 PE=4 SV=1                              |
| CCG001677.1 | 567  | 0 | 224 | 0.001 | 13.81067724 | 13.75349645 | Up | 4.44E-16 | 1.66E-15 | 5-hydroxyisourate hydrolase OS=Culex quinquefasciatus GN=CpipJ_CPIJ014057 PE=3 SV=1 |
| CCG003214.1 | 594  | 0 | 233 | 0.001 | 13.71259005 | 13.74321347 | Up | 4.44E-16 | 1.63E-15 | AAEL006892-PA OS=Aedes aegypti GN=AAEL006892 PE=4 SV=1                              |
| CCG008458.1 | 513  | 0 | 190 | 0.001 | 12.94750992 | 13.66038704 | Up | 4.44E-16 | 1.64E-15 | AAEL001949-PA OS=Aedes aegypti GN=AAEL001949 PE=4 SV=1                              |
| CCG025837.1 | 273  | 0 | 101 | 0.001 | 12.93328188 | 13.65880079 | Up | 4.44E-16 | 1.65E-15 | -                                                                                   |
| CCG006088.1 | 1563 | 0 | 548 | 0.001 | 12.2566447  | 13.58127647 | Up | 4.44E-16 | 1.66E-15 | AAEL005916-PA OS=Aedes aegypti GN=AAEL005916 PE=4 SV=1                              |
| CCG022213.1 | 594  | 0 | 195 | 0.001 | 11.47620197 | 13.48635764 | Up | 4.44E-16 | 1.66E-15 | AAEL006892-PA OS=Aedes aegypti GN=AAEL006892 PE=4 SV=1                              |

|             |      |   |     |       |             |             |    |          |          |                                                                                    |
|-------------|------|---|-----|-------|-------------|-------------|----|----------|----------|------------------------------------------------------------------------------------|
| CCG024120.1 | 572  | 0 | 182 | 0.001 | 11.12308806 | 13.44126975 | Up | 4.44E-16 | 1.66E-15 | AAEL013741-PA OS=Aedes aegypti GN=AAEL013741 PE=4 SV=1                             |
| CCG020442.1 | 544  | 0 | 173 | 0.001 | 11.11724611 | 13.44051184 | Up | 4.44E-16 | 1.63E-15 | Histone H2B OS=Aedes aegypti GN=AAEL015682 PE=3 SV=1                               |
| CCG011502.1 | 603  | 0 | 182 | 0.001 | 10.55125435 | 13.3651269  | Up | 4.44E-16 | 1.64E-15 | AAEL007855-PA OS=Aedes aegypti GN=AAEL007855 PE=4 SV=1                             |
| CCG012514.1 | 1050 | 0 | 315 | 0.001 | 10.48748303 | 13.35638086 | Up | 4.44E-16 | 1.65E-15 | AAEL007783-PA OS=Aedes aegypti GN=AAEL007783 PE=4 SV=1                             |
| CCG007503.1 | 730  | 0 | 213 | 0.001 | 10.20015473 | 13.31630342 | Up | 4.44E-16 | 1.64E-15 | AAEL012453-PA OS=Aedes aegypti GN=AAEL012453 PE=4 SV=1                             |
| CCG020171.1 | 1808 | 0 | 525 | 0.001 | 10.15104829 | 13.3093411  | Up | 4.44E-16 | 1.64E-15 | AAEL003429-PA OS=Aedes aegypti GN=AAEL003429 PE=4 SV=1                             |
| CCG015386.1 | 642  | 0 | 170 | 0.001 | 9.256864566 | 13.1763079  | Up | 4.44E-16 | 1.63E-15 | AAEL008029-PA OS=Aedes aegypti GN=AAEL008029 PE=3 SV=1                             |
| CCG007454.1 | 318  | 0 | 84  | 0.001 | 9.234261789 | 13.17278092 | Up | 4.44E-16 | 1.65E-15 | -                                                                                  |
| CCG019969.1 | 360  | 0 | 94  | 0.001 | 9.127994491 | 13.15608221 | Up | 4.44E-16 | 1.65E-15 | AAEL010787-PA OS=Aedes aegypti GN=AAEL010787 PE=3 SV=1                             |
| CCG014123.1 | 645  | 0 | 164 | 0.001 | 8.88861611  | 13.1177431  | Up | 4.44E-16 | 1.63E-15 | AAEL004817-PA OS=Aedes aegypti GN=AAEL004817 PE=4 SV=1                             |
| CCG026615.1 | 750  | 0 | 183 | 0.001 | 8.529819532 | 13.0582995  | Up | 4.44E-16 | 1.65E-15 | AAEL000499-PA OS=Aedes aegypti GN=SPZ1A PE=4 SV=1                                  |
| CCG000290.1 | 606  | 0 | 147 | 0.001 | 8.479978029 | 13.04984481 | Up | 4.44E-16 | 1.65E-15 | AAEL010818-PA OS=Aedes aegypti GN=AAEL010818 PE=3 SV=1                             |
| CCG003389.1 | 636  | 0 | 150 | 0.001 | 8.244876597 | 13.00928219 | Up | 4.44E-16 | 1.63E-15 | AAEL010110-PA OS=Aedes aegypti GN=AAEL010110 PE=4 SV=1                             |
| CCG006134.1 | 1008 | 0 | 228 | 0.001 | 7.90722927  | 12.94895654 | Up | 4.44E-16 | 1.65E-15 | Mediator complex subunit 4 OS=Culex quinquefasciatus GN=CpipJ_CPIJ013633 PE=4 SV=1 |
| CCG000332.1 | 837  | 0 | 187 | 0.001 | 7.81027211  | 12.9311571  | Up | 4.44E-16 | 1.64E-15 | AAEL005972-PA OS=Aedes aegypti GN=AAEL005972 PE=4 SV=1                             |
| CCG013043.1 | 1083 | 0 | 239 | 0.001 | 7.714707432 | 12.91339573 | Up | 4.44E-16 | 1.63E-15 | AAEL011245-PA OS=Aedes aegypti GN=AAEL011245 PE=4 SV=1                             |
| CCG020739.1 | 624  | 0 | 137 | 0.001 | 7.675134484 | 12.90597631 | Up | 4.44E-16 | 1.65E-15 | AAEL008570-PA OS=Aedes aegypti GN=AAEL008570 PE=3 SV=1                             |
| CCG011355.1 | 621  | 0 | 136 | 0.001 | 7.655918907 | 12.90235983 | Up | 4.44E-16 | 1.65E-15 | -                                                                                  |
| CCG011739.1 | 918  | 0 | 198 | 0.001 | 7.54002048  | 12.88035273 | Up | 4.44E-16 | 1.64E-15 | AAEL000769-PA OS=Aedes aegypti GN=AAEL000769 PE=4 SV=1                             |

|             |      |   |       |           |             |             |    |          |          |                                                                                      |
|-------------|------|---|-------|-----------|-------------|-------------|----|----------|----------|--------------------------------------------------------------------------------------|
| CCG007532.1 | 1350 | 0 | 285   | 0.001     | 7.380080652 | 12.84942087 | Up | 4.44E-16 | 1.63E-15 | Tubulin alpha-2 chain OS=Culex quinquefasciatus<br>GN=CpipJ_CPIJ004534 PE=3 SV=1     |
| CCG021211.1 | 288  | 0 | 59    | 0.001     | 7.161591422 | 12.8060645  | Up | 8.88E-16 | 3.24E-15 | AAEL004817-PA OS=Aedes aegypti GN=AAEL004817 PE=4<br>SV=1                            |
| CCG004420.1 | 477  | 0 | 96    | 0.001     | 7.03562803  | 12.78046349 | Up | 4.44E-16 | 1.64E-15 | AAEL003584-PA OS=Aedes aegypti GN=AAEL003584 PE=4<br>SV=1                            |
| CCG014324.1 | 804  | 0 | 159   | 0.001     | 6.913390556 | 12.75517771 | Up | 4.44E-16 | 1.66E-15 | AAEL009778-PA OS=Aedes aegypti GN=AAEL009778 PE=4<br>SV=1                            |
| CCG014506.1 | 561  | 0 | 108   | 0.001     | 6.729935635 | 12.71637699 | Up | 4.44E-16 | 1.64E-15 | AAEL007209-PA OS=Aedes aegypti GN=AAEL007209 PE=3<br>SV=1                            |
| CCG005992.1 | 636  | 0 | 122   | 0.001     | 6.705832966 | 12.71120083 | Up | 4.44E-16 | 1.65E-15 | -                                                                                    |
| CCG021098.1 | 491  | 0 | 94    | 0.001     | 6.692623252 | 12.70835609 | Up | 4.44E-16 | 1.64E-15 | -                                                                                    |
| CCG018504.1 | 1035 | 0 | 197   | 0.001     | 6.653894226 | 12.69998322 | Up | 4.44E-16 | 1.64E-15 | AAEL005916-PA OS=Aedes aegypti GN=AAEL005916 PE=4<br>SV=1                            |
| CCG018126.1 | 528  | 0 | 98    | 0.001     | 6.488468037 | 12.66366217 | Up | 4.44E-16 | 1.63E-15 | 60S ribosomal protein L17 OS=Culex quinquefasciatus<br>GN=CpipJ_CPIJ015624 PE=3 SV=1 |
| CCG015867.1 | 1667 | 0 | 306   | 0.001     | 6.417056204 | 12.6476959  | Up | 4.44E-16 | 1.64E-15 | AAEL006123-PA OS=Aedes aegypti GN=AAEL006123 PE=3<br>SV=1                            |
| CCG003655.1 | 591  | 0 | 105   | 0.001     | 6.210861355 | 12.60057765 | Up | 4.44E-16 | 1.66E-15 | Angiopoietin-like protein 2 (Fragment) OS=Aedes albopictus PE=2<br>SV=1              |
| CCG001796.1 | 363  | 0 | 63    | 0.001     | 6.067138944 | 12.56680064 | Up | 4.44E-16 | 1.65E-15 | -                                                                                    |
| CCG014303.1 | 708  | 0 | 120   | 0.001     | 5.925131656 | 12.5326315  | Up | 4.44E-16 | 1.63E-15 | -                                                                                    |
| CCG015326.1 | 498  | 0 | 84    | 0.001     | 5.896576805 | 12.52566194 | Up | 4.44E-16 | 1.63E-15 | AAEL000870-PA OS=Aedes aegypti GN=AAEL000870 PE=4<br>SV=1                            |
| CCG018919.1 | 969  | 2 | 13919 | 0.0886888 | 502.1509333 | 12.46708115 | Up | 9.36E-05 | 0.000153 | AAEL000923-PA OS=Aedes aegypti GN=AAEL000923 PE=4<br>SV=1                            |
| CCG002167.1 | 1236 | 0 | 200   | 0.001     | 5.656679089 | 12.46573961 | Up | 4.44E-16 | 1.65E-15 | AAEL005842-PA OS=Aedes aegypti GN=AAEL005842 PE=4<br>SV=1                            |
| CCG014186.1 | 507  | 0 | 81    | 0.001     | 5.585050135 | 12.44735452 | Up | 4.44E-16 | 1.65E-15 | AAEL014453-PA OS=Aedes aegypti GN=AAEL014453 PE=4<br>SV=1                            |
| CCG008065.1 | 351  | 0 | 55    | 0.001     | 5.477792657 | 12.41937894 | Up | 6.66E-15 | 2.40E-14 | -                                                                                    |
| CCG000647.1 | 1446 | 0 | 223   | 0.001     | 5.391214191 | 12.39639451 | Up | 4.44E-16 | 1.64E-15 | Angiopoietin like salivary protein OS=Aedes albopictus PE=2<br>SV=1                  |
| CCG007674.1 | 519  | 0 | 77    | 0.001     | 5.186488076 | 12.34054226 | Up | 4.44E-16 | 1.64E-15 | -                                                                                    |
| CCG009456.1 | 513  | 0 | 76    | 0.001     | 5.179003966 | 12.33845895 | Up | 4.44E-16 | 1.63E-15 | -                                                                                    |

|             |      |   |     |       |             |             |    |          |          |                                                                                                                           |
|-------------|------|---|-----|-------|-------------|-------------|----|----------|----------|---------------------------------------------------------------------------------------------------------------------------|
| CCG023259.1 | 1203 | 0 | 174 | 0.001 | 5.056309359 | 12.30386902 | Up | 4.44E-16 | 1.63E-15 | AAEL007000-PA OS=Aedes aegypti GN=AAEL007000 PE=4 SV=1                                                                    |
| CCG021210.1 | 573  | 0 | 79  | 0.001 | 4.819727513 | 12.23473587 | Up | 4.44E-16 | 1.64E-15 | AAEL004817-PA OS=Aedes aegypti GN=AAEL004817 PE=4 SV=1                                                                    |
| CCG012033.1 | 315  | 0 | 43  | 0.001 | 4.772082226 | 12.22040319 | Up | 8.43E-12 | 1.88E-11 | AAEL013514-PA OS=Aedes aegypti GN=AAEL013514 PE=4 SV=1                                                                    |
| CCG028184.1 | 525  | 0 | 71  | 0.001 | 4.727690763 | 12.20691996 | Up | 4.44E-16 | 1.64E-15 | Putative uncharacterized protein OS=Aedes triseriatus PE=2 SV=1                                                           |
| CCG009600.1 | 429  | 0 | 58  | 0.001 | 4.726293829 | 12.20649361 | Up | 1.33E-15 | 4.84E-15 | AAEL005568-PA OS=Aedes aegypti GN=AAEL005568 PE=4 SV=1                                                                    |
| CCG025027.1 | 588  | 0 | 76  | 0.001 | 4.518416726 | 12.14160162 | Up | 4.44E-16 | 1.63E-15 | AAEL015271-PA OS=Aedes aegypti GN=AAEL015271 PE=3 SV=1                                                                    |
| CCG007675.1 | 648  | 0 | 80  | 0.001 | 4.315836639 | 12.07542454 | Up | 4.44E-16 | 1.65E-15 | AAEL011896-PA OS=Aedes aegypti GN=AAEL011896 PE=4 SV=1                                                                    |
| CCG011184.1 | 1044 | 0 | 128 | 0.001 | 4.286072248 | 12.06544045 | Up | 4.44E-16 | 1.64E-15 | AAEL013701-PA OS=Aedes aegypti GN=AAEL013701 PE=4 SV=1                                                                    |
| CCG007694.1 | 304  | 0 | 37  | 0.001 | 4.254790265 | 12.0548723  | Up | 3.00E-10 | 6.30E-10 | Importin9 OS=Culex quinquefasciatus GN=CpipJ_CPIJ008197 PE=4 SV=1                                                         |
| CCG010539.1 | 486  | 0 | 57  | 0.001 | 4.100044807 | 12.00142396 | Up | 2.22E-15 | 8.04E-15 | tRNA-dihydrouridine synthase OS=Aedes aegypti GN=AAEL005898 PE=3 SV=1                                                     |
| CCG010138.1 | 375  | 0 | 43  | 0.001 | 4.00854907  | 11.96886442 | Up | 8.43E-12 | 1.88E-11 | Chromosome undetermined SCAF14565, whole genome shotgun sequence OS=Tetraodon nigroviridis GN=GSTENG00016696001 PE=3 SV=1 |
| CCG017704.1 | 307  | 0 | 35  | 0.001 | 3.985471293 | 11.96053462 | Up | 9.86E-10 | 2.03E-09 | -                                                                                                                         |
| CCG027565.1 | 1758 | 0 | 199 | 0.001 | 3.957165573 | 11.95025172 | Up | 4.44E-16 | 1.65E-15 | 60 kDa chaperonin OS=Wolbachia endosymbiont of Drosophila ananassae GN=groL PE=3 SV=1                                     |
| CCG006563.1 | 375  | 0 | 42  | 0.001 | 3.915326998 | 11.93491709 | Up | 1.53E-11 | 3.37E-11 | AAEL000138-PA OS=Aedes aegypti GN=AAEL000138 PE=4 SV=1                                                                    |
| CCG011738.1 | 846  | 0 | 94  | 0.001 | 3.884252975 | 11.92342145 | Up | 4.44E-16 | 1.66E-15 | AAEL000769-PA OS=Aedes aegypti GN=AAEL000769 PE=4 SV=1                                                                    |
| CCG009543.1 | 487  | 0 | 54  | 0.001 | 3.876277096 | 11.92045599 | Up | 1.20E-14 | 4.28E-14 | GL12416 OS=Drosophila persimilis GN=GL12416 PE=3 SV=1                                                                     |
| CCG024135.1 | 705  | 0 | 78  | 0.001 | 3.867724239 | 11.91726922 | Up | 4.44E-16 | 1.65E-15 | AAEL006460-PA OS=Aedes aegypti GN=AAEL006460 PE=4 SV=1                                                                    |
| CCG016735.1 | 381  | 0 | 42  | 0.001 | 3.853668306 | 11.91201669 | Up | 1.53E-11 | 3.37E-11 | Putative uncharacterized protein OS=Culex quinquefasciatus GN=CpipJ_CPIJ004470 PE=4 SV=1                                  |

|             |      |   |     |       |             |             |    |          |          |                                                                                              |
|-------------|------|---|-----|-------|-------------|-------------|----|----------|----------|----------------------------------------------------------------------------------------------|
| CCG022130.1 | 1578 | 0 | 173 | 0.001 | 3.832561395 | 11.90409319 | Up | 4.44E-16 | 1.63E-15 | Alkaline phosphatase OS=Culex quinquefasciatus<br>GN=CpipJ_CPIJ001263 PE=3 SV=1              |
| CCG023824.1 | 522  | 0 | 57  | 0.001 | 3.817283096 | 11.89833047 | Up | 2.22E-15 | 8.05E-15 | AAEL004355-PA OS=Aedes aegypti GN=AAEL004355 PE=4<br>SV=1                                    |
| CCG016379.1 | 240  | 0 | 26  | 0.001 | 3.78714665  | 11.88689557 | Up | 2.09E-07 | 3.96E-07 | AAEL014317-PA OS=Aedes aegypti GN=AAEL014317 PE=4<br>SV=1                                    |
| CCG021133.1 | 435  | 0 | 47  | 0.001 | 3.777101169 | 11.88306371 | Up | 7.79E-13 | 1.95E-12 | AAEL000566-PA OS=Aedes aegypti GN=AAEL000566 PE=4<br>SV=1                                    |
| CCG007086.1 | 631  | 0 | 68  | 0.001 | 3.767294486 | 11.8793131  | Up | 4.44E-16 | 1.65E-15 | Putative uncharacterized protein (Fragment) OS=Solenopsis<br>invicta GN=SINV_11683 PE=4 SV=1 |
| CCG003434.1 | 764  | 0 | 81  | 0.001 | 3.706309448 | 11.85576763 | Up | 4.44E-16 | 1.64E-15 | -                                                                                            |
| CCG010580.1 | 456  | 0 | 48  | 0.001 | 3.679818608 | 11.84541894 | Up | 4.29E-13 | 1.13E-12 | AAEL013835-PA OS=Aedes aegypti GN=AAEL013835 PE=4<br>SV=1                                    |
| CCG018706.1 | 1306 | 0 | 137 | 0.001 | 3.667139294 | 11.84043935 | Up | 4.44E-16 | 1.64E-15 | AAEL007131-PA OS=Aedes aegypti GN=AAEL007131 PE=4<br>SV=1                                    |
| CCG003332.1 | 1017 | 0 | 105 | 0.001 | 3.609261614 | 11.817488   | Up | 4.44E-16 | 1.63E-15 | AAEL009198-PB OS=Aedes aegypti GN=AAEL009198 PE=4<br>SV=1                                    |
| CCG003288.1 | 501  | 0 | 51  | 0.001 | 3.558626977 | 11.797105   | Up | 7.17E-14 | 2.33E-13 | AAEL009160-PA OS=Aedes aegypti GN=AAEL009160 PE=4<br>SV=1                                    |
| CCG000328.1 | 864  | 0 | 87  | 0.001 | 3.520104258 | 11.78140244 | Up | 4.44E-16 | 1.63E-15 | Putative uncharacterized protein OS=Culex quinquefasciatus<br>GN=CpipJ_CPIJ008885 PE=4 SV=1  |
| CCG021199.1 | 1269 | 0 | 127 | 0.001 | 3.498582467 | 11.77255478 | Up | 4.44E-16 | 1.65E-15 | AAEL003128-PA OS=Aedes aegypti GN=AAEL003128 PE=4<br>SV=1                                    |
| CCG015454.1 | 852  | 0 | 85  | 0.001 | 3.487621509 | 11.76802777 | Up | 4.44E-16 | 1.63E-15 | AAEL003128-PA OS=Aedes aegypti GN=AAEL003128 PE=4<br>SV=1                                    |
| CCG001048.1 | 1515 | 0 | 150 | 0.001 | 3.461215522 | 11.75706306 | Up | 4.44E-16 | 1.63E-15 | Cytochrome P450 6CB1 (Fragment) OS=Aedes aegypti<br>GN=CYP6CB1 PE=2 SV=1                     |
| CCG027096.1 | 462  | 0 | 44  | 0.001 | 3.329359693 | 11.70102903 | Up | 4.65E-12 | 1.06E-11 | AAEL002671-PA OS=Aedes aegypti GN=AAEL002671 PE=4<br>SV=1                                    |
| CCG028111.1 | 1725 | 0 | 164 | 0.001 | 3.323569502 | 11.69851781 | Up | 4.44E-16 | 1.64E-15 | Putative 62 kDa salivary secreted protein OS=Aedes albopictus<br>PE=2 SV=1                   |
| CCG003899.1 | 600  | 0 | 56  | 0.001 | 3.262772499 | 11.67188268 | Up | 3.77E-15 | 1.36E-14 | AAEL009434-PA OS=Aedes aegypti GN=AAEL009434 PE=4<br>SV=1                                    |
| CCG002549.1 | 561  | 0 | 52  | 0.001 | 3.24033938  | 11.66192921 | Up | 3.95E-14 | 1.36E-13 | AAEL006786-PA OS=Aedes aegypti GN=AAEL006786 PE=3<br>SV=1                                    |



|             |      |   |     |       |             |             |    |          |          |                                                                                           |
|-------------|------|---|-----|-------|-------------|-------------|----|----------|----------|-------------------------------------------------------------------------------------------|
| CCG027414.1 | 885  | 0 | 81  | 0.001 | 3.199571094 | 11.64366281 | Up | 4.44E-16 | 1.63E-15 | AAEL000713-PA OS=Aedes aegypti GN=AAEL000713 PE=4 SV=1                                    |
| CCG006932.1 | 885  | 0 | 78  | 0.001 | 3.081068461 | 11.58921502 | Up | 4.44E-16 | 1.64E-15 | AAEL008197-PA OS=Aedes aegypti GN=AAEL008197 PE=3 SV=1                                    |
| CCG020714.1 | 453  | 0 | 39  | 0.001 | 3.009652967 | 11.55538143 | Up | 9.12E-11 | 1.95E-10 | AAEL002550-PA OS=Aedes aegypti GN=AAEL002550 PE=4 SV=1                                    |
| CCG025321.1 | 234  | 0 | 20  | 0.001 | 2.987886904 | 11.54490983 | Up | 7.45E-06 | 1.32E-05 | AAEL007034-PA OS=Aedes aegypti GN=AAEL007034 PE=4 SV=1                                    |
| CCG020332.1 | 273  | 0 | 23  | 0.001 | 2.945202805 | 11.52415127 | Up | 1.25E-06 | 2.29E-06 | -                                                                                         |
| CCG025524.1 | 672  | 0 | 56  | 0.001 | 2.913189731 | 11.50838395 | Up | 3.77E-15 | 1.36E-14 | -                                                                                         |
| CCG008382.1 | 756  | 0 | 61  | 0.001 | 2.820707517 | 11.46184136 | Up | 4.44E-16 | 1.66E-15 | AAEL001674-PA OS=Aedes aegypti GN=AAEL001674 PE=3 SV=1                                    |
| CCG008209.1 | 480  | 0 | 38  | 0.001 | 2.767530244 | 11.43438337 | Up | 1.65E-10 | 3.51E-10 | AAEL006670-PA OS=Aedes aegypti GN=AAEL006670 PE=4 SV=1                                    |
| CCG003930.1 | 354  | 0 | 28  | 0.001 | 2.76506144  | 11.43309582 | Up | 6.36E-08 | 1.23E-07 | -                                                                                         |
| CCG016850.2 | 1675 | 0 | 130 | 0.001 | 2.71317969  | 11.40576888 | Up | 4.44E-16 | 1.66E-15 | Alkaline phosphatase OS=Culex quinquefasciatus GN=CpipJ_CPIJ001263 PE=3 SV=1              |
| CCG004836.1 | 774  | 0 | 59  | 0.001 | 2.664778204 | 11.37979974 | Up | 8.88E-16 | 3.24E-15 | AAEL010110-PA OS=Aedes aegypti GN=AAEL010110 PE=4 SV=1                                    |
| CCG016419.1 | 689  | 0 | 52  | 0.001 | 2.638360511 | 11.365426   | Up | 3.95E-14 | 1.36E-13 | -                                                                                         |
| CCG001623.1 | 426  | 0 | 32  | 0.001 | 2.625973842 | 11.35863683 | Up | 5.88E-09 | 1.18E-08 | AAEL000262-PA OS=Aedes aegypti GN=AAEL000262 PE=4 SV=1                                    |
| CCG004395.1 | 228  | 0 | 17  | 0.001 | 2.60653818  | 11.34791928 | Up | 4.44E-05 | 7.47E-05 | -                                                                                         |
| CCG000318.1 | 297  | 0 | 22  | 0.001 | 2.589501983 | 11.33845895 | Up | 2.26E-06 | 4.09E-06 | -                                                                                         |
| CCG014440.1 | 435  | 0 | 32  | 0.001 | 2.571643349 | 11.32847486 | Up | 5.88E-09 | 1.18E-08 | -                                                                                         |
| CCG003756.1 | 390  | 0 | 28  | 0.001 | 2.509824999 | 11.29337106 | Up | 6.36E-08 | 1.23E-07 | -                                                                                         |
| CCG016848.1 | 1173 | 0 | 84  | 0.001 | 2.503406009 | 11.28967657 | Up | 4.44E-16 | 1.63E-15 | AAEL008858-PA OS=Aedes aegypti GN=AAEL008858 PE=4 SV=1                                    |
| CCG007744.1 | 1461 | 0 | 102 | 0.001 | 2.440618912 | 11.25303133 | Up | 4.44E-16 | 1.63E-15 | AAEL006058-PA OS=Aedes aegypti GN=CYP325Q2 PE=3 SV=1                                      |
| CCG014096.1 | 273  | 0 | 19  | 0.001 | 2.432993622 | 11.24851682 | Up | 1.35E-05 | 2.35E-05 | AAEL004628-PA OS=Aedes aegypti GN=AAEL004628 PE=4 SV=1                                    |
| CCG022715.1 | 507  | 0 | 35  | 0.001 | 2.413293268 | 11.23678753 | Up | 9.86E-10 | 2.03E-09 | AAEL014001-PA OS=Aedes aegypti GN=AAEL014001 PE=4 SV=1                                    |
| CCG027885.1 | 428  | 0 | 29  | 0.001 | 2.368668286 | 11.20986046 | Up | 3.51E-08 | 6.86E-08 | Putative uncharacterized protein (Fragment) OS=Solenopsis invicta GN=SINV_11683 PE=4 SV=1 |

|             |      |   |     |       |             |             |    |          |          |                                                                                                      |
|-------------|------|---|-----|-------|-------------|-------------|----|----------|----------|------------------------------------------------------------------------------------------------------|
| CCG027673.1 | 428  | 0 | 29  | 0.001 | 2.368668286 | 11.20986046 | Up | 3.51E-08 | 6.85E-08 | AAEL010609-PA OS=Aedes aegypti GN=AAEL010609 PE=4 SV=1                                               |
| CCG010581.1 | 459  | 0 | 31  | 0.001 | 2.361016514 | 11.20519242 | Up | 1.07E-08 | 2.13E-08 | AAEL007592-PA OS=Aedes aegypti GN=AAEL007592 PE=4 SV=1                                               |
| CCG006375.1 | 1099 | 0 | 72  | 0.001 | 2.290260171 | 11.16129578 | Up | 4.44E-16 | 1.63E-15 | Peritrophin OS=Aedes aegypti PE=2 SV=1                                                               |
| CCG015991.1 | 819  | 0 | 53  | 0.001 | 2.262257227 | 11.14354726 | Up | 2.18E-14 | 7.61E-14 | AAEL011891-PA OS=Aedes aegypti GN=AAEL011891 PE=3 SV=1                                               |
| CCG004740.1 | 282  | 0 | 18  | 0.001 | 2.231379368 | 11.1237201  | Up | 2.45E-05 | 4.20E-05 | AAEL000685-PA OS=Aedes aegypti GN=AAEL000685 PE=4 SV=1                                               |
| CCG011427.1 | 576  | 0 | 36  | 0.001 | 2.184892298 | 11.09334645 | Up | 5.44E-10 | 1.13E-09 | -                                                                                                    |
| CCG021472.1 | 804  | 0 | 50  | 0.001 | 2.174022187 | 11.08615095 | Up | 1.30E-13 | 3.98E-13 | Predicted protein OS=Culex quinquefasciatus GN=CpipJ_CPIJ015175 PE=4 SV=1                            |
| CCG003581.1 | 1773 | 0 | 109 | 0.001 | 2.149155199 | 11.06955395 | Up | 4.44E-16 | 1.65E-15 | -                                                                                                    |
| CCG015992.1 | 819  | 0 | 50  | 0.001 | 2.134204931 | 11.059483   | Up | 1.30E-13 | 3.98E-13 | AAEL011889-PA OS=Aedes aegypti GN=AAEL011889 PE=3 SV=1                                               |
| CCG028396.1 | 629  | 0 | 38  | 0.001 | 2.111946768 | 11.04435776 | Up | 1.65E-10 | 3.51E-10 | ATP-binding cassette sub-family G member 4 OS=Culex quinquefasciatus GN=CpipJ_CPIJ012372 PE=3 SV=1   |
| CCG019502.1 | 876  | 0 | 52  | 0.001 | 2.075148849 | 11.01899911 | Up | 3.95E-14 | 1.36E-13 | AAEL001693-PA OS=Aedes aegypti GN=AAEL001693 PE=3 SV=1                                               |
| CCG005904.1 | 371  | 0 | 22  | 0.001 | 2.072997544 | 11.01750269 | Up | 2.26E-06 | 4.09E-06 | AAEL010586-PA OS=Aedes aegypti GN=AAEL010586 PE=4 SV=1                                               |
| CCG019284.1 | 577  | 0 | 34  | 0.001 | 2.05993312  | 11.00838178 | Up | 1.79E-09 | 3.66E-09 | Histone H2B OS=Aedes aegypti GN=AAEL015682 PE=3 SV=1                                                 |
| CCG006476.1 | 704  | 0 | 41  | 0.001 | 2.035922369 | 10.99146684 | Up | 2.77E-11 | 6.04E-11 | AGAP008251-PA OS=Anopheles gambiae GN=AGAP008251 PE=4 SV=3                                           |
| CCG024788.1 | 606  | 0 | 35  | 0.001 | 2.019042388 | 10.97945548 | Up | 9.86E-10 | 2.03E-09 | AAEL011908-PA OS=Aedes aegypti GN=AAEL011908 PE=3 SV=1                                               |
| CCG023894.1 | 768  | 0 | 44  | 0.001 | 2.00281794  | 10.96781557 | Up | 4.65E-12 | 1.06E-11 | -                                                                                                    |
| CCG015526.1 | 1983 | 0 | 113 | 0.001 | 1.992075277 | 10.96005645 | Up | 4.44E-16 | 1.64E-15 | AGAP003785-PB OS=Anopheles gambiae GN=AgaP_AGAP003785 PE=3 SV=1                                      |
| CCG019747.1 | 1059 | 0 | 59  | 0.001 | 1.947628262 | 10.92750263 | Up | 8.88E-16 | 3.24E-15 | Uncharacterized protein OS=Anopheles darlingi GN=AND_02187 PE=4 SV=1                                 |
| CCG000671.1 | 433  | 0 | 24  | 0.001 | 1.937641207 | 10.92008574 | Up | 6.88E-07 | 1.27E-06 | Nucleosome-remodeling factor subunit NURF301 OS=Culex quinquefasciatus GN=CpipJ_CPIJ011284 PE=4 SV=1 |
| CCG018745.1 | 291  | 0 | 16  | 0.001 | 1.922104565 | 10.90847111 | Up | 8.05E-05 | 0.000133 | AAEL001787-PA OS=Aedes aegypti GN=AAEL001787 PE=4 SV=1                                               |

|             |      |   |      |           |             |             |    |          |          |                                                                                          |
|-------------|------|---|------|-----------|-------------|-------------|----|----------|----------|------------------------------------------------------------------------------------------|
| CCG011485.1 | 787  | 0 | 43   | 0.001     | 1.910045618 | 10.89939138 | Up | 8.43E-12 | 1.88E-11 | -                                                                                        |
| CCG026937.1 | 663  | 0 | 36   | 0.001     | 1.898186974 | 10.89040639 | Up | 5.44E-10 | 1.13E-09 | AGAP006786-PA OS=Anopheles gambiae GN=AGAP006786 PE=4 SV=4                               |
| CCG007699.1 | 1743 | 0 | 94   | 0.001     | 1.885300067 | 10.88057845 | Up | 4.44E-16 | 1.64E-15 | AAEL013916-PA OS=Aedes aegypti GN=AAEL013916 PE=4 SV=1                                   |
| CCG002213.1 | 1042 | 0 | 56   | 0.001     | 1.878755757 | 10.87556181 | Up | 3.77E-15 | 1.36E-14 | -                                                                                        |
| CCG020723.1 | 2793 | 0 | 150  | 0.001     | 1.877458473 | 10.87456528 | Up | 4.44E-16 | 1.65E-15 | AAEL011258-PA OS=Aedes aegypti GN=AAEL011258 PE=4 SV=1                                   |
| CCG001867.2 | 789  | 0 | 42   | 0.001     | 1.860896862 | 10.86178238 | Up | 1.53E-11 | 3.37E-11 | AAEL008206-PA OS=Aedes aegypti GN=AAEL008206 PE=3 SV=1                                   |
| CCG005993.1 | 810  | 0 | 43   | 0.001     | 1.855809755 | 10.85783311 | Up | 8.43E-12 | 1.88E-11 | Putative uncharacterized protein OS=Culex quinquefasciatus GN=CpipJ_CPIJ017971 PE=4 SV=1 |
| CCG006420.1 | 1434 | 1 | 2280 | 0.0299649 | 55.58219738 | 10.85713131 | Up | 0.00059  | 0.000916 | Tubulin alpha-2 chain OS=Culex quinquefasciatus GN=CpipJ_CPIJ004534 PE=3 SV=1            |
| CCG017177.1 | 387  | 0 | 20   | 0.001     | 1.806629291 | 10.81908479 | Up | 7.45E-06 | 1.32E-05 | Uncharacterized protein OS=Anopheles darlingi GN=AND_22381 PE=4 SV=1                     |
| CCG016983.1 | 387  | 0 | 20   | 0.001     | 1.806629291 | 10.81908479 | Up | 7.45E-06 | 1.32E-05 | Putative uncharacterized protein OS=Culex quinquefasciatus GN=CpipJ_CPIJ011615 PE=4 SV=1 |
| CCG013847.1 | 387  | 0 | 20   | 0.001     | 1.806629291 | 10.81908479 | Up | 7.45E-06 | 1.32E-05 | AAEL001980-PA OS=Aedes aegypti GN=AAEL001980 PE=4 SV=1                                   |
| CCG020646.1 | 271  | 0 | 14   | 0.001     | 1.805962638 | 10.81855233 | Up | 0.00026  | 0.000423 | -                                                                                        |
| CCG005210.1 | 935  | 1 | 2216 | 0.0459569 | 82.85298538 | 10.81605537 | Up | 0.00059  | 0.000918 | AAEL017320-PA OS=Aedes aegypti GN=FOHSDR-2 PE=2 SV=1                                     |
| CCG019640.1 | 315  | 0 | 16   | 0.001     | 1.775658503 | 10.79413843 | Up | 8.05E-05 | 0.000133 | AAEL006670-PA OS=Aedes aegypti GN=AAEL006670 PE=4 SV=1                                   |
| CCG021787.1 | 636  | 0 | 32   | 0.001     | 1.758907007 | 10.78046349 | Up | 5.88E-09 | 1.18E-08 | AAEL009165-PA OS=Aedes aegypti GN=AAEL009165 PE=4 SV=1                                   |
| CCG011336.1 | 558  | 0 | 28   | 0.001     | 1.754178763 | 10.77658006 | Up | 6.36E-08 | 1.23E-07 | AAEL010291-PA OS=Aedes aegypti GN=AAEL010291 PE=4 SV=1                                   |
| CCG014198.1 | 1059 | 0 | 53   | 0.001     | 1.749564371 | 10.77278003 | Up | 2.18E-14 | 7.62E-14 | Uncharacterized protein OS=Anopheles darlingi GN=AND_02187 PE=4 SV=1                     |
| CCG015948.1 | 282  | 0 | 14   | 0.001     | 1.735517287 | 10.76115002 | Up | 0.00026  | 0.000423 | AAEL005702-PA OS=Aedes aegypti GN=AAEL005702 PE=4 SV=1                                   |
| CCG006761.1 | 456  | 0 | 22   | 0.001     | 1.686583528 | 10.71988805 | Up | 2.26E-06 | 4.09E-06 | AGAP003907-PA OS=Anopheles gambiae GN=AGAP003907 PE=4 SV=2                               |

|             |      |   |      |           |             |             |    |          |          |                                                                                               |
|-------------|------|---|------|-----------|-------------|-------------|----|----------|----------|-----------------------------------------------------------------------------------------------|
| CCG001643.1 | 940  | 0 | 45   | 0.001     | 1.673534526 | 10.7086826  | Up | 2.56E-12 | 6.04E-12 | AAEL000739-PA OS=Aedes aegypti GN=AAEL000739 PE=4 SV=1                                        |
| CCG003309.1 | 1590 | 0 | 75   | 0.001     | 1.648975319 | 10.68735409 | Up | 4.44E-16 | 1.66E-15 | Putative uncharacterized protein OS=Culex quinquefasciatus GN=CpipJ_CPIJ005832 PE=4 SV=1      |
| CCG028030.1 | 531  | 0 | 25   | 0.001     | 1.645869905 | 10.68463459 | Up | 3.80E-07 | 7.11E-07 | -                                                                                             |
| CCG006085.3 | 1983 | 1 | 2001 | 0.0216691 | 35.2755985  | 10.66881866 | Up | 0.00059  | 0.000917 | AAEL005916-PA OS=Aedes aegypti GN=AAEL005916 PE=4 SV=1                                        |
| CCG020221.1 | 345  | 0 | 16   | 0.001     | 1.621253416 | 10.6628939  | Up | 8.05E-05 | 0.000133 | -                                                                                             |
| CCG002901.1 | 1123 | 0 | 52   | 0.001     | 1.618726974 | 10.66064396 | Up | 3.95E-14 | 1.36E-13 | -                                                                                             |
| CCG019076.1 | 522  | 0 | 24   | 0.001     | 1.607277093 | 10.65040295 | Up | 6.88E-07 | 1.27E-06 | AGAP004620-PC OS=Anopheles gambiae GN=AgaP_AGAP004620 PE=3 SV=1                               |
| CCG023240.1 | 309  | 0 | 14   | 0.001     | 1.583870145 | 10.62923834 | Up | 0.00026  | 0.000423 | AAEL012826-PA OS=Aedes aegypti GN=AAEL012826 PE=4 SV=1                                        |
| CCG004746.1 | 515  | 0 | 23   | 0.001     | 1.561243429 | 10.60847978 | Up | 1.25E-06 | 2.29E-06 | Tetratricopeptide repeat protein, tpr OS=Culex quinquefasciatus GN=CpipJ_CPIJ016841 PE=4 SV=1 |
| CCG023082.1 | 588  | 0 | 26   | 0.001     | 1.545774143 | 10.59411382 | Up | 2.09E-07 | 3.96E-07 | AAEL012787-PA OS=Aedes aegypti GN=AAEL012787 PE=4 SV=1                                        |
| CCG004266.1 | 993  | 0 | 43   | 0.001     | 1.513802519 | 10.5639613  | Up | 8.43E-12 | 1.88E-11 | Putative uncharacterized protein OS=Culex quinquefasciatus GN=CpipJ_CPIJ005433 PE=4 SV=1      |
| CCG009949.1 | 381  | 0 | 16   | 0.001     | 1.468064116 | 10.51969926 | Up | 8.05E-05 | 0.000133 | AAEL000073-PA OS=Aedes aegypti GN=AAEL000073 PE=4 SV=1                                        |
| CCG027213.1 | 549  | 0 | 23   | 0.001     | 1.4645544   | 10.51624607 | Up | 1.25E-06 | 2.29E-06 | AAEL010722-PA OS=Aedes aegypti GN=AAEL010722 PE=4 SV=1                                        |
| CCG027450.1 | 669  | 0 | 28   | 0.001     | 1.463126681 | 10.51483897 | Up | 6.36E-08 | 1.23E-07 | -                                                                                             |
| CCG017730.1 | 456  | 0 | 19   | 0.001     | 1.456594866 | 10.50838395 | Up | 1.35E-05 | 2.35E-05 | AAEL009598-PA OS=Aedes aegypti GN=AAEL009598 PE=4 SV=1                                        |
| CCG004491.1 | 362  | 0 | 15   | 0.001     | 1.44854738  | 10.50039116 | Up | 0.00015  | 0.000236 | -                                                                                             |
| CCG023219.1 | 388  | 0 | 16   | 0.001     | 1.441578424 | 10.49343361 | Up | 8.05E-05 | 0.000133 | AAEL010576-PM OS=Aedes aegypti GN=AAEL010576 PE=4 SV=1                                        |
| CCG006370.1 | 853  | 0 | 35   | 0.001     | 1.434395882 | 10.48622754 | Up | 9.86E-10 | 2.03E-09 | -                                                                                             |
| CCG001247.1 | 390  | 0 | 16   | 0.001     | 1.434185714 | 10.48601614 | Up | 8.05E-05 | 0.000133 | -                                                                                             |
| CCG001883.1 | 342  | 0 | 14   | 0.001     | 1.43104057  | 10.48284886 | Up | 0.00026  | 0.000423 | -                                                                                             |
| CCG019402.1 | 1164 | 0 | 47   | 0.001     | 1.41154554  | 10.46305996 | Up | 7.79E-13 | 1.95E-12 | Uncharacterized protein OS=Anopheles darlingi GN=AND_00916 PE=4 SV=1                          |

|             |      |   |      |           |             |             |    |          |          |                                                                                                                                                                               |
|-------------|------|---|------|-----------|-------------|-------------|----|----------|----------|-------------------------------------------------------------------------------------------------------------------------------------------------------------------------------|
| CCG006392.1 | 1683 | 2 | 3430 | 0.0510633 | 71.24592355 | 10.44630606 | Up | 9.36E-05 | 0.000154 | AAEL000335-PA OS=Aedes aegypti GN=AAEL000335 PE=4 SV=1                                                                                                                        |
| CCG027975.1 | 351  | 0 | 14   | 0.001     | 1.394347222 | 10.44537415 | Up | 0.00026  | 0.000423 | -                                                                                                                                                                             |
| CCG007233.1 | 429  | 0 | 17   | 0.001     | 1.385293019 | 10.43597545 | Up | 4.44E-05 | 7.48E-05 | -                                                                                                                                                                             |
| CCG014996.1 | 357  | 0 | 14   | 0.001     | 1.370912815 | 10.42092111 | Up | 0.00026  | 0.000423 | -                                                                                                                                                                             |
| CCG017274.1 | 647  | 0 | 25   | 0.001     | 1.350783492 | 10.39958074 | Up | 3.80E-07 | 7.11E-07 | Putative uncharacterized protein (Fragment) OS=Solenopsis invicta GN=SINV_11683 PE=4 SV=1                                                                                     |
| CCG004633.1 | 442  | 0 | 17   | 0.001     | 1.344549107 | 10.39290673 | Up | 4.44E-05 | 7.47E-05 | Putative secreted protein OS=Aedes aegypti PE=2 SV=1                                                                                                                          |
| CCG003228.1 | 573  | 0 | 22   | 0.001     | 1.342202599 | 10.39038674 | Up | 2.26E-06 | 4.09E-06 | Modifier of mdg4 OS=Culex quinquefasciatus GN=CpipJ_CPIJ001640 PE=4 SV=1                                                                                                      |
| CCG005663.1 | 579  | 0 | 22   | 0.001     | 1.328293763 | 10.37535853 | Up | 2.26E-06 | 4.09E-06 | AAEL013351-PA OS=Aedes aegypti GN=AAEL013351 PE=3 SV=1                                                                                                                        |
| CCG004919.1 | 825  | 0 | 31   | 0.001     | 1.313583733 | 10.35929245 | Up | 1.07E-08 | 2.13E-08 | AAEL002196-PA OS=Aedes aegypti GN=AAEL002196 PE=4 SV=1                                                                                                                        |
| CCG025882.1 | 348  | 0 | 13   | 0.001     | 1.305912638 | 10.35084267 | Up | 0.00048  | 0.000755 | AAEL013443-PA OS=Aedes aegypti GN=AAEL013443 PE=4 SV=1                                                                                                                        |
| CCG015725.1 | 1644 | 1 | 1593 | 0.0261373 | 33.87380468 | 10.33984376 | Up | 0.00059  | 0.000918 | AAEL000889-PA (Fragment) OS=Aedes aegypti GN=AAEL000889 PE=4 SV=2                                                                                                             |
| CCG001710.1 | 735  | 0 | 27   | 0.001     | 1.284181596 | 10.32663351 | Up | 1.15E-07 | 2.21E-07 | LINE-1 retrotransposon-like element, putative (Fragment) OS=Aspergillus flavus (strain ATCC 200026 / FGSC A1120 / NRRL 3357 / JCM 12722 / SRRRC 167) GN=AFLA_063980 PE=4 SV=1 |
| CCG022914.1 | 1206 | 0 | 44   | 0.001     | 1.27542635  | 10.31676388 | Up | 4.65E-12 | 1.06E-11 | AAEL010627-PA OS=Aedes aegypti GN=AAEL010627 PE=4 SV=1                                                                                                                        |
| CCG015990.1 | 741  | 0 | 27   | 0.001     | 1.273783364 | 10.31490422 | Up | 1.15E-07 | 2.21E-07 | Trypsin-2 OS=Culex quinquefasciatus GN=CpipJ_CPIJ000771 PE=3 SV=1                                                                                                             |
| CCG006089.1 | 1143 | 1 | 1531 | 0.0375938 | 46.82512838 | 10.28257177 | Up | 0.00059  | 0.000916 | AAEL005938-PA OS=Aedes aegypti GN=AAEL005938 PE=4 SV=1                                                                                                                        |
| CCG011964.1 | 702  | 0 | 25   | 0.001     | 1.244952877 | 10.28187542 | Up | 3.80E-07 | 7.11E-07 | Putative uncharacterized protein OS=Culex quinquefasciatus GN=CpipJ_CPIJ000496 PE=4 SV=1                                                                                      |
| CCG000320.1 | 816  | 0 | 29   | 0.001     | 1.242389738 | 10.2789021  | Up | 3.51E-08 | 6.85E-08 | AAEL005607-PA OS=Aedes aegypti GN=AAEL005607 PE=3 SV=1                                                                                                                        |
| CCG024174.1 | 1173 | 0 | 41   | 0.001     | 1.221900552 | 10.25491116 | Up | 2.77E-11 | 6.04E-11 | AAEL009292-PA OS=Aedes aegypti GN=AAEL009292 PE=4 SV=1                                                                                                                        |

|             |      |   |      |           |             |             |    |          |          |                                                                                                    |
|-------------|------|---|------|-----------|-------------|-------------|----|----------|----------|----------------------------------------------------------------------------------------------------|
| CCG011288.1 | 1452 | 0 | 50   | 0.001     | 1.20379741  | 10.2333769  | Up | 1.30E-13 | 3.98E-13 | Putative uncharacterized protein OS=Culex quinquefasciatus<br>GN=CpipJ_CPIJ004879 PE=4 SV=1        |
| CCG004140.1 | 528  | 0 | 18   | 0.001     | 1.191759435 | 10.21887733 | Up | 2.45E-05 | 4.20E-05 | -                                                                                                  |
| CCG026761.1 | 633  | 0 | 21   | 0.001     | 1.159753258 | 10.17960218 | Up | 4.11E-06 | 7.35E-06 | AAEL010402-PA OS=Aedes aegypti GN=AAEL010402 PE=3<br>SV=1                                          |
| CCG004069.1 | 573  | 0 | 19   | 0.001     | 1.159174972 | 10.17888263 | Up | 1.35E-05 | 2.35E-05 | AAEL012461-PA OS=Aedes aegypti GN=AAEL012461 PE=4<br>SV=1                                          |
| CCG028048.1 | 848  | 0 | 28   | 0.001     | 1.154282724 | 10.17278092 | Up | 6.36E-08 | 1.23E-07 | -                                                                                                  |
| CCG027637.1 | 546  | 0 | 18   | 0.001     | 1.152470663 | 10.17051431 | Up | 2.45E-05 | 4.20E-05 | AAEL011839-PA OS=Aedes aegypti GN=AAEL011839 PE=4<br>SV=1                                          |
| CCG003928.1 | 1276 | 0 | 42   | 0.001     | 1.150664282 | 10.16825126 | Up | 1.53E-11 | 3.37E-11 | AAEL012229-PA OS=Aedes aegypti GN=AAEL012229 PE=4<br>SV=1                                          |
| CCG007494.1 | 1035 | 0 | 33   | 0.001     | 1.114611723 | 10.12232552 | Up | 3.24E-09 | 6.60E-09 | AAEL000021-PA OS=Aedes aegypti GN=AAEL000021 PE=4<br>SV=1                                          |
| CCG006026.1 | 855  | 0 | 27   | 0.001     | 1.103945582 | 10.10845334 | Up | 1.15E-07 | 2.21E-07 | AAEL014239-PA OS=Aedes aegypti GN=AAEL014239 PE=4<br>SV=1                                          |
| CCG014442.1 | 507  | 0 | 16   | 0.001     | 1.10321978  | 10.10750451 | Up | 8.05E-05 | 0.000133 | AGAP004106-PA OS=Anopheles gambiae<br>GN=AgaP_AGAP004106 PE=4 SV=5                                 |
| CCG018521.1 | 480  | 0 | 15   | 0.001     | 1.092446149 | 10.09334645 | Up | 0.00015  | 0.000236 | AGAP013413-PA OS=Anopheles gambiae<br>GN=AgaP_AGAP013413 PE=4 SV=1                                 |
| CCG018342.1 | 513  | 0 | 16   | 0.001     | 1.090316624 | 10.09053143 | Up | 8.05E-05 | 0.000133 | -                                                                                                  |
| CCG011352.1 | 905  | 2 | 2656 | 0.0949607 | 102.5957824 | 10.07735264 | Up | 9.36E-05 | 0.000154 | Cation efflux protein/ zinc transporter OS=Culex quinquefasciatus<br>GN=CpipJ_CPIJ010101 PE=4 SV=1 |
| CCG007531.1 | 1347 | 2 | 2622 | 0.0638006 | 68.04795969 | 10.05876517 | Up | 9.36E-05 | 0.000154 | AAEL004172-PA OS=Aedes aegypti GN=AAEL004172 PE=3<br>SV=1                                          |
| CCG005605.1 | 1086 | 0 | 33   | 0.001     | 1.062268079 | 10.05293218 | Up | 3.24E-09 | 6.60E-09 | AAEL014814-PA OS=Aedes aegypti GN=AAEL014814 PE=4<br>SV=1                                          |
| CCG006777.1 | 660  | 0 | 20   | 0.001     | 1.05934172  | 10.04895233 | Up | 7.45E-06 | 1.32E-05 | AAEL007525-PA OS=Aedes aegypti GN=AAEL007525 PE=3<br>SV=1                                          |
| CCG002600.1 | 1395 | 0 | 42   | 0.001     | 1.052507258 | 10.03961447 | Up | 1.53E-11 | 3.37E-11 | Beta-galactosidase OS=Aedes aegypti GN=AAEL004575 PE=3<br>SV=1                                     |
| CCG023142.2 | 1705 | 0 | 51   | 0.001     | 1.045672795 | 10.03021577 | Up | 7.17E-14 | 2.33E-13 | Uncharacterized protein OS=Anopheles darlingi GN=AND_11211<br>PE=4 SV=1                            |
| CCG014603.1 | 504  | 0 | 15   | 0.001     | 1.040424904 | 10.02295712 | Up | 0.00015  | 0.000236 | AAEL011252-PA OS=Aedes aegypti GN=AAEL011252 PE=4<br>SV=1                                          |

|             |      |   |      |           |             |             |    |          |          |                                                                                          |
|-------------|------|---|------|-----------|-------------|-------------|----|----------|----------|------------------------------------------------------------------------------------------|
| CCG009113.1 | 445  | 0 | 13   | 0.001     | 1.021253029 | 9.996124642 | Up | 0.00048  | 0.000756 | -                                                                                        |
| CCG022113.1 | 1646 | 0 | 48   | 0.001     | 1.01943942  | 9.99356033  | Up | 4.29E-13 | 1.13E-12 | Uncharacterized protein OS=Anopheles darlingi GN=AND_11211 PE=4 SV=1                     |
| CCG014354.1 | 1112 | 0 | 32   | 0.001     | 1.005993576 | 9.974405377 | Up | 5.88E-09 | 1.18E-08 | U3 small nucleolar ribonucleoprotein component OS=Aedes aegypti PE=2 SV=1                |
| CCG006931.1 | 942  | 0 | 27   | 0.001     | 1.001988825 | 9.968650703 | Up | 1.15E-07 | 2.21E-07 | AAEL008202-PA OS=Aedes aegypti GN=AAEL008202 PE=3 SV=1                                   |
| CCG001329.1 | 462  | 0 | 13   | 0.001     | 0.983674455 | 9.942037127 | Up | 0.00048  | 0.000756 | AAEL004611-PA OS=Aedes aegypti GN=AAEL004611 PE=4 SV=1                                   |
| CCG014180.1 | 1566 | 0 | 44   | 0.001     | 0.98222489  | 9.939909572 | Up | 4.65E-12 | 1.06E-11 | AAEL002627-PA OS=Aedes aegypti GN=AAEL002627 PE=4 SV=1                                   |
| CCG003908.1 | 714  | 0 | 20   | 0.001     | 0.979223439 | 9.935494281 | Up | 7.45E-06 | 1.32E-05 | -                                                                                        |
| CCG017910.1 | 465  | 0 | 13   | 0.001     | 0.977328168 | 9.932699262 | Up | 0.00048  | 0.000755 | AAEL004145-PA OS=Aedes aegypti GN=AAEL004145 PE=4 SV=1                                   |
| CCG002251.1 | 576  | 0 | 16   | 0.001     | 0.971063244 | 9.923421449 | Up | 8.05E-05 | 0.000133 | AAEL004355-PA OS=Aedes aegypti GN=AAEL004355 PE=4 SV=1                                   |
| CCG001791.1 | 1155 | 0 | 32   | 0.001     | 0.968541001 | 9.919669314 | Up | 5.88E-09 | 1.18E-08 | Putative uncharacterized protein OS=Culex quinquefasciatus GN=CpipJ_CPIJ010663 PE=4 SV=1 |
| CCG004194.1 | 728  | 0 | 20   | 0.001     | 0.960392219 | 9.907479905 | Up | 7.45E-06 | 1.32E-05 | Uncharacterized protein OS=Anopheles darlingi GN=AND_11211 PE=4 SV=1                     |
| CCG020796.1 | 954  | 0 | 26   | 0.001     | 0.952741296 | 9.895940712 | Up | 2.09E-07 | 3.96E-07 | AGAP000537-PA OS=Anopheles gambiae GN=AgaP_AGAP000537 PE=4 SV=5                          |
| CCG016358.1 | 627  | 0 | 17   | 0.001     | 0.947832066 | 9.888487659 | Up | 4.44E-05 | 7.48E-05 | AAEL004696-PA OS=Aedes aegypti GN=AAEL004696 PE=4 SV=1                                   |
| CCG003594.1 | 1300 | 0 | 35   | 0.001     | 0.941184375 | 9.878333559 | Up | 9.86E-10 | 2.03E-09 | Uncharacterized protein (Fragment) OS=Xenopus tropicalis GN=LOC100489570 PE=4 SV=1       |
| CCG010936.1 | 486  | 0 | 13   | 0.001     | 0.935097938 | 9.868973665 | Up | 0.00048  | 0.000756 | -                                                                                        |
| CCG012873.1 | 834  | 1 | 1149 | 0.0515225 | 48.16194246 | 9.868476286 | Up | 0.00059  | 0.000917 | AAEL014128-PA OS=Aedes aegypti GN=AAEL014128 PE=4 SV=1                                   |
| CCG004071.1 | 1275 | 0 | 34   | 0.001     | 0.932220714 | 9.86452776  | Up | 1.79E-09 | 3.66E-09 | Putative uncharacterized protein OS=Culex quinquefasciatus GN=CpipJ_CPIJ012792 PE=4 SV=1 |
| CCG028611.1 | 528  | 0 | 14   | 0.001     | 0.926924005 | 9.856307253 | Up | 0.00026  | 0.000423 | AAEL011712-PA OS=Aedes aegypti GN=AAEL011712 PE=4 SV=1                                   |
| CCG023853.1 | 1434 | 0 | 38   | 0.001     | 0.926369956 | 9.855444655 | Up | 1.65E-10 | 3.51E-10 | AAEL008538-PA OS=Aedes aegypti GN=AAEL008538 PE=4 SV=1                                   |

|             |      |   |      |           |             |             |    |          |          |                                                                                          |
|-------------|------|---|------|-----------|-------------|-------------|----|----------|----------|------------------------------------------------------------------------------------------|
| CCG023174.1 | 1140 | 0 | 30   | 0.001     | 0.919954652 | 9.845418937 | Up | 1.93E-08 | 3.82E-08 | Yellow-g OS=Culex quinquefasciatus GN=CpipJ_CPIJ008961 PE=4 SV=1                         |
| CCG004677.1 | 690  | 0 | 18   | 0.001     | 0.911955046 | 9.8328189   | Up | 2.45E-05 | 4.20E-05 | AAEL001814-PA OS=Aedes aegypti GN=AAEL001814 PE=4 SV=1                                   |
| CCG004173.2 | 1764 | 0 | 46   | 0.001     | 0.911610392 | 9.832273561 | Up | 1.41E-12 | 3.42E-12 | AAEL007932-PA OS=Aedes aegypti GN=AAEL007932 PE=4 SV=1                                   |
| CCG013348.1 | 1317 | 0 | 34   | 0.001     | 0.90249158  | 9.817769661 | Up | 1.79E-09 | 3.66E-09 | Putative uncharacterized protein OS=Culex quinquefasciatus GN=CpipJ_CPIJ005075 PE=4 SV=1 |
| CCG012118.1 | 1520 | 0 | 39   | 0.001     | 0.896955786 | 9.808893061 | Up | 9.12E-11 | 1.95E-10 | Pol polyprotein (Fragment) OS=Anopheles gambiae PE=4 SV=1                                |
| CCG008688.1 | 507  | 0 | 13   | 0.001     | 0.896366071 | 9.807944231 | Up | 0.00048  | 0.000756 | AAEL004355-PA OS=Aedes aegypti GN=AAEL004355 PE=4 SV=1                                   |
| CCG009755.1 | 664  | 0 | 17   | 0.001     | 0.895016122 | 9.80576986  | Up | 4.44E-05 | 7.47E-05 | -                                                                                        |
| CCG000073.1 | 824  | 0 | 21   | 0.001     | 0.890926957 | 9.799163346 | Up | 4.11E-06 | 7.34E-06 | Putative uncharacterized protein OS=Tribolium castaneum GN=TcasGA2_TC010212 PE=4 SV=1    |
| CCG009557.1 | 1574 | 0 | 40   | 0.001     | 0.888393311 | 9.79505472  | Up | 5.03E-11 | 1.08E-10 | AAEL002671-PA OS=Aedes aegypti GN=AAEL002671 PE=4 SV=1                                   |
| CCG013494.1 | 836  | 0 | 21   | 0.001     | 0.878138531 | 9.778304741 | Up | 4.11E-06 | 7.35E-06 | AAEL005156-PA OS=Aedes aegypti GN=AAEL005156 PE=4 SV=1                                   |
| CCG023317.1 | 1275 | 0 | 32   | 0.001     | 0.877384201 | 9.777064918 | Up | 5.88E-09 | 1.18E-08 | AAEL002882-PA OS=Aedes aegypti GN=AAEL002882 PE=4 SV=1                                   |
| CCG012832.1 | 648  | 0 | 16   | 0.001     | 0.863167328 | 9.753496447 | Up | 8.05E-05 | 0.000133 | AAEL003547-PA OS=Aedes aegypti GN=AAEL003547 PE=4 SV=1                                   |
| CCG015311.1 | 731  | 0 | 18   | 0.001     | 0.860805721 | 9.749543856 | Up | 2.45E-05 | 4.20E-05 | Hypothetical conserved protein OS=Aedes aegypti PE=2 SV=1                                |
| CCG018230.1 | 822  | 0 | 20   | 0.001     | 0.850566345 | 9.732279961 | Up | 7.45E-06 | 1.32E-05 | AAEL001637-PA OS=Aedes aegypti GN=AAEL001637 PE=4 SV=1                                   |
| CCG002798.1 | 538  | 0 | 13   | 0.001     | 0.844716725 | 9.722323806 | Up | 0.00048  | 0.000755 | -                                                                                        |
| CCG021779.1 | 668  | 0 | 16   | 0.001     | 0.837323995 | 9.709642158 | Up | 8.05E-05 | 0.000133 | -                                                                                        |
| CCG024005.1 | 1296 | 0 | 31   | 0.001     | 0.836193349 | 9.707692758 | Up | 1.07E-08 | 2.13E-08 | Putative uncharacterized protein OS=Culex quinquefasciatus GN=CpipJ_CPIJ005433 PE=4 SV=1 |
| CCG022897.2 | 688  | 0 | 16   | 0.001     | 0.812983181 | 9.667081695 | Up | 8.05E-05 | 0.000133 | -                                                                                        |
| CCG026145.1 | 649  | 2 | 1995 | 0.1324183 | 107.4603423 | 9.664486235 | Up | 9.36E-05 | 0.000154 | AAEL009504-PA OS=Aedes aegypti GN=AAEL009504 PE=4 SV=1                                   |
| CCG012375.1 | 737  | 0 | 17   | 0.001     | 0.806364593 | 9.655288482 | Up | 4.44E-05 | 7.47E-05 | AAEL007959-PA OS=Aedes aegypti GN=AAEL007959 PE=4 SV=1                                   |



|             |      |   |      |           |             |             |    |          |          |                                                                                          |
|-------------|------|---|------|-----------|-------------|-------------|----|----------|----------|------------------------------------------------------------------------------------------|
| CCG028412.1 | 696  | 0 | 16   | 0.001     | 0.803638546 | 9.650402954 | Up | 8.05E-05 | 0.000133 | Putative uncharacterized protein OS=Culex quinquefasciatus GN=CpipJ_CPIJ000496 PE=4 SV=1 |
| CCG021703.1 | 654  | 0 | 15   | 0.001     | 0.801795339 | 9.64709022  | Up | 0.00015  | 0.000236 | AAEL010547-PA OS=Aedes aegypti GN=AAEL010547 PE=4 SV=1                                   |
| CCG017058.1 | 840  | 0 | 19   | 0.001     | 0.790722927 | 9.627028446 | Up | 1.35E-05 | 2.35E-05 | AAEL008797-PA OS=Aedes aegypti GN=AAEL008797 PE=4 SV=1                                   |
| CCG025315.1 | 905  | 0 | 20   | 0.001     | 0.772558603 | 9.593500563 | Up | 7.45E-06 | 1.32E-05 | -                                                                                        |
| CCG009511.1 | 600  | 0 | 13   | 0.001     | 0.75742933  | 9.564967478 | Up | 0.00048  | 0.000755 | AAEL001383-PA OS=Aedes aegypti GN=AAEL001383 PE=4 SV=1                                   |
| CCG025336.1 | 975  | 0 | 21   | 0.001     | 0.7529475   | 9.556405464 | Up | 4.11E-06 | 7.35E-06 | AAEL001237-PA (Fragment) OS=Aedes aegypti GN=AAEL001237 PE=4 SV=1                        |
| CCG022386.1 | 604  | 0 | 13   | 0.001     | 0.752413242 | 9.555381429 | Up | 0.00048  | 0.000755 | -                                                                                        |
| CCG007668.1 | 1260 | 0 | 27   | 0.001     | 0.749105931 | 9.549025934 | Up | 1.15E-07 | 2.21E-07 | -                                                                                        |
| CCG024471.1 | 1170 | 0 | 25   | 0.001     | 0.746971726 | 9.544909825 | Up | 3.80E-07 | 7.11E-07 | AAEL006371-PA OS=Aedes aegypti GN=AAEL006371 PE=3 SV=1                                   |
| CCG018313.1 | 1032 | 0 | 22   | 0.001     | 0.745234582 | 9.541550813 | Up | 2.26E-06 | 4.09E-06 | AAEL003984-PA OS=Aedes aegypti GN=AAEL003984 PE=4 SV=1                                   |
| CCG025596.1 | 2079 | 0 | 44   | 0.001     | 0.739857709 | 9.531104026 | Up | 4.65E-12 | 1.06E-11 | AAEL013981-PA OS=Aedes aegypti GN=AAEL013981 PE=4 SV=1                                   |
| CCG021545.1 | 1639 | 2 | 1818 | 0.0524341 | 38.77617277 | 9.530449688 | Up | 9.36E-05 | 0.000154 | AAEL002638-PA OS=Aedes aegypti GN=CYP9J6 PE=3 SV=1                                       |
| CCG018503.1 | 1089 | 0 | 23   | 0.001     | 0.738329078 | 9.528120168 | Up | 1.25E-06 | 2.29E-06 | AAEL005916-PA OS=Aedes aegypti GN=AAEL005916 PE=4 SV=1                                   |
| CCG004271.1 | 670  | 0 | 14   | 0.001     | 0.730471455 | 9.512684087 | Up | 0.00026  | 0.000423 | Gag polyprotein OS=Anopheles gambiae PE=4 SV=1                                           |
| CCG008479.1 | 1017 | 0 | 21   | 0.001     | 0.721852323 | 9.495559909 | Up | 4.11E-06 | 7.34E-06 | AAEL007070-PA OS=Aedes aegypti GN=AAEL007070 PE=3 SV=1                                   |
| CCG010484.1 | 897  | 1 | 876  | 0.0479038 | 34.13985558 | 9.477100263 | Up | 0.00059  | 0.000916 | AAEL013295-PA OS=Aedes aegypti GN=AAEL013295 PE=4 SV=1                                   |
| CCG001873.1 | 885  | 0 | 18   | 0.001     | 0.711015799 | 9.473737807 | Up | 2.45E-05 | 4.20E-05 | AAEL008197-PA OS=Aedes aegypti GN=AAEL008197 PE=3 SV=1                                   |
| CCG018585.3 | 1455 | 0 | 29   | 0.001     | 0.696762905 | 9.444524007 | Up | 3.51E-08 | 6.85E-08 | AAEL005963-PA OS=Aedes aegypti GN=CASPS15 PE=3 SV=1                                      |
| CCG023512.1 | 756  | 0 | 15   | 0.001     | 0.693616603 | 9.437994622 | Up | 0.00015  | 0.000236 | AAEL005465-PA OS=Aedes aegypti GN=AAEL005465 PE=4 SV=1                                   |
| CCG015533.1 | 909  | 0 | 18   | 0.001     | 0.692243104 | 9.435134967 | Up | 2.45E-05 | 4.20E-05 | AAEL012550-PA OS=Aedes aegypti GN=AAEL012550 PE=4 SV=1                                   |

|             |      |   |      |           |             |             |    |          |          |                                                                                          |
|-------------|------|---|------|-----------|-------------|-------------|----|----------|----------|------------------------------------------------------------------------------------------|
| CCG005480.2 | 819  | 0 | 16   | 0.001     | 0.682945578 | 9.415626809 | Up | 8.05E-05 | 0.000133 | AAEL007279-PA OS=Aedes aegypti GN=AAEL007279 PE=3 SV=1                                   |
| CCG010721.1 | 978  | 0 | 19   | 0.001     | 0.679148526 | 9.407583309 | Up | 1.35E-05 | 2.35E-05 | AAEL009463-PA (Fragment) OS=Aedes aegypti GN=AAEL009463 PE=4 SV=1                        |
| CCG003452.1 | 933  | 0 | 18   | 0.001     | 0.674436208 | 9.397538181 | Up | 2.45E-05 | 4.20E-05 | AAEL000224-PA OS=Aedes aegypti GN=AAEL000224 PE=3 SV=1                                   |
| CCG011106.1 | 2979 | 0 | 57   | 0.001     | 0.668889485 | 9.385624056 | Up | 2.22E-15 | 8.05E-15 | AAEL003766-PA OS=Aedes aegypti GN=AAEL003766 PE=4 SV=1                                   |
| CCG009507.1 | 732  | 0 | 14   | 0.001     | 0.668600922 | 9.385001534 | Up | 0.00026  | 0.000423 | AAEL014647-PA OS=Aedes aegypti GN=AAEL014647 PE=4 SV=1                                   |
| CCG000644.1 | 1263 | 0 | 24   | 0.001     | 0.664290295 | 9.375670027 | Up | 6.88E-07 | 1.27E-06 | AAEL012042-PA (Fragment) OS=Aedes aegypti GN=AAEL012042 PE=3 SV=1                        |
| CCG023752.1 | 1080 | 2 | 1631 | 0.0795736 | 52.79347168 | 9.373854271 | Up | 9.36E-05 | 0.000153 | AAEL009263-PA OS=Aedes aegypti GN=AAEL009263 PE=2 SV=1                                   |
| CCG019765.1 | 693  | 0 | 13   | 0.001     | 0.65578297  | 9.357074626 | Up | 0.00048  | 0.000755 | AAEL004751-PA OS=Aedes aegypti GN=AAEL004751 PE=4 SV=1                                   |
| CCG008302.1 | 1098 | 2 | 1605 | 0.0782691 | 51.10021331 | 9.350670786 | Up | 9.36E-05 | 0.000154 | AAEL010638-PA OS=Aedes aegypti GN=AAEL010638 PE=3 SV=1                                   |
| CCG008747.1 | 1772 | 0 | 33   | 0.001     | 0.651028856 | 9.346577681 | Up | 3.24E-09 | 6.60E-09 | Putative uncharacterized protein OS=Culex quinquefasciatus GN=CpipJ_CPIJ014613 PE=4 SV=1 |
| CCG018071.1 | 1569 | 0 | 29   | 0.001     | 0.646137684 | 9.335697808 | Up | 3.51E-08 | 6.85E-08 | AGAP001625-PA OS=Anopheles gambiae GN=AgaP_AGAP001625 PE=4 SV=5                          |
| CCG003303.1 | 1032 | 0 | 19   | 0.001     | 0.643611685 | 9.330046708 | Up | 1.35E-05 | 2.35E-05 | AAEL009977-PA OS=Aedes aegypti GN=AAEL009977 PE=4 SV=1                                   |
| CCG011354.1 | 551  | 1 | 780  | 0.077985  | 49.48721576 | 9.309643518 | Up | 0.00059  | 0.000918 | -                                                                                        |
| CCG028209.1 | 776  | 0 | 14   | 0.001     | 0.63069056  | 9.30078853  | Up | 0.00026  | 0.000423 | AAEL009165-PA OS=Aedes aegypti GN=AAEL009165 PE=4 SV=1                                   |
| CCG028277.1 | 834  | 0 | 15   | 0.001     | 0.628745985 | 9.296333472 | Up | 0.00015  | 0.000237 | AAEL006378-PA OS=Aedes aegypti GN=AAEL006378 PE=3 SV=1                                   |
| CCG000163.1 | 788  | 0 | 14   | 0.001     | 0.621086136 | 9.278649553 | Up | 0.00026  | 0.000423 | AAEL009165-PA OS=Aedes aegypti GN=AAEL009165 PE=4 SV=1                                   |
| CCG000733.1 | 794  | 0 | 14   | 0.001     | 0.616392789 | 9.267706175 | Up | 0.00026  | 0.000423 | AAEL013652-PA OS=Aedes aegypti GN=AAEL013652 PE=3 SV=1                                   |
| CCG009150.1 | 744  | 0 | 13   | 0.001     | 0.610830105 | 9.254627357 | Up | 0.00048  | 0.000755 | -                                                                                        |

|             |      |   |      |           |             |             |    |          |          |                                                                                                                           |
|-------------|------|---|------|-----------|-------------|-------------|----|----------|----------|---------------------------------------------------------------------------------------------------------------------------|
| CCG018105.1 | 900  | 2 | 1487 | 0.0954883 | 57.75884173 | 9.240502136 | Up | 9.36E-05 | 0.000153 | Putative uncharacterized protein OS=Culex quinquefasciatus GN=CpipJ_CPIJ015628 PE=4 SV=1                                  |
| CCG021535.1 | 1296 | 2 | 1476 | 0.0663113 | 39.81359299 | 9.22979021  | Up | 9.36E-05 | 0.000154 | AAEL002586-PA OS=Aedes aegypti GN=AAEL002586 PE=4 SV=1                                                                    |
| CCG028103.1 | 816  | 0 | 14   | 0.001     | 0.599774356 | 9.22827603  | Up | 0.00026  | 0.000423 | AAEL005607-PA OS=Aedes aegypti GN=AAEL005607 PE=3 SV=1                                                                    |
| CCG012066.1 | 825  | 0 | 14   | 0.001     | 0.593231363 | 9.212451063 | Up | 0.00026  | 0.000423 | AAEL012564-PA OS=Aedes aegypti GN=AAEL012564 PE=3 SV=1                                                                    |
| CCG004721.2 | 832  | 0 | 14   | 0.001     | 0.588240234 | 9.200261654 | Up | 0.00026  | 0.000423 | Putative uncharacterized protein OS=Culex quinquefasciatus GN=CpipJ_CPIJ014613 PE=4 SV=1                                  |
| CCG020709.1 | 1017 | 0 | 17   | 0.001     | 0.584356642 | 9.190705328 | Up | 4.44E-05 | 7.47E-05 | AAEL005443-PA (Fragment) OS=Aedes aegypti GN=AAEL005443 PE=4 SV=1                                                         |
| CCG015029.1 | 1044 | 0 | 17   | 0.001     | 0.56924397  | 9.152903295 | Up | 4.44E-05 | 7.47E-05 | AAEL008380-PA OS=Aedes aegypti GN=AAEL008380 PE=4 SV=1                                                                    |
| CCG022299.1 | 994  | 0 | 16   | 0.001     | 0.56270868  | 9.136244409 | Up | 8.05E-05 | 0.000133 | Putative uncharacterized protein (Fragment) OS=Harpegnathos saltator GN=EAI_06049 PE=4 SV=1                               |
| CCG010650.1 | 446  | 1 | 689  | 0.0963447 | 54.00505089 | 9.130673377 | Up | 0.00059  | 0.000917 | Chromosome undetermined SCAF14565, whole genome shotgun sequence OS=Tetraodon nigroviridis GN=GSTENG00016696001 PE=3 SV=1 |
| CCG001620.1 | 1065 | 0 | 17   | 0.001     | 0.558019441 | 9.124171576 | Up | 4.44E-05 | 7.47E-05 | AAEL004590-PA OS=Aedes aegypti GN=AAEL004590 PE=4 SV=1                                                                    |
| CCG004308.1 | 951  | 0 | 15   | 0.001     | 0.551392378 | 9.106935515 | Up | 0.00015  | 0.000237 | AAEL010140-PA OS=Aedes aegypti GN=AAEL010140 PE=3 SV=1                                                                    |
| CCG008512.1 | 1215 | 0 | 19   | 0.001     | 0.546672641 | 9.094533365 | Up | 1.35E-05 | 2.35E-05 | Putative uncharacterized protein OS=Culex quinquefasciatus GN=CpipJ_CPIJ014988 PE=3 SV=1                                  |
| CCG006009.1 | 1170 | 0 | 18   | 0.001     | 0.537819643 | 9.070978637 | Up | 2.45E-05 | 4.20E-05 | 3-demethylubiquinone-9 3-methyltransferase OS=Wolbachia pipientis wAlbB GN=ubiG PE=3 SV=1                                 |
| CCG013061.1 | 588  | 2 | 1305 | 0.1461556 | 77.58597141 | 9.052147295 | Up | 9.36E-05 | 0.000153 | AAEL008182-PA OS=Aedes aegypti GN=AAEL008182 PE=4 SV=1                                                                    |
| CCG012578.1 | 1808 | 0 | 27   | 0.001     | 0.522053912 | 9.02805499  | Up | 1.15E-07 | 2.21E-07 | AAEL001960-PA OS=Aedes aegypti GN=AAEL001960 PE=3 SV=1                                                                    |
| CCG002815.1 | 1216 | 0 | 18   | 0.001     | 0.517474492 | 9.015343938 | Up | 2.45E-05 | 4.20E-05 | -                                                                                                                         |
| CCG007077.1 | 1783 | 0 | 26   | 0.001     | 0.509767356 | 8.993695181 | Up | 2.09E-07 | 3.96E-07 | Polyprotein OS=Antheraea mylitta PE=4 SV=1                                                                                |
| CCG017233.1 | 1170 | 0 | 17   | 0.001     | 0.507940774 | 8.988516477 | Up | 4.44E-05 | 7.47E-05 | AAEL015312-PA OS=Aedes aegypti GN=AAEL015312 PE=3 SV=1                                                                    |

|             |      |   |     |           |             |             |    |          |          |                                                                                                |
|-------------|------|---|-----|-----------|-------------|-------------|----|----------|----------|------------------------------------------------------------------------------------------------|
| CCG009838.1 | 1179 | 0 | 17  | 0.001     | 0.504063363 | 8.977461288 | Up | 4.44E-05 | 7.47E-05 | FAD oxidoreductase OS=Culex quinquefasciatus<br>GN=CpipJ_CPIJ016820 PE=4 SV=1                  |
| CCG022378.1 | 1116 | 0 | 16  | 0.001     | 0.501193932 | 8.969225138 | Up | 8.05E-05 | 0.000133 | AAEL008380-PA OS=Aedes aegypti GN=AAEL008380 PE=4<br>SV=1                                      |
| CCG022315.1 | 981  | 0 | 14  | 0.001     | 0.498894877 | 8.962592046 | Up | 0.00026  | 0.000423 | Uncharacterized protein OS=Anopheles darlingi GN=AND_21982<br>PE=4 SV=1                        |
| CCG000478.1 | 1134 | 0 | 16  | 0.001     | 0.493238473 | 8.946141525 | Up | 8.05E-05 | 0.000133 | AAEL000130-PA OS=Aedes aegypti GN=AAEL000130 PE=4<br>SV=1                                      |
| CCG009214.1 | 2646 | 0 | 37  | 0.001     | 0.488834558 | 8.93320247  | Up | 3.00E-10 | 6.30E-10 | AAEL009308-PA OS=Aedes aegypti GN=AAEL009308 PE=4<br>SV=1                                      |
| CCG022990.1 | 1267 | 0 | 17  | 0.001     | 0.469053437 | 8.873608482 | Up | 4.44E-05 | 7.47E-05 | Endonuclease-reverse transcriptase OS=Bombyx mori PE=4<br>SV=1                                 |
| CCG025268.1 | 972  | 0 | 13  | 0.001     | 0.467548969 | 8.868973665 | Up | 0.00048  | 0.000756 | AAEL007999-PA OS=Aedes aegypti GN=AAEL007999 PE=4<br>SV=1                                      |
| CCG021767.1 | 1050 | 0 | 14  | 0.001     | 0.466110357 | 8.86452776  | Up | 0.00026  | 0.000423 | Putative uncharacterized protein (Fragment) OS=Camponotus<br>floridanus GN=EAG_00896 PE=4 SV=1 |
| CCG001859.1 | 1434 | 0 | 19  | 0.001     | 0.463184978 | 8.855444655 | Up | 1.35E-05 | 2.35E-05 | Putative uncharacterized protein OS=Culex quinquefasciatus<br>GN=CpipJ_CPIJ017585 PE=4 SV=1    |
| CCG006963.1 | 1908 | 0 | 25  | 0.001     | 0.4580487   | 8.839357184 | Up | 3.80E-07 | 7.11E-07 | AAEL006375-PA OS=Aedes aegypti GN=AAEL006375 PE=4<br>SV=1                                      |
| CCG020738.1 | 846  | 1 | 562 | 0.0507916 | 23.22287417 | 8.836739524 | Up | 0.00059  | 0.000918 | AAEL010318-PA OS=Aedes aegypti GN=AAEL010318 PE=2<br>SV=1                                      |
| CCG010527.1 | 1308 | 0 | 17  | 0.001     | 0.454350692 | 8.827662466 | Up | 4.44E-05 | 7.48E-05 | AGAP000437-PA OS=Anopheles gambiae<br>GN=AgaP_AGAP000437 PE=4 SV=5                             |
| CCG024753.1 | 981  | 1 | 558 | 0.043802  | 19.8845244  | 8.826434516 | Up | 0.00059  | 0.000918 | AAEL006884-PA OS=Aedes aegypti GN=AAEL006884 PE=4<br>SV=1                                      |
| CCG010649.1 | 464  | 1 | 553 | 0.0926072 | 41.66363589 | 8.813448874 | Up | 0.00059  | 0.000916 | Histone H2A OS=Gasterosteus aculeatus PE=3 SV=1                                                |
| CCG003766.1 | 1254 | 0 | 16  | 0.001     | 0.446038619 | 8.801024817 | Up | 8.05E-05 | 0.000133 | AAEL001160-PA OS=Aedes aegypti GN=AAEL001160 PE=4<br>SV=1                                      |
| CCG011758.1 | 1188 | 0 | 15  | 0.001     | 0.441392383 | 8.785917925 | Up | 0.00015  | 0.000236 | Odorant receptor 2 OS=Aedes albopictus PE=2 SV=1                                               |
| CCG003137.1 | 1032 | 0 | 13  | 0.001     | 0.44036589  | 8.782558913 | Up | 0.00048  | 0.000756 | AAEL015565-PA OS=Aedes aegypti GN=AAEL015565 PE=4<br>SV=1                                      |
| CCG016924.1 | 1494 | 0 | 18  | 0.001     | 0.421184057 | 8.718307019 | Up | 2.45E-05 | 4.20E-05 | AAEL002671-PA OS=Aedes aegypti GN=AAEL002671 PE=4<br>SV=1                                      |
| CCG005674.1 | 1344 | 0 | 16  | 0.001     | 0.416169962 | 8.701029027 | Up | 8.05E-05 | 0.000133 | -                                                                                              |

|             |      |   |     |           |             |             |    |          |          |                                                                                                                           |
|-------------|------|---|-----|-----------|-------------|-------------|----|----------|----------|---------------------------------------------------------------------------------------------------------------------------|
| CCG015525.1 | 1938 | 0 | 23  | 0.001     | 0.41488151  | 8.696555551 | Up | 1.25E-06 | 2.29E-06 | AAEL004028-PA OS=Aedes aegypti GN=AAEL004028 PE=3 SV=1                                                                    |
| CCG009271.1 | 1686 | 0 | 20  | 0.001     | 0.41468893  | 8.695885724 | Up | 7.45E-06 | 1.32E-05 | AAEL003201-PA (Fragment) OS=Aedes aegypti GN=AAEL003201 PE=4 SV=1                                                         |
| CCG002292.1 | 2073 | 0 | 24  | 0.001     | 0.404726793 | 8.66080455  | Up | 6.88E-07 | 1.27E-06 | AAEL015078-PA OS=Aedes aegypti GN=AAEL015078 PE=4 SV=1                                                                    |
| CCG021419.1 | 1152 | 0 | 13  | 0.001     | 0.394494443 | 8.623861167 | Up | 0.00048  | 0.000756 | AAEL010973-PA OS=Aedes aegypti GN=AAEL010973 PE=4 SV=1                                                                    |
| CCG027564.1 | 2505 | 0 | 28  | 0.001     | 0.390751197 | 8.610106484 | Up | 6.36E-08 | 1.23E-07 | Protein translocase subunit SecA OS=Wolbachia endosymbiont of Muscidifurax uniraptor GN=secA PE=3 SV=1                    |
| CCG003429.1 | 1257 | 0 | 14  | 0.001     | 0.389352327 | 8.604932438 | Up | 0.00026  | 0.000423 | AAEL009473-PA OS=Aedes aegypti GN=AAEL009473 PE=4 SV=1                                                                    |
| CCG019144.1 | 1170 | 0 | 13  | 0.001     | 0.388425297 | 8.601493354 | Up | 0.00048  | 0.000756 | AAEL006371-PA OS=Aedes aegypti GN=AAEL006371 PE=3 SV=1                                                                    |
| CCG013602.1 | 1854 | 0 | 20  | 0.001     | 0.377111939 | 8.558849016 | Up | 7.45E-06 | 1.32E-05 | AAEL000603-PA (Fragment) OS=Aedes aegypti GN=AAEL000603 PE=4 SV=1                                                         |
| CCG023831.1 | 1686 | 0 | 18  | 0.001     | 0.373220037 | 8.543882631 | Up | 2.45E-05 | 4.20E-05 | AAEL003201-PA (Fragment) OS=Aedes aegypti GN=AAEL003201 PE=4 SV=1                                                         |
| CCG026474.1 | 362  | 2 | 874 | 0.2374018 | 84.40202735 | 8.473802673 | Up | 9.36E-05 | 0.000153 | Histone H2A OS=Drosophila willistoni GN=GK10379 PE=3 SV=1                                                                 |
| CCG021055.1 | 1398 | 0 | 14  | 0.001     | 0.350082886 | 8.451552727 | Up | 0.00026  | 0.000423 | Putative uncharacterized protein (Fragment) OS=Solenopsis invicta GN=SINV_08164 PE=4 SV=1                                 |
| CCG014381.1 | 1608 | 0 | 16  | 0.001     | 0.34784355  | 8.442294759 | Up | 8.05E-05 | 0.000133 | AAEL006875-PA OS=Aedes aegypti GN=CYP307B1_a PE=3 SV=1                                                                    |
| CCG011353.1 | 736  | 2 | 849 | 0.1167656 | 40.3255122  | 8.431933947 | Up | 9.36E-05 | 0.000154 | -                                                                                                                         |
| CCG009728.1 | 4575 | 0 | 44  | 0.001     | 0.336210749 | 8.393222041 | Up | 4.65E-12 | 1.06E-11 | AAEL000067-PA OS=Aedes aegypti GN=AAEL000067 PE=4 SV=1                                                                    |
| CCG000380.1 | 1176 | 2 | 808 | 0.0730778 | 24.01895207 | 8.360524687 | Up | 9.36E-05 | 0.000153 | AAEL005606-PA OS=Aedes aegypti GN=AAEL005606 PE=4 SV=1                                                                    |
| CCG027428.1 | 1491 | 0 | 14  | 0.001     | 0.32824673  | 8.35863683  | Up | 0.00026  | 0.000423 | AAEL005151-PA OS=Aedes aegypti GN=AAEL005151 PE=4 SV=1                                                                    |
| CCG024624.1 | 398  | 1 | 402 | 0.1079642 | 35.30961624 | 8.353364895 | Up | 0.00059  | 0.000915 | Chromosome undetermined SCAF14565, whole genome shotgun sequence OS=Tetraodon nigroviridis GN=GSTENG00016696001 PE=3 SV=1 |
| CCG018391.1 | 777  | 2 | 800 | 0.1106042 | 35.99307776 | 8.346169394 | Up | 9.36E-05 | 0.000153 | -                                                                                                                         |

|             |      |   |     |           |             |             |    |          |          |                                                                                               |
|-------------|------|---|-----|-----------|-------------|-------------|----|----------|----------|-----------------------------------------------------------------------------------------------|
| CCG023244.1 | 1533 | 0 | 14  | 0.001     | 0.319253669 | 8.318559391 | Up | 0.00026  | 0.000423 | AAEL007377-PA OS=Aedes aegypti GN=AAEL007377 PE=4 SV=1                                        |
| CCG016125.1 | 1170 | 2 | 775 | 0.0734525 | 23.1561235  | 8.300365704 | Up | 9.36E-05 | 0.000154 | AAEL006726-PA OS=Aedes aegypti GN=AAEL006726 PE=4 SV=1                                        |
| CCG010902.1 | 4749 | 0 | 42  | 0.001     | 0.309169851 | 8.272255832 | Up | 1.53E-11 | 3.37E-11 | AAEL008384-PA OS=Aedes aegypti GN=AAEL008384 PE=3 SV=1                                        |
| CCG009856.1 | 1179 | 2 | 760 | 0.0728918 | 22.53459741 | 8.272168812 | Up | 9.36E-05 | 0.000154 | AAEL012453-PA OS=Aedes aegypti GN=AAEL012453 PE=4 SV=1                                        |
| CCG019130.1 | 734  | 1 | 378 | 0.0585419 | 18.00303627 | 8.264555628 | Up | 0.00059  | 0.000916 | AAEL009973-PA OS=Aedes aegypti GN=AAEL009973 PE=4 SV=1                                        |
| CCG016477.1 | 489  | 1 | 377 | 0.0878727 | 26.95147309 | 8.260733917 | Up | 0.00059  | 0.000916 | AAEL013262-PA OS=Aedes aegypti GN=AAEL013262 PE=4 SV=1                                        |
| CCG025364.1 | 1593 | 0 | 13  | 0.001     | 0.285284117 | 8.156255617 | Up | 0.00048  | 0.000755 | AAEL009243-PA OS=Aedes aegypti GN=AAEL009243 PE=3 SV=1                                        |
| CCG017133.1 | 1329 | 2 | 699 | 0.0646648 | 18.38663316 | 8.151461849 | Up | 9.36E-05 | 0.000153 | AAEL009987-PA OS=Aedes aegypti GN=AAEL009987 PE=4 SV=1                                        |
| CCG011001.1 | 1617 | 0 | 13  | 0.001     | 0.281049844 | 8.134682205 | Up | 0.00048  | 0.000755 | Putative uncharacterized protein GLEAN_15470 OS=Tribolium castaneum GN=GLEAN_15470 PE=4 SV=1  |
| CCG027607.1 | 1902 | 0 | 15  | 0.001     | 0.275696189 | 8.106935515 | Up | 0.00015  | 0.000236 | Threonine--tRNA ligase OS=Wolbachia pipientis wAlbB GN=thrS PE=3 SV=1                         |
| CCG027695.1 | 506  | 2 | 657 | 0.1698408 | 45.3904898  | 8.062062764 | Up | 9.36E-05 | 0.000153 | Predicted protein OS=Nematostella vectensis GN=v1g229551 PE=3 SV=1                            |
| CCG021312.1 | 1662 | 2 | 646 | 0.0517085 | 13.58787412 | 8.037703559 | Up | 9.36E-05 | 0.000153 | AAEL000889-PA (Fragment) OS=Aedes aegypti GN=AAEL000889 PE=4 SV=2                             |
| CCG005939.1 | 701  | 2 | 614 | 0.1225955 | 30.6196604  | 7.964408049 | Up | 9.36E-05 | 0.000154 | -                                                                                             |
| CCG011776.1 | 2614 | 0 | 18  | 0.001     | 0.24072264  | 7.911228026 | Up | 2.45E-05 | 4.20E-05 | RNase H and integrase-like protein (Fragment) OS=Bombyx mori GN=P-1 PE=4 SV=1                 |
| CCG004419.1 | 1046 | 2 | 590 | 0.0821601 | 19.71833967 | 7.906884348 | Up | 9.36E-05 | 0.000153 | Similar to Aedes aegypti 34 kDa salivary secreted protein 34k-2 OS=Aedes albopictus PE=2 SV=1 |
| CCG027500.1 | 1100 | 1 | 295 | 0.0390634 | 9.375174225 | 7.906884348 | Up | 0.00059  | 0.000917 | AAEL002875-PA OS=Aedes aegypti GN=AAEL002875 PE=4 SV=1                                        |
| CCG004788.1 | 1896 | 0 | 13  | 0.001     | 0.239692826 | 7.905042919 | Up | 0.00048  | 0.000756 | -                                                                                             |
| CCG013769.1 | 852  | 1 | 288 | 0.050434  | 11.81688229 | 7.872238205 | Up | 0.00059  | 0.000919 | Putative salivary mucin OS=Aedes albopictus PE=2 SV=1                                         |
| CCG018500.1 | 742  | 2 | 573 | 0.1158214 | 26.99608166 | 7.864704533 | Up | 9.36E-05 | 0.000154 | AAEL005916-PA OS=Aedes aegypti GN=AAEL005916 PE=4 SV=1                                        |

|             |      |   |     |           |             |             |    |          |          |                                                                                                                           |
|-------------|------|---|-----|-----------|-------------|-------------|----|----------|----------|---------------------------------------------------------------------------------------------------------------------------|
| CCG014537.1 | 563  | 2 | 541 | 0.1526456 | 33.59223399 | 7.781797988 | Up | 9.36E-05 | 0.000153 | Histone H2B OS=Aedes aegypti GN=AAEL015674 PE=3 SV=1                                                                      |
| CCG010648.1 | 425  | 1 | 260 | 0.1011053 | 21.38623991 | 7.724681017 | Up | 0.00059  | 0.000919 | Histone H2B OS=Aedes aegypti GN=AAEL015674 PE=3 SV=1                                                                      |
| CCG006770.1 | 2919 | 0 | 17  | 0.001     | 0.203593938 | 7.669550796 | Up | 4.44E-05 | 7.47E-05 | AAEL005942-PA OS=Aedes aegypti GN=AAEL005942 PE=4 SV=1                                                                    |
| CCG018777.1 | 1083 | 1 | 250 | 0.0396766 | 8.069777648 | 7.668097488 | Up | 0.00059  | 0.000917 | Arginine N-methyltransferase 1 OS=Culex quinquefasciatus GN=CpipJ_CPIJ003726 PE=4 SV=1                                    |
| CCG010863.1 | 729  | 2 | 474 | 0.1178868 | 22.73007296 | 7.591056453 | Up | 9.36E-05 | 0.000154 | NOS protein OS=Aedes aegypti GN=nos PE=2 SV=1                                                                             |
| CCG015658.1 | 1857 | 1 | 227 | 0.0231393 | 4.273305777 | 7.528861691 | Up | 0.00059  | 0.000916 | AAEL013916-PA OS=Aedes aegypti GN=AAEL013916 PE=4 SV=1                                                                    |
| CCG013426.1 | 729  | 2 | 430 | 0.1178868 | 20.62010838 | 7.450506053 | Up | 9.36E-05 | 0.000154 | AAEL014276-PA OS=Aedes aegypti GN=AAEL014276 PE=4 SV=1                                                                    |
| CCG006699.1 | 4227 | 0 | 21  | 0.001     | 0.173674902 | 7.440245476 | Up | 4.11E-06 | 7.35E-06 | AAEL002654-PA OS=Aedes aegypti GN=AAEL002654 PE=4 SV=1                                                                    |
| CCG004528.1 | 828  | 1 | 211 | 0.0518958 | 8.908449757 | 7.423412393 | Up | 0.00059  | 0.000916 | AAEL001690-PA OS=Aedes aegypti GN=AAEL001690 PE=3 SV=1                                                                    |
| CCG006667.1 | 2652 | 0 | 13  | 0.001     | 0.171364102 | 7.420921108 | Up | 0.00048  | 0.000755 | Uncharacterized protein OS=Anopheles darlingi GN=AND_19618 PE=4 SV=1                                                      |
| CCG024178.1 | 1245 | 2 | 403 | 0.0690277 | 11.31581168 | 7.356949232 | Up | 9.36E-05 | 0.000153 | AAEL015402-PA OS=Aedes aegypti GN=AAEL015402 PE=4 SV=1                                                                    |
| CCG007445.1 | 2793 | 0 | 13  | 0.001     | 0.162713068 | 7.34618631  | Up | 0.00048  | 0.000755 | AAEL006287-PA OS=Aedes aegypti GN=PIWI7 PE=4 SV=1                                                                         |
| CCG010647.1 | 389  | 2 | 396 | 0.2209241 | 35.58734602 | 7.331669824 | Up | 9.36E-05 | 0.000154 | Chromosome undetermined SCAF14565, whole genome shotgun sequence OS=Tetraodon nigroviridis GN=GSTENG00016696001 PE=3 SV=1 |
| CCG014759.1 | 852  | 1 | 197 | 0.050434  | 8.083075733 | 7.324365023 | Up | 0.00059  | 0.000918 | AAEL002647-PA OS=Aedes aegypti GN=AAEL002647 PE=4 SV=1                                                                    |
| CCG005147.1 | 1662 | 1 | 186 | 0.0258542 | 3.912298123 | 7.241472015 | Up | 0.00059  | 0.000918 | AAEL006333-PA OS=Aedes aegypti GN=AAEL006333 PE=3 SV=1                                                                    |
| CCG011089.1 | 1107 | 1 | 186 | 0.0388164 | 5.873748401 | 7.241472015 | Up | 0.00059  | 0.000916 | FXa-directed anticoagulant OS=Aedes albopictus PE=2 SV=1                                                                  |
| CCG023564.1 | 614  | 2 | 367 | 0.1399666 | 20.89525664 | 7.221949457 | Up | 9.36E-05 | 0.000153 | GK23465 OS=Drosophila willistoni GN=GK23465 PE=4 SV=1                                                                     |
| CCG018505.1 | 1143 | 2 | 357 | 0.0751876 | 10.91872687 | 7.182093468 | Up | 9.36E-05 | 0.000154 | AAEL005938-PA OS=Aedes aegypti GN=AAEL005938 PE=4 SV=1                                                                    |
| CCG003975.1 | 396  | 1 | 170 | 0.1085094 | 15.00734104 | 7.11170414  | Up | 0.00059  | 0.000917 | -                                                                                                                         |
| CCG017353.1 | 270  | 1 | 168 | 0.1591472 | 21.75181666 | 7.094630627 | Up | 0.00059  | 0.000918 | AAEL000323-PA OS=Aedes aegypti GN=AAEL000323 PE=4 SV=1                                                                    |

|             |      |   |     |           |             |             |    |          |          |                                                                                                                                                |
|-------------|------|---|-----|-----------|-------------|-------------|----|----------|----------|------------------------------------------------------------------------------------------------------------------------------------------------|
| CCG011996.1 | 1068 | 1 | 167 | 0.0402338 | 5.466322304 | 7.086017496 | Up | 0.00059  | 0.000918 | AAEL008570-PA OS=Aedes aegypti GN=AAEL008570 PE=3 SV=1                                                                                         |
| CCG010906.1 | 417  | 2 | 313 | 0.2060899 | 26.23966578 | 6.992332051 | Up | 9.36E-05 | 0.000154 | Histone H2B OS=Aedes aegypti GN=AAEL015674 PE=3 SV=1                                                                                           |
| CCG019377.1 | 954  | 2 | 310 | 0.0900833 | 11.35960776 | 6.978437609 | Up | 9.36E-05 | 0.000154 | AAEL006643-PA OS=Aedes aegypti GN=AAEL006643 PE=4 SV=1                                                                                         |
| CCG002658.1 | 768  | 2 | 275 | 0.1119004 | 12.51761213 | 6.805601012 | Up | 9.36E-05 | 0.000154 | AAEL009491-PA OS=Aedes aegypti GN=AAEL009491 PE=4 SV=1                                                                                         |
| CCG019440.1 | 1344 | 1 | 132 | 0.0319715 | 3.433402183 | 6.746707323 | Up | 0.00059  | 0.000917 | AAEL008449-PA OS=Aedes aegypti GN=AAEL008449 PE=4 SV=1                                                                                         |
| CCG011546.1 | 324  | 1 | 130 | 0.1326226 | 14.02646908 | 6.724681017 | Up | 0.00059  | 0.000917 | -                                                                                                                                              |
| CCG024710.1 | 1515 | 2 | 245 | 0.0567257 | 5.653318686 | 6.638951143 | Up | 9.36E-05 | 0.000154 | AAEL002671-PA OS=Aedes aegypti GN=AAEL002671 PE=4 SV=1                                                                                         |
| CCG000646.1 | 870  | 1 | 119 | 0.0493905 | 4.781649352 | 6.597130967 | Up | 0.00059  | 0.000916 | Putative secreted protein OS=Aedes aegypti PE=2 SV=1                                                                                           |
| CCG002191.1 | 261  | 2 | 237 | 0.32927   | 31.74372259 | 6.591056453 | Up | 9.36E-05 | 0.000154 | AAEL012504-PA OS=Aedes aegypti GN=AAEL012504 PE=4 SV=1                                                                                         |
| CCG008526.1 | 483  | 1 | 114 | 0.0889643 | 8.251021847 | 6.535203218 | Up | 0.00059  | 0.000916 | Uncharacterized protein OS=Anopheles darlingi GN=AND_17523 PE=4 SV=1                                                                           |
| CCG006107.1 | 643  | 1 | 114 | 0.066827  | 6.197890439 | 6.535203218 | Up | 0.00059  | 0.000917 | -                                                                                                                                              |
| CCG001064.1 | 822  | 1 | 108 | 0.0522746 | 4.593058262 | 6.457200706 | Up | 0.00059  | 0.000919 | Uncharacterized protein OS=Tetrapisispora phaffii (strain ATCC 24235 / CBS 4417 / NBRC 1672 / NRRL Y-8282 / UCD 70-5) GN=TPHA0B00750 PE=4 SV=1 |
| CCG012108.1 | 372  | 2 | 192 | 0.2310201 | 18.04298156 | 6.287275705 | Up | 9.36E-05 | 0.000153 | AGAP006823-PA OS=Anopheles gambiae GN=AGAP006823 PE=4 SV=1                                                                                     |
| CCG000295.1 | 768  | 1 | 96  | 0.0559502 | 4.369784597 | 6.287275705 | Up | 0.00059  | 0.000917 | AAEL004467-PA OS=Aedes aegypti GN=AAEL004467 PE=2 SV=1                                                                                         |
| CCG002691.1 | 593  | 2 | 190 | 0.1449232 | 11.20079694 | 6.272168812 | Up | 9.36E-05 | 0.000154 | -                                                                                                                                              |
| CCG000500.1 | 723  | 2 | 180 | 0.1188651 | 8.70330542  | 6.1941663   | Up | 9.36E-05 | 0.000154 | AAEL003987-PA OS=Aedes aegypti GN=AAEL003987 PE=4 SV=1                                                                                         |
| CCG026159.1 | 753  | 2 | 175 | 0.1141294 | 8.124433513 | 6.153524316 | Up | 9.36E-05 | 0.000153 | AAEL015464-PA OS=Aedes aegypti GN=AAEL015464 PE=3 SV=1                                                                                         |
| CCG010749.1 | 1725 | 2 | 175 | 0.04982   | 3.546491846 | 6.153524316 | Up | 9.36E-05 | 0.000154 | Putative salivary secreted protein 62k-3 OS=Aedes albopictus PE=2 SV=1                                                                         |
| CCG008249.1 | 426  | 2 | 173 | 0.2017358 | 14.19667108 | 6.136941431 | Up | 9.36E-05 | 0.000153 | -                                                                                                                                              |
| CCG024075.1 | 279  | 2 | 170 | 0.3080268 | 21.30074212 | 6.11170414  | Up | 9.36E-05 | 0.000153 | -                                                                                                                                              |



|             |      |   |     |           |             |             |    |          |          |                                                                                          |
|-------------|------|---|-----|-----------|-------------|-------------|----|----------|----------|------------------------------------------------------------------------------------------|
| CCG026009.1 | 294  | 1 | 83  | 0.1461556 | 9.869173374 | 6.077352635 | Up | 0.00059  | 0.000918 | Putative 8 kDa secreted peptide 8kD-2 OS=Aedes albopictus PE=4 SV=1                      |
| CCG007962.1 | 2772 | 2 | 162 | 0.0310027 | 2.043016175 | 6.042163207 | Up | 9.36E-05 | 0.000154 | AAEL009308-PA OS=Aedes aegypti GN=AAEL009308 PE=4 SV=1                                   |
| CCG004424.1 | 948  | 2 | 162 | 0.0906534 | 5.97388274  | 6.042163207 | Up | 9.36E-05 | 0.000154 | Putative salivary protein 34k-1 OS=Aedes albopictus PE=2 SV=1                            |
| CCG019835.1 | 810  | 1 | 81  | 0.0530491 | 3.495827677 | 6.042163207 | Up | 0.00059  | 0.000918 | Putative uncharacterized protein OS=Culex quinquefasciatus GN=CpipJ_CPIJ014520 PE=3 SV=1 |
| CCG018430.1 | 402  | 1 | 80  | 0.1068899 | 6.956870999 | 6.024241299 | Up | 0.00059  | 0.000917 | AAEL006551-PA OS=Aedes aegypti GN=AAEL006551 PE=4 SV=1                                   |
| CCG012830.1 | 1298 | 1 | 79  | 0.0331046 | 2.127660913 | 6.006093952 | Up | 0.00059  | 0.000916 | AAEL003526-PA OS=Aedes aegypti GN=AAEL003526 PE=4 SV=1                                   |
| CCG025978.1 | 264  | 2 | 156 | 0.3255283 | 20.65716355 | 5.987715423 | Up | 9.36E-05 | 0.000154 | -                                                                                        |
| CCG004373.1 | 885  | 2 | 153 | 0.0971067 | 6.043634289 | 5.959701047 | Up | 9.36E-05 | 0.000154 | -                                                                                        |
| CCG014082.1 | 1114 | 2 | 149 | 0.0771449 | 4.67574797  | 5.921481724 | Up | 9.36E-05 | 0.000154 | AAEL004775-PA OS=Aedes aegypti GN=AAEL004775 PE=4 SV=1                                   |
| CCG015710.1 | 297  | 2 | 147 | 0.2893585 | 17.30258143 | 5.901985549 | Up | 9.36E-05 | 0.000154 | AAEL007013-PA OS=Aedes aegypti GN=AAEL007013 PE=4 SV=1                                   |
| CCG006920.1 | 474  | 2 | 146 | 0.1813069 | 10.76773926 | 5.892137763 | Up | 9.36E-05 | 0.000154 | AAEL004436-PA OS=Aedes aegypti GN=AAEL004436 PE=4 SV=1                                   |
| CCG028497.1 | 918  | 1 | 69  | 0.046808  | 2.627582895 | 5.810837661 | Up | 0.00059  | 0.000917 | AAEL012339-PA OS=Aedes aegypti GN=AAEL012339 PE=4 SV=1                                   |
| CCG008860.1 | 882  | 2 | 137 | 0.097437  | 5.430027118 | 5.800345287 | Up | 9.36E-05 | 0.000154 | Pyrroline-5-carboxylate reductase OS=Aedes aegypti GN=P5CR-1 PE=2 SV=1                   |
| CCG008244.1 | 1260 | 2 | 134 | 0.0682059 | 3.71778499  | 5.768402394 | Up | 9.36E-05 | 0.000154 | Putative salivary serpin OS=Aedes albopictus PE=2 SV=1                                   |
| CCG006003.1 | 945  | 1 | 67  | 0.0454706 | 2.478523327 | 5.768402394 | Up | 0.00059  | 0.000918 | -                                                                                        |
| CCG017929.1 | 693  | 1 | 67  | 0.0620054 | 3.379804536 | 5.768402394 | Up | 0.00059  | 0.000918 | Putative uncharacterized protein OS=Culex quinquefasciatus GN=CpipJ_CPIJ008409 PE=4 SV=1 |
| CCG008173.1 | 3822 | 2 | 133 | 0.0224855 | 1.216496811 | 5.757595639 | Up | 9.36E-05 | 0.000154 | AAEL002094-PA OS=Aedes aegypti GN=AAEL002094 PE=4 SV=1                                   |
| CCG002319.1 | 894  | 2 | 133 | 0.0961292 | 5.200727976 | 5.757595639 | Up | 9.36E-05 | 0.000154 | AGAP005746-PA OS=Anopheles gambiae GN=AGAP005746 PE=4 SV=3                               |
| CCG020527.1 | 414  | 2 | 128 | 0.2075833 | 10.8083561  | 5.702313204 | Up | 9.36E-05 | 0.000153 | -                                                                                        |
| CCG014538.1 | 846  | 1 | 64  | 0.0507916 | 2.64459777  | 5.702313204 | Up | 0.00059  | 0.000916 | AAEL006359-PA OS=Aedes aegypti GN=AAEL006359 PE=4 SV=1                                   |

|             |      |   |     |           |             |             |    |          |          |                                                                                       |
|-------------|------|---|-----|-----------|-------------|-------------|----|----------|----------|---------------------------------------------------------------------------------------|
| CCG009804.1 | 873  | 1 | 64  | 0.0492208 | 2.562806086 | 5.702313204 | Up | 0.00059  | 0.000917 | AAEL005972-PA OS=Aedes aegypti GN=AAEL005972 PE=4 SV=1                                |
| CCG021075.1 | 453  | 1 | 61  | 0.0948559 | 4.707405923 | 5.633050541 | Up | 0.00059  | 0.000916 | -                                                                                     |
| CCG025780.1 | 1164 | 1 | 58  | 0.0369156 | 1.741907262 | 5.560294199 | Up | 0.00059  | 0.000916 | AAEL000130-PA OS=Aedes aegypti GN=AAEL000130 PE=4 SV=1                                |
| CCG019655.1 | 1536 | 2 | 115 | 0.0559502 | 2.617318899 | 5.547803255 | Up | 9.36E-05 | 0.000154 | AAEL002743-PA OS=Aedes aegypti GN=AAEL002743 PE=4 SV=1                                |
| CCG005446.1 | 750  | 1 | 57  | 0.057293  | 2.656829035 | 5.535203218 | Up | 0.00059  | 0.000917 | AAEL002960-PA OS=Aedes aegypti GN=AAEL002960 PE=4 SV=1                                |
| CCG015978.1 | 705  | 2 | 112 | 0.1219    | 5.553655317 | 5.509668126 | Up | 9.36E-05 | 0.000154 | AAEL003906-PA OS=Aedes aegypti GN=AAEL003906 PE=4 SV=1                                |
| CCG018104.1 | 468  | 1 | 54  | 0.0918157 | 4.03364732  | 5.457200706 | Up | 0.00059  | 0.000918 | AAEL009493-PA OS=Aedes aegypti GN=AAEL009493 PE=4 SV=1                                |
| CCG005014.1 | 790  | 1 | 53  | 0.0543921 | 2.345302113 | 5.430233658 | Up | 0.00059  | 0.000918 | -                                                                                     |
| CCG018637.1 | 675  | 2 | 104 | 0.1273177 | 5.386164125 | 5.402752922 | Up | 9.36E-05 | 0.000154 | -                                                                                     |
| CCG015182.1 | 1257 | 2 | 100 | 0.0683687 | 2.781088049 | 5.346169394 | Up | 9.36E-05 | 0.000154 | AAEL000429-PA OS=Aedes aegypti GN=AAEL000429 PE=4 SV=1                                |
| CCG020531.1 | 582  | 1 | 50  | 0.0738312 | 3.003288382 | 5.346169394 | Up | 0.00059  | 0.000916 | AGAP004106-PA OS=Anopheles gambiae GN=AgaP_AGAP004106 PE=4 SV=5                       |
| CCG018339.1 | 945  | 1 | 50  | 0.0454706 | 1.849644274 | 5.346169394 | Up | 0.00059  | 0.000915 | Putative uncharacterized protein OS=Tribolium castaneum GN=TcasGA2_TC004194 PE=4 SV=1 |
| CCG027277.1 | 576  | 1 | 50  | 0.0746002 | 3.034572636 | 5.346169394 | Up | 0.00059  | 0.000918 | AAEL004355-PA OS=Aedes aegypti GN=AAEL004355 PE=4 SV=1                                |
| CCG025877.1 | 486  | 2 | 98  | 0.1768302 | 7.049199843 | 5.317023048 | Up | 9.36E-05 | 0.000153 | AAEL009296-PA OS=Aedes aegypti GN=AAEL009296 PE=4 SV=1                                |
| CCG025157.1 | 633  | 2 | 98  | 0.1357654 | 5.41218187  | 5.317023048 | Up | 9.36E-05 | 0.000154 | AGAP010064-PA OS=Anopheles gambiae GN=AGAP010064 PE=4 SV=1                            |
| CCG018724.1 | 1524 | 1 | 48  | 0.0281954 | 1.101048087 | 5.287275705 | Up | 0.00059  | 0.000916 | AAEL004975-PA OS=Aedes aegypti GN=AAEL004975 PE=4 SV=1                                |
| CCG027550.2 | 888  | 2 | 95  | 0.0967787 | 3.739905736 | 5.272168812 | Up | 9.36E-05 | 0.000153 | AAEL008084-PA OS=Aedes aegypti GN=AAEL008084 PE=4 SV=1                                |
| CCG020853.1 | 972  | 2 | 95  | 0.0884151 | 3.416704006 | 5.272168812 | Up | 9.36E-05 | 0.000154 | AAEL009134-PA (Fragment) OS=Aedes aegypti GN=AAEL009134 PE=4 SV=1                     |
| CCG004626.1 | 1344 | 1 | 46  | 0.0319715 | 1.19648864  | 5.22587516  | Up | 0.00059  | 0.000917 | AAEL008449-PA OS=Aedes aegypti GN=AAEL008449 PE=4 SV=1                                |

|             |      |   |    |           |             |             |    |          |          |                                                                                          |
|-------------|------|---|----|-----------|-------------|-------------|----|----------|----------|------------------------------------------------------------------------------------------|
| CCG019520.1 | 1239 | 2 | 88 | 0.069362  | 2.482912313 | 5.161744822 | Up | 9.36E-05 | 0.000153 | -                                                                                        |
| CCG005063.1 | 1096 | 1 | 44 | 0.039206  | 1.403434469 | 5.161744822 | Up | 0.00059  | 0.000917 | -                                                                                        |
| CCG002818.1 | 709  | 1 | 43 | 0.0606061 | 2.120177576 | 5.128577959 | Up | 0.00059  | 0.000916 | -                                                                                        |
| CCG019318.1 | 471  | 1 | 43 | 0.0912309 | 3.19151996  | 5.128577959 | Up | 0.00059  | 0.000917 | AAEL006670-PA OS=Aedes aegypti GN=AAEL006670 PE=4 SV=1                                   |
| CCG011361.1 | 1464 | 1 | 43 | 0.0293509 | 1.026779987 | 5.128577959 | Up | 0.00059  | 0.000918 | AAEL004206-PA OS=Aedes aegypti GN=AAEL004206 PE=4 SV=1                                   |
| CCG020265.1 | 336  | 1 | 42 | 0.1278861 | 4.369784597 | 5.094630627 | Up | 0.00059  | 0.000918 | -                                                                                        |
| CCG005309.1 | 342  | 2 | 78 | 0.251285  | 7.972940316 | 4.987715423 | Up | 9.36E-05 | 0.000154 | -                                                                                        |
| CCG004888.2 | 1446 | 1 | 39 | 0.0297163 | 0.942858087 | 4.987715423 | Up | 0.00059  | 0.000915 | AAEL012230-PA OS=Aedes aegypti GN=AAEL012230 PE=4 SV=1                                   |
| CCG011919.1 | 7555 | 2 | 77 | 0.0113752 | 0.356292166 | 4.969099745 | Up | 9.36E-05 | 0.000153 | -                                                                                        |
| CCG026407.1 | 1280 | 1 | 38 | 0.0335701 | 1.037823842 | 4.950240717 | Up | 0.00059  | 0.000915 | -                                                                                        |
| CCG014487.1 | 354  | 2 | 75 | 0.2427669 | 7.40641457  | 4.931131894 | Up | 9.36E-05 | 0.000154 | Putative uncharacterized protein OS=Culex quinquefasciatus GN=CpipJ_CPIJ005832 PE=4 SV=1 |
| CCG014411.1 | 810  | 2 | 75 | 0.1060981 | 3.236877479 | 4.931131894 | Up | 9.36E-05 | 0.000153 | Uncharacterized protein OS=Anopheles darlingi GN=AND_21799 PE=4 SV=1                     |
| CCG028235.1 | 567  | 2 | 74 | 0.1515687 | 4.562455875 | 4.911766569 | Up | 9.36E-05 | 0.000154 | AAEL007039-PA OS=Aedes aegypti GN=PGRPS5_b PE=4 SV=1                                     |
| CCG019605.1 | 1542 | 1 | 37 | 0.0278662 | 0.838817277 | 4.911766569 | Up | 0.00059  | 0.000915 | AAEL011028-PA OS=Aedes aegypti GN=AAEL011028 PE=4 SV=1                                   |
| CCG014491.1 | 975  | 2 | 73 | 0.088143  | 2.617388928 | 4.892137763 | Up | 9.36E-05 | 0.000154 | AAEL006329-PA OS=Aedes aegypti GN=AAEL006329 PE=4 SV=1                                   |
| CCG014322.1 | 480  | 1 | 36 | 0.0895203 | 2.621870758 | 4.872238205 | Up | 0.00059  | 0.000915 | AAEL009770-PA OS=Aedes aegypti GN=AAEL009770 PE=2 SV=1                                   |
| CCG024491.1 | 725  | 1 | 36 | 0.0592686 | 1.73585926  | 4.872238205 | Up | 0.00059  | 0.000915 | Putative uncharacterized protein OS=Aedes aegypti PE=4 SV=1                              |
| CCG009757.1 | 396  | 2 | 71 | 0.2170189 | 6.267771846 | 4.852060323 | Up | 9.36E-05 | 0.000154 | AAEL006197-PA OS=Aedes aegypti GN=AAEL006197 PE=4 SV=1                                   |
| CCG022958.1 | 633  | 1 | 35 | 0.0678827 | 1.932922096 | 4.831596221 | Up | 0.00059  | 0.000915 | AAEL000896-PA OS=Aedes aegypti GN=AAEL000896 PE=4 SV=1                                   |
| CCG015907.1 | 567  | 1 | 35 | 0.0757844 | 2.157918319 | 4.831596221 | Up | 0.00059  | 0.000915 | AAEL007039-PA OS=Aedes aegypti GN=PGRPS5_b PE=4 SV=1                                     |
| CCG000691.1 | 594  | 1 | 34 | 0.0723396 | 2.000978805 | 4.789776045 | Up | 0.00059  | 0.000915 | AAEL003775-PA OS=Aedes aegypti GN=AAEL003775 PE=4 SV=1                                   |
| CCG019071.1 | 282  | 1 | 34 | 0.1523749 | 4.214827696 | 4.789776045 | Up | 0.00059  | 0.000915 | AAEL008863-PA OS=Aedes aegypti GN=AAEL008863 PE=4 SV=1                                   |

|             |      |   |    |           |             |             |    |          |          |                                                                                             |
|-------------|------|---|----|-----------|-------------|-------------|----|----------|----------|---------------------------------------------------------------------------------------------|
| CCG007916.1 | 2372 | 1 | 34 | 0.0181154 | 0.501088284 | 4.789776045 | Up | 0.00059  | 0.000915 | Putative uncharacterized protein OS=Caenorhabditis remanei<br>GN=CRE_08209 PE=4 SV=1        |
| CCG023021.1 | 490  | 1 | 34 | 0.0876933 | 2.425676347 | 4.789776045 | Up | 0.00059  | 0.000915 | AAEL010576-PN OS=Aedes aegypti GN=AAEL010576 PE=4<br>SV=1                                   |
| CCG008028.1 | 2383 | 2 | 65 | 0.0360636 | 0.953540911 | 4.724681017 | Up | 9.36E-05 | 0.000154 | Putative uncharacterized protein OS=Aedes aegypti PE=4 SV=1                                 |
| CCG002198.1 | 561  | 1 | 32 | 0.0765949 | 1.994055003 | 4.702313204 | Up | 0.00059  | 0.000915 | AAEL008337-PA OS=Aedes aegypti GN=AAEL008337 PE=4<br>SV=1                                   |
| CCG007624.1 | 642  | 2 | 63 | 0.1338621 | 3.430485104 | 4.679593127 | Up | 9.36E-05 | 0.000154 | AAEL010375-PA OS=Aedes aegypti GN=AAEL010375 PE=4<br>SV=1                                   |
| CCG006728.1 | 1506 | 1 | 31 | 0.0285324 | 0.719592683 | 4.656509514 | Up | 0.00059  | 0.000915 | Putative uncharacterized protein OS=Culex quinquefasciatus<br>GN=CpipJ_CPIJ006292 PE=4 SV=1 |
| CCG022573.1 | 417  | 1 | 31 | 0.1030449 | 2.598816738 | 4.656509514 | Up | 0.00059  | 0.000915 | AAEL001539-PA (Fragment) OS=Aedes aegypti<br>GN=AAEL001539 PE=4 SV=1                        |
| CCG007143.1 | 1635 | 2 | 61 | 0.0525624 | 1.304253751 | 4.633050541 | Up | 9.36E-05 | 0.000154 | Putative uncharacterized protein OS=Culex quinquefasciatus<br>GN=CpipJ_CPIJ018804 PE=4 SV=1 |
| CCG002930.1 | 204  | 2 | 61 | 0.4212719 | 10.45321021 | 4.633050541 | Up | 9.36E-05 | 0.000154 | AAEL003533-PA OS=Aedes aegypti GN=AAEL003533 PE=4<br>SV=1                                   |
| CCG006327.1 | 537  | 1 | 30 | 0.0800181 | 1.952976356 | 4.609203799 | Up | 0.00059  | 0.000915 | AAEL007972-PA OS=Aedes aegypti GN=AAEL007972 PE=3<br>SV=1                                   |
| CCG025091.1 | 1446 | 1 | 30 | 0.0297163 | 0.725275452 | 4.609203799 | Up | 0.00059  | 0.000915 | AAEL012230-PA OS=Aedes aegypti GN=AAEL012230 PE=4<br>SV=1                                   |
| CCG016472.1 | 873  | 1 | 30 | 0.0492208 | 1.201315353 | 4.609203799 | Up | 0.00059  | 0.000915 | AAEL004584-PA OS=Aedes aegypti GN=AAEL004584 PE=4<br>SV=1                                   |
| CCG007299.1 | 1080 | 2 | 59 | 0.0795736 | 1.909757713 | 4.584956253 | Up | 9.36E-05 | 0.000154 | AAEL004561-PA OS=Aedes aegypti GN=AAEL004561 PE=4<br>SV=1                                   |
| CCG022185.1 | 5617 | 2 | 58 | 0.0152999 | 0.360972059 | 4.560294199 | Up | 9.36E-05 | 0.000154 | Putative uncharacterized protein OS=Culex quinquefasciatus<br>GN=CpipJ_CPIJ018804 PE=4 SV=1 |
| CCG002202.2 | 1522 | 2 | 58 | 0.0564648 | 1.332181375 | 4.560294199 | Up | 9.36E-05 | 0.000153 | AAEL015565-PA OS=Aedes aegypti GN=AAEL015565 PE=4<br>SV=1                                   |
| CCG000275.1 | 762  | 1 | 29 | 0.0563907 | 1.330433106 | 4.560294199 | Up | 0.00059  | 0.000915 | -                                                                                           |
| CCG014797.1 | 1152 | 1 | 29 | 0.0373001 | 0.880026065 | 4.560294199 | Up | 0.00059  | 0.000915 | AAEL008459-PA OS=Aedes aegypti GN=AAEL008459 PE=4<br>SV=1                                   |
| CCG019376.1 | 612  | 1 | 29 | 0.070212  | 1.656519651 | 4.560294199 | Up | 0.00059  | 0.000915 | AAEL006639-PA OS=Aedes aegypti GN=AAEL006639 PE=4<br>SV=1                                   |

|             |      |   |    |           |             |             |    |          |          |                                                                                          |
|-------------|------|---|----|-----------|-------------|-------------|----|----------|----------|------------------------------------------------------------------------------------------|
| CCG016055.1 | 968  | 2 | 57 | 0.0887804 | 2.05849357  | 4.535203218 | Up | 9.36E-05 | 0.000154 | AAEL013652-PA OS=Aedes aegypti GN=AAEL013652 PE=3 SV=1                                   |
| CCG024059.1 | 2064 | 2 | 57 | 0.0416373 | 0.965417527 | 4.535203218 | Up | 9.36E-05 | 0.000153 | AAEL012229-PA OS=Aedes aegypti GN=AAEL012229 PE=4 SV=1                                   |
| CCG003644.1 | 1182 | 2 | 57 | 0.0727068 | 1.685805225 | 4.535203218 | Up | 9.36E-05 | 0.000153 | AAEL014020-PA OS=Aedes aegypti GN=AAEL014020 PE=4 SV=1                                   |
| CCG021054.1 | 726  | 2 | 56 | 0.1183739 | 2.696506197 | 4.509668126 | Up | 9.36E-05 | 0.000154 | AAEL012824-PA OS=Aedes aegypti GN=AAEL012824 PE=3 SV=1                                   |
| CCG002773.1 | 1101 | 2 | 55 | 0.0780558 | 1.746326269 | 4.483672917 | Up | 9.36E-05 | 0.000154 | AAEL000979-PA OS=Aedes aegypti GN=AAEL000979 PE=4 SV=1                                   |
| CCG014813.1 | 1710 | 2 | 55 | 0.050257  | 1.124389019 | 4.483672917 | Up | 9.36E-05 | 0.000154 | AAEL006747-PA OS=Aedes aegypti GN=AAEL006747 PE=4 SV=1                                   |
| CCG009644.1 | 1275 | 2 | 54 | 0.0674035 | 1.48058584  | 4.457200706 | Up | 9.36E-05 | 0.000154 | AAEL014550-PA (Fragment) OS=Aedes aegypti GN=AAEL014550 PE=3 SV=1                        |
| CCG024631.1 | 519  | 1 | 27 | 0.0827933 | 1.818638676 | 4.457200706 | Up | 0.00059  | 0.000917 | AAEL014348-PB OS=Aedes aegypti GN=CASPS8 PE=4 SV=1                                       |
| CCG003047.1 | 324  | 1 | 27 | 0.1326226 | 2.913189731 | 4.457200706 | Up | 0.00059  | 0.000917 | -                                                                                        |
| CCG024719.1 | 795  | 2 | 54 | 0.1081    | 2.37452446  | 4.457200706 | Up | 9.36E-05 | 0.000153 | AAEL006919-PA OS=Aedes aegypti GN=AAEL006919 PE=3 SV=1                                   |
| CCG012020.1 | 381  | 2 | 53 | 0.2255629 | 4.862962386 | 4.430233658 | Up | 9.36E-05 | 0.000154 | Uncharacterized protein OS=Anopheles darlingi GN=AND_08690 PE=4 SV=1                     |
| CCG003189.1 | 570  | 2 | 53 | 0.150771  | 3.250506437 | 4.430233658 | Up | 9.36E-05 | 0.000154 | -                                                                                        |
| CCG022084.1 | 1464 | 2 | 53 | 0.0587018 | 1.265566031 | 4.430233658 | Up | 9.36E-05 | 0.000154 | AAEL007619-PA OS=Aedes aegypti GN=TOLL5A PE=4 SV=1                                       |
| CCG013467.1 | 426  | 1 | 26 | 0.1008679 | 2.133603747 | 4.402752922 | Up | 0.00059  | 0.000918 | -                                                                                        |
| CCG001719.1 | 687  | 2 | 50 | 0.1250938 | 2.544270507 | 4.346169394 | Up | 9.36E-05 | 0.000153 | AAEL008482-PA OS=Aedes aegypti GN=AAEL008482 PE=4 SV=1                                   |
| CCG009344.1 | 1554 | 1 | 25 | 0.0276511 | 0.56239184  | 4.346169394 | Up | 0.00059  | 0.000921 | Putative uncharacterized protein OS=Culex quinquefasciatus GN=CpipJ_CPIJ001210 PE=4 SV=1 |
| CCG028585.1 | 609  | 1 | 25 | 0.0705579 | 1.435068833 | 4.346169394 | Up | 0.00059  | 0.000922 | -                                                                                        |
| CCG014490.1 | 497  | 1 | 25 | 0.0864582 | 1.758464626 | 4.346169394 | Up | 0.00059  | 0.000921 | -                                                                                        |
| CCG015051.1 | 840  | 1 | 25 | 0.0511544 | 1.040424904 | 4.346169394 | Up | 0.00059  | 0.000921 | AAEL013780-PA OS=Aedes aegypti GN=AAEL013780 PE=4 SV=1                                   |
| CCG005470.1 | 319  | 2 | 48 | 0.2694027 | 5.260179577 | 4.287275705 | Up | 9.36E-05 | 0.000153 | -                                                                                        |
| CCG026325.1 | 1680 | 2 | 48 | 0.0511544 | 0.998807908 | 4.287275705 | Up | 9.36E-05 | 0.000153 | AAEL014180-PA OS=Aedes aegypti GN=AAEL014180 PE=4 SV=1                                   |
| CCG022023.1 | 634  | 1 | 24 | 0.0677756 | 1.323341707 | 4.287275705 | Up | 0.0006   | 0.000927 | -                                                                                        |

|             |      |   |    |           |             |             |    |          |          |                                                                                                            |
|-------------|------|---|----|-----------|-------------|-------------|----|----------|----------|------------------------------------------------------------------------------------------------------------|
| CCG006414.1 | 533  | 1 | 24 | 0.0806186 | 1.574106271 | 4.287275705 | Up | 0.0006   | 0.000927 | -                                                                                                          |
| CCG020550.1 | 513  | 1 | 24 | 0.0837617 | 1.635474937 | 4.287275705 | Up | 0.0006   | 0.000927 | -                                                                                                          |
| CCG005657.1 | 403  | 2 | 48 | 0.2132493 | 4.163764975 | 4.287275705 | Up | 9.36E-05 | 0.000153 | -                                                                                                          |
| CCG007667.1 | 3242 | 1 | 24 | 0.0132541 | 0.258790451 | 4.287275705 | Up | 0.0006   | 0.000927 | Elongation factor 1-alpha OS=Aedes aegypti PE=2 SV=1                                                       |
| CCG017399.1 | 415  | 2 | 46 | 0.2070831 | 3.874893329 | 4.22587516  | Up | 9.36E-05 | 0.000153 | -                                                                                                          |
| CCG022013.1 | 648  | 2 | 46 | 0.1326226 | 2.481606067 | 4.22587516  | Up | 9.36E-05 | 0.000153 | AAEL011896-PA OS=Aedes aegypti GN=AAEL011896 PE=4 SV=1                                                     |
| CCG006816.1 | 921  | 1 | 23 | 0.0466555 | 0.873007998 | 4.22587516  | Up | 0.0006   | 0.000936 | AAEL004556-PA OS=Aedes aegypti GN=AAEL004556 PE=4 SV=1                                                     |
| CCG006460.1 | 528  | 1 | 23 | 0.0813821 | 1.522803723 | 4.22587516  | Up | 0.0006   | 0.000936 | Putative uncharacterized protein OS=Culex quinquefasciatus GN=CpipJ_CPIJ003878 PE=4 SV=1                   |
| CCG016559.1 | 2223 | 2 | 44 | 0.0386592 | 0.691931704 | 4.161744822 | Up | 9.36E-05 | 0.000153 | AAEL002752-PA OS=Aedes aegypti GN=AAEL002752 PE=4 SV=1                                                     |
| CCG008314.1 | 323  | 2 | 44 | 0.2660665 | 4.762118198 | 4.161744822 | Up | 9.36E-05 | 0.000153 | AAEL000278-PA (Fragment) OS=Aedes aegypti GN=AAEL000278 PE=3 SV=1                                          |
| CCG002259.1 | 425  | 1 | 22 | 0.1011053 | 1.809604915 | 4.161744822 | Up | 0.00061  | 0.000953 | Uncharacterized protein OS=Metarhizium anisopliae (strain ARSEF 23 / ATCC MYA-3075) GN=MAA_00416 PE=4 SV=1 |
| CCG018950.1 | 435  | 1 | 22 | 0.098781  | 1.768004802 | 4.161744822 | Up | 0.00061  | 0.000953 | AAEL006494-PA (Fragment) OS=Aedes aegypti GN=GPRgr45 PE=3 SV=2                                             |
| CCG000678.1 | 456  | 1 | 22 | 0.0942319 | 1.686583528 | 4.161744822 | Up | 0.00061  | 0.000953 | AAEL013835-PA OS=Aedes aegypti GN=AAEL013835 PE=4 SV=1                                                     |
| CCG003689.1 | 933  | 1 | 22 | 0.0460555 | 0.824310921 | 4.161744822 | Up | 0.00061  | 0.000953 | Putative uncharacterized protein OS=Culex quinquefasciatus GN=CpipJ_CPIJ008885 PE=4 SV=1                   |
| CCG024031.1 | 633  | 2 | 43 | 0.1357654 | 2.374732861 | 4.128577959 | Up | 9.36E-05 | 0.000153 | AAEL004662-PA OS=Aedes aegypti GN=AAEL004662 PE=4 SV=1                                                     |
| CCG026612.1 | 2073 | 2 | 42 | 0.0414566 | 0.708271888 | 4.094630627 | Up | 9.36E-05 | 0.000153 | Polyribonucleotide nucleotidyltransferase OS=Wolbachia pipientis wAlbB GN=pnp PE=3 SV=1                    |
| CCG011750.1 | 891  | 1 | 21 | 0.0482264 | 0.823932449 | 4.094630627 | Up | 0.00063  | 0.000982 | -                                                                                                          |
| CCG000734.2 | 465  | 1 | 21 | 0.092408  | 1.578760886 | 4.094630627 | Up | 0.00063  | 0.000982 | -                                                                                                          |
| CCG005660.1 | 591  | 2 | 41 | 0.1454137 | 2.425193482 | 4.059865208 | Up | 9.36E-05 | 0.000153 | AAEL013345-PA OS=Aedes aegypti GN=AAEL013345 PE=3 SV=1                                                     |
| CCG009270.1 | 1695 | 2 | 40 | 0.0507018 | 0.824974083 | 4.024241299 | Up | 9.36E-05 | 0.000153 | AAEL003187-PA (Fragment) OS=Aedes aegypti GN=AAEL003187 PE=4 SV=1                                          |
| CCG023387.1 | 780  | 2 | 39 | 0.1101788 | 1.747913839 | 3.987715423 | Up | 9.36E-05 | 0.000153 | -                                                                                                          |

|             |      |   |    |           |             |             |    |          |          |                                                                                        |
|-------------|------|---|----|-----------|-------------|-------------|----|----------|----------|----------------------------------------------------------------------------------------|
| CCG025537.1 | 596  | 2 | 38 | 0.1441937 | 2.228883418 | 3.950240717 | Up | 9.36E-05 | 0.000153 | AAEL010576-PI OS=Aedes aegypti GN=AAEL010576 PE=4 SV=1                                 |
| CCG003231.1 | 438  | 2 | 38 | 0.1962088 | 3.032909857 | 3.950240717 | Up | 9.36E-05 | 0.000153 | Reverse transcriptase OS=Aedes aegypti GN=pol PE=4 SV=1                                |
| CCG015576.1 | 1591 | 2 | 38 | 0.054016  | 0.834955699 | 3.950240717 | Up | 9.36E-05 | 0.000153 | -                                                                                      |
| CCG010129.1 | 609  | 2 | 37 | 0.1411157 | 2.123901873 | 3.911766569 | Up | 9.36E-05 | 0.000153 | AAEL003927-PA OS=Aedes aegypti GN=AAEL003927 PE=4 SV=1                                 |
| CCG016271.1 | 1161 | 2 | 36 | 0.0740219 | 1.083977574 | 3.872238205 | Up | 9.36E-05 | 0.000153 | AAEL013852-PA OS=Aedes aegypti GN=AAEL013852 PE=4 SV=1                                 |
| CCG004412.1 | 4492 | 2 | 36 | 0.0191317 | 0.280164284 | 3.872238205 | Up | 9.36E-05 | 0.000153 | BEL12_AG transposon polyprotein OS=Anopheles gambiae GN=BEL12-AG transposon PE=4 SV=1  |
| CCG019174.1 | 399  | 2 | 36 | 0.2153871 | 3.154130235 | 3.872238205 | Up | 9.36E-05 | 0.000153 | AAEL002617-PA OS=Aedes aegypti GN=AAEL002617 PE=4 SV=1                                 |
| CCG010622.1 | 1752 | 2 | 36 | 0.0490522 | 0.718320756 | 3.872238205 | Up | 9.36E-05 | 0.000153 | AAEL001986-PA OS=Aedes aegypti GN=AAEL001986 PE=3 SV=1                                 |
| CCG026332.1 | 1124 | 2 | 35 | 0.0764586 | 1.08855844  | 3.831596221 | Up | 9.37E-05 | 0.000153 | AAEL007996-PA OS=Aedes aegypti GN=AAEL007996 PE=4 SV=1                                 |
| CCG004719.1 | 4358 | 2 | 34 | 0.0197199 | 0.272735523 | 3.789776045 | Up | 9.38E-05 | 0.000153 | Putative uncharacterized protein 882 (3' region) (Fragment) OS=Aedes aegypti PE=4 SV=1 |
| CCG011553.1 | 489  | 2 | 34 | 0.1757453 | 2.430636831 | 3.789776045 | Up | 9.38E-05 | 0.000153 | AAEL000913-PA OS=Aedes aegypti GN=AAEL000913 PE=4 SV=1                                 |
| CCG007384.1 | 1573 | 2 | 34 | 0.0546341 | 0.755614374 | 3.789776045 | Up | 9.38E-05 | 0.000153 | AAEL006747-PA OS=Aedes aegypti GN=AAEL006747 PE=4 SV=1                                 |
| CCG016872.1 | 2110 | 2 | 34 | 0.0407296 | 0.563308725 | 3.789776045 | Up | 9.38E-05 | 0.000153 | Uncharacterized protein OS=Anopheles darlingi GN=AND_11211 PE=4 SV=1                   |
| CCG020376.1 | 456  | 2 | 34 | 0.1884637 | 2.60653818  | 3.789776045 | Up | 9.38E-05 | 0.000153 | -                                                                                      |
| CCG028479.1 | 1011 | 2 | 34 | 0.0850044 | 1.175649268 | 3.789776045 | Up | 9.38E-05 | 0.000153 | AAEL014410-PA OS=Aedes aegypti GN=AAEL014410 PE=4 SV=1                                 |
| CCG012240.1 | 1478 | 2 | 33 | 0.0581458 | 0.78052986  | 3.746707323 | Up | 9.40E-05 | 0.000154 | -                                                                                      |
| CCG016501.1 | 1509 | 2 | 33 | 0.0569513 | 0.764495118 | 3.746707323 | Up | 9.40E-05 | 0.000154 | -                                                                                      |
| CCG013649.1 | 2117 | 2 | 32 | 0.0405949 | 0.528419866 | 3.702313204 | Up | 9.43E-05 | 0.000154 | AAEL010730-PA OS=Aedes aegypti GN=AAEL010730 PE=4 SV=1                                 |
| CCG026885.1 | 1275 | 2 | 32 | 0.0674035 | 0.877384201 | 3.702313204 | Up | 9.43E-05 | 0.000154 | AAEL014814-PA OS=Aedes aegypti GN=AAEL014814 PE=4 SV=1                                 |
| CCG007709.1 | 683  | 2 | 32 | 0.1258265 | 1.637869483 | 3.702313204 | Up | 9.43E-05 | 0.000154 | Uncharacterized protein OS=Anopheles darlingi GN=AND_08768 PE=4 SV=1                   |

|             |      |   |    |           |             |             |    |          |          |                                                                                             |
|-------------|------|---|----|-----------|-------------|-------------|----|----------|----------|---------------------------------------------------------------------------------------------|
| CCG028224.1 | 1078 | 2 | 32 | 0.0797212 | 1.037722502 | 3.702313204 | Up | 9.43E-05 | 0.000154 | -                                                                                           |
| CCG010828.1 | 447  | 2 | 31 | 0.1922583 | 2.424399508 | 3.656509514 | Up | 9.48E-05 | 0.000155 | AAEL001249-PA OS=Aedes aegypti GN=AAEL001249 PE=4 SV=1                                      |
| CCG010000.1 | 552  | 2 | 31 | 0.1556874 | 1.963236558 | 3.656509514 | Up | 9.48E-05 | 0.000155 | AAEL009184-PA OS=Aedes aegypti GN=AAEL009184 PE=4 SV=1                                      |
| CCG013140.1 | 192  | 2 | 31 | 0.4476014 | 5.644305104 | 3.656509514 | Up | 9.48E-05 | 0.000155 | Gambicin OS=Aedes triseriatus PE=4 SV=1                                                     |
| CCG000074.1 | 1434 | 2 | 31 | 0.0599299 | 0.755722859 | 3.656509514 | Up | 9.48E-05 | 0.000155 | -                                                                                           |
| CCG012380.1 | 966  | 2 | 30 | 0.0889643 | 1.085660769 | 3.609203799 | Up | 9.58E-05 | 0.000156 | AAEL014506-PA (Fragment) OS=Aedes aegypti GN=AAEL014506 PE=4 SV=1                           |
| CCG020165.1 | 537  | 2 | 30 | 0.1600363 | 1.952976356 | 3.609203799 | Up | 9.58E-05 | 0.000156 | AAEL006623-PA OS=Aedes aegypti GN=AAEL006623 PE=4 SV=1                                      |
| CCG020649.1 | 643  | 2 | 29 | 0.1336539 | 1.57665634  | 3.560294199 | Up | 9.73E-05 | 0.000159 | -                                                                                           |
| CCG001033.1 | 642  | 2 | 29 | 0.1338621 | 1.579112191 | 3.560294199 | Up | 9.73E-05 | 0.000159 | -                                                                                           |
| CCG013766.1 | 1635 | 2 | 29 | 0.0525624 | 0.620055062 | 3.560294199 | Up | 9.73E-05 | 0.000159 | AAEL011341-PA OS=Aedes aegypti GN=AAEL011341 PE=3 SV=1                                      |
| CCG014413.1 | 418  | 2 | 29 | 0.2055968 | 2.425334991 | 3.560294199 | Up | 9.73E-05 | 0.000159 | -                                                                                           |
| CCG007712.1 | 1680 | 2 | 28 | 0.0511544 | 0.582637946 | 3.509668126 | Up | 0.0001   | 0.000163 | Chaperone protein DnaK OS=Wolbachia pipientis wAlbB GN=dnaK PE=3 SV=1                       |
| CCG017638.1 | 588  | 2 | 28 | 0.1461556 | 1.664679846 | 3.509668126 | Up | 0.0001   | 0.000163 | AAEL011649-PA OS=Aedes aegypti GN=AAEL011649 PE=4 SV=1                                      |
| CCG006044.1 | 1140 | 2 | 28 | 0.0753855 | 0.858624342 | 3.509668126 | Up | 0.0001   | 0.000163 | Yellow-g OS=Culex quinquefasciatus GN=CpipJ_CPIJ008961 PE=4 SV=1                            |
| CCG024584.1 | 2261 | 2 | 28 | 0.0380095 | 0.432919836 | 3.509668126 | Up | 0.0001   | 0.000163 | Pol polyprotein (Fragment) OS=Anopheles gambiae PE=4 SV=1                                   |
| CCG018098.1 | 1053 | 2 | 27 | 0.0816139 | 0.896366071 | 3.457200706 | Up | 0.0001   | 0.00017  | AAEL011917-PA OS=Aedes aegypti GN=AAEL011917 PE=3 SV=1                                      |
| CCG011594.1 | 1560 | 2 | 26 | 0.0550894 | 0.582637946 | 3.402752922 | Up | 0.00011  | 0.000183 | AAEL010194-PA OS=Aedes aegypti GN=AAEL010194 PE=4 SV=1                                      |
| CCG003349.1 | 942  | 2 | 26 | 0.0912309 | 0.964878127 | 3.402752922 | Up | 0.00011  | 0.000183 | AAEL005554-PA OS=Aedes aegypti GN=AAEL005554 PE=4 SV=1                                      |
| CCG012401.1 | 1655 | 2 | 26 | 0.0519272 | 0.549193472 | 3.402752922 | Up | 0.00011  | 0.000183 | Putative uncharacterized protein (Fragment) OS=Camponotus floridanus GN=EAG_00896 PE=4 SV=1 |
| CCG011245.1 | 657  | 2 | 26 | 0.1308059 | 1.383432566 | 3.402752922 | Up | 0.00011  | 0.000183 | AAEL010636-PA OS=Aedes aegypti GN=AAEL010636 PE=4 SV=1                                      |
| CCG018656.1 | 836  | 2 | 25 | 0.1027984 | 1.045403014 | 3.346169394 | Up | 0.00013  | 0.000203 | AAEL005607-PA OS=Aedes aegypti GN=AAEL005607 PE=3 SV=1                                      |



|             |      |   |    |           |             |             |    |         |          |                                                                                          |
|-------------|------|---|----|-----------|-------------|-------------|----|---------|----------|------------------------------------------------------------------------------------------|
| CCG004492.1 | 838  | 2 | 25 | 0.1025531 | 1.042908018 | 3.346169394 | Up | 0.00013 | 0.000203 | -                                                                                        |
| CCG018437.1 | 1701 | 2 | 25 | 0.0505229 | 0.513790076 | 3.346169394 | Up | 0.00013 | 0.000203 | AAEL008252-PA OS=Aedes aegypti GN=AAEL008252 PE=3 SV=1                                   |
| CCG012172.1 | 410  | 2 | 24 | 0.2096085 | 2.046338153 | 3.287275705 | Up | 0.00015 | 0.000238 | Predicted protein OS=Culex quinquefasciatus GN=CpipJ_CPIJ001647 PE=4 SV=1                |
| CCG015815.1 | 825  | 2 | 24 | 0.1041691 | 1.016968052 | 3.287275705 | Up | 0.00015 | 0.000238 | AAEL012564-PA OS=Aedes aegypti GN=AAEL012564 PE=3 SV=1                                   |
| CCG002416.1 | 1687 | 2 | 24 | 0.0509422 | 0.497331738 | 3.287275705 | Up | 0.00015 | 0.000238 | Putative uncharacterized protein OS=Aedes aegypti PE=4 SV=1                              |
| CCG021794.1 | 297  | 2 | 24 | 0.2893585 | 2.824911254 | 3.287275705 | Up | 0.00015 | 0.000238 | AAEL005936-PA OS=Aedes aegypti GN=AAEL005936 PE=4 SV=1                                   |
| CCG019917.1 | 687  | 2 | 24 | 0.1250938 | 1.221249844 | 3.287275705 | Up | 0.00015 | 0.000238 | -                                                                                        |
| CCG025567.1 | 648  | 2 | 23 | 0.1326226 | 1.240803034 | 3.22587516  | Up | 0.00018 | 0.000296 | -                                                                                        |
| CCG016096.1 | 204  | 2 | 23 | 0.4212719 | 3.941374342 | 3.22587516  | Up | 0.00018 | 0.000296 | Putative uncharacterized protein OS=Culex quinquefasciatus GN=CpipJ_CPIJ014565 PE=4 SV=1 |
| CCG006935.1 | 1371 | 2 | 23 | 0.0626838 | 0.586462703 | 3.22587516  | Up | 0.00018 | 0.000296 | AAEL010721-PA OS=Aedes aegypti GN=AAEL010721 PE=4 SV=1                                   |
| CCG019990.1 | 849  | 2 | 23 | 0.1012243 | 0.947044011 | 3.22587516  | Up | 0.00018 | 0.000296 | AAEL013652-PA OS=Aedes aegypti GN=AAEL013652 PE=3 SV=1                                   |
| CCG028594.1 | 915  | 2 | 23 | 0.0939229 | 0.87873264  | 3.22587516  | Up | 0.00018 | 0.000296 | AAEL006410-PA OS=Aedes aegypti GN=AAEL006410 PE=4 SV=1                                   |
| CCG017166.1 | 1862 | 2 | 22 | 0.0461544 | 0.413040864 | 3.161744822 | Up | 0.00024 | 0.000392 | RNase H and integrase-like protein (Fragment) OS=Bombyx mori GN=P-1 PE=4 SV=1            |
| CCG022134.1 | 438  | 2 | 22 | 0.1962088 | 1.75589518  | 3.161744822 | Up | 0.00024 | 0.000392 | AGAP000591-PA OS=Anopheles gambiae GN=AgaP_AGAP000591 PE=3 SV=4                          |
| CCG016336.1 | 777  | 2 | 21 | 0.1106042 | 0.944818291 | 3.094630627 | Up | 0.00035 | 0.000551 | AAEL010959-PA OS=Aedes aegypti GN=AAEL010959 PE=3 SV=1                                   |
| CCG006544.1 | 363  | 2 | 21 | 0.2367478 | 2.022379648 | 3.094630627 | Up | 0.00035 | 0.000551 | Putative uncharacterized protein OS=Culex quinquefasciatus GN=CpipJ_CPIJ001635 PE=4 SV=1 |
| CCG018932.1 | 1002 | 2 | 21 | 0.0857679 | 0.732658495 | 3.094630627 | Up | 0.00035 | 0.00055  | Putative uncharacterized protein OS=Culex quinquefasciatus GN=CpipJ_CPIJ009045 PE=4 SV=1 |
| CCG013642.1 | 354  | 2 | 21 | 0.2427669 | 2.07379608  | 3.094630627 | Up | 0.00035 | 0.00055  | AAEL009961-PA OS=Aedes aegypti GN=AAEL009961 PE=4 SV=1                                   |
| CCG025109.1 | 432  | 2 | 21 | 0.198934  | 1.699360676 | 3.094630627 | Up | 0.00035 | 0.000551 | -                                                                                        |
| CCG015293.1 | 1866 | 2 | 20 | 0.0460555 | 0.374686782 | 3.024241299 | Up | 0.00052 | 0.000812 | AAEL004778-PA OS=Aedes aegypti GN=AAEL004778 PE=3 SV=1                                   |

|             |      |   |    |           |             |             |    |         |          |                                                                                             |
|-------------|------|---|----|-----------|-------------|-------------|----|---------|----------|---------------------------------------------------------------------------------------------|
| CCG006701.1 | 1521 | 2 | 20 | 0.056502  | 0.459674908 | 3.024241299 | Up | 0.00052 | 0.000812 | AAEL001237-PA (Fragment) OS=Aedes aegypti<br>GN=AAEL001237 PE=4 SV=1                        |
| CCG003481.1 | 1157 | 2 | 20 | 0.0742778 | 0.604291733 | 3.024241299 | Up | 0.00052 | 0.000812 | -                                                                                           |
| CCG015706.1 | 477  | 2 | 20 | 0.1801666 | 1.46575584  | 3.024241299 | Up | 0.00052 | 0.000812 | Putative uncharacterized protein OS=Culex quinquefasciatus<br>GN=CpipJ_CPIJ002557 PE=4 SV=1 |

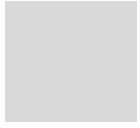

Supplement: pnas.1516410112.sd26.pdf [file pnas.1516410112.sd26.pdf]
