# Supplementary material
Source: PubMed Central journal article supplement (PMC4640774)

**Table S7.6. Full list of Cellular Compartment Gene Ontology categories enriched in sex-biased genes** (Terms from the Function Ontology with p-value  $\leq 1$ .)

| GOID       | Gene Ontology term | Cluster frequency       | Genome frequency of        | Corrected P- | Genes annotated to the term                                                                                                                                                                                                                                                                                                                                                                                                                                                                                                                                                                                                                                                                                                                                                                                                                                                                                                                                                                                                                                                                                                                                                                                                                                                                                                                                                                                                                                                                                                                                                     |
|------------|--------------------|-------------------------|----------------------------|--------------|---------------------------------------------------------------------------------------------------------------------------------------------------------------------------------------------------------------------------------------------------------------------------------------------------------------------------------------------------------------------------------------------------------------------------------------------------------------------------------------------------------------------------------------------------------------------------------------------------------------------------------------------------------------------------------------------------------------------------------------------------------------------------------------------------------------------------------------------------------------------------------------------------------------------------------------------------------------------------------------------------------------------------------------------------------------------------------------------------------------------------------------------------------------------------------------------------------------------------------------------------------------------------------------------------------------------------------------------------------------------------------------------------------------------------------------------------------------------------------------------------------------------------------------------------------------------------------|
| GO:0005634 | nucleus            | 899 of 3038 in the list | 1212 of 5465 in the genome | 5.63E-49     | CCG014863.1,CCG027068.1,CCG022266.1,CCG014871.1,CCG006549.1,CCG008767.3,CCG026106.1,CCG008741.1,CCG003390.1,CCG009827.1,CCG017226.1,CCG024274.1,CCG019811.1,CCG025256.1,CCG003389.1,CCG008846.1,CCG013625.1,CCG005171.1,CCG010803.1,CCG021465.1,CCG001292.1,CCG001177.1,CCG004364.1,CCG018321.1,CCG001404.1,CCG002154.1,CCG006134.1,CCG027906.1,CCG005194.1,CCG018432.1,CCG014866.1,CCG009070.1,CCG004932.1,CCG025208.1,CCG017078.1,CCG023723.1,CCG011696.1,CCG020718.1,CCG013695.1,CCG027127.1,CCG011533.1,CCG009103.1,CCG022824.1,CCG027193.1,CCG017954.1,CCG004853.1,CCG022281.1,CCG006554.2,CCG028046.1,CCG015625.1,CCG010909.1,CCG028653.1,CCG024387.1,CCG006377.1,CCG007005.1,CCG020286.1,CCG000136.1,CCG007800.1,CCG000588.1,CCG008144.1,CCG017801.1,CCG009822.1,CCG027133.1,CCG026982.1,CCG017181.1,CCG022706.1,CCG016906.1,CCG028568.1,CCG026487.1,CCG017366.1,CCG007647.1,CCG004331.1,CCG006484.1,CCG007221.2,CCG012083.1,CCG025257.1,CCG024437.1,CCG009263.1,CCG015900.1,CCG022136.1,CCG023937.1,CCG001461.1,CCG021159.1,CCG000709.1,CCG017760.1,CCG009386.1,CCG023686.1,CCG002091.1,CCG004402.1,CCG023853.1,CCG002244.1,CCG002198.1,CCG025990.1,CCG000133.1,CCG013224.2,CCG011239.1,CCG023777.1,CCG026228.2,CCG017953.2,CCG011097.1,CCG004927.1,CCG009805.2,CCG000911.1,CCG005108.1,CCG025389.1,CCG016249.1,CCG028465.1,CCG012584.1,CCG010962.1,CCG020063.1,CCG002570.1,CCG009823.1,CCG025255.1,CCG024788.1,CCG003193.1,CCG025057.1,CCG017158.1,CCG021426.1,CCG010912.1,CCG004955.1,CCG010011.1,CCG027289.1,CCG022496.1,CCG004646.1,CCG028556.1,CCG003424.1,CCG0248 |

|            |               |                          |                            |          |                                                                                                                                                                                                                                                                                                                                                                                                                                                                                                                                                                                                                                                                                                                                                                                                                                                                                                                                                                                                                                                                                                                                                                                                                                                                                                                                                                                                                                                                                                                                                                                 |
|------------|---------------|--------------------------|----------------------------|----------|---------------------------------------------------------------------------------------------------------------------------------------------------------------------------------------------------------------------------------------------------------------------------------------------------------------------------------------------------------------------------------------------------------------------------------------------------------------------------------------------------------------------------------------------------------------------------------------------------------------------------------------------------------------------------------------------------------------------------------------------------------------------------------------------------------------------------------------------------------------------------------------------------------------------------------------------------------------------------------------------------------------------------------------------------------------------------------------------------------------------------------------------------------------------------------------------------------------------------------------------------------------------------------------------------------------------------------------------------------------------------------------------------------------------------------------------------------------------------------------------------------------------------------------------------------------------------------|
| GO:0005622 | intracellular | 2175 of 3038 in the list | 3439 of 5465 in the genome | 1.58E-47 | CCG005254.1,CCG014531.2,CCG017420.1,CCG027068.1,CCG004973.1,CCG008767.3,CCG027509.1,CCG026106.1,CCG025108.1,CCG023989.1,CCG004583.4,CCG005974.1,CCG008041.1,CCG027906.1,CCG025208.1,CCG017078.1,CCG023723.1,CCG006992.1,CCG019382.1,CCG026413.3,CCG023474.1,CCG026871.2,CCG011533.1,CCG003767.1,CCG021911.1,CCG022281.1,CCG004819.1,CCG010905.1,CCG017622.1,CCG008270.1,CCG013537.1,CCG015625.1,CCG028653.1,CCG026795.1,CCG007005.1,CCG000588.1,CCG009822.1,CCG019571.1,CCG022706.1,CCG026487.1,CCG017366.1,CCG002452.1,CCG018788.1,CCG012083.1,CCG004859.1,CCG009263.1,CCG024119.1,CCG021159.1,CCG023686.1,CCG002198.1,CCG001579.1,CCG013641.1,CCG003563.1,CCG006089.1,CCG000133.1,CCG004927.1,CCG000911.1,CCG001876.1,CCG013465.1,CCG002937.1,CCG000789.1,CCG021426.1,CCG010912.1,CCG007669.1,CCG027289.1,CCG022496.1,CCG028556.1,CCG012844.1,CCG010136.1,CCG022449.1,CCG024000.1,CCG023854.1,CCG000487.1,CCG007523.1,CCG010112.1,CCG004986.1,CCG007750.2,CCG006479.1,CCG010656.1,CCG001395.1,CCG027736.1,CCG012500.1,CCG005627.1,CCG026778.1,CCG008383.1,CCG027000.1,CCG013123.1,CCG024760.1,CCG017891.1,CCG011015.1,CCG020320.1,CCG006081.1,CCG023046.1,CCG015167.1,CCG021720.1,CCG012959.1,CCG015869.2,CCG003009.1,CCG004647.1,CCG000807.1,CCG006050.2,CCG025369.1,CCG003566.1,CCG009923.1,CCG001440.1,CCG015800.2,CCG001789.1,CCG003775.1,CCG009928.1,CCG005635.1,CCG015908.2,CCG013491.1,CCG022749.1,CCG004912.1,CCG003955.1,CCG024058.1,CCG007724.1,CCG012229.1,CCG024679.1,CCG018742.1,CCG005920.1,CCG015312.2,CCG000490.1,CCG005269.1,CCG019520.1,CCG012542.2,CCG0142 |
|------------|---------------|--------------------------|----------------------------|----------|---------------------------------------------------------------------------------------------------------------------------------------------------------------------------------------------------------------------------------------------------------------------------------------------------------------------------------------------------------------------------------------------------------------------------------------------------------------------------------------------------------------------------------------------------------------------------------------------------------------------------------------------------------------------------------------------------------------------------------------------------------------------------------------------------------------------------------------------------------------------------------------------------------------------------------------------------------------------------------------------------------------------------------------------------------------------------------------------------------------------------------------------------------------------------------------------------------------------------------------------------------------------------------------------------------------------------------------------------------------------------------------------------------------------------------------------------------------------------------------------------------------------------------------------------------------------------------|

|            |      |                          |                            |          |                                                                                                                                                                                                                                                                                                                                                                                                                                                                                                                                                                                                                                                                                                                                                                                                                                                                                                                                                                                                                                                                                                                                                                                                                                                                                                                                                                                                                                                                                                                                                                                 |
|------------|------|--------------------------|----------------------------|----------|---------------------------------------------------------------------------------------------------------------------------------------------------------------------------------------------------------------------------------------------------------------------------------------------------------------------------------------------------------------------------------------------------------------------------------------------------------------------------------------------------------------------------------------------------------------------------------------------------------------------------------------------------------------------------------------------------------------------------------------------------------------------------------------------------------------------------------------------------------------------------------------------------------------------------------------------------------------------------------------------------------------------------------------------------------------------------------------------------------------------------------------------------------------------------------------------------------------------------------------------------------------------------------------------------------------------------------------------------------------------------------------------------------------------------------------------------------------------------------------------------------------------------------------------------------------------------------|
| GO:0005623 | cell | 2223 of 3038 in the list | 3547 of 5465 in the genome | 3.00E-44 | CCG005254.1,CCG014531.2,CCG017420.1,CCG027068.1,CCG004973.1,CCG008767.3,CCG027509.1,CCG026106.1,CCG025108.1,CCG023989.1,CCG004583.4,CCG005974.1,CCG008041.1,CCG027906.1,CCG025208.1,CCG017078.1,CCG003362.1,CCG023723.1,CCG006992.1,CCG019382.1,CCG026413.3,CCG023474.1,CCG026871.2,CCG011533.1,CCG003767.1,CCG021911.1,CCG022281.1,CCG004819.1,CCG010905.1,CCG017622.1,CCG008270.1,CCG013537.1,CCG015625.1,CCG028653.1,CCG026795.1,CCG007005.1,CCG000588.1,CCG009822.1,CCG019571.1,CCG022706.1,CCG026487.1,CCG017366.1,CCG002452.1,CCG018788.1,CCG012083.1,CCG004859.1,CCG009263.1,CCG024119.1,CCG021159.1,CCG023686.1,CCG002198.1,CCG001579.1,CCG013641.1,CCG003563.1,CCG006089.1,CCG000133.1,CCG019647.1,CCG004927.1,CCG000911.1,CCG001876.1,CCG013465.1,CCG018688.1,CCG002937.1,CCG000789.1,CCG021426.1,CCG010912.1,CCG007669.1,CCG027289.1,CCG022496.1,CCG028556.1,CCG012844.1,CCG010136.1,CCG022449.1,CCG024000.1,CCG023854.1,CCG000487.1,CCG007523.1,CCG010112.1,CCG004986.1,CCG007750.2,CCG006479.1,CCG010656.1,CCG001395.1,CCG027736.1,CCG012500.1,CCG005627.1,CCG026778.1,CCG008383.1,CCG027000.1,CCG013123.1,CCG024760.1,CCG017891.1,CCG011015.1,CCG020320.1,CCG006081.1,CCG023046.1,CCG015167.1,CCG021720.1,CCG012959.1,CCG015869.2,CCG003009.1,CCG004647.1,CCG000807.1,CCG006050.2,CCG025369.1,CCG003566.1,CCG009923.1,CCG001440.1,CCG015800.2,CCG001789.1,CCG003775.1,CCG009928.1,CCG005635.1,CCG015908.2,CCG013491.1,CCG022749.1,CCG004912.1,CCG003955.1,CCG024058.1,CCG007724.1,CCG012229.1,CCG024679.1,CCG018742.1,CCG005920.1,CCG015312.2,CCG000490.1,CCG0052 |
|------------|------|--------------------------|----------------------------|----------|---------------------------------------------------------------------------------------------------------------------------------------------------------------------------------------------------------------------------------------------------------------------------------------------------------------------------------------------------------------------------------------------------------------------------------------------------------------------------------------------------------------------------------------------------------------------------------------------------------------------------------------------------------------------------------------------------------------------------------------------------------------------------------------------------------------------------------------------------------------------------------------------------------------------------------------------------------------------------------------------------------------------------------------------------------------------------------------------------------------------------------------------------------------------------------------------------------------------------------------------------------------------------------------------------------------------------------------------------------------------------------------------------------------------------------------------------------------------------------------------------------------------------------------------------------------------------------|

|            |           |                          |                            |          |                                                                                                                                                                                                                                                                                                                                                                                                                                                                                                                                                                                                                                                                                                                                                                                                                                                                                                                                                                                                                                                                                                                                                                                                                                                                                                                                                                                                                                                                                                                                                                                 |
|------------|-----------|--------------------------|----------------------------|----------|---------------------------------------------------------------------------------------------------------------------------------------------------------------------------------------------------------------------------------------------------------------------------------------------------------------------------------------------------------------------------------------------------------------------------------------------------------------------------------------------------------------------------------------------------------------------------------------------------------------------------------------------------------------------------------------------------------------------------------------------------------------------------------------------------------------------------------------------------------------------------------------------------------------------------------------------------------------------------------------------------------------------------------------------------------------------------------------------------------------------------------------------------------------------------------------------------------------------------------------------------------------------------------------------------------------------------------------------------------------------------------------------------------------------------------------------------------------------------------------------------------------------------------------------------------------------------------|
| GO:0044464 | cell part | 2223 of 3038 in the list | 3547 of 5465 in the genome | 3.00E-44 | CCG005254.1,CCG014531.2,CCG017420.1,CCG027068.1,CCG004973.1,CCG008767.3,CCG027509.1,CCG026106.1,CCG025108.1,CCG023989.1,CCG004583.4,CCG005974.1,CCG008041.1,CCG027906.1,CCG025208.1,CCG017078.1,CCG003362.1,CCG023723.1,CCG006992.1,CCG019382.1,CCG026413.3,CCG023474.1,CCG026871.2,CCG011533.1,CCG003767.1,CCG021911.1,CCG022281.1,CCG004819.1,CCG010905.1,CCG017622.1,CCG008270.1,CCG013537.1,CCG015625.1,CCG028653.1,CCG026795.1,CCG007005.1,CCG000588.1,CCG009822.1,CCG019571.1,CCG022706.1,CCG026487.1,CCG017366.1,CCG002452.1,CCG018788.1,CCG012083.1,CCG004859.1,CCG009263.1,CCG024119.1,CCG021159.1,CCG023686.1,CCG002198.1,CCG001579.1,CCG013641.1,CCG003563.1,CCG006089.1,CCG000133.1,CCG019647.1,CCG004927.1,CCG000911.1,CCG001876.1,CCG013465.1,CCG018688.1,CCG002937.1,CCG000789.1,CCG021426.1,CCG010912.1,CCG007669.1,CCG027289.1,CCG022496.1,CCG028556.1,CCG012844.1,CCG010136.1,CCG022449.1,CCG024000.1,CCG023854.1,CCG000487.1,CCG007523.1,CCG010112.1,CCG004986.1,CCG007750.2,CCG006479.1,CCG010656.1,CCG001395.1,CCG027736.1,CCG012500.1,CCG005627.1,CCG026778.1,CCG008383.1,CCG027000.1,CCG013123.1,CCG024760.1,CCG017891.1,CCG011015.1,CCG020320.1,CCG006081.1,CCG023046.1,CCG015167.1,CCG021720.1,CCG012959.1,CCG015869.2,CCG003009.1,CCG004647.1,CCG000807.1,CCG006050.2,CCG025369.1,CCG003566.1,CCG009923.1,CCG001440.1,CCG015800.2,CCG001789.1,CCG003775.1,CCG009928.1,CCG005635.1,CCG015908.2,CCG013491.1,CCG022749.1,CCG004912.1,CCG003955.1,CCG024058.1,CCG007724.1,CCG012229.1,CCG024679.1,CCG018742.1,CCG005920.1,CCG015312.2,CCG000490.1,CCG0052 |
|------------|-----------|--------------------------|----------------------------|----------|---------------------------------------------------------------------------------------------------------------------------------------------------------------------------------------------------------------------------------------------------------------------------------------------------------------------------------------------------------------------------------------------------------------------------------------------------------------------------------------------------------------------------------------------------------------------------------------------------------------------------------------------------------------------------------------------------------------------------------------------------------------------------------------------------------------------------------------------------------------------------------------------------------------------------------------------------------------------------------------------------------------------------------------------------------------------------------------------------------------------------------------------------------------------------------------------------------------------------------------------------------------------------------------------------------------------------------------------------------------------------------------------------------------------------------------------------------------------------------------------------------------------------------------------------------------------------------|

|            |                            |                          |                            |          |                                                                                                                                                                                                                                                                                                                                                                                                                                                                                                                                                                                                                                                                                                                                                                                                                                                                                                                                                                                                                                                                                                                                                                                                                                                                                                                                                                                                                                                                                                                                                                                 |
|------------|----------------------------|--------------------------|----------------------------|----------|---------------------------------------------------------------------------------------------------------------------------------------------------------------------------------------------------------------------------------------------------------------------------------------------------------------------------------------------------------------------------------------------------------------------------------------------------------------------------------------------------------------------------------------------------------------------------------------------------------------------------------------------------------------------------------------------------------------------------------------------------------------------------------------------------------------------------------------------------------------------------------------------------------------------------------------------------------------------------------------------------------------------------------------------------------------------------------------------------------------------------------------------------------------------------------------------------------------------------------------------------------------------------------------------------------------------------------------------------------------------------------------------------------------------------------------------------------------------------------------------------------------------------------------------------------------------------------|
| GO:0043227 | membrane-bounded organelle | 1047 of 3038 in the list | 1495 of 5465 in the genome | 2.24E-38 | CCG011932.1,CCG027068.1,CCG022266.1,CCG014871.1,CCG006549.1,CCG008767.3,CCG026106.1,CCG019811.1,CCG025256.1,CCG009428.1,CCG001292.1,CCG001404.1,CCG027906.1,CCG018432.1,CCG014866.1,CCG004932.1,CCG025208.1,CCG017078.1,CCG023723.1,CCG027127.1,CCG011533.1,CCG009103.1,CCG022824.1,CCG027193.1,CCG004853.1,CCG022281.1,CCG006554.2,CCG028046.1,CCG015625.1,CCG002930.1,CCG028653.1,CCG007005.1,CCG020286.1,CCG000136.1,CCG007800.1,CCG000588.1,CCG008144.1,CCG009822.1,CCG026982.1,CCG005191.1,CCG022706.1,CCG008871.1,CCG028568.1,CCG026487.1,CCG017366.1,CCG006484.1,CCG012083.1,CCG024437.1,CCG009263.1,CCG024119.1,CCG021159.1,CCG009386.1,CCG023686.1,CCG002198.1,CCG025990.1,CCG000133.1,CCG011239.1,CCG026228.2,CCG016399.1,CCG011097.1,CCG004927.1,CCG009805.2,CCG000911.1,CCG012584.1,CCG010962.1,CCG020063.1,CCG009823.1,CCG025255.1,CCG003193.1,CCG021426.1,CCG010912.1,CCG004955.1,CCG027289.1,CCG022496.1,CCG028556.1,CCG010136.1,CCG023854.1,CCG027472.1,CCG027023.1,CCG007523.1,CCG010112.1,CCG010656.1,CCG000730.2,CCG000209.1,CCG001395.1,CCG012500.1,CCG005627.1,CCG018669.1,CCG005594.1,CCG026778.1,CCG011550.1,CCG008383.1,CCG002106.1,CCG013123.1,CCG024760.1,CCG027257.1,CCG007522.1,CCG017891.1,CCG011015.1,CCG023046.1,CCG020281.1,CCG021720.1,CCG002332.1,CCG005993.1,CCG003009.1,CCG025115.1,CCG011228.1,CCG025369.1,CCG010797.1,CCG004008.1,CCG010138.1,CCG015800.2,CCG001789.1,CCG009928.1,CCG005635.1,CCG021221.1,CCG000593.1,CCG013491.1,CCG004912.1,CCG002199.1,CCG006328.1,CCG024058.1,CCG023939.1,CCG008308.1,CCG027040.1,CCG027197.1,CCG0251 |
|------------|----------------------------|--------------------------|----------------------------|----------|---------------------------------------------------------------------------------------------------------------------------------------------------------------------------------------------------------------------------------------------------------------------------------------------------------------------------------------------------------------------------------------------------------------------------------------------------------------------------------------------------------------------------------------------------------------------------------------------------------------------------------------------------------------------------------------------------------------------------------------------------------------------------------------------------------------------------------------------------------------------------------------------------------------------------------------------------------------------------------------------------------------------------------------------------------------------------------------------------------------------------------------------------------------------------------------------------------------------------------------------------------------------------------------------------------------------------------------------------------------------------------------------------------------------------------------------------------------------------------------------------------------------------------------------------------------------------------|

|            |                                          |                          |                            |          |                                                                                                                                                                                                                                                                                                                                                                                                                                                                                                                                                                                                                                                                                                                                                                                                                                                                                                                                                                                                                                                                                                                                                                                                                                                                                                                                                                                                                                                                                                                                                                                 |
|------------|------------------------------------------|--------------------------|----------------------------|----------|---------------------------------------------------------------------------------------------------------------------------------------------------------------------------------------------------------------------------------------------------------------------------------------------------------------------------------------------------------------------------------------------------------------------------------------------------------------------------------------------------------------------------------------------------------------------------------------------------------------------------------------------------------------------------------------------------------------------------------------------------------------------------------------------------------------------------------------------------------------------------------------------------------------------------------------------------------------------------------------------------------------------------------------------------------------------------------------------------------------------------------------------------------------------------------------------------------------------------------------------------------------------------------------------------------------------------------------------------------------------------------------------------------------------------------------------------------------------------------------------------------------------------------------------------------------------------------|
| GO:0043231 | intracellular membrane-bounded organelle | 1047 of 3038 in the list | 1495 of 5465 in the genome | 2.24E-38 | CCG011932.1,CCG027068.1,CCG022266.1,CCG014871.1,CCG006549.1,CCG008767.3,CCG026106.1,CCG019811.1,CCG025256.1,CCG009428.1,CCG001292.1,CCG001404.1,CCG027906.1,CCG018432.1,CCG014866.1,CCG004932.1,CCG025208.1,CCG017078.1,CCG023723.1,CCG027127.1,CCG011533.1,CCG009103.1,CCG022824.1,CCG027193.1,CCG004853.1,CCG022281.1,CCG006554.2,CCG028046.1,CCG015625.1,CCG002930.1,CCG028653.1,CCG007005.1,CCG020286.1,CCG000136.1,CCG007800.1,CCG000588.1,CCG008144.1,CCG009822.1,CCG026982.1,CCG005191.1,CCG022706.1,CCG008871.1,CCG028568.1,CCG026487.1,CCG017366.1,CCG006484.1,CCG012083.1,CCG024437.1,CCG009263.1,CCG024119.1,CCG021159.1,CCG009386.1,CCG023686.1,CCG002198.1,CCG025990.1,CCG000133.1,CCG011239.1,CCG026228.2,CCG016399.1,CCG011097.1,CCG004927.1,CCG009805.2,CCG000911.1,CCG012584.1,CCG010962.1,CCG020063.1,CCG009823.1,CCG025255.1,CCG003193.1,CCG021426.1,CCG010912.1,CCG004955.1,CCG027289.1,CCG022496.1,CCG028556.1,CCG010136.1,CCG023854.1,CCG027472.1,CCG027023.1,CCG007523.1,CCG010112.1,CCG010656.1,CCG000730.2,CCG000209.1,CCG001395.1,CCG012500.1,CCG005627.1,CCG018669.1,CCG005594.1,CCG026778.1,CCG011550.1,CCG008383.1,CCG002106.1,CCG013123.1,CCG024760.1,CCG027257.1,CCG007522.1,CCG017891.1,CCG011015.1,CCG023046.1,CCG020281.1,CCG021720.1,CCG002332.1,CCG005993.1,CCG003009.1,CCG025115.1,CCG011228.1,CCG025369.1,CCG010797.1,CCG004008.1,CCG010138.1,CCG015800.2,CCG001789.1,CCG009928.1,CCG005635.1,CCG021221.1,CCG000593.1,CCG013491.1,CCG004912.1,CCG002199.1,CCG006328.1,CCG024058.1,CCG023939.1,CCG008308.1,CCG027040.1,CCG027197.1,CCG0251 |
|------------|------------------------------------------|--------------------------|----------------------------|----------|---------------------------------------------------------------------------------------------------------------------------------------------------------------------------------------------------------------------------------------------------------------------------------------------------------------------------------------------------------------------------------------------------------------------------------------------------------------------------------------------------------------------------------------------------------------------------------------------------------------------------------------------------------------------------------------------------------------------------------------------------------------------------------------------------------------------------------------------------------------------------------------------------------------------------------------------------------------------------------------------------------------------------------------------------------------------------------------------------------------------------------------------------------------------------------------------------------------------------------------------------------------------------------------------------------------------------------------------------------------------------------------------------------------------------------------------------------------------------------------------------------------------------------------------------------------------------------|

|            |           |                          |                            |          |                                                                                                                                                                                                                                                                                                                                                                                                                                                                                                                                                                                                                                                                                                                                                                                                                                                                                                                                                                                                                                                                                                                                                                                                                                                                                                                                                                                                                                                                                                                                                                                 |
|------------|-----------|--------------------------|----------------------------|----------|---------------------------------------------------------------------------------------------------------------------------------------------------------------------------------------------------------------------------------------------------------------------------------------------------------------------------------------------------------------------------------------------------------------------------------------------------------------------------------------------------------------------------------------------------------------------------------------------------------------------------------------------------------------------------------------------------------------------------------------------------------------------------------------------------------------------------------------------------------------------------------------------------------------------------------------------------------------------------------------------------------------------------------------------------------------------------------------------------------------------------------------------------------------------------------------------------------------------------------------------------------------------------------------------------------------------------------------------------------------------------------------------------------------------------------------------------------------------------------------------------------------------------------------------------------------------------------|
| GO:0043226 | organelle | 1243 of 3038 in the list | 1930 of 5465 in the genome | 3.73E-20 | CCG014531.2,CCG011932.1,CCG027068.1,CCG022266.1,CCG014871.1,CCG004973.1,CCG006549.1,CCG008767.3,CCG026106.1,CCG005370.1,CCG019811.1,CCG025256.1,CCG009428.1,CCG001292.1,CCG003587.1,CCG001404.1,CCG027906.1,CCG018432.1,CCG014866.1,CCG004932.1,CCG025208.1,CCG017078.1,CCG023723.1,CCG026871.2,CCG027127.1,CCG011533.1,CCG009103.1,CCG022824.1,CCG027193.1,CCG004853.1,CCG021911.1,CCG022281.1,CCG010905.1,CCG006554.2,CCG028046.1,CCG008270.1,CCG015625.1,CCG002930.1,CCG028653.1,CCG007005.1,CCG020286.1,CCG000136.1,CCG007800.1,CCG000588.1,CCG008144.1,CCG009822.1,CCG026982.1,CCG005191.1,CCG022706.1,CCG008871.1,CCG028568.1,CCG026487.1,CCG017366.1,CCG018788.1,CCG006484.1,CCG012083.1,CCG024437.1,CCG009263.1,CCG024119.1,CCG021159.1,CCG009386.1,CCG023686.1,CCG002198.1,CCG021737.1,CCG025990.1,CCG000133.1,CCG011239.1,CCG026228.2,CCG016399.1,CCG011097.1,CCG004927.1,CCG009805.2,CCG000911.1,CCG012584.1,CCG010962.1,CCG020063.1,CCG009823.1,CCG027748.1,CCG025255.1,CCG003193.1,CCG021426.1,CCG010912.1,CCG004955.1,CCG027289.1,CCG022496.1,CCG028556.1,CCG010136.1,CCG023854.1,CCG027472.1,CCG027023.1,CCG007523.1,CCG010112.1,CCG006479.1,CCG010656.1,CCG000730.2,CCG000209.1,CCG001395.1,CCG012500.1,CCG005627.1,CCG018669.1,CCG005594.1,CCG026778.1,CCG011550.1,CCG008383.1,CCG002106.1,CCG013123.1,CCG019426.1,CCG009394.1,CCG024760.1,CCG027257.1,CCG007522.1,CCG017891.1,CCG011015.1,CCG023046.1,CCG015167.1,CCG020281.1,CCG021720.1,CCG002332.1,CCG024421.3,CCG005993.1,CCG003009.1,CCG025115.1,CCG011228.1,CCG025369.1,CCG024769.1,CCG010797.1,CCG0040 |
|------------|-----------|--------------------------|----------------------------|----------|---------------------------------------------------------------------------------------------------------------------------------------------------------------------------------------------------------------------------------------------------------------------------------------------------------------------------------------------------------------------------------------------------------------------------------------------------------------------------------------------------------------------------------------------------------------------------------------------------------------------------------------------------------------------------------------------------------------------------------------------------------------------------------------------------------------------------------------------------------------------------------------------------------------------------------------------------------------------------------------------------------------------------------------------------------------------------------------------------------------------------------------------------------------------------------------------------------------------------------------------------------------------------------------------------------------------------------------------------------------------------------------------------------------------------------------------------------------------------------------------------------------------------------------------------------------------------------|

|            |                         |                          |                            |          |                                                                                                                                                                                                                                                                                                                                                                                                                                                                                                                                                                                                                                                                                                                                                                                                                                                                                                                                                                                                                                                                                                                                                                                                                                                                                                                                                                                                                                                                                                                                                                                 |
|------------|-------------------------|--------------------------|----------------------------|----------|---------------------------------------------------------------------------------------------------------------------------------------------------------------------------------------------------------------------------------------------------------------------------------------------------------------------------------------------------------------------------------------------------------------------------------------------------------------------------------------------------------------------------------------------------------------------------------------------------------------------------------------------------------------------------------------------------------------------------------------------------------------------------------------------------------------------------------------------------------------------------------------------------------------------------------------------------------------------------------------------------------------------------------------------------------------------------------------------------------------------------------------------------------------------------------------------------------------------------------------------------------------------------------------------------------------------------------------------------------------------------------------------------------------------------------------------------------------------------------------------------------------------------------------------------------------------------------|
| GO:0043229 | intracellular organelle | 1243 of 3038 in the list | 1930 of 5465 in the genome | 3.73E-20 | CCG014531.2,CCG011932.1,CCG027068.1,CCG022266.1,CCG014871.1,CCG004973.1,CCG006549.1,CCG008767.3,CCG026106.1,CCG005370.1,CCG019811.1,CCG025256.1,CCG009428.1,CCG001292.1,CCG003587.1,CCG001404.1,CCG027906.1,CCG018432.1,CCG014866.1,CCG004932.1,CCG025208.1,CCG017078.1,CCG023723.1,CCG026871.2,CCG027127.1,CCG011533.1,CCG009103.1,CCG022824.1,CCG027193.1,CCG004853.1,CCG021911.1,CCG022281.1,CCG010905.1,CCG006554.2,CCG028046.1,CCG008270.1,CCG015625.1,CCG002930.1,CCG028653.1,CCG007005.1,CCG020286.1,CCG000136.1,CCG007800.1,CCG000588.1,CCG008144.1,CCG009822.1,CCG026982.1,CCG005191.1,CCG022706.1,CCG008871.1,CCG028568.1,CCG026487.1,CCG017366.1,CCG018788.1,CCG006484.1,CCG012083.1,CCG024437.1,CCG009263.1,CCG024119.1,CCG021159.1,CCG009386.1,CCG023686.1,CCG002198.1,CCG021737.1,CCG025990.1,CCG000133.1,CCG011239.1,CCG026228.2,CCG016399.1,CCG011097.1,CCG004927.1,CCG009805.2,CCG000911.1,CCG012584.1,CCG010962.1,CCG020063.1,CCG009823.1,CCG027748.1,CCG025255.1,CCG003193.1,CCG021426.1,CCG010912.1,CCG004955.1,CCG027289.1,CCG022496.1,CCG028556.1,CCG010136.1,CCG023854.1,CCG027472.1,CCG027023.1,CCG007523.1,CCG010112.1,CCG006479.1,CCG010656.1,CCG000730.2,CCG000209.1,CCG001395.1,CCG012500.1,CCG005627.1,CCG018669.1,CCG005594.1,CCG026778.1,CCG011550.1,CCG008383.1,CCG002106.1,CCG013123.1,CCG019426.1,CCG009394.1,CCG024760.1,CCG027257.1,CCG007522.1,CCG017891.1,CCG011015.1,CCG023046.1,CCG015167.1,CCG020281.1,CCG021720.1,CCG002332.1,CCG024421.3,CCG005993.1,CCG003009.1,CCG025115.1,CCG011228.1,CCG025369.1,CCG024769.1,CCG010797.1,CCG0040 |
|------------|-------------------------|--------------------------|----------------------------|----------|---------------------------------------------------------------------------------------------------------------------------------------------------------------------------------------------------------------------------------------------------------------------------------------------------------------------------------------------------------------------------------------------------------------------------------------------------------------------------------------------------------------------------------------------------------------------------------------------------------------------------------------------------------------------------------------------------------------------------------------------------------------------------------------------------------------------------------------------------------------------------------------------------------------------------------------------------------------------------------------------------------------------------------------------------------------------------------------------------------------------------------------------------------------------------------------------------------------------------------------------------------------------------------------------------------------------------------------------------------------------------------------------------------------------------------------------------------------------------------------------------------------------------------------------------------------------------------|



|            |                    |                          |                            |          |                                                                                                                                                                                                                                                                                                                                                                                                                                                                                                                                                                                                                                                                                                                                                                                                                                                                                                                                                                                                                                                                                                                                                                                                                                                                                                                                                                                                                                                                                                                                                                                 |
|------------|--------------------|--------------------------|----------------------------|----------|---------------------------------------------------------------------------------------------------------------------------------------------------------------------------------------------------------------------------------------------------------------------------------------------------------------------------------------------------------------------------------------------------------------------------------------------------------------------------------------------------------------------------------------------------------------------------------------------------------------------------------------------------------------------------------------------------------------------------------------------------------------------------------------------------------------------------------------------------------------------------------------------------------------------------------------------------------------------------------------------------------------------------------------------------------------------------------------------------------------------------------------------------------------------------------------------------------------------------------------------------------------------------------------------------------------------------------------------------------------------------------------------------------------------------------------------------------------------------------------------------------------------------------------------------------------------------------|
| GO:0044424 | intracellular part | 1454 of 3038 in the list | 2307 of 5465 in the genome | 4.36E-19 | CCG014531.2,CCG011932.1,CCG027068.1,CCG022266.1,CCG014396.1,CCG014871.1,CCG004973.1,CCG006549.1,CCG008767.3,CCG005079.1,CCG026106.1,CCG005370.1,CCG004595.1,CCG025108.1,CCG019811.1,CCG025256.1,CCG009428.1,CCG001292.1,CCG003587.1,CCG001404.1,CCG027906.1,CCG018432.1,CCG014866.1,CCG004932.1,CCG025208.1,CCG014519.1,CCG017078.1,CCG023723.1,CCG026413.3,CCG026871.2,CCG027127.1,CCG011533.1,CCG027796.1,CCG009103.1,CCG022824.1,CCG018533.1,CCG027193.1,CCG004853.1,CCG003767.1,CCG021911.1,CCG022281.1,CCG010905.1,CCG006554.2,CCG028046.1,CCG008270.1,CCG015625.1,CCG006714.1,CCG002930.1,CCG028653.1,CCG007005.1,CCG020286.1,CCG000136.1,CCG007800.1,CCG000588.1,CCG008144.1,CCG009822.1,CCG026982.1,CCG005191.1,CCG022706.1,CCG019571.1,CCG008871.1,CCG028568.1,CCG026487.1,CCG017366.1,CCG018788.1,CCG006484.1,CCG012083.1,CCG024437.1,CCG009263.1,CCG024119.1,CCG021159.1,CCG009386.1,CCG023686.1,CCG002198.1,CCG021737.1,CCG025990.1,CCG000133.1,CCG011239.1,CCG026228.2,CCG016399.1,CCG011097.1,CCG004927.1,CCG009805.2,CCG000911.1,CCG001876.1,CCG012584.1,CCG010962.1,CCG020063.1,CCG010024.1,CCG009823.1,CCG027748.1,CCG002937.1,CCG025255.1,CCG003193.1,CCG000789.1,CCG005588.1,CCG021426.1,CCG010912.1,CCG004955.1,CCG027289.1,CCG022496.1,CCG028556.1,CCG010136.1,CCG023854.1,CCG027472.1,CCG027023.1,CCG007523.1,CCG010112.1,CCG004986.1,CCG006479.1,CCG010656.1,CCG000730.2,CCG000209.1,CCG001395.1,CCG027736.1,CCG012500.1,CCG005627.1,CCG018669.1,CCG005594.1,CCG026778.1,CCG011550.1,CCG008383.1,CCG002106.1,CCG027316.1,CCG013123.1,CCG019426.1,CCG0093 |
| GO:0044428 | nuclear part       | 93 of 3038 in the list   | 115 of 5465 in the genome  | 2.13E-06 | CCG000158.1,CCG027068.1,CCG016237.1,CCG001809.1,CC                                                                                                                                                                                                                                                                                                                                                                                                                                                                                                                                                                                                                                                                                                                                                                                                                                                                                                                                                                                                                                                                                                                                                                                                                                                                                                                                                                                                                                                                                                                              |

|            |                  |                        |                          |         |                                                                                                                                                                                                                                                                                                                                                                         |
|------------|------------------|------------------------|--------------------------|---------|-------------------------------------------------------------------------------------------------------------------------------------------------------------------------------------------------------------------------------------------------------------------------------------------------------------------------------------------------------------------------|
| GO:0005635 | nuclear envelope | 21 of 3038 in the list | 21 of 5465 in the genome | 0.00117 | CCG010440.1,CCG011550.1,CCG008144.1,CCG009822.1,CCG001809.1,CCG000493.1,CCG012556.1,CCG013066.1,CCG022771.1,CCG009136.1,CCG020053.1,CCG028425.2,CCG026989.1,CCG004897.1,CCG006243.1,CCG008116.1,CCG017141.1,CCG023186.1,CCG003009.1,CCG017874.1,CCG017989.1                                                                                                             |
| GO:0005643 | nuclear pore     | 15 of 3038 in the list | 15 of 5465 in the genome | 0.04051 | CCG009136.1,CCG022771.1,CCG010440.1,CCG020053.1,CCG009822.1,CCG001809.1,CCG006243.1,CCG004897.1,CCG026989.1,CCG008116.1,CCG017141.1,CCG017874.1,CCG003009.1,CCG023186.1,CCG012556.1                                                                                                                                                                                     |
| GO:0046930 | pore complex     | 15 of 3038 in the list | 15 of 5465 in the genome | 0.04051 | CCG009136.1,CCG022771.1,CCG010440.1,CCG020053.1,CCG009822.1,CCG001809.1,CCG006243.1,CCG004897.1,CCG026989.1,CCG008116.1,CCG017141.1,CCG017874.1,CCG003009.1,CCG023186.1,CCG012556.1                                                                                                                                                                                     |
| GO:0005874 | microtubule      | 30 of 3038 in the list | 36 of 5465 in the genome | 0.11507 | CCG006420.1,CCG009543.1,CCG015289.1,CCG015784.1,CCG013000.1,CCG013637.1,CCG026823.1,CCG023682.1,CCG002099.1,CCG016370.1,CCG010418.1,CCG005886.1,CCG005370.1,CCG009080.1,CCG010864.1,CCG002852.1,CCG009243.1,CCG019028.1,CCG025396.1,CCG019029.1,CCG007532.1,CCG002696.1,CCG007531.1,CCG018820.3,CCG002137.1,CCG027236.1,CCG010538.1,CCG008748.1,CCG023963.3,CCG006421.1 |

|            |                |                         |                           |        |                                                                                                                                                                                                                                                                                                                                                                                                                                                                                                                                                                                                                                                                                                                                                                                                                                                                                                                                                                                                                                                                                                                                                                                                                                                                                                                                                                                                                                                                                                                                                                                |
|------------|----------------|-------------------------|---------------------------|--------|--------------------------------------------------------------------------------------------------------------------------------------------------------------------------------------------------------------------------------------------------------------------------------------------------------------------------------------------------------------------------------------------------------------------------------------------------------------------------------------------------------------------------------------------------------------------------------------------------------------------------------------------------------------------------------------------------------------------------------------------------------------------------------------------------------------------------------------------------------------------------------------------------------------------------------------------------------------------------------------------------------------------------------------------------------------------------------------------------------------------------------------------------------------------------------------------------------------------------------------------------------------------------------------------------------------------------------------------------------------------------------------------------------------------------------------------------------------------------------------------------------------------------------------------------------------------------------|
| GO:0044422 | organelle part | 351 of 3038 in the list | 565 of 5465 in the genome | 0.1463 | CCG011932.1,CCG020245.1,CCG027068.1,CCG018536.1,CCG010159.1,CCG001809.1,CCG011675.1,CCG000585.1,CCG010647.1,CCG000205.1,CCG005370.1,CCG026882.1,CCG020879.1,CCG021053.1,CCG026473.1,CCG001167.1,CCG004091.1,CCG001292.1,CCG017614.1,CCG019217.1,CCG028326.3,CCG028505.1,CCG025223.1,CCG006134.1,CCG005194.1,CCG014836.1,CCG024177.1,CCG012514.1,CCG027196.1,CCG016370.1,CCG015998.1,CCG023053.1,CCG021911.1,CCG010905.1,CCG028046.1,CCG019210.1,CCG011862.1,CCG011764.1,CCG010909.1,CCG002930.1,CCG008808.1,CCG014195.1,CCG028653.1,CCG017580.1,CCG009980.1,CCG008144.1,CCG01863.1,CCG009822.1,CCG013131.1,CCG010649.1,CCG012534.1,CCG007647.1,CCG004331.1,CCG025396.1,CCG006484.1,CCG021633.1,CCG019029.1,CCG008559.1,CCG024119.1,CCG001461.1,CCG027696.1,CCG023686.1,CCG021737.1,CCG014304.1,CCG009543.1,CCG004494.1,CCG003104.1,CCG021228.1,CCG022673.1,CCG026159.1,CCG016399.1,CCG000552.1,CCG004927.1,CCG009805.2,CCG012556.1,CCG002852.1,CCG002966.1,CCG012584.1,CCG021895.1,CCG017141.1,CCG025747.1,CCG027748.1,CCG024788.1,CCG005168.1,CCG018184.1,CCG018315.1,CCG007336.1,CCG003707.1,CCG027692.1,CCG000210.1,CCG010136.1,CCG003310.1,CCG004806.1,CCG004459.2,CCG013617.1,CCG022802.1,CCG010112.1,CCG004084.1,CCG010137.1,CCG022398.1,CCG006421.1,CCG009461.1,CCG023963.3,CCG023184.1,CCG004155.2,CCG022209.1,CCG011550.1,CCG014772.1,CCG015426.1,CCG000148.1,CCG002790.1,CCG000535.1,CCG009394.1,CCG024760.1,CCG024813.1,CCG025549.1,CCG011015.1,CCG027950.1,CCG026989.1,CCG016431.1,CCG024421.3,CCG003009.1,CCG010178.1,CCG000102.1,CCG026688.1,CCG004762.2,CCG0109 |
|------------|----------------|-------------------------|---------------------------|--------|--------------------------------------------------------------------------------------------------------------------------------------------------------------------------------------------------------------------------------------------------------------------------------------------------------------------------------------------------------------------------------------------------------------------------------------------------------------------------------------------------------------------------------------------------------------------------------------------------------------------------------------------------------------------------------------------------------------------------------------------------------------------------------------------------------------------------------------------------------------------------------------------------------------------------------------------------------------------------------------------------------------------------------------------------------------------------------------------------------------------------------------------------------------------------------------------------------------------------------------------------------------------------------------------------------------------------------------------------------------------------------------------------------------------------------------------------------------------------------------------------------------------------------------------------------------------------------|

|            |                              |                         |                           |        |                                                                                                                                                                                                                                                                                                                                                                                                                                                                                                                                                                                                                                                                                                                                                                                                                                                                                                                                                                                                                                                                                                                                                                                                                                                                                                                                                                                                                                                                                                                                                                                |
|------------|------------------------------|-------------------------|---------------------------|--------|--------------------------------------------------------------------------------------------------------------------------------------------------------------------------------------------------------------------------------------------------------------------------------------------------------------------------------------------------------------------------------------------------------------------------------------------------------------------------------------------------------------------------------------------------------------------------------------------------------------------------------------------------------------------------------------------------------------------------------------------------------------------------------------------------------------------------------------------------------------------------------------------------------------------------------------------------------------------------------------------------------------------------------------------------------------------------------------------------------------------------------------------------------------------------------------------------------------------------------------------------------------------------------------------------------------------------------------------------------------------------------------------------------------------------------------------------------------------------------------------------------------------------------------------------------------------------------|
| GO:0044446 | intracellular organelle part | 351 of 3038 in the list | 565 of 5465 in the genome | 0.1463 | CCG011932.1,CCG020245.1,CCG027068.1,CCG018536.1,CCG010159.1,CCG001809.1,CCG011675.1,CCG000585.1,CCG010647.1,CCG000205.1,CCG005370.1,CCG026882.1,CCG020879.1,CCG021053.1,CCG026473.1,CCG001167.1,CCG004091.1,CCG001292.1,CCG017614.1,CCG019217.1,CCG028326.3,CCG028505.1,CCG025223.1,CCG006134.1,CCG005194.1,CCG014836.1,CCG024177.1,CCG012514.1,CCG027196.1,CCG016370.1,CCG015998.1,CCG023053.1,CCG021911.1,CCG010905.1,CCG028046.1,CCG019210.1,CCG011862.1,CCG011764.1,CCG010909.1,CCG002930.1,CCG008808.1,CCG014195.1,CCG028653.1,CCG017580.1,CCG009980.1,CCG008144.1,CCG01863.1,CCG009822.1,CCG013131.1,CCG010649.1,CCG012534.1,CCG007647.1,CCG004331.1,CCG025396.1,CCG006484.1,CCG021633.1,CCG019029.1,CCG008559.1,CCG024119.1,CCG001461.1,CCG027696.1,CCG023686.1,CCG021737.1,CCG014304.1,CCG009543.1,CCG004494.1,CCG003104.1,CCG021228.1,CCG022673.1,CCG026159.1,CCG016399.1,CCG000552.1,CCG004927.1,CCG009805.2,CCG012556.1,CCG002852.1,CCG002966.1,CCG012584.1,CCG021895.1,CCG017141.1,CCG025747.1,CCG027748.1,CCG024788.1,CCG005168.1,CCG018184.1,CCG018315.1,CCG007336.1,CCG003707.1,CCG027692.1,CCG000210.1,CCG010136.1,CCG003310.1,CCG004806.1,CCG004459.2,CCG013617.1,CCG022802.1,CCG010112.1,CCG004084.1,CCG010137.1,CCG022398.1,CCG006421.1,CCG009461.1,CCG023963.3,CCG023184.1,CCG004155.2,CCG022209.1,CCG011550.1,CCG014772.1,CCG015426.1,CCG000148.1,CCG002790.1,CCG000535.1,CCG009394.1,CCG024760.1,CCG024813.1,CCG025549.1,CCG011015.1,CCG027950.1,CCG026989.1,CCG016431.1,CCG024421.3,CCG003009.1,CCG010178.1,CCG000102.1,CCG026688.1,CCG004762.2,CCG0109 |
|------------|------------------------------|-------------------------|---------------------------|--------|--------------------------------------------------------------------------------------------------------------------------------------------------------------------------------------------------------------------------------------------------------------------------------------------------------------------------------------------------------------------------------------------------------------------------------------------------------------------------------------------------------------------------------------------------------------------------------------------------------------------------------------------------------------------------------------------------------------------------------------------------------------------------------------------------------------------------------------------------------------------------------------------------------------------------------------------------------------------------------------------------------------------------------------------------------------------------------------------------------------------------------------------------------------------------------------------------------------------------------------------------------------------------------------------------------------------------------------------------------------------------------------------------------------------------------------------------------------------------------------------------------------------------------------------------------------------------------|

|            |                               |                        |                          |         |                                                                                                                                                                                                                                                                                                                                                                                                                                                                                                                                                                                                                                                                                                                                     |
|------------|-------------------------------|------------------------|--------------------------|---------|-------------------------------------------------------------------------------------------------------------------------------------------------------------------------------------------------------------------------------------------------------------------------------------------------------------------------------------------------------------------------------------------------------------------------------------------------------------------------------------------------------------------------------------------------------------------------------------------------------------------------------------------------------------------------------------------------------------------------------------|
| GO:0043233 | organelle lumen               | 59 of 3038 in the list | 81 of 5465 in the genome | 0.26772 | CCG000158.1,CCG021083.1,CCG004762.2,CCG016237.1,CCG011675.1,CCG026219.1,CCG017156.1,CCG000728.1,CCG020695.1,CCG026882.1,CCG007647.1,CCG006484.1,CCG003055.1,CCG021633.1,CCG023775.1,CCG010112.1,CCG011094.1,CCG019745.1,CCG016772.1,CCG017046.2,CCG014682.1,CCG001461.1,CCG001292.1,CCG011083.1,CCG020460.1,CCG028326.3,CCG028505.1,CCG000806.1,CCG006134.1,CCG023184.1,CCG025107.1,CCG024588.1,CCG007908.3,CCG001726.1,CCG002792.1,CCG016399.1,CCG024666.1,CCG028222.1,CCG015998.1,CCG010175.1,CCG009805.2,CCG025828.1,CCG016656.1,CCG017524.1,CCG023053.1,CCG027950.1,CCG001913.1,CCG002374.1,CCG025856.1,CCG019814.1,CCG001096.1,CCG010318.1,CCG025747.1,CCG014195.1,CCG028653.1,CCG005168.1,CCG018184.1,CCG018315.1,CCG011957.1 |
| GO:0070013 | intracellular organelle lumen | 59 of 3038 in the list | 81 of 5465 in the genome | 0.26772 | CCG000158.1,CCG021083.1,CCG004762.2,CCG016237.1,CCG011675.1,CCG026219.1,CCG017156.1,CCG000728.1,CCG020695.1,CCG026882.1,CCG007647.1,CCG006484.1,CCG003055.1,CCG021633.1,CCG023775.1,CCG010112.1,CCG011094.1,CCG019745.1,CCG016772.1,CCG017046.2,CCG014682.1,CCG001461.1,CCG001292.1,CCG011083.1,CCG020460.1,CCG028326.3,CCG028505.1,CCG000806.1,CCG006134.1,CCG023184.1,CCG025107.1,CCG024588.1,CCG007908.3,CCG001726.1,CCG002792.1,CCG016399.1,CCG024666.1,CCG028222.1,CCG015998.1,CCG010175.1,CCG009805.2,CCG025828.1,CCG016656.1,CCG017524.1,CCG023053.1,CCG027950.1,CCG001913.1,CCG002374.1,CCG025856.1,CCG019814.1,CCG001096.1,CCG010318.1,CCG025747.1,CCG014195.1,CCG028653.1,CCG005168.1,CCG018184.1,CCG018315.1,CCG011957.1 |

|            |                          |                        |                          |         |                                                                                                                                                                                                                                                                                                                                                                                                                                                                                                                                                                                                                                                                         |
|------------|--------------------------|------------------------|--------------------------|---------|-------------------------------------------------------------------------------------------------------------------------------------------------------------------------------------------------------------------------------------------------------------------------------------------------------------------------------------------------------------------------------------------------------------------------------------------------------------------------------------------------------------------------------------------------------------------------------------------------------------------------------------------------------------------------|
| GO:0031981 | nuclear lumen            | 53 of 3038 in the list | 72 of 5465 in the genome | 0.32068 | CCG000158.1,CCG021083.1,CCG004762.2,CCG016237.1,CCG011675.1,CCG026219.1,CCG017156.1,CCG020695.1,CCG026882.1,CCG007647.1,CCG006484.1,CCG003055.1,CCG021633.1,CCG023775.1,CCG011094.1,CCG019745.1,CCG016772.1,CCG017046.2,CCG014682.1,CCG001461.1,CCG001292.1,CCG011083.1,CCG020460.1,CCG028326.3,CCG000806.1,CCG006134.1,CCG023184.1,CCG024588.1,CCG007908.3,CCG001726.1,CCG002792.1,CCG024666.1,CCG028222.1,CCG015998.1,CCG010175.1,CCG009805.2,CCG025828.1,CCG016656.1,CCG017524.1,CCG027950.1,CCG001913.1,CCG023053.1,CCG025856.1,CCG019814.1,CCG010318.1,CCG001096.1,CCG025747.1,CCG014195.1,CCG028653.1,CCG005168.1,CCG018184.1,CCG018315.1,CCG011957.1             |
| GO:0015630 | microtubule cytoskeleton | 54 of 3038 in the list | 74 of 5465 in the genome | 0.40602 | CCG015570.1,CCG006420.1,CCG026688.1,CCG015784.1,CCG013000.1,CCG013637.1,CCG026823.1,CCG023488.2,CCG023682.1,CCG012733.1,CCG019140.1,CCG003707.1,CCG010418.1,CCG005370.1,CCG009080.1,CCG009243.1,CCG027167.1,CCG019028.1,CCG025396.1,CCG019029.1,CCG001167.1,CCG002696.1,CCG025520.1,CCG021448.1,CCG027236.1,CCG008748.1,CCG006421.1,CCG023963.3,CCG016119.1,CCG009543.1,CCG015289.1,CCG002099.1,CCG003104.1,CCG005525.1,CCG021228.1,CCG016370.1,CCG019329.1,CCG005886.1,CCG000535.1,CCG022536.3,CCG002852.1,CCG010864.1,CCG021317.1,CCG008377.1,CCG007532.1,CCG007531.1,CCG021895.1,CCG018820.3,CCG002137.1,CCG019092.1,CCG024421.3,CCG010538.1,CCG008346.1,CCG018918.1 |

|            |                                          |                        |                           |         |                                                                                                                                                                                                                                                                                                                                                                                                                                                                                                                                                                                                                                                                                                                                                                                                                                                                                     |
|------------|------------------------------------------|------------------------|---------------------------|---------|-------------------------------------------------------------------------------------------------------------------------------------------------------------------------------------------------------------------------------------------------------------------------------------------------------------------------------------------------------------------------------------------------------------------------------------------------------------------------------------------------------------------------------------------------------------------------------------------------------------------------------------------------------------------------------------------------------------------------------------------------------------------------------------------------------------------------------------------------------------------------------------|
| GO:0044430 | cytoskeletal part                        | 71 of 3038 in the list | 101 of 5465 in the genome | 0.43948 | CCG015570.1,CCG006420.1,CCG013000.1,CCG026823.1,CCG023488.2,CCG003707.1,CCG004786.1,CCG019356.1,CCG005370.1,CCG009243.1,CCG019028.1,CCG004459.2,CCG004084.1,CCG001167.1,CCG002696.1,CCG025520.1,CCG002831.1,CCG027236.1,CCG006421.1,CCG023963.3,CCG012081.1,CCG002099.1,CCG015426.1,CCG016370.1,CCG000535.1,CCG022536.3,CCG010459.3,CCG021911.1,CCG007532.1,CCG008377.1,CCG007531.1,CCG018820.3,CCG010538.1,CCG024421.3,CCG011764.1,CCG008346.1,CCG026688.1,CCG015784.1,CCG013637.1,CCG023682.1,CCG024769.1,CCG012733.1,CCG019140.1,CCG010418.1,CCG024834.3,CCG009080.1,CCG027167.1,CCG025396.1,CCG000603.1,CCG019029.1,CCG021448.1,CCG008748.1,CCG009543.1,CCG016119.1,CCG015289.1,CCG003104.1,CCG021228.1,CCG005525.1,CCG019329.1,CCG005886.1,CCG023696.1,CCG002852.1,CCG010864.1,CCG021317.1,CCG026558.1,CCG021895.1,CCG002137.1,CCG019092.1,CCG008834.1,CCG016660.1,CCG018918.1 |
| GO:0030286 | dynein complex                           | 14 of 3038 in the list | 15 of 5465 in the genome  | 0.52826 | CCG016119.1,CCG021317.1,CCG001167.1,CCG008377.1,CCG023488.2,CCG021895.1,CCG012733.1,CCG025520.1,CCG005525.1,CCG021228.1,CCG003707.1,CCG019329.1,CCG008346.1,CCG018918.1                                                                                                                                                                                                                                                                                                                                                                                                                                                                                                                                                                                                                                                                                                             |
| GO:0045259 | proton-transporting ATP synthase complex | 14 of 3038 in the list | 15 of 5465 in the genome  | 0.52826 | CCG015410.1,CCG002038.1,CCG025107.1,CCG010112.1,CCG009142.1,CCG023640.1,CCG000148.1,CCG025348.1,CCG007724.1,CCG021934.1,CCG019619.1,CCG005924.2,CCG013643.1,CCG008422.1                                                                                                                                                                                                                                                                                                                                                                                                                                                                                                                                                                                                                                                                                                             |
| GO:0019866 | organelle inner membrane                 | 30 of 3038 in the list | 38 of 5465 in the genome  | 0.63517 | CCG004155.2,CCG005677.1,CCG011932.1,CCG000102.1,CCG015410.1,CCG007862.1,CCG020245.1,CCG018684.1,CCG025107.1,CCG009142.1,CCG019590.1,CCG000148.1,CCG002790.1,CCG000205.1,CCG011381.1,CCG005924.2,CCG010939.1,CCG022802.1,CCG010112.1,CCG028425.2,CCG024119.1,CCG014053.1,CCG017614.1,CCG016304.1,CCG017125.1,CCG006459.1,CCG026514.1,CCG025163.3,CCG013643.1,CCG017989.1                                                                                                                                                                                                                                                                                                                                                                                                                                                                                                             |

|            |                              |                        |                          |         |                                                                                                                                                                                                                                                                                                                                                                                                                                                                                                                                                                                                                                                                                                                                                                         |
|------------|------------------------------|------------------------|--------------------------|---------|-------------------------------------------------------------------------------------------------------------------------------------------------------------------------------------------------------------------------------------------------------------------------------------------------------------------------------------------------------------------------------------------------------------------------------------------------------------------------------------------------------------------------------------------------------------------------------------------------------------------------------------------------------------------------------------------------------------------------------------------------------------------------|
| GO:0030684 | preribosome                  | 10 of 3038 in the list | 10 of 5465 in the genome | 0.76992 | CCG023263.1,CCG009214.1,CCG005176.1,CCG002735.1,CCG027579.1,CCG007962.1,CCG018636.1,CCG006357.1,CCG018474.1,CCG022629.1                                                                                                                                                                                                                                                                                                                                                                                                                                                                                                                                                                                                                                                 |
| GO:0031967 | organelle envelope           | 62 of 3038 in the list | 88 of 5465 in the genome | 0.78362 | CCG011932.1,CCG000102.1,CCG020245.1,CCG010159.1,CCG008144.1,CCG009822.1,CCG001809.1,CCG019590.1,CCG000205.1,CCG020949.1,CCG011381.1,CCG013066.1,CCG022771.1,CCG009136.1,CCG020879.1,CCG022802.1,CCG010112.1,CCG028425.2,CCG024119.1,CCG023814.2,CCG006243.1,CCG004897.1,CCG017614.1,CCG026240.1,CCG013013.1,CCG016304.1,CCG006459.1,CCG023186.1,CCG004605.1,CCG013643.1,CCG010440.1,CCG004155.2,CCG005677.1,CCG007246.2,CCG015410.1,CCG007862.1,CCG018684.1,CCG011550.1,CCG025107.1,CCG009142.1,CCG018128.1,CCG000493.1,CCG001279.1,CCG000148.1,CCG002790.1,CCG005924.2,CCG012556.1,CCG019712.1,CCG010939.1,CCG020053.1,CCG014053.1,CCG026989.1,CCG008116.1,CCG017125.1,CCG017141.1,CCG016431.1,CCG000089.1,CCG026514.1,CCG017874.1,CCG003009.1,CCG025163.3,CCG017989.1 |
| GO:0005743 | mitochondrial inner membrane | 28 of 3038 in the list | 36 of 5465 in the genome | 1       | CCG004155.2,CCG005677.1,CCG011932.1,CCG000102.1,CCG015410.1,CCG007862.1,CCG020245.1,CCG018684.1,CCG025107.1,CCG009142.1,CCG019590.1,CCG000148.1,CCG002790.1,CCG000205.1,CCG011381.1,CCG005924.2,CCG010939.1,CCG022802.1,CCG010112.1,CCG024119.1,CCG014053.1,CCG017614.1,CCG016304.1,CCG017125.1,CCG006459.1,CCG026514.1,CCG025163.3,CCG013643.1                                                                                                                                                                                                                                                                                                                                                                                                                         |
| GO:0005667 | transcription factor complex | 23 of 3038 in the list | 29 of 5465 in the genome | 1       | CCG027258.1,CCG000158.1,CCG017793.1,CCG011228.1,CCG022741.1,CCG001698.1,CCG012536.1,CCG016307.1,CCG027796.1,CCG009805.2,CCG010175.1,CCG019250.1,CCG018533.1,CCG025549.1,CCG027950.1,CCG011229.1,CCG001292.1,CCG005480.2,CCG011083.1,CCG022398.1,CCG020460.1,CCG018184.1,CCG023184.1                                                                                                                                                                                                                                                                                                                                                                                                                                                                                     |
| GO:0005730 | nucleolus                    | 8 of 3038 in the list  | 8 of 5465 in the genome  | 1       | CCG001726.1,CCG002792.1,CCG003055.1,CCG023053.1,CCG007908.3,CCG028653.1,CCG015998.1,CCG011957.1                                                                                                                                                                                                                                                                                                                                                                                                                                                                                                                                                                                                                                                                         |



|            |                                       |                        |                          |   |                                                                                                                                                                                                                                                                                                                                                                                                                                                                                                                                                                                                                                                                                                                                                 |
|------------|---------------------------------------|------------------------|--------------------------|---|-------------------------------------------------------------------------------------------------------------------------------------------------------------------------------------------------------------------------------------------------------------------------------------------------------------------------------------------------------------------------------------------------------------------------------------------------------------------------------------------------------------------------------------------------------------------------------------------------------------------------------------------------------------------------------------------------------------------------------------------------|
| GO:0032040 | small-subunit processome              | 8 of 3038 in the list  | 8 of 5465 in the genome  | 1 | CCG009214.1,CCG005176.1,CCG002735.1,CCG027579.1,CCG007962.1,CCG018636.1,CCG006357.1,CCG022629.1                                                                                                                                                                                                                                                                                                                                                                                                                                                                                                                                                                                                                                                 |
| GO:0000152 | nuclear ubiquitin ligase complex      | 7 of 3038 in the list  | 7 of 5465 in the genome  | 1 | CCG004331.1,CCG002269.1,CCG027068.1,CCG007403.1,CCG008808.1,CCG028046.1,CCG018116.1                                                                                                                                                                                                                                                                                                                                                                                                                                                                                                                                                                                                                                                             |
| GO:0005680 | anaphase-promoting complex            | 7 of 3038 in the list  | 7 of 5465 in the genome  | 1 | CCG004331.1,CCG002269.1,CCG027068.1,CCG007403.1,CCG008808.1,CCG028046.1,CCG018116.1                                                                                                                                                                                                                                                                                                                                                                                                                                                                                                                                                                                                                                                             |
| GO:0005753 | mitochondrial proton-transporting ATP | 7 of 3038 in the list  | 7 of 5465 in the genome  | 1 | CCG015410.1,CCG000148.1,CCG025107.1,CCG010112.1,CCG009142.1,CCG013643.1,CCG005924.2                                                                                                                                                                                                                                                                                                                                                                                                                                                                                                                                                                                                                                                             |
| GO:0031974 | membrane-enclosed lumen               | 60 of 3038 in the list | 90 of 5465 in the genome | 1 | CCG000158.1,CCG021083.1,CCG004762.2,CCG016237.1,CCG011675.1,CCG026219.1,CCG017156.1,CCG020949.1,CCG000728.1,CCG020695.1,CCG026882.1,CCG007647.1,CCG006484.1,CCG003055.1,CCG021633.1,CCG023775.1,CCG010112.1,CCG011094.1,CCG019745.1,CCG016772.1,CCG017046.2,CCG014682.1,CCG001461.1,CCG001292.1,CCG011083.1,CCG020460.1,CCG028326.3,CCG028505.1,CCG000806.1,CCG006134.1,CCG023184.1,CCG025107.1,CCG024588.1,CCG007908.3,CCG001726.1,CCG002792.1,CCG016399.1,CCG024666.1,CCG028222.1,CCG015998.1,CCG010175.1,CCG009805.2,CCG025828.1,CCG016656.1,CCG017524.1,CCG023053.1,CCG027950.1,CCG001913.1,CCG002374.1,CCG025856.1,CCG019814.1,CCG001096.1,CCG010318.1,CCG025747.1,CCG014195.1,CCG028653.1,CCG005168.1,CCG018184.1,CCG018315.1,CCG011957.1 |
| GO:0005654 | nucleoplasm                           | 38 of 3038 in the list | 55 of 5465 in the genome | 1 | CCG000158.1,CCG021083.1,CCG004762.2,CCG026219.1,CCG017156.1,CCG020695.1,CCG026882.1,CCG007647.1,CCG006484.1,CCG021633.1,CCG023775.1,CCG011094.1,CCG019745.1,CCG016772.1,CCG017046.2,CCG014682.1,CCG001292.1,CCG011083.1,CCG020460.1,CCG028326.3,CCG006134.1,CCG023184.1,CCG024666.1,CCG010175.1,CCG009805.2,CCG016656.1,CCG025828.1,CCG017524.1,CCG027950.1,CCG025856.1,CCG019814.1,CCG010318.1,CCG001096.1,CCG025747.1,CCG014195.1,CCG018184.1,CCG005168.1,CCG018315.1                                                                                                                                                                                                                                                                         |

|            |                                       |                        |                          |   |                                                                                                                                                                                                                                                                                                                                                                                                                                                                         |
|------------|---------------------------------------|------------------------|--------------------------|---|-------------------------------------------------------------------------------------------------------------------------------------------------------------------------------------------------------------------------------------------------------------------------------------------------------------------------------------------------------------------------------------------------------------------------------------------------------------------------|
| GO:0044451 | nucleoplasm part                      | 38 of 3038 in the list | 55 of 5465 in the genome | 1 | CCG000158.1,CCG021083.1,CCG004762.2,CCG026219.1,CCG017156.1,CCG020695.1,CCG026882.1,CCG007647.1,CCG006484.1,CCG021633.1,CCG023775.1,CCG011094.1,CCG019745.1,CCG016772.1,CCG017046.2,CCG014682.1,CCG001292.1,CCG011083.1,CCG020460.1,CCG028326.3,CCG006134.1,CCG023184.1,CCG024666.1,CCG010175.1,CCG009805.2,CCG016656.1,CCG025828.1,CCG017524.1,CCG027950.1,CCG025856.1,CCG019814.1,CCG010318.1,CCG001096.1,CCG025747.1,CCG014195.1,CCG018184.1,CCG005168.1,CCG018315.1 |
| GO:0045263 | proton-transporting ATP synthase      | 6 of 3038 in the list  | 6 of 5465 in the genome  | 1 | CCG000148.1,CCG025107.1,CCG010112.1,CCG009142.1,CCG013643.1,CCG008422.1                                                                                                                                                                                                                                                                                                                                                                                                 |
| GO:0045261 | proton-transporting ATP synthase      | 8 of 3038 in the list  | 9 of 5465 in the genome  | 1 | CCG015410.1,CCG002038.1,CCG023640.1,CCG007724.1,CCG025348.1,CCG019619.1,CCG021934.1,CCG005924.2                                                                                                                                                                                                                                                                                                                                                                         |
| GO:0044455 | mitochondrial membrane part           | 16 of 3038 in the list | 21 of 5465 in the genome | 1 | CCG011932.1,CCG015410.1,CCG007862.1,CCG025107.1,CCG009142.1,CCG019590.1,CCG000148.1,CCG011381.1,CCG005924.2,CCG010939.1,CCG010112.1,CCG017614.1,CCG017125.1,CCG016304.1,CCG026514.1,CCG013643.1                                                                                                                                                                                                                                                                         |
| GO:0000276 | mitochondrial proton-transporting ATP | 5 of 3038 in the list  | 5 of 5465 in the genome  | 1 | CCG000148.1,CCG025107.1,CCG010112.1,CCG009142.1,CCG013643.1                                                                                                                                                                                                                                                                                                                                                                                                             |

|            |                                             |                        |                           |   |                                                                                                                                                                                                                                                                                                                                                                                                                                                                                                                                                                                                                                                                                                                                                                                                                                                                                                                                                 |
|------------|---------------------------------------------|------------------------|---------------------------|---|-------------------------------------------------------------------------------------------------------------------------------------------------------------------------------------------------------------------------------------------------------------------------------------------------------------------------------------------------------------------------------------------------------------------------------------------------------------------------------------------------------------------------------------------------------------------------------------------------------------------------------------------------------------------------------------------------------------------------------------------------------------------------------------------------------------------------------------------------------------------------------------------------------------------------------------------------|
| GO:1902494 | catalytic complex                           | 76 of 3038 in the list | 121 of 5465 in the genome | 1 | CCG022047.1,CCG000789.1,CCG003060.1,CCG000158.1,CCG027068.1,CCG023488.2,CCG003707.1,CCG024695.1,CCG019599.1,CCG018116.1,CCG019745.1,CCG004091.1,CCG001167.1,CCG006505.1,CCG001292.1,CCG025520.1,CCG009685.1,CCG022453.1,CCG028505.1,CCG027539.1,CCG024232.1,CCG007485.1,CCG023184.1,CCG001101.1,CCG028615.1,CCG003362.1,CCG027316.1,CCG020230.3,CCG011658.1,CCG027950.1,CCG008377.1,CCG028046.1,CCG015929.1,CCG012959.1,CCG025277.1,CCG019558.1,CCG008808.1,CCG014195.1,CCG004134.1,CCG008346.1,CCG026212.1,CCG003215.3,CCG021083.1,CCG019394.1,CCG012733.1,CCG004212.1,CCG019571.1,CCG026146.1,CCG011382.1,CCG016189.1,CCG004331.1,CCG006484.1,CCG023775.1,CCG017046.2,CCG011083.1,CCG002269.1,CCG020460.1,CCG016119.1,CCG005525.1,CCG021228.1,CCG019329.1,CCG022214.1,CCG010175.1,CCG009805.2,CCG006884.1,CCG016656.1,CCG021317.1,CCG008557.1,CCG007403.1,CCG014228.2,CCG018688.1,CCG021895.1,CCG003192.1,CCG025747.1,CCG018184.1,CCG018918.1 |
| GO:0000808 | origin recognition complex                  | 7 of 3038 in the list  | 8 of 5465 in the genome   | 1 | CCG004012.2,CCG002942.1,CCG020652.1,CCG016237.1,CCG028222.1,CCG016576.1,CCG007336.1                                                                                                                                                                                                                                                                                                                                                                                                                                                                                                                                                                                                                                                                                                                                                                                                                                                             |
| GO:0005732 | small nucleolar                             | 4 of 3038 in the list  | 4 of 5465 in the genome   | 1 | CCG002792.1,CCG023511.1,CCG007636.1,CCG028653.1                                                                                                                                                                                                                                                                                                                                                                                                                                                                                                                                                                                                                                                                                                                                                                                                                                                                                                 |
| GO:0000428 | DNA-directed RNA polymerase complex         | 13 of 3038 in the list | 18 of 5465 in the genome  | 1 | CCG000158.1,CCG006484.1,CCG021083.1,CCG027950.1,CCG023775.1,CCG017046.2,CCG001292.1,CCG011083.1,CCG020460.1,CCG009805.2,CCG010175.1,CCG018184.1,CCG023184.1                                                                                                                                                                                                                                                                                                                                                                                                                                                                                                                                                                                                                                                                                                                                                                                     |
| GO:0030880 | RNA polymerase complex                      | 13 of 3038 in the list | 18 of 5465 in the genome  | 1 | CCG000158.1,CCG006484.1,CCG021083.1,CCG027950.1,CCG023775.1,CCG017046.2,CCG001292.1,CCG011083.1,CCG020460.1,CCG009805.2,CCG010175.1,CCG018184.1,CCG023184.1                                                                                                                                                                                                                                                                                                                                                                                                                                                                                                                                                                                                                                                                                                                                                                                     |
| GO:0055029 | nuclear DNA-directed RNA polymerase complex | 13 of 3038 in the list | 18 of 5465 in the genome  | 1 | CCG000158.1,CCG006484.1,CCG021083.1,CCG027950.1,CCG023775.1,CCG017046.2,CCG001292.1,CCG011083.1,CCG020460.1,CCG009805.2,CCG010175.1,CCG018184.1,CCG023184.1                                                                                                                                                                                                                                                                                                                                                                                                                                                                                                                                                                                                                                                                                                                                                                                     |

|            |                                      |                        |                          |   |                                                                                                                                                                                                                                                                                                                                                                                                 |
|------------|--------------------------------------|------------------------|--------------------------|---|-------------------------------------------------------------------------------------------------------------------------------------------------------------------------------------------------------------------------------------------------------------------------------------------------------------------------------------------------------------------------------------------------|
| GO:0000922 | spindle pole                         | 9 of 3038 in the list  | 12 of 5465 in the genome | 1 | CCG027167.1,CCG015570.1,CCG026688.1,CCG021448.1,CCG019140.1,CCG019092.1,CCG024421.3,CCG000535.1,CCG022536.3                                                                                                                                                                                                                                                                                     |
| GO:0005815 | microtubule organizing center        | 9 of 3038 in the list  | 12 of 5465 in the genome | 1 | CCG027167.1,CCG015570.1,CCG026688.1,CCG021448.1,CCG019140.1,CCG019092.1,CCG024421.3,CCG000535.1,CCG022536.3                                                                                                                                                                                                                                                                                     |
| GO:0005819 | spindle                              | 9 of 3038 in the list  | 12 of 5465 in the genome | 1 | CCG027167.1,CCG015570.1,CCG026688.1,CCG021448.1,CCG019140.1,CCG019092.1,CCG024421.3,CCG000535.1,CCG022536.3                                                                                                                                                                                                                                                                                     |
| GO:0044445 | cytosolic part                       | 9 of 3038 in the list  | 12 of 5465 in the genome | 1 | CCG000789.1,CCG003215.3,CCG012959.1,CCG022214.1,CCG022453.1,CCG027316.1,CCG025277.1,CCG011658.1,CCG019558.1                                                                                                                                                                                                                                                                                     |
| GO:0031966 | mitochondrial membrane               | 32 of 3038 in the list | 50 of 5465 in the genome | 1 | CCG011932.1,CCG000102.1,CCG020245.1,CCG019590.1,CCG000205.1,CCG011381.1,CCG022802.1,CCG010112.1,CCG024119.1,CCG023814.2,CCG017614.1,CCG026240.1,CCG013013.1,CCG016304.1,CCG006459.1,CCG013643.1,CCG005677.1,CCG004155.2,CCG007862.1,CCG015410.1,CCG025107.1,CCG018684.1,CCG009142.1,CCG001279.1,CCG002790.1,CCG000148.1,CCG005924.2,CCG010939.1,CCG014053.1,CCG017125.1,CCG026514.1,CCG025163.3 |
| GO:0031461 | cullin-RING ubiquitin ligase complex | 12 of 3038 in the list | 17 of 5465 in the genome | 1 | CCG004331.1,CCG027068.1,CCG001101.1,CCG007403.1,CCG019394.1,CCG028046.1,CCG002269.1,CCG019571.1,CCG019599.1,CCG008808.1,CCG004134.1,CCG018116.1                                                                                                                                                                                                                                                 |
| GO:0016459 | myosin complex                       | 15 of 3038 in the list | 22 of 5465 in the genome | 1 | CCG004459.2,CCG021911.1,CCG000603.1,CCG012081.1,CCG004084.1,CCG026558.1,CCG024769.1,CCG015426.1,CCG002831.1,CCG011764.1,CCG004786.1,CCG024834.3,CCG010459.3,CCG016660.1,CCG023696.1                                                                                                                                                                                                             |
| GO:0005581 | collagen                             | 3 of 3038 in the list  | 3 of 5465 in the genome  | 1 | CCG020089.1,CCG004326.1,CCG004982.1                                                                                                                                                                                                                                                                                                                                                             |
| GO:0008537 | proteasome activator                 | 3 of 3038 in the list  | 3 of 5465 in the genome  | 1 | CCG026177.1,CCG010543.1,CCG027736.1                                                                                                                                                                                                                                                                                                                                                             |
| GO:0022624 | proteasome accessory                 | 3 of 3038 in the list  | 3 of 5465 in the genome  | 1 | CCG026177.1,CCG010543.1,CCG027736.1                                                                                                                                                                                                                                                                                                                                                             |
| GO:0043189 | H4/H2A histone                       | 3 of 3038 in the list  | 3 of 5465 in the genome  | 1 | CCG025747.1,CCG019745.1,CCG014195.1                                                                                                                                                                                                                                                                                                                                                             |
| GO:1902562 | H4 histone                           | 3 of 3038 in the list  | 3 of 5465 in the genome  | 1 | CCG025747.1,CCG019745.1,CCG014195.1                                                                                                                                                                                                                                                                                                                                                             |
| GO:0005681 | spliceosomal complex                 | 8 of 3038 in the list  | 11 of 5465 in the genome | 1 | CCG000754.1,CCG028285.1,CCG004008.1,CCG023686.1,CCG024810.1,CCG004927.1,CCG013802.1,CCG008858.1                                                                                                                                                                                                                                                                                                 |

|            |                                            |                        |                          |   |                                                                                                                                                                                                                                                                                                                                                                                                                                                                                                                                                 |
|------------|--------------------------------------------|------------------------|--------------------------|---|-------------------------------------------------------------------------------------------------------------------------------------------------------------------------------------------------------------------------------------------------------------------------------------------------------------------------------------------------------------------------------------------------------------------------------------------------------------------------------------------------------------------------------------------------|
| GO:0044429 | mitochondrial part                         | 44 of 3038 in the list | 72 of 5465 in the genome | 1 | CCG011932.1,CCG000102.1,CCG020245.1,CCG010159.1,CCG019590.1,CCG000205.1,CCG020949.1,CCG000728.1,CCG011381.1,CCG020879.1,CCG022802.1,CCG010112.1,CCG024119.1,CCG023814.2,CCG017614.1,CCG026240.1,CCG016304.1,CCG013013.1,CCG006459.1,CCG028505.1,CCG004605.1,CCG013643.1,CCG005677.1,CCG004155.2,CCG007246.2,CCG015410.1,CCG007862.1,CCG018684.1,CCG025107.1,CCG009142.1,CCG018128.1,CCG001279.1,CCG000148.1,CCG002790.1,CCG016399.1,CCG005924.2,CCG019712.1,CCG010939.1,CCG014053.1,CCG017125.1,CCG016431.1,CCG000089.1,CCG026514.1,CCG025163.3 |
| GO:0016592 | mediator complex                           | 20 of 3038 in the list | 31 of 5465 in the genome | 1 | CCG004762.2,CCG026219.1,CCG017156.1,CCG024666.1,CCG020695.1,CCG007647.1,CCG025828.1,CCG017524.1,CCG021633.1,CCG016772.1,CCG011094.1,CCG025856.1,CCG014682.1,CCG019814.1,CCG010318.1,CCG001096.1,CCG028326.3,CCG006134.1,CCG005168.1,CCG018315.1                                                                                                                                                                                                                                                                                                 |
| GO:0016591 | DNA-directed RNA polymerase II, holoenzyme | 11 of 3038 in the list | 16 of 5465 in the genome | 1 | CCG000158.1,CCG021083.1,CCG027950.1,CCG023775.1,CCG001292.1,CCG011083.1,CCG020460.1,CCG009805.2,CCG018184.1,CCG010175.1,CCG023184.1                                                                                                                                                                                                                                                                                                                                                                                                             |
| GO:0044798 | nuclear transcription factor complex       | 11 of 3038 in the list | 16 of 5465 in the genome | 1 | CCG000158.1,CCG025549.1,CCG027950.1,CCG001292.1,CCG011083.1,CCG022398.1,CCG020460.1,CCG018184.1,CCG010175.1,CCG009805.2,CCG023184.1                                                                                                                                                                                                                                                                                                                                                                                                             |
| GO:0005740 | mitochondrial envelope                     | 41 of 3038 in the list | 67 of 5465 in the genome | 1 | CCG011932.1,CCG000102.1,CCG020245.1,CCG010159.1,CCG019590.1,CCG000205.1,CCG020949.1,CCG011381.1,CCG020879.1,CCG022802.1,CCG010112.1,CCG024119.1,CCG023814.2,CCG017614.1,CCG026240.1,CCG016304.1,CCG013013.1,CCG006459.1,CCG004605.1,CCG013643.1,CCG005677.1,CCG004155.2,CCG007246.2,CCG015410.1,CCG007862.1,CCG018684.1,CCG025107.1,CCG009142.1,CCG018128.1,CCG001279.1,CCG002790.1,CCG000148.1,CCG005924.2,CCG019712.1,CCG010939.1,CCG014053.1,CCG017125.1,CCG016431.1,CCG000089.1,CCG026514.1,CCG025163.3                                     |

|            |                     |                        |                           |   |                                                                                                                                                                                                                                                                                                                                                                                                                                                                                                                                                                                                                                                                                                                                                                                                             |
|------------|---------------------|------------------------|---------------------------|---|-------------------------------------------------------------------------------------------------------------------------------------------------------------------------------------------------------------------------------------------------------------------------------------------------------------------------------------------------------------------------------------------------------------------------------------------------------------------------------------------------------------------------------------------------------------------------------------------------------------------------------------------------------------------------------------------------------------------------------------------------------------------------------------------------------------|
| GO:1990234 | transferase complex | 28 of 3038 in the list | 45 of 5465 in the genome  | 1 | CCG000789.1,CCG000158.1,CCG003215.3,CCG021083.1,CCG027316.1,CCG022214.1,CCG024695.1,CCG011658.1,CCG009805.2,CCG010175.1,CCG016656.1,CCG006484.1,CCG027950.1,CCG023775.1,CCG019745.1,CCG017046.2,CCG004091.1,CCG001292.1,CCG012959.1,CCG011083.1,CCG003192.1,CCG025747.1,CCG020460.1,CCG019558.1,CCG014195.1,CCG028505.1,CCG018184.1,CCG023184.1                                                                                                                                                                                                                                                                                                                                                                                                                                                             |
| GO:0031975 | envelope            | 65 of 3038 in the list | 110 of 5465 in the genome | 1 | CCG011932.1,CCG020245.1,CCG001584.1,CCG010159.1,CCG001809.1,CCG019590.1,CCG000205.1,CCG020949.1,CCG020879.1,CCG022802.1,CCG010112.1,CCG006243.1,CCG004897.1,CCG017614.1,CCG016304.1,CCG023186.1,CCG004605.1,CCG013643.1,CCG004155.2,CCG007246.2,CCG018684.1,CCG011550.1,CCG018128.1,CCG001279.1,CCG000148.1,CCG002790.1,CCG005924.2,CCG010939.1,CCG026989.1,CCG016431.1,CCG026514.1,CCG003009.1,CCG017989.1,CCG000102.1,CCG008144.1,CCG009822.1,CCG004844.1,CCG011381.1,CCG013066.1,CCG009136.1,CCG022771.1,CCG028425.2,CCG024119.1,CCG021686.1,CCG023814.2,CCG013013.1,CCG026240.1,CCG006459.1,CCG005677.1,CCG010440.1,CCG007862.1,CCG015410.1,CCG025107.1,CCG009142.1,CCG000493.1,CCG012556.1,CCG019712.1,CCG020053.1,CCG014053.1,CCG008116.1,CCG017125.1,CCG017141.1,CCG000089.1,CCG017874.1,CCG025163.3 |

|            |                                             |                        |                           |   |                                                                                                                                                                                                                                                                                                                                                                                                                                                                                                                                                                                                                                                                                                                                                                                                                                                                                                                                                                                                                                                                                                                         |
|------------|---------------------------------------------|------------------------|---------------------------|---|-------------------------------------------------------------------------------------------------------------------------------------------------------------------------------------------------------------------------------------------------------------------------------------------------------------------------------------------------------------------------------------------------------------------------------------------------------------------------------------------------------------------------------------------------------------------------------------------------------------------------------------------------------------------------------------------------------------------------------------------------------------------------------------------------------------------------------------------------------------------------------------------------------------------------------------------------------------------------------------------------------------------------------------------------------------------------------------------------------------------------|
| GO:0005694 | chromosome                                  | 90 of 3038 in the list | 154 of 5465 in the genome | 1 | CCG016201.1,CCG004973.1,CCG016237.1,CCG007336.1,CCG011675.1,CCG019284.1,CCG008560.1,CCG010136.1,CCG021491.1,CCG010647.1,CCG003310.1,CCG022918.1,CCG013617.1,CCG026473.1,CCG012476.1,CCG014537.1,CCG010137.1,CCG005194.1,CCG009461.1,CCG024623.1,CCG025880.1,CCG014836.1,CCG010904.1,CCG024177.1,CCG004481.1,CCG012514.1,CCG024588.1,CCG027196.1,CCG014772.1,CCG004012.2,CCG026474.1,CCG027183.2,CCG000166.1,CCG011184.1,CCG025893.1,CCG018249.1,CCG020652.1,CCG015167.1,CCG010905.1,CCG022456.1,CCG010909.1,CCG010648.1,CCG011615.1,CCG018583.1,CCG017580.1,CCG009980.1,CCG010906.1,CCG015968.1,CCG018893.1,CCG010138.1,CCG010649.1,CCG008892.2,CCG025877.1,CCG020987.1,CCG027199.1,CCG027198.1,CCG003438.1,CCG012083.1,CCG008559.1,CCG018287.1,CCG027696.1,CCG010907.1,CCG007767.1,CCG012229.1,CCG010650.1,CCG024624.1,CCG002942.1,CCG009275.1,CCG004494.1,CCG002947.1,CCG010908.1,CCG015312.2,CCG005716.1,CCG027197.1,CCG022673.1,CCG026159.1,CCG027697.1,CCG020442.1,CCG010646.1,CCG028222.1,CCG017598.1,CCG001810.1,CCG024787.1,CCG027695.1,CCG008972.1,CCG001913.1,CCG012584.1,CCG016576.1,CCG008302.1,CCG024788.1 |
| GO:0000123 | histone                                     | 4 of 3038 in the list  | 5 of 5465 in the genome   | 1 | CCG016656.1,CCG025747.1,CCG019745.1,CCG014195.1                                                                                                                                                                                                                                                                                                                                                                                                                                                                                                                                                                                                                                                                                                                                                                                                                                                                                                                                                                                                                                                                         |
| GO:0005779 | integral component of peroxisomal membrane  | 4 of 3038 in the list  | 5 of 5465 in the genome   | 1 | CCG019797.1,CCG006223.1,CCG019217.1,CCG010178.1                                                                                                                                                                                                                                                                                                                                                                                                                                                                                                                                                                                                                                                                                                                                                                                                                                                                                                                                                                                                                                                                         |
| GO:0005834 | heterotrimeric G-                           | 4 of 3038 in the list  | 5 of 5465 in the genome   | 1 | CCG009446.1,CCG006412.1,CCG012573.1,CCG024952.1                                                                                                                                                                                                                                                                                                                                                                                                                                                                                                                                                                                                                                                                                                                                                                                                                                                                                                                                                                                                                                                                         |
| GO:0019897 | extrinsic component of                      | 4 of 3038 in the list  | 5 of 5465 in the genome   | 1 | CCG009446.1,CCG006412.1,CCG012573.1,CCG024952.1                                                                                                                                                                                                                                                                                                                                                                                                                                                                                                                                                                                                                                                                                                                                                                                                                                                                                                                                                                                                                                                                         |
| GO:0031231 | intrinsic component of peroxisomal membrane | 4 of 3038 in the list  | 5 of 5465 in the genome   | 1 | CCG019797.1,CCG006223.1,CCG019217.1,CCG010178.1                                                                                                                                                                                                                                                                                                                                                                                                                                                                                                                                                                                                                                                                                                                                                                                                                                                                                                                                                                                                                                                                         |
| GO:0031234 | extrinsic component of cytoplasmic side of  | 4 of 3038 in the list  | 5 of 5465 in the genome   | 1 | CCG009446.1,CCG006412.1,CCG012573.1,CCG024952.1                                                                                                                                                                                                                                                                                                                                                                                                                                                                                                                                                                                                                                                                                                                                                                                                                                                                                                                                                                                                                                                                         |
| GO:0031248 | protein                                     | 4 of 3038 in the list  | 5 of 5465 in the genome   | 1 | CCG016656.1,CCG025747.1,CCG019745.1,CCG014195.1                                                                                                                                                                                                                                                                                                                                                                                                                                                                                                                                                                                                                                                                                                                                                                                                                                                                                                                                                                                                                                                                         |
| GO:0031984 | organelle                                   | 4 of 3038 in the list  | 5 of 5465 in the genome   | 1 | CCG011023.1,CCG014304.1,CCG019892.1,CCG021819.1                                                                                                                                                                                                                                                                                                                                                                                                                                                                                                                                                                                                                                                                                                                                                                                                                                                                                                                                                                                                                                                                         |
| GO:0031985 | Golgi cisterna                              | 4 of 3038 in the list  | 5 of 5465 in the genome   | 1 | CCG011023.1,CCG014304.1,CCG019892.1,CCG021819.1                                                                                                                                                                                                                                                                                                                                                                                                                                                                                                                                                                                                                                                                                                                                                                                                                                                                                                                                                                                                                                                                         |

|            |                                            |                        |                          |   |                                                                                                                         |
|------------|--------------------------------------------|------------------------|--------------------------|---|-------------------------------------------------------------------------------------------------------------------------|
| GO:0032580 | Golgi cisterna                             | 4 of 3038 in the list  | 5 of 5465 in the genome  | 1 | CCG011023.1,CCG014304.1,CCG019892.1,CCG021819.1                                                                         |
| GO:1902493 | acetyltransferase                          | 4 of 3038 in the list  | 5 of 5465 in the genome  | 1 | CCG016656.1,CCG025747.1,CCG019745.1,CCG014195.1                                                                         |
| GO:0005578 | proteinaceous extracellular matrix         | 10 of 3038 in the list | 15 of 5465 in the genome | 1 | CCG003882.1,CCG020089.1,CCG004326.1,CCG026583.1,CCG015389.1,CCG008431.1,CCG004982.1,CCG025670.1,CCG013615.1,CCG006702.1 |
| GO:0045211 | postsynaptic membrane                      | 7 of 3038 in the list  | 10 of 5465 in the genome | 1 | CCG014158.1,CCG011730.1,CCG018801.1,CCG002839.1,CCG022137.1,CCG027498.1,CCG006803.1                                     |
| GO:0097060 | synaptic membrane                          | 7 of 3038 in the list  | 10 of 5465 in the genome | 1 | CCG014158.1,CCG011730.1,CCG018801.1,CCG002839.1,CCG022137.1,CCG027498.1,CCG006803.1                                     |
| GO:0000172 | ribonuclease MRP                           | 2 of 3038 in the list  | 2 of 5465 in the genome  | 1 | CCG023511.1,CCG007636.1                                                                                                 |
| GO:0000176 | nuclear exosome                            | 2 of 3038 in the list  | 2 of 5465 in the genome  | 1 | CCG000806.1,CCG001461.1                                                                                                 |
| GO:0000178 | exosome (RNase                             | 2 of 3038 in the list  | 2 of 5465 in the genome  | 1 | CCG000806.1,CCG001461.1                                                                                                 |
| GO:0000275 | mitochondrial proton-transporting ATP      | 2 of 3038 in the list  | 2 of 5465 in the genome  | 1 | CCG015410.1,CCG005924.2                                                                                                 |
| GO:0000439 | core TFIIF complex                         | 2 of 3038 in the list  | 2 of 5465 in the genome  | 1 | CCG011015.1,CCG007693.1                                                                                                 |
| GO:0000441 | SSL2-core TFIIF                            | 2 of 3038 in the list  | 2 of 5465 in the genome  | 1 | CCG011015.1,CCG007693.1                                                                                                 |
| GO:0001726 | ruffle                                     | 2 of 3038 in the list  | 2 of 5465 in the genome  | 1 | CCG014318.1,CCG003587.1                                                                                                 |
| GO:0005605 | basal lamina                               | 2 of 3038 in the list  | 2 of 5465 in the genome  | 1 | CCG015389.1,CCG008431.1                                                                                                 |
| GO:0005606 | laminin-1 complex                          | 2 of 3038 in the list  | 2 of 5465 in the genome  | 1 | CCG015389.1,CCG008431.1                                                                                                 |
| GO:0005637 | nuclear inner                              | 2 of 3038 in the list  | 2 of 5465 in the genome  | 1 | CCG028425.2,CCG017989.1                                                                                                 |
| GO:0005639 | integral component of nuclear inner        | 2 of 3038 in the list  | 2 of 5465 in the genome  | 1 | CCG028425.2,CCG017989.1                                                                                                 |
| GO:0005657 | replication fork                           | 2 of 3038 in the list  | 2 of 5465 in the genome  | 1 | CCG018583.1,CCG015312.2                                                                                                 |
| GO:0005663 | DNA replication factor                     | 2 of 3038 in the list  | 2 of 5465 in the genome  | 1 | CCG018583.1,CCG015312.2                                                                                                 |
| GO:0005665 | DNA-directed RNA polymerase II, core       | 2 of 3038 in the list  | 2 of 5465 in the genome  | 1 | CCG021083.1,CCG023775.1                                                                                                 |
| GO:0005666 | DNA-directed RNA                           | 2 of 3038 in the list  | 2 of 5465 in the genome  | 1 | CCG006484.1,CCG017046.2                                                                                                 |
| GO:0005674 | transcription factor                       | 2 of 3038 in the list  | 2 of 5465 in the genome  | 1 | CCG011083.1,CCG023184.1                                                                                                 |
| GO:0005751 | mitochondrial                              | 2 of 3038 in the list  | 2 of 5465 in the genome  | 1 | CCG011932.1,CCG007862.1                                                                                                 |
| GO:0005786 | signal recognition particle, endoplasmic   | 2 of 3038 in the list  | 2 of 5465 in the genome  | 1 | CCG018217.1,CCG020806.1                                                                                                 |
| GO:0005852 | eukaryotic translation initiation factor 3 | 2 of 3038 in the list  | 2 of 5465 in the genome  | 1 | CCG008592.1,CCG000294.1                                                                                                 |
| GO:0005891 | voltage-gated calcium                      | 2 of 3038 in the list  | 2 of 5465 in the genome  | 1 | CCG025568.1,CCG005277.1                                                                                                 |
| GO:0005945 | 6-phosphofructokinase                      | 2 of 3038 in the list  | 2 of 5465 in the genome  | 1 | CCG022214.1,CCG003215.3                                                                                                 |



|            |                                            |                       |                         |   |                                                             |
|------------|--------------------------------------------|-----------------------|-------------------------|---|-------------------------------------------------------------|
| GO:0009331 | glycerol-3-phosphate dehydrogenase         | 2 of 3038 in the list | 2 of 5465 in the genome | 1 | CCG009685.1,CCG014228.2                                     |
| GO:0016010 | dystrophin-associated glycoprotein complex | 2 of 3038 in the list | 2 of 5465 in the genome | 1 | CCG027899.1,CCG022540.1                                     |
| GO:0016011 | dystroglycan complex                       | 2 of 3038 in the list | 2 of 5465 in the genome | 1 | CCG027899.1,CCG022540.1                                     |
| GO:0016012 | sarcoglycan complex                        | 2 of 3038 in the list | 2 of 5465 in the genome | 1 | CCG027899.1,CCG022540.1                                     |
| GO:0016602 | CCAAT-binding factor                       | 2 of 3038 in the list | 2 of 5465 in the genome | 1 | CCG022398.1,CCG025549.1                                     |
| GO:0030677 | ribonuclease P                             | 2 of 3038 in the list | 2 of 5465 in the genome | 1 | CCG023511.1,CCG007636.1                                     |
| GO:0030688 | preribosome, small                         | 2 of 3038 in the list | 2 of 5465 in the genome | 1 | CCG023263.1,CCG018474.1                                     |
| GO:0031229 | intrinsic component of nuclear inner       | 2 of 3038 in the list | 2 of 5465 in the genome | 1 | CCG028425.2,CCG017989.1                                     |
| GO:0031252 | cell leading edge                          | 2 of 3038 in the list | 2 of 5465 in the genome | 1 | CCG014318.1,CCG003587.1                                     |
| GO:0031429 | box H/ACA snoRNP                           | 2 of 3038 in the list | 2 of 5465 in the genome | 1 | CCG002792.1,CCG028653.1                                     |
| GO:0031965 | nuclear membrane                           | 2 of 3038 in the list | 2 of 5465 in the genome | 1 | CCG028425.2,CCG017989.1                                     |
| GO:0032777 | Piccolo NuA4 histone acetyltransferase     | 2 of 3038 in the list | 2 of 5465 in the genome | 1 | CCG019745.1,CCG014195.1                                     |
| GO:0032806 | carboxy-terminal domain protein kinase     | 2 of 3038 in the list | 2 of 5465 in the genome | 1 | CCG011015.1,CCG007693.1                                     |
| GO:0034704 | calcium channel                            | 2 of 3038 in the list | 2 of 5465 in the genome | 1 | CCG025568.1,CCG005277.1                                     |
| GO:0035267 | NuA4 histone                               | 2 of 3038 in the list | 2 of 5465 in the genome | 1 | CCG019745.1,CCG014195.1                                     |
| GO:0042995 | cell projection                            | 2 of 3038 in the list | 2 of 5465 in the genome | 1 | CCG014318.1,CCG003587.1                                     |
| GO:0043256 | laminin complex                            | 2 of 3038 in the list | 2 of 5465 in the genome | 1 | CCG015389.1,CCG008431.1                                     |
| GO:0043626 | PCNA complex                               | 2 of 3038 in the list | 2 of 5465 in the genome | 1 | CCG026259.1,CCG011911.1                                     |
| GO:0044452 | nucleolar part                             | 2 of 3038 in the list | 2 of 5465 in the genome | 1 | CCG002792.1,CCG028653.1                                     |
| GO:0044453 | nuclear membrane part                      | 2 of 3038 in the list | 2 of 5465 in the genome | 1 | CCG028425.2,CCG017989.1                                     |
| GO:0044796 | DNA polymerase processivity factor         | 2 of 3038 in the list | 2 of 5465 in the genome | 1 | CCG026259.1,CCG011911.1                                     |
| GO:0045277 | respiratory chain                          | 2 of 3038 in the list | 2 of 5465 in the genome | 1 | CCG011932.1,CCG007862.1                                     |
| GO:0072588 | box H/ACA RNP                              | 2 of 3038 in the list | 2 of 5465 in the genome | 1 | CCG002792.1,CCG028653.1                                     |
| GO:0000228 | nuclear chromosome                         | 5 of 3038 in the list | 7 of 5465 in the genome | 1 | CCG011675.1,CCG001913.1,CCG024588.1,CCG016237.1,CCG028222.1 |
| GO:0005746 | mitochondrial respiratory chain            | 5 of 3038 in the list | 7 of 5465 in the genome | 1 | CCG017614.1,CCG011932.1,CCG016304.1,CCG007862.1,CCG011381.1 |
| GO:0005759 | mitochondrial matrix                       | 5 of 3038 in the list | 7 of 5465 in the genome | 1 | CCG025107.1,CCG010112.1,CCG016399.1,CCG028505.1,CCG000728.1 |

|            |                                       |                        |                           |   |                                                                                                                                                                                                                                                                                                                                                                                                                                                                                                                                                                                                                                                                                                                                                 |
|------------|---------------------------------------|------------------------|---------------------------|---|-------------------------------------------------------------------------------------------------------------------------------------------------------------------------------------------------------------------------------------------------------------------------------------------------------------------------------------------------------------------------------------------------------------------------------------------------------------------------------------------------------------------------------------------------------------------------------------------------------------------------------------------------------------------------------------------------------------------------------------------------|
| GO:0005942 | phosphatidylinositol 3-kinase complex | 5 of 3038 in the list  | 7 of 5465 in the genome   | 1 | CCG000789.1,CCG027316.1,CCG019558.1,CCG011658.1,CCG012959.1                                                                                                                                                                                                                                                                                                                                                                                                                                                                                                                                                                                                                                                                                     |
| GO:0044420 | extracellular matrix part             | 5 of 3038 in the list  | 7 of 5465 in the genome   | 1 | CCG020089.1,CCG004326.1,CCG015389.1,CCG008431.1,CCG004982.1                                                                                                                                                                                                                                                                                                                                                                                                                                                                                                                                                                                                                                                                                     |
| GO:0070469 | respiratory chain                     | 5 of 3038 in the list  | 7 of 5465 in the genome   | 1 | CCG017614.1,CCG011932.1,CCG016304.1,CCG007862.1,CCG011381.1                                                                                                                                                                                                                                                                                                                                                                                                                                                                                                                                                                                                                                                                                     |
| GO:0005829 | cytosol                               | 9 of 3038 in the list  | 14 of 5465 in the genome  | 1 | CCG000789.1,CCG003215.3,CCG012959.1,CCG022214.1,CCG022453.1,CCG027316.1,CCG025277.1,CCG011658.1,CCG019558.1                                                                                                                                                                                                                                                                                                                                                                                                                                                                                                                                                                                                                                     |
| GO:0005739 | mitochondrion                         | 60 of 3038 in the list | 104 of 5465 in the genome | 1 | CCG011932.1,CCG013032.1,CCG000102.1,CCG020245.1,CCG028409.1,CCG010159.1,CCG019590.1,CCG002890.1,CCG000205.1,CCG020949.1,CCG008871.1,CCG000728.1,CCG011381.1,CCG027472.1,CCG020879.1,CCG022802.1,CCG010112.1,CCG024119.1,CCG022464.1,CCG023814.2,CCG017614.1,CCG026240.1,CCG016304.1,CCG013013.1,CCG006459.1,CCG028505.1,CCG004605.1,CCG012569.1,CCG013643.1,CCG006077.1,CCG004155.2,CCG005677.1,CCG007246.2,CCG015410.1,CCG007862.1,CCG018684.1,CCG025107.1,CCG009142.1,CCG002823.1,CCG018128.1,CCG011510.1,CCG000890.1,CCG001279.1,CCG000148.1,CCG002790.1,CCG019867.2,CCG016399.1,CCG005924.2,CCG019712.1,CCG010939.1,CCG004901.1,CCG016699.1,CCG014171.1,CCG020281.1,CCG014053.1,CCG017125.1,CCG016431.1,CCG000089.1,CCG026514.1,CCG025163.3 |
| GO:0030054 | cell junction                         | 6 of 3038 in the list  | 9 of 5465 in the genome   | 1 | CCG014318.1,CCG002453.1,CCG016125.1,CCG028356.1,CCG003587.1,CCG002276.1                                                                                                                                                                                                                                                                                                                                                                                                                                                                                                                                                                                                                                                                         |
| GO:0000323 | lytic vacuole                         | 3 of 3038 in the list  | 4 of 5465 in the genome   | 1 | CCG017994.1,CCG019082.1,CCG013509.1                                                                                                                                                                                                                                                                                                                                                                                                                                                                                                                                                                                                                                                                                                             |
| GO:0005744 | mitochondrial inner membrane          | 3 of 3038 in the list  | 4 of 5465 in the genome   | 1 | CCG019590.1,CCG017125.1,CCG010939.1                                                                                                                                                                                                                                                                                                                                                                                                                                                                                                                                                                                                                                                                                                             |
| GO:0005764 | lysosome                              | 3 of 3038 in the list  | 4 of 5465 in the genome   | 1 | CCG017994.1,CCG019082.1,CCG013509.1                                                                                                                                                                                                                                                                                                                                                                                                                                                                                                                                                                                                                                                                                                             |

|            |                                              |                         |                           |   |                                                                                                                                                                                                                                                                                                                                                                                                                                                                                                                                                                                                                                                                                                                                                                                                                                                                                                                                                                                                                                                                                                                                                                                                                                                                                                                                                                                                                                                                                                                                                                                 |
|------------|----------------------------------------------|-------------------------|---------------------------|---|---------------------------------------------------------------------------------------------------------------------------------------------------------------------------------------------------------------------------------------------------------------------------------------------------------------------------------------------------------------------------------------------------------------------------------------------------------------------------------------------------------------------------------------------------------------------------------------------------------------------------------------------------------------------------------------------------------------------------------------------------------------------------------------------------------------------------------------------------------------------------------------------------------------------------------------------------------------------------------------------------------------------------------------------------------------------------------------------------------------------------------------------------------------------------------------------------------------------------------------------------------------------------------------------------------------------------------------------------------------------------------------------------------------------------------------------------------------------------------------------------------------------------------------------------------------------------------|
| GO:0043234 | protein complex                              | 347 of 3038 in the list | 620 of 5465 in the genome | 1 | CCG011932.1,CCG027068.1,CCG026177.1,CCG001809.1,CCG024695.1,CCG000585.1,CCG010647.1,CCG005370.1,CCG026882.1,CCG026473.1,CCG001167.1,CCG004091.1,CCG001292.1,CCG028326.3,CCG028505.1,CCG006134.1,CCG005194.1,CCG014836.1,CCG024177.1,CCG012573.1,CCG008431.1,CCG012514.1,CCG003362.1,CCG027196.1,CCG016370.1,CCG026413.3,CCG012536.1,CCG027796.1,CCG018533.1,CCG025450.1,CCG000526.1,CCG021911.1,CCG010905.1,CCG028046.1,CCG011862.1,CCG027899.1,CCG011764.1,CCG010909.1,CCG008808.1,CCG014195.1,CCG011911.1,CCG026212.1,CCG017580.1,CCG024952.1,CCG009980.1,CCG016493.2,CCG009822.1,CCG004279.1,CCG010649.1,CCG004212.1,CCG019571.1,CCG012534.1,CCG007647.1,CCG016189.1,CCG004331.1,CCG025396.1,CCG006484.1,CCG021633.1,CCG019029.1,CCG008559.1,CCG001461.1,CCG027696.1,CCG005480.2,CCG024432.2,CCG019678.1,CCG009543.1,CCG004494.1,CCG001698.1,CCG003104.1,CCG021228.1,CCG022214.1,CCG006412.1,CCG022673.1,CCG019647.1,CCG026159.1,CCG016307.1,CCG009805.2,CCG012556.1,CCG002852.1,CCG020634.1,CCG019250.1,CCG008557.1,CCG012584.1,CCG018688.1,CCG014228.2,CCG021895.1,CCG017141.1,CCG025747.1,CCG002937.1,CCG024788.1,CCG000294.1,CCG005168.1,CCG018184.1,CCG018315.1,CCG001285.1,CCG003060.1,CCG000789.1,CCG007336.1,CCG003707.1,CCG027692.1,CCG010136.1,CCG003310.1,CCG019599.1,CCG008422.1,CCG004459.2,CCG013617.1,CCG010112.1,CCG004084.1,CCG010137.1,CCG015568.1,CCG022398.1,CCG024232.1,CCG007485.1,CCG027736.1,CCG006421.1,CCG009461.1,CCG023963.3,CCG023184.1,CCG014772.1,CCG015426.1,CCG027316.1,CCG000148.1,CCG000535.1,CCG027257.1,CCG022540.1,CCG025549.1,CCG0110 |
| GO:0005911 | cell-cell junction                           | 4 of 3038 in the list   | 6 of 5465 in the genome   | 1 | CCG002453.1,CCG016125.1,CCG028356.1,CCG002276.1                                                                                                                                                                                                                                                                                                                                                                                                                                                                                                                                                                                                                                                                                                                                                                                                                                                                                                                                                                                                                                                                                                                                                                                                                                                                                                                                                                                                                                                                                                                                 |
| GO:0005921 | gap junction                                 | 4 of 3038 in the list   | 6 of 5465 in the genome   | 1 | CCG002453.1,CCG016125.1,CCG028356.1,CCG002276.1                                                                                                                                                                                                                                                                                                                                                                                                                                                                                                                                                                                                                                                                                                                                                                                                                                                                                                                                                                                                                                                                                                                                                                                                                                                                                                                                                                                                                                                                                                                                 |
| GO:0019013 | viral nucleocapsid                           | 4 of 3038 in the list   | 6 of 5465 in the genome   | 1 | CCG025780.1,CCG000477.1,CCG000478.1,CCG025779.1                                                                                                                                                                                                                                                                                                                                                                                                                                                                                                                                                                                                                                                                                                                                                                                                                                                                                                                                                                                                                                                                                                                                                                                                                                                                                                                                                                                                                                                                                                                                 |
| GO:0008287 | protein serine/threonine phosphatase complex | 9 of 3038 in the list   | 15 of 5465 in the genome  | 1 | CCG006884.1,CCG003362.1,CCG028615.1,CCG018688.1,CCG004212.1,CCG007485.1,CCG011382.1,CCG027539.1,CCG026212.1                                                                                                                                                                                                                                                                                                                                                                                                                                                                                                                                                                                                                                                                                                                                                                                                                                                                                                                                                                                                                                                                                                                                                                                                                                                                                                                                                                                                                                                                     |

|            |                                |                        |                           |   |                                                                                                                                                                                                                                                                                                                                                                                                                                                                                                                                                                                                                                                                                                                                                                                                                                                                                                             |
|------------|--------------------------------|------------------------|---------------------------|---|-------------------------------------------------------------------------------------------------------------------------------------------------------------------------------------------------------------------------------------------------------------------------------------------------------------------------------------------------------------------------------------------------------------------------------------------------------------------------------------------------------------------------------------------------------------------------------------------------------------------------------------------------------------------------------------------------------------------------------------------------------------------------------------------------------------------------------------------------------------------------------------------------------------|
| GO:0044427 | chromosomal part               | 73 of 3038 in the list | 130 of 5465 in the genome | 1 | CCG016237.1,CCG007336.1,CCG019284.1,CCG008560.1,CCG010136.1,CCG021491.1,CCG010647.1,CCG003310.1,CCG013617.1,CCG026473.1,CCG012476.1,CCG014537.1,CCG010137.1,CCG005194.1,CCG009461.1,CCG024623.1,CCG025880.1,CCG014836.1,CCG010904.1,CCG024177.1,CCG004481.1,CCG012514.1,CCG027196.1,CCG014772.1,CCG004012.2,CCG026474.1,CCG025893.1,CCG018249.1,CCG020652.1,CCG010905.1,CCG010909.1,CCG010648.1,CCG018583.1,CCG017580.1,CCG009980.1,CCG010906.1,CCG015968.1,CCG018893.1,CCG010138.1,CCG010649.1,CCG008892.2,CCG025877.1,CCG027199.1,CCG027198.1,CCG018287.1,CCG008559.1,CCG027696.1,CCG010907.1,CCG007767.1,CCG012229.1,CCG010650.1,CCG024624.1,CCG009275.1,CCG002942.1,CCG004494.1,CCG002947.1,CCG010908.1,CCG015312.2,CCG005716.1,CCG027197.1,CCG022673.1,CCG026159.1,CCG027697.1,CCG020442.1,CCG010646.1,CCG017598.1,CCG028222.1,CCG024787.1,CCG027695.1,CCG012584.1,CCG016576.1,CCG008302.1,CCG024788.1 |
| GO:0015934 | large ribosomal subunit        | 10 of 3038 in the list | 17 of 5465 in the genome  | 1 | CCG014051.1,CCG024813.1,CCG026048.1,CCG001863.1,CCG027913.1,CCG018126.1,CCG002238.1,CCG025223.1,CCG002966.1,CCG021737.1                                                                                                                                                                                                                                                                                                                                                                                                                                                                                                                                                                                                                                                                                                                                                                                     |
| GO:0005875 | microtubule associated complex | 15 of 3038 in the list | 26 of 5465 in the genome  | 1 | CCG016119.1,CCG021317.1,CCG001167.1,CCG008377.1,CCG023488.2,CCG021895.1,CCG012733.1,CCG025520.1,CCG003104.1,CCG005525.1,CCG021228.1,CCG003707.1,CCG019329.1,CCG008346.1,CCG018918.1                                                                                                                                                                                                                                                                                                                                                                                                                                                                                                                                                                                                                                                                                                                         |
| GO:0000139 | Golgi membrane                 | 17 of 3038 in the list | 30 of 5465 in the genome  | 1 | CCG014304.1,CCG019892.1,CCG021819.1,CCG009082.1,CCG026620.1,CCG017197.1,CCG011023.1,CCG000210.1,CCG025309.1,CCG012350.1,CCG016003.1,CCG007989.1,CCG027362.1,CCG011813.1,CCG019210.1,CCG020315.1,CCG016673.1                                                                                                                                                                                                                                                                                                                                                                                                                                                                                                                                                                                                                                                                                                 |

|            |                                           |                        |                           |   |                                                                                                                                                                                                                                                                                                                                                                                                                                                                                                                                                                                                                                                                                                                                                                                     |
|------------|-------------------------------------------|------------------------|---------------------------|---|-------------------------------------------------------------------------------------------------------------------------------------------------------------------------------------------------------------------------------------------------------------------------------------------------------------------------------------------------------------------------------------------------------------------------------------------------------------------------------------------------------------------------------------------------------------------------------------------------------------------------------------------------------------------------------------------------------------------------------------------------------------------------------------|
| GO:0000151 | ubiquitin ligase complex                  | 17 of 3038 in the list | 30 of 5465 in the genome  | 1 | CCG003060.1,CCG027068.1,CCG001101.1,CCG019394.1,CCG019571.1,CCG020230.3,CCG019599.1,CCG018116.1,CCG004331.1,CCG016189.1,CCG008557.1,CCG007403.1,CCG028046.1,CCG006505.1,CCG002269.1,CCG008808.1,CCG004134.1                                                                                                                                                                                                                                                                                                                                                                                                                                                                                                                                                                         |
| GO:0012505 | endomembrane system                       | 63 of 3038 in the list | 114 of 5465 in the genome | 1 | CCG022047.1,CCG019892.1,CCG021819.1,CCG018536.1,CCG009082.1,CCG008144.1,CCG009822.1,CCG001809.1,CCG026620.1,CCG000663.1,CCG011023.1,CCG019367.2,CCG013131.1,CCG026370.1,CCG000210.1,CCG015800.2,CCG025309.1,CCG016003.1,CCG004806.1,CCG026146.1,CCG013066.1,CCG009136.1,CCG022771.1,CCG007330.1,CCG004091.1,CCG028425.2,CCG027362.1,CCG006243.1,CCG011813.1,CCG004897.1,CCG020315.1,CCG015087.1,CCG015843.1,CCG000010.1,CCG023186.1,CCG025233.1,CCG014304.1,CCG010440.1,CCG022209.1,CCG017241.1,CCG011550.1,CCG009434.1,CCG017197.1,CCG000493.1,CCG012350.1,CCG000552.1,CCG012556.1,CCG024760.1,CCG020053.1,CCG028332.1,CCG007989.1,CCG003110.1,CCG019210.1,CCG026989.1,CCG008116.1,CCG003192.1,CCG017141.1,CCG017874.1,CCG003009.1,CCG002930.1,CCG003251.1,CCG017989.1,CCG016673.1 |
| GO:0000015 | phosphopyruvate                           | 2 of 3038 in the list  | 3 of 5465 in the genome   | 1 | CCG022453.1,CCG025277.1                                                                                                                                                                                                                                                                                                                                                                                                                                                                                                                                                                                                                                                                                                                                                             |
| GO:0005664 | nuclear origin of replication recognition | 2 of 3038 in the list  | 3 of 5465 in the genome   | 1 | CCG016237.1,CCG028222.1                                                                                                                                                                                                                                                                                                                                                                                                                                                                                                                                                                                                                                                                                                                                                             |
| GO:0005912 | adherens junction                         | 2 of 3038 in the list  | 3 of 5465 in the genome   | 1 | CCG014318.1,CCG003587.1                                                                                                                                                                                                                                                                                                                                                                                                                                                                                                                                                                                                                                                                                                                                                             |
| GO:0005924 | cell-substrate adherens                   | 2 of 3038 in the list  | 3 of 5465 in the genome   | 1 | CCG014318.1,CCG003587.1                                                                                                                                                                                                                                                                                                                                                                                                                                                                                                                                                                                                                                                                                                                                                             |
| GO:0005925 | focal adhesion                            | 2 of 3038 in the list  | 3 of 5465 in the genome   | 1 | CCG014318.1,CCG003587.1                                                                                                                                                                                                                                                                                                                                                                                                                                                                                                                                                                                                                                                                                                                                                             |
| GO:0030055 | cell-substrate junction                   | 2 of 3038 in the list  | 3 of 5465 in the genome   | 1 | CCG014318.1,CCG003587.1                                                                                                                                                                                                                                                                                                                                                                                                                                                                                                                                                                                                                                                                                                                                                             |
| GO:0033588 | Elongator holoenzyme                      | 2 of 3038 in the list  | 3 of 5465 in the genome   | 1 | CCG018515.1,CCG023065.1                                                                                                                                                                                                                                                                                                                                                                                                                                                                                                                                                                                                                                                                                                                                                             |
| GO:0042765 | GPI-anchor                                | 2 of 3038 in the list  | 3 of 5465 in the genome   | 1 | CCG022047.1,CCG026146.1                                                                                                                                                                                                                                                                                                                                                                                                                                                                                                                                                                                                                                                                                                                                                             |
| GO:0044454 | nuclear chromosome                        | 2 of 3038 in the list  | 3 of 5465 in the genome   | 1 | CCG016237.1,CCG028222.1                                                                                                                                                                                                                                                                                                                                                                                                                                                                                                                                                                                                                                                                                                                                                             |
| GO:0070161 | anchoring junction                        | 2 of 3038 in the list  | 3 of 5465 in the genome   | 1 | CCG014318.1,CCG003587.1                                                                                                                                                                                                                                                                                                                                                                                                                                                                                                                                                                                                                                                                                                                                                             |
| GO:0044456 | synapse part                              | 10 of 3038 in the list | 18 of 5465 in the genome  | 1 | CCG022137.1,CCG027412.1,CCG008323.1,CCG006803.1,CCG005191.1,CCG011730.1,CCG014158.1,CCG018801.1,CCG002839.1,CCG027498.1                                                                                                                                                                                                                                                                                                                                                                                                                                                                                                                                                                                                                                                             |

|            |                                          |                        |                          |   |                                                                                                                                     |
|------------|------------------------------------------|------------------------|--------------------------|---|-------------------------------------------------------------------------------------------------------------------------------------|
| GO:0045202 | synapse                                  | 10 of 3038 in the list | 18 of 5465 in the genome | 1 | CCG022137.1,CCG027412.1,CCG008323.1,CCG006803.1,CCG005191.1,CCG011730.1,CCG014158.1,CCG018801.1,CCG002839.1,CCG027498.1             |
| GO:0000313 | organellar ribosome                      | 3 of 3038 in the list  | 5 of 5465 in the genome  | 1 | CCG025107.1,CCG010112.1,CCG016399.1                                                                                                 |
| GO:0005669 | transcription factor                     | 3 of 3038 in the list  | 5 of 5465 in the genome  | 1 | CCG027950.1,CCG009805.2,CCG010175.1                                                                                                 |
| GO:0005761 | mitochondrial ribosome                   | 3 of 3038 in the list  | 5 of 5465 in the genome  | 1 | CCG025107.1,CCG010112.1,CCG016399.1                                                                                                 |
| GO:0005801 | cis-Golgi network                        | 3 of 3038 in the list  | 5 of 5465 in the genome  | 1 | CCG009428.1,CCG007989.1,CCG009362.1                                                                                                 |
| GO:0031301 | integral component of organelle membrane | 11 of 3038 in the list | 20 of 5465 in the genome | 1 | CCG022047.1,CCG006223.1,CCG028425.2,CCG019210.1,CCG019367.2,CCG019797.1,CCG019217.1,CCG010178.1,CCG026514.1,CCG026146.1,CCG017989.1 |
| GO:0005778 | peroxisomal membrane                     | 5 of 3038 in the list  | 9 of 5465 in the genome  | 1 | CCG018832.1,CCG019797.1,CCG006223.1,CCG019217.1,CCG010178.1                                                                         |
| GO:0031903 | microbody membrane                       | 5 of 3038 in the list  | 9 of 5465 in the genome  | 1 | CCG018832.1,CCG019797.1,CCG006223.1,CCG019217.1,CCG010178.1                                                                         |
| GO:0044438 | microbody part                           | 5 of 3038 in the list  | 9 of 5465 in the genome  | 1 | CCG018832.1,CCG019797.1,CCG006223.1,CCG019217.1,CCG010178.1                                                                         |
| GO:0044439 | peroxisomal part                         | 5 of 3038 in the list  | 9 of 5465 in the genome  | 1 | CCG018832.1,CCG019797.1,CCG006223.1,CCG019217.1,CCG010178.1                                                                         |
| GO:0005773 | vacuole                                  | 6 of 3038 in the list  | 11 of 5465 in the genome | 1 | CCG010696.1,CCG000585.1,CCG017994.1,CCG012534.1,CCG019082.1,CCG013509.1                                                             |
| GO:0005795 | Golgi stack                              | 6 of 3038 in the list  | 11 of 5465 in the genome | 1 | CCG011023.1,CCG014304.1,CCG003880.1,CCG019892.1,CCG021819.1,CCG021053.1                                                             |

|            |                   |                        |                           |   |                                                                                                                                                                                                                                                                                                                                                                                                                                                                                                                                                                                                                                                                                                                                                                                                                                                                                                                                                                                                                                                                                     |
|------------|-------------------|------------------------|---------------------------|---|-------------------------------------------------------------------------------------------------------------------------------------------------------------------------------------------------------------------------------------------------------------------------------------------------------------------------------------------------------------------------------------------------------------------------------------------------------------------------------------------------------------------------------------------------------------------------------------------------------------------------------------------------------------------------------------------------------------------------------------------------------------------------------------------------------------------------------------------------------------------------------------------------------------------------------------------------------------------------------------------------------------------------------------------------------------------------------------|
| GO:0005856 | cytoskeleton      | 87 of 3038 in the list | 160 of 5465 in the genome | 1 | CCG015570.1,CCG006420.1,CCG028253.1,CCG013000.1,CCG026823.1,CCG023488.2,CCG003707.1,CCG024718.1,CCG004786.1,CCG019356.1,CCG005370.1,CCG009243.1,CCG019028.1,CCG004459.2,CCG001167.1,CCG004084.1,CCG002696.1,CCG003587.1,CCG006479.1,CCG025520.1,CCG002831.1,CCG027236.1,CCG006421.1,CCG023963.3,CCG007985.1,CCG012081.1,CCG013673.1,CCG002099.1,CCG015426.1,CCG016370.1,CCG014318.1,CCG000535.1,CCG022536.3,CCG010459.3,CCG021911.1,CCG007532.1,CCG008377.1,CCG028503.1,CCG007531.1,CCG018820.3,CCG010538.1,CCG024421.3,CCG011764.1,CCG008346.1,CCG026688.1,CCG021496.1,CCG015784.1,CCG013637.1,CCG023682.1,CCG024769.1,CCG012733.1,CCG019140.1,CCG010418.1,CCG020010.1,CCG024834.3,CCG009080.1,CCG015908.2,CCG027167.1,CCG025396.1,CCG000603.1,CCG019029.1,CCG004101.1,CCG021448.1,CCG008748.1,CCG009543.1,CCG016119.1,CCG015289.1,CCG028230.1,CCG018960.1,CCG003104.1,CCG005525.1,CCG021228.1,CCG019329.1,CCG005886.1,CCG023696.1,CCG002852.1,CCG010864.1,CCG009528.1,CCG021317.1,CCG026558.1,CCG021895.1,CCG002137.1,CCG019092.1,CCG008834.1,CCG016660.1,CCG028236.1,CCG018918.1 |
| GO:0044391 | ribosomal subunit | 17 of 3038 in the list | 32 of 5465 in the genome  | 1 | CCG014051.1,CCG008569.1,CCG001863.1,CCG016399.1,CCG018126.1,CCG009394.1,CCG005442.1,CCG002966.1,CCG026048.1,CCG024813.1,CCG027913.1,CCG002408.1,CCG020963.1,CCG027748.1,CCG002238.1,CCG025223.1,CCG021737.1                                                                                                                                                                                                                                                                                                                                                                                                                                                                                                                                                                                                                                                                                                                                                                                                                                                                         |
| GO:0005794 | Golgi apparatus   | 26 of 3038 in the list | 49 of 5465 in the genome  | 1 | CCG008896.1,CCG014304.1,CCG003880.1,CCG019892.1,CCG021819.1,CCG009082.1,CCG026620.1,CCG017197.1,CCG011023.1,CCG027692.1,CCG000210.1,CCG013636.1,CCG025309.1,CCG016003.1,CCG012350.1,CCG010417.2,CCG027257.1,CCG007989.1,CCG021053.1,CCG027362.1,CCG011813.1,CCG019210.1,CCG011862.1,CCG020315.1,CCG013126.2,CCG016673.1                                                                                                                                                                                                                                                                                                                                                                                                                                                                                                                                                                                                                                                                                                                                                             |

|            |                    |                        |                           |   |                                                                                                                                                                                                                                                                                                                                                                                                                                                                                                                                                                                                                                                                                                                                                                         |
|------------|--------------------|------------------------|---------------------------|---|-------------------------------------------------------------------------------------------------------------------------------------------------------------------------------------------------------------------------------------------------------------------------------------------------------------------------------------------------------------------------------------------------------------------------------------------------------------------------------------------------------------------------------------------------------------------------------------------------------------------------------------------------------------------------------------------------------------------------------------------------------------------------|
| GO:0015629 | actin cytoskeleton | 20 of 3038 in the list | 38 of 5465 in the genome  | 1 | CCG012081.1,CCG024769.1,CCG015426.1,CCG014318.1,CCG004786.1,CCG019356.1,CCG024834.3,CCG010459.3,CCG023696.1,CCG004459.2,CCG000603.1,CCG021911.1,CCG004084.1,CCG026558.1,CCG006479.1,CCG003587.1,CCG002831.1,CCG011764.1,CCG008834.1,CCG016660.1                                                                                                                                                                                                                                                                                                                                                                                                                                                                                                                         |
| GO:0000785 | chromatin          | 62 of 3038 in the list | 116 of 5465 in the genome | 1 | CCG017580.1,CCG009980.1,CCG010906.1,CCG015968.1,CCG018893.1,CCG019284.1,CCG010649.1,CCG010138.1,CCG008560.1,CCG025877.1,CCG010136.1,CCG008892.2,CCG021491.1,CCG010647.1,CCG003310.1,CCG027199.1,CCG027198.1,CCG013617.1,CCG008559.1,CCG018287.1,CCG026473.1,CCG012476.1,CCG014537.1,CCG027696.1,CCG010907.1,CCG010137.1,CCG010650.1,CCG012229.1,CCG009461.1,CCG005194.1,CCG024623.1,CCG025880.1,CCG024624.1,CCG014836.1,CCG010904.1,CCG024177.1,CCG009275.1,CCG004494.1,CCG002947.1,CCG004481.1,CCG010908.1,CCG012514.1,CCG027196.1,CCG014772.1,CCG005716.1,CCG027197.1,CCG026474.1,CCG022673.1,CCG026159.1,CCG027697.1,CCG020442.1,CCG010646.1,CCG017598.1,CCG025893.1,CCG027695.1,CCG024787.1,CCG012584.1,CCG010905.1,CCG008302.1,CCG010909.1,CCG010648.1,CCG024788.1 |



|            |                       |                        |                           |   |                                                                                                                                                                                                                                                                                                                                                                                                                                                                                                                                                                                                                                                                                                                                                                         |
|------------|-----------------------|------------------------|---------------------------|---|-------------------------------------------------------------------------------------------------------------------------------------------------------------------------------------------------------------------------------------------------------------------------------------------------------------------------------------------------------------------------------------------------------------------------------------------------------------------------------------------------------------------------------------------------------------------------------------------------------------------------------------------------------------------------------------------------------------------------------------------------------------------------|
| GO:0000786 | nucleosome            | 62 of 3038 in the list | 116 of 5465 in the genome | 1 | CCG017580.1,CCG009980.1,CCG010906.1,CCG015968.1,CCG018893.1,CCG019284.1,CCG010649.1,CCG010138.1,CCG008560.1,CCG025877.1,CCG010136.1,CCG008892.2,CCG021491.1,CCG010647.1,CCG003310.1,CCG027199.1,CCG027198.1,CCG013617.1,CCG008559.1,CCG018287.1,CCG026473.1,CCG012476.1,CCG014537.1,CCG027696.1,CCG010907.1,CCG010137.1,CCG010650.1,CCG012229.1,CCG009461.1,CCG005194.1,CCG024623.1,CCG025880.1,CCG024624.1,CCG014836.1,CCG010904.1,CCG024177.1,CCG009275.1,CCG004494.1,CCG002947.1,CCG004481.1,CCG010908.1,CCG012514.1,CCG027196.1,CCG014772.1,CCG005716.1,CCG027197.1,CCG026474.1,CCG022673.1,CCG026159.1,CCG027697.1,CCG020442.1,CCG010646.1,CCG017598.1,CCG025893.1,CCG027695.1,CCG024787.1,CCG012584.1,CCG010905.1,CCG008302.1,CCG010909.1,CCG010648.1,CCG024788.1 |
| GO:0044815 | DNA packaging complex | 62 of 3038 in the list | 116 of 5465 in the genome | 1 | CCG017580.1,CCG009980.1,CCG010906.1,CCG015968.1,CCG018893.1,CCG019284.1,CCG010649.1,CCG010138.1,CCG008560.1,CCG025877.1,CCG010136.1,CCG008892.2,CCG021491.1,CCG010647.1,CCG003310.1,CCG027199.1,CCG027198.1,CCG013617.1,CCG008559.1,CCG018287.1,CCG026473.1,CCG012476.1,CCG014537.1,CCG027696.1,CCG010907.1,CCG010137.1,CCG010650.1,CCG012229.1,CCG009461.1,CCG005194.1,CCG024623.1,CCG025880.1,CCG024624.1,CCG014836.1,CCG010904.1,CCG024177.1,CCG009275.1,CCG004494.1,CCG002947.1,CCG004481.1,CCG010908.1,CCG012514.1,CCG027196.1,CCG014772.1,CCG005716.1,CCG027197.1,CCG026474.1,CCG022673.1,CCG026159.1,CCG027697.1,CCG020442.1,CCG010646.1,CCG017598.1,CCG025893.1,CCG027695.1,CCG024787.1,CCG012584.1,CCG010905.1,CCG008302.1,CCG010909.1,CCG010648.1,CCG024788.1 |

|            |                     |                        |                           |   |                                                                                                                                                                                                                                                                                                                                                                                                                                                                                                                                                                                                                                                                                                                                                                                                 |
|------------|---------------------|------------------------|---------------------------|---|-------------------------------------------------------------------------------------------------------------------------------------------------------------------------------------------------------------------------------------------------------------------------------------------------------------------------------------------------------------------------------------------------------------------------------------------------------------------------------------------------------------------------------------------------------------------------------------------------------------------------------------------------------------------------------------------------------------------------------------------------------------------------------------------------|
| GO:1990104 | DNA bending complex | 62 of 3038 in the list | 116 of 5465 in the genome | 1 | CCG017580.1,CCG009980.1,CCG010906.1,CCG015968.1,CCG018893.1,CCG019284.1,CCG010649.1,CCG010138.1,CCG008560.1,CCG025877.1,CCG010136.1,CCG008892.2,CCG021491.1,CCG010647.1,CCG003310.1,CCG027199.1,CCG027198.1,CCG013617.1,CCG008559.1,CCG018287.1,CCG026473.1,CCG012476.1,CCG014537.1,CCG027696.1,CCG010907.1,CCG010137.1,CCG010650.1,CCG012229.1,CCG009461.1,CCG005194.1,CCG024623.1,CCG025880.1,CCG024624.1,CCG014836.1,CCG010904.1,CCG024177.1,CCG009275.1,CCG004494.1,CCG002947.1,CCG004481.1,CCG010908.1,CCG012514.1,CCG027196.1,CCG014772.1,CCG005716.1,CCG027197.1,CCG026474.1,CCG022673.1,CCG026159.1,CCG027697.1,CCG020442.1,CCG010646.1,CCG017598.1,CCG025893.1,CCG027695.1,CCG024787.1,CCG012584.1,CCG010905.1,CCG008302.1,CCG010909.1,CCG010648.1,CCG024788.1                         |
| GO:0032993 | protein-DNA complex | 64 of 3038 in the list | 120 of 5465 in the genome | 1 | CCG017580.1,CCG009980.1,CCG010906.1,CCG015968.1,CCG018893.1,CCG019284.1,CCG010649.1,CCG010138.1,CCG008560.1,CCG025877.1,CCG010136.1,CCG008892.2,CCG021491.1,CCG010647.1,CCG003310.1,CCG027199.1,CCG027198.1,CCG013617.1,CCG008559.1,CCG018287.1,CCG026473.1,CCG012476.1,CCG014537.1,CCG027696.1,CCG010907.1,CCG010137.1,CCG007767.1,CCG010650.1,CCG012229.1,CCG009461.1,CCG005194.1,CCG024623.1,CCG025880.1,CCG024624.1,CCG014836.1,CCG010904.1,CCG024177.1,CCG009275.1,CCG004494.1,CCG002947.1,CCG004481.1,CCG010908.1,CCG012514.1,CCG027196.1,CCG014772.1,CCG005716.1,CCG027197.1,CCG026474.1,CCG022673.1,CCG026159.1,CCG027697.1,CCG020442.1,CCG010646.1,CCG017598.1,CCG025893.1,CCG027695.1,CCG024787.1,CCG018249.1,CCG012584.1,CCG010905.1,CCG008302.1,CCG010909.1,CCG010648.1,CCG024788.1 |

|            |                                            |                        |                           |   |                                                                                                                                                                                                                                                                                                                                                                                                                                                                                                                                                                                                                                                                                                                                                                                                                                                                                                                                                                                                                                                 |
|------------|--------------------------------------------|------------------------|---------------------------|---|-------------------------------------------------------------------------------------------------------------------------------------------------------------------------------------------------------------------------------------------------------------------------------------------------------------------------------------------------------------------------------------------------------------------------------------------------------------------------------------------------------------------------------------------------------------------------------------------------------------------------------------------------------------------------------------------------------------------------------------------------------------------------------------------------------------------------------------------------------------------------------------------------------------------------------------------------------------------------------------------------------------------------------------------------|
| GO:0031090 | organelle membrane                         | 84 of 3038 in the list | 157 of 5465 in the genome | 1 | CCG022047.1,CCG018832.1,CCG011932.1,CCG019892.1,CCG020245.1,CCG021819.1,CCG018536.1,CCG000663.1,CCG011023.1,CCG019590.1,CCG000210.1,CCG000585.1,CCG000205.1,CCG004806.1,CCG022802.1,CCG007330.1,CCG010112.1,CCG004091.1,CCG011813.1,CCG017614.1,CCG020315.1,CCG016304.1,CCG015843.1,CCG019217.1,CCG000010.1,CCG013643.1,CCG004155.2,CCG022209.1,CCG018684.1,CCG009434.1,CCG001279.1,CCG000148.1,CCG002790.1,CCG005924.2,CCG024760.1,CCG010939.1,CCG028332.1,CCG019210.1,CCG026514.1,CCG010178.1,CCG002930.1,CCG017989.1,CCG016673.1,CCG000102.1,CCG009082.1,CCG026620.1,CCG013131.1,CCG019367.2,CCG026370.1,CCG015800.2,CCG025309.1,CCG012534.1,CCG016003.1,CCG026146.1,CCG011381.1,CCG028425.2,CCG024119.1,CCG027362.1,CCG023814.2,CCG026240.1,CCG019797.1,CCG013013.1,CCG015087.1,CCG006459.1,CCG014304.1,CCG025233.1,CCG005677.1,CCG015410.1,CCG007862.1,CCG017241.1,CCG025107.1,CCG009142.1,CCG017197.1,CCG010696.1,CCG012350.1,CCG000552.1,CCG006223.1,CCG007989.1,CCG003110.1,CCG014053.1,CCG003192.1,CCG017125.1,CCG025163.3,CCG003251.1 |
| GO:0008305 | integrin complex                           | 4 of 3038 in the list  | 8 of 5465 in the genome   | 1 | CCG004279.1,CCG000526.1,CCG024898.1,CCG025334.1                                                                                                                                                                                                                                                                                                                                                                                                                                                                                                                                                                                                                                                                                                                                                                                                                                                                                                                                                                                                 |
| GO:0043235 | receptor complex                           | 4 of 3038 in the list  | 8 of 5465 in the genome   | 1 | CCG004279.1,CCG000526.1,CCG024898.1,CCG025334.1                                                                                                                                                                                                                                                                                                                                                                                                                                                                                                                                                                                                                                                                                                                                                                                                                                                                                                                                                                                                 |
| GO:0048500 | signal recognition                         | 4 of 3038 in the list  | 8 of 5465 in the genome   | 1 | CCG006714.1,CCG018217.1,CCG000614.1,CCG020806.1                                                                                                                                                                                                                                                                                                                                                                                                                                                                                                                                                                                                                                                                                                                                                                                                                                                                                                                                                                                                 |
| GO:0016272 | prefoldin complex                          | 6 of 3038 in the list  | 12 of 5465 in the genome  | 1 | CCG009266.1,CCG027653.1,CCG025028.1,CCG007108.1,CCG017448.1,CCG011095.1                                                                                                                                                                                                                                                                                                                                                                                                                                                                                                                                                                                                                                                                                                                                                                                                                                                                                                                                                                         |
| GO:0019028 | viral capsid                               | 6 of 3038 in the list  | 12 of 5465 in the genome  | 1 | CCG025780.1,CCG000477.1,CCG014038.1,CCG000478.1,CCG013201.1,CCG025779.1                                                                                                                                                                                                                                                                                                                                                                                                                                                                                                                                                                                                                                                                                                                                                                                                                                                                                                                                                                         |
| GO:0044423 | virion part                                | 6 of 3038 in the list  | 12 of 5465 in the genome  | 1 | CCG025780.1,CCG000477.1,CCG014038.1,CCG000478.1,CCG013201.1,CCG025779.1                                                                                                                                                                                                                                                                                                                                                                                                                                                                                                                                                                                                                                                                                                                                                                                                                                                                                                                                                                         |
| GO:0005853 | eukaryotic translation elongation factor 1 | 3 of 3038 in the list  | 6 of 5465 in the genome   | 1 | CCG005143.1,CCG000994.1,CCG027751.1                                                                                                                                                                                                                                                                                                                                                                                                                                                                                                                                                                                                                                                                                                                                                                                                                                                                                                                                                                                                             |
| GO:0012507 | ER to Golgi transport                      | 3 of 3038 in the list  | 6 of 5465 in the genome   | 1 | CCG015800.2,CCG015087.1,CCG000010.1                                                                                                                                                                                                                                                                                                                                                                                                                                                                                                                                                                                                                                                                                                                                                                                                                                                                                                                                                                                                             |
| GO:0030127 | COPII vesicle coat                         | 3 of 3038 in the list  | 6 of 5465 in the genome   | 1 | CCG015800.2,CCG015087.1,CCG000010.1                                                                                                                                                                                                                                                                                                                                                                                                                                                                                                                                                                                                                                                                                                                                                                                                                                                                                                                                                                                                             |
| GO:0030134 | ER to Golgi transport                      | 3 of 3038 in the list  | 6 of 5465 in the genome   | 1 | CCG015800.2,CCG015087.1,CCG000010.1                                                                                                                                                                                                                                                                                                                                                                                                                                                                                                                                                                                                                                                                                                                                                                                                                                                                                                                                                                                                             |

|            |                                             |                        |                          |   |                                                                                                                                                                                                                                                                                                                                                                                                                                                                         |
|------------|---------------------------------------------|------------------------|--------------------------|---|-------------------------------------------------------------------------------------------------------------------------------------------------------------------------------------------------------------------------------------------------------------------------------------------------------------------------------------------------------------------------------------------------------------------------------------------------------------------------|
| GO:000775  | chromosome,                                 | 2 of 3038 in the list  | 4 of 5465 in the genome  | 1 | CCG018249.1,CCG007767.1                                                                                                                                                                                                                                                                                                                                                                                                                                                 |
| GO:0005604 | basement membrane                           | 2 of 3038 in the list  | 4 of 5465 in the genome  | 1 | CCG015389.1,CCG008431.1                                                                                                                                                                                                                                                                                                                                                                                                                                                 |
| GO:0005672 | transcription factor                        | 2 of 3038 in the list  | 4 of 5465 in the genome  | 1 | CCG000158.1,CCG001292.1                                                                                                                                                                                                                                                                                                                                                                                                                                                 |
| GO:0005971 | ribonucleoside-diphosphate reductase        | 2 of 3038 in the list  | 4 of 5465 in the genome  | 1 | CCG024232.1,CCG015929.1                                                                                                                                                                                                                                                                                                                                                                                                                                                 |
| GO:0005783 | endoplasmic reticulum                       | 38 of 3038 in the list | 73 of 5465 in the genome | 1 | CCG022047.1,CCG027415.1,CCG018536.1,CCG013390.1,CCG023617.1,CCG019431.1,CCG000663.1,CCG013131.1,CCG019367.2,CCG026370.1,CCG002783.1,CCG009928.1,CCG004806.1,CCG026146.1,CCG017528.1,CCG027023.1,CCG023114.1,CCG007330.1,CCG004091.1,CCG015843.1,CCG023834.2,CCG025233.1,CCG017241.1,CCG022209.1,CCG019560.1,CCG009434.1,CCG027585.1,CCG000552.1,CCG009267.1,CCG024760.1,CCG000895.1,CCG028332.1,CCG002374.1,CCG003110.1,CCG027004.1,CCG003192.1,CCG002930.1,CCG003251.1 |
| GO:0044431 | Golgi apparatus part                        | 22 of 3038 in the list | 43 of 5465 in the genome | 1 | CCG014304.1,CCG003880.1,CCG019892.1,CCG021819.1,CCG009082.1,CCG026620.1,CCG017197.1,CCG011023.1,CCG027692.1,CCG000210.1,CCG025309.1,CCG016003.1,CCG012350.1,CCG007989.1,CCG021053.1,CCG027362.1,CCG011813.1,CCG019210.1,CCG011862.1,CCG020315.1,CCG013126.2,CCG016673.1                                                                                                                                                                                                 |
| GO:0031300 | intrinsic component of organelle membrane   | 17 of 3038 in the list | 34 of 5465 in the genome | 1 | CCG022047.1,CCG025233.1,CCG022209.1,CCG006223.1,CCG028332.1,CCG007330.1,CCG028425.2,CCG019210.1,CCG019367.2,CCG019797.1,CCG019217.1,CCG026514.1,CCG010178.1,CCG002930.1,CCG000552.1,CCG026146.1,CCG017989.1                                                                                                                                                                                                                                                             |
| GO:0015935 | small ribosomal subunit                     | 7 of 3038 in the list  | 15 of 5465 in the genome | 1 | CCG002408.1,CCG027748.1,CCG008569.1,CCG020963.1,CCG016399.1,CCG005442.1,CCG009394.1                                                                                                                                                                                                                                                                                                                                                                                     |
| GO:0019898 | extrinsic component of membrane             | 5 of 3038 in the list  | 11 of 5465 in the genome | 1 | CCG009446.1,CCG006412.1,CCG012573.1,CCG007985.1,CCG024952.1                                                                                                                                                                                                                                                                                                                                                                                                             |
| GO:0005774 | vacuolar membrane                           | 3 of 3038 in the list  | 7 of 5465 in the genome  | 1 | CCG010696.1,CCG000585.1,CCG012534.1                                                                                                                                                                                                                                                                                                                                                                                                                                     |
| GO:0016471 | vacuolar proton-transporting V-type         | 3 of 3038 in the list  | 7 of 5465 in the genome  | 1 | CCG010696.1,CCG000585.1,CCG012534.1                                                                                                                                                                                                                                                                                                                                                                                                                                     |
| GO:0030176 | integral component of endoplasmic reticulum | 3 of 3038 in the list  | 7 of 5465 in the genome  | 1 | CCG022047.1,CCG019367.2,CCG026146.1                                                                                                                                                                                                                                                                                                                                                                                                                                     |

|            |                                                       |                        |                          |   |                                                                                                                                                                                                                                                                                                                                                                                                                                                                                     |
|------------|-------------------------------------------------------|------------------------|--------------------------|---|-------------------------------------------------------------------------------------------------------------------------------------------------------------------------------------------------------------------------------------------------------------------------------------------------------------------------------------------------------------------------------------------------------------------------------------------------------------------------------------|
| GO:0044437 | vacuolar part                                         | 3 of 3038 in the list  | 7 of 5465 in the genome  | 1 | CCG010696.1,CCG000585.1,CCG012534.1                                                                                                                                                                                                                                                                                                                                                                                                                                                 |
| GO:0000145 | exocyst                                               | 2 of 3038 in the list  | 5 of 5465 in the genome  | 1 | CCG002937.1,CCG016493.2                                                                                                                                                                                                                                                                                                                                                                                                                                                             |
| GO:0005938 | cell cortex                                           | 2 of 3038 in the list  | 5 of 5465 in the genome  | 1 | CCG002937.1,CCG016493.2                                                                                                                                                                                                                                                                                                                                                                                                                                                             |
| GO:0008290 | F-actin capping protein                               | 2 of 3038 in the list  | 5 of 5465 in the genome  | 1 | CCG019356.1,CCG008834.1                                                                                                                                                                                                                                                                                                                                                                                                                                                             |
| GO:0044448 | cell cortex part                                      | 2 of 3038 in the list  | 5 of 5465 in the genome  | 1 | CCG002937.1,CCG016493.2                                                                                                                                                                                                                                                                                                                                                                                                                                                             |
| GO:0033177 | proton-transporting two-sector ATPase                 | 8 of 3038 in the list  | 18 of 5465 in the genome | 1 | CCG025450.1,CCG025107.1,CCG010112.1,CCG009142.1,CCG000148.1,CCG003662.1,CCG013643.1,CCG008422.1                                                                                                                                                                                                                                                                                                                                                                                     |
| GO:1990204 | oxidoreductase                                        | 4 of 3038 in the list  | 10 of 5465 in the genome | 1 | CCG009685.1,CCG024232.1,CCG014228.2,CCG015929.1                                                                                                                                                                                                                                                                                                                                                                                                                                     |
| GO:0005886 | plasma membrane                                       | 39 of 3038 in the list | 80 of 5465 in the genome | 1 | CCG024952.1,CCG007182.1,CCG025334.1,CCG016263.1,CCG004279.1,CCG001422.1,CCG009446.1,CCG007356.1,CCG002839.1,CCG007575.1,CCG020013.1,CCG004542.1,CCG005277.1,CCG014158.1,CCG015914.1,CCG018801.1,CCG007117.1,CCG024898.1,CCG013707.1,CCG025568.1,CCG012573.1,CCG017729.1,CCG022137.1,CCG006803.1,CCG028158.1,CCG006412.1,CCG019647.1,CCG000127.1,CCG012634.1,CCG022540.1,CCG000526.1,CCG016864.1,CCG011730.1,CCG027899.1,CCG002559.1,CCG016446.1,CCG027757.1,CCG027498.1,CCG013255.1 |
| GO:0005777 | peroxisome                                            | 10 of 3038 in the list | 23 of 5465 in the genome | 1 | CCG018832.1,CCG006223.1,CCG006391.1,CCG025521.1,CCG019797.1,CCG018851.1,CCG007979.1,CCG019217.1,CCG010178.1,CCG000591.1                                                                                                                                                                                                                                                                                                                                                             |
| GO:0042579 | microbody                                             | 10 of 3038 in the list | 23 of 5465 in the genome | 1 | CCG018832.1,CCG006223.1,CCG006391.1,CCG025521.1,CCG019797.1,CCG018851.1,CCG007979.1,CCG019217.1,CCG010178.1,CCG000591.1                                                                                                                                                                                                                                                                                                                                                             |
| GO:0008021 | synaptic vesicle                                      | 3 of 3038 in the list  | 8 of 5465 in the genome  | 1 | CCG027412.1,CCG008323.1,CCG005191.1                                                                                                                                                                                                                                                                                                                                                                                                                                                 |
| GO:0031227 | intrinsic component of endoplasmic reticulum membrane | 9 of 3038 in the list  | 21 of 5465 in the genome | 1 | CCG022047.1,CCG025233.1,CCG022209.1,CCG028332.1,CCG007330.1,CCG019367.2,CCG002930.1,CCG026146.1,CCG000552.1                                                                                                                                                                                                                                                                                                                                                                         |
| GO:0019012 | virion                                                | 6 of 3038 in the list  | 15 of 5465 in the genome | 1 | CCG025780.1,CCG000477.1,CCG014038.1,CCG000478.1,CCG013201.1,CCG025779.1                                                                                                                                                                                                                                                                                                                                                                                                             |

|            |                                                          |                        |                          |   |                                                                                                                                                                                                                                                                                                             |
|------------|----------------------------------------------------------|------------------------|--------------------------|---|-------------------------------------------------------------------------------------------------------------------------------------------------------------------------------------------------------------------------------------------------------------------------------------------------------------|
| GO:0044421 | extracellular region part                                | 25 of 3038 in the list | 54 of 5465 in the genome | 1 | CCG003774.2,CCG005113.1,CCG004025.1,CCG003882.1,CCG007376.1,CCG015746.1,CCG004326.1,CCG015389.1,CCG008431.1,CCG022425.1,CCG015747.1,CCG004982.1,CCG013615.1,CCG024731.1,CCG006702.1,CCG003745.1,CCG008759.1,CCG020089.1,CCG026583.1,CCG026537.1,CCG025670.1,CCG017112.1,CCG026865.1,CCG005060.1,CCG014689.1 |
| GO:0033178 | proton-transporting two-sector ATPase complex, catalytic | 12 of 3038 in the list | 29 of 5465 in the genome | 1 | CCG015410.1,CCG002038.1,CCG023640.1,CCG001066.1,CCG000585.1,CCG025348.1,CCG007724.1,CCG006486.1,CCG021934.1,CCG019619.1,CCG005924.2,CCG001285.1                                                                                                                                                             |
| GO:0016469 | proton-transporting two-sector ATPase complex            | 23 of 3038 in the list | 52 of 5465 in the genome | 1 | CCG015410.1,CCG002038.1,CCG025107.1,CCG009142.1,CCG023640.1,CCG010696.1,CCG000148.1,CCG000585.1,CCG025348.1,CCG003662.1,CCG012534.1,CCG006486.1,CCG019619.1,CCG005924.2,CCG008422.1,CCG025450.1,CCG010112.1,CCG001066.1,CCG019678.1,CCG007724.1,CCG021934.1,CCG013643.1,CCG001285.1                         |
| GO:0019773 | proteasome core complex, alpha-subunit                   | 4 of 3038 in the list  | 12 of 5465 in the genome | 1 | CCG008217.1,CCG026413.3,CCG024679.1,CCG014393.1                                                                                                                                                                                                                                                             |
| GO:0019867 | outer membrane                                           | 4 of 3038 in the list  | 12 of 5465 in the genome | 1 | CCG026240.1,CCG001279.1,CCG013013.1,CCG001246.1                                                                                                                                                                                                                                                             |
| GO:0030119 | AP-type membrane                                         | 4 of 3038 in the list  | 12 of 5465 in the genome | 1 | CCG027692.1,CCG007283.1,CCG021800.1,CCG013126.2                                                                                                                                                                                                                                                             |
| GO:0030131 | clathrin adaptor                                         | 4 of 3038 in the list  | 12 of 5465 in the genome | 1 | CCG027692.1,CCG007283.1,CCG021800.1,CCG013126.2                                                                                                                                                                                                                                                             |
| GO:0044432 | endoplasmic reticulum part                               | 23 of 3038 in the list | 53 of 5465 in the genome | 1 | CCG022047.1,CCG025233.1,CCG022209.1,CCG017241.1,CCG018536.1,CCG009434.1,CCG000663.1,CCG013131.1,CCG019367.2,CCG026370.1,CCG004806.1,CCG000552.1,CCG026146.1,CCG024760.1,CCG028332.1,CCG002374.1,CCG007330.1,CCG004091.1,CCG003110.1,CCG003192.1,CCG015843.1,CCG002930.1,CCG003251.1                         |
| GO:0005789 | endoplasmic reticulum membrane                           | 22 of 3038 in the list | 51 of 5465 in the genome | 1 | CCG022047.1,CCG025233.1,CCG022209.1,CCG017241.1,CCG018536.1,CCG009434.1,CCG000663.1,CCG013131.1,CCG019367.2,CCG026370.1,CCG004806.1,CCG000552.1,CCG026146.1,CCG024760.1,CCG028332.1,CCG007330.1,CCG004091.1,CCG003110.1,CCG003192.1,CCG015843.1,CCG002930.1,CCG003251.1                                     |

|            |                                                               |                        |                          |   |                                                                                                                                                                                                                                                                                     |
|------------|---------------------------------------------------------------|------------------------|--------------------------|---|-------------------------------------------------------------------------------------------------------------------------------------------------------------------------------------------------------------------------------------------------------------------------------------|
| GO:0042175 | nuclear outer membrane-endoplasmic reticulum membrane network | 22 of 3038 in the list | 51 of 5465 in the genome | 1 | CCG022047.1,CCG025233.1,CCG022209.1,CCG017241.1,CCG018536.1,CCG009434.1,CCG000663.1,CCG013131.1,CCG019367.2,CCG026370.1,CCG004806.1,CCG000552.1,CCG026146.1,CCG024760.1,CCG028332.1,CCG007330.1,CCG004091.1,CCG003110.1,CCG003192.1,CCG015843.1,CCG002930.1,CCG003251.1             |
| GO:0005741 | mitochondrial outer                                           | 3 of 3038 in the list  | 10 of 5465 in the genome | 1 | CCG026240.1,CCG001279.1,CCG013013.1                                                                                                                                                                                                                                                 |
| GO:0030133 | transport vesicle                                             | 3 of 3038 in the list  | 10 of 5465 in the genome | 1 | CCG015800.2,CCG015087.1,CCG000010.1                                                                                                                                                                                                                                                 |
| GO:0030658 | transport vesicle                                             | 3 of 3038 in the list  | 10 of 5465 in the genome | 1 | CCG015800.2,CCG015087.1,CCG000010.1                                                                                                                                                                                                                                                 |
| GO:0031968 | organelle outer                                               | 3 of 3038 in the list  | 10 of 5465 in the genome | 1 | CCG026240.1,CCG001279.1,CCG013013.1                                                                                                                                                                                                                                                 |
| GO:0044459 | plasma membrane part                                          | 23 of 3038 in the list | 54 of 5465 in the genome | 1 | CCG025568.1,CCG012573.1,CCG022137.1,CCG024952.1,CCG025334.1,CCG006803.1,CCG004279.1,CCG009446.1,CCG006412.1,CCG019647.1,CCG002839.1,CCG022540.1,CCG000526.1,CCG016864.1,CCG005277.1,CCG011730.1,CCG015914.1,CCG014158.1,CCG002559.1,CCG027899.1,CCG018801.1,CCG024898.1,CCG027498.1 |
| GO:0005615 | extracellular space                                           | 16 of 3038 in the list | 41 of 5465 in the genome | 1 | CCG003774.2,CCG005113.1,CCG004025.1,CCG007376.1,CCG015746.1,CCG022425.1,CCG015747.1,CCG013615.1,CCG024731.1,CCG003745.1,CCG008759.1,CCG026537.1,CCG017112.1,CCG026865.1,CCG005060.1,CCG014689.1                                                                                     |
| GO:0030136 | clathrin-coated vesicle                                       | 3 of 3038 in the list  | 12 of 5465 in the genome | 1 | CCG027412.1,CCG008323.1,CCG005191.1                                                                                                                                                                                                                                                 |

|            |                        |                         |                           |   |                                                                                                                                                                                                                                                                                                                                                                                                                                                                                                                                                                                                                                                                                                                                                                                                                                                                                                                                                                                                                                                                                                                                                                                                                                                                                                                                                                                                                                                                                                                                                                                 |
|------------|------------------------|-------------------------|---------------------------|---|---------------------------------------------------------------------------------------------------------------------------------------------------------------------------------------------------------------------------------------------------------------------------------------------------------------------------------------------------------------------------------------------------------------------------------------------------------------------------------------------------------------------------------------------------------------------------------------------------------------------------------------------------------------------------------------------------------------------------------------------------------------------------------------------------------------------------------------------------------------------------------------------------------------------------------------------------------------------------------------------------------------------------------------------------------------------------------------------------------------------------------------------------------------------------------------------------------------------------------------------------------------------------------------------------------------------------------------------------------------------------------------------------------------------------------------------------------------------------------------------------------------------------------------------------------------------------------|
| GO:0032991 | macromolecular complex | 460 of 3038 in the list | 888 of 5465 in the genome | 1 | CCG014531.2,CCG011932.1,CCG027068.1,CCG026177.1,CCG001809.1,CCG013430.1,CCG006357.1,CCG024695.1,CCG000585.1,CCG010647.1,CCG005370.1,CCG026882.1,CCG002354.1,CCG026473.1,CCG001167.1,CCG004091.1,CCG001292.1,CCG028326.3,CCG003573.1,CCG028505.1,CCG025223.1,CCG006134.1,CCG005194.1,CCG014836.1,CCG024177.1,CCG012573.1,CCG008431.1,CCG012514.1,CCG003362.1,CCG027196.1,CCG016370.1,CCG026413.3,CCG012536.1,CCG026871.2,CCG027796.1,CCG018533.1,CCG025450.1,CCG000526.1,CCG021911.1,CCG010905.1,CCG028046.1,CCG008270.1,CCG006714.1,CCG011862.1,CCG027899.1,CCG011764.1,CCG010909.1,CCG008808.1,CCG014195.1,CCG005737.1,CCG011911.1,CCG028653.1,CCG026212.1,CCG009249.1,CCG014896.1,CCG017580.1,CCG024952.1,CCG009980.1,CCG002735.1,CCG001863.1,CCG016493.2,CCG009822.1,CCG004279.1,CCG010649.1,CCG004212.1,CCG019571.1,CCG012534.1,CCG007647.1,CCG016189.1,CCG004331.1,CCG018788.1,CCG025396.1,CCG006484.1,CCG021633.1,CCG019029.1,CCG006344.1,CCG008559.1,CCG001461.1,CCG027696.1,CCG026280.1,CCG005480.2,CCG024432.2,CCG023686.1,CCG019678.1,CCG021737.1,CCG000773.1,CCG009543.1,CCG004494.1,CCG001698.1,CCG003104.1,CCG021228.1,CCG022214.1,CCG006412.1,CCG022673.1,CCG019647.1,CCG026159.1,CCG016399.1,CCG004927.1,CCG016307.1,CCG009805.2,CCG012556.1,CCG002852.1,CCG002966.1,CCG020634.1,CCG019250.1,CCG008557.1,CCG018402.1,CCG012584.1,CCG018688.1,CCG014228.2,CCG021895.1,CCG010024.1,CCG017141.1,CCG025747.1,CCG027748.1,CCG002937.1,CCG024788.1,CCG000294.1,CCG005168.1,CCG018184.1,CCG018315.1,CCG001285.1,CCG003060.1,CCG000789.1,CCG016778.1,CCG004955.1,CCG0073 |
| GO:0030118 | clathrin coat          | 4 of 3038 in the list   | 16 of 5465 in the genome  | 1 | CCG027692.1,CCG007283.1,CCG021800.1,CCG013126.2                                                                                                                                                                                                                                                                                                                                                                                                                                                                                                                                                                                                                                                                                                                                                                                                                                                                                                                                                                                                                                                                                                                                                                                                                                                                                                                                                                                                                                                                                                                                 |
| GO:0031012 | extracellular matrix   | 15 of 3038 in the list  | 43 of 5465 in the genome  | 1 | CCG016175.1,CCG003882.1,CCG020089.1,CCG004326.1,CCG026583.1,CCG015389.1,CCG008431.1,CCG022450.1,CCG004982.1,CCG025670.1,CCG015206.1,CCG015843.1,CCG013615.1,CCG006702.1,CCG002163.1                                                                                                                                                                                                                                                                                                                                                                                                                                                                                                                                                                                                                                                                                                                                                                                                                                                                                                                                                                                                                                                                                                                                                                                                                                                                                                                                                                                             |
| GO:0030120 | vesicle coat           | 4 of 3038 in the list   | 17 of 5465 in the genome  | 1 | CCG015800.2,CCG015087.1,CCG000010.1,CCG011813.1                                                                                                                                                                                                                                                                                                                                                                                                                                                                                                                                                                                                                                                                                                                                                                                                                                                                                                                                                                                                                                                                                                                                                                                                                                                                                                                                                                                                                                                                                                                                 |



|            |                                   |                        |                           |   |                                                                                                                                                                                                                                                                                                                                                                                                                                                                                                                                                 |
|------------|-----------------------------------|------------------------|---------------------------|---|-------------------------------------------------------------------------------------------------------------------------------------------------------------------------------------------------------------------------------------------------------------------------------------------------------------------------------------------------------------------------------------------------------------------------------------------------------------------------------------------------------------------------------------------------|
| GO:0030135 | coated vesicle                    | 7 of 3038 in the list  | 25 of 5465 in the genome  | 1 | CCG015800.2,CCG015087.1,CCG000010.1,CCG027412.1,CCG008323.1,CCG005191.1,CCG011813.1                                                                                                                                                                                                                                                                                                                                                                                                                                                             |
| GO:0000502 | proteasome complex                | 9 of 3038 in the list  | 30 of 5465 in the genome  | 1 | CCG008217.1,CCG026177.1,CCG010543.1,CCG014393.1,CCG023270.1,CCG013832.1,CCG026413.3,CCG024679.1,CCG027736.1                                                                                                                                                                                                                                                                                                                                                                                                                                     |
| GO:0034702 | ion channel complex               | 6 of 3038 in the list  | 23 of 5465 in the genome  | 1 | CCG025568.1,CCG015914.1,CCG002559.1,CCG019647.1,CCG016864.1,CCG005277.1                                                                                                                                                                                                                                                                                                                                                                                                                                                                         |
| GO:0034703 | cation channel complex            | 6 of 3038 in the list  | 23 of 5465 in the genome  | 1 | CCG025568.1,CCG015914.1,CCG002559.1,CCG019647.1,CCG016864.1,CCG005277.1                                                                                                                                                                                                                                                                                                                                                                                                                                                                         |
| GO:1902495 | transmembrane transporter complex | 6 of 3038 in the list  | 23 of 5465 in the genome  | 1 | CCG025568.1,CCG015914.1,CCG002559.1,CCG019647.1,CCG016864.1,CCG005277.1                                                                                                                                                                                                                                                                                                                                                                                                                                                                         |
| GO:0071944 | cell periphery                    | 44 of 3038 in the list | 107 of 5465 in the genome | 1 | CCG001584.1,CCG024952.1,CCG007182.1,CCG025334.1,CCG016263.1,CCG016493.2,CCG004279.1,CCG001422.1,CCG009446.1,CCG007356.1,CCG002839.1,CCG004844.1,CCG007575.1,CCG020013.1,CCG004542.1,CCG005277.1,CCG021686.1,CCG014158.1,CCG015914.1,CCG018801.1,CCG007117.1,CCG024898.1,CCG013707.1,CCG025568.1,CCG012573.1,CCG017729.1,CCG022137.1,CCG006803.1,CCG028158.1,CCG006412.1,CCG019647.1,CCG000127.1,CCG012634.1,CCG022540.1,CCG000526.1,CCG016864.1,CCG011730.1,CCG027899.1,CCG002559.1,CCG016446.1,CCG002937.1,CCG027757.1,CCG027498.1,CCG013255.1 |

|            |                                        |                         |                           |   |                                                                                                                                                                                                                                                                                                                                                                                                                                                                                                                                                                                                                                                                                                                                                                                                                                                                                                                                                                                                                                                                                                                                                                                                                                                                                                                                                                                                                                     |
|------------|----------------------------------------|-------------------------|---------------------------|---|-------------------------------------------------------------------------------------------------------------------------------------------------------------------------------------------------------------------------------------------------------------------------------------------------------------------------------------------------------------------------------------------------------------------------------------------------------------------------------------------------------------------------------------------------------------------------------------------------------------------------------------------------------------------------------------------------------------------------------------------------------------------------------------------------------------------------------------------------------------------------------------------------------------------------------------------------------------------------------------------------------------------------------------------------------------------------------------------------------------------------------------------------------------------------------------------------------------------------------------------------------------------------------------------------------------------------------------------------------------------------------------------------------------------------------------|
| GO:0005576 | extracellular region                   | 115 of 3038 in the list | 250 of 5465 in the genome | 1 | CCG010077.1,CCG003882.1,CCG006912.1,CCG017730.1,CCG005809.1,CCG021005.1,CCG008826.1,CCG013453.1,CCG012504.1,CCG013273.1,CCG022261.1,CCG007152.1,CCG002694.1,CCG026583.1,CCG007817.1,CCG011695.1,CCG022262.1,CCG007816.1,CCG019884.1,CCG006002.1,CCG005113.1,CCG025139.1,CCG007376.1,CCG008431.1,CCG002170.1,CCG009992.1,CCG020165.1,CCG005170.1,CCG023922.1,CCG007814.1,CCG006911.1,CCG013615.1,CCG028185.1,CCG022378.1,CCG024731.1,CCG006375.1,CCG026626.1,CCG017079.1,CCG023923.1,CCG019371.1,CCG027424.1,CCG014180.1,CCG026537.1,CCG007219.1,CCG012984.1,CCG017112.1,CCG003601.1,CCG010019.1,CCG003966.1,CCG014791.1,CCG016153.1,CCG011972.1,CCG004025.1,CCG015746.1,CCG004326.1,CCG015090.1,CCG028548.1,CCG025560.1,CCG020988.1,CCG004982.1,CCG010728.1,CCG014650.1,CCG019402.1,CCG017862.1,CCG023926.1,CCG022227.1,CCG001996.1,CCG026763.1,CCG012725.1,CCG019785.1,CCG001154.1,CCG003745.1,CCG016069.1,CCG008759.1,CCG023924.1,CCG006489.1,CCG025670.1,CCG012125.1,CCG025962.1,CCG012149.1,CCG024173.1,CCG000656.1,CCG014181.1,CCG014689.1,CCG025030.1,CCG000044.1,CCG013298.1,CCG028308.1,CCG003774.2,CCG023925.1,CCG011257.1,CCG015389.1,CCG018642.1,CCG022425.1,CCG015747.1,CCG015306.1,CCG015029.1,CCG013409.1,CCG026044.1,CCG007963.1,CCG015804.1,CCG006702.1,CCG018643.1,CCG020089.1,CCG014615.1,CCG026552.1,CCG023420.1,CCG000501.1,CCG010727.1,CCG028454.1,CCG020663.1,CCG026865.1,CCG005060.1,CCG028648.1,CCG000897.1 |
| GO:0005887 | integral component of plasma membrane  | 8 of 3038 in the list   | 29 of 5465 in the genome  | 1 | CCG000526.1,CCG025334.1,CCG016864.1,CCG015914.1,CCG004279.1,CCG002559.1,CCG019647.1,CCG024898.1                                                                                                                                                                                                                                                                                                                                                                                                                                                                                                                                                                                                                                                                                                                                                                                                                                                                                                                                                                                                                                                                                                                                                                                                                                                                                                                                     |
| GO:0031226 | intrinsic component of plasma membrane | 8 of 3038 in the list   | 29 of 5465 in the genome  | 1 | CCG000526.1,CCG025334.1,CCG016864.1,CCG015914.1,CCG004279.1,CCG002559.1,CCG019647.1,CCG024898.1                                                                                                                                                                                                                                                                                                                                                                                                                                                                                                                                                                                                                                                                                                                                                                                                                                                                                                                                                                                                                                                                                                                                                                                                                                                                                                                                     |
| GO:0012506 | vesicle membrane                       | 4 of 3038 in the list   | 19 of 5465 in the genome  | 1 | CCG015800.2,CCG015087.1,CCG000010.1,CCG011813.1                                                                                                                                                                                                                                                                                                                                                                                                                                                                                                                                                                                                                                                                                                                                                                                                                                                                                                                                                                                                                                                                                                                                                                                                                                                                                                                                                                                     |
| GO:0030659 | cytoplasmic vesicle                    | 4 of 3038 in the list   | 19 of 5465 in the genome  | 1 | CCG015800.2,CCG015087.1,CCG000010.1,CCG011813.1                                                                                                                                                                                                                                                                                                                                                                                                                                                                                                                                                                                                                                                                                                                                                                                                                                                                                                                                                                                                                                                                                                                                                                                                                                                                                                                                                                                     |

|            |                              |                        |                          |   |                                                                                                                                                             |
|------------|------------------------------|------------------------|--------------------------|---|-------------------------------------------------------------------------------------------------------------------------------------------------------------|
| GO:0030662 | coated vesicle               | 4 of 3038 in the list  | 19 of 5465 in the genome | 1 | CCG015800.2,CCG015087.1,CCG000010.1,CCG011813.1                                                                                                             |
| GO:0044433 | cytoplasmic vesicle          | 4 of 3038 in the list  | 19 of 5465 in the genome | 1 | CCG015800.2,CCG015087.1,CCG000010.1,CCG011813.1                                                                                                             |
| GO:0005839 | proteasome core complex      | 6 of 3038 in the list  | 25 of 5465 in the genome | 1 | CCG013832.1,CCG008217.1,CCG026413.3,CCG024679.1,CCG014393.1,CCG023270.1                                                                                     |
| GO:0016023 | cytoplasmic membrane-bounded | 7 of 3038 in the list  | 28 of 5465 in the genome | 1 | CCG015800.2,CCG015087.1,CCG000010.1,CCG027412.1,CCG008323.1,CCG005191.1,CCG011813.1                                                                         |
| GO:0031410 | cytoplasmic vesicle          | 7 of 3038 in the list  | 28 of 5465 in the genome | 1 | CCG015800.2,CCG015087.1,CCG000010.1,CCG027412.1,CCG008323.1,CCG005191.1,CCG011813.1                                                                         |
| GO:0031982 | vesicle                      | 7 of 3038 in the list  | 28 of 5465 in the genome | 1 | CCG015800.2,CCG015087.1,CCG000010.1,CCG027412.1,CCG008323.1,CCG005191.1,CCG011813.1                                                                         |
| GO:0031988 | membrane-bounded vesicle     | 7 of 3038 in the list  | 28 of 5465 in the genome | 1 | CCG015800.2,CCG015087.1,CCG000010.1,CCG027412.1,CCG008323.1,CCG005191.1,CCG011813.1                                                                         |
| GO:0008076 | voltage-gated                | 3 of 3038 in the list  | 17 of 5465 in the genome | 1 | CCG002559.1,CCG019647.1,CCG016864.1                                                                                                                         |
| GO:0034705 | potassium channel            | 3 of 3038 in the list  | 17 of 5465 in the genome | 1 | CCG002559.1,CCG019647.1,CCG016864.1                                                                                                                         |
| GO:0030117 | membrane coat                | 13 of 3038 in the list | 43 of 5465 in the genome | 1 | CCG027257.1,CCG026698.1,CCG020634.1,CCG007283.1,CCG011813.1,CCG023756.1,CCG027692.1,CCG015800.2,CCG015087.1,CCG015568.1,CCG000010.1,CCG021800.1,CCG013126.2 |
| GO:0048475 | coated membrane              | 13 of 3038 in the list | 43 of 5465 in the genome | 1 | CCG027257.1,CCG026698.1,CCG020634.1,CCG007283.1,CCG011813.1,CCG023756.1,CCG027692.1,CCG015800.2,CCG015087.1,CCG015568.1,CCG000010.1,CCG021800.1,CCG013126.2 |

|            |                                |                         |                           |   |                                                                                                                                                                                                                                                                                                                                                                                                                                                                                                                                                                                                                                                                                                                                                                                                                                                                                                                                                                                                                                                                                                                                                                                                                                                                                                                                                                                                                                                                                                                                                                                 |
|------------|--------------------------------|-------------------------|---------------------------|---|---------------------------------------------------------------------------------------------------------------------------------------------------------------------------------------------------------------------------------------------------------------------------------------------------------------------------------------------------------------------------------------------------------------------------------------------------------------------------------------------------------------------------------------------------------------------------------------------------------------------------------------------------------------------------------------------------------------------------------------------------------------------------------------------------------------------------------------------------------------------------------------------------------------------------------------------------------------------------------------------------------------------------------------------------------------------------------------------------------------------------------------------------------------------------------------------------------------------------------------------------------------------------------------------------------------------------------------------------------------------------------------------------------------------------------------------------------------------------------------------------------------------------------------------------------------------------------|
| GO:0043228 | non-membrane-bounded organelle | 264 of 3038 in the list | 547 of 5465 in the genome | 1 | CCG014531.2,CCG028253.1,CCG004973.1,CCG013430.1,CCG011675.1,CCG010647.1,CCG005370.1,CCG002354.1,CCG026473.1,CCG001167.1,CCG003587.1,CCG003573.1,CCG025223.1,CCG005194.1,CCG014836.1,CCG024177.1,CCG012514.1,CCG027196.1,CCG016370.1,CCG027183.2,CCG026871.2,CCG000166.1,CCG015998.1,CCG023053.1,CCG021911.1,CCG010905.1,CCG008270.1,CCG011764.1,CCG010909.1,CCG005737.1,CCG028653.1,CCG009249.1,CCG014896.1,CCG017580.1,CCG009980.1,CCG001863.1,CCG010649.1,CCG020987.1,CCG020010.1,CCG003438.1,CCG018788.1,CCG025396.1,CCG012083.1,CCG019029.1,CCG006344.1,CCG008559.1,CCG027696.1,CCG026280.1,CCG004101.1,CCG021737.1,CCG000773.1,CCG009543.1,CCG004494.1,CCG003104.1,CCG021228.1,CCG022673.1,CCG026159.1,CCG016399.1,CCG002852.1,CCG002966.1,CCG012584.1,CCG021895.1,CCG027748.1,CCG024788.1,CCG016778.1,CCG007336.1,CCG003707.1,CCG010136.1,CCG003310.1,CCG003471.1,CCG004459.2,CCG013617.1,CCG010112.1,CCG004084.1,CCG019398.1,CCG006876.1,CCG006479.1,CCG010137.1,CCG009461.1,CCG023963.3,CCG006421.1,CCG007985.1,CCG014772.1,CCG015426.1,CCG019426.1,CCG000535.1,CCG009394.1,CCG002644.1,CCG024813.1,CCG015167.1,CCG024421.3,CCG006336.1,CCG005443.1,CCG026688.1,CCG021496.1,CCG010906.1,CCG024769.1,CCG010138.1,CCG010418.1,CCG024834.3,CCG005442.1,CCG015908.2,CCG000603.1,CCG013833.1,CCG020899.1,CCG007767.1,CCG012229.1,CCG016119.1,CCG002947.1,CCG025107.1,CCG021933.1,CCG015312.2,CCG027197.1,CCG025409.1,CCG019518.1,CCG010646.1,CCG028222.1,CCG023696.1,CCG009528.1,CCG027695.1,CCG026558.1,CCG002137.1,CCG028236.1,CCG018918.1,CCG011957.1,CCG006420.1,CCG0130 |
|------------|--------------------------------|-------------------------|---------------------------|---|---------------------------------------------------------------------------------------------------------------------------------------------------------------------------------------------------------------------------------------------------------------------------------------------------------------------------------------------------------------------------------------------------------------------------------------------------------------------------------------------------------------------------------------------------------------------------------------------------------------------------------------------------------------------------------------------------------------------------------------------------------------------------------------------------------------------------------------------------------------------------------------------------------------------------------------------------------------------------------------------------------------------------------------------------------------------------------------------------------------------------------------------------------------------------------------------------------------------------------------------------------------------------------------------------------------------------------------------------------------------------------------------------------------------------------------------------------------------------------------------------------------------------------------------------------------------------------|

|            |                                              |                         |                           |   |                                                                                                                                                                                                                                                                                                                                                                                                                                                                                                                                                                                                                                                                                                                                                                                                                                                                                                                                                                                                                                                                                                                                                                                                                                                                                                                                                                                                                                                                                                                                                                                 |
|------------|----------------------------------------------|-------------------------|---------------------------|---|---------------------------------------------------------------------------------------------------------------------------------------------------------------------------------------------------------------------------------------------------------------------------------------------------------------------------------------------------------------------------------------------------------------------------------------------------------------------------------------------------------------------------------------------------------------------------------------------------------------------------------------------------------------------------------------------------------------------------------------------------------------------------------------------------------------------------------------------------------------------------------------------------------------------------------------------------------------------------------------------------------------------------------------------------------------------------------------------------------------------------------------------------------------------------------------------------------------------------------------------------------------------------------------------------------------------------------------------------------------------------------------------------------------------------------------------------------------------------------------------------------------------------------------------------------------------------------|
| GO:0043232 | intracellular non-membrane-bounded organelle | 264 of 3038 in the list | 547 of 5465 in the genome | 1 | CCG014531.2,CCG028253.1,CCG004973.1,CCG013430.1,CCG011675.1,CCG010647.1,CCG005370.1,CCG002354.1,CCG026473.1,CCG001167.1,CCG003587.1,CCG003573.1,CCG025223.1,CCG005194.1,CCG014836.1,CCG024177.1,CCG012514.1,CCG027196.1,CCG016370.1,CCG027183.2,CCG026871.2,CCG000166.1,CCG015998.1,CCG023053.1,CCG021911.1,CCG010905.1,CCG008270.1,CCG011764.1,CCG010909.1,CCG005737.1,CCG028653.1,CCG009249.1,CCG014896.1,CCG017580.1,CCG009980.1,CCG001863.1,CCG010649.1,CCG020987.1,CCG020010.1,CCG003438.1,CCG018788.1,CCG025396.1,CCG012083.1,CCG019029.1,CCG006344.1,CCG008559.1,CCG027696.1,CCG026280.1,CCG004101.1,CCG021737.1,CCG000773.1,CCG009543.1,CCG004494.1,CCG003104.1,CCG021228.1,CCG022673.1,CCG026159.1,CCG016399.1,CCG002852.1,CCG002966.1,CCG012584.1,CCG021895.1,CCG027748.1,CCG024788.1,CCG016778.1,CCG007336.1,CCG003707.1,CCG010136.1,CCG003310.1,CCG003471.1,CCG004459.2,CCG013617.1,CCG010112.1,CCG004084.1,CCG019398.1,CCG006876.1,CCG006479.1,CCG010137.1,CCG009461.1,CCG023963.3,CCG006421.1,CCG007985.1,CCG014772.1,CCG015426.1,CCG019426.1,CCG000535.1,CCG009394.1,CCG002644.1,CCG024813.1,CCG015167.1,CCG024421.3,CCG006336.1,CCG005443.1,CCG026688.1,CCG021496.1,CCG010906.1,CCG024769.1,CCG010138.1,CCG010418.1,CCG024834.3,CCG005442.1,CCG015908.2,CCG000603.1,CCG013833.1,CCG020899.1,CCG007767.1,CCG012229.1,CCG016119.1,CCG002947.1,CCG025107.1,CCG021933.1,CCG015312.2,CCG027197.1,CCG025409.1,CCG019518.1,CCG010646.1,CCG028222.1,CCG023696.1,CCG009528.1,CCG027695.1,CCG026558.1,CCG002137.1,CCG028236.1,CCG018918.1,CCG011957.1,CCG006420.1,CCG0130 |
|------------|----------------------------------------------|-------------------------|---------------------------|---|---------------------------------------------------------------------------------------------------------------------------------------------------------------------------------------------------------------------------------------------------------------------------------------------------------------------------------------------------------------------------------------------------------------------------------------------------------------------------------------------------------------------------------------------------------------------------------------------------------------------------------------------------------------------------------------------------------------------------------------------------------------------------------------------------------------------------------------------------------------------------------------------------------------------------------------------------------------------------------------------------------------------------------------------------------------------------------------------------------------------------------------------------------------------------------------------------------------------------------------------------------------------------------------------------------------------------------------------------------------------------------------------------------------------------------------------------------------------------------------------------------------------------------------------------------------------------------|

|            |                                           |                         |                           |   |                                                                                                                                                                                                                                                                                                                                                                                                                                                                                                                                                                                                                                                                                                                                                                                                                                                                                                                                                                                                                                                                                                                                                                                                                                                                                                                                                                                                                                                                                                                                                                                 |
|------------|-------------------------------------------|-------------------------|---------------------------|---|---------------------------------------------------------------------------------------------------------------------------------------------------------------------------------------------------------------------------------------------------------------------------------------------------------------------------------------------------------------------------------------------------------------------------------------------------------------------------------------------------------------------------------------------------------------------------------------------------------------------------------------------------------------------------------------------------------------------------------------------------------------------------------------------------------------------------------------------------------------------------------------------------------------------------------------------------------------------------------------------------------------------------------------------------------------------------------------------------------------------------------------------------------------------------------------------------------------------------------------------------------------------------------------------------------------------------------------------------------------------------------------------------------------------------------------------------------------------------------------------------------------------------------------------------------------------------------|
| GO:0005737 | cytoplasm                                 | 399 of 3038 in the list | 804 of 5465 in the genome | 1 | CCG014531.2,CCG011932.1,CCG020245.1,CCG018536.1,CCG023277.1,CCG014396.1,CCG010159.1,CCG024806.1,CCG010191.3,CCG013430.1,CCG005079.1,CCG021449.1,CCG009878.1,CCG000585.1,CCG000205.1,CCG004595.1,CCG025108.1,CCG020879.1,CCG021053.1,CCG002354.1,CCG016238.1,CCG004091.1,CCG006391.1,CCG017614.1,CCG019217.1,CCG003573.1,CCG021064.1,CCG028505.1,CCG025223.1,CCG009900.1,CCG014519.1,CCG017078.1,CCG011696.1,CCG014307.1,CCG026871.2,CCG007771.1,CCG005444.1,CCG024779.1,CCG024032.1,CCG003767.1,CCG008323.1,CCG008270.1,CCG019210.1,CCG006714.1,CCG011862.1,CCG003063.1,CCG002930.1,CCG005737.1,CCG023795.2,CCG008896.1,CCG020877.1,CCG009249.1,CCG006231.1,CCG014896.1,CCG001863.1,CCG016493.2,CCG005191.1,CCG013131.1,CCG008871.1,CCG012534.1,CCG002711.1,CCG018788.1,CCG006344.1,CCG024119.1,CCG008510.1,CCG026280.1,CCG021378.1,CCG021737.1,CCG000773.1,CCG014304.1,CCG016565.1,CCG014461.1,CCG011510.1,CCG022214.1,CCG027565.1,CCG016399.1,CCG009582.1,CCG011097.1,CCG000552.1,CCG002966.1,CCG019545.1,CCG020634.1,CCG019330.1,CCG001876.1,CCG000915.1,CCG014228.2,CCG000834.1,CCG027748.1,CCG002937.1,CCG000294.1,CCG008388.1,CCG000789.1,CCG016778.1,CCG005588.1,CCG010912.1,CCG028409.1,CCG015367.1,CCG027692.1,CCG000210.1,CCG002783.1,CCG004806.1,CCG000591.1,CCG027472.1,CCG027023.1,CCG003471.1,CCG022802.1,CCG010112.1,CCG004986.1,CCG019398.1,CCG022464.1,CCG011135.1,CCG006876.1,CCG020231.1,CCG015568.1,CCG017077.1,CCG024232.1,CCG001395.1,CCG004155.2,CCG022209.1,CCG007985.1,CCG022690.1,CCG027316.1,CCG000148.1,CCG002790.1,CCG017344.1,CCG019426.1,CCG0093 |
| GO:0033176 | proton-transporting V-type ATPase complex | 3 of 3038 in the list   | 20 of 5465 in the genome  | 1 | CCG010696.1,CCG000585.1,CCG012534.1                                                                                                                                                                                                                                                                                                                                                                                                                                                                                                                                                                                                                                                                                                                                                                                                                                                                                                                                                                                                                                                                                                                                                                                                                                                                                                                                                                                                                                                                                                                                             |
| GO:0030288 | outer membrane-bounded periplasmic        | 3 of 3038 in the list   | 22 of 5465 in the genome  | 1 | CCG004844.1,CCG001584.1,CCG021686.1                                                                                                                                                                                                                                                                                                                                                                                                                                                                                                                                                                                                                                                                                                                                                                                                                                                                                                                                                                                                                                                                                                                                                                                                                                                                                                                                                                                                                                                                                                                                             |
| GO:0030312 | external encapsulating                    | 3 of 3038 in the list   | 22 of 5465 in the genome  | 1 | CCG004844.1,CCG001584.1,CCG021686.1                                                                                                                                                                                                                                                                                                                                                                                                                                                                                                                                                                                                                                                                                                                                                                                                                                                                                                                                                                                                                                                                                                                                                                                                                                                                                                                                                                                                                                                                                                                                             |
| GO:0030313 | cell envelope                             | 3 of 3038 in the list   | 22 of 5465 in the genome  | 1 | CCG004844.1,CCG001584.1,CCG021686.1                                                                                                                                                                                                                                                                                                                                                                                                                                                                                                                                                                                                                                                                                                                                                                                                                                                                                                                                                                                                                                                                                                                                                                                                                                                                                                                                                                                                                                                                                                                                             |

|            |                           |                         |                           |   |                                                                                                                                                                                                                                                                                                                                                                                                                                                                                                                                                                                                                                                                                                                                                                                                                                                                                                                                                                                                                                                                                                                                                                                                                                                                                                                                                                                                             |
|------------|---------------------------|-------------------------|---------------------------|---|-------------------------------------------------------------------------------------------------------------------------------------------------------------------------------------------------------------------------------------------------------------------------------------------------------------------------------------------------------------------------------------------------------------------------------------------------------------------------------------------------------------------------------------------------------------------------------------------------------------------------------------------------------------------------------------------------------------------------------------------------------------------------------------------------------------------------------------------------------------------------------------------------------------------------------------------------------------------------------------------------------------------------------------------------------------------------------------------------------------------------------------------------------------------------------------------------------------------------------------------------------------------------------------------------------------------------------------------------------------------------------------------------------------|
| GO:0042597 | periplasmic space         | 3 of 3038 in the list   | 22 of 5465 in the genome  | 1 | CCG004844.1,CCG001584.1,CCG021686.1                                                                                                                                                                                                                                                                                                                                                                                                                                                                                                                                                                                                                                                                                                                                                                                                                                                                                                                                                                                                                                                                                                                                                                                                                                                                                                                                                                         |
| GO:0044462 | external encapsulating    | 3 of 3038 in the list   | 22 of 5465 in the genome  | 1 | CCG004844.1,CCG001584.1,CCG021686.1                                                                                                                                                                                                                                                                                                                                                                                                                                                                                                                                                                                                                                                                                                                                                                                                                                                                                                                                                                                                                                                                                                                                                                                                                                                                                                                                                                         |
| GO:0030529 | ribonucleoprotein complex | 113 of 3038 in the list | 266 of 5465 in the genome | 1 | CCG023263.1,CCG014531.2,CCG016778.1,CCG004955.1,CCG008569.1,CCG027579.1,CCG027724.1,CCG013430.1,CCG007256.1,CCG006357.1,CCG024857.1,CCG003437.1,CCG004104.1,CCG004909.1,CCG003471.1,CCG016139.1,CCG026048.1,CCG002354.1,CCG010112.1,CCG005176.1,CCG007636.1,CCG019398.1,CCG006876.1,CCG007396.1,CCG016378.1,CCG003573.1,CCG025223.1,CCG008858.1,CCG024781.1,CCG007854.1,CCG000614.1,CCG008753.1,CCG003809.1,CCG009349.1,CCG011345.1,CCG028285.1,CCG018636.1,CCG002792.1,CCG019944.1,CCG008581.1,CCG019426.1,CCG026871.2,CCG027635.1,CCG009394.1,CCG002544.1,CCG002644.1,CCG024813.1,CCG008270.1,CCG006714.1,CCG013802.1,CCG005737.1,CCG028653.1,CCG002680.1,CCG006336.1,CCG022629.1,CCG005443.1,CCG014051.1,CCG011972.1,CCG013870.1,CCG009249.1,CCG014896.1,CCG026840.1,CCG002735.1,CCG001863.1,CCG007962.1,CCG000754.1,CCG004008.1,CCG002890.1,CCG018217.1,CCG021917.1,CCG022229.1,CCG007059.1,CCG005442.1,CCG003710.1,CCG018788.1,CCG009214.1,CCG006344.1,CCG013833.1,CCG027913.1,CCG020899.1,CCG026280.1,CCG002408.1,CCG016285.1,CCG023686.1,CCG024810.1,CCG020268.1,CCG017334.1,CCG002238.1,CCG021737.1,CCG000773.1,CCG025107.1,CCG021933.1,CCG006475.1,CCG025409.1,CCG019518.1,CCG016399.1,CCG023511.1,CCG018126.1,CCG004927.1,CCG020806.1,CCG002966.1,CCG018320.1,CCG013306.1,CCG018402.1,CCG013234.1,CCG010024.1,CCG001013.1,CCG011256.1,CCG027748.1,CCG020963.1,CCG002564.1,CCG018474.1,CCG007047.1 |

|            |                  |                         |                           |   |                                                                                                                                                                                                                                                                                                                                                                                                                                                                                                                                                                                                                                                                                                                                                                                                                                                                                                                                                                                                                                                                                                                                                                                                                                                                                                                                                                                                                                                                                                                                                                                 |
|------------|------------------|-------------------------|---------------------------|---|---------------------------------------------------------------------------------------------------------------------------------------------------------------------------------------------------------------------------------------------------------------------------------------------------------------------------------------------------------------------------------------------------------------------------------------------------------------------------------------------------------------------------------------------------------------------------------------------------------------------------------------------------------------------------------------------------------------------------------------------------------------------------------------------------------------------------------------------------------------------------------------------------------------------------------------------------------------------------------------------------------------------------------------------------------------------------------------------------------------------------------------------------------------------------------------------------------------------------------------------------------------------------------------------------------------------------------------------------------------------------------------------------------------------------------------------------------------------------------------------------------------------------------------------------------------------------------|
| GO:0044444 | cytoplasmic part | 252 of 3038 in the list | 558 of 5465 in the genome | 1 | CCG022047.1,CCG014531.2,CCG018832.1,CCG011932.1,CCG013032.1,CCG020245.1,CCG018536.1,CCG010159.1,CCG013430.1,CCG000663.1,CCG000585.1,CCG000205.1,CCG003437.1,CCG020949.1,CCG004909.1,CCG017528.1,CCG026048.1,CCG020879.1,CCG021053.1,CCG002354.1,CCG007330.1,CCG004091.1,CCG006391.1,CCG007396.1,CCG009685.1,CCG017614.1,CCG022453.1,CCG015843.1,CCG019217.1,CCG016378.1,CCG003573.1,CCG028505.1,CCG025223.1,CCG007854.1,CCG007246.2,CCG000614.1,CCG008753.1,CCG002823.1,CCG018128.1,CCG009434.1,CCG025521.1,CCG000890.1,CCG019944.1,CCG026871.2,CCG010939.1,CCG028332.1,CCG027412.1,CCG014171.1,CCG008323.1,CCG008270.1,CCG019210.1,CCG006714.1,CCG011862.1,CCG025277.1,CCG008592.1,CCG026514.1,CCG019558.1,CCG002930.1,CCG005737.1,CCG016673.1,CCG011972.1,CCG008896.1,CCG009249.1,CCG003215.3,CCG014896.1,CCG027415.1,CCG013390.1,CCG009082.1,CCG001863.1,CCG016493.2,CCG005191.1,CCG013509.1,CCG013131.1,CCG002890.1,CCG025309.1,CCG022229.1,CCG008871.1,CCG012534.1,CCG010417.2,CCG007059.1,CCG018788.1,CCG023114.1,CCG006344.1,CCG019082.1,CCG024119.1,CCG027913.1,CCG026280.1,CCG016285.1,CCG026240.1,CCG021737.1,CCG000773.1,CCG014304.1,CCG025233.1,CCG006077.1,CCG015410.1,CCG009142.1,CCG019560.1,CCG017197.1,CCG011510.1,CCG022214.1,CCG016399.1,CCG000552.1,CCG020806.1,CCG002966.1,CCG019712.1,CCG020634.1,CCG014228.2,CCG023756.1,CCG001013.1,CCG017125.1,CCG011256.1,CCG027748.1,CCG002937.1,CCG007047.1,CCG000294.1,CCG026698.1,CCG000789.1,CCG016778.1,CCG019892.1,CCG021819.1,CCG008569.1,CCG028409.1,CCG023617.1,CCG027724.1,CCG007256.1,CCG019590.1,CCG0110 |
|------------|------------------|-------------------------|---------------------------|---|---------------------------------------------------------------------------------------------------------------------------------------------------------------------------------------------------------------------------------------------------------------------------------------------------------------------------------------------------------------------------------------------------------------------------------------------------------------------------------------------------------------------------------------------------------------------------------------------------------------------------------------------------------------------------------------------------------------------------------------------------------------------------------------------------------------------------------------------------------------------------------------------------------------------------------------------------------------------------------------------------------------------------------------------------------------------------------------------------------------------------------------------------------------------------------------------------------------------------------------------------------------------------------------------------------------------------------------------------------------------------------------------------------------------------------------------------------------------------------------------------------------------------------------------------------------------------------|



|            |          |                        |                           |   |                                                                                                                                                                                                                                                                                                                                                                                                                                                                                                                                                                                                                                                                                                                                                                                                                                                                                                                                                                                     |
|------------|----------|------------------------|---------------------------|---|-------------------------------------------------------------------------------------------------------------------------------------------------------------------------------------------------------------------------------------------------------------------------------------------------------------------------------------------------------------------------------------------------------------------------------------------------------------------------------------------------------------------------------------------------------------------------------------------------------------------------------------------------------------------------------------------------------------------------------------------------------------------------------------------------------------------------------------------------------------------------------------------------------------------------------------------------------------------------------------|
| GO:0005840 | ribosome | 79 of 3038 in the list | 225 of 5465 in the genome | 1 | CCG014531.2,CCG016778.1,CCG008569.1,CCG027724.1,CCG013430.1,CCG007256.1,CCG003437.1,CCG004104.1,CCG004909.1,CCG003471.1,CCG016139.1,CCG026048.1,CCG002354.1,CCG010112.1,CCG019398.1,CCG006876.1,CCG007396.1,CCG003573.1,CCG016378.1,CCG025223.1,CCG024781.1,CCG007854.1,CCG008753.1,CCG003809.1,CCG009349.1,CCG011345.1,CCG019944.1,CCG008581.1,CCG019426.1,CCG026871.2,CCG009394.1,CCG002544.1,CCG002644.1,CCG024813.1,CCG008270.1,CCG005737.1,CCG002680.1,CCG006336.1,CCG005443.1,CCG011972.1,CCG013870.1,CCG014051.1,CCG009249.1,CCG014896.1,CCG001863.1,CCG002890.1,CCG021917.1,CCG022229.1,CCG005442.1,CCG007059.1,CCG003710.1,CCG018788.1,CCG006344.1,CCG013833.1,CCG027913.1,CCG020899.1,CCG026280.1,CCG016285.1,CCG002408.1,CCG020268.1,CCG017334.1,CCG002238.1,CCG021737.1,CCG000773.1,CCG025107.1,CCG021933.1,CCG025409.1,CCG006475.1,CCG019518.1,CCG016399.1,CCG018126.1,CCG002966.1,CCG013306.1,CCG013234.1,CCG011256.1,CCG001013.1,CCG027748.1,CCG020963.1,CCG007047.1 |
|------------|----------|------------------------|---------------------------|---|-------------------------------------------------------------------------------------------------------------------------------------------------------------------------------------------------------------------------------------------------------------------------------------------------------------------------------------------------------------------------------------------------------------------------------------------------------------------------------------------------------------------------------------------------------------------------------------------------------------------------------------------------------------------------------------------------------------------------------------------------------------------------------------------------------------------------------------------------------------------------------------------------------------------------------------------------------------------------------------|

|            |                                 |                         |                            |   |                                                                                                                                                                                                                                                                                                                                                                                                                                                                                                                                                                                                                                                                                                                                                                                                                                                                                                                                                                                                                                                                                                                                                                                                                                                                                                                                                                                                                                                                                                                                                                                 |
|------------|---------------------------------|-------------------------|----------------------------|---|---------------------------------------------------------------------------------------------------------------------------------------------------------------------------------------------------------------------------------------------------------------------------------------------------------------------------------------------------------------------------------------------------------------------------------------------------------------------------------------------------------------------------------------------------------------------------------------------------------------------------------------------------------------------------------------------------------------------------------------------------------------------------------------------------------------------------------------------------------------------------------------------------------------------------------------------------------------------------------------------------------------------------------------------------------------------------------------------------------------------------------------------------------------------------------------------------------------------------------------------------------------------------------------------------------------------------------------------------------------------------------------------------------------------------------------------------------------------------------------------------------------------------------------------------------------------------------|
| GO:0031224 | intrinsic component of membrane | 463 of 3038 in the list | 1012 of 5465 in the genome | 1 | CCG012989.1,CCG023099.1,CCG001809.1,CCG014291.1,CCG001468.1,CCG024517.1,CCG013009.1,CCG019285.1,CCG003878.1,CCG020785.1,CCG022794.1,CCG002389.1,CCG007941.1,CCG017210.1,CCG014382.1,CCG003175.1,CCG016326.1,CCG010317.1,CCG019217.1,CCG002841.1,CCG023583.1,CCG001379.1,CCG005140.1,CCG023276.2,CCG012061.1,CCG026799.1,CCG025274.1,CCG022830.1,CCG009530.1,CCG003934.1,CCG017240.1,CCG018883.1,CCG012307.1,CCG000526.1,CCG027669.1,CCG019907.1,CCG015967.1,CCG018416.1,CCG019210.1,CCG010071.1,CCG027899.1,CCG003415.1,CCG016754.1,CCG002930.1,CCG001517.1,CCG019655.1,CCG000078.1,CCG009668.1,CCG010710.1,CCG024414.1,CCG005330.1,CCG009822.1,CCG007743.1,CCG026744.1,CCG004279.1,CCG013131.1,CCG016269.1,CCG003483.1,CCG024663.1,CCG011830.1,CCG022676.1,CCG014793.1,CCG015245.1,CCG016254.1,CCG016267.1,CCG027101.1,CCG003004.1,CCG021378.1,CCG018264.1,CCG015571.1,CCG008236.1,CCG005391.2,CCG018263.1,CCG007951.1,CCG004451.1,CCG016756.1,CCG019647.1,CCG015530.1,CCG026151.1,CCG022587.1,CCG000552.1,CCG012556.1,CCG023127.1,CCG026422.2,CCG016719.1,CCG013635.1,CCG018349.1,CCG028396.1,CCG000983.1,CCG010416.1,CCG017141.1,CCG027398.1,CCG024664.1,CCG022488.2,CCG016753.1,CCG011829.1,CCG024662.1,CCG026047.1,CCG023060.1,CCG008709.1,CCG011252.1,CCG020032.1,CCG000210.1,CCG004249.1,CCG009803.1,CCG017083.1,CCG004806.1,CCG017061.1,CCG006280.1,CCG027023.1,CCG015458.1,CCG020491.1,CCG014345.2,CCG005239.1,CCG021795.1,CCG025928.1,CCG016266.1,CCG019881.1,CCG025035.1,CCG011315.1,CCG022209.1,CCG000984.1,CCG022137.1,CCG012195.1,CCG008075.1,CCG017863.3,CCG0163 |
|------------|---------------------------------|-------------------------|----------------------------|---|---------------------------------------------------------------------------------------------------------------------------------------------------------------------------------------------------------------------------------------------------------------------------------------------------------------------------------------------------------------------------------------------------------------------------------------------------------------------------------------------------------------------------------------------------------------------------------------------------------------------------------------------------------------------------------------------------------------------------------------------------------------------------------------------------------------------------------------------------------------------------------------------------------------------------------------------------------------------------------------------------------------------------------------------------------------------------------------------------------------------------------------------------------------------------------------------------------------------------------------------------------------------------------------------------------------------------------------------------------------------------------------------------------------------------------------------------------------------------------------------------------------------------------------------------------------------------------|

|            |                                |                         |                           |   |                                                                                                                                                                                                                                                                                                                                                                                                                                                                                                                                                                                                                                                                                                                                                                                                                                                                                                                                                                                                                                                                                                                                                                                                                                                                                                                                                                                                                                                                                                                                                                                 |
|------------|--------------------------------|-------------------------|---------------------------|---|---------------------------------------------------------------------------------------------------------------------------------------------------------------------------------------------------------------------------------------------------------------------------------------------------------------------------------------------------------------------------------------------------------------------------------------------------------------------------------------------------------------------------------------------------------------------------------------------------------------------------------------------------------------------------------------------------------------------------------------------------------------------------------------------------------------------------------------------------------------------------------------------------------------------------------------------------------------------------------------------------------------------------------------------------------------------------------------------------------------------------------------------------------------------------------------------------------------------------------------------------------------------------------------------------------------------------------------------------------------------------------------------------------------------------------------------------------------------------------------------------------------------------------------------------------------------------------|
| GO:0016021 | integral component of membrane | 452 of 3038 in the list | 989 of 5465 in the genome | 1 | CCG012989.1,CCG023099.1,CCG001809.1,CCG014291.1,CCG001468.1,CCG024517.1,CCG013009.1,CCG019285.1,CCG003878.1,CCG020785.1,CCG022794.1,CCG002389.1,CCG007941.1,CCG017210.1,CCG014382.1,CCG003175.1,CCG016326.1,CCG010317.1,CCG019217.1,CCG002841.1,CCG023583.1,CCG001379.1,CCG005140.1,CCG023276.2,CCG012061.1,CCG026799.1,CCG025274.1,CCG022830.1,CCG009530.1,CCG003934.1,CCG017240.1,CCG018883.1,CCG012307.1,CCG000526.1,CCG019907.1,CCG018416.1,CCG019210.1,CCG010071.1,CCG027899.1,CCG003415.1,CCG016754.1,CCG001517.1,CCG019655.1,CCG000078.1,CCG009668.1,CCG010710.1,CCG024414.1,CCG005330.1,CCG009822.1,CCG007743.1,CCG026744.1,CCG004279.1,CCG013131.1,CCG016269.1,CCG003483.1,CCG024663.1,CCG011830.1,CCG022676.1,CCG014793.1,CCG015245.1,CCG016254.1,CCG016267.1,CCG027101.1,CCG003004.1,CCG021378.1,CCG018264.1,CCG015571.1,CCG008236.1,CCG005391.2,CCG018263.1,CCG007951.1,CCG004451.1,CCG016756.1,CCG019647.1,CCG015530.1,CCG026151.1,CCG022587.1,CCG012556.1,CCG023127.1,CCG026422.2,CCG016719.1,CCG013635.1,CCG018349.1,CCG028396.1,CCG000983.1,CCG010416.1,CCG017141.1,CCG027398.1,CCG024664.1,CCG022488.2,CCG016753.1,CCG011829.1,CCG024662.1,CCG026047.1,CCG023060.1,CCG008709.1,CCG011252.1,CCG020032.1,CCG000210.1,CCG004249.1,CCG009803.1,CCG017083.1,CCG004806.1,CCG017061.1,CCG006280.1,CCG027023.1,CCG015458.1,CCG020491.1,CCG014345.2,CCG005239.1,CCG021795.1,CCG025928.1,CCG016266.1,CCG019881.1,CCG025035.1,CCG011315.1,CCG000984.1,CCG022137.1,CCG012195.1,CCG008075.1,CCG017863.3,CCG016306.1,CCG011827.1,CCG009811.1,CCG004125.1,CCG018271.1,CCG0106 |
|------------|--------------------------------|-------------------------|---------------------------|---|---------------------------------------------------------------------------------------------------------------------------------------------------------------------------------------------------------------------------------------------------------------------------------------------------------------------------------------------------------------------------------------------------------------------------------------------------------------------------------------------------------------------------------------------------------------------------------------------------------------------------------------------------------------------------------------------------------------------------------------------------------------------------------------------------------------------------------------------------------------------------------------------------------------------------------------------------------------------------------------------------------------------------------------------------------------------------------------------------------------------------------------------------------------------------------------------------------------------------------------------------------------------------------------------------------------------------------------------------------------------------------------------------------------------------------------------------------------------------------------------------------------------------------------------------------------------------------|

|            |          |                         |                            |   |                                                                                                                                                                                                                                                                                                                                                                                                                                                                                                                                                                                                                                                                                                                                                                                                                                                                                                                                                                                                                                                                                                                                                                                                                                                                                                                                                                                                                                                                                                                                                                                 |
|------------|----------|-------------------------|----------------------------|---|---------------------------------------------------------------------------------------------------------------------------------------------------------------------------------------------------------------------------------------------------------------------------------------------------------------------------------------------------------------------------------------------------------------------------------------------------------------------------------------------------------------------------------------------------------------------------------------------------------------------------------------------------------------------------------------------------------------------------------------------------------------------------------------------------------------------------------------------------------------------------------------------------------------------------------------------------------------------------------------------------------------------------------------------------------------------------------------------------------------------------------------------------------------------------------------------------------------------------------------------------------------------------------------------------------------------------------------------------------------------------------------------------------------------------------------------------------------------------------------------------------------------------------------------------------------------------------|
| GO:0016020 | membrane | 901 of 3038 in the list | 2043 of 5465 in the genome | 1 | CCG016021.1,CCG005307.1,CCG017420.1,CCG011932.1,CCG020245.1,CCG024345.1,CCG010623.2,CCG003545.1,CCG021740.1,CCG004086.1,CCG021738.1,CCG000585.1,CCG001057.1,CCG014291.1,CCG001468.1,CCG024517.1,CCG013009.1,CCG019285.1,CCG009428.1,CCG020785.1,CCG019768.1,CCG022794.1,CCG020013.1,CCG000411.1,CCG013708.1,CCG002841.1,CCG023583.1,CCG025472.1,CCG003712.1,CCG026799.1,CCG001219.2,CCG013130.1,CCG022830.1,CCG017851.1,CCG009530.1,CCG000554.1,CCG017240.1,CCG011200.2,CCG009407.1,CCG005053.1,CCG011237.1,CCG019190.1,CCG000526.1,CCG018661.1,CCG027669.1,CCG016654.1,CCG015967.1,CCG018416.1,CCG014240.1,CCG003415.1,CCG026050.1,CCG001964.1,CCG002930.1,CCG001517.1,CCG003624.1,CCG019655.1,CCG024365.1,CCG009668.1,CCG009822.1,CCG005191.1,CCG004279.1,CCG003483.1,CCG024431.1,CCG024663.1,CCG006588.2,CCG022676.1,CCG014793.1,CCG015245.1,CCG018494.1,CCG024222.1,CCG026953.1,CCG024119.1,CCG003004.1,CCG019678.1,CCG018264.1,CCG021854.1,CCG013641.1,CCG017477.1,CCG008236.1,CCG003495.1,CCG005391.2,CCG022168.1,CCG007951.1,CCG007597.1,CCG016756.1,CCG019647.1,CCG015530.1,CCG026151.1,CCG022587.1,CCG025131.2,CCG000552.1,CCG020634.1,CCG008444.1,CCG027182.1,CCG012023.1,CCG026422.2,CCG016719.1,CCG018349.1,CCG028396.1,CCG000983.1,CCG010416.1,CCG024664.1,CCG001285.1,CCG017381.1,CCG016753.1,CCG024662.1,CCG016263.1,CCG026047.1,CCG011252.1,CCG027692.1,CCG017947.1,CCG007356.1,CCG004249.1,CCG007766.1,CCG003273.1,CCG009803.1,CCG017061.1,CCG006280.1,CCG027023.1,CCG016347.1,CCG022802.1,CCG010112.1,CCG015458.1,CCG027889.1,CCG014760.1,CCG020491.1,CCG0143 |
|------------|----------|-------------------------|----------------------------|---|---------------------------------------------------------------------------------------------------------------------------------------------------------------------------------------------------------------------------------------------------------------------------------------------------------------------------------------------------------------------------------------------------------------------------------------------------------------------------------------------------------------------------------------------------------------------------------------------------------------------------------------------------------------------------------------------------------------------------------------------------------------------------------------------------------------------------------------------------------------------------------------------------------------------------------------------------------------------------------------------------------------------------------------------------------------------------------------------------------------------------------------------------------------------------------------------------------------------------------------------------------------------------------------------------------------------------------------------------------------------------------------------------------------------------------------------------------------------------------------------------------------------------------------------------------------------------------|

|            |               |                         |                            |   |                                                                                                                                                                                                                                                                                                                                                                                                                                                                                                                                                                                                                                                                                                                                                                                                                                                                                                                                                                                                                                                                                                                                                                                                                                                                                                                                                                                                                                                                                                                                                                                 |
|------------|---------------|-------------------------|----------------------------|---|---------------------------------------------------------------------------------------------------------------------------------------------------------------------------------------------------------------------------------------------------------------------------------------------------------------------------------------------------------------------------------------------------------------------------------------------------------------------------------------------------------------------------------------------------------------------------------------------------------------------------------------------------------------------------------------------------------------------------------------------------------------------------------------------------------------------------------------------------------------------------------------------------------------------------------------------------------------------------------------------------------------------------------------------------------------------------------------------------------------------------------------------------------------------------------------------------------------------------------------------------------------------------------------------------------------------------------------------------------------------------------------------------------------------------------------------------------------------------------------------------------------------------------------------------------------------------------|
| GO:0044425 | membrane part | 519 of 3038 in the list | 1149 of 5465 in the genome | 1 | CCG011932.1,CCG000585.1,CCG014291.1,CCG001468.1,CCG024517.1,CCG013009.1,CCG019285.1,CCG020785.1,CCG022794.1,CCG002841.1,CCG023583.1,CCG026799.1,CCG022830.1,CCG009530.1,CCG017240.1,CCG000526.1,CCG027669.1,CCG015967.1,CCG018416.1,CCG003415.1,CCG002930.1,CCG001517.1,CCG019655.1,CCG009668.1,CCG009822.1,CCG004279.1,CCG003483.1,CCG024663.1,CCG022676.1,CCG014793.1,CCG015245.1,CCG003004.1,CCG019678.1,CCG018264.1,CCG008236.1,CCG005391.2,CCG007951.1,CCG016756.1,CCG019647.1,CCG015530.1,CCG026151.1,CCG022587.1,CCG000552.1,CCG020634.1,CCG026422.2,CCG016719.1,CCG018349.1,CCG028396.1,CCG000983.1,CCG010416.1,CCG024664.1,CCG001285.1,CCG016753.1,CCG024662.1,CCG026047.1,CCG011252.1,CCG027692.1,CCG004249.1,CCG009803.1,CCG017061.1,CCG006280.1,CCG027023.1,CCG010112.1,CCG015458.1,CCG020491.1,CCG014345.2,CCG005239.1,CCG021795.1,CCG025928.1,CCG016266.1,CCG011315.1,CCG022137.1,CCG012195.1,CCG008075.1,CCG011827.1,CCG015986.1,CCG019611.1,CCG010711.1,CCG000148.1,CCG025510.1,CCG023190.1,CCG009553.1,CCG026979.1,CCG024760.1,CCG027257.1,CCG004226.1,CCG023002.1,CCG023662.1,CCG017641.1,CCG023779.1,CCG017094.1,CCG016459.1,CCG003009.1,CCG025334.1,CCG017696.1,CCG026370.1,CCG015800.2,CCG002839.1,CCG022510.1,CCG009928.1,CCG018930.1,CCG027014.1,CCG010948.1,CCG007317.1,CCG016956.1,CCG001066.1,CCG011297.1,CCG007691.1,CCG007724.1,CCG017398.1,CCG027971.1,CCG005800.1,CCG025568.1,CCG003681.1,CCG007862.1,CCG017241.1,CCG009368.1,CCG021273.1,CCG016669.1,CCG024625.1,CCG010559.1,CCG009127.1,CCG021862.1,CCG018265.1,CCG012988.1,CCG003110.1,CCG0273 |
|------------|---------------|-------------------------|----------------------------|---|---------------------------------------------------------------------------------------------------------------------------------------------------------------------------------------------------------------------------------------------------------------------------------------------------------------------------------------------------------------------------------------------------------------------------------------------------------------------------------------------------------------------------------------------------------------------------------------------------------------------------------------------------------------------------------------------------------------------------------------------------------------------------------------------------------------------------------------------------------------------------------------------------------------------------------------------------------------------------------------------------------------------------------------------------------------------------------------------------------------------------------------------------------------------------------------------------------------------------------------------------------------------------------------------------------------------------------------------------------------------------------------------------------------------------------------------------------------------------------------------------------------------------------------------------------------------------------|

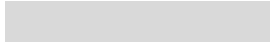

Supplement: pnas.1516410112.sd028.pdf [file pnas.1516410112.sd028.pdf]
