# Supplementary material
Source: PubMed Central journal article supplement (PMC4640774)

Table S7.8. Sex-bias genes of stable expression during development.

| GeneID          | Eembryo<br>1 | Eembryo<br>2 | Larvae1 | Larvae2 | Pupae   | Adult   | CV      | Gene_<br>length | M-RPKM    | F-RPKM     | log2<br>Ratio(F/M) | Up-<br>Down-<br>Regulat<br>ion(F/M<br>) | P-value | FDR   | Descriptio<br>n                                                            | Pathwa<br>y                                                                                                                                                 | GO<br>Componen<br>t                        | GO<br>Function                                                                                                                | GO Process                                            |
|-----------------|--------------|--------------|---------|---------|---------|---------|---------|-----------------|-----------|------------|--------------------|-----------------------------------------|---------|-------|----------------------------------------------------------------------------|-------------------------------------------------------------------------------------------------------------------------------------------------------------|--------------------------------------------|-------------------------------------------------------------------------------------------------------------------------------|-------------------------------------------------------|
| CCG027868<br>.1 | 15.4797      | 17.49676     | 11.8427 | 13.5838 | 13.4373 | 18.6199 | 0.17283 | 1290            | 12.091483 | 25.1482797 | 1.056468461        | Up                                      | 0       | 0     | AAEL00324<br>8-PA<br>OS=Aedes<br>aegypti<br>GN=AAELO<br>03248<br>PE=4 SV=1 | -                                                                                                                                                           | -                                          | -                                                                                                                             | -                                                     |
| CCG027392<br>.1 | 510.571      | 606.1046     | 634.122 | 473.069 | 553.867 | 436.542 | 0.14304 | 1728            | 589.93865 | 283.145857 | -1.059019503       | Down                                    | 0       | 0     | AAEL00283<br>3-PA<br>OS=Aedes<br>aegypti<br>GN=AAELO<br>02833<br>PE=3 SV=1 | ko04142<br>//Lysoso<br>me;ko0<br>4145//P<br>hagoso<br>me;ko0<br>4612//A<br>ntigen<br>processi<br>ng and<br>present<br>ation;ko<br>05323//<br>Rheuma<br>toid | -                                          | GO:000419<br>7//cysteine-<br>type<br>endopeptida<br>se<br>activity;GO:<br>0008234//cy<br>steine-type<br>peptidase<br>activity | GO:0006508<br>//proteolysis                           |
| CCG027327<br>.1 | 10.574       | 9.001408     | 7.8957  | 7.19572 | 6.11269 | 9.56833 | 0.19501 | 8084            | 3.3699668 | 15.7666845 | 2.22607302         | Up                                      | #####   | ##### | AAEL00521<br>5-PA<br>OS=Aedes<br>aegypti<br>GN=AAELO<br>05215<br>PE=4 SV=1 | -                                                                                                                                                           | -                                          | -                                                                                                                             | -                                                     |
| CCG027323<br>.1 | 14.0586      | 14.54251     | 10.6693 | 11.212  | 14.0046 | 18.2307 | 0.19676 | 2223            | 7.8091645 | 28.6522628 | 1.875408965        | Up                                      | #####   | ##### | AAEL00673<br>4-PA<br>OS=Aedes<br>aegypti<br>GN=AAELO<br>06734<br>PE=3 SV=1 | ko03060<br>//Protein<br>export                                                                                                                              | GO:001602<br>1//integral<br>to<br>membrane | -                                                                                                                             | GO:0051205<br>//protein<br>insertion into<br>membrane |

|                 |         |          |         |         |         |         |         |      |           |            |             |      |       |       |                                                                                                                         |                                                                               |                                            |                                                                                                                                                                     |                                      |
|-----------------|---------|----------|---------|---------|---------|---------|---------|------|-----------|------------|-------------|------|-------|-------|-------------------------------------------------------------------------------------------------------------------------|-------------------------------------------------------------------------------|--------------------------------------------|---------------------------------------------------------------------------------------------------------------------------------------------------------------------|--------------------------------------|
| CCG026987<br>.1 | 32.6826 | 31.92547 | 35.5349 | 28.5048 | 24.2537 | 35.5226 | 0.13914 | 2553 | 23.092235 | 47.9529515 | 1.054211806 | Up   | ##### | ##### | AAEL01035<br>9-PA<br>OS=Aedes<br>aegypti<br>GN=AAELO<br>10359<br>PE=3 SV=1                                              | -                                                                             | -                                          | GO:000016<br>6//nucleotid<br>e<br>binding;GO:<br>0005524//A<br>TP<br>binding;GO:<br>0016887//A<br>TPase<br>activity;GO:<br>0017111//nu<br>cleoside-<br>triphosphata | -                                    |
| CCG026883<br>.1 | 13.3114 | 13.70704 | 11.4863 | 16.8222 | 17.0573 | 18.0557 | 0.1723  | 2490 | 11.078944 | 25.0323725 | 1.175974704 | Up   | 0     | 0     | AAEL00615<br>5-PA<br>OS=Aedes<br>aegypti<br>GN=AAELO<br>06155<br>PE=4 SV=1                                              | -                                                                             | -                                          | -                                                                                                                                                                   | -                                    |
| CCG026744<br>.1 | 8.36948 | 7.011122 | 5.34301 | 7.6484  | 8.24345 | 7.39901 | 0.15021 | 816  | 4.0020831 | 10.7959384 | 1.431665614 | Up   | 0     | 0     | AAEL00009<br>0-PA<br>OS=Aedes<br>aegypti<br>GN=AAELO<br>00090<br>PE=4 SV=1                                              | -                                                                             | GO:001602<br>1//integral<br>to<br>membrane | -                                                                                                                                                                   | GO:0015031<br>//protein<br>transport |
| CCG026342<br>.2 | 63.4035 | 75.89128 | 60.6177 | 71.0767 | 86.625  | 75.7966 | 0.13096 | 3129 | 39.824938 | 111.768169 | 1.488765361 | Up   | 0     | 0     | Putative<br>uncharacter<br>ized protein<br>OS=Culex<br>quinquefasc<br>iatus<br>GN=CpipJ_<br>CPIJ00719<br>6 PE=3<br>SV=1 | ko04141<br>//Protein<br>processi<br>ng in<br>endopla<br>smic<br>reticulu<br>m | -                                          | GO:000552<br>4//ATP<br>binding                                                                                                                                      | -                                    |
| CCG025936<br>.1 | 16.4685 | 21.09986 | 24.1471 | 29.8391 | 23.6693 | 26.4344 | 0.19352 | 1625 | 35.48639  | 17.3823309 | -1.02964427 | Down | ##### | ##### | AAEL00618<br>6-PA<br>OS=Aedes<br>aegypti<br>GN=AAELO<br>06186<br>PE=4 SV=1                                              | -                                                                             | -                                          | -                                                                                                                                                                   | -                                    |

|                 |         |          |         |         |         |         |         |      |           |            |             |    |       |       |                                                                                                                 |                                                                                                                                   |                                                                |                                                                                                                                                                                                |                                                                              |
|-----------------|---------|----------|---------|---------|---------|---------|---------|------|-----------|------------|-------------|----|-------|-------|-----------------------------------------------------------------------------------------------------------------|-----------------------------------------------------------------------------------------------------------------------------------|----------------------------------------------------------------|------------------------------------------------------------------------------------------------------------------------------------------------------------------------------------------------|------------------------------------------------------------------------------|
| CCG024937<br>.1 | 7.93182 | 8.212841 | 9.10999 | 5.22466 | 6.32026 | 7.10955 | 0.1914  | 2190 | 3.7475887 | 10.4715203 | 1.48243638  | Up | ##### | ##### | AAEL00096<br>5-PA<br>OS=Aedes<br>aegypti<br>GN=AAELO<br>00965<br>PE=4 SV=1                                      | ko03013<br>//RNA<br>transport                                                                                                     | -                                                              | GO:000551<br>5//protein<br>binding                                                                                                                                                             | -                                                                            |
| CCG024781<br>.1 | 1714.46 | 2159.377 | 2382.3  | 2573.08 | 1565.74 | 1865.07 | 0.19293 | 985  | 1124.0185 | 2606.11292 | 1.213233865 | Up | ##### | ##### | 60S<br>ribosomal<br>protein L31<br>OS=Culex<br>quinquefasc<br>iatus<br>GN=CpipJ_<br>CPIJ01069<br>2 PE=3<br>SV=1 | ko03010<br>//Riboso<br>me                                                                                                         | GO:000562<br>2//intracellul<br>ar;GO:0005<br>840//riboso<br>me | GO:000373<br>5//structural<br>constituent<br>of ribosome                                                                                                                                       | GO:0006412<br>//translation                                                  |
| CCG024432<br>.2 | 12.9459 | 12.47256 | 12.7774 | 10.7621 | 11.023  | 15.7305 | 0.14101 | 2394 | 9.0462599 | 22.4147681 | 1.309056221 | Up | 0     | 0     | Uncharacter<br>ized protein<br>OS=Anophe<br>les darlingi<br>GN=AND_1<br>2429 PE=3<br>SV=1                       | ko01100<br>//Metab<br>olic<br>pathway<br>s;ko007<br>90//Fola<br>te<br>biosynth<br>esis;ko0<br>4122//S<br>ulfur<br>relay<br>system | GO:001900<br>8//molybdo<br>pterin<br>synthase<br>complex       | GO:000382<br>4//catalytic<br>activity;GO:<br>0046872//m<br>etal ion<br>binding;GO:<br>0051536//iro<br>n-sulfur<br>cluster<br>binding;GO:<br>0051539//4<br>iron, 4 sulfur<br>cluster<br>binding | GO:0006777<br>//Mo-<br>molybdopteri<br>n cofactor<br>biosynthetic<br>process |
| CCG024115<br>.1 | 142.057 | 108.471  | 88.0886 | 104.534 | 93.2229 | 89.2249 | 0.19447 | 1488 | 53.769923 | 124.679822 | 1.21335668  | Up | 0     | 0     | AAEL00363<br>4-PA<br>OS=Aedes<br>aegypti<br>GN=AAELO<br>03634<br>PE=2 SV=1                                      | -                                                                                                                                 | -                                                              | GO:000551<br>5//protein<br>binding                                                                                                                                                             | -                                                                            |
| CCG024084<br>.1 | 15.2345 | 12.47696 | 13.2749 | 9.65343 | 11.1553 | 11.3122 | 0.15916 | 402  | 4.2755955 | 18.3487473 | 2.101484298 | Up | ##### | ##### | AAEL00655<br>1-PA<br>OS=Aedes<br>aegypti<br>GN=AAELO<br>06551<br>PE=4 SV=1                                      | -                                                                                                                                 | -                                                              | -                                                                                                                                                                                              | -                                                                            |

|                 |         |          |         |         |         |         |         |      |           |            |             |    |        |        |                                                                                                                                |                                                                                                                                                                                                                         |                                                                                   |                                                                                                 |                                                                               |
|-----------------|---------|----------|---------|---------|---------|---------|---------|------|-----------|------------|-------------|----|--------|--------|--------------------------------------------------------------------------------------------------------------------------------|-------------------------------------------------------------------------------------------------------------------------------------------------------------------------------------------------------------------------|-----------------------------------------------------------------------------------|-------------------------------------------------------------------------------------------------|-------------------------------------------------------------------------------|
| CCG023989<br>.1 | 3.39417 | 3.005374 | 3.18954 | 3.95349 | 4.13388 | 2.37879 | 0.19241 | 678  | 1.4576754 | 3.29989633 | 1.178751248 | Up | 0.0005 | 0.0007 | AAEL01267<br>6-PA<br>OS=Aedes<br>aegypti<br>GN=AAELO<br>12676<br>PE=4 SV=1                                                     | -                                                                                                                                                                                                                       | GO:000562<br>2//intracellul<br>ar                                                 | GO:000367<br>6//nucleic<br>acid<br>binding;GO:<br>0008408//3'-<br>5'<br>exonuclease<br>activity | GO:0006139<br>//nucleobase<br>-containing<br>compound<br>metabolic<br>process |
| CCG023798<br>.1 | 12.1701 | 11.09828 | 10.9805 | 10.0235 | 6.48203 | 10.0827 | 0.19298 | 918  | 6.6467345 | 13.5187236 | 1.024241299 | Up | #####  | #####  | AAEL01504<br>1-PA<br>OS=Aedes<br>aegypti<br>GN=AAELO<br>15041<br>PE=3 SV=1                                                     | -                                                                                                                                                                                                                       | -                                                                                 | -                                                                                               | -                                                                             |
| CCG023581<br>.1 | 30.0896 | 40.7704  | 34.4289 | 37.8724 | 26.2354 | 36.1372 | 0.1549  | 1162 | 14.421856 | 57.8526388 | 2.004125937 | Up | #####  | #####  | Eukaryotic<br>translation<br>initiation<br>factor 3<br>subunit G<br>OS=Anophe<br>les darlingi<br>GN=AND_1<br>6989 PE=3<br>SV=1 | ko03013<br>//RNA<br>transport                                                                                                                                                                                           | GO:000367<br>6//nucleic<br>acid binding                                           | -                                                                                               |                                                                               |
| CCG023237<br>.1 | 42.6813 | 51.19707 | 59.4757 | 65.3381 | 55.1634 | 67.2874 | 0.16185 | 2388 | 33.432901 | 101.141849 | 1.597039614 | Up | 0      | 0      | AAEL01282<br>7-PA<br>OS=Aedes<br>aegypti<br>GN=AAELO<br>12827<br>PE=3 SV=1                                                     | ko05200<br>//Pathw<br>ays in<br>cancer;k<br>o04141/<br>/Protein<br>processi<br>ng in<br>endopla<br>smic<br>reticulu<br>m;ko05<br>215//Pro<br>state<br>cancer;k<br>o04621/<br>/NOD-<br>like<br>receptor<br>signalin<br>g | GO:000552<br>4//ATP<br>binding;GO:<br>0051082//un<br>folded<br>protein<br>binding | GO:0006457<br>//protein<br>folding;GO:0<br>006950//resp<br>onse to<br>stress                    |                                                                               |

|                 |         |          |         |         |         |         |         |      |           |            |              |      |       |       |                                                                                          |                                |   |                                                                                                |                                                            |
|-----------------|---------|----------|---------|---------|---------|---------|---------|------|-----------|------------|--------------|------|-------|-------|------------------------------------------------------------------------------------------|--------------------------------|---|------------------------------------------------------------------------------------------------|------------------------------------------------------------|
| CCG023088<br>.1 | 5.05262 | 4.392131 | 5.56389 | 3.66536 | 4.65097 | 4.6665  | 0.13665 | 3078 | 2.8478966 | 6.48511242 | 1.187234797  | Up   | ##### | ##### | AAEL01481<br>5-PA<br>(Fragment)<br>OS=Aedes<br>aegypti<br>GN=AAEL0<br>14815<br>PE=4 SV=1 | -                              | - | -                                                                                              | -                                                          |
| CCG022489<br>.1 | 15.5273 | 16.10361 | 17.1272 | 21.8795 | 15.3577 | 22.5519 | 0.18026 | 949  | 9.9613716 | 35.1424616 | 1.818798946  | Up   | ##### | ##### | AAEL01166<br>5-PA<br>OS=Aedes<br>aegypti<br>GN=AAEL0<br>11665<br>PE=2 SV=1               | -                              | - | -                                                                                              | -                                                          |
| CCG022381<br>.1 | 46.6355 | 44.40605 | 59.4176 | 36.9522 | 49.7498 | 39.8072 | 0.17252 | 1899 | 55.075479 | 24.5389062 | -1.166339184 | Down | ##### | ##### | AAEL00177<br>0-PA<br>OS=Aedes<br>aegypti<br>GN=AAEL0<br>01770<br>PE=4 SV=1               | -                              | - | -                                                                                              | -                                                          |
| CCG022221<br>.1 | 6.55003 | 8.865487 | 8.10164 | 10.7409 | 9.88563 | 10.5274 | 0.17628 | 663  | 6.0274288 | 15.0273135 | 1.317972502  | Up   | ##### | ##### | AAEL01429<br>6-PA<br>OS=Aedes<br>aegypti<br>GN=AAEL0<br>14296<br>PE=4 SV=1               | ko04530<br>//Tight<br>junction | - | GO:000519<br>8//structural<br>molecule<br>activity                                             | -                                                          |
| CCG022083<br>.1 | 24.2474 | 15.43124 | 23.9736 | 17.2705 | 22.2941 | 24.729  | 0.18671 | 2613 | 12.399227 | 37.0587167 | 1.579562751  | Up   | 0     | 0     | AGAP0056<br>09-PB<br>OS=Anophe<br>les gambiae<br>GN=AGAP0<br>05609<br>PE=4 SV=4          | ko04144<br>//Endoc<br>ytosis   | - | GO:000806<br>0//ARF<br>GTPase<br>activator<br>activity;GO:<br>0008270//zi<br>nc ion<br>binding | GO:0032312<br>//regulation<br>of ARF<br>GTPase<br>activity |
| CCG022026<br>.1 | 25.7982 | 26.35676 | 35.0036 | 33.397  | 21.5708 | 31.5594 | 0.17906 | 1961 | 44.525498 | 18.5933109 | -1.25984804  | Down | ##### | ##### | AAEL01496<br>0-PA<br>(Fragment)<br>OS=Aedes<br>aegypti<br>GN=AAEL0<br>14960<br>PE=4 SV=1 | -                              | - | GO:000551<br>5//protein<br>binding                                                             | -                                                          |

|                 |         |          |         |         |         |         |         |      |          |            |              |      |       |       |                                                                            |                                                                                                                                                                                                           |                                                                                                                                                                                                                                                                                                                                                                                                                     |                                  |
|-----------------|---------|----------|---------|---------|---------|---------|---------|------|----------|------------|--------------|------|-------|-------|----------------------------------------------------------------------------|-----------------------------------------------------------------------------------------------------------------------------------------------------------------------------------------------------------|---------------------------------------------------------------------------------------------------------------------------------------------------------------------------------------------------------------------------------------------------------------------------------------------------------------------------------------------------------------------------------------------------------------------|----------------------------------|
| CCG021835<br>.1 | 145.205 | 132.1936 | 147.849 | 187.728 | 213.683 | 173.325 | 0.18399 | 6417 | 111.6664 | 234.983686 | 1.073365436  | Up   | 0     | 0     | AAEL01734<br>9-PA<br>OS=Aedes<br>aegypti<br>PE=2 SV=1                      | ko04141<br>//Protein<br>processi<br>ng in<br>endopla<br>smic<br>reticulu<br>m;ko04<br>612//Ant<br>igen<br>processi<br>ng and<br>present<br>ation;ko<br>05020//<br>Prion<br>disease<br>s;ko030<br>60//Prot | GO:000552<br>4//ATP<br>binding                                                                                                                                                                                                                                                                                                                                                                                      | -                                |
| CCG021738<br>.1 | 1.53557 | 1.065325 | 0.8761  | 1.04037 | 1.19777 | 1.19005 | 0.19303 | 3384 | 1.739614 | 0.64048852 | -1.441522569 | Down | ##### | ##### | AAEL00981<br>3-PA<br>OS=Aedes<br>aegypti<br>GN=AAELO<br>09813<br>PE=4 SV=1 | GO:001602<br>0//membra<br>ne                                                                                                                                                                              | GO:000487<br>2//receptor<br>activity;GO:<br>0004970//io<br>notropic<br>glutamate<br>receptor<br>activity;GO:<br>0005216//io<br>n channel<br>activity;GO:<br>0005234//ex<br>tracellular-<br>glutamate-<br>gated ion<br>channel<br>activity;GO:<br>0008080//N-<br>acetyltransf<br>erase<br>activity;GO:<br>0016747//tra<br>nsferase<br>activity,<br>transferring<br>acyl groups<br>other than<br>amino-acyl<br>groups | GO:0006811<br>//ion<br>transport |

|                 |         |          |         |         |         |         |         |      |           |            |             |    |       |       |                                                                                                                 |                                                                                                                                       |                                                                |                                                                                                           |                             |
|-----------------|---------|----------|---------|---------|---------|---------|---------|------|-----------|------------|-------------|----|-------|-------|-----------------------------------------------------------------------------------------------------------------|---------------------------------------------------------------------------------------------------------------------------------------|----------------------------------------------------------------|-----------------------------------------------------------------------------------------------------------|-----------------------------|
| CCG021101<br>.1 | 13.2314 | 13.79872 | 12.0877 | 14.8817 | 10.6395 | 16.982  | 0.16208 | 1613 | 8.1517289 | 25.812342  | 1.662883059 | Up | 0     | 0     | RING finger<br>protein 121<br>OS=Culex<br>quinquefasc<br>iatus<br>GN=CpipJ_<br>CPIJ00683<br>1 PE=4<br>SV=1      | -                                                                                                                                     | -                                                              | GO:000551<br>5//protein<br>binding;GO:<br>0008270//zi<br>nc ion<br>binding                                | -                           |
| CCG020519<br>.1 | 16.0794 | 16.39716 | 14.5437 | 14.3789 | 20.4619 | 15.7783 | 0.13581 | 1355 | 9.2916105 | 22.2649394 | 1.260773099 | Up | ##### | ##### | AAEL00856<br>1-PA<br>OS=Aedes<br>aegypti<br>GN=AAEL0<br>08561<br>PE=4 SV=1                                      | -                                                                                                                                     | -                                                              | -                                                                                                         | -                           |
| CCG019944<br>.1 | 825.511 | 1237.726 | 1430.38 | 1330.65 | 1122.16 | 1130.04 | 0.17794 | 411  | 490.23135 | 1769.85845 | 1.852099324 | Up | ##### | ##### | 60S<br>ribosomal<br>protein L27<br>OS=Aedes<br>aegypti<br>GN=AAEL0<br>11587<br>PE=3 SV=1                        | ko03010<br>//Riboso<br>me                                                                                                             | GO:000562<br>2//intracellu<br>lar;GO:0005<br>840//riboso<br>me | GO:000373<br>5//structural<br>constituent<br>of ribosome                                                  | GO:0006412<br>//translation |
| CCG019892<br>.1 | 10.45   | 9.888299 | 11.396  | 7.70382 | 6.95428 | 7.80206 | 0.19759 | 2877 | 3.9878064 | 11.6163061 | 1.54248408  | Up | ##### | ##### | AAEL00646<br>6-PA<br>(Fragment)<br>OS=Aedes<br>aegypti<br>GN=AAEL0<br>06466<br>PE=4 SV=1                        | ko01100<br>//Metab<br>olic<br>pathway<br>s;ko005<br>32//Glyc<br>osamino<br>glycan<br>biosynth<br>esis -<br>chondroi<br>tin<br>sulfate | GO:003258<br>0//Golgi<br>cisterna<br>membrane                  | GO:000548<br>8//binding;G<br>O:0016758//<br>transferase<br>activity,<br>transferring<br>hexosyl<br>groups | -                           |
| CCG019426<br>.1 | 2559.69 | 2772.395 | 3539.93 | 3722.73 | 2409.05 | 2607.47 | 0.18893 | 405  | 1360.8144 | 3854.12843 | 1.501934378 | Up | 0     | 0     | 60S<br>ribosomal<br>protein L32<br>OS=Culex<br>quinquefasc<br>iatus<br>GN=CpipJ_<br>CPIJ00122<br>0 PE=4<br>SV=1 | ko03010<br>//Riboso<br>me                                                                                                             | GO:000562<br>2//intracellu<br>lar;GO:0005<br>840//riboso<br>me | GO:000373<br>5//structural<br>constituent<br>of ribosome                                                  | GO:0006412<br>//translation |

|                 |         |          |         |         |         |         |         |       |           |            |              |      |       |       |                                                                            |                                                                                                                                                   |   |                                                                                                            |                                                                                                                    |
|-----------------|---------|----------|---------|---------|---------|---------|---------|-------|-----------|------------|--------------|------|-------|-------|----------------------------------------------------------------------------|---------------------------------------------------------------------------------------------------------------------------------------------------|---|------------------------------------------------------------------------------------------------------------|--------------------------------------------------------------------------------------------------------------------|
| CCG019316<br>.1 | 24.0824 | 22.21436 | 17.8682 | 20.08   | 23.5968 | 18.7168 | 0.12278 | 1831  | 9.6922449 | 27.7413305 | 1.51713422   | Up   | ##### | ##### | AAEL00666<br>3-PA<br>OS=Aedes<br>aegypti<br>GN=AAELO<br>06663<br>PE=4 SV=1 | -                                                                                                                                                 | - | GO:000551<br>5//protein<br>binding                                                                         | -                                                                                                                  |
| CCG018888<br>.1 | 1.09018 | 0.891449 | 1.28952 | 0.89059 | 0.79024 | 0.93169 | 0.18363 | 40924 | 1.2799361 | 0.58343522 | -1.133427439 | Down | ##### | ##### | AAEL01141<br>2-PA<br>OS=Aedes<br>aegypti<br>GN=AAELO<br>11412<br>PE=4 SV=1 | -                                                                                                                                                 | - | GO:000551<br>5//protein<br>binding;GO:<br>0005543//ph<br>ospholipid<br>binding                             | -                                                                                                                  |
| CCG018659<br>.2 | 4.39285 | 4.954161 | 4.09763 | 4.19743 | 4.32368 | 4.62435 | 0.07062 | 37887 | 2.8433269 | 6.40537275 | 1.171702573  | Up   | 0     | 0     | AAEL00186<br>9-PA<br>OS=Aedes<br>aegypti<br>GN=AAELO<br>01869<br>PE=4 SV=1 | ko01100<br>//Metab<br>olic<br>pathway<br>s;ko002<br>30//Puri<br>ne<br>metaboli<br>sm;ko00<br>983//Dru<br>g<br>metaboli<br>sm -<br>other<br>enzyme | - | GO:000392<br>2//GMP<br>synthase<br>(glutamine-<br>hydrolyzing)<br>activity;GO:<br>0005524//A<br>TP binding | GO:0006164<br>//purine<br>nucleotide<br>biosynthetic<br>process;GO:<br>0006177//G<br>MP<br>biosynthetic<br>process |
| CCG018559<br>.2 | 12.1955 | 12.6653  | 12.544  | 7.60133 | 8.85491 | 11.3611 | 0.19631 | 2800  | 7.2281232 | 15.4940077 | 1.100017354  | Up   | 0     | 0     | AAEL00219<br>0-PA<br>OS=Aedes<br>aegypti<br>GN=AAELO<br>02190<br>PE=4 SV=1 | -                                                                                                                                                 | - | -                                                                                                          | -                                                                                                                  |



|                 |         |          |         |         |         |         |         |       |           |            |              |      |       |       |                                                                            |                                                                                                                                                                          |                      |                                |                                                                                                    |
|-----------------|---------|----------|---------|---------|---------|---------|---------|-------|-----------|------------|--------------|------|-------|-------|----------------------------------------------------------------------------|--------------------------------------------------------------------------------------------------------------------------------------------------------------------------|----------------------|--------------------------------|----------------------------------------------------------------------------------------------------|
| CCG018260<br>.1 | 4.38654 | 4.39352  | 3.54076 | 4.30378 | 3.07064 | 3.70273 | 0.14041 | 660   | 1.3672188 | 6.03824781 | 2.142885795  | Up   | ##### | ##### | AAEL00920<br>2-PA<br>OS=Aedes<br>aegypti<br>GN=AAEL0<br>09202<br>PE=4 SV=1 | ko01100<br>//Metabolic<br>pathways;<br>ko00230//Purine<br>metabolism;<br>ko00240//Pyrimidine<br>metabolism;<br>ko03020//RNA<br>polymerase;<br>ko04623//Cytosolic<br>DNA- | -                    | -                              | -                                                                                                  |
| CCG017994<br>.1 | 18.4797 | 27.23574 | 22.9207 | 19.695  | 20.689  | 20.4443 | 0.14513 | 24512 | 27.394258 | 13.4944197 | -1.021510573 | Down | 0     | 0     | AAEL00304<br>6-PA<br>OS=Aedes<br>aegypti<br>GN=AAEL0<br>03046<br>PE=4 SV=1 | ko04142<br>//Lysosome                                                                                                                                                    | GO:0005764//lysosome | -                              | GO:0006629<br>//lipid<br>metabolic<br>process;<br>GO:0006665//sphingolipid<br>metabolic<br>process |
| CCG017810<br>.1 | 6.79774 | 5.631188 | 6.01105 | 5.38182 | 5.84712 | 6.15375 | 0.08193 | 1851  | 2.6000056 | 9.70748474 | 1.900582831  | Up   | 0     | 0     | AAEL01146<br>5-PA<br>OS=Aedes<br>aegypti<br>GN=AAEL0<br>11465<br>PE=4 SV=1 | -                                                                                                                                                                        | -                    | -                              | -                                                                                                  |
| CCG017390<br>.1 | 3.08964 | 2.991295 | 2.39676 | 2.52503 | 3.25229 | 2.96521 | 0.11672 | 15353 | 1.5085447 | 4.42187022 | 1.551499226  | Up   | ##### | ##### | AAEL01037<br>8-PA<br>OS=Aedes<br>aegypti<br>GN=AAEL0<br>10378<br>PE=4 SV=1 | -                                                                                                                                                                        | -                    | GO:0005515//protein<br>binding | -                                                                                                  |
| CCG017294<br>.1 | 36.7618 | 51.88637 | 29.3563 | 35.7555 | 39.9119 | 42.443  | 0.19237 | 941   | 58.769446 | 26.1165447 | -1.170102255 | Down | ##### | ##### | AAEL01202<br>3-PA<br>OS=Aedes<br>aegypti<br>GN=AAEL0<br>12023<br>PE=4 SV=1 | -                                                                                                                                                                        | -                    | -                              | -                                                                                                  |

|                 |         |          |         |         |         |         |         |      |           |            |              |      |       |       |                                                                            |                                              |                                  |                                                                                                                                                              |                             |
|-----------------|---------|----------|---------|---------|---------|---------|---------|------|-----------|------------|--------------|------|-------|-------|----------------------------------------------------------------------------|----------------------------------------------|----------------------------------|--------------------------------------------------------------------------------------------------------------------------------------------------------------|-----------------------------|
| CCG017039<br>.1 | 6.17312 | 4.757251 | 3.57358 | 4.23934 | 4.99279 | 4.25454 | 0.19007 | 1425 | 2.7440322 | 5.76504915 | 1.07103551   | Up   | ##### | ##### | AAEL00630<br>0-PA<br>OS=Aedes<br>aegypti<br>GN=AAELO<br>06300<br>PE=4 SV=1 | ko04115<br>//p53<br>signalin<br>g<br>pathway | -                                | -                                                                                                                                                            | -                           |
| CCG016979<br>.2 | 778.025 | 813.3981 | 900.419 | 773.521 | 695.232 | 813.55  | 0.0843  | 2286 | 458.30624 | 1168.79313 | 1.350635762  | Up   | ##### | ##### | AAEL01078<br>7-PA<br>OS=Aedes<br>aegypti<br>GN=AAELO<br>10787<br>PE=3 SV=1 | ko03040<br>//Spliceo<br>some                 | -                                | GO:000367<br>6//nucleic<br>acid<br>binding;GO:<br>0004386//he<br>licase<br>activity;GO:<br>0005524//A<br>TP<br>binding;GO:<br>0008026//A<br>TP-<br>dependent | -                           |
| CCG016602<br>.2 | 2.96238 | 2.57557  | 3.43879 | 2.06609 | 3.64391 | 3.00723 | 0.19452 | 213  | 5.8503395 | 0.16412337 | -5.155667791 | Down | ##### | ##### | -                                                                          | -                                            | -                                | -                                                                                                                                                            | -                           |
| CCG016700<br>.1 | 38.1497 | 50.77071 | 43.1591 | 46.6864 | 46.1567 | 45.3005 | 0.09309 | 1150 | 27.463265 | 63.1376877 | 1.200998265  | Up   | ##### | ##### | AAEL00921<br>7-PA<br>OS=Aedes<br>aegypti<br>GN=AAELO<br>09217<br>PE=4 SV=1 | -                                            | -                                | -                                                                                                                                                            | -                           |
| CCG016699<br>.1 | 12.2631 | 13.36915 | 14.191  | 13.6102 | 13.1895 | 18.538  | 0.15637 | 1020 | 9.5207451 | 27.5553476 | 1.533185933  | Up   | ##### | ##### | AAEL00922<br>5-PA<br>OS=Aedes<br>aegypti<br>GN=AAELO<br>09225<br>PE=4 SV=1 | -                                            | GO:000573<br>9//mitochon<br>dron | -                                                                                                                                                            | GO:0006412<br>//translation |
| CCG016285<br>.1 | 14.4105 | 11.18409 | 10.0648 | 11.1247 | 15.7909 | 12.9932 | 0.17476 | 953  | 7.7552931 | 18.2311265 | 1.233150491  | Up   | ##### | ##### | AAEL00070<br>1-PA<br>OS=Aedes<br>aegypti<br>GN=AAELO<br>00701<br>PE=4 SV=1 | -                                            | GO:000584<br>0//ribosome         | GO:000373<br>5//structural<br>constituent<br>of ribosome                                                                                                     | GO:0006412<br>//translation |

|                 |         |          |         |         |         |         |         |      |           |            |             |    |       |       |                                                                            |                                                                                                                     |                                                                  |                                                                                                                                                                             |                                                                                                                            |
|-----------------|---------|----------|---------|---------|---------|---------|---------|------|-----------|------------|-------------|----|-------|-------|----------------------------------------------------------------------------|---------------------------------------------------------------------------------------------------------------------|------------------------------------------------------------------|-----------------------------------------------------------------------------------------------------------------------------------------------------------------------------|----------------------------------------------------------------------------------------------------------------------------|
| CCG016238<br>.1 | 32.4067 | 36.73636 | 37.1494 | 25.4395 | 24.694  | 29.1269 | 0.17525 | 5792 | 16.143326 | 42.1104795 | 1.383241481 | Up | 0     | 0     | AAEL00432<br>7-PA<br>OS=Aedes<br>aegypti<br>GN=AAEL0<br>04327<br>PE=3 SV=1 | ko00970<br>//Amino<br>acyl-<br>tRNA<br>biosynth<br>esis                                                             | GO:000573<br>7//cytoplas<br>m                                    | GO:000016<br>6//nucleotid<br>e<br>binding;GO:<br>0004812//a<br>minoacyl-<br>tRNA ligase<br>activity;GO:<br>0004832//va<br>line-tRNA<br>ligase<br>activity;GO:<br>0005524//A | GO:0006418<br>//tRNA<br>aminoacylati<br>on for protein<br>translation;G<br>O:0006438//<br>valyl-tRNA<br>aminoacylati<br>on |
| CCG014835<br>.1 | 5.73652 | 5.499712 | 4.72049 | 4.24469 | 3.24207 | 5.2432  | 0.19403 | 1197 | 2.0461778 | 8.44021887 | 2.044348872 | Up | 0     | 0     | AAEL01170<br>3-PA<br>OS=Aedes<br>aegypti<br>GN=AAEL0<br>11703<br>PE=4 SV=1 | ko01100<br>//Metab<br>olic<br>pathway<br>s;ko007<br>60//Nico<br>tinate<br>and<br>nicotina<br>mide<br>metaboli<br>sm | GO:000395<br>1//NAD+<br>kinase<br>activity                       | GO:0008152<br>//metabolic<br>process                                                                                                                                        |                                                                                                                            |
| CCG014810<br>.1 | 19.6059 | 21.28283 | 15.2294 | 17.8519 | 15.3834 | 19.8246 | 0.13684 | 939  | 4.3930719 | 35.2561109 | 3.004571319 | Up | 0     | 0     | AAEL00672<br>7-PA<br>OS=Aedes<br>aegypti<br>GN=AAEL0<br>06727<br>PE=4 SV=1 | -                                                                                                                   | -                                                                | -                                                                                                                                                                           |                                                                                                                            |
| CCG014302<br>.1 | 26.2689 | 30.2943  | 33.5184 | 28.2459 | 22.3124 | 25.8712 | 0.13982 | 2922 | 17.190835 | 34.551507  | 1.007109016 | Up | ##### | ##### | AAEL00651<br>9-PA<br>OS=Aedes<br>aegypti<br>GN=AAEL0<br>06519<br>PE=4 SV=1 | -                                                                                                                   | -                                                                | -                                                                                                                                                                           |                                                                                                                            |
| CCG014174<br>.1 | 33.3993 | 62.16628 | 56.8901 | 54.454  | 53.6801 | 58.1383 | 0.19054 | 2556 | 26.309716 | 89.966958  | 1.773799555 | Up | ##### | ##### | AAEL00283<br>4-PA<br>OS=Aedes<br>aegypti<br>GN=AAEL0<br>02834<br>PE=4 SV=1 | ko01100<br>//Metab<br>olic<br>pathway<br>s;ko005<br>62//Inosi<br>tol<br>phospha<br>te<br>metaboli<br>sm             | GO:000451<br>2//inositol-3-<br>phosphate<br>synthase<br>activity | GO:0006021<br>//inositol<br>biosynthetic<br>process;GO:<br>0008654//ph<br>ospholipid<br>biosynthetic<br>process                                                             |                                                                                                                            |

|                 |         |          |         |         |         |         |         |      |           |            |              |      |       |       |                                                                                                                 |                           |                                                                                                              |                                                                       |                                                                           |
|-----------------|---------|----------|---------|---------|---------|---------|---------|------|-----------|------------|--------------|------|-------|-------|-----------------------------------------------------------------------------------------------------------------|---------------------------|--------------------------------------------------------------------------------------------------------------|-----------------------------------------------------------------------|---------------------------------------------------------------------------|
| CCG014051<br>.1 | 1871.73 | 1974.567 | 2554.88 | 2546.1  | 1863.67 | 2109.24 | 0.14869 | 661  | 1138.6005 | 3079.87178 | 1.435608708  | Up   | 0     | 0     | 60S<br>ribosomal<br>protein L17<br>OS=Culex<br>quinquefasc<br>iatus<br>GN=CpipJ_<br>CPIJ01562<br>4 PE=3<br>SV=1 | ko03010<br>//Riboso<br>me | GO:000562<br>2//intracellul<br>ar;GO:0005<br>840//riboso<br>me;GO:001<br>5934//large<br>ribosomal<br>subunit | GO:000373<br>5//structural<br>constituent<br>of ribosome              | GO:0006412<br>//translation                                               |
| CCG013809<br>.1 | 15.6377 | 11.68286 | 11.4218 | 13.453  | 13.3194 | 12.5085 | 0.11779 | 1023 | 5.8805111 | 19.1364956 | 1.702313204  | Up   | 0     | 0     | Putative<br>arsenite-<br>translocatin<br>g ATPase<br>OS=Glossin<br>a morsitans<br>morsitans<br>PE=2 SV=1        | -                         | -                                                                                                            | GO:000552<br>4//ATP<br>binding;GO:<br>0016887//A<br>TPase<br>activity | GO:0071722<br>//detoxificatio<br>n of arsenic-<br>containing<br>substance |
| CCG013430<br>.1 | 643.224 | 575.8558 | 660.05  | 797.531 | 546.181 | 492.078 | 0.17308 | 276  | 3.4251238 | 980.731656 | 8.161558512  | Up   | ##### | ##### | Ribosomal<br>protein L37<br>OS=Aedes<br>aegypti<br>PE=3 SV=1                                                    | ko03010<br>//Riboso<br>me | GO:000562<br>2//intracellul<br>ar;GO:0005<br>840//riboso<br>me                                               | GO:000373<br>5//structural<br>constituent<br>of ribosome              | GO:0006412<br>//translation                                               |
| CCG013234<br>.1 | 207.068 | 228.3037 | 281.682 | 340.865 | 266.756 | 250.739 | 0.17788 | 869  | 111.30595 | 390.172988 | 1.809583155  | Up   | 0     | 0     | Ribosomal<br>protein S19<br>OS=Aedes<br>albopictus<br>PE=2 SV=1                                                 | ko03010<br>//Riboso<br>me | GO:000562<br>2//intracellul<br>ar;GO:0005<br>840//riboso<br>me                                               | GO:000373<br>5//structural<br>constituent<br>of ribosome              | GO:0006412<br>//translation                                               |
| CCG012510<br>.1 | 9.22208 | 8.874453 | 7.99122 | 12.0514 | 10.7704 | 9.65687 | 0.14835 | 2274 | 17.83792  | 1.47581116 | -3.595367345 | Down | ##### | ##### | AAEL01092<br>1-PA<br>OS=Aedes<br>aegypti<br>GN=AAEL0<br>10921<br>PE=4 SV=1                                      | -                         | GO:001602<br>0//membra<br>ne                                                                                 | GO:000521<br>5//transporte<br>r activity                              | GO:0006810<br>//transport                                                 |

|                 |         |          |         |         |         |         |         |      |           |            |             |      |       |       |                                                                            |                                                                                                                                    |                                        |                                                                                                                                                              |                                                             |
|-----------------|---------|----------|---------|---------|---------|---------|---------|------|-----------|------------|-------------|------|-------|-------|----------------------------------------------------------------------------|------------------------------------------------------------------------------------------------------------------------------------|----------------------------------------|--------------------------------------------------------------------------------------------------------------------------------------------------------------|-------------------------------------------------------------|
| CCG012397<br>.1 | 33.0701 | 38.27269 | 35.0371 | 32.0729 | 28.0396 | 35.2272 | 0.1031  | 3091 | 20.657724 | 49.7966007 | 1.269365932 | Up   | ##### | ##### | Uridine<br>kinase<br>OS=Aedes<br>aegypti<br>GN=AAELO<br>11273<br>PE=3 SV=1 | ko01100<br>//Metabolic<br>pathways;<br>ko00983//Drug<br>metabolism -<br>other<br>enzymes;<br>ko00240//Pyri<br>midine<br>metabolism | -                                      | GO:0005524//ATP<br>binding;GO:<br>0016301//ki<br>nase<br>activity;GO:<br>0016773//ph<br>osphotransf<br>erase<br>activity,<br>alcohol<br>group as<br>acceptor | GO:0008152<br>//metabolic<br>process                        |
| CCG012308<br>.1 | 8.43324 | 10.29874 | 7.45281 | 8.26356 | 12.3462 | 9.50549 | 0.18773 | 1404 | 6.2128605 | 12.7981156 | 1.042601836 | Up   | ##### | ##### | AAELO1022<br>3-PA<br>OS=Aedes<br>aegypti<br>GN=AAELO<br>10223<br>PE=4 SV=1 | ko01100<br>//Metabolic<br>pathways;<br>ko00564//Glyc<br>erophospholipid<br>metabolism                                              | -                                      | GO:0004609//phosphati<br>dylserine<br>decarboxylase<br>activity                                                                                              | GO:0008654<br>//phospholipi<br>d<br>biosynthetic<br>process |
| CCG011445<br>.2 | 6.39854 | 5.858197 | 6.83611 | 5.75208 | 7.12491 | 4.71754 | 0.14203 | 1398 | 7.2845687 | 2.15050916 | -1.76016529 | Down | ##### | ##### | AAELO1435<br>5-PA<br>OS=Aedes<br>aegypti<br>GN=AAELO<br>14355<br>PE=4 SV=1 | -                                                                                                                                  | -                                      | -                                                                                                                                                            | -                                                           |
| CCG010559<br>.1 | 53.4576 | 33.51711 | 51.9897 | 51.2668 | 37.1533 | 48.8533 | 0.18467 | 636  | 30.538239 | 67.1682613 | 1.137162811 | Up   | ##### | ##### | AAELO1287<br>5-PA<br>OS=Aedes<br>aegypti<br>GN=AAELO<br>12875<br>PE=2 SV=1 | ko04145<br>//Phago<br>some;ko<br>04130//<br>SNARE<br>interacti<br>ons in<br>vesicula<br>r<br>transport                             | GO:0016021//integral<br>to<br>membrane | -                                                                                                                                                            | GO:0016192<br>//vesicle-<br>mediated<br>transport           |

|                 |         |          |         |         |         |         |         |      |           |            |             |    |       |       |                                                                                       |                               |                          |                                                        |                                         |
|-----------------|---------|----------|---------|---------|---------|---------|---------|------|-----------|------------|-------------|----|-------|-------|---------------------------------------------------------------------------------------|-------------------------------|--------------------------|--------------------------------------------------------|-----------------------------------------|
| CCG010206<br>.1 | 0.79107 | 0.901967 | 0.71364 | 0.71624 | 0.66168 | 0.84689 | 0.11809 | 1173 | 0.2930587 | 1.40071527 | 2.256902055 | Up | ##### | ##### | AAEL00172<br>4-PA<br>(Fragment)<br>OS=Aedes<br>aegypti<br>GN=GPRN<br>NB3 PE=4<br>SV=2 | -                             | GO:001602<br>0//membrane | -                                                      | -                                       |
| CCG009883<br>.1 | 89.3897 | 71.88664 | 100.444 | 78.2518 | 63.396  | 97.8369 | 0.17707 | 840  | 46.6017   | 149.07208  | 1.677555582 | Up | 0     | 0     | AAEL01095<br>4-PA<br>OS=Aedes<br>aegypti<br>GN=AAEL0<br>10954<br>PE=4 SV=1            | -                             | -                        | -                                                      | -                                       |
| CCG009526<br>.1 | 22.0016 | 22.4732  | 20.6588 | 23.0947 | 16.1825 | 24.7361 | 0.13655 | 2129 | 12.674962 | 36.7973219 | 1.537619388 | Up | ##### | ##### | AAEL01144<br>2-PA<br>OS=Aedes<br>aegypti<br>GN=AAEL0<br>11442<br>PE=4 SV=1            | ko03013<br>//RNA<br>transport | -                        | GO:001677<br>9//nucleotidy<br>ltransferase<br>activity | GO:0009058<br>//biosynthetic<br>process |
| CCG009017<br>.1 | 9.27921 | 10.96818 | 12.0158 | 11.8681 | 9.12938 | 13.6068 | 0.15498 | 836  | 4.2147347 | 22.9988663 | 2.448049008 | Up | 0     | 0     | AAEL01465<br>7-PA<br>OS=Aedes<br>aegypti<br>GN=AAEL0<br>14657<br>PE=4 SV=1            | -                             | -                        | -                                                      | -                                       |

|                 |         |          |         |         |         |         |         |       |           |            |             |    |       |       |                                                                                  |                                                                                                                                                                                                                |                                                                                                                           |                                                                    |                             |
|-----------------|---------|----------|---------|---------|---------|---------|---------|-------|-----------|------------|-------------|----|-------|-------|----------------------------------------------------------------------------------|----------------------------------------------------------------------------------------------------------------------------------------------------------------------------------------------------------------|---------------------------------------------------------------------------------------------------------------------------|--------------------------------------------------------------------|-----------------------------|
| CCG008931<br>.1 | 2.82337 | 3.586155 | 3.0013  | 2.39142 | 3.08539 | 2.77788 | 0.13442 | 26148 | 1.8471004 | 3.70866834 | 1.005638956 | Up | ##### | ##### | UDP-glucose 6-dehydrogenase<br>OS=Aedes aegypti<br>GN=AAELO11242<br>PE=3 SV=1    | ko001100<br>//Metabolic pathways;ko00500//Starch and sucrose metabolism;ko00520//Amino sugar and nucleotide sugar metabolism;ko00040//Pentose and glucuronate interconversions;ko00053//Ascorbate and alderate | GO:0016616//oxidoreductase activity, acting on the CH-OH group of donors, NAD or NADP as acceptor;GO:0051287//NAD binding | GO:0055114<br>//oxidation-reduction process                        |                             |
| CCG008569<br>.1 | 222.701 | 177.9331 | 232.559 | 186.061 | 135.203 | 177.431 | 0.18653 | 1483  | 63.339069 | 291.52327  | 2.20244347  | Up | 0     | 0     | Uncharacterized protein<br>OS=Anopheles darlingi<br>GN=AND_10459<br>PE=3<br>SV=1 | ko03010<br>//Ribosome                                                                                                                                                                                          | GO:0005622//intracellular;GO:0005840//ribosome;GO:0015935//small ribosomal subunit                                        | GO:0003735//structural constituent of ribosome                     | GO:0006412<br>//translation |
| CCG008270<br>.1 | 1345.47 | 1281.778 | 1839.29 | 1470.97 | 1194.42 | 1065.24 | 0.19707 | 577   | 517.49859 | 1612.98822 | 1.640109068 | Up | ##### | ##### | Ubiquitin<br>OS=Anopheles stephensi<br>GN=Ubi-p63E<br>PE=2<br>SV=1               | ko03010<br>//Ribosome                                                                                                                                                                                          | GO:0005840//ribosome                                                                                                      | GO:0003735//structural constituent of ribosome;GO:0005515//protein | GO:0006412<br>//translation |

|                 |         |          |         |         |         |         |         |      |           |            |             |    |       |       |                                                                                |                                                                               |                               |                                                                                                                                                                              |                                                                                                                             |
|-----------------|---------|----------|---------|---------|---------|---------|---------|------|-----------|------------|-------------|----|-------|-------|--------------------------------------------------------------------------------|-------------------------------------------------------------------------------|-------------------------------|------------------------------------------------------------------------------------------------------------------------------------------------------------------------------|-----------------------------------------------------------------------------------------------------------------------------|
| CCG008208<br>.1 | 18.2946 | 18.63321 | 19.9467 | 15.7058 | 11.41   | 16.0384 | 0.18238 | 1266 | 9.1302201 | 22.9465466 | 1.329555508 | Up | 0     | 0     | AAEL00666<br>3-PA<br>OS=Aedes<br>aegypti<br>GN=AAELO<br>06663<br>PE=4 SV=1     | -                                                                             | -                             | -                                                                                                                                                                            | -                                                                                                                           |
| CCG007928<br>.1 | 15.722  | 14.54482 | 11.4741 | 12.4622 | 14.6242 | 18.1815 | 0.16427 | 687  | 9.444585  | 26.918382  | 1.511032377 | Up | 0     | 0     | AAEL01093<br>1-PA<br>OS=Aedes<br>aegypti<br>GN=AAELO<br>10931<br>PE=2 SV=1     | -                                                                             | -                             | -                                                                                                                                                                            | -                                                                                                                           |
| CCG007390<br>.1 | 20.2019 | 19.23263 | 28.1189 | 22.5938 | 16.3184 | 23.2128 | 0.18684 | 2394 | 14.825815 | 31.5997122 | 1.091800016 | Up | ##### | ##### | AGAP0054<br>04-PA<br>OS=Anopheles<br>gambiae<br>GN=AGAP0<br>05404<br>PE=4 SV=3 | ko04141<br>//Protein<br>processi<br>ng in<br>endopla<br>smic<br>reticulu<br>m | GO:001602<br>0//membra<br>ne  | -                                                                                                                                                                            | -                                                                                                                           |
| CCG006993<br>.1 | 46.9801 | 50.20122 | 55.2212 | 34.6354 | 36.2446 | 39.3811 | 0.18896 | 715  | 26.202523 | 52.5596469 | 1.004249824 | Up | ##### | ##### | AAEL00741<br>4-PA<br>OS=Aedes<br>aegypti<br>GN=AAELO<br>07414<br>PE=4 SV=1     | -                                                                             | -                             | -                                                                                                                                                                            | -                                                                                                                           |
| CCG006570<br>.1 | 22.1396 | 19.79788 | 23.3615 | 19.0759 | 21.592  | 19.8539 | 0.07888 | 2674 | 10.959371 | 28.7484109 | 1.391317164 | Up | ##### | ##### | AAEL00572<br>8-PA<br>OS=Aedes<br>aegypti<br>GN=AAELO<br>05728<br>PE=3 SV=2     | ko00970<br>//Amino<br>acyl-<br>tRNA<br>biosynth<br>esis                       | GO:000573<br>7//cytoplas<br>m | GO:000016<br>6//nucleotid<br>e<br>binding;GO:<br>0004812//a<br>minoacyl-<br>tRNA ligase<br>activity;GO:<br>0004820//gl<br>ycine-tRNA<br>ligase<br>activity;GO:<br>0005524//A | GO:0006418<br>//tRNA<br>aminoacylati<br>on for protein<br>translation;G<br>O:0006426//<br>glycyl-tRNA<br>aminoacylati<br>on |
| CCG006321<br>.1 | 7.16067 | 7.179526 | 6.50998 | 6.73634 | 5.21766 | 9.19185 | 0.18461 | 1752 | 4.3165943 | 14.0671148 | 1.704361032 | Up | 0     | 0     | AAEL00042<br>6-PA<br>OS=Aedes<br>aegypti<br>GN=AAELO<br>00426<br>PE=4 SV=1     | -                                                                             | -                             | -                                                                                                                                                                            | -                                                                                                                           |



|                 |         |          |         |         |         |         |         |      |           |            |              |      |       |       |                                                                                            |                                                                         |                      |                                                                |                                               |
|-----------------|---------|----------|---------|---------|---------|---------|---------|------|-----------|------------|--------------|------|-------|-------|--------------------------------------------------------------------------------------------|-------------------------------------------------------------------------|----------------------|----------------------------------------------------------------|-----------------------------------------------|
| CCG006308<br>.1 | 8.45106 | 6.250947 | 8.75042 | 9.98067 | 8.78754 | 8.26436 | 0.14468 | 1423 | 2.0835641 | 14.4451629 | 2.793461092  | Up   | 0     | 0     | CAAX<br>prenyl<br>protease 2<br>OS=Culex<br>quinquefasciatus<br>GN=CpipJ_CPIJ00269<br>PE=4 | ko00900<br>//Terpenoid backbone biosynthesis                            | GO:0016020//membrane | -                                                              | -                                             |
| CCG006063<br>.1 | 48.4494 | 52.68632 | 49.2411 | 46.8429 | 55.8018 | 32.6256 | 0.1684  | 357  | 54.283894 | 10.9673025 | -2.307315497 | Down | ##### | ##### | AAEL00594<br>8-PA<br>OS=Aedes aegypti<br>GN=AAEL00594<br>PE=4 SV=1                         | -                                                                       | GO:0005634//nucleus  | GO:0004861//cyclin-dependent protein kinase inhibitor activity | GO:0007050//cell cycle arrest                 |
| CCG005989<br>.1 | 9.5741  | 12.61904 | 9.93908 | 7.64964 | 9.72931 | 10.8633 | 0.16247 | 1888 | 6.3953895 | 15.3312782 | 1.261373841  | Up   | 0     | 0     | AAEL00941<br>2-PA<br>OS=Aedes aegypti<br>GN=AAEL00941<br>PE=4 SV=1                         | -                                                                       | -                    | GO:0003723//RNA binding                                        | -                                             |
| CCG005981<br>.4 | 27.5232 | 21.33739 | 30.8937 | 23.2665 | 24.1932 | 28.721  | 0.13995 | 1269 | 17.607771 | 39.8342539 | 1.177797228  | Up   | ##### | ##### | AAEL00540<br>5-PA<br>OS=Aedes aegypti<br>GN=AAEL00540<br>PE=4 SV=1                         | -                                                                       | -                    | -                                                              | -                                             |
| CCG004532<br>.1 | 8.12321 | 14.24925 | 11.0392 | 13.3357 | 12.631  | 10.2231 | 0.19427 | 297  | 5.4978112 | 14.9484887 | 1.443070377  | Up   | ##### | ##### | AAEL01022<br>3-PA<br>OS=Aedes aegypti<br>GN=AAEL01022<br>PE=4 SV=1                         | ko01100<br>//Metabolic pathways;ko00564//Glycerophospholipid metabolism | -                    | GO:0004609//phosphatidylserine decarboxylase activity          | GO:0008654//phospholipid biosynthetic process |
| CCG003530<br>.1 | 58.8943 | 55.5866  | 36.6415 | 49.0885 | 59.2488 | 52.8763 | 0.16256 | 1326 | 32.988831 | 72.763834  | 1.141243909  | Up   | ##### | ##### | AAEL00934<br>5-PA<br>OS=Aedes aegypti<br>GN=AAEL00934<br>PE=2 SV=1                         | -                                                                       | GO:0016020//membrane | -                                                              | -                                             |

|                 |         |          |         |         |         |         |         |      |           |            |              |      |       |       |                                                                 |                                                                                                                                                                 |                                                                    |                                                                                                               |                                                                                       |
|-----------------|---------|----------|---------|---------|---------|---------|---------|------|-----------|------------|--------------|------|-------|-------|-----------------------------------------------------------------|-----------------------------------------------------------------------------------------------------------------------------------------------------------------|--------------------------------------------------------------------|---------------------------------------------------------------------------------------------------------------|---------------------------------------------------------------------------------------|
| CCG003296<br>.1 | 23.689  | 20.69933 | 19.5132 | 17.5655 | 13.164  | 19.4246 | 0.1844  | 3364 | 8.9413835 | 29.9078242 | 1.741952969  | Up   | 0     | 0     | AAEL006415-PA<br>OS=Aedes aegypti<br>GN=AAEL006415<br>PE=3 SV=1 | ko00970<br>//Aminoacyl-tRNA biosynthesis                                                                                                                        | GO:0005737<br>//cytoplasm                                          | GO:0000166<br>//nucleotide binding;GO:0004812<br>//aminoacyl-tRNA ligase activity;GO:0005524<br>//ATP binding | GO:0006418<br>//tRNA aminoacylation for protein translation                           |
| CCG003277<br>.1 | 10.3709 | 10.83362 | 6.95018 | 9.44283 | 8.62391 | 12.0557 | 0.18457 | 1360 | 5.6555754 | 18.4559138 | 1.70633746   | Up   | 0     | 0     | AAEL007895-PA<br>OS=Aedes aegypti<br>GN=AAEL007895<br>PE=4 SV=1 | ko01100<br>//Metabolic pathways;ko00532<br>//Glycosaminoglycan biosynthesis - chondroitin sulfate;ko00534<br>//Glycosaminoglycan biosynthesis - heparan sulfate | GO:0016757<br>//transferase activity, transferring glycosyl groups | GO:0005975<br>//carbohydrate metabolic process                                                                |                                                                                       |
| CCG003063<br>.1 | 7.01729 | 6.76908  | 4.94289 | 4.76091 | 6.63484 | 6.03935 | 0.1605  | 3126 | 9.8420761 | 2.236614   | -2.137646384 | Down | ##### | ##### | AAEL009547-PA<br>OS=Aedes aegypti<br>GN=AAEL009547<br>PE=3 SV=1 | ko01100<br>//Metabolic pathways;ko00260<br>//Glycine, serine and threonine metabolism                                                                           | GO:0005737<br>//cytoplasm                                          | GO:0004047<br>//aminomethyltransferase activity;GO:0016491<br>//oxidoreductase activity                       | GO:0006546<br>//glycine catabolic process;GO:0055114<br>//oxidation-reduction process |

|                 |         |          |         |         |         |         |         |      |           |            |              |      |       |       |                                                                                          |                                                                      |                       |                                                                                                                                                                                                              |                                                                                                                          |
|-----------------|---------|----------|---------|---------|---------|---------|---------|------|-----------|------------|--------------|------|-------|-------|------------------------------------------------------------------------------------------|----------------------------------------------------------------------|-----------------------|--------------------------------------------------------------------------------------------------------------------------------------------------------------------------------------------------------------|--------------------------------------------------------------------------------------------------------------------------|
| CCG002765<br>.1 | 9.59617 | 11.2387  | 9.22305 | 14.7965 | 10.1323 | 12.5231 | 0.18766 | 1698 | 21.813846 | 3.23230239 | -2.754610106 | Down | ##### | ##### | AAEL012509-PA (Fragment) OS=Aedes aegypti GN=AAEL012509 PE=4 SV=1                        | ko01100 //Metabolic pathways;ko00983//Drug metabolism - other enzyme | -                     | -                                                                                                                                                                                                            | -                                                                                                                        |
| CCG002662<br>.1 | 22.3007 | 35.6378  | 26.6771 | 24.2723 | 22.5357 | 24.8306 | 0.19074 | 1701 | 14.045369 | 35.6159281 | 1.34242807   | Up   | ##### | ##### | AAEL001206-PA OS=Aedes aegypti GN=AAEL001206 PE=3 SV=1                                   | ko00970 //Aminoacyl-tRNA biosynthesis                                | GO:0005737//cytoplasm | GO:0000166//nucleotide binding;GO:0004812//aminoacyl-tRNA ligase activity;GO:0004829//threonine-tRNA ligase activity;GO:0005524//ATP binding;GO:0016876//ligase activity, forming aminoacyl-tRNA and related | GO:0006418 //tRNA aminoacylation for protein translation;GO:0006435//tRNA aminoacylation;GO:0043039//tRNA aminoacylation |
| CCG002273<br>.1 | 1.80671 | 1.13775  | 1.19143 | 1.29826 | 1.36245 | 1.40311 | 0.17402 | 2342 | 0.8806777 | 1.92554129 | 1.128577959  | Up   | ##### | ##### | Putative uncharacterized protein OS=Culex quinquefasciatus GN=CpipJ_CPIJ018868 PE=4 SV=1 | ko04330 //Notch signaling pathway                                    | -                     | -                                                                                                                                                                                                            | GO:0006355 //regulation of transcription, DNA-dependent                                                                  |
| CCG002188<br>.1 | 857.08  | 785.6753 | 843.6   | 929.267 | 629.87  | 584.563 | 0.17637 | 558  | 349.61039 | 819.514728 | 1.229021836  | Up   | ##### | ##### | 605 ribosomal protein L27a OS=Aedes albopictus PE=2 SV=1                                 | ko03010 //Ribosome                                                   | -                     | -                                                                                                                                                                                                            | -                                                                                                                        |

|                 |         |          |         |         |         |         |         |      |           |            |              |      |       |       |                                                                                          |                                                                                                                                          |                                   |                                                                                                                                                                                                |                                                                                                                                    |
|-----------------|---------|----------|---------|---------|---------|---------|---------|------|-----------|------------|--------------|------|-------|-------|------------------------------------------------------------------------------------------|------------------------------------------------------------------------------------------------------------------------------------------|-----------------------------------|------------------------------------------------------------------------------------------------------------------------------------------------------------------------------------------------|------------------------------------------------------------------------------------------------------------------------------------|
| CCG002121<br>.1 | 10.43   | 10.39614 | 6.29686 | 8.85555 | 9.95067 | 11.3761 | 0.18759 | 1911 | 6.7456412 | 16.006537  | 1.24663372   | Up   | ##### | ##### | AAEL00185<br>9-PA<br>OS=Aedes<br>aegypti<br>GN=AAEL0<br>01859<br>PE=4 SV=1               | ko04144<br>//Endoc<br>ytosis                                                                                                             | -                                 | -                                                                                                                                                                                              | GO:0006904<br>//vesicle<br>docking<br>involved in<br>exocytosis;G<br>O:0016192//<br>vesicle-<br>mediated<br>transport              |
| CCG002118<br>.1 | 168.258 | 156.5439 | 162.806 | 203.912 | 205.231 | 189.126 | 0.11772 | 5345 | 287.84497 | 90.4075322 | -1.670777106 | Down | 0     | 0     | Ubiquitin C<br>variant<br>(Fragment)<br>OS=Homo<br>sapiens<br>PE=2 SV=1                  | ko03320<br>//PPAR<br>signalin<br>g<br>pathway                                                                                            | -                                 | GO:000551<br>5//protein<br>binding                                                                                                                                                             | -                                                                                                                                  |
| CCG001876<br>.1 | 17.454  | 17.63143 | 16.1617 | 12.8678 | 11.0358 | 18.4069 | 0.19036 | 2907 | 8.6619417 | 28.1518149 | 1.700465569  | Up   | 0     | 0     | AAEL01470<br>9-PA<br>OS=Aedes<br>aegypti<br>GN=AAEL0<br>14709<br>PE=3 SV=1               | ko00970<br>//Amino<br>acyl-<br>tRNA<br>biosynth<br>esis;ko0<br>0450//S<br>elenoco<br>mpound<br>metaboli<br>sm                            | GO:000573<br>7//cytoplas<br>m     | GO:000016<br>6//nucleotid<br>e<br>binding;GO:<br>0004812//a<br>minoacyl-<br>tRNA ligase<br>activity;GO:<br>0004825//m<br>ethionine-<br>tRNA ligase<br>activity;GO:<br>0005524//A<br>TP binding | GO:0006418<br>//tRNA<br>aminoacylati<br>on for protein<br>translation;G<br>O:0006431//<br>methionyl-<br>tRNA<br>aminoacylati<br>on |
| CCG001798<br>.1 | 4.00088 | 3.271193 | 3.56556 | 3.42181 | 3.53646 | 5.29669 | 0.19489 | 3414 | 1.787259  | 8.80612713 | 2.300758934  | Up   | ##### | ##### | AAEL00246<br>5-PA<br>(Fragment)<br>OS=Aedes<br>aegypti<br>GN=AAEL0<br>02465<br>PE=4 SV=1 | ko01100<br>//Metab<br>olic<br>pathway<br>s;ko005<br>63//Glyc<br>osylpho<br>sphatidy<br>linositol(<br>GPI)-<br>anchor<br>biosynth<br>esis | -                                 | GO:000382<br>4//catalytic<br>activity                                                                                                                                                          | -                                                                                                                                  |
| CCG001783<br>.1 | 13.8437 | 16.22151 | 13.5916 | 13.0185 | 9.62334 | 15.4061 | 0.16856 | 1976 | 10.024822 | 20.7874368 | 1.052135305  | Up   | ##### | ##### | AAEL00939<br>4-PA<br>OS=Aedes<br>aegypti<br>GN=AAEL0<br>09394<br>PE=4 SV=1               | -                                                                                                                                        | GO:000562<br>2//intracellul<br>ar | GO:000827<br>0//zinc ion<br>binding                                                                                                                                                            | -                                                                                                                                  |

|                 |         |          |         |         |         |         |         |      |           |            |              |      |       |       |                                                                                                                         |   |   |                                    |   |
|-----------------|---------|----------|---------|---------|---------|---------|---------|------|-----------|------------|--------------|------|-------|-------|-------------------------------------------------------------------------------------------------------------------------|---|---|------------------------------------|---|
| CCG001753<br>.1 | 17.2161 | 16.48848 | 9.77097 | 14.928  | 14.0844 | 18.0994 | 0.1984  | 1742 | 11.174104 | 25.0246677 | 1.163191714  | Up   | ##### | ##### | AAEL00449<br>7-PA<br>OS=Aedes<br>aegypti<br>GN=AAELO<br>04497<br>PE=4 SV=1                                              | - | - | -                                  | - |
| CCG001451<br>.1 | 2.10592 | 1.667466 | 2.0408  | 2.4827  | 1.75842 | 2.46188 | 0.16376 | 564  | 1.1428121 | 3.78094837 | 1.726159946  | Up   | ##### | ##### | AAEL00835<br>6-PA<br>OS=Aedes<br>aegypti<br>GN=AAELO<br>08356<br>PE=4 SV=1                                              | - | - | -                                  | - |
| CCG000958<br>.1 | 7.29081 | 7.162047 | 8.39005 | 5.00088 | 5.52583 | 7.14529 | 0.18575 | 952  | 10.471616 | 3.81897141 | -1.455228073 | Down | ##### | ##### | -                                                                                                                       | - | - | -                                  | - |
| CCG000705<br>.1 | 7.389   | 6.893737 | 5.32876 | 6.48262 | 7.9851  | 5.86853 | 0.14673 | 216  | 2.1882735 | 9.54878856 | 2.125524635  | Up   | ##### | ##### | Putative<br>uncharacter<br>ized protein<br>OS=Culex<br>quinquefasc<br>iatus<br>GN=CpipJ_<br>CPIJ00749<br>1 PE=4<br>SV=1 | - | - | -                                  | - |
| CCG000461<br>.1 | 11.2602 | 17.31791 | 12.5408 | 12.2868 | 10.6588 | 15.1484 | 0.19235 | 267  | 22.048141 | 8.24858216 | -1.418438956 | Down | ##### | ##### | AAEL01110<br>0-PA<br>OS=Aedes<br>aegypti<br>GN=AAELO<br>11100<br>PE=4 SV=1                                              | - | - | -                                  | - |
| CCG000390<br>.1 | 11.7449 | 13.24728 | 12.6404 | 16.8251 | 16.0642 | 16.3766 | 0.15124 | 1479 | 5.2876888 | 27.4655291 | 2.376912917  | Up   | 0     | 0     | AAEL01037<br>8-PA<br>OS=Aedes<br>aegypti<br>GN=AAELO<br>10378<br>PE=4 SV=1                                              | - | - | GO:000551<br>5//protein<br>binding | - |

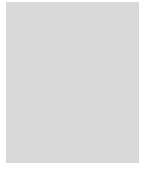

Supplement: pnas.1516410112.sd030.pdf [file pnas.1516410112.sd030.pdf]
