# Supplementary material
Source: PubMed Central journal article supplement (PMC4640774)
Supplement: pnas.1516410112.sd02.pdf [file pnas.1516410112.sd02.pdf]

**Table S3.1. List of sequences used as blast queries and number of blast hits in *Aedes albopictus* (A) and *Aedes aegypti* (B)**

| GenBank N. | Classification             | Type | Abbreviation | N. Blast hits |   |
|------------|----------------------------|------|--------------|---------------|---|
|            |                            |      |              | A             | B |
| AB813812.1 | Insect Specific Flavivirus | RNA  |              |               | 1 |
| AB813811.1 | Insect Specific Flavivirus | RNA  |              |               | 1 |
| AB813810.1 | Insect Specific Flavivirus | RNA  |              |               | 1 |
| AB813809.1 | Insect Specific Flavivirus | RNA  |              |               | 1 |
| AB813808.1 | Insect Specific Flavivirus | RNA  |              |               | 1 |
| AB813807.1 | Insect Specific Flavivirus | RNA  |              |               | 1 |
| AB813806.1 | Insect Specific Flavivirus | RNA  |              |               | 1 |
| AB813805.1 | Insect Specific Flavivirus | RNA  |              |               | 1 |
| AB813804.1 | Insect Specific Flavivirus | RNA  |              |               | 1 |
| AB813803.1 | Insect Specific Flavivirus | RNA  |              |               | 1 |
| AB813802.1 | Insect Specific Flavivirus | RNA  |              |               | 1 |
| AB813801.1 | Insect Specific Flavivirus | RNA  |              |               | 1 |
| AB813800.1 | Insect Specific Flavivirus | RNA  |              |               | 1 |
| AB813799.1 | Insect Specific Flavivirus | RNA  |              |               | 1 |
| AB813798.1 | Insect Specific Flavivirus | RNA  |              |               | 1 |
| AB813797.1 | Insect Specific Flavivirus | RNA  |              |               | 1 |
| AB813796.1 | Insect Specific Flavivirus | RNA  |              |               | 1 |
| AB813795.1 | Insect Specific Flavivirus | RNA  |              |               | 1 |
| AB813794.1 | Insect Specific Flavivirus | RNA  |              |               | 1 |
| AB813793.1 | Insect Specific Flavivirus | RNA  |              |               | 1 |
| AB813792.1 | Insect Specific Flavivirus | RNA  |              |               | 1 |
| AB813791.1 | Insect Specific Flavivirus | RNA  |              |               | 1 |
| AB813790.1 | Insect Specific Flavivirus | RNA  |              |               | 1 |
| AB813789.1 | Insect Specific Flavivirus | RNA  |              |               | 1 |
| AB813788.1 | Insect Specific Flavivirus | RNA  |              |               | 1 |
| AB813787.1 | Insect Specific Flavivirus | RNA  |              |               | 1 |
| AB813786.1 | Insect Specific Flavivirus | RNA  |              |               | 1 |
| AB813785.1 | Insect Specific Flavivirus | RNA  |              |               | 1 |
| AB813784.1 | Insect Specific Flavivirus | RNA  |              |               | 1 |
| HM579916.1 | Insect Specific Flavivirus | RNA  |              |               |   |
| HM579915.1 | Insect Specific Flavivirus | RNA  |              |               |   |
| HM579914.1 | Insect Specific Flavivirus | RNA  |              |               |   |

|            |                            |     |  |  |  |
|------------|----------------------------|-----|--|--|--|
| HM579913.1 | Insect Specific Flavivirus | RNA |  |  |  |
| HM579912.1 | Insect Specific Flavivirus | RNA |  |  |  |
| AB488430.1 | Insect Specific Flavivirus | RNA |  |  |  |
| AB488428.1 | Insect Specific Flavivirus | RNA |  |  |  |
| AB488424.1 | Insect Specific Flavivirus | RNA |  |  |  |
| AB488420.1 | Insect Specific Flavivirus | RNA |  |  |  |
| AB488416.1 | Insect Specific Flavivirus | RNA |  |  |  |
| GQ477012.1 | Insect Specific Flavivirus | RNA |  |  |  |
| GQ477011.1 | Insect Specific Flavivirus | RNA |  |  |  |
| GQ477010.1 | Insect Specific Flavivirus | RNA |  |  |  |
| GQ477009.1 | Insect Specific Flavivirus | RNA |  |  |  |
| GQ477008.1 | Insect Specific Flavivirus | RNA |  |  |  |
| GQ477007.1 | Insect Specific Flavivirus | RNA |  |  |  |
| GQ477006.1 | Insect Specific Flavivirus | RNA |  |  |  |
| GQ477005.1 | Insect Specific Flavivirus | RNA |  |  |  |
| GQ477004.1 | Insect Specific Flavivirus | RNA |  |  |  |
| HQ441865.1 | Insect Specific Flavivirus | RNA |  |  |  |
| HQ441864.1 | Insect Specific Flavivirus | RNA |  |  |  |
| HQ441863.1 | Insect Specific Flavivirus | RNA |  |  |  |
| HQ441862.1 | Insect Specific Flavivirus | RNA |  |  |  |
| HQ441861.1 | Insect Specific Flavivirus | RNA |  |  |  |
| HQ441860.1 | Insect Specific Flavivirus | RNA |  |  |  |
| HQ441859.1 | Insect Specific Flavivirus | RNA |  |  |  |
| HQ441858.1 | Insect Specific Flavivirus | RNA |  |  |  |
| HQ441857.1 | Insect Specific Flavivirus | RNA |  |  |  |
| HQ441856.1 | Insect Specific Flavivirus | RNA |  |  |  |
| HQ441855.1 | Insect Specific Flavivirus | RNA |  |  |  |
| HQ441854.1 | Insect Specific Flavivirus | RNA |  |  |  |
| HQ441853.1 | Insect Specific Flavivirus | RNA |  |  |  |
| HQ441852.1 | Insect Specific Flavivirus | RNA |  |  |  |
| HQ441851.1 | Insect Specific Flavivirus | RNA |  |  |  |
| HQ441850.1 | Insect Specific Flavivirus | RNA |  |  |  |
| HQ441849.1 | Insect Specific Flavivirus | RNA |  |  |  |
| HQ441848.1 | Insect Specific Flavivirus | RNA |  |  |  |
| HQ441847.1 | Insect Specific Flavivirus | RNA |  |  |  |
| HQ441846.1 | Insect Specific Flavivirus | RNA |  |  |  |

|            |                            |     |  |  |  |
|------------|----------------------------|-----|--|--|--|
| AB488440.1 | Insect Specific Flavivirus | RNA |  |  |  |
| AB488439.1 | Insect Specific Flavivirus | RNA |  |  |  |
| AB488438.1 | Insect Specific Flavivirus | RNA |  |  |  |
| AB488437.1 | Insect Specific Flavivirus | RNA |  |  |  |
| AB488436.1 | Insect Specific Flavivirus | RNA |  |  |  |
| AB488435.1 | Insect Specific Flavivirus | RNA |  |  |  |
| AB488434.1 | Insect Specific Flavivirus | RNA |  |  |  |
| AB488433.1 | Insect Specific Flavivirus | RNA |  |  |  |
| AB488412.1 | Insect Specific Flavivirus | RNA |  |  |  |
| AB813783.1 | Insect Specific Flavivirus | RNA |  |  |  |
| AB813782.1 | Insect Specific Flavivirus | RNA |  |  |  |
| AB813781.1 | Insect Specific Flavivirus | RNA |  |  |  |
| AB813780.1 | Insect Specific Flavivirus | RNA |  |  |  |
| AB813779.1 | Insect Specific Flavivirus | RNA |  |  |  |
| AB813778.1 | Insect Specific Flavivirus | RNA |  |  |  |
| AB813777.1 | Insect Specific Flavivirus | RNA |  |  |  |
| AB813776.1 | Insect Specific Flavivirus | RNA |  |  |  |
| AB813775.1 | Insect Specific Flavivirus | RNA |  |  |  |
| AB813774.1 | Insect Specific Flavivirus | RNA |  |  |  |
| AB813773.1 | Insect Specific Flavivirus | RNA |  |  |  |
| AB813772.1 | Insect Specific Flavivirus | RNA |  |  |  |
| AB813771.1 | Insect Specific Flavivirus | RNA |  |  |  |
| AB813770.1 | Insect Specific Flavivirus | RNA |  |  |  |
| AB813769.1 | Insect Specific Flavivirus | RNA |  |  |  |
| AB813768.1 | Insect Specific Flavivirus | RNA |  |  |  |
| AB813767.1 | Insect Specific Flavivirus | RNA |  |  |  |
| AB813766.1 | Insect Specific Flavivirus | RNA |  |  |  |
| AB813765.1 | Insect Specific Flavivirus | RNA |  |  |  |
| AB813764.1 | Insect Specific Flavivirus | RNA |  |  |  |
| AB813763.1 | Insect Specific Flavivirus | RNA |  |  |  |
| AB813762.1 | Insect Specific Flavivirus | RNA |  |  |  |
| AB813761.1 | Insect Specific Flavivirus | RNA |  |  |  |
| AB813760.1 | Insect Specific Flavivirus | RNA |  |  |  |
| AB813759.1 | Insect Specific Flavivirus | RNA |  |  |  |
| AB813758.1 | Insect Specific Flavivirus | RNA |  |  |  |
| AB813757.1 | Insect Specific Flavivirus | RNA |  |  |  |

|            |                            |     |  |  |  |
|------------|----------------------------|-----|--|--|--|
| AB813756.1 | Insect Specific Flavivirus | RNA |  |  |  |
| AB813755.1 | Insect Specific Flavivirus | RNA |  |  |  |
| AB488429.1 | Insect Specific Flavivirus | RNA |  |  |  |
| AB488427.1 | Insect Specific Flavivirus | RNA |  |  |  |
| AB488426.1 | Insect Specific Flavivirus | RNA |  |  |  |
| AB488423.1 | Insect Specific Flavivirus | RNA |  |  |  |
| AB488422.1 | Insect Specific Flavivirus | RNA |  |  |  |
| AB488419.1 | Insect Specific Flavivirus | RNA |  |  |  |
| AB488418.1 | Insect Specific Flavivirus | RNA |  |  |  |
| AB488415.1 | Insect Specific Flavivirus | RNA |  |  |  |
| AB488414.1 | Insect Specific Flavivirus | RNA |  |  |  |
| AB488432.1 | Insect Specific Flavivirus | RNA |  |  |  |
| AB488431.1 | Insect Specific Flavivirus | RNA |  |  |  |
| AB488411.1 | Insect Specific Flavivirus | RNA |  |  |  |
| AB488410.1 | Insect Specific Flavivirus | RNA |  |  |  |
| AB813754.1 | Insect Specific Flavivirus | RNA |  |  |  |
| AB813753.1 | Insect Specific Flavivirus | RNA |  |  |  |
| AB813752.1 | Insect Specific Flavivirus | RNA |  |  |  |
| AB813751.1 | Insect Specific Flavivirus | RNA |  |  |  |
| AB813750.1 | Insect Specific Flavivirus | RNA |  |  |  |
| AB813749.1 | Insect Specific Flavivirus | RNA |  |  |  |
| AB813748.1 | Insect Specific Flavivirus | RNA |  |  |  |
| AB813747.1 | Insect Specific Flavivirus | RNA |  |  |  |
| AB813746.1 | Insect Specific Flavivirus | RNA |  |  |  |
| AB813745.1 | Insect Specific Flavivirus | RNA |  |  |  |
| AB813744.1 | Insect Specific Flavivirus | RNA |  |  |  |
| AB813743.1 | Insect Specific Flavivirus | RNA |  |  |  |
| AB813742.1 | Insect Specific Flavivirus | RNA |  |  |  |
| AB813741.1 | Insect Specific Flavivirus | RNA |  |  |  |
| AB813740.1 | Insect Specific Flavivirus | RNA |  |  |  |
| AB813739.1 | Insect Specific Flavivirus | RNA |  |  |  |
| AB813738.1 | Insect Specific Flavivirus | RNA |  |  |  |
| AB813737.1 | Insect Specific Flavivirus | RNA |  |  |  |
| AB813736.1 | Insect Specific Flavivirus | RNA |  |  |  |
| AB813735.1 | Insect Specific Flavivirus | RNA |  |  |  |
| AB813734.1 | Insect Specific Flavivirus | RNA |  |  |  |

|             |                            |     |          |   |   |
|-------------|----------------------------|-----|----------|---|---|
| AB813733.1  | Insect Specific Flavivirus | RNA |          |   |   |
| AB813732.1  | Insect Specific Flavivirus | RNA |          |   |   |
| AB813731.1  | Insect Specific Flavivirus | RNA |          |   |   |
| AB813730.1  | Insect Specific Flavivirus | RNA |          |   |   |
| AB813729.1  | Insect Specific Flavivirus | RNA |          |   |   |
| AB813728.1  | Insect Specific Flavivirus | RNA |          |   |   |
| AB813727.1  | Insect Specific Flavivirus | RNA |          |   |   |
| AB813726.1  | Insect Specific Flavivirus | RNA |          |   |   |
| AB488421.1  | Insect Specific Flavivirus | RNA |          |   |   |
| AB488417.1  | Insect Specific Flavivirus | RNA |          |   |   |
| AB488413.1  | Insect Specific Flavivirus | RNA |          |   |   |
| AB488409.1  | Insect Specific Flavivirus | RNA |          |   |   |
| JX860637.1  | Insect Specific Flavivirus | RNA |          |   |   |
| JX860636.1  | Insect Specific Flavivirus | RNA |          |   |   |
| JX860635.1  | Insect Specific Flavivirus | RNA |          |   |   |
| JX860634.1  | Insect Specific Flavivirus | RNA |          |   |   |
| NC_001564.1 | Insect Specific Flavivirus | RNA | CFA      |   | 3 |
| NC_005064.1 | Insect Specific Flavivirus | RNA | KRV      | 3 |   |
| AY149904.1  | Insect Specific Flavivirus | RNA | KRV-SR75 | 3 |   |
| AY149905.1  | Insect Specific Flavivirus | RNA | KRV-SR82 | 3 |   |
| NC_012932.1 | Insect Specific Flavivirus | RNA | AEFV     |   |   |
| AB488408.1  | Insect Specific Flavivirus | RNA | AEFVN    |   |   |
| KC181923.1  | Insect Specific Flavivirus | RNA | AEFVS    |   |   |
| AB701774.1  | Insect Specific Flavivirus | RNA | CxFV-T2  |   |   |
| AB701773.1  | Insect Specific Flavivirus | RNA | CxFV-T3  |   |   |
| AB701772.1  | Insect Specific Flavivirus | RNA | CxFV-T4  |   |   |
| AB701771.1  | Insect Specific Flavivirus | RNA | CxFV-T5  |   |   |
| AB701770.1  | Insect Specific Flavivirus | RNA | CxFV-T6  |   |   |
| AB701769.1  | Insect Specific Flavivirus | RNA | CxFV-T7  |   |   |
| AB701768.1  | Insect Specific Flavivirus | RNA | CxFV-T8  |   |   |
| AB701767.1  | Insect Specific Flavivirus | RNA | CxFV-T9  |   |   |
| AB701766.1  | Insect Specific Flavivirus | RNA | CxFV-T10 |   |   |
| AB701776.1  | Insect Specific Flavivirus | RNA | CxFV-T1  |   |   |
| JQ308190.1  | Insect Specific Flavivirus | RNA | CxFV-D1  |   |   |
| JQ308189.1  | Insect Specific Flavivirus | RNA | CxFV-D2  |   |   |
| JQ308188.1  | Insect Specific Flavivirus | RNA | CxFV-D3  |   |   |

|             |                            |     |          |   |  |
|-------------|----------------------------|-----|----------|---|--|
| JQ308187.1  | Insect Specific Flavivirus | RNA | CxFV-H1  |   |  |
| JQ308186.1  | Insect Specific Flavivirus | RNA | CxFV-H2  |   |  |
| FJ663034.1  | Insect Specific Flavivirus | RNA | CxFV-I   |   |  |
| FJ502995.1  | Insect Specific Flavivirus | RNA | CxFV-H3  |   |  |
| NC_008604.2 | Insect Specific Flavivirus | RNA | CxFV     |   |  |
| EU879060.1  | Insect Specific Flavivirus | RNA | CxFV-M   |   |  |
| NC_012671.1 | Insect Specific Flavivirus | RNA | QBV      |   |  |
| FJ644291.1  | Insect Specific Flavivirus | RNA | QBV-VN   |   |  |
| AY632535    | Insect Specific Flavivirus | RNA | CxFV-T11 |   |  |
| AY898809.1  | Flavivirus                 | RNA | ALF      |   |  |
| AY632536.4  | Flavivirus                 | RNA | BeAn     |   |  |
| AY762084.1  | Flavivirus                 | RNA | DENV1S   | 5 |  |
| U88535.1    | Flavivirus                 | RNA | DENV1WP  | 5 |  |
| AY702040.1  | Flavivirus                 | RNA | DENV2I   | 2 |  |
| DQ181799.1  | Flavivirus                 | RNA | DENV2T   | 2 |  |
| AY858044.2  | Flavivirus                 | RNA | DENV3K   | 2 |  |
| AY744685.1  | Flavivirus                 | RNA | DENV3P   | 2 |  |
| AY858047.2  | Flavivirus                 | RNA | DENV3T   | 2 |  |
| AY762085.1  | Flavivirus                 | RNA | DENV4S   | 2 |  |
| AY618988    | Flavivirus                 | RNA | DENV4T   | 1 |  |
| NC_001437.1 | Flavivirus                 | RNA | JEV      | 1 |  |
| M18370.1    | Flavivirus                 | RNA | JEV-CG   | 1 |  |
| AF221499.1  | Flavivirus                 | RNA | JEV-CH   | 1 |  |
| AB241119.1  | Flavivirus                 | RNA | JEV-MIE  | 1 |  |
| AB196925.1  | Flavivirus                 | RNA | JEV-rAT  | 1 |  |
| EF107523.1  | Flavivirus                 | RNA | JEV-WHe  | 1 |  |
| AY632540.2  | Flavivirus                 | RNA | KEDV-Dak |   |  |
| AY632541.4  | Flavivirus                 | RNA | KOKVA    |   |  |
| NC_009029.2 | Flavivirus                 | RNA | KOKVCG   |   |  |
| AF161266.1  | Flavivirus                 | RNA | MEVE1    |   |  |
| AY632542.4  | Flavivirus                 | RNA | ROC      |   |  |
| DQ525916.1  | Flavivirus                 | RNA | SLEV     | 1 |  |
| AY453411.1  | Flavivirus                 | RNA | USUA     |   |  |
| NC_006551.1 | Flavivirus                 | RNA | USUVCG   |   |  |
| AY453412.1  | Flavivirus                 | RNA | USUVS    |   |  |
| DQ256376.1  | Flavivirus                 | RNA | WN8      |   |  |

|             |                          |     |         |      |      |
|-------------|--------------------------|-----|---------|------|------|
| AY278441.1  | Flavivirus               | RNA | WNA     |      |      |
| DQ318020.1  | Flavivirus               | RNA | WNAr    |      |      |
| AF260968.1  | Flavivirus               | RNA | WNE     |      |      |
| DQ116961.1  | Flavivirus               | RNA | WNGH    |      |      |
| DQ118127.1  | Flavivirus               | RNA | WNH     |      |      |
| AY277251.1  | Flavivirus               | RNA | WNLK    |      |      |
| AY278442.1  | Flavivirus               | RNA | WNLV    |      |      |
| AY765264.1  | Flavivirus               | RNA | WNR     |      |      |
| AY688948.1  | Flavivirus               | RNA | WNS     |      |      |
| NC_002031.1 | Flavivirus               | RNA | YFV     |      |      |
| AY968064.1  | Flavivirus               | RNA | YFV-A   |      |      |
| AY968065.1  | Flavivirus               | RNA | YFV-U48 |      |      |
| AY632538.4  | Flavivirus               | RNA | IgV     |      |      |
| AJ299445.1  | Flavivirus               | RNA | MMLV    |      |      |
| NC_003675.1 | Flavivirus               | RNA | RBV     |      |      |
| JQ582840.1  | Flavivirus               | RNA | RBVM    |      |      |
| DQ235145    | Flavivirus               | RNA | GGYV    | 2    |      |
| DQ235146.1  | Flavivirus               | RNA | KDV     |      |      |
| DQ462443.1  | Flavivirus               | RNA | KVL     |      |      |
| NC_003690.1 | Flavivirus               | RNA | LGTV    |      |      |
| NC_005062.1 | Flavivirus               | RNA | OHFV    |      |      |
| AY193805.1  | Flavivirus               | RNA | OHFV-B  |      |      |
| AY438626.1  | Flavivirus               | RNA | OHFV-K  |      |      |
| NC_003687.1 | Flavivirus               | RNA | POWV    |      |      |
| HM440563.1  | Flavivirus               | RNA | POWVA   |      |      |
| HM440562.1  | Flavivirus               | RNA | POWVD   |      |      |
| HM440559.1  | Flavivirus               | RNA | POWVN   |      |      |
| HQ231415.1  | Flavivirus               | RNA | POWVT   |      |      |
| HQ231414.1  | Flavivirus               | RNA | POWVU   |      |      |
| HM440558.1  | Flavivirus               | RNA | POWVW   |      |      |
| NC_001672.1 | Flavivirus               | RNA | TBV     |      |      |
| AY217093.1  | Flavivirus               | RNA | MDJ     |      |      |
| NC_003996.1 | Tamana bat virus, genome | RNA | TABV    |      |      |
| AY223845.1  | Cell Silent Agent        | DNA | CSA-1   | 312  |      |
| AY223844.1  | Cell Silent Agent        | DNA | CSA-2   | 3484 | 1167 |
| AF411835.1  | Cell Silent Agent        | DNA | CSA-3   | 1097 | 124  |

|            |                   |     |        |  |    |
|------------|-------------------|-----|--------|--|----|
| AY347953 § | Cell Silent Agent | DNA | CSA-4  |  | 58 |
| JF707856   | Cell Silent Agent | DNA | FVI-S1 |  |    |
| JF707857   | Cell Silent Agent | DNA | FVI-S2 |  |    |
| JF707858   | Cell Silent Agent | DNA | FVI-S3 |  |    |
| JF707859   | Cell Silent Agent | DNA | FVI-S4 |  |    |
| JF707860   | Cell Silent Agent | DNA | FVI-S5 |  |    |
| KF801604.1 | Cell Silent Agent | DNA | FVI-I1 |  |    |
| KF801601.1 | Cell Silent Agent | DNA | FVI-I2 |  |    |
| KF801590.1 | Cell Silent Agent | DNA | FVI-I3 |  |    |
| KF801606.1 | Cell Silent Agent | DNA | FVI-I4 |  |    |
| KF801597.1 | Cell Silent Agent | DNA | FVI-I5 |  |    |
| KF801602.1 | Cell Silent Agent | DNA | FVI-I6 |  |    |
| KF801607.1 | Cell Silent Agent | DNA | FVI-I7 |  |    |

\* (virus: 142-1179bp), a total of 9 blast hits in *Ae. albopictus*

\*\* (virus: 296-1316bp), 9 blast hits in *Ae. albopictus*

& (virus: 2939-7762 bp), a total of 9 blast hits in *Ae. albopictus*

§ (virus: 548-2026 bp) a total of 9 blast hits in *Ae. albopictus*
