# Supplementary material
Source: PubMed Central journal article supplement (PMC4640774)
Supplement: pnas.1516410112.sd03.pdf [file pnas.1516410112.sd03.pdf]

**Table S3.2. Output of blast analyses of the *Aedes albopictus* genome annotation (Foshan strain).**

BLASTN 2.2.28+

Query: gi|544185967|dbj|AB813812.1| Cell fusing agent virus NS5 Gene for non-structural protein 5, partial cds, strain: NS5-312\_08

0 hits found

BLASTN 2.2.28+

Query: gi|544185965|dbj|AB813811.1| Cell fusing agent virus NS5 Gene for non-structural protein 5, partial cds, strain: NS5-311\_08

0 hits found

BLASTN 2.2.28+

Query: gi|544185963|dbj|AB813810.1| Cell fusing agent virus NS5 Gene for non-structural protein 5, partial cds, strain: NS5-233\_08

0 hits found

BLASTN 2.2.28+

Query: gi|544185961|dbj|AB813809.1| Cell fusing agent virus NS5 Gene for non-structural protein 5, partial cds, strain: NS5-227\_08

0 hits found

BLASTN 2.2.28+

Query: gi|544185959|dbj|AB813808.1| Cell fusing agent virus NS5 Gene for non-structural protein 5, partial cds, strain: NS5-175\_08

0 hits found

BLASTN 2.2.28+

Query: gi|544185957|dbj|AB813807.1| Cell fusing agent virus NS5 gene for non-structural protein 5, partial cds, strain: NS5-174\_08

0 hits found

BLASTN 2.2.28+

Query: gi|544185955|dbj|AB813806.1| Cell fusing agent virus NS5 gene for non-structural protein 5, partial cds, strain: NS5-173\_08

0 hits found

BLASTN 2.2.28+

Query: gi|544185953|dbj|AB813805.1| Cell fusing agent virus NS5 gene for non-structural protein 5, partial cds, strain: NS5-163\_08

0 hits found

BLASTN 2.2.28+

Query: gi|544185951|dbj|AB813804.1| Cell fusing agent virus NS5 gene for non-structural protein 5, partial cds, strain: NS5-158\_08

0 hits found

BLASTN 2.2.28+

Query: gi|544185949|dbj|AB813803.1| Cell fusing agent virus NS5 gene  
for non-structural protein 5, partial cds, strain: NS5-147\_08

0 hits found

BLASTN 2.2.28+

Query: gi|544185947|dbj|AB813802.1| Cell fusing agent virus NS5 gene for non-  
structural protein 5, partial cds, strain: NS5-141\_08

0 hits found

BLASTN 2.2.28+

Query: gi|544185945|dbj|AB813801.1| Cell fusing agent virus NS5  
Gene for non-structural protein 5, partial cds, strain: NS5-60\_12

0 hits found

BLASTN 2.2.28+

Query: gi|544185943|dbj|AB813800.1| Cell fusing agent virus NS5  
gene  
for non-structural protein 5, partial cds, strain: NS5-55\_12

0 hits found

BLASTN 2.2.28+

Query: gi|544185941|dbj|AB813799.1| Cell fusing agent virus NS5  
gene  
for non-structural protein 5, partial cds, strain: NS5-52\_12

0 hits found

BLASTN 2.2.28+

Query: gi|544185939|dbj|AB813798.1| Cell fusing agent virus NS5  
gene  
for non-structural protein 5, partial cds, strain: NS5-50\_12

0 hits found

BLASTN 2.2.28+

Query: gi|544185937|dbj|AB813797.1| Cell fusing agent virus NS5  
gene  
for non-structural protein 5, partial cds, strain: NS5-50\_08

0 hits found

BLASTN 2.2.28+

Query: gi|544185935|dbj|AB813796.1| Cell fusing agent virus NS5  
gene  
for non-structural protein 5, partial cds, strain: NS5-48\_12

0 hits found

BLASTN 2.2.28+  
Query: gi|544185933|dbj|AB813795.1| Cell fusing agent virus NS5  
gene  
for non-structural protein 5, partial cds, strain: NS5-46\_12

0 hits found  
BLASTN 2.2.28+  
Query: gi|544185931|dbj|AB813794.1| Cell fusing agent virus NS5  
gene  
for non-structural protein 5, partial cds, strain: NS5-45\_12

0 hits found  
BLASTN 2.2.28+  
Query: gi|544185929|dbj|AB813793.1| Cell fusing agent virus NS5  
gene  
for non-structural protein 5, partial cds, strain: NS5-44\_12

0 hits found  
BLASTN 2.2.28+  
Query: gi|544185927|dbj|AB813792.1| Cell fusing agent virus NS5  
gene  
for non-structural protein 5, partial cds, strain: NS5-43\_12

0 hits found  
BLASTN 2.2.28+  
Query: gi|544185925|dbj|AB813791.1| Cell fusing agent virus NS5  
gene  
for non-structural protein 5, partial cds, strain: NS5-42\_08

0 hits found  
BLASTN 2.2.28+  
Query: gi|544185923|dbj|AB813790.1| Cell fusing agent virus NS5  
gene  
for non-structural protein 5, partial cds, strain: NS5-23\_12

0 hits found  
BLASTN 2.2.28+  
Query: gi|544185921|dbj|AB813789.1| Cell fusing agent virus NS5  
gene  
for non-structural protein 5, partial cds, strain: NS5-17\_12

0 hits found  
BLASTN 2.2.28+  
Query: gi|544185919|dbj|AB813788.1| Cell fusing agent virus NS5  
gene  
for non-structural protein 5, partial cds, strain: NS5-16\_12

0 hits found  
BLASTN 2.2.28+  
Query: gi|544185917|dbj|AB813787.1| Cell fusing agent virus NS5  
gene  
for non-structural protein 5, partial cds, strain: NS5-15\_12

0 hits found  
BLASTN 2.2.28+  
Query: gi|544185915|dbj|AB813786.1| Cell fusing agent virus NS5  
gene  
for non-structural protein 5, partial cds, strain: NS5-11\_12

0 hits found  
BLASTN 2.2.28+  
Query: gi|544185913|dbj|AB813785.1| Cell fusing agent virus NS5  
gene  
for non-structural protein 5, partial cds, strain: NS5-9\_12

0 hits found  
BLASTN 2.2.28+  
Query: gi|544185911|dbj|AB813784.1| Cell fusing agent virus NS5  
gene  
for non-structural protein 5, partial cds, strain: NS5-8\_12

0 hits found  
BLASTN 2.2.28+  
Query: gi|310751810|gb|HM579916.1| Cell fusing agent virus isolate  
CFAV/Colima-5 NS5 gene, partial cds

0 hits found  
BLASTN 2.2.28+  
Query: gi|310751808|gb|HM579915.1| Cell fusing agent virus isolate  
CFAV/Colima-4 NS5 gene, partial cds

0 hits found  
BLASTN 2.2.28+  
Query: gi|310751806|gb|HM579914.1| Cell fusing agent virus isolate  
CFAV/Colima-3 NS5 gene, partial cds

0 hits found  
BLASTN 2.2.28+  
Query: gi|310751804|gb|HM579913.1| Cell fusing agent virus isolate  
CFAV/Colima-2 NS5 gene, partial cds

0 hits found

BLASTN 2.2.28+  
Query: gi|310751802|gb|HM579912.1| Cell fusing agent virus isolate  
CFAV/Colima-1 NS5 gene, partial cds

0 hits found  
BLASTN 2.2.28+  
Query: gi|251823483|dbj|AB488430.1| Cell fusing agent virus gene  
for  
polyprotein (NS5 region), partial cds, strain: Surabaya-12

0 hits found  
BLASTN 2.2.28+  
Query: gi|251823479|dbj|AB488428.1| Cell fusing agent virus gene  
for  
polyprotein (NS5 region), partial cds, strain: Surabaya-10

0 hits found  
BLASTN 2.2.28+  
Query: gi|251823471|dbj|AB488424.1| Aedes flavivirus gene for  
polyprotein (NS5 region), partial cds, strain: Toyama-26

0 hits found  
BLASTN 2.2.28+  
Query: gi|251823463|dbj|AB488420.1| Aedes flavivirus gene for  
polyprotein (NS5 region), partial cds, strain: Nagasaki-5

0 hits found  
BLASTN 2.2.28+  
Query: gi|251823455|dbj|AB488416.1| Aedes flavivirus gene for  
polyprotein (NS5 region), partial cds, strain: Mie-16

0 hits found  
BLASTN 2.2.28+  
Query: gi|260534087|gb|GQ477012.1| Mosquito flavivirus isolate  
AealFV7 NS5 gene, partial cds

0 hits found  
BLASTN 2.2.28+  
Query: gi|260534085|gb|GQ477011.1| Mosquito flavivirus isolate  
AealFV5 NS5 gene, partial cds

5

0 hits found  
BLASTN 2.2.28+  
Query: gi|260534084|gb|GQ477010.1| Mosquito flavivirus isolate  
AealFV9 nonfunctional NS5 gene, partial sequence

0 hits found  
BLASTN 2.2.28+  
Query: gi|260534083|gb|GQ477009.1| Mosquito flavivirus isolate  
AealFV1 nonfunctional NS5 gene, partial sequence

0 hits found  
BLASTN 2.2.28+  
Query: gi|260534081|gb|GQ477008.1| Mosquito flavivirus isolate  
AealFV8 NS5 gene, partial cds

0 hits found  
BLASTN 2.2.28+  
Query: gi|260534079|gb|GQ477007.1| Mosquito flavivirus isolate  
AealFV6 NS5 gene, partial cds

0 hits found  
BLASTN 2.2.28+  
Query: gi|260534077|gb|GQ477006.1| Mosquito flavivirus isolate  
AealFV2 NS5 gene, partial cds

0 hits found  
BLASTN 2.2.28+  
Query: gi|260534075|gb|GQ477005.1| Mosquito flavivirus isolate  
AealFV3 NS5 gene, partial cds

0 hits found  
BLASTN 2.2.28+  
Query: gi|260534073|gb|GQ477004.1| Mosquito flavivirus isolate  
AealFV4 NS5 gene, partial cds

0 hits found  
BLASTN 2.2.28+  
Query: gi|315661165|gb|HQ441865.1| Mosquito flavivirus isolate PRAa  
NS5 gene, partial cds

0 hits found  
BLASTN 2.2.28+  
Query: gi|315661163|gb|HQ441864.1| Mosquito flavivirus isolate  
REAA5  
NS5 gene, partial cds

0 hits found  
BLASTN 2.2.28+  
Query: gi|315661161|gb|HQ441863.1| Mosquito flavivirus isolate  
REAA4

NS5 gene, partial cds

0 hits found

6

BLASTN 2.2.28+

Query: gi|315661159|gb|HQ441862.1| Mosquito flavivirus isolate BOAa6

NS5 gene, partial cds

0 hits found

BLASTN 2.2.28+

Query: gi|315661157|gb|HQ441861.1| Mosquito flavivirus isolate REAe4

NS5 gene, partial cds

0 hits found

BLASTN 2.2.28+

Query: gi|315661155|gb|HQ441860.1| Mosquito flavivirus isolate BOAa5

NS5 gene, partial cds

0 hits found

BLASTN 2.2.28+

Query: gi|315661153|gb|HQ441859.1| Mosquito flavivirus isolate BOAa4

NS5 gene, partial cds

0 hits found

BLASTN 2.2.28+

Query: gi|315661151|gb|HQ441858.1| Mosquito flavivirus isolate REAa3

NS5 gene, partial cds

0 hits found

BLASTN 2.2.28+

Query: gi|315661149|gb|HQ441857.1| Mosquito flavivirus isolate BOAa3

NS5 gene, partial cds

0 hits found

BLASTN 2.2.28+

Query: gi|315661147|gb|HQ441856.1| Mosquito flavivirus isolate BOAa2

NS5 gene, partial cds

0 hits found

BLASTN 2.2.28+  
Query: gi|315661145|gb|HQ441855.1| Mosquito flavivirus isolate  
BOAa1  
NS5 gene, partial cds

0 hits found  
BLASTN 2.2.28+  
Query: gi|315661141|gb|HQ441853.1| Mosquito flavivirus isolate  
PCAa2  
NS5 gene, partial cds

0 hits found  
BLASTN 2.2.28+  
Query: gi|315661139|gb|HQ441852.1| Mosquito flavivirus isolate MOAa  
NS5 gene, partial cds

0 hits found  
BLASTN 2.2.28+  
7  
Query: gi|315661137|gb|HQ441851.1| Mosquito flavivirus isolate  
REAa1  
NS5 gene, partial cds

0 hits found  
BLASTN 2.2.28+  
Query: gi|315661135|gb|HQ441850.1| Mosquito flavivirus isolate  
FEAa4  
NS5 gene, partial cds

0 hits found  
BLASTN 2.2.28+  
Query: gi|315661133|gb|HQ441849.1| Mosquito flavivirus isolate  
FEAa3  
NS5 gene, partial cds

0 hits found  
BLASTN 2.2.28+  
Query: gi|315661131|gb|HQ441848.1| Mosquito flavivirus isolate  
FEAa2  
NS5 gene, partial cds

0 hits found  
BLASTN 2.2.28+  
Query: gi|315661129|gb|HQ441847.1| Mosquito flavivirus isolate  
FEAa1  
NS5 gene, partial cds



0 hits found  
BLASTN 2.2.28+  
Query: gi|315661127|gb|HQ441846.1| Mosquito flavivirus isolate  
PCAA1  
NS5 gene, partial cds

0 hits found  
BLASTN 2.2.28+  
Query: gi|251823503|dbj|AB488440.1| Culex flavivirus gene for  
polyprotein (NS5 region), partial cds, strain: Mie-19

0 hits found  
BLASTN 2.2.28+  
Query: gi|251823501|dbj|AB488439.1| Culex flavivirus gene for  
polyprotein (NS5 region), partial cds, strain: Mie-1

0 hits found  
BLASTN 2.2.28+  
Query: gi|251823499|dbj|AB488438.1| Culex flavivirus gene for  
polyprotein (NS5 region), partial cds, strain: Osaka-32

0 hits found  
BLASTN 2.2.28+  
Query: gi|251823497|dbj|AB488437.1| Culex flavivirus gene for  
polyprotein (NS5 region), partial cds, strain: Toyama-13

0 hits found  
BLASTN 2.2.28+  
Query: gi|251823495|dbj|AB488436.1| Culex flavivirus gene for  
polyprotein (NS5 region), partial cds, strain: Morioka-1  
8

0 hits found  
BLASTN 2.2.28+  
Query: gi|251823493|dbj|AB488435.1| Culex flavivirus gene for  
polyprotein (NS5 region), partial cds, strain: Hokkaido-4

0 hits found  
BLASTN 2.2.28+  
Query: gi|251823491|dbj|AB488434.1| Culex flavivirus gene for  
polyprotein (NS5 region), partial cds, strain: Narita-1

0 hits found  
BLASTN 2.2.28+  
Query: gi|251823489|dbj|AB488433.1| Culex flavivirus gene for

polyprotein (NS5 region), partial cds, strain: Surabaya-2

0 hits found

BLASTN 2.2.28+

Query: gi|251823447|dbj|AB488412.1| Aedes flavivirus gene for polyprotein (NS5 region), partial cds, strain: Narita-24

0 hits found

BLASTN 2.2.28+

Query: gi|544185909|dbj|AB813783.1| Cell fusing agent virus NS3 gene

for non-structural protein 3, partial cds, strain: NS3-312\_08

0 hits found

BLASTN 2.2.28+

Query: gi|544185907|dbj|AB813782.1| Cell fusing agent virus NS3 gene

for non-structural protein 3, partial cds, strain: NS3-311\_08

0 hits found

BLASTN 2.2.28+

Query: gi|544185905|dbj|AB813781.1| Cell fusing agent virus NS3 gene

for non-structural protein 3, partial cds, strain: NS3-233\_08

0 hits found

BLASTN 2.2.28+

Query: gi|315661143|gb|HQ441854.1| Mosquito flavivirus isolate REAa2

NS5 gene, partial cds

0 hits found

BLASTN 2.2.28+

Query: gi|544185903|dbj|AB813780.1| Cell fusing agent virus NS3 gene

for non-structural protein 3, partial cds, strain: NS3-227\_08

0 hits found

BLASTN 2.2.28+

Query: gi|544185901|dbj|AB813779.1| Cell fusing agent virus NS3 gene

for non-structural protein 3, partial cds, strain: NS3-175\_08

0 hits found

9

BLASTN 2.2.28+

Query: gi|544185899|dbj|AB813778.1| Cell fusing agent virus NS3  
gene  
for non-structural protein 3, partial cds, strain: NS3-174\_08

0 hits found  
BLASTN 2.2.28+  
Query: gi|544185897|dbj|AB813777.1| Cell fusing agent virus NS3  
gene  
for non-structural protein 3, partial cds, strain: NS3-173\_08

0 hits found  
BLASTN 2.2.28+  
Query: gi|544185895|dbj|AB813776.1| Cell fusing agent virus NS3  
gene  
for non-structural protein 3, partial cds, strain: NS3-163\_08

0 hits found  
BLASTN 2.2.28+  
Query: gi|544185893|dbj|AB813775.1| Cell fusing agent virus NS3  
gene  
for non-structural protein 3, partial cds, strain: NS3-158\_08

0 hits found  
BLASTN 2.2.28+  
Query: gi|544185891|dbj|AB813774.1| Cell fusing agent virus NS3  
gene  
for non-structural protein 3, partial cds, strain: NS3-147\_08

0 hits found  
BLASTN 2.2.28+  
Query: gi|544185889|dbj|AB813773.1| Cell fusing agent virus NS3  
gene  
for non-structural protein 3, partial cds, strain: NS3-141\_08

0 hits found  
BLASTN 2.2.28+  
Query: gi|544185887|dbj|AB813772.1| Cell fusing agent virus NS3  
gene  
for non-structural protein 3, partial cds, strain: NS3-60\_12

0 hits found  
BLASTN 2.2.28+  
Query: gi|544185885|dbj|AB813771.1| Cell fusing agent virus NS3  
gene  
for non-structural protein 3, partial cds, strain: NS3-55\_12

0 hits found  
BLASTN 2.2.28+  
Query: gi|544185883|dbj|AB813770.1| Cell fusing agent virus NS3  
gene  
for non-structural protein 3, partial cds, strain: NS3-52\_12

0 hits found  
BLASTN 2.2.28+  
Query: gi|544185881|dbj|AB813769.1| Cell fusing agent virus NS3  
gene  
for non-structural protein 3, partial cds, strain: NS3-50\_12

0 hits found  
BLASTN 2.2.28+  
10  
Query: gi|544185879|dbj|AB813768.1| Cell fusing agent virus NS3  
gene  
for non-structural protein 3, partial cds, strain: NS3-50\_08

0 hits found  
BLASTN 2.2.28+  
Query: gi|544185877|dbj|AB813767.1| Cell fusing agent virus NS3  
gene  
for non-structural protein 3, partial cds, strain: NS3-48\_12

0 hits found  
BLASTN 2.2.28+  
Query: gi|544185875|dbj|AB813766.1| Cell fusing agent virus NS3  
gene  
for non-structural protein 3, partial cds, strain: NS3-46\_12

0 hits found  
BLASTN 2.2.28+  
Query: gi|544185873|dbj|AB813765.1| Cell fusing agent virus NS3  
gene  
for non-structural protein 3, partial cds, strain: NS3-45\_12

0 hits found  
BLASTN 2.2.28+  
Query: gi|544185871|dbj|AB813764.1| Cell fusing agent virus NS3  
gene  
for non-structural protein 3, partial cds, strain: NS3-44\_12

0 hits found  
BLASTN 2.2.28+  
Query: gi|544185869|dbj|AB813763.1| Cell fusing agent virus NS3

gene

for non-structural protein 3, partial cds, strain: NS3-43\_12

0 hits found

BLASTN 2.2.28+

Query: gi|544185867|dbj|AB813762.1| Cell fusing agent virus NS3

gene

for non-structural protein 3, partial cds, strain: NS3-42\_08

0 hits found

BLASTN 2.2.28+

Query: gi|544185865|dbj|AB813761.1| Cell fusing agent virus NS3

gene

for non-structural protein 3, partial cds, strain: NS3-23\_12

0 hits found

BLASTN 2.2.28+

Query: gi|544185863|dbj|AB813760.1| Cell fusing agent virus NS3

gene

for non-structural protein 3, partial cds, strain: NS3-17\_12

0 hits found

BLASTN 2.2.28+

Query: gi|544185861|dbj|AB813759.1| Cell fusing agent virus NS3

gene

for non-structural protein 3, partial cds, strain: NS3-16\_12

0 hits found

BLASTN 2.2.28+

Query: gi|544185859|dbj|AB813758.1| Cell fusing agent virus NS3

gene

for non-structural protein 3, partial cds, strain: NS3-15\_12

11

0 hits found

BLASTN 2.2.28+

Query: gi|544185857|dbj|AB813757.1| Cell fusing agent virus NS3

gene

for non-structural protein 3, partial cds, strain: NS3-11\_12

0 hits found

BLASTN 2.2.28+

Query: gi|544185855|dbj|AB813756.1| Cell fusing agent virus NS3

gene

for non-structural protein 3, partial cds, strain: NS3-9\_12

0 hits found  
BLASTN 2.2.28+  
Query: gi|544185853|dbj|AB813755.1| Cell fusing agent virus NS3  
gene  
for non-structural protein 3, partial cds, strain: NS3-8\_12

0 hits found  
BLASTN 2.2.28+  
Query: gi|251823481|dbj|AB488429.1| Cell fusing agent virus gene  
for  
polyprotein (NS3 region), partial cds, strain: Surabaya-12

0 hits found  
BLASTN 2.2.28+  
Query: gi|251823477|dbj|AB488427.1| Cell fusing agent virus gene  
for  
polyprotein (NS3-h region), partial cds, strain: Surabaya-10

0 hits found  
BLASTN 2.2.28+  
Query: gi|251823475|dbj|AB488426.1| Cell fusing agent virus gene  
for  
polyprotein (NS3-s region), partial cds, strain: Surabaya-10

0 hits found  
BLASTN 2.2.28+  
Query: gi|251823469|dbj|AB488423.1| Aedes flavivirus gene for  
polyprotein (NS3-h region), partial cds, strain: Toyama-26

0 hits found  
BLASTN 2.2.28+  
Query: gi|251823467|dbj|AB488422.1| Aedes flavivirus gene for  
polyprotein (NS3-s region), partial cds, strain: Toyama-26

0 hits found  
BLASTN 2.2.28+  
Query: gi|251823461|dbj|AB488419.1| Aedes flavivirus gene for  
polyprotein (NS3-h region), partial cds, strain: Nagasaki-5

0 hits found  
BLASTN 2.2.28+  
Query: gi|251823459|dbj|AB488418.1| Aedes flavivirus gene for  
polyprotein (NS3-s region), partial cds, strain: Nagasaki-5

0 hits found  
12

BLASTN 2.2.28+

Query: gi|251823453|dbj|AB488415.1| Aedes flavivirus gene for polyprotein (NS3 region), partial cds, strain: Mie-16

0 hits found

BLASTN 2.2.28+

Query: gi|251823451|dbj|AB488414.1| Aedes flavivirus gene for polyprotein (NS3 region), partial cds, strain: Mie-16

0 hits found

BLASTN 2.2.28+

Query: gi|251823487|dbj|AB488432.1| Culex flavivirus gene for polyprotein (NS3-h region), partial cds, strain: Surabaya-2

0 hits found

BLASTN 2.2.28+

Query: gi|251823485|dbj|AB488431.1| Culex flavivirus gene for polyprotein (NS3-s region), partial cds, strain: Surabaya-2

0 hits found

BLASTN 2.2.28+

Query: gi|251823445|dbj|AB488411.1| Aedes flavivirus gene for polyprotein (NS3-h region), partial cds, strain: Narita-24

0 hits found

BLASTN 2.2.28+

Query: gi|251823443|dbj|AB488410.1| Aedes flavivirus gene for polyprotein (NS3-s region), partial cds, strain: Narita-24

0 hits found

BLASTN 2.2.28+

Query: gi|544185851|dbj|AB813754.1| Cell fusing agent virus E gene for envelope protein, partial cds, strain: E312\_08

0 hits found

BLASTN 2.2.28+

Query: gi|544185849|dbj|AB813753.1| Cell fusing agent virus E gene for envelope protein, partial cds, strain: E311\_08

0 hits found

BLASTN 2.2.28+

Query: gi|544185847|dbj|AB813752.1| Cell fusing agent virus E gene for envelope protein, partial cds, strain: E233\_08

0 hits found

BLASTN 2.2.28+

Query: gi|544185845|dbj|AB813751.1| Cell fusing agent virus E gene for envelope protein, partial cds, strain: E227\_08

0 hits found

BLASTN 2.2.28+

13

Query: gi|544185843|dbj|AB813750.1| Cell fusing agent virus E gene for envelope protein, partial cds, strain: E175\_08

0 hits found

BLASTN 2.2.28+

Query: gi|544185841|dbj|AB813749.1| Cell fusing agent virus E gene for envelope protein, partial cds, strain: E174\_08

0 hits found

BLASTN 2.2.28+

Query: gi|544185839|dbj|AB813748.1| Cell fusing agent virus E gene for envelope protein, partial cds, strain: E173\_08

0 hits found

BLASTN 2.2.28+

Query: gi|544185837|dbj|AB813747.1| Cell fusing agent virus E gene for envelope protein, partial cds, strain: E163\_08

0 hits found

BLASTN 2.2.28+

Query: gi|544185835|dbj|AB813746.1| Cell fusing agent virus E gene for envelope protein, partial cds, strain: E158\_08

0 hits found

BLASTN 2.2.28+

Query: gi|544185833|dbj|AB813745.1| Cell fusing agent virus E gene for envelope protein, partial cds, strain: E147\_08

0 hits found

BLASTN 2.2.28+

Query: gi|544185831|dbj|AB813744.1| Cell fusing agent virus E gene for envelope protein, partial cds, strain: E141\_08

0 hits found

BLASTN 2.2.28+

Query: gi|544185829|dbj|AB813743.1| Cell fusing agent virus E gene for envelope protein, partial cds, strain: E60\_12

0 hits found

BLASTN 2.2.28+



Query: gi|544185827|dbj|AB813742.1| Cell fusing agent virus E gene for envelope protein, partial cds, strain: E55\_12

0 hits found

BLASTN 2.2.28+

Query: gi|544185825|dbj|AB813741.1| Cell fusing agent virus E gene for envelope protein, partial cds, strain: E52\_12

0 hits found

BLASTN 2.2.28+

Query: gi|544185823|dbj|AB813740.1| Cell fusing agent virus E gene for envelope protein, partial cds, strain: E50\_12

14

0 hits found

BLASTN 2.2.28+

Query: gi|544185821|dbj|AB813739.1| Cell fusing agent virus E gene for envelope protein, partial cds, strain: E50\_08

0 hits found

BLASTN 2.2.28+

Query: gi|544185819|dbj|AB813738.1| Cell fusing agent virus E gene for envelope protein, partial cds, strain: E48\_12

0 hits found

BLASTN 2.2.28+

Query: gi|544185817|dbj|AB813737.1| Cell fusing agent virus E gene for envelope protein, partial cds, strain: E46\_12

0 hits found

BLASTN 2.2.28+

Query: gi|544185815|dbj|AB813736.1| Cell fusing agent virus E gene for envelope protein, partial cds, strain: E45\_12

0 hits found

BLASTN 2.2.28+

Query: gi|544185813|dbj|AB813735.1| Cell fusing agent virus E gene for envelope protein, partial cds, strain: E44\_12

0 hits found

BLASTN 2.2.28+

Query: gi|544185811|dbj|AB813734.1| Cell fusing agent virus E gene for envelope protein, partial cds, strain: E43\_12

0 hits found

BLASTN 2.2.28+

Query: gi|544185809|dbj|AB813733.1| Cell fusing agent virus E gene for envelope protein, partial cds, strain: E42\_08

0 hits found

BLASTN 2.2.28+

Query: gi|544185807|dbj|AB813732.1| Cell fusing agent virus E gene for envelope protein, partial cds, strain: E23\_12

0 hits found

BLASTN 2.2.28+

Query: gi|544185805|dbj|AB813731.1| Cell fusing agent virus E gene for envelope protein, partial cds, strain: E17\_12

0 hits found

BLASTN 2.2.28+

Query: gi|544185803|dbj|AB813730.1| Cell fusing agent virus E gene for envelope protein, partial cds, strain: E16\_12

0 hits found

15

BLASTN 2.2.28+

Query: gi|544185801|dbj|AB813729.1| Cell fusing agent virus E gene for envelope protein, partial cds, strain: E15\_12

0 hits found

BLASTN 2.2.28+

Query: gi|544185799|dbj|AB813728.1| Cell fusing agent virus E gene for envelope protein, partial cds, strain: E11\_12

0 hits found

BLASTN 2.2.28+

Query: gi|544185797|dbj|AB813727.1| Cell fusing agent virus E gene for envelope protein, partial cds, strain: E9\_12

0 hits found

BLASTN 2.2.28+

Query: gi|544185795|dbj|AB813726.1| Cell fusing agent virus E gene for envelope protein, partial cds, strain: E8\_12

0 hits found

BLASTN 2.2.28+

Query: gi|251823465|dbj|AB488421.1| Aedes flavivirus gene for polyprotein (E region), partial cds, strain: Toyama-26

0 hits found

BLASTN 2.2.28+

Query: gi|251823457|dbj|AB488417.1| Aedes flavivirus gene for polyprotein (E region), partial cds, strain: Nagasaki-5

0 hits found

BLASTN 2.2.28+

Query: gi|251823449|dbj|AB488413.1| Aedes flavivirus gene for polyprotein (E region), partial cds, strain: Mie-16

0 hits found

BLASTN 2.2.28+

Query: gi|251823441|dbj|AB488409.1| Aedes flavivirus gene for polyprotein (E region), partial cds, strain: Narita-24

0 hits found

BLASTN 2.2.28+

Query: gi|427379077|gb|JX860637.1| Aedes flavivirus strain A30 polymerase gene, partial cds

0 hits found

BLASTN 2.2.28+

Query: gi|427379075|gb|JX860636.1| Aedes flavivirus strain A22 polymerase gene, partial cds

0 hits found

BLASTN 2.2.28+

16  
Query: gi|427379073|gb|JX860635.1| Aedes flavivirus strain A14 polymerase gene, partial cds

0 hits found

BLASTN 2.2.28+

Query: gi|427379071|gb|JX860634.1| Aedes flavivirus strain A4 polymerase gene, partial cds

0 hits found

BLASTN 2.2.28+

Query: gi|9627242|ref|NC\_001564.1| Cell fusing agent virus, complete genome

0 hits found

BLASTN 2.2.28+

Query: gi|33620713|ref|NC\_005064.1| Kamiti River virus, complete genome

Fields: query id, subject id, % identity, alignment length,

mismatches, gap opens, q. start, q. end, s. start, s. end, evaluate,  
bit

score

3 hits found

gi|33620713|ref|NC\_005064.1| scaffold2646 74.07 1022 254 11  
8680 9696 174095 173080 1e-110 409

gi|33620713|ref|NC\_005064.1| scaffold8815 90.70 43 4 0  
1777 1819 41207 41249 6e-05 58.4

gi|33620713|ref|NC\_005064.1| scaffold4896 90.70 43 4 0  
1777 1819 132974 132932 6e-05 58.4

BLASTN 2.2.28+

Query: gi|30316448|gb|AY149904.1| Kamiti River virus isolate SR-75  
polyprotein precursor, gene, complete cds

Fields: query id, subject id, % identity, alignment length,  
mismatches, gap opens, q. start, q. end, s. start, s. end, evaluate,  
bit

score

3 hits found

gi|30316448|gb|AY149904.1| scaffold2646 73.78 1022 257 11 8680  
9696 174095 173080 1e-105 392

gi|30316448|gb|AY149904.1| scaffold8815 90.70 43 4 0 1777  
1819 41207 41249 6e-05 58.4

gi|30316448|gb|AY149904.1| scaffold4896 90.70 43 4 0 1777  
1819 132974 132932 6e-05 58.4

BLASTN 2.2.28+

Query: gi|30316441|gb|AY149905.1| Kamiti River virus isolate SR-82  
polyprotein precursor, gene, complete cds

Fields: query id, subject id, % identity, alignment length,  
mismatches, gap opens, q. start, q. end, s. start, s. end, evaluate,  
bit

score

3 hits found

gi|30316441|gb|AY149905.1| scaffold2646 74.07 1022 254 11 8680  
9696 174095 173080 1e-110 409

17  
gi|30316441|gb|AY149905.1| scaffold8815 90.70 43 4 0 1777  
1819 41207 41249 6e-05 58.4

gi|30316441|gb|AY149905.1| scaffold4896 90.70 43 4 0 1777  
1819 132974 132932 6e-05 58.4

BLASTN 2.2.28+

Query: gi|254688376|ref|NC\_012932.1| Aedes flavivirus genomic RNA,  
complete genome, strain: Narita-21

0 hits found

BLASTN 2.2.28+

Query: gi|251823439|dbj|AB488408.1| Aedes flavivirus genomic RNA, complete genome, strain: Narita-21

0 hits found

BLASTN 2.2.28+

Query: gi|480542369|gb|KC181923.1| Aedes flavivirus strain AEFVSPFLDMO-2011-MP6, complete genome

0 hits found

BLASTN 2.2.28+

Query: gi|440647090|dbj|AB701774.1| Culex flavivirus RNA, complete genome, strain: Toyama861

0 hits found

BLASTN 2.2.28+

Query: gi|440647088|dbj|AB701773.1| Culex flavivirus RNA, complete genome, strain: Toyama791

0 hits found

BLASTN 2.2.28+

Query: gi|440647086|dbj|AB701772.1| Culex flavivirus RNA, complete genome, strain: Toyama740

0 hits found

BLASTN 2.2.28+

Query: gi|440647084|dbj|AB701771.1| Culex flavivirus RNA, complete genome, strain: Toyama75

0 hits found

BLASTN 2.2.28+

Query: gi|440647082|dbj|AB701770.1| Culex flavivirus RNA, complete genome, strain: Toyama41

0 hits found

BLASTN 2.2.28+

Query: gi|440647080|dbj|AB701769.1| Culex flavivirus RNA, complete genome, strain: Toyama1849

0 hits found

BLASTN 2.2.28+

Query: gi|440647078|dbj|AB701768.1| Culex flavivirus RNA, complete genome, strain: Toyama1701

0 hits found  
BLASTN 2.2.28+  
Query: gi|440647076|dbj|AB701767.1| Culex flavivirus RNA, complete genome, strain: Toyama734

0 hits found  
BLASTN 2.2.28+  
Query: gi|440647074|dbj|AB701766.1| Culex flavivirus RNA, complete genome, strain: Toyama71

0 hits found  
BLASTN 2.2.28+  
Query: gi|440647094|dbj|AB701776.1| Culex flavivirus RNA, complete genome, strain: Toyama2627

0 hits found  
BLASTN 2.2.28+  
Query: gi|380851304|gb|JQ308190.1| Culex flavivirus isolate DG1007, complete genome

0 hits found  
BLASTN 2.2.28+  
Query: gi|380851302|gb|JQ308189.1| Culex flavivirus isolate DG1068, complete genome

0 hits found  
BLASTN 2.2.28+  
Query: gi|380851300|gb|JQ308188.1| Culex flavivirus isolate DG1064, complete genome

0 hits found  
BLASTN 2.2.28+  
Query: gi|380851298|gb|JQ308187.1| Culex flavivirus isolate HLD105, complete genome

0 hits found  
BLASTN 2.2.28+  
Query: gi|380851296|gb|JQ308186.1| Culex flavivirus isolate HLD102, complete genome

0 hits found

BLASTN 2.2.28+  
Query: gi|247893526|gb|FJ663034.1| Culex flavivirus isolate Iowa07,  
complete genome

0 hits found  
BLASTN 2.2.28+  
Query: gi|219944306|gb|FJ502995.1| Culex flavivirus strain HOU24518,  
complete genome

0 hits found  
19  
BLASTN 2.2.28+  
Query: gi|166159177|ref|NC\_008604.2| Culex flavivirus, complete genome

0 hits found  
BLASTN 2.2.28+  
Query: gi|215274030|gb|EU879060.1| Culex flavivirus strain CxFVMex07,  
complete genome

0 hits found  
BLASTN 2.2.28+  
Query: gi|229904919|ref|NC\_012671.1| Quang Binh virus, complete genome

0 hits found  
BLASTN 2.2.28+  
Query: gi|229270300|gb|FJ644291.1| Quang Binh virus isolate VN180,  
complete genome

0 hits found  
BLASTN 2.2.28+  
Query: gi|226374362|gb|AY632535.2| Zika virus strain MR 766,  
complete genome

0 hits found  
BLASTN 2.2.28+  
Query: gi|62421411|gb|AY898809.1| Alfuy virus strain MRM3929,  
complete genome

0 hits found  
BLASTN 2.2.28+  
Query: gi|226374363|gb|AY632536.4| Bussuquara virus strain BeAn

4073, complete genome

0 hits found

BLASTN 2.2.28+

Query: gi|54287947|gb|AY762084.1| Dengue virus type 1 strain  
Singapore 8114/93, complete genome

Fields: query id, subject id, % identity, alignment length,  
mismatches, gap opens, q. start, q. end, s. start, s. end, evaluate,  
bit

score

5 hits found

gi|54287947|gb|AY762084.1| scaffold15182 91.41 5702 490 0 2014  
7715 9396 15097 0.0 7816

gi|54287947|gb|AY762084.1| scaffold15182 92.65 3131 223 5 7610  
10733 15088 18218 0.0 4501

gi|54287947|gb|AY762084.1| scaffold15182 92.31 2120 155 4 1  
2113 7279 9397 0.0 3005

gi|54287947|gb|AY762084.1| scaffold15182 92.60 1445 107 0 7623  
9067 102 1546 0.0 2076

20

gi|54287947|gb|AY762084.1| scaffold15182 92.78 97 7 0 2016  
2112 1 97 5e-30 141

BLASTN 2.2.28+

Query: gi|1854036|gb|U88535.1|DVU88535 Dengue virus type 1 clone  
WestPac, complete genome

Fields: query id, subject id, % identity, alignment length,  
mismatches, gap opens, q. start, q. end, s. start, s. end, evaluate,  
bit

score

5 hits found

gi|1854036|gb|U88535.1|DVU88535 scaffold15182 92.81 5702 410 0  
2016 7717 9396 15097 0.0 8259

gi|1854036|gb|U88535.1|DVU88535 scaffold15182 93.69 3121 192 4  
7620 10735 15098 18218 0.0 4667

gi|1854036|gb|U88535.1|DVU88535 scaffold15182 93.83 2122 125 2  
1 2116 7277 9398 0.0 3188

gi|1854036|gb|U88535.1|DVU88535 scaffold15182 93.80 1451 90 0  
7620 9070 97 1547 0.0 2182

gi|1854036|gb|U88535.1|DVU88535 scaffold15182 92.78 97 7 0  
2018 2114 1 97 5e-30 141

BLASTN 2.2.28+

Query: gi|56809013|gb|AY702040.1| Dengue virus type 2 strain  
I348600, complete genome



Fields: query id, subject id, % identity, alignment length,  
mismatches, gap opens, q. start, q. end, s. start, s. end, evalue,  
bit

score

2 hits found

gi|56809013|gb|AY702040.1| scaffold172623 92.78 568 41 0 389  
956 679 112 0.0 822

gi|56809013|gb|AY702040.1| scaffold15182 83.54 401 50 12 10279  
10675 17802 18190 4e-96 361

BLASTN 2.2.28+

Query: gi|77024326|gb|DQ181799.1| Dengue virus type 2 strain  
ThD2\_0017\_98, complete genome

Fields: query id, subject id, % identity, alignment length,  
mismatches, gap opens, q. start, q. end, s. start, s. end, evalue,  
bit

score

2 hits found

gi|77024326|gb|DQ181799.1| scaffold15182 74.47 3118 679 95 7671  
10723 15153 18218 0.0 1240

gi|77024326|gb|DQ181799.1| scaffold172623 94.88 566 29 0 400  
965 679 114 0.0 885

BLASTN 2.2.28+

Query: gi|145413601|gb|AY858044.2| Dengue virus 3 strain KJ71,  
complete genome

Fields: query id, subject id, % identity, alignment length,  
mismatches, gap opens, q. start, q. end, s. start, s. end, evalue,  
bit

score

2 hits found

21  
gi|145413601|gb|AY858044.2| scaffold15182 76.52 3101 632 76 7667  
10707 15154 18218 0.0 1605

gi|145413601|gb|AY858044.2| scaffold15182 74.72 2140 493 42 1  
2110 7277 9398 0.0 911

BLASTN 2.2.28+

Query: gi|58200446|gb|AY744685.1| Dengue virus type 3 isolate  
PF94/136116, complete genome

Fields: query id, subject id, % identity, alignment length,  
mismatches, gap opens, q. start, q. end, s. start, s. end, evalue,  
bit

score

2 hits found

gi|58200446|gb|AY744685.1| scaffold15182 76.82 3097 630 71 7667

10707 15154 18218 0.0 1661  
gi|58200446|gb|AY744685.1| scaffold15182 74.91 2144 482 46 1  
2110 7277 9398 0.0 928  
BLASTN 2.2.28+  
Query: gi|145413606|gb|AY858047.2| Dengue virus 3 strain TB16,  
complete genome

Fields: query id, subject id, % identity, alignment length,  
mismatches, gap opens, q. start, q. end, s. start, s. end, evaluate,  
bit  
score

2 hits found  
gi|145413606|gb|AY858047.2| scaffold15182 76.32 3083 632 81 7667  
10688 15154 18199 0.0 1559  
gi|145413606|gb|AY858047.2| scaffold15182 74.35 2140 501 42 1  
2110 7277 9398 0.0 867  
BLASTN 2.2.28+  
Query: gi|54287949|gb|AY762085.1| Dengue virus type 4 strain  
Singapore 8976/95, complete genome

Fields: query id, subject id, % identity, alignment length,  
mismatches, gap opens, q. start, q. end, s. start, s. end, evaluate,  
bit  
score

2 hits found  
gi|54287949|gb|AY762085.1| scaffold15182 82.56 344 37 17 10311  
10649 17893 18218 3e-72 281  
gi|54287949|gb|AY762085.1| scaffold172623 72.71 436 106 9 410  
839 670 242 9e-28 134  
BLASTN 2.2.28+  
Query: gi|53653742|gb|AY618988.1| Dengue virus type 4 strain  
ThD4\_0476\_97, complete genome

Fields: query id, subject id, % identity, alignment length,  
mismatches, gap opens, q. start, q. end, s. start, s. end, evaluate,  
bit  
score

1 hits found  
gi|53653742|gb|AY618988.1| scaffold15182 82.03 345 38 17 10314  
10653 17893 18218 2e-69 272  
BLASTN 2.2.28+  
22  
Query: gi|9626460|ref|NC\_001437.1| Japanese encephalitis virus,  
genome

Fields: query id, subject id, % identity, alignment length,

mismatches, gap opens, q. start, q. end, s. start, s. end, evaluate,  
bit  
score

1 hits found  
gi|9626460|ref|NC\_001437.1| scaffold15182 96.88 32 0 1 10740  
10770 18066 18097 0.003 52.8  
BLASTN 2.2.28+  
Query: gi|331329|gb|M18370.1|JEVCG Japanese encephalitis virus  
(strain JaOArS982), complete genome

Fields: query id, subject id, % identity, alignment length,  
mismatches, gap opens, q. start, q. end, s. start, s. end, evaluate,  
bit  
score

1 hits found  
gi|331329|gb|M18370.1|JEVCG scaffold15182 96.88 32 0 1 10740  
10770 18066 18097 0.003 52.8  
BLASTN 2.2.28+  
Query: gi|6970067|gb|AF221499.1| Japanese encephalitis virus  
isolate  
CH2195LA, complete genome

Fields: query id, subject id, % identity, alignment length,  
mismatches, gap opens, q. start, q. end, s. start, s. end, evaluate,  
bit  
score

1 hits found  
gi|6970067|gb|AF221499.1| scaffold15182 89.13 46 3 2 10740  
10783 18066 18111 2e-04 56.5  
BLASTN 2.2.28+  
Query: gi|81687252|dbj|AB241119.1| Japanese encephalitis virus  
genomic RNA, complete genome, strain: JEV/sw/Mie/41/2002

Fields: query id, subject id, % identity, alignment length,  
mismatches, gap opens, q. start, q. end, s. start, s. end, evaluate,  
bit  
score

1 hits found  
gi|81687252|dbj|AB241119.1| scaffold15182 96.88 32 0 1 10728  
10758 18066 18097 0.003 52.8  
BLASTN 2.2.28+  
Query: gi|56744202|dbj|AB196925.1| Japanese encephalitis virus  
genomic RNA, complete genome, clone:JEV-rAT

Fields: query id, subject id, % identity, alignment length,  
mismatches, gap opens, q. start, q. end, s. start, s. end, evaluate,

bit

score

1 hits found

gi|56744202|dbj|AB196925.1| scaffold15182 96.88 32 0 1 10741

10771 18066 18097 0.003 52.8

BLASTN 2.2.28+

Query: gi|119067955|gb|EF107523.1| Japanese encephalitis virus strain WHe, complete genome

23

Fields: query id, subject id, % identity, alignment length, mismatches, gap opens, q. start, q. end, s. start, s. end, evalue, bit

score

1 hits found

gi|119067955|gb|EF107523.1| scaffold15182 96.88 32 0 1 10740

10770 18066 18097 0.003 52.8

BLASTN 2.2.28+

Query: gi|226374366|gb|AY632540.2| Kedougou virus strain DakAar D1470, complete genome

0 hits found

BLASTN 2.2.28+

Query: gi|226374367|gb|AY632541.4| Kokobera virus strain AusMRM 32,

complete genome

0 hits found

BLASTN 2.2.28+

Query: gi|294719514|ref|NC\_009029.2| Kokobera virus, complete genome

0 hits found

BLASTN 2.2.28+

Query: gi|6175826|gb|AF161266.1| Murray Valley encephalitis virus strain MVE-1-51, complete genome

0 hits found

BLASTN 2.2.28+

Query: gi|226534288|gb|AY632542.4| Rocio virus strain SPH 34675, complete genome

0 hits found

BLASTN 2.2.28+

Query: gi|109692178|gb|DQ525916.1| St. Louis encephalitis virus strain Kern217, complete genome

Fields: query id, subject id, % identity, alignment length,  
mismatches, gap opens, q. start, q. end, s. start, s. end, evalue,  
bit

score

1 hits found

gi|109692178|gb|DQ525916.1| scaffold15182 83.61 61 6 4 10681

10738 18038 18097 7e-04 54.7

BLASTN 2.2.28+

Query: gi|45378907|gb|AY453411.1| Usutu virus strain Vienna 2001  
from Austria, complete genome

0 hits found

BLASTN 2.2.28+

Query: gi|56692441|ref|NC\_006551.1| Usutu virus, complete genome

0 hits found

BLASTN 2.2.28+

24

Query: gi|45378909|gb|AY453412.1| Usutu virus strain SAAR-1776  
from

South Africa, complete genome

0 hits found

BLASTN 2.2.28+

Query: gi|83699610|gb|DQ256376.1| West Nile virus strain 804994,  
complete genome

0 hits found

BLASTN 2.2.28+

Query: gi|30349729|gb|AY278441.1| West Nile virus isolate  
Ast99-901,  
complete genome

0 hits found

BLASTN 2.2.28+

Query: gi|84028434|gb|DQ318020.1| West Nile virus strain  
ArB3573/82,  
complete genome

0 hits found

BLASTN 2.2.28+

Query: gi|9930135|gb|AF260968.1| West Nile virus strain Eg101,  
complete genome

0 hits found

BLASTN 2.2.28+  
Query: gi|73913543|gb|DQ116961.1| West Nile virus isolate goshawk-Hungary/04, complete genome

0 hits found  
BLASTN 2.2.28+  
Query: gi|89148117|gb|DQ118127.1| West Nile virus isolate goose-Hungary/03, complete genome

0 hits found  
BLASTN 2.2.28+  
Query: gi|30349725|gb|AY277251.1| West Nile virus isolate LEIVKrnd88-190, complete genome

0 hits found  
BLASTN 2.2.28+  
Query: gi|30349731|gb|AY278442.1| West Nile virus isolate LEIVVlg00-27924, complete genome

0 hits found  
BLASTN 2.2.28+  
Query: gi|58702120|gb|AY765264.1| West Nile virus strain Rabensburg isolate 97-103, complete genome

0 hits found  
BLASTN 2.2.28+  
Query: gi|51095221|gb|AY688948.1| West Nile virus strain Sarafend, complete genome  
25

0 hits found  
BLASTN 2.2.28+  
Query: gi|9627244|ref|NC\_002031.1| Yellow fever virus, complete genome

0 hits found  
BLASTN 2.2.28+  
Query: gi|63147726|gb|AY968064.1| Yellow fever virus strain Angola71, complete genome

0 hits found  
BLASTN 2.2.28+  
Query: gi|63147728|gb|AY968065.1| Yellow fever virus strain

Uganda48a, complete genome

0 hits found

BLASTN 2.2.28+

Query: gi|226374364|gb|AY632538.4| Iguape virus strain SPAn 71686,  
complete genome

0 hits found

BLASTN 2.2.28+

Query: gi|22474435|emb|AJ299445.1| Montana myotis  
leukoencephalitis  
virus complete genomic RNA

0 hits found

BLASTN 2.2.28+

Query: gi|20178608|ref|NC\_003675.1| Rio Bravo virus, genome

0 hits found

BLASTN 2.2.28+

Query: gi|383215103|gb|JQ582840.1| Rio Bravo virus strain M64,  
complete genome

0 hits found

BLASTN 2.2.28+

Query: gi|82791368|gb|DQ235145.1| Gadgets Gully virus from  
Australia  
polyprotein gene, complete cds

Fields: query id, subject id, % identity, alignment length,  
mismatches, gap opens, q. start, q. end, s. start, s. end, evalue,  
bit

score

2 hits found

gi|82791368|gb|DQ235145.1| scaffold15182 80.82 146 26 2 8889  
9033 1394 1538 1e-21 113

gi|82791368|gb|DQ235145.1| scaffold15182 80.82 146 26 2 8889  
9033 16395 16539 1e-21 113

BLASTN 2.2.28+

Query: gi|82791370|gb|DQ235146.1| Kadam virus from Uganda  
polyprotein gene, complete cds

26

0 hits found

BLASTN 2.2.28+

Query: gi|92090928|gb|DQ462443.1| Karshi virus strain LEIV-7192  
Tur,

complete genome

0 hits found

BLASTN 2.2.28+

Query: gi|20260781|ref|NC\_003690.1| Langat virus, complete genome

0 hits found

BLASTN 2.2.28+

Query: gi|33589253|ref|NC\_005062.1| Omsk hemorrhagic fever virus, complete genome

0 hits found

BLASTN 2.2.28+

Query: gi|33520436|gb|AY193805.1| Omsk hemorrhagic fever virus strain Bogoluvovska, complete genome

0 hits found

BLASTN 2.2.28+

Query: gi|41019254|gb|AY438626.1| Omsk hemorrhagic fever virus strain Kubrin, complete genome

0 hits found

BLASTN 2.2.28+

Query: gi|20260779|ref|NC\_003687.1| Powassan virus, complete genome

0 hits found

BLASTN 2.2.28+

Query: gi|300834854|gb|HM440563.1| Powassan virus strain 64-7062 isolate POWANY64, complete genome

0 hits found

BLASTN 2.2.28+

Query: gi|300834852|gb|HM440562.1| Powassan virus isolate DTWViC08, complete genome

0 hits found

BLASTN 2.2.28+

Query: gi|300834846|gb|HM440559.1| Powassan virus strain NFS001 isolate DTVMa96, complete genome

0 hits found

BLASTN 2.2.28+

Query: gi|345294801|gb|HQ231415.1| Powassan virus strain Ternay, complete genome



0 hits found  
BLASTN 2.2.28+  
Query: gi|345294799|gb|HQ231414.1| Powassan virus strain Ulysses,  
complete genome  
27

0 hits found  
BLASTN 2.2.28+  
Query: gi|300834844|gb|HM440558.1| Powassan virus strain wicf9901  
isolate DTVWi99, complete genome

0 hits found  
BLASTN 2.2.28+  
Query: gi|9628431|ref|NC\_001672.1| Tick-borne encephalitis virus,  
complete genome

0 hits found  
BLASTN 2.2.28+  
Query: gi|30385207|gb|AY217093.1| Tick-borne encephalitis virus  
strain MDJ-01 nonfunctional polyprotein gene, complete sequence

0 hits found  
BLASTN 2.2.28+  
Query: gi|21397174|ref|NC\_003996.1| Tamana bat virus, genome

0 hits found  
BLASTN 2.2.28+  
Query: gi|33285930|gb|AY223845.1| Aedes albopictus containing  
putative integrated non-retroviral sequence

Fields: query id, subject id, % identity, alignment length,  
mismatches, gap opens, q. start, q. end, s. start, s. end, evaluate,  
bit

score

312 hits found

gi|33285930|gb|AY223845.1| scaffold14636 97.81 1826 21 10 1  
1809 23296 25119 0.0 3133

gi|33285930|gb|AY223845.1| scaffold14636 99.40 498 3 0 1861  
2358 25490 25987 0.0 904

gi|33285930|gb|AY223845.1| scaffold14636 98.99 198 1 1 1  
197 13008 13205 2e-94 353

gi|33285930|gb|AY223845.1| scaffold1523 95.24 1534 52 14 1234  
2757 251369 249847 0.0 2409

gi|33285930|gb|AY223845.1| scaffold1523 97.12 555 14 2 1443  
1996 244685 244132 0.0 935

gi|33285930|gb|AY223845.1| scaffold1523 100.00 62 0 0  
1234 1295 245024 244963 8e-23 115  
gi|33285930|gb|AY223845.1| scaffold3775 90.96 1360 80 26 1420  
2757 157136 158474 0.0 1790  
gi|33285930|gb|AY223845.1| scaffold3775 98.68 151 2 0 1234  
1384 156987 157137 6e-69 268  
gi|33285930|gb|AY223845.1| scaffold1511 88.52 1342 108 32 1445  
2757 210159 208835 0.0 1583  
gi|33285930|gb|AY223845.1| scaffold1511 98.98 98 1 0 1234  
1331 210314 210217 4e-41 176  
gi|33285930|gb|AY223845.1| scaffold2856 94.23 1022 38 11 1420  
2423 8994 7976 0.0 1541  
28  
gi|33285930|gb|AY223845.1| scaffold2856 86.30 781 42 37 1233  
1996 2037 1305 0.0 789  
gi|33285930|gb|AY223845.1| scaffold2856 100.00 152 0 0  
1233 1384 9144 8993 8e-73 281  
gi|33285930|gb|AY223845.1| scaffold136807 99.29 840 6 0 1804  
2643 1 840 0.0 1519  
gi|33285930|gb|AY223845.1| scaffold21517 88.06 1198 95 33 1454  
2620 1181 1 0.0 1376  
gi|33285930|gb|AY223845.1| scaffold21517 100.00 211 0 0  
2547 2757 6464 6254 1e-105 390  
gi|33285930|gb|AY223845.1| scaffold21517 96.69 151 5 0 1234  
1384 1445 1295 6e-64 252  
gi|33285930|gb|AY223845.1| scaffold44212 91.78 985 51 16 1785  
2757 1687 721 0.0 1343  
gi|33285930|gb|AY223845.1| scaffold116789 91.47 868 58 10 1846  
2707 7 864 0.0 1179  
gi|33285930|gb|AY223845.1| scaffold148875 92.35 824 49 8 1914  
2732 816 2 0.0 1160  
gi|33285930|gb|AY223845.1| scaffold14318 87.45 781 43 34 1233  
1996 10830 11572 0.0 848  
gi|33285930|gb|AY223845.1| scaffold333 92.18 588 28 16 1420  
1996 147929 147349 0.0 815  
gi|33285930|gb|AY223845.1| scaffold333 99.00 100 1 0 1262  
1361 148491 148392 3e-42 180  
gi|33285930|gb|AY223845.1| scaffold333 100.00 38 0 0  
1233 1270 148961 148924 2e-09 71.3  
gi|33285930|gb|AY223845.1| scaffold333 89.80 49 4 1 1353  
1400 147959 147911 1e-06 62.1  
gi|33285930|gb|AY223845.1| scaffold93922 99.30 431 3 0 2327  
2757 1 431 0.0 780  
gi|33285930|gb|AY223845.1| scaffold5734 90.72 582 40 11 1420  
1996 96686 97258 0.0 763  
gi|33285930|gb|AY223845.1| scaffold5734 99.34 152 1 0 1233

1384 96536 96687 4e-71 276  
gi|33285930|gb|AY223845.1| scaffold714 90.31 588 35 16 1420  
1996 111579 112155 0.0 750  
gi|33285930|gb|AY223845.1| scaffold714 96.67 120 4 0 1259  
1378 111300 111419 2e-48 200  
gi|33285930|gb|AY223845.1| scaffold819 88.57 586 53 11 1420  
1996 201147 200567 0.0 699  
gi|33285930|gb|AY223845.1| scaffold819 92.16 153 3 3 1241  
1384 201298 201146 1e-50 207  
gi|33285930|gb|AY223845.1| scaffold78997 97.26 402 9 1 1420  
1821 552 951 0.0 680  
gi|33285930|gb|AY223845.1| scaffold78997 100.00 151 0 0  
1234 1384 403 553 3e-72 279  
gi|33285930|gb|AY223845.1| scaffold324 87.50 584 52 19 1426  
1996 82788 83363 0.0 654  
gi|33285930|gb|AY223845.1| scaffold324 92.67 150 11 0 1234  
1383 82638 82787 2e-53 217  
gi|33285930|gb|AY223845.1| scaffold2327 90.45 492 31 14 1516  
1996 5952 6438 5e-179 634  
29  
gi|33285930|gb|AY223845.1| scaffold5883 83.59 585 61 28 1445  
2002 110300 110876 2e-143 516  
gi|33285930|gb|AY223845.1| scaffold74688 83.71 577 61 26 1445  
1996 806 238 7e-143 514  
gi|33285930|gb|AY223845.1| scaffold74688 94.96 139 1 2 1234  
1366 971 833 3e-52 213  
gi|33285930|gb|AY223845.1| scaffold3004 83.71 577 61 26 1445  
1996 28846 28278 7e-143 514  
gi|33285930|gb|AY223845.1| scaffold277 84.52 504 34 30 1420  
1910 523312 522840 3e-126 459  
gi|33285930|gb|AY223845.1| scaffold277 93.38 151 2 4 1234  
1384 523453 523311 2e-53 217  
gi|33285930|gb|AY223845.1| scaffold277 96.77 93 3 0 1904  
1996 519247 519155 5e-35 156  
gi|33285930|gb|AY223845.1| scaffold124230 99.59 246 1 0 1139  
1384 576 821 2e-123 449  
gi|33285930|gb|AY223845.1| scaffold216788 96.02 251 8 2 1513  
1762 1 250 1e-110 407  
gi|33285930|gb|AY223845.1| scaffold13247 86.44 376 31 14 1638  
1996 23198 23570 1e-106 394  
gi|33285930|gb|AY223845.1| scaffold6332 95.69 232 9 1 1765  
1996 36478 36708 5e-100 372  
gi|33285930|gb|AY223845.1| scaffold6332 98.59 142 2 0 1243  
1384 35782 35923 6e-64 252  
gi|33285930|gb|AY223845.1| scaffold1863 100.00 194 0 0  
1 194 45479 45286 4e-96 359

gi|33285930|gb|AY223845.1| scaffold1863 93.94 198 0 4 1  
197 54103 53917 5e-75 289  
gi|33285930|gb|AY223845.1| scaffold1762 100.00 193 0 0  
1 193 41282 41474 1e-95 357  
gi|33285930|gb|AY223845.1| scaffold1762 99.44 178 1 0 16  
193 51711 51888 1e-85 324  
gi|33285930|gb|AY223845.1| scaffold4278 98.99 198 1 1 1  
197 150850 151047 2e-94 353  
gi|33285930|gb|AY223845.1| scaffold4062 99.48 193 1 0 1  
193 92226 92418 6e-94 351  
gi|33285930|gb|AY223845.1| scaffold5171 98.89 180 2 0 1817  
1996 129015 128836 5e-85 322  
gi|33285930|gb|AY223845.1| scaffold5171 100.00 42 0 0  
1234 1275 129793 129752 1e-11 78.7  
gi|33285930|gb|AY223845.1| scaffold145736 96.37 193 7 0 2428  
2620 639 831 6e-84 318  
gi|33285930|gb|AY223845.1| scaffold88802 86.67 285 32 5 1420  
1700 637 919 1e-81 311  
gi|33285930|gb|AY223845.1| scaffold88802 95.54 157 1 2 1234  
1384 482 638 3e-62 246  
gi|33285930|gb|AY223845.1| scaffold248778 95.83 192 6 1 1420  
1609 14 205 4e-81 309  
gi|33285930|gb|AY223845.1| scaffold154816 98.30 176 3 0 1420  
1595 176 1 4e-81 309  
gi|33285930|gb|AY223845.1| scaffold154816 100.00 72 0 0  
1234 1305 356 285 2e-28 134  
30  
gi|33285930|gb|AY223845.1| scaffold154816 89.80 49 4 1 1353  
1400 206 158 1e-06 62.1  
gi|33285930|gb|AY223845.1| scaffold150541 100.00 158 0 0  
23 180 826 669 4e-76 292  
gi|33285930|gb|AY223845.1| scaffold110427 88.28 239 22 5 1420  
1654 250 14 8e-73 281  
gi|33285930|gb|AY223845.1| scaffold110427 96.69 151 5 0 1234  
1384 399 249 6e-64 252  
gi|33285930|gb|AY223845.1| scaffold221653 88.94 235 15 6 2125  
2356 227 1 3e-72 279  
gi|33285930|gb|AY223845.1| scaffold144374 100.00 151 0 0  
1234 1384 218 368 3e-72 279  
gi|33285930|gb|AY223845.1| scaffold144374 84.15 265 24 15 1592  
1845 536 793 1e-60 241  
gi|33285930|gb|AY223845.1| scaffold662003 98.68 151 2 0 1234  
1384 171 21 6e-69 268  
gi|33285930|gb|AY223845.1| scaffold4117 97.35 151 4 0 1234  
1384 3038 3188 1e-65 257  
gi|33285930|gb|AY223845.1| scaffold5421 92.00 150 12 0 1234

1383 131579 131430 1e-51 211  
gi|33285930|gb|AY223845.1| scaffold203 92.00 150 12 0 1234  
1383 130903 130754 1e-51 211  
gi|33285930|gb|AY223845.1| scaffold21419 78.36 365 48 26 1503  
1852 4175 3827 1e-50 207  
gi|33285930|gb|AY223845.1| scaffold1553 78.08 365 49 26 1503  
1852 26029 26377 6e-49 202  
gi|33285930|gb|AY223845.1| scaffold2388 98.97 97 1 0 1264  
1360 228498 228594 1e-40 174  
gi|33285930|gb|AY223845.1| scaffold2388 97.44 39 1 0 1230  
1268 228213 228251 2e-08 67.6  
gi|33285930|gb|AY223845.1| scaffold474093 97.96 98 2 0 1233  
1330 98 1 2e-39 171  
gi|33285930|gb|AY223845.1| scaffold13930 92.98 114 7 1 85  
197 15485 15372 8e-38 165  
gi|33285930|gb|AY223845.1| scaffold897 100.00 36 0 0  
1384 1419 74945 74980 2e-08 67.6  
gi|33285930|gb|AY223845.1| scaffold553385 94.74 38 1 1 1372  
1409 86 122 1e-05 58.4  
gi|33285930|gb|AY223845.1| scaffold7392 94.74 38 1 1 1372  
1409 16399 16435 1e-05 58.4  
gi|33285930|gb|AY223845.1| scaffold551940 96.88 32 1 0 1378  
1409 99 68 2e-04 54.7  
gi|33285930|gb|AY223845.1| scaffold20841 100.00 29 0 0  
1381 1409 3752 3780 2e-04 54.7  
gi|33285930|gb|AY223845.1| scaffold16141 100.00 29 0 0  
1381 1409 4425 4453 2e-04 54.7  
gi|33285930|gb|AY223845.1| scaffold6266 100.00 29 0 0  
1381 1409 22839 22811 2e-04 54.7  
gi|33285930|gb|AY223845.1| scaffold5635 96.88 32 1 0 1378  
1409 84234 84265 2e-04 54.7  
gi|33285930|gb|AY223845.1| scaffold2195 100.00 29 0 0  
1381 1409 144720 144748 2e-04 54.7  
31  
gi|33285930|gb|AY223845.1| scaffold1903 100.00 29 0 0  
1381 1409 114379 114351 2e-04 54.7  
gi|33285930|gb|AY223845.1| scaffold1519 100.00 29 0 0  
1381 1409 284888 284860 2e-04 54.7  
gi|33285930|gb|AY223845.1| scaffold1063 100.00 29 0 0  
1381 1409 77676 77704 2e-04 54.7  
gi|33285930|gb|AY223845.1| scaffold750 100.00 29 0 0  
1381 1409 194471 194443 2e-04 54.7  
gi|33285930|gb|AY223845.1| scaffold142 100.00 29 0 0  
1381 1409 543835 543807 2e-04 54.7  
gi|33285930|gb|AY223845.1| scaffold142 100.00 28 0 0  
1382 1409 494420 494393 7e-04 52.8

gi|33285930|gb|AY223845.1| scaffold47 100.00 29 0 0 1381  
1409 736764 736792 2e-04 54.7  
gi|33285930|gb|AY223845.1| scaffold605345 100.00 28 0 0  
1382 1409 95 122 7e-04 52.8  
gi|33285930|gb|AY223845.1| scaffold603936 100.00 28 0 0  
1382 1409 94 121 7e-04 52.8  
gi|33285930|gb|AY223845.1| scaffold598245 100.00 28 0 0  
1382 1409 93 120 7e-04 52.8  
gi|33285930|gb|AY223845.1| scaffold584769 100.00 28 0 0  
1382 1409 117 144 7e-04 52.8  
gi|33285930|gb|AY223845.1| scaffold564617 100.00 28 0 0  
1382 1409 94 67 7e-04 52.8  
gi|33285930|gb|AY223845.1| scaffold542501 100.00 28 0 0  
1382 1409 95 122 7e-04 52.8  
gi|33285930|gb|AY223845.1| scaffold221732 100.00 28 0 0  
1382 1409 93 66 7e-04 52.8  
gi|33285930|gb|AY223845.1| scaffold56607 100.00 28 0 0  
1382 1409 677 650 7e-04 52.8  
gi|33285930|gb|AY223845.1| scaffold34745 100.00 28 0 0  
1382 1409 1939 1966 7e-04 52.8  
gi|33285930|gb|AY223845.1| scaffold28982 100.00 28 0 0  
1382 1409 1954 1981 7e-04 52.8  
gi|33285930|gb|AY223845.1| scaffold596054 100.00 28 0 0  
1382 1409 91 64 7e-04 52.8  
gi|33285930|gb|AY223845.1| scaffold580164 100.00 28 0 0  
1382 1409 94 67 7e-04 52.8  
gi|33285930|gb|AY223845.1| scaffold558043 100.00 28 0 0  
1382 1409 95 122 7e-04 52.8  
gi|33285930|gb|AY223845.1| scaffold535182 100.00 28 0 0  
1382 1409 95 122 7e-04 52.8  
gi|33285930|gb|AY223845.1| scaffold244388 100.00 28 0 0  
1382 1409 115 142 7e-04 52.8  
gi|33285930|gb|AY223845.1| scaffold92590 100.00 28 0 0  
1382 1409 643 616 7e-04 52.8  
gi|33285930|gb|AY223845.1| scaffold66722 100.00 28 0 0  
1382 1409 1175 1202 7e-04 52.8  
gi|33285930|gb|AY223845.1| scaffold51893 100.00 28 0 0  
1382 1409 702 729 7e-04 52.8  
gi|33285930|gb|AY223845.1| scaffold31294 100.00 28 0 0  
1382 1409 218 245 7e-04 52.8  
32  
gi|33285930|gb|AY223845.1| scaffold15679 100.00 28 0 0  
1382 1409 20332 20359 7e-04 52.8  
gi|33285930|gb|AY223845.1| scaffold15466 100.00 28 0 0  
1382 1409 9585 9612 7e-04 52.8  
gi|33285930|gb|AY223845.1| scaffold15245 100.00 28 0 0

1382 1409 14976 14949 7e-04 52.8  
gi|33285930|gb|AY223845.1| scaffold15116 100.00 28 0 0  
1382 1409 4449 4476 7e-04 52.8  
gi|33285930|gb|AY223845.1| scaffold14968 100.00 28 0 0  
1382 1409 13740 13713 7e-04 52.8  
gi|33285930|gb|AY223845.1| scaffold14839 100.00 28 0 0  
1382 1409 5546 5519 7e-04 52.8  
gi|33285930|gb|AY223845.1| scaffold14401 100.00 28 0 0  
1382 1409 13546 13519 7e-04 52.8  
gi|33285930|gb|AY223845.1| scaffold14161 100.00 28 0 0  
1382 1409 2077 2050 7e-04 52.8  
gi|33285930|gb|AY223845.1| scaffold14046 100.00 28 0 0  
1382 1409 29710 29683 7e-04 52.8  
gi|33285930|gb|AY223845.1| scaffold13630 100.00 28 0 0  
1382 1409 4617 4590 7e-04 52.8  
gi|33285930|gb|AY223845.1| scaffold12987 100.00 28 0 0  
1382 1409 19546 19573 7e-04 52.8  
gi|33285930|gb|AY223845.1| scaffold12560 100.00 28 0 0  
1382 1409 9384 9357 7e-04 52.8  
gi|33285930|gb|AY223845.1| scaffold12059 100.00 28 0 0  
1382 1409 34353 34380 7e-04 52.8  
gi|33285930|gb|AY223845.1| scaffold11899 100.00 28 0 0  
1382 1409 22111 22084 7e-04 52.8  
gi|33285930|gb|AY223845.1| scaffold11603 100.00 28 0 0  
1382 1409 19041 19068 7e-04 52.8  
gi|33285930|gb|AY223845.1| scaffold11389 100.00 28 0 0  
1382 1409 3570 3597 7e-04 52.8  
gi|33285930|gb|AY223845.1| scaffold11237 100.00 28 0 0  
1382 1409 38819 38846 7e-04 52.8  
gi|33285930|gb|AY223845.1| scaffold11143 100.00 28 0 0  
1382 1409 41777 41750 7e-04 52.8  
gi|33285930|gb|AY223845.1| scaffold11047 100.00 28 0 0  
1382 1409 677 650 7e-04 52.8  
gi|33285930|gb|AY223845.1| scaffold11047 100.00 28 0 0  
1382 1409 3028 3055 7e-04 52.8  
gi|33285930|gb|AY223845.1| scaffold10933 100.00 28 0 0  
1382 1409 9340 9367 7e-04 52.8  
gi|33285930|gb|AY223845.1| scaffold10667 100.00 28 0 0  
1382 1409 3407 3434 7e-04 52.8  
gi|33285930|gb|AY223845.1| scaffold10530 100.00 28 0 0  
1382 1409 18346 18373 7e-04 52.8  
gi|33285930|gb|AY223845.1| scaffold10185 100.00 28 0 0  
1382 1409 40570 40597 7e-04 52.8  
gi|33285930|gb|AY223845.1| scaffold10006 100.00 28 0 0  
1382 1409 2112 2085 7e-04 52.8  
gi|33285930|gb|AY223845.1| scaffold9986 100.00 28 0 0

1382 1409 56432 56459 7e-04 52.8  
33  
gi|33285930|gb|AY223845.1| scaffold9928 100.00 28 0 0  
1382 1409 15509 15482 7e-04 52.8  
gi|33285930|gb|AY223845.1| scaffold9920 100.00 28 0 0  
1382 1409 54792 54819 7e-04 52.8  
gi|33285930|gb|AY223845.1| scaffold9866 100.00 28 0 0  
1382 1409 26978 26951 7e-04 52.8  
gi|33285930|gb|AY223845.1| scaffold9569 100.00 28 0 0  
1382 1409 60848 60821 7e-04 52.8  
gi|33285930|gb|AY223845.1| scaffold9225 100.00 28 0 0  
1382 1409 934 907 7e-04 52.8  
gi|33285930|gb|AY223845.1| scaffold9192 100.00 28 0 0  
1382 1409 50059 50086 7e-04 52.8  
gi|33285930|gb|AY223845.1| scaffold8881 100.00 28 0 0  
1382 1409 79714 79741 7e-04 52.8  
gi|33285930|gb|AY223845.1| scaffold8853 100.00 28 0 0  
1382 1409 31112 31085 7e-04 52.8  
gi|33285930|gb|AY223845.1| scaffold8644 100.00 28 0 0  
1382 1409 5885 5912 7e-04 52.8  
gi|33285930|gb|AY223845.1| scaffold8604 100.00 28 0 0  
1382 1409 78090 78117 7e-04 52.8  
gi|33285930|gb|AY223845.1| scaffold8432 100.00 28 0 0  
1382 1409 16013 15986 7e-04 52.8  
gi|33285930|gb|AY223845.1| scaffold7688 100.00 28 0 0  
1382 1409 18265 18292 7e-04 52.8  
gi|33285930|gb|AY223845.1| scaffold7688 100.00 28 0 0  
1382 1409 18613 18640 7e-04 52.8  
gi|33285930|gb|AY223845.1| scaffold7688 100.00 28 0 0  
1382 1409 22808 22835 7e-04 52.8  
gi|33285930|gb|AY223845.1| scaffold7598 100.00 28 0 0  
1382 1409 63414 63441 7e-04 52.8  
gi|33285930|gb|AY223845.1| scaffold7551 100.00 28 0 0  
1382 1409 56873 56900 7e-04 52.8  
gi|33285930|gb|AY223845.1| scaffold7566 100.00 28 0 0  
1382 1409 39789 39816 7e-04 52.8  
gi|33285930|gb|AY223845.1| scaffold7232 100.00 28 0 0  
1382 1409 18238 18265 7e-04 52.8  
gi|33285930|gb|AY223845.1| scaffold7160 100.00 28 0 0  
1382 1409 23030 23057 7e-04 52.8  
gi|33285930|gb|AY223845.1| scaffold7107 100.00 28 0 0  
1382 1409 18993 19020 7e-04 52.8  
gi|33285930|gb|AY223845.1| scaffold6968 100.00 28 0 0  
1382 1409 86762 86735 7e-04 52.8  
gi|33285930|gb|AY223845.1| scaffold6883 94.29 35 1 1 1375  
1409 83222 83189 7e-04 52.8



gi|33285930|gb|AY223845.1| scaffold6830 100.00 28 0 0  
1382 1409 71001 70974 7e-04 52.8  
gi|33285930|gb|AY223845.1| scaffold6400 100.00 28 0 0  
1382 1409 48162 48189 7e-04 52.8  
gi|33285930|gb|AY223845.1| scaffold6190 100.00 28 0 0  
1382 1409 12657 12684 7e-04 52.8  
gi|33285930|gb|AY223845.1| scaffold6161 100.00 28 0 0  
1382 1409 96389 96416 7e-04 52.8  
34  
gi|33285930|gb|AY223845.1| scaffold6016 100.00 28 0 0  
1382 1409 63992 64019 7e-04 52.8  
gi|33285930|gb|AY223845.1| scaffold5888 100.00 28 0 0  
1382 1409 48877 48904 7e-04 52.8  
gi|33285930|gb|AY223845.1| scaffold5863 100.00 28 0 0  
1382 1409 91995 91968 7e-04 52.8  
gi|33285930|gb|AY223845.1| scaffold5830 100.00 28 0 0  
1382 1409 101004 100977 7e-04 52.8  
gi|33285930|gb|AY223845.1| scaffold5749 100.00 28 0 0  
1382 1409 39408 39435 7e-04 52.8  
gi|33285930|gb|AY223845.1| scaffold5675 100.00 28 0 0  
1382 1409 111260 111287 7e-04 52.8  
gi|33285930|gb|AY223845.1| scaffold5674 100.00 28 0 0  
1382 1409 52732 52759 7e-04 52.8  
gi|33285930|gb|AY223845.1| scaffold5565 100.00 28 0 0  
1382 1409 45688 45715 7e-04 52.8  
gi|33285930|gb|AY223845.1| scaffold5492 100.00 28 0 0  
1382 1409 30630 30657 7e-04 52.8  
gi|33285930|gb|AY223845.1| scaffold5240 100.00 28 0 0  
1382 1409 17349 17322 7e-04 52.8  
gi|33285930|gb|AY223845.1| scaffold5237 100.00 28 0 0  
1382 1409 43203 43176 7e-04 52.8  
gi|33285930|gb|AY223845.1| scaffold5205 100.00 28 0 0  
1382 1409 84110 84083 7e-04 52.8  
gi|33285930|gb|AY223845.1| scaffold5205 100.00 28 0 0  
1382 1409 94230 94203 7e-04 52.8  
gi|33285930|gb|AY223845.1| scaffold4899 100.00 28 0 0  
1382 1409 8201 8174 7e-04 52.8  
gi|33285930|gb|AY223845.1| scaffold4884 100.00 28 0 0  
1382 1409 47869 47896 7e-04 52.8  
gi|33285930|gb|AY223845.1| scaffold4864 100.00 28 0 0  
1382 1409 87107 87080 7e-04 52.8  
gi|33285930|gb|AY223845.1| scaffold4573 100.00 28 0 0  
1382 1409 27245 27218 7e-04 52.8  
gi|33285930|gb|AY223845.1| scaffold4467 100.00 28 0 0  
1382 1409 29564 29537 7e-04 52.8  
gi|33285930|gb|AY223845.1| scaffold4333 100.00 28 0 0

1382 1409 94576 94549 7e-04 52.8  
gi|33285930|gb|AY223845.1| scaffold4369 100.00 28 0 0  
1382 1409 109041 109068 7e-04 52.8  
gi|33285930|gb|AY223845.1| scaffold4301 100.00 28 0 0  
1382 1409 52796 52823 7e-04 52.8  
gi|33285930|gb|AY223845.1| scaffold4297 100.00 28 0 0  
1382 1409 129115 129142 7e-04 52.8  
gi|33285930|gb|AY223845.1| scaffold4277 100.00 28 0 0  
1382 1409 4247 4274 7e-04 52.8  
gi|33285930|gb|AY223845.1| scaffold4193 100.00 28 0 0  
1382 1409 140713 140686 7e-04 52.8  
gi|33285930|gb|AY223845.1| scaffold4191 100.00 28 0 0  
1382 1409 29956 29929 7e-04 52.8  
gi|33285930|gb|AY223845.1| scaffold4080 100.00 28 0 0  
1382 1409 114444 114471 7e-04 52.8  
35  
gi|33285930|gb|AY223845.1| scaffold4080 100.00 28 0 0  
1382 1409 129054 129027 7e-04 52.8  
gi|33285930|gb|AY223845.1| scaffold3959 100.00 28 0 0  
1382 1409 157408 157381 7e-04 52.8  
gi|33285930|gb|AY223845.1| scaffold3987 100.00 28 0 0  
1382 1409 130534 130507 7e-04 52.8  
gi|33285930|gb|AY223845.1| scaffold3846 100.00 28 0 0  
1382 1409 120005 119978 7e-04 52.8  
gi|33285930|gb|AY223845.1| scaffold3734 100.00 28 0 0  
1382 1409 118413 118386 7e-04 52.8  
gi|33285930|gb|AY223845.1| scaffold3714 100.00 28 0 0  
1382 1409 9761 9788 7e-04 52.8  
gi|33285930|gb|AY223845.1| scaffold3683 100.00 28 0 0  
1382 1409 49056 49029 7e-04 52.8  
gi|33285930|gb|AY223845.1| scaffold3593 100.00 28 0 0  
1382 1409 132002 132029 7e-04 52.8  
gi|33285930|gb|AY223845.1| scaffold3536 100.00 28 0 0  
1382 1409 94837 94864 7e-04 52.8  
gi|33285930|gb|AY223845.1| scaffold3468 100.00 28 0 0  
1382 1409 47091 47118 7e-04 52.8  
gi|33285930|gb|AY223845.1| scaffold3342 100.00 28 0 0  
1382 1409 78060 78087 7e-04 52.8  
gi|33285930|gb|AY223845.1| scaffold3350 100.00 28 0 0  
1382 1409 70213 70186 7e-04 52.8  
gi|33285930|gb|AY223845.1| scaffold3320 100.00 28 0 0  
1382 1409 46183 46210 7e-04 52.8  
gi|33285930|gb|AY223845.1| scaffold3320 100.00 28 0 0  
1382 1409 135245 135272 7e-04 52.8  
gi|33285930|gb|AY223845.1| scaffold3305 100.00 28 0 0  
1382 1409 149577 149604 7e-04 52.8

gi|33285930|gb|AY223845.1| scaffold3259 100.00 28 0 0  
1382 1409 130370 130343 7e-04 52.8  
gi|33285930|gb|AY223845.1| scaffold3177 100.00 28 0 0  
1382 1409 141430 141403 7e-04 52.8  
gi|33285930|gb|AY223845.1| scaffold3131 100.00 28 0 0  
1382 1409 94275 94248 7e-04 52.8  
gi|33285930|gb|AY223845.1| scaffold3098 100.00 28 0 0  
1382 1409 116360 116387 7e-04 52.8  
gi|33285930|gb|AY223845.1| scaffold3017 100.00 28 0 0  
1382 1409 61214 61241 7e-04 52.8  
gi|33285930|gb|AY223845.1| scaffold2975 100.00 28 0 0  
1382 1409 124991 124964 7e-04 52.8  
gi|33285930|gb|AY223845.1| scaffold2951 100.00 28 0 0  
1382 1409 121977 122004 7e-04 52.8  
gi|33285930|gb|AY223845.1| scaffold2946 100.00 28 0 0  
1382 1409 25134 25107 7e-04 52.8  
gi|33285930|gb|AY223845.1| scaffold2931 100.00 28 0 0  
1382 1409 70119 70146 7e-04 52.8  
gi|33285930|gb|AY223845.1| scaffold2935 100.00 28 0 0  
1382 1409 32091 32118 7e-04 52.8  
gi|33285930|gb|AY223845.1| scaffold2918 100.00 28 0 0  
1382 1409 162450 162477 7e-04 52.8

36

gi|33285930|gb|AY223845.1| scaffold2860 100.00 28 0 0  
1382 1409 104726 104699 7e-04 52.8  
gi|33285930|gb|AY223845.1| scaffold2807 100.00 28 0 0  
1382 1409 181588 181615 7e-04 52.8  
gi|33285930|gb|AY223845.1| scaffold2745 100.00 28 0 0  
1382 1409 28190 28217 7e-04 52.8  
gi|33285930|gb|AY223845.1| scaffold2596 100.00 28 0 0  
1382 1409 3940 3913 7e-04 52.8  
gi|33285930|gb|AY223845.1| scaffold2557 100.00 28 0 0  
1382 1409 196085 196112 7e-04 52.8  
gi|33285930|gb|AY223845.1| scaffold2526 100.00 28 0 0  
1382 1409 102990 102963 7e-04 52.8  
gi|33285930|gb|AY223845.1| scaffold2451 100.00 28 0 0  
1382 1409 215017 214990 7e-04 52.8  
gi|33285930|gb|AY223845.1| scaffold2404 100.00 28 0 0  
1382 1409 75749 75776 7e-04 52.8  
gi|33285930|gb|AY223845.1| scaffold2400 100.00 28 0 0  
1382 1409 21851 21878 7e-04 52.8  
gi|33285930|gb|AY223845.1| scaffold2248 100.00 28 0 0  
1382 1409 22310 22283 7e-04 52.8  
gi|33285930|gb|AY223845.1| scaffold2218 100.00 28 0 0  
1382 1409 133494 133467 7e-04 52.8  
gi|33285930|gb|AY223845.1| scaffold2205 100.00 28 0 0

1382 1409 16116 16089 7e-04 52.8  
gi|33285930|gb|AY223845.1| scaffold2074 100.00 28 0 0  
1382 1409 170715 170688 7e-04 52.8  
gi|33285930|gb|AY223845.1| scaffold2059 100.00 28 0 0  
1382 1409 59551 59578 7e-04 52.8  
gi|33285930|gb|AY223845.1| scaffold2013 100.00 28 0 0  
1382 1409 128164 128191 7e-04 52.8  
gi|33285930|gb|AY223845.1| scaffold1992 100.00 28 0 0  
1382 1409 154651 154624 7e-04 52.8  
gi|33285930|gb|AY223845.1| scaffold1857 100.00 28 0 0  
1382 1409 225068 225041 7e-04 52.8  
gi|33285930|gb|AY223845.1| scaffold1834 100.00 28 0 0  
1382 1409 371086 371113 7e-04 52.8  
gi|33285930|gb|AY223845.1| scaffold1782 100.00 28 0 0  
1382 1409 37941 37968 7e-04 52.8  
gi|33285930|gb|AY223845.1| scaffold1719 100.00 28 0 0  
1382 1409 83712 83685 7e-04 52.8  
gi|33285930|gb|AY223845.1| scaffold1695 100.00 28 0 0  
1382 1409 179129 179102 7e-04 52.8  
gi|33285930|gb|AY223845.1| scaffold1682 100.00 28 0 0  
1382 1409 7348 7321 7e-04 52.8  
gi|33285930|gb|AY223845.1| scaffold1684 100.00 28 0 0  
1382 1409 93530 93503 7e-04 52.8  
gi|33285930|gb|AY223845.1| scaffold1644 100.00 28 0 0  
1382 1409 3821 3848 7e-04 52.8  
gi|33285930|gb|AY223845.1| scaffold1586 100.00 28 0 0  
1382 1409 28065 28092 7e-04 52.8  
gi|33285930|gb|AY223845.1| scaffold1554 100.00 28 0 0  
1382 1409 26139 26112 7e-04 52.8  
37  
gi|33285930|gb|AY223845.1| scaffold1549 100.00 28 0 0  
1382 1409 63313 63286 7e-04 52.8  
gi|33285930|gb|AY223845.1| scaffold1510 100.00 28 0 0  
1382 1409 134859 134832 7e-04 52.8  
gi|33285930|gb|AY223845.1| scaffold1489 100.00 28 0 0  
1382 1409 168324 168297 7e-04 52.8  
gi|33285930|gb|AY223845.1| scaffold1444 100.00 28 0 0  
1382 1409 236884 236857 7e-04 52.8  
gi|33285930|gb|AY223845.1| scaffold1423 100.00 28 0 0  
1382 1409 275137 275164 7e-04 52.8  
gi|33285930|gb|AY223845.1| scaffold1402 100.00 28 0 0  
1382 1409 95397 95370 7e-04 52.8  
gi|33285930|gb|AY223845.1| scaffold1397 100.00 28 0 0  
1382 1409 105221 105194 7e-04 52.8  
gi|33285930|gb|AY223845.1| scaffold1379 100.00 28 0 0  
1382 1409 51207 51180 7e-04 52.8

gi|33285930|gb|AY223845.1| scaffold1359 100.00 28 0 0  
1382 1409 156285 156312 7e-04 52.8  
gi|33285930|gb|AY223845.1| scaffold1340 100.00 28 0 0  
1382 1409 180222 180249 7e-04 52.8  
gi|33285930|gb|AY223845.1| scaffold1314 100.00 28 0 0  
1382 1409 142783 142810 7e-04 52.8  
gi|33285930|gb|AY223845.1| scaffold1226 100.00 28 0 0  
1382 1409 208488 208515 7e-04 52.8  
gi|33285930|gb|AY223845.1| scaffold1127 100.00 28 0 0  
1382 1409 143574 143601 7e-04 52.8  
gi|33285930|gb|AY223845.1| scaffold1144 100.00 28 0 0  
1382 1409 174372 174345 7e-04 52.8  
gi|33285930|gb|AY223845.1| scaffold1122\_2 100.00 28 0 0  
1382 1409 47499 47472 7e-04 52.8  
gi|33285930|gb|AY223845.1| scaffold1065 100.00 28 0 0  
1382 1409 182535 182508 7e-04 52.8  
gi|33285930|gb|AY223845.1| scaffold841 100.00 28 0 0  
1382 1409 28650 28623 7e-04 52.8  
gi|33285930|gb|AY223845.1| scaffold1066 100.00 28 0 0  
1382 1409 117074 117101 7e-04 52.8  
gi|33285930|gb|AY223845.1| scaffold1044 100.00 28 0 0  
1382 1409 53685 53712 7e-04 52.8  
gi|33285930|gb|AY223845.1| scaffold1038 100.00 28 0 0  
1382 1409 266865 266892 7e-04 52.8  
gi|33285930|gb|AY223845.1| scaffold1042 100.00 28 0 0  
1382 1409 82467 82494 7e-04 52.8  
gi|33285930|gb|AY223845.1| scaffold969 100.00 28 0 0  
1382 1409 9710 9737 7e-04 52.8  
gi|33285930|gb|AY223845.1| scaffold954 100.00 28 0 0  
1382 1409 129241 129214 7e-04 52.8  
gi|33285930|gb|AY223845.1| scaffold923 100.00 28 0 0  
1382 1409 134009 134036 7e-04 52.8  
gi|33285930|gb|AY223845.1| scaffold866 100.00 28 0 0  
1382 1409 249739 249712 7e-04 52.8  
gi|33285930|gb|AY223845.1| scaffold718\_2 100.00 28 0 0  
1382 1409 186137 186164 7e-04 52.8  
38  
gi|33285930|gb|AY223845.1| scaffold752 100.00 28 0 0  
1382 1409 54352 54325 7e-04 52.8  
gi|33285930|gb|AY223845.1| scaffold752 100.00 28 0 0  
1382 1409 72881 72908 7e-04 52.8  
gi|33285930|gb|AY223845.1| scaffold705 100.00 28 0 0  
1382 1409 158651 158624 7e-04 52.8  
gi|33285930|gb|AY223845.1| scaffold711 100.00 28 0 0  
1382 1409 377530 377503 7e-04 52.8  
gi|33285930|gb|AY223845.1| scaffold677 100.00 28 0 0

1382 1409 89508 89481 7e-04 52.8  
gi|33285930|gb|AY223845.1| scaffold636 100.00 28 0 0  
1382 1409 42334 42307 7e-04 52.8  
gi|33285930|gb|AY223845.1| scaffold663 100.00 28 0 0  
1382 1409 8568 8541 7e-04 52.8  
gi|33285930|gb|AY223845.1| scaffold599 100.00 28 0 0  
1382 1409 182062 182035 7e-04 52.8  
gi|33285930|gb|AY223845.1| scaffold586 100.00 28 0 0  
1382 1409 135286 135259 7e-04 52.8  
gi|33285930|gb|AY223845.1| scaffold588 100.00 28 0 0  
1382 1409 312846 312873 7e-04 52.8  
gi|33285930|gb|AY223845.1| scaffold549 100.00 28 0 0  
1382 1409 413919 413892 7e-04 52.8  
gi|33285930|gb|AY223845.1| scaffold532 100.00 28 0 0  
1382 1409 136672 136645 7e-04 52.8  
gi|33285930|gb|AY223845.1| scaffold426 100.00 28 0 0  
1382 1409 27086 27059 7e-04 52.8  
gi|33285930|gb|AY223845.1| scaffold363 100.00 28 0 0  
1382 1409 328898 328871 7e-04 52.8  
gi|33285930|gb|AY223845.1| scaffold336 100.00 28 0 0  
1382 1409 299046 299073 7e-04 52.8  
gi|33285930|gb|AY223845.1| scaffold317 100.00 28 0 0  
1382 1409 328608 328635 7e-04 52.8  
gi|33285930|gb|AY223845.1| scaffold288 100.00 28 0 0  
1382 1409 163743 163770 7e-04 52.8  
gi|33285930|gb|AY223845.1| scaffold283 100.00 28 0 0  
1382 1409 276189 276162 7e-04 52.8  
gi|33285930|gb|AY223845.1| scaffold253 100.00 28 0 0  
1382 1409 468644 468671 7e-04 52.8  
gi|33285930|gb|AY223845.1| scaffold249 100.00 28 0 0  
1382 1409 66768 66795 7e-04 52.8  
gi|33285930|gb|AY223845.1| scaffold244 100.00 28 0 0  
1382 1409 369957 369984 7e-04 52.8  
gi|33285930|gb|AY223845.1| scaffold194 100.00 28 0 0  
1382 1409 351782 351809 7e-04 52.8  
gi|33285930|gb|AY223845.1| scaffold194 100.00 28 0 0  
1382 1409 493361 493334 7e-04 52.8  
gi|33285930|gb|AY223845.1| scaffold191 100.00 28 0 0  
1382 1409 190880 190907 7e-04 52.8  
gi|33285930|gb|AY223845.1| scaffold170 100.00 28 0 0  
1382 1409 63864 63837 7e-04 52.8  
gi|33285930|gb|AY223845.1| scaffold160 100.00 28 0 0  
1382 1409 187920 187947 7e-04 52.8  
39  
gi|33285930|gb|AY223845.1| scaffold80 100.00 28 0 0 1382  
1409 495972 495999 7e-04 52.8

gi|33285930|gb|AY223845.1| scaffold98 100.00 28 0 0 1382  
1409 534125 534152 7e-04 52.8  
gi|33285930|gb|AY223845.1| scaffold85 100.00 28 0 0 1382  
1409 486728 486701 7e-04 52.8  
gi|33285930|gb|AY223845.1| scaffold77 100.00 28 0 0 1382  
1409 369513 369486 7e-04 52.8  
gi|33285930|gb|AY223845.1| scaffold73 100.00 28 0 0 1382  
1409 564189 564216 7e-04 52.8  
gi|33285930|gb|AY223845.1| scaffold43 100.00 28 0 0 1382  
1409 571013 571040 7e-04 52.8  
gi|33285930|gb|AY223845.1| scaffold59 100.00 28 0 0 1382  
1409 448441 448468 7e-04 52.8  
gi|33285930|gb|AY223845.1| scaffold67 100.00 28 0 0 1382  
1409 590402 590429 7e-04 52.8  
gi|33285930|gb|AY223845.1| scaffold45 100.00 28 0 0 1382  
1409 517442 517415 7e-04 52.8  
gi|33285930|gb|AY223845.1| scaffold50 100.00 28 0 0 1382  
1409 741678 741651 7e-04 52.8  
gi|33285930|gb|AY223845.1| scaffold16 100.00 28 0 0 1382  
1409 114751 114778 7e-04 52.8  
gi|33285930|gb|AY223845.1| scaffold8\_2 100.00 28 0 0  
1382 1409 788610 788637 7e-04 52.8  
gi|33285930|gb|AY223845.1| scaffold2 100.00 28 0 0 1382  
1409 931807 931834 7e-04 52.8  
gi|33285930|gb|AY223845.1| scaffold2 100.00 28 0 0 1382  
1409 1021958 1021985 7e-04 52.8  
gi|33285930|gb|AY223845.1| scaffold10 100.00 28 0 0 1382  
1409 764385 764412 7e-04 52.8

BLASTN 2.2.28+

Query: gi|33285929|gb|AY223844.1| Aedes albopictus containing  
putative integrated non-retroviral sequence

Fields: query id, subject id, % identity, alignment length,  
mismatches, gap opens, q. start, q. end, s. start, s. end, evaluate,  
bit

score

3484 hits found

gi|33285929|gb|AY223844.1| scaffold5617 95.06 1538 62 5 148  
1682 89672 88146 0.0 2407  
gi|33285929|gb|AY223844.1| scaffold5617 94.20 276 16 0 2477  
2752 88153 87878 5e-115 422  
gi|33285929|gb|AY223844.1| scaffold5617 89.47 323 12 10 148  
470 79773 79473 5e-105 388  
gi|33285929|gb|AY223844.1| scaffold5617 89.60 202 8 7 1483  
1682 79456 79266 1e-61 244  
gi|33285929|gb|AY223844.1| scaffold2592 96.36 797 28 1 1681

2476 175782 174986 0.0 1312  
gi|33285929|gb|AY223844.1| scaffold2592 88.21 755 70 14 1714  
2458 175004 175749 0.0 883  
gi|33285929|gb|AY223844.1| scaffold2592 97.84 278 4 2 2758  
3033 167304 167027 3e-132 479  
40  
gi|33285929|gb|AY223844.1| scaffold2592 90.36 363 34 1 1683  
2044 28591 28953 4e-131 475  
gi|33285929|gb|AY223844.1| scaffold2592 90.63 331 30 1 2148  
2477 30780 31110 5e-120 438  
gi|33285929|gb|AY223844.1| scaffold2592 89.49 333 35 0 2127  
2459 28953 28621 5e-115 422  
gi|33285929|gb|AY223844.1| scaffold2592 88.86 332 33 4 1696  
2023 31111 30780 5e-110 405  
gi|33285929|gb|AY223844.1| scaffold2592 90.60 234 13 7 2804  
3036 109103 108878 7e-79 302  
gi|33285929|gb|AY223844.1| scaffold2238 94.72 796 40 1 1683  
2476 224767 223972 0.0 1238  
gi|33285929|gb|AY223844.1| scaffold2238 87.83 756 72 14 1714  
2458 223990 224736 0.0 870  
gi|33285929|gb|AY223844.1| scaffold2238 98.91 275 3 0 2764  
3038 223826 223552 4e-136 492  
gi|33285929|gb|AY223844.1| scaffold2238 98.18 274 4 1 2764  
3037 250412 250684 1e-131 477  
gi|33285929|gb|AY223844.1| scaffold2238 98.12 160 3 0 2751  
2910 228611 228452 3e-72 279  
gi|33285929|gb|AY223844.1| scaffold2238 99.20 125 1 0 2909  
3033 189467 189591 4e-56 226  
gi|33285929|gb|AY223844.1| scaffold2238 93.44 122 0 3 2909  
3030 228056 227943 2e-40 174  
gi|33285929|gb|AY223844.1| scaffold2193 94.06 808 47 1 1677  
2484 76303 77109 0.0 1227  
gi|33285929|gb|AY223844.1| scaffold2193 87.67 754 74 14 1714  
2458 77083 76340 0.0 861  
gi|33285929|gb|AY223844.1| scaffold2193 98.59 284 3 1 2754  
3036 3759 4042 7e-139 501  
gi|33285929|gb|AY223844.1| scaffold2193 97.86 280 4 2 2758  
3035 222283 222004 2e-133 483  
gi|33285929|gb|AY223844.1| scaffold2193 95.19 291 7 2 2761  
3044 72226 72516 2e-124 453  
gi|33285929|gb|AY223844.1| scaffold2193 98.09 157 3 0 2764  
2920 20766 20922 2e-70 274  
gi|33285929|gb|AY223844.1| scaffold2193 82.03 306 29 11 1683  
1984 34752 35035 2e-59 237  
gi|33285929|gb|AY223844.1| scaffold2193 83.13 243 28 6 2187  
2425 35035 34802 4e-51 209



gi|33285929|gb|AY223844.1| scaffold2193 88.57 105 11 1 2775  
2879 142907 142804 5e-26 126  
gi|33285929|gb|AY223844.1| scaffold2193 97.87 47 1 0 2909  
2955 107486 107532 1e-12 82.4  
gi|33285929|gb|AY223844.1| scaffold10990 94.21 794 46 0 1683  
2476 24512 25305 0.0 1214  
gi|33285929|gb|AY223844.1| scaffold10990 88.86 772 65 15 1700  
2459 25303 24541 0.0 929  
gi|33285929|gb|AY223844.1| scaffold258 93.97 796 48 0 1683  
2478 290868 291663 0.0 1206  
gi|33285929|gb|AY223844.1| scaffold258 89.39 773 59 16 1700  
2459 291659 290897 0.0 953  
41  
gi|33285929|gb|AY223844.1| scaffold258 98.90 273 3 0 2761  
3033 407589 407861 5e-135 488  
gi|33285929|gb|AY223844.1| scaffold258 96.81 282 7 2 2758  
3037 176387 176106 2e-129 470  
gi|33285929|gb|AY223844.1| scaffold258 95.82 287 9 3 2752  
3036 164301 164016 1e-126 460  
gi|33285929|gb|AY223844.1| scaffold258 96.68 271 9 0 2765  
3035 86944 87214 7e-124 451  
gi|33285929|gb|AY223844.1| scaffold258 98.11 53 1 0 2833  
2885 514518 514466 5e-16 93.5  
gi|33285929|gb|AY223844.1| scaffold258 100.00 48 0 0  
2764 2811 514560 514513 6e-15 89.8  
gi|33285929|gb|AY223844.1| scaffold6110 93.86 798 49 0 1679  
2476 111804 111007 0.0 1205  
gi|33285929|gb|AY223844.1| scaffold6110 88.62 773 65 17 1700  
2459 111009 111771 0.0 918  
gi|33285929|gb|AY223844.1| scaffold840 93.84 796 49 0 1681  
2476 40696 41491 0.0 1201  
gi|33285929|gb|AY223844.1| scaffold840 92.32 794 60 1 1683  
2476 206393 207185 0.0 1129  
gi|33285929|gb|AY223844.1| scaffold840 89.12 772 63 15 1700  
2459 41489 40727 0.0 941  
gi|33285929|gb|AY223844.1| scaffold840 88.70 770 69 12 1700  
2459 207183 206422 0.0 926  
gi|33285929|gb|AY223844.1| scaffold840 97.58 289 3 4 2751  
3036 258322 258035 4e-136 492  
gi|33285929|gb|AY223844.1| scaffold840 92.33 287 4 8 2752  
3036 201011 201281 4e-106 392  
gi|33285929|gb|AY223844.1| scaffold840 98.02 202 4 0 2756  
2957 357851 357650 7e-94 351  
gi|33285929|gb|AY223844.1| scaffold840 94.92 177 5 4 2755  
2927 298521 298345 2e-70 274  
gi|33285929|gb|AY223844.1| scaffold840 100.00 92 0 0

2946 3037 298258 298167 2e-39 171  
gi|33285929|gb|AY223844.1| scaffold840 96.97 33 1 0 2846  
2878 330415 330447 6e-05 56.5  
gi|33285929|gb|AY223844.1| scaffold12427 93.60 797 51 0 1683  
2479 19644 18848 0.0 1192  
gi|33285929|gb|AY223844.1| scaffold12427 89.27 755 64 12 1714  
2459 18869 19615 0.0 931  
gi|33285929|gb|AY223844.1| scaffold12243 93.58 794 51 0 1683  
2476 14339 15132 0.0 1186  
gi|33285929|gb|AY223844.1| scaffold12243 88.56 778 65 18 1696  
2459 15135 14368 0.0 922  
gi|33285929|gb|AY223844.1| scaffold6909 93.47 796 52 0 1681  
2476 20482 21277 0.0 1184  
gi|33285929|gb|AY223844.1| scaffold6909 89.73 769 60 14 1700  
2457 21275 20515 0.0 965  
gi|33285929|gb|AY223844.1| scaffold6909 95.15 227 9 2 2758  
2982 61863 62089 2e-95 357  
gi|33285929|gb|AY223844.1| scaffold2371 93.58 794 51 0 1683  
2476 85871 85078 0.0 1184  
42  
gi|33285929|gb|AY223844.1| scaffold2371 89.65 773 57 18 1700  
2459 85080 85842 0.0 963  
gi|33285929|gb|AY223844.1| scaffold2371 96.48 142 4 1 2752  
2893 18747 18607 3e-58 233  
gi|33285929|gb|AY223844.1| scaffold2371 100.00 91 0 0  
2946 3036 18344 18254 8e-39 169  
gi|33285929|gb|AY223844.1| scaffold10203 93.46 795 51 1 1683  
2476 12233 11439 0.0 1181  
gi|33285929|gb|AY223844.1| scaffold10203 88.21 772 71 15 1700  
2459 11441 12204 0.0 905  
gi|33285929|gb|AY223844.1| scaffold10203 96.15 286 4 1 2751  
3036 33443 33721 1e-126 460  
gi|33285929|gb|AY223844.1| scaffold10203 100.00 33 0 0  
3175 3207 1587 1555 1e-06 62.1  
gi|33285929|gb|AY223844.1| scaffold10026 93.46 795 50 2 1683  
2476 3833 4626 0.0 1181  
gi|33285929|gb|AY223844.1| scaffold10026 89.09 770 65 13 1700  
2458 4624 3863 0.0 941  
gi|33285929|gb|AY223844.1| scaffold10026 95.54 157 6 1 2755  
2910 25998 26154 3e-63 250  
gi|33285929|gb|AY223844.1| scaffold10026 95.96 99 4 0 2938  
3036 28185 28283 1e-36 161  
gi|33285929|gb|AY223844.1| scaffold10026 100.00 34 0 0  
3173 3206 53342 53375 4e-07 63.9  
gi|33285929|gb|AY223844.1| scaffold5516 92.95 809 56 1 1672  
2480 103594 102787 0.0 1179

gi|33285929|gb|AY223844.1| scaffold5516 89.52 773 58 17 1700  
2459 102793 103555 0.0 959  
gi|33285929|gb|AY223844.1| scaffold5516 99.26 272 2 0 2764  
3035 115332 115603 4e-136 492  
gi|33285929|gb|AY223844.1| scaffold5516 97.18 284 6 2 2755  
3036 67414 67697 3e-132 479  
gi|33285929|gb|AY223844.1| scaffold4872 93.34 796 53 0 1681  
2476 56194 55399 0.0 1179  
gi|33285929|gb|AY223844.1| scaffold4872 87.98 774 68 19 1700  
2459 55401 56163 0.0 891  
gi|33285929|gb|AY223844.1| scaffold4872 97.75 267 5 1 2761  
3026 51172 50906 4e-126 459  
gi|33285929|gb|AY223844.1| scaffold4872 96.42 279 8 2 2757  
3034 194006 194283 4e-126 459  
gi|33285929|gb|AY223844.1| scaffold4872 98.77 243 3 0 2764  
3006 102598 102840 2e-118 433  
gi|33285929|gb|AY223844.1| scaffold4872 98.94 188 2 0 2764  
2951 39921 40108 2e-89 337  
gi|33285929|gb|AY223844.1| scaffold4872 99.29 141 0 1 2903  
3042 88338 88198 2e-64 254  
gi|33285929|gb|AY223844.1| scaffold4872 96.15 156 4 2 2758  
2911 89263 89108 2e-64 254  
gi|33285929|gb|AY223844.1| scaffold4872 100.00 92 0 0  
2943 3034 133299 133208 2e-39 171  
gi|33285929|gb|AY223844.1| scaffold4872 98.85 87 1 0 2950  
3036 236053 235967 6e-35 156  
43  
gi|33285929|gb|AY223844.1| scaffold5625 93.25 800 50 4 1683  
2480 109396 110193 0.0 1177  
gi|33285929|gb|AY223844.1| scaffold5625 87.98 774 68 19 1700  
2459 110187 109425 0.0 891  
gi|33285929|gb|AY223844.1| scaffold5625 97.18 284 5 3 2754  
3035 119789 120071 1e-131 477  
gi|33285929|gb|AY223844.1| scaffold5625 97.40 192 4 1 2760  
2951 2778 2968 4e-86 326  
gi|33285929|gb|AY223844.1| scaffold5625 89.05 201 21 1 2790  
2989 3532 3732 9e-63 248  
gi|33285929|gb|AY223844.1| scaffold2231 92.85 811 56 2 1670  
2480 140446 141254 0.0 1177  
gi|33285929|gb|AY223844.1| scaffold2231 88.21 772 69 16 1700  
2459 141248 140487 0.0 902  
gi|33285929|gb|AY223844.1| scaffold2231 96.48 284 9 1 2761  
3043 99443 99160 7e-129 468  
gi|33285929|gb|AY223844.1| scaffold2231 96.70 273 5 1 2765  
3037 33386 33654 7e-124 451  
gi|33285929|gb|AY223844.1| scaffold2231 95.31 277 10 3 2755

3029 29844 29569 2e-119 436  
gi|33285929|gb|AY223844.1| scaffold2231 94.91 216 9 2 2743  
2957 109784 109998 2e-89 337  
gi|33285929|gb|AY223844.1| scaffold2231 85.03 187 17 8 2753  
2934 160612 160792 4e-42 180  
gi|33285929|gb|AY223844.1| scaffold2231 97.85 93 2 0 2943  
3035 110053 110145 1e-36 161  
gi|33285929|gb|AY223844.1| scaffold2207 93.32 794 53 0 1683  
2476 134192 133399 0.0 1175  
gi|33285929|gb|AY223844.1| scaffold2207 88.08 772 71 15 1700  
2459 133401 134163 0.0 896  
gi|33285929|gb|AY223844.1| scaffold2207 97.86 281 4 2 2758  
3036 90918 90638 7e-134 484  
gi|33285929|gb|AY223844.1| scaffold2207 91.30 161 14 0 2751  
2911 120050 119890 2e-54 220  
gi|33285929|gb|AY223844.1| scaffold2207 87.39 119 9 2 2829  
2947 187272 187160 1e-27 132  
gi|33285929|gb|AY223844.1| scaffold854 93.32 794 53 0 1683  
2476 2185 1392 0.0 1175  
gi|33285929|gb|AY223844.1| scaffold854 90.86 733 65 2 1683  
2414 136777 137508 0.0 983  
gi|33285929|gb|AY223844.1| scaffold854 88.59 771 69 15 1700  
2459 1394 2156 0.0 920  
gi|33285929|gb|AY223844.1| scaffold854 87.11 714 70 18 1757  
2459 137508 136806 0.0 791  
gi|33285929|gb|AY223844.1| scaffold854 98.89 271 3 0 2764  
3034 132455 132725 7e-134 484  
gi|33285929|gb|AY223844.1| scaffold854 97.15 281 6 2 2758  
3036 178878 178598 1e-130 473  
gi|33285929|gb|AY223844.1| scaffold854 96.44 281 8 2 2758  
3036 64581 64301 3e-127 462  
gi|33285929|gb|AY223844.1| scaffold854 96.42 279 8 2 2760  
3036 252840 253118 4e-126 459  
44  
gi|33285929|gb|AY223844.1| scaffold854 99.53 215 1 0 2824  
3038 176231 176017 4e-106 392  
gi|33285929|gb|AY223844.1| scaffold854 92.23 283 7 7 2754  
3036 13748 13481 2e-104 387  
gi|33285929|gb|AY223844.1| scaffold854 92.74 124 7 2 2754  
2876 267345 267467 1e-41 178  
gi|33285929|gb|AY223844.1| scaffold854 95.12 82 4 0 3209  
3290 348718 348799 4e-27 130  
gi|33285929|gb|AY223844.1| scaffold225 93.32 794 53 0 1683  
2476 297226 296433 0.0 1175  
gi|33285929|gb|AY223844.1| scaffold225 89.26 773 60 17 1700  
2459 296435 297197 0.0 948

gi|33285929|gb|AY223844.1| scaffold225 96.90 290 8 1 2748  
3036 365330 365619 7e-134 484  
gi|33285929|gb|AY223844.1| scaffold225 96.55 290 6 3 2750  
3036 522771 523059 1e-131 477  
gi|33285929|gb|AY223844.1| scaffold225 97.80 273 6 0 2764  
3036 470399 470127 5e-130 472  
gi|33285929|gb|AY223844.1| scaffold225 97.11 277 6 2 2761  
3036 425932 426207 2e-128 466  
gi|33285929|gb|AY223844.1| scaffold225 96.09 281 8 3 2758  
3035 527270 526990 5e-125 455  
gi|33285929|gb|AY223844.1| scaffold225 94.20 276 6 4 2764  
3039 271489 271224 3e-112 412  
gi|33285929|gb|AY223844.1| scaffold225 97.46 236 5 1 2750  
2985 506611 506377 7e-109 401  
gi|33285929|gb|AY223844.1| scaffold225 95.12 205 9 1 2759  
2962 76181 76385 6e-85 322  
gi|33285929|gb|AY223844.1| scaffold130 93.22 796 54 0 1683  
2478 437108 436313 0.0 1173  
gi|33285929|gb|AY223844.1| scaffold130 89.39 773 59 17 1700  
2459 436317 437079 0.0 952  
gi|33285929|gb|AY223844.1| scaffold130 96.28 296 10 1 2755  
3049 411060 411355 7e-134 484  
gi|33285929|gb|AY223844.1| scaffold130 100.00 237 0 0  
2764 3000 101764 101528 5e-120 438  
gi|33285929|gb|AY223844.1| scaffold130 94.56 239 10 3 2755  
2990 309375 309137 3e-98 366  
gi|33285929|gb|AY223844.1| scaffold130 89.42 293 18 5 2751  
3036 229134 228848 2e-95 357  
gi|33285929|gb|AY223844.1| scaffold130 98.03 203 4 0 2833  
3035 223052 222850 2e-94 353  
gi|33285929|gb|AY223844.1| scaffold130 98.04 153 3 0 2823  
2975 370387 370235 3e-68 267  
gi|33285929|gb|AY223844.1| scaffold130 88.56 201 22 1 2789  
2988 106245 106445 4e-61 243  
gi|33285929|gb|AY223844.1| scaffold130 97.85 93 2 0 2764  
2856 370481 370389 1e-36 161  
gi|33285929|gb|AY223844.1| scaffold130 86.32 95 13 0 2844  
2938 425404 425310 2e-19 104  
gi|33285929|gb|AY223844.1| scaffold130 94.83 58 2 1 2754  
2811 223103 223047 6e-15 89.8  
45  
gi|33285929|gb|AY223844.1| scaffold204 93.11 798 55 0 1683  
2480 15967 15170 0.0 1171  
gi|33285929|gb|AY223844.1| scaffold204 88.08 772 71 16 1700  
2459 15176 15938 0.0 896  
gi|33285929|gb|AY223844.1| scaffold204 98.95 286 0 3 2753

3036 167694 167410 4e-141 508  
gi|33285929|gb|AY223844.1| scaffold204 86.42 162 3 5 2875  
3036 133621 133763 5e-36 159  
gi|33285929|gb|AY223844.1| scaffold204 100.00 81 0 0  
2958 3038 357960 357880 3e-33 150  
gi|33285929|gb|AY223844.1| scaffold204 84.42 154 13 4 2840  
2982 157682 157529 2e-30 141  
gi|33285929|gb|AY223844.1| scaffold204 89.16 83 5 2 2839  
2917 440107 440189 3e-18 100  
gi|33285929|gb|AY223844.1| scaffold204 87.76 49 6 0 2763  
2811 87302 87350 2e-05 58.4  
gi|33285929|gb|AY223844.1| scaffold858 93.10 797 55 0 1683  
2479 167316 166520 0.0 1170  
gi|33285929|gb|AY223844.1| scaffold858 88.69 769 68 14 1700  
2457 166525 167285 0.0 922  
gi|33285929|gb|AY223844.1| scaffold858 91.81 452 37 0 2027  
2478 95629 95178 2e-178 632  
gi|33285929|gb|AY223844.1| scaffold858 98.62 289 3 1 2751  
3038 90525 90813 1e-141 510  
gi|33285929|gb|AY223844.1| scaffold858 98.90 272 3 0 2764  
3035 245835 245564 2e-134 486  
gi|33285929|gb|AY223844.1| scaffold858 98.55 276 3 1 2761  
3035 344661 344386 2e-134 486  
gi|33285929|gb|AY223844.1| scaffold858 97.51 281 5 2 2754  
3034 88462 88740 3e-132 479  
gi|33285929|gb|AY223844.1| scaffold858 97.50 280 6 1 2755  
3033 118828 119107 1e-131 477  
gi|33285929|gb|AY223844.1| scaffold858 91.12 349 30 1 1708  
2055 95192 95540 5e-130 472  
gi|33285929|gb|AY223844.1| scaffold858 96.44 281 8 2 2758  
3036 148271 148551 3e-127 462  
gi|33285929|gb|AY223844.1| scaffold858 98.39 249 3 1 2791  
3038 81226 80978 2e-119 436  
gi|33285929|gb|AY223844.1| scaffold858 91.20 284 11 6 2758  
3035 404267 404542 1e-100 374  
gi|33285929|gb|AY223844.1| scaffold858 98.05 154 3 0 2884  
3037 421322 421475 7e-69 268  
gi|33285929|gb|AY223844.1| scaffold858 97.83 138 3 0 2752  
2889 270534 270671 6e-60 239  
gi|33285929|gb|AY223844.1| scaffold858 98.52 135 2 0 2761  
2895 421132 421266 6e-60 239  
gi|33285929|gb|AY223844.1| scaffold858 92.97 128 9 0 1683  
1810 95970 95843 2e-44 187  
gi|33285929|gb|AY223844.1| scaffold858 95.88 97 4 0 2361  
2457 95843 95939 2e-35 158  
gi|33285929|gb|AY223844.1| scaffold858 96.39 83 3 0 3208

3290 116894 116976 2e-29 137  
46  
gi|33285929|gb|AY223844.1| scaffold858 95.24 84 4 0 3207  
3290 192876 192959 3e-28 134  
gi|33285929|gb|AY223844.1| scaffold858 98.33 60 1 0 2978  
3037 270673 270732 6e-20 106  
gi|33285929|gb|AY223844.1| scaffold210 92.71 809 59 0 1675  
2483 4159 3351 0.0 1170  
gi|33285929|gb|AY223844.1| scaffold210 88.64 757 65 15 1714  
2459 3376 4122 0.0 902  
gi|33285929|gb|AY223844.1| scaffold210 99.66 290 0 1 2751  
3040 167085 167373 3e-147 529  
gi|33285929|gb|AY223844.1| scaffold210 97.53 283 6 1 2755  
3036 129633 129915 2e-133 483  
gi|33285929|gb|AY223844.1| scaffold210 97.51 281 5 2 2758  
3036 14579 14299 3e-132 479  
gi|33285929|gb|AY223844.1| scaffold210 97.15 281 6 2 2758  
3036 267342 267622 1e-130 473  
gi|33285929|gb|AY223844.1| scaffold210 96.22 291 7 4 2748  
3034 550509 550219 1e-130 473  
gi|33285929|gb|AY223844.1| scaffold210 96.04 278 5 5 2758  
3033 473907 474180 9e-123 448  
gi|33285929|gb|AY223844.1| scaffold210 91.55 296 14 10 2752  
3039 364895 365187 9e-108 398  
gi|33285929|gb|AY223844.1| scaffold210 96.17 209 5 3 2751  
2957 524849 525056 5e-90 339  
gi|33285929|gb|AY223844.1| scaffold210 88.28 290 23 7 2754  
3040 450820 451101 2e-89 337  
gi|33285929|gb|AY223844.1| scaffold210 97.53 162 4 0 2875  
3036 3357 3196 1e-71 278  
gi|33285929|gb|AY223844.1| scaffold210 95.77 142 5 1 2754  
2895 378148 378008 1e-56 228  
gi|33285929|gb|AY223844.1| scaffold210 94.03 134 6 2 2751  
2882 4285 4152 7e-49 202  
gi|33285929|gb|AY223844.1| scaffold210 99.03 103 1 0 2937  
3039 377863 377761 8e-44 185  
gi|33285929|gb|AY223844.1| scaffold210 95.33 107 5 0 2930  
3036 526079 526185 2e-39 171  
gi|33285929|gb|AY223844.1| scaffold210 96.43 84 3 0 3207  
3290 447560 447643 6e-30 139  
gi|33285929|gb|AY223844.1| scaffold210 96.34 82 3 0 3209  
3290 290674 290593 8e-29 135  
gi|33285929|gb|AY223844.1| scaffold210 83.45 145 12 4 2023  
2155 90029 90173 5e-26 126  
gi|33285929|gb|AY223844.1| scaffold8802 93.10 797 54 1 1683  
2479 34098 33303 0.0 1168

gi|33285929|gb|AY223844.1| scaffold8802 88.98 771 65 15 1700  
2459 33308 34069 0.0 937  
gi|33285929|gb|AY223844.1| scaffold1142 92.71 809 58 1 1677  
2484 293167 293975 0.0 1168  
gi|33285929|gb|AY223844.1| scaffold1142 87.61 767 72 17 1700  
2453 293965 293209 0.0 869  
gi|33285929|gb|AY223844.1| scaffold1142 95.22 251 2 3 2761  
3010 186158 186399 5e-105 388  
47  
gi|33285929|gb|AY223844.1| scaffold1142 97.48 119 3 0 2920  
3038 188367 188485 2e-49 204  
gi|33285929|gb|AY223844.1| scaffold215 92.99 799 56 0 1681  
2479 205495 204697 0.0 1168  
gi|33285929|gb|AY223844.1| scaffold215 88.49 773 66 17 1700  
2459 204702 205464 0.0 913  
gi|33285929|gb|AY223844.1| scaffold215 98.25 286 2 3 2754  
3037 87734 87450 9e-138 497  
gi|33285929|gb|AY223844.1| scaffold215 97.22 288 5 3 2755  
3039 486338 486625 7e-134 484  
gi|33285929|gb|AY223844.1| scaffold215 95.89 292 8 4 2755  
3043 284230 284520 2e-129 470  
gi|33285929|gb|AY223844.1| scaffold215 94.75 305 9 7 2755  
3055 163696 163395 7e-129 468  
gi|33285929|gb|AY223844.1| scaffold215 96.48 284 8 2 2755  
3037 512972 513254 7e-129 468  
gi|33285929|gb|AY223844.1| scaffold215 97.54 203 5 0 2755  
2957 42805 42603 9e-93 348  
gi|33285929|gb|AY223844.1| scaffold215 98.43 191 3 0 2797  
2987 442001 442191 2e-89 337  
gi|33285929|gb|AY223844.1| scaffold215 98.83 171 2 0 2866  
3036 42024 41854 6e-80 305  
gi|33285929|gb|AY223844.1| scaffold215 85.85 212 25 2 2828  
3036 543274 543483 2e-54 220  
gi|33285929|gb|AY223844.1| scaffold215 95.88 97 3 1 2761  
2856 261762 261858 6e-35 156  
gi|33285929|gb|AY223844.1| scaffold215 96.74 92 3 0 2866  
2957 174658 174749 2e-34 154  
gi|33285929|gb|AY223844.1| scaffold215 98.63 73 1 0 2964  
3036 174385 174313 4e-27 130  
gi|33285929|gb|AY223844.1| scaffold215 85.60 125 10 5 2827  
2947 270569 270449 2e-25 124  
gi|33285929|gb|AY223844.1| scaffold58 92.99 799 56 0 1682 2480  
449817 450615 0.0 1168  
gi|33285929|gb|AY223844.1| scaffold58 87.86 766 75 12 1704 2459  
450604 449847 0.0 885  
gi|33285929|gb|AY223844.1| scaffold58 92.43 436 33 0 2046 2481



341538 341103 4e-176 625  
gi|33285929|gb|AY223844.1| scaffold58 92.75 414 30 0 1676 2089  
342121 341708 6e-169 601  
gi|33285929|gb|AY223844.1| scaffold58 98.57 279 4 0 2758 3036  
455389 455111 1e-136 494  
gi|33285929|gb|AY223844.1| scaffold58 98.22 281 4 1 2758 3037  
93044 93324 1e-135 490  
gi|33285929|gb|AY223844.1| scaffold58 97.54 284 2 3 2758 3036  
227885 227602 9e-133 481  
gi|33285929|gb|AY223844.1| scaffold58 97.84 278 5 1 2761 3037  
332522 332799 3e-132 479  
gi|33285929|gb|AY223844.1| scaffold58 90.36 363 29 4 1700 2056  
341110 341472 5e-130 472  
gi|33285929|gb|AY223844.1| scaffold58 90.72 345 30 2 2116 2459  
341742 342085 4e-126 459  
48  
gi|33285929|gb|AY223844.1| scaffold58 96.42 279 5 3 2764 3037  
561368 561090 5e-125 455  
gi|33285929|gb|AY223844.1| scaffold58 95.10 286 5 3 2751 3036  
211346 211622 4e-121 442  
gi|33285929|gb|AY223844.1| scaffold58 88.89 288 15 6 2751 3033  
146225 145950 5e-90 339  
gi|33285929|gb|AY223844.1| scaffold58 97.03 202 4 2 2758 2957  
381180 381381 5e-90 339  
gi|33285929|gb|AY223844.1| scaffold58 98.84 172 2 0 2865 3036  
384303 384474 2e-80 307  
gi|33285929|gb|AY223844.1| scaffold58 89.38 160 15 1 2839 2996  
232654 232495 3e-48 200  
gi|33285929|gb|AY223844.1| scaffold58 90.32 93 9 0 2913 3005  
61440 61532 6e-25 122  
gi|33285929|gb|AY223844.1| scaffold58 83.59 128 13 5 2831 2958  
49257 49138 4e-22 113  
gi|33285929|gb|AY223844.1| scaffold58 100.00 35 0 0 3174  
3208 735536 735502 1e-07 65.8  
gi|33285929|gb|AY223844.1| scaffold512 92.98 798 56 0 1683  
2480 331720 332517 0.0 1166  
gi|33285929|gb|AY223844.1| scaffold512 88.72 771 68 13 1700  
2459 332511 331749 0.0 926  
gi|33285929|gb|AY223844.1| scaffold512 97.85 279 4 2 2762  
3040 284675 284399 9e-133 481  
gi|33285929|gb|AY223844.1| scaffold512 96.84 285 8 1 2751  
3035 310425 310708 4e-131 475  
gi|33285929|gb|AY223844.1| scaffold512 97.79 271 5 1 2764  
3034 382233 381964 2e-128 466  
gi|33285929|gb|AY223844.1| scaffold512 96.34 273 9 1 2760  
3031 85106 84834 9e-123 448

gi|33285929|gb|AY223844.1| scaffold512 97.00 200 3 3 2755  
2951 63500 63699 3e-88 333  
gi|33285929|gb|AY223844.1| scaffold512 100.00 35 0 0  
3174 3208 299166 299200 1e-07 65.8  
gi|33285929|gb|AY223844.1| scaffold512 96.97 33 0 1 3168  
3200 299953 299922 2e-04 54.7  
gi|33285929|gb|AY223844.1| scaffold339 92.98 798 56 0 1683  
2480 454006 454803 0.0 1166  
gi|33285929|gb|AY223844.1| scaffold339 88.23 773 68 17 1700  
2459 454797 454035 0.0 902  
gi|33285929|gb|AY223844.1| scaffold339 98.21 280 5 0 2757  
3036 298174 298453 1e-135 490  
gi|33285929|gb|AY223844.1| scaffold339 97.53 283 6 1 2755  
3036 376866 376584 2e-133 483  
gi|33285929|gb|AY223844.1| scaffold339 97.82 275 5 1 2762  
3036 71009 71282 1e-130 473  
gi|33285929|gb|AY223844.1| scaffold339 97.15 281 6 2 2758  
3036 129187 128907 1e-130 473  
gi|33285929|gb|AY223844.1| scaffold339 94.76 286 12 3 2753  
3036 286562 286278 4e-121 442  
gi|33285929|gb|AY223844.1| scaffold339 98.17 218 4 0 2816  
3033 283389 283606 9e-103 381  
49  
gi|33285929|gb|AY223844.1| scaffold339 96.33 109 4 0 2754  
2862 242896 242788 4e-42 180  
gi|33285929|gb|AY223844.1| scaffold339 81.70 153 11 8 2765  
2915 268513 268650 1e-21 111  
gi|33285929|gb|AY223844.1| scaffold339 100.00 33 0 0  
3174 3206 250830 250798 1e-06 62.1  
gi|33285929|gb|AY223844.1| scaffold339 100.00 28 0 0  
3173 3200 250227 250254 8e-04 52.8  
gi|33285929|gb|AY223844.1| scaffold11262 93.07 794 55 0 1683  
2476 1510 2303 0.0 1164  
gi|33285929|gb|AY223844.1| scaffold11262 88.98 771 66 14 1700  
2459 2301 1539 0.0 937  
gi|33285929|gb|AY223844.1| scaffold11262 93.33 345 23 0 1683  
2027 29224 28880 1e-141 510  
gi|33285929|gb|AY223844.1| scaffold11262 98.53 273 4 0 2764  
3036 40389 40661 2e-133 483  
gi|33285929|gb|AY223844.1| scaffold11262 97.51 281 5 2 2758  
3036 42635 42355 3e-132 479  
gi|33285929|gb|AY223844.1| scaffold11262 93.04 316 22 0 2144  
2459 28880 29195 3e-127 462  
gi|33285929|gb|AY223844.1| scaffold11262 91.21 307 27 0 2173  
2479 28767 28461 7e-114 418  
gi|33285929|gb|AY223844.1| scaffold11262 91.39 302 23 3 1700

1998 28466 28767 1e-111 411  
gi|33285929|gb|AY223844.1| scaffold6036 92.98 798 55 1 1683  
2480 45727 46523 0.0 1164  
gi|33285929|gb|AY223844.1| scaffold6036 88.62 747 70 9 1720  
2459 46494 45756 0.0 896  
gi|33285929|gb|AY223844.1| scaffold6036 98.17 273 4 1 2764  
3036 8449 8178 4e-131 475  
gi|33285929|gb|AY223844.1| scaffold6036 95.55 292 9 4 2752  
3040 7491 7201 9e-128 464  
gi|33285929|gb|AY223844.1| scaffold6036 95.67 277 11 1 2761  
3036 41516 41792 1e-121 444  
gi|33285929|gb|AY223844.1| scaffold1268 93.07 794 55 0 1683  
2476 142100 142893 0.0 1164  
gi|33285929|gb|AY223844.1| scaffold1268 88.23 773 68 17 1700  
2459 142891 142129 0.0 902  
gi|33285929|gb|AY223844.1| scaffold1268 97.58 207 4 1 2751  
2957 107871 108076 2e-94 353  
gi|33285929|gb|AY223844.1| scaffold1268 82.75 255 39 5 2755  
3005 96670 96417 6e-55 222  
gi|33285929|gb|AY223844.1| scaffold1268 100.00 33 0 0  
3174 3206 161888 161856 1e-06 62.1  
gi|33285929|gb|AY223844.1| scaffold233 93.07 794 55 0 1683  
2476 26589 25796 0.0 1164  
gi|33285929|gb|AY223844.1| scaffold233 87.71 773 72 17 1700  
2459 25798 26560 0.0 880  
gi|33285929|gb|AY223844.1| scaffold233 98.23 282 3 2 2758  
3037 364534 364253 4e-136 492  
gi|33285929|gb|AY223844.1| scaffold233 97.54 285 6 1 2751  
3034 158188 158472 2e-134 486  
50  
gi|33285929|gb|AY223844.1| scaffold233 97.88 283 3 3 2752  
3032 248750 249031 2e-134 486  
gi|33285929|gb|AY223844.1| scaffold233 97.48 278 6 1 2755  
3031 54423 54146 1e-130 473  
gi|33285929|gb|AY223844.1| scaffold233 97.97 197 4 0 2764  
2960 159685 159489 4e-91 342  
gi|33285929|gb|AY223844.1| scaffold233 100.00 35 0 0  
3174 3208 257039 257005 1e-07 65.8  
gi|33285929|gb|AY223844.1| scaffold167 93.27 788 53 0 1689  
2476 453386 452599 0.0 1164  
gi|33285929|gb|AY223844.1| scaffold167 88.75 773 64 17 1700  
2459 452601 453363 0.0 924  
gi|33285929|gb|AY223844.1| scaffold167 98.62 290 4 0 2752  
3041 15989 15700 8e-143 514  
gi|33285929|gb|AY223844.1| scaffold167 98.63 291 3 1 2751  
3040 254615 254905 8e-143 514

gi|33285929|gb|AY223844.1| scaffold167 98.53 273 4 0 2764  
3036 431717 431989 2e-133 483  
gi|33285929|gb|AY223844.1| scaffold167 98.88 269 3 0 2764  
3032 479440 479708 9e-133 481  
gi|33285929|gb|AY223844.1| scaffold167 96.83 284 7 2 2758  
3040 128797 128515 1e-130 473  
gi|33285929|gb|AY223844.1| scaffold167 97.45 275 5 2 2761  
3033 560162 560436 7e-129 468  
gi|33285929|gb|AY223844.1| scaffold167 96.37 193 7 0 2842  
3034 178654 178846 7e-84 318  
gi|33285929|gb|AY223844.1| scaffold167 96.15 182 5 2 2757  
2936 178472 178653 3e-77 296  
gi|33285929|gb|AY223844.1| scaffold167 84.52 239 22 5 2771  
3005 116776 116549 6e-55 222  
gi|33285929|gb|AY223844.1| scaffold167 87.79 172 21 0 2834  
3005 360952 360781 7e-49 202  
gi|33285929|gb|AY223844.1| scaffold167 88.46 104 12 0 2875  
2978 325628 325525 5e-26 126  
gi|33285929|gb|AY223844.1| scaffold109 93.07 794 55 0 1683  
2476 636499 635706 0.0 1164  
gi|33285929|gb|AY223844.1| scaffold109 90.00 770 54 16 1700  
2456 635708 636467 0.0 976  
gi|33285929|gb|AY223844.1| scaffold109 98.61 288 4 0 2749  
3036 228965 229252 1e-141 510  
gi|33285929|gb|AY223844.1| scaffold109 99.25 266 2 0 2764  
3029 71143 71408 9e-133 481  
gi|33285929|gb|AY223844.1| scaffold109 96.81 282 6 3 2756  
3035 350195 349915 7e-129 468  
gi|33285929|gb|AY223844.1| scaffold109 97.27 183 5 0 2854  
3036 534705 534523 1e-81 311  
gi|33285929|gb|AY223844.1| scaffold7862 92.97 797 55 1 1681  
2476 72166 71370 0.0 1162  
gi|33285929|gb|AY223844.1| scaffold7862 89.00 773 62 16 1700  
2459 71372 72134 0.0 937  
gi|33285929|gb|AY223844.1| scaffold7862 90.15 396 37 2 2085  
2479 71366 70972 8e-143 514  
51  
gi|33285929|gb|AY223844.1| scaffold7862 88.86 359 37 3 1700  
2055 70977 71335 5e-120 438  
gi|33285929|gb|AY223844.1| scaffold7862 93.87 163 10 0 1927  
2089 72327 72165 9e-63 248  
gi|33285929|gb|AY223844.1| scaffold7862 92.25 129 10 0 2123  
2251 72206 72334 3e-43 183  
gi|33285929|gb|AY223844.1| scaffold5913 92.78 803 57 1 1675  
2476 101608 100806 0.0 1162  
gi|33285929|gb|AY223844.1| scaffold5913 88.24 774 67 18 1700

2459 100808 101571 0.0 904  
gi|33285929|gb|AY223844.1| scaffold5913 94.43 305 14 2 2732  
3035 103603 103301 2e-128 466  
gi|33285929|gb|AY223844.1| scaffold4243 92.97 797 55 1 1683  
2479 96190 95395 0.0 1162  
gi|33285929|gb|AY223844.1| scaffold4243 88.96 770 67 15 1700  
2459 95400 96161 0.0 937  
gi|33285929|gb|AY223844.1| scaffold4243 97.86 281 5 1 2755  
3035 123944 123665 7e-134 484  
gi|33285929|gb|AY223844.1| scaffold4243 95.83 288 7 4 2753  
3035 56632 56345 1e-126 460  
gi|33285929|gb|AY223844.1| scaffold4243 98.71 155 2 0 2881  
3035 61705 61551 4e-71 276  
gi|33285929|gb|AY223844.1| scaffold4243 97.45 157 3 1 2761  
2916 34749 34905 3e-68 267  
gi|33285929|gb|AY223844.1| scaffold4243 98.04 51 1 0 2839  
2889 62239 62189 6e-15 89.8  
gi|33285929|gb|AY223844.1| scaffold2277 92.96 796 56 0 1681  
2476 132988 133783 0.0 1162  
gi|33285929|gb|AY223844.1| scaffold2277 88.89 774 61 19 1700  
2459 133781 133019 0.0 929  
gi|33285929|gb|AY223844.1| scaffold2277 95.60 182 6 2 2757  
2936 79484 79665 2e-75 291  
gi|33285929|gb|AY223844.1| scaffold2277 100.00 123 0 0  
2911 3033 201287 201409 1e-56 228  
gi|33285929|gb|AY223844.1| scaffold2277 84.07 226 34 2 2756  
2980 160013 160237 3e-53 217  
gi|33285929|gb|AY223844.1| scaffold2277 97.80 91 2 0 2764  
2854 201140 201230 2e-35 158  
gi|33285929|gb|AY223844.1| scaffold2277 96.39 83 3 0 3208  
3290 32664 32582 2e-29 137  
gi|33285929|gb|AY223844.1| scaffold1057 93.06 793 55 0 1683  
2475 64854 64062 0.0 1162  
gi|33285929|gb|AY223844.1| scaffold1057 88.96 770 64 16 1700  
2457 64063 64823 0.0 933  
gi|33285929|gb|AY223844.1| scaffold1057 98.94 284 1 2 2755  
3036 69452 69169 1e-140 507  
gi|33285929|gb|AY223844.1| scaffold1057 98.57 279 4 0 2757  
3035 71813 72091 1e-136 494  
gi|33285929|gb|AY223844.1| scaffold1057 96.88 288 5 4 2751  
3035 202803 203089 3e-132 479  
gi|33285929|gb|AY223844.1| scaffold1057 92.66 286 7 8 2753  
3036 158736 158463 2e-108 399  
52  
gi|33285929|gb|AY223844.1| scaffold1057 100.00 33 0 0  
3174 3206 262369 262401 1e-06 62.1

gi|33285929|gb|AY223844.1| scaffold5 93.08 795 52 3 1683 2476  
380096 379304 0.0 1162  
gi|33285929|gb|AY223844.1| scaffold5 91.47 809 68 1 1675 2483  
526696 525889 0.0 1112  
gi|33285929|gb|AY223844.1| scaffold5 88.34 772 68 16 1700 2459  
525898 526659 0.0 907  
gi|33285929|gb|AY223844.1| scaffold5 88.21 772 69 16 1700 2459  
379306 380067 0.0 902  
gi|33285929|gb|AY223844.1| scaffold5 96.52 287 7 3 2755 3038  
532943 533229 5e-130 472  
gi|33285929|gb|AY223844.1| scaffold5 96.45 282 7 3 2758 3037  
972695 972975 3e-127 462  
gi|33285929|gb|AY223844.1| scaffold5 99.18 245 2 0 2792 3036  
143789 144033 4e-121 442  
gi|33285929|gb|AY223844.1| scaffold5 94.04 285 14 3 2754 3035  
831931 831647 3e-117 429  
gi|33285929|gb|AY223844.1| scaffold5 94.16 274 11 3 2765 3037  
579573 579842 3e-112 412  
gi|33285929|gb|AY223844.1| scaffold5 91.89 296 6 8 2758 3035  
112849 113144 9e-108 398  
gi|33285929|gb|AY223844.1| scaffold5 92.94 255 7 3 2752 3004  
72630 72385 1e-96 361  
gi|33285929|gb|AY223844.1| scaffold5 98.77 162 2 0 2875 3036  
525895 525734 6e-75 289  
gi|33285929|gb|AY223844.1| scaffold5 96.09 128 5 0 2755 2882  
526816 526689 4e-51 209  
gi|33285929|gb|AY223844.1| scaffold5 82.73 220 34 1 2757 2976  
84813 84598 5e-46 193  
gi|33285929|gb|AY223844.1| scaffold5 100.00 92 0 0 2944  
3035 113147 113238 2e-39 171  
gi|33285929|gb|AY223844.1| scaffold5 93.68 95 3 3 2755 2846  
789562 789468 6e-30 139  
gi|33285929|gb|AY223844.1| scaffold5 100.00 46 0 0 2988  
3033 337351 337396 8e-14 86.1  
gi|33285929|gb|AY223844.1| scaffold4259 92.32 820 55 6 1676  
2490 61643 60827 0.0 1160  
gi|33285929|gb|AY223844.1| scaffold4259 89.01 755 67 11 1713  
2459 60861 61607 0.0 922  
gi|33285929|gb|AY223844.1| scaffold4259 96.96 296 6 3 2746  
3040 112414 112121 1e-136 494  
gi|33285929|gb|AY223844.1| scaffold4259 95.76 283 8 4 2754  
3034 111025 110745 2e-124 453  
gi|33285929|gb|AY223844.1| scaffold4259 94.57 276 13 2 2758  
3031 95099 95374 4e-116 425  
gi|33285929|gb|AY223844.1| scaffold383 92.86 798 57 0 1683  
2480 271565 272362 0.0 1160

gi|33285929|gb|AY223844.1| scaffold383 91.63 753 58 4 1700  
2449 434492 433742 0.0 1038  
gi|33285929|gb|AY223844.1| scaffold383 88.46 771 70 13 1700  
2459 272356 271594 0.0 915  
53  
gi|33285929|gb|AY223844.1| scaffold383 88.28 768 70 13 1722  
2480 433742 434498 0.0 904  
gi|33285929|gb|AY223844.1| scaffold383 91.81 452 37 0 2027  
2478 299060 299511 2e-178 632  
gi|33285929|gb|AY223844.1| scaffold383 98.57 280 4 0 2758  
3037 202095 201816 3e-137 496  
gi|33285929|gb|AY223844.1| scaffold383 91.64 359 27 3 1700  
2055 299507 299149 1e-136 494  
gi|33285929|gb|AY223844.1| scaffold383 97.88 283 6 0 2752  
3034 201101 200819 1e-135 490  
gi|33285929|gb|AY223844.1| scaffold383 97.22 288 6 2 2750  
3037 349651 349936 2e-134 486  
gi|33285929|gb|AY223844.1| scaffold383 97.51 281 7 0 2755  
3035 380786 381066 9e-133 481  
gi|33285929|gb|AY223844.1| scaffold383 97.18 284 5 3 2755  
3036 398223 398505 1e-131 477  
gi|33285929|gb|AY223844.1| scaffold383 97.16 282 5 3 2758  
3037 417191 416911 1e-130 473  
gi|33285929|gb|AY223844.1| scaffold383 96.44 281 8 2 2758  
3036 236589 236869 3e-127 462  
gi|33285929|gb|AY223844.1| scaffold383 91.94 310 25 0 1683  
1992 433365 433674 7e-119 435  
gi|33285929|gb|AY223844.1| scaffold383 94.31 281 16 0 2179  
2459 433674 433394 9e-118 431  
gi|33285929|gb|AY223844.1| scaffold383 93.10 174 9 3 1683  
1855 298811 298982 7e-64 252  
gi|33285929|gb|AY223844.1| scaffold383 96.55 145 5 0 2314  
2458 298984 298840 2e-60 241  
gi|33285929|gb|AY223844.1| scaffold383 87.79 172 16 3 2759  
2926 90947 91117 3e-47 196  
gi|33285929|gb|AY223844.1| scaffold383 99.04 104 1 0 2933  
3036 171650 171547 2e-44 187  
gi|33285929|gb|AY223844.1| scaffold383 90.43 94 8 1 2779  
2872 258031 258123 6e-25 122  
gi|33285929|gb|AY223844.1| scaffold383 94.64 56 1 2 2758  
2811 171704 171649 8e-14 86.1  
gi|33285929|gb|AY223844.1| scaffold383 100.00 35 0 0  
3174 3208 342615 342649 1e-07 65.8  
gi|33285929|gb|AY223844.1| scaffold383 100.00 34 0 0  
3173 3206 431385 431352 4e-07 63.9  
gi|33285929|gb|AY223844.1| scaffold11340 92.95 794 56 0 1683

2476 8327 9120 0.0 1158  
gi|33285929|gb|AY223844.1| scaffold11340 89.29 756 65 9 1712  
2459 9103 8356 0.0 935  
gi|33285929|gb|AY223844.1| scaffold7471 92.86 798 55 2 1683  
2479 22419 21623 0.0 1158  
gi|33285929|gb|AY223844.1| scaffold7471 88.76 774 62 20 1700  
2459 21628 22390 0.0 924  
gi|33285929|gb|AY223844.1| scaffold7416 92.85 797 57 0 1683  
2479 43763 42967 0.0 1158  
gi|33285929|gb|AY223844.1| scaffold7416 88.82 778 68 14 1693  
2459 42965 43734 0.0 939  
54  
gi|33285929|gb|AY223844.1| scaffold7416 92.68 82 6 0 3209  
3290 51815 51896 8e-24 119  
gi|33285929|gb|AY223844.1| scaffold5912 92.85 797 57 0 1683  
2479 80693 79897 0.0 1158  
gi|33285929|gb|AY223844.1| scaffold5912 88.23 773 68 17 1700  
2459 79902 80664 0.0 902  
gi|33285929|gb|AY223844.1| scaffold5912 87.66 154 19 0 2842  
2995 79563 79410 4e-42 180  
gi|33285929|gb|AY223844.1| scaffold3869 92.56 806 60 0 1676  
2481 73814 73009 0.0 1158  
gi|33285929|gb|AY223844.1| scaffold3869 87.97 773 70 17 1700  
2459 73016 73778 0.0 891  
gi|33285929|gb|AY223844.1| scaffold3869 97.45 274 5 2 2757  
3028 125203 124930 2e-128 466  
gi|33285929|gb|AY223844.1| scaffold2293 92.85 797 57 0 1683  
2479 94976 95772 0.0 1158  
gi|33285929|gb|AY223844.1| scaffold2293 88.36 773 67 17 1700  
2459 95767 95005 0.0 907  
gi|33285929|gb|AY223844.1| scaffold2293 97.22 288 7 1 2751  
3037 65369 65082 2e-134 486  
gi|33285929|gb|AY223844.1| scaffold2293 96.21 290 7 4 2758  
3044 147256 146968 5e-130 472  
gi|33285929|gb|AY223844.1| scaffold2293 97.80 273 3 2 2764  
3034 209606 209877 7e-129 468  
gi|33285929|gb|AY223844.1| scaffold2293 93.60 172 4 3 2871  
3035 105142 105313 3e-63 250  
gi|33285929|gb|AY223844.1| scaffold935 92.95 794 56 0 1683  
2476 355730 354937 0.0 1158  
gi|33285929|gb|AY223844.1| scaffold935 88.54 768 75 10 1700  
2459 354939 355701 0.0 920  
gi|33285929|gb|AY223844.1| scaffold935 96.94 294 6 3 2753  
3044 133955 134247 1e-135 490  
gi|33285929|gb|AY223844.1| scaffold935 97.86 281 5 1 2761  
3040 121635 121355 7e-134 484



gi|33285929|gb|AY223844.1| scaffold935 96.89 289 5 4 2755  
3040 31881 31594 9e-133 481  
gi|33285929|gb|AY223844.1| scaffold935 97.15 281 7 1 2755  
3034 230034 230314 1e-130 473  
gi|33285929|gb|AY223844.1| scaffold935 90.72 237 21 1 2760  
2995 216087 215851 9e-83 315  
gi|33285929|gb|AY223844.1| scaffold935 95.68 185 5 3 2755  
2936 304690 304874 1e-76 294  
gi|33285929|gb|AY223844.1| scaffold2777 92.86 798 53 3 1681  
2476 73124 72329 0.0 1157  
gi|33285929|gb|AY223844.1| scaffold2777 92.61 798 59 0 1679  
2476 75795 76592 0.0 1149  
gi|33285929|gb|AY223844.1| scaffold2777 88.65 758 64 17 1713  
2459 72347 73093 0.0 904  
gi|33285929|gb|AY223844.1| scaffold2777 87.84 773 71 17 1700  
2459 76590 75828 0.0 885  
gi|33285929|gb|AY223844.1| scaffold2777 99.27 274 2 0 2764  
3037 71706 71979 3e-137 496  
55  
gi|33285929|gb|AY223844.1| scaffold2777 97.40 269 7 0 2764  
3032 91209 90941 4e-126 459  
gi|33285929|gb|AY223844.1| scaffold2777 98.64 147 1 1 2891  
3036 42548 42402 4e-66 259  
gi|33285929|gb|AY223844.1| scaffold2777 96.18 131 4 1 2853  
2983 6000 5871 3e-52 213  
gi|33285929|gb|AY223844.1| scaffold2777 92.86 70 3 2 2758  
2825 5106 5175 3e-18 100  
gi|33285929|gb|AY223844.1| scaffold792 92.85 797 57 0 1683  
2479 21861 22657 0.0 1157  
gi|33285929|gb|AY223844.1| scaffold792 89.40 811 71 5 1681  
2476 365434 364624 0.0 1009  
gi|33285929|gb|AY223844.1| scaffold792 89.45 758 58 16 1713  
2459 22636 21890 0.0 937  
gi|33285929|gb|AY223844.1| scaffold792 85.95 783 82 15 1700  
2459 364626 365403 0.0 811  
gi|33285929|gb|AY223844.1| scaffold792 99.64 275 1 0 2764  
3038 191722 191448 2e-139 503  
gi|33285929|gb|AY223844.1| scaffold792 98.23 282 5 0 2751  
3032 258516 258235 1e-136 494  
gi|33285929|gb|AY223844.1| scaffold792 97.86 280 5 1 2758  
3036 199044 199323 2e-133 483  
gi|33285929|gb|AY223844.1| scaffold792 98.18 274 5 0 2764  
3037 61581 61308 3e-132 479  
gi|33285929|gb|AY223844.1| scaffold792 97.16 282 8 0 2755  
3036 100298 100579 1e-131 477  
gi|33285929|gb|AY223844.1| scaffold792 95.99 274 9 2 2761

3033 136376 136104 1e-121 444  
gi|33285929|gb|AY223844.1| scaffold792 91.55 284 3 9 2755  
3036 170495 170231 5e-100 372  
gi|33285929|gb|AY223844.1| scaffold792 95.89 146 2 4 2752  
2893 109616 109761 3e-58 233  
gi|33285929|gb|AY223844.1| scaffold792 84.72 216 24 5 2789  
3001 282284 282493 2e-50 207  
gi|33285929|gb|AY223844.1| scaffold792 87.13 171 21 1 2831  
3000 46100 45930 5e-46 193  
gi|33285929|gb|AY223844.1| scaffold792 84.85 132 17 2 1542  
1670 309560 309691 4e-27 130  
gi|33285929|gb|AY223844.1| scaffold792 100.00 33 0 0  
3173 3205 58551 58583 1e-06 62.1  
gi|33285929|gb|AY223844.1| scaffold725\_0 92.95 794 55 1 1683  
2476 157087 156295 0.0 1157  
gi|33285929|gb|AY223844.1| scaffold725\_0 89.62 771 57 17 1700  
2457 156297 157057 0.0 959  
gi|33285929|gb|AY223844.1| scaffold725\_0 95.16 289 10 4 2752  
3036 48615 48327 2e-124 453  
gi|33285929|gb|AY223844.1| scaffold725\_0 93.90 164 5 4 2751  
2910 81779 81941 4e-61 243  
gi|33285929|gb|AY223844.1| scaffold725\_0 100.00 83 0 0  
2944 3026 81941 82023 2e-34 154  
gi|33285929|gb|AY223844.1| scaffold725\_0 86.99 123 13 3 2812  
2934 112539 112420 8e-29 135  
56  
gi|33285929|gb|AY223844.1| scaffold725\_0 100.00 44 0 0  
2994 3037 82603 82646 1e-12 82.4  
gi|33285929|gb|AY223844.1| scaffold504 93.44 778 51 0 1681  
2458 415569 414792 0.0 1157  
gi|33285929|gb|AY223844.1| scaffold504 89.01 755 67 11 1713  
2459 414792 415538 0.0 922  
gi|33285929|gb|AY223844.1| scaffold504 99.29 281 2 0 2751  
3031 66574 66294 4e-141 508  
gi|33285929|gb|AY223844.1| scaffold504 98.93 280 3 0 2751  
3030 310878 310599 7e-139 501  
gi|33285929|gb|AY223844.1| scaffold504 96.26 294 8 3 2755  
3046 54878 55170 3e-132 479  
gi|33285929|gb|AY223844.1| scaffold504 97.81 274 5 1 2761  
3033 220918 221191 5e-130 472  
gi|33285929|gb|AY223844.1| scaffold504 97.10 276 6 2 2761  
3035 428046 427772 9e-128 464  
gi|33285929|gb|AY223844.1| scaffold504 97.50 200 5 0 2750  
2949 162979 163178 4e-91 342  
gi|33285929|gb|AY223844.1| scaffold504 96.59 205 6 1 2753  
2957 344567 344770 5e-90 339

gi|33285929|gb|AY223844.1| scaffold504 97.27 183 2 2 2856  
3035 344780 344962 2e-80 307  
gi|33285929|gb|AY223844.1| scaffold504 88.17 186 20 2 1691  
1874 208328 208513 2e-54 220  
gi|33285929|gb|AY223844.1| scaffold504 95.00 140 5 2 2750  
2889 26678 26815 7e-54 219  
gi|33285929|gb|AY223844.1| scaffold504 88.96 163 17 1 2298  
2459 208512 208350 3e-48 200  
gi|33285929|gb|AY223844.1| scaffold504 98.97 97 1 0 2934  
3030 26995 27091 2e-40 174  
gi|33285929|gb|AY223844.1| scaffold260 92.84 796 57 0 1683  
2478 148175 148970 0.0 1157  
gi|33285929|gb|AY223844.1| scaffold260 90.69 763 68 3 1700  
2459 349446 350208 0.0 1014  
gi|33285929|gb|AY223844.1| scaffold260 88.32 805 76 12 1681  
2476 350239 349444 0.0 952  
gi|33285929|gb|AY223844.1| scaffold260 89.11 771 65 13 1700  
2459 148966 148204 0.0 942  
gi|33285929|gb|AY223844.1| scaffold260 93.45 443 27 1 2034  
2476 474368 474808 0.0 658  
gi|33285929|gb|AY223844.1| scaffold260 98.94 282 3 0 2751  
3032 309484 309203 5e-140 505  
gi|33285929|gb|AY223844.1| scaffold260 99.28 278 1 1 2761  
3037 19188 18911 7e-139 501  
gi|33285929|gb|AY223844.1| scaffold260 98.57 280 2 2 2758  
3035 130987 130708 1e-136 494  
gi|33285929|gb|AY223844.1| scaffold260 98.57 279 3 1 2758  
3036 139383 139660 4e-136 492  
gi|33285929|gb|AY223844.1| scaffold260 97.22 288 3 4 2755  
3037 222401 222114 2e-133 483  
gi|33285929|gb|AY223844.1| scaffold260 98.17 273 5 0 2764  
3036 398817 398545 1e-131 477  
57  
gi|33285929|gb|AY223844.1| scaffold260 90.81 359 30 3 1700  
2055 474806 474448 1e-131 477  
gi|33285929|gb|AY223844.1| scaffold260 96.52 287 6 4 2754  
3037 51056 50771 5e-130 472  
gi|33285929|gb|AY223844.1| scaffold260 96.77 279 6 3 2758  
3034 445669 445946 3e-127 462  
gi|33285929|gb|AY223844.1| scaffold260 88.04 368 23 7 1681  
2048 430870 431216 2e-113 416  
gi|33285929|gb|AY223844.1| scaffold260 90.78 293 27 0 1683  
1975 474030 474322 4e-106 392  
gi|33285929|gb|AY223844.1| scaffold260 88.02 334 19 7 2123  
2456 431216 430904 4e-101 375  
gi|33285929|gb|AY223844.1| scaffold260 92.08 265 19 2 2196

2459 474322 474059 5e-100 372  
gi|33285929|gb|AY223844.1| scaffold260 95.74 188 5 3 2754  
2939 225478 225664 3e-78 300  
gi|33285929|gb|AY223844.1| scaffold1141 92.84 796 55 2 1683  
2477 47056 47850 0.0 1155  
gi|33285929|gb|AY223844.1| scaffold1141 88.30 778 66 19 1696  
2459 47851 47085 0.0 909  
gi|33285929|gb|AY223844.1| scaffold1141 99.26 272 2 0 2764  
3035 174231 173960 4e-136 492  
gi|33285929|gb|AY223844.1| scaffold1141 96.11 283 7 2 2755  
3036 223369 223090 4e-126 459  
gi|33285929|gb|AY223844.1| scaffold1141 90.85 142 13 0 2760  
2901 146588 146729 2e-45 191  
gi|33285929|gb|AY223844.1| scaffold1141 85.71 133 19 0 2903  
3035 146933 147065 2e-30 141  
gi|33285929|gb|AY223844.1| scaffold20954 92.72 797 58 0 1683  
2479 4197 3401 0.0 1153  
gi|33285929|gb|AY223844.1| scaffold20954 88.20 771 72 14 1700  
2459 3406 4168 0.0 904  
gi|33285929|gb|AY223844.1| scaffold14412 91.97 822 64 2 1663  
2483 9055 8235 0.0 1153  
gi|33285929|gb|AY223844.1| scaffold14412 87.98 774 68 20 1700  
2459 8244 9006 0.0 893  
gi|33285929|gb|AY223844.1| scaffold6072 92.83 795 55 2 1683  
2476 37700 38493 0.0 1153  
gi|33285929|gb|AY223844.1| scaffold6072 88.23 756 71 14 1713  
2459 38475 37729 0.0 887  
gi|33285929|gb|AY223844.1| scaffold6072 96.80 281 7 2 2758  
3036 7335 7615 7e-129 468  
gi|33285929|gb|AY223844.1| scaffold5058 92.83 795 56 1 1683  
2476 54350 55144 0.0 1153  
gi|33285929|gb|AY223844.1| scaffold5058 88.76 774 63 18 1700  
2459 55142 54379 0.0 926  
gi|33285929|gb|AY223844.1| scaffold5058 98.94 283 2 1 2754  
3036 109744 110025 5e-140 505  
gi|33285929|gb|AY223844.1| scaffold4699 92.72 797 58 0 1683  
2479 54473 53677 0.0 1153  
gi|33285929|gb|AY223844.1| scaffold4699 88.20 771 72 15 1700  
2459 53682 54444 0.0 904  
58  
gi|33285929|gb|AY223844.1| scaffold4699 99.65 283 1 0 2753  
3035 52343 52061 7e-144 518  
gi|33285929|gb|AY223844.1| scaffold4699 97.53 283 4 3 2755  
3034 33881 34163 9e-133 481  
gi|33285929|gb|AY223844.1| scaffold4699 95.87 121 4 1 2757  
2877 146241 146360 1e-46 195

gi|33285929|gb|AY223844.1| scaffold4423 92.83 795 56 1 1683  
2476 88109 87315 0.0 1153  
gi|33285929|gb|AY223844.1| scaffold4423 88.36 756 73 10 1712  
2459 87332 88080 0.0 896  
gi|33285929|gb|AY223844.1| scaffold4423 95.74 282 8 1 2752  
3033 62152 61875 7e-124 451  
gi|33285929|gb|AY223844.1| scaffold3258 92.83 795 55 2 1683  
2476 23009 22216 0.0 1153  
gi|33285929|gb|AY223844.1| scaffold3258 88.30 769 75 12 1700  
2459 22218 22980 0.0 909  
gi|33285929|gb|AY223844.1| scaffold3258 92.16 587 44 2 1683  
2267 119100 119686 0.0 830  
gi|33285929|gb|AY223844.1| scaffold3258 87.41 556 54 10 1910  
2457 119678 119131 1e-176 627  
gi|33285929|gb|AY223844.1| scaffold3258 98.93 281 2 1 2755  
3034 222375 222095 7e-139 501  
gi|33285929|gb|AY223844.1| scaffold3258 98.55 276 3 1 2764  
3039 217855 218129 2e-134 486  
gi|33285929|gb|AY223844.1| scaffold3258 97.87 282 4 2 2764  
3044 226725 227005 2e-134 486  
gi|33285929|gb|AY223844.1| scaffold3258 96.83 284 7 2 2754  
3036 59098 58816 1e-130 473  
gi|33285929|gb|AY223844.1| scaffold3258 98.86 263 3 0 2774  
3036 82885 82623 2e-129 470  
gi|33285929|gb|AY223844.1| scaffold3258 96.81 282 7 2 2757  
3036 108027 107746 2e-129 470  
gi|33285929|gb|AY223844.1| scaffold3258 96.75 277 9 0 2754  
3030 80414 80690 3e-127 462  
gi|33285929|gb|AY223844.1| scaffold3258 96.36 275 8 2 2751  
3024 168286 168013 7e-124 451  
gi|33285929|gb|AY223844.1| scaffold3258 96.01 276 8 3 2761  
3033 278380 278105 3e-122 446  
gi|33285929|gb|AY223844.1| scaffold3258 93.82 275 13 4 2752  
3022 139059 138785 1e-111 411  
gi|33285929|gb|AY223844.1| scaffold3258 93.05 187 13 0 2256  
2442 122075 122261 2e-70 274  
gi|33285929|gb|AY223844.1| scaffold3258 90.37 187 18 0 1729  
1915 122261 122075 3e-62 246  
gi|33285929|gb|AY223844.1| scaffold3197 92.73 798 57 1 1683  
2479 62631 61834 0.0 1153  
gi|33285929|gb|AY223844.1| scaffold3197 88.45 779 70 15 1693  
2459 61832 62602 0.0 922  
gi|33285929|gb|AY223844.1| scaffold3197 90.72 291 16 4 2751  
3036 158536 158252 1e-101 377  
gi|33285929|gb|AY223844.1| scaffold3029 92.83 795 55 2 1683  
2476 183973 183180 0.0 1153

gi|33285929|gb|AY223844.1| scaffold3029 87.35 775 71 21 1700  
2459 183182 183944 0.0 863  
gi|33285929|gb|AY223844.1| scaffold3029 96.86 287 7 2 2758  
3042 175159 175445 3e-132 479  
gi|33285929|gb|AY223844.1| scaffold3029 96.32 272 10 0 2764  
3035 94837 95108 9e-123 448  
gi|33285929|gb|AY223844.1| scaffold2052 92.74 799 54 4 1683  
2479 215837 216633 0.0 1153  
gi|33285929|gb|AY223844.1| scaffold2052 88.63 774 63 20 1700  
2459 216628 215866 0.0 918  
gi|33285929|gb|AY223844.1| scaffold2052 97.92 289 5 1 2751  
3038 221735 222023 2e-138 499  
gi|33285929|gb|AY223844.1| scaffold2052 96.89 289 5 4 2752  
3036 160604 160316 9e-133 481  
gi|33285929|gb|AY223844.1| scaffold2052 98.18 274 5 0 2764  
3037 200753 200480 3e-132 479  
gi|33285929|gb|AY223844.1| scaffold2052 92.59 189 5 4 2750  
2935 138126 137944 3e-67 263  
gi|33285929|gb|AY223844.1| scaffold2052 98.95 95 1 0 2930  
3024 133835 133741 2e-39 171  
gi|33285929|gb|AY223844.1| scaffold1845 92.82 794 57 0 1683  
2476 50124 50917 0.0 1153  
gi|33285929|gb|AY223844.1| scaffold1845 88.87 773 63 17 1700  
2459 50915 50153 0.0 931  
gi|33285929|gb|AY223844.1| scaffold1845 98.95 285 3 0 2752  
3036 134818 134534 1e-141 510  
gi|33285929|gb|AY223844.1| scaffold1845 98.23 283 3 2 2758  
3038 181880 182162 1e-136 494  
gi|33285929|gb|AY223844.1| scaffold1845 96.56 291 7 2 2749  
3038 182540 182252 3e-132 479  
gi|33285929|gb|AY223844.1| scaffold1845 97.32 261 6 1 2751  
3010 80695 80955 4e-121 442  
gi|33285929|gb|AY223844.1| scaffold1682 92.84 796 54 3 1683  
2476 38746 39540 0.0 1153  
gi|33285929|gb|AY223844.1| scaffold1682 88.92 758 63 15 1713  
2459 39522 38775 0.0 915  
gi|33285929|gb|AY223844.1| scaffold1682 97.92 289 1 5 2750  
3034 236008 236295 3e-137 496  
gi|33285929|gb|AY223844.1| scaffold1682 96.32 299 9 2 2744  
3040 113084 112786 1e-135 490  
gi|33285929|gb|AY223844.1| scaffold1682 96.52 287 6 4 2758  
3041 251554 251839 5e-130 472  
gi|33285929|gb|AY223844.1| scaffold1682 97.65 213 3 2 2758  
2968 244420 244208 9e-98 364  
gi|33285929|gb|AY223844.1| scaffold1682 96.52 201 5 2 2758

2957 81702 81901 9e-88 331  
gi|33285929|gb|AY223844.1| scaffold1682 88.62 167 15 1 2821  
2987 213140 213302 3e-48 200  
gi|33285929|gb|AY223844.1| scaffold1467 92.73 798 57 1 1683  
2480 261592 260796 0.0 1153  
gi|33285929|gb|AY223844.1| scaffold1467 87.99 766 79 10 1700  
2457 260802 261562 0.0 894  
60  
gi|33285929|gb|AY223844.1| scaffold1467 100.00 273 0 0  
2764 3036 146573 146845 5e-140 505  
gi|33285929|gb|AY223844.1| scaffold1467 98.26 287 2 3 2751  
3035 288907 288622 2e-138 499  
gi|33285929|gb|AY223844.1| scaffold1467 98.11 212 4 0 2825  
3036 85445 85234 2e-99 370  
gi|33285929|gb|AY223844.1| scaffold1467 94.74 152 6 2 2758  
2907 233071 233222 7e-59 235  
gi|33285929|gb|AY223844.1| scaffold1467 93.90 82 5 0 2830  
2911 44972 45053 2e-25 124  
gi|33285929|gb|AY223844.1| scaffold1287 92.82 794 57 0 1683  
2476 73413 72620 0.0 1153  
gi|33285929|gb|AY223844.1| scaffold1287 92.98 741 52 0 1683  
2423 1356 2096 0.0 1083  
gi|33285929|gb|AY223844.1| scaffold1287 88.46 771 70 14 1700  
2459 72622 73384 0.0 915  
gi|33285929|gb|AY223844.1| scaffold1287 89.18 721 60 13 1748  
2459 2096 1385 0.0 885  
gi|33285929|gb|AY223844.1| scaffold1287 84.53 181 12 5 2820  
3000 106875 106711 1e-37 165  
gi|33285929|gb|AY223844.1| scaffold1287 97.96 49 1 0 2761  
2809 116662 116614 8e-14 86.1  
gi|33285929|gb|AY223844.1| scaffold1220 92.82 794 57 0 1683  
2476 91910 92703 0.0 1153  
gi|33285929|gb|AY223844.1| scaffold1220 88.17 769 72 13 1700  
2457 92701 91941 0.0 900  
gi|33285929|gb|AY223844.1| scaffold1220 91.30 299 5 8 2758  
3035 185481 185779 5e-105 388  
gi|33285929|gb|AY223844.1| scaffold1220 95.98 224 8 1 2814  
3036 99280 99057 3e-97 363  
gi|33285929|gb|AY223844.1| scaffold1220 90.51 274 15 4 2751  
3019 213858 214125 7e-94 351  
gi|33285929|gb|AY223844.1| scaffold637 92.82 794 57 0 1683  
2476 270349 271142 0.0 1153  
gi|33285929|gb|AY223844.1| scaffold637 87.45 773 74 17 1700  
2459 271140 270378 0.0 869  
gi|33285929|gb|AY223844.1| scaffold637 95.50 289 8 4 2752  
3035 213388 213100 1e-125 457

gi|33285929|gb|AY223844.1| scaffold637 95.10 286 11 3 2754  
3036 315857 315572 9e-123 448  
gi|33285929|gb|AY223844.1| scaffold637 94.83 290 10 5 2758  
3043 371891 371603 9e-123 448  
gi|33285929|gb|AY223844.1| scaffold637 97.69 216 5 0 2821  
3036 8305 8520 5e-100 372  
gi|33285929|gb|AY223844.1| scaffold637 89.58 96 9 1 1683  
1778 389731 389825 2e-24 121  
gi|33285929|gb|AY223844.1| scaffold573 92.74 799 55 3 1681  
2479 332503 331708 0.0 1153  
gi|33285929|gb|AY223844.1| scaffold573 87.55 779 74 17 1693  
2458 331706 332474 0.0 880  
gi|33285929|gb|AY223844.1| scaffold573 97.59 290 5 2 2758  
3046 272897 272609 3e-137 496  
61  
gi|33285929|gb|AY223844.1| scaffold573 97.89 284 3 2 2753  
3036 324339 324619 5e-135 488  
gi|33285929|gb|AY223844.1| scaffold573 98.21 280 2 3 2757  
3034 280457 280735 2e-134 486  
gi|33285929|gb|AY223844.1| scaffold573 97.86 280 6 0 2753  
3032 47991 48270 7e-134 484  
gi|33285929|gb|AY223844.1| scaffold573 97.49 279 7 0 2751  
3029 412088 411810 1e-131 477  
gi|33285929|gb|AY223844.1| scaffold573 97.37 38 1 0 3171  
3208 377553 377590 1e-07 65.8  
gi|33285929|gb|AY223844.1| scaffold185 92.83 795 56 1 1683  
2476 1002057 1001263 0.0 1153  
gi|33285929|gb|AY223844.1| scaffold185 88.59 771 69 14 1700  
2459 1001265 1002027 0.0 920  
gi|33285929|gb|AY223844.1| scaffold185 98.92 277 3 0 2751  
3027 42815 42539 3e-137 496  
gi|33285929|gb|AY223844.1| scaffold185 97.92 288 2 4 2751  
3034 241085 240798 3e-137 496  
gi|33285929|gb|AY223844.1| scaffold185 98.56 277 3 1 2758  
3033 757074 757350 5e-135 488  
gi|33285929|gb|AY223844.1| scaffold185 96.85 286 5 4 2752  
3034 455239 454955 4e-131 475  
gi|33285929|gb|AY223844.1| scaffold185 97.06 272 7 1 2761  
3031 814001 814272 1e-125 457  
gi|33285929|gb|AY223844.1| scaffold185 90.17 295 13 7 2758  
3036 764381 764675 2e-99 370  
gi|33285929|gb|AY223844.1| scaffold185 98.52 135 1 1 2904  
3037 447579 447445 2e-59 237  
gi|33285929|gb|AY223844.1| scaffold185 87.79 172 21 0 2834  
3005 737399 737228 7e-49 202  
gi|33285929|gb|AY223844.1| scaffold185 84.86 185 17 8 2755



2934 747768 747946 5e-41 176  
gi|33285929|gb|AY223844.1| scaffold185 87.50 152 16 3 2758  
2906 448675 448524 6e-40 172  
gi|33285929|gb|AY223844.1| scaffold185 85.51 138 18 1 2861  
2996 535025 535162 5e-31 143  
gi|33285929|gb|AY223844.1| scaffold185 100.00 34 0 0  
3173 3206 27925 27892 4e-07 63.9  
gi|33285929|gb|AY223844.1| scaffold123 92.72 797 58 0 1683  
2479 629074 629870 0.0 1153  
gi|33285929|gb|AY223844.1| scaffold123 88.21 772 66 19 1700  
2457 629865 629105 0.0 898  
gi|33285929|gb|AY223844.1| scaffold123 91.98 524 41 1 1936  
2459 162240 162762 0.0 736  
gi|33285929|gb|AY223844.1| scaffold123 87.02 570 53 15 1676  
2235 162798 162240 1e-175 623  
gi|33285929|gb|AY223844.1| scaffold123 92.67 423 28 3 1700  
2119 161817 162239 4e-171 608  
gi|33285929|gb|AY223844.1| scaffold123 90.98 366 33 0 2116  
2481 162175 161810 1e-136 494  
gi|33285929|gb|AY223844.1| scaffold123 98.53 273 4 0 2764  
3036 53993 53721 2e-133 483  
62  
gi|33285929|gb|AY223844.1| scaffold123 97.20 286 6 2 2752  
3036 101978 102262 2e-133 483  
gi|33285929|gb|AY223844.1| scaffold123 95.49 288 8 4 2752  
3036 582648 582933 5e-125 455  
gi|33285929|gb|AY223844.1| scaffold123 95.05 202 8 2 2758  
2957 608333 608534 3e-83 316  
gi|33285929|gb|AY223844.1| scaffold123 97.14 35 1 0 3174  
3208 6938 6972 5e-06 60.2  
gi|33285929|gb|AY223844.1| scaffold111 92.72 797 58 0 1683  
2479 128067 128863 0.0 1153  
gi|33285929|gb|AY223844.1| scaffold111 87.87 767 70 17 1700  
2453 128858 128102 0.0 880  
gi|33285929|gb|AY223844.1| scaffold111 90.47 535 42 3 1739  
2267 615992 616523 0.0 699  
gi|33285929|gb|AY223844.1| scaffold111 84.85 548 64 11 1904  
2440 616523 615984 2e-149 536  
gi|33285929|gb|AY223844.1| scaffold111 98.25 285 5 0 2753  
3037 609505 609789 2e-138 499  
gi|33285929|gb|AY223844.1| scaffold111 98.92 279 2 1 2758  
3035 445069 444791 9e-138 497  
gi|33285929|gb|AY223844.1| scaffold111 98.58 282 3 1 2755  
3035 497400 497119 9e-138 497  
gi|33285929|gb|AY223844.1| scaffold111 96.61 295 9 1 2745  
3038 348531 348825 5e-135 488

gi|33285929|gb|AY223844.1| scaffold111 97.16 282 4 4 2755  
3033 538910 539190 1e-130 473  
gi|33285929|gb|AY223844.1| scaffold111 96.48 284 7 3 2755  
3035 379530 379247 2e-128 466  
gi|33285929|gb|AY223844.1| scaffold111 96.40 278 8 2 2761  
3036 604101 604378 1e-125 457  
gi|33285929|gb|AY223844.1| scaffold111 94.12 289 7 8 2752  
3036 331679 331961 9e-118 431  
gi|33285929|gb|AY223844.1| scaffold111 90.73 302 20 3 1683  
1984 617994 618287 3e-107 396  
gi|33285929|gb|AY223844.1| scaffold111 89.86 276 27 1 2204  
2479 619420 619694 2e-94 353  
gi|33285929|gb|AY223844.1| scaffold111 89.45 275 24 5 1700  
1970 619689 619416 4e-91 342  
gi|33285929|gb|AY223844.1| scaffold111 88.28 273 24 3 2187  
2459 618287 618023 2e-84 320  
gi|33285929|gb|AY223844.1| scaffold111 99.07 108 1 0 2929  
3036 362048 361941 1e-46 195  
gi|33285929|gb|AY223844.1| scaffold111 96.00 100 4 0 2313  
2412 617838 617937 4e-37 163  
gi|33285929|gb|AY223844.1| scaffold111 93.81 97 6 0 1759  
1855 617937 617841 4e-32 147  
gi|33285929|gb|AY223844.1| scaffold111 94.59 74 4 0 3217  
3290 423240 423167 1e-22 115  
gi|33285929|gb|AY223844.1| scaffold13040 92.72 797 56 2 1683  
2478 26558 27353 0.0 1151  
gi|33285929|gb|AY223844.1| scaffold13040 88.43 769 70 14 1700  
2457 27349 26589 0.0 911  
63  
gi|33285929|gb|AY223844.1| scaffold9638 92.72 797 56 2 1681  
2476 5252 4457 0.0 1151  
gi|33285929|gb|AY223844.1| scaffold9638 88.50 774 64 19 1700  
2459 4459 5221 0.0 913  
gi|33285929|gb|AY223844.1| scaffold1411 92.83 795 54 3 1683  
2476 191029 191821 0.0 1151  
gi|33285929|gb|AY223844.1| scaffold1411 87.97 773 69 20 1700  
2459 191819 191058 0.0 891  
gi|33285929|gb|AY223844.1| scaffold1411 97.51 281 4 3 2758  
3035 107352 107072 1e-131 477  
gi|33285929|gb|AY223844.1| scaffold1411 95.24 294 10 4 2755  
3044 23029 22736 3e-127 462  
gi|33285929|gb|AY223844.1| scaffold1411 90.08 262 15 4 2751  
3007 294613 294358 3e-87 329  
gi|33285929|gb|AY223844.1| scaffold1411 100.00 32 0 0  
3174 3205 121019 121050 5e-06 60.2  
gi|33285929|gb|AY223844.1| scaffold495 92.71 796 58 0 1681

2476 172221 171426 0.0 1151  
gi|33285929|gb|AY223844.1| scaffold495 87.91 769 74 14 1700  
2457 171428 172188 0.0 889  
gi|33285929|gb|AY223844.1| scaffold495 98.21 280 3 2 2758  
3035 134527 134248 5e-135 488  
gi|33285929|gb|AY223844.1| scaffold495 97.86 280 5 1 2758  
3036 88649 88370 2e-133 483  
gi|33285929|gb|AY223844.1| scaffold495 96.79 280 8 1 2758  
3036 290343 290622 2e-128 466  
gi|33285929|gb|AY223844.1| scaffold495 95.80 286 8 4 2755  
3036 85358 85073 4e-126 459  
gi|33285929|gb|AY223844.1| scaffold495 88.62 290 29 4 2748  
3034 337659 337947 3e-93 350  
gi|33285929|gb|AY223844.1| scaffold495 89.86 217 21 1 2764  
2979 339664 339448 1e-71 278  
gi|33285929|gb|AY223844.1| scaffold495 94.52 73 4 0 2839  
2911 238070 237998 4e-22 113  
gi|33285929|gb|AY223844.1| scaffold12517 92.53 803 57 3 1683  
2484 37176 37976 0.0 1149  
gi|33285929|gb|AY223844.1| scaffold12517 88.49 773 66 18 1700  
2459 37967 37205 0.0 915  
gi|33285929|gb|AY223844.1| scaffold12517 98.79 165 1 1 2873  
3036 27394 27558 4e-76 292  
gi|33285929|gb|AY223844.1| scaffold12517 95.49 133 4 2 2758  
2889 26080 26211 1e-51 211  
gi|33285929|gb|AY223844.1| scaffold12319 92.61 798 59 0 1683  
2480 17410 18207 0.0 1149  
gi|33285929|gb|AY223844.1| scaffold12319 87.68 771 76 13 1700  
2459 18201 17439 0.0 881  
gi|33285929|gb|AY223844.1| scaffold9484 92.61 798 59 0 1683  
2480 42856 43653 0.0 1149  
gi|33285929|gb|AY223844.1| scaffold9484 87.95 772 72 17 1700  
2459 43647 42885 0.0 891  
gi|33285929|gb|AY223844.1| scaffold6074 93.52 772 48 2 1683  
2453 48212 47442 0.0 1149  
64  
gi|33285929|gb|AY223844.1| scaffold6074 89.49 752 61 13 1717  
2459 47441 48183 0.0 935  
gi|33285929|gb|AY223844.1| scaffold2719\_0 92.71 796 56 2 1683  
2476 51839 52634 0.0 1149  
gi|33285929|gb|AY223844.1| scaffold2719\_0 88.99 772 65 15 1700  
2459 52632 51869 0.0 939  
gi|33285929|gb|AY223844.1| scaffold2719\_0 98.27 289 2 3 2751  
3038 1782 1496 2e-139 503  
gi|33285929|gb|AY223844.1| scaffold2719\_0 84.44 225 30 3 2766  
2985 133321 133097 3e-53 217

gi|33285929|gb|AY223844.1| scaffold2719\_0 88.32 137 12 3 2785  
2921 93266 93398 1e-36 161  
gi|33285929|gb|AY223844.1| scaffold2719\_0 100.00 33 0 0  
3174 3206 59843 59875 1e-06 62.1  
gi|33285929|gb|AY223844.1| scaffold2719\_0 100.00 28 0 0  
3173 3200 60623 60596 8e-04 52.8  
gi|33285929|gb|AY223844.1| scaffold367 92.62 799 57 2 1683  
2480 243164 243961 0.0 1149  
gi|33285929|gb|AY223844.1| scaffold367 88.43 769 74 12 1700  
2459 243955 243193 0.0 915  
gi|33285929|gb|AY223844.1| scaffold367 97.46 276 6 1 2761  
3035 208842 209117 2e-129 470  
gi|33285929|gb|AY223844.1| scaffold367 97.31 260 3 4 2755  
3010 411158 410899 5e-120 438  
gi|33285929|gb|AY223844.1| scaffold367 100.00 102 0 0  
2937 3038 410698 410597 6e-45 189  
gi|33285929|gb|AY223844.1| scaffold18421 92.72 797 52 6 1683  
2476 8724 9517 0.0 1147  
gi|33285929|gb|AY223844.1| scaffold18421 88.76 774 62 19 1700  
2459 9515 8753 0.0 924  
gi|33285929|gb|AY223844.1| scaffold11746 95.18 726 33 2 1757  
2481 7712 8436 0.0 1147  
gi|33285929|gb|AY223844.1| scaffold11746 86.24 712 77 15 1714  
2414 8413 7712 0.0 754  
gi|33285929|gb|AY223844.1| scaffold7546 92.50 800 60 0 1681  
2480 52203 53002 0.0 1147  
gi|33285929|gb|AY223844.1| scaffold7546 88.72 771 68 12 1700  
2459 52996 52234 0.0 926  
gi|33285929|gb|AY223844.1| scaffold7546 97.44 273 7 0 2764  
3036 35966 36238 2e-128 466  
gi|33285929|gb|AY223844.1| scaffold7526 92.70 794 58 0 1683  
2476 44195 43402 0.0 1147  
gi|33285929|gb|AY223844.1| scaffold7526 87.47 774 72 18 1700  
2459 43404 44166 0.0 870  
gi|33285929|gb|AY223844.1| scaffold7526 96.01 301 9 3 2752  
3049 64028 64328 2e-134 486  
gi|33285929|gb|AY223844.1| scaffold7526 96.13 284 8 3 2755  
3035 82482 82765 1e-126 460  
gi|33285929|gb|AY223844.1| scaffold7526 95.24 126 6 0 2751  
2876 86637 86762 3e-48 200  
gi|33285929|gb|AY223844.1| scaffold5818 92.70 794 58 0 1683  
2476 108720 107927 0.0 1147  
65  
gi|33285929|gb|AY223844.1| scaffold5818 88.02 768 70 16 1704  
2459 107934 108691 0.0 889  
gi|33285929|gb|AY223844.1| scaffold5818 96.81 282 7 2 2758

3037 119460 119179 2e-129 470  
gi|33285929|gb|AY223844.1| scaffold5818 81.93 249 30 10 2751  
2993 118852 119091 3e-47 196  
gi|33285929|gb|AY223844.1| scaffold5818 88.61 79 9 0 2860  
2938 31549 31627 4e-17 97.1  
gi|33285929|gb|AY223844.1| scaffold5373 92.51 801 59 1 1681  
2480 15336 16136 0.0 1147  
gi|33285929|gb|AY223844.1| scaffold5373 88.26 758 67 16 1714  
2459 16114 15367 0.0 887  
gi|33285929|gb|AY223844.1| scaffold5373 98.91 274 3 0 2764  
3037 17067 17340 1e-135 490  
gi|33285929|gb|AY223844.1| scaffold5373 97.12 278 6 2 2758  
3033 96365 96088 7e-129 468  
gi|33285929|gb|AY223844.1| scaffold5373 97.11 277 5 3 2758  
3032 110973 111248 9e-128 464  
gi|33285929|gb|AY223844.1| scaffold3867 92.70 795 57 1 1683  
2476 117504 116710 0.0 1147  
gi|33285929|gb|AY223844.1| scaffold3867 89.25 772 62 17 1700  
2459 116712 117474 0.0 948  
gi|33285929|gb|AY223844.1| scaffold3867 95.47 287 10 3 2756  
3041 149703 149987 5e-125 455  
gi|33285929|gb|AY223844.1| scaffold2583 92.70 795 56 2 1683  
2476 138901 139694 0.0 1147  
gi|33285929|gb|AY223844.1| scaffold2583 87.21 774 74 18 1700  
2459 139692 138930 0.0 859  
gi|33285929|gb|AY223844.1| scaffold2583 97.52 121 3 0 2757  
2877 214454 214574 2e-50 207  
gi|33285929|gb|AY223844.1| scaffold2583 87.12 132 15 1 2825  
2956 109937 110066 1e-32 148  
gi|33285929|gb|AY223844.1| scaffold2583 92.31 39 2 1 3174  
3212 152847 152884 2e-04 54.7  
gi|33285929|gb|AY223844.1| scaffold2026 92.70 795 56 2 1683  
2476 231746 232539 0.0 1147  
gi|33285929|gb|AY223844.1| scaffold2026 87.86 774 69 18 1700  
2459 232537 231775 0.0 887  
gi|33285929|gb|AY223844.1| scaffold2026 97.19 285 4 4 2752  
3033 210461 210178 3e-132 479  
gi|33285929|gb|AY223844.1| scaffold2026 97.17 283 7 1 2753  
3035 111692 111411 1e-131 477  
gi|33285929|gb|AY223844.1| scaffold2026 96.42 279 7 3 2758  
3034 108481 108204 1e-125 457  
gi|33285929|gb|AY223844.1| scaffold1955 92.70 795 57 1 1683  
2476 52124 51330 0.0 1147  
gi|33285929|gb|AY223844.1| scaffold1955 88.85 771 67 15 1700  
2459 51332 52094 0.0 931  
gi|33285929|gb|AY223844.1| scaffold1955 90.44 450 38 2 1676

2125 42149 41705 1e-165 590  
gi|33285929|gb|AY223844.1| scaffold1955 99.28 277 2 0 2756  
3032 54318 54042 7e-139 501  
66  
gi|33285929|gb|AY223844.1| scaffold1955 99.27 274 1 1 2764  
3036 211983 211710 1e-136 494  
gi|33285929|gb|AY223844.1| scaffold1955 97.90 286 4 2 2752  
3035 235214 235499 1e-136 494  
gi|33285929|gb|AY223844.1| scaffold1955 98.56 278 4 0 2758  
3035 165087 165364 4e-136 492  
gi|33285929|gb|AY223844.1| scaffold1955 97.17 283 7 1 2760  
3041 185626 185344 1e-131 477  
gi|33285929|gb|AY223844.1| scaffold1955 88.37 344 35 2 2116  
2459 41775 42113 4e-111 409  
gi|33285929|gb|AY223844.1| scaffold1939 92.70 794 58 0 1683  
2476 140182 139389 0.0 1147  
gi|33285929|gb|AY223844.1| scaffold1939 88.02 768 68 18 1704  
2458 139396 140152 0.0 887  
gi|33285929|gb|AY223844.1| scaffold1939 99.29 283 2 0 2753  
3035 143895 144177 3e-142 512  
gi|33285929|gb|AY223844.1| scaffold1939 97.86 281 4 2 2758  
3036 178076 178356 7e-134 484  
gi|33285929|gb|AY223844.1| scaffold1939 98.53 273 4 0 2764  
3036 61875 62147 2e-133 483  
gi|33285929|gb|AY223844.1| scaffold1939 96.49 285 7 3 2754  
3036 243162 243445 7e-129 468  
gi|33285929|gb|AY223844.1| scaffold1939 95.83 288 7 5 2758  
3042 9670 9385 1e-126 460  
gi|33285929|gb|AY223844.1| scaffold1939 95.73 281 9 3 2758  
3036 250638 250359 2e-123 449  
gi|33285929|gb|AY223844.1| scaffold1939 100.00 108 0 0  
2929 3036 25032 24925 3e-48 200  
gi|33285929|gb|AY223844.1| scaffold841 92.53 803 54 6 1684  
2484 122212 123010 0.0 1147  
gi|33285929|gb|AY223844.1| scaffold841 87.55 771 77 14 1700  
2459 123002 122240 0.0 874  
gi|33285929|gb|AY223844.1| scaffold841 99.26 270 2 0 2764  
3033 214006 214275 5e-135 488  
gi|33285929|gb|AY223844.1| scaffold841 96.53 288 7 3 2752  
3036 256113 255826 1e-130 473  
gi|33285929|gb|AY223844.1| scaffold841 95.32 278 9 4 2758  
3032 32817 33093 5e-120 438  
gi|33285929|gb|AY223844.1| scaffold841 98.55 138 2 0 2851  
2988 355261 355398 1e-61 244  
gi|33285929|gb|AY223844.1| scaffold841 81.76 170 7 6 2820  
2989 219992 219847 2e-24 121

gi|33285929|gb|AY223844.1| scaffold841 91.67 60 5 0 2801  
2860 238518 238577 3e-13 84.2  
gi|33285929|gb|AY223844.1| scaffold841 100.00 33 0 0  
3174 3206 129224 129256 1e-06 62.1  
gi|33285929|gb|AY223844.1| scaffold985 92.61 798 57 2 1683  
2479 108908 109704 0.0 1147  
gi|33285929|gb|AY223844.1| scaffold985 93.32 659 44 0 1683  
2341 141188 141846 0.0 976  
gi|33285929|gb|AY223844.1| scaffold985 88.86 772 65 15 1700  
2459 109699 108937 0.0 931  
67  
gi|33285929|gb|AY223844.1| scaffold985 87.77 638 62 11 1830  
2459 141846 141217 0.0 734  
gi|33285929|gb|AY223844.1| scaffold985 98.58 281 4 0 2755  
3035 114130 114410 9e-138 497  
gi|33285929|gb|AY223844.1| scaffold985 96.18 288 9 2 2748  
3034 134776 135062 2e-129 470  
gi|33285929|gb|AY223844.1| scaffold985 98.08 261 2 3 2753  
3010 195234 194974 7e-124 451  
gi|33285929|gb|AY223844.1| scaffold985 86.33 300 3 15 2752  
3035 284161 283884 4e-76 292  
gi|33285929|gb|AY223844.1| scaffold766 92.70 795 56 2 1683  
2476 326425 325632 0.0 1147  
gi|33285929|gb|AY223844.1| scaffold766 88.47 772 68 15 1700  
2459 325634 326396 0.0 915  
gi|33285929|gb|AY223844.1| scaffold766 96.66 299 7 3 2738  
3036 100018 100313 1e-136 494  
gi|33285929|gb|AY223844.1| scaffold766 96.81 282 7 2 2758  
3037 219913 219632 2e-129 470  
gi|33285929|gb|AY223844.1| scaffold766 92.12 330 26 0 1679  
2008 106388 106059 2e-128 466  
gi|33285929|gb|AY223844.1| scaffold766 95.24 294 7 6 2751  
3038 315347 315639 4e-126 459  
gi|33285929|gb|AY223844.1| scaffold766 98.80 249 3 0 2787  
3035 182727 182479 1e-121 444  
gi|33285929|gb|AY223844.1| scaffold766 91.61 298 23 2 2163  
2459 106059 106355 1e-111 411  
gi|33285929|gb|AY223844.1| scaffold766 83.88 242 29 5 2737  
2978 117495 117264 6e-55 222  
gi|33285929|gb|AY223844.1| scaffold766 95.59 136 3 3 2755  
2887 183220 183355 1e-52 215  
gi|33285929|gb|AY223844.1| scaffold766 100.00 33 0 0  
3174 3206 317468 317500 1e-06 62.1  
gi|33285929|gb|AY223844.1| scaffold57 92.70 795 56 2 1683 2476  
163022 163815 0.0 1147  
gi|33285929|gb|AY223844.1| scaffold57 88.30 769 75 12 1700 2459

163813 163051 0.0 909  
gi|33285929|gb|AY223844.1| scaffold57 98.95 285 3 0 2749 3033  
33401 33117 1e-141 510  
gi|33285929|gb|AY223844.1| scaffold57 98.25 286 4 1 2752 3036  
473034 473319 2e-138 499  
gi|33285929|gb|AY223844.1| scaffold57 98.25 286 4 1 2751 3036  
607162 606878 2e-138 499  
gi|33285929|gb|AY223844.1| scaffold57 97.51 281 5 2 2758 3036  
285885 285605 3e-132 479  
gi|33285929|gb|AY223844.1| scaffold57 97.18 284 6 2 2755 3036  
346294 346577 3e-132 479  
gi|33285929|gb|AY223844.1| scaffold57 97.14 280 5 3 2758 3034  
621741 622020 2e-129 470  
gi|33285929|gb|AY223844.1| scaffold57 97.48 159 4 0 2879 3037  
170992 170834 6e-70 272  
gi|33285929|gb|AY223844.1| scaffold57 100.00 122 0 0 2889  
3010 439957 440078 4e-56 226  
68  
gi|33285929|gb|AY223844.1| scaffold57 90.07 151 13 1 2885 3035  
741322 741470 1e-46 195  
gi|33285929|gb|AY223844.1| scaffold57 100.00 92 0 0 2944  
3035 509684 509775 2e-39 171  
gi|33285929|gb|AY223844.1| scaffold57 100.00 79 0 0 2916  
2994 440487 440565 4e-32 147  
gi|33285929|gb|AY223844.1| scaffold57 93.75 96 6 0 1540 1635  
91957 92052 1e-31 145  
gi|33285929|gb|AY223844.1| scaffold57 95.12 82 2 2 2758 2837  
439873 439954 1e-26 128  
gi|33285929|gb|AY223844.1| scaffold57 95.95 74 3 0 2816 2889  
175295 175222 2e-24 121  
gi|33285929|gb|AY223844.1| scaffold35 92.70 794 58 0 1683 2476  
465418 466211 0.0 1147  
gi|33285929|gb|AY223844.1| scaffold35 92.28 790 58 3 1683 2470  
835999 835211 0.0 1120  
gi|33285929|gb|AY223844.1| scaffold35 91.69 794 66 0 1683 2476  
780018 779225 0.0 1103  
gi|33285929|gb|AY223844.1| scaffold35 89.09 770 58 19 1704 2459  
835212 835969 0.0 933  
gi|33285929|gb|AY223844.1| scaffold35 88.72 771 68 13 1700 2459  
466209 465447 0.0 926  
gi|33285929|gb|AY223844.1| scaffold35 87.81 755 76 11 1713 2459  
779243 779989 0.0 872  
gi|33285929|gb|AY223844.1| scaffold35 97.89 285 3 3 2755 3036  
557646 557362 1e-135 490  
gi|33285929|gb|AY223844.1| scaffold35 97.20 286 5 3 2755 3037  
95461 95746 9e-133 481



gi|33285929|gb|AY223844.1| scaffold35 97.18 284 8 0 2754 3037  
504648 504931 9e-133 481  
gi|33285929|gb|AY223844.1| scaffold35 96.88 288 6 3 2755 3039  
727014 726727 3e-132 479  
gi|33285929|gb|AY223844.1| scaffold35 96.84 285 6 3 2755 3036  
405864 406148 1e-130 473  
gi|33285929|gb|AY223844.1| scaffold35 96.18 288 6 5 2752 3034  
708223 708510 2e-128 466  
gi|33285929|gb|AY223844.1| scaffold35 96.77 279 2 2 2755 3033  
180650 180379 4e-126 459  
gi|33285929|gb|AY223844.1| scaffold35 96.72 274 3 3 2764 3037  
681116 681383 7e-124 451  
gi|33285929|gb|AY223844.1| scaffold35 97.20 250 4 3 2754 3001  
818626 818874 2e-114 420  
gi|33285929|gb|AY223844.1| scaffold35 96.71 243 5 3 2755 2994  
478291 478049 7e-109 401  
gi|33285929|gb|AY223844.1| scaffold35 98.97 195 2 0 2843 3037  
749988 750182 3e-93 350  
gi|33285929|gb|AY223844.1| scaffold35 99.32 147 1 0 2751 2897  
395033 395179 3e-68 267  
gi|33285929|gb|AY223844.1| scaffold35 92.57 175 9 4 2752 2922  
777553 777727 9e-63 248  
gi|33285929|gb|AY223844.1| scaffold35 93.27 104 2 5 2752 2850  
748279 748382 1e-32 148  
69  
gi|33285929|gb|AY223844.1| scaffold35 100.00 33 0 0 3174  
3206 353087 353119 1e-06 62.1  
gi|33285929|gb|AY223844.1| scaffold12627 92.59 796 59 0 1683  
2478 22407 23202 0.0 1146  
gi|33285929|gb|AY223844.1| scaffold12627 89.39 773 59 17 1700  
2459 23198 22436 0.0 952  
gi|33285929|gb|AY223844.1| scaffold12627 100.00 38 0 0  
3171 3208 24682 24645 2e-09 71.3  
gi|33285929|gb|AY223844.1| scaffold12009 92.60 797 57 2 1681  
2476 21618 22413 0.0 1146  
gi|33285929|gb|AY223844.1| scaffold12009 87.81 771 71 17 1700  
2457 22411 21651 0.0 881  
gi|33285929|gb|AY223844.1| scaffold12009 98.25 286 3 2 2755  
3038 8183 8468 2e-138 499  
gi|33285929|gb|AY223844.1| scaffold12009 91.88 320 26 0 1683  
2002 1260 1579 9e-123 448  
gi|33285929|gb|AY223844.1| scaffold12009 92.44 291 22 0 2169  
2459 1579 1289 2e-113 416  
gi|33285929|gb|AY223844.1| scaffold12009 91.20 284 25 0 1743  
2026 15727 16010 2e-104 387  
gi|33285929|gb|AY223844.1| scaffold12009 90.49 284 27 0 2145

2428 16010 15727 4e-101 375  
gi|33285929|gb|AY223844.1| scaffold8790 92.59 796 59 0 1681  
2476 54188 53393 0.0 1146  
gi|33285929|gb|AY223844.1| scaffold8790 88.59 771 69 16 1700  
2459 53395 54157 0.0 920  
gi|33285929|gb|AY223844.1| scaffold8790 98.55 276 2 2 2758  
3031 54689 54414 2e-134 486  
gi|33285929|gb|AY223844.1| scaffold8790 96.49 285 8 2 2754  
3036 19842 19558 2e-129 470  
gi|33285929|gb|AY223844.1| scaffold8790 96.44 281 2 3 2758  
3036 2645 2371 1e-125 457  
gi|33285929|gb|AY223844.1| scaffold8790 93.38 151 7 3 2755  
2902 44500 44350 2e-54 220  
gi|33285929|gb|AY223844.1| scaffold7995 92.30 805 62 0 1676  
2480 60281 59477 0.0 1146  
gi|33285929|gb|AY223844.1| scaffold7995 89.00 773 62 17 1700  
2459 59483 60245 0.0 935  
gi|33285929|gb|AY223844.1| scaffold6731 92.49 799 60 0 1683  
2481 18259 19057 0.0 1146  
gi|33285929|gb|AY223844.1| scaffold6731 88.18 770 74 12 1700  
2459 19050 18288 0.0 904  
gi|33285929|gb|AY223844.1| scaffold6731 96.82 283 5 4 2755  
3034 83263 83544 2e-129 470  
gi|33285929|gb|AY223844.1| scaffold4579 92.31 806 62 0 1676  
2481 95597 96402 0.0 1146  
gi|33285929|gb|AY223844.1| scaffold4579 88.49 773 66 18 1700  
2459 96395 95633 0.0 913  
gi|33285929|gb|AY223844.1| scaffold4579 99.27 274 2 0 2764  
3037 2553 2826 3e-137 496  
gi|33285929|gb|AY223844.1| scaffold4579 88.46 104 11 1 2929  
3031 99570 99673 2e-25 124  
70  
gi|33285929|gb|AY223844.1| scaffold4389 92.60 797 58 1 1683  
2478 33080 32284 0.0 1146  
gi|33285929|gb|AY223844.1| scaffold4389 88.50 774 65 18 1700  
2459 32288 33051 0.0 915  
gi|33285929|gb|AY223844.1| scaffold2971 92.59 796 59 0 1681  
2476 136050 136845 0.0 1146  
gi|33285929|gb|AY223844.1| scaffold2971 87.84 773 71 17 1700  
2459 136843 136081 0.0 885  
gi|33285929|gb|AY223844.1| scaffold2971 97.54 285 4 3 2752  
3033 105229 105513 7e-134 484  
gi|33285929|gb|AY223844.1| scaffold1656 92.70 794 57 1 1683  
2476 133618 132826 0.0 1146  
gi|33285929|gb|AY223844.1| scaffold1656 87.92 770 71 17 1700  
2457 132828 133587 0.0 887

gi|33285929|gb|AY223844.1| scaffold1656 98.92 278 3 0 2758  
3035 91780 91503 9e-138 497  
gi|33285929|gb|AY223844.1| scaffold1656 98.20 278 3 2 2758  
3033 201993 201716 7e-134 484  
gi|33285929|gb|AY223844.1| scaffold1656 95.29 191 5 4 2752  
2938 192055 192245 3e-78 300  
gi|33285929|gb|AY223844.1| scaffold9901 92.70 794 56 2 1683  
2476 14402 13611 0.0 1144  
gi|33285929|gb|AY223844.1| scaffold9901 88.62 773 64 18 1700  
2459 13613 14374 0.0 918  
gi|33285929|gb|AY223844.1| scaffold9063 92.50 800 57 2 1681  
2480 5527 4731 0.0 1144  
gi|33285929|gb|AY223844.1| scaffold9063 89.24 762 66 12 1704  
2457 4742 5495 0.0 941  
gi|33285929|gb|AY223844.1| scaffold8482 91.93 818 63 3 1668  
2484 69522 70337 0.0 1144  
gi|33285929|gb|AY223844.1| scaffold8482 88.76 774 64 17 1700  
2460 70327 69564 0.0 926  
gi|33285929|gb|AY223844.1| scaffold8482 96.82 283 8 1 2755  
3036 25145 24863 5e-130 472  
gi|33285929|gb|AY223844.1| scaffold5050 92.48 798 60 0 1683  
2480 3825 3028 0.0 1144  
gi|33285929|gb|AY223844.1| scaffold5050 88.12 766 73 13 1704  
2459 3039 3796 0.0 896  
gi|33285929|gb|AY223844.1| scaffold5050 96.17 287 7 4 2752  
3034 54249 54535 2e-128 466  
gi|33285929|gb|AY223844.1| scaffold5050 96.14 285 5 4 2757  
3039 102963 103243 1e-126 460  
gi|33285929|gb|AY223844.1| scaffold5050 95.22 293 10 4 2748  
3036 106026 106318 1e-126 460  
gi|33285929|gb|AY223844.1| scaffold5050 89.93 149 15 0 2840  
2988 11642 11790 5e-46 193  
gi|33285929|gb|AY223844.1| scaffold2134 92.60 797 56 2 1683  
2476 158410 159206 0.0 1144  
gi|33285929|gb|AY223844.1| scaffold2134 91.58 796 63 3 1683  
2476 57966 57173 0.0 1098  
gi|33285929|gb|AY223844.1| scaffold2134 88.31 770 66 17 1704  
2459 159199 158440 0.0 902  
71  
gi|33285929|gb|AY223844.1| scaffold2134 88.08 755 70 14 1713  
2457 57191 57935 0.0 878  
gi|33285929|gb|AY223844.1| scaffold2134 96.80 281 8 1 2755  
3035 15549 15828 7e-129 468  
gi|33285929|gb|AY223844.1| scaffold2134 96.11 283 9 2 2758  
3038 23190 22908 1e-126 460  
gi|33285929|gb|AY223844.1| scaffold2134 93.57 280 5 6 2758

3036 213096 213363 5e-110 405  
gi|33285929|gb|AY223844.1| scaffold2134 98.20 167 3 0 2756  
2922 45130 45296 4e-76 292  
gi|33285929|gb|AY223844.1| scaffold2134 97.65 170 0 4 2751  
2916 226423 226592 6e-75 289  
gi|33285929|gb|AY223844.1| scaffold2134 93.39 121 6 2 2758  
2876 224485 224365 1e-41 178  
gi|33285929|gb|AY223844.1| scaffold2134 100.00 81 0 0  
2954 3034 226593 226673 3e-33 150  
gi|33285929|gb|AY223844.1| scaffold2134 100.00 79 0 0  
2959 3037 224289 224211 4e-32 147  
gi|33285929|gb|AY223844.1| scaffold1545 92.38 801 61 0 1681  
2481 26644 25844 0.0 1144  
gi|33285929|gb|AY223844.1| scaffold1545 88.42 751 67 14 1717  
2457 25871 26611 0.0 887  
gi|33285929|gb|AY223844.1| scaffold1545 98.56 278 3 1 2764  
3040 277959 278236 1e-135 490  
gi|33285929|gb|AY223844.1| scaffold1545 98.90 272 3 0 2764  
3035 232581 232310 2e-134 486  
gi|33285929|gb|AY223844.1| scaffold1545 87.16 296 26 8 2748  
3034 249422 249130 4e-86 326  
gi|33285929|gb|AY223844.1| scaffold1545 86.08 273 26 5 2764  
3034 246038 246300 3e-73 283  
gi|33285929|gb|AY223844.1| scaffold1545 82.93 82 7 4 2843  
2923 150627 150552 3e-08 67.6  
gi|33285929|gb|AY223844.1| scaffold744 92.10 810 64 0 1675  
2484 13573 14382 0.0 1144  
gi|33285929|gb|AY223844.1| scaffold744 88.07 771 73 13 1700  
2459 14372 13610 0.0 898  
gi|33285929|gb|AY223844.1| scaffold744 97.15 281 7 1 2755  
3034 152142 152422 1e-130 473  
gi|33285929|gb|AY223844.1| scaffold744 96.15 286 11 0 2752  
3037 205444 205729 7e-129 468  
gi|33285929|gb|AY223844.1| scaffold744 98.33 239 2 2 2758  
2994 202098 201860 7e-114 418  
gi|33285929|gb|AY223844.1| scaffold744 96.08 204 5 3 2751  
2952 189505 189303 3e-87 329  
gi|33285929|gb|AY223844.1| scaffold744 83.27 251 33 7 2752  
3001 165000 165242 6e-55 222  
gi|33285929|gb|AY223844.1| scaffold744 83.13 249 32 7 2755  
3001 168677 168437 7e-54 219  
gi|33285929|gb|AY223844.1| scaffold744 84.66 189 19 3 2822  
3000 108098 107910 4e-42 180  
gi|33285929|gb|AY223844.1| scaffold744 97.22 36 1 0 3173  
3208 151773 151738 1e-06 62.1

gi|33285929|gb|AY223844.1| scaffold16070 92.57 794 59 0 1683  
2476 8935 9728 0.0 1142  
gi|33285929|gb|AY223844.1| scaffold16070 88.36 773 67 17 1700  
2459 9726 8964 0.0 907  
gi|33285929|gb|AY223844.1| scaffold13123 92.38 800 61 0 1681  
2480 3071 2272 0.0 1142  
gi|33285929|gb|AY223844.1| scaffold13123 87.56 772 75 15 1700  
2459 2278 3040 0.0 876  
gi|33285929|gb|AY223844.1| scaffold10618 92.58 795 58 1 1683  
2476 42470 43264 0.0 1142  
gi|33285929|gb|AY223844.1| scaffold10618 88.89 774 61 19 1700  
2459 43262 42500 0.0 929  
gi|33285929|gb|AY223844.1| scaffold8277 92.59 796 55 2 1681  
2476 4469 5260 0.0 1142  
gi|33285929|gb|AY223844.1| scaffold8277 87.95 755 71 12 1713  
2459 5242 4500 0.0 874  
gi|33285929|gb|AY223844.1| scaffold8277 94.46 307 10 6 2746  
3049 30957 30655 2e-128 466  
gi|33285929|gb|AY223844.1| scaffold8277 96.45 282 5 5 2755  
3031 26598 26879 1e-126 460  
gi|33285929|gb|AY223844.1| scaffold8277 96.73 214 2 5 2752  
2961 6680 6468 7e-94 351  
gi|33285929|gb|AY223844.1| scaffold8277 100.00 184 0 0  
2853 3036 6469 6286 2e-90 340  
gi|33285929|gb|AY223844.1| scaffold8183 92.57 794 59 0 1683  
2476 53998 53205 0.0 1142  
gi|33285929|gb|AY223844.1| scaffold8183 88.46 771 70 14 1700  
2459 53207 53969 0.0 915  
gi|33285929|gb|AY223844.1| scaffold8183 97.92 288 3 3 2752  
3036 39775 40062 3e-137 496  
gi|33285929|gb|AY223844.1| scaffold8183 95.49 288 13 0 2752  
3039 59536 59249 1e-126 460  
gi|33285929|gb|AY223844.1| scaffold8109 92.30 805 59 3 1678  
2480 53716 52913 0.0 1142  
gi|33285929|gb|AY223844.1| scaffold8109 91.46 796 65 3 1683  
2476 82261 83055 0.0 1092  
gi|33285929|gb|AY223844.1| scaffold8109 88.11 774 67 19 1700  
2459 52919 53681 0.0 896  
gi|33285929|gb|AY223844.1| scaffold8109 87.60 774 71 19 1700  
2459 83053 82291 0.0 874  
gi|33285929|gb|AY223844.1| scaffold8109 96.19 289 7 4 2749  
3036 68622 68337 2e-129 470  
gi|33285929|gb|AY223844.1| scaffold7558 92.58 795 58 1 1683  
2476 16138 16932 0.0 1142  
gi|33285929|gb|AY223844.1| scaffold7558 87.82 772 74 14 1700  
2459 16930 16167 0.0 889

gi|33285929|gb|AY223844.1| scaffold4160 92.57 794 59 0 1683  
2476 74423 73630 0.0 1142  
gi|33285929|gb|AY223844.1| scaffold4160 88.10 773 69 17 1700  
2459 73632 74394 0.0 896  
gi|33285929|gb|AY223844.1| scaffold4160 98.96 288 2 1 2748  
3034 49221 49508 8e-143 514  
73  
gi|33285929|gb|AY223844.1| scaffold4160 94.57 92 5 0 2751  
2842 136544 136635 5e-31 143  
gi|33285929|gb|AY223844.1| scaffold4045 92.58 795 57 2 1683  
2476 126797 126004 0.0 1142  
gi|33285929|gb|AY223844.1| scaffold4045 88.87 773 63 18 1700  
2459 126006 126768 0.0 929  
gi|33285929|gb|AY223844.1| scaffold4045 78.82 288 37 13 2753  
3039 60960 61224 6e-40 172  
gi|33285929|gb|AY223844.1| scaffold1979 92.10 810 62 2 1675  
2483 127332 128140 0.0 1142  
gi|33285929|gb|AY223844.1| scaffold1979 87.97 773 70 17 1700  
2459 128131 127369 0.0 891  
gi|33285929|gb|AY223844.1| scaffold1979 98.23 282 4 1 2755  
3035 238274 238555 4e-136 492  
gi|33285929|gb|AY223844.1| scaffold1979 98.23 282 2 3 2758  
3037 132053 131773 1e-135 490  
gi|33285929|gb|AY223844.1| scaffold1979 97.51 281 5 2 2758  
3036 66402 66682 3e-132 479  
gi|33285929|gb|AY223844.1| scaffold1979 96.48 284 8 2 2755  
3036 181761 181478 7e-129 468  
gi|33285929|gb|AY223844.1| scaffold1979 96.43 280 7 3 2754  
3031 256323 256045 4e-126 459  
gi|33285929|gb|AY223844.1| scaffold1979 97.30 111 3 0 2923  
3033 53378 53268 6e-45 189  
gi|33285929|gb|AY223844.1| scaffold1633 92.38 800 61 0 1680  
2479 151461 152260 0.0 1142  
gi|33285929|gb|AY223844.1| scaffold1633 92.37 799 58 3 1681  
2478 300801 301597 0.0 1136  
gi|33285929|gb|AY223844.1| scaffold1633 88.43 769 64 19 1704  
2459 301588 300832 0.0 904  
gi|33285929|gb|AY223844.1| scaffold1633 87.03 771 81 13 1700  
2459 152255 151493 0.0 854  
gi|33285929|gb|AY223844.1| scaffold1633 99.26 271 2 0 2764  
3034 147451 147181 1e-135 490  
gi|33285929|gb|AY223844.1| scaffold1633 97.56 287 5 2 2756  
3042 286817 286533 1e-135 490  
gi|33285929|gb|AY223844.1| scaffold1633 97.50 280 6 1 2758  
3036 390876 391155 1e-131 477  
gi|33285929|gb|AY223844.1| scaffold1633 96.18 288 7 4 2756

3042 334613 334897 7e-129 468  
gi|33285929|gb|AY223844.1| scaffold1633 95.59 204 7 2 2752  
2953 34936 35139 4e-86 326  
gi|33285929|gb|AY223844.1| scaffold1633 86.03 229 32 0 2774  
3002 391986 392214 3e-62 246  
gi|33285929|gb|AY223844.1| scaffold1633 93.38 151 9 1 2327  
2476 284279 284129 6e-55 222  
gi|33285929|gb|AY223844.1| scaffold1633 92.16 153 12 0 1683  
1835 284524 284372 3e-53 217  
gi|33285929|gb|AY223844.1| scaffold1633 95.16 124 6 0 2336  
2459 284372 284495 3e-47 196  
gi|33285929|gb|AY223844.1| scaffold1633 90.60 149 10 4 1700  
1844 284131 284279 1e-46 195  
74  
gi|33285929|gb|AY223844.1| scaffold1633 88.00 75 9 0 2838  
2912 260517 260443 6e-15 89.8  
gi|33285929|gb|AY223844.1| scaffold1633 100.00 35 0 0  
3174 3208 190873 190907 1e-07 65.8  
gi|33285929|gb|AY223844.1| scaffold1109 92.58 795 58 1 1683  
2476 144480 143686 0.0 1142  
gi|33285929|gb|AY223844.1| scaffold1109 88.05 770 69 17 1700  
2456 143688 144447 0.0 891  
gi|33285929|gb|AY223844.1| scaffold1109 98.62 290 4 0 2749  
3038 53921 54210 8e-143 514  
gi|33285929|gb|AY223844.1| scaffold1109 96.43 308 7 4 2755  
3059 354004 353698 5e-140 505  
gi|33285929|gb|AY223844.1| scaffold1109 97.89 285 6 0 2751  
3035 229653 229937 1e-136 494  
gi|33285929|gb|AY223844.1| scaffold1109 98.55 275 4 0 2764  
3038 256816 256542 2e-134 486  
gi|33285929|gb|AY223844.1| scaffold1109 97.21 287 6 2 2752  
3036 526213 526499 7e-134 484  
gi|33285929|gb|AY223844.1| scaffold1109 97.15 281 5 3 2758  
3036 71364 71643 5e-130 472  
gi|33285929|gb|AY223844.1| scaffold1109 96.13 284 8 3 2755  
3035 539748 540031 1e-126 460  
gi|33285929|gb|AY223844.1| scaffold1109 94.39 285 13 3 2755  
3036 274482 274198 7e-119 435  
gi|33285929|gb|AY223844.1| scaffold1109 84.23 241 37 1 2760  
3000 440705 440944 3e-58 233  
gi|33285929|gb|AY223844.1| scaffold1109 93.68 95 3 3 2755  
2846 304895 304801 6e-30 139  
gi|33285929|gb|AY223844.1| scaffold1109 100.00 35 0 0  
3174 3208 275699 275733 1e-07 65.8  
gi|33285929|gb|AY223844.1| scaffold1072 92.48 798 59 1 1683  
2479 188337 189134 0.0 1142

gi|33285929|gb|AY223844.1| scaffold1072 89.05 776 62 17 1697  
2459 189132 188367 0.0 941  
gi|33285929|gb|AY223844.1| scaffold1072 97.83 277 4 2 2761  
3036 56461 56736 1e-131 477  
gi|33285929|gb|AY223844.1| scaffold899 92.57 794 59 0 1683  
2476 267338 268131 0.0 1142  
gi|33285929|gb|AY223844.1| scaffold899 88.23 773 68 17 1700  
2459 268129 267367 0.0 902  
gi|33285929|gb|AY223844.1| scaffold899 98.21 279 5 0 2752  
3030 247531 247809 5e-135 488  
gi|33285929|gb|AY223844.1| scaffold899 95.79 285 8 4 2754  
3036 55489 55207 1e-125 457  
gi|33285929|gb|AY223844.1| scaffold899 98.40 250 3 1 2760  
3009 125725 125973 5e-120 438  
gi|33285929|gb|AY223844.1| scaffold597 92.57 794 59 0 1683  
2476 157758 158551 0.0 1142  
gi|33285929|gb|AY223844.1| scaffold597 87.32 773 75 18 1700  
2459 158549 157787 0.0 863  
gi|33285929|gb|AY223844.1| scaffold597 91.36 382 30 3 2073  
2454 392072 392450 2e-144 520  
75  
gi|33285929|gb|AY223844.1| scaffold597 98.95 286 2 1 2751  
3035 90835 91120 1e-141 510  
gi|33285929|gb|AY223844.1| scaffold597 98.25 286 2 3 2754  
3036 132880 132595 9e-138 497  
gi|33285929|gb|AY223844.1| scaffold597 96.07 280 11 0 2767  
3046 116866 117145 1e-125 457  
gi|33285929|gb|AY223844.1| scaffold597 89.64 338 33 2 1718  
2055 392449 392114 3e-117 429  
gi|33285929|gb|AY223844.1| scaffold597 97.53 243 6 0 2790  
3032 82157 82399 2e-113 416  
gi|33285929|gb|AY223844.1| scaffold597 99.46 184 1 0 2853  
3036 30284 30467 7e-89 335  
gi|33285929|gb|AY223844.1| scaffold597 78.99 238 33 4 2751  
2988 176368 176148 4e-32 147  
gi|33285929|gb|AY223844.1| scaffold597 88.10 84 9 1 2779  
2861 2438 2521 1e-17 99.0  
gi|33285929|gb|AY223844.1| scaffold597 100.00 34 0 0  
3174 3207 295307 295274 4e-07 63.9  
gi|33285929|gb|AY223844.1| scaffold597 100.00 33 0 0  
3174 3206 283433 283465 1e-06 62.1  
gi|33285929|gb|AY223844.1| scaffold583 92.58 795 58 1 1683  
2476 300752 301546 0.0 1142  
gi|33285929|gb|AY223844.1| scaffold583 88.95 760 63 16 1704  
2451 301539 300789 0.0 918  
gi|33285929|gb|AY223844.1| scaffold583 96.53 288 7 3 2751



3036 119338 119624 1e-130 473  
gi|33285929|gb|AY223844.1| scaffold583 98.01 251 5 0 2785  
3035 229792 230042 2e-119 436  
gi|33285929|gb|AY223844.1| scaffold583 97.18 248 7 0 2791  
3038 32435 32682 2e-114 420  
gi|33285929|gb|AY223844.1| scaffold583 92.00 75 5 1 2797  
2871 183512 183585 2e-19 104  
gi|33285929|gb|AY223844.1| scaffold559 92.59 796 55 4 1683  
2476 178135 177342 0.0 1142  
gi|33285929|gb|AY223844.1| scaffold559 88.49 773 66 18 1700  
2459 177344 178106 0.0 915  
gi|33285929|gb|AY223844.1| scaffold559 91.71 362 30 0 1746  
2107 311824 312185 5e-140 505  
gi|33285929|gb|AY223844.1| scaffold559 98.49 265 4 0 2764  
3028 334930 335194 7e-129 468  
gi|33285929|gb|AY223844.1| scaffold559 97.25 255 5 2 2758  
3010 407218 406964 9e-118 431  
gi|33285929|gb|AY223844.1| scaffold559 90.71 312 27 2 2115  
2425 312134 311824 9e-113 414  
gi|33285929|gb|AY223844.1| scaffold559 93.42 76 5 0 2833  
2908 276119 276194 4e-22 113  
gi|33285929|gb|AY223844.1| scaffold511 93.19 778 50 3 1683  
2459 169269 170044 0.0 1142  
gi|33285929|gb|AY223844.1| scaffold511 89.23 789 60 19 1683  
2459 170073 169298 0.0 963  
gi|33285929|gb|AY223844.1| scaffold511 97.89 284 6 0 2754  
3037 339387 339670 4e-136 492  
76  
gi|33285929|gb|AY223844.1| scaffold511 97.54 284 6 1 2758  
3040 260432 260715 7e-134 484  
gi|33285929|gb|AY223844.1| scaffold511 98.53 273 4 0 2764  
3036 51095 51367 2e-133 483  
gi|33285929|gb|AY223844.1| scaffold511 98.50 267 3 1 2775  
3041 222439 222704 2e-129 470  
gi|33285929|gb|AY223844.1| scaffold511 96.45 282 7 3 2758  
3036 4201 4482 3e-127 462  
gi|33285929|gb|AY223844.1| scaffold511 93.93 280 6 3 2764  
3032 211180 211459 3e-112 412  
gi|33285929|gb|AY223844.1| scaffold341 92.57 794 59 0 1683  
2476 388345 387552 0.0 1142  
gi|33285929|gb|AY223844.1| scaffold341 88.13 758 70 14 1712  
2459 387569 388316 0.0 883  
gi|33285929|gb|AY223844.1| scaffold341 98.61 288 1 3 2752  
3036 436713 437000 1e-140 507  
gi|33285929|gb|AY223844.1| scaffold341 98.59 284 4 0 2751  
3034 217204 216921 2e-139 503

gi|33285929|gb|AY223844.1| scaffold341 98.91 274 3 0 2764  
3037 319773 320046 1e-135 490  
gi|33285929|gb|AY223844.1| scaffold341 98.21 280 3 2 2758  
3035 385767 385488 5e-135 488  
gi|33285929|gb|AY223844.1| scaffold341 97.49 279 5 2 2758  
3034 8220 7942 4e-131 475  
gi|33285929|gb|AY223844.1| scaffold341 96.54 289 7 3 2752  
3037 196311 196023 4e-131 475  
gi|33285929|gb|AY223844.1| scaffold341 97.75 267 4 2 2758  
3022 48920 49186 4e-126 459  
gi|33285929|gb|AY223844.1| scaffold341 93.93 280 0 9 2758  
3035 361249 360985 1e-110 407  
gi|33285929|gb|AY223844.1| scaffold341 97.10 207 5 1 2827  
3033 391814 392019 9e-93 348  
gi|33285929|gb|AY223844.1| scaffold341 98.95 95 1 0 2942  
3036 195950 195856 2e-39 171  
gi|33285929|gb|AY223844.1| scaffold341 100.00 48 0 0  
2764 2811 391769 391816 6e-15 89.8  
gi|33285929|gb|AY223844.1| scaffold341 95.00 40 2 0 3167  
3206 17037 17076 4e-07 63.9  
gi|33285929|gb|AY223844.1| scaffold341 100.00 33 0 0  
3174 3206 41956 41924 1e-06 62.1  
gi|33285929|gb|AY223844.1| scaffold268 92.57 794 59 0 1683  
2476 416987 417780 0.0 1142  
gi|33285929|gb|AY223844.1| scaffold268 88.60 772 67 15 1700  
2459 417778 417016 0.0 920  
gi|33285929|gb|AY223844.1| scaffold268 97.90 286 4 2 2752  
3036 355920 356204 1e-136 494  
gi|33285929|gb|AY223844.1| scaffold268 98.53 273 4 0 2764  
3036 7888 8160 2e-133 483  
gi|33285929|gb|AY223844.1| scaffold268 98.05 257 5 0 2778  
3034 477739 477483 9e-123 448  
gi|33285929|gb|AY223844.1| scaffold268 97.83 230 4 1 2811  
3040 302591 302819 3e-107 396  
77  
gi|33285929|gb|AY223844.1| scaffold268 97.01 234 7 0 2803  
3036 427981 428214 1e-106 394  
gi|33285929|gb|AY223844.1| scaffold268 91.62 179 4 5 2750  
2927 180366 180198 2e-59 237  
gi|33285929|gb|AY223844.1| scaffold268 100.00 49 0 0  
2764 2812 302135 302183 2e-15 91.6  
gi|33285929|gb|AY223844.1| scaffold268 100.00 35 0 0  
3174 3208 461204 461170 1e-07 65.8  
gi|33285929|gb|AY223844.1| scaffold179 92.21 809 58 4 1675  
2481 355092 355897 0.0 1142  
gi|33285929|gb|AY223844.1| scaffold179 88.87 755 67 10 1713

2459 355874 355129 0.0 915  
gi|33285929|gb|AY223844.1| scaffold179 97.55 286 3 4 2755  
3036 74626 74911 2e-134 486  
gi|33285929|gb|AY223844.1| scaffold179 91.19 227 18 2 1683  
1908 486525 486300 2e-80 307  
gi|33285929|gb|AY223844.1| scaffold179 92.61 203 15 0 2258  
2460 486295 486497 4e-76 292  
gi|33285929|gb|AY223844.1| scaffold179 87.70 244 30 0 2797  
3040 218960 219203 7e-74 285  
gi|33285929|gb|AY223844.1| scaffold179 92.68 123 8 1 2755  
2876 351109 351231 5e-41 176  
gi|33285929|gb|AY223844.1| scaffold179 87.22 133 16 1 2883  
3015 363405 363274 3e-33 150  
gi|33285929|gb|AY223844.1| scaffold179 93.24 74 2 3 2839  
2909 221137 221064 6e-20 106  
gi|33285929|gb|AY223844.1| scaffold59 92.10 810 62 2 1674 2481  
341477 340668 0.0 1142  
gi|33285929|gb|AY223844.1| scaffold59 92.07 794 63 0 1683 2476  
490359 491152 0.0 1120  
gi|33285929|gb|AY223844.1| scaffold59 88.73 754 68 13 1713 2457  
340691 341436 0.0 907  
gi|33285929|gb|AY223844.1| scaffold59 87.55 771 77 14 1700 2459  
491150 490388 0.0 876  
gi|33285929|gb|AY223844.1| scaffold59 98.95 287 3 0 2751 3037  
429165 428879 8e-143 514  
gi|33285929|gb|AY223844.1| scaffold59 97.23 289 4 4 2752 3036  
268521 268809 2e-134 486  
gi|33285929|gb|AY223844.1| scaffold59 97.12 278 7 1 2760 3036  
427758 428035 7e-129 468  
gi|33285929|gb|AY223844.1| scaffold59 95.52 290 3 6 2755 3037  
198235 198521 5e-125 455  
gi|33285929|gb|AY223844.1| scaffold59 95.44 285 10 2 2755 3036  
433767 433483 7e-124 451  
gi|33285929|gb|AY223844.1| scaffold59 88.73 204 17 5 2277 2475  
299959 300161 1e-61 244  
gi|33285929|gb|AY223844.1| scaffold59 83.94 218 33 2 2760 2975  
695715 695498 2e-50 207  
gi|33285929|gb|AY223844.1| scaffold59 91.55 142 12 0 1687 1828  
458798 458939 3e-47 196  
gi|33285929|gb|AY223844.1| scaffold59 93.16 117 8 0 2343 2459  
458939 458823 6e-40 172  
78  
gi|33285929|gb|AY223844.1| scaffold59 95.12 82 4 0 3209 3290  
570505 570424 4e-27 130  
gi|33285929|gb|AY223844.1| scaffold59 100.00 33 0 0 3174  
3206 337119 337087 1e-06 62.1

gi|33285929|gb|AY223844.1| scaffold59 100.00 33 0 0 3174  
3206 630999 631031 1e-06 62.1  
gi|33285929|gb|AY223844.1| scaffold59 100.00 31 0 0 1685  
1715 289352 289382 2e-05 58.4  
gi|33285929|gb|AY223844.1| scaffold59 100.00 28 0 0 3173  
3200 631791 631764 8e-04 52.8  
gi|33285929|gb|AY223844.1| scaffold13030 92.69 793 53 2 1683  
2475 12858 12071 0.0 1140  
gi|33285929|gb|AY223844.1| scaffold13030 89.11 771 60 20 1700  
2459 12072 12829 0.0 937  
gi|33285929|gb|AY223844.1| scaffold3874 92.46 796 60 0 1683  
2478 119534 120329 0.0 1140  
gi|33285929|gb|AY223844.1| scaffold3874 88.34 772 69 15 1700  
2459 120325 119563 0.0 909  
gi|33285929|gb|AY223844.1| scaffold3874 95.36 280 11 2 2758  
3035 81618 81897 1e-121 444  
gi|33285929|gb|AY223844.1| scaffold2421 92.47 797 58 2 1681  
2476 74988 75783 0.0 1140  
gi|33285929|gb|AY223844.1| scaffold2421 87.95 772 72 16 1700  
2459 75781 75019 0.0 893  
gi|33285929|gb|AY223844.1| scaffold2421 98.57 280 3 1 2758  
3036 89233 89512 1e-136 494  
gi|33285929|gb|AY223844.1| scaffold1378 92.37 799 61 0 1681  
2479 87403 88201 0.0 1140  
gi|33285929|gb|AY223844.1| scaffold1378 87.68 771 76 15 1700  
2459 88196 87434 0.0 880  
gi|33285929|gb|AY223844.1| scaffold1378 96.01 451 18 0 1681  
2131 79342 79792 0.0 736  
gi|33285929|gb|AY223844.1| scaffold1378 96.80 281 7 2 2758  
3036 182684 182964 7e-129 468  
gi|33285929|gb|AY223844.1| scaffold1378 90.96 343 30 1 2116  
2458 79716 79375 1e-126 460  
gi|33285929|gb|AY223844.1| scaffold1378 97.58 248 4 2 2760  
3006 205336 205582 1e-115 424  
gi|33285929|gb|AY223844.1| scaffold1378 98.43 191 3 0 2830  
3020 216086 216276 2e-89 337  
gi|33285929|gb|AY223844.1| scaffold1378 97.42 194 5 0 2764  
2957 158923 159116 9e-88 331  
gi|33285929|gb|AY223844.1| scaffold1378 95.48 199 5 4 2755  
2949 3448 3646 9e-83 315  
gi|33285929|gb|AY223844.1| scaffold1378 85.27 224 16 9 2751  
2961 8520 8301 1e-52 215  
gi|33285929|gb|AY223844.1| scaffold1378 95.18 83 4 0 3208  
3290 44612 44530 1e-27 132  
gi|33285929|gb|AY223844.1| scaffold1378 100.00 52 0 0  
2985 3036 159240 159291 4e-17 97.1

gi|33285929|gb|AY223844.1| scaffold1378 100.00 47 0 0  
2764 2810 1176 1130 2e-14 87.9  
79  
gi|33285929|gb|AY223844.1| scaffold1378 97.87 47 0 1 2991  
3037 1135 1090 4e-12 80.5  
gi|33285929|gb|AY223844.1| scaffold900 92.49 799 55 5 1681  
2476 268861 269657 0.0 1140  
gi|33285929|gb|AY223844.1| scaffold900 89.39 792 63 12 1688  
2471 338492 339270 0.0 979  
gi|33285929|gb|AY223844.1| scaffold900 87.86 774 70 20 1700  
2459 269655 268892 0.0 887  
gi|33285929|gb|AY223844.1| scaffold900 85.84 770 84 15 1701  
2459 339272 338517 0.0 797  
gi|33285929|gb|AY223844.1| scaffold900 98.21 279 4 1 2764  
3042 40831 41108 2e-134 486  
gi|33285929|gb|AY223844.1| scaffold900 98.18 274 5 0 2764  
3037 179151 178878 3e-132 479  
gi|33285929|gb|AY223844.1| scaffold900 97.47 277 6 1 2758  
3034 87498 87223 5e-130 472  
gi|33285929|gb|AY223844.1| scaffold900 100.00 89 0 0  
2948 3036 101025 100937 1e-37 165  
gi|33285929|gb|AY223844.1| scaffold900 95.24 42 1 1 3167  
3208 93813 93773 1e-07 65.8  
gi|33285929|gb|AY223844.1| scaffold304 92.77 788 56 1 1689  
2476 422966 423752 0.0 1140  
gi|33285929|gb|AY223844.1| scaffold304 88.23 773 67 18 1700  
2459 423750 422989 0.0 902  
gi|33285929|gb|AY223844.1| scaffold304 96.89 289 6 3 2746  
3034 412936 412651 9e-133 481  
gi|33285929|gb|AY223844.1| scaffold304 97.83 277 5 1 2761  
3036 223925 223649 1e-131 477  
gi|33285929|gb|AY223844.1| scaffold304 96.89 257 7 1 2755  
3010 150018 149762 3e-117 429  
gi|33285929|gb|AY223844.1| scaffold304 87.50 224 23 3 2752  
2970 93534 93757 2e-64 254  
gi|33285929|gb|AY223844.1| scaffold159 92.46 796 60 0 1681  
2476 122869 122074 0.0 1140  
gi|33285929|gb|AY223844.1| scaffold159 87.69 772 74 15 1700  
2459 122076 122838 0.0 880  
gi|33285929|gb|AY223844.1| scaffold159 98.58 281 2 2 2758  
3036 192859 192579 3e-137 496  
gi|33285929|gb|AY223844.1| scaffold159 97.20 286 6 2 2755  
3038 172358 172073 2e-133 483  
gi|33285929|gb|AY223844.1| scaffold159 98.19 277 4 1 2761  
3036 436793 436517 2e-133 483  
gi|33285929|gb|AY223844.1| scaffold159 95.42 306 8 6 2738

3038 538291 538595 2e-133 483  
gi|33285929|gb|AY223844.1| scaffold159 92.31 325 25 0 2042  
2366 222052 222376 9e-128 464  
gi|33285929|gb|AY223844.1| scaffold159 96.72 274 7 2 2758  
3029 431836 431563 5e-125 455  
gi|33285929|gb|AY223844.1| scaffold159 98.82 255 2 1 2756  
3010 463709 463456 2e-124 453  
gi|33285929|gb|AY223844.1| scaffold159 96.09 256 9 1 2782  
3036 176103 176358 2e-113 416  
80  
gi|33285929|gb|AY223844.1| scaffold159 90.84 251 23 0 1805  
2055 222376 222126 2e-89 337  
gi|33285929|gb|AY223844.1| scaffold159 93.96 149 9 0 1686  
1834 221904 222052 4e-56 226  
gi|33285929|gb|AY223844.1| scaffold159 95.12 123 6 0 2337  
2459 222052 221930 1e-46 195  
gi|33285929|gb|AY223844.1| scaffold159 92.96 71 4 1 2755  
2824 549988 549918 8e-19 102  
gi|33285929|gb|AY223844.1| scaffold159 100.00 48 0 0  
2988 3035 143975 143928 6e-15 89.8  
gi|33285929|gb|AY223844.1| scaffold159 100.00 30 0 0  
3175 3204 161719 161690 6e-05 56.5  
gi|33285929|gb|AY223844.1| scaffold50 92.46 796 60 0 1683 2478  
733209 734004 0.0 1140  
gi|33285929|gb|AY223844.1| scaffold50 91.56 794 67 0 1683 2476  
684865 684072 0.0 1098  
gi|33285929|gb|AY223844.1| scaffold50 88.33 771 71 14 1700 2459  
734000 733238 0.0 909  
gi|33285929|gb|AY223844.1| scaffold50 87.71 773 72 19 1700 2459  
684074 684836 0.0 880  
gi|33285929|gb|AY223844.1| scaffold50 92.95 383 25 2 1676 2057  
52916 53297 1e-155 556  
gi|33285929|gb|AY223844.1| scaffold50 90.49 410 39 0 2071 2480  
740480 740889 4e-151 542  
gi|33285929|gb|AY223844.1| scaffold50 97.92 289 2 4 2752 3037  
535669 535956 9e-138 497  
gi|33285929|gb|AY223844.1| scaffold50 98.22 281 3 2 2758 3036  
623538 623258 1e-135 490  
gi|33285929|gb|AY223844.1| scaffold50 98.21 279 5 0 2756 3034  
276219 276497 5e-135 488  
gi|33285929|gb|AY223844.1| scaffold50 96.89 289 5 4 2752 3037  
33304 33017 9e-133 481  
gi|33285929|gb|AY223844.1| scaffold50 97.50 280 7 0 2757 3036  
579453 579174 3e-132 479  
gi|33285929|gb|AY223844.1| scaffold50 97.50 280 5 2 2758 3036  
511971 512249 1e-131 477

gi|33285929|gb|AY223844.1| scaffold50 91.55 343 26 3 2116 2457  
53295 52955 2e-129 470  
gi|33285929|gb|AY223844.1| scaffold50 89.97 359 33 3 1700 2055  
740883 740525 1e-126 460  
gi|33285929|gb|AY223844.1| scaffold50 88.99 318 35 0 2167 2484  
54045 54362 1e-106 394  
gi|33285929|gb|AY223844.1| scaffold50 88.64 308 32 3 1700 2004  
54352 54045 5e-100 372  
gi|33285929|gb|AY223844.1| scaffold50 91.82 220 17 1 1681 1900  
739020 739238 6e-80 305  
gi|33285929|gb|AY223844.1| scaffold50 92.06 189 15 0 2271 2459  
739238 739050 3e-68 267  
gi|33285929|gb|AY223844.1| scaffold50 89.58 96 10 0 2936 3031  
609132 609037 6e-25 122  
gi|33285929|gb|AY223844.1| scaffold50 100.00 34 0 0 3174  
3207 306477 306510 4e-07 63.9  
81  
gi|33285929|gb|AY223844.1| scaffold6496 92.45 795 60 0 1685  
2479 99633 98839 0.0 1138  
gi|33285929|gb|AY223844.1| scaffold6496 90.55 794 75 0 1683  
2476 87042 87835 0.0 1053  
gi|33285929|gb|AY223844.1| scaffold6496 89.01 755 67 10 1713  
2459 98860 99606 0.0 922  
gi|33285929|gb|AY223844.1| scaffold6496 87.27 770 77 16 1700  
2457 87833 87073 0.0 859  
gi|33285929|gb|AY223844.1| scaffold6496 97.86 281 4 2 2758  
3036 27132 26852 7e-134 484  
gi|33285929|gb|AY223844.1| scaffold6496 96.70 273 5 4 2752  
3020 82540 82268 7e-124 451  
gi|33285929|gb|AY223844.1| scaffold2269 92.37 799 59 2 1683  
2480 150268 149471 0.0 1138  
gi|33285929|gb|AY223844.1| scaffold2269 87.98 774 68 19 1700  
2459 149477 150239 0.0 891  
gi|33285929|gb|AY223844.1| scaffold2269 98.57 280 3 1 2758  
3036 206626 206905 1e-136 494  
gi|33285929|gb|AY223844.1| scaffold2269 94.60 278 13 2 2758  
3033 104693 104970 3e-117 429  
gi|33285929|gb|AY223844.1| scaffold2269 100.00 46 0 0  
2972 3017 131573 131528 8e-14 86.1  
gi|33285929|gb|AY223844.1| scaffold2269 100.00 28 0 0  
3173 3200 212477 212450 8e-04 52.8  
gi|33285929|gb|AY223844.1| scaffold2111 92.65 789 58 0 1682  
2470 18693 17905 0.0 1138  
gi|33285929|gb|AY223844.1| scaffold2111 87.57 764 69 20 1704  
2453 17906 18657 0.0 861  
gi|33285929|gb|AY223844.1| scaffold2111 88.93 551 38 11 1700

2247 161107 160577 0.0 660  
gi|33285929|gb|AY223844.1| scaffold2111 87.88 553 47 9 1927  
2479 160580 161112 6e-179 634  
gi|33285929|gb|AY223844.1| scaffold2111 97.92 288 6 0 2753  
3040 3286 2999 2e-138 499  
gi|33285929|gb|AY223844.1| scaffold2111 98.92 279 2 1 2758  
3036 124433 124156 9e-138 497  
gi|33285929|gb|AY223844.1| scaffold2111 99.27 273 2 0 2764  
3036 77392 77664 1e-136 494  
gi|33285929|gb|AY223844.1| scaffold2111 97.53 283 4 3 2755  
3034 134773 134491 9e-133 481  
gi|33285929|gb|AY223844.1| scaffold2111 96.03 252 8 2 2761  
3010 159138 159389 4e-111 409  
gi|33285929|gb|AY223844.1| scaffold2111 95.90 122 5 0 2764  
2885 159660 159539 1e-47 198  
gi|33285929|gb|AY223844.1| scaffold1827 92.49 799 53 6 1681  
2476 186925 187719 0.0 1138  
gi|33285929|gb|AY223844.1| scaffold1827 89.40 755 63 12 1713  
2458 187701 186955 0.0 937  
gi|33285929|gb|AY223844.1| scaffold1827 98.53 273 4 0 2764  
3036 224313 224041 2e-133 483  
gi|33285929|gb|AY223844.1| scaffold1827 96.50 286 7 3 2755  
3037 65076 65361 2e-129 470  
82  
gi|33285929|gb|AY223844.1| scaffold1701 92.38 800 58 2 1683  
2480 23983 23185 0.0 1138  
gi|33285929|gb|AY223844.1| scaffold1701 87.81 763 67 20 1711  
2459 23204 23954 0.0 870  
gi|33285929|gb|AY223844.1| scaffold1701 98.24 284 5 0 2751  
3034 198127 197844 9e-138 497  
gi|33285929|gb|AY223844.1| scaffold1701 95.19 291 4 5 2758  
3046 6419 6137 7e-124 451  
gi|33285929|gb|AY223844.1| scaffold1701 99.49 196 1 0 2841  
3036 39358 39553 2e-95 357  
gi|33285929|gb|AY223844.1| scaffold1701 96.07 178 7 0 2857  
3034 44208 44385 2e-75 291  
gi|33285929|gb|AY223844.1| scaffold1701 87.50 168 4 5 2791  
2958 92785 92635 1e-41 178  
gi|33285929|gb|AY223844.1| scaffold1701 100.00 91 0 0  
2945 3035 227875 227965 8e-39 169  
gi|33285929|gb|AY223844.1| scaffold1701 100.00 81 0 0  
2950 3030 116495 116575 3e-33 150  
gi|33285929|gb|AY223844.1| scaffold1701 100.00 48 0 0  
2764 2811 227728 227775 6e-15 89.8  
gi|33285929|gb|AY223844.1| scaffold333 92.65 789 58 0 1683  
2471 101789 102577 0.0 1138



gi|33285929|gb|AY223844.1| scaffold333 89.12 772 61 16 1701  
2459 102579 101818 0.0 941  
gi|33285929|gb|AY223844.1| scaffold333 97.90 286 3 3 2750  
3034 94022 93739 4e-136 492  
gi|33285929|gb|AY223844.1| scaffold333 97.26 292 4 4 2749  
3036 206914 207205 4e-136 492  
gi|33285929|gb|AY223844.1| scaffold333 98.21 279 4 1 2758  
3035 115367 115089 2e-134 486  
gi|33285929|gb|AY223844.1| scaffold333 97.23 289 4 4 2752  
3036 269684 269972 2e-134 486  
gi|33285929|gb|AY223844.1| scaffold333 97.86 280 4 2 2758  
3035 59088 58809 2e-133 483  
gi|33285929|gb|AY223844.1| scaffold333 97.60 250 5 1 2764  
3012 194191 193942 1e-116 427  
gi|33285929|gb|AY223844.1| scaffold333 92.93 283 9 4 2758  
3038 36204 35931 7e-109 401  
gi|33285929|gb|AY223844.1| scaffold333 93.10 174 10 2 2751  
2923 77014 77186 2e-64 254  
gi|33285929|gb|AY223844.1| scaffold333 92.05 151 12 0 2761  
2911 282285 282435 3e-52 213  
gi|33285929|gb|AY223844.1| scaffold333 96.70 91 2 1 2758  
2848 261711 261622 3e-33 150  
gi|33285929|gb|AY223844.1| scaffold333 88.03 117 14 0 2823  
2939 347600 347484 6e-30 139  
gi|33285929|gb|AY223844.1| scaffold169 92.37 799 59 1 1681  
2479 355366 354570 0.0 1138  
gi|33285929|gb|AY223844.1| scaffold169 88.99 754 66 12 1714  
2459 354591 355335 0.0 918  
gi|33285929|gb|AY223844.1| scaffold169 89.02 747 63 6 1713  
2459 235929 235202 0.0 909  
83  
gi|33285929|gb|AY223844.1| scaffold169 86.94 804 66 19 1683  
2476 235173 235947 0.0 867  
gi|33285929|gb|AY223844.1| scaffold169 97.87 282 4 2 2758  
3037 489237 488956 2e-134 486  
gi|33285929|gb|AY223844.1| scaffold169 97.17 283 6 2 2755  
3036 137561 137842 1e-131 477  
gi|33285929|gb|AY223844.1| scaffold169 98.87 265 3 0 2751  
3015 366752 366488 1e-130 473  
gi|33285929|gb|AY223844.1| scaffold169 96.54 289 3 7 2755  
3036 543233 542945 5e-130 472  
gi|33285929|gb|AY223844.1| scaffold169 96.39 277 6 3 2758  
3032 160366 160640 2e-124 453  
gi|33285929|gb|AY223844.1| scaffold169 88.21 246 22 2 2758  
3003 478118 478356 2e-74 287  
gi|33285929|gb|AY223844.1| scaffold169 99.34 151 1 0 2886

3036 298529 298679 2e-70 274  
gi|33285929|gb|AY223844.1| scaffold169 96.89 161 4 1 2879  
3039 510768 510609 7e-69 268  
gi|33285929|gb|AY223844.1| scaffold169 93.38 151 9 1 2326  
2476 353590 353739 6e-55 222  
gi|33285929|gb|AY223844.1| scaffold169 91.39 151 13 0 2761  
2911 277451 277301 2e-50 207  
gi|33285929|gb|AY223844.1| scaffold169 94.78 134 5 2 1714  
1846 353721 353589 2e-50 207  
gi|33285929|gb|AY223844.1| scaffold169 95.38 130 5 1 2761  
2889 516057 515928 6e-50 206  
gi|33285929|gb|AY223844.1| scaffold169 82.51 223 20 9 2769  
2989 127149 126944 1e-41 178  
gi|33285929|gb|AY223844.1| scaffold104 92.07 807 64 0 1677  
2483 639530 638724 0.0 1138  
gi|33285929|gb|AY223844.1| scaffold104 90.72 797 62 5 1680  
2476 552484 553268 0.0 1053  
gi|33285929|gb|AY223844.1| scaffold104 88.33 771 71 14 1700  
2459 638733 639495 0.0 909  
gi|33285929|gb|AY223844.1| scaffold104 88.35 764 72 13 1700  
2459 553266 552516 0.0 904  
gi|33285929|gb|AY223844.1| scaffold104 99.65 283 1 0 2753  
3035 345961 346243 7e-144 518  
gi|33285929|gb|AY223844.1| scaffold104 99.29 280 1 1 2758  
3036 275250 274971 5e-140 505  
gi|33285929|gb|AY223844.1| scaffold104 97.87 282 4 2 2758  
3037 45087 45368 2e-134 486  
gi|33285929|gb|AY223844.1| scaffold104 97.88 283 2 4 2755  
3034 530691 530410 2e-134 486  
gi|33285929|gb|AY223844.1| scaffold104 96.85 286 5 1 2751  
3036 299707 299426 4e-131 475  
gi|33285929|gb|AY223844.1| scaffold104 96.49 285 8 2 2751  
3034 6269 6552 2e-129 470  
gi|33285929|gb|AY223844.1| scaffold104 96.76 278 7 2 2758  
3033 519132 518855 3e-127 462  
gi|33285929|gb|AY223844.1| scaffold104 96.06 279 11 0 2757  
3035 475130 474852 5e-125 455  
84  
gi|33285929|gb|AY223844.1| scaffold104 95.70 279 10 2 2758  
3034 10823 11101 9e-123 448  
gi|33285929|gb|AY223844.1| scaffold104 97.98 198 4 0 2839  
3036 195147 195344 1e-91 344  
gi|33285929|gb|AY223844.1| scaffold104 82.02 267 33 7 2753  
3004 86388 86122 3e-52 213  
gi|33285929|gb|AY223844.1| scaffold104 96.25 80 2 1 2764  
2843 186384 186462 4e-27 130

gi|33285929|gb|AY223844.1| scaffold16515 92.55 792 58 1 1683  
2473 7949 7158 0.0 1136  
gi|33285929|gb|AY223844.1| scaffold16515 88.01 767 69 17 1704  
2457 7162 7918 0.0 885  
gi|33285929|gb|AY223844.1| scaffold13797 92.07 807 63 1 1676  
2481 14234 13428 0.0 1136  
gi|33285929|gb|AY223844.1| scaffold13797 87.95 772 73 15 1700  
2459 13435 14198 0.0 894  
gi|33285929|gb|AY223844.1| scaffold9708 92.44 794 60 0 1683  
2476 43316 44109 0.0 1136  
gi|33285929|gb|AY223844.1| scaffold9708 88.33 771 71 14 1700  
2459 44107 43345 0.0 907  
gi|33285929|gb|AY223844.1| scaffold9708 97.86 281 4 2 2758  
3036 33519 33799 7e-134 484  
gi|33285929|gb|AY223844.1| scaffold9708 96.63 208 6 1 2745  
2951 24601 24808 1e-91 344  
gi|33285929|gb|AY223844.1| scaffold8674 92.45 795 58 2 1683  
2476 17871 18664 0.0 1136  
gi|33285929|gb|AY223844.1| scaffold8674 88.07 771 69 19 1700  
2457 18662 17902 0.0 893  
gi|33285929|gb|AY223844.1| scaffold8674 79.20 226 23 11 2792  
3002 2539 2323 8e-29 135  
gi|33285929|gb|AY223844.1| scaffold8521 92.44 794 60 0 1683  
2476 143802 144595 0.0 1136  
gi|33285929|gb|AY223844.1| scaffold8521 87.82 772 73 17 1700  
2459 144593 143831 0.0 885  
gi|33285929|gb|AY223844.1| scaffold8521 97.35 226 4 2 2757  
2981 48227 48003 2e-103 383  
gi|33285929|gb|AY223844.1| scaffold8521 91.39 151 13 0 2761  
2911 122087 121937 2e-50 207  
gi|33285929|gb|AY223844.1| scaffold6364 92.44 794 60 0 1683  
2476 28718 29511 0.0 1136  
gi|33285929|gb|AY223844.1| scaffold6364 88.33 771 71 13 1700  
2459 29509 28747 0.0 909  
gi|33285929|gb|AY223844.1| scaffold6364 98.56 278 3 1 2761  
3037 16188 15911 1e-135 490  
gi|33285929|gb|AY223844.1| scaffold5051 92.37 799 58 3 1683  
2480 49386 50182 0.0 1136  
gi|33285929|gb|AY223844.1| scaffold5051 88.76 756 67 11 1713  
2459 50160 49414 0.0 911  
gi|33285929|gb|AY223844.1| scaffold5051 83.23 167 23 3 2840  
3005 107411 107249 1e-32 148  
gi|33285929|gb|AY223844.1| scaffold3575 92.35 797 61 0 1683  
2479 95656 96452 0.0 1136  
85  
gi|33285929|gb|AY223844.1| scaffold3575 88.73 772 66 16 1700

2459 96447 95685 0.0 926  
gi|33285929|gb|AY223844.1| scaffold3575 97.83 276 6 0 2761  
3036 22200 22475 1e-131 477  
gi|33285929|gb|AY223844.1| scaffold3575 97.15 281 6 2 2758  
3036 73468 73748 1e-130 473  
gi|33285929|gb|AY223844.1| scaffold3405 92.45 795 58 2 1683  
2476 172434 173227 0.0 1136  
gi|33285929|gb|AY223844.1| scaffold3405 92.86 644 46 0 1774  
2417 165838 165195 0.0 937  
gi|33285929|gb|AY223844.1| scaffold3405 87.98 774 68 19 1700  
2459 173225 172463 0.0 891  
gi|33285929|gb|AY223844.1| scaffold3405 87.73 652 64 11 1754  
2397 165195 165838 0.0 747  
gi|33285929|gb|AY223844.1| scaffold3405 98.59 284 4 0 2753  
3036 39764 39481 2e-139 503  
gi|33285929|gb|AY223844.1| scaffold3405 91.32 311 26 1 1707  
2016 90424 90114 1e-115 424  
gi|33285929|gb|AY223844.1| scaffold3405 89.43 331 35 0 2157  
2487 90116 90446 7e-114 418  
gi|33285929|gb|AY223844.1| scaffold3405 97.37 152 2 2 2898  
3049 92343 92492 2e-65 257  
gi|33285929|gb|AY223844.1| scaffold2831 92.44 794 60 0 1683  
2476 188488 189281 0.0 1136  
gi|33285929|gb|AY223844.1| scaffold2831 88.65 749 69 10 1719  
2459 189257 188517 0.0 900  
gi|33285929|gb|AY223844.1| scaffold2831 92.45 331 25 0 2150  
2480 191536 191866 1e-130 473  
gi|33285929|gb|AY223844.1| scaffold2831 90.46 325 28 3 1700  
2021 191860 191536 4e-116 425  
gi|33285929|gb|AY223844.1| scaffold2781 92.44 794 60 0 1683  
2476 119038 118245 0.0 1136  
gi|33285929|gb|AY223844.1| scaffold2781 87.97 773 70 17 1700  
2459 118247 119009 0.0 891  
gi|33285929|gb|AY223844.1| scaffold2781 92.26 349 22 4 2137  
2483 74525 74870 1e-135 490  
gi|33285929|gb|AY223844.1| scaffold2781 97.85 279 5 1 2758  
3035 85902 86180 9e-133 481  
gi|33285929|gb|AY223844.1| scaffold2781 90.99 344 25 6 1694  
2032 74869 74527 4e-126 459  
gi|33285929|gb|AY223844.1| scaffold2781 96.00 250 9 1 2751  
3000 172816 172568 5e-110 405  
gi|33285929|gb|AY223844.1| scaffold2781 100.00 92 0 0  
2945 3036 77600 77509 2e-39 171  
gi|33285929|gb|AY223844.1| scaffold2781 98.90 91 1 0 2945  
3035 172569 172479 4e-37 163  
gi|33285929|gb|AY223844.1| scaffold2033 92.44 794 60 0 1683

2476 159814 160607 0.0 1136  
gi|33285929|gb|AY223844.1| scaffold2033 88.73 772 66 14 1700  
2459 160605 159843 0.0 924  
gi|33285929|gb|AY223844.1| scaffold2033 100.00 159 0 0  
2764 2922 251234 251076 1e-76 294  
86  
gi|33285929|gb|AY223844.1| scaffold2033 97.11 173 4 1 2755  
2927 199990 200161 2e-75 291  
gi|33285929|gb|AY223844.1| scaffold2033 93.22 118 4 4 2752  
2865 175775 175658 2e-39 171  
gi|33285929|gb|AY223844.1| scaffold963 92.45 795 58 2 1683  
2476 294575 295368 0.0 1136  
gi|33285929|gb|AY223844.1| scaffold963 93.22 738 50 0 1683  
2420 175052 174315 0.0 1088  
gi|33285929|gb|AY223844.1| scaffold963 87.92 770 74 13 1700  
2458 295366 294605 0.0 891  
gi|33285929|gb|AY223844.1| scaffold963 88.15 717 69 10 1751  
2459 174315 175023 0.0 841  
gi|33285929|gb|AY223844.1| scaffold963 100.00 273 0 0  
2764 3036 162329 162601 5e-140 505  
gi|33285929|gb|AY223844.1| scaffold963 98.24 284 4 1 2755  
3037 192593 192310 3e-137 496  
gi|33285929|gb|AY223844.1| scaffold963 97.50 280 5 2 2758  
3035 105508 105229 1e-131 477  
gi|33285929|gb|AY223844.1| scaffold963 97.06 272 7 1 2760  
3030 71404 71675 1e-125 457  
gi|33285929|gb|AY223844.1| scaffold963 97.73 264 6 0 2773  
3036 11831 12094 5e-125 455  
gi|33285929|gb|AY223844.1| scaffold963 96.11 180 3 4 2752  
2927 249913 250092 2e-75 291  
gi|33285929|gb|AY223844.1| scaffold963 86.07 244 34 0 2762  
3005 177842 177599 3e-67 263  
gi|33285929|gb|AY223844.1| scaffold963 91.39 151 13 0 2761  
2911 30596 30746 2e-50 207  
gi|33285929|gb|AY223844.1| scaffold614 91.97 809 65 0 1675  
2483 327035 327843 0.0 1136  
gi|33285929|gb|AY223844.1| scaffold614 87.71 773 72 19 1700  
2459 327834 327072 0.0 880  
gi|33285929|gb|AY223844.1| scaffold614 96.33 300 9 2 2752  
3050 397812 398110 4e-136 492  
gi|33285929|gb|AY223844.1| scaffold614 97.13 279 4 4 2758  
3035 118820 118545 7e-129 468  
gi|33285929|gb|AY223844.1| scaffold614 97.94 194 4 0 2844  
3037 204466 204659 2e-89 337  
gi|33285929|gb|AY223844.1| scaffold614 95.05 202 8 2 2758  
2957 203913 204114 3e-83 316

gi|33285929|gb|AY223844.1| scaffold614 83.33 294 38 8 2751  
3036 118184 118474 1e-66 261  
gi|33285929|gb|AY223844.1| scaffold614 94.81 135 3 4 2752  
2882 326908 327042 2e-50 207  
gi|33285929|gb|AY223844.1| scaffold614 98.96 96 1 0 2941  
3036 327889 327984 6e-40 172  
gi|33285929|gb|AY223844.1| scaffold614 96.34 82 3 0 3209  
3290 164810 164729 8e-29 135  
gi|33285929|gb|AY223844.1| scaffold538 92.45 795 58 2 1683  
2476 115218 116011 0.0 1136  
gi|33285929|gb|AY223844.1| scaffold538 88.75 773 64 16 1700  
2459 116009 115247 0.0 926  
87  
gi|33285929|gb|AY223844.1| scaffold538 96.47 283 9 1 2755  
3036 348689 348407 2e-128 466  
gi|33285929|gb|AY223844.1| scaffold538 95.79 285 9 3 2755  
3036 328975 329259 1e-125 457  
gi|33285929|gb|AY223844.1| scaffold327 92.26 801 60 2 1681  
2480 150377 149578 0.0 1136  
gi|33285929|gb|AY223844.1| scaffold327 91.33 796 69 0 1686  
2481 444326 445121 0.0 1090  
gi|33285929|gb|AY223844.1| scaffold327 88.21 772 70 15 1700  
2459 149584 150346 0.0 902  
gi|33285929|gb|AY223844.1| scaffold327 87.71 773 72 17 1700  
2459 445114 444352 0.0 880  
gi|33285929|gb|AY223844.1| scaffold327 97.92 289 2 4 2750  
3035 294578 294291 9e-138 497  
gi|33285929|gb|AY223844.1| scaffold327 97.54 284 6 1 2755  
3037 445877 446160 7e-134 484  
gi|33285929|gb|AY223844.1| scaffold327 97.19 285 5 3 2755  
3036 84325 84609 3e-132 479  
gi|33285929|gb|AY223844.1| scaffold327 97.50 280 3 4 2758  
3035 13913 14190 4e-131 475  
gi|33285929|gb|AY223844.1| scaffold327 98.14 269 5 0 2764  
3032 482063 481795 2e-129 470  
gi|33285929|gb|AY223844.1| scaffold327 96.10 282 7 4 2748  
3027 53899 54178 1e-125 457  
gi|33285929|gb|AY223844.1| scaffold327 92.01 288 4 8 2752  
3036 30729 30458 2e-104 387  
gi|33285929|gb|AY223844.1| scaffold327 93.22 236 1 6 2754  
2988 320468 320247 3e-88 333  
gi|33285929|gb|AY223844.1| scaffold327 85.92 277 35 4 2761  
3036 15054 15327 4e-76 292  
gi|33285929|gb|AY223844.1| scaffold327 89.52 124 11 2 2751  
2872 81453 81330 6e-35 156  
gi|33285929|gb|AY223844.1| scaffold327 100.00 79 0 0

2958 3036 443179 443257 4e-32 147  
gi|33285929|gb|AY223844.1| scaffold327 100.00 53 0 0  
2983 3035 319797 319745 1e-17 99.0  
gi|33285929|gb|AY223844.1| scaffold211 92.44 794 60 0 1683  
2476 87758 88551 0.0 1136  
gi|33285929|gb|AY223844.1| scaffold211 87.71 773 72 17 1700  
2459 88549 87787 0.0 880  
gi|33285929|gb|AY223844.1| scaffold211 98.58 281 4 0 2756  
3036 255095 255375 9e-138 497  
gi|33285929|gb|AY223844.1| scaffold211 94.92 295 10 3 2747  
3036 529272 528978 1e-125 457  
gi|33285929|gb|AY223844.1| scaffold211 96.72 274 5 4 2752  
3021 342692 342965 2e-124 453  
gi|33285929|gb|AY223844.1| scaffold211 86.81 144 14 4 2797  
2935 486132 485989 6e-35 156  
gi|33285929|gb|AY223844.1| scaffold139 92.45 795 58 2 1683  
2476 375731 374938 0.0 1136  
gi|33285929|gb|AY223844.1| scaffold139 87.98 774 68 18 1700  
2459 374940 375702 0.0 893  
88  
gi|33285929|gb|AY223844.1| scaffold139 92.54 429 32 0 2048  
2476 98730 98302 6e-174 617  
gi|33285929|gb|AY223844.1| scaffold139 91.64 359 27 3 1700  
2055 98304 98662 1e-136 494  
gi|33285929|gb|AY223844.1| scaffold139 82.00 250 40 5 2755  
3001 216345 216592 2e-50 207  
gi|33285929|gb|AY223844.1| scaffold139 81.10 254 43 5 2751  
3001 222872 222621 1e-47 198  
gi|33285929|gb|AY223844.1| scaffold12586 91.96 808 65 0 1674  
2481 34879 34072 0.0 1134  
gi|33285929|gb|AY223844.1| scaffold12586 88.73 772 66 15 1700  
2459 34079 34841 0.0 926  
gi|33285929|gb|AY223844.1| scaffold12493 91.88 813 63 3 1680  
2492 14087 13278 0.0 1134  
gi|33285929|gb|AY223844.1| scaffold12493 88.33 771 69 16 1700  
2459 13295 14055 0.0 907  
gi|33285929|gb|AY223844.1| scaffold11239 92.35 797 59 2 1683  
2478 6146 6941 0.0 1134  
gi|33285929|gb|AY223844.1| scaffold11239 88.10 773 69 16 1700  
2459 6937 6175 0.0 898  
gi|33285929|gb|AY223844.1| scaffold10331 92.37 799 56 4 1681  
2476 36652 35856 0.0 1134  
gi|33285929|gb|AY223844.1| scaffold10331 88.92 758 63 15 1713  
2459 35874 36621 0.0 915  
gi|33285929|gb|AY223844.1| scaffold10331 100.00 156 0 0  
2881 3036 31339 31494 6e-75 289

gi|33285929|gb|AY223844.1| scaffold10331 96.12 129 4 1 2758  
2885 30217 30345 4e-51 209  
gi|33285929|gb|AY223844.1| scaffold9078 92.34 796 61 0 1681  
2476 39924 39129 0.0 1134  
gi|33285929|gb|AY223844.1| scaffold9078 89.06 768 62 18 1704  
2459 39136 39893 0.0 933  
gi|33285929|gb|AY223844.1| scaffold9059 91.97 809 63 2 1673  
2480 21906 21099 0.0 1134  
gi|33285929|gb|AY223844.1| scaffold9059 88.23 773 68 18 1700  
2459 21105 21867 0.0 904  
gi|33285929|gb|AY223844.1| scaffold9059 96.42 279 8 2 2758  
3034 64391 64669 4e-126 459  
gi|33285929|gb|AY223844.1| scaffold7792 91.96 808 65 0 1673  
2480 26400 27207 0.0 1134  
gi|33285929|gb|AY223844.1| scaffold7792 88.24 774 66 19 1700  
2459 27201 26439 0.0 902  
gi|33285929|gb|AY223844.1| scaffold7792 88.36 189 21 1 1687  
1874 19343 19531 4e-56 226  
gi|33285929|gb|AY223844.1| scaffold7792 88.34 163 18 1 2298  
2459 19530 19368 1e-46 195  
gi|33285929|gb|AY223844.1| scaffold7792 90.79 76 5 2 2887  
2961 53422 53496 3e-18 100  
gi|33285929|gb|AY223844.1| scaffold5897 92.44 794 59 1 1683  
2476 23027 23819 0.0 1134  
gi|33285929|gb|AY223844.1| scaffold5897 87.71 773 71 19 1700  
2459 23817 23056 0.0 880  
89  
gi|33285929|gb|AY223844.1| scaffold5897 97.86 281 6 0 2751  
3031 67416 67136 2e-134 486  
gi|33285929|gb|AY223844.1| scaffold5897 95.08 264 4 4 2764  
3027 50537 50283 1e-110 407  
gi|33285929|gb|AY223844.1| scaffold3626 92.34 796 61 0 1681  
2476 41343 40548 0.0 1134  
gi|33285929|gb|AY223844.1| scaffold3626 87.06 773 77 17 1700  
2459 40550 41312 0.0 852  
gi|33285929|gb|AY223844.1| scaffold3626 92.02 426 34 0 2034  
2459 11452 11027 6e-169 601  
gi|33285929|gb|AY223844.1| scaffold3626 93.03 373 26 0 1683  
2055 10998 11370 3e-152 545  
gi|33285929|gb|AY223844.1| scaffold3626 98.90 273 3 0 2764  
3036 90225 89953 5e-135 488  
gi|33285929|gb|AY223844.1| scaffold3626 97.24 290 2 6 2754  
3038 174785 175073 2e-134 486  
gi|33285929|gb|AY223844.1| scaffold3626 100.00 35 0 0  
3174 3208 162087 162121 1e-07 65.8  
gi|33285929|gb|AY223844.1| scaffold3296 92.05 805 64 0 1676



2480 104128 104932 0.0 1134  
gi|33285929|gb|AY223844.1| scaffold3296 88.38 757 67 15 1714  
2459 104910 104164 0.0 891  
gi|33285929|gb|AY223844.1| scaffold3296 97.05 237 6 1 2759  
2995 133322 133087 9e-108 398  
gi|33285929|gb|AY223844.1| scaffold3043 92.44 794 59 1 1683  
2476 76995 76203 0.0 1134  
gi|33285929|gb|AY223844.1| scaffold3043 88.72 771 67 14 1700  
2459 76205 76966 0.0 924  
gi|33285929|gb|AY223844.1| scaffold3043 91.38 487 40 2 1683  
2169 70857 71341 0.0 667  
gi|33285929|gb|AY223844.1| scaffold3043 91.25 320 28 0 2157  
2476 74555 74874 2e-119 436  
gi|33285929|gb|AY223844.1| scaffold3043 91.51 318 24 3 1700  
2014 74872 74555 7e-119 435  
gi|33285929|gb|AY223844.1| scaffold3043 83.91 466 57 12 2002  
2459 71341 70886 9e-118 431  
gi|33285929|gb|AY223844.1| scaffold3043 80.62 227 23 7 2761  
2978 77030 77244 6e-35 156  
gi|33285929|gb|AY223844.1| scaffold2378 92.44 794 59 1 1683  
2476 134428 133636 0.0 1134  
gi|33285929|gb|AY223844.1| scaffold2378 88.17 769 71 14 1700  
2457 133638 134397 0.0 898  
gi|33285929|gb|AY223844.1| scaffold2378 98.24 284 2 3 2752  
3033 26932 26650 1e-136 494  
gi|33285929|gb|AY223844.1| scaffold2378 92.72 151 11 0 2761  
2911 121699 121549 7e-54 219  
gi|33285929|gb|AY223844.1| scaffold1788 92.05 805 64 0 1679  
2483 128130 127326 0.0 1134  
gi|33285929|gb|AY223844.1| scaffold1788 87.84 773 71 17 1700  
2459 127335 128097 0.0 885  
gi|33285929|gb|AY223844.1| scaffold1788 92.53 495 37 0 1984  
2478 126051 126545 0.0 712  
90  
gi|33285929|gb|AY223844.1| scaffold1788 87.60 484 42 12 1713  
2187 126525 126051 3e-152 545  
gi|33285929|gb|AY223844.1| scaffold1788 98.23 283 3 2 2754  
3035 139898 139617 1e-136 494  
gi|33285929|gb|AY223844.1| scaffold1788 98.56 278 4 0 2758  
3035 262587 262310 4e-136 492  
gi|33285929|gb|AY223844.1| scaffold1788 96.70 273 9 0 2764  
3036 82374 82646 5e-125 455  
gi|33285929|gb|AY223844.1| scaffold1788 92.63 312 23 0 1681  
1992 125416 125727 2e-123 449  
gi|33285929|gb|AY223844.1| scaffold1788 90.39 281 27 0 2179  
2459 125727 125447 2e-99 370

gi|33285929|gb|AY223844.1| scaffold1286 92.35 797 60 1 1683  
2479 271999 272794 0.0 1134  
gi|33285929|gb|AY223844.1| scaffold1286 87.73 774 69 20 1700  
2459 272789 272028 0.0 880  
gi|33285929|gb|AY223844.1| scaffold1286 86.45 502 31 12 1681  
2179 170825 171292 7e-144 518  
gi|33285929|gb|AY223844.1| scaffold1286 99.64 275 1 0 2761  
3035 141049 140775 2e-139 503  
gi|33285929|gb|AY223844.1| scaffold1286 97.87 282 4 2 2758  
3037 207333 207052 2e-134 486  
gi|33285929|gb|AY223844.1| scaffold1286 97.21 287 4 4 2752  
3036 45223 44939 2e-133 483  
gi|33285929|gb|AY223844.1| scaffold1286 91.61 298 21 4 1700  
1993 171809 171512 4e-111 409  
gi|33285929|gb|AY223844.1| scaffold1286 90.67 300 27 1 2178  
2476 171512 171811 9e-108 398  
gi|33285929|gb|AY223844.1| scaffold1286 84.76 315 23 8 2146  
2458 171145 170854 4e-76 292  
gi|33285929|gb|AY223844.1| scaffold1286 100.00 95 0 0  
2758 2852 97042 97136 5e-41 176  
gi|33285929|gb|AY223844.1| scaffold1286 100.00 82 0 0  
2950 3031 97236 97317 8e-34 152  
gi|33285929|gb|AY223844.1| scaffold1286 100.00 33 0 0  
3177 3209 277418 277450 1e-06 62.1  
gi|33285929|gb|AY223844.1| scaffold1286 100.00 28 0 0  
3173 3200 63632 63659 8e-04 52.8  
gi|33285929|gb|AY223844.1| scaffold902 92.35 797 59 2 1681  
2476 99242 100037 0.0 1134  
gi|33285929|gb|AY223844.1| scaffold902 87.55 771 77 13 1700  
2459 100035 99273 0.0 876  
gi|33285929|gb|AY223844.1| scaffold902 99.28 276 2 0 2764  
3039 279993 279718 2e-138 499  
gi|33285929|gb|AY223844.1| scaffold902 96.86 287 8 1 2750  
3036 114309 114594 3e-132 479  
gi|33285929|gb|AY223844.1| scaffold902 96.42 279 5 3 2754  
3032 266509 266782 5e-125 455  
gi|33285929|gb|AY223844.1| scaffold902 94.87 78 1 3 2752  
2826 160878 160955 8e-24 119  
gi|33285929|gb|AY223844.1| scaffold726 92.06 806 62 2 1679  
2483 19714 18910 0.0 1134  
91  
gi|33285929|gb|AY223844.1| scaffold726 87.58 781 74 17 1692  
2459 18911 19681 0.0 885  
gi|33285929|gb|AY223844.1| scaffold726 97.55 286 7 0 2751  
3036 253460 253175 1e-135 490  
gi|33285929|gb|AY223844.1| scaffold726 97.86 281 4 2 2758

3036 473884 474164 7e-134 484  
gi|33285929|gb|AY223844.1| scaffold726 97.86 280 4 2 2764  
3041 594947 595226 2e-133 483  
gi|33285929|gb|AY223844.1| scaffold726 98.53 272 4 0 2764  
3035 678506 678235 9e-133 481  
gi|33285929|gb|AY223844.1| scaffold726 95.59 295 11 2 2746  
3040 72652 72360 5e-130 472  
gi|33285929|gb|AY223844.1| scaffold726 96.09 281 9 2 2758  
3036 48669 48389 1e-125 457  
gi|33285929|gb|AY223844.1| scaffold726 94.85 291 11 4 2755  
3042 506557 506846 7e-124 451  
gi|33285929|gb|AY223844.1| scaffold726 93.92 296 13 4 2748  
3038 174601 174306 4e-121 442  
gi|33285929|gb|AY223844.1| scaffold726 93.64 283 8 5 2756  
3036 405550 405276 9e-113 414  
gi|33285929|gb|AY223844.1| scaffold726 97.49 239 6 0 2797  
3035 82557 82795 4e-111 409  
gi|33285929|gb|AY223844.1| scaffold726 95.81 215 7 2 2758  
2970 22069 22283 3e-92 346  
gi|33285929|gb|AY223844.1| scaffold726 95.54 202 7 2 2758  
2957 235818 236019 6e-85 322  
gi|33285929|gb|AY223844.1| scaffold726 98.29 175 2 1 2756  
2929 494534 494360 6e-80 305  
gi|33285929|gb|AY223844.1| scaffold726 100.00 36 0 0  
3173 3208 41839 41804 3e-08 67.6  
gi|33285929|gb|AY223844.1| scaffold694 92.34 796 61 0 1681  
2476 55414 54619 0.0 1134  
gi|33285929|gb|AY223844.1| scaffold694 88.87 755 70 9 1712  
2459 54636 55383 0.0 918  
gi|33285929|gb|AY223844.1| scaffold694 89.29 439 45 2 1683  
2121 239637 240073 6e-154 551  
gi|33285929|gb|AY223844.1| scaffold694 91.69 337 27 1 2123  
2459 240000 239665 2e-128 466  
gi|33285929|gb|AY223844.1| scaffold694 97.45 196 4 1 2751  
2946 354769 354963 3e-88 333  
gi|33285929|gb|AY223844.1| scaffold649 92.35 797 60 1 1683  
2479 374611 373816 0.0 1134  
gi|33285929|gb|AY223844.1| scaffold649 88.83 770 64 17 1700  
2457 373821 374580 0.0 928  
gi|33285929|gb|AY223844.1| scaffold649 98.94 284 3 0 2751  
3034 182946 182663 4e-141 508  
gi|33285929|gb|AY223844.1| scaffold649 97.17 283 6 2 2758  
3038 106852 107134 1e-131 477  
gi|33285929|gb|AY223844.1| scaffold649 95.07 284 12 2 2745  
3026 277033 277316 3e-122 446  
gi|33285929|gb|AY223844.1| scaffold649 97.98 247 3 2 2769

3015 137023 137267 1e-116 427  
92  
gi|33285929|gb|AY223844.1| scaffold649 97.12 104 1 2 2833  
2934 277420 277317 2e-40 174  
gi|33285929|gb|AY223844.1| scaffold649 100.00 49 0 0  
2764 2812 277462 277414 2e-15 91.6  
gi|33285929|gb|AY223844.1| scaffold15456 92.36 798 55 5 1683  
2479 5180 4388 0.0 1133  
gi|33285929|gb|AY223844.1| scaffold15456 88.14 776 73 15 1693  
2459 4386 5151 0.0 907  
gi|33285929|gb|AY223844.1| scaffold6304 92.25 800 58 3 1686  
2483 68193 67396 0.0 1133  
gi|33285929|gb|AY223844.1| scaffold6304 88.36 756 70 13 1713  
2459 67421 68167 0.0 894  
gi|33285929|gb|AY223844.1| scaffold6304 96.83 284 9 0 2751  
3034 15137 15420 4e-131 475  
gi|33285929|gb|AY223844.1| scaffold6304 96.80 281 9 0 2756  
3036 48865 49145 2e-129 470  
gi|33285929|gb|AY223844.1| scaffold1745 92.24 799 60 2 1683  
2480 247910 248707 0.0 1133  
gi|33285929|gb|AY223844.1| scaffold1745 88.43 769 74 12 1700  
2459 248701 247939 0.0 915  
gi|33285929|gb|AY223844.1| scaffold1164 92.23 798 62 0 1683  
2480 39175 38378 0.0 1133  
gi|33285929|gb|AY223844.1| scaffold1164 87.94 771 74 14 1700  
2459 38384 39146 0.0 893  
gi|33285929|gb|AY223844.1| scaffold1164 98.90 272 3 0 2764  
3035 236177 236448 2e-134 486  
gi|33285929|gb|AY223844.1| scaffold1164 97.53 283 7 0 2755  
3037 191772 192054 7e-134 484  
gi|33285929|gb|AY223844.1| scaffold1164 96.82 283 7 2 2758  
3038 272234 271952 5e-130 472  
gi|33285929|gb|AY223844.1| scaffold1164 97.79 272 6 0 2764  
3035 250945 251216 2e-129 470  
gi|33285929|gb|AY223844.1| scaffold1164 84.23 241 30 3 2796  
3030 28535 28297 1e-56 228  
gi|33285929|gb|AY223844.1| scaffold1164 94.44 126 7 0 2751  
2876 282646 282771 1e-46 195  
gi|33285929|gb|AY223844.1| scaffold1164 81.45 248 32 5 2755  
3002 255260 255027 2e-45 191  
gi|33285929|gb|AY223844.1| scaffold1164 92.80 125 6 3 2755  
2876 91976 91852 1e-41 178  
gi|33285929|gb|AY223844.1| scaffold1164 98.96 96 0 1 2943  
3038 91687 91593 2e-39 171  
gi|33285929|gb|AY223844.1| scaffold863 92.34 796 60 1 1683  
2477 297562 298357 0.0 1133

gi|33285929|gb|AY223844.1| scaffold863 88.08 772 72 14 1700  
2459 298354 297591 0.0 900  
gi|33285929|gb|AY223844.1| scaffold863 97.43 272 7 0 2764  
3035 340882 340611 9e-128 464  
gi|33285929|gb|AY223844.1| scaffold863 97.27 256 6 1 2782  
3036 218886 219141 2e-118 433  
gi|33285929|gb|AY223844.1| scaffold863 86.11 72 8 1 2827  
2896 326625 326696 5e-11 76.8  
93  
gi|33285929|gb|AY223844.1| scaffold74 92.23 798 62 0 1683 2480  
407973 407176 0.0 1133  
gi|33285929|gb|AY223844.1| scaffold74 92.15 764 55 5 1700 2459  
378388 377626 0.0 1075  
gi|33285929|gb|AY223844.1| scaffold74 91.74 763 60 3 1700 2459  
162465 161703 0.0 1059  
gi|33285929|gb|AY223844.1| scaffold74 88.59 806 72 15 1681 2476  
161672 162467 0.0 963  
gi|33285929|gb|AY223844.1| scaffold74 88.07 805 74 16 1683 2476  
377597 378390 0.0 935  
gi|33285929|gb|AY223844.1| scaffold74 88.20 771 72 14 1700 2459  
407182 407944 0.0 904  
gi|33285929|gb|AY223844.1| scaffold74 97.90 286 6 0 2751 3036  
243987 243702 3e-137 496  
gi|33285929|gb|AY223844.1| scaffold74 95.29 276 13 0 2764 3039  
229022 229297 5e-120 438  
gi|33285929|gb|AY223844.1| scaffold74 97.59 249 3 3 2753 3000  
40834 41080 1e-115 424  
gi|33285929|gb|AY223844.1| scaffold74 95.80 238 7 3 2755 2989  
147434 147197 9e-103 381  
gi|33285929|gb|AY223844.1| scaffold74 86.51 252 26 6 2759 3008  
391788 391543 2e-69 270  
gi|33285929|gb|AY223844.1| scaffold14981 92.32 794 61 0 1683  
2476 1748 955 0.0 1131  
gi|33285929|gb|AY223844.1| scaffold14981 87.29 771 79 14 1700  
2459 957 1719 0.0 863  
gi|33285929|gb|AY223844.1| scaffold11615 92.32 794 61 0 1683  
2476 40820 40027 0.0 1131  
gi|33285929|gb|AY223844.1| scaffold11615 87.56 772 75 15 1700  
2459 40029 40791 0.0 874  
gi|33285929|gb|AY223844.1| scaffold11615 97.10 276 6 2 2761  
3035 3671 3397 9e-128 464  
gi|33285929|gb|AY223844.1| scaffold10815 92.33 795 60 1 1683  
2476 41201 41995 0.0 1131  
gi|33285929|gb|AY223844.1| scaffold10815 88.34 772 69 15 1700  
2459 41993 41231 0.0 909  
gi|33285929|gb|AY223844.1| scaffold10815 96.76 278 6 2 2754

3028 5564 5841 1e-126 460  
gi|33285929|gb|AY223844.1| scaffold10815 97.96 196 2 2 2758  
2951 49581 49776 5e-90 339  
gi|33285929|gb|AY223844.1| scaffold9095 92.44 794 55 1 1683  
2476 65991 66779 0.0 1131  
gi|33285929|gb|AY223844.1| scaffold9095 87.60 766 77 12 1700  
2457 66777 66022 0.0 874  
gi|33285929|gb|AY223844.1| scaffold9095 98.94 283 2 1 2758  
3039 64807 64525 5e-140 505  
gi|33285929|gb|AY223844.1| scaffold9042 92.35 797 56 3 1683  
2479 12446 13237 0.0 1131  
gi|33285929|gb|AY223844.1| scaffold9042 88.31 770 68 17 1700  
2459 13232 12475 0.0 905  
gi|33285929|gb|AY223844.1| scaffold8447 92.32 794 61 0 1683  
2476 15473 16266 0.0 1131  
94  
gi|33285929|gb|AY223844.1| scaffold8447 87.55 771 77 13 1700  
2459 16264 15502 0.0 876  
gi|33285929|gb|AY223844.1| scaffold6881 92.32 794 61 0 1683  
2476 82820 82027 0.0 1131  
gi|33285929|gb|AY223844.1| scaffold6881 88.20 771 72 14 1700  
2459 82029 82791 0.0 904  
gi|33285929|gb|AY223844.1| scaffold5932 92.22 797 62 0 1683  
2479 89407 88611 0.0 1131  
gi|33285929|gb|AY223844.1| scaffold5932 92.14 763 57 3 1700  
2459 37193 36431 0.0 1075  
gi|33285929|gb|AY223844.1| scaffold5932 88.37 808 74 14 1681  
2478 36400 37197 0.0 953  
gi|33285929|gb|AY223844.1| scaffold5932 87.71 773 72 16 1700  
2459 88616 89378 0.0 881  
gi|33285929|gb|AY223844.1| scaffold5111 92.35 797 56 4 1683  
2476 87855 87061 0.0 1131  
gi|33285929|gb|AY223844.1| scaffold5111 87.98 774 69 18 1700  
2459 87063 87826 0.0 893  
gi|33285929|gb|AY223844.1| scaffold5111 97.88 283 4 2 2752  
3032 65740 65458 5e-135 488  
gi|33285929|gb|AY223844.1| scaffold5111 95.96 297 8 4 2758  
3050 49421 49717 3e-132 479  
gi|33285929|gb|AY223844.1| scaffold4903 92.33 795 59 2 1683  
2476 44096 43303 0.0 1131  
gi|33285929|gb|AY223844.1| scaffold4903 87.55 771 73 17 1700  
2457 43305 44065 0.0 870  
gi|33285929|gb|AY223844.1| scaffold4903 97.89 285 3 3 2755  
3036 48682 48398 1e-135 490  
gi|33285929|gb|AY223844.1| scaffold4903 96.80 281 7 2 2757  
3036 100298 100019 7e-129 468

gi|33285929|gb|AY223844.1| scaffold3335 92.33 795 60 1 1683  
2476 120354 119560 0.0 1131  
gi|33285929|gb|AY223844.1| scaffold3335 88.50 765 66 18 1707  
2459 119571 120325 0.0 905  
gi|33285929|gb|AY223844.1| scaffold3335 98.26 287 3 2 2751  
3036 77748 78033 7e-139 501  
gi|33285929|gb|AY223844.1| scaffold3335 98.08 261 3 2 2751  
3010 62356 62097 2e-124 453  
gi|33285929|gb|AY223844.1| scaffold3335 95.09 285 11 3 2753  
3034 19219 18935 3e-122 446  
gi|33285929|gb|AY223844.1| scaffold3335 91.13 293 15 4 2751  
3038 180582 180868 2e-104 387  
gi|33285929|gb|AY223844.1| scaffold3335 98.95 95 1 0 2940  
3034 102067 101973 2e-39 171  
gi|33285929|gb|AY223844.1| scaffold2751 92.32 794 61 0 1683  
2476 67865 67072 0.0 1131  
gi|33285929|gb|AY223844.1| scaffold2751 88.07 771 69 17 1700  
2457 67074 67834 0.0 893  
gi|33285929|gb|AY223844.1| scaffold2751 98.19 276 5 0 2764  
3039 206783 207058 2e-133 483  
gi|33285929|gb|AY223844.1| scaffold2751 84.07 182 23 5 2828  
3003 97344 97525 2e-39 171  
95  
gi|33285929|gb|AY223844.1| scaffold2751 96.08 51 2 0 2955  
3005 83971 83921 3e-13 84.2  
gi|33285929|gb|AY223844.1| scaffold2643\_0 92.22 797 62 0 1683  
2479 34135 34931 0.0 1131  
gi|33285929|gb|AY223844.1| scaffold2643\_0 88.70 752 71 9 1713  
2457 34910 34166 0.0 907  
gi|33285929|gb|AY223844.1| scaffold2643\_0 96.26 294 7 4 2748  
3037 63931 64224 3e-132 479  
gi|33285929|gb|AY223844.1| scaffold2488 92.24 799 58 3 1683  
2479 148396 149192 0.0 1131  
gi|33285929|gb|AY223844.1| scaffold2488 88.08 755 74 10 1713  
2459 149171 148425 0.0 883  
gi|33285929|gb|AY223844.1| scaffold2087 92.33 795 59 2 1683  
2476 194051 194844 0.0 1131  
gi|33285929|gb|AY223844.1| scaffold2087 87.79 770 73 16 1700  
2457 194842 194082 0.0 883  
gi|33285929|gb|AY223844.1| scaffold2087 98.57 280 3 1 2758  
3036 243137 242858 1e-136 494  
gi|33285929|gb|AY223844.1| scaffold2087 97.79 272 6 0 2764  
3035 164058 163787 2e-129 470  
gi|33285929|gb|AY223844.1| scaffold2087 95.99 274 10 1 2761  
3033 150803 151076 1e-121 444  
gi|33285929|gb|AY223844.1| scaffold719 92.33 795 59 2 1683

2476 163878 164671 0.0 1131  
gi|33285929|gb|AY223844.1| scaffold719 91.58 796 66 1 1681  
2476 212084 211290 0.0 1099  
gi|33285929|gb|AY223844.1| scaffold719 88.57 770 65 17 1700  
2456 211292 212051 0.0 913  
gi|33285929|gb|AY223844.1| scaffold719 87.86 774 69 19 1700  
2459 164669 163907 0.0 885  
gi|33285929|gb|AY223844.1| scaffold719 97.17 283 7 1 2751  
3032 94480 94198 1e-131 477  
gi|33285929|gb|AY223844.1| scaffold719 95.45 110 3 2 2757  
2865 14717 14825 2e-40 174  
gi|33285929|gb|AY223844.1| scaffold515 92.34 796 57 4 1683  
2476 158356 159149 0.0 1131  
gi|33285929|gb|AY223844.1| scaffold515 88.52 758 65 16 1713  
2459 159131 158385 0.0 898  
gi|33285929|gb|AY223844.1| scaffold515 96.91 291 4 5 2755  
3042 164641 164353 2e-133 483  
gi|33285929|gb|AY223844.1| scaffold515 96.14 285 11 0 2752  
3036 339138 339422 2e-128 466  
gi|33285929|gb|AY223844.1| scaffold515 95.79 285 9 3 2755  
3036 150826 151110 1e-125 457  
gi|33285929|gb|AY223844.1| scaffold515 91.36 81 7 0 3209  
3289 98885 98805 1e-21 111  
gi|33285929|gb|AY223844.1| scaffold515 82.64 121 15 2 2761  
2881 155276 155390 8e-19 102  
gi|33285929|gb|AY223844.1| scaffold515 84.72 72 11 0 2964  
3035 281549 281620 6e-10 73.1  
gi|33285929|gb|AY223844.1| scaffold515 97.50 40 1 0 3169  
3208 131897 131936 8e-09 69.4  
96  
gi|33285929|gb|AY223844.1| scaffold515 100.00 28 0 0  
3173 3200 332994 332967 8e-04 52.8  
gi|33285929|gb|AY223844.1| scaffold193 92.32 794 61 0 1683  
2476 113336 112543 0.0 1131  
gi|33285929|gb|AY223844.1| scaffold193 89.01 755 67 10 1713  
2459 112561 113307 0.0 922  
gi|33285929|gb|AY223844.1| scaffold193 99.64 281 1 0 2756  
3036 353097 352817 8e-143 514  
gi|33285929|gb|AY223844.1| scaffold193 98.55 275 4 0 2764  
3038 224325 224599 2e-134 486  
gi|33285929|gb|AY223844.1| scaffold193 97.23 289 4 4 2752  
3036 446014 445726 2e-134 486  
gi|33285929|gb|AY223844.1| scaffold193 97.82 275 5 1 2764  
3038 147127 147400 1e-130 473  
gi|33285929|gb|AY223844.1| scaffold193 96.81 282 7 2 2757  
3036 155529 155248 2e-129 470



gi|33285929|gb|AY223844.1| scaffold193 96.35 274 10 0 2764  
3037 137469 137742 7e-124 451  
gi|33285929|gb|AY223844.1| scaffold193 98.89 90 1 0 2843  
2932 164344 164433 1e-36 161  
gi|33285929|gb|AY223844.1| scaffold193 88.16 76 9 0 2951  
3026 31027 30952 2e-15 91.6  
gi|33285929|gb|AY223844.1| scaffold193 100.00 34 0 0  
3174 3207 97951 97918 4e-07 63.9  
gi|33285929|gb|AY223844.1| scaffold193 100.00 33 0 0  
3174 3206 87069 87101 1e-06 62.1  
gi|33285929|gb|AY223844.1| scaffold13557 92.32 794 60 1 1683  
2476 17487 18279 0.0 1129  
gi|33285929|gb|AY223844.1| scaffold13557 88.75 773 63 18 1700  
2459 18277 17516 0.0 924  
gi|33285929|gb|AY223844.1| scaffold8707 91.89 814 54 7 1678  
2480 57368 58180 0.0 1129  
gi|33285929|gb|AY223844.1| scaffold8707 87.99 783 60 22 1700  
2459 58174 57403 0.0 894  
gi|33285929|gb|AY223844.1| scaffold8707 95.18 83 4 0 3208  
3290 16473 16391 1e-27 132  
gi|33285929|gb|AY223844.1| scaffold3233 91.93 805 65 0 1676  
2480 151109 150305 0.0 1129  
gi|33285929|gb|AY223844.1| scaffold3233 88.36 773 67 17 1700  
2459 150311 151073 0.0 907  
gi|33285929|gb|AY223844.1| scaffold3233 92.99 371 26 0 1683  
2053 19738 19368 4e-151 542  
gi|33285929|gb|AY223844.1| scaffold3233 93.41 334 22 0 2123  
2456 19373 19706 3e-137 496  
gi|33285929|gb|AY223844.1| scaffold3233 99.26 271 2 0 2765  
3035 184075 183805 1e-135 490  
gi|33285929|gb|AY223844.1| scaffold3233 89.77 88 9 0 2764  
2851 109686 109599 4e-22 113  
gi|33285929|gb|AY223844.1| scaffold3233 94.37 71 4 0 2841  
2911 106395 106325 5e-21 110  
gi|33285929|gb|AY223844.1| scaffold2467 92.12 800 61 1 1683  
2480 80785 81584 0.0 1129  
97  
gi|33285929|gb|AY223844.1| scaffold2467 88.24 774 68 19 1700  
2459 81578 80814 0.0 904  
gi|33285929|gb|AY223844.1| scaffold2467 98.22 281 2 2 2758  
3037 161166 160888 5e-135 488  
gi|33285929|gb|AY223844.1| scaffold2467 98.53 273 4 0 2761  
3033 153877 153605 2e-133 483  
gi|33285929|gb|AY223844.1| scaffold1698 92.22 797 61 1 1683  
2479 38800 39595 0.0 1129  
gi|33285929|gb|AY223844.1| scaffold1698 87.21 766 79 13 1704

2459 39585 38829 0.0 856  
gi|33285929|gb|AY223844.1| scaffold1698 97.86 281 5 1 2758  
3037 161210 160930 7e-134 484  
gi|33285929|gb|AY223844.1| scaffold883 91.96 808 60 2 1674  
2481 104039 103237 0.0 1129  
gi|33285929|gb|AY223844.1| scaffold883 87.29 771 74 19 1700  
2459 103244 104001 0.0 861  
gi|33285929|gb|AY223844.1| scaffold883 96.40 278 9 1 2761  
3037 333998 334275 1e-125 457  
gi|33285929|gb|AY223844.1| scaffold883 95.73 281 8 4 2752  
3029 131418 131139 2e-123 449  
gi|33285929|gb|AY223844.1| scaffold883 96.91 259 5 3 2754  
3010 147175 147432 9e-118 431  
gi|33285929|gb|AY223844.1| scaffold883 97.26 146 2 1 2866  
3011 255258 255401 3e-62 246  
gi|33285929|gb|AY223844.1| scaffold883 94.25 87 5 0 2373  
2459 344507 344593 3e-28 134  
gi|33285929|gb|AY223844.1| scaffold738 92.22 797 61 1 1681  
2476 146227 145431 0.0 1129  
gi|33285929|gb|AY223844.1| scaffold738 87.97 773 71 16 1700  
2459 145433 146196 0.0 893  
gi|33285929|gb|AY223844.1| scaffold738 98.52 271 4 0 2764  
3034 254500 254770 3e-132 479  
gi|33285929|gb|AY223844.1| scaffold738 97.83 277 2 2 2764  
3036 141787 141511 4e-131 475  
gi|33285929|gb|AY223844.1| scaffold738 96.80 281 7 2 2758  
3036 61109 60829 7e-129 468  
gi|33285929|gb|AY223844.1| scaffold738 97.45 274 6 1 2761  
3033 143938 143665 2e-128 466  
gi|33285929|gb|AY223844.1| scaffold738 95.58 181 6 2 2758  
2936 46408 46588 6e-75 289  
gi|33285929|gb|AY223844.1| scaffold738 94.34 106 1 1 2928  
3033 46866 46966 2e-35 158  
gi|33285929|gb|AY223844.1| scaffold738 97.06 68 1 1 2751  
2818 194212 194278 4e-22 113  
gi|33285929|gb|AY223844.1| scaffold347 92.12 799 63 0 1681  
2479 340834 341632 0.0 1129  
gi|33285929|gb|AY223844.1| scaffold347 88.61 755 70 9 1713  
2459 341611 340865 0.0 905  
gi|33285929|gb|AY223844.1| scaffold347 93.07 361 25 0 2116  
2476 87266 86906 3e-147 529  
gi|33285929|gb|AY223844.1| scaffold347 98.58 281 4 0 2757  
3037 693903 694183 9e-138 497  
98  
gi|33285929|gb|AY223844.1| scaffold347 91.27 355 29 2 1704  
2056 86913 87267 2e-133 483

gi|33285929|gb|AY223844.1| scaffold347 96.88 288 4 5 2755  
3038 100138 99852 1e-131 477  
gi|33285929|gb|AY223844.1| scaffold347 96.55 290 7 3 2752  
3038 207604 207315 1e-131 477  
gi|33285929|gb|AY223844.1| scaffold347 92.92 325 23 0 1683  
2007 252621 252297 1e-130 473  
gi|33285929|gb|AY223844.1| scaffold347 96.19 289 6 4 2751  
3035 382804 382517 7e-129 468  
gi|33285929|gb|AY223844.1| scaffold347 92.52 294 22 0 2164  
2457 252297 252590 5e-115 422  
gi|33285929|gb|AY223844.1| scaffold347 95.74 258 6 5 2752  
3005 208388 208644 1e-111 411  
gi|33285929|gb|AY223844.1| scaffold347 97.57 206 5 0 2802  
3007 228050 227845 2e-94 353  
gi|33285929|gb|AY223844.1| scaffold347 93.60 203 13 0 1835  
2037 252047 252249 2e-79 303  
gi|33285929|gb|AY223844.1| scaffold347 91.63 203 17 0 2134  
2336 252249 252047 9e-73 281  
gi|33285929|gb|AY223844.1| scaffold347 93.24 148 9 1 2330  
2476 251905 251758 3e-53 217  
gi|33285929|gb|AY223844.1| scaffold347 91.43 140 10 2 1704  
1841 251765 251904 2e-45 191  
gi|33285929|gb|AY223844.1| scaffold347 95.60 91 4 0 1914  
2004 92347 92257 4e-32 147  
gi|33285929|gb|AY223844.1| scaffold347 93.41 91 6 0 2167  
2257 92257 92347 8e-29 135  
gi|33285929|gb|AY223844.1| scaffold347 98.67 75 0 1 2758  
2832 193977 194050 1e-27 132  
gi|33285929|gb|AY223844.1| scaffold347 87.01 77 5 2 2846  
2917 549099 549175 1e-12 82.4  
gi|33285929|gb|AY223844.1| scaffold67 92.34 796 56 4 1683 2476  
322832 323624 0.0 1129  
gi|33285929|gb|AY223844.1| scaffold67 88.62 756 67 13 1713 2459  
323606 322861 0.0 902  
gi|33285929|gb|AY223844.1| scaffold67 99.31 290 2 0 2751 3040  
381532 381243 4e-146 525  
gi|33285929|gb|AY223844.1| scaffold67 99.30 285 2 0 2753 3037  
647988 648272 2e-143 516  
gi|33285929|gb|AY223844.1| scaffold67 98.95 286 3 0 2751 3036  
168386 168671 3e-142 512  
gi|33285929|gb|AY223844.1| scaffold67 97.15 281 6 2 2754 3033  
413783 414062 1e-130 473  
gi|33285929|gb|AY223844.1| scaffold67 98.21 224 4 0 2787 3010  
314744 314521 4e-106 392  
gi|33285929|gb|AY223844.1| scaffold67 97.16 141 4 0 2761 2901  
641158 641018 6e-60 239

gi|33285929|gb|AY223844.1| scaffold67 97.14 140 4 0 2764 2903  
55201 55062 2e-59 237  
gi|33285929|gb|AY223844.1| scaffold67 94.81 135 5 2 2743 2877  
428740 428872 4e-51 209  
99  
gi|33285929|gb|AY223844.1| scaffold67 83.16 196 21 6 2751 2935  
347495 347301 8e-39 169  
gi|33285929|gb|AY223844.1| scaffold8662 92.21 796 61 1 1681  
2476 67252 66458 0.0 1127  
gi|33285929|gb|AY223844.1| scaffold8662 87.81 771 75 14 1700  
2459 66460 67222 0.0 887  
gi|33285929|gb|AY223844.1| scaffold8662 97.18 284 5 3 2755  
3035 13234 12951 1e-131 477  
gi|33285929|gb|AY223844.1| scaffold8662 88.21 229 15 5 2751  
2974 77952 77731 3e-67 263  
gi|33285929|gb|AY223844.1| scaffold5505 92.11 798 63 0 1683  
2480 85746 84949 0.0 1127  
gi|33285929|gb|AY223844.1| scaffold5505 87.76 768 81 11 1700  
2459 84955 85717 0.0 887  
gi|33285929|gb|AY223844.1| scaffold5505 94.08 304 9 8 2739  
3036 37324 37024 2e-124 453  
gi|33285929|gb|AY223844.1| scaffold3384 91.92 804 65 0 1673  
2476 94145 94948 0.0 1127  
gi|33285929|gb|AY223844.1| scaffold3384 88.36 773 67 17 1700  
2459 94946 94184 0.0 909  
gi|33285929|gb|AY223844.1| scaffold3384 97.55 286 6 1 2752  
3036 53539 53824 5e-135 488  
gi|33285929|gb|AY223844.1| scaffold3384 98.94 188 2 0 2764  
2951 61668 61855 2e-89 337  
gi|33285929|gb|AY223844.1| scaffold3384 85.56 180 26 0 2823  
3002 165327 165148 6e-45 189  
gi|33285929|gb|AY223844.1| scaffold3384 89.26 149 16 0 2763  
2911 176609 176757 2e-44 187  
gi|33285929|gb|AY223844.1| scaffold3384 90.48 84 8 0 2396  
2479 138621 138704 1e-21 111  
gi|33285929|gb|AY223844.1| scaffold3384 88.61 79 6 3 1700  
1775 138699 138621 5e-16 93.5  
gi|33285929|gb|AY223844.1| scaffold3384 100.00 33 0 0  
3174 3206 122493 122461 1e-06 62.1  
gi|33285929|gb|AY223844.1| scaffold2471 91.66 815 65 3 1665  
2477 12966 13779 0.0 1127  
gi|33285929|gb|AY223844.1| scaffold2471 87.23 775 84 12 1692  
2457 13784 13016 0.0 870  
gi|33285929|gb|AY223844.1| scaffold2471 98.31 118 1 1 2922  
3038 147125 147008 6e-50 206  
gi|33285929|gb|AY223844.1| scaffold1659 92.01 801 64 0 1676

2476 130332 129532 0.0 1127  
gi|33285929|gb|AY223844.1| scaffold1659 87.78 769 73 15 1700  
2456 129534 130293 0.0 881  
gi|33285929|gb|AY223844.1| scaffold1659 96.90 290 7 2 2748  
3036 182927 183215 7e-134 484  
gi|33285929|gb|AY223844.1| scaffold1659 95.68 278 8 2 2753  
3030 277343 277616 1e-121 444  
gi|33285929|gb|AY223844.1| scaffold1659 92.59 108 8 0 1683  
1790 131094 130987 6e-35 156  
gi|33285929|gb|AY223844.1| scaffold1659 84.96 133 17 3 1  
132 165228 165098 1e-27 132  
100  
gi|33285929|gb|AY223844.1| scaffold1659 96.05 76 3 0 2381  
2456 130987 131062 2e-25 124  
gi|33285929|gb|AY223844.1| scaffold672 91.94 806 62 2 1676  
2481 258779 257977 0.0 1127  
gi|33285929|gb|AY223844.1| scaffold672 88.23 773 65 18 1700  
2459 257984 258743 0.0 900  
gi|33285929|gb|AY223844.1| scaffold672 91.87 603 48 1 1857  
2459 48886 48285 0.0 843  
gi|33285929|gb|AY223844.1| scaffold672 87.40 643 62 13 1683  
2316 48256 48888 0.0 721  
gi|33285929|gb|AY223844.1| scaffold672 98.86 264 3 0 2764  
3027 145646 145383 5e-130 472  
gi|33285929|gb|AY223844.1| scaffold672 92.39 289 7 7 2758  
3036 42375 42092 9e-108 398  
gi|33285929|gb|AY223844.1| scaffold672 99.47 190 1 0 2847  
3036 378456 378645 3e-92 346  
gi|33285929|gb|AY223844.1| scaffold672 97.89 190 4 0 2764  
2953 378267 378456 3e-87 329  
gi|33285929|gb|AY223844.1| scaffold672 97.37 190 2 2 2848  
3036 164363 164176 2e-84 320  
gi|33285929|gb|AY223844.1| scaffold672 90.91 198 5 6 2753  
2945 164552 164363 2e-64 254  
gi|33285929|gb|AY223844.1| scaffold672 96.73 153 3 2 2752  
2902 166387 166539 2e-64 254  
gi|33285929|gb|AY223844.1| scaffold656 92.11 798 63 0 1683  
2480 404147 403350 0.0 1127  
gi|33285929|gb|AY223844.1| scaffold656 91.18 794 70 0 1683  
2476 120098 120891 0.0 1081  
gi|33285929|gb|AY223844.1| scaffold656 89.47 798 74 5 1683  
2479 277891 278679 0.0 1002  
gi|33285929|gb|AY223844.1| scaffold656 87.45 773 74 16 1700  
2459 403356 404118 0.0 869  
gi|33285929|gb|AY223844.1| scaffold656 87.32 773 75 17 1700  
2459 120889 120127 0.0 863

gi|33285929|gb|AY223844.1| scaffold656 86.29 773 75 21 1700  
2459 278674 277920 0.0 811  
gi|33285929|gb|AY223844.1| scaffold656 97.57 288 6 1 2750  
3036 402097 402384 4e-136 492  
gi|33285929|gb|AY223844.1| scaffold656 97.63 253 3 3 2755  
3004 73123 73375 9e-118 431  
gi|33285929|gb|AY223844.1| scaffold656 95.54 157 5 2 2758  
2912 212189 212033 3e-63 250  
gi|33285929|gb|AY223844.1| scaffold656 95.76 118 5 0 2918  
3035 237911 237794 2e-45 191  
gi|33285929|gb|AY223844.1| scaffold656 100.00 96 0 0  
2786 2881 188589 188494 1e-41 178  
gi|33285929|gb|AY223844.1| scaffold656 100.00 92 0 0  
2941 3032 212009 211918 2e-39 171  
gi|33285929|gb|AY223844.1| scaffold493 92.21 796 61 1 1681  
2476 336672 335878 0.0 1127  
gi|33285929|gb|AY223844.1| scaffold493 89.01 755 63 14 1713  
2457 335896 336640 0.0 918  
101  
gi|33285929|gb|AY223844.1| scaffold493 97.95 293 2 3 2748  
3036 92703 92411 5e-140 505  
gi|33285929|gb|AY223844.1| scaffold493 98.60 285 4 0 2751  
3035 117303 117019 5e-140 505  
gi|33285929|gb|AY223844.1| scaffold493 97.89 284 3 3 2755  
3035 171036 171319 5e-135 488  
gi|33285929|gb|AY223844.1| scaffold493 98.17 273 5 0 2764  
3036 71423 71151 1e-131 477  
gi|33285929|gb|AY223844.1| scaffold493 97.15 281 8 0 2756  
3036 156435 156715 4e-131 475  
gi|33285929|gb|AY223844.1| scaffold493 96.97 264 8 0 2773  
3036 432776 432513 1e-121 444  
gi|33285929|gb|AY223844.1| scaffold493 97.19 249 6 1 2755  
3002 227395 227147 2e-114 420  
gi|33285929|gb|AY223844.1| scaffold219 92.11 798 63 0 1683  
2480 67997 67200 0.0 1127  
gi|33285929|gb|AY223844.1| scaffold219 91.83 796 61 3 1683  
2476 50657 49864 0.0 1109  
gi|33285929|gb|AY223844.1| scaffold219 91.39 801 57 5 1683  
2476 250469 251264 0.0 1088  
gi|33285929|gb|AY223844.1| scaffold219 88.20 771 72 14 1700  
2459 67206 67968 0.0 904  
gi|33285929|gb|AY223844.1| scaffold219 88.16 777 63 20 1700  
2459 251262 250498 0.0 898  
gi|33285929|gb|AY223844.1| scaffold219 87.34 758 74 17 1713  
2459 49882 50628 0.0 848  
gi|33285929|gb|AY223844.1| scaffold219 98.92 279 2 1 2764

3041 530704 530426 9e-138 497  
gi|33285929|gb|AY223844.1| scaffold219 98.24 284 3 1 2755  
3036 421861 421578 3e-137 496  
gi|33285929|gb|AY223844.1| scaffold219 97.89 284 3 3 2755  
3035 466647 466364 5e-135 488  
gi|33285929|gb|AY223844.1| scaffold219 97.46 276 6 1 2760  
3034 283771 284046 2e-129 470  
gi|33285929|gb|AY223844.1| scaffold219 96.84 253 6 2 2758  
3008 518738 518486 5e-115 422  
gi|33285929|gb|AY223844.1| scaffold219 96.06 254 6 4 2748  
2999 81836 82087 1e-111 411  
gi|33285929|gb|AY223844.1| scaffold219 91.12 169 14 1 2833  
3001 405488 405321 1e-56 228  
gi|33285929|gb|AY223844.1| scaffold8566 92.21 796 59 3 1683  
2476 39385 40179 0.0 1125  
gi|33285929|gb|AY223844.1| scaffold8566 87.44 772 76 14 1700  
2459 40177 39415 0.0 870  
gi|33285929|gb|AY223844.1| scaffold8566 98.60 286 4 0 2751  
3036 68531 68816 1e-140 507  
gi|33285929|gb|AY223844.1| scaffold8566 98.24 284 2 3 2755  
3035 69344 69627 1e-136 494  
gi|33285929|gb|AY223844.1| scaffold5313 91.81 806 66 0 1678  
2483 51608 52413 0.0 1125  
gi|33285929|gb|AY223844.1| scaffold5313 87.42 771 78 13 1700  
2459 52404 51642 0.0 870  
102  
gi|33285929|gb|AY223844.1| scaffold5313 98.57 279 4 0 2758  
3036 44355 44077 1e-136 494  
gi|33285929|gb|AY223844.1| scaffold5313 97.56 287 5 2 2750  
3035 110823 111108 1e-135 490  
gi|33285929|gb|AY223844.1| scaffold5174 92.19 794 62 0 1683  
2476 31585 30792 0.0 1125  
gi|33285929|gb|AY223844.1| scaffold5174 87.56 772 75 15 1700  
2459 30794 31556 0.0 876  
gi|33285929|gb|AY223844.1| scaffold5174 95.80 286 5 2 2751  
3036 7874 7596 5e-125 455  
gi|33285929|gb|AY223844.1| scaffold5174 85.96 57 7 1 2932  
2987 84082 84138 5e-06 60.2  
gi|33285929|gb|AY223844.1| scaffold4591 92.19 794 62 0 1683  
2476 99869 99076 0.0 1125  
gi|33285929|gb|AY223844.1| scaffold4591 88.36 773 67 17 1700  
2459 99078 99840 0.0 907  
gi|33285929|gb|AY223844.1| scaffold4591 96.17 313 3 7 2740  
3045 138794 139104 2e-139 503  
gi|33285929|gb|AY223844.1| scaffold4591 99.49 195 1 0 2839  
3033 38305 38499 5e-95 355

gi|33285929|gb|AY223844.1| scaffold2432 92.32 794 56 4 1683  
2476 223342 222554 0.0 1125  
gi|33285929|gb|AY223844.1| scaffold2432 88.21 772 65 19 1700  
2459 222556 223313 0.0 900  
gi|33285929|gb|AY223844.1| scaffold2432 98.94 282 3 0 2755  
3036 83381 83100 5e-140 505  
gi|33285929|gb|AY223844.1| scaffold2432 98.26 287 4 1 2749  
3034 4373 4659 7e-139 501  
gi|33285929|gb|AY223844.1| scaffold2432 97.86 280 4 2 2758  
3035 137187 136908 2e-133 483  
gi|33285929|gb|AY223844.1| scaffold2432 98.54 274 3 1 2764  
3036 176893 176620 2e-133 483  
gi|33285929|gb|AY223844.1| scaffold2432 93.50 323 21 0 1676  
1998 82100 81778 9e-133 481  
gi|33285929|gb|AY223844.1| scaffold2432 95.83 288 8 4 2752  
3035 53534 53247 3e-127 462  
gi|33285929|gb|AY223844.1| scaffold2432 97.06 272 8 0 2765  
3036 207678 207949 4e-126 459  
gi|33285929|gb|AY223844.1| scaffold2432 92.01 288 21 2 2173  
2459 81778 82064 2e-109 403  
gi|33285929|gb|AY223844.1| scaffold2432 93.42 152 10 0 2332  
2483 71541 71390 4e-56 226  
gi|33285929|gb|AY223844.1| scaffold2432 91.55 142 9 3 1700  
1838 71399 71540 5e-46 193  
gi|33285929|gb|AY223844.1| scaffold2432 100.00 36 0 0  
3171 3206 7890 7925 3e-08 67.6  
gi|33285929|gb|AY223844.1| scaffold2025 92.21 796 58 3 1683  
2476 29618 30411 0.0 1125  
gi|33285929|gb|AY223844.1| scaffold2025 87.58 757 74 15 1713  
2459 30393 29647 0.0 859  
gi|33285929|gb|AY223844.1| scaffold2025 86.12 209 27 2 2795  
3001 196358 196566 2e-55 224  
103  
gi|33285929|gb|AY223844.1| scaffold2025 85.62 153 19 2 2866  
3015 177493 177645 2e-35 158  
gi|33285929|gb|AY223844.1| scaffold1826 92.20 795 60 2 1683  
2476 113798 113005 0.0 1125  
gi|33285929|gb|AY223844.1| scaffold1826 88.50 774 64 19 1700  
2459 113007 113769 0.0 913  
gi|33285929|gb|AY223844.1| scaffold1826 100.00 281 0 0  
2753 3033 182739 182459 2e-144 520  
gi|33285929|gb|AY223844.1| scaffold1826 98.53 273 4 0 2764  
3036 190549 190821 2e-133 483  
gi|33285929|gb|AY223844.1| scaffold1826 96.53 288 7 3 2755  
3039 229690 229977 1e-130 473  
gi|33285929|gb|AY223844.1| scaffold1826 95.71 70 3 0 2760



2829 70790 70859 4e-22 113  
gi|33285929|gb|AY223844.1| scaffold1531 92.19 794 62 0 1683  
2476 137992 137199 0.0 1125  
gi|33285929|gb|AY223844.1| scaffold1531 88.20 771 72 14 1700  
2459 137201 137963 0.0 904  
gi|33285929|gb|AY223844.1| scaffold1531 98.90 273 3 0 2764  
3036 3162 2890 5e-135 488  
gi|33285929|gb|AY223844.1| scaffold1531 98.54 206 3 0 2752  
2957 114461 114666 9e-98 364  
gi|33285929|gb|AY223844.1| scaffold1531 92.89 253 2 4 2758  
3010 39637 39873 2e-94 353  
gi|33285929|gb|AY223844.1| scaffold1531 82.24 259 27 8 2751  
3005 69423 69666 6e-50 206  
gi|33285929|gb|AY223844.1| scaffold1531 99.04 104 1 0 2932  
3035 40173 40276 2e-44 187  
gi|33285929|gb|AY223844.1| scaffold1531 89.55 134 13 1 2858  
2990 10549 10682 8e-39 169  
gi|33285929|gb|AY223844.1| scaffold1069 92.19 794 62 0 1683  
2476 2440 3233 0.0 1125  
gi|33285929|gb|AY223844.1| scaffold1069 87.60 774 71 19 1700  
2459 3231 2469 0.0 874  
gi|33285929|gb|AY223844.1| scaffold1069 98.95 285 3 0 2751  
3035 235285 235001 1e-141 510  
gi|33285929|gb|AY223844.1| scaffold1069 97.89 285 3 3 2755  
3036 159853 159569 1e-135 490  
gi|33285929|gb|AY223844.1| scaffold1069 97.53 283 6 1 2755  
3036 270334 270616 2e-133 483  
gi|33285929|gb|AY223844.1| scaffold1069 96.76 278 7 2 2758  
3033 179415 179692 3e-127 462  
gi|33285929|gb|AY223844.1| scaffold812 92.20 795 60 2 1683  
2476 112457 111664 0.0 1125  
gi|33285929|gb|AY223844.1| scaffold812 89.23 771 64 14 1700  
2459 111666 112428 0.0 948  
gi|33285929|gb|AY223844.1| scaffold812 92.96 398 28 0 2079  
2476 209753 210150 8e-163 580  
gi|33285929|gb|AY223844.1| scaffold812 91.36 359 28 3 1700  
2055 210148 209790 5e-135 488  
gi|33285929|gb|AY223844.1| scaffold812 97.95 244 4 1 2761  
3003 110101 109858 5e-115 422  
104  
gi|33285929|gb|AY223844.1| scaffold812 91.07 291 15 4 2751  
3036 250985 250701 2e-103 383  
gi|33285929|gb|AY223844.1| scaffold812 97.95 195 3 1 2758  
2951 321955 322149 2e-89 337  
gi|33285929|gb|AY223844.1| scaffold812 93.53 170 11 0 1683  
1852 209438 209607 2e-64 254

gi|33285929|gb|AY223844.1| scaffold812 95.74 141 6 0 2319  
2459 209607 209467 1e-56 228  
gi|33285929|gb|AY223844.1| scaffold812 81.10 254 42 6 2751  
3001 165955 166205 1e-47 198  
gi|33285929|gb|AY223844.1| scaffold812 80.80 250 42 6 2755  
3001 173236 172990 2e-45 191  
gi|33285929|gb|AY223844.1| scaffold812 100.00 92 0 0  
2942 3033 367789 367880 2e-39 171  
gi|33285929|gb|AY223844.1| scaffold767 92.19 794 62 0 1683  
2476 18767 17974 0.0 1125  
gi|33285929|gb|AY223844.1| scaffold767 90.85 798 70 3 1681  
2478 115097 115891 0.0 1068  
gi|33285929|gb|AY223844.1| scaffold767 87.81 755 75 12 1714  
2459 17992 18738 0.0 870  
gi|33285929|gb|AY223844.1| scaffold767 87.42 771 75 17 1700  
2459 115887 115128 0.0 867  
gi|33285929|gb|AY223844.1| scaffold767 98.58 281 4 0 2756  
3036 71790 72070 9e-138 497  
gi|33285929|gb|AY223844.1| scaffold767 97.58 289 4 1 2751  
3036 365587 365875 4e-136 492  
gi|33285929|gb|AY223844.1| scaffold767 98.53 273 4 0 2764  
3036 207107 206835 2e-133 483  
gi|33285929|gb|AY223844.1| scaffold767 96.52 287 6 4 2752  
3034 355143 355429 5e-130 472  
gi|33285929|gb|AY223844.1| scaffold767 96.47 283 10 0 2751  
3033 359340 359058 7e-129 468  
gi|33285929|gb|AY223844.1| scaffold767 85.10 208 26 3 2752  
2958 318337 318134 2e-50 207  
gi|33285929|gb|AY223844.1| scaffold767 82.93 123 20 1 2821  
2942 76681 76559 5e-21 110  
gi|33285929|gb|AY223844.1| scaffold767 100.00 33 0 0  
3174 3206 238940 238908 1e-06 62.1  
gi|33285929|gb|AY223844.1| scaffold741 92.19 794 62 0 1683  
2476 114020 113227 0.0 1125  
gi|33285929|gb|AY223844.1| scaffold741 88.73 754 71 9 1713  
2459 113245 113991 0.0 911  
gi|33285929|gb|AY223844.1| scaffold741 97.86 281 4 2 2758  
3036 342350 342070 7e-134 484  
gi|33285929|gb|AY223844.1| scaffold741 97.09 172 3 2 2761  
2930 3792 3621 6e-75 289  
gi|33285929|gb|AY223844.1| scaffold741 96.67 120 3 1 2758  
2877 65753 65871 1e-47 198  
gi|33285929|gb|AY223844.1| scaffold741 98.95 95 1 0 2941  
3035 65941 66035 2e-39 171  
gi|33285929|gb|AY223844.1| scaffold96 92.12 799 60 3 1683 2479  
579591 578794 0.0 1125

gi|33285929|gb|AY223844.1| scaffold96 91.52 778 66 0 1699 2476  
340372 341149 0.0 1074  
gi|33285929|gb|AY223844.1| scaffold96 90.82 752 55 7 1675 2424  
299727 298988 0.0 996  
gi|33285929|gb|AY223844.1| scaffold96 88.49 782 64 21 1693 2459  
578792 579562 0.0 922  
gi|33285929|gb|AY223844.1| scaffold96 88.79 758 62 17 1714 2459  
341131 340385 0.0 907  
gi|33285929|gb|AY223844.1| scaffold96 87.97 715 72 10 1747 2459  
298988 299690 0.0 833  
gi|33285929|gb|AY223844.1| scaffold96 91.84 441 36 0 1681 2121  
514766 514326 6e-174 617  
gi|33285929|gb|AY223844.1| scaffold96 91.49 435 37 0 2042 2476  
259700 260134 6e-169 601  
gi|33285929|gb|AY223844.1| scaffold96 89.63 434 40 5 2046 2476  
539082 538651 2e-153 549  
gi|33285929|gb|AY223844.1| scaffold96 99.31 288 2 0 2750 3037  
364418 364131 5e-145 521  
gi|33285929|gb|AY223844.1| scaffold96 90.27 401 34 5 2003 2400  
540491 540093 5e-145 521  
gi|33285929|gb|AY223844.1| scaffold96 98.26 287 2 3 2752 3036  
581436 581151 2e-138 499  
gi|33285929|gb|AY223844.1| scaffold96 96.38 304 8 3 2745 3045  
611695 611392 9e-138 497  
gi|33285929|gb|AY223844.1| scaffold96 91.11 360 28 4 1700 2055  
538653 539012 7e-134 484  
gi|33285929|gb|AY223844.1| scaffold96 91.86 344 28 0 2116 2459  
514392 514735 9e-133 481  
gi|33285929|gb|AY223844.1| scaffold96 89.97 359 33 3 1700 2055  
260132 259774 1e-126 460  
gi|33285929|gb|AY223844.1| scaffold96 96.01 276 10 1 2754 3029  
622497 622771 9e-123 448  
gi|33285929|gb|AY223844.1| scaffold96 86.31 409 35 15 1771 2168  
540093 540491 4e-116 425  
gi|33285929|gb|AY223844.1| scaffold96 92.07 290 23 0 1673 1962  
540780 540491 4e-111 409  
gi|33285929|gb|AY223844.1| scaffold96 90.36 249 24 0 2211 2459  
540493 540741 1e-86 327  
gi|33285929|gb|AY223844.1| scaffold96 92.66 218 16 0 1683 1900  
389911 390128 9e-83 315  
gi|33285929|gb|AY223844.1| scaffold96 91.89 222 18 0 2255 2476  
390435 390656 1e-81 311  
gi|33285929|gb|AY223844.1| scaffold96 94.62 186 10 0 2294 2479  
394744 394559 6e-75 289  
gi|33285929|gb|AY223844.1| scaffold96 90.45 220 18 3 1700 1916

390654 390435 2e-74 287  
gi|33285929|gb|AY223844.1| scaffold96 92.59 189 14 0 2271 2459  
390128 389940 6e-70 272  
gi|33285929|gb|AY223844.1| scaffold96 94.97 159 7 1 2761 2918  
72758 72600 9e-63 248  
gi|33285929|gb|AY223844.1| scaffold96 91.16 181 13 3 1700 1877  
394564 394744 4e-61 243  
106  
gi|33285929|gb|AY223844.1| scaffold96 98.44 128 2 0 2910 3037  
70837 70710 4e-56 226  
gi|33285929|gb|AY223844.1| scaffold96 93.96 149 9 0 1894 2042  
395070 394922 4e-56 226  
gi|33285929|gb|AY223844.1| scaffold96 92.81 153 11 0 1683 1835  
396117 395965 6e-55 222  
gi|33285929|gb|AY223844.1| scaffold96 93.29 149 10 0 2129 2277  
394922 395070 2e-54 220  
gi|33285929|gb|AY223844.1| scaffold96 87.79 172 21 0 2834 3005  
30229 30058 7e-49 202  
gi|33285929|gb|AY223844.1| scaffold96 95.97 124 5 0 2336 2459  
395965 396088 7e-49 202  
gi|33285929|gb|AY223844.1| scaffold96 91.47 129 7 4 2751 2876  
25662 25789 2e-40 174  
gi|33285929|gb|AY223844.1| scaffold9948 92.09 796 63 0 1681  
2476 48546 47751 0.0 1123  
gi|33285929|gb|AY223844.1| scaffold9948 89.00 773 62 18 1700  
2459 47753 48515 0.0 935  
gi|33285929|gb|AY223844.1| scaffold9948 98.17 273 5 0 2764  
3036 61814 61542 1e-131 477  
gi|33285929|gb|AY223844.1| scaffold9948 88.14 312 8 12 2736  
3040 53264 52975 1e-91 344  
gi|33285929|gb|AY223844.1| scaffold7232 92.11 798 59 4 1681  
2476 39252 40047 0.0 1123  
gi|33285929|gb|AY223844.1| scaffold7232 87.86 774 69 19 1700  
2459 40045 39283 0.0 885  
gi|33285929|gb|AY223844.1| scaffold7232 96.42 307 6 4 2744  
3046 9862 9557 7e-139 501  
gi|33285929|gb|AY223844.1| scaffold7232 95.72 304 3 6 2748  
3048 25344 25640 9e-133 481  
gi|33285929|gb|AY223844.1| scaffold5839 92.19 794 61 1 1684  
2476 28585 27792 0.0 1123  
gi|33285929|gb|AY223844.1| scaffold5839 89.27 764 62 15 1704  
2456 27799 28553 0.0 941  
gi|33285929|gb|AY223844.1| scaffold5839 98.23 283 3 2 2755  
3036 21898 22179 1e-136 494  
gi|33285929|gb|AY223844.1| scaffold5839 98.21 279 3 2 2758  
3034 91740 92018 2e-134 486

gi|33285929|gb|AY223844.1| scaffold4916 92.09 796 63 0 1683  
2478 123133 123928 0.0 1123  
gi|33285929|gb|AY223844.1| scaffold4916 88.24 757 68 15 1714  
2459 123908 123162 0.0 885  
gi|33285929|gb|AY223844.1| scaffold4916 98.19 277 4 1 2761  
3036 20612 20888 2e-133 483  
gi|33285929|gb|AY223844.1| scaffold4916 94.33 282 13 3 2755  
3033 70440 70159 3e-117 429  
gi|33285929|gb|AY223844.1| scaffold3907 92.21 796 59 3 1682  
2476 55060 54267 0.0 1123  
gi|33285929|gb|AY223844.1| scaffold3907 87.97 773 69 18 1700  
2459 54269 55030 0.0 893  
gi|33285929|gb|AY223844.1| scaffold3907 98.60 285 4 0 2751  
3035 81867 82151 5e-140 505  
107  
gi|33285929|gb|AY223844.1| scaffold3907 98.59 284 4 0 2751  
3034 51918 51635 2e-139 503  
gi|33285929|gb|AY223844.1| scaffold3907 97.90 286 5 1 2752  
3036 14485 14770 1e-136 494  
gi|33285929|gb|AY223844.1| scaffold3391 91.71 808 67 0 1673  
2480 16831 16024 0.0 1123  
gi|33285929|gb|AY223844.1| scaffold3391 89.34 769 61 16 1700  
2456 16030 16789 0.0 948  
gi|33285929|gb|AY223844.1| scaffold3391 97.50 280 4 3 2758  
3034 123048 122769 4e-131 475  
gi|33285929|gb|AY223844.1| scaffold3391 96.47 283 10 0 2751  
3033 98022 97740 7e-129 468  
gi|33285929|gb|AY223844.1| scaffold2428 92.18 793 62 0 1685  
2477 2450 3242 0.0 1123  
gi|33285929|gb|AY223844.1| scaffold2428 92.07 744 59 0 1713  
2456 12991 13734 0.0 1050  
gi|33285929|gb|AY223844.1| scaffold2428 88.54 803 74 13 1683  
2476 13766 12973 0.0 957  
gi|33285929|gb|AY223844.1| scaffold2428 87.44 780 75 17 1693  
2459 3246 2477 0.0 876  
gi|33285929|gb|AY223844.1| scaffold2428 91.42 478 41 0 2003  
2480 193921 194398 0.0 658  
gi|33285929|gb|AY223844.1| scaffold2428 84.65 482 51 19 1700  
2168 194392 193921 4e-126 459  
gi|33285929|gb|AY223844.1| scaffold1341 92.20 795 58 4 1683  
2476 265290 266081 0.0 1123  
gi|33285929|gb|AY223844.1| scaffold1341 87.98 774 66 21 1700  
2459 266079 265319 0.0 889  
gi|33285929|gb|AY223844.1| scaffold1341 90.24 666 50 5 1793  
2458 289157 288507 0.0 857  
gi|33285929|gb|AY223844.1| scaffold1341 87.43 668 65 15 1713

2378 288507 289157 0.0 750  
gi|33285929|gb|AY223844.1| scaffold1341 97.58 289 2 5 2752  
3035 191507 191795 1e-135 490  
gi|33285929|gb|AY223844.1| scaffold1341 98.33 120 2 0 2917  
3036 135322 135203 1e-51 211  
gi|33285929|gb|AY223844.1| scaffold1341 83.58 134 22 0 2904  
3037 103240 103373 5e-26 126  
gi|33285929|gb|AY223844.1| scaffold1341 85.59 111 5 3 1683  
1793 289509 289410 6e-20 106  
gi|33285929|gb|AY223844.1| scaffold1341 85.37 82 1 5 2378  
2459 289410 289480 2e-10 75.0  
gi|33285929|gb|AY223844.1| scaffold736 92.10 797 62 1 1681  
2476 181272 180476 0.0 1123  
gi|33285929|gb|AY223844.1| scaffold736 90.36 747 72 0 1713  
2459 172847 173593 0.0 983  
gi|33285929|gb|AY223844.1| scaffold736 88.15 810 76 15 1681  
2480 173624 172825 0.0 946  
gi|33285929|gb|AY223844.1| scaffold736 88.24 774 67 19 1700  
2459 180478 181241 0.0 905  
gi|33285929|gb|AY223844.1| scaffold736 92.76 456 33 0 2021  
2476 369928 370383 0.0 662  
108  
gi|33285929|gb|AY223844.1| scaffold736 98.94 282 0 3 2758  
3036 199920 200201 7e-139 501  
gi|33285929|gb|AY223844.1| scaffold736 98.25 285 4 1 2754  
3038 283564 283281 9e-138 497  
gi|33285929|gb|AY223844.1| scaffold736 96.89 289 5 4 2752  
3036 331123 331411 9e-133 481  
gi|33285929|gb|AY223844.1| scaffold736 85.78 464 43 17 1700  
2150 370381 369928 2e-129 470  
gi|33285929|gb|AY223844.1| scaffold736 99.03 207 2 0 2830  
3036 296290 296496 5e-100 372  
gi|33285929|gb|AY223844.1| scaffold736 94.92 197 6 3 2758  
2952 124481 124675 6e-80 305  
gi|33285929|gb|AY223844.1| scaffold736 97.35 113 2 1 2930  
3041 124899 125011 2e-45 191  
gi|33285929|gb|AY223844.1| scaffold424\_2 91.93 805 60 2 1681  
2480 263580 262776 0.0 1123  
gi|33285929|gb|AY223844.1| scaffold424\_2 88.52 775 67 18 1700  
2459 262782 263549 0.0 918  
gi|33285929|gb|AY223844.1| scaffold424\_2 100.00 272 0 0  
2764 3035 238584 238313 2e-139 503  
gi|33285929|gb|AY223844.1| scaffold424\_2 97.20 286 6 2 2752  
3035 111266 111551 2e-133 483  
gi|33285929|gb|AY223844.1| scaffold424\_2 97.86 280 5 1 2755  
3033 208469 208748 2e-133 483

gi|33285929|gb|AY223844.1| scaffold424\_2 96.64 268 6 3 2746  
3011 233032 232766 4e-121 442  
gi|33285929|gb|AY223844.1| scaffold424\_2 92.86 280 5 5 2758  
3035 17730 17464 4e-106 392  
gi|33285929|gb|AY223844.1| scaffold424\_2 97.80 182 3 1 2764  
2945 120635 120455 3e-82 313  
gi|33285929|gb|AY223844.1| scaffold424\_2 95.86 169 5 2 2757  
2923 38298 38466 6e-70 272  
gi|33285929|gb|AY223844.1| scaffold424\_2 96.67 120 3 1 2920  
3038 232765 232646 1e-47 198  
gi|33285929|gb|AY223844.1| scaffold424\_2 100.00 84 0 0  
2954 3037 38467 38550 6e-35 156  
gi|33285929|gb|AY223844.1| scaffold152 92.19 794 61 1 1683  
2476 230627 231419 0.0 1123  
gi|33285929|gb|AY223844.1| scaffold152 90.65 802 64 9 1681  
2476 416409 417205 0.0 1057  
gi|33285929|gb|AY223844.1| scaffold152 88.21 772 69 17 1700  
2459 231417 230656 0.0 902  
gi|33285929|gb|AY223844.1| scaffold152 87.93 754 70 15 1717  
2459 417183 416440 0.0 869  
gi|33285929|gb|AY223844.1| scaffold152 92.04 553 38 2 1935  
2481 587090 587642 0.0 774  
gi|33285929|gb|AY223844.1| scaffold152 93.06 432 30 0 1675  
2106 585562 585993 6e-179 634  
gi|33285929|gb|AY223844.1| scaffold152 86.03 551 58 13 1700  
2236 587635 587090 4e-161 575  
gi|33285929|gb|AY223844.1| scaffold152 99.27 274 1 1 2764  
3036 310939 311212 1e-136 494  
109  
gi|33285929|gb|AY223844.1| scaffold152 98.53 272 4 0 2764  
3035 467835 467564 9e-133 481  
gi|33285929|gb|AY223844.1| scaffold152 97.46 276 5 2 2761  
3034 41330 41605 2e-129 470  
gi|33285929|gb|AY223844.1| scaffold152 90.70 344 32 0 2116  
2459 585942 585599 4e-126 459  
gi|33285929|gb|AY223844.1| scaffold152 98.09 262 5 0 2774  
3035 409490 409751 1e-125 457  
gi|33285929|gb|AY223844.1| scaffold152 95.44 285 7 1 2751  
3035 18059 18337 2e-123 449  
gi|33285929|gb|AY223844.1| scaffold152 96.28 269 1 2 2764  
3032 402646 402387 2e-118 433  
gi|33285929|gb|AY223844.1| scaffold152 94.78 268 9 5 2755  
3019 179762 179497 3e-112 412  
gi|33285929|gb|AY223844.1| scaffold152 95.65 207 7 2 2744  
2948 536637 536431 9e-88 331  
gi|33285929|gb|AY223844.1| scaffold152 100.00 131 0 0

2764 2894 20472 20602 4e-61 243  
gi|33285929|gb|AY223844.1| scaffold152 100.00 74 0 0  
2906 2979 174683 174610 2e-29 137  
gi|33285929|gb|AY223844.1| scaffold152 98.36 61 1 0 2975  
3035 20607 20667 2e-20 108  
gi|33285929|gb|AY223844.1| scaffold102 92.10 797 62 1 1683  
2479 108479 107684 0.0 1123  
gi|33285929|gb|AY223844.1| scaffold102 91.38 800 63 2 1683  
2476 263079 262280 0.0 1092  
gi|33285929|gb|AY223844.1| scaffold102 87.68 771 75 14 1700  
2459 107689 108450 0.0 880  
gi|33285929|gb|AY223844.1| scaffold102 86.76 778 76 18 1700  
2459 262282 263050 0.0 841  
gi|33285929|gb|AY223844.1| scaffold102 99.27 273 2 0 2764  
3036 416583 416855 1e-136 494  
gi|33285929|gb|AY223844.1| scaffold102 99.26 272 2 0 2764  
3035 225146 224875 4e-136 492  
gi|33285929|gb|AY223844.1| scaffold102 98.90 273 3 0 2764  
3036 257192 256920 5e-135 488  
gi|33285929|gb|AY223844.1| scaffold102 96.39 277 8 2 2758  
3032 227652 227928 5e-125 455  
gi|33285929|gb|AY223844.1| scaffold102 96.34 273 5 3 2767  
3034 56363 56635 1e-121 444  
gi|33285929|gb|AY223844.1| scaffold102 93.33 285 9 6 2758  
3040 250494 250218 3e-112 412  
gi|33285929|gb|AY223844.1| scaffold102 95.65 253 7 1 2758  
3010 529722 529474 2e-109 403  
gi|33285929|gb|AY223844.1| scaffold10812 92.66 777 57 0 1683  
2459 30376 31152 0.0 1122  
gi|33285929|gb|AY223844.1| scaffold10812 88.21 780 72 14 1690  
2459 31174 30405 0.0 913  
gi|33285929|gb|AY223844.1| scaffold10812 92.31 273 2 7 2761  
3032 49874 50128 2e-99 370  
gi|33285929|gb|AY223844.1| scaffold2694 91.71 808 65 2 1676  
2481 130177 129370 0.0 1122  
110  
gi|33285929|gb|AY223844.1| scaffold2694 87.82 772 74 14 1700  
2459 129377 130140 0.0 889  
gi|33285929|gb|AY223844.1| scaffold2694 97.23 289 5 3 2752  
3037 2627 2915 2e-134 486  
gi|33285929|gb|AY223844.1| scaffold2694 96.47 283 7 3 2752  
3031 23563 23845 9e-128 464  
gi|33285929|gb|AY223844.1| scaffold2694 97.33 225 6 0 2751  
2975 148944 149168 2e-103 383  
gi|33285929|gb|AY223844.1| scaffold1503 91.72 809 64 3 1675  
2483 285235 284430 0.0 1122



gi|33285929|gb|AY223844.1| scaffold1503 88.67 768 67 19 1700  
2457 284439 285196 0.0 920  
gi|33285929|gb|AY223844.1| scaffold1503 92.76 290 20 1 1683  
1971 45679 45390 7e-114 418  
gi|33285929|gb|AY223844.1| scaffold1503 92.64 258 19 0 2202  
2459 45393 45650 5e-100 372  
gi|33285929|gb|AY223844.1| scaffold1503 87.75 253 21 5 2753  
3004 207052 206809 2e-74 287  
gi|33285929|gb|AY223844.1| scaffold1503 84.39 205 29 3 2787  
2988 185879 186083 1e-47 198  
gi|33285929|gb|AY223844.1| scaffold1503 94.23 104 6 0 2062  
2165 44409 44512 5e-36 159  
gi|33285929|gb|AY223844.1| scaffold1198\_2 92.08 795 63 0 1683  
2477 68406 67612 0.0 1122  
gi|33285929|gb|AY223844.1| scaffold1198\_2 89.12 772 63 15 1700  
2459 67615 68377 0.0 942  
gi|33285929|gb|AY223844.1| scaffold1198\_2 99.63 267 1 0 2764  
3030 96424 96158 5e-135 488  
gi|33285929|gb|AY223844.1| scaffold1198\_2 96.61 236 6 2 2758  
2991 19441 19206 1e-105 390  
gi|33285929|gb|AY223844.1| scaffold1198\_2 94.57 92 5 0 2764  
2855 6693 6784 5e-31 143  
gi|33285929|gb|AY223844.1| scaffold1198\_2 100.00 36 0 0  
3173 3208 205985 206020 3e-08 67.6  
gi|33285929|gb|AY223844.1| scaffold14072 92.40 789 52 7 1700  
2483 1686 901 0.0 1120  
gi|33285929|gb|AY223844.1| scaffold14072 89.26 773 64 13 1713  
2476 926 1688 0.0 950  
gi|33285929|gb|AY223844.1| scaffold7890 92.08 795 62 1 1683  
2476 29869 29075 0.0 1120  
gi|33285929|gb|AY223844.1| scaffold7890 88.64 757 66 15 1713  
2459 29093 29839 0.0 904  
gi|33285929|gb|AY223844.1| scaffold7890 97.94 291 6 0 2753  
3043 26827 27117 5e-140 505  
gi|33285929|gb|AY223844.1| scaffold7890 97.88 283 3 3 2755  
3035 16950 16669 2e-134 486  
gi|33285929|gb|AY223844.1| scaffold5800 92.09 796 59 3 1683  
2476 57951 57158 0.0 1120  
gi|33285929|gb|AY223844.1| scaffold5800 88.49 756 69 12 1713  
2459 57176 57922 0.0 900  
gi|33285929|gb|AY223844.1| scaffold2992 92.37 786 58 2 1695  
2479 40820 41604 0.0 1120  
111  
gi|33285929|gb|AY223844.1| scaffold2992 88.11 774 67 20 1700  
2459 41599 40837 0.0 898  
gi|33285929|gb|AY223844.1| scaffold2992 97.11 277 7 1 2754

3030 144980 145255 2e-128 466  
gi|33285929|gb|AY223844.1| scaffold2992 97.53 243 6 0 2795  
3037 119726 119968 2e-113 416  
gi|33285929|gb|AY223844.1| scaffold2789 91.60 810 67 1 1675  
2484 57045 56237 0.0 1120  
gi|33285929|gb|AY223844.1| scaffold2789 87.47 774 71 20 1700  
2459 56247 57008 0.0 869  
gi|33285929|gb|AY223844.1| scaffold2789 98.90 273 3 0 2764  
3036 136579 136851 5e-135 488  
gi|33285929|gb|AY223844.1| scaffold2789 97.55 286 4 3 2755  
3037 17651 17936 2e-134 486  
gi|33285929|gb|AY223844.1| scaffold2789 95.65 299 9 4 2750  
3047 149199 149494 1e-131 477  
gi|33285929|gb|AY223844.1| scaffold2789 96.18 288 8 3 2752  
3036 120557 120270 7e-129 468  
gi|33285929|gb|AY223844.1| scaffold2789 98.00 50 1 0 2987  
3036 90056 90007 2e-14 87.9  
gi|33285929|gb|AY223844.1| scaffold2611 91.97 797 64 0 1683  
2479 210954 211750 0.0 1120  
gi|33285929|gb|AY223844.1| scaffold2611 87.55 779 76 17 1693  
2459 211752 210983 0.0 883  
gi|33285929|gb|AY223844.1| scaffold2611 97.54 284 7 0 2756  
3039 81819 82102 2e-134 486  
gi|33285929|gb|AY223844.1| scaffold2611 98.53 272 4 0 2764  
3035 100620 100891 9e-133 481  
gi|33285929|gb|AY223844.1| scaffold2527 91.96 796 63 1 1683  
2478 5544 4750 0.0 1120  
gi|33285929|gb|AY223844.1| scaffold2527 88.47 772 67 17 1700  
2459 4754 5515 0.0 918  
gi|33285929|gb|AY223844.1| scaffold2527 97.52 282 5 2 2758  
3037 142260 141979 9e-133 481  
gi|33285929|gb|AY223844.1| scaffold2527 96.58 292 6 4 2752  
3039 167785 167494 9e-133 481  
gi|33285929|gb|AY223844.1| scaffold2527 83.46 127 1 8 2755  
2880 109932 110039 3e-18 100  
gi|33285929|gb|AY223844.1| scaffold2506 92.09 796 59 4 1683  
2476 203500 204293 0.0 1120  
gi|33285929|gb|AY223844.1| scaffold2506 87.16 771 80 14 1700  
2459 204291 203529 0.0 857  
gi|33285929|gb|AY223844.1| scaffold2506 97.15 281 6 2 2758  
3036 86579 86859 1e-130 473  
gi|33285929|gb|AY223844.1| scaffold2506 96.45 282 9 1 2755  
3035 143840 143559 9e-128 464  
gi|33285929|gb|AY223844.1| scaffold2506 82.99 288 41 3 2755  
3042 141050 141329 2e-64 254  
gi|33285929|gb|AY223844.1| scaffold2506 82.70 289 36 11 2754

3038 128042 127764 1e-61 244  
gi|33285929|gb|AY223844.1| scaffold2506 100.00 81 0 0  
2955 3035 145578 145658 3e-33 150  
112  
gi|33285929|gb|AY223844.1| scaffold2506 100.00 69 0 0  
2968 3036 56642 56574 1e-26 128  
gi|33285929|gb|AY223844.1| scaffold2506 94.87 78 4 0 3212  
3289 81575 81652 6e-25 122  
gi|33285929|gb|AY223844.1| scaffold2506 92.77 83 6 0 3208  
3290 3952 4034 2e-24 121  
gi|33285929|gb|AY223844.1| scaffold2394 92.08 795 62 1 1683  
2476 218584 219378 0.0 1120  
gi|33285929|gb|AY223844.1| scaffold2394 88.36 773 68 16 1700  
2459 219376 218613 0.0 909  
gi|33285929|gb|AY223844.1| scaffold2394 93.14 379 26 0 1683  
2061 47978 47600 4e-156 558  
gi|33285929|gb|AY223844.1| scaffold2394 98.97 290 2 1 2748  
3036 149787 149498 7e-144 518  
gi|33285929|gb|AY223844.1| scaffold2394 93.60 344 22 0 2116  
2459 47606 47949 8e-143 514  
gi|33285929|gb|AY223844.1| scaffold2394 99.28 276 1 1 2761  
3035 41638 41913 9e-138 497  
gi|33285929|gb|AY223844.1| scaffold2394 91.77 316 24 2 2166  
2480 47597 47283 5e-120 438  
gi|33285929|gb|AY223844.1| scaffold2394 92.49 293 22 0 1713  
2005 47305 47597 2e-114 420  
gi|33285929|gb|AY223844.1| scaffold2394 82.29 271 28 9 2751  
3015 69378 69634 3e-53 217  
gi|33285929|gb|AY223844.1| scaffold1550 92.08 795 62 1 1683  
2476 55706 56500 0.0 1120  
gi|33285929|gb|AY223844.1| scaffold1550 88.79 767 63 17 1700  
2453 56498 55742 0.0 918  
gi|33285929|gb|AY223844.1| scaffold934 92.10 797 57 4 1683  
2479 121815 121025 0.0 1120  
gi|33285929|gb|AY223844.1| scaffold934 87.58 773 67 18 1700  
2459 121030 121786 0.0 869  
gi|33285929|gb|AY223844.1| scaffold934 98.58 282 3 1 2758  
3038 339003 339284 9e-138 497  
gi|33285929|gb|AY223844.1| scaffold934 97.47 277 6 1 2761  
3036 198817 199093 5e-130 472  
gi|33285929|gb|AY223844.1| scaffold934 92.33 313 24 0 2164  
2476 321754 322066 3e-122 446  
gi|33285929|gb|AY223844.1| scaffold934 91.00 311 25 3 1700  
2007 322064 321754 2e-113 416  
gi|33285929|gb|AY223844.1| scaffold934 93.71 175 11 0 1681  
1855 136624 136798 3e-67 263

gi|33285929|gb|AY223844.1| scaffold934 93.98 166 10 0 1683  
1848 321363 321528 7e-64 252  
gi|33285929|gb|AY223844.1| scaffold934 95.14 144 7 0 2316  
2459 136798 136655 1e-56 228  
gi|33285929|gb|AY223844.1| scaffold934 97.01 134 4 0 2326  
2459 321525 321392 4e-56 226  
gi|33285929|gb|AY223844.1| scaffold934 96.34 82 3 0 3209  
3290 356885 356966 8e-29 135  
gi|33285929|gb|AY223844.1| scaffold836 91.97 797 64 0 1680  
2476 264960 264164 0.0 1120  
113  
gi|33285929|gb|AY223844.1| scaffold836 87.44 772 76 15 1700  
2459 264166 264928 0.0 869  
gi|33285929|gb|AY223844.1| scaffold836 96.86 287 6 3 2752  
3036 161994 162279 1e-131 477  
gi|33285929|gb|AY223844.1| scaffold836 96.77 279 6 3 2758  
3034 331055 331332 3e-127 462  
gi|33285929|gb|AY223844.1| scaffold836 93.55 279 7 5 2755  
3032 195936 195668 5e-110 405  
gi|33285929|gb|AY223844.1| scaffold836 98.66 149 2 0 2884  
3032 230485 230633 9e-68 265  
gi|33285929|gb|AY223844.1| scaffold836 89.38 160 17 0 2854  
3013 160348 160189 7e-49 202  
gi|33285929|gb|AY223844.1| scaffold836 93.65 63 3 1 2755  
2816 230428 230490 5e-16 93.5  
gi|33285929|gb|AY223844.1| scaffold697 91.97 797 64 0 1683  
2479 186958 187754 0.0 1120  
gi|33285929|gb|AY223844.1| scaffold697 88.96 770 62 17 1700  
2456 187749 186990 0.0 931  
gi|33285929|gb|AY223844.1| scaffold697 92.06 428 34 0 1997  
2424 165126 165553 5e-170 604  
gi|33285929|gb|AY223844.1| scaffold697 97.51 281 5 2 2758  
3036 235505 235225 3e-132 479  
gi|33285929|gb|AY223844.1| scaffold697 97.15 281 6 2 2758  
3036 253886 253606 1e-130 473  
gi|33285929|gb|AY223844.1| scaffold697 85.84 438 42 15 1747  
2174 165553 165126 9e-123 448  
gi|33285929|gb|AY223844.1| scaffold697 95.39 282 10 3 2755  
3034 322740 322460 3e-122 446  
gi|33285929|gb|AY223844.1| scaffold697 90.68 322 30 0 1683  
2004 164382 164703 3e-117 429  
gi|33285929|gb|AY223844.1| scaffold697 93.23 266 14 2 2775  
3036 280846 280581 5e-105 388  
gi|33285929|gb|AY223844.1| scaffold697 89.35 291 31 0 2167  
2457 164703 164413 3e-98 366  
gi|33285929|gb|AY223844.1| scaffold697 97.10 207 4 2 2757

2962 207871 207666 9e-93 348  
gi|33285929|gb|AY223844.1| scaffold697 96.43 196 6 1 2758  
2952 195535 195730 6e-85 322  
gi|33285929|gb|AY223844.1| scaffold697 97.19 178 4 1 2751  
2927 351600 351423 3e-78 300  
gi|33285929|gb|AY223844.1| scaffold697 100.00 103 0 0  
2937 3039 139074 138972 2e-45 191  
gi|33285929|gb|AY223844.1| scaffold697 100.00 93 0 0  
2946 3038 195822 195914 6e-40 172  
gi|33285929|gb|AY223844.1| scaffold697 100.00 92 0 0  
2946 3037 89265 89174 2e-39 171  
gi|33285929|gb|AY223844.1| scaffold697 100.00 69 0 0  
2965 3033 351382 351314 1e-26 128  
gi|33285929|gb|AY223844.1| scaffold666 92.07 794 63 0 1683  
2476 163676 164469 0.0 1120  
gi|33285929|gb|AY223844.1| scaffold666 88.07 771 73 13 1700  
2459 164467 163705 0.0 898  
114  
gi|33285929|gb|AY223844.1| scaffold666 96.35 301 5 6 2740  
3038 89126 89422 1e-135 490  
gi|33285929|gb|AY223844.1| scaffold666 94.70 264 8 2 2773  
3036 277656 277913 5e-110 405  
gi|33285929|gb|AY223844.1| scaffold666 98.94 188 2 0 2764  
2951 280667 280854 2e-89 337  
gi|33285929|gb|AY223844.1| scaffold666 100.00 124 0 0  
2912 3035 221033 220910 3e-57 230  
gi|33285929|gb|AY223844.1| scaffold666 80.57 211 29 5 2796  
3005 142526 142327 8e-34 152  
gi|33285929|gb|AY223844.1| scaffold666 94.92 59 1 2 2755  
2811 219626 219684 2e-15 91.6  
gi|33285929|gb|AY223844.1| scaffold119 91.97 797 64 0 1680  
2476 508104 507308 0.0 1120  
gi|33285929|gb|AY223844.1| scaffold119 87.56 772 75 15 1700  
2459 507310 508072 0.0 874  
gi|33285929|gb|AY223844.1| scaffold119 98.23 282 2 3 2754  
3032 135411 135692 1e-135 490  
gi|33285929|gb|AY223844.1| scaffold119 97.87 282 4 2 2758  
3037 163325 163606 2e-134 486  
gi|33285929|gb|AY223844.1| scaffold119 96.83 284 6 3 2755  
3035 548047 547764 5e-130 472  
gi|33285929|gb|AY223844.1| scaffold119 95.92 294 6 6 2751  
3038 596868 596575 5e-130 472  
gi|33285929|gb|AY223844.1| scaffold119 96.09 281 9 2 2758  
3036 236349 236629 1e-125 457  
gi|33285929|gb|AY223844.1| scaffold119 96.70 273 9 0 2757  
3029 563508 563236 5e-125 455

gi|33285929|gb|AY223844.1| scaffold119 97.77 224 4 1 2755  
2977 619680 619903 7e-104 385  
gi|33285929|gb|AY223844.1| scaffold119 88.28 145 16 1 2774  
2918 194933 194790 6e-40 172  
gi|33285929|gb|AY223844.1| scaffold119 95.51 89 3 1 3203  
3290 503444 503356 2e-30 141  
gi|33285929|gb|AY223844.1| scaffold119 85.19 81 11 1 2891  
2971 264033 264112 1e-12 82.4  
gi|33285929|gb|AY223844.1| scaffold119 100.00 34 0 0  
2911 2944 364304 364337 4e-07 63.9  
gi|33285929|gb|AY223844.1| scaffold43 92.07 794 63 0 1683 2476  
411867 411074 0.0 1120  
gi|33285929|gb|AY223844.1| scaffold43 87.69 772 74 15 1700 2459  
411076 411838 0.0 881  
gi|33285929|gb|AY223844.1| scaffold43 99.30 286 2 0 2751 3036  
32535 32250 7e-144 518  
gi|33285929|gb|AY223844.1| scaffold43 99.64 277 1 0 2757 3033  
126674 126950 1e-140 507  
gi|33285929|gb|AY223844.1| scaffold43 99.28 277 2 0 2761 3037  
151156 151432 7e-139 501  
gi|33285929|gb|AY223844.1| scaffold43 98.56 277 4 0 2764 3040  
741934 741658 1e-135 490  
gi|33285929|gb|AY223844.1| scaffold43 98.18 275 5 0 2764 3038  
597505 597779 9e-133 481  
115  
gi|33285929|gb|AY223844.1| scaffold43 96.88 288 6 3 2755 3039  
469786 469499 3e-132 479  
gi|33285929|gb|AY223844.1| scaffold43 96.21 290 7 4 2750 3035  
284067 283778 5e-130 472  
gi|33285929|gb|AY223844.1| scaffold43 97.46 276 5 2 2764 3038  
766161 766435 2e-129 470  
gi|33285929|gb|AY223844.1| scaffold43 94.62 279 8 5 2754 3030  
549656 549929 4e-116 425  
gi|33285929|gb|AY223844.1| scaffold43 98.20 222 4 0 2815 3036  
423049 422828 5e-105 388  
gi|33285929|gb|AY223844.1| scaffold43 96.97 198 5 1 2755 2951  
99524 99721 9e-88 331  
gi|33285929|gb|AY223844.1| scaffold43 98.08 156 1 2 2757 2910  
513394 513549 2e-69 270  
gi|33285929|gb|AY223844.1| scaffold43 91.04 201 16 2 1675 1874  
753609 753410 2e-69 270  
gi|33285929|gb|AY223844.1| scaffold43 100.00 128 0 0 2909  
3036 513771 513898 2e-59 237  
gi|33285929|gb|AY223844.1| scaffold43 94.19 155 9 0 2305 2459  
753417 753571 2e-59 237  
gi|33285929|gb|AY223844.1| scaffold43 91.57 166 11 3 1900 2062

752379 752214 1e-56 228  
gi|33285929|gb|AY223844.1| scaffold43 98.13 107 2 0 2931 3037  
351784 351678 2e-44 187  
gi|33285929|gb|AY223844.1| scaffold43 88.82 152 16 1 2760 2911  
659988 659838 8e-44 185  
gi|33285929|gb|AY223844.1| scaffold43 86.79 159 18 2 2116 2271  
752221 752379 2e-40 174  
gi|33285929|gb|AY223844.1| scaffold43 98.84 86 1 0 2949 3034  
320442 320357 2e-34 154  
gi|33285929|gb|AY223844.1| scaffold43 96.92 65 2 0 2820 2884  
351851 351787 5e-21 110  
gi|33285929|gb|AY223844.1| scaffold43 93.55 62 3 1 2751 2811  
320503 320442 2e-15 91.6  
gi|33285929|gb|AY223844.1| scaffold43 100.00 49 0 0 2990  
3038 598019 598067 2e-15 91.6  
gi|33285929|gb|AY223844.1| scaffold43 90.14 71 4 3 2755 2822  
354239 354169 6e-15 89.8  
gi|33285929|gb|AY223844.1| scaffold37 92.00 800 58 3 1683 2476  
322595 323394 0.0 1120  
gi|33285929|gb|AY223844.1| scaffold37 88.31 770 69 15 1700 2457  
323392 322632 0.0 905  
gi|33285929|gb|AY223844.1| scaffold37 96.95 295 4 5 2758 3049  
464435 464727 1e-135 490  
gi|33285929|gb|AY223844.1| scaffold37 98.17 273 5 0 2764 3036  
569410 569138 1e-131 477  
gi|33285929|gb|AY223844.1| scaffold37 97.16 282 6 2 2758 3037  
766031 766312 4e-131 475  
gi|33285929|gb|AY223844.1| scaffold37 96.45 282 2 4 2755 3035  
772729 773003 4e-126 459  
gi|33285929|gb|AY223844.1| scaffold37 98.45 258 4 0 2779 3036  
665551 665808 5e-125 455  
116  
gi|33285929|gb|AY223844.1| scaffold37 97.84 231 3 2 2758 2986  
677835 677605 9e-108 398  
gi|33285929|gb|AY223844.1| scaffold37 98.34 181 3 0 2754 2934  
212263 212083 7e-84 318  
gi|33285929|gb|AY223844.1| scaffold37 99.28 138 1 0 2899 3036  
109639 109776 3e-63 250  
gi|33285929|gb|AY223844.1| scaffold37 96.67 150 4 1 2758 2906  
105148 105297 9e-63 248  
gi|33285929|gb|AY223844.1| scaffold10 92.08 795 61 2 1683 2476  
409143 408350 0.0 1120  
gi|33285929|gb|AY223844.1| scaffold10 91.40 721 62 0 1739 2459  
306911 306191 0.0 990  
gi|33285929|gb|AY223844.1| scaffold10 89.15 774 61 19 1700 2460  
408352 409115 0.0 942

gi|33285929|gb|AY223844.1| scaffold10 88.16 760 70 14 1683 2432  
306162 306911 0.0 887  
gi|33285929|gb|AY223844.1| scaffold10 97.89 284 5 1 2750 3033  
418837 419119 1e-135 490  
gi|33285929|gb|AY223844.1| scaffold10 97.23 289 7 1 2749 3036  
406609 406897 5e-135 488  
gi|33285929|gb|AY223844.1| scaffold10 97.51 281 5 2 2758 3036  
550104 549824 3e-132 479  
gi|33285929|gb|AY223844.1| scaffold10 97.81 274 6 0 2764 3037  
510234 509961 1e-130 473  
gi|33285929|gb|AY223844.1| scaffold10 96.53 288 4 5 2755 3036  
562380 562667 5e-130 472  
gi|33285929|gb|AY223844.1| scaffold10 98.86 263 3 0 2751 3013  
892890 893152 2e-129 470  
gi|33285929|gb|AY223844.1| scaffold10 96.45 282 7 3 2755 3033  
842115 842396 3e-127 462  
gi|33285929|gb|AY223844.1| scaffold10 98.54 205 2 1 2833 3036  
826137 826341 1e-96 361  
gi|33285929|gb|AY223844.1| scaffold10 95.71 140 6 0 2778 2917  
588464 588325 4e-56 226  
gi|33285929|gb|AY223844.1| scaffold10 96.00 125 4 1 2754 2877  
527666 527542 7e-49 202  
gi|33285929|gb|AY223844.1| scaffold10 98.11 106 2 0 2927 3032  
774098 774203 8e-44 185  
gi|33285929|gb|AY223844.1| scaffold10 96.30 108 3 1 2751 2858  
773929 774035 5e-41 176  
gi|33285929|gb|AY223844.1| scaffold10 82.16 185 25 7 2760 2938  
94924 94742 8e-34 152  
gi|33285929|gb|AY223844.1| scaffold10 83.83 167 19 3 2831 2989  
589565 589399 8e-34 152  
gi|33285929|gb|AY223844.1| scaffold10 100.00 80 0 0 2956  
3035 593400 593479 1e-32 148  
gi|33285929|gb|AY223844.1| scaffold10 96.97 33 1 0 3174 3206  
27204 27172 6e-05 56.5  
gi|33285929|gb|AY223844.1| scaffold12361 91.82 807 57 4 1683  
2480 12119 11313 0.0 1118  
gi|33285929|gb|AY223844.1| scaffold12361 87.29 771 72 15 1707  
2459 11328 12090 0.0 859  
117  
gi|33285929|gb|AY223844.1| scaffold9997 91.96 796 64 0 1681  
2476 36188 35393 0.0 1118  
gi|33285929|gb|AY223844.1| scaffold9997 87.71 773 72 16 1700  
2459 35395 36157 0.0 881  
gi|33285929|gb|AY223844.1| scaffold8325 91.96 796 64 0 1681  
2476 70926 70131 0.0 1118  
gi|33285929|gb|AY223844.1| scaffold8325 87.16 771 80 14 1700



2459 70133 70895 0.0 859  
gi|33285929|gb|AY223844.1| scaffold7885 92.26 788 59 2 1683  
2470 5242 6027 0.0 1118  
gi|33285929|gb|AY223844.1| scaffold7885 87.47 766 76 14 1704  
2459 6026 5271 0.0 867  
gi|33285929|gb|AY223844.1| scaffold6883 92.08 795 59 4 1683  
2476 39436 38645 0.0 1118  
gi|33285929|gb|AY223844.1| scaffold6883 88.37 774 63 21 1700  
2459 38647 39407 0.0 905  
gi|33285929|gb|AY223844.1| scaffold6565 92.09 796 58 3 1681  
2476 64229 63439 0.0 1118  
gi|33285929|gb|AY223844.1| scaffold6565 88.07 771 64 20 1700  
2457 63441 64196 0.0 889  
gi|33285929|gb|AY223844.1| scaffold6565 97.03 269 7 1 2764  
3032 1856 1589 7e-124 451  
gi|33285929|gb|AY223844.1| scaffold6379 91.96 796 64 0 1681  
2476 69687 70482 0.0 1118  
gi|33285929|gb|AY223844.1| scaffold6379 88.62 773 65 17 1700  
2459 70480 69718 0.0 918  
gi|33285929|gb|AY223844.1| scaffold6379 99.62 265 1 0 2764  
3028 97817 97553 7e-134 484  
gi|33285929|gb|AY223844.1| scaffold6379 100.00 36 0 0  
3173 3208 18137 18172 3e-08 67.6  
gi|33285929|gb|AY223844.1| scaffold6211 91.96 796 64 0 1681  
2476 70774 71569 0.0 1118  
gi|33285929|gb|AY223844.1| scaffold6211 90.04 763 67 5 1700  
2459 61953 62709 0.0 981  
gi|33285929|gb|AY223844.1| scaffold6211 88.34 755 72 9 1713  
2459 71551 70805 0.0 894  
gi|33285929|gb|AY223844.1| scaffold6211 87.17 803 79 14 1683  
2476 62738 61951 0.0 891  
gi|33285929|gb|AY223844.1| scaffold6211 97.58 289 6 1 2751  
3038 58879 58591 1e-136 494  
gi|33285929|gb|AY223844.1| scaffold6211 97.47 277 6 1 2754  
3029 32195 31919 5e-130 472  
gi|33285929|gb|AY223844.1| scaffold6211 95.27 296 12 2 2751  
3044 21823 21528 7e-129 468  
gi|33285929|gb|AY223844.1| scaffold6211 97.75 178 4 0 2738  
2915 49913 49736 2e-80 307  
gi|33285929|gb|AY223844.1| scaffold3270 91.97 797 62 2 1681  
2476 95527 94732 0.0 1118  
gi|33285929|gb|AY223844.1| scaffold3270 87.03 771 81 13 1700  
2459 94734 95496 0.0 854  
gi|33285929|gb|AY223844.1| scaffold3090 92.07 794 62 1 1683  
2476 10278 11070 0.0 1118

gi|33285929|gb|AY223844.1| scaffold3090 87.06 773 76 18 1700  
2459 11068 10307 0.0 852  
gi|33285929|gb|AY223844.1| scaffold3090 98.60 286 4 0 2751  
3036 39538 39823 1e-140 507  
gi|33285929|gb|AY223844.1| scaffold3090 81.06 264 41 7 2749  
3009 41241 41498 7e-49 202  
gi|33285929|gb|AY223844.1| scaffold2967 92.09 796 58 4 1683  
2476 153842 153050 0.0 1118  
gi|33285929|gb|AY223844.1| scaffold2967 88.52 775 62 21 1700  
2459 153052 153814 0.0 913  
gi|33285929|gb|AY223844.1| scaffold2967 98.58 282 2 2 2758  
3037 11038 11319 9e-138 497  
gi|33285929|gb|AY223844.1| scaffold2967 98.23 282 4 1 2755  
3036 136158 135878 4e-136 492  
gi|33285929|gb|AY223844.1| scaffold2967 97.14 280 7 1 2755  
3033 167013 167292 5e-130 472  
gi|33285929|gb|AY223844.1| scaffold2967 96.39 277 6 3 2755  
3030 69868 69595 2e-124 453  
gi|33285929|gb|AY223844.1| scaffold2967 97.62 126 3 0 2764  
2889 141377 141252 3e-53 217  
gi|33285929|gb|AY223844.1| scaffold2967 100.00 104 0 0  
2932 3035 139095 138992 5e-46 193  
gi|33285929|gb|AY223844.1| scaffold2655 91.96 796 64 0 1681  
2476 85785 86580 0.0 1118  
gi|33285929|gb|AY223844.1| scaffold2655 87.95 772 72 16 1700  
2459 86578 85816 0.0 893  
gi|33285929|gb|AY223844.1| scaffold2655 96.94 294 5 4 2752  
3041 71457 71164 1e-135 490  
gi|33285929|gb|AY223844.1| scaffold2655 97.54 284 5 1 2751  
3032 216881 217164 7e-134 484  
gi|33285929|gb|AY223844.1| scaffold2655 96.82 283 7 2 2755  
3035 24122 23840 5e-130 472  
gi|33285929|gb|AY223844.1| scaffold2655 96.13 284 6 4 2755  
3035 122975 122694 4e-126 459  
gi|33285929|gb|AY223844.1| scaffold2655 84.56 259 33 5 2759  
3015 90669 90922 3e-63 250  
gi|33285929|gb|AY223844.1| scaffold2655 98.00 100 2 0 2937  
3036 217165 217264 2e-40 174  
gi|33285929|gb|AY223844.1| scaffold2655 82.05 78 6 4 2777  
2846 15444 15521 5e-06 60.2  
gi|33285929|gb|AY223844.1| scaffold2609 92.07 794 62 1 1683  
2476 53848 53056 0.0 1118  
gi|33285929|gb|AY223844.1| scaffold2609 88.87 755 67 11 1713  
2459 53074 53819 0.0 915  
gi|33285929|gb|AY223844.1| scaffold2609 97.17 283 8 0 2751  
3033 144053 143771 3e-132 479

gi|33285929|gb|AY223844.1| scaffold2609 96.76 216 4 3 2756  
2968 204158 203943 2e-95 357  
gi|33285929|gb|AY223844.1| scaffold2609 96.34 82 3 0 3209  
3290 197411 197330 8e-29 135  
gi|33285929|gb|AY223844.1| scaffold2609 97.40 77 2 0 2960  
3036 199347 199271 1e-27 132  
119  
gi|33285929|gb|AY223844.1| scaffold2609 100.00 34 0 0  
3173 3206 146908 146875 4e-07 63.9  
gi|33285929|gb|AY223844.1| scaffold2483 91.89 801 62 2 1683  
2480 105245 104445 0.0 1118  
gi|33285929|gb|AY223844.1| scaffold2483 86.98 776 75 19 1700  
2459 104451 105216 0.0 850  
gi|33285929|gb|AY223844.1| scaffold2483 97.57 288 4 3 2752  
3036 157916 157629 1e-135 490  
gi|33285929|gb|AY223844.1| scaffold2483 98.53 272 4 0 2764  
3035 141301 141572 9e-133 481  
gi|33285929|gb|AY223844.1| scaffold2483 94.58 240 1 4 2764  
3003 49213 49440 1e-96 361  
gi|33285929|gb|AY223844.1| scaffold2483 96.82 157 5 0 2880  
3036 209506 209350 3e-67 263  
gi|33285929|gb|AY223844.1| scaffold2483 96.83 126 2 2 2758  
2881 211249 211124 4e-51 209  
gi|33285929|gb|AY223844.1| scaffold1724 91.86 799 65 0 1680  
2478 261856 262654 0.0 1118  
gi|33285929|gb|AY223844.1| scaffold1724 91.22 797 68 2 1683  
2479 68097 68891 0.0 1085  
gi|33285929|gb|AY223844.1| scaffold1724 88.58 762 66 18 1707  
2457 262641 261890 0.0 905  
gi|33285929|gb|AY223844.1| scaffold1724 87.03 771 79 15 1700  
2459 68886 68126 0.0 852  
gi|33285929|gb|AY223844.1| scaffold1724 93.62 282 14 4 2754  
3033 117294 117015 7e-114 418  
gi|33285929|gb|AY223844.1| scaffold1724 88.04 92 11 0 2912  
3003 161679 161588 5e-21 110  
gi|33285929|gb|AY223844.1| scaffold991 92.07 794 62 1 1683  
2476 20535 21327 0.0 1118  
gi|33285929|gb|AY223844.1| scaffold991 87.16 771 75 18 1700  
2457 21325 20566 0.0 854  
gi|33285929|gb|AY223844.1| scaffold991 98.58 281 4 0 2756  
3036 261648 261368 9e-138 497  
gi|33285929|gb|AY223844.1| scaffold991 97.22 288 4 4 2752  
3035 58877 59164 7e-134 484  
gi|33285929|gb|AY223844.1| scaffold991 97.54 285 4 3 2755  
3036 158386 158102 7e-134 484  
gi|33285929|gb|AY223844.1| scaffold991 96.49 285 7 3 2754

3036 4021 3738 7e-129 468  
gi|33285929|gb|AY223844.1| scaffold991 92.05 151 12 0 2761  
2911 84565 84415 3e-52 213  
gi|33285929|gb|AY223844.1| scaffold991 85.63 167 10 8 2839  
3005 119389 119237 4e-37 163  
gi|33285929|gb|AY223844.1| scaffold991 87.60 129 16 0 2876  
3004 342382 342510 3e-33 150  
gi|33285929|gb|AY223844.1| scaffold991 97.78 45 1 0 2828  
2872 75177 75133 1e-11 78.7  
gi|33285929|gb|AY223844.1| scaffold125 92.07 794 61 2 1683  
2476 94877 94086 0.0 1118  
gi|33285929|gb|AY223844.1| scaffold125 87.63 768 74 16 1700  
2456 94088 94845 0.0 874  
120  
gi|33285929|gb|AY223844.1| scaffold125 98.59 283 2 2 2757  
3037 603618 603336 2e-138 499  
gi|33285929|gb|AY223844.1| scaffold125 97.23 289 5 3 2751  
3036 321498 321210 2e-134 486  
gi|33285929|gb|AY223844.1| scaffold125 97.52 282 6 1 2755  
3036 138840 138560 9e-133 481  
gi|33285929|gb|AY223844.1| scaffold125 97.52 282 5 2 2758  
3037 542478 542197 9e-133 481  
gi|33285929|gb|AY223844.1| scaffold125 92.24 335 21 4 1700  
2029 470491 470157 2e-129 470  
gi|33285929|gb|AY223844.1| scaffold125 96.15 286 9 2 2752  
3036 152019 151735 2e-128 466  
gi|33285929|gb|AY223844.1| scaffold125 96.48 284 6 4 2752  
3031 189741 189458 2e-128 466  
gi|33285929|gb|AY223844.1| scaffold125 89.91 337 32 2 2142  
2476 470157 470493 2e-118 433  
gi|33285929|gb|AY223844.1| scaffold125 92.20 282 19 3 2758  
3036 115354 115073 3e-107 396  
gi|33285929|gb|AY223844.1| scaffold125 99.37 159 1 0 2878  
3036 311555 311713 6e-75 289  
gi|33285929|gb|AY223844.1| scaffold11312 92.05 792 63 0 1688  
2479 26199 26990 0.0 1116  
gi|33285929|gb|AY223844.1| scaffold11312 87.18 772 78 16 1700  
2459 26985 26223 0.0 857  
gi|33285929|gb|AY223844.1| scaffold4657 92.07 794 60 3 1683  
2476 99570 98780 0.0 1116  
gi|33285929|gb|AY223844.1| scaffold4657 88.36 773 64 18 1700  
2459 98782 99541 0.0 907  
gi|33285929|gb|AY223844.1| scaffold4657 98.59 284 1 3 2755  
3035 123681 123964 2e-138 499  
gi|33285929|gb|AY223844.1| scaffold4657 97.18 284 5 3 2755  
3035 129680 129963 1e-131 477

gi|33285929|gb|AY223844.1| scaffold4657 91.07 291 15 4 2751  
3036 8899 8615 2e-103 383  
gi|33285929|gb|AY223844.1| scaffold4298 91.86 799 63 2 1683  
2480 50409 49612 0.0 1116  
gi|33285929|gb|AY223844.1| scaffold4298 87.71 773 72 17 1700  
2459 49618 50380 0.0 880  
gi|33285929|gb|AY223844.1| scaffold4298 91.52 165 14 0 2839  
3003 144305 144469 1e-56 228  
gi|33285929|gb|AY223844.1| scaffold4141 92.75 772 55 1 1683  
2453 26646 27417 0.0 1116  
gi|33285929|gb|AY223844.1| scaffold4141 87.90 752 74 11 1717  
2459 27418 26675 0.0 870  
gi|33285929|gb|AY223844.1| scaffold4141 92.78 277 13 4 2758  
3033 153950 153680 1e-111 411  
gi|33285929|gb|AY223844.1| scaffold3409 92.07 794 61 2 1683  
2476 159003 159794 0.0 1116  
gi|33285929|gb|AY223844.1| scaffold3409 88.72 771 62 18 1700  
2457 159792 159034 0.0 918  
gi|33285929|gb|AY223844.1| scaffold2917 91.96 796 62 1 1681  
2476 67286 68079 0.0 1116  
121  
gi|33285929|gb|AY223844.1| scaffold2917 88.60 772 65 17 1700  
2459 68077 67317 0.0 917  
gi|33285929|gb|AY223844.1| scaffold2917 96.08 255 7 3 2754  
3006 96760 97013 3e-112 412  
gi|33285929|gb|AY223844.1| scaffold2917 85.54 242 26 4 2761  
3002 24183 23951 1e-61 244  
gi|33285929|gb|AY223844.1| scaffold2917 80.18 111 17 5 2755  
2863 138989 139096 1e-11 78.7  
gi|33285929|gb|AY223844.1| scaffold13163 91.94 794 64 0 1683  
2476 22550 21757 0.0 1114  
gi|33285929|gb|AY223844.1| scaffold13163 91.01 801 70 2 1677  
2476 19502 20301 0.0 1081  
gi|33285929|gb|AY223844.1| scaffold13163 87.39 777 73 19 1697  
2459 20303 19538 0.0 869  
gi|33285929|gb|AY223844.1| scaffold13163 86.93 773 78 17 1700  
2459 21759 22521 0.0 846  
gi|33285929|gb|AY223844.1| scaffold9618 93.68 744 46 1 1717  
2459 28988 29731 0.0 1114  
gi|33285929|gb|AY223844.1| scaffold9618 88.90 811 65 19 1683  
2480 29760 28962 0.0 976  
gi|33285929|gb|AY223844.1| scaffold9618 83.61 183 26 3 2763  
2944 21615 21436 8e-39 169  
gi|33285929|gb|AY223844.1| scaffold7329 93.15 759 51 1 1683  
2441 85455 86212 0.0 1114  
gi|33285929|gb|AY223844.1| scaffold7329 87.67 738 74 11 1730

2459 86212 85484 0.0 845  
gi|33285929|gb|AY223844.1| scaffold7161 91.94 794 64 0 1683  
2476 53698 54491 0.0 1114  
gi|33285929|gb|AY223844.1| scaffold7161 87.29 763 78 15 1707  
2459 54480 53727 0.0 854  
gi|33285929|gb|AY223844.1| scaffold7161 97.23 253 5 2 2755  
3005 24728 24980 1e-116 427  
gi|33285929|gb|AY223844.1| scaffold7014 91.84 797 65 0 1683  
2479 44324 45120 0.0 1114  
gi|33285929|gb|AY223844.1| scaffold7014 87.81 771 75 13 1700  
2459 45115 44353 0.0 887  
gi|33285929|gb|AY223844.1| scaffold6259 91.94 794 64 0 1683  
2476 16020 15227 0.0 1114  
gi|33285929|gb|AY223844.1| scaffold6259 88.08 755 74 10 1713  
2459 15245 15991 0.0 883  
gi|33285929|gb|AY223844.1| scaffold6259 98.17 273 5 0 2764  
3036 50086 49814 1e-131 477  
gi|33285929|gb|AY223844.1| scaffold6259 96.53 144 3 2 2758  
2899 25769 25912 2e-59 237  
gi|33285929|gb|AY223844.1| scaffold6259 81.25 288 41 6 2752  
3035 46832 47110 2e-54 220  
gi|33285929|gb|AY223844.1| scaffold5534 91.95 795 62 2 1679  
2471 25082 25876 0.0 1114  
gi|33285929|gb|AY223844.1| scaffold5534 87.60 782 72 19 1692  
2459 25886 25116 0.0 883  
gi|33285929|gb|AY223844.1| scaffold5534 92.36 144 6 4 2757  
2896 116813 116671 3e-48 200  
122  
gi|33285929|gb|AY223844.1| scaffold5534 83.54 164 21 3 2753  
2916 92138 92295 1e-32 148  
gi|33285929|gb|AY223844.1| scaffold5460 91.69 806 62 4 1673  
2476 50633 49831 0.0 1114  
gi|33285929|gb|AY223844.1| scaffold5460 88.61 755 69 12 1713  
2459 49849 50594 0.0 902  
gi|33285929|gb|AY223844.1| scaffold5460 84.10 239 37 1 2754  
2992 68045 68282 3e-57 230  
gi|33285929|gb|AY223844.1| scaffold4665 91.84 797 65 0 1683  
2479 103893 104689 0.0 1114  
gi|33285929|gb|AY223844.1| scaffold4665 87.69 780 73 16 1693  
2459 104691 103922 0.0 889  
gi|33285929|gb|AY223844.1| scaffold4665 99.28 276 2 0 2761  
3036 105801 106076 2e-138 499  
gi|33285929|gb|AY223844.1| scaffold4665 99.27 273 2 0 2764  
3036 64294 64022 1e-136 494  
gi|33285929|gb|AY223844.1| scaffold4665 97.87 282 6 0 2752  
3033 54565 54846 5e-135 488

gi|33285929|gb|AY223844.1| scaffold4665 96.85 286 3 3 2757  
3036 114040 114325 1e-130 473  
gi|33285929|gb|AY223844.1| scaffold4117 91.94 794 64 0 1683  
2476 143757 142964 0.0 1114  
gi|33285929|gb|AY223844.1| scaffold4117 87.29 771 79 14 1700  
2459 142966 143728 0.0 865  
gi|33285929|gb|AY223844.1| scaffold4117 97.56 287 3 4 2754  
3036 187687 187401 5e-135 488  
gi|33285929|gb|AY223844.1| scaffold4117 96.53 288 7 3 2756  
3042 245141 245426 1e-130 473  
gi|33285929|gb|AY223844.1| scaffold4117 97.21 251 7 0 2755  
3005 112049 112299 4e-116 425  
gi|33285929|gb|AY223844.1| scaffold4117 98.03 152 3 0 2764  
2915 133065 133216 9e-68 265  
gi|33285929|gb|AY223844.1| scaffold4117 95.65 115 0 2 2916  
3030 136329 136438 4e-42 180  
gi|33285929|gb|AY223844.1| scaffold4117 93.16 117 6 2 2758  
2872 124306 124422 2e-39 171  
gi|33285929|gb|AY223844.1| scaffold4117 92.73 55 4 0 2951  
3005 211130 211076 4e-12 80.5  
gi|33285929|gb|AY223844.1| scaffold3862 91.96 796 61 2 1681  
2476 111697 112489 0.0 1114  
gi|33285929|gb|AY223844.1| scaffold3862 87.68 771 73 15 1700  
2459 112487 111728 0.0 880  
gi|33285929|gb|AY223844.1| scaffold3862 96.79 280 8 1 2752  
3030 8934 9213 2e-128 466  
gi|33285929|gb|AY223844.1| scaffold3862 95.85 289 8 4 2752  
3036 148319 148607 9e-128 464  
gi|33285929|gb|AY223844.1| scaffold3862 96.14 207 3 4 2758  
2962 39009 38806 3e-88 333  
gi|33285929|gb|AY223844.1| scaffold3862 98.73 157 2 0 2880  
3036 33696 33540 3e-72 279  
gi|33285929|gb|AY223844.1| scaffold2961 91.56 806 68 0 1675  
2480 180771 179966 0.0 1114  
123  
gi|33285929|gb|AY223844.1| scaffold2961 87.37 768 75 16 1704  
2459 179977 180734 0.0 861  
gi|33285929|gb|AY223844.1| scaffold2961 97.53 283 7 0 2754  
3036 137415 137697 7e-134 484  
gi|33285929|gb|AY223844.1| scaffold2961 96.43 280 8 2 2757  
3035 136486 136764 1e-126 460  
gi|33285929|gb|AY223844.1| scaffold2961 98.35 182 3 0 2751  
2932 134151 134332 2e-84 320  
gi|33285929|gb|AY223844.1| scaffold2961 98.01 151 3 0 2886  
3036 96804 96954 3e-67 263  
gi|33285929|gb|AY223844.1| scaffold2961 92.47 93 4 2 2755

2844 96710 96802 4e-27 130  
gi|33285929|gb|AY223844.1| scaffold2961 84.09 132 18 3 2865  
2996 131649 131777 2e-25 124  
gi|33285929|gb|AY223844.1| scaffold2790 91.76 801 64 2 1681  
2480 23529 22730 0.0 1114  
gi|33285929|gb|AY223844.1| scaffold2790 87.58 773 73 17 1700  
2459 22736 23498 0.0 876  
gi|33285929|gb|AY223844.1| scaffold2790 96.77 279 5 3 2761  
3035 62197 62475 3e-127 462  
gi|33285929|gb|AY223844.1| scaffold2790 97.38 267 7 0 2764  
3030 81608 81874 5e-125 455  
gi|33285929|gb|AY223844.1| scaffold2790 90.94 254 1 6 2787  
3035 30696 30460 6e-85 322  
gi|33285929|gb|AY223844.1| scaffold2790 94.94 158 5 3 2755  
2909 25392 25235 1e-61 244  
gi|33285929|gb|AY223844.1| scaffold2097 91.84 797 65 0 1683  
2479 55520 56316 0.0 1114  
gi|33285929|gb|AY223844.1| scaffold2097 88.60 772 67 15 1700  
2459 56311 55549 0.0 920  
gi|33285929|gb|AY223844.1| scaffold2097 97.90 286 5 1 2751  
3036 149111 149395 1e-136 494  
gi|33285929|gb|AY223844.1| scaffold2097 97.54 285 5 2 2750  
3032 173020 173304 2e-134 486  
gi|33285929|gb|AY223844.1| scaffold2097 89.84 374 33 2 1683  
2056 170490 170122 4e-131 475  
gi|33285929|gb|AY223844.1| scaffold2097 88.95 344 33 2 2116  
2459 170123 170461 2e-114 420  
gi|33285929|gb|AY223844.1| scaffold2097 90.18 285 6 6 2751  
3035 85808 85546 7e-94 351  
gi|33285929|gb|AY223844.1| scaffold2097 90.53 264 25 0 2213  
2476 170088 169825 3e-93 350  
gi|33285929|gb|AY223844.1| scaffold2097 88.89 279 28 3 1700  
1975 169827 170105 2e-90 340  
gi|33285929|gb|AY223844.1| scaffold2057 91.94 794 64 0 1683  
2476 116809 116016 0.0 1114  
gi|33285929|gb|AY223844.1| scaffold2057 88.57 770 67 16 1700  
2457 116018 116778 0.0 917  
gi|33285929|gb|AY223844.1| scaffold2057 98.53 273 4 0 2764  
3036 164444 164716 2e-133 483  
gi|33285929|gb|AY223844.1| scaffold2057 96.48 284 5 4 2755  
3033 216298 216015 9e-128 464  
124  
gi|33285929|gb|AY223844.1| scaffold2057 100.00 35 0 0  
3174 3208 145589 145555 1e-07 65.8  
gi|33285929|gb|AY223844.1| scaffold1508 91.96 796 61 3 1683  
2476 85355 84561 0.0 1114



gi|33285929|gb|AY223844.1| scaffold1508 87.82 772 70 18 1700  
2457 84563 85324 0.0 883  
gi|33285929|gb|AY223844.1| scaffold1508 97.90 286 5 1 2752  
3036 25779 26064 1e-136 494  
gi|33285929|gb|AY223844.1| scaffold1508 95.70 186 5 2 2758  
2940 184842 185027 3e-77 296  
gi|33285929|gb|AY223844.1| scaffold1508 86.36 88 12 0 2340  
2427 174283 174196 4e-17 97.1  
gi|33285929|gb|AY223844.1| scaffold1494 91.94 794 64 0 1683  
2476 265108 265901 0.0 1114  
gi|33285929|gb|AY223844.1| scaffold1494 88.20 754 71 12 1713  
2457 265883 265139 0.0 885  
gi|33285929|gb|AY223844.1| scaffold1494 91.70 446 37 0 2034  
2479 45907 45462 5e-175 621  
gi|33285929|gb|AY223844.1| scaffold1494 90.93 375 33 1 2105  
2479 44151 44524 2e-139 503  
gi|33285929|gb|AY223844.1| scaffold1494 90.53 359 31 3 1700  
2055 44519 44161 5e-130 472  
gi|33285929|gb|AY223844.1| scaffold1494 90.53 359 31 3 1700  
2055 45467 45825 5e-130 472  
gi|33285929|gb|AY223844.1| scaffold1494 93.80 258 16 0 1785  
2042 43898 44155 5e-105 388  
gi|33285929|gb|AY223844.1| scaffold1494 93.55 248 16 0 1785  
2032 46210 45963 2e-99 370  
gi|33285929|gb|AY223844.1| scaffold1494 91.92 260 17 4 2129  
2386 44155 43898 1e-96 361  
gi|33285929|gb|AY223844.1| scaffold1494 91.60 250 17 4 2139  
2386 45963 46210 4e-91 342  
gi|33285929|gb|AY223844.1| scaffold1494 92.11 114 8 1 1683  
1796 43729 43841 5e-36 159  
gi|33285929|gb|AY223844.1| scaffold1494 92.11 114 8 1 1683  
1796 46380 46268 5e-36 159  
gi|33285929|gb|AY223844.1| scaffold1494 100.00 79 0 0  
2958 3036 83005 82927 4e-32 147  
gi|33285929|gb|AY223844.1| scaffold1494 92.94 85 6 0 2375  
2459 43841 43757 2e-25 124  
gi|33285929|gb|AY223844.1| scaffold1494 92.94 85 6 0 2375  
2459 46268 46352 2e-25 124  
gi|33285929|gb|AY223844.1| scaffold1089 91.84 797 65 0 1683  
2479 210927 210131 0.0 1114  
gi|33285929|gb|AY223844.1| scaffold1089 88.04 769 73 14 1700  
2457 210136 210896 0.0 894  
gi|33285929|gb|AY223844.1| scaffold1089 98.27 289 4 1 2751  
3038 192110 191822 5e-140 505  
gi|33285929|gb|AY223844.1| scaffold1089 98.88 178 2 0 2858  
3035 301458 301635 7e-84 318

gi|33285929|gb|AY223844.1| scaffold1089 85.88 177 24 1 2824  
2999 108158 108334 2e-44 187  
125  
gi|33285929|gb|AY223844.1| scaffold1089 94.59 111 4 2 2758  
2866 301173 301283 2e-39 171  
gi|33285929|gb|AY223844.1| scaffold1089 100.00 35 0 0  
3174 3208 125565 125599 1e-07 65.8  
gi|33285929|gb|AY223844.1| scaffold1089 93.02 43 2 1 3167  
3208 7797 7839 1e-06 62.1  
gi|33285929|gb|AY223844.1| scaffold710 91.56 806 68 0 1675  
2480 340904 341709 0.0 1114  
gi|33285929|gb|AY223844.1| scaffold710 88.34 772 69 15 1700  
2459 341703 340941 0.0 907  
gi|33285929|gb|AY223844.1| scaffold710 98.57 280 4 0 2753  
3032 31235 31514 3e-137 496  
gi|33285929|gb|AY223844.1| scaffold710 97.88 283 6 0 2754  
3036 49142 48860 1e-135 490  
gi|33285929|gb|AY223844.1| scaffold710 98.22 281 2 3 2755  
3032 344139 344419 5e-135 488  
gi|33285929|gb|AY223844.1| scaffold710 98.54 274 4 0 2764  
3037 43705 43432 7e-134 484  
gi|33285929|gb|AY223844.1| scaffold710 97.15 281 6 2 2758  
3036 115145 115425 1e-130 473  
gi|33285929|gb|AY223844.1| scaffold710 97.04 270 8 0 2765  
3034 336429 336698 5e-125 455  
gi|33285929|gb|AY223844.1| scaffold710 92.31 247 16 3 1971  
2215 293958 293713 3e-93 350  
gi|33285929|gb|AY223844.1| scaffold710 97.12 139 3 1 2915  
3052 199028 199166 3e-58 233  
gi|33285929|gb|AY223844.1| scaffold710 82.20 264 26 15 1956  
2208 293713 293966 4e-51 209  
gi|33285929|gb|AY223844.1| scaffold710 96.97 99 3 0 2378  
2476 293399 293301 3e-38 167  
gi|33285929|gb|AY223844.1| scaffold710 95.06 81 3 1 1714  
1793 293319 293399 5e-26 126  
gi|33285929|gb|AY223844.1| scaffold710 92.05 88 3 4 2751  
2834 197949 198036 2e-24 121  
gi|33285929|gb|AY223844.1| scaffold710 89.89 89 9 0 2222  
2310 293491 293403 1e-22 115  
gi|33285929|gb|AY223844.1| scaffold710 100.00 33 0 0  
3174 3206 369420 369452 1e-06 62.1  
gi|33285929|gb|AY223844.1| scaffold641 91.94 794 64 0 1683  
2476 113454 114247 0.0 1114  
gi|33285929|gb|AY223844.1| scaffold641 88.10 773 69 17 1700  
2459 114245 113483 0.0 896  
gi|33285929|gb|AY223844.1| scaffold641 97.87 282 4 2 2757

3036 166829 166548 2e-134 486  
gi|33285929|gb|AY223844.1| scaffold641 100.00 106 0 0  
2932 3037 210009 209904 3e-47 196  
gi|33285929|gb|AY223844.1| scaffold641 94.95 99 2 2 2761  
2858 210129 210033 8e-34 152  
gi|33285929|gb|AY223844.1| scaffold578 91.66 803 67 0 1674  
2476 178684 177882 0.0 1114  
gi|33285929|gb|AY223844.1| scaffold578 91.59 797 56 5 1683  
2476 86867 86079 0.0 1092  
126  
gi|33285929|gb|AY223844.1| scaffold578 87.94 771 74 14 1700  
2459 177884 178646 0.0 893  
gi|33285929|gb|AY223844.1| scaffold578 86.92 772 75 15 1700  
2459 86081 86838 0.0 845  
gi|33285929|gb|AY223844.1| scaffold578 98.25 285 5 0 2751  
3035 225096 224812 2e-138 499  
gi|33285929|gb|AY223844.1| scaffold578 96.53 288 10 0 2753  
3040 143582 143295 1e-131 477  
gi|33285929|gb|AY223844.1| scaffold578 94.18 292 3 7 2755  
3042 117684 117965 2e-118 433  
gi|33285929|gb|AY223844.1| scaffold578 97.11 173 5 0 2801  
2973 26207 26035 4e-76 292  
gi|33285929|gb|AY223844.1| scaffold87 91.94 794 64 0 1683 2476  
541469 540676 0.0 1114  
gi|33285929|gb|AY223844.1| scaffold87 87.19 773 76 17 1700 2459  
540678 541440 0.0 859  
gi|33285929|gb|AY223844.1| scaffold87 99.29 280 2 0 2757 3036  
80088 80367 1e-140 507  
gi|33285929|gb|AY223844.1| scaffold87 97.91 287 2 4 2755 3037  
197946 197660 1e-136 494  
gi|33285929|gb|AY223844.1| scaffold87 95.97 298 9 3 2753 3049  
643078 642783 9e-133 481  
gi|33285929|gb|AY223844.1| scaffold87 97.44 273 7 0 2764 3036  
13454 13726 2e-128 466  
gi|33285929|gb|AY223844.1| scaffold87 94.08 287 7 4 2753 3037  
380367 380645 1e-116 427  
gi|33285929|gb|AY223844.1| scaffold87 94.14 273 5 5 2758 3029  
185983 186245 5e-110 405  
gi|33285929|gb|AY223844.1| scaffold87 98.16 217 3 1 2764 2979  
129982 130198 1e-101 377  
gi|33285929|gb|AY223844.1| scaffold87 97.16 176 4 1 2861 3035  
230681 230506 3e-77 296  
gi|33285929|gb|AY223844.1| scaffold87 85.89 248 25 7 2761 3005  
51483 51723 6e-65 255  
gi|33285929|gb|AY223844.1| scaffold87 98.88 89 1 0 2948 3036  
359048 358960 5e-36 159

gi|33285929|gb|AY223844.1| scaffold7935 91.83 796 65 0 1681  
2476 7843 7048 0.0 1112  
gi|33285929|gb|AY223844.1| scaffold7935 87.45 773 74 19 1700  
2459 7050 7812 0.0 869  
gi|33285929|gb|AY223844.1| scaffold7935 95.65 276 8 2 2764  
3039 64925 64654 1e-120 440  
gi|33285929|gb|AY223844.1| scaffold7935 99.28 138 1 0 2898  
3035 86681 86818 3e-63 250  
gi|33285929|gb|AY223844.1| scaffold5420 91.83 796 65 0 1681  
2476 26650 27445 0.0 1112  
gi|33285929|gb|AY223844.1| scaffold5420 90.03 782 70 8 1700  
2476 11333 10555 0.0 1007  
gi|33285929|gb|AY223844.1| scaffold5420 88.10 773 69 17 1700  
2459 27443 26681 0.0 896  
gi|33285929|gb|AY223844.1| scaffold5420 86.63 793 80 21 1700  
2478 10557 11337 0.0 854  
127  
gi|33285929|gb|AY223844.1| scaffold5286 91.74 799 66 0 1681  
2479 67409 68207 0.0 1112  
gi|33285929|gb|AY223844.1| scaffold5286 86.69 774 80 17 1700  
2460 68202 67439 0.0 837  
gi|33285929|gb|AY223844.1| scaffold4226 91.94 794 63 1 1683  
2476 100264 101056 0.0 1112  
gi|33285929|gb|AY223844.1| scaffold4226 88.43 769 69 15 1700  
2457 101054 100295 0.0 911  
gi|33285929|gb|AY223844.1| scaffold4226 97.51 201 4 1 2752  
2951 49193 49393 4e-91 342  
gi|33285929|gb|AY223844.1| scaffold3369 91.94 794 63 1 1683  
2476 23325 22533 0.0 1112  
gi|33285929|gb|AY223844.1| scaffold3369 87.24 768 85 10 1700  
2459 22535 23297 0.0 865  
gi|33285929|gb|AY223844.1| scaffold3369 99.30 285 2 0 2753  
3037 4147 3863 2e-143 516  
gi|33285929|gb|AY223844.1| scaffold3369 98.46 260 4 0 2751  
3010 140663 140404 4e-126 459  
gi|33285929|gb|AY223844.1| scaffold3369 92.68 287 18 3 2758  
3041 134129 133843 1e-111 411  
gi|33285929|gb|AY223844.1| scaffold1301 91.76 801 63 2 1683  
2480 216627 215827 0.0 1112  
gi|33285929|gb|AY223844.1| scaffold1301 88.33 771 68 15 1700  
2456 215833 216595 0.0 907  
gi|33285929|gb|AY223844.1| scaffold1301 97.54 284 4 2 2754  
3037 22417 22137 2e-133 483  
gi|33285929|gb|AY223844.1| scaffold1301 96.06 279 3 4 2758  
3034 47027 46755 9e-123 448  
gi|33285929|gb|AY223844.1| scaffold1301 92.96 284 7 6 2755

3036 43675 43947 7e-109 401  
gi|33285929|gb|AY223844.1| scaffold1301 94.93 138 5 2 2758  
2893 203581 203444 1e-52 215  
gi|33285929|gb|AY223844.1| scaffold1301 88.14 59 2 5 3155  
3208 240793 240735 1e-07 65.8  
gi|33285929|gb|AY223844.1| scaffold1301 96.88 32 1 0 3169  
3200 239814 239845 2e-04 54.7  
gi|33285929|gb|AY223844.1| scaffold231 91.94 794 63 1 1683  
2476 82418 83210 0.0 1112  
gi|33285929|gb|AY223844.1| scaffold231 90.69 795 72 2 1682  
2476 236531 235739 0.0 1059  
gi|33285929|gb|AY223844.1| scaffold231 90.45 796 63 3 1681  
2476 497834 498616 0.0 1038  
gi|33285929|gb|AY223844.1| scaffold231 88.73 754 70 9 1713  
2459 83192 82447 0.0 909  
gi|33285929|gb|AY223844.1| scaffold231 86.51 771 83 17 1700  
2459 235741 236501 0.0 830  
gi|33285929|gb|AY223844.1| scaffold231 85.60 771 79 15 1700  
2459 498614 497865 0.0 782  
gi|33285929|gb|AY223844.1| scaffold231 97.62 294 5 2 2745  
3036 70095 69802 2e-139 503  
gi|33285929|gb|AY223844.1| scaffold231 97.90 286 4 2 2751  
3036 269657 269374 1e-136 494  
128  
gi|33285929|gb|AY223844.1| scaffold231 97.89 284 6 0 2754  
3037 99717 100000 4e-136 492  
gi|33285929|gb|AY223844.1| scaffold231 98.53 273 4 0 2764  
3036 498811 499083 2e-133 483  
gi|33285929|gb|AY223844.1| scaffold231 97.20 286 6 2 2752  
3035 514311 514596 2e-133 483  
gi|33285929|gb|AY223844.1| scaffold231 98.18 274 5 0 2764  
3037 140086 140359 3e-132 479  
gi|33285929|gb|AY223844.1| scaffold231 97.19 285 4 4 2755  
3036 213161 212878 3e-132 479  
gi|33285929|gb|AY223844.1| scaffold231 96.83 284 5 1 2752  
3035 486952 487231 5e-130 472  
gi|33285929|gb|AY223844.1| scaffold231 96.81 282 6 3 2755  
3033 195326 195607 7e-129 468  
gi|33285929|gb|AY223844.1| scaffold231 98.66 149 2 0 2764  
2912 439710 439858 9e-68 265  
gi|33285929|gb|AY223844.1| scaffold231 83.66 153 25 0 2883  
3035 126705 126857 1e-31 145  
gi|33285929|gb|AY223844.1| scaffold231 93.75 64 4 0 2872  
2935 159713 159650 4e-17 97.1  
gi|33285929|gb|AY223844.1| scaffold231 100.00 34 0 0  
3174 3207 216347 216380 4e-07 63.9

gi|33285929|gb|AY223844.1| scaffold138 91.74 799 66 0 1681  
2479 506887 506089 0.0 1112  
gi|33285929|gb|AY223844.1| scaffold138 87.29 771 79 15 1700  
2459 506094 506856 0.0 865  
gi|33285929|gb|AY223844.1| scaffold138 97.86 280 5 1 2758  
3036 34550 34271 2e-133 483  
gi|33285929|gb|AY223844.1| scaffold138 97.86 280 5 1 2758  
3036 364259 363980 2e-133 483  
gi|33285929|gb|AY223844.1| scaffold138 91.94 273 10 3 2764  
3036 181113 180853 5e-100 372  
gi|33285929|gb|AY223844.1| scaffold138 85.39 89 12 1 2845  
2933 16228 16315 2e-15 91.6  
gi|33285929|gb|AY223844.1| scaffold138 100.00 29 0 0  
3172 3200 611882 611854 2e-04 54.7  
gi|33285929|gb|AY223844.1| scaffold95 91.86 799 60 4 1683 2479  
612885 613680 0.0 1112  
gi|33285929|gb|AY223844.1| scaffold95 87.47 758 72 17 1713 2459  
613659 612914 0.0 852  
gi|33285929|gb|AY223844.1| scaffold95 97.93 290 3 3 2750 3036  
654832 654543 2e-138 499  
gi|33285929|gb|AY223844.1| scaffold95 98.58 281 4 0 2758 3038  
461522 461242 9e-138 497  
gi|33285929|gb|AY223844.1| scaffold95 99.27 274 2 0 2764 3037  
332467 332194 3e-137 496  
gi|33285929|gb|AY223844.1| scaffold95 97.90 286 3 3 2754 3036  
657682 657397 4e-136 492  
gi|33285929|gb|AY223844.1| scaffold95 98.09 262 5 0 2775 3036  
4405 4144 1e-125 457  
gi|33285929|gb|AY223844.1| scaffold95 98.87 177 2 0 2860 3036  
286878 287054 3e-83 316  
129  
gi|33285929|gb|AY223844.1| scaffold95 97.74 177 3 1 2758 2933  
538225 538049 2e-79 303  
gi|33285929|gb|AY223844.1| scaffold95 98.57 140 2 0 2896 3035  
411512 411651 9e-63 248  
gi|33285929|gb|AY223844.1| scaffold95 94.19 155 7 2 2758 2910  
408065 408219 7e-59 235  
gi|33285929|gb|AY223844.1| scaffold95 98.18 110 0 2 2757 2864  
285398 285507 2e-45 191  
gi|33285929|gb|AY223844.1| scaffold95 100.00 83 0 0 2944  
3026 408219 408301 2e-34 154  
gi|33285929|gb|AY223844.1| scaffold7753 91.73 798 66 0 1683  
2480 72631 73428 0.0 1110  
gi|33285929|gb|AY223844.1| scaffold7753 87.63 768 82 11 1700  
2459 73422 72660 0.0 881  
gi|33285929|gb|AY223844.1| scaffold2827 91.75 800 63 3 1681

2478 35794 34996 0.0 1110  
gi|33285929|gb|AY223844.1| scaffold2827 88.14 767 79 10 1700  
2459 35000 35761 0.0 904  
gi|33285929|gb|AY223844.1| scaffold2827 99.29 283 2 0 2754  
3036 195525 195243 3e-142 512  
gi|33285929|gb|AY223844.1| scaffold2827 99.29 280 1 1 2755  
3034 200137 200415 5e-140 505  
gi|33285929|gb|AY223844.1| scaffold2827 98.58 281 2 2 2758  
3036 147490 147770 3e-137 496  
gi|33285929|gb|AY223844.1| scaffold2827 97.12 278 8 0 2758  
3035 109654 109931 2e-129 470  
gi|33285929|gb|AY223844.1| scaffold2827 94.37 284 14 2 2754  
3036 106914 106632 7e-119 435  
gi|33285929|gb|AY223844.1| scaffold2788 91.73 798 66 0 1683  
2480 74431 73634 0.0 1110  
gi|33285929|gb|AY223844.1| scaffold2788 88.38 749 71 10 1719  
2459 73662 74402 0.0 889  
gi|33285929|gb|AY223844.1| scaffold2788 92.21 398 31 0 2079  
2476 194438 194041 8e-158 564  
gi|33285929|gb|AY223844.1| scaffold2788 91.09 359 29 3 1700  
2055 194043 194401 2e-133 483  
gi|33285929|gb|AY223844.1| scaffold2788 97.18 284 6 2 2753  
3036 62615 62896 3e-132 479  
gi|33285929|gb|AY223844.1| scaffold2788 97.95 244 5 0 2751  
2994 74675 74432 1e-115 424  
gi|33285929|gb|AY223844.1| scaffold2788 100.00 48 0 0  
2987 3034 73637 73590 6e-15 89.8  
gi|33285929|gb|AY223844.1| scaffold2788 100.00 33 0 0  
3174 3206 201111 201143 1e-06 62.1  
gi|33285929|gb|AY223844.1| scaffold194 91.83 796 63 2 1683  
2476 115315 114520 0.0 1110  
gi|33285929|gb|AY223844.1| scaffold194 90.75 800 68 4 1683  
2476 127727 126928 0.0 1064  
gi|33285929|gb|AY223844.1| scaffold194 87.97 773 76 12 1700  
2459 126930 127698 0.0 898  
gi|33285929|gb|AY223844.1| scaffold194 88.13 758 70 13 1713  
2459 114538 115286 0.0 885  
130  
gi|33285929|gb|AY223844.1| scaffold194 97.56 287 4 3 2751  
3035 67842 68127 5e-135 488  
gi|33285929|gb|AY223844.1| scaffold194 97.89 284 2 4 2755  
3034 110175 109892 5e-135 488  
gi|33285929|gb|AY223844.1| scaffold194 98.54 274 4 0 2764  
3037 109737 109464 7e-134 484  
gi|33285929|gb|AY223844.1| scaffold194 97.80 273 5 1 2764  
3035 26940 26668 2e-129 470

gi|33285929|gb|AY223844.1| scaffold194 96.80 281 7 2 2758  
3036 412326 412046 7e-129 468  
gi|33285929|gb|AY223844.1| scaffold194 98.47 262 4 0 2776  
3037 110656 110395 3e-127 462  
gi|33285929|gb|AY223844.1| scaffold194 96.09 281 9 2 2758  
3036 167286 167566 1e-125 457  
gi|33285929|gb|AY223844.1| scaffold194 97.70 174 4 0 2758  
2931 85513 85686 3e-78 300  
gi|33285929|gb|AY223844.1| scaffold194 100.00 92 0 0  
2944 3035 363967 363876 2e-39 171  
gi|33285929|gb|AY223844.1| scaffold194 86.42 162 1 10 2755  
2896 27873 27713 2e-35 158  
gi|33285929|gb|AY223844.1| scaffold194 100.00 79 0 0  
2957 3035 3360 3282 4e-32 147  
gi|33285929|gb|AY223844.1| scaffold101 92.61 771 57 0 1683  
2453 223979 224749 0.0 1110  
gi|33285929|gb|AY223844.1| scaffold101 88.52 758 65 17 1713  
2459 224754 224008 0.0 900  
gi|33285929|gb|AY223844.1| scaffold101 98.95 286 0 3 2753  
3036 430810 430526 4e-141 508  
gi|33285929|gb|AY223844.1| scaffold101 99.63 272 1 0 2764  
3035 653192 652921 9e-138 497  
gi|33285929|gb|AY223844.1| scaffold101 98.22 281 3 2 2758  
3036 317386 317106 1e-135 490  
gi|33285929|gb|AY223844.1| scaffold101 97.86 281 4 2 2758  
3036 131547 131827 7e-134 484  
gi|33285929|gb|AY223844.1| scaffold101 96.89 289 5 4 2752  
3036 249732 249444 9e-133 481  
gi|33285929|gb|AY223844.1| scaffold101 96.49 285 7 3 2755  
3036 273223 272939 7e-129 468  
gi|33285929|gb|AY223844.1| scaffold101 95.82 287 8 4 2755  
3037 629625 629911 1e-126 460  
gi|33285929|gb|AY223844.1| scaffold101 95.52 290 3 5 2752  
3038 353952 354234 5e-125 455  
gi|33285929|gb|AY223844.1| scaffold101 93.93 280 8 3 2758  
3036 216952 216681 9e-113 414  
gi|33285929|gb|AY223844.1| scaffold101 97.38 229 2 4 2755  
2979 546410 546638 2e-104 387  
gi|33285929|gb|AY223844.1| scaffold101 97.96 196 2 2 2758  
2951 299376 299571 5e-90 339  
gi|33285929|gb|AY223844.1| scaffold101 88.07 285 20 11 2752  
3029 415022 414745 4e-86 326  
gi|33285929|gb|AY223844.1| scaffold101 96.64 149 3 2 2758  
2904 587257 587405 3e-62 246  
131  
gi|33285929|gb|AY223844.1| scaffold101 98.29 117 2 0 2788



2904 586624 586740 6e-50 206  
gi|33285929|gb|AY223844.1| scaffold101 92.25 129 1 3 2907  
3035 364809 364928 2e-40 174  
gi|33285929|gb|AY223844.1| scaffold101 94.00 100 6 0 2377  
2476 224750 224849 8e-34 152  
gi|33285929|gb|AY223844.1| scaffold101 90.82 98 6 3 1700  
1794 224847 224750 1e-26 128  
gi|33285929|gb|AY223844.1| scaffold101 100.00 56 0 0  
2754 2809 364749 364804 2e-19 104  
gi|33285929|gb|AY223844.1| scaffold83 91.73 798 66 0 1683 2480  
667730 668527 0.0 1110  
gi|33285929|gb|AY223844.1| scaffold83 91.22 763 64 3 1700 2459  
182249 181487 0.0 1037  
gi|33285929|gb|AY223844.1| scaffold83 88.29 803 76 12 1683 2476  
181458 182251 0.0 946  
gi|33285929|gb|AY223844.1| scaffold83 87.32 773 75 17 1700 2459  
668521 667759 0.0 863  
gi|33285929|gb|AY223844.1| scaffold83 91.75 473 39 0 1683 2155  
664476 664948 0.0 660  
gi|33285929|gb|AY223844.1| scaffold83 97.95 292 4 2 2751 3041  
382993 382703 5e-140 505  
gi|33285929|gb|AY223844.1| scaffold83 97.87 282 5 1 2755 3035  
641750 641469 2e-134 486  
gi|33285929|gb|AY223844.1| scaffold83 97.51 281 5 2 2758 3036  
330753 331033 3e-132 479  
gi|33285929|gb|AY223844.1| scaffold83 96.81 282 9 0 2755 3036  
570620 570339 5e-130 472  
gi|33285929|gb|AY223844.1| scaffold83 90.70 344 32 0 2116 2459  
664848 664505 4e-126 459  
gi|33285929|gb|AY223844.1| scaffold83 96.06 279 9 2 2758 3034  
210900 210622 2e-124 453  
gi|33285929|gb|AY223844.1| scaffold83 91.61 322 27 0 1927 2248  
440127 440448 9e-123 448  
gi|33285929|gb|AY223844.1| scaffold83 94.50 291 6 5 2752 3038  
32681 32397 1e-120 440  
gi|33285929|gb|AY223844.1| scaffold83 97.51 201 2 3 2753 2951  
171121 171320 2e-90 340  
gi|33285929|gb|AY223844.1| scaffold83 90.44 272 1 6 2764 3035  
237334 237088 7e-89 335  
gi|33285929|gb|AY223844.1| scaffold83 87.76 237 28 1 2241 2476  
440896 441132 4e-71 276  
gi|33285929|gb|AY223844.1| scaffold83 86.81 235 27 4 1700 1930  
441130 440896 4e-66 259  
gi|33285929|gb|AY223844.1| scaffold83 87.89 190 21 2 1687 1874  
146002 146191 6e-55 222  
gi|33285929|gb|AY223844.1| scaffold83 92.36 157 3 1 2824 2980

567702 567849 1e-52 215  
gi|33285929|gb|AY223844.1| scaffold83 95.87 121 4 1 2755 2874  
641943 641823 1e-46 195  
gi|33285929|gb|AY223844.1| scaffold83 95.45 110 3 2 2941 3049  
187738 187630 2e-40 174  
132  
gi|33285929|gb|AY223844.1| scaffold83 97.94 97 2 0 2940 3036  
137311 137407 8e-39 169  
gi|33285929|gb|AY223844.1| scaffold83 98.63 73 1 0 2961 3033  
171556 171628 4e-27 130  
gi|33285929|gb|AY223844.1| scaffold83 83.47 121 16 3 2913 3033  
665377 665261 5e-21 110  
gi|33285929|gb|AY223844.1| scaffold13868 91.83 796 62 2 1681  
2476 25865 25073 0.0 1109  
gi|33285929|gb|AY223844.1| scaffold13868 86.29 773 80 19 1700  
2459 25075 25834 0.0 817  
gi|33285929|gb|AY223844.1| scaffold11057 92.41 777 57 2 1683  
2458 40358 39583 0.0 1109  
gi|33285929|gb|AY223844.1| scaffold11057 88.65 758 64 16 1713  
2459 39583 40329 0.0 904  
gi|33285929|gb|AY223844.1| scaffold9969 91.35 809 70 0 1676  
2484 33064 33872 0.0 1109  
gi|33285929|gb|AY223844.1| scaffold9969 87.47 774 72 19 1700  
2459 33862 33100 0.0 869  
gi|33285929|gb|AY223844.1| scaffold9969 93.14 306 21 0 2166  
2471 49025 49330 2e-123 449  
gi|33285929|gb|AY223844.1| scaffold9969 91.78 304 23 2 1704  
2005 49328 49025 5e-115 422  
gi|33285929|gb|AY223844.1| scaffold9969 94.46 271 9 3 2760  
3030 16228 16492 3e-112 412  
gi|33285929|gb|AY223844.1| scaffold8670 91.82 795 63 2 1683  
2476 1099 306 0.0 1109  
gi|33285929|gb|AY223844.1| scaffold8670 87.26 769 74 18 1704  
2459 313 1070 0.0 856  
gi|33285929|gb|AY223844.1| scaffold8670 98.53 272 4 0 2764  
3035 58475 58746 9e-133 481  
gi|33285929|gb|AY223844.1| scaffold8670 100.00 98 0 0  
2918 3015 37029 36932 1e-42 182  
gi|33285929|gb|AY223844.1| scaffold7738 91.36 810 69 1 1675  
2483 56258 57067 0.0 1109  
gi|33285929|gb|AY223844.1| scaffold7738 87.44 772 77 14 1700  
2459 57058 56295 0.0 872  
gi|33285929|gb|AY223844.1| scaffold7738 100.00 35 0 0  
3174 3208 72564 72598 1e-07 65.8  
gi|33285929|gb|AY223844.1| scaffold7738 100.00 28 0 0  
3172 3199 73394 73367 8e-04 52.8

gi|33285929|gb|AY223844.1| scaffold6061 92.91 762 52 2 1681  
2441 89956 90716 0.0 1109  
gi|33285929|gb|AY223844.1| scaffold6061 88.77 739 65 12 1730  
2459 90716 89987 0.0 891  
gi|33285929|gb|AY223844.1| scaffold6061 91.81 464 36 2 1915  
2377 40753 41215 0.0 647  
gi|33285929|gb|AY223844.1| scaffold6061 97.94 291 5 1 2749  
3038 38324 38614 2e-139 503  
gi|33285929|gb|AY223844.1| scaffold6061 97.19 285 5 3 2755  
3036 45249 45533 3e-132 479  
gi|33285929|gb|AY223844.1| scaffold6061 96.52 287 7 3 2756  
3040 52080 52365 5e-130 472  
133  
gi|33285929|gb|AY223844.1| scaffold6061 84.32 472 56 13 1794  
2256 41215 40753 9e-123 448  
gi|33285929|gb|AY223844.1| scaffold6061 89.86 207 21 0 2251  
2457 39530 39324 3e-68 267  
gi|33285929|gb|AY223844.1| scaffold5274 91.86 799 56 5 1683  
2479 35971 36762 0.0 1109  
gi|33285929|gb|AY223844.1| scaffold5274 91.83 796 59 5 1683  
2476 33943 33152 0.0 1107  
gi|33285929|gb|AY223844.1| scaffold5274 87.85 757 67 16 1713  
2459 36741 36000 0.0 865  
gi|33285929|gb|AY223844.1| scaffold5274 87.71 757 71 16 1713  
2459 33170 33914 0.0 863  
gi|33285929|gb|AY223844.1| scaffold5274 97.16 282 5 3 2755  
3033 79699 79980 1e-130 473  
gi|33285929|gb|AY223844.1| scaffold5274 97.81 274 4 2 2758  
3029 62608 62335 5e-130 472  
gi|33285929|gb|AY223844.1| scaffold4849 91.27 813 70 1 1672  
2483 56310 55498 0.0 1109  
gi|33285929|gb|AY223844.1| scaffold4849 86.53 772 84 15 1700  
2459 55507 56270 0.0 833  
gi|33285929|gb|AY223844.1| scaffold4849 97.17 283 7 1 2755  
3036 50618 50336 1e-131 477  
gi|33285929|gb|AY223844.1| scaffold3438 91.81 794 65 0 1683  
2476 17035 17828 0.0 1109  
gi|33285929|gb|AY223844.1| scaffold3438 87.84 773 71 17 1700  
2459 17826 17064 0.0 885  
gi|33285929|gb|AY223844.1| scaffold3438 97.94 291 4 2 2752  
3040 13227 12937 2e-139 503  
gi|33285929|gb|AY223844.1| scaffold3438 91.61 310 26 0 2167  
2476 33438 33747 3e-117 429  
gi|33285929|gb|AY223844.1| scaffold3438 90.91 308 25 3 1700  
2004 33745 33438 1e-111 411  
gi|33285929|gb|AY223844.1| scaffold3297 91.82 795 64 1 1683

2476 90153 90947 0.0 1109  
gi|33285929|gb|AY223844.1| scaffold3297 90.81 794 64 5 1683  
2476 103062 103846 0.0 1055  
gi|33285929|gb|AY223844.1| scaffold3297 87.94 771 74 13 1700  
2459 90945 90183 0.0 893  
gi|33285929|gb|AY223844.1| scaffold3297 87.00 769 72 16 1700  
2457 103844 103093 0.0 843  
gi|33285929|gb|AY223844.1| scaffold3297 97.95 292 5 1 2751  
3042 70764 70474 5e-140 505  
gi|33285929|gb|AY223844.1| scaffold3297 96.32 299 8 2 2751  
3046 10994 11292 5e-135 488  
gi|33285929|gb|AY223844.1| scaffold2945 91.82 795 63 2 1683  
2476 83365 84158 0.0 1109  
gi|33285929|gb|AY223844.1| scaffold2945 86.92 772 80 15 1700  
2459 84156 83394 0.0 848  
gi|33285929|gb|AY223844.1| scaffold2945 98.91 275 2 1 2761  
3035 35771 36044 1e-135 490  
gi|33285929|gb|AY223844.1| scaffold2945 97.51 281 5 2 2758  
3036 169338 169618 3e-132 479  
134  
gi|33285929|gb|AY223844.1| scaffold2945 97.05 271 7 1 2760  
3029 273966 274236 5e-125 455  
gi|33285929|gb|AY223844.1| scaffold2945 95.39 282 7 3 2758  
3033 170385 170666 1e-121 444  
gi|33285929|gb|AY223844.1| scaffold2945 97.27 256 7 0 2755  
3010 181310 181565 7e-119 435  
gi|33285929|gb|AY223844.1| scaffold2866 91.82 795 64 1 1683  
2476 145531 146325 0.0 1109  
gi|33285929|gb|AY223844.1| scaffold2866 87.58 773 74 16 1700  
2459 146323 145560 0.0 876  
gi|33285929|gb|AY223844.1| scaffold2866 98.19 276 3 2 2757  
3031 175774 175500 9e-133 481  
gi|33285929|gb|AY223844.1| scaffold2866 97.65 170 4 0 2869  
3038 109461 109630 4e-76 292  
gi|33285929|gb|AY223844.1| scaffold2866 87.10 186 21 2 2854  
3036 176371 176186 2e-50 207  
gi|33285929|gb|AY223844.1| scaffold2318 91.81 794 65 0 1683  
2476 118965 119758 0.0 1109  
gi|33285929|gb|AY223844.1| scaffold2318 87.81 771 71 19 1700  
2457 119756 118996 0.0 881  
gi|33285929|gb|AY223844.1| scaffold2318 98.59 283 4 0 2754  
3036 120833 121115 7e-139 501  
gi|33285929|gb|AY223844.1| scaffold2318 98.58 282 3 1 2755  
3035 97942 98223 9e-138 497  
gi|33285929|gb|AY223844.1| scaffold2318 97.51 281 7 0 2755  
3035 124681 124961 9e-133 481

gi|33285929|gb|AY223844.1| scaffold2046 91.74 799 63 1 1683  
2478 188755 189553 0.0 1109  
gi|33285929|gb|AY223844.1| scaffold2046 86.73 776 77 19 1700  
2459 189549 188784 0.0 839  
gi|33285929|gb|AY223844.1| scaffold2046 96.92 292 6 3 2752  
3040 14302 14011 2e-134 486  
gi|33285929|gb|AY223844.1| scaffold2046 98.53 272 4 0 2764  
3035 124017 124288 9e-133 481  
gi|33285929|gb|AY223844.1| scaffold1157 91.45 807 67 2 1677  
2482 250470 251275 0.0 1109  
gi|33285929|gb|AY223844.1| scaffold1157 87.16 771 80 13 1700  
2459 251268 250506 0.0 859  
gi|33285929|gb|AY223844.1| scaffold1157 98.60 285 2 2 2751  
3035 283677 283959 2e-139 503  
gi|33285929|gb|AY223844.1| scaffold1157 91.26 366 29 1 2119  
2481 66409 66774 3e-137 496  
gi|33285929|gb|AY223844.1| scaffold1157 90.42 355 28 4 1700  
2048 66767 66413 3e-127 462  
gi|33285929|gb|AY223844.1| scaffold1157 97.14 140 2 1 2758  
2895 122550 122411 7e-59 235  
gi|33285929|gb|AY223844.1| scaffold1157 99.11 112 1 0 2891  
3002 118576 118465 7e-49 202  
gi|33285929|gb|AY223844.1| scaffold952 91.81 794 65 0 1683  
2476 77175 77968 0.0 1109  
gi|33285929|gb|AY223844.1| scaffold952 87.91 769 72 14 1700  
2456 77966 77207 0.0 887  
135  
gi|33285929|gb|AY223844.1| scaffold952 97.20 286 7 1 2751  
3035 179842 180127 2e-133 483  
gi|33285929|gb|AY223844.1| scaffold952 97.85 279 4 2 2758  
3036 70485 70761 9e-133 481  
gi|33285929|gb|AY223844.1| scaffold952 97.15 281 6 2 2758  
3036 261866 261586 1e-130 473  
gi|33285929|gb|AY223844.1| scaffold952 94.70 283 10 4 2760  
3037 111718 111436 7e-119 435  
gi|33285929|gb|AY223844.1| scaffold952 91.07 291 15 4 2751  
3036 341981 342265 2e-103 383  
gi|33285929|gb|AY223844.1| scaffold162 91.77 802 57 5 1681  
2476 318926 319724 0.0 1109  
gi|33285929|gb|AY223844.1| scaffold162 87.77 777 67 17 1700  
2459 319722 318957 0.0 885  
gi|33285929|gb|AY223844.1| scaffold162 91.92 433 33 2 2045  
2476 129294 128863 1e-170 606  
gi|33285929|gb|AY223844.1| scaffold162 97.27 293 6 2 2750  
3041 463778 464069 3e-137 496  
gi|33285929|gb|AY223844.1| scaffold162 91.64 359 27 3 1700

2055 128865 129223 1e-136 494  
gi|33285929|gb|AY223844.1| scaffold162 97.88 283 5 1 2754  
3036 209193 208912 5e-135 488  
gi|33285929|gb|AY223844.1| scaffold162 98.19 277 4 1 2758  
3033 491763 492039 2e-133 483  
gi|33285929|gb|AY223844.1| scaffold162 95.96 297 10 2 2748  
3044 416188 415894 9e-133 481  
gi|33285929|gb|AY223844.1| scaffold162 97.17 283 7 1 2755  
3036 477676 477394 1e-131 477  
gi|33285929|gb|AY223844.1| scaffold162 98.11 265 5 0 2756  
3020 379392 379656 3e-127 462  
gi|33285929|gb|AY223844.1| scaffold162 96.10 282 9 2 2755  
3034 78052 77771 4e-126 459  
gi|33285929|gb|AY223844.1| scaffold162 96.34 273 9 1 2764  
3036 200530 200801 9e-123 448  
gi|33285929|gb|AY223844.1| scaffold162 98.35 243 2 2 2756  
2996 21532 21774 4e-116 425  
gi|33285929|gb|AY223844.1| scaffold162 97.84 139 3 0 2751  
2889 396525 396663 2e-60 241  
gi|33285929|gb|AY223844.1| scaffold162 97.62 126 3 0 2911  
3036 88926 88801 3e-53 217  
gi|33285929|gb|AY223844.1| scaffold162 100.00 106 0 0  
2931 3036 396664 396769 3e-47 196  
gi|33285929|gb|AY223844.1| scaffold162 100.00 92 0 0  
2945 3036 104677 104586 2e-39 171  
gi|33285929|gb|AY223844.1| scaffold2 91.73 798 64 2 1683 2479  
922232 923028 0.0 1109  
gi|33285929|gb|AY223844.1| scaffold2 89.52 811 70 5 1674 2484  
1181070 1180275 0.0 1014  
gi|33285929|gb|AY223844.1| scaffold2 88.34 772 69 15 1700 2459  
923023 922261 0.0 907  
gi|33285929|gb|AY223844.1| scaffold2 85.90 773 71 22 1700 2459  
1180285 1181032 0.0 789  
136  
gi|33285929|gb|AY223844.1| scaffold2 98.60 285 4 0 2751 3035  
213936 214220 5e-140 505  
gi|33285929|gb|AY223844.1| scaffold2 98.22 281 4 1 2761 3040  
547454 547734 1e-135 490  
gi|33285929|gb|AY223844.1| scaffold2 97.57 288 4 3 2752 3037  
980724 981010 1e-135 490  
gi|33285929|gb|AY223844.1| scaffold2 98.56 277 3 1 2758 3033  
287220 287496 5e-135 488  
gi|33285929|gb|AY223844.1| scaffold2 97.21 287 6 2 2758 3042  
774617 774903 7e-134 484  
gi|33285929|gb|AY223844.1| scaffold2 97.17 283 7 1 2755 3036  
1088308 1088026 1e-131 477

gi|33285929|gb|AY223844.1| scaffold2 98.16 272 5 0 2764 3035  
67826 67555 4e-131 475  
gi|33285929|gb|AY223844.1| scaffold2 97.49 279 6 1 2758 3035  
73640 73362 4e-131 475  
gi|33285929|gb|AY223844.1| scaffold2 97.16 282 4 3 2758 3037  
939375 939096 1e-130 473  
gi|33285929|gb|AY223844.1| scaffold2 96.82 283 6 3 2758 3037  
619151 618869 2e-129 470  
gi|33285929|gb|AY223844.1| scaffold2 96.42 279 8 2 2755 3031  
646485 646763 4e-126 459  
gi|33285929|gb|AY223844.1| scaffold2 95.49 288 9 4 2752 3035  
640340 640053 1e-125 457  
gi|33285929|gb|AY223844.1| scaffold2 95.02 281 12 2 2758 3036  
253988 253708 1e-120 440  
gi|33285929|gb|AY223844.1| scaffold2 94.41 286 10 5 2758 3037  
748654 748369 7e-119 435  
gi|33285929|gb|AY223844.1| scaffold2 91.13 293 15 4 2751 3038  
512931 513217 2e-104 387  
gi|33285929|gb|AY223844.1| scaffold2 90.41 292 4 14 2751 3036  
1040498 1040225 3e-97 363  
gi|33285929|gb|AY223844.1| scaffold2 96.15 208 6 2 2758 2964  
177882 177676 5e-90 339  
gi|33285929|gb|AY223844.1| scaffold2 96.43 84 3 0 3207 3290  
169122 169039 6e-30 139  
gi|33285929|gb|AY223844.1| scaffold2 94.12 51 3 0 2841 2891  
794219 794269 1e-11 78.7  
gi|33285929|gb|AY223844.1| scaffold2 100.00 33 0 0 3174  
3206 153839 153807 1e-06 62.1  
gi|33285929|gb|AY223844.1| scaffold4 91.72 797 66 0 1683 2479  
932570 931774 0.0 1109  
gi|33285929|gb|AY223844.1| scaffold4 89.99 819 61 10 1683 2480  
631107 631925 0.0 1040  
gi|33285929|gb|AY223844.1| scaffold4 88.96 752 65 12 1717 2459  
931799 932541 0.0 915  
gi|33285929|gb|AY223844.1| scaffold4 86.17 788 77 20 1700 2459  
631919 631136 0.0 824  
gi|33285929|gb|AY223844.1| scaffold4 98.95 286 1 2 2755 3038  
50577 50292 1e-141 510  
gi|33285929|gb|AY223844.1| scaffold4 98.60 286 4 0 2751 3036  
247599 247314 1e-140 507  
137  
gi|33285929|gb|AY223844.1| scaffold4 98.27 289 4 1 2751 3038  
762963 763251 5e-140 505  
gi|33285929|gb|AY223844.1| scaffold4 97.93 290 3 2 2753 3040  
267727 268015 2e-138 499  
gi|33285929|gb|AY223844.1| scaffold4 97.59 290 3 4 2750 3036

903771 903483 1e-136 494  
gi|33285929|gb|AY223844.1| scaffold4 98.57 279 3 1 2758 3035  
821498 821220 4e-136 492  
gi|33285929|gb|AY223844.1| scaffold4 96.94 294 5 4 2748 3037  
382664 382957 1e-135 490  
gi|33285929|gb|AY223844.1| scaffold4 98.18 274 5 0 2764 3037  
141494 141221 3e-132 479  
gi|33285929|gb|AY223844.1| scaffold4 97.49 279 7 0 2757 3035  
926703 926981 1e-131 477  
gi|33285929|gb|AY223844.1| scaffold4 96.84 285 6 3 2758 3040  
1033878 1033595 1e-130 473  
gi|33285929|gb|AY223844.1| scaffold4 97.11 277 7 1 2764 3040  
353106 353381 2e-128 466  
gi|33285929|gb|AY223844.1| scaffold4 96.03 277 9 2 2761 3035  
667271 666995 2e-123 449  
gi|33285929|gb|AY223844.1| scaffold4 96.88 256 5 3 2752 3005  
287058 287312 4e-116 425  
gi|33285929|gb|AY223844.1| scaffold4 98.72 234 3 0 2764 2997  
613816 614049 2e-113 416  
gi|33285929|gb|AY223844.1| scaffold4 92.39 276 11 8 2764 3036  
660177 659909 7e-104 385  
gi|33285929|gb|AY223844.1| scaffold4 90.46 283 1 9 2758 3038  
410140 409882 3e-93 350  
gi|33285929|gb|AY223844.1| scaffold4 97.96 196 4 0 2765 2960  
1043923 1043728 2e-90 340  
gi|33285929|gb|AY223844.1| scaffold4 97.03 202 5 1 2835 3035  
380066 380267 5e-90 339  
gi|33285929|gb|AY223844.1| scaffold4 97.00 200 5 1 2754 2952  
614607 614408 7e-89 335  
gi|33285929|gb|AY223844.1| scaffold4 88.03 284 4 15 2758 3038  
188002 187746 4e-81 309  
gi|33285929|gb|AY223844.1| scaffold4 89.09 110 5 6 2751 2854  
379470 379578 4e-27 130  
gi|33285929|gb|AY223844.1| scaffold4 91.57 83 7 0 2829 2911  
1034692 1034774 1e-22 115  
gi|33285929|gb|AY223844.1| scaffold4 93.44 61 4 0 2750 2810  
605643 605703 2e-15 91.6  
gi|33285929|gb|AY223844.1| scaffold4 100.00 49 0 0 2988  
3036 1043727 1043679 2e-15 91.6  
gi|33285929|gb|AY223844.1| scaffold4 97.67 43 1 0 2994 3036  
605709 605751 2e-10 75.0  
gi|33285929|gb|AY223844.1| scaffold7293 91.71 796 66 0 1681  
2476 34753 33958 0.0 1107  
gi|33285929|gb|AY223844.1| scaffold7293 88.17 769 76 13 1700  
2459 33960 34722 0.0 904  
gi|33285929|gb|AY223844.1| scaffold7243 91.71 796 66 0 1681



2476 23248 22453 0.0 1107  
138  
gi|33285929|gb|AY223844.1| scaffold7243 87.84 773 71 19 1700  
2459 22455 23217 0.0 885  
gi|33285929|gb|AY223844.1| scaffold7243 96.91 194 5 1 2836  
3028 9300 9107 2e-85 324  
gi|33285929|gb|AY223844.1| scaffold7243 97.50 160 4 0 2877  
3036 23247 23406 2e-70 274  
gi|33285929|gb|AY223844.1| scaffold7243 89.63 135 8 4 2751  
2884 22323 22452 3e-38 167  
gi|33285929|gb|AY223844.1| scaffold6864 91.71 796 66 0 1681  
2476 86838 87633 0.0 1107  
gi|33285929|gb|AY223844.1| scaffold6864 88.20 771 72 15 1700  
2459 87631 86869 0.0 904  
gi|33285929|gb|AY223844.1| scaffold6864 97.57 288 5 2 2751  
3037 84716 85002 4e-136 492  
gi|33285929|gb|AY223844.1| scaffold6864 86.18 246 33 1 2758  
3002 43172 43417 9e-68 265  
gi|33285929|gb|AY223844.1| scaffold4919 91.71 796 66 0 1681  
2476 46144 46939 0.0 1107  
gi|33285929|gb|AY223844.1| scaffold4919 87.44 772 76 18 1700  
2459 46937 46175 0.0 869  
gi|33285929|gb|AY223844.1| scaffold4919 97.40 308 4 4 2748  
3053 9058 8753 5e-145 521  
gi|33285929|gb|AY223844.1| scaffold4919 100.00 273 0 0  
2764 3036 138498 138226 5e-140 505  
gi|33285929|gb|AY223844.1| scaffold4919 92.23 309 5 9 2747  
3036 43300 43608 2e-114 420  
gi|33285929|gb|AY223844.1| scaffold3854 91.71 796 66 0 1681  
2476 134751 135546 0.0 1107  
gi|33285929|gb|AY223844.1| scaffold3854 87.68 771 72 16 1700  
2457 135544 134784 0.0 878  
gi|33285929|gb|AY223844.1| scaffold3854 98.17 273 3 1 2764  
3036 17561 17291 4e-131 475  
gi|33285929|gb|AY223844.1| scaffold3854 94.61 241 11 2 2806  
3045 160278 160039 5e-100 372  
gi|33285929|gb|AY223844.1| scaffold3854 98.94 94 1 0 2943  
3036 50548 50455 8e-39 169  
gi|33285929|gb|AY223844.1| scaffold3854 100.00 35 0 0  
3174 3208 47741 47707 1e-07 65.8  
gi|33285929|gb|AY223844.1| scaffold3854 100.00 33 0 0  
3174 3206 17092 17060 1e-06 62.1  
gi|33285929|gb|AY223844.1| scaffold1583 92.19 781 61 0 1679  
2459 126656 125876 0.0 1107  
gi|33285929|gb|AY223844.1| scaffold1583 87.90 785 78 12 1683  
2459 125848 126623 0.0 909

gi|33285929|gb|AY223844.1| scaffold1583 98.57 280 4 0 2751  
3030 173538 173259 3e-137 496  
gi|33285929|gb|AY223844.1| scaffold1583 98.56 277 2 2 2758  
3032 260545 260821 5e-135 488  
gi|33285929|gb|AY223844.1| scaffold1583 96.19 289 3 7 2755  
3035 156800 157088 2e-128 466  
gi|33285929|gb|AY223844.1| scaffold1583 90.38 104 10 0 2821  
2924 108700 108803 2e-29 137  
139  
gi|33285929|gb|AY223844.1| scaffold850 91.73 798 63 3 1683  
2478 175733 176529 0.0 1107  
gi|33285929|gb|AY223844.1| scaffold850 91.07 795 69 2 1683  
2476 275830 275037 0.0 1075  
gi|33285929|gb|AY223844.1| scaffold850 88.08 772 72 14 1700  
2459 176525 175762 0.0 900  
gi|33285929|gb|AY223844.1| scaffold850 87.58 789 76 17 1700  
2477 275039 275816 0.0 896  
gi|33285929|gb|AY223844.1| scaffold850 99.62 266 1 0 2771  
3036 152014 152279 2e-134 486  
gi|33285929|gb|AY223844.1| scaffold850 98.16 272 5 0 2764  
3035 40236 40507 4e-131 475  
gi|33285929|gb|AY223844.1| scaffold850 96.80 281 7 2 2757  
3035 262789 262509 7e-129 468  
gi|33285929|gb|AY223844.1| scaffold850 96.42 279 9 1 2758  
3035 19203 18925 4e-126 459  
gi|33285929|gb|AY223844.1| scaffold850 95.76 283 9 3 2755  
3035 87555 87274 2e-124 453  
gi|33285929|gb|AY223844.1| scaffold850 98.04 255 3 2 2758  
3010 291717 291463 4e-121 442  
gi|33285929|gb|AY223844.1| scaffold850 96.08 204 6 2 2756  
2957 350117 350320 9e-88 331  
gi|33285929|gb|AY223844.1| scaffold850 100.00 119 0 0  
2920 3038 350321 350439 2e-54 220  
gi|33285929|gb|AY223844.1| scaffold850 98.98 98 1 0 2764  
2861 63841 63744 5e-41 176  
gi|33285929|gb|AY223844.1| scaffold787 91.61 799 67 0 1681  
2479 135286 134488 0.0 1107  
gi|33285929|gb|AY223844.1| scaffold787 88.20 771 72 14 1700  
2459 134493 135255 0.0 904  
gi|33285929|gb|AY223844.1| scaffold787 92.02 351 26 2 1679  
2028 258232 258581 4e-136 492  
gi|33285929|gb|AY223844.1| scaffold787 97.19 285 5 3 2755  
3036 243986 244270 3e-132 479  
gi|33285929|gb|AY223844.1| scaffold787 93.35 316 19 2 2143  
2457 258581 258267 2e-128 466  
gi|33285929|gb|AY223844.1| scaffold787 90.88 285 4 7 2751

3035 112927 113189 3e-97 363  
gi|33285929|gb|AY223844.1| scaffold787 90.27 257 25 0 2227  
2483 258886 259142 2e-89 337  
gi|33285929|gb|AY223844.1| scaffold787 89.11 248 24 3 1700  
1944 259133 258886 6e-80 305  
gi|33285929|gb|AY223844.1| scaffold787 100.00 88 0 0  
2948 3035 113191 113278 4e-37 163  
gi|33285929|gb|AY223844.1| scaffold22 91.81 794 64 1 1683 2476  
280202 280994 0.0 1107  
gi|33285929|gb|AY223844.1| scaffold22 86.85 768 81 14 1700 2456  
280992 280234 0.0 843  
gi|33285929|gb|AY223844.1| scaffold22 97.88 283 6 0 2755 3037  
137798 138080 1e-135 490  
gi|33285929|gb|AY223844.1| scaffold22 98.90 272 3 0 2764 3035  
307257 307528 2e-134 486  
140  
gi|33285929|gb|AY223844.1| scaffold22 98.19 277 5 0 2754 3030  
714415 714139 7e-134 484  
gi|33285929|gb|AY223844.1| scaffold22 97.18 284 8 0 2751 3034  
514652 514369 9e-133 481  
gi|33285929|gb|AY223844.1| scaffold22 97.51 281 5 2 2757 3036  
691480 691759 3e-132 479  
gi|33285929|gb|AY223844.1| scaffold22 96.81 282 5 3 2755 3035  
619118 619396 7e-129 468  
gi|33285929|gb|AY223844.1| scaffold22 97.38 267 5 2 2761 3026  
569456 569721 2e-124 453  
gi|33285929|gb|AY223844.1| scaffold22 93.23 251 9 3 2763 3013  
628551 628793 3e-97 363  
gi|33285929|gb|AY223844.1| scaffold22 97.14 210 6 0 2827 3036  
331423 331214 5e-95 355  
gi|33285929|gb|AY223844.1| scaffold22 97.96 196 4 0 2835 3030  
442850 443045 2e-90 340  
gi|33285929|gb|AY223844.1| scaffold22 99.37 159 1 0 2878 3036  
229751 229593 6e-75 289  
gi|33285929|gb|AY223844.1| scaffold22 89.10 211 13 6 2748 2955  
832135 831932 2e-64 254  
gi|33285929|gb|AY223844.1| scaffold22 88.63 211 15 5 2748 2955  
830716 830920 9e-63 248  
gi|33285929|gb|AY223844.1| scaffold22 94.66 131 2 5 2751 2877  
265981 266110 1e-47 198  
gi|33285929|gb|AY223844.1| scaffold22 94.19 86 3 2 2754 2837  
436384 436469 4e-27 130  
gi|33285929|gb|AY223844.1| scaffold22 82.44 131 19 4 2766 2895  
847016 847143 1e-21 111  
gi|33285929|gb|AY223844.1| scaffold22 84.62 104 15 1 2790 2893  
329895 329997 8e-19 102

gi|33285929|gb|AY223844.1| scaffold14700 91.60 798 67 0 1683  
2480 21832 22629 0.0 1105  
gi|33285929|gb|AY223844.1| scaffold14700 87.35 775 71 21 1700  
2459 22623 21861 0.0 863  
gi|33285929|gb|AY223844.1| scaffold10589 93.32 748 48 2 1713  
2459 48109 48855 0.0 1105  
gi|33285929|gb|AY223844.1| scaffold10589 88.89 819 69 16 1674  
2481 48893 48086 0.0 989  
gi|33285929|gb|AY223844.1| scaffold7022 91.71 796 64 2 1683  
2476 31383 30588 0.0 1105  
gi|33285929|gb|AY223844.1| scaffold7022 86.45 782 85 16 1700  
2469 30590 31362 0.0 839  
gi|33285929|gb|AY223844.1| scaffold7022 97.74 221 3 2 2758  
2976 13214 13434 3e-102 379  
gi|33285929|gb|AY223844.1| scaffold6808 91.73 798 61 4 1681  
2476 45446 46240 0.0 1105  
gi|33285929|gb|AY223844.1| scaffold6808 87.27 754 81 9 1713  
2459 46222 45477 0.0 846  
gi|33285929|gb|AY223844.1| scaffold6808 99.27 137 1 0 2899  
3035 36756 36892 9e-63 248  
gi|33285929|gb|AY223844.1| scaffold3766 91.62 800 63 2 1681  
2476 33987 33188 0.0 1105  
141  
gi|33285929|gb|AY223844.1| scaffold3766 87.77 777 68 19 1700  
2459 33190 33956 0.0 883  
gi|33285929|gb|AY223844.1| scaffold3766 98.92 277 3 0 2759  
3035 74036 74312 3e-137 496  
gi|33285929|gb|AY223844.1| scaffold3766 96.81 282 7 2 2757  
3036 88933 88652 2e-129 470  
gi|33285929|gb|AY223844.1| scaffold3766 98.00 100 2 0 2940  
3039 152032 152131 2e-40 174  
gi|33285929|gb|AY223844.1| scaffold3766 94.25 87 5 0 2754  
2840 151692 151778 3e-28 134  
gi|33285929|gb|AY223844.1| scaffold3766 97.40 77 2 0 2825  
2901 151960 152036 1e-27 132  
gi|33285929|gb|AY223844.1| scaffold3287 91.71 796 64 1 1683  
2478 119677 120470 0.0 1105  
gi|33285929|gb|AY223844.1| scaffold3287 88.38 757 66 15 1713  
2459 120450 119706 0.0 891  
gi|33285929|gb|AY223844.1| scaffold3287 98.57 280 2 2 2758  
3035 184651 184930 1e-136 494  
gi|33285929|gb|AY223844.1| scaffold3287 91.70 277 7 7 2760  
3035 44112 43851 2e-99 370  
gi|33285929|gb|AY223844.1| scaffold3287 97.78 135 3 0 2902  
3036 6002 5868 3e-58 233  
gi|33285929|gb|AY223844.1| scaffold2051 91.60 798 67 0 1683

2480 168718 167921 0.0 1105  
gi|33285929|gb|AY223844.1| scaffold2051 87.19 773 76 17 1700  
2459 167927 168689 0.0 857  
gi|33285929|gb|AY223844.1| scaffold2051 97.18 284 6 2 2755  
3036 42522 42805 3e-132 479  
gi|33285929|gb|AY223844.1| scaffold2051 97.16 282 8 0 2754  
3035 111951 112232 1e-131 477  
gi|33285929|gb|AY223844.1| scaffold2051 97.13 279 3 3 2758  
3035 39114 38840 2e-128 466  
gi|33285929|gb|AY223844.1| scaffold2051 95.07 284 11 1 2751  
3034 71555 71275 1e-121 444  
gi|33285929|gb|AY223844.1| scaffold2051 97.86 234 4 1 2761  
2993 106507 106740 2e-109 403  
gi|33285929|gb|AY223844.1| scaffold2051 96.67 180 6 0 2778  
2957 52993 53172 3e-78 300  
gi|33285929|gb|AY223844.1| scaffold2051 84.32 287 39 4 2762  
3043 206755 207040 4e-71 276  
gi|33285929|gb|AY223844.1| scaffold2051 98.31 59 1 0 3209  
3267 244369 244311 2e-19 104  
gi|33285929|gb|AY223844.1| scaffold671 91.25 811 70 1 1676  
2485 320980 321790 0.0 1105  
gi|33285929|gb|AY223844.1| scaffold671 86.77 771 83 14 1700  
2459 321779 321017 0.0 843  
gi|33285929|gb|AY223844.1| scaffold671 96.13 284 3 1 2751  
3034 39514 39239 1e-125 457  
gi|33285929|gb|AY223844.1| scaffold671 97.96 245 5 0 2792  
3036 204885 205129 4e-116 425  
gi|33285929|gb|AY223844.1| scaffold671 98.41 189 3 0 2764  
2952 240517 240329 3e-88 333  
142  
gi|33285929|gb|AY223844.1| scaffold671 98.33 60 1 0 2981  
3040 300487 300546 6e-20 106  
gi|33285929|gb|AY223844.1| scaffold546 91.66 803 57 5 1683  
2480 325728 326525 0.0 1105  
gi|33285929|gb|AY223844.1| scaffold546 87.28 778 66 25 1700  
2459 326519 325757 0.0 857  
gi|33285929|gb|AY223844.1| scaffold546 98.23 282 4 1 2758  
3038 157236 156955 4e-136 492  
gi|33285929|gb|AY223844.1| scaffold546 97.39 230 6 0 2757  
2986 388794 388565 4e-106 392  
gi|33285929|gb|AY223844.1| scaffold546 95.79 190 5 3 2752  
2938 227057 227246 2e-79 303  
gi|33285929|gb|AY223844.1| scaffold546 79.84 129 13 4 2875  
3003 135053 134938 1e-12 82.4  
gi|33285929|gb|AY223844.1| scaffold546 95.65 46 2 0 2869  
2914 362766 362811 2e-10 75.0

gi|33285929|gb|AY223844.1| scaffold386 91.84 797 56 7 1683  
2476 60464 59674 0.0 1105  
gi|33285929|gb|AY223844.1| scaffold386 87.35 767 70 15 1704  
2457 59681 60433 0.0 856  
gi|33285929|gb|AY223844.1| scaffold386 97.92 288 5 1 2752  
3038 108229 107942 9e-138 497  
gi|33285929|gb|AY223844.1| scaffold386 96.92 292 4 5 2752  
3038 29555 29846 7e-134 484  
gi|33285929|gb|AY223844.1| scaffold386 98.16 272 5 0 2764  
3035 103031 103302 4e-131 475  
gi|33285929|gb|AY223844.1| scaffold386 96.82 283 9 0 2754  
3036 442710 442428 1e-130 473  
gi|33285929|gb|AY223844.1| scaffold386 97.78 270 6 0 2764  
3033 389259 388990 2e-128 466  
gi|33285929|gb|AY223844.1| scaffold386 95.41 196 8 1 2809  
3003 170435 170240 1e-81 311  
gi|33285929|gb|AY223844.1| scaffold158 91.71 796 64 2 1683  
2478 581337 582130 0.0 1105  
gi|33285929|gb|AY223844.1| scaffold158 87.29 771 77 17 1700  
2459 582126 581366 0.0 863  
gi|33285929|gb|AY223844.1| scaffold158 98.93 280 3 0 2753  
3032 54028 54307 7e-139 501  
gi|33285929|gb|AY223844.1| scaffold158 97.89 285 3 3 2755  
3036 523039 523323 1e-135 490  
gi|33285929|gb|AY223844.1| scaffold158 97.14 280 6 2 2758  
3035 64251 64530 5e-130 472  
gi|33285929|gb|AY223844.1| scaffold158 96.43 280 8 2 2758  
3035 173523 173244 1e-126 460  
gi|33285929|gb|AY223844.1| scaffold158 96.68 271 9 0 2765  
3035 380152 379882 7e-124 451  
gi|33285929|gb|AY223844.1| scaffold158 95.91 220 7 2 2757  
2974 247414 247633 5e-95 355  
gi|33285929|gb|AY223844.1| scaffold158 98.45 194 3 0 2764  
2957 299688 299495 4e-91 342  
gi|33285929|gb|AY223844.1| scaffold158 95.07 203 8 2 2758  
2958 63840 64042 7e-84 318  
143  
gi|33285929|gb|AY223844.1| scaffold158 100.00 101 0 0  
2932 3032 299386 299286 2e-44 187  
gi|33285929|gb|AY223844.1| scaffold79 91.82 795 60 3 1683 2476  
405283 406073 0.0 1105  
gi|33285929|gb|AY223844.1| scaffold79 87.32 773 73 20 1700 2458  
406071 405310 0.0 861  
gi|33285929|gb|AY223844.1| scaffold79 90.40 625 49 6 1853 2476  
288035 288649 0.0 813  
gi|33285929|gb|AY223844.1| scaffold79 84.13 630 71 17 1700 2318

288647 288036 6e-164 584  
gi|33285929|gb|AY223844.1| scaffold79 98.57 279 3 1 2764 3042  
489117 488840 4e-136 492  
gi|33285929|gb|AY223844.1| scaffold79 97.20 286 5 3 2755 3037  
113554 113839 9e-133 481  
gi|33285929|gb|AY223844.1| scaffold79 97.85 279 3 3 2758 3034  
271498 271221 3e-132 479  
gi|33285929|gb|AY223844.1| scaffold79 97.50 280 5 2 2758 3035  
280574 280295 1e-131 477  
gi|33285929|gb|AY223844.1| scaffold79 97.79 272 6 0 2765 3036  
443205 442934 2e-129 470  
gi|33285929|gb|AY223844.1| scaffold79 97.19 249 5 2 2755 3001  
400299 400051 2e-114 420  
gi|33285929|gb|AY223844.1| scaffold79 97.08 240 3 4 2755 2991  
523330 523568 7e-109 401  
gi|33285929|gb|AY223844.1| scaffold79 91.35 289 6 7 2763 3032  
55797 55509 1e-101 377  
gi|33285929|gb|AY223844.1| scaffold79 89.80 294 14 3 2758 3035  
180252 179959 2e-99 370  
gi|33285929|gb|AY223844.1| scaffold79 90.00 130 13 0 2776 2905  
559869 559998 8e-39 169  
gi|33285929|gb|AY223844.1| scaffold79 100.00 32 0 0 3174  
3205 278516 278485 5e-06 60.2  
gi|33285929|gb|AY223844.1| scaffold6 91.62 800 63 3 1683 2480  
213283 212486 0.0 1105  
gi|33285929|gb|AY223844.1| scaffold6 92.75 662 48 0 1798 2459  
277106 277767 0.0 959  
gi|33285929|gb|AY223844.1| scaffold6 88.20 771 72 14 1700 2459  
212492 213254 0.0 904  
gi|33285929|gb|AY223844.1| scaffold6 88.57 700 62 13 1683 2373  
277796 277106 0.0 833  
gi|33285929|gb|AY223844.1| scaffold6 97.57 288 3 4 2756 3040  
564495 564781 1e-135 490  
gi|33285929|gb|AY223844.1| scaffold6 97.17 283 6 2 2755 3035  
613314 613596 1e-131 477  
gi|33285929|gb|AY223844.1| scaffold6 96.83 284 8 1 2753 3036  
713762 714044 1e-130 473  
gi|33285929|gb|AY223844.1| scaffold6 96.52 287 6 4 2752 3035  
767652 767367 5e-130 472  
gi|33285929|gb|AY223844.1| scaffold6 97.46 276 6 1 2761 3035  
733735 733460 2e-129 470  
gi|33285929|gb|AY223844.1| scaffold6 96.11 283 9 2 2755 3035  
612864 613146 1e-126 460  
144  
gi|33285929|gb|AY223844.1| scaffold6 93.68 285 12 4 2758 3036  
656138 656422 5e-115 422

gi|33285929|gb|AY223844.1| scaffold6 96.37 248 9 0 2768 3015  
651171 650924 4e-111 409  
gi|33285929|gb|AY223844.1| scaffold6 99.54 217 1 0 2820 3036  
529279 529495 3e-107 396  
gi|33285929|gb|AY223844.1| scaffold6 99.47 188 1 0 2764 2951  
738341 738528 4e-91 342  
gi|33285929|gb|AY223844.1| scaffold6 92.77 166 12 0 1683 1848  
237141 237306 2e-60 241  
gi|33285929|gb|AY223844.1| scaffold6 96.27 134 5 0 2326 2459  
237303 237170 2e-54 220  
gi|33285929|gb|AY223844.1| scaffold6 84.73 131 14 6 2859 2989  
388917 389041 5e-26 126  
gi|33285929|gb|AY223844.1| scaffold6 100.00 55 0 0 2764  
2818 527794 527848 8e-19 102  
gi|33285929|gb|AY223844.1| scaffold6 97.92 48 1 0 2764 2811  
1061388 1061341 3e-13 84.2  
gi|33285929|gb|AY223844.1| scaffold7992 92.79 763 52 3 1700  
2459 69266 68504 0.0 1103  
gi|33285929|gb|AY223844.1| scaffold7992 88.81 804 70 14 1683  
2476 68475 69268 0.0 968  
gi|33285929|gb|AY223844.1| scaffold7992 98.19 276 4 1 2764  
3039 38042 37768 9e-133 481  
gi|33285929|gb|AY223844.1| scaffold7992 96.55 290 7 3 2745  
3033 70882 70595 1e-131 477  
gi|33285929|gb|AY223844.1| scaffold7992 98.85 260 3 0 2751  
3010 53506 53765 9e-128 464  
gi|33285929|gb|AY223844.1| scaffold7992 97.69 216 3 2 2764  
2977 33894 34109 2e-99 370  
gi|33285929|gb|AY223844.1| scaffold7070 91.69 794 66 0 1683  
2476 79866 79073 0.0 1103  
gi|33285929|gb|AY223844.1| scaffold7070 88.20 771 72 14 1700  
2459 79075 79837 0.0 904  
gi|33285929|gb|AY223844.1| scaffold7070 99.28 277 1 1 2764  
3040 81050 80775 2e-138 499  
gi|33285929|gb|AY223844.1| scaffold7070 97.86 281 5 1 2755  
3035 87719 87998 7e-134 484  
gi|33285929|gb|AY223844.1| scaffold7070 95.41 283 12 1 2755  
3036 8148 8430 2e-123 449  
gi|33285929|gb|AY223844.1| scaffold7070 95.67 277 3 4 2764  
3039 64039 63771 2e-119 436  
gi|33285929|gb|AY223844.1| scaffold7070 93.69 111 5 2 2752  
2860 64545 64655 1e-37 165  
gi|33285929|gb|AY223844.1| scaffold6827 91.69 794 66 0 1683  
2476 90236 91029 0.0 1103  
gi|33285929|gb|AY223844.1| scaffold6827 86.68 766 84 12 1704  
2459 91022 90265 0.0 835



gi|33285929|gb|AY223844.1| scaffold6827 97.56 287 5 2 2752  
3037 83994 83709 1e-135 490  
gi|33285929|gb|AY223844.1| scaffold6473 91.70 795 65 1 1683  
2476 9655 8861 0.0 1103  
145  
gi|33285929|gb|AY223844.1| scaffold6473 87.31 772 78 15 1700  
2459 8863 9626 0.0 865  
gi|33285929|gb|AY223844.1| scaffold6473 99.28 139 1 0 2898  
3036 27406 27268 7e-64 252  
gi|33285929|gb|AY223844.1| scaffold6473 100.00 36 0 0  
3171 3206 49743 49778 3e-08 67.6  
gi|33285929|gb|AY223844.1| scaffold6128 91.60 798 66 1 1683  
2480 10383 11179 0.0 1103  
gi|33285929|gb|AY223844.1| scaffold6128 87.63 768 82 10 1700  
2459 11173 10411 0.0 881  
gi|33285929|gb|AY223844.1| scaffold6128 96.33 218 5 3 2758  
2972 96860 97077 5e-95 355  
gi|33285929|gb|AY223844.1| scaffold6128 99.44 177 1 0 2861  
3037 10383 10207 6e-85 322  
gi|33285929|gb|AY223844.1| scaffold6128 97.20 107 3 0 2764  
2870 11281 11175 1e-42 182  
gi|33285929|gb|AY223844.1| scaffold5712 91.60 798 66 1 1683  
2480 85519 86315 0.0 1103  
gi|33285929|gb|AY223844.1| scaffold5712 87.94 771 73 17 1700  
2459 86309 85548 0.0 893  
gi|33285929|gb|AY223844.1| scaffold5712 90.87 252 23 0 2229  
2480 91983 92234 5e-90 339  
gi|33285929|gb|AY223844.1| scaffold5712 91.06 246 19 3 1700  
1942 92228 91983 3e-87 329  
gi|33285929|gb|AY223844.1| scaffold5712 83.39 271 29 8 1687  
1955 53614 53870 2e-59 237  
gi|33285929|gb|AY223844.1| scaffold5712 89.57 163 16 1 2298  
2459 53801 53639 6e-50 206  
gi|33285929|gb|AY223844.1| scaffold3828\_2 91.69 794 66 0 1683  
2476 111959 112752 0.0 1103  
gi|33285929|gb|AY223844.1| scaffold3828\_2 88.08 755 74 9 1713  
2459 112734 111988 0.0 883  
gi|33285929|gb|AY223844.1| scaffold3828\_2 95.80 286 8 2 2749  
3034 103693 103974 4e-126 459  
gi|33285929|gb|AY223844.1| scaffold3036 91.35 809 65 5 1676  
2483 76621 77425 0.0 1103  
gi|33285929|gb|AY223844.1| scaffold3036 87.68 755 74 13 1713  
2459 77400 76657 0.0 863  
gi|33285929|gb|AY223844.1| scaffold3036 98.21 279 4 1 2764  
3042 42012 41735 2e-134 486  
gi|33285929|gb|AY223844.1| scaffold3036 97.85 279 5 1 2758

3035 186026 186304 9e-133 481  
gi|33285929|gb|AY223844.1| scaffold3036 97.12 278 7 1 2760  
3036 136694 136417 7e-129 468  
gi|33285929|gb|AY223844.1| scaffold2442 91.69 794 66 0 1683  
2476 193033 192240 0.0 1103  
gi|33285929|gb|AY223844.1| scaffold2442 88.47 798 71 7 1679  
2476 63439 64215 0.0 946  
gi|33285929|gb|AY223844.1| scaffold2442 88.87 755 70 10 1712  
2459 192257 193004 0.0 918  
gi|33285929|gb|AY223844.1| scaffold2442 84.70 771 74 25 1700  
2457 64213 63474 0.0 730  
146  
gi|33285929|gb|AY223844.1| scaffold2442 97.83 276 4 2 2759  
3034 213249 212976 4e-131 475  
gi|33285929|gb|AY223844.1| scaffold2442 96.49 285 7 3 2754  
3036 34847 34564 7e-129 468  
gi|33285929|gb|AY223844.1| scaffold2442 98.61 72 1 0 2965  
3036 168154 168225 1e-26 128  
gi|33285929|gb|AY223844.1| scaffold2442 100.00 33 0 0  
3174 3206 216913 216945 1e-06 62.1  
gi|33285929|gb|AY223844.1| scaffold2263 91.70 795 65 1 1683  
2476 144653 143859 0.0 1103  
gi|33285929|gb|AY223844.1| scaffold2263 87.97 773 71 17 1700  
2459 143861 144624 0.0 894  
gi|33285929|gb|AY223844.1| scaffold2263 97.90 286 5 1 2752  
3037 170299 170583 1e-136 494  
gi|33285929|gb|AY223844.1| scaffold2263 97.22 288 5 3 2751  
3036 63769 64055 7e-134 484  
gi|33285929|gb|AY223844.1| scaffold2263 96.03 302 4 7 2733  
3031 228402 228106 7e-134 484  
gi|33285929|gb|AY223844.1| scaffold2263 97.86 280 5 1 2760  
3038 103214 102935 2e-133 483  
gi|33285929|gb|AY223844.1| scaffold2263 97.49 279 7 0 2757  
3035 93492 93214 1e-131 477  
gi|33285929|gb|AY223844.1| scaffold2263 95.54 202 7 2 2758  
2957 7021 7222 6e-85 322  
gi|33285929|gb|AY223844.1| scaffold2263 99.12 113 0 1 2932  
3043 7415 7527 7e-49 202  
gi|33285929|gb|AY223844.1| scaffold2263 97.30 74 2 0 2751  
2824 91249 91322 5e-26 126  
gi|33285929|gb|AY223844.1| scaffold1834 91.69 794 66 0 1683  
2476 188249 189042 0.0 1103  
gi|33285929|gb|AY223844.1| scaffold1834 91.32 795 67 2 1683  
2476 205627 204834 0.0 1086  
gi|33285929|gb|AY223844.1| scaffold1834 87.55 771 77 13 1700  
2459 189040 188278 0.0 874

gi|33285929|gb|AY223844.1| scaffold1834 86.75 762 84 12 1707  
2459 204845 205598 0.0 833  
gi|33285929|gb|AY223844.1| scaffold1834 98.60 285 4 0 2751  
3035 327260 327544 5e-140 505  
gi|33285929|gb|AY223844.1| scaffold1834 97.83 46 1 0 2882  
2927 210428 210473 4e-12 80.5  
gi|33285929|gb|AY223844.1| scaffold1016 91.69 794 66 0 1683  
2476 298132 297339 0.0 1103  
gi|33285929|gb|AY223844.1| scaffold1016 88.02 751 70 14 1719  
2459 297363 298103 0.0 870  
gi|33285929|gb|AY223844.1| scaffold1016 93.01 429 30 0 1683  
2111 103333 103761 3e-177 628  
gi|33285929|gb|AY223844.1| scaffold1016 99.30 284 2 0 2751  
3034 61167 61450 8e-143 514  
gi|33285929|gb|AY223844.1| scaffold1016 92.73 344 25 0 2116  
2459 103705 103362 9e-138 497  
gi|33285929|gb|AY223844.1| scaffold1016 96.49 285 7 3 2755  
3036 76261 75977 7e-129 468  
147  
gi|33285929|gb|AY223844.1| scaffold1016 96.40 278 8 2 2761  
3036 281304 281027 1e-125 457  
gi|33285929|gb|AY223844.1| scaffold1016 98.38 247 4 0 2764  
3010 17579 17825 7e-119 435  
gi|33285929|gb|AY223844.1| scaffold1016 96.59 176 4 2 2751  
2925 177448 177274 2e-75 291  
gi|33285929|gb|AY223844.1| scaffold1016 100.00 49 0 0  
2989 3037 177278 177230 2e-15 91.6  
gi|33285929|gb|AY223844.1| scaffold1016 92.98 57 4 0 2761  
2817 266429 266373 3e-13 84.2  
gi|33285929|gb|AY223844.1| scaffold960 91.14 813 70 2 1681  
2492 318176 317365 0.0 1103  
gi|33285929|gb|AY223844.1| scaffold960 87.84 773 71 17 1700  
2459 317383 318145 0.0 885  
gi|33285929|gb|AY223844.1| scaffold960 99.64 278 1 0 2757  
3034 35701 35978 4e-141 508  
gi|33285929|gb|AY223844.1| scaffold960 99.63 273 1 0 2764  
3036 6407 6679 2e-138 499  
gi|33285929|gb|AY223844.1| scaffold960 95.83 288 9 3 2752  
3036 263864 263577 3e-127 462  
gi|33285929|gb|AY223844.1| scaffold960 94.46 289 11 5 2752  
3036 203241 203528 1e-120 440  
gi|33285929|gb|AY223844.1| scaffold960 100.00 111 0 0  
2925 3035 347925 347815 6e-50 206  
gi|33285929|gb|AY223844.1| scaffold748 91.69 794 66 0 1683  
2476 291932 291139 0.0 1103  
gi|33285929|gb|AY223844.1| scaffold748 87.19 773 76 17 1700

2459 291141 291903 0.0 857  
gi|33285929|gb|AY223844.1| scaffold748 96.03 302 10 2 2740  
3041 68892 69191 1e-135 490  
gi|33285929|gb|AY223844.1| scaffold748 97.84 278 3 3 2758  
3032 317307 317584 1e-131 477  
gi|33285929|gb|AY223844.1| scaffold748 95.31 277 11 2 2758  
3032 263603 263327 5e-120 438  
gi|33285929|gb|AY223844.1| scaffold748 99.17 121 1 0 2915  
3035 337695 337815 7e-54 219  
gi|33285929|gb|AY223844.1| scaffold706 91.72 797 61 3 1683  
2479 349517 348726 0.0 1103  
gi|33285929|gb|AY223844.1| scaffold706 90.59 765 64 6 1700  
2459 297531 296770 0.0 1009  
gi|33285929|gb|AY223844.1| scaffold706 87.34 806 77 19 1683  
2476 296741 297533 0.0 900  
gi|33285929|gb|AY223844.1| scaffold706 86.92 772 75 19 1700  
2459 348731 349488 0.0 843  
gi|33285929|gb|AY223844.1| scaffold706 96.39 305 7 4 2751  
3053 175131 175433 2e-138 499  
gi|33285929|gb|AY223844.1| scaffold706 97.92 288 3 3 2751  
3036 222955 222669 3e-137 496  
gi|33285929|gb|AY223844.1| scaffold706 96.45 141 3 2 2755  
2893 251841 251701 1e-57 231  
gi|33285929|gb|AY223844.1| scaffold706 96.80 125 4 0 2764  
2888 62667 62543 4e-51 209  
148  
gi|33285929|gb|AY223844.1| scaffold706 100.00 92 0 0  
2943 3034 251592 251501 2e-39 171  
gi|33285929|gb|AY223844.1| scaffold487 91.32 806 70 0 1676  
2481 403731 402926 0.0 1103  
gi|33285929|gb|AY223844.1| scaffold487 91.44 794 67 1 1683  
2476 277264 278056 0.0 1090  
gi|33285929|gb|AY223844.1| scaffold487 88.11 757 70 15 1713  
2459 402949 403695 0.0 881  
gi|33285929|gb|AY223844.1| scaffold487 87.68 771 75 15 1700  
2459 278054 277293 0.0 880  
gi|33285929|gb|AY223844.1| scaffold487 99.63 273 1 0 2764  
3036 420025 420297 2e-138 499  
gi|33285929|gb|AY223844.1| scaffold487 98.25 285 2 3 2764  
3045 64648 64364 3e-137 496  
gi|33285929|gb|AY223844.1| scaffold487 99.27 273 1 1 2764  
3035 117475 117203 4e-136 492  
gi|33285929|gb|AY223844.1| scaffold487 98.21 279 5 0 2752  
3030 373099 372821 5e-135 488  
gi|33285929|gb|AY223844.1| scaffold487 96.56 291 6 4 2745  
3032 398493 398204 3e-132 479

gi|33285929|gb|AY223844.1| scaffold487 89.84 364 28 6 1683  
2045 363189 362834 4e-126 459  
gi|33285929|gb|AY223844.1| scaffold487 94.98 279 12 1 2751  
3029 183306 183030 2e-119 436  
gi|33285929|gb|AY223844.1| scaffold487 90.12 334 26 4 2126  
2459 362834 363160 1e-116 427  
gi|33285929|gb|AY223844.1| scaffold487 97.26 219 6 0 2814  
3032 100085 99867 5e-100 372  
gi|33285929|gb|AY223844.1| scaffold487 92.22 270 4 10 2758  
3010 350433 350164 3e-98 366  
gi|33285929|gb|AY223844.1| scaffold487 97.66 128 3 0 2904  
3031 250589 250716 2e-54 220  
gi|33285929|gb|AY223844.1| scaffold487 100.00 56 0 0  
2755 2810 250534 250589 2e-19 104  
gi|33285929|gb|AY223844.1| scaffold427 91.59 797 67 0 1680  
2476 286935 286139 0.0 1103  
gi|33285929|gb|AY223844.1| scaffold427 87.94 771 70 18 1700  
2457 286141 286901 0.0 887  
gi|33285929|gb|AY223844.1| scaffold427 99.30 285 2 0 2752  
3036 106678 106962 2e-143 516  
gi|33285929|gb|AY223844.1| scaffold427 99.26 272 2 0 2764  
3035 226179 226450 4e-136 492  
gi|33285929|gb|AY223844.1| scaffold427 98.55 275 3 1 2764  
3037 439158 438884 7e-134 484  
gi|33285929|gb|AY223844.1| scaffold427 94.50 309 7 8 2758  
3063 402535 402234 7e-129 468  
gi|33285929|gb|AY223844.1| scaffold427 94.72 284 15 0 2751  
3034 46840 47123 4e-121 442  
gi|33285929|gb|AY223844.1| scaffold427 93.86 277 16 1 2760  
3035 392540 392816 2e-113 416  
gi|33285929|gb|AY223844.1| scaffold427 97.83 184 3 1 2758  
2940 396571 396754 3e-83 316  
149  
gi|33285929|gb|AY223844.1| scaffold427 94.90 157 7 1 2761  
2916 164332 164488 1e-61 244  
gi|33285929|gb|AY223844.1| scaffold301 91.73 798 59 5 1681  
2476 237327 236535 0.0 1103  
gi|33285929|gb|AY223844.1| scaffold301 92.01 713 50 7 1700  
2407 93252 93962 0.0 996  
gi|33285929|gb|AY223844.1| scaffold301 88.90 721 64 10 1764  
2476 93962 93250 0.0 876  
gi|33285929|gb|AY223844.1| scaffold301 86.79 772 78 18 1700  
2459 236537 237296 0.0 839  
gi|33285929|gb|AY223844.1| scaffold301 97.89 285 5 1 2755  
3038 319459 319175 4e-136 492  
gi|33285929|gb|AY223844.1| scaffold301 98.20 278 5 0 2755

3032 303636 303359 2e-134 486  
gi|33285929|gb|AY223844.1| scaffold301 97.53 283 5 2 2757  
3038 419305 419024 2e-133 483  
gi|33285929|gb|AY223844.1| scaffold301 96.84 285 6 3 2755  
3036 266762 266478 1e-130 473  
gi|33285929|gb|AY223844.1| scaffold301 95.96 272 11 0 2751  
3022 50076 50347 4e-121 442  
gi|33285929|gb|AY223844.1| scaffold301 97.55 163 4 0 2874  
3036 450065 450227 3e-72 279  
gi|33285929|gb|AY223844.1| scaffold301 96.55 116 4 0 2764  
2879 446607 446722 5e-46 193  
gi|33285929|gb|AY223844.1| scaffold301 85.62 153 20 1 2752  
2902 499515 499667 5e-36 159  
gi|33285929|gb|AY223844.1| scaffold86\_0 91.61 799 64 3 1683  
2480 464441 465237 0.0 1103  
gi|33285929|gb|AY223844.1| scaffold86\_0 88.07 771 72 15 1700  
2459 465231 464470 0.0 896  
gi|33285929|gb|AY223844.1| scaffold86\_0 99.64 278 1 0 2758  
3035 60911 61188 4e-141 508  
gi|33285929|gb|AY223844.1| scaffold86\_0 99.63 272 1 0 2764  
3035 424858 425129 9e-138 497  
gi|33285929|gb|AY223844.1| scaffold86\_0 97.51 281 5 2 2758  
3036 462508 462228 3e-132 479  
gi|33285929|gb|AY223844.1| scaffold86\_0 97.16 282 5 3 2758  
3036 149932 149651 1e-130 473  
gi|33285929|gb|AY223844.1| scaffold86\_0 96.47 283 10 0 2755  
3037 465683 465401 7e-129 468  
gi|33285929|gb|AY223844.1| scaffold86\_0 97.97 197 3 1 2836  
3031 365168 364972 2e-90 340  
gi|33285929|gb|AY223844.1| scaffold86\_0 87.75 204 22 3 2809  
3009 421224 421427 7e-59 235  
gi|33285929|gb|AY223844.1| scaffold86\_0 90.85 142 13 0 2786  
2927 350625 350766 2e-45 191  
gi|33285929|gb|AY223844.1| scaffold86\_0 97.25 109 3 0 2764  
2872 399169 399061 8e-44 185  
gi|33285929|gb|AY223844.1| scaffold15973 91.68 793 66 0 1683  
2475 7891 8683 0.0 1101  
gi|33285929|gb|AY223844.1| scaffold15973 86.85 768 88 10 1700  
2459 8682 7920 0.0 846  
150  
gi|33285929|gb|AY223844.1| scaffold9945 91.15 814 67 5 1673  
2483 27546 28357 0.0 1101  
gi|33285929|gb|AY223844.1| scaffold9945 86.42 773 83 18 1700  
2459 28348 27585 0.0 828  
gi|33285929|gb|AY223844.1| scaffold1036\_2 92.79 763 49 6 1700  
2457 123317 122556 0.0 1101

gi|33285929|gb|AY223844.1| scaffold1036\_2 88.46 806 69 18 1683  
2476 122526 123319 0.0 952  
gi|33285929|gb|AY223844.1| scaffold1036\_2 98.14 161 2 1 2880  
3039 100372 100212 3e-72 279  
gi|33285929|gb|AY223844.1| scaffold1036\_2 96.97 132 1 3 2753  
2881 100717 100586 7e-54 219  
gi|33285929|gb|AY223844.1| scaffold1036\_2 98.37 123 2 0 2757  
2879 123 1 3e-53 217  
gi|33285929|gb|AY223844.1| scaffold479 91.69 794 64 1 1683  
2476 149276 148485 0.0 1101  
gi|33285929|gb|AY223844.1| scaffold479 88.07 771 71 15 1700  
2459 148487 149247 0.0 894  
gi|33285929|gb|AY223844.1| scaffold479 99.31 291 2 0 2752  
3042 56709 56999 1e-146 527  
gi|33285929|gb|AY223844.1| scaffold479 97.89 285 5 1 2751  
3035 170441 170158 4e-136 492  
gi|33285929|gb|AY223844.1| scaffold479 97.85 279 4 2 2758  
3034 219603 219325 9e-133 481  
gi|33285929|gb|AY223844.1| scaffold479 97.85 279 3 3 2764  
3039 429235 428957 3e-132 479  
gi|33285929|gb|AY223844.1| scaffold479 97.15 281 7 1 2764  
3044 352181 351902 1e-130 473  
gi|33285929|gb|AY223844.1| scaffold479 96.75 277 6 3 2758  
3031 173552 173828 4e-126 459  
gi|33285929|gb|AY223844.1| scaffold479 96.02 226 5 4 2752  
2973 128600 128375 9e-98 364  
gi|33285929|gb|AY223844.1| scaffold14856 91.77 790 64 1 1683  
2471 23266 24055 0.0 1099  
gi|33285929|gb|AY223844.1| scaffold14856 87.94 771 74 13 1700  
2459 24058 23296 0.0 893  
gi|33285929|gb|AY223844.1| scaffold6441 91.10 820 59 8 1682  
2491 66992 67807 0.0 1099  
gi|33285929|gb|AY223844.1| scaffold6441 87.77 777 73 15 1700  
2459 67793 67022 0.0 891  
gi|33285929|gb|AY223844.1| scaffold6441 97.70 174 4 0 2803  
2976 4866 5039 3e-78 300  
gi|33285929|gb|AY223844.1| scaffold4933 91.50 800 64 4 1683  
2478 84601 85400 0.0 1099  
gi|33285929|gb|AY223844.1| scaffold4933 86.58 775 78 20 1700  
2459 85396 84633 0.0 832  
gi|33285929|gb|AY223844.1| scaffold4933 99.64 275 1 0 2764  
3038 74288 74014 2e-139 503  
gi|33285929|gb|AY223844.1| scaffold4933 97.19 285 5 3 2754  
3036 139810 140093 3e-132 479  
gi|33285929|gb|AY223844.1| scaffold4933 96.53 288 6 4 2752  
3035 98174 97887 1e-130 473

151

gi|33285929|gb|AY223844.1| scaffold4933 95.18 83 4 0 3208  
3290 39145 39227 1e-27 132  
gi|33285929|gb|AY223844.1| scaffold3709 91.22 809 67 3 1670  
2476 27989 28795 0.0 1099  
gi|33285929|gb|AY223844.1| scaffold3709 87.15 755 81 10 1713  
2459 28777 28031 0.0 845  
gi|33285929|gb|AY223844.1| scaffold3709 98.24 284 5 0 2753  
3036 97283 97566 9e-138 497  
gi|33285929|gb|AY223844.1| scaffold3709 87.01 77 9 1 2963  
3038 161369 161445 8e-14 86.1  
gi|33285929|gb|AY223844.1| scaffold3709 100.00 33 0 0  
3176 3208 119631 119663 1e-06 62.1  
gi|33285929|gb|AY223844.1| scaffold3245 91.13 812 68 4 1675  
2483 68291 69101 0.0 1099  
gi|33285929|gb|AY223844.1| scaffold3245 86.71 775 77 20 1700  
2459 69092 68329 0.0 837  
gi|33285929|gb|AY223844.1| scaffold3245 97.58 289 6 1 2750  
3037 190188 190476 1e-136 494  
gi|33285929|gb|AY223844.1| scaffold3245 97.13 279 7 1 2758  
3035 46657 46379 2e-129 470  
gi|33285929|gb|AY223844.1| scaffold3245 91.69 325 25 2 1676  
1999 18174 17851 2e-123 449  
gi|33285929|gb|AY223844.1| scaffold3245 96.06 279 5 4 2755  
3027 57696 57418 2e-123 449  
gi|33285929|gb|AY223844.1| scaffold3245 90.61 330 31 0 2152  
2481 17853 17524 5e-120 438  
gi|33285929|gb|AY223844.1| scaffold3245 90.65 321 27 3 1700  
2017 17531 17851 1e-115 424  
gi|33285929|gb|AY223844.1| scaffold3245 92.39 289 22 0 2172  
2460 17851 18139 3e-112 412  
gi|33285929|gb|AY223844.1| scaffold3245 96.62 237 4 4 2752  
2985 108563 108798 1e-105 390  
gi|33285929|gb|AY223844.1| scaffold2283 91.20 807 71 0 1678  
2484 46784 47590 0.0 1099  
gi|33285929|gb|AY223844.1| scaffold2283 87.71 773 72 17 1700  
2459 47580 46818 0.0 880  
gi|33285929|gb|AY223844.1| scaffold2283 92.81 431 31 0 1683  
2113 110810 110380 1e-176 627  
gi|33285929|gb|AY223844.1| scaffold2283 96.14 285 8 3 2755  
3036 45853 45569 3e-127 462  
gi|33285929|gb|AY223844.1| scaffold2283 89.88 346 31 4 2116  
2459 110438 110781 4e-121 442  
gi|33285929|gb|AY223844.1| scaffold2283 82.95 88 14 1 2952  
3038 67738 67651 1e-11 78.7  
gi|33285929|gb|AY223844.1| scaffold142 91.13 812 69 3 1671



2481 230239 231048 0.0 1099  
gi|33285929|gb|AY223844.1| scaffold142 88.21 772 69 17 1700  
2459 231041 230280 0.0 904  
gi|33285929|gb|AY223844.1| scaffold142 98.57 279 4 0 2755  
3033 70329 70051 1e-136 494  
gi|33285929|gb|AY223844.1| scaffold142 98.56 277 3 1 2761  
3036 227420 227144 5e-135 488  
152  
gi|33285929|gb|AY223844.1| scaffold142 96.92 292 4 5 2752  
3038 488576 488285 7e-134 484  
gi|33285929|gb|AY223844.1| scaffold142 98.19 277 5 0 2759  
3035 522631 522355 7e-134 484  
gi|33285929|gb|AY223844.1| scaffold142 98.19 276 4 1 2764  
3039 573343 573617 9e-133 481  
gi|33285929|gb|AY223844.1| scaffold142 96.34 273 7 3 2758  
3027 561124 561396 3e-122 446  
gi|33285929|gb|AY223844.1| scaffold142 82.94 252 37 6 2755  
3001 503856 504106 6e-55 222  
gi|33285929|gb|AY223844.1| scaffold142 93.71 143 7 2 2758  
2898 344235 344377 3e-52 213  
gi|33285929|gb|AY223844.1| scaffold142 100.00 96 0 0  
2928 3023 344396 344491 1e-41 178  
gi|33285929|gb|AY223844.1| scaffold142 97.26 73 1 1 2965  
3037 81793 81722 6e-25 122  
gi|33285929|gb|AY223844.1| scaffold11449 91.56 794 67 0 1683  
2476 41080 41873 0.0 1098  
gi|33285929|gb|AY223844.1| scaffold11449 87.94 771 74 15 1700  
2459 41871 41109 0.0 891  
gi|33285929|gb|AY223844.1| scaffold8658 91.57 795 65 2 1683  
2476 57568 56775 0.0 1098  
gi|33285929|gb|AY223844.1| scaffold8658 87.78 769 79 13 1700  
2459 56777 57539 0.0 887  
gi|33285929|gb|AY223844.1| scaffold8658 96.75 277 8 1 2761  
3036 45027 45303 1e-126 460  
gi|33285929|gb|AY223844.1| scaffold8182 92.66 763 53 3 1700  
2459 70847 70085 0.0 1098  
gi|33285929|gb|AY223844.1| scaffold8182 89.45 815 66 14 1679  
2483 70052 70856 0.0 1011  
gi|33285929|gb|AY223844.1| scaffold8182 94.80 269 5 2 2764  
3032 47526 47785 1e-111 411  
gi|33285929|gb|AY223844.1| scaffold3917 91.81 794 55 4 1683  
2476 100856 100073 0.0 1098  
gi|33285929|gb|AY223844.1| scaffold3917 88.43 769 60 18 1700  
2457 100075 100825 0.0 902  
gi|33285929|gb|AY223844.1| scaffold3917 97.79 272 6 0 2764  
3035 121456 121727 2e-129 470

gi|33285929|gb|AY223844.1| scaffold3917 98.17 218 4 0 2821  
3038 77359 77576 9e-103 381  
gi|33285929|gb|AY223844.1| scaffold3917 100.00 80 0 0  
2957 3036 89076 89155 1e-32 148  
gi|33285929|gb|AY223844.1| scaffold3917 94.92 59 3 0 2764  
2822 75657 75715 5e-16 93.5  
gi|33285929|gb|AY223844.1| scaffold2740 91.57 795 65 2 1683  
2476 142364 143157 0.0 1098  
gi|33285929|gb|AY223844.1| scaffold2740 87.92 753 68 18 1718  
2459 143134 142394 0.0 865  
gi|33285929|gb|AY223844.1| scaffold1362 92.66 763 53 3 1700  
2459 41315 40553 0.0 1098  
gi|33285929|gb|AY223844.1| scaffold1362 88.47 815 74 14 1679  
2483 40520 41324 0.0 966  
153  
gi|33285929|gb|AY223844.1| scaffold1362 98.58 281 2 2 2758  
3036 7095 6815 3e-137 496  
gi|33285929|gb|AY223844.1| scaffold1362 97.19 285 8 0 2752  
3036 287064 286780 2e-133 483  
gi|33285929|gb|AY223844.1| scaffold1362 97.81 274 6 0 2764  
3037 168702 168975 1e-130 473  
gi|33285929|gb|AY223844.1| scaffold1362 98.61 216 1 2 2758  
2971 286285 286070 9e-103 381  
gi|33285929|gb|AY223844.1| scaffold1362 87.24 290 29 7 2748  
3034 34569 34853 2e-85 324  
gi|33285929|gb|AY223844.1| scaffold1091 93.27 743 50 0 1683  
2425 223568 224310 0.0 1098  
gi|33285929|gb|AY223844.1| scaffold1091 88.50 722 63 14 1746  
2457 224310 223599 0.0 856  
gi|33285929|gb|AY223844.1| scaffold1091 96.84 285 6 3 2755  
3036 140110 139826 1e-130 473  
gi|33285929|gb|AY223844.1| scaffold1091 97.44 273 7 0 2764  
3036 218277 218549 2e-128 466  
gi|33285929|gb|AY223844.1| scaffold1091 79.71 276 52 2 2756  
3027 42252 41977 3e-47 196  
gi|33285929|gb|AY223844.1| scaffold1076 91.48 798 67 1 1683  
2479 212804 212007 0.0 1098  
gi|33285929|gb|AY223844.1| scaffold1076 90.05 774 63 8 1700  
2459 285535 286308 0.0 992  
gi|33285929|gb|AY223844.1| scaffold1076 87.48 815 71 20 1683  
2476 286337 285533 0.0 913  
gi|33285929|gb|AY223844.1| scaffold1076 88.05 770 72 15 1700  
2457 212012 212773 0.0 896  
gi|33285929|gb|AY223844.1| scaffold1076 98.28 291 2 3 2756  
3044 296102 295813 1e-140 507  
gi|33285929|gb|AY223844.1| scaffold1076 96.96 230 7 0 2793

3022 304982 304753 2e-104 387  
gi|33285929|gb|AY223844.1| scaffold388 92.66 763 53 3 1700  
2459 72856 72094 0.0 1098  
gi|33285929|gb|AY223844.1| scaffold388 88.18 804 76 13 1683  
2476 72064 72858 0.0 941  
gi|33285929|gb|AY223844.1| scaffold388 91.53 496 36 3 1681  
2170 404232 403737 0.0 680  
gi|33285929|gb|AY223844.1| scaffold388 98.21 279 3 2 2758  
3034 141497 141775 2e-134 486  
gi|33285929|gb|AY223844.1| scaffold388 96.91 291 5 4 2753  
3039 15128 14838 7e-134 484  
gi|33285929|gb|AY223844.1| scaffold388 97.18 284 7 1 2753  
3036 18715 18997 3e-132 479  
gi|33285929|gb|AY223844.1| scaffold388 95.16 289 10 4 2752  
3036 65496 65208 2e-124 453  
gi|33285929|gb|AY223844.1| scaffold388 95.02 281 12 2 2757  
3035 226714 226434 1e-120 440  
gi|33285929|gb|AY223844.1| scaffold388 98.37 246 4 0 2764  
3009 340571 340326 2e-118 433  
gi|33285929|gb|AY223844.1| scaffold388 89.31 346 35 2 2116  
2459 403856 404201 2e-118 433  
154  
gi|33285929|gb|AY223844.1| scaffold388 91.18 306 27 0 2173  
2478 403053 402748 2e-113 416  
gi|33285929|gb|AY223844.1| scaffold388 91.72 302 22 3 1700  
1998 402752 403053 2e-113 416  
gi|33285929|gb|AY223844.1| scaffold388 88.15 287 16 7 2751  
3032 255722 255449 4e-86 326  
gi|33285929|gb|AY223844.1| scaffold388 96.51 86 2 1 2758  
2842 255976 255891 2e-30 141  
gi|33285929|gb|AY223844.1| scaffold7776 91.19 806 70 1 1672  
2476 11298 12103 0.0 1096  
gi|33285929|gb|AY223844.1| scaffold7776 87.71 773 72 18 1700  
2459 12101 11339 0.0 881  
gi|33285929|gb|AY223844.1| scaffold3005 91.28 803 69 1 1674  
2475 140805 140003 0.0 1096  
gi|33285929|gb|AY223844.1| scaffold3005 87.05 772 80 15 1700  
2459 140004 140767 0.0 854  
gi|33285929|gb|AY223844.1| scaffold3005 98.19 276 3 2 2764  
3037 5955 6230 9e-133 481  
gi|33285929|gb|AY223844.1| scaffold3005 97.83 276 5 1 2761  
3035 40283 40558 4e-131 475  
gi|33285929|gb|AY223844.1| scaffold3005 99.19 247 2 0 2764  
3010 138256 138502 3e-122 446  
gi|33285929|gb|AY223844.1| scaffold3005 100.00 118 0 0  
2919 3036 138513 138630 7e-54 219

gi|33285929|gb|AY223844.1| scaffold2607 91.48 798 64 3 1681  
2476 32391 33186 0.0 1096  
gi|33285929|gb|AY223844.1| scaffold2607 87.68 755 77 12 1713  
2459 33168 32422 0.0 867  
gi|33285929|gb|AY223844.1| scaffold2607 96.53 288 9 1 2755  
3041 156080 156367 4e-131 475  
gi|33285929|gb|AY223844.1| scaffold2607 83.47 236 27 7 2752  
2979 103044 102813 4e-51 209  
gi|33285929|gb|AY223844.1| scaffold2500 91.57 795 63 3 1683  
2476 127962 128753 0.0 1096  
gi|33285929|gb|AY223844.1| scaffold2500 88.01 767 70 17 1704  
2459 128746 127991 0.0 889  
gi|33285929|gb|AY223844.1| scaffold2500 92.72 151 10 1 2761  
2911 115789 115640 3e-53 217  
gi|33285929|gb|AY223844.1| scaffold2500 100.00 93 0 0  
2942 3034 54476 54384 6e-40 172  
gi|33285929|gb|AY223844.1| scaffold2500 92.00 125 7 3 2754  
2876 54923 54800 6e-40 172  
gi|33285929|gb|AY223844.1| scaffold2500 90.55 127 7 3 2919  
3044 114953 115075 4e-37 163  
gi|33285929|gb|AY223844.1| scaffold1083 91.48 798 64 3 1683  
2478 78745 77950 0.0 1096  
gi|33285929|gb|AY223844.1| scaffold1083 87.32 773 75 16 1700  
2459 77954 78716 0.0 865  
gi|33285929|gb|AY223844.1| scaffold1083 91.60 369 25 4 1700  
2062 174241 173873 1e-140 507  
gi|33285929|gb|AY223844.1| scaffold1083 90.98 366 28 3 2115  
2476 173879 174243 5e-135 488  
155  
gi|33285929|gb|AY223844.1| scaffold1083 97.86 281 4 2 2758  
3036 201724 201444 7e-134 484  
gi|33285929|gb|AY223844.1| scaffold1083 96.48 284 5 4 2758  
3036 145748 146031 9e-128 464  
gi|33285929|gb|AY223844.1| scaffold1083 96.72 183 4 1 2788  
2968 214144 213962 2e-79 303  
gi|33285929|gb|AY223844.1| scaffold1083 94.78 134 7 0 1917  
2050 172965 173098 4e-51 209  
gi|33285929|gb|AY223844.1| scaffold1083 93.02 129 6 3 1683  
1810 172649 172775 8e-44 185  
gi|33285929|gb|AY223844.1| scaffold1083 91.67 132 11 0 2123  
2254 173096 172965 3e-43 183  
gi|33285929|gb|AY223844.1| scaffold1083 100.00 91 0 0  
2946 3036 192999 192909 8e-39 169  
gi|33285929|gb|AY223844.1| scaffold1083 95.92 98 4 0 2361  
2458 172775 172678 5e-36 159  
gi|33285929|gb|AY223844.1| scaffold643 91.47 797 66 2 1681

2476 317271 318066 0.0 1096  
gi|33285929|gb|AY223844.1| scaffold643 89.59 759 64 10 1713  
2458 247703 246947 0.0 952  
gi|33285929|gb|AY223844.1| scaffold643 85.66 823 80 26 1686  
2481 246915 247726 0.0 832  
gi|33285929|gb|AY223844.1| scaffold643 86.40 772 84 16 1700  
2459 318064 317302 0.0 826  
gi|33285929|gb|AY223844.1| scaffold643 97.14 280 6 2 2757  
3034 311076 310797 5e-130 472  
gi|33285929|gb|AY223844.1| scaffold643 95.82 287 5 4 2752  
3036 179490 179771 1e-125 457  
gi|33285929|gb|AY223844.1| scaffold643 80.00 280 34 11 2757  
3034 395576 395317 2e-44 187  
gi|33285929|gb|AY223844.1| scaffold643 90.74 54 5 0 2950  
3003 311483 311536 6e-10 73.1  
gi|33285929|gb|AY223844.1| scaffold6367 91.46 796 66 1 1683  
2476 23734 22939 0.0 1094  
gi|33285929|gb|AY223844.1| scaffold6367 87.56 772 75 15 1700  
2458 22941 23704 0.0 876  
gi|33285929|gb|AY223844.1| scaffold6367 97.98 248 4 1 2792  
3039 104756 104510 3e-117 429  
gi|33285929|gb|AY223844.1| scaffold4864 91.35 798 69 0 1683  
2480 143425 142628 0.0 1094  
gi|33285929|gb|AY223844.1| scaffold4864 86.90 771 78 18 1700  
2457 142634 143394 0.0 845  
gi|33285929|gb|AY223844.1| scaffold4864 97.96 196 2 2 2758  
2951 49660 49855 5e-90 339  
gi|33285929|gb|AY223844.1| scaffold4864 99.38 161 1 0 2877  
3037 32912 32752 4e-76 292  
gi|33285929|gb|AY223844.1| scaffold4864 95.56 180 6 2 2758  
2936 13998 13820 2e-74 287  
gi|33285929|gb|AY223844.1| scaffold4864 96.03 126 3 2 2758  
2881 33478 33353 2e-49 204  
gi|33285929|gb|AY223844.1| scaffold4422 91.09 808 71 1 1683  
2490 125211 126017 0.0 1094  
156  
gi|33285929|gb|AY223844.1| scaffold4422 87.06 773 77 16 1700  
2459 126002 125240 0.0 854  
gi|33285929|gb|AY223844.1| scaffold4422 97.55 286 4 3 2755  
3037 18291 18576 2e-134 486  
gi|33285929|gb|AY223844.1| scaffold4422 97.43 272 5 2 2758  
3027 124693 124422 3e-127 462  
gi|33285929|gb|AY223844.1| scaffold3086 91.08 807 72 0 1675  
2481 102789 101983 0.0 1094  
gi|33285929|gb|AY223844.1| scaffold3086 87.03 771 81 14 1700  
2459 101990 102752 0.0 852

gi|33285929|gb|AY223844.1| scaffold3086 98.58 282 2 2 2754  
3034 197125 197405 9e-138 497  
gi|33285929|gb|AY223844.1| scaffold3086 95.83 288 8 4 2752  
3036 135664 135378 3e-127 462  
gi|33285929|gb|AY223844.1| scaffold544 91.46 796 67 1 1681  
2476 265389 264595 0.0 1094  
gi|33285929|gb|AY223844.1| scaffold544 86.88 770 83 14 1700  
2459 264597 265358 0.0 848  
gi|33285929|gb|AY223844.1| scaffold544 99.65 287 1 0 2750  
3036 390786 391072 4e-146 525  
gi|33285929|gb|AY223844.1| scaffold544 98.59 283 3 1 2755  
3036 125758 125476 2e-138 499  
gi|33285929|gb|AY223844.1| scaffold544 99.28 276 1 1 2761  
3035 402195 402470 9e-138 497  
gi|33285929|gb|AY223844.1| scaffold544 98.24 284 2 3 2757  
3037 80009 80292 1e-136 494  
gi|33285929|gb|AY223844.1| scaffold544 96.63 297 8 2 2754  
3049 378956 379251 4e-136 492  
gi|33285929|gb|AY223844.1| scaffold544 98.41 251 4 0 2754  
3004 419110 419360 4e-121 442  
gi|33285929|gb|AY223844.1| scaffold544 96.03 252 7 3 2752  
3000 309039 308788 1e-110 407  
gi|33285929|gb|AY223844.1| scaffold544 100.00 93 0 0  
2940 3032 308785 308693 6e-40 172  
gi|33285929|gb|AY223844.1| scaffold544 81.58 190 25 6 2798  
2977 136989 136800 1e-32 148  
gi|33285929|gb|AY223844.1| scaffold544 95.06 81 4 0 2867  
2947 271431 271511 1e-26 128  
gi|33285929|gb|AY223844.1| scaffold452 91.40 802 61 5 1683  
2476 86816 87617 0.0 1094  
gi|33285929|gb|AY223844.1| scaffold452 87.02 778 70 23 1700  
2456 87615 86848 0.0 850  
gi|33285929|gb|AY223844.1| scaffold452 98.18 274 4 1 2764  
3036 346469 346196 1e-131 477  
gi|33285929|gb|AY223844.1| scaffold452 96.84 285 5 4 2754  
3035 250018 250301 1e-130 473  
gi|33285929|gb|AY223844.1| scaffold452 96.21 290 7 4 2752  
3037 303043 303332 5e-130 472  
gi|33285929|gb|AY223844.1| scaffold319 91.58 796 60 4 1683  
2476 287099 286309 0.0 1094  
gi|33285929|gb|AY223844.1| scaffold319 87.74 775 63 23 1700  
2459 286311 287068 0.0 876  
157  
gi|33285929|gb|AY223844.1| scaffold319 100.00 275 0 0  
2761 3035 492961 493235 4e-141 508  
gi|33285929|gb|AY223844.1| scaffold319 99.63 273 1 0 2764

3036 328607 328335 2e-138 499  
gi|33285929|gb|AY223844.1| scaffold319 97.91 287 6 0 2751  
3037 265635 265921 9e-138 497  
gi|33285929|gb|AY223844.1| scaffold319 96.85 286 9 0 2751  
3036 130103 129818 3e-132 479  
gi|33285929|gb|AY223844.1| scaffold319 96.56 291 7 3 2746  
3034 174457 174168 3e-132 479  
gi|33285929|gb|AY223844.1| scaffold319 97.83 277 4 2 2761  
3035 425085 424809 1e-131 477  
gi|33285929|gb|AY223844.1| scaffold319 97.17 283 4 4 2755  
3033 43330 43612 4e-131 475  
gi|33285929|gb|AY223844.1| scaffold319 96.44 281 8 2 2758  
3036 5802 6082 3e-127 462  
gi|33285929|gb|AY223844.1| scaffold319 95.10 286 6 4 2756  
3037 469106 468825 1e-121 444  
gi|33285929|gb|AY223844.1| scaffold319 94.70 283 13 2 2756  
3036 439030 438748 5e-120 438  
gi|33285929|gb|AY223844.1| scaffold77357 91.44 794 68 0 1683  
2476 98 891 0.0 1092  
gi|33285929|gb|AY223844.1| scaffold77357 88.07 771 73 13 1700  
2459 889 127 0.0 898  
gi|33285929|gb|AY223844.1| scaffold15411 90.98 809 73 0 1675  
2483 20279 19471 0.0 1092  
gi|33285929|gb|AY223844.1| scaffold15411 87.68 771 76 14 1700  
2459 19480 20242 0.0 880  
gi|33285929|gb|AY223844.1| scaffold15411 100.00 107 0 0  
2898 3004 8385 8491 1e-47 198  
gi|33285929|gb|AY223844.1| scaffold10481 91.45 795 66 2 1683  
2476 35183 34390 0.0 1092  
gi|33285929|gb|AY223844.1| scaffold10481 88.49 773 66 17 1700  
2459 34392 35154 0.0 913  
gi|33285929|gb|AY223844.1| scaffold10481 97.54 285 7 0 2753  
3037 36411 36127 5e-135 488  
gi|33285929|gb|AY223844.1| scaffold6653 91.44 794 68 0 1683  
2476 57574 58367 0.0 1092  
gi|33285929|gb|AY223844.1| scaffold6653 87.68 771 76 13 1700  
2459 58365 57603 0.0 881  
gi|33285929|gb|AY223844.1| scaffold6653 97.54 285 4 3 2755  
3036 51839 52123 7e-134 484  
gi|33285929|gb|AY223844.1| scaffold6653 99.12 114 1 0 2839  
2952 80399 80512 6e-50 206  
gi|33285929|gb|AY223844.1| scaffold6653 84.33 134 19 2 2855  
2987 99352 99220 4e-27 130  
gi|33285929|gb|AY223844.1| scaffold6653 94.83 58 1 2 2755  
2810 80340 80397 6e-15 89.8  
gi|33285929|gb|AY223844.1| scaffold6362 92.53 763 54 3 1700

2459 19070 18308 0.0 1092  
gi|33285929|gb|AY223844.1| scaffold6362 88.06 804 80 11 1685  
2480 18281 19076 0.0 941  
158  
gi|33285929|gb|AY223844.1| scaffold6177 91.44 794 68 0 1688  
2481 38028 37235 0.0 1092  
gi|33285929|gb|AY223844.1| scaffold6177 87.16 771 76 17 1700  
2457 37242 38002 0.0 854  
gi|33285929|gb|AY223844.1| scaffold6177 87.50 72 9 0 2809  
2880 77031 77102 3e-13 84.2  
gi|33285929|gb|AY223844.1| scaffold4789 91.39 801 62 2 1683  
2476 26604 25804 0.0 1092  
gi|33285929|gb|AY223844.1| scaffold4789 88.03 777 65 18 1700  
2457 25806 26573 0.0 896  
gi|33285929|gb|AY223844.1| scaffold4789 100.00 79 0 0  
2958 3036 69344 69422 4e-32 147  
gi|33285929|gb|AY223844.1| scaffold4445 91.46 796 64 3 1683  
2476 83274 82481 0.0 1092  
gi|33285929|gb|AY223844.1| scaffold4445 88.00 775 66 21 1700  
2459 82483 83245 0.0 891  
gi|33285929|gb|AY223844.1| scaffold4445 97.86 280 4 2 2758  
3035 49640 49361 2e-133 483  
gi|33285929|gb|AY223844.1| scaffold4445 97.46 276 6 1 2764  
3038 85961 86236 2e-129 470  
gi|33285929|gb|AY223844.1| scaffold4445 83.97 156 20 3 2851  
3005 36174 36325 1e-31 145  
gi|33285929|gb|AY223844.1| scaffold4445 94.74 57 3 0 2939  
2995 138745 138801 6e-15 89.8  
gi|33285929|gb|AY223844.1| scaffold3772 91.02 813 65 6 1674  
2480 45982 46792 0.0 1092  
gi|33285929|gb|AY223844.1| scaffold3772 87.53 754 78 9 1713  
2458 46770 46025 0.0 859  
gi|33285929|gb|AY223844.1| scaffold3772 96.85 286 6 3 2752  
3036 155618 155901 4e-131 475  
gi|33285929|gb|AY223844.1| scaffold3772 96.14 259 9 1 2775  
3032 175668 175410 5e-115 422  
gi|33285929|gb|AY223844.1| scaffold2417 91.45 795 66 2 1683  
2476 110549 109756 0.0 1092  
gi|33285929|gb|AY223844.1| scaffold2417 87.95 772 72 15 1700  
2459 109758 110520 0.0 893  
gi|33285929|gb|AY223844.1| scaffold2417 98.20 278 4 1 2761  
3037 17393 17116 7e-134 484  
gi|33285929|gb|AY223844.1| scaffold2417 92.06 189 15 0 1683  
1871 178068 177880 3e-68 267  
gi|33285929|gb|AY223844.1| scaffold2417 85.77 253 31 2 2753  
3005 37742 37495 3e-67 263



gi|33285929|gb|AY223844.1| scaffold2417 95.65 161 5 2 2300  
2459 177880 178039 2e-65 257  
gi|33285929|gb|AY223844.1| scaffold2417 91.92 99 8 0 2382  
2480 173016 172918 6e-30 139  
gi|33285929|gb|AY223844.1| scaffold2417 90.32 93 6 3 1700  
1789 172924 173016 8e-24 119  
gi|33285929|gb|AY223844.1| scaffold2188 91.44 794 68 0 1683  
2476 134469 133676 0.0 1092  
gi|33285929|gb|AY223844.1| scaffold2188 86.68 773 80 17 1700  
2459 133678 134440 0.0 835  
159  
gi|33285929|gb|AY223844.1| scaffold2188 97.16 211 3 3 2755  
2962 91676 91466 2e-94 353  
gi|33285929|gb|AY223844.1| scaffold2188 94.12 85 5 0 2827  
2911 143398 143314 4e-27 130  
gi|33285929|gb|AY223844.1| scaffold1772 91.07 806 72 0 1675  
2480 41458 40653 0.0 1092  
gi|33285929|gb|AY223844.1| scaffold1772 87.45 773 74 19 1700  
2459 40659 41421 0.0 870  
gi|33285929|gb|AY223844.1| scaffold1772 98.25 286 2 3 2755  
3037 55063 55348 9e-138 497  
gi|33285929|gb|AY223844.1| scaffold1772 93.21 221 15 0 2208  
2428 157662 157442 4e-86 326  
gi|33285929|gb|AY223844.1| scaffold1772 97.33 187 5 0 2835  
3021 150577 150391 7e-84 318  
gi|33285929|gb|AY223844.1| scaffold1772 91.96 224 18 0 1743  
1966 157442 157665 9e-83 315  
gi|33285929|gb|AY223844.1| scaffold1772 89.53 172 13 5 1962  
2131 158014 158182 1e-52 215  
gi|33285929|gb|AY223844.1| scaffold1772 93.75 96 6 0 2116  
2211 158107 158012 1e-31 145  
gi|33285929|gb|AY223844.1| scaffold1772 84.73 131 18 2 2754  
2884 187241 187369 4e-27 130  
gi|33285929|gb|AY223844.1| scaffold1383 91.47 797 63 4 1683  
2476 137632 138426 0.0 1092  
gi|33285929|gb|AY223844.1| scaffold1383 87.35 775 72 17 1700  
2459 138424 137661 0.0 867  
gi|33285929|gb|AY223844.1| scaffold1383 97.89 284 5 1 2755  
3037 98093 97810 1e-135 490  
gi|33285929|gb|AY223844.1| scaffold1383 98.90 273 3 0 2764  
3036 29782 29510 5e-135 488  
gi|33285929|gb|AY223844.1| scaffold1383 97.88 283 5 1 2755  
3036 294447 294165 5e-135 488  
gi|33285929|gb|AY223844.1| scaffold1383 96.10 282 9 2 2758  
3037 86043 85762 4e-126 459  
gi|33285929|gb|AY223844.1| scaffold1151 91.34 797 69 0 1683

2479 311658 312454 0.0 1092  
gi|33285929|gb|AY223844.1| scaffold1151 91.85 785 54 8 1700  
2479 243028 242249 0.0 1086  
gi|33285929|gb|AY223844.1| scaffold1151 88.87 791 60 21 1700  
2476 242254 243030 0.0 948  
gi|33285929|gb|AY223844.1| scaffold1151 87.31 772 77 15 1700  
2459 312449 311687 0.0 863  
gi|33285929|gb|AY223844.1| scaffold1151 97.86 280 4 2 2758  
3035 139650 139371 2e-133 483  
gi|33285929|gb|AY223844.1| scaffold1151 97.17 283 7 1 2754  
3035 150521 150239 1e-131 477  
gi|33285929|gb|AY223844.1| scaffold1151 96.14 285 6 3 2760  
3040 146490 146207 1e-126 460  
gi|33285929|gb|AY223844.1| scaffold1151 95.51 267 6 2 2776  
3036 306057 306323 5e-115 422  
gi|33285929|gb|AY223844.1| scaffold1151 98.13 107 2 0 2756  
2862 305952 306058 2e-44 187  
160  
gi|33285929|gb|AY223844.1| scaffold1151 81.37 161 17 4 2839  
2997 104909 105058 8e-24 119  
gi|33285929|gb|AY223844.1| scaffold1151 98.33 60 1 0 2981  
3040 183741 183800 6e-20 106  
gi|33285929|gb|AY223844.1| scaffold1096 91.39 801 61 7 1683  
2480 19537 18742 0.0 1092  
gi|33285929|gb|AY223844.1| scaffold1096 87.32 757 73 17 1713  
2458 18764 19508 0.0 845  
gi|33285929|gb|AY223844.1| scaffold1096 90.84 513 47 0 1963  
2475 303652 303140 0.0 689  
gi|33285929|gb|AY223844.1| scaffold1096 85.77 520 51 17 1700  
2206 303141 303650 3e-147 529  
gi|33285929|gb|AY223844.1| scaffold1096 98.57 279 3 1 2758  
3036 39580 39857 4e-136 492  
gi|33285929|gb|AY223844.1| scaffold1096 97.86 281 5 1 2757  
3036 13307 13587 7e-134 484  
gi|33285929|gb|AY223844.1| scaffold1096 98.53 273 4 0 2764  
3036 178095 177823 2e-133 483  
gi|33285929|gb|AY223844.1| scaffold1096 97.19 285 8 0 2751  
3035 217887 217603 2e-133 483  
gi|33285929|gb|AY223844.1| scaffold472 91.34 797 69 0 1683  
2479 147191 147987 0.0 1092  
gi|33285929|gb|AY223844.1| scaffold472 87.16 771 80 13 1700  
2459 147982 147220 0.0 859  
gi|33285929|gb|AY223844.1| scaffold472 97.23 289 6 2 2749  
3036 215180 215467 5e-135 488  
gi|33285929|gb|AY223844.1| scaffold472 97.86 280 4 2 2758  
3035 418559 418838 2e-133 483

gi|33285929|gb|AY223844.1| scaffold472 98.19 276 4 1 2755  
3029 121330 121605 9e-133 481  
gi|33285929|gb|AY223844.1| scaffold472 97.17 247 6 1 2764  
3010 52860 53105 2e-113 416  
gi|33285929|gb|AY223844.1| scaffold472 98.57 210 3 0 2830  
3039 382189 382398 5e-100 372  
gi|33285929|gb|AY223844.1| scaffold472 97.94 194 4 0 2764  
2957 381853 382046 2e-89 337  
gi|33285929|gb|AY223844.1| scaffold472 94.89 176 6 3 2753  
2926 172040 172214 6e-70 272  
gi|33285929|gb|AY223844.1| scaffold472 100.00 79 0 0  
2958 3036 53343 53421 4e-32 147  
gi|33285929|gb|AY223844.1| scaffold472 96.77 62 2 0 2975  
3036 172210 172271 2e-19 104  
gi|33285929|gb|AY223844.1| scaffold164 91.65 790 63 3 1683  
2471 541474 542261 0.0 1092  
gi|33285929|gb|AY223844.1| scaffold164 88.11 774 68 16 1699  
2459 542265 541503 0.0 900  
gi|33285929|gb|AY223844.1| scaffold164 99.26 272 2 0 2764  
3035 377075 377346 4e-136 492  
gi|33285929|gb|AY223844.1| scaffold164 97.53 283 7 0 2751  
3033 401263 401545 7e-134 484  
gi|33285929|gb|AY223844.1| scaffold164 97.54 284 4 3 2755  
3035 257874 257591 2e-133 483  
161  
gi|33285929|gb|AY223844.1| scaffold164 97.53 283 6 1 2755  
3036 433156 433438 2e-133 483  
gi|33285929|gb|AY223844.1| scaffold164 97.85 279 4 2 2761  
3037 26222 25944 9e-133 481  
gi|33285929|gb|AY223844.1| scaffold164 97.51 281 5 2 2758  
3036 243976 243696 3e-132 479  
gi|33285929|gb|AY223844.1| scaffold164 96.80 281 7 2 2758  
3036 137353 137633 7e-129 468  
gi|33285929|gb|AY223844.1| scaffold164 98.85 260 3 0 2751  
3010 400933 401192 9e-128 464  
gi|33285929|gb|AY223844.1| scaffold164 96.11 283 6 4 2758  
3036 52814 52533 1e-125 457  
gi|33285929|gb|AY223844.1| scaffold164 98.46 259 1 3 2755  
3010 424262 424520 2e-124 453  
gi|33285929|gb|AY223844.1| scaffold164 98.79 248 3 0 2764  
3011 318160 318407 4e-121 442  
gi|33285929|gb|AY223844.1| scaffold31 91.44 794 68 0 1683 2476  
405699 404906 0.0 1092  
gi|33285929|gb|AY223844.1| scaffold31 86.38 771 86 14 1700 2459  
404908 405670 0.0 826  
gi|33285929|gb|AY223844.1| scaffold31 92.32 456 35 0 2021 2476

434781 434326 0.0 651  
gi|33285929|gb|AY223844.1| scaffold31 91.64 359 27 3 1700 2055  
434328 434686 1e-136 494  
gi|33285929|gb|AY223844.1| scaffold31 97.53 283 5 2 2752 3032  
747877 747595 2e-133 483  
gi|33285929|gb|AY223844.1| scaffold31 96.52 287 7 3 2755 3038  
292959 292673 5e-130 472  
gi|33285929|gb|AY223844.1| scaffold31 96.83 284 5 4 2755 3035  
669142 668860 5e-130 472  
gi|33285929|gb|AY223844.1| scaffold31 95.74 282 10 2 2758 3037  
486396 486115 2e-124 453  
gi|33285929|gb|AY223844.1| scaffold31 95.71 280 10 2 2758 3035  
191881 192160 2e-123 449  
gi|33285929|gb|AY223844.1| scaffold31 86.72 128 16 1 2878 3004  
517845 517718 2e-30 141  
gi|33285929|gb|AY223844.1| scaffold7266 91.33 796 69 0 1681  
2476 75902 76697 0.0 1090  
gi|33285929|gb|AY223844.1| scaffold7266 87.37 768 84 11 1700  
2459 76695 75933 0.0 870  
gi|33285929|gb|AY223844.1| scaffold7266 96.53 259 7 2 2757  
3014 29253 29510 1e-116 427  
gi|33285929|gb|AY223844.1| scaffold7266 94.91 275 11 2 2765  
3036 72051 72325 1e-116 427  
gi|33285929|gb|AY223844.1| scaffold7111 91.05 816 58 10 1674  
2481 18217 17409 0.0 1090  
gi|33285929|gb|AY223844.1| scaffold7111 87.23 775 72 20 1700  
2459 17416 18178 0.0 857  
gi|33285929|gb|AY223844.1| scaffold5717 91.81 781 64 0 1691  
2471 84000 83220 0.0 1090  
gi|33285929|gb|AY223844.1| scaffold5717 87.81 763 81 10 1704  
2459 83222 83979 0.0 885  
162  
gi|33285929|gb|AY223844.1| scaffold5717 96.84 285 6 3 2755  
3036 110834 111118 1e-130 473  
gi|33285929|gb|AY223844.1| scaffold5717 77.78 126 20 6 2767  
2892 82184 82067 2e-09 71.3  
gi|33285929|gb|AY223844.1| scaffold3897 91.33 796 69 0 1683  
2478 137300 136505 0.0 1090  
gi|33285929|gb|AY223844.1| scaffold3897 88.10 756 72 13 1713  
2459 136525 137271 0.0 881  
gi|33285929|gb|AY223844.1| scaffold3897 98.23 282 2 3 2758  
3037 156819 156539 1e-135 490  
gi|33285929|gb|AY223844.1| scaffold3897 96.03 277 4 3 2747  
3016 67930 68206 1e-121 444  
gi|33285929|gb|AY223844.1| scaffold3897 97.91 239 5 0 2792  
3030 130935 131173 9e-113 414

gi|33285929|gb|AY223844.1| scaffold3897 98.40 125 2 0 2787  
2911 56569 56445 2e-54 220  
gi|33285929|gb|AY223844.1| scaffold1607 91.52 790 67 0 1687  
2476 219360 218571 0.0 1090  
gi|33285929|gb|AY223844.1| scaffold1607 92.39 657 50 0 1817  
2473 216955 216299 0.0 939  
gi|33285929|gb|AY223844.1| scaffold1607 87.55 771 73 17 1700  
2457 218573 219333 0.0 872  
gi|33285929|gb|AY223844.1| scaffold1607 86.34 659 69 15 1707  
2354 216307 216955 0.0 699  
gi|33285929|gb|AY223844.1| scaffold1607 97.15 281 6 2 2758  
3036 212395 212115 1e-130 473  
gi|33285929|gb|AY223844.1| scaffold1607 96.45 282 6 3 2755  
3032 200302 200021 3e-127 462  
gi|33285929|gb|AY223844.1| scaffold1607 95.17 290 4 5 2752  
3038 106969 107251 2e-123 449  
gi|33285929|gb|AY223844.1| scaffold1607 93.46 153 10 0 1675  
1827 217149 216997 1e-56 228  
gi|33285929|gb|AY223844.1| scaffold1607 93.10 116 8 0 2344  
2459 216997 217112 2e-39 171  
gi|33285929|gb|AY223844.1| scaffold1607 100.00 35 0 0  
3174 3208 90652 90618 1e-07 65.8  
gi|33285929|gb|AY223844.1| scaffold1607 100.00 34 0 0  
3174 3207 96351 96384 4e-07 63.9  
gi|33285929|gb|AY223844.1| scaffold1607 100.00 30 0 0  
3171 3200 89866 89895 6e-05 56.5  
gi|33285929|gb|AY223844.1| scaffold1593 91.45 795 64 4 1683  
2476 170419 169628 0.0 1090  
gi|33285929|gb|AY223844.1| scaffold1593 86.55 773 79 20 1700  
2459 169630 170390 0.0 830  
gi|33285929|gb|AY223844.1| scaffold1593 97.89 284 6 0 2751  
3034 61962 61679 4e-136 492  
gi|33285929|gb|AY223844.1| scaffold1593 98.55 276 4 0 2751  
3026 2478 2753 5e-135 488  
gi|33285929|gb|AY223844.1| scaffold1593 96.19 289 7 4 2752  
3036 182689 182977 2e-129 470  
gi|33285929|gb|AY223844.1| scaffold1593 97.51 241 6 0 2798  
3038 14470 14710 3e-112 412  
163  
gi|33285929|gb|AY223844.1| scaffold1593 95.96 198 7 1 2761  
2957 66372 66569 2e-84 320  
gi|33285929|gb|AY223844.1| scaffold1593 96.77 155 5 0 2324  
2478 255167 255321 4e-66 259  
gi|33285929|gb|AY223844.1| scaffold1593 96.71 152 4 1 2755  
2905 11567 11718 7e-64 252  
gi|33285929|gb|AY223844.1| scaffold1593 93.23 133 8 1 1714

1845 255301 255169 1e-46 195  
gi|33285929|gb|AY223844.1| scaffold1593 94.29 105 5 1 2376  
2480 255318 255421 5e-36 159  
gi|33285929|gb|AY223844.1| scaffold1593 100.00 77 0 0  
2959 3035 66795 66871 5e-31 143  
gi|33285929|gb|AY223844.1| scaffold1593 100.00 59 0 0  
2978 3036 126391 126449 5e-21 110  
gi|33285929|gb|AY223844.1| scaffold1593 90.36 83 6 2 1714  
1795 255399 255318 2e-20 108  
gi|33285929|gb|AY223844.1| scaffold1474 91.35 798 65 2 1683  
2480 171330 170537 0.0 1090  
gi|33285929|gb|AY223844.1| scaffold1474 87.06 773 77 17 1700  
2459 170543 171305 0.0 852  
gi|33285929|gb|AY223844.1| scaffold1474 99.30 285 2 0 2751  
3035 189401 189685 2e-143 516  
gi|33285929|gb|AY223844.1| scaffold1474 96.09 281 8 3 2754  
3031 251532 251252 5e-125 455  
gi|33285929|gb|AY223844.1| scaffold944 91.25 800 68 2 1679  
2476 233467 232668 0.0 1090  
gi|33285929|gb|AY223844.1| scaffold944 86.62 785 77 22 1700  
2469 232670 233441 0.0 843  
gi|33285929|gb|AY223844.1| scaffold944 97.62 294 4 3 2751  
3043 226751 226460 7e-139 501  
gi|33285929|gb|AY223844.1| scaffold944 97.41 270 7 0 2764  
3033 204545 204276 1e-126 460  
gi|33285929|gb|AY223844.1| scaffold944 91.43 70 5 1 2820  
2889 288894 288962 1e-16 95.3  
gi|33285929|gb|AY223844.1| scaffold275 91.82 782 62 1 1695  
2476 270149 269370 0.0 1090  
gi|33285929|gb|AY223844.1| scaffold275 87.95 772 70 17 1700  
2459 269372 270132 0.0 889  
gi|33285929|gb|AY223844.1| scaffold275 90.17 407 39 1 2073  
2478 331712 331306 3e-147 529  
gi|33285929|gb|AY223844.1| scaffold275 97.84 278 5 1 2755  
3031 131587 131310 3e-132 479  
gi|33285929|gb|AY223844.1| scaffold275 97.50 280 6 1 2758  
3036 289983 289704 1e-131 477  
gi|33285929|gb|AY223844.1| scaffold275 96.53 288 7 3 2754  
3038 116965 117252 1e-130 473  
gi|33285929|gb|AY223844.1| scaffold275 96.09 281 8 3 2758  
3036 138507 138228 5e-125 455  
gi|33285929|gb|AY223844.1| scaffold275 97.68 259 6 0 2777  
3035 221059 220801 3e-122 446  
gi|33285929|gb|AY223844.1| scaffold275 88.95 353 35 4 1700  
2048 331310 331662 2e-118 433

gi|33285929|gb|AY223844.1| scaffold275 97.25 255 5 2 2758  
3010 501408 501662 9e-118 431  
gi|33285929|gb|AY223844.1| scaffold275 98.85 174 2 0 2864  
3037 501663 501836 1e-81 311  
gi|33285929|gb|AY223844.1| scaffold275 85.89 163 17 5 1689  
1850 283901 283744 8e-39 169  
gi|33285929|gb|AY223844.1| scaffold275 84.44 180 17 8 2760  
2934 87785 87958 3e-38 167  
gi|33285929|gb|AY223844.1| scaffold275 97.44 39 0 1 1681  
1719 331812 331775 1e-07 65.8  
gi|33285929|gb|AY223844.1| scaffold11688 91.33 796 67 1 1683  
2478 18930 18137 0.0 1088  
gi|33285929|gb|AY223844.1| scaffold11688 87.50 768 81 11 1700  
2459 18141 18901 0.0 874  
gi|33285929|gb|AY223844.1| scaffold9596 90.60 819 77 0 1676  
2494 58508 59326 0.0 1088  
gi|33285929|gb|AY223844.1| scaffold9596 86.64 771 84 12 1700  
2459 59306 58544 0.0 837  
gi|33285929|gb|AY223844.1| scaffold9596 99.09 220 2 0 2814  
3033 34774 34993 3e-107 396  
gi|33285929|gb|AY223844.1| scaffold9596 98.08 156 3 0 2751  
2906 15701 15546 6e-70 272  
gi|33285929|gb|AY223844.1| scaffold7531 91.26 801 65 4 1679  
2478 18253 19049 0.0 1088  
gi|33285929|gb|AY223844.1| scaffold7531 87.31 772 74 17 1700  
2459 19045 18286 0.0 863  
gi|33285929|gb|AY223844.1| scaffold7531 96.54 289 2 6 2751  
3036 84049 84332 5e-130 472  
gi|33285929|gb|AY223844.1| scaffold7531 100.00 33 0 0  
3174 3206 70094 70126 1e-06 62.1  
gi|33285929|gb|AY223844.1| scaffold7531 97.06 34 0 1 3168  
3200 70844 70811 6e-05 56.5  
gi|33285929|gb|AY223844.1| scaffold6564 91.91 779 60 1 1683  
2458 79476 78698 0.0 1088  
gi|33285929|gb|AY223844.1| scaffold6564 87.42 755 78 11 1713  
2457 78698 79445 0.0 854  
gi|33285929|gb|AY223844.1| scaffold6564 96.80 281 7 2 2758  
3036 109718 109998 7e-129 468  
gi|33285929|gb|AY223844.1| scaffold3428 92.49 759 57 0 1721  
2479 136191 135433 0.0 1088  
gi|33285929|gb|AY223844.1| scaffold3428 88.46 797 69 17 1693  
2476 135431 136217 0.0 941  
gi|33285929|gb|AY223844.1| scaffold3428 90.59 425 39 1 2036  
2459 139238 138814 8e-158 564  
gi|33285929|gb|AY223844.1| scaffold3428 92.67 382 28 0 1758  
2139 49322 49703 2e-154 553

gi|33285929|gb|AY223844.1| scaffold3428 90.43 376 35 1 1681  
2055 138783 139158 1e-136 494  
gi|33285929|gb|AY223844.1| scaffold3428 98.18 275 5 0 2764  
3038 3406 3132 9e-133 481  
gi|33285929|gb|AY223844.1| scaffold3428 97.18 284 5 3 2754  
3035 8717 8999 1e-131 477  
165  
gi|33285929|gb|AY223844.1| scaffold3428 96.84 285 9 0 2751  
3035 49326 49042 1e-131 477  
gi|33285929|gb|AY223844.1| scaffold3428 90.26 349 31 3 1700  
2045 140188 139840 2e-124 453  
gi|33285929|gb|AY223844.1| scaffold3428 88.95 353 35 4 2126  
2476 139840 140190 2e-118 433  
gi|33285929|gb|AY223844.1| scaffold3428 90.94 298 27 0 2116  
2413 49619 49322 7e-109 401  
gi|33285929|gb|AY223844.1| scaffold3428 98.56 139 2 0 2898  
3036 54032 54170 3e-62 246  
gi|33285929|gb|AY223844.1| scaffold3428 89.47 76 8 0 2401  
2476 49039 48964 4e-17 97.1  
gi|33285929|gb|AY223844.1| scaffold3428 86.49 74 7 3 1700  
1770 48966 49039 1e-11 78.7  
gi|33285929|gb|AY223844.1| scaffold2239 91.45 795 62 6 1684  
2476 160584 161374 0.0 1088  
gi|33285929|gb|AY223844.1| scaffold2239 87.16 763 77 16 1707  
2459 161363 160612 0.0 848  
gi|33285929|gb|AY223844.1| scaffold2239 98.53 273 4 0 2764  
3036 83221 83493 2e-133 483  
gi|33285929|gb|AY223844.1| scaffold2239 98.53 273 4 0 2764  
3036 145133 144861 2e-133 483  
gi|33285929|gb|AY223844.1| scaffold2239 96.74 276 9 0 2761  
3036 193269 192994 1e-126 460  
gi|33285929|gb|AY223844.1| scaffold2239 85.64 397 42 6 1683  
2077 87178 87561 5e-110 405  
gi|33285929|gb|AY223844.1| scaffold2239 86.63 344 33 6 2116  
2459 87537 87207 7e-99 368  
gi|33285929|gb|AY223844.1| scaffold10188 91.32 795 68 1 1683  
2476 6693 7487 0.0 1086  
gi|33285929|gb|AY223844.1| scaffold10188 87.85 757 72 15 1713  
2459 7469 6723 0.0 870  
gi|33285929|gb|AY223844.1| scaffold9072 91.31 794 69 0 1683  
2476 50214 51007 0.0 1086  
gi|33285929|gb|AY223844.1| scaffold9072 87.19 773 76 16 1700  
2459 51005 50243 0.0 859  
gi|33285929|gb|AY223844.1| scaffold9072 97.40 269 5 2 2764  
3031 17763 17496 1e-125 457  
gi|33285929|gb|AY223844.1| scaffold6319 91.16 803 66 2 1673



2475 98365 99162 0.0 1086  
gi|33285929|gb|AY223844.1| scaffold6319 86.36 770 83 13 1700  
2459 99161 98404 0.0 822  
gi|33285929|gb|AY223844.1| scaffold6319 96.83 126 4 0 1753  
1878 1779 1904 1e-51 211  
gi|33285929|gb|AY223844.1| scaffold6319 96.00 125 5 0 2294  
2418 1903 1779 2e-49 204  
gi|33285929|gb|AY223844.1| scaffold6319 85.63 167 21 3 2306  
2471 10599 10435 6e-40 172  
gi|33285929|gb|AY223844.1| scaffold6319 89.13 138 11 4 1717  
1852 10452 10587 8e-39 169  
gi|33285929|gb|AY223844.1| scaffold3098 91.22 797 70 0 1683  
2479 34610 35406 0.0 1086  
166  
gi|33285929|gb|AY223844.1| scaffold3098 87.63 768 82 9 1700  
2459 35401 34639 0.0 881  
gi|33285929|gb|AY223844.1| scaffold3098 98.57 279 3 1 2758  
3035 102289 102011 4e-136 492  
gi|33285929|gb|AY223844.1| scaffold3098 98.22 281 4 1 2756  
3035 26184 25904 1e-135 490  
gi|33285929|gb|AY223844.1| scaffold3098 98.53 272 2 2 2758  
3029 50378 50647 3e-132 479  
gi|33285929|gb|AY223844.1| scaffold3098 97.51 281 5 2 2758  
3036 97192 96912 3e-132 479  
gi|33285929|gb|AY223844.1| scaffold3054 92.40 763 55 3 1700  
2459 12452 11690 0.0 1086  
gi|33285929|gb|AY223844.1| scaffold3054 88.81 804 70 14 1683  
2476 11661 12454 0.0 968  
gi|33285929|gb|AY223844.1| scaffold3054 87.25 149 18 1 2834  
2982 193211 193064 8e-39 169  
gi|33285929|gb|AY223844.1| scaffold1908 90.94 806 73 0 1676  
2481 120565 119760 0.0 1086  
gi|33285929|gb|AY223844.1| scaffold1908 86.62 755 85 11 1713  
2459 119783 120529 0.0 822  
gi|33285929|gb|AY223844.1| scaffold1908 98.60 286 2 2 2755  
3040 145507 145224 5e-140 505  
gi|33285929|gb|AY223844.1| scaffold1908 98.21 280 2 3 2758  
3034 95458 95179 2e-134 486  
gi|33285929|gb|AY223844.1| scaffold1908 95.68 278 10 2 2758  
3033 121851 121574 3e-122 446  
gi|33285929|gb|AY223844.1| scaffold1908 92.31 52 3 1 2752  
2802 217956 218007 6e-10 73.1  
gi|33285929|gb|AY223844.1| scaffold1908 100.00 35 0 0  
3174 3208 2003 1969 1e-07 65.8  
gi|33285929|gb|AY223844.1| scaffold1307 92.40 763 55 3 1700  
2459 35024 35786 0.0 1086

gi|33285929|gb|AY223844.1| scaffold1307 89.80 794 66 6 1683  
2476 304344 303566 0.0 1005  
gi|33285929|gb|AY223844.1| scaffold1307 89.32 805 68 14 1683  
2478 35815 35020 0.0 994  
gi|33285929|gb|AY223844.1| scaffold1307 86.21 776 72 24 1696  
2459 303563 304315 0.0 808  
gi|33285929|gb|AY223844.1| scaffold1307 90.58 361 33 1 1683  
2042 28796 28436 1e-131 477  
gi|33285929|gb|AY223844.1| scaffold1307 97.77 269 6 0 2764  
3032 205336 205068 9e-128 464  
gi|33285929|gb|AY223844.1| scaffold1307 95.82 287 3 4 2758  
3035 111343 111057 5e-125 455  
gi|33285929|gb|AY223844.1| scaffold1307 91.24 331 29 0 2129  
2459 28436 28766 7e-124 451  
gi|33285929|gb|AY223844.1| scaffold1307 96.48 256 8 1 2755  
3009 173692 173437 5e-115 422  
gi|33285929|gb|AY223844.1| scaffold1307 100.00 111 0 0  
2925 3035 58000 57890 6e-50 206  
gi|33285929|gb|AY223844.1| scaffold1099 91.22 797 70 0 1683  
2479 148610 149406 0.0 1086  
167  
gi|33285929|gb|AY223844.1| scaffold1099 87.18 772 78 15 1700  
2459 149401 148639 0.0 859  
gi|33285929|gb|AY223844.1| scaffold1099 95.32 278 10 3 2758  
3032 118238 117961 5e-120 438  
gi|33285929|gb|AY223844.1| scaffold1099 95.57 271 8 2 2764  
3030 221292 221022 9e-118 431  
gi|33285929|gb|AY223844.1| scaffold1099 84.52 252 38 1 2752  
3002 278150 278401 9e-63 248  
gi|33285929|gb|AY223844.1| scaffold1099 87.50 208 25 1 2781  
2988 275021 274815 6e-60 239  
gi|33285929|gb|AY223844.1| scaffold1099 99.08 109 1 0 2753  
2861 187691 187799 3e-47 196  
gi|33285929|gb|AY223844.1| scaffold1099 99.02 102 1 0 2892  
2993 187798 187899 3e-43 183  
gi|33285929|gb|AY223844.1| scaffold1099 80.38 158 17 6 2760  
2909 109351 109200 2e-20 108  
gi|33285929|gb|AY223844.1| scaffold929 91.32 795 68 1 1683  
2476 283998 283204 0.0 1086  
gi|33285929|gb|AY223844.1| scaffold929 88.87 773 57 9 1681  
2453 120015 119272 0.0 926  
gi|33285929|gb|AY223844.1| scaffold929 86.90 771 83 13 1700  
2459 283206 283969 0.0 850  
gi|33285929|gb|AY223844.1| scaffold929 86.69 744 69 14 1717  
2459 119271 119985 0.0 800  
gi|33285929|gb|AY223844.1| scaffold929 98.25 286 5 0 2751

3036 287591 287306 7e-139 501  
gi|33285929|gb|AY223844.1| scaffold929 97.19 285 5 3 2755  
3036 70071 69787 3e-132 479  
gi|33285929|gb|AY223844.1| scaffold929 99.08 218 2 0 2819  
3036 105710 105493 4e-106 392  
gi|33285929|gb|AY223844.1| scaffold929 100.00 79 0 0  
2957 3035 94667 94589 4e-32 147  
gi|33285929|gb|AY223844.1| scaffold929 96.34 82 2 1 2754  
2835 95128 95048 3e-28 134  
gi|33285929|gb|AY223844.1| scaffold929 96.83 63 0 2 2758  
2818 108565 108503 2e-19 104  
gi|33285929|gb|AY223844.1| scaffold352 91.35 798 61 5 1681  
2476 45440 44649 0.0 1086  
gi|33285929|gb|AY223844.1| scaffold352 87.86 774 65 21 1700  
2459 44651 45409 0.0 881  
gi|33285929|gb|AY223844.1| scaffold352 98.95 287 3 0 2751  
3037 216324 216038 8e-143 514  
gi|33285929|gb|AY223844.1| scaffold352 98.27 289 2 1 2751  
3036 215304 215592 2e-139 503  
gi|33285929|gb|AY223844.1| scaffold352 97.91 287 6 0 2751  
3037 359601 359315 9e-138 497  
gi|33285929|gb|AY223844.1| scaffold352 95.83 288 8 4 2752  
3035 299451 299164 3e-127 462  
gi|33285929|gb|AY223844.1| scaffold352 92.68 287 5 7 2752  
3035 477482 477755 2e-108 399  
gi|33285929|gb|AY223844.1| scaffold352 99.35 155 1 0 2878  
3032 268409 268255 9e-73 281  
168  
gi|33285929|gb|AY223844.1| scaffold352 92.81 167 11 1 1683  
1849 424149 423984 2e-60 241  
gi|33285929|gb|AY223844.1| scaffold352 95.42 131 6 0 2322  
2452 423984 424114 4e-51 209  
gi|33285929|gb|AY223844.1| scaffold350 91.35 798 62 1 1681  
2471 238451 237654 0.0 1086  
gi|33285929|gb|AY223844.1| scaffold350 87.47 750 74 14 1720  
2459 237674 238413 0.0 846  
gi|33285929|gb|AY223844.1| scaffold350 90.75 389 34 2 2071  
2459 404871 404485 7e-144 518  
gi|33285929|gb|AY223844.1| scaffold350 91.42 373 31 1 1683  
2055 404456 404827 1e-141 510  
gi|33285929|gb|AY223844.1| scaffold350 98.57 280 3 1 2758  
3036 191476 191197 1e-136 494  
gi|33285929|gb|AY223844.1| scaffold350 99.26 272 2 0 2764  
3035 121518 121789 4e-136 492  
gi|33285929|gb|AY223844.1| scaffold350 98.21 279 5 0 2758  
3036 286679 286401 5e-135 488

gi|33285929|gb|AY223844.1| scaffold350 95.74 305 9 4 2744  
3046 299690 299388 5e-135 488  
gi|33285929|gb|AY223844.1| scaffold350 97.53 283 5 2 2757  
3037 328375 328093 2e-133 483  
gi|33285929|gb|AY223844.1| scaffold350 97.53 283 6 1 2755  
3036 464748 465030 2e-133 483  
gi|33285929|gb|AY223844.1| scaffold350 97.47 277 3 3 2761  
3033 330530 330806 2e-129 470  
gi|33285929|gb|AY223844.1| scaffold350 95.80 286 9 3 2755  
3037 74419 74134 4e-126 459  
gi|33285929|gb|AY223844.1| scaffold350 94.14 290 9 5 2754  
3036 435692 435980 7e-119 435  
gi|33285929|gb|AY223844.1| scaffold350 95.22 272 10 2 2761  
3029 337690 337961 1e-116 427  
gi|33285929|gb|AY223844.1| scaffold350 95.77 142 4 2 2758  
2897 287724 287583 1e-56 228  
gi|33285929|gb|AY223844.1| scaffold350 91.43 140 12 0 2337  
2476 404879 405018 5e-46 193  
gi|33285929|gb|AY223844.1| scaffold350 89.86 138 11 3 1700  
1834 405016 404879 2e-40 174  
gi|33285929|gb|AY223844.1| scaffold350 92.56 121 6 3 2758  
2876 5511 5392 2e-39 171  
gi|33285929|gb|AY223844.1| scaffold350 100.00 36 0 0  
3173 3208 2360 2325 3e-08 67.6  
gi|33285929|gb|AY223844.1| scaffold350 100.00 33 0 0  
3174 3206 300986 300954 1e-06 62.1  
gi|33285929|gb|AY223844.1| scaffold350 100.00 33 0 0  
3174 3206 391454 391486 1e-06 62.1  
gi|33285929|gb|AY223844.1| scaffold350 100.00 28 0 0  
3173 3200 392247 392220 8e-04 52.8  
gi|33285929|gb|AY223844.1| scaffold265 92.41 764 53 5 1700  
2459 388686 387924 0.0 1086  
gi|33285929|gb|AY223844.1| scaffold265 89.27 811 82 3 1675  
2481 466658 465849 0.0 1035  
169  
gi|33285929|gb|AY223844.1| scaffold265 88.68 804 71 14 1683  
2476 387895 388688 0.0 963  
gi|33285929|gb|AY223844.1| scaffold265 86.23 777 79 19 1700  
2459 465856 466621 0.0 841  
gi|33285929|gb|AY223844.1| scaffold265 98.94 282 3 0 2755  
3036 588310 588591 5e-140 505  
gi|33285929|gb|AY223844.1| scaffold265 98.59 284 4 0 2750  
3033 514484 514767 2e-139 503  
gi|33285929|gb|AY223844.1| scaffold265 97.90 286 3 3 2754  
3036 238834 238549 4e-136 492  
gi|33285929|gb|AY223844.1| scaffold265 97.86 280 5 1 2758

3036 114186 113907 2e-133 483  
gi|33285929|gb|AY223844.1| scaffold265 97.81 274 6 0 2758  
3031 484550 484823 1e-130 473  
gi|33285929|gb|AY223844.1| scaffold265 96.80 281 7 2 2756  
3034 126463 126183 7e-129 468  
gi|33285929|gb|AY223844.1| scaffold265 95.02 281 8 2 2755  
3034 247771 247496 2e-119 436  
gi|33285929|gb|AY223844.1| scaffold265 93.70 238 10 5 2755  
2988 611556 611320 7e-94 351  
gi|33285929|gb|AY223844.1| scaffold265 94.20 69 4 0 2784  
2852 52223 52291 6e-20 106  
gi|33285929|gb|AY223844.1| scaffold14066 91.32 795 66 3 1683  
2476 25300 24508 0.0 1085  
gi|33285929|gb|AY223844.1| scaffold14066 87.71 773 71 20 1700  
2459 24510 25271 0.0 881  
gi|33285929|gb|AY223844.1| scaffold12634 90.94 806 72 1 1672  
2476 14844 15649 0.0 1085  
gi|33285929|gb|AY223844.1| scaffold12634 87.26 769 79 13 1700  
2457 15647 14887 0.0 861  
gi|33285929|gb|AY223844.1| scaffold11191 91.22 797 68 2 1681  
2476 42773 41978 0.0 1085  
gi|33285929|gb|AY223844.1| scaffold11191 86.79 772 81 14 1700  
2459 41980 42742 0.0 843  
gi|33285929|gb|AY223844.1| scaffold11191 91.39 418 36 0 2061  
2478 50872 50455 1e-160 573  
gi|33285929|gb|AY223844.1| scaffold11191 92.06 378 27 2 1683  
2057 23122 22745 3e-147 529  
gi|33285929|gb|AY223844.1| scaffold11191 91.19 352 28 3 1700  
2048 50459 50810 4e-131 475  
gi|33285929|gb|AY223844.1| scaffold11191 96.44 281 8 2 2758  
3036 12036 12316 3e-127 462  
gi|33285929|gb|AY223844.1| scaffold11191 89.34 347 34 2 2116  
2459 22747 23093 2e-118 433  
gi|33285929|gb|AY223844.1| scaffold11191 90.25 277 7 9 2751  
3025 5547 5805 1e-91 344  
gi|33285929|gb|AY223844.1| scaffold11191 95.88 97 4 0 2059  
2155 19265 19169 2e-35 158  
gi|33285929|gb|AY223844.1| scaffold7503 91.31 794 68 1 1683  
2476 46697 47489 0.0 1085  
gi|33285929|gb|AY223844.1| scaffold7503 87.81 755 75 10 1713  
2459 47471 46726 0.0 870  
170  
gi|33285929|gb|AY223844.1| scaffold7503 96.43 280 8 2 2758  
3035 83804 84083 1e-126 460  
gi|33285929|gb|AY223844.1| scaffold7503 95.06 263 7 3 2764  
3026 127397 127653 4e-111 409

gi|33285929|gb|AY223844.1| scaffold7503 94.44 252 8 3 2779  
3030 128508 128753 2e-103 383  
gi|33285929|gb|AY223844.1| scaffold7503 83.45 139 22 1 2760  
2898 100946 101083 1e-26 128  
gi|33285929|gb|AY223844.1| scaffold5972 91.22 797 68 2 1683  
2479 94698 93904 0.0 1085  
gi|33285929|gb|AY223844.1| scaffold5972 86.87 769 84 13 1700  
2459 93909 94669 0.0 845  
gi|33285929|gb|AY223844.1| scaffold5972 99.26 271 2 0 2764  
3034 88723 88993 1e-135 490  
gi|33285929|gb|AY223844.1| scaffold5972 97.86 281 6 0 2754  
3034 22954 23234 2e-134 486  
gi|33285929|gb|AY223844.1| scaffold5972 98.55 275 3 1 2758  
3032 43235 42962 7e-134 484  
gi|33285929|gb|AY223844.1| scaffold5972 95.53 291 12 1 2755  
3045 44125 43836 9e-128 464  
gi|33285929|gb|AY223844.1| scaffold5437 91.36 799 57 9 1683  
2476 68155 67364 0.0 1085  
gi|33285929|gb|AY223844.1| scaffold5437 88.49 756 67 15 1713  
2459 67382 68126 0.0 898  
gi|33285929|gb|AY223844.1| scaffold3698 91.89 777 59 3 1683  
2459 3566 2794 0.0 1085  
gi|33285929|gb|AY223844.1| scaffold3698 87.02 786 80 14 1683  
2459 2765 3537 0.0 867  
gi|33285929|gb|AY223844.1| scaffold3698 98.91 275 3 0 2764  
3038 87699 87973 4e-136 492  
gi|33285929|gb|AY223844.1| scaffold3698 97.83 277 5 1 2761  
3036 35468 35192 1e-131 477  
gi|33285929|gb|AY223844.1| scaffold2654 91.22 797 68 2 1681  
2476 161572 162367 0.0 1085  
gi|33285929|gb|AY223844.1| scaffold2654 86.79 772 81 14 1700  
2459 162365 161603 0.0 843  
gi|33285929|gb|AY223844.1| scaffold2654 97.24 290 6 2 2749  
3036 183713 183424 1e-135 490  
gi|33285929|gb|AY223844.1| scaffold1951 91.23 798 66 4 1681  
2476 240759 239964 0.0 1085  
gi|33285929|gb|AY223844.1| scaffold1951 87.34 774 73 19 1700  
2459 239966 240728 0.0 863  
gi|33285929|gb|AY223844.1| scaffold1951 99.29 280 2 0 2756  
3035 153442 153163 1e-140 507  
gi|33285929|gb|AY223844.1| scaffold1951 97.88 283 6 0 2754  
3036 168883 168601 1e-135 490  
gi|33285929|gb|AY223844.1| scaffold1951 96.49 285 10 0 2751  
3035 142459 142743 5e-130 472  
gi|33285929|gb|AY223844.1| scaffold1951 96.50 286 7 3 2752  
3035 36346 36062 2e-129 470

gi|33285929|gb|AY223844.1| scaffold1951 93.86 114 4 3 2755  
2865 25575 25462 8e-39 169  
171  
gi|33285929|gb|AY223844.1| scaffold1873 91.24 799 65 4 1683  
2476 134396 133598 0.0 1085  
gi|33285929|gb|AY223844.1| scaffold1873 87.23 775 74 18 1700  
2459 133600 134364 0.0 859  
gi|33285929|gb|AY223844.1| scaffold1873 98.52 203 3 0 2833  
3035 71533 71735 4e-96 359  
gi|33285929|gb|AY223844.1| scaffold1873 93.16 117 6 2 2748  
2862 210 326 2e-39 171  
gi|33285929|gb|AY223844.1| scaffold1873 100.00 48 0 0  
2764 2811 71491 71538 6e-15 89.8  
gi|33285929|gb|AY223844.1| scaffold1466 91.21 796 70 0 1681  
2476 217740 218535 0.0 1085  
gi|33285929|gb|AY223844.1| scaffold1466 86.38 771 86 13 1700  
2459 218533 217771 0.0 826  
gi|33285929|gb|AY223844.1| scaffold1466 97.88 283 4 2 2758  
3038 72432 72150 5e-135 488  
gi|33285929|gb|AY223844.1| scaffold1466 97.25 291 3 2 2751  
3036 287175 287465 5e-135 488  
gi|33285929|gb|AY223844.1| scaffold1466 96.40 278 9 1 2758  
3035 102059 101783 1e-125 457  
gi|33285929|gb|AY223844.1| scaffold1466 96.32 272 8 2 2758  
3028 168044 168314 3e-122 446  
gi|33285929|gb|AY223844.1| scaffold1466 91.82 110 9 0 2896  
3005 227258 227149 2e-34 154  
gi|33285929|gb|AY223844.1| scaffold1466 88.89 81 8 1 2763  
2842 66897 66977 1e-17 99.0  
gi|33285929|gb|AY223844.1| scaffold693 91.87 775 63 0 1683  
2457 220503 219729 0.0 1085  
gi|33285929|gb|AY223844.1| scaffold693 88.92 785 66 16 1683  
2457 219699 220472 0.0 950  
gi|33285929|gb|AY223844.1| scaffold693 97.87 282 4 2 2758  
3037 322956 322675 2e-134 486  
gi|33285929|gb|AY223844.1| scaffold693 98.53 273 4 0 2764  
3036 76425 76697 2e-133 483  
gi|33285929|gb|AY223844.1| scaffold693 98.53 273 3 1 2764  
3035 372327 372599 9e-133 481  
gi|33285929|gb|AY223844.1| scaffold693 97.06 272 8 0 2764  
3035 161808 162079 4e-126 459  
gi|33285929|gb|AY223844.1| scaffold693 95.80 286 9 3 2755  
3037 384832 384547 4e-126 459  
gi|33285929|gb|AY223844.1| scaffold693 96.68 271 7 2 2758  
3026 152565 152835 2e-123 449  
gi|33285929|gb|AY223844.1| scaffold693 96.26 187 2 5 2752

2934 158824 159009 7e-79 302  
gi|33285929|gb|AY223844.1| scaffold693 100.00 33 0 0  
3176 3208 184309 184341 1e-06 62.1  
gi|33285929|gb|AY223844.1| scaffold650 91.79 780 60 4 1700  
2476 218650 217872 0.0 1085  
gi|33285929|gb|AY223844.1| scaffold650 86.17 788 89 14 1700  
2476 217874 218652 0.0 835  
gi|33285929|gb|AY223844.1| scaffold650 98.25 285 2 3 2755  
3036 227172 227456 3e-137 496  
172  
gi|33285929|gb|AY223844.1| scaffold650 98.23 283 3 2 2755  
3035 166333 166051 1e-136 494  
gi|33285929|gb|AY223844.1| scaffold650 98.72 156 2 0 2764  
2919 48969 49124 1e-71 278  
gi|33285929|gb|AY223844.1| scaffold650 88.02 167 19 1 2839  
3005 16567 16732 3e-47 196  
gi|33285929|gb|AY223844.1| scaffold650 100.00 34 0 0  
3173 3206 388617 388650 4e-07 63.9  
gi|33285929|gb|AY223844.1| scaffold357 91.31 794 68 1 1683  
2476 460006 459214 0.0 1085  
gi|33285929|gb|AY223844.1| scaffold357 86.64 771 83 14 1700  
2459 459216 459977 0.0 835  
gi|33285929|gb|AY223844.1| scaffold357 98.97 291 2 1 2751  
3040 305027 305317 2e-144 520  
gi|33285929|gb|AY223844.1| scaffold357 99.63 269 1 0 2764  
3032 293472 293740 4e-136 492  
gi|33285929|gb|AY223844.1| scaffold357 97.11 277 6 2 2756  
3030 351216 351492 2e-128 466  
gi|33285929|gb|AY223844.1| scaffold357 95.22 293 10 4 2755  
3043 214329 214621 1e-126 460  
gi|33285929|gb|AY223844.1| scaffold357 91.84 282 8 5 2758  
3037 394400 394132 3e-102 379  
gi|33285929|gb|AY223844.1| scaffold357 97.45 196 4 1 2758  
2952 58480 58285 3e-88 333  
gi|33285929|gb|AY223844.1| scaffold357 98.95 95 1 0 2942  
3036 58093 57999 2e-39 171  
gi|33285929|gb|AY223844.1| scaffold357 89.69 97 8 2 3194  
3290 109741 109647 6e-25 122  
gi|33285929|gb|AY223844.1| scaffold7494 91.39 790 67 1 1683  
2471 57475 58264 0.0 1083  
gi|33285929|gb|AY223844.1| scaffold7494 87.22 767 79 13 1704  
2459 58262 57504 0.0 857  
gi|33285929|gb|AY223844.1| scaffold5094 92.06 768 61 0 1683  
2450 35436 36203 0.0 1083  
gi|33285929|gb|AY223844.1| scaffold5094 87.33 750 73 17 1721  
2459 36203 35465 0.0 839



gi|33285929|gb|AY223844.1| scaffold3141 92.08 770 58 3 1693  
2459 163833 163064 0.0 1083  
gi|33285929|gb|AY223844.1| scaffold3141 88.75 809 71 14 1681  
2479 163033 163831 0.0 972  
gi|33285929|gb|AY223844.1| scaffold3141 98.23 282 3 2 2758  
3037 16806 16525 4e-136 492  
gi|33285929|gb|AY223844.1| scaffold3141 99.26 272 2 0 2764  
3035 40906 41177 4e-136 492  
gi|33285929|gb|AY223844.1| scaffold3141 98.91 275 3 0 2764  
3038 173494 173220 4e-136 492  
gi|33285929|gb|AY223844.1| scaffold3141 97.56 287 5 2 2751  
3036 59561 59846 1e-135 490  
gi|33285929|gb|AY223844.1| scaffold3141 96.40 222 4 4 2755  
2972 172116 172337 3e-97 363  
gi|33285929|gb|AY223844.1| scaffold3141 95.16 124 6 0 2754  
2877 115897 115774 3e-47 196  
173  
gi|33285929|gb|AY223844.1| scaffold2163 90.84 808 72 1 1674  
2481 204423 205228 0.0 1083  
gi|33285929|gb|AY223844.1| scaffold2163 86.46 768 81 16 1700  
2455 205221 204465 0.0 822  
gi|33285929|gb|AY223844.1| scaffold2163 92.39 394 29 1 2062  
2455 216218 216610 1e-156 560  
gi|33285929|gb|AY223844.1| scaffold2163 91.96 373 29 1 1683  
2055 216643 216272 5e-145 521  
gi|33285929|gb|AY223844.1| scaffold2163 98.92 279 3 0 2757  
3035 152723 152445 2e-138 499  
gi|33285929|gb|AY223844.1| scaffold2163 97.15 281 5 3 2758  
3035 100712 100432 5e-130 472  
gi|33285929|gb|AY223844.1| scaffold2163 96.71 243 7 1 2758  
2999 86262 86020 2e-109 403  
gi|33285929|gb|AY223844.1| scaffold2163 95.58 249 9 2 2757  
3004 60761 60514 9e-108 398  
gi|33285929|gb|AY223844.1| scaffold2163 96.19 236 5 3 2758  
2992 65770 66002 2e-103 383  
gi|33285929|gb|AY223844.1| scaffold2163 98.00 50 1 0 2987  
3036 66705 66754 2e-14 87.9  
gi|33285929|gb|AY223844.1| scaffold2163 100.00 35 0 0  
3174 3208 232480 232514 1e-07 65.8  
gi|33285929|gb|AY223844.1| scaffold1870 91.21 796 68 1 1683  
2476 76137 75342 0.0 1083  
gi|33285929|gb|AY223844.1| scaffold1870 90.25 810 61 4 1683  
2476 140666 141473 0.0 1046  
gi|33285929|gb|AY223844.1| scaffold1870 87.05 772 79 16 1700  
2459 75344 76106 0.0 852  
gi|33285929|gb|AY223844.1| scaffold1870 85.80 789 72 20 1700

2459 141471 140694 0.0 802  
gi|33285929|gb|AY223844.1| scaffold1870 98.57 279 4 0 2758  
3036 95295 95017 1e-136 494  
gi|33285929|gb|AY223844.1| scaffold1870 96.48 284 7 3 2754  
3035 86180 85898 2e-128 466  
gi|33285929|gb|AY223844.1| scaffold1870 96.92 260 5 3 2753  
3010 17929 17671 2e-118 433  
gi|33285929|gb|AY223844.1| scaffold1870 98.73 237 3 0 2801  
3037 191975 191739 5e-115 422

BLASTN 2.2.28+

Query: gi|33347862|gb|AF411835.1| Aedes albopictus cell fusing  
agent  
virus polyprotein-like protein and agCP8252-like protein genes,  
complete cds

Fields: query id, subject id, % identity, alignment length,  
mismatches, gap opens, q. start, q. end, s. start, s. end, evaluate,  
bit  
score

1097 hits found

gi|33347862|gb|AF411835.1| scaffold14636 98.46 6101 47 21 4517  
10587 8576 14659 0.0 1.070e+04  
gi|33347862|gb|AF411835.1| scaffold14636 99.48 1357 6 1 7792  
9148 22137 23492 0.0 2466  
174  
gi|33347862|gb|AF411835.1| scaffold14636 98.49 1060 13 2 1823  
2881 5533 6590 0.0 1866  
gi|33347862|gb|AF411835.1| scaffold14636 100.00 984 0 0  
3123 4106 7034 8017 0.0 1818  
gi|33347862|gb|AF411835.1| scaffold14636 97.73 528 1 5 4104  
4620 8051 8578 0.0 898  
gi|33347862|gb|AF411835.1| scaffold14636 98.58 422 6 0 10  
431 3918 4339 0.0 747  
gi|33347862|gb|AF411835.1| scaffold14636 99.41 340 1 1 2784  
3123 6591 6929 7e-173 616  
gi|33347862|gb|AF411835.1| scaffold14636 99.36 313 2 0 4837  
5149 3592 3904 2e-158 568  
gi|33347862|gb|AF411835.1| scaffold14636 95.40 326 15 0 9523  
9848 13512 13837 6e-144 520  
gi|33347862|gb|AF411835.1| scaffold14636 95.40 326 15 0 9455  
9780 13580 13905 6e-144 520  
gi|33347862|gb|AF411835.1| scaffold14636 94.57 258 14 0 9591  
9848 13512 13769 8e-108 399  
gi|33347862|gb|AF411835.1| scaffold14636 94.57 258 14 0 9455  
9712 13648 13905 8e-108 399  
gi|33347862|gb|AF411835.1| scaffold14636 94.24 191 9 2 9455

9644 13716 13905 5e-75 291  
gi|33347862|gb|AF411835.1| scaffold14636 93.72 191 10 2 9659  
9848 13512 13701 2e-73 285  
gi|33347862|gb|AF411835.1| scaffold14636 92.06 126 9 1 9724  
9848 13508 13633 1e-40 176  
gi|33347862|gb|AF411835.1| scaffold14636 92.06 126 9 1 9451  
9576 13781 13905 1e-40 176  
gi|33347862|gb|AF411835.1| scaffold14636 88.36 146 16 1 8872  
9016 23020 23165 5e-40 174  
gi|33347862|gb|AF411835.1| scaffold14636 88.36 146 16 1 8675  
8820 23217 23361 5e-40 174  
gi|33347862|gb|AF411835.1| scaffold1762 99.26 1349 9 1 7799  
9146 40130 41478 0.0 2435  
gi|33347862|gb|AF411835.1| scaffold1762 95.66 1360 52 6 7792  
9146 50535 51892 0.0 2178  
gi|33347862|gb|AF411835.1| scaffold1762 95.77 496 6 5 10107  
10587 42500 42995 0.0 785  
gi|33347862|gb|AF411835.1| scaffold1762 95.89 146 6 0 8675  
8820 51616 51761 7e-59 237  
gi|33347862|gb|AF411835.1| scaffold1762 89.04 146 15 1 8872  
9016 41006 41151 1e-41 180  
gi|33347862|gb|AF411835.1| scaffold1762 88.36 146 16 1 8675  
8820 41203 41347 5e-40 174  
gi|33347862|gb|AF411835.1| scaffold6867 98.62 1302 14 3 1823  
3123 40953 39655 0.0 2302  
gi|33347862|gb|AF411835.1| scaffold6867 100.00 984 0 0  
3123 4106 39550 38567 0.0 1818  
gi|33347862|gb|AF411835.1| scaffold6867 99.86 739 1 0 4104  
4842 38533 37795 0.0 1360  
gi|33347862|gb|AF411835.1| scaffold6867 99.03 413 4 0 1  
413 42287 41875 0.0 741  
175  
gi|33347862|gb|AF411835.1| scaffold4062 96.81 1346 38 4 7801  
9143 91075 92418 0.0 2242  
gi|33347862|gb|AF411835.1| scaffold4062 95.18 166 7 1 915  
1079 81946 82111 4e-66 261  
gi|33347862|gb|AF411835.1| scaffold4062 89.31 159 13 3 915  
1071 82101 81945 1e-46 196  
gi|33347862|gb|AF411835.1| scaffold4062 89.73 146 14 1 8675  
8820 92147 92291 2e-43 185  
gi|33347862|gb|AF411835.1| scaffold1863 95.61 1229 48 5 7792  
9016 46836 45610 0.0 1965  
gi|33347862|gb|AF411835.1| scaffold1863 99.36 469 3 0 8675  
9143 45755 45287 0.0 850  
gi|33347862|gb|AF411835.1| scaffold1863 96.36 275 10 0 9576  
9850 53818 53544 6e-124 453

gi|33347862|gb|AF411835.1| scaffold1863 96.34 273 10 0 9508  
9780 53818 53546 8e-123 449  
gi|33347862|gb|AF411835.1| scaffold1863 96.09 281 0 3 8879  
9159 54175 53906 3e-122 448  
gi|33347862|gb|AF411835.1| scaffold1863 94.66 262 13 1 9451  
9712 53806 53546 2e-109 405  
gi|33347862|gb|AF411835.1| scaffold1863 96.10 205 8 0 9644  
9848 53818 53614 2e-88 335  
gi|33347862|gb|AF411835.1| scaffold1863 94.21 190 11 0 9455  
9644 53735 53546 5e-75 291  
gi|33347862|gb|AF411835.1| scaffold1863 94.77 153 8 0 918  
1070 257930 258082 2e-59 239  
gi|33347862|gb|AF411835.1| scaffold1863 97.08 137 4 0 9712  
9848 53818 53682 3e-57 231  
gi|33347862|gb|AF411835.1| scaffold1863 88.05 159 15 3 915  
1071 258082 257926 2e-43 185  
gi|33347862|gb|AF411835.1| scaffold1863 88.36 146 16 1 8675  
8820 45558 45414 5e-40 174  
gi|33347862|gb|AF411835.1| scaffold1863 91.80 122 10 0 9455  
9576 53667 53546 7e-39 171  
gi|33347862|gb|AF411835.1| scaffold1863 88.97 136 14 1 8685  
8820 54172 54038 9e-38 167  
gi|33347862|gb|AF411835.1| scaffold1863 97.10 69 2 0 9780  
9848 53818 53750 9e-23 117  
gi|33347862|gb|AF411835.1| scaffold1863 87.93 58 6 1 9451  
9508 53602 53546 9e-08 67.6  
gi|33347862|gb|AF411835.1| scaffold4278 95.74 1220 46 5 7801  
9016 149502 150719 0.0 1960  
gi|33347862|gb|AF411835.1| scaffold4278 96.71 1156 18 7 9451  
10587 151455 152609 0.0 1906  
gi|33347862|gb|AF411835.1| scaffold4278 99.18 485 4 0 8675  
9159 150574 151058 0.0 874  
gi|33347862|gb|AF411835.1| scaffold4278 95.24 399 18 1 9450  
9848 151318 151715 3e-177 630  
gi|33347862|gb|AF411835.1| scaffold4278 94.76 401 17 3 9451  
9848 151248 151647 2e-174 621  
gi|33347862|gb|AF411835.1| scaffold4278 94.92 394 20 0 9455  
9848 151390 151783 2e-173 617  
176  
gi|33347862|gb|AF411835.1| scaffold4278 90.82 403 32 5 9450  
9848 151178 151579 2e-148 534  
gi|33347862|gb|AF411835.1| scaffold4278 95.09 326 16 0 9455  
9780 151526 151851 3e-142 514  
gi|33347862|gb|AF411835.1| scaffold4278 90.33 331 28 4 9522  
9848 151181 151511 3e-117 431  
gi|33347862|gb|AF411835.1| scaffold4278 94.19 258 15 0 9455

9712 151594 151851 4e-106 394  
gi|33347862|gb|AF411835.1| scaffold4278 89.02 264 23 6 9590  
9848 151181 151443 2e-84 322  
gi|33347862|gb|AF411835.1| scaffold4278 94.24 191 9 2 9455  
9644 151662 151851 5e-75 291  
gi|33347862|gb|AF411835.1| scaffold4278 92.86 154 11 0 917  
1070 121205 121358 5e-55 224  
gi|33347862|gb|AF411835.1| scaffold4278 85.64 195 24 4 9658  
9848 151181 151375 2e-48 202  
gi|33347862|gb|AF411835.1| scaffold4278 92.06 126 9 1 9451  
9576 151727 151851 1e-40 176  
gi|33347862|gb|AF411835.1| scaffold4278 88.36 146 16 1 8675  
8820 150771 150915 5e-40 174  
gi|33347862|gb|AF411835.1| scaffold4278 85.90 156 18 2 915  
1068 121358 121205 1e-36 163  
gi|33347862|gb|AF411835.1| scaffold4278 84.73 131 18 2 9724  
9852 151179 151309 1e-26 130  
gi|33347862|gb|AF411835.1| scaffold4278 94.74 57 3 0 9792  
9848 151179 151235 2e-14 89.8  
gi|33347862|gb|AF411835.1| scaffold73529 99.30 995 6 1 1060  
2054 994 1 0.0 1797  
gi|33347862|gb|AF411835.1| scaffold73529 100.00 67 0 0  
850 916 1050 984 5e-25 124  
gi|33347862|gb|AF411835.1| scaffold2392 98.58 918 11 2 1  
916 75241 74324 0.0 1622  
gi|33347862|gb|AF411835.1| scaffold1913 97.82 919 17 3 1  
916 89729 88811 0.0 1583  
gi|33347862|gb|AF411835.1| scaffold1913 93.48 46 2 1 1060  
1104 88821 88776 9e-08 67.6  
gi|33347862|gb|AF411835.1| scaffold74 97.60 917 13 3 1 916  
454593 453685 0.0 1563  
gi|33347862|gb|AF411835.1| scaffold74 95.12 41 2 0 1060 1100  
453695 453655 3e-07 65.8  
gi|33347862|gb|AF411835.1| scaffold13930 93.39 787 37 4 9803  
10574 16270 15484 0.0 1151  
gi|33347862|gb|AF411835.1| scaffold13930 93.53 278 15 2 9162  
9436 15217 14940 4e-111 411  
gi|33347862|gb|AF411835.1| scaffold13930 88.37 172 16 2 9722  
9891 14779 14610 7e-49 204  
gi|33347862|gb|AF411835.1| scaffold13930 88.37 172 16 2 9722  
9891 43873 43704 7e-49 204  
gi|33347862|gb|AF411835.1| scaffold13930 94.17 120 7 0 9035  
9154 15485 15366 9e-43 183  
gi|33347862|gb|AF411835.1| scaffold13930 92.19 128 10 0 9162  
9289 7668 7541 3e-42 182

gi|33347862|gb|AF411835.1| scaffold13930 94.02 117 4 2 9323  
9436 44041 43925 5e-40 174  
gi|33347862|gb|AF411835.1| scaffold13930 92.98 114 5 2 9323  
9433 16427 16314 1e-36 163  
gi|33347862|gb|AF411835.1| scaffold13930 86.36 132 14 4 9518  
9647 14779 14650 5e-30 141  
gi|33347862|gb|AF411835.1| scaffold13930 86.36 132 14 4 9518  
9647 43873 43744 5e-30 141  
gi|33347862|gb|AF411835.1| scaffold13930 86.82 129 11 5 9590  
9715 14775 14650 2e-29 139  
gi|33347862|gb|AF411835.1| scaffold13930 86.82 129 11 5 9590  
9715 43869 43744 2e-29 139  
gi|33347862|gb|AF411835.1| scaffold13930 86.26 131 13 5 9451  
9579 14777 14650 7e-29 137  
gi|33347862|gb|AF411835.1| scaffold13930 86.26 131 13 5 9451  
9579 43871 43744 7e-29 137  
gi|33347862|gb|AF411835.1| scaffold13930 85.61 132 15 2 9654  
9783 14779 14650 3e-28 135  
gi|33347862|gb|AF411835.1| scaffold13930 85.61 132 15 2 9654  
9783 43873 43744 3e-28 135  
gi|33347862|gb|AF411835.1| scaffold13930 94.83 58 3 0 9722  
9779 14877 14820 5e-15 91.6  
gi|33347862|gb|AF411835.1| scaffold13930 94.83 58 3 0 9518  
9575 14877 14820 5e-15 91.6  
gi|33347862|gb|AF411835.1| scaffold13930 96.30 54 2 0 9590  
9643 14873 14820 2e-14 89.8  
gi|33347862|gb|AF411835.1| scaffold13930 88.24 68 7 1 9451  
9518 14875 14809 1e-11 80.5  
gi|33347862|gb|AF411835.1| scaffold13930 91.38 58 5 0 9654  
9711 14877 14820 1e-11 80.5  
gi|33347862|gb|AF411835.1| scaffold3153 97.79 498 7 1 423  
916 33597 34094 0.0 856  
gi|33347862|gb|AF411835.1| scaffold5171 99.12 453 3 1 464  
916 126935 126484 0.0 813  
gi|33347862|gb|AF411835.1| scaffold5171 99.34 305 2 0 1  
305 127238 126934 6e-154 553  
gi|33347862|gb|AF411835.1| scaffold5171 95.12 41 2 0 1060  
1100 126494 126454 3e-07 65.8  
gi|33347862|gb|AF411835.1| scaffold8620 88.16 684 65 10 8  
682 39213 38537 0.0 800  
gi|33347862|gb|AF411835.1| scaffold921 99.03 413 4 0 1  
413 200249 200661 0.0 741  
gi|33347862|gb|AF411835.1| scaffold921 97.14 280 8 0 637  
916 200826 201105 5e-130 473  
gi|33347862|gb|AF411835.1| scaffold187185 97.53 364 9 0 30  
393 364 1 4e-175 623

gi|33347862|gb|AF411835.1| scaffold30874 99.35 310 2 0 4837  
5146 1653 1962 1e-156 562  
gi|33347862|gb|AF411835.1| scaffold6230 87.45 494 51 8 423  
913 42883 43368 1e-155 558  
gi|33347862|gb|AF411835.1| scaffold150541 98.51 268 4 0 9545  
9812 268 1 5e-130 473  
178  
gi|33347862|gb|AF411835.1| scaffold150541 97.37 266 7 0 9477  
9742 268 3 6e-124 453  
gi|33347862|gb|AF411835.1| scaffold150541 95.76 236 10 0 9613  
9848 268 33 3e-102 381  
gi|33347862|gb|AF411835.1| scaffold150541 94.69 226 11 1 9451  
9676 225 1 8e-93 350  
gi|33347862|gb|AF411835.1| scaffold150541 100.00 158 0 0  
8973 9130 826 669 1e-75 292  
gi|33347862|gb|AF411835.1| scaffold150541 96.43 168 6 0 9681  
9848 268 101 4e-71 278  
gi|33347862|gb|AF411835.1| scaffold150541 94.19 155 7 2 9455  
9608 154 1 2e-58 235  
gi|33347862|gb|AF411835.1| scaffold150541 97.00 100 3 0 9749  
9848 268 169 2e-38 169  
gi|33347862|gb|AF411835.1| scaffold150541 91.11 90 7 1 9451  
9540 89 1 7e-24 121  
gi|33347862|gb|AF411835.1| scaffold5170 77.70 749 127 28 1248  
1982 47247 47969 2e-114 422  
gi|33347862|gb|AF411835.1| scaffold5170 83.46 266 35 7 2675  
2938 48722 48980 2e-59 239  
gi|33347862|gb|AF411835.1| scaffold40664 97.56 205 5 0 432  
636 1771 1975 2e-93 351  
gi|33347862|gb|AF411835.1| scaffold579322 98.93 187 2 0 548  
734 187 1 2e-88 335  
gi|33347862|gb|AF411835.1| scaffold624010 100.00 179 0 0  
423 601 3 181 3e-87 331  
gi|33347862|gb|AF411835.1| scaffold612582 98.36 183 1 1 337  
517 183 1 6e-84 320  
gi|33347862|gb|AF411835.1| scaffold619484 97.80 182 1 1 338  
516 1 182 4e-81 311  
gi|33347862|gb|AF411835.1| scaffold462205 95.38 195 9 0 9487  
9681 1 195 4e-81 311  
gi|33347862|gb|AF411835.1| scaffold462205 94.87 195 10 0 9555  
9749 1 195 2e-79 305  
gi|33347862|gb|AF411835.1| scaffold462205 94.36 195 11 0 9623  
9817 1 195 8e-78 300  
gi|33347862|gb|AF411835.1| scaffold462205 94.94 158 8 0 9691  
9848 1 158 3e-62 248  
gi|33347862|gb|AF411835.1| scaffold462205 93.71 159 10 0 9455

9613 37 195 2e-59 239  
gi|33347862|gb|AF411835.1| scaffold462205 94.44 90 5 0 9759  
9848 1 90 2e-29 139  
gi|33347862|gb|AF411835.1| scaffold462205 92.31 91 7 0 9455  
9545 105 195 1e-26 130  
gi|33347862|gb|AF411835.1| scaffold616913 97.27 183 1 1 338  
516 1 183 5e-80 307  
gi|33347862|gb|AF411835.1| scaffold15192 99.38 161 1 0 910  
1070 6758 6598 1e-75 292  
gi|33347862|gb|AF411835.1| scaffold15192 89.29 168 13 3 915  
1079 6598 6763 2e-49 206  
gi|33347862|gb|AF411835.1| scaffold6309 100.00 158 0 0  
915 1072 77339 77182 1e-75 292  
179  
gi|33347862|gb|AF411835.1| scaffold6309 91.14 158 10 2 915  
1070 77184 77339 4e-51 211  
gi|33347862|gb|AF411835.1| scaffold6095 99.37 159 1 0 914  
1072 98396 98554 2e-74 289  
gi|33347862|gb|AF411835.1| scaffold6095 90.51 158 11 2 915  
1070 98552 98397 2e-49 206  
gi|33347862|gb|AF411835.1| scaffold5420 100.00 156 0 0  
915 1070 88568 88413 2e-74 289  
gi|33347862|gb|AF411835.1| scaffold5420 94.90 157 6 1 915  
1071 33440 33286 4e-61 244  
gi|33347862|gb|AF411835.1| scaffold5420 91.19 159 10 2 914  
1070 88412 88568 1e-51 213  
gi|33347862|gb|AF411835.1| scaffold5420 88.54 157 16 2 915  
1071 33287 33441 2e-44 189  
gi|33347862|gb|AF411835.1| scaffold2220 100.00 156 0 0  
915 1070 173394 173549 2e-74 289  
gi|33347862|gb|AF411835.1| scaffold2220 91.19 159 10 2 915  
1071 173549 173393 1e-51 213  
gi|33347862|gb|AF411835.1| scaffold1910 100.00 156 0 0  
915 1070 33754 33599 2e-74 289  
gi|33347862|gb|AF411835.1| scaffold1910 91.14 158 10 2 915  
1070 33599 33754 4e-51 211  
gi|33347862|gb|AF411835.1| scaffold1276 100.00 156 0 0  
915 1070 130855 131010 2e-74 289  
gi|33347862|gb|AF411835.1| scaffold1276 91.19 159 10 2 914  
1070 131011 130855 1e-51 213  
gi|33347862|gb|AF411835.1| scaffold768 98.20 167 0 3 904  
1070 107260 107097 2e-74 289  
gi|33347862|gb|AF411835.1| scaffold768 91.19 159 10 2 914  
1070 107096 107252 1e-51 213  
gi|33347862|gb|AF411835.1| scaffold368 100.00 156 0 0  
915 1070 173589 173434 2e-74 289



gi|33347862|gb|AF411835.1| scaffold368 91.19 159 10 2 914  
1070 173433 173589 1e-51 213  
gi|33347862|gb|AF411835.1| scaffold357 100.00 156 0 0  
915 1070 94489 94644 2e-74 289  
gi|33347862|gb|AF411835.1| scaffold357 91.19 159 10 2 914  
1070 94645 94489 1e-51 213  
gi|33347862|gb|AF411835.1| scaffold6987 99.37 158 1 0 914  
1071 34458 34615 7e-74 287  
gi|33347862|gb|AF411835.1| scaffold6987 90.51 158 11 2 915  
1070 34614 34459 2e-49 206  
gi|33347862|gb|AF411835.1| scaffold17035 99.36 157 1 0 915  
1071 11305 11461 2e-73 285  
gi|33347862|gb|AF411835.1| scaffold17035 90.62 160 11 2 915  
1072 11460 11303 1e-50 209  
gi|33347862|gb|AF411835.1| scaffold1260 99.36 157 1 0 914  
1070 31806 31962 2e-73 285  
gi|33347862|gb|AF411835.1| scaffold1260 90.62 160 11 2 913  
1070 31964 31807 1e-50 209  
gi|33347862|gb|AF411835.1| scaffold993 99.36 157 1 0 914  
1070 17868 18024 2e-73 285  
180  
gi|33347862|gb|AF411835.1| scaffold993 90.51 158 11 2 915  
1070 18024 17869 2e-49 206  
gi|33347862|gb|AF411835.1| scaffold621 99.36 157 1 0 914  
1070 340659 340503 2e-73 285  
gi|33347862|gb|AF411835.1| scaffold621 90.57 159 11 2 914  
1070 340502 340658 5e-50 207  
gi|33347862|gb|AF411835.1| scaffold192 99.36 157 1 0 914  
1070 429181 429025 2e-73 285  
gi|33347862|gb|AF411835.1| scaffold192 90.51 158 11 2 915  
1070 429025 429180 2e-49 206  
gi|33347862|gb|AF411835.1| scaffold20 99.36 157 1 0 914 1070  
740316 740472 2e-73 285  
gi|33347862|gb|AF411835.1| scaffold20 90.12 162 11 3 912 1070  
740476 740317 2e-49 206  
gi|33347862|gb|AF411835.1| scaffold6766 99.36 156 1 0 915  
1070 8305 8460 8e-73 283  
gi|33347862|gb|AF411835.1| scaffold6766 90.57 159 11 2 915  
1071 8460 8304 5e-50 207  
gi|33347862|gb|AF411835.1| scaffold6104 99.36 156 1 0 915  
1070 84016 83861 8e-73 283  
gi|33347862|gb|AF411835.1| scaffold6104 90.51 158 11 2 915  
1070 83861 84016 2e-49 206  
gi|33347862|gb|AF411835.1| scaffold3242 99.36 156 1 0 915  
1070 132602 132757 8e-73 283  
gi|33347862|gb|AF411835.1| scaffold3242 90.62 160 11 2 914

1071 132758 132601 1e-50 209  
gi|33347862|gb|AF411835.1| scaffold2217 99.36 156 1 0 915  
1070 231435 231280 8e-73 283  
gi|33347862|gb|AF411835.1| scaffold2217 91.30 161 10 2 914  
1072 231279 231437 9e-53 217  
gi|33347862|gb|AF411835.1| scaffold1937 99.36 156 1 0 915  
1070 259582 259737 8e-73 283  
gi|33347862|gb|AF411835.1| scaffold1937 90.57 159 11 2 915  
1071 259737 259581 5e-50 207  
gi|33347862|gb|AF411835.1| scaffold16933 98.73 157 2 0 915  
1071 4641 4797 1e-71 279  
gi|33347862|gb|AF411835.1| scaffold16933 92.41 158 8 2 915  
1070 4796 4641 2e-54 222  
gi|33347862|gb|AF411835.1| scaffold4084 98.73 157 2 0 915  
1071 149321 149165 1e-71 279  
gi|33347862|gb|AF411835.1| scaffold4084 89.87 158 12 2 915  
1070 149166 149321 9e-48 200  
gi|33347862|gb|AF411835.1| scaffold17305 98.72 156 2 0 915  
1070 9010 8855 4e-71 278  
gi|33347862|gb|AF411835.1| scaffold17305 89.94 159 12 2 914  
1070 8854 9010 2e-48 202  
gi|33347862|gb|AF411835.1| scaffold7621 96.99 166 3 2 915  
1078 20094 19929 4e-71 278  
gi|33347862|gb|AF411835.1| scaffold7621 90.00 160 12 3 914  
1071 19938 20095 7e-49 204  
gi|33347862|gb|AF411835.1| scaffold1061 98.72 156 2 0 915  
1070 27482 27637 4e-71 278  
181  
gi|33347862|gb|AF411835.1| scaffold1061 89.87 158 12 2 915  
1070 27637 27482 9e-48 200  
gi|33347862|gb|AF411835.1| scaffold1061 100.00 100 0 0  
975 1074 27639 27738 2e-43 185  
gi|33347862|gb|AF411835.1| scaffold1061 91.84 98 6 1 915  
1012 27734 27639 3e-28 135  
gi|33347862|gb|AF411835.1| scaffold901 99.35 153 1 0 918  
1070 72042 71890 4e-71 278  
gi|33347862|gb|AF411835.1| scaffold901 90.38 156 11 2 914  
1067 71889 72042 2e-48 202  
gi|33347862|gb|AF411835.1| scaffold845 98.12 160 2 1 912  
1070 310650 310491 4e-71 278  
gi|33347862|gb|AF411835.1| scaffold845 90.96 166 10 3 915  
1078 310491 310653 2e-53 219  
gi|33347862|gb|AF411835.1| scaffold16700 98.11 159 2 1 914  
1071 7828 7670 1e-70 276  
gi|33347862|gb|AF411835.1| scaffold16700 89.31 159 12 3 915  
1070 7671 7827 4e-46 195

gi|33347862|gb|AF411835.1| scaffold5243 98.10 158 3 0 914  
1071 92469 92312 1e-70 276  
gi|33347862|gb|AF411835.1| scaffold5243 90.51 158 11 2 915  
1070 92313 92468 2e-49 206  
gi|33347862|gb|AF411835.1| scaffold3387 98.09 157 3 0 914  
1070 132854 133010 5e-70 274  
gi|33347862|gb|AF411835.1| scaffold3387 89.87 158 12 3 915  
1070 133010 132855 9e-48 200  
gi|33347862|gb|AF411835.1| scaffold2946 98.09 157 3 0 914  
1070 27572 27728 5e-70 274  
gi|33347862|gb|AF411835.1| scaffold2946 89.94 159 12 3 914  
1070 27729 27573 2e-48 202  
gi|33347862|gb|AF411835.1| scaffold1022\_2 98.09 157 3 0 914  
1070 60791 60947 5e-70 274  
gi|33347862|gb|AF411835.1| scaffold1022\_2 95.60 159 7 0 914  
1072 22418 22576 2e-64 255  
gi|33347862|gb|AF411835.1| scaffold1022\_2 93.90 164 9 1 908  
1070 23479 23642 1e-61 246  
gi|33347862|gb|AF411835.1| scaffold1022\_2 89.24 158 13 2 915  
1070 60947 60792 4e-46 195  
gi|33347862|gb|AF411835.1| scaffold1022\_2 88.61 158 14 3 915  
1070 22574 22419 2e-44 189  
gi|33347862|gb|AF411835.1| scaffold17608 98.08 156 3 0 915  
1070 5374 5529 2e-69 272  
gi|33347862|gb|AF411835.1| scaffold17608 89.38 160 13 2 914  
1071 5530 5373 3e-47 198  
gi|33347862|gb|AF411835.1| scaffold7219 98.08 156 3 0 915  
1070 51728 51573 2e-69 272  
gi|33347862|gb|AF411835.1| scaffold7219 90.00 160 12 3 914  
1071 51572 51729 7e-49 204  
gi|33347862|gb|AF411835.1| scaffold6628 98.08 156 3 0 915  
1070 81908 81753 2e-69 272  
gi|33347862|gb|AF411835.1| scaffold6628 90.00 160 12 3 915  
1072 81753 81910 7e-49 204  
182  
gi|33347862|gb|AF411835.1| scaffold3228 98.08 156 3 0 915  
1070 137458 137613 2e-69 272  
gi|33347862|gb|AF411835.1| scaffold3228 89.22 167 10 5 909  
1070 137621 137458 2e-48 202  
gi|33347862|gb|AF411835.1| scaffold2260 98.08 156 3 0 915  
1070 79530 79685 2e-69 272  
gi|33347862|gb|AF411835.1| scaffold2260 91.14 158 10 3 915  
1070 79685 79530 4e-51 211  
gi|33347862|gb|AF411835.1| scaffold14617 97.47 158 4 0 915  
1072 21625 21468 7e-69 270  
gi|33347862|gb|AF411835.1| scaffold14617 89.24 158 13 3 915

1070 21470 21625 4e-46 195  
gi|33347862|gb|AF411835.1| scaffold3358 97.47 158 4 0 914  
1071 93753 93910 7e-69 270  
gi|33347862|gb|AF411835.1| scaffold3358 89.24 158 13 3 915  
1070 93909 93754 4e-46 195  
gi|33347862|gb|AF411835.1| scaffold3065 97.47 158 4 0 914  
1071 80434 80591 7e-69 270  
gi|33347862|gb|AF411835.1| scaffold3065 89.24 158 13 3 915  
1070 80590 80435 4e-46 195  
gi|33347862|gb|AF411835.1| scaffold922 97.47 158 4 0 914  
1071 51879 52036 7e-69 270  
gi|33347862|gb|AF411835.1| scaffold922 90.51 158 11 3 915  
1070 52035 51880 2e-49 206  
gi|33347862|gb|AF411835.1| scaffold648 100.00 146 0 0  
926 1071 11327 11182 7e-69 270  
gi|33347862|gb|AF411835.1| scaffold648 93.28 134 7 1 915  
1048 11183 11314 1e-46 196  
gi|33347862|gb|AF411835.1| scaffold6633 97.45 157 4 0 915  
1071 63824 63668 2e-68 268  
gi|33347862|gb|AF411835.1| scaffold6633 89.24 158 13 3 915  
1070 63669 63824 4e-46 195  
gi|33347862|gb|AF411835.1| scaffold1662 96.88 160 5 0 915  
1074 254742 254901 2e-68 268  
gi|33347862|gb|AF411835.1| scaffold1662 89.87 158 12 3 915  
1070 254897 254742 9e-48 200  
gi|33347862|gb|AF411835.1| scaffold1534 97.45 157 4 0 915  
1071 261362 261518 2e-68 268  
gi|33347862|gb|AF411835.1| scaffold1534 94.87 156 8 0 915  
1070 21215 21060 4e-61 244  
gi|33347862|gb|AF411835.1| scaffold1534 90.51 158 11 3 915  
1070 261517 261362 2e-49 206  
gi|33347862|gb|AF411835.1| scaffold1534 87.50 160 16 2 914  
1071 21059 21216 3e-42 182  
gi|33347862|gb|AF411835.1| scaffold1239 97.45 157 4 0 914  
1070 125883 126039 2e-68 268  
gi|33347862|gb|AF411835.1| scaffold1239 89.38 160 13 3 913  
1070 126041 125884 3e-47 198  
gi|33347862|gb|AF411835.1| scaffold748 97.45 157 4 0 914  
1070 223925 223769 2e-68 268  
gi|33347862|gb|AF411835.1| scaffold748 95.56 135 6 0 936  
1070 355361 355495 9e-53 217  
183  
gi|33347862|gb|AF411835.1| scaffold748 89.02 164 13 4 910  
1070 223763 223924 3e-47 198  
gi|33347862|gb|AF411835.1| scaffold748 90.37 135 11 1 914  
1048 355496 355364 1e-40 176

gi|33347862|gb|AF411835.1| scaffold354 97.45 157 4 0 914  
1070 194373 194217 2e-68 268  
gi|33347862|gb|AF411835.1| scaffold354 89.24 158 13 3 915  
1070 194217 194372 4e-46 195  
gi|33347862|gb|AF411835.1| scaffold76 97.45 157 4 0 915 1071  
470176 470020 2e-68 268  
gi|33347862|gb|AF411835.1| scaffold76 89.38 160 13 3 915 1072  
470021 470178 3e-47 198  
gi|33347862|gb|AF411835.1| scaffold9 97.45 157 4 0 915 1071  
14763 14919 2e-68 268  
gi|33347862|gb|AF411835.1| scaffold9 89.24 158 13 3 915 1070  
14918 14763 4e-46 195  
gi|33347862|gb|AF411835.1| scaffold21561 97.44 156 4 0 915  
1070 3651 3496 8e-68 267  
gi|33347862|gb|AF411835.1| scaffold21561 89.31 159 13 3 914  
1070 3495 3651 1e-46 196  
gi|33347862|gb|AF411835.1| scaffold16710 97.44 156 4 0 915  
1070 11802 11647 8e-68 267  
gi|33347862|gb|AF411835.1| scaffold16710 89.24 158 13 3 915  
1070 11647 11802 4e-46 195  
gi|33347862|gb|AF411835.1| scaffold16646 97.44 156 4 0 915  
1070 3203 3358 8e-68 267  
gi|33347862|gb|AF411835.1| scaffold16646 89.31 159 13 3 914  
1070 3359 3203 1e-46 196  
gi|33347862|gb|AF411835.1| scaffold14935 97.44 156 4 0 915  
1070 12284 12129 8e-68 267  
gi|33347862|gb|AF411835.1| scaffold14935 89.24 158 13 3 915  
1070 12129 12284 4e-46 195  
gi|33347862|gb|AF411835.1| scaffold12355 97.44 156 4 0 915  
1070 16956 17111 8e-68 267  
gi|33347862|gb|AF411835.1| scaffold12355 89.38 160 13 3 914  
1071 17112 16955 3e-47 198  
gi|33347862|gb|AF411835.1| scaffold12043 97.44 156 4 0 915  
1070 41806 41651 8e-68 267  
gi|33347862|gb|AF411835.1| scaffold12043 89.31 159 13 3 915  
1071 41651 41807 1e-46 196  
gi|33347862|gb|AF411835.1| scaffold9469 97.44 156 4 0 915  
1070 19729 19884 8e-68 267  
gi|33347862|gb|AF411835.1| scaffold9469 89.31 159 13 3 915  
1071 19884 19728 1e-46 196  
gi|33347862|gb|AF411835.1| scaffold7580 97.44 156 4 0 915  
1070 56209 56364 8e-68 267  
gi|33347862|gb|AF411835.1| scaffold7580 91.82 159 9 3 914  
1070 56365 56209 2e-53 219  
gi|33347862|gb|AF411835.1| scaffold7159 97.44 156 4 0 915  
1070 35181 35026 8e-68 267

gi|33347862|gb|AF411835.1| scaffold7159 89.24 158 13 3 915  
1070 35026 35181 4e-46 195  
184  
gi|33347862|gb|AF411835.1| scaffold6428 98.04 153 3 0 915  
1067 87809 87657 8e-68 267  
gi|33347862|gb|AF411835.1| scaffold6428 89.94 159 12 3 914  
1070 87653 87809 2e-48 202  
gi|33347862|gb|AF411835.1| scaffold4164 96.88 160 4 1 912  
1070 142187 142346 8e-68 267  
gi|33347862|gb|AF411835.1| scaffold4164 89.31 159 13 3 915  
1071 142346 142190 1e-46 196  
gi|33347862|gb|AF411835.1| scaffold3624 97.44 156 4 0 915  
1070 147877 147722 8e-68 267  
gi|33347862|gb|AF411835.1| scaffold3624 89.24 158 13 3 915  
1070 147722 147877 4e-46 195  
gi|33347862|gb|AF411835.1| scaffold1741 97.44 156 4 0 915  
1070 23216 23061 8e-68 267  
gi|33347862|gb|AF411835.1| scaffold1741 89.31 159 13 3 915  
1071 23061 23217 1e-46 196  
gi|33347862|gb|AF411835.1| scaffold1500 97.44 156 4 0 915  
1070 182421 182266 8e-68 267  
gi|33347862|gb|AF411835.1| scaffold1500 96.79 156 5 0 915  
1070 46268 46113 4e-66 261  
gi|33347862|gb|AF411835.1| scaffold1500 94.27 157 8 1 915  
1070 16823 16979 2e-59 239  
gi|33347862|gb|AF411835.1| scaffold1500 89.09 165 13 4 909  
1071 182261 182422 9e-48 200  
gi|33347862|gb|AF411835.1| scaffold1500 88.75 160 14 3 914  
1071 46112 46269 1e-45 193  
gi|33347862|gb|AF411835.1| scaffold1500 86.79 159 16 3 915  
1070 16979 16823 2e-39 172  
gi|33347862|gb|AF411835.1| scaffold1068 97.44 156 4 0 915  
1070 151248 151403 8e-68 267  
gi|33347862|gb|AF411835.1| scaffold1068 89.31 159 13 3 915  
1071 151403 151247 1e-46 196  
gi|33347862|gb|AF411835.1| scaffold725\_2 97.44 156 4 0 915  
1070 984 829 8e-68 267  
gi|33347862|gb|AF411835.1| scaffold725\_2 89.38 160 13 3 914  
1071 828 985 3e-47 198  
gi|33347862|gb|AF411835.1| scaffold710544 96.27 161 6 0 9648  
9808 161 1 3e-67 265  
gi|33347862|gb|AF411835.1| scaffold710544 96.27 161 6 0 9512  
9672 161 1 3e-67 265  
gi|33347862|gb|AF411835.1| scaffold710544 95.65 161 7 0 9580  
9740 161 1 1e-65 259  
gi|33347862|gb|AF411835.1| scaffold710544 98.50 133 2 0 9716

9848 161 29 2e-58 235  
gi|33347862|gb|AF411835.1| scaffold710544 94.16 154 8 1 9451  
9604 153 1 9e-58 233  
gi|33347862|gb|AF411835.1| scaffold710544 93.02 86 5 1 9451  
9536 85 1 5e-25 124  
gi|33347862|gb|AF411835.1| scaffold17046 96.84 158 5 0 915  
1072 5007 5164 3e-67 265  
gi|33347862|gb|AF411835.1| scaffold17046 91.14 158 10 3 915  
1070 5162 5007 4e-51 211  
185  
gi|33347862|gb|AF411835.1| scaffold6420 96.27 161 6 0 915  
1075 38810 38970 3e-67 265  
gi|33347862|gb|AF411835.1| scaffold6420 88.68 159 14 3 915  
1071 38965 38809 5e-45 191  
gi|33347862|gb|AF411835.1| scaffold5399 95.76 165 5 2 915  
1077 112420 112256 3e-67 265  
gi|33347862|gb|AF411835.1| scaffold5399 88.61 158 14 3 915  
1070 112265 112420 2e-44 189  
gi|33347862|gb|AF411835.1| scaffold2792 96.84 158 5 0 915  
1072 25366 25209 3e-67 265  
gi|33347862|gb|AF411835.1| scaffold2792 96.20 158 4 1 915  
1070 35446 35603 5e-65 257  
gi|33347862|gb|AF411835.1| scaffold2792 92.50 160 10 1 914  
1071 35604 35445 4e-56 228  
gi|33347862|gb|AF411835.1| scaffold2792 88.68 159 14 3 915  
1071 25211 25367 5e-45 191  
gi|33347862|gb|AF411835.1| scaffold2522 95.73 164 7 0 909  
1072 138807 138970 3e-67 265  
gi|33347862|gb|AF411835.1| scaffold2522 90.51 158 11 3 915  
1070 138968 138813 2e-49 206  
gi|33347862|gb|AF411835.1| scaffold1802 96.84 158 5 0 915  
1072 11798 11641 3e-67 265  
gi|33347862|gb|AF411835.1| scaffold1802 88.61 158 14 3 915  
1070 11643 11798 2e-44 189  
gi|33347862|gb|AF411835.1| scaffold17771 94.71 170 7 2 914  
1082 400 232 1e-66 263  
gi|33347862|gb|AF411835.1| scaffold17771 91.14 158 10 2 915  
1070 244 399 4e-51 211  
gi|33347862|gb|AF411835.1| scaffold11553 96.82 157 5 0 914  
1070 16381 16537 1e-66 263  
gi|33347862|gb|AF411835.1| scaffold11553 88.61 158 14 3 915  
1070 16537 16382 2e-44 189  
gi|33347862|gb|AF411835.1| scaffold9853 96.82 157 5 0 914  
1070 35487 35643 1e-66 263  
gi|33347862|gb|AF411835.1| scaffold9853 89.87 158 12 3 915  
1070 35643 35488 9e-48 200

gi|33347862|gb|AF411835.1| scaffold5616 96.82 157 5 0 914  
1070 96886 96730 1e-66 263  
gi|33347862|gb|AF411835.1| scaffold5616 88.61 158 14 3 915  
1070 96730 96885 2e-44 189  
gi|33347862|gb|AF411835.1| scaffold5041 95.73 164 6 1 908  
1071 122142 121980 1e-66 263  
gi|33347862|gb|AF411835.1| scaffold5041 88.82 161 13 4 915  
1073 121981 122138 1e-45 193  
gi|33347862|gb|AF411835.1| scaffold4018 96.82 157 5 0 914  
1070 114121 114277 1e-66 263  
gi|33347862|gb|AF411835.1| scaffold4018 88.61 158 14 3 915  
1070 114277 114122 2e-44 189  
gi|33347862|gb|AF411835.1| scaffold3068 96.82 157 5 0 914  
1070 72287 72131 1e-66 263  
gi|33347862|gb|AF411835.1| scaffold3068 89.87 158 12 3 915  
1070 72131 72286 9e-48 200  
186  
gi|33347862|gb|AF411835.1| scaffold2785 96.82 157 5 0 915  
1071 190311 190467 1e-66 263  
gi|33347862|gb|AF411835.1| scaffold2785 88.61 158 14 3 915  
1070 190466 190311 2e-44 189  
gi|33347862|gb|AF411835.1| scaffold2464 96.82 157 5 0 915  
1071 31844 31688 1e-66 263  
gi|33347862|gb|AF411835.1| scaffold2464 88.61 158 14 3 915  
1070 31689 31844 2e-44 189  
gi|33347862|gb|AF411835.1| scaffold2257 96.82 157 5 0 914  
1070 16133 15977 1e-66 263  
gi|33347862|gb|AF411835.1| scaffold2257 88.61 158 14 3 915  
1070 15977 16132 2e-44 189  
gi|33347862|gb|AF411835.1| scaffold2008 96.82 157 5 0 914  
1070 28287 28131 1e-66 263  
gi|33347862|gb|AF411835.1| scaffold2008 89.87 158 12 3 915  
1070 28131 28286 9e-48 200  
gi|33347862|gb|AF411835.1| scaffold2008 89.29 84 7 1 993  
1074 34243 34326 7e-19 104  
gi|33347862|gb|AF411835.1| scaffold1275 96.25 160 6 0 912  
1071 39361 39202 1e-66 263  
gi|33347862|gb|AF411835.1| scaffold1275 87.97 158 15 3 915  
1070 39203 39358 9e-43 183  
gi|33347862|gb|AF411835.1| scaffold974 96.82 157 5 0 914  
1070 326733 326577 1e-66 263  
gi|33347862|gb|AF411835.1| scaffold974 88.41 164 14 4 910  
1070 326571 326732 1e-45 193  
gi|33347862|gb|AF411835.1| scaffold264 96.82 157 5 0 915  
1071 469520 469364 1e-66 263  
gi|33347862|gb|AF411835.1| scaffold264 88.27 162 14 4 912



1070 469361 469520 2e-44 189  
gi|33347862|gb|AF411835.1| scaffold13 96.82 157 5 0 915 1071  
692124 692280 1e-66 263  
gi|33347862|gb|AF411835.1| scaffold13 88.61 158 14 3 915 1070  
692279 692124 2e-44 189  
gi|33347862|gb|AF411835.1| scaffold46141 96.25 160 5 1 912  
1071 889 731 4e-66 261  
gi|33347862|gb|AF411835.1| scaffold46141 88.54 157 14 3 915  
1069 732 886 7e-44 187  
gi|33347862|gb|AF411835.1| scaffold18195 96.79 156 5 0 915  
1070 4263 4418 4e-66 261  
gi|33347862|gb|AF411835.1| scaffold18195 88.68 159 14 3 914  
1070 4419 4263 5e-45 191  
gi|33347862|gb|AF411835.1| scaffold12552 96.79 156 5 0 915  
1070 23225 23380 4e-66 261  
gi|33347862|gb|AF411835.1| scaffold12552 88.68 159 14 3 914  
1070 23381 23225 5e-45 191  
gi|33347862|gb|AF411835.1| scaffold12031 96.23 159 6 0 914  
1072 746 588 4e-66 261  
gi|33347862|gb|AF411835.1| scaffold12031 87.97 158 15 3 915  
1070 590 745 9e-43 183  
gi|33347862|gb|AF411835.1| scaffold9937 96.79 156 5 0 915  
1070 49532 49687 4e-66 261  
187  
gi|33347862|gb|AF411835.1| scaffold9937 88.68 159 14 3 914  
1070 49688 49532 5e-45 191  
gi|33347862|gb|AF411835.1| scaffold9786 97.39 153 4 0 916  
1068 22301 22149 4e-66 261  
gi|33347862|gb|AF411835.1| scaffold9786 89.03 155 13 3 917  
1069 22149 22301 2e-44 189  
gi|33347862|gb|AF411835.1| scaffold6666 96.79 156 5 0 915  
1070 52810 52965 4e-66 261  
gi|33347862|gb|AF411835.1| scaffold6666 90.00 160 12 3 914  
1071 52966 52809 7e-49 204  
gi|33347862|gb|AF411835.1| scaffold5922 96.25 160 5 1 912  
1070 7777 7618 4e-66 261  
gi|33347862|gb|AF411835.1| scaffold5922 88.68 159 14 3 914  
1070 7617 7773 5e-45 191  
gi|33347862|gb|AF411835.1| scaffold5731 96.79 156 5 0 915  
1070 97051 96896 4e-66 261  
gi|33347862|gb|AF411835.1| scaffold5731 89.87 158 12 3 915  
1070 96896 97051 9e-48 200  
gi|33347862|gb|AF411835.1| scaffold4439 96.79 156 5 0 915  
1070 73037 72882 4e-66 261  
gi|33347862|gb|AF411835.1| scaffold4439 88.68 159 14 3 915  
1071 72882 73038 5e-45 191

gi|33347862|gb|AF411835.1| scaffold4121 96.79 156 5 0 915  
1070 25959 25804 4e-66 261  
gi|33347862|gb|AF411835.1| scaffold4121 91.14 158 10 3 915  
1070 25804 25959 4e-51 211  
gi|33347862|gb|AF411835.1| scaffold4011 96.79 156 5 0 915  
1070 69688 69843 4e-66 261  
gi|33347862|gb|AF411835.1| scaffold4011 88.61 158 14 3 915  
1070 69843 69688 2e-44 189  
gi|33347862|gb|AF411835.1| scaffold3656 96.79 156 5 0 915  
1070 82299 82144 4e-66 261  
gi|33347862|gb|AF411835.1| scaffold3656 91.25 160 10 3 914  
1071 82143 82300 3e-52 215  
gi|33347862|gb|AF411835.1| scaffold3286 96.79 156 5 0 915  
1070 173811 173656 4e-66 261  
gi|33347862|gb|AF411835.1| scaffold3286 94.90 157 8 0 914  
1070 124090 124246 1e-61 246  
gi|33347862|gb|AF411835.1| scaffold3286 89.94 159 12 2 914  
1070 124247 124091 2e-48 202  
gi|33347862|gb|AF411835.1| scaffold3286 88.68 159 14 3 914  
1070 173655 173811 5e-45 191  
gi|33347862|gb|AF411835.1| scaffold3127 96.23 159 6 0 914  
1072 117904 117746 4e-66 261  
gi|33347862|gb|AF411835.1| scaffold3127 89.24 158 13 3 915  
1070 117748 117903 4e-46 195  
gi|33347862|gb|AF411835.1| scaffold2011\_1 96.79 156 5 0 915  
1070 118968 119123 4e-66 261  
gi|33347862|gb|AF411835.1| scaffold2011\_1 88.89 162 13 4 911  
1070 119126 118968 4e-46 195  
gi|33347862|gb|AF411835.1| scaffold1808 96.79 156 5 0 915  
1070 1244 1089 4e-66 261  
188  
gi|33347862|gb|AF411835.1| scaffold1808 89.94 159 12 3 914  
1070 1088 1244 2e-48 202  
gi|33347862|gb|AF411835.1| scaffold1808 96.47 85 2 1 912  
995 117592 117508 2e-29 139  
gi|33347862|gb|AF411835.1| scaffold1808 90.62 96 5 3 993  
1085 117509 117603 5e-25 124  
gi|33347862|gb|AF411835.1| scaffold1041 96.79 156 5 0 915  
1070 219136 219291 4e-66 261  
gi|33347862|gb|AF411835.1| scaffold1041 94.23 156 8 1 915  
1070 279593 279747 7e-59 237  
gi|33347862|gb|AF411835.1| scaffold1041 88.61 158 14 3 915  
1070 219291 219136 2e-44 189  
gi|33347862|gb|AF411835.1| scaffold1041 87.50 160 15 4 914  
1071 279748 279592 1e-41 180  
gi|33347862|gb|AF411835.1| scaffold836 96.79 156 5 0 915

1070 202226 202381 4e-66 261  
gi|33347862|gb|AF411835.1| scaffold836 91.25 160 10 3 914  
1071 202382 202225 3e-52 215  
gi|33347862|gb|AF411835.1| scaffold744 96.79 156 5 0 915  
1070 247929 248084 4e-66 261  
gi|33347862|gb|AF411835.1| scaffold744 88.68 159 14 3 915  
1071 248084 247928 5e-45 191  
gi|33347862|gb|AF411835.1| scaffold364 97.39 153 4 0 916  
1068 457675 457827 4e-66 261  
gi|33347862|gb|AF411835.1| scaffold364 88.68 159 14 3 917  
1073 457827 457671 5e-45 191  
gi|33347862|gb|AF411835.1| scaffold147 96.79 156 5 0 915  
1070 302501 302346 4e-66 261  
gi|33347862|gb|AF411835.1| scaffold147 88.41 164 14 4 911  
1072 302343 302503 1e-45 193  
gi|33347862|gb|AF411835.1| scaffold105 96.79 156 5 0 915  
1070 523857 523702 4e-66 261  
gi|33347862|gb|AF411835.1| scaffold105 91.82 159 9 3 914  
1070 523701 523857 2e-53 219  
gi|33347862|gb|AF411835.1| scaffold79 96.79 156 5 0 915 1070  
114555 114710 4e-66 261  
gi|33347862|gb|AF411835.1| scaffold79 89.87 158 12 3 915 1070  
114710 114555 9e-48 200  
gi|33347862|gb|AF411835.1| scaffold89 96.79 156 5 0 915 1070  
249661 249816 4e-66 261  
gi|33347862|gb|AF411835.1| scaffold89 89.87 158 12 3 915 1070  
249816 249661 9e-48 200  
gi|33347862|gb|AF411835.1| scaffold15682 96.20 158 6 0 913  
1070 10747 10904 1e-65 259  
gi|33347862|gb|AF411835.1| scaffold15682 89.24 158 13 3 915  
1070 10904 10749 4e-46 195  
gi|33347862|gb|AF411835.1| scaffold10002 96.20 158 6 0 914  
1071 35154 34997 1e-65 259  
gi|33347862|gb|AF411835.1| scaffold10002 89.24 158 13 3 915  
1070 34998 35153 4e-46 195  
gi|33347862|gb|AF411835.1| scaffold9434 96.20 158 6 0 913  
1070 42820 42977 1e-65 259  
189  
gi|33347862|gb|AF411835.1| scaffold9434 91.14 158 10 2 915  
1070 42977 42822 4e-51 211  
gi|33347862|gb|AF411835.1| scaffold8209 96.20 158 6 0 914  
1071 82739 82896 1e-65 259  
gi|33347862|gb|AF411835.1| scaffold8209 87.97 158 15 3 915  
1070 82895 82740 9e-43 183  
gi|33347862|gb|AF411835.1| scaffold4266 96.20 158 6 0 915  
1072 123554 123711 1e-65 259

gi|33347862|gb|AF411835.1| scaffold4266 89.31 159 13 3 915  
1071 123709 123553 1e-46 196  
gi|33347862|gb|AF411835.1| scaffold4006 95.68 162 6 1 915  
1076 152655 152815 1e-65 259  
gi|33347862|gb|AF411835.1| scaffold4006 88.89 162 14 3 911  
1070 152814 152655 1e-46 196  
gi|33347862|gb|AF411835.1| scaffold1958 96.20 158 6 0 914  
1071 114837 114680 1e-65 259  
gi|33347862|gb|AF411835.1| scaffold1958 94.94 158 8 0 914  
1071 170713 170870 3e-62 248  
gi|33347862|gb|AF411835.1| scaffold1958 89.24 158 13 3 915  
1070 114681 114836 4e-46 195  
gi|33347862|gb|AF411835.1| scaffold1958 88.61 158 14 3 915  
1070 170869 170714 2e-44 189  
gi|33347862|gb|AF411835.1| scaffold1695 95.65 161 7 0 915  
1075 232146 232306 1e-65 259  
gi|33347862|gb|AF411835.1| scaffold1695 87.80 164 15 4 911  
1071 232306 232145 7e-44 187  
gi|33347862|gb|AF411835.1| scaffold1494 96.20 158 6 0 915  
1072 251794 251637 1e-65 259  
gi|33347862|gb|AF411835.1| scaffold1494 92.41 158 8 3 915  
1070 251639 251794 2e-54 222  
gi|33347862|gb|AF411835.1| scaffold632 96.20 158 6 0 914  
1071 7479 7636 1e-65 259  
gi|33347862|gb|AF411835.1| scaffold632 90.51 158 11 3 915  
1070 7635 7480 2e-49 206  
gi|33347862|gb|AF411835.1| scaffold329 96.20 158 6 0 915  
1072 455304 455147 1e-65 259  
gi|33347862|gb|AF411835.1| scaffold329 89.94 169 12 4 908  
1074 455143 455308 1e-51 213  
gi|33347862|gb|AF411835.1| scaffold23299 96.18 157 6 0 915  
1071 4111 3955 5e-65 257  
gi|33347862|gb|AF411835.1| scaffold23299 89.24 158 13 3 915  
1070 3956 4111 4e-46 195  
gi|33347862|gb|AF411835.1| scaffold10786 95.62 160 7 0 913  
1072 44187 44346 5e-65 257  
gi|33347862|gb|AF411835.1| scaffold10786 90.51 158 11 2 915  
1070 44344 44189 2e-49 206  
gi|33347862|gb|AF411835.1| scaffold9569 96.18 157 6 0 915  
1071 67157 67001 5e-65 257  
gi|33347862|gb|AF411835.1| scaffold9569 89.24 158 13 3 915  
1070 67002 67157 4e-46 195  
gi|33347862|gb|AF411835.1| scaffold5668 94.12 170 9 1 902  
1070 58221 58390 5e-65 257  
190  
gi|33347862|gb|AF411835.1| scaffold5668 89.24 158 13 3 915

1070 58390 58235 4e-46 195  
gi|33347862|gb|AF411835.1| scaffold5668 94.12 119 5 2 904  
1021 31733 31850 1e-41 180  
gi|33347862|gb|AF411835.1| scaffold5668 92.52 107 6 1 966  
1070 31850 31744 2e-33 152  
gi|33347862|gb|AF411835.1| scaffold5518 96.18 157 6 0 914  
1070 117908 118064 5e-65 257  
gi|33347862|gb|AF411835.1| scaffold5518 88.48 165 14 4 908  
1070 118070 117909 4e-46 195  
gi|33347862|gb|AF411835.1| scaffold4051 96.18 157 6 0 915  
1071 63069 62913 5e-65 257  
gi|33347862|gb|AF411835.1| scaffold4051 87.97 158 15 3 915  
1070 62914 63069 9e-43 183  
gi|33347862|gb|AF411835.1| scaffold3930 96.18 157 6 0 914  
1070 125247 125403 5e-65 257  
gi|33347862|gb|AF411835.1| scaffold3930 87.97 158 15 3 915  
1070 125403 125248 9e-43 183  
gi|33347862|gb|AF411835.1| scaffold3627 96.18 157 6 0 915  
1071 153077 153233 5e-65 257  
gi|33347862|gb|AF411835.1| scaffold3627 88.61 158 14 2 915  
1070 153232 153077 2e-44 189  
gi|33347862|gb|AF411835.1| scaffold3506 96.18 157 6 0 914  
1070 62029 62185 5e-65 257  
gi|33347862|gb|AF411835.1| scaffold3243 95.12 164 7 1 907  
1070 163346 163508 5e-65 257  
gi|33347862|gb|AF411835.1| scaffold3243 89.24 158 13 3 915  
1070 163508 163353 4e-46 195  
gi|33347862|gb|AF411835.1| scaffold2795 96.18 157 6 0 915  
1071 41370 41526 5e-65 257  
gi|33347862|gb|AF411835.1| scaffold2795 94.30 158 9 0 913  
1070 41759 41916 1e-60 243  
gi|33347862|gb|AF411835.1| scaffold2795 89.24 158 13 3 915  
1070 41525 41370 4e-46 195  
gi|33347862|gb|AF411835.1| scaffold2795 88.12 160 15 3 913  
1070 41918 41761 7e-44 187  
gi|33347862|gb|AF411835.1| scaffold2174 98.62 145 2 0 926  
1070 195803 195947 5e-65 257  
gi|33347862|gb|AF411835.1| scaffold2174 92.65 136 8 2 913  
1048 195949 195816 4e-46 195  
gi|33347862|gb|AF411835.1| scaffold1569 96.18 157 6 0 914  
1070 149725 149569 5e-65 257  
gi|33347862|gb|AF411835.1| scaffold1569 90.51 158 11 3 915  
1070 149569 149724 2e-49 206  
gi|33347862|gb|AF411835.1| scaffold685 96.18 157 6 0 914  
1070 337121 337277 5e-65 257  
gi|33347862|gb|AF411835.1| scaffold496 96.18 157 6 0 915

1071 32135 31979 5e-65 257  
gi|33347862|gb|AF411835.1| scaffold496 89.24 158 13 3 915  
1070 31980 32135 4e-46 195  
gi|33347862|gb|AF411835.1| scaffold779587 97.33 150 4 0 9623  
9772 150 1 2e-64 255  
191  
gi|33347862|gb|AF411835.1| scaffold779587 97.33 150 4 0 9487  
9636 150 1 2e-64 255  
gi|33347862|gb|AF411835.1| scaffold779587 96.67 150 5 0 9555  
9704 150 1 9e-63 250  
gi|33347862|gb|AF411835.1| scaffold779587 95.95 148 6 0 9691  
9838 150 3 5e-60 241  
gi|33347862|gb|AF411835.1| scaffold779587 95.61 114 5 0 9455  
9568 114 1 9e-43 183  
gi|33347862|gb|AF411835.1| scaffold779587 96.67 90 3 0 9759  
9848 150 61 9e-33 150  
gi|33347862|gb|AF411835.1| scaffold26800 96.15 156 6 0 915  
1070 1547 1392 2e-64 255  
gi|33347862|gb|AF411835.1| scaffold26800 89.31 159 13 3 914  
1070 1391 1547 1e-46 196  
gi|33347862|gb|AF411835.1| scaffold11949 96.15 156 6 0 915  
1070 37291 37446 2e-64 255  
gi|33347862|gb|AF411835.1| scaffold11949 96.88 96 3 0 976  
1071 37447 37542 4e-36 161  
gi|33347862|gb|AF411835.1| scaffold11949 96.55 58 2 0 915  
972 37193 37250 1e-16 97.1  
gi|33347862|gb|AF411835.1| scaffold8984 96.15 156 6 0 915  
1070 24157 24002 2e-64 255  
gi|33347862|gb|AF411835.1| scaffold8984 89.31 159 13 3 914  
1070 24001 24157 1e-46 196  
gi|33347862|gb|AF411835.1| scaffold8497 96.73 153 5 0 917  
1069 71626 71474 2e-64 255  
gi|33347862|gb|AF411835.1| scaffold8497 89.38 160 12 4 912  
1068 71469 71626 1e-46 196  
gi|33347862|gb|AF411835.1| scaffold8434 96.15 156 6 0 915  
1070 44420 44575 2e-64 255  
gi|33347862|gb|AF411835.1| scaffold8434 88.12 160 15 3 914  
1071 44576 44419 7e-44 187  
gi|33347862|gb|AF411835.1| scaffold7801 96.15 156 6 0 915  
1070 72691 72536 2e-64 255  
gi|33347862|gb|AF411835.1| scaffold7801 89.31 159 13 3 914  
1070 72535 72691 1e-46 196  
gi|33347862|gb|AF411835.1| scaffold7239 96.15 156 6 0 915  
1070 40874 41029 2e-64 255  
gi|33347862|gb|AF411835.1| scaffold7239 91.25 160 10 3 915  
1072 41029 40872 3e-52 215

gi|33347862|gb|AF411835.1| scaffold6396 96.15 156 6 0 915  
1070 26290 26445 2e-64 255  
gi|33347862|gb|AF411835.1| scaffold6396 89.38 160 13 3 914  
1071 26446 26289 3e-47 198  
gi|33347862|gb|AF411835.1| scaffold5845 96.73 153 5 0 918  
1070 89015 89167 2e-64 255  
gi|33347862|gb|AF411835.1| scaffold5845 89.38 160 12 4 910  
1067 89171 89015 1e-46 196  
gi|33347862|gb|AF411835.1| scaffold5200 95.62 160 6 1 915  
1073 120606 120765 2e-64 255  
gi|33347862|gb|AF411835.1| scaffold5200 88.68 159 14 3 915  
1071 120761 120605 5e-45 191  
192  
gi|33347862|gb|AF411835.1| scaffold4448 96.15 156 6 0 915  
1070 81671 81516 2e-64 255  
gi|33347862|gb|AF411835.1| scaffold4448 91.14 158 10 2 915  
1070 81516 81671 4e-51 211  
gi|33347862|gb|AF411835.1| scaffold4415 96.15 156 6 0 915  
1070 46396 46241 2e-64 255  
gi|33347862|gb|AF411835.1| scaffold4415 87.97 158 15 3 915  
1070 46241 46396 9e-43 183  
gi|33347862|gb|AF411835.1| scaffold4230 96.15 156 6 0 915  
1070 78684 78839 2e-64 255  
gi|33347862|gb|AF411835.1| scaffold4230 90.62 160 11 3 914  
1071 78840 78683 1e-50 209  
gi|33347862|gb|AF411835.1| scaffold4009 96.15 156 6 0 915  
1070 100386 100231 2e-64 255  
gi|33347862|gb|AF411835.1| scaffold4009 91.14 158 10 2 915  
1070 100231 100386 4e-51 211  
gi|33347862|gb|AF411835.1| scaffold3934 95.60 159 7 0 915  
1073 49743 49585 2e-64 255  
gi|33347862|gb|AF411835.1| scaffold3934 88.68 159 14 3 915  
1071 49588 49744 5e-45 191  
gi|33347862|gb|AF411835.1| scaffold3691 96.15 156 6 0 915  
1070 120138 119983 2e-64 255  
gi|33347862|gb|AF411835.1| scaffold3525 96.15 156 6 0 915  
1070 156736 156581 2e-64 255  
gi|33347862|gb|AF411835.1| scaffold3525 88.05 159 15 3 915  
1071 156581 156737 2e-43 185  
gi|33347862|gb|AF411835.1| scaffold3385 96.15 156 6 0 915  
1070 41593 41438 2e-64 255  
gi|33347862|gb|AF411835.1| scaffold3385 90.62 160 11 3 914  
1071 41437 41594 1e-50 209  
gi|33347862|gb|AF411835.1| scaffold3306 96.73 153 5 0 917  
1069 7412 7260 2e-64 255  
gi|33347862|gb|AF411835.1| scaffold3306 89.38 160 12 4 912

1068 7255 7412 1e-46 196  
gi|33347862|gb|AF411835.1| scaffold2303 96.18 157 5 1 915  
1070 85035 84879 2e-64 255  
gi|33347862|gb|AF411835.1| scaffold2303 88.12 160 14 4 914  
1070 84878 85035 2e-43 185  
gi|33347862|gb|AF411835.1| scaffold2244 96.15 156 6 0 915  
1070 403 558 2e-64 255  
gi|33347862|gb|AF411835.1| scaffold2244 89.31 159 13 3 914  
1070 559 403 1e-46 196  
gi|33347862|gb|AF411835.1| scaffold1632 96.15 156 6 0 915  
1070 237713 237558 2e-64 255  
gi|33347862|gb|AF411835.1| scaffold1632 90.57 159 11 3 915  
1071 237558 237714 5e-50 207  
gi|33347862|gb|AF411835.1| scaffold1541 95.60 159 7 0 912  
1070 45622 45780 2e-64 255  
gi|33347862|gb|AF411835.1| scaffold1541 87.34 158 16 3 915  
1070 45780 45625 4e-41 178  
gi|33347862|gb|AF411835.1| scaffold1382 96.15 156 6 0 915  
1070 179957 180112 2e-64 255  
193  
gi|33347862|gb|AF411835.1| scaffold1382 89.38 160 13 3 914  
1071 180113 179956 3e-47 198  
gi|33347862|gb|AF411835.1| scaffold1201 96.15 156 6 0 915  
1070 67912 67757 2e-64 255  
gi|33347862|gb|AF411835.1| scaffold1201 89.31 159 13 3 915  
1071 67757 67913 1e-46 196  
gi|33347862|gb|AF411835.1| scaffold952 95.62 160 5 2 913  
1071 337375 337217 2e-64 255  
gi|33347862|gb|AF411835.1| scaffold952 88.68 159 12 4 915  
1070 337218 337373 2e-44 189  
gi|33347862|gb|AF411835.1| scaffold775\_0 96.15 156 6 0 915  
1070 52497 52652 2e-64 255  
gi|33347862|gb|AF411835.1| scaffold775\_0 91.14 158 10 2 915  
1070 52652 52497 4e-51 211  
gi|33347862|gb|AF411835.1| scaffold734 96.15 156 6 0 915  
1070 277401 277556 2e-64 255  
gi|33347862|gb|AF411835.1| scaffold734 89.38 160 13 3 915  
1072 277556 277399 3e-47 198  
gi|33347862|gb|AF411835.1| scaffold690 96.15 156 6 0 915  
1070 132459 132614 2e-64 255  
gi|33347862|gb|AF411835.1| scaffold690 88.20 161 15 3 915  
1073 132614 132456 2e-44 189  
gi|33347862|gb|AF411835.1| scaffold380 96.15 156 6 0 915  
1070 263986 263831 2e-64 255  
gi|33347862|gb|AF411835.1| scaffold380 88.61 158 14 3 915  
1070 263831 263986 2e-44 189



gi|33347862|gb|AF411835.1| scaffold100 96.15 156 6 0 915  
1070 571586 571741 2e-64 255  
gi|33347862|gb|AF411835.1| scaffold100 88.27 162 15 3 911  
1070 571745 571586 5e-45 191  
gi|33347862|gb|AF411835.1| scaffold94 96.15 156 6 0 915 1070  
278555 278400 2e-64 255  
gi|33347862|gb|AF411835.1| scaffold94 94.34 159 9 0 913 1071  
412525 412367 4e-61 244  
gi|33347862|gb|AF411835.1| scaffold94 89.31 159 13 3 914 1070  
278399 278555 1e-46 196  
gi|33347862|gb|AF411835.1| scaffold94 86.08 158 18 3 915 1070  
412368 412523 9e-38 167  
gi|33347862|gb|AF411835.1| scaffold16609 94.55 165 7 2 912  
1074 9584 9748 7e-64 254  
gi|33347862|gb|AF411835.1| scaffold16609 88.68 159 14 3 915  
1071 9743 9587 5e-45 191  
gi|33347862|gb|AF411835.1| scaffold7122 95.57 158 7 0 914  
1071 14377 14220 7e-64 254  
gi|33347862|gb|AF411835.1| scaffold7122 91.54 130 9 1 943  
1070 14247 14376 4e-41 178  
gi|33347862|gb|AF411835.1| scaffold5184 95.57 158 7 0 915  
1072 72067 72224 7e-64 254  
gi|33347862|gb|AF411835.1| scaffold5184 88.61 158 14 3 915  
1070 72222 72067 2e-44 189  
gi|33347862|gb|AF411835.1| scaffold3546 95.57 158 7 0 914  
1071 136510 136667 7e-64 254  
194  
gi|33347862|gb|AF411835.1| scaffold3546 90.51 158 11 2 915  
1070 136666 136511 2e-49 206  
gi|33347862|gb|AF411835.1| scaffold2508 95.57 158 7 0 913  
1070 196239 196082 7e-64 254  
gi|33347862|gb|AF411835.1| scaffold2508 89.87 158 12 4 915  
1070 196082 196237 9e-48 200  
gi|33347862|gb|AF411835.1| scaffold2340 94.55 165 8 1 915  
1078 112916 112752 7e-64 254  
gi|33347862|gb|AF411835.1| scaffold2340 90.57 159 11 2 915  
1071 112761 112917 5e-50 207  
gi|33347862|gb|AF411835.1| scaffold1543 95.57 158 7 0 914  
1071 439628 439471 7e-64 254  
gi|33347862|gb|AF411835.1| scaffold1543 89.87 158 12 3 915  
1070 439472 439627 9e-48 200  
gi|33347862|gb|AF411835.1| scaffold1232 95.57 158 7 0 914  
1071 146980 146823 7e-64 254  
gi|33347862|gb|AF411835.1| scaffold1232 87.97 158 15 3 915  
1070 146824 146979 9e-43 183  
gi|33347862|gb|AF411835.1| scaffold437 95.60 159 6 1 913

1070 789679 789521 7e-64 254  
gi|33347862|gb|AF411835.1| scaffold437 87.82 156 15 3 915  
1068 789521 789674 1e-41 180  
gi|33347862|gb|AF411835.1| scaffold91 95.57 158 7 0 915 1072  
79387 79544 7e-64 254  
gi|33347862|gb|AF411835.1| scaffold91 96.99 133 4 0 914 1046  
368105 367973 5e-55 224  
gi|33347862|gb|AF411835.1| scaffold91 90.77 130 10 1 943 1070  
367975 368104 2e-39 172  
gi|33347862|gb|AF411835.1| scaffold80643 94.48 163 9 0 915  
1077 697 535 2e-63 252  
gi|33347862|gb|AF411835.1| scaffold80643 89.02 164 13 4 911  
1071 537 698 3e-47 198  
gi|33347862|gb|AF411835.1| scaffold67998 95.54 157 7 0 914  
1070 966 810 2e-63 252  
gi|33347862|gb|AF411835.1| scaffold14949 97.30 148 4 0 915  
1062 11599 11746 2e-63 252  
gi|33347862|gb|AF411835.1| scaffold14949 87.90 157 14 4 923  
1077 11746 11593 1e-41 180  
gi|33347862|gb|AF411835.1| scaffold14092 95.54 157 7 0 915  
1071 5102 4946 2e-63 252  
gi|33347862|gb|AF411835.1| scaffold14092 88.68 159 14 3 915  
1071 4947 5103 5e-45 191  
gi|33347862|gb|AF411835.1| scaffold13481 95.54 157 7 0 914  
1070 6415 6571 2e-63 252  
gi|33347862|gb|AF411835.1| scaffold13481 88.61 158 14 3 915  
1070 6571 6416 2e-44 189  
gi|33347862|gb|AF411835.1| scaffold12733 95.00 160 8 0 915  
1074 5646 5487 2e-63 252  
gi|33347862|gb|AF411835.1| scaffold12733 88.17 169 16 3 908  
1074 5484 5650 3e-47 198  
gi|33347862|gb|AF411835.1| scaffold7492 95.54 157 7 0 915  
1071 9736 9580 2e-63 252  
195  
gi|33347862|gb|AF411835.1| scaffold7492 88.96 163 13 4 915  
1074 9581 9741 1e-46 196  
gi|33347862|gb|AF411835.1| scaffold3601 95.54 157 7 0 914  
1070 31472 31628 2e-63 252  
gi|33347862|gb|AF411835.1| scaffold3601 88.27 162 14 4 912  
1070 31632 31473 2e-44 189  
gi|33347862|gb|AF411835.1| scaffold3360 95.57 158 6 1 913  
1070 9572 9728 2e-63 252  
gi|33347862|gb|AF411835.1| scaffold2823 95.03 161 7 1 915  
1075 174371 174530 2e-63 252  
gi|33347862|gb|AF411835.1| scaffold2413 97.93 145 3 0 927  
1071 87492 87636 2e-63 252

gi|33347862|gb|AF411835.1| scaffold2413 91.79 134 9 2 915  
1048 87635 87504 2e-43 185  
gi|33347862|gb|AF411835.1| scaffold1932 95.54 157 7 0 914  
1070 75289 75445 2e-63 252  
gi|33347862|gb|AF411835.1| scaffold1279 95.54 157 7 0 915  
1071 308100 307944 2e-63 252  
gi|33347862|gb|AF411835.1| scaffold1279 88.68 159 14 3 915  
1071 307945 308101 5e-45 191  
gi|33347862|gb|AF411835.1| scaffold962 95.54 157 7 0 914  
1070 84144 83988 2e-63 252  
gi|33347862|gb|AF411835.1| scaffold962 88.61 158 14 3 915  
1070 83988 84143 2e-44 189  
gi|33347862|gb|AF411835.1| scaffold769 95.54 157 7 0 915  
1071 279316 279160 2e-63 252  
gi|33347862|gb|AF411835.1| scaffold769 89.24 158 13 3 915  
1070 279161 279316 4e-46 195  
gi|33347862|gb|AF411835.1| scaffold528 95.54 157 7 0 915  
1071 208266 208110 2e-63 252  
gi|33347862|gb|AF411835.1| scaffold528 87.34 158 16 3 915  
1070 208111 208266 4e-41 178  
gi|33347862|gb|AF411835.1| scaffold342 95.54 157 7 0 914  
1070 23067 23223 2e-63 252  
gi|33347862|gb|AF411835.1| scaffold342 89.03 155 13 3 915  
1067 23223 23071 2e-44 189  
gi|33347862|gb|AF411835.1| scaffold30133 95.51 156 7 0 915  
1070 2611 2456 9e-63 250  
gi|33347862|gb|AF411835.1| scaffold30133 87.04 162 16 4 911  
1070 2453 2611 4e-41 178  
gi|33347862|gb|AF411835.1| scaffold17052 95.51 156 7 0 915  
1070 10091 10246 9e-63 250  
gi|33347862|gb|AF411835.1| scaffold17052 88.68 159 14 3 915  
1071 10246 10090 5e-45 191  
gi|33347862|gb|AF411835.1| scaffold16159 95.51 156 7 0 915  
1070 2838 2993 9e-63 250  
gi|33347862|gb|AF411835.1| scaffold13243 95.51 156 7 0 915  
1070 7892 7737 9e-63 250  
gi|33347862|gb|AF411835.1| scaffold13243 90.57 159 11 2 915  
1071 7737 7893 5e-50 207  
gi|33347862|gb|AF411835.1| scaffold12034 95.51 156 7 0 915  
1070 37752 37597 9e-63 250  
196  
gi|33347862|gb|AF411835.1| scaffold12034 87.04 162 16 4 911  
1070 37594 37752 4e-41 178  
gi|33347862|gb|AF411835.1| scaffold8769 95.51 156 7 0 915  
1070 63177 63332 9e-63 250  
gi|33347862|gb|AF411835.1| scaffold8769 87.58 161 16 3 913

1071 63334 63176 9e-43 183  
gi|33347862|gb|AF411835.1| scaffold7016 95.51 156 7 0 915  
1070 10745 10590 9e-63 250  
gi|33347862|gb|AF411835.1| scaffold7016 87.80 164 16 3 915  
1076 10590 10751 2e-44 189  
gi|33347862|gb|AF411835.1| scaffold6600 93.94 165 10 0 915  
1079 86938 87102 9e-63 250  
gi|33347862|gb|AF411835.1| scaffold6600 89.94 159 12 2 915  
1071 87093 86937 2e-48 202  
gi|33347862|gb|AF411835.1| scaffold4975 94.44 162 9 0 914  
1075 78233 78072 9e-63 250  
gi|33347862|gb|AF411835.1| scaffold4975 89.57 163 12 3 911  
1070 78072 78232 2e-48 202  
gi|33347862|gb|AF411835.1| scaffold4946 95.51 156 7 0 915  
1070 133851 133696 9e-63 250  
gi|33347862|gb|AF411835.1| scaffold4946 88.68 159 14 3 914  
1070 133695 133851 5e-45 191  
gi|33347862|gb|AF411835.1| scaffold4750 95.51 156 7 0 915  
1070 141562 141407 9e-63 250  
gi|33347862|gb|AF411835.1| scaffold4750 88.68 159 14 3 915  
1071 141407 141563 5e-45 191  
gi|33347862|gb|AF411835.1| scaffold4236 95.51 156 7 0 915  
1070 126879 127034 9e-63 250  
gi|33347862|gb|AF411835.1| scaffold4236 89.24 158 13 3 915  
1070 127034 126879 4e-46 195  
gi|33347862|gb|AF411835.1| scaffold4147 96.08 153 6 0 916  
1068 128601 128449 9e-63 250  
gi|33347862|gb|AF411835.1| scaffold4147 89.03 155 13 3 917  
1069 128449 128601 2e-44 189  
gi|33347862|gb|AF411835.1| scaffold4105 95.51 156 7 0 915  
1070 43277 43432 9e-63 250  
gi|33347862|gb|AF411835.1| scaffold3964 95.54 157 6 1 915  
1070 132047 131891 9e-63 250  
gi|33347862|gb|AF411835.1| scaffold3964 89.31 159 12 4 915  
1070 131891 132047 4e-46 195  
gi|33347862|gb|AF411835.1| scaffold3964 97.33 75 2 0 915  
989 107546 107472 4e-26 128  
gi|33347862|gb|AF411835.1| scaffold3964 92.21 77 4 1 998  
1072 107472 107548 5e-20 108  
gi|33347862|gb|AF411835.1| scaffold3551 95.51 156 7 0 915  
1070 63233 63388 9e-63 250  
gi|33347862|gb|AF411835.1| scaffold3440 95.51 156 7 0 915  
1070 178130 177975 9e-63 250  
gi|33347862|gb|AF411835.1| scaffold3440 89.31 159 13 3 914  
1070 177974 178130 1e-46 196  
gi|33347862|gb|AF411835.1| scaffold3136 95.51 156 7 0 915

1070 197107 196952 9e-63 250  
197  
gi|33347862|gb|AF411835.1| scaffold3126 95.51 156 7 0 915  
1070 161122 160967 9e-63 250  
gi|33347862|gb|AF411835.1| scaffold3126 88.75 160 14 3 914  
1071 160966 161123 1e-45 193  
gi|33347862|gb|AF411835.1| scaffold2975 95.51 156 7 0 915  
1070 120813 120658 9e-63 250  
gi|33347862|gb|AF411835.1| scaffold2975 87.97 158 15 3 915  
1070 120658 120813 9e-43 183  
gi|33347862|gb|AF411835.1| scaffold2830 95.51 156 7 0 915  
1070 134000 134155 9e-63 250  
gi|33347862|gb|AF411835.1| scaffold2830 88.61 158 14 3 915  
1070 134155 134000 2e-44 189  
gi|33347862|gb|AF411835.1| scaffold2736 95.51 156 7 0 915  
1070 162432 162277 9e-63 250  
gi|33347862|gb|AF411835.1| scaffold2736 88.61 158 14 3 915  
1070 162277 162432 2e-44 189  
gi|33347862|gb|AF411835.1| scaffold2687 95.51 156 7 0 915  
1070 195192 195037 9e-63 250  
gi|33347862|gb|AF411835.1| scaffold2687 87.97 158 15 3 915  
1070 195037 195192 9e-43 183  
gi|33347862|gb|AF411835.1| scaffold2631 95.51 156 7 0 915  
1070 13077 13232 9e-63 250  
gi|33347862|gb|AF411835.1| scaffold2631 90.57 159 11 2 915  
1071 13232 13076 5e-50 207  
gi|33347862|gb|AF411835.1| scaffold2493 95.51 156 7 0 915  
1070 167199 167044 9e-63 250  
gi|33347862|gb|AF411835.1| scaffold2493 88.61 158 14 3 915  
1070 167044 167199 2e-44 189  
gi|33347862|gb|AF411835.1| scaffold2493 100.00 33 0 0  
1038 1070 141959 141927 4e-06 62.1  
gi|33347862|gb|AF411835.1| scaffold2365 95.00 160 7 1 915  
1074 84371 84529 9e-63 250  
gi|33347862|gb|AF411835.1| scaffold2365 89.24 158 13 3 915  
1070 84526 84371 4e-46 195  
gi|33347862|gb|AF411835.1| scaffold2006 95.54 157 6 1 915  
1070 116663 116507 9e-63 250  
gi|33347862|gb|AF411835.1| scaffold2006 88.75 160 13 4 914  
1070 116506 116663 5e-45 191  
gi|33347862|gb|AF411835.1| scaffold1719 95.51 156 7 0 915  
1070 210392 210237 9e-63 250  
gi|33347862|gb|AF411835.1| scaffold1719 90.24 164 12 2 915  
1076 210237 210398 4e-51 211  
gi|33347862|gb|AF411835.1| scaffold1666 95.51 156 7 0 915  
1070 220437 220282 9e-63 250

gi|33347862|gb|AF411835.1| scaffold1666 88.82 161 14 3 914  
1072 220281 220439 4e-46 195  
gi|33347862|gb|AF411835.1| scaffold1666 88.50 113 11 1 908  
1020 147188 147298 3e-28 135  
gi|33347862|gb|AF411835.1| scaffold1528 95.51 156 7 0 915  
1070 271593 271438 9e-63 250  
gi|33347862|gb|AF411835.1| scaffold1528 87.42 159 16 3 915  
1071 271438 271594 1e-41 180  
198  
gi|33347862|gb|AF411835.1| scaffold696 95.51 156 7 0 915  
1070 195696 195541 9e-63 250  
gi|33347862|gb|AF411835.1| scaffold696 88.68 159 14 3 915  
1071 195541 195697 5e-45 191  
gi|33347862|gb|AF411835.1| scaffold592 95.51 156 7 0 915  
1070 169926 169771 9e-63 250  
gi|33347862|gb|AF411835.1| scaffold592 87.42 159 16 3 915  
1071 169771 169927 1e-41 180  
gi|33347862|gb|AF411835.1| scaffold587 95.54 157 6 1 915  
1070 386905 386749 9e-63 250  
gi|33347862|gb|AF411835.1| scaffold587 88.75 160 13 4 914  
1070 386748 386905 5e-45 191  
gi|33347862|gb|AF411835.1| scaffold426 95.51 156 7 0 915  
1070 64553 64398 9e-63 250  
gi|33347862|gb|AF411835.1| scaffold426 87.42 159 16 3 915  
1071 64398 64554 1e-41 180  
gi|33347862|gb|AF411835.1| scaffold316 95.51 156 7 0 915  
1070 174179 174024 9e-63 250  
gi|33347862|gb|AF411835.1| scaffold316 87.12 163 16 4 915  
1074 174024 174184 1e-41 180  
gi|33347862|gb|AF411835.1| scaffold170 95.51 156 7 0 915  
1070 570411 570256 9e-63 250  
gi|33347862|gb|AF411835.1| scaffold44 95.51 156 7 0 915 1070  
535432 535587 9e-63 250  
gi|33347862|gb|AF411835.1| scaffold44 91.19 159 11 2 915 1070  
427755 427597 1e-51 213  
gi|33347862|gb|AF411835.1| scaffold44 84.57 162 18 5 914 1070  
427596 427755 7e-34 154  
gi|33347862|gb|AF411835.1| scaffold16655 95.00 160 4 2 915  
1070 16159 16000 3e-62 248  
gi|33347862|gb|AF411835.1| scaffold16655 87.57 169 14 5 908  
1071 15994 16160 2e-44 189  
gi|33347862|gb|AF411835.1| scaffold16134 94.94 158 8 0 914  
1071 12777 12620 3e-62 248  
gi|33347862|gb|AF411835.1| scaffold16134 87.97 158 15 4 915  
1070 12621 12776 9e-43 183  
gi|33347862|gb|AF411835.1| scaffold10417 95.51 156 6 1 915

1070 25250 25096 3e-62 248  
gi|33347862|gb|AF411835.1| scaffold10417 88.75 160 13 4 914  
1071 25095 25251 5e-45 191  
gi|33347862|gb|AF411835.1| scaffold7161 95.51 156 6 1 915  
1070 78570 78724 3e-62 248  
gi|33347862|gb|AF411835.1| scaffold7161 95.95 148 6 0 915  
1062 35936 36083 5e-60 241  
gi|33347862|gb|AF411835.1| scaffold7161 87.50 160 15 4 914  
1071 78725 78569 1e-41 180  
gi|33347862|gb|AF411835.1| scaffold3749 95.48 155 7 0 916  
1070 105966 106120 3e-62 248  
gi|33347862|gb|AF411835.1| scaffold3749 87.43 167 16 4 906  
1069 106130 105966 7e-44 187  
gi|33347862|gb|AF411835.1| scaffold2801 93.94 165 9 1 918  
1081 162296 162460 3e-62 248  
199  
gi|33347862|gb|AF411835.1| scaffold514 94.94 158 8 0 914  
1071 371712 371555 3e-62 248  
gi|33347862|gb|AF411835.1| scaffold514 97.71 131 3 0 941  
1071 381238 381108 1e-55 226  
gi|33347862|gb|AF411835.1| scaffold514 93.85 130 6 2 915  
1044 381109 381236 4e-46 195  
gi|33347862|gb|AF411835.1| scaffold343 93.94 165 9 1 914  
1078 319379 319542 3e-62 248  
gi|33347862|gb|AF411835.1| scaffold343 94.90 157 8 0 915  
1071 220830 220674 1e-61 246  
gi|33347862|gb|AF411835.1| scaffold343 88.00 175 15 4 915  
1085 220675 220847 2e-48 202  
gi|33347862|gb|AF411835.1| scaffold343 87.65 162 15 4 912  
1070 319539 319380 9e-43 183  
gi|33347862|gb|AF411835.1| scaffold10907 94.90 157 8 0 915  
1071 29318 29162 1e-61 246  
gi|33347862|gb|AF411835.1| scaffold10907 86.79 159 17 3 915  
1071 29163 29319 5e-40 174  
gi|33347862|gb|AF411835.1| scaffold8589 94.90 157 8 0 915  
1071 43138 43294 1e-61 246  
gi|33347862|gb|AF411835.1| scaffold8589 91.77 158 9 2 915  
1070 43293 43138 9e-53 217  
gi|33347862|gb|AF411835.1| scaffold7904 94.90 157 8 0 914  
1070 74028 73872 1e-61 246  
gi|33347862|gb|AF411835.1| scaffold7904 89.87 158 12 2 915  
1070 73872 74027 9e-48 200  
gi|33347862|gb|AF411835.1| scaffold7782 94.90 157 8 0 914  
1070 39544 39388 1e-61 246  
gi|33347862|gb|AF411835.1| scaffold7767 94.94 158 7 1 914  
1070 80254 80097 1e-61 246

gi|33347862|gb|AF411835.1| scaffold7767 88.24 170 14 4 905  
1070 80086 80253 3e-47 198  
gi|33347862|gb|AF411835.1| scaffold6729 94.90 157 8 0 914  
1070 80389 80545 1e-61 246  
gi|33347862|gb|AF411835.1| scaffold6729 89.87 158 12 2 915  
1070 80545 80390 9e-48 200  
gi|33347862|gb|AF411835.1| scaffold5975 94.94 158 7 1 915  
1071 10653 10810 1e-61 246  
gi|33347862|gb|AF411835.1| scaffold5975 88.68 159 13 3 915  
1070 10809 10653 2e-44 189  
gi|33347862|gb|AF411835.1| scaffold5289 94.38 160 9 0 915  
1074 133244 133403 1e-61 246  
gi|33347862|gb|AF411835.1| scaffold5289 88.68 159 14 3 915  
1071 133399 133243 5e-45 191  
gi|33347862|gb|AF411835.1| scaffold4849 94.90 157 8 0 914  
1070 39838 39682 1e-61 246  
gi|33347862|gb|AF411835.1| scaffold4849 89.87 158 12 2 915  
1070 39682 39837 9e-48 200  
gi|33347862|gb|AF411835.1| scaffold4774 96.62 148 5 0 915  
1062 64108 64255 1e-61 246  
gi|33347862|gb|AF411835.1| scaffold4774 87.12 163 13 5 914  
1070 64268 64108 4e-41 178  
200  
gi|33347862|gb|AF411835.1| scaffold4048 95.45 154 7 0 914  
1067 154491 154644 1e-61 246  
gi|33347862|gb|AF411835.1| scaffold4048 87.65 162 15 4 912  
1070 154651 154492 9e-43 183  
gi|33347862|gb|AF411835.1| scaffold3491 94.90 157 8 0 915  
1071 1123 967 1e-61 246  
gi|33347862|gb|AF411835.1| scaffold3491 88.61 158 14 3 915  
1070 968 1123 2e-44 189  
gi|33347862|gb|AF411835.1| scaffold2813 95.45 154 7 0 915  
1068 13901 13748 1e-61 246  
gi|33347862|gb|AF411835.1| scaffold2506 94.90 157 8 0 915  
1071 185357 185201 1e-61 246  
gi|33347862|gb|AF411835.1| scaffold2506 89.87 158 12 2 915  
1070 185202 185357 9e-48 200  
gi|33347862|gb|AF411835.1| scaffold1834 94.41 161 8 1 915  
1074 18097 18257 1e-61 246  
gi|33347862|gb|AF411835.1| scaffold1834 87.73 163 15 4 912  
1071 18256 18096 2e-43 185  
gi|33347862|gb|AF411835.1| scaffold1499 94.90 157 8 0 915  
1071 1782 1626 1e-61 246  
gi|33347862|gb|AF411835.1| scaffold1499 87.97 158 15 3 915  
1070 1627 1782 9e-43 183  
gi|33347862|gb|AF411835.1| scaffold1090 94.90 157 8 0 914



1070 4211 4055 1e-61 246  
gi|33347862|gb|AF411835.1| scaffold1090 87.97 158 15 3 915  
1070 4055 4210 9e-43 183  
gi|33347862|gb|AF411835.1| scaffold513 94.90 157 8 0 915  
1071 21924 22080 1e-61 246  
gi|33347862|gb|AF411835.1| scaffold513 86.71 158 17 3 915  
1070 22079 21924 2e-39 172  
gi|33347862|gb|AF411835.1| scaffold326 94.41 161 7 1 912  
1070 300192 300352 1e-61 246  
gi|33347862|gb|AF411835.1| scaffold326 87.88 165 14 4 914  
1074 300353 300191 2e-44 189  
gi|33347862|gb|AF411835.1| scaffold140 94.41 161 7 2 912  
1070 604672 604832 1e-61 246  
gi|33347862|gb|AF411835.1| scaffold140 94.41 161 7 2 912  
1070 619731 619891 1e-61 246  
gi|33347862|gb|AF411835.1| scaffold140 88.48 165 13 4 914  
1074 604833 604671 4e-46 195  
gi|33347862|gb|AF411835.1| scaffold140 88.48 165 13 4 914  
1074 619892 619730 4e-46 195  
gi|33347862|gb|AF411835.1| scaffold16597 94.87 156 8 0 915  
1070 14060 14215 4e-61 244  
gi|33347862|gb|AF411835.1| scaffold16597 90.51 158 11 2 915  
1070 14215 14060 2e-49 206  
gi|33347862|gb|AF411835.1| scaffold15720 94.87 156 8 0 915  
1070 6083 6238 4e-61 244  
gi|33347862|gb|AF411835.1| scaffold15720 88.75 160 14 3 913  
1070 6240 6083 1e-45 193  
gi|33347862|gb|AF411835.1| scaffold11267 94.87 156 8 0 915  
1070 13934 14089 4e-61 244  
201  
gi|33347862|gb|AF411835.1| scaffold11267 88.61 158 14 3 915  
1070 14089 13934 2e-44 189  
gi|33347862|gb|AF411835.1| scaffold11022 94.87 156 8 0 915  
1070 9113 9268 4e-61 244  
gi|33347862|gb|AF411835.1| scaffold9828 94.87 156 8 0 915  
1070 49017 49172 4e-61 244  
gi|33347862|gb|AF411835.1| scaffold9828 88.68 159 14 3 915  
1071 49172 49016 5e-45 191  
gi|33347862|gb|AF411835.1| scaffold8775 94.90 157 6 1 914  
1070 1741 1587 4e-61 244  
gi|33347862|gb|AF411835.1| scaffold6875 94.87 156 8 0 915  
1070 2908 3063 4e-61 244  
gi|33347862|gb|AF411835.1| scaffold6875 88.61 158 14 3 915  
1070 3063 2908 2e-44 189  
gi|33347862|gb|AF411835.1| scaffold6395 94.87 156 8 0 915  
1070 63809 63654 4e-61 244

gi|33347862|gb|AF411835.1| scaffold6395 88.05 159 15 2 915  
1071 63654 63810 2e-43 185  
gi|33347862|gb|AF411835.1| scaffold6221 94.87 156 8 0 915  
1070 97750 97905 4e-61 244  
gi|33347862|gb|AF411835.1| scaffold6221 89.87 158 12 2 915  
1070 97905 97750 9e-48 200  
gi|33347862|gb|AF411835.1| scaffold6162 94.87 156 8 0 915  
1070 78431 78586 4e-61 244  
gi|33347862|gb|AF411835.1| scaffold6162 88.75 160 14 3 914  
1071 78587 78430 1e-45 193  
gi|33347862|gb|AF411835.1| scaffold6134 94.87 156 8 0 915  
1070 5195 5350 4e-61 244  
gi|33347862|gb|AF411835.1| scaffold6134 89.38 160 13 3 914  
1071 5351 5194 3e-47 198  
gi|33347862|gb|AF411835.1| scaffold6079 94.87 156 8 0 915  
1070 82568 82413 4e-61 244  
gi|33347862|gb|AF411835.1| scaffold6079 88.68 159 14 2 915  
1071 82413 82569 5e-45 191  
gi|33347862|gb|AF411835.1| scaffold5681 94.87 156 8 0 915  
1070 101791 101946 4e-61 244  
gi|33347862|gb|AF411835.1| scaffold5681 88.05 159 15 3 914  
1070 101947 101791 2e-43 185  
gi|33347862|gb|AF411835.1| scaffold5610 94.87 156 8 0 915  
1070 111701 111856 4e-61 244  
gi|33347862|gb|AF411835.1| scaffold5610 88.68 159 14 3 914  
1070 111857 111701 5e-45 191  
gi|33347862|gb|AF411835.1| scaffold3682 94.87 156 8 0 915  
1070 52679 52834 4e-61 244  
gi|33347862|gb|AF411835.1| scaffold3682 86.71 158 17 3 915  
1070 52834 52679 2e-39 172  
gi|33347862|gb|AF411835.1| scaffold3114 94.87 156 8 0 915  
1070 40916 41071 4e-61 244  
gi|33347862|gb|AF411835.1| scaffold3114 90.91 165 10 3 911  
1072 41076 40914 9e-53 217  
gi|33347862|gb|AF411835.1| scaffold3010 95.42 153 7 0 917  
1069 67222 67374 4e-61 244  
202  
gi|33347862|gb|AF411835.1| scaffold3010 87.74 155 15 3 916  
1068 67374 67222 4e-41 178  
gi|33347862|gb|AF411835.1| scaffold2891 94.34 159 9 0 912  
1070 174191 174349 4e-61 244  
gi|33347862|gb|AF411835.1| scaffold2891 87.42 159 16 3 914  
1070 174350 174194 1e-41 180  
gi|33347862|gb|AF411835.1| scaffold2570 94.87 156 8 0 915  
1070 197320 197165 4e-61 244  
gi|33347862|gb|AF411835.1| scaffold2570 90.00 160 12 2 914

1071 197164 197321 7e-49 204  
gi|33347862|gb|AF411835.1| scaffold1991 94.87 156 8 0 915  
1070 104183 104338 4e-61 244  
gi|33347862|gb|AF411835.1| scaffold1709 94.87 156 8 0 915  
1070 101147 100992 4e-61 244  
gi|33347862|gb|AF411835.1| scaffold1709 91.36 162 9 3 915  
1073 100992 101151 9e-53 217  
gi|33347862|gb|AF411835.1| scaffold1665 94.87 156 8 0 915  
1070 240105 239950 4e-61 244  
gi|33347862|gb|AF411835.1| scaffold1665 88.41 164 15 3 915  
1076 239950 240111 4e-46 195  
gi|33347862|gb|AF411835.1| scaffold1248\_0 94.87 156 8 0 915  
1070 36073 36228 4e-61 244  
gi|33347862|gb|AF411835.1| scaffold1174 94.87 156 8 0 915  
1070 249417 249262 4e-61 244  
gi|33347862|gb|AF411835.1| scaffold1174 90.00 160 12 2 914  
1071 249261 249418 7e-49 204  
gi|33347862|gb|AF411835.1| scaffold823 94.87 156 8 0 915  
1070 171224 171069 4e-61 244  
gi|33347862|gb|AF411835.1| scaffold823 89.24 158 13 3 915  
1070 171069 171224 4e-46 195  
gi|33347862|gb|AF411835.1| scaffold796 94.34 159 9 0 914  
1072 147718 147560 4e-61 244  
gi|33347862|gb|AF411835.1| scaffold796 91.14 158 10 2 915  
1070 147562 147717 4e-51 211  
gi|33347862|gb|AF411835.1| scaffold279 95.42 153 7 0 915  
1067 248559 248407 4e-61 244  
gi|33347862|gb|AF411835.1| scaffold279 89.68 155 12 3 918  
1070 248407 248559 4e-46 195  
gi|33347862|gb|AF411835.1| scaffold19415 94.30 158 9 0 914  
1071 1982 1825 1e-60 243  
gi|33347862|gb|AF411835.1| scaffold19415 91.14 158 10 2 915  
1070 1826 1981 4e-51 211  
gi|33347862|gb|AF411835.1| scaffold10179 94.30 158 9 0 914  
1071 35315 35158 1e-60 243  
gi|33347862|gb|AF411835.1| scaffold10179 87.34 158 16 3 915  
1070 35159 35314 4e-41 178  
gi|33347862|gb|AF411835.1| scaffold6626 93.83 162 9 1 914  
1074 93438 93599 1e-60 243  
gi|33347862|gb|AF411835.1| scaffold6626 87.65 162 15 4 912  
1070 93598 93439 9e-43 183  
gi|33347862|gb|AF411835.1| scaffold5079 93.87 163 6 3 913  
1071 14509 14347 1e-60 243  
203  
gi|33347862|gb|AF411835.1| scaffold5079 87.26 157 16 2 915  
1067 14348 14504 1e-40 176

gi|33347862|gb|AF411835.1| scaffold1409 95.97 149 6 0 919  
1067 103600 103748 1e-60 243  
gi|33347862|gb|AF411835.1| scaffold1409 87.42 151 15 3 918  
1066 103748 103600 7e-39 171  
gi|33347862|gb|AF411835.1| scaffold989 94.30 158 9 0 915  
1072 212156 211999 1e-60 243  
gi|33347862|gb|AF411835.1| scaffold989 88.89 162 13 3 915  
1074 212001 212159 4e-46 195  
gi|33347862|gb|AF411835.1| scaffold17176 94.81 154 8 0 918  
1071 7586 7739 5e-60 241  
gi|33347862|gb|AF411835.1| scaffold17176 87.74 155 15 3 915  
1067 7738 7586 4e-41 178  
gi|33347862|gb|AF411835.1| scaffold11896 94.27 157 9 0 914  
1070 11223 11379 5e-60 241  
gi|33347862|gb|AF411835.1| scaffold11896 89.87 158 12 3 915  
1070 11379 11224 9e-48 200  
gi|33347862|gb|AF411835.1| scaffold6844 94.81 154 8 0 918  
1071 77751 77904 5e-60 241  
gi|33347862|gb|AF411835.1| scaffold6844 86.45 155 17 3 915  
1067 77903 77751 9e-38 167  
gi|33347862|gb|AF411835.1| scaffold5903 95.39 152 6 1 920  
1071 37136 37286 5e-60 241  
gi|33347862|gb|AF411835.1| scaffold5903 86.25 160 18 3 915  
1072 37285 37128 7e-39 171  
gi|33347862|gb|AF411835.1| scaffold4316 93.79 161 9 1 915  
1075 113375 113534 5e-60 241  
gi|33347862|gb|AF411835.1| scaffold4239 96.55 145 5 0 914  
1058 101118 101262 5e-60 241  
gi|33347862|gb|AF411835.1| scaffold4239 91.54 130 9 1 943  
1070 101248 101119 4e-41 178  
gi|33347862|gb|AF411835.1| scaffold3877 94.34 159 5 3 915  
1070 21150 20993 5e-60 241  
gi|33347862|gb|AF411835.1| scaffold3877 87.12 163 13 6 913  
1070 20991 21150 4e-41 178  
gi|33347862|gb|AF411835.1| scaffold2325 94.27 157 9 0 915  
1071 174569 174413 5e-60 241  
gi|33347862|gb|AF411835.1| scaffold2325 89.31 159 13 2 915  
1071 174414 174570 1e-46 196  
gi|33347862|gb|AF411835.1| scaffold2304 94.30 158 8 1 914  
1070 87616 87773 5e-60 241  
gi|33347862|gb|AF411835.1| scaffold2304 88.34 163 13 4 911  
1070 87776 87617 5e-45 191  
gi|33347862|gb|AF411835.1| scaffold502 94.27 157 9 0 915  
1071 210101 209945 5e-60 241  
gi|33347862|gb|AF411835.1| scaffold502 93.33 135 7 1 928  
1060 208935 208801 3e-47 198

gi|33347862|gb|AF411835.1| scaffold502 95.08 122 6 0 927  
1048 208803 208924 1e-45 193  
gi|33347862|gb|AF411835.1| scaffold502 87.97 158 15 3 915  
1070 209946 210101 9e-43 183  
204  
gi|33347862|gb|AF411835.1| scaffold13908 94.27 157 8 1 915  
1070 29216 29372 2e-59 239  
gi|33347862|gb|AF411835.1| scaffold13908 89.63 164 13 3 910  
1071 29376 29215 2e-49 206  
gi|33347862|gb|AF411835.1| scaffold10313 94.23 156 9 0 915  
1070 2808 2963 2e-59 239  
gi|33347862|gb|AF411835.1| scaffold10313 90.06 161 12 3 915  
1073 2963 2805 2e-49 206  
gi|33347862|gb|AF411835.1| scaffold8562 94.77 153 8 0 917  
1069 752 600 2e-59 239  
gi|33347862|gb|AF411835.1| scaffold6496 94.23 156 9 0 915  
1070 60704 60859 2e-59 239  
gi|33347862|gb|AF411835.1| scaffold6496 89.24 158 13 2 915  
1070 60859 60704 4e-46 195  
gi|33347862|gb|AF411835.1| scaffold3495 94.23 156 9 0 915  
1070 133480 133635 2e-59 239  
gi|33347862|gb|AF411835.1| scaffold3495 87.34 158 16 3 915  
1070 133635 133480 4e-41 178  
gi|33347862|gb|AF411835.1| scaffold3173 96.53 144 5 0 927  
1070 192978 192835 2e-59 239  
gi|33347862|gb|AF411835.1| scaffold3173 90.60 149 10 3 915  
1061 192835 192981 4e-46 195  
gi|33347862|gb|AF411835.1| scaffold1884 94.23 156 9 0 915  
1070 910 755 2e-59 239  
gi|33347862|gb|AF411835.1| scaffold1884 90.06 161 12 2 915  
1073 755 913 2e-49 206  
gi|33347862|gb|AF411835.1| scaffold1887 94.23 156 9 0 915  
1070 244411 244256 2e-59 239  
gi|33347862|gb|AF411835.1| scaffold1887 89.24 158 13 2 915  
1070 244256 244411 4e-46 195  
gi|33347862|gb|AF411835.1| scaffold1383 94.23 156 9 0 915  
1070 128997 128842 2e-59 239  
gi|33347862|gb|AF411835.1| scaffold1383 89.31 159 13 2 915  
1071 128842 128998 1e-46 196  
gi|33347862|gb|AF411835.1| scaffold1283 94.23 156 9 0 915  
1070 232264 232109 2e-59 239  
gi|33347862|gb|AF411835.1| scaffold1138 94.23 156 9 0 915  
1070 306599 306444 2e-59 239  
gi|33347862|gb|AF411835.1| scaffold1138 89.44 161 13 2 914  
1072 306443 306601 9e-48 200  
gi|33347862|gb|AF411835.1| scaffold1151 94.23 156 9 0 915

1070 320531 320686 2e-59 239  
gi|33347862|gb|AF411835.1| scaffold546 93.71 159 10 0 913  
1071 96712 96870 2e-59 239  
gi|33347862|gb|AF411835.1| scaffold546 86.71 158 17 3 915  
1070 96869 96714 2e-39 172  
gi|33347862|gb|AF411835.1| scaffold160 96.53 144 5 0 927  
1070 63493 63350 2e-59 239  
gi|33347862|gb|AF411835.1| scaffold160 90.30 134 11 2 915  
1048 63350 63481 5e-40 174  
gi|33347862|gb|AF411835.1| scaffold80 94.23 156 9 0 915 1070  
496588 496433 2e-59 239  
205  
gi|33347862|gb|AF411835.1| scaffold49 94.23 156 9 0 915 1070  
347716 347871 2e-59 239  
gi|33347862|gb|AF411835.1| scaffold49 88.68 159 12 3 915 1070  
347871 347716 2e-44 189  
gi|33347862|gb|AF411835.1| scaffold12865 93.71 159 8 2 915  
1071 33587 33745 7e-59 237  
gi|33347862|gb|AF411835.1| scaffold1555 94.23 156 8 1 914  
1068 57698 57853 7e-59 237  
gi|33347862|gb|AF411835.1| scaffold1555 85.80 162 17 5 913  
1070 57858 57699 9e-38 167  
gi|33347862|gb|AF411835.1| scaffold1317 94.27 157 5 2 915  
1071 142376 142224 7e-59 237  
gi|33347862|gb|AF411835.1| scaffold1317 92.42 132 8 1 943  
1072 142247 142378 7e-44 187  
gi|33347862|gb|AF411835.1| scaffold320 94.74 152 8 0 918  
1069 568 417 7e-59 237  
gi|33347862|gb|AF411835.1| scaffold320 88.31 154 14 3 916  
1067 417 568 3e-42 182  
gi|33347862|gb|AF411835.1| scaffold320 94.44 72 3 1 915  
985 485132 485203 2e-20 110  
gi|33347862|gb|AF411835.1| scaffold320 86.30 73 7 2 1002  
1071 485203 485131 2e-10 76.8  
gi|33347862|gb|AF411835.1| scaffold996521 99.24 131 0 1 620  
749 1 131 2e-58 235  
gi|33347862|gb|AF411835.1| scaffold16883 94.16 154 9 0 917  
1070 4873 5026 2e-58 235  
gi|33347862|gb|AF411835.1| scaffold16883 89.10 156 13 2 915  
1068 5026 4873 5e-45 191  
gi|33347862|gb|AF411835.1| scaffold11250 94.16 154 9 0 918  
1071 47968 48121 2e-58 235  
gi|33347862|gb|AF411835.1| scaffold10186 95.27 148 7 0 911  
1058 21226 21079 2e-58 235  
gi|33347862|gb|AF411835.1| scaffold5077 96.50 143 4 1 932  
1074 77473 77614 2e-58 235

gi|33347862|gb|AF411835.1| scaffold5077 91.04 134 10 2 915  
1048 77611 77480 1e-41 180  
gi|33347862|gb|AF411835.1| scaffold5077 94.59 111 6 0 939  
1049 124897 124787 2e-39 172  
gi|33347862|gb|AF411835.1| scaffold5077 94.59 111 6 0 939  
1049 124788 124898 2e-39 172  
gi|33347862|gb|AF411835.1| scaffold4477 93.63 157 10 0 914  
1070 87590 87746 2e-58 235  
gi|33347862|gb|AF411835.1| scaffold3001 94.70 151 8 0 915  
1065 3249 3099 2e-58 235  
gi|33347862|gb|AF411835.1| scaffold3001 92.31 130 8 2 943  
1070 3120 3249 9e-43 183  
gi|33347862|gb|AF411835.1| scaffold939 93.63 157 10 0 914  
1070 200973 200817 2e-58 235  
gi|33347862|gb|AF411835.1| scaffold939 87.57 169 16 3 905  
1070 200806 200972 5e-45 191  
gi|33347862|gb|AF411835.1| scaffold46823 93.21 162 5 1 915  
1070 120 281 9e-58 233  
206  
gi|33347862|gb|AF411835.1| scaffold46823 86.59 164 12 4 915  
1070 281 120 2e-39 172  
gi|33347862|gb|AF411835.1| scaffold13155 93.59 156 10 0 915  
1070 8946 8791 9e-58 233  
gi|33347862|gb|AF411835.1| scaffold13155 93.13 131 7 1 943  
1071 8817 8947 5e-45 191  
gi|33347862|gb|AF411835.1| scaffold11489 93.59 156 10 0 915  
1070 28124 27969 9e-58 233  
gi|33347862|gb|AF411835.1| scaffold11489 89.38 160 13 2 915  
1072 27969 28126 3e-47 198  
gi|33347862|gb|AF411835.1| scaffold8599 93.59 156 10 0 915  
1070 38038 38193 9e-58 233  
gi|33347862|gb|AF411835.1| scaffold7684 93.59 156 10 0 915  
1070 22388 22233 9e-58 233  
gi|33347862|gb|AF411835.1| scaffold7684 88.12 160 15 3 914  
1071 22232 22389 7e-44 187  
gi|33347862|gb|AF411835.1| scaffold7684 97.33 75 2 0 917  
991 15968 15894 4e-26 128  
gi|33347862|gb|AF411835.1| scaffold7684 92.21 77 4 1 994  
1068 15892 15968 5e-20 108  
gi|33347862|gb|AF411835.1| scaffold6899 93.59 156 10 0 915  
1070 58559 58714 9e-58 233  
gi|33347862|gb|AF411835.1| scaffold6512 94.12 153 9 0 916  
1068 88864 89016 9e-58 233  
gi|33347862|gb|AF411835.1| scaffold5550 93.59 156 10 0 915  
1070 57221 57066 9e-58 233  
gi|33347862|gb|AF411835.1| scaffold5550 87.42 159 16 3 915

1071 57066 57222 1e-41 180  
gi|33347862|gb|AF411835.1| scaffold5037 93.12 160 9 2 915  
1072 68414 68255 9e-58 233  
gi|33347862|gb|AF411835.1| scaffold5037 88.12 160 13 4 915  
1070 68257 68414 2e-43 185  
gi|33347862|gb|AF411835.1| scaffold4152 93.17 161 7 2 915  
1071 121199 121039 9e-58 233  
gi|33347862|gb|AF411835.1| scaffold4152 87.88 165 15 4 912  
1071 121036 121200 2e-44 189  
gi|33347862|gb|AF411835.1| scaffold3013 93.08 159 11 0 915  
1073 140881 140723 9e-58 233  
gi|33347862|gb|AF411835.1| scaffold2267 93.59 156 10 0 915  
1070 201466 201621 9e-58 233  
gi|33347862|gb|AF411835.1| scaffold2267 87.42 159 16 3 915  
1071 201621 201465 1e-41 180  
gi|33347862|gb|AF411835.1| scaffold1523 93.17 161 7 2 915  
1071 272250 272090 9e-58 233  
gi|33347862|gb|AF411835.1| scaffold1523 87.88 165 15 4 912  
1071 272087 272251 2e-44 189  
gi|33347862|gb|AF411835.1| scaffold910\_0 93.08 159 11 0 915  
1073 16763 16921 9e-58 233  
gi|33347862|gb|AF411835.1| scaffold910\_0 87.97 158 15 3 915  
1070 16918 16763 9e-43 183  
gi|33347862|gb|AF411835.1| scaffold666 93.63 157 9 1 915  
1071 169097 168942 9e-58 233  
207  
gi|33347862|gb|AF411835.1| scaffold73 94.12 153 9 0 918 1070  
581100 581252 9e-58 233  
gi|33347862|gb|AF411835.1| scaffold54 93.12 160 10 1 912 1070  
390325 390484 9e-58 233  
gi|33347862|gb|AF411835.1| scaffold54 93.12 160 10 1 912 1070  
392394 392553 9e-58 233  
gi|33347862|gb|AF411835.1| scaffold54 92.99 157 11 0 915 1071  
618482 618326 1e-56 230  
gi|33347862|gb|AF411835.1| scaffold54 88.75 160 14 2 914 1071  
390485 390328 1e-45 193  
gi|33347862|gb|AF411835.1| scaffold54 88.75 160 14 2 914 1071  
392554 392397 1e-45 193  
gi|33347862|gb|AF411835.1| scaffold24 95.24 147 7 0 924 1070  
815215 815361 9e-58 233  
gi|33347862|gb|AF411835.1| scaffold24 95.28 106 5 0 943 1048  
815335 815230 2e-38 169  
gi|33347862|gb|AF411835.1| scaffold7862 96.43 140 5 0 914  
1053 76956 76817 3e-57 231  
gi|33347862|gb|AF411835.1| scaffold7862 92.31 130 8 1 943  
1070 76826 76955 9e-43 183



gi|33347862|gb|AF411835.1| scaffold6762 94.70 151 4 1 915  
1061 28957 29107 3e-57 231  
gi|33347862|gb|AF411835.1| scaffold6762 88.89 135 9 3 943  
1071 29090 28956 4e-36 161  
gi|33347862|gb|AF411835.1| scaffold11332 92.64 163 7 2 914  
1071 47231 47393 1e-56 230  
gi|33347862|gb|AF411835.1| scaffold3770 92.99 157 11 0 914  
1070 163862 164018 1e-56 230  
gi|33347862|gb|AF411835.1| scaffold3770 88.34 163 14 3 910  
1070 164022 163863 5e-45 191  
gi|33347862|gb|AF411835.1| scaffold19915 92.50 160 11 1 915  
1074 6647 6489 4e-56 228  
gi|33347862|gb|AF411835.1| scaffold19915 87.97 158 15 3 915  
1070 6492 6647 9e-43 183  
gi|33347862|gb|AF411835.1| scaffold18954 92.95 156 11 0 915  
1070 3389 3544 4e-56 228  
gi|33347862|gb|AF411835.1| scaffold11706 92.02 163 11 2 910  
1070 45132 44970 4e-56 228  
gi|33347862|gb|AF411835.1| scaffold10682 92.95 156 11 0 915  
1070 33807 33962 4e-56 228  
gi|33347862|gb|AF411835.1| scaffold10682 92.48 133 3 4 915  
1040 22306 22174 9e-43 183  
gi|33347862|gb|AF411835.1| scaffold10682 94.69 113 6 0 958  
1070 22175 22063 1e-40 176  
gi|33347862|gb|AF411835.1| scaffold10682 85.19 162 19 4 915  
1074 33962 33804 4e-36 161  
gi|33347862|gb|AF411835.1| scaffold10682 94.85 97 5 0 947  
1043 22174 22270 2e-33 152  
gi|33347862|gb|AF411835.1| scaffold10682 88.70 115 11 2 915  
1029 22063 22175 2e-29 139  
gi|33347862|gb|AF411835.1| scaffold10175 92.95 156 11 0 915  
1070 24183 24338 4e-56 228  
208  
gi|33347862|gb|AF411835.1| scaffold10175 87.73 163 15 4 915  
1074 24338 24178 2e-43 185  
gi|33347862|gb|AF411835.1| scaffold5126 92.95 156 11 0 915  
1070 62506 62661 4e-56 228  
gi|33347862|gb|AF411835.1| scaffold1326 91.57 166 13 1 909  
1073 269269 269434 4e-56 228  
gi|33347862|gb|AF411835.1| scaffold1326 87.79 172 16 3 910  
1078 269436 269267 1e-46 196  
gi|33347862|gb|AF411835.1| scaffold643 93.04 158 7 2 914  
1070 58457 58611 4e-56 228  
gi|33347862|gb|AF411835.1| scaffold643 84.91 159 16 5 915  
1070 58611 58458 7e-34 154  
gi|33347862|gb|AF411835.1| scaffold540 92.95 156 11 0 915

1070 229081 229236 4e-56 228  
gi|33347862|gb|AF411835.1| scaffold540 88.05 159 15 2 915  
1071 229236 229080 2e-43 185  
gi|33347862|gb|AF411835.1| scaffold420 92.95 156 11 0 915  
1070 393017 392862 4e-56 228  
gi|33347862|gb|AF411835.1| scaffold420 88.20 161 15 3 913  
1071 392860 393018 2e-44 189  
gi|33347862|gb|AF411835.1| scaffold11588 92.99 157 7 3 915  
1071 12826 12978 1e-55 226  
gi|33347862|gb|AF411835.1| scaffold11588 84.81 158 16 6 915  
1070 12977 12826 2e-33 152  
gi|33347862|gb|AF411835.1| scaffold10475 92.99 157 7 3 915  
1071 797 949 1e-55 226  
gi|33347862|gb|AF411835.1| scaffold10475 84.81 158 16 6 915  
1070 948 797 2e-33 152  
gi|33347862|gb|AF411835.1| scaffold8668 95.10 143 7 0 918  
1060 13950 14092 1e-55 226  
gi|33347862|gb|AF411835.1| scaffold5951 97.71 131 3 0 915  
1045 45856 45726 1e-55 226  
gi|33347862|gb|AF411835.1| scaffold5951 91.54 130 9 1 943  
1070 45727 45856 4e-41 178  
gi|33347862|gb|AF411835.1| scaffold1507 92.41 158 12 0 915  
1072 41292 41449 1e-55 226  
gi|33347862|gb|AF411835.1| scaffold1507 86.16 159 18 3 915  
1071 41447 41291 2e-38 169  
gi|33347862|gb|AF411835.1| scaffold84328 92.41 158 10 2 915  
1070 522 679 5e-55 224  
gi|33347862|gb|AF411835.1| scaffold84328 92.41 158 10 1 915  
1070 679 522 5e-55 224  
gi|33347862|gb|AF411835.1| scaffold15673 92.99 157 4 2 915  
1071 17548 17399 2e-54 222  
gi|33347862|gb|AF411835.1| scaffold15673 84.81 158 13 5 915  
1070 17400 17548 3e-32 148  
gi|33347862|gb|AF411835.1| scaffold14217 92.31 156 12 0 915  
1070 12860 12705 2e-54 222  
gi|33347862|gb|AF411835.1| scaffold12806 92.99 157 4 2 915  
1071 2730 2879 2e-54 222  
gi|33347862|gb|AF411835.1| scaffold12806 84.81 158 13 5 915  
1070 2878 2730 3e-32 148  
209  
gi|33347862|gb|AF411835.1| scaffold12438 92.31 156 12 0 915  
1070 28770 28925 2e-54 222  
gi|33347862|gb|AF411835.1| scaffold12438 88.75 160 14 2 915  
1072 28925 28768 1e-45 193  
gi|33347862|gb|AF411835.1| scaffold8710 92.02 163 6 4 915  
1070 53818 53980 2e-54 222

gi|33347862|gb|AF411835.1| scaffold8710 96.06 127 5 0 944  
1070 54802 54928 5e-50 207  
gi|33347862|gb|AF411835.1| scaffold8710 90.70 129 10 2 915  
1043 54928 54802 7e-39 171  
gi|33347862|gb|AF411835.1| scaffold8710 89.92 129 11 2 915  
1043 53980 53854 3e-37 165  
gi|33347862|gb|AF411835.1| scaffold7877 92.36 157 11 1 915  
1070 12522 12678 2e-54 222  
gi|33347862|gb|AF411835.1| scaffold7877 86.16 159 17 4 915  
1070 12678 12522 9e-38 167  
gi|33347862|gb|AF411835.1| scaffold2702 92.31 156 12 0 915  
1070 38055 38210 2e-54 222  
gi|33347862|gb|AF411835.1| scaffold2702 88.68 159 14 2 915  
1071 38210 38054 5e-45 191  
gi|33347862|gb|AF411835.1| scaffold2544 91.88 160 11 1 914  
1071 53785 53626 2e-54 222  
gi|33347862|gb|AF411835.1| scaffold2544 92.26 155 10 1 915  
1067 53627 53781 2e-53 219  
gi|33347862|gb|AF411835.1| scaffold2205 92.36 157 11 1 915  
1070 75261 75105 2e-54 222  
gi|33347862|gb|AF411835.1| scaffold2051 92.31 156 12 0 915  
1070 108356 108201 2e-54 222  
gi|33347862|gb|AF411835.1| scaffold2051 88.05 159 15 2 914  
1070 108200 108356 2e-43 185  
gi|33347862|gb|AF411835.1| scaffold1610 92.31 156 12 0 915  
1070 97182 97337 2e-54 222  
gi|33347862|gb|AF411835.1| scaffold1610 92.31 130 8 1 943  
1070 97311 97182 9e-43 183  
gi|33347862|gb|AF411835.1| scaffold1364 92.81 153 11 0 915  
1067 122367 122215 2e-54 222  
gi|33347862|gb|AF411835.1| scaffold1364 87.20 164 16 3 911  
1071 122207 122368 3e-42 182  
gi|33347862|gb|AF411835.1| scaffold1243 92.31 156 12 0 915  
1070 221448 221293 2e-54 222  
gi|33347862|gb|AF411835.1| scaffold1243 87.97 158 15 2 915  
1070 221293 221448 9e-43 183  
gi|33347862|gb|AF411835.1| scaffold995 91.62 167 5 2 913  
1070 259729 259563 2e-54 222  
gi|33347862|gb|AF411835.1| scaffold995 84.52 168 13 5 914  
1070 259562 259727 7e-34 154  
gi|33347862|gb|AF411835.1| scaffold104 92.31 156 12 0 915  
1070 575667 575822 2e-54 222  
gi|33347862|gb|AF411835.1| scaffold104 86.88 160 17 2 914  
1071 575823 575666 1e-40 176  
gi|33347862|gb|AF411835.1| scaffold15842 92.45 159 5 2 913  
1070 12280 12128 7e-54 220

210

gi|33347862|gb|AF411835.1| scaffold15842 84.71 157 14 6 914  
1068 12127 12275 3e-32 148  
gi|33347862|gb|AF411835.1| scaffold9977 92.31 156 11 1 915  
1070 53457 53303 7e-54 220  
gi|33347862|gb|AF411835.1| scaffold2882 99.18 122 1 0 917  
1038 90964 90843 7e-54 220  
gi|33347862|gb|AF411835.1| scaffold2882 92.06 126 7 2 949  
1071 90843 90968 5e-40 174  
gi|33347862|gb|AF411835.1| scaffold811 94.44 144 6 2 928  
1070 295401 295543 7e-54 220  
gi|33347862|gb|AF411835.1| scaffold811 88.81 134 12 3 915  
1048 295543 295413 4e-36 161  
gi|33347862|gb|AF411835.1| scaffold454 98.40 125 2 0 915  
1039 133599 133475 7e-54 220  
gi|33347862|gb|AF411835.1| scaffold454 93.60 125 6 1 948  
1070 133475 133599 2e-43 185  
gi|33347862|gb|AF411835.1| scaffold454 98.81 84 1 0 987  
1070 132583 132500 9e-33 150  
gi|33347862|gb|AF411835.1| scaffold454 90.70 86 6 2 915  
1000 132500 132583 1e-21 113  
gi|33347862|gb|AF411835.1| scaffold152 91.77 158 13 0 914  
1071 167845 167688 7e-54 220  
gi|33347862|gb|AF411835.1| scaffold129 95.65 138 5 1 935  
1071 299297 299160 7e-54 220  
gi|33347862|gb|AF411835.1| scaffold78 92.36 157 9 2 915 1071  
126380 126533 7e-54 220  
gi|33347862|gb|AF411835.1| scaffold9449 98.39 124 2 0 915  
1038 57785 57662 2e-53 219  
gi|33347862|gb|AF411835.1| scaffold9449 91.94 124 8 1 949  
1070 57662 57785 2e-39 172  
gi|33347862|gb|AF411835.1| scaffold3281 95.59 136 6 0 936  
1071 89359 89494 2e-53 219  
gi|33347862|gb|AF411835.1| scaffold3281 90.30 134 11 1 915  
1048 89493 89362 5e-40 174  
gi|33347862|gb|AF411835.1| scaffold234 92.72 151 11 0 921  
1071 373150 373000 2e-53 219  
gi|33347862|gb|AF411835.1| scaffold234 86.18 152 17 3 915  
1064 373001 373150 4e-36 161  
gi|33347862|gb|AF411835.1| scaffold17808 94.93 138 7 0 915  
1052 6040 5903 9e-53 217  
gi|33347862|gb|AF411835.1| scaffold14952 91.67 156 13 0 915  
1070 9034 9189 9e-53 217  
gi|33347862|gb|AF411835.1| scaffold14952 88.05 159 15 2 914  
1070 9190 9034 2e-43 185  
gi|33347862|gb|AF411835.1| scaffold5872 92.67 150 11 0 921

1070 120736 120885 9e-53 217  
gi|33347862|gb|AF411835.1| scaffold5162 94.33 141 8 0 915  
1055 63323 63183 9e-53 217  
gi|33347862|gb|AF411835.1| scaffold5162 88.55 131 13 1 943  
1071 63194 63324 5e-35 158  
gi|33347862|gb|AF411835.1| scaffold2300 91.67 156 13 0 915  
1070 117061 117216 9e-53 217  
211  
gi|33347862|gb|AF411835.1| scaffold1915 94.93 138 7 0 915  
1052 267996 268133 9e-53 217  
gi|33347862|gb|AF411835.1| scaffold1669 91.72 157 12 1 915  
1070 243564 243408 9e-53 217  
gi|33347862|gb|AF411835.1| scaffold1669 85.53 159 18 4 915  
1070 243408 243564 4e-36 161  
gi|33347862|gb|AF411835.1| scaffold1463 91.67 156 11 2 915  
1070 6403 6250 3e-52 215  
gi|33347862|gb|AF411835.1| scaffold1463 86.14 166 16 6 909  
1071 6243 6404 2e-39 172  
gi|33347862|gb|AF411835.1| scaffold12376 91.14 158 13 1 914  
1070 5839 5996 1e-51 213  
gi|33347862|gb|AF411835.1| scaffold12376 87.42 159 15 4 915  
1070 5996 5840 4e-41 178  
gi|33347862|gb|AF411835.1| scaffold7221 97.58 124 3 0 915  
1038 24129 24252 1e-51 213  
gi|33347862|gb|AF411835.1| scaffold7221 91.94 124 8 1 949  
1070 24252 24129 2e-39 172  
gi|33347862|gb|AF411835.1| scaffold461 94.20 138 8 0 915  
1052 11294 11157 4e-51 211  
gi|33347862|gb|AF411835.1| scaffold461 90.00 130 11 1 943  
1070 11165 11294 9e-38 167  
gi|33347862|gb|AF411835.1| scaffold187835 97.54 122 3 0 949  
1070 359 238 1e-50 209  
gi|33347862|gb|AF411835.1| scaffold187835 91.13 124 9 1 915  
1038 238 359 9e-38 167  
gi|33347862|gb|AF411835.1| scaffold1935 94.78 134 7 0 937  
1070 197620 197487 1e-50 209  
gi|33347862|gb|AF411835.1| scaffold1935 91.43 140 7 4 910  
1048 197483 197618 7e-44 187  
gi|33347862|gb|AF411835.1| scaffold11083 95.38 130 6 0 943  
1072 33867 33996 5e-50 207  
gi|33347862|gb|AF411835.1| scaffold11083 96.30 108 4 0 914  
1021 1236 1343 4e-41 178  
gi|33347862|gb|AF411835.1| scaffold11083 95.79 95 4 0 976  
1070 1 95 7e-34 154  
gi|33347862|gb|AF411835.1| scaffold11083 92.52 107 6 1 966  
1070 1343 1237 2e-33 152

gi|33347862|gb|AF411835.1| scaffold11083 91.75 97 6 1 915  
1011 95 1 9e-28 134  
gi|33347862|gb|AF411835.1| scaffold6522 95.38 130 6 0 915  
1044 4735 4606 5e-50 207  
gi|33347862|gb|AF411835.1| scaffold6522 92.31 130 8 1 943  
1070 4606 4735 9e-43 183  
gi|33347862|gb|AF411835.1| scaffold5806 94.74 133 7 0 915  
1047 107207 107075 5e-50 207  
gi|33347862|gb|AF411835.1| scaffold5806 91.54 130 9 1 943  
1070 107078 107207 4e-41 178  
gi|33347862|gb|AF411835.1| scaffold723 96.06 127 5 0 915  
1041 381369 381495 5e-50 207  
gi|33347862|gb|AF411835.1| scaffold723 91.34 127 9 1 946  
1070 381495 381369 2e-39 172  
212  
gi|33347862|gb|AF411835.1| scaffold116070 95.38 130 5 1 942  
1070 447 576 2e-49 206  
gi|33347862|gb|AF411835.1| scaffold116070 87.97 158 12 6 915  
1071 576 425 1e-41 180  
gi|33347862|gb|AF411835.1| scaffold8627 90.38 156 15 0 915  
1070 70668 70513 2e-49 206  
gi|33347862|gb|AF411835.1| scaffold3087 95.35 129 6 0 943  
1071 166841 166969 2e-49 206  
gi|33347862|gb|AF411835.1| scaffold3087 90.08 131 11 2 915  
1045 166968 166840 2e-38 169  
gi|33347862|gb|AF411835.1| scaffold3963 89.87 158 16 0 914  
1071 57613 57456 7e-49 204  
gi|33347862|gb|AF411835.1| scaffold3963 83.54 158 22 2 915  
1070 57457 57612 4e-31 145  
gi|33347862|gb|AF411835.1| scaffold58775 95.97 124 5 0 915  
1038 726 849 2e-48 202  
gi|33347862|gb|AF411835.1| scaffold58775 91.13 124 9 1 949  
1070 849 726 9e-38 167  
gi|33347862|gb|AF411835.1| scaffold4660 94.03 134 7 1 938  
1070 4223 4090 2e-48 202  
gi|33347862|gb|AF411835.1| scaffold4660 95.33 107 4 1 943  
1048 4116 4222 2e-38 169  
gi|33347862|gb|AF411835.1| scaffold4660 88.46 78 9 0 994  
1071 107015 107092 4e-16 95.3  
gi|33347862|gb|AF411835.1| scaffold4660 95.92 49 2 0 943  
991 107065 107017 1e-11 80.5  
gi|33347862|gb|AF411835.1| scaffold2513 90.32 155 14 1 917  
1071 207317 207164 2e-48 202  
gi|33347862|gb|AF411835.1| scaffold49839 90.00 160 9 5 915  
1071 895 1050 9e-48 200  
gi|33347862|gb|AF411835.1| scaffold1880 90.45 157 7 2 914

1070 86887 87035 9e-48 200  
gi|33347862|gb|AF411835.1| scaffold1880 82.28 158 16 5 915  
1070 87035 86888 2e-25 126  
gi|33347862|gb|AF411835.1| scaffold232157 95.20 125 6 0 917  
1041 125 1 3e-47 198  
gi|33347862|gb|AF411835.1| scaffold232157 91.27 126 7 3 946  
1068 1 125 2e-38 169  
gi|33347862|gb|AF411835.1| scaffold7256 89.17 157 16 1 915  
1070 90607 90763 4e-46 195  
gi|33347862|gb|AF411835.1| scaffold7256 87.12 132 14 2 943  
1071 90737 90606 1e-31 147  
gi|33347862|gb|AF411835.1| scaffold17666 94.40 125 7 0 943  
1067 9186 9062 1e-45 193  
gi|33347862|gb|AF411835.1| scaffold2062 95.04 121 6 0 950  
1070 247044 247164 5e-45 191  
gi|33347862|gb|AF411835.1| scaffold2062 89.43 123 11 2 915  
1037 247164 247044 7e-34 154  
gi|33347862|gb|AF411835.1| scaffold2062 94.25 87 4 1 910  
995 247644 247730 3e-27 132  
gi|33347862|gb|AF411835.1| scaffold2062 90.59 85 6 1 993  
1075 247729 247645 4e-21 111  
213  
gi|33347862|gb|AF411835.1| scaffold385 98.17 109 2 0 962  
1070 434752 434860 5e-45 191  
gi|33347862|gb|AF411835.1| scaffold385 93.69 111 5 2 915  
1025 434860 434752 3e-37 165  
gi|33347862|gb|AF411835.1| scaffold19702 95.73 117 5 0 954  
1070 3178 3062 2e-44 189  
gi|33347862|gb|AF411835.1| scaffold19702 90.00 120 10 2 914  
1033 3061 3178 7e-34 154  
gi|33347862|gb|AF411835.1| scaffold13824 94.96 119 6 0 953  
1071 24627 24509 7e-44 187  
gi|33347862|gb|AF411835.1| scaffold13824 95.65 115 5 0 915  
1029 24741 24627 2e-43 185  
gi|33347862|gb|AF411835.1| scaffold13824 90.00 120 10 2 915  
1034 24510 24627 7e-34 154  
gi|33347862|gb|AF411835.1| scaffold13824 90.52 116 9 1 958  
1071 24627 24742 2e-33 152  
gi|33347862|gb|AF411835.1| scaffold1636 91.85 135 10 1 914  
1047 142017 142151 7e-44 187  
gi|33347862|gb|AF411835.1| scaffold1636 90.84 131 9 1 943  
1070 142148 142018 2e-39 172  
gi|33347862|gb|AF411835.1| scaffold1559 94.96 119 6 0 952  
1070 127363 127245 7e-44 187  
gi|33347862|gb|AF411835.1| scaffold4306 98.11 106 2 0 914  
1019 39290 39395 2e-43 185

gi|33347862|gb|AF411835.1| scaffold4306 89.91 109 8 2 968  
1073 39395 39287 7e-29 137  
gi|33347862|gb|AF411835.1| scaffold1633 98.10 105 0 2 967  
1069 376053 376157 3e-42 182  
gi|33347862|gb|AF411835.1| scaffold1633 90.09 111 6 4 913  
1020 376161 376053 2e-29 139  
gi|33347862|gb|AF411835.1| scaffold1095963 100.00 97 0 0  
912 1008 97 1 1e-41 180  
gi|33347862|gb|AF411835.1| scaffold1095963 91.49 94 6 1 979  
1070 1 94 4e-26 128  
gi|33347862|gb|AF411835.1| scaffold545168 100.00 97 0 0  
975 1071 190 94 1e-41 180  
gi|33347862|gb|AF411835.1| scaffold545168 91.84 98 6 1 915  
1012 95 190 3e-28 135  
gi|33347862|gb|AF411835.1| scaffold533745 100.00 97 0 0  
944 1040 1 97 1e-41 180  
gi|33347862|gb|AF411835.1| scaffold533745 97.94 97 2 0 947  
1043 97 1 2e-38 169  
gi|33347862|gb|AF411835.1| scaffold6436 87.42 159 16 2 915  
1071 67044 67200 1e-41 180  
gi|33347862|gb|AF411835.1| scaffold2826 100.00 97 0 0  
974 1070 21778 21874 1e-41 180  
gi|33347862|gb|AF411835.1| scaffold2826 91.92 99 6 1 915  
1013 21874 21778 7e-29 137  
gi|33347862|gb|AF411835.1| scaffold2289 95.54 112 5 0 940  
1051 50132 50243 1e-41 180  
gi|33347862|gb|AF411835.1| scaffold2289 94.12 102 6 0 943  
1044 50236 50135 2e-34 156  
214  
gi|33347862|gb|AF411835.1| scaffold215317 100.00 96 0 0  
976 1071 1 96 4e-41 178  
gi|33347862|gb|AF411835.1| scaffold215317 91.75 97 6 1 915  
1011 95 1 9e-28 134  
gi|33347862|gb|AF411835.1| scaffold21216 100.00 96 0 0  
915 1010 96 1 4e-41 178  
gi|33347862|gb|AF411835.1| scaffold21216 91.75 97 6 1 977  
1071 1 97 9e-28 134  
gi|33347862|gb|AF411835.1| scaffold7648 97.14 105 3 0 915  
1019 6142 6246 4e-41 178  
gi|33347862|gb|AF411835.1| scaffold7648 89.52 105 9 1 968  
1070 6246 6142 3e-27 132  
gi|33347862|gb|AF411835.1| scaffold3968 97.14 105 3 0 915  
1019 145145 145249 4e-41 178  
gi|33347862|gb|AF411835.1| scaffold3968 89.52 105 9 1 968  
1070 145249 145145 3e-27 132  
gi|33347862|gb|AF411835.1| scaffold370516 100.00 95 0 0



976 1070 1 95 1e-40 176  
gi|33347862|gb|AF411835.1| scaffold370516 91.75 97 6 1 915  
1011 95 1 9e-28 134  
gi|33347862|gb|AF411835.1| scaffold1165713 95.45 110 5 0 962  
1071 1 110 1e-40 176  
gi|33347862|gb|AF411835.1| scaffold1165713 90.09 111 9 2 915  
1025 109 1 1e-30 143  
gi|33347862|gb|AF411835.1| scaffold8406 92.62 122 9 0 949  
1070 58887 58766 1e-40 176  
gi|33347862|gb|AF411835.1| scaffold8406 91.20 125 9 1 914  
1038 58765 58887 2e-38 169  
gi|33347862|gb|AF411835.1| scaffold2570643 98.02 101 0 2 550  
648 101 1 5e-40 174  
gi|33347862|gb|AF411835.1| scaffold12710 98.97 97 1 0 915  
1011 15357 15453 5e-40 174  
gi|33347862|gb|AF411835.1| scaffold12710 91.75 97 6 1 976  
1070 15453 15357 9e-28 134  
gi|33347862|gb|AF411835.1| scaffold2957 98.97 97 1 0 914  
1010 95949 96045 5e-40 174  
gi|33347862|gb|AF411835.1| scaffold2957 90.62 96 7 1 977  
1070 96045 95950 2e-25 126  
gi|33347862|gb|AF411835.1| scaffold178577 91.94 124 9 1 908  
1030 190 313 2e-39 172  
gi|33347862|gb|AF411835.1| scaffold539432 98.96 96 1 0 914  
1009 95 190 2e-39 172  
gi|33347862|gb|AF411835.1| scaffold539432 90.53 95 7 1 978  
1070 190 96 5e-25 124  
gi|33347862|gb|AF411835.1| scaffold181579 97.06 102 3 0 913  
1014 344 445 2e-39 172  
gi|33347862|gb|AF411835.1| scaffold181579 93.00 100 5 1 973  
1070 445 346 4e-31 145  
gi|33347862|gb|AF411835.1| scaffold40276 95.37 108 5 0 915  
1022 234 127 2e-39 172  
gi|33347862|gb|AF411835.1| scaffold36252 91.94 124 9 1 908  
1030 186 309 2e-39 172  
215  
gi|33347862|gb|AF411835.1| scaffold5591 100.00 93 0 0  
915 1007 5231 5139 2e-39 172  
gi|33347862|gb|AF411835.1| scaffold5591 91.40 93 6 1 980  
1070 5139 5231 2e-25 126  
gi|33347862|gb|AF411835.1| scaffold4115 97.98 99 2 0 913  
1011 99 1 2e-39 172  
gi|33347862|gb|AF411835.1| scaffold4115 89.69 97 8 1 976  
1070 1 97 2e-24 122  
gi|33347862|gb|AF411835.1| scaffold315966 96.15 104 4 0 917  
1020 92 195 7e-39 171

gi|33347862|gb|AF411835.1| scaffold315966 90.38 104 8 1 967  
1068 195 92 3e-28 135  
gi|33347862|gb|AF411835.1| scaffold6373 98.95 95 1 0 915  
1009 95 1 7e-39 171  
gi|33347862|gb|AF411835.1| scaffold6373 90.53 95 7 1 978  
1070 1 95 5e-25 124  
gi|33347862|gb|AF411835.1| scaffold533017 97.94 97 2 0 914  
1010 97 1 2e-38 169  
gi|33347862|gb|AF411835.1| scaffold533017 91.67 96 6 1 977  
1070 1 96 3e-27 132  
gi|33347862|gb|AF411835.1| scaffold174836 97.94 97 2 0 915  
1011 671 767 2e-38 169  
gi|33347862|gb|AF411835.1| scaffold174836 91.75 97 6 1 976  
1070 767 671 9e-28 134  
gi|33347862|gb|AF411835.1| scaffold522796 97.92 96 2 0 915  
1010 96 1 9e-38 167  
gi|33347862|gb|AF411835.1| scaffold522796 91.67 96 6 1 977  
1070 1 96 3e-27 132  
gi|33347862|gb|AF411835.1| scaffold79490 96.97 99 3 0 951  
1049 971 873 9e-38 167  
gi|33347862|gb|AF411835.1| scaffold79490 93.88 98 6 0 939  
1036 874 971 3e-32 148  
gi|33347862|gb|AF411835.1| scaffold14384 96.12 103 3 1 943  
1044 24543 24645 9e-38 167  
gi|33347862|gb|AF411835.1| scaffold14384 94.17 103 5 1 943  
1044 24645 24543 2e-34 156  
gi|33347862|gb|AF411835.1| scaffold7248 98.92 93 1 0 915  
1007 42332 42240 9e-38 167  
gi|33347862|gb|AF411835.1| scaffold7248 92.47 93 5 1 980  
1070 42240 42332 3e-27 132  
gi|33347862|gb|AF411835.1| scaffold517651 96.94 98 3 0 914  
1011 98 1 3e-37 165  
gi|33347862|gb|AF411835.1| scaffold517651 90.72 97 7 1 976  
1070 1 97 4e-26 128  
gi|33347862|gb|AF411835.1| scaffold250409 98.91 92 1 0 915  
1006 112 203 3e-37 165  
gi|33347862|gb|AF411835.1| scaffold250409 90.22 92 7 1 981 1070 203 112 3e-23 119  
gi|33347862|gb|AF411835.1| scaffold126988 97.89 95 2 0 915 1009 756 662 3e-37 165  
gi|33347862|gb|AF411835.1| scaffold126988 91.58 95 6 1 978 1070 662 756 1e-26 130  
216  
gi|33347862|gb|AF411835.1| scaffold7287 98.91 92 1 0 979 1070 93081 92990 3e-37  
165  
gi|33347862|gb|AF411835.1| scaffold7287 90.43 94 7 1 915 1008 92990 93081 2e-24  
122  
gi|33347862|gb|AF411835.1| scaffold7287 100.00 55 0 0 912 966 93787 93733 3e-18  
102

BLASTN 2.2.28+

Query: CSA3-virus-only

Fields: query id, subject id, % identity, alignment length, mismatches, gap opens, q. start, q. end, s. start, s. end, evalue, bit score

9 hits found

CSA3 scaffold14636 100.00 1038 0 0 1 1038 23437 24474 0.0 1917  
CSA3 scaffold14636 98.25 57 0 1 1 56 13149 13205 3e-18 99.0  
CSA3 scaffold1863 100.00 53 0 0 1 53 45338 45286 3e-18 99.0  
CSA3 scaffold1762 100.00 52 0 0 1 52 41423 41474 1e-17 97.1  
CSA3 scaffold1762 100.00 52 0 0 1 52 51837 51888 1e-17 97.1  
CSA3 scaffold4278 96.49 57 1 1 1 56 150991 151047 1e-16 93.5  
CSA3 scaffold4062 98.08 52 1 0 1 52 92367 92418 5e-16 91.6  
CSA3 scaffold124230 100.00 41 0 0 998 1038 576 616 1e-11 76.8  
CSA3 scaffold150541 100.00 39 0 0 1 39 707 669 2e-10 73.1

BLASTN 2.2.28+

Query: CSA2-virusonly

Fields: query id, subject id, % identity, alignment length, mismatches, gap opens, q. start, q. end, s. start, s. end, evalue, bit score

9 hits found

CSA2 scaffold14636 100.00 1038 0 0 1 1038 23437 24474 0.0 1917  
CSA2 scaffold14636 98.25 57 0 1 1 56 13149 13205 3e-18 99.0  
CSA2 scaffold1863 100.00 53 0 0 1 53 45338 45286 3e-18 99.0  
CSA2 scaffold1762 100.00 52 0 0 1 52 41423 41474 1e-17 97.1  
CSA2 scaffold1762 100.00 52 0 0 1 52 51837 51888 1e-17 97.1  
CSA2 scaffold4278 96.49 57 1 1 1 56 150991 151047 1e-16 93.5  
CSA2 scaffold4062 98.08 52 1 0 1 52 92367 92418 5e-16 91.6  
CSA2 scaffold124230 100.00 41 0 0 998 1038 576 616 1e-11 76.8  
CSA2 scaffold150541 100.00 39 0 0 1 39 707 669 2e-10 73.1

BLASTN 2.2.28+

Query: CSA1-virusonly

Fields: query id, subject id, % identity, alignment length, mismatches, gap opens, q. start, q. end, s. start, s. end, evalue, bit score

9 hits found

CSA1 scaffold14636 100.00 1038 0 0 1 1038 23437 24474 0.0 1917  
CSA1 scaffold14636 98.25 57 0 1 1 56 13149 13205 3e-18 99.0  
CSA1 scaffold1863 100.00 53 0 0 1 53 45338 45286 3e-18 99.0  
CSA1 scaffold1762 100.00 52 0 0 1 52 41423 41474 1e-17 97.1  
CSA1 scaffold1762 100.00 52 0 0 1 52 51837 51888 1e-17 97.1  
CSA1 scaffold4278 96.49 57 1 1 1 56 150991 151047 1e-16 93.5  
CSA1 scaffold4062 98.08 52 1 0 1 52 92367 92418 5e-16 91.6  
CSA1 scaffold124230 100.00 41 0 0 998 1038 576 616 1e-11 76.8  
CSA1 scaffold150541 100.00 39 0 0 1 39 707 669 2e-10 73.1

BLASTN 2.2.28+

Query: CSA4-virus sonly

Fields: query id, subject id, % identity, alignment length, mismatches, gap opens, q. start,

q. end, s. start, s. end, evaluate, bit score

9 hits found

CSA4 scaffold14636 100.00 1038 0 0 1 1038 23437 24474 0.0 1917  
CSA4 scaffold14636 98.25 57 0 1 1 56 13149 13205 3e-18 99.0  
CSA4 scaffold1863 100.00 53 0 0 1 53 45338 45286 3e-18 99.0  
CSA4 scaffold1762 100.00 52 0 0 1 52 41423 41474 1e-17 97.1  
CSA4 scaffold1762 100.00 52 0 0 1 52 51837 51888 1e-17 97.1  
CSA4 scaffold4278 96.49 57 1 1 1 56 150991 151047 1e-16 93.5  
CSA4 scaffold4062 98.08 52 1 0 1 52 92367 92418 5e-16 91.6  
CSA4 scaffold124230 100.00 41 0 0 998 1038 576 616 1e-11 76.8  
CSA4 scaffold150541 100.00 39 0 0 1 39 707 669 2e-10 73.1

BLASTN 2.2.28+

Query: gi|37993680|gb|AY347953.1| *Aedes aegypti* A20 sequence containing region similar to NS5 gene of Kamiti River virus

0 hits found

BLASTN 2.2.28+

Query: gi|335355336|gb|JF707856.1| Flavivirus AV-2011/Spain strain HU973\_04 NS5 protein-like gene, partial sequence

0 hits found

BLASTN 2.2.28+

Query: gi|335355337|gb|JF707857.1| Flavivirus AV-2011/Spain strain HU974\_04 NS5 protein-like gene, partial sequence

0 hits found

BLASTN 2.2.28+

Query: gi|335355338|gb|JF707858.1| Flavivirus AV-2011/Spain strain HU2316\_06 NS5 protein-like gene, partial sequence

0 hits found

BLASTN 2.2.28+

Query: gi|335355339|gb|JF707859.1| Flavivirus AV-2011/Spain strain GI102\_01 NS5 protein-like gene, partial sequence

0 hits found

BLASTN 2.2.28+

Query: gi|335355340|gb|JF707860.1| Flavivirus AV-2011/Spain strain GI6\_01 NS5 protein-like gene, partial sequence

0 hits found

BLASTN 2.2.28+

Query: gi|667796634|gb|KF801604.1| Mosquito flavivirus strain Av1106-TO/ITA/2012 nonfunctional NS5 protein gene, partial sequence

0 hits found

BLASTN 2.2.28+

Query: gi|667796629|gb|KF801601.1| Mosquito flavivirus strain Av1014-VC/ITA/2012 nonfunctional NS5 protein gene, partial sequence

0 hits found

BLASTN 2.2.28+

Query: gi|667796609|gb|KF801590.1| Mosquito flavivirus strain Av569-VC/ITA/2012 nonfunctional NS5 protein gene, partial sequence

0 hits found

BLASTN 2.2.28+

Query: gi|667796637|gb|KF801606.1| Mosquito flavivirus strain Av1116-CN/ITA/2012 nonfunctional NS5 protein gene, partial sequence

0 hits found

BLASTN 2.2.28+

Query: gi|667796622|gb|KF801597.1| Mosquito flavivirus strain Av710-VC/ITA/2012 nonfunctional NS5 protein gene, partial sequence

0 hits found

BLASTN 2.2.28+

Query: gi|667796630|gb|KF801602.1| Mosquito flavivirus strain Av1020-TO/ITA/2012 NS5 protein gene, partial cds

0 hits found

BLASTN 2.2.28+

Query: gi|667796638|gb|KF801607.1| Mosquito flavivirus strain Av1228-VC/ITA/2012 NS5 protein gene, partial cds

0 hits found
