# Supplementary material
Source: PubMed Central journal article supplement (PMC4640774)
Supplement: pnas.1516410112.sd04.pdf [file pnas.1516410112.sd04.pdf]

**Table S3.3. Output of blast analyses of the *Aedes aegypti* genome, AaegL3 assembly.**

```
# BLASTN 2.2.28+
# Query: gi|544185967|dbj|AB813812.1| Cell fusing agent virus NS5 gene
for non-structural protein 5, partial cds, strain: NS5-312_08
# Database: /Volumes/Seagate_Exp_2/aedes_aegypti/blast_dbps/AaLVPC
# Fields: query id, subject id, % identity, alignment length,
mismatches, gap opens, q. start, q. end, s. start, s. end, evalue, bit
score
# 1 hits found
gi|544185967|dbj|AB813812.1|      AAGE02006399.1  93.01 186   13   0
    1090 1275 6246 6061 3e-70 272
# BLASTN 2.2.28+
# Query: gi|544185965|dbj|AB813811.1| Cell fusing agent virus NS5 gene
for non-structural protein 5, partial cds, strain: NS5-311_08
# Database: /Volumes/Seagate_Exp_2/aedes_aegypti/blast_dbps/AaLVPC
# Fields: query id, subject id, % identity, alignment length,
mismatches, gap opens, q. start, q. end, s. start, s. end, evalue, bit
score
# 1 hits found
gi|544185965|dbj|AB813811.1|      AAGE02006399.1  93.01 186   13   0
    1090 1275 6246 6061 3e-70 272
# BLASTN 2.2.28+
# Query: gi|544185963|dbj|AB813810.1| Cell fusing agent virus NS5 gene
for non-structural protein 5, partial cds, strain: NS5-233_08
# Database: /Volumes/Seagate_Exp_2/aedes_aegypti/blast_dbps/AaLVPC
# Fields: query id, subject id, % identity, alignment length,
mismatches, gap opens, q. start, q. end, s. start, s. end, evalue, bit
score
# 1 hits found
gi|544185963|dbj|AB813810.1|      AAGE02006399.1  94.05 185   11   0
    1090 1274 6246 6062 5e-73 281
# BLASTN 2.2.28+
# Query: gi|544185961|dbj|AB813809.1| Cell fusing agent virus NS5 gene
for non-structural protein 5, partial cds, strain: NS5-227_08
# Database: /Volumes/Seagate_Exp_2/aedes_aegypti/blast_dbps/AaLVPC
# Fields: query id, subject id, % identity, alignment length,
mismatches, gap opens, q. start, q. end, s. start, s. end, evalue, bit
score
# 1 hits found
gi|544185961|dbj|AB813809.1|      AAGE02006399.1  94.05 185   11   0
    1090 1274 6246 6062 5e-73 281
# BLASTN 2.2.28+
# Query: gi|544185959|dbj|AB813808.1| Cell fusing agent virus NS5 gene
for non-structural protein 5, partial cds, strain: NS5-175_08
# Database: /Volumes/Seagate_Exp_2/aedes_aegypti/blast_dbps/AaLVPC
# Fields: query id, subject id, % identity, alignment length,
mismatches, gap opens, q. start, q. end, s. start, s. end, evalue, bit
score
# 1 hits found
```

```

gi|544185959|dbj|AB813808.1|      AAGE02006399.1  94.09 186   11   0
    1090 1275 6246 6061 1e-73 283
# BLASTN 2.2.28+
# Query: gi|544185957|dbj|AB813807.1| Cell fusing agent virus NS5 gene
for non-structural protein 5, partial cds, strain: NS5-174_08
# Database: /Volumes/Seagate_Exp_2/aedes_aegypti/blast_dbps/AaLVPC
# Fields: query id, subject id, % identity, alignment length,
mismatches, gap opens, q. start, q. end, s. start, s. end, evalue, bit
score
# 1 hits found
gi|544185957|dbj|AB813807.1|      AAGE02006399.1  94.05 185   11   0
    1090 1274 6246 6062 5e-73 281
# BLASTN 2.2.28+
# Query: gi|544185955|dbj|AB813806.1| Cell fusing agent virus NS5 gene
for non-structural protein 5, partial cds, strain: NS5-173_08
# Database: /Volumes/Seagate_Exp_2/aedes_aegypti/blast_dbps/AaLVPC
# Fields: query id, subject id, % identity, alignment length,
mismatches, gap opens, q. start, q. end, s. start, s. end, evalue, bit
score
# 1 hits found
gi|544185955|dbj|AB813806.1|      AAGE02006399.1  94.05 185   11   0
    1090 1274 6246 6062 5e-73 281
# BLASTN 2.2.28+
# Query: gi|544185953|dbj|AB813805.1| Cell fusing agent virus NS5 gene
for non-structural protein 5, partial cds, strain: NS5-163_08
# Database: /Volumes/Seagate_Exp_2/aedes_aegypti/blast_dbps/AaLVPC
# Fields: query id, subject id, % identity, alignment length,
mismatches, gap opens, q. start, q. end, s. start, s. end, evalue, bit
score
# 1 hits found
gi|544185953|dbj|AB813805.1|      AAGE02006399.1  95.16 186    9   0
    1090 1275 6246 6061 6e-77 294
# BLASTN 2.2.28+
# Query: gi|544185951|dbj|AB813804.1| Cell fusing agent virus NS5 gene
for non-structural protein 5, partial cds, strain: NS5-158_08
# Database: /Volumes/Seagate_Exp_2/aedes_aegypti/blast_dbps/AaLVPC
# Fields: query id, subject id, % identity, alignment length,
mismatches, gap opens, q. start, q. end, s. start, s. end, evalue, bit
score
# 1 hits found
gi|544185951|dbj|AB813804.1|      AAGE02006399.1  94.05 185   11   0
    1090 1274 6246 6062 5e-73 281
# BLASTN 2.2.28+
# Query: gi|544185949|dbj|AB813803.1| Cell fusing agent virus NS5 gene
for non-structural protein 5, partial cds, strain: NS5-147_08
# Database: /Volumes/Seagate_Exp_2/aedes_aegypti/blast_dbps/AaLVPC
# Fields: query id, subject id, % identity, alignment length,
mismatches, gap opens, q. start, q. end, s. start, s. end, evalue, bit
score
# 1 hits found
gi|544185949|dbj|AB813803.1|      AAGE02006399.1  94.05 185   11   0
    1090 1274 6246 6062 5e-73 281

```

```

# BLASTN 2.2.28+
# Query: gi|544185947|dbj|AB813802.1| Cell fusing agent virus NS5 gene
for non-structural protein 5, partial cds, strain: NS5-141_08
# Database: /Volumes/Seagate_Exp_2/aedes_aegypti/blast_dbps/AaLVPC
# Fields: query id, subject id, % identity, alignment length,
mismatches, gap opens, q. start, q. end, s. start, s. end, evaluate, bit
score
# 1 hits found
gi|544185947|dbj|AB813802.1|      AAGE02006399.1  90.86 186   17   0
    1090 1275 6246 6061 1e-63 250
# BLASTN 2.2.28+
# Query: gi|544185945|dbj|AB813801.1| Cell fusing agent virus NS5 gene
for non-structural protein 5, partial cds, strain: NS5-60_12
# Database: /Volumes/Seagate_Exp_2/aedes_aegypti/blast_dbps/AaLVPC
# Fields: query id, subject id, % identity, alignment length,
mismatches, gap opens, q. start, q. end, s. start, s. end, evaluate, bit
score
# 1 hits found
gi|544185945|dbj|AB813801.1|      AAGE02006399.1  94.54 183   10   0
    1093 1275 6243 6061 1e-73 283
# BLASTN 2.2.28+
# Query: gi|544185943|dbj|AB813800.1| Cell fusing agent virus NS5 gene
for non-structural protein 5, partial cds, strain: NS5-55_12
# Database: /Volumes/Seagate_Exp_2/aedes_aegypti/blast_dbps/AaLVPC
# Fields: query id, subject id, % identity, alignment length,
mismatches, gap opens, q. start, q. end, s. start, s. end, evaluate, bit
score
# 1 hits found
gi|544185943|dbj|AB813800.1|      AAGE02006399.1  95.16 186    9   0
    1090 1275 6246 6061 6e-77 294
# BLASTN 2.2.28+
# Query: gi|544185941|dbj|AB813799.1| Cell fusing agent virus NS5 gene
for non-structural protein 5, partial cds, strain: NS5-52_12
# Database: /Volumes/Seagate_Exp_2/aedes_aegypti/blast_dbps/AaLVPC
# Fields: query id, subject id, % identity, alignment length,
mismatches, gap opens, q. start, q. end, s. start, s. end, evaluate, bit
score
# 1 hits found
gi|544185941|dbj|AB813799.1|      AAGE02006399.1  92.47 186   14   0
    1090 1275 6246 6061 1e-68 267
# BLASTN 2.2.28+
# Query: gi|544185939|dbj|AB813798.1| Cell fusing agent virus NS5 gene
for non-structural protein 5, partial cds, strain: NS5-50_12
# Database: /Volumes/Seagate_Exp_2/aedes_aegypti/blast_dbps/AaLVPC
# Fields: query id, subject id, % identity, alignment length,
mismatches, gap opens, q. start, q. end, s. start, s. end, evaluate, bit
score
# 1 hits found
gi|544185939|dbj|AB813798.1|      AAGE02006399.1  94.54 183   10   0
    1093 1275 6243 6061 1e-73 283
# BLASTN 2.2.28+

```

```

# Query: gi|544185937|dbj|AB813797.1| Cell fusing agent virus NS5 gene
for non-structural protein 5, partial cds, strain: NS5-50_08
# Database: /Volumes/Seagate_Exp_2/aedes_aegypti/blast_dbps/AaLVPC
# Fields: query id, subject id, % identity, alignment length,
mismatches, gap opens, q. start, q. end, s. start, s. end, evaluate, bit
score
# 1 hits found
gi|544185937|dbj|AB813797.1|      AAGE02006399.1  90.86 186   17   0
    1090 1275 6246 6061 1e-63 250
# BLASTN 2.2.28+
# Query: gi|544185935|dbj|AB813796.1| Cell fusing agent virus NS5 gene
for non-structural protein 5, partial cds, strain: NS5-48_12
# Database: /Volumes/Seagate_Exp_2/aedes_aegypti/blast_dbps/AaLVPC
# Fields: query id, subject id, % identity, alignment length,
mismatches, gap opens, q. start, q. end, s. start, s. end, evaluate, bit
score
# 1 hits found
gi|544185935|dbj|AB813796.1|      AAGE02006399.1  94.54 183   10   0
    1093 1275 6243 6061 1e-73 283
# BLASTN 2.2.28+
# Query: gi|544185933|dbj|AB813795.1| Cell fusing agent virus NS5 gene
for non-structural protein 5, partial cds, strain: NS5-46_12
# Database: /Volumes/Seagate_Exp_2/aedes_aegypti/blast_dbps/AaLVPC
# Fields: query id, subject id, % identity, alignment length,
mismatches, gap opens, q. start, q. end, s. start, s. end, evaluate, bit
score
# 1 hits found
gi|544185933|dbj|AB813795.1|      AAGE02006399.1  94.62 186   10   0
    1090 1275 6246 6061 3e-75 289
# BLASTN 2.2.28+
# Query: gi|544185931|dbj|AB813794.1| Cell fusing agent virus NS5 gene
for non-structural protein 5, partial cds, strain: NS5-45_12
# Database: /Volumes/Seagate_Exp_2/aedes_aegypti/blast_dbps/AaLVPC
# Fields: query id, subject id, % identity, alignment length,
mismatches, gap opens, q. start, q. end, s. start, s. end, evaluate, bit
score
# 1 hits found
gi|544185931|dbj|AB813794.1|      AAGE02006399.1  94.54 183   10   0
    1093 1275 6243 6061 1e-73 283
# BLASTN 2.2.28+
# Query: gi|544185929|dbj|AB813793.1| Cell fusing agent virus NS5 gene
for non-structural protein 5, partial cds, strain: NS5-44_12
# Database: /Volumes/Seagate_Exp_2/aedes_aegypti/blast_dbps/AaLVPC
# Fields: query id, subject id, % identity, alignment length,
mismatches, gap opens, q. start, q. end, s. start, s. end, evaluate, bit
score
# 1 hits found
gi|544185929|dbj|AB813793.1|      AAGE02006399.1  94.54 183   10   0
    1093 1275 6243 6061 1e-73 283
# BLASTN 2.2.28+
# Query: gi|544185927|dbj|AB813792.1| Cell fusing agent virus NS5 gene
for non-structural protein 5, partial cds, strain: NS5-43_12

```

```

# Database: /Volumes/Seagate_Exp_2/aedes_aegypti/blast_dbps/AaLVPC
# Fields: query id, subject id, % identity, alignment length,
mismatches, gap opens, q. start, q. end, s. start, s. end, evaluate, bit
score
# 1 hits found
gi|544185927|dbj|AB813792.1|      AAGE02006399.1  94.54 183   10    0
      1093 1275 6243 6061 1e-73 283
# BLASTN 2.2.28+
# Query: gi|544185925|dbj|AB813791.1| Cell fusing agent virus NS5 gene
for non-structural protein 5, partial cds, strain: NS5-42_08
# Database: /Volumes/Seagate_Exp_2/aedes_aegypti/blast_dbps/AaLVPC
# Fields: query id, subject id, % identity, alignment length,
mismatches, gap opens, q. start, q. end, s. start, s. end, evaluate, bit
score
# 1 hits found
gi|544185925|dbj|AB813791.1|      AAGE02006399.1  94.62 186   10    0
      1090 1275 6246 6061 3e-75 289
# BLASTN 2.2.28+
# Query: gi|544185923|dbj|AB813790.1| Cell fusing agent virus NS5 gene
for non-structural protein 5, partial cds, strain: NS5-23_12
# Database: /Volumes/Seagate_Exp_2/aedes_aegypti/blast_dbps/AaLVPC
# Fields: query id, subject id, % identity, alignment length,
mismatches, gap opens, q. start, q. end, s. start, s. end, evaluate, bit
score
# 1 hits found
gi|544185923|dbj|AB813790.1|      AAGE02006399.1  94.54 183   10    0
      1093 1275 6243 6061 1e-73 283
# BLASTN 2.2.28+
# Query: gi|544185921|dbj|AB813789.1| Cell fusing agent virus NS5 gene
for non-structural protein 5, partial cds, strain: NS5-17_12
# Database: /Volumes/Seagate_Exp_2/aedes_aegypti/blast_dbps/AaLVPC
# Fields: query id, subject id, % identity, alignment length,
mismatches, gap opens, q. start, q. end, s. start, s. end, evaluate, bit
score
# 1 hits found
gi|544185921|dbj|AB813789.1|      AAGE02006399.1  95.16 186    9    0
      1090 1275 6246 6061 6e-77 294
# BLASTN 2.2.28+
# Query: gi|544185919|dbj|AB813788.1| Cell fusing agent virus NS5 gene
for non-structural protein 5, partial cds, strain: NS5-16_12
# Database: /Volumes/Seagate_Exp_2/aedes_aegypti/blast_dbps/AaLVPC
# Fields: query id, subject id, % identity, alignment length,
mismatches, gap opens, q. start, q. end, s. start, s. end, evaluate, bit
score
# 1 hits found
gi|544185919|dbj|AB813788.1|      AAGE02006399.1  95.16 186    9    0
      1090 1275 6246 6061 6e-77 294
# BLASTN 2.2.28+
# Query: gi|544185917|dbj|AB813787.1| Cell fusing agent virus NS5 gene
for non-structural protein 5, partial cds, strain: NS5-15_12
# Database: /Volumes/Seagate_Exp_2/aedes_aegypti/blast_dbps/AaLVPC

```

```

# Fields: query id, subject id, % identity, alignment length,
mismatches, gap opens, q. start, q. end, s. start, s. end, evalue, bit
score
# 1 hits found
gi|544185917|dbj|AB813787.1|      AAGE02006399.1  95.16 186   9   0
      1090 1275 6246 6061 6e-77 294
# BLASTN 2.2.28+
# Query: gi|544185915|dbj|AB813786.1| Cell fusing agent virus NS5 gene
for non-structural protein 5, partial cds, strain: NS5-11_12
# Database: /Volumes/Seagate_Exp_2/aedes_aegypti/blast_dbps/AaLVPC
# Fields: query id, subject id, % identity, alignment length,
mismatches, gap opens, q. start, q. end, s. start, s. end, evalue, bit
score
# 1 hits found
gi|544185915|dbj|AB813786.1|      AAGE02006399.1  94.62 186  10   0
      1090 1275 6246 6061 3e-75 289
# BLASTN 2.2.28+
# Query: gi|544185913|dbj|AB813785.1| Cell fusing agent virus NS5 gene
for non-structural protein 5, partial cds, strain: NS5-9_12
# Database: /Volumes/Seagate_Exp_2/aedes_aegypti/blast_dbps/AaLVPC
# Fields: query id, subject id, % identity, alignment length,
mismatches, gap opens, q. start, q. end, s. start, s. end, evalue, bit
score
# 1 hits found
gi|544185913|dbj|AB813785.1|      AAGE02006399.1  94.62 186  10   0
      1090 1275 6246 6061 3e-75 289
# BLASTN 2.2.28+
# Query: gi|544185911|dbj|AB813784.1| Cell fusing agent virus NS5 gene
for non-structural protein 5, partial cds, strain: NS5-8_12
# Database: /Volumes/Seagate_Exp_2/aedes_aegypti/blast_dbps/AaLVPC
# Fields: query id, subject id, % identity, alignment length,
mismatches, gap opens, q. start, q. end, s. start, s. end, evalue, bit
score
# 1 hits found
gi|544185911|dbj|AB813784.1|      AAGE02006399.1  94.54 183  10   0
      1093 1275 6243 6061 1e-73 283
# BLASTN 2.2.28+
# Query: gi|310751810|gb|HM579916.1| Cell fusing agent virus isolate
CFAV/Colima-5 NS5 gene, partial cds
# Database: /Volumes/Seagate_Exp_2/aedes_aegypti/blast_dbps/AaLVPC
# 0 hits found
# BLASTN 2.2.28+
# Query: gi|310751808|gb|HM579915.1| Cell fusing agent virus isolate
CFAV/Colima-4 NS5 gene, partial cds
# Database: /Volumes/Seagate_Exp_2/aedes_aegypti/blast_dbps/AaLVPC
# 0 hits found
# BLASTN 2.2.28+
# Query: gi|310751806|gb|HM579914.1| Cell fusing agent virus isolate
CFAV/Colima-3 NS5 gene, partial cds
# Database: /Volumes/Seagate_Exp_2/aedes_aegypti/blast_dbps/AaLVPC
# 0 hits found
# BLASTN 2.2.28+

```

```

# Query: gi|310751804|gb|HM579913.1| Cell fusing agent virus isolate
CFAV/Colima-2 NS5 gene, partial cds
# Database: /Volumes/Seagate_Exp_2/aedes_aegypti/blast_dbps/AaLVPC
# 0 hits found
# BLASTN 2.2.28+
# Query: gi|310751802|gb|HM579912.1| Cell fusing agent virus isolate
CFAV/Colima-1 NS5 gene, partial cds
# Database: /Volumes/Seagate_Exp_2/aedes_aegypti/blast_dbps/AaLVPC
# 0 hits found
# BLASTN 2.2.28+
# Query: gi|251823483|dbj|AB488430.1| Cell fusing agent virus gene for
polyprotein (NS5 region), partial cds, strain: Surabaya-12
# Database: /Volumes/Seagate_Exp_2/aedes_aegypti/blast_dbps/AaLVPC
# 0 hits found
# BLASTN 2.2.28+
# Query: gi|251823479|dbj|AB488428.1| Cell fusing agent virus gene for
polyprotein (NS5 region), partial cds, strain: Surabaya-10
# Database: /Volumes/Seagate_Exp_2/aedes_aegypti/blast_dbps/AaLVPC
# 0 hits found
# BLASTN 2.2.28+
# Query: gi|251823471|dbj|AB488424.1| Aedes flavivirus gene for
polyprotein (NS5 region), partial cds, strain: Toyama-26
# Database: /Volumes/Seagate_Exp_2/aedes_aegypti/blast_dbps/AaLVPC
# 0 hits found
# BLASTN 2.2.28+
# Query: gi|251823463|dbj|AB488420.1| Aedes flavivirus gene for
polyprotein (NS5 region), partial cds, strain: Nagasaki-5
# Database: /Volumes/Seagate_Exp_2/aedes_aegypti/blast_dbps/AaLVPC
# 0 hits found
# BLASTN 2.2.28+
# Query: gi|251823455|dbj|AB488416.1| Aedes flavivirus gene for
polyprotein (NS5 region), partial cds, strain: Mie-16
# Database: /Volumes/Seagate_Exp_2/aedes_aegypti/blast_dbps/AaLVPC
# 0 hits found
# BLASTN 2.2.28+
# Query: gi|260534087|gb|GQ477012.1| Mosquito flavivirus isolate
AealFV7 NS5 gene, partial cds
# Database: /Volumes/Seagate_Exp_2/aedes_aegypti/blast_dbps/AaLVPC
# 0 hits found
# BLASTN 2.2.28+
# Query: gi|260534085|gb|GQ477011.1| Mosquito flavivirus isolate
AealFV5 NS5 gene, partial cds
# Database: /Volumes/Seagate_Exp_2/aedes_aegypti/blast_dbps/AaLVPC
# 0 hits found
# BLASTN 2.2.28+
# Query: gi|260534084|gb|GQ477010.1| Mosquito flavivirus isolate
AealFV9 nonfunctional NS5 gene, partial sequence
# Database: /Volumes/Seagate_Exp_2/aedes_aegypti/blast_dbps/AaLVPC
# 0 hits found
# BLASTN 2.2.28+
# Query: gi|260534083|gb|GQ477009.1| Mosquito flavivirus isolate
AealFV1 nonfunctional NS5 gene, partial sequence

```

```
# Database: /Volumes/Seagate_Exp_2/aedes_aegypti/blast_dbps/AaLVPC
# 0 hits found
# BLASTN 2.2.28+
# Query: gi|260534081|gb|GQ477008.1| Mosquito flavivirus isolate
AealFV8 NS5 gene, partial cds
# Database: /Volumes/Seagate_Exp_2/aedes_aegypti/blast_dbps/AaLVPC
# 0 hits found
# BLASTN 2.2.28+
# Query: gi|260534079|gb|GQ477007.1| Mosquito flavivirus isolate
AealFV6 NS5 gene, partial cds
# Database: /Volumes/Seagate_Exp_2/aedes_aegypti/blast_dbps/AaLVPC
# 0 hits found
# BLASTN 2.2.28+
# Query: gi|260534077|gb|GQ477006.1| Mosquito flavivirus isolate
AealFV2 NS5 gene, partial cds
# Database: /Volumes/Seagate_Exp_2/aedes_aegypti/blast_dbps/AaLVPC
# 0 hits found
# BLASTN 2.2.28+
# Query: gi|260534075|gb|GQ477005.1| Mosquito flavivirus isolate
AealFV3 NS5 gene, partial cds
# Database: /Volumes/Seagate_Exp_2/aedes_aegypti/blast_dbps/AaLVPC
# 0 hits found
# BLASTN 2.2.28+
# Query: gi|260534073|gb|GQ477004.1| Mosquito flavivirus isolate
AealFV4 NS5 gene, partial cds
# Database: /Volumes/Seagate_Exp_2/aedes_aegypti/blast_dbps/AaLVPC
# 0 hits found
# BLASTN 2.2.28+
# Query: gi|315661165|gb|HQ441865.1| Mosquito flavivirus isolate PR-Aa
NS5 gene, partial cds
# Database: /Volumes/Seagate_Exp_2/aedes_aegypti/blast_dbps/AaLVPC
# 0 hits found
# BLASTN 2.2.28+
# Query: gi|315661163|gb|HQ441864.1| Mosquito flavivirus isolate RE-
Aa5 NS5 gene, partial cds
# Database: /Volumes/Seagate_Exp_2/aedes_aegypti/blast_dbps/AaLVPC
# 0 hits found
# BLASTN 2.2.28+
# Query: gi|315661161|gb|HQ441863.1| Mosquito flavivirus isolate RE-
Aa4 NS5 gene, partial cds
# Database: /Volumes/Seagate_Exp_2/aedes_aegypti/blast_dbps/AaLVPC
# 0 hits found
# BLASTN 2.2.28+
# Query: gi|315661159|gb|HQ441862.1| Mosquito flavivirus isolate BO-
Aa6 NS5 gene, partial cds
# Database: /Volumes/Seagate_Exp_2/aedes_aegypti/blast_dbps/AaLVPC
# 0 hits found
# BLASTN 2.2.28+
# Query: gi|315661157|gb|HQ441861.1| Mosquito flavivirus isolate RE-
Ae4 NS5 gene, partial cds
# Database: /Volumes/Seagate_Exp_2/aedes_aegypti/blast_dbps/AaLVPC
# 0 hits found
```



```
# BLASTN 2.2.28+
# Query: gi|315661155|gb|HQ441860.1| Mosquito flavivirus isolate BO-
Aa5 NS5 gene, partial cds
# Database: /Volumes/Seagate_Exp_2/aedes_aegypti/blast_dbps/AaLVPC
# 0 hits found
# BLASTN 2.2.28+
# Query: gi|315661153|gb|HQ441859.1| Mosquito flavivirus isolate BO-
Aa4 NS5 gene, partial cds
# Database: /Volumes/Seagate_Exp_2/aedes_aegypti/blast_dbps/AaLVPC
# 0 hits found
# BLASTN 2.2.28+
# Query: gi|315661151|gb|HQ441858.1| Mosquito flavivirus isolate RE-
Aa3 NS5 gene, partial cds
# Database: /Volumes/Seagate_Exp_2/aedes_aegypti/blast_dbps/AaLVPC
# 0 hits found
# BLASTN 2.2.28+
# Query: gi|315661149|gb|HQ441857.1| Mosquito flavivirus isolate BO-
Aa3 NS5 gene, partial cds
# Database: /Volumes/Seagate_Exp_2/aedes_aegypti/blast_dbps/AaLVPC
# 0 hits found
# BLASTN 2.2.28+
# Query: gi|315661147|gb|HQ441856.1| Mosquito flavivirus isolate BO-
Aa2 NS5 gene, partial cds
# Database: /Volumes/Seagate_Exp_2/aedes_aegypti/blast_dbps/AaLVPC
# 0 hits found
# BLASTN 2.2.28+
# Query: gi|315661145|gb|HQ441855.1| Mosquito flavivirus isolate BO-
Aa1 NS5 gene, partial cds
# Database: /Volumes/Seagate_Exp_2/aedes_aegypti/blast_dbps/AaLVPC
# 0 hits found
# BLASTN 2.2.28+
# Query: gi|315661141|gb|HQ441853.1| Mosquito flavivirus isolate PC-
Aa2 NS5 gene, partial cds
# Database: /Volumes/Seagate_Exp_2/aedes_aegypti/blast_dbps/AaLVPC
# 0 hits found
# BLASTN 2.2.28+
# Query: gi|315661139|gb|HQ441852.1| Mosquito flavivirus isolate MO-Aa
NS5 gene, partial cds
# Database: /Volumes/Seagate_Exp_2/aedes_aegypti/blast_dbps/AaLVPC
# 0 hits found
# BLASTN 2.2.28+
# Query: gi|315661137|gb|HQ441851.1| Mosquito flavivirus isolate RE-
Aa1 NS5 gene, partial cds
# Database: /Volumes/Seagate_Exp_2/aedes_aegypti/blast_dbps/AaLVPC
# 0 hits found
# BLASTN 2.2.28+
# Query: gi|315661135|gb|HQ441850.1| Mosquito flavivirus isolate FE-
Aa4 NS5 gene, partial cds
# Database: /Volumes/Seagate_Exp_2/aedes_aegypti/blast_dbps/AaLVPC
# 0 hits found
# BLASTN 2.2.28+
```

```

# Query: gi|315661133|gb|HQ441849.1| Mosquito flavivirus isolate FE-
Aa3 NS5 gene, partial cds
# Database: /Volumes/Seagate_Exp_2/aedes_aegypti/blast_dbps/AaLVPC
# 0 hits found
# BLASTN 2.2.28+
# Query: gi|315661131|gb|HQ441848.1| Mosquito flavivirus isolate FE-
Aa2 NS5 gene, partial cds
# Database: /Volumes/Seagate_Exp_2/aedes_aegypti/blast_dbps/AaLVPC
# 0 hits found
# BLASTN 2.2.28+
# Query: gi|315661129|gb|HQ441847.1| Mosquito flavivirus isolate FE-
Aa1 NS5 gene, partial cds
# Database: /Volumes/Seagate_Exp_2/aedes_aegypti/blast_dbps/AaLVPC
# 0 hits found
# BLASTN 2.2.28+
# Query: gi|315661127|gb|HQ441846.1| Mosquito flavivirus isolate PC-
Aa1 NS5 gene, partial cds
# Database: /Volumes/Seagate_Exp_2/aedes_aegypti/blast_dbps/AaLVPC
# 0 hits found
# BLASTN 2.2.28+
# Query: gi|251823503|dbj|AB488440.1| Culex flavivirus gene for
polyprotein (NS5 region), partial cds, strain: Mie-19
# Database: /Volumes/Seagate_Exp_2/aedes_aegypti/blast_dbps/AaLVPC
# 0 hits found
# BLASTN 2.2.28+
# Query: gi|251823501|dbj|AB488439.1| Culex flavivirus gene for
polyprotein (NS5 region), partial cds, strain: Mie-1
# Database: /Volumes/Seagate_Exp_2/aedes_aegypti/blast_dbps/AaLVPC
# 0 hits found
# BLASTN 2.2.28+
# Query: gi|251823499|dbj|AB488438.1| Culex flavivirus gene for
polyprotein (NS5 region), partial cds, strain: Osaka-32
# Database: /Volumes/Seagate_Exp_2/aedes_aegypti/blast_dbps/AaLVPC
# 0 hits found
# BLASTN 2.2.28+
# Query: gi|251823497|dbj|AB488437.1| Culex flavivirus gene for
polyprotein (NS5 region), partial cds, strain: Toyama-13
# Database: /Volumes/Seagate_Exp_2/aedes_aegypti/blast_dbps/AaLVPC
# 0 hits found
# BLASTN 2.2.28+
# Query: gi|251823495|dbj|AB488436.1| Culex flavivirus gene for
polyprotein (NS5 region), partial cds, strain: Morioka-1
# Database: /Volumes/Seagate_Exp_2/aedes_aegypti/blast_dbps/AaLVPC
# 0 hits found
# BLASTN 2.2.28+
# Query: gi|251823493|dbj|AB488435.1| Culex flavivirus gene for
polyprotein (NS5 region), partial cds, strain: Hokkaido-4
# Database: /Volumes/Seagate_Exp_2/aedes_aegypti/blast_dbps/AaLVPC
# 0 hits found
# BLASTN 2.2.28+
# Query: gi|251823491|dbj|AB488434.1| Culex flavivirus gene for
polyprotein (NS5 region), partial cds, strain: Narita-1

```

```

# Database: /Volumes/Seagate_Exp_2/aedes_aegypti/blast_dbps/AaLVPC
# 0 hits found
# BLASTN 2.2.28+
# Query: gi|251823489|dbj|AB488433.1| Culex flavivirus gene for
polyprotein (NS5 region), partial cds, strain: Surabaya-2
# Database: /Volumes/Seagate_Exp_2/aedes_aegypti/blast_dbps/AaLVPC
# 0 hits found
# BLASTN 2.2.28+
# Query: gi|251823447|dbj|AB488412.1| Aedes flavivirus gene for
polyprotein (NS5 region), partial cds, strain: Narita-24
# Database: /Volumes/Seagate_Exp_2/aedes_aegypti/blast_dbps/AaLVPC
# 0 hits found
# BLASTN 2.2.28+
# Query: gi|544185909|dbj|AB813783.1| Cell fusing agent virus NS3 gene
for non-structural protein 3, partial cds, strain: NS3-312_08
# Database: /Volumes/Seagate_Exp_2/aedes_aegypti/blast_dbps/AaLVPC
# 0 hits found
# BLASTN 2.2.28+
# Query: gi|544185907|dbj|AB813782.1| Cell fusing agent virus NS3 gene
for non-structural protein 3, partial cds, strain: NS3-311_08
# Database: /Volumes/Seagate_Exp_2/aedes_aegypti/blast_dbps/AaLVPC
# 0 hits found
# BLASTN 2.2.28+
# Query: gi|544185905|dbj|AB813781.1| Cell fusing agent virus NS3 gene
for non-structural protein 3, partial cds, strain: NS3-233_08
# Database: /Volumes/Seagate_Exp_2/aedes_aegypti/blast_dbps/AaLVPC
# 0 hits found
# BLASTN 2.2.28+
# Query: gi|315661143|gb|HQ441854.1| Mosquito flavivirus isolate RE-
Aa2 NS5 gene, partial cds
# Database: /Volumes/Seagate_Exp_2/aedes_aegypti/blast_dbps/AaLVPC
# 0 hits found
# BLASTN 2.2.28+
# Query: gi|544185903|dbj|AB813780.1| Cell fusing agent virus NS3 gene
for non-structural protein 3, partial cds, strain: NS3-227_08
# Database: /Volumes/Seagate_Exp_2/aedes_aegypti/blast_dbps/AaLVPC
# 0 hits found
# BLASTN 2.2.28+
# Query: gi|544185901|dbj|AB813779.1| Cell fusing agent virus NS3 gene
for non-structural protein 3, partial cds, strain: NS3-175_08
# Database: /Volumes/Seagate_Exp_2/aedes_aegypti/blast_dbps/AaLVPC
# 0 hits found
# BLASTN 2.2.28+
# Query: gi|544185899|dbj|AB813778.1| Cell fusing agent virus NS3 gene
for non-structural protein 3, partial cds, strain: NS3-174_08
# Database: /Volumes/Seagate_Exp_2/aedes_aegypti/blast_dbps/AaLVPC
# 0 hits found
# BLASTN 2.2.28+
# Query: gi|544185897|dbj|AB813777.1| Cell fusing agent virus NS3 gene
for non-structural protein 3, partial cds, strain: NS3-173_08
# Database: /Volumes/Seagate_Exp_2/aedes_aegypti/blast_dbps/AaLVPC
# 0 hits found

```

```
# BLASTN 2.2.28+
# Query: gi|544185895|dbj|AB813776.1| Cell fusing agent virus NS3 gene
for non-structural protein 3, partial cds, strain: NS3-163_08
# Database: /Volumes/Seagate_Exp_2/aedes_aegypti/blast_dbps/AaLVPC
# 0 hits found
# BLASTN 2.2.28+
# Query: gi|544185893|dbj|AB813775.1| Cell fusing agent virus NS3 gene
for non-structural protein 3, partial cds, strain: NS3-158_08
# Database: /Volumes/Seagate_Exp_2/aedes_aegypti/blast_dbps/AaLVPC
# 0 hits found
# BLASTN 2.2.28+
# Query: gi|544185891|dbj|AB813774.1| Cell fusing agent virus NS3 gene
for non-structural protein 3, partial cds, strain: NS3-147_08
# Database: /Volumes/Seagate_Exp_2/aedes_aegypti/blast_dbps/AaLVPC
# 0 hits found
# BLASTN 2.2.28+
# Query: gi|544185889|dbj|AB813773.1| Cell fusing agent virus NS3 gene
for non-structural protein 3, partial cds, strain: NS3-141_08
# Database: /Volumes/Seagate_Exp_2/aedes_aegypti/blast_dbps/AaLVPC
# 0 hits found
# BLASTN 2.2.28+
# Query: gi|544185887|dbj|AB813772.1| Cell fusing agent virus NS3 gene
for non-structural protein 3, partial cds, strain: NS3-60_12
# Database: /Volumes/Seagate_Exp_2/aedes_aegypti/blast_dbps/AaLVPC
# 0 hits found
# BLASTN 2.2.28+
# Query: gi|544185885|dbj|AB813771.1| Cell fusing agent virus NS3 gene
for non-structural protein 3, partial cds, strain: NS3-55_12
# Database: /Volumes/Seagate_Exp_2/aedes_aegypti/blast_dbps/AaLVPC
# 0 hits found
# BLASTN 2.2.28+
# Query: gi|544185883|dbj|AB813770.1| Cell fusing agent virus NS3 gene
for non-structural protein 3, partial cds, strain: NS3-52_12
# Database: /Volumes/Seagate_Exp_2/aedes_aegypti/blast_dbps/AaLVPC
# 0 hits found
# BLASTN 2.2.28+
# Query: gi|544185881|dbj|AB813769.1| Cell fusing agent virus NS3 gene
for non-structural protein 3, partial cds, strain: NS3-50_12
# Database: /Volumes/Seagate_Exp_2/aedes_aegypti/blast_dbps/AaLVPC
# 0 hits found
# BLASTN 2.2.28+
# Query: gi|544185879|dbj|AB813768.1| Cell fusing agent virus NS3 gene
for non-structural protein 3, partial cds, strain: NS3-50_08
# Database: /Volumes/Seagate_Exp_2/aedes_aegypti/blast_dbps/AaLVPC
# 0 hits found
# BLASTN 2.2.28+
# Query: gi|544185877|dbj|AB813767.1| Cell fusing agent virus NS3 gene
for non-structural protein 3, partial cds, strain: NS3-48_12
# Database: /Volumes/Seagate_Exp_2/aedes_aegypti/blast_dbps/AaLVPC
# 0 hits found
# BLASTN 2.2.28+
```

```
# Query: gi|544185875|dbj|AB813766.1| Cell fusing agent virus NS3 gene
for non-structural protein 3, partial cds, strain: NS3-46_12
# Database: /Volumes/Seagate_Exp_2/aedes_aegypti/blast_dbps/AaLVPC
# 0 hits found
# BLASTN 2.2.28+
# Query: gi|544185873|dbj|AB813765.1| Cell fusing agent virus NS3 gene
for non-structural protein 3, partial cds, strain: NS3-45_12
# Database: /Volumes/Seagate_Exp_2/aedes_aegypti/blast_dbps/AaLVPC
# 0 hits found
# BLASTN 2.2.28+
# Query: gi|544185871|dbj|AB813764.1| Cell fusing agent virus NS3 gene
for non-structural protein 3, partial cds, strain: NS3-44_12
# Database: /Volumes/Seagate_Exp_2/aedes_aegypti/blast_dbps/AaLVPC
# 0 hits found
# BLASTN 2.2.28+
# Query: gi|544185869|dbj|AB813763.1| Cell fusing agent virus NS3 gene
for non-structural protein 3, partial cds, strain: NS3-43_12
# Database: /Volumes/Seagate_Exp_2/aedes_aegypti/blast_dbps/AaLVPC
# 0 hits found
# BLASTN 2.2.28+
# Query: gi|544185867|dbj|AB813762.1| Cell fusing agent virus NS3 gene
for non-structural protein 3, partial cds, strain: NS3-42_08
# Database: /Volumes/Seagate_Exp_2/aedes_aegypti/blast_dbps/AaLVPC
# 0 hits found
# BLASTN 2.2.28+
# Query: gi|544185865|dbj|AB813761.1| Cell fusing agent virus NS3 gene
for non-structural protein 3, partial cds, strain: NS3-23_12
# Database: /Volumes/Seagate_Exp_2/aedes_aegypti/blast_dbps/AaLVPC
# 0 hits found
# BLASTN 2.2.28+
# Query: gi|544185863|dbj|AB813760.1| Cell fusing agent virus NS3 gene
for non-structural protein 3, partial cds, strain: NS3-17_12
# Database: /Volumes/Seagate_Exp_2/aedes_aegypti/blast_dbps/AaLVPC
# 0 hits found
# BLASTN 2.2.28+
# Query: gi|544185861|dbj|AB813759.1| Cell fusing agent virus NS3 gene
for non-structural protein 3, partial cds, strain: NS3-16_12
# Database: /Volumes/Seagate_Exp_2/aedes_aegypti/blast_dbps/AaLVPC
# 0 hits found
# BLASTN 2.2.28+
# Query: gi|544185859|dbj|AB813758.1| Cell fusing agent virus NS3 gene
for non-structural protein 3, partial cds, strain: NS3-15_12
# Database: /Volumes/Seagate_Exp_2/aedes_aegypti/blast_dbps/AaLVPC
# 0 hits found
# BLASTN 2.2.28+
# Query: gi|544185857|dbj|AB813757.1| Cell fusing agent virus NS3 gene
for non-structural protein 3, partial cds, strain: NS3-11_12
# Database: /Volumes/Seagate_Exp_2/aedes_aegypti/blast_dbps/AaLVPC
# 0 hits found
# BLASTN 2.2.28+
# Query: gi|544185855|dbj|AB813756.1| Cell fusing agent virus NS3 gene
for non-structural protein 3, partial cds, strain: NS3-9_12
```

```
# Database: /Volumes/Seagate_Exp_2/aedes_aegypti/blast_dbps/AaLVPC
# 0 hits found
# BLASTN 2.2.28+
# Query: gi|544185853|dbj|AB813755.1| Cell fusing agent virus NS3 gene
for non-structural protein 3, partial cds, strain: NS3-8_12
# Database: /Volumes/Seagate_Exp_2/aedes_aegypti/blast_dbps/AaLVPC
# 0 hits found
# BLASTN 2.2.28+
# Query: gi|251823481|dbj|AB488429.1| Cell fusing agent virus gene for
polyprotein (NS3 region), partial cds, strain: Surabaya-12
# Database: /Volumes/Seagate_Exp_2/aedes_aegypti/blast_dbps/AaLVPC
# 0 hits found
# BLASTN 2.2.28+
# Query: gi|251823477|dbj|AB488427.1| Cell fusing agent virus gene for
polyprotein (NS3-h region), partial cds, strain: Surabaya-10
# Database: /Volumes/Seagate_Exp_2/aedes_aegypti/blast_dbps/AaLVPC
# 0 hits found
# BLASTN 2.2.28+
# Query: gi|251823475|dbj|AB488426.1| Cell fusing agent virus gene for
polyprotein (NS3-s region), partial cds, strain: Surabaya-10
# Database: /Volumes/Seagate_Exp_2/aedes_aegypti/blast_dbps/AaLVPC
# 0 hits found
# BLASTN 2.2.28+
# Query: gi|251823469|dbj|AB488423.1| Aedes flavivirus gene for
polyprotein (NS3-h region), partial cds, strain: Toyama-26
# Database: /Volumes/Seagate_Exp_2/aedes_aegypti/blast_dbps/AaLVPC
# 0 hits found
# BLASTN 2.2.28+
# Query: gi|251823467|dbj|AB488422.1| Aedes flavivirus gene for
polyprotein (NS3-s region), partial cds, strain: Toyama-26
# Database: /Volumes/Seagate_Exp_2/aedes_aegypti/blast_dbps/AaLVPC
# 0 hits found
# BLASTN 2.2.28+
# Query: gi|251823461|dbj|AB488419.1| Aedes flavivirus gene for
polyprotein (NS3-h region), partial cds, strain: Nagasaki-5
# Database: /Volumes/Seagate_Exp_2/aedes_aegypti/blast_dbps/AaLVPC
# 0 hits found
# BLASTN 2.2.28+
# Query: gi|251823459|dbj|AB488418.1| Aedes flavivirus gene for
polyprotein (NS3-s region), partial cds, strain: Nagasaki-5
# Database: /Volumes/Seagate_Exp_2/aedes_aegypti/blast_dbps/AaLVPC
# 0 hits found
# BLASTN 2.2.28+
# Query: gi|251823453|dbj|AB488415.1| Aedes flavivirus gene for
polyprotein (NS3 region), partial cds, strain: Mie-16
# Database: /Volumes/Seagate_Exp_2/aedes_aegypti/blast_dbps/AaLVPC
# 0 hits found
# BLASTN 2.2.28+
# Query: gi|251823451|dbj|AB488414.1| Aedes flavivirus gene for
polyprotein (NS3 region), partial cds, strain: Mie-16
# Database: /Volumes/Seagate_Exp_2/aedes_aegypti/blast_dbps/AaLVPC
# 0 hits found
```

```
# BLASTN 2.2.28+
# Query: gi|251823487|dbj|AB488432.1| Culex flavivirus gene for
polyprotein (NS3-h region), partial cds, strain: Surabaya-2
# Database: /Volumes/Seagate_Exp_2/aedes_aegypti/blast_dbps/AaLVPC
# 0 hits found
# BLASTN 2.2.28+
# Query: gi|251823485|dbj|AB488431.1| Culex flavivirus gene for
polyprotein (NS3-s region), partial cds, strain: Surabaya-2
# Database: /Volumes/Seagate_Exp_2/aedes_aegypti/blast_dbps/AaLVPC
# 0 hits found
# BLASTN 2.2.28+
# Query: gi|251823445|dbj|AB488411.1| Aedes flavivirus gene for
polyprotein (NS3-h region), partial cds, strain: Narita-24
# Database: /Volumes/Seagate_Exp_2/aedes_aegypti/blast_dbps/AaLVPC
# 0 hits found
# BLASTN 2.2.28+
# Query: gi|251823443|dbj|AB488410.1| Aedes flavivirus gene for
polyprotein (NS3-s region), partial cds, strain: Narita-24
# Database: /Volumes/Seagate_Exp_2/aedes_aegypti/blast_dbps/AaLVPC
# 0 hits found
# BLASTN 2.2.28+
# Query: gi|544185851|dbj|AB813754.1| Cell fusing agent virus E gene
for envelope protein, partial cds, strain: E312_08
# Database: /Volumes/Seagate_Exp_2/aedes_aegypti/blast_dbps/AaLVPC
# 0 hits found
# BLASTN 2.2.28+
# Query: gi|544185849|dbj|AB813753.1| Cell fusing agent virus E gene
for envelope protein, partial cds, strain: E311_08
# Database: /Volumes/Seagate_Exp_2/aedes_aegypti/blast_dbps/AaLVPC
# 0 hits found
# BLASTN 2.2.28+
# Query: gi|544185847|dbj|AB813752.1| Cell fusing agent virus E gene
for envelope protein, partial cds, strain: E233_08
# Database: /Volumes/Seagate_Exp_2/aedes_aegypti/blast_dbps/AaLVPC
# 0 hits found
# BLASTN 2.2.28+
# Query: gi|544185845|dbj|AB813751.1| Cell fusing agent virus E gene
for envelope protein, partial cds, strain: E227_08
# Database: /Volumes/Seagate_Exp_2/aedes_aegypti/blast_dbps/AaLVPC
# 0 hits found
# BLASTN 2.2.28+
# Query: gi|544185843|dbj|AB813750.1| Cell fusing agent virus E gene
for envelope protein, partial cds, strain: E175_08
# Database: /Volumes/Seagate_Exp_2/aedes_aegypti/blast_dbps/AaLVPC
# 0 hits found
# BLASTN 2.2.28+
# Query: gi|544185841|dbj|AB813749.1| Cell fusing agent virus E gene
for envelope protein, partial cds, strain: E174_08
# Database: /Volumes/Seagate_Exp_2/aedes_aegypti/blast_dbps/AaLVPC
# 0 hits found
# BLASTN 2.2.28+
```

```
# Query: gi|544185839|dbj|AB813748.1| Cell fusing agent virus E gene
for envelope protein, partial cds, strain: E173_08
# Database: /Volumes/Seagate_Exp_2/aedes_aegypti/blast_dbps/AaLVPC
# 0 hits found
# BLASTN 2.2.28+
# Query: gi|544185837|dbj|AB813747.1| Cell fusing agent virus E gene
for envelope protein, partial cds, strain: E163_08
# Database: /Volumes/Seagate_Exp_2/aedes_aegypti/blast_dbps/AaLVPC
# 0 hits found
# BLASTN 2.2.28+
# Query: gi|544185835|dbj|AB813746.1| Cell fusing agent virus E gene
for envelope protein, partial cds, strain: E158_08
# Database: /Volumes/Seagate_Exp_2/aedes_aegypti/blast_dbps/AaLVPC
# 0 hits found
# BLASTN 2.2.28+
# Query: gi|544185833|dbj|AB813745.1| Cell fusing agent virus E gene
for envelope protein, partial cds, strain: E147_08
# Database: /Volumes/Seagate_Exp_2/aedes_aegypti/blast_dbps/AaLVPC
# 0 hits found
# BLASTN 2.2.28+
# Query: gi|544185831|dbj|AB813744.1| Cell fusing agent virus E gene
for envelope protein, partial cds, strain: E141_08
# Database: /Volumes/Seagate_Exp_2/aedes_aegypti/blast_dbps/AaLVPC
# 0 hits found
# BLASTN 2.2.28+
# Query: gi|544185829|dbj|AB813743.1| Cell fusing agent virus E gene
for envelope protein, partial cds, strain: E60_12
# Database: /Volumes/Seagate_Exp_2/aedes_aegypti/blast_dbps/AaLVPC
# 0 hits found
# BLASTN 2.2.28+
# Query: gi|544185827|dbj|AB813742.1| Cell fusing agent virus E gene
for envelope protein, partial cds, strain: E55_12
# Database: /Volumes/Seagate_Exp_2/aedes_aegypti/blast_dbps/AaLVPC
# 0 hits found
# BLASTN 2.2.28+
# Query: gi|544185825|dbj|AB813741.1| Cell fusing agent virus E gene
for envelope protein, partial cds, strain: E52_12
# Database: /Volumes/Seagate_Exp_2/aedes_aegypti/blast_dbps/AaLVPC
# 0 hits found
# BLASTN 2.2.28+
# Query: gi|544185823|dbj|AB813740.1| Cell fusing agent virus E gene
for envelope protein, partial cds, strain: E50_12
# Database: /Volumes/Seagate_Exp_2/aedes_aegypti/blast_dbps/AaLVPC
# 0 hits found
# BLASTN 2.2.28+
# Query: gi|544185821|dbj|AB813739.1| Cell fusing agent virus E gene
for envelope protein, partial cds, strain: E50_08
# Database: /Volumes/Seagate_Exp_2/aedes_aegypti/blast_dbps/AaLVPC
# 0 hits found
# BLASTN 2.2.28+
# Query: gi|544185819|dbj|AB813738.1| Cell fusing agent virus E gene
for envelope protein, partial cds, strain: E48_12
```



```
# Database: /Volumes/Seagate_Exp_2/aedes_aegypti/blast_dbps/AaLVPC
# 0 hits found
# BLASTN 2.2.28+
# Query: gi|544185817|dbj|AB813737.1| Cell fusing agent virus E gene
for envelope protein, partial cds, strain: E46_12
# Database: /Volumes/Seagate_Exp_2/aedes_aegypti/blast_dbps/AaLVPC
# 0 hits found
# BLASTN 2.2.28+
# Query: gi|544185815|dbj|AB813736.1| Cell fusing agent virus E gene
for envelope protein, partial cds, strain: E45_12
# Database: /Volumes/Seagate_Exp_2/aedes_aegypti/blast_dbps/AaLVPC
# 0 hits found
# BLASTN 2.2.28+
# Query: gi|544185813|dbj|AB813735.1| Cell fusing agent virus E gene
for envelope protein, partial cds, strain: E44_12
# Database: /Volumes/Seagate_Exp_2/aedes_aegypti/blast_dbps/AaLVPC
# 0 hits found
# BLASTN 2.2.28+
# Query: gi|544185811|dbj|AB813734.1| Cell fusing agent virus E gene
for envelope protein, partial cds, strain: E43_12
# Database: /Volumes/Seagate_Exp_2/aedes_aegypti/blast_dbps/AaLVPC
# 0 hits found
# BLASTN 2.2.28+
# Query: gi|544185809|dbj|AB813733.1| Cell fusing agent virus E gene
for envelope protein, partial cds, strain: E42_08
# Database: /Volumes/Seagate_Exp_2/aedes_aegypti/blast_dbps/AaLVPC
# 0 hits found
# BLASTN 2.2.28+
# Query: gi|544185807|dbj|AB813732.1| Cell fusing agent virus E gene
for envelope protein, partial cds, strain: E23_12
# Database: /Volumes/Seagate_Exp_2/aedes_aegypti/blast_dbps/AaLVPC
# 0 hits found
# BLASTN 2.2.28+
# Query: gi|544185805|dbj|AB813731.1| Cell fusing agent virus E gene
for envelope protein, partial cds, strain: E17_12
# Database: /Volumes/Seagate_Exp_2/aedes_aegypti/blast_dbps/AaLVPC
# 0 hits found
# BLASTN 2.2.28+
# Query: gi|544185803|dbj|AB813730.1| Cell fusing agent virus E gene
for envelope protein, partial cds, strain: E16_12
# Database: /Volumes/Seagate_Exp_2/aedes_aegypti/blast_dbps/AaLVPC
# 0 hits found
# BLASTN 2.2.28+
# Query: gi|544185801|dbj|AB813729.1| Cell fusing agent virus E gene
for envelope protein, partial cds, strain: E15_12
# Database: /Volumes/Seagate_Exp_2/aedes_aegypti/blast_dbps/AaLVPC
# 0 hits found
# BLASTN 2.2.28+
# Query: gi|544185799|dbj|AB813728.1| Cell fusing agent virus E gene
for envelope protein, partial cds, strain: E11_12
# Database: /Volumes/Seagate_Exp_2/aedes_aegypti/blast_dbps/AaLVPC
# 0 hits found
```

```

# BLASTN 2.2.28+
# Query: gi|544185797|dbj|AB813727.1| Cell fusing agent virus E gene
for envelope protein, partial cds, strain: E9_12
# Database: /Volumes/Seagate_Exp_2/aedes_aegypti/blast_dbps/AaLVPC
# 0 hits found
# BLASTN 2.2.28+
# Query: gi|544185795|dbj|AB813726.1| Cell fusing agent virus E gene
for envelope protein, partial cds, strain: E8_12
# Database: /Volumes/Seagate_Exp_2/aedes_aegypti/blast_dbps/AaLVPC
# 0 hits found
# BLASTN 2.2.28+
# Query: gi|251823465|dbj|AB488421.1| Aedes flavivirus gene for
polyprotein (E region), partial cds, strain: Toyama-26
# Database: /Volumes/Seagate_Exp_2/aedes_aegypti/blast_dbps/AaLVPC
# 0 hits found
# BLASTN 2.2.28+
# Query: gi|251823457|dbj|AB488417.1| Aedes flavivirus gene for
polyprotein (E region), partial cds, strain: Nagasaki-5
# Database: /Volumes/Seagate_Exp_2/aedes_aegypti/blast_dbps/AaLVPC
# 0 hits found
# BLASTN 2.2.28+
# Query: gi|251823449|dbj|AB488413.1| Aedes flavivirus gene for
polyprotein (E region), partial cds, strain: Mie-16
# Database: /Volumes/Seagate_Exp_2/aedes_aegypti/blast_dbps/AaLVPC
# 0 hits found
# BLASTN 2.2.28+
# Query: gi|251823441|dbj|AB488409.1| Aedes flavivirus gene for
polyprotein (E region), partial cds, strain: Narita-24
# Database: /Volumes/Seagate_Exp_2/aedes_aegypti/blast_dbps/AaLVPC
# 0 hits found
# BLASTN 2.2.28+
# Query: gi|427379077|gb|JX860637.1| Aedes flavivirus strain A30
polymerase gene, partial cds
# Database: /Volumes/Seagate_Exp_2/aedes_aegypti/blast_dbps/AaLVPC
# 0 hits found
# BLASTN 2.2.28+
# Query: gi|427379075|gb|JX860636.1| Aedes flavivirus strain A22
polymerase gene, partial cds
# Database: /Volumes/Seagate_Exp_2/aedes_aegypti/blast_dbps/AaLVPC
# 0 hits found
# BLASTN 2.2.28+
# Query: gi|427379073|gb|JX860635.1| Aedes flavivirus strain A14
polymerase gene, partial cds
# Database: /Volumes/Seagate_Exp_2/aedes_aegypti/blast_dbps/AaLVPC
# 0 hits found
# BLASTN 2.2.28+
# Query: gi|427379071|gb|JX860634.1| Aedes flavivirus strain A4
polymerase gene, partial cds
# Database: /Volumes/Seagate_Exp_2/aedes_aegypti/blast_dbps/AaLVPC
# 0 hits found
# BLASTN 2.2.28+

```

```

# Query: gi|9627242|ref|NC_001564.1| Cell fusing agent virus, complete
genome
# Database: /Volumes/Seagate_Exp_2/aedes_aegypti/blast_dbps/AaLVPC
# Fields: query id, subject id, % identity, alignment length,
mismatches, gap opens, q. start, q. end, s. start, s. end, evaluate, bit
score
# 3 hits found
gi|9627242|ref|NC_001564.1| AAGE02006399.1  96.79 343  10  1  3923
    4264 6457 6799 1e-159 571
gi|9627242|ref|NC_001564.1| AAGE02006399.1  97.19 178  3  1  7321
    7496 6412 6235 6e-78 300
gi|9627242|ref|NC_001564.1| AAGE02006399.1  94.02 184  11  0  8559
    8742 6249 6066 7e-72 279
# BLASTN 2.2.28+
# Query: gi|33620713|ref|NC_005064.1| Kamiti River virus, complete
genome
# Database: /Volumes/Seagate_Exp_2/aedes_aegypti/blast_dbps/AaLVPC
# 0 hits found
# BLASTN 2.2.28+
# Query: gi|30316448|gb|AY149904.1| Kamiti River virus isolate SR-75
polyprotein precursor, gene, complete cds
# Database: /Volumes/Seagate_Exp_2/aedes_aegypti/blast_dbps/AaLVPC
# 0 hits found
# BLASTN 2.2.28+
# Query: gi|30316441|gb|AY149905.1| Kamiti River virus isolate SR-82
polyprotein precursor, gene, complete cds
# Database: /Volumes/Seagate_Exp_2/aedes_aegypti/blast_dbps/AaLVPC
# 0 hits found
# BLASTN 2.2.28+
# Query: gi|254688376|ref|NC_012932.1| Aedes flavivirus genomic RNA,
complete genome, strain: Narita-21
# Database: /Volumes/Seagate_Exp_2/aedes_aegypti/blast_dbps/AaLVPC
# 0 hits found
# BLASTN 2.2.28+
# Query: gi|251823439|dbj|AB488408.1| Aedes flavivirus genomic RNA,
complete genome, strain: Narita-21
# Database: /Volumes/Seagate_Exp_2/aedes_aegypti/blast_dbps/AaLVPC
# 0 hits found
# BLASTN 2.2.28+
# Query: gi|480542369|gb|KC181923.1| Aedes flavivirus strain AEFV-
SPFLD-MO-2011-MP6, complete genome
# Database: /Volumes/Seagate_Exp_2/aedes_aegypti/blast_dbps/AaLVPC
# 0 hits found
# BLASTN 2.2.28+
# Query: gi|440647090|dbj|AB701774.1| Culex flavivirus RNA, complete
genome, strain: Toyama861
# Database: /Volumes/Seagate_Exp_2/aedes_aegypti/blast_dbps/AaLVPC
# 0 hits found
# BLASTN 2.2.28+
# Query: gi|440647088|dbj|AB701773.1| Culex flavivirus RNA, complete
genome, strain: Toyama791
# Database: /Volumes/Seagate_Exp_2/aedes_aegypti/blast_dbps/AaLVPC

```

```
# 0 hits found
# BLASTN 2.2.28+
# Query: gi|440647086|dbj|AB701772.1| Culex flavivirus RNA, complete genome, strain: Toyama740
# Database: /Volumes/Seagate_Exp_2/aedes_aegypti/blast_dbps/AaLVPC
# 0 hits found
# BLASTN 2.2.28+
# Query: gi|440647084|dbj|AB701771.1| Culex flavivirus RNA, complete genome, strain: Toyama75
# Database: /Volumes/Seagate_Exp_2/aedes_aegypti/blast_dbps/AaLVPC
# 0 hits found
# BLASTN 2.2.28+
# Query: gi|440647082|dbj|AB701770.1| Culex flavivirus RNA, complete genome, strain: Toyama41
# Database: /Volumes/Seagate_Exp_2/aedes_aegypti/blast_dbps/AaLVPC
# 0 hits found
# BLASTN 2.2.28+
# Query: gi|440647080|dbj|AB701769.1| Culex flavivirus RNA, complete genome, strain: Toyama1849
# Database: /Volumes/Seagate_Exp_2/aedes_aegypti/blast_dbps/AaLVPC
# 0 hits found
# BLASTN 2.2.28+
# Query: gi|440647078|dbj|AB701768.1| Culex flavivirus RNA, complete genome, strain: Toyama1701
# Database: /Volumes/Seagate_Exp_2/aedes_aegypti/blast_dbps/AaLVPC
# 0 hits found
# BLASTN 2.2.28+
# Query: gi|440647076|dbj|AB701767.1| Culex flavivirus RNA, complete genome, strain: Toyama734
# Database: /Volumes/Seagate_Exp_2/aedes_aegypti/blast_dbps/AaLVPC
# 0 hits found
# BLASTN 2.2.28+
# Query: gi|440647074|dbj|AB701766.1| Culex flavivirus RNA, complete genome, strain: Toyama71
# Database: /Volumes/Seagate_Exp_2/aedes_aegypti/blast_dbps/AaLVPC
# 0 hits found
# BLASTN 2.2.28+
# Query: gi|440647094|dbj|AB701776.1| Culex flavivirus RNA, complete genome, strain: Toyama2627
# Database: /Volumes/Seagate_Exp_2/aedes_aegypti/blast_dbps/AaLVPC
# 0 hits found
# BLASTN 2.2.28+
# Query: gi|380851304|gb|JQ308190.1| Culex flavivirus isolate DG1007, complete genome
# Database: /Volumes/Seagate_Exp_2/aedes_aegypti/blast_dbps/AaLVPC
# 0 hits found
# BLASTN 2.2.28+
# Query: gi|380851302|gb|JQ308189.1| Culex flavivirus isolate DG1068, complete genome
# Database: /Volumes/Seagate_Exp_2/aedes_aegypti/blast_dbps/AaLVPC
# 0 hits found
# BLASTN 2.2.28+
```

```

# Query: gi|380851300|gb|JQ308188.1| Culex flavivirus isolate DG1064,
complete genome
# Database: /Volumes/Seagate_Exp_2/aedes_aegypti/blast_dbps/AaLVPC
# 0 hits found
# BLASTN 2.2.28+
# Query: gi|380851298|gb|JQ308187.1| Culex flavivirus isolate HLD105,
complete genome
# Database: /Volumes/Seagate_Exp_2/aedes_aegypti/blast_dbps/AaLVPC
# 0 hits found
# BLASTN 2.2.28+
# Query: gi|380851296|gb|JQ308186.1| Culex flavivirus isolate HLD102,
complete genome
# Database: /Volumes/Seagate_Exp_2/aedes_aegypti/blast_dbps/AaLVPC
# 0 hits found
# BLASTN 2.2.28+
# Query: gi|247893526|gb|FJ663034.1| Culex flavivirus isolate Iowa07,
complete genome
# Database: /Volumes/Seagate_Exp_2/aedes_aegypti/blast_dbps/AaLVPC
# 0 hits found
# BLASTN 2.2.28+
# Query: gi|219944306|gb|FJ502995.1| Culex flavivirus strain HOU24518,
complete genome
# Database: /Volumes/Seagate_Exp_2/aedes_aegypti/blast_dbps/AaLVPC
# 0 hits found
# BLASTN 2.2.28+
# Query: gi|166159177|ref|NC_008604.2| Culex flavivirus, complete
genome
# Database: /Volumes/Seagate_Exp_2/aedes_aegypti/blast_dbps/AaLVPC
# 0 hits found
# BLASTN 2.2.28+
# Query: gi|215274030|gb|EU879060.1| Culex flavivirus strain CxFV-
Mex07, complete genome
# Database: /Volumes/Seagate_Exp_2/aedes_aegypti/blast_dbps/AaLVPC
# 0 hits found
# BLASTN 2.2.28+
# Query: gi|229904919|ref|NC_012671.1| Quang Binh virus, complete
genome
# Database: /Volumes/Seagate_Exp_2/aedes_aegypti/blast_dbps/AaLVPC
# 0 hits found
# BLASTN 2.2.28+
# Query: gi|229270300|gb|FJ644291.1| Quang Binh virus isolate VN180,
complete genome
# Database: /Volumes/Seagate_Exp_2/aedes_aegypti/blast_dbps/AaLVPC
# 0 hits found
# BLASTN 2.2.28+
# Query: gi|226374362|gb|AY632535.2| Zika virus strain MR 766,
complete genome
# Database: /Volumes/Seagate_Exp_2/aedes_aegypti/blast_dbps/AaLVPC
# 0 hits found
# BLASTN 2.2.28+
# Query: gi|62421411|gb|AY898809.1| Alfuy virus strain MRM3929,
complete genome

```

```

# Database: /Volumes/Seagate_Exp_2/aedes_aegypti/blast_dbps/AaLVPC
# 0 hits found
# BLASTN 2.2.28+
# Query: gi|226374363|gb|AY632536.4| Bussuquara virus strain BeAn
4073, complete genome
# Database: /Volumes/Seagate_Exp_2/aedes_aegypti/blast_dbps/AaLVPC
# 0 hits found
# BLASTN 2.2.28+
# Query: gi|54287947|gb|AY762084.1| Dengue virus type 1 strain
Singapore 8114/93, complete genome
# Database: /Volumes/Seagate_Exp_2/aedes_aegypti/blast_dbps/AaLVPC
# 0 hits found
# BLASTN 2.2.28+
# Query: gi|1854036|gb|U88535.1|DVU88535 Dengue virus type 1 clone
WestPac, complete genome
# Database: /Volumes/Seagate_Exp_2/aedes_aegypti/blast_dbps/AaLVPC
# 0 hits found
# BLASTN 2.2.28+
# Query: gi|56809013|gb|AY702040.1| Dengue virus type 2 strain
I348600, complete genome
# Database: /Volumes/Seagate_Exp_2/aedes_aegypti/blast_dbps/AaLVPC
# 0 hits found
# BLASTN 2.2.28+
# Query: gi|77024326|gb|DQ181799.1| Dengue virus type 2 strain
ThD2_0017_98, complete genome
# Database: /Volumes/Seagate_Exp_2/aedes_aegypti/blast_dbps/AaLVPC
# 0 hits found
# BLASTN 2.2.28+
# Query: gi|145413601|gb|AY858044.2| Dengue virus 3 strain KJ71,
complete genome
# Database: /Volumes/Seagate_Exp_2/aedes_aegypti/blast_dbps/AaLVPC
# 0 hits found
# BLASTN 2.2.28+
# Query: gi|58200446|gb|AY744685.1| Dengue virus type 3 isolate
PF94/136116, complete genome
# Database: /Volumes/Seagate_Exp_2/aedes_aegypti/blast_dbps/AaLVPC
# 0 hits found
# BLASTN 2.2.28+
# Query: gi|145413606|gb|AY858047.2| Dengue virus 3 strain TB16,
complete genome
# Database: /Volumes/Seagate_Exp_2/aedes_aegypti/blast_dbps/AaLVPC
# 0 hits found
# BLASTN 2.2.28+
# Query: gi|54287949|gb|AY762085.1| Dengue virus type 4 strain
Singapore 8976/95, complete genome
# Database: /Volumes/Seagate_Exp_2/aedes_aegypti/blast_dbps/AaLVPC
# 0 hits found
# BLASTN 2.2.28+
# Query: gi|53653742|gb|AY618988.1| Dengue virus type 4 strain
ThD4_0476_97, complete genome
# Database: /Volumes/Seagate_Exp_2/aedes_aegypti/blast_dbps/AaLVPC
# 0 hits found

```

```

# BLASTN 2.2.28+
# Query: gi|9626460|ref|NC_001437.1| Japanese encephalitis virus,
genome
# Database: /Volumes/Seagate_Exp_2/aedes_aegypti/blast_dbps/AaLVPC
# 0 hits found
# BLASTN 2.2.28+
# Query: gi|331329|gb|M18370.1|JEVCG Japanese encephalitis virus
(strain JaOArS982), complete genome
# Database: /Volumes/Seagate_Exp_2/aedes_aegypti/blast_dbps/AaLVPC
# 0 hits found
# BLASTN 2.2.28+
# Query: gi|6970067|gb|AF221499.1| Japanese encephalitis virus isolate
CH2195LA, complete genome
# Database: /Volumes/Seagate_Exp_2/aedes_aegypti/blast_dbps/AaLVPC
# 0 hits found
# BLASTN 2.2.28+
# Query: gi|81687252|dbj|AB241119.1| Japanese encephalitis virus
genomic RNA, complete genome, strain: JEV/sw/Mie/41/2002
# Database: /Volumes/Seagate_Exp_2/aedes_aegypti/blast_dbps/AaLVPC
# 0 hits found
# BLASTN 2.2.28+
# Query: gi|56744202|dbj|AB196925.1| Japanese encephalitis virus
genomic RNA, complete genome, clone:JEV-rAT
# Database: /Volumes/Seagate_Exp_2/aedes_aegypti/blast_dbps/AaLVPC
# 0 hits found
# BLASTN 2.2.28+
# Query: gi|119067955|gb|EF107523.1| Japanese encephalitis virus
strain WHe, complete genome
# Database: /Volumes/Seagate_Exp_2/aedes_aegypti/blast_dbps/AaLVPC
# 0 hits found
# BLASTN 2.2.28+
# Query: gi|226374366|gb|AY632540.2| Kedougou virus strain DakAar
D1470, complete genome
# Database: /Volumes/Seagate_Exp_2/aedes_aegypti/blast_dbps/AaLVPC
# 0 hits found
# BLASTN 2.2.28+
# Query: gi|226374367|gb|AY632541.4| Kokobera virus strain AusMRM 32,
complete genome
# Database: /Volumes/Seagate_Exp_2/aedes_aegypti/blast_dbps/AaLVPC
# 0 hits found
# BLASTN 2.2.28+
# Query: gi|294719514|ref|NC_009029.2| Kokobera virus, complete genome
# Database: /Volumes/Seagate_Exp_2/aedes_aegypti/blast_dbps/AaLVPC
# 0 hits found
# BLASTN 2.2.28+
# Query: gi|6175826|gb|AF161266.1| Murray Valley encephalitis virus
strain MVE-1-51, complete genome
# Database: /Volumes/Seagate_Exp_2/aedes_aegypti/blast_dbps/AaLVPC
# 0 hits found
# BLASTN 2.2.28+
# Query: gi|226534288|gb|AY632542.4| Rocio virus strain SPH 34675,
complete genome

```

```
# Database: /Volumes/Seagate_Exp_2/aedes_aegypti/blast_dbps/AaLVPC
# 0 hits found
# BLASTN 2.2.28+
# Query: gi|109692178|gb|DQ525916.1| St. Louis encephalitis virus
strain Kern217, complete genome
# Database: /Volumes/Seagate_Exp_2/aedes_aegypti/blast_dbps/AaLVPC
# 0 hits found
# BLASTN 2.2.28+
# Query: gi|45378907|gb|AY453411.1| Usutu virus strain Vienna 2001
from Austria, complete genome
# Database: /Volumes/Seagate_Exp_2/aedes_aegypti/blast_dbps/AaLVPC
# 0 hits found
# BLASTN 2.2.28+
# Query: gi|56692441|ref|NC_006551.1| Usutu virus, complete genome
# Database: /Volumes/Seagate_Exp_2/aedes_aegypti/blast_dbps/AaLVPC
# 0 hits found
# BLASTN 2.2.28+
# Query: gi|45378909|gb|AY453412.1| Usutu virus strain SAAR-1776 from
South Africa, complete genome
# Database: /Volumes/Seagate_Exp_2/aedes_aegypti/blast_dbps/AaLVPC
# 0 hits found
# BLASTN 2.2.28+
# Query: gi|83699610|gb|DQ256376.1| West Nile virus strain 804994,
complete genome
# Database: /Volumes/Seagate_Exp_2/aedes_aegypti/blast_dbps/AaLVPC
# 0 hits found
# BLASTN 2.2.28+
# Query: gi|30349729|gb|AY278441.1| West Nile virus isolate Ast99-901,
complete genome
# Database: /Volumes/Seagate_Exp_2/aedes_aegypti/blast_dbps/AaLVPC
# 0 hits found
# BLASTN 2.2.28+
# Query: gi|84028434|gb|DQ318020.1| Wets Nile virus strain ArB3573/82,
complete genome
# Database: /Volumes/Seagate_Exp_2/aedes_aegypti/blast_dbps/AaLVPC
# 0 hits found
# BLASTN 2.2.28+
# Query: gi|9930135|gb|AF260968.1| West Nile virus strain Eg101,
complete genome
# Database: /Volumes/Seagate_Exp_2/aedes_aegypti/blast_dbps/AaLVPC
# 0 hits found
# BLASTN 2.2.28+
# Query: gi|73913543|gb|DQ116961.1| West Nile virus isolate goshawk-
Hungary/04, complete genome
# Database: /Volumes/Seagate_Exp_2/aedes_aegypti/blast_dbps/AaLVPC
# 0 hits found
# BLASTN 2.2.28+
# Query: gi|89148117|gb|DQ118127.1| West Nile virus isolate goose-
Hungary/03, complete genome
# Database: /Volumes/Seagate_Exp_2/aedes_aegypti/blast_dbps/AaLVPC
# 0 hits found
# BLASTN 2.2.28+
```



```

# Query: gi|30349725|gb|AY277251.1| West Nile virus isolate LEIV-
Krnd88-190, complete genome
# Database: /Volumes/Seagate_Exp_2/aedes_aegypti/blast_dbps/AaLVPC
# 0 hits found
# BLASTN 2.2.28+
# Query: gi|30349731|gb|AY278442.1| West Nile virus isolate LEIV-
Vlg00-27924, complete genome
# Database: /Volumes/Seagate_Exp_2/aedes_aegypti/blast_dbps/AaLVPC
# 0 hits found
# BLASTN 2.2.28+
# Query: gi|58702120|gb|AY765264.1| West Nile virus strain Rabensburg
isolate 97-103, complete genome
# Database: /Volumes/Seagate_Exp_2/aedes_aegypti/blast_dbps/AaLVPC
# 0 hits found
# BLASTN 2.2.28+
# Query: gi|51095221|gb|AY688948.1| West Nile virus strain Sarafend,
complete genome
# Database: /Volumes/Seagate_Exp_2/aedes_aegypti/blast_dbps/AaLVPC
# 0 hits found
# BLASTN 2.2.28+
# Query: gi|9627244|ref|NC_002031.1| Yellow fever virus, complete
genome
# Database: /Volumes/Seagate_Exp_2/aedes_aegypti/blast_dbps/AaLVPC
# 0 hits found
# BLASTN 2.2.28+
# Query: gi|63147726|gb|AY968064.1| Yellow fever virus strain
Angola71, complete genome
# Database: /Volumes/Seagate_Exp_2/aedes_aegypti/blast_dbps/AaLVPC
# 0 hits found
# BLASTN 2.2.28+
# Query: gi|63147728|gb|AY968065.1| Yellow fever virus strain
Uganda48a, complete genome
# Database: /Volumes/Seagate_Exp_2/aedes_aegypti/blast_dbps/AaLVPC
# 0 hits found
# BLASTN 2.2.28+
# Query: gi|226374364|gb|AY632538.4| Iguape virus strain SPAn 71686,
complete genome
# Database: /Volumes/Seagate_Exp_2/aedes_aegypti/blast_dbps/AaLVPC
# 0 hits found
# BLASTN 2.2.28+
# Query: gi|22474435|emb|AJ299445.1| Montana myotis leukoencephalitis
virus complete genomic RNA
# Database: /Volumes/Seagate_Exp_2/aedes_aegypti/blast_dbps/AaLVPC
# 0 hits found
# BLASTN 2.2.28+
# Query: gi|20178608|ref|NC_003675.1| Rio Bravo virus, genome
# Database: /Volumes/Seagate_Exp_2/aedes_aegypti/blast_dbps/AaLVPC
# 0 hits found
# BLASTN 2.2.28+
# Query: gi|383215103|gb|JQ582840.1| Rio Bravo virus strain M64,
complete genome
# Database: /Volumes/Seagate_Exp_2/aedes_aegypti/blast_dbps/AaLVPC

```

```

# 0 hits found
# BLASTN 2.2.28+
# Query: gi|82791368|gb|DQ235145.1| Gadgets Gully virus from Australia
polyprotein gene, complete cds
# Database: /Volumes/Seagate_Exp_2/aedes_aegypti/blast_dbps/AaLVPC
# 0 hits found
# BLASTN 2.2.28+
# Query: gi|82791370|gb|DQ235146.1| Kadam virus from Uganda
polyprotein gene, complete cds
# Database: /Volumes/Seagate_Exp_2/aedes_aegypti/blast_dbps/AaLVPC
# 0 hits found
# BLASTN 2.2.28+
# Query: gi|92090928|gb|DQ462443.1| Karshi virus strain LEIV-7192 Tur,
complete genome
# Database: /Volumes/Seagate_Exp_2/aedes_aegypti/blast_dbps/AaLVPC
# 0 hits found
# BLASTN 2.2.28+
# Query: gi|20260781|ref|NC_003690.1| Langat virus, complete genome
# Database: /Volumes/Seagate_Exp_2/aedes_aegypti/blast_dbps/AaLVPC
# 0 hits found
# BLASTN 2.2.28+
# Query: gi|33589253|ref|NC_005062.1| Omsk hemorrhagic fever virus,
complete genome
# Database: /Volumes/Seagate_Exp_2/aedes_aegypti/blast_dbps/AaLVPC
# 0 hits found
# BLASTN 2.2.28+
# Query: gi|33520436|gb|AY193805.1| Omsk hemorrhagic fever virus
strain Bogoluvovska, complete genome
# Database: /Volumes/Seagate_Exp_2/aedes_aegypti/blast_dbps/AaLVPC
# 0 hits found
# BLASTN 2.2.28+
# Query: gi|41019254|gb|AY438626.1| Omsk hemorrhagic fever virus
strain Kubrin, complete genome
# Database: /Volumes/Seagate_Exp_2/aedes_aegypti/blast_dbps/AaLVPC
# 0 hits found
# BLASTN 2.2.28+
# Query: gi|20260779|ref|NC_003687.1| Powassan virus, complete genome
# Database: /Volumes/Seagate_Exp_2/aedes_aegypti/blast_dbps/AaLVPC
# 0 hits found
# BLASTN 2.2.28+
# Query: gi|300834854|gb|HM440563.1| Powassan virus strain 64-7062
isolate POWANY64, complete genome
# Database: /Volumes/Seagate_Exp_2/aedes_aegypti/blast_dbps/AaLVPC
# 0 hits found
# BLASTN 2.2.28+
# Query: gi|300834852|gb|HM440562.1| Powassan virus isolate DTVWiC08,
complete genome
# Database: /Volumes/Seagate_Exp_2/aedes_aegypti/blast_dbps/AaLVPC
# 0 hits found
# BLASTN 2.2.28+
# Query: gi|300834846|gb|HM440559.1| Powassan virus strain NFS001
isolate DTVMa96, complete genome

```

```

# Database: /Volumes/Seagate_Exp_2/aedes_aegypti/blast_dbps/AaLVPC
# 0 hits found
# BLASTN 2.2.28+
# Query: gi|345294801|gb|HQ231415.1| Powassan virus strain Ternay,
complete genome
# Database: /Volumes/Seagate_Exp_2/aedes_aegypti/blast_dbps/AaLVPC
# 0 hits found
# BLASTN 2.2.28+
# Query: gi|345294799|gb|HQ231414.1| Powassan virus strain Ulysses,
complete genome
# Database: /Volumes/Seagate_Exp_2/aedes_aegypti/blast_dbps/AaLVPC
# 0 hits found
# BLASTN 2.2.28+
# Query: gi|300834844|gb|HM440558.1| Powassan virus strain wicf9901
isolate DTVWi99, complete genome
# Database: /Volumes/Seagate_Exp_2/aedes_aegypti/blast_dbps/AaLVPC
# 0 hits found
# BLASTN 2.2.28+
# Query: gi|9628431|ref|NC_001672.1| Tick-borne encephalitis virus,
complete genome
# Database: /Volumes/Seagate_Exp_2/aedes_aegypti/blast_dbps/AaLVPC
# 0 hits found
# BLASTN 2.2.28+
# Query: gi|30385207|gb|AY217093.1| Tick-borne encephalitis virus
strain MDJ-01 nonfunctional polyprotein gene, complete sequence
# Database: /Volumes/Seagate_Exp_2/aedes_aegypti/blast_dbps/AaLVPC
# 0 hits found
# BLASTN 2.2.28+
# Query: gi|21397174|ref|NC_003996.1| Tamana bat virus, genome
# Database: /Volumes/Seagate_Exp_2/aedes_aegypti/blast_dbps/AaLVPC
# 0 hits found
# BLASTN 2.2.28+
# Query: gi|33285930|gb|AY223845.1| Aedes albopictus containing
putative integrated non-retroviral sequence
# Database: /Volumes/Seagate_Exp_2/aedes_aegypti/blast_dbps/AaLVPC
# 0 hits found
# BLASTN 2.2.28+
# Query: gi|33285929|gb|AY223844.1| Aedes albopictus containing
putative integrated non-retroviral sequence
# Database: /Volumes/Seagate_Exp_2/aedes_aegypti/blast_dbps/AaLVPC
# Fields: query id, subject id, % identity, alignment length,
mismatches, gap opens, q. start, q. end, s. start, s. end, evalue, bit
score
# 1167 hits found
gi|33285929|gb|AY223844.1| AAGE02013667.1 90.07 282 28 0 2753
3034 25847 25566 2e-98 366
gi|33285929|gb|AY223844.1| AAGE02013667.1 88.19 288 32 2 2746
3033 11508 11793 3e-91 342
gi|33285929|gb|AY223844.1| AAGE02013667.1 100.00 29 0 0
2961 2989 21710 21682 1e-04 54.7
gi|33285929|gb|AY223844.1| AAGE02003018.1 90.07 282 28 0 2753
3034 13559 13278 2e-98 366

```

|                                |                |        |     |    |    |      |
|--------------------------------|----------------|--------|-----|----|----|------|
| gi 33285929 gb AY223844.1      | AAGE02003018.1 | 91.80  | 183 | 11 | 4  | 2755 |
| 2935 20447 20627 5e-64 252     |                |        |     |    |    |      |
| gi 33285929 gb AY223844.1      | AAGE02003018.1 | 100.00 |     | 29 | 0  | 0    |
| 2961 2989 7956 7928 1e-04 54.7 |                |        |     |    |    |      |
| gi 33285929 gb AY223844.1      | AAGE02034674.1 | 88.85  | 296 | 27 | 6  | 2747 |
| 3038 7012 6719 3e-96 359       |                |        |     |    |    |      |
| gi 33285929 gb AY223844.1      | AAGE02003399.1 | 88.78  | 294 | 28 | 5  | 2751 |
| 3041 112504 112795 4e-95 355   |                |        |     |    |    |      |
| gi 33285929 gb AY223844.1      | AAGE02003399.1 | 88.70  | 239 | 21 | 6  | 2758 |
| 2990 49120 48882 1e-74 287     |                |        |     |    |    |      |
| gi 33285929 gb AY223844.1      | AAGE02003399.1 | 86.83  | 243 | 22 | 7  | 2753 |
| 2990 67772 67535 2e-67 263     |                |        |     |    |    |      |
| gi 33285929 gb AY223844.1      | AAGE02003399.1 | 83.27  | 245 | 24 | 7  | 2751 |
| 2990 113903 113671 3e-51 209   |                |        |     |    |    |      |
| gi 33285929 gb AY223844.1      | AAGE02009803.1 | 89.16  | 286 | 25 | 6  | 2754 |
| 3036 25569 25851 5e-94 351     |                |        |     |    |    |      |
| gi 33285929 gb AY223844.1      | AAGE02028199.1 | 88.89  | 288 | 27 | 5  | 2751 |
| 3035 13826 13541 2e-93 350     |                |        |     |    |    |      |
| gi 33285929 gb AY223844.1      | AAGE02024903.1 | 88.89  | 288 | 27 | 5  | 2751 |
| 3035 12326 12041 2e-93 350     |                |        |     |    |    |      |
| gi 33285929 gb AY223844.1      | AAGE02013394.1 | 88.89  | 288 | 27 | 5  | 2751 |
| 3035 7494 7779 2e-93 350       |                |        |     |    |    |      |
| gi 33285929 gb AY223844.1      | AAGE02000072.1 | 88.66  | 291 | 28 | 5  | 2748 |
| 3035 48590 48878 2e-93 350     |                |        |     |    |    |      |
| gi 33285929 gb AY223844.1      | AAGE02000072.1 | 86.18  | 246 | 28 | 6  | 2751 |
| 2990 73822 73577 8e-67 261     |                |        |     |    |    |      |
| gi 33285929 gb AY223844.1      | AAGE02000072.1 | 89.13  | 184 | 16 | 3  | 2757 |
| 2936 21333 21150 3e-56 226     |                |        |     |    |    |      |
| gi 33285929 gb AY223844.1      | AAGE02002599.1 | 88.62  | 290 | 28 | 5  | 2750 |
| 3036 50260 50547 6e-93 348     |                |        |     |    |    |      |
| gi 33285929 gb AY223844.1      | AAGE02002599.1 | 87.02  | 285 | 33 | 4  | 2757 |
| 3039 24112 24394 5e-84 318     |                |        |     |    |    |      |
| gi 33285929 gb AY223844.1      | AAGE02002599.1 | 88.51  | 235 | 21 | 6  | 2762 |
| 2990 180107 179873 2e-72 279   |                |        |     |    |    |      |
| gi 33285929 gb AY223844.1      | AAGE02001761.1 | 88.85  | 287 | 27 | 5  | 2752 |
| 3035 55227 54943 6e-93 348     |                |        |     |    |    |      |
| gi 33285929 gb AY223844.1      | AAGE02001667.1 | 89.08  | 284 | 25 | 6  | 2759 |
| 3038 58492 58773 6e-93 348     |                |        |     |    |    |      |
| gi 33285929 gb AY223844.1      | AAGE02001667.1 | 86.25  | 291 | 30 | 10 | 2758 |
| 3042 167356 167070 1e-80 307   |                |        |     |    |    |      |
| gi 33285929 gb AY223844.1      | AAGE02001667.1 | 88.07  | 243 | 23 | 5  | 2754 |
| 2990 31353 31111 2e-73 283     |                |        |     |    |    |      |
| gi 33285929 gb AY223844.1      | AAGE02001667.1 | 82.87  | 286 | 35 | 9  | 2754 |
| 3035 12232 12507 8e-62 244     |                |        |     |    |    |      |
| gi 33285929 gb AY223844.1      | AAGE02001667.1 | 82.86  | 105 | 14 | 3  | 2750 |
| 2853 87891 87790 1e-15 91.6    |                |        |     |    |    |      |
| gi 33285929 gb AY223844.1      | AAGE02000467.1 | 88.40  | 293 | 28 | 6  | 2747 |
| 3035 54882 55172 6e-93 348     |                |        |     |    |    |      |
| gi 33285929 gb AY223844.1      | AAGE02000467.1 | 86.78  | 227 | 22 | 7  | 2775 |
| 2997 25374 25152 2e-62 246     |                |        |     |    |    |      |
| gi 33285929 gb AY223844.1      | AAGE02000467.1 | 87.04  | 54  | 6  | 1  | 2938 |
| 2990 15201 15254 3e-06 60.2    |                |        |     |    |    |      |

|    |                              |                |       |     |    |    |      |
|----|------------------------------|----------------|-------|-----|----|----|------|
| gi | 33285929 gb AY223844.1       | AAGE02000330.1 | 89.08 | 284 | 26 | 5  | 2755 |
|    | 3035 218353 218072 6e-93 348 |                |       |     |    |    |      |
| gi | 33285929 gb AY223844.1       | AAGE02032368.1 | 88.54 | 288 | 29 | 4  | 2751 |
|    | 3035 13581 13295 2e-92 346   |                |       |     |    |    |      |
| gi | 33285929 gb AY223844.1       | AAGE02025641.1 | 88.32 | 291 | 31 | 3  | 2747 |
|    | 3035 73086 73375 2e-92 346   |                |       |     |    |    |      |
| gi | 33285929 gb AY223844.1       | AAGE02025641.1 | 90.16 | 244 | 18 | 6  | 2753 |
|    | 2990 90235 90478 2e-82 313   |                |       |     |    |    |      |
| gi | 33285929 gb AY223844.1       | AAGE02025641.1 | 81.02 | 216 | 35 | 6  | 2759 |
|    | 2968 105008 105223 2e-38 167 |                |       |     |    |    |      |
| gi | 33285929 gb AY223844.1       | AAGE02017249.1 | 88.54 | 288 | 29 | 4  | 2751 |
|    | 3035 55607 55893 2e-92 346   |                |       |     |    |    |      |
| gi | 33285929 gb AY223844.1       | AAGE02015343.1 | 88.18 | 296 | 28 | 7  | 2751 |
|    | 3041 38522 38229 2e-92 346   |                |       |     |    |    |      |
| gi | 33285929 gb AY223844.1       | AAGE02004318.1 | 88.81 | 286 | 27 | 5  | 2753 |
|    | 3035 69907 69624 2e-92 346   |                |       |     |    |    |      |
| gi | 33285929 gb AY223844.1       | AAGE02000545.1 | 88.58 | 289 | 27 | 6  | 2751 |
|    | 3035 77448 77734 2e-92 346   |                |       |     |    |    |      |
| gi | 33285929 gb AY223844.1       | AAGE02000545.1 | 87.55 | 241 | 25 | 5  | 2751 |
|    | 2986 71901 72141 1e-70 274   |                |       |     |    |    |      |
| gi | 33285929 gb AY223844.1       | AAGE02000545.1 | 84.86 | 218 | 29 | 3  | 2777 |
|    | 2990 65005 65222 2e-53 217   |                |       |     |    |    |      |
| gi | 33285929 gb AY223844.1       | AAGE02029104.1 | 88.50 | 287 | 29 | 4  | 2751 |
|    | 3035 26478 26194 8e-92 344   |                |       |     |    |    |      |
| gi | 33285929 gb AY223844.1       | AAGE02011619.1 | 88.54 | 288 | 28 | 5  | 2751 |
|    | 3035 137385 137100 8e-92 344 |                |       |     |    |    |      |
| gi | 33285929 gb AY223844.1       | AAGE02011619.1 | 88.75 | 240 | 23 | 4  | 2755 |
|    | 2990 91009 90770 1e-75 291   |                |       |     |    |    |      |
| gi | 33285929 gb AY223844.1       | AAGE02011619.1 | 81.74 | 241 | 39 | 4  | 2754 |
|    | 2990 50489 50728 2e-47 196   |                |       |     |    |    |      |
| gi | 33285929 gb AY223844.1       | AAGE02009717.1 | 88.77 | 285 | 27 | 5  | 2754 |
|    | 3035 48613 48331 8e-92 344   |                |       |     |    |    |      |
| gi | 33285929 gb AY223844.1       | AAGE02009717.1 | 82.85 | 239 | 18 | 13 | 2755 |
|    | 2990 34871 35089 3e-46 193   |                |       |     |    |    |      |
| gi | 33285929 gb AY223844.1       | AAGE02005154.1 | 88.77 | 285 | 27 | 5  | 2754 |
|    | 3035 24459 24177 8e-92 344   |                |       |     |    |    |      |
| gi | 33285929 gb AY223844.1       | AAGE02005154.1 | 96.97 | 33  | 1  | 0  | 3177 |
|    | 3209 48716 48684 4e-05 56.5  |                |       |     |    |    |      |
| gi | 33285929 gb AY223844.1       | AAGE02004955.1 | 88.36 | 292 | 26 | 8  | 2747 |
|    | 3035 70644 70358 8e-92 344   |                |       |     |    |    |      |
| gi | 33285929 gb AY223844.1       | AAGE02004955.1 | 83.33 | 168 | 25 | 2  | 2759 |
|    | 2923 123142 122975 5e-34 152 |                |       |     |    |    |      |
| gi | 33285929 gb AY223844.1       | AAGE02003142.1 | 88.54 | 288 | 28 | 5  | 2751 |
|    | 3035 9731 10016 8e-92 344    |                |       |     |    |    |      |
| gi | 33285929 gb AY223844.1       | AAGE02003142.1 | 85.46 | 282 | 37 | 4  | 2757 |
|    | 3035 3774 4054 1e-75 291     |                |       |     |    |    |      |
| gi | 33285929 gb AY223844.1       | AAGE02001789.1 | 88.77 | 285 | 27 | 5  | 2754 |
|    | 3035 79729 80011 8e-92 344   |                |       |     |    |    |      |
| gi | 33285929 gb AY223844.1       | AAGE02001789.1 | 88.58 | 219 | 19 | 5  | 2761 |
|    | 2974 14091 14308 8e-67 261   |                |       |     |    |    |      |
| gi | 33285929 gb AY223844.1       | AAGE02001789.1 | 83.66 | 202 | 30 | 3  | 2776 |
|    | 2974 18981 18780 1e-44 187   |                |       |     |    |    |      |

|    |                              |                |       |     |    |   |      |
|----|------------------------------|----------------|-------|-----|----|---|------|
| gi | 33285929 gb AY223844.1       | AAGE02001713.1 | 89.01 | 282 | 26 | 5 | 2757 |
|    | 3035 12523 12802 8e-92 344   |                |       |     |    |   |      |
| gi | 33285929 gb AY223844.1       | AAGE02001713.1 | 85.84 | 113 | 15 | 1 | 2879 |
|    | 2990 13127 13015 5e-24 119   |                |       |     |    |   |      |
| gi | 33285929 gb AY223844.1       | AAGE02027956.1 | 88.73 | 284 | 27 | 5 | 2755 |
|    | 3035 54435 54716 3e-91 342   |                |       |     |    |   |      |
| gi | 33285929 gb AY223844.1       | AAGE02027956.1 | 85.82 | 282 | 37 | 3 | 2756 |
|    | 3035 14511 14231 2e-77 296   |                |       |     |    |   |      |
| gi | 33285929 gb AY223844.1       | AAGE02026754.1 | 88.73 | 284 | 27 | 5 | 2755 |
|    | 3035 3578 3297 3e-91 342     |                |       |     |    |   |      |
| gi | 33285929 gb AY223844.1       | AAGE02025616.1 | 87.50 | 304 | 29 | 9 | 2748 |
|    | 3046 440 141 3e-91 342       |                |       |     |    |   |      |
| gi | 33285929 gb AY223844.1       | AAGE02024055.1 | 88.28 | 290 | 29 | 5 | 2756 |
|    | 3042 25848 26135 3e-91 342   |                |       |     |    |   |      |
| gi | 33285929 gb AY223844.1       | AAGE02020267.1 | 88.73 | 284 | 27 | 5 | 2755 |
|    | 3035 2138 2419 3e-91 342     |                |       |     |    |   |      |
| gi | 33285929 gb AY223844.1       | AAGE02016623.1 | 88.54 | 288 | 25 | 8 | 2751 |
|    | 3035 108550 108268 3e-91 342 |                |       |     |    |   |      |
| gi | 33285929 gb AY223844.1       | AAGE02016623.1 | 86.82 | 220 | 23 | 5 | 2757 |
|    | 2972 117194 117411 1e-60 241 |                |       |     |    |   |      |
| gi | 33285929 gb AY223844.1       | AAGE02012556.1 | 88.50 | 287 | 28 | 5 | 2752 |
|    | 3035 118740 119024 3e-91 342 |                |       |     |    |   |      |
| gi | 33285929 gb AY223844.1       | AAGE02012556.1 | 86.93 | 283 | 34 | 3 | 2755 |
|    | 3035 46724 46443 6e-83 315   |                |       |     |    |   |      |
| gi | 33285929 gb AY223844.1       | AAGE02012556.1 | 85.48 | 186 | 21 | 5 | 2758 |
|    | 2937 104432 104617 4e-45 189 |                |       |     |    |   |      |
| gi | 33285929 gb AY223844.1       | AAGE02012328.1 | 88.73 | 284 | 26 | 6 | 2759 |
|    | 3038 105464 105745 3e-91 342 |                |       |     |    |   |      |
| gi | 33285929 gb AY223844.1       | AAGE02010597.1 | 88.73 | 284 | 26 | 6 | 2759 |
|    | 3038 5590 5309 3e-91 342     |                |       |     |    |   |      |
| gi | 33285929 gb AY223844.1       | AAGE02007908.1 | 88.73 | 284 | 26 | 6 | 2759 |
|    | 3038 109176 109457 3e-91 342 |                |       |     |    |   |      |
| gi | 33285929 gb AY223844.1       | AAGE02007010.1 | 88.54 | 288 | 26 | 7 | 2752 |
|    | 3035 16329 16613 3e-91 342   |                |       |     |    |   |      |
| gi | 33285929 gb AY223844.1       | AAGE02007010.1 | 85.34 | 191 | 24 | 3 | 2762 |
|    | 2949 23901 24090 8e-47 195   |                |       |     |    |   |      |
| gi | 33285929 gb AY223844.1       | AAGE02006764.1 | 88.28 | 290 | 29 | 5 | 2749 |
|    | 3035 14580 14293 3e-91 342   |                |       |     |    |   |      |
| gi | 33285929 gb AY223844.1       | AAGE02006145.1 | 88.73 | 284 | 26 | 6 | 2759 |
|    | 3038 71551 71832 3e-91 342   |                |       |     |    |   |      |
| gi | 33285929 gb AY223844.1       | AAGE02006145.1 | 86.32 | 190 | 18 | 8 | 2809 |
|    | 2990 6712 6523 2e-48 200     |                |       |     |    |   |      |
| gi | 33285929 gb AY223844.1       | AAGE02003709.1 | 88.73 | 284 | 26 | 6 | 2759 |
|    | 3038 18735 19016 3e-91 342   |                |       |     |    |   |      |
| gi | 33285929 gb AY223844.1       | AAGE02003709.1 | 88.84 | 242 | 21 | 6 | 2755 |
|    | 2990 40273 40514 3e-76 292   |                |       |     |    |   |      |
| gi | 33285929 gb AY223844.1       | AAGE02003709.1 | 97.22 | 36  | 1  | 0 | 3173 |
|    | 3208 20789 20754 9e-07 62.1  |                |       |     |    |   |      |
| gi | 33285929 gb AY223844.1       | AAGE02003030.1 | 88.50 | 287 | 28 | 5 | 2752 |
|    | 3035 47339 47055 3e-91 342   |                |       |     |    |   |      |
| gi | 33285929 gb AY223844.1       | AAGE02003030.1 | 86.70 | 233 | 25 | 6 | 2764 |
|    | 2990 49247 49015 1e-64 254   |                |       |     |    |   |      |

|                           |                |       |     |    |   |      |
|---------------------------|----------------|-------|-----|----|---|------|
| gi 33285929 gb AY223844.1 | AAGE02003030.1 | 85.06 | 241 | 22 | 9 | 2757 |
| 2990 124818 124585        | 2e-58 233      |       |     |    |   |      |
| gi 33285929 gb AY223844.1 | AAGE02000741.1 | 87.01 | 308 | 35 | 5 | 2742 |
| 3046 212351 212046        | 3e-91 342      |       |     |    |   |      |
| gi 33285929 gb AY223844.1 | AAGE02000741.1 | 88.98 | 245 | 22 | 4 | 2751 |
| 2990 105256 105012        | 6e-78 298      |       |     |    |   |      |
| gi 33285929 gb AY223844.1 | AAGE02000741.1 | 86.42 | 243 | 28 | 4 | 2753 |
| 2990 229261 229019        | 8e-67 261      |       |     |    |   |      |
| gi 33285929 gb AY223844.1 | AAGE02000741.1 | 85.29 | 238 | 21 | 9 | 2756 |
| 2990 11879 12105          | 2e-58 233      |       |     |    |   |      |
| gi 33285929 gb AY223844.1 | AAGE02000741.1 | 85.47 | 172 | 22 | 3 | 2757 |
| 2925 186452 186281        | 3e-41 176      |       |     |    |   |      |
| gi 33285929 gb AY223844.1 | AAGE02000741.1 | 84.62 | 169 | 14 | 7 | 2823 |
| 2990 15096 15253          | 1e-35 158      |       |     |    |   |      |
| gi 33285929 gb AY223844.1 | AAGE02000741.1 | 84.47 | 103 | 13 | 3 | 2897 |
| 2997 44870 44971          | 7e-18 99.0     |       |     |    |   |      |
| gi 33285929 gb AY223844.1 | AAGE02000741.1 | 91.30 | 46  | 3  | 1 | 2946 |
| 2990 186281 186236        | 9e-07 62.1     |       |     |    |   |      |
| gi 33285929 gb AY223844.1 | AAGE02018961.1 | 88.24 | 289 | 28 | 6 | 2751 |
| 3035 26349 26635          | 1e-90 340      |       |     |    |   |      |
| gi 33285929 gb AY223844.1 | AAGE02018961.1 | 84.89 | 278 | 35 | 5 | 2760 |
| 3035 17315 17043          | 1e-70 274      |       |     |    |   |      |
| gi 33285929 gb AY223844.1 | AAGE02009767.1 | 88.46 | 286 | 28 | 5 | 2753 |
| 3035 21550 21267          | 1e-90 340      |       |     |    |   |      |
| gi 33285929 gb AY223844.1 | AAGE02008899.1 | 87.58 | 298 | 31 | 6 | 2751 |
| 3045 141174 141468        | 1e-90 340      |       |     |    |   |      |
| gi 33285929 gb AY223844.1 | AAGE02008899.1 | 87.63 | 283 | 32 | 3 | 2755 |
| 3035 160769 160488        | 3e-86 326      |       |     |    |   |      |
| gi 33285929 gb AY223844.1 | AAGE02008899.1 | 89.75 | 244 | 19 | 6 | 2753 |
| 2990 134185 134428        | 1e-80 307      |       |     |    |   |      |
| gi 33285929 gb AY223844.1 | AAGE02008899.1 | 84.21 | 209 | 28 | 4 | 2757 |
| 2961 181928 182135        | 6e-48 198      |       |     |    |   |      |
| gi 33285929 gb AY223844.1 | AAGE02008899.1 | 85.79 | 190 | 20 | 5 | 2769 |
| 2953 100997 101184        | 8e-47 195      |       |     |    |   |      |
| gi 33285929 gb AY223844.1 | AAGE02008899.1 | 85.05 | 107 | 15 | 1 | 2883 |
| 2988 38139 38033          | 1e-20 108      |       |     |    |   |      |
| gi 33285929 gb AY223844.1 | AAGE02006595.1 | 88.24 | 289 | 28 | 6 | 2751 |
| 3036 61918 62203          | 1e-90 340      |       |     |    |   |      |
| gi 33285929 gb AY223844.1 | AAGE02006595.1 | 89.50 | 219 | 18 | 5 | 2777 |
| 2990 66011 65793          | 4e-70 272      |       |     |    |   |      |
| gi 33285929 gb AY223844.1 | AAGE02003055.1 | 88.19 | 288 | 31 | 3 | 2750 |
| 3035 19175 18889          | 1e-90 340      |       |     |    |   |      |
| gi 33285929 gb AY223844.1 | AAGE02000397.1 | 88.46 | 286 | 28 | 5 | 2753 |
| 3035 215999 215716        | 1e-90 340      |       |     |    |   |      |
| gi 33285929 gb AY223844.1 | AAGE02000397.1 | 87.15 | 288 | 31 | 6 | 2758 |
| 3041 204637 204352        | 4e-85 322      |       |     |    |   |      |
| gi 33285929 gb AY223844.1 | AAGE02000397.1 | 85.77 | 281 | 35 | 5 | 2759 |
| 3035 5215 5494            | 3e-76 292      |       |     |    |   |      |
| gi 33285929 gb AY223844.1 | AAGE02000397.1 | 87.98 | 233 | 22 | 6 | 2761 |
| 2987 1750 1982            | 1e-69 270      |       |     |    |   |      |
| gi 33285929 gb AY223844.1 | AAGE02000397.1 | 87.56 | 225 | 25 | 3 | 2770 |
| 2992 83917 84140          | 1e-65 257      |       |     |    |   |      |

|    |                        |                |       |     |    |    |      |
|----|------------------------|----------------|-------|-----|----|----|------|
| gi | 33285929 gb AY223844.1 | AAGE02000397.1 | 86.13 | 238 | 25 | 8  | 2759 |
|    | 2990 181242 181007     | 2e-63 250      |       |     |    |    |      |
| gi | 33285929 gb AY223844.1 | AAGE02000397.1 | 85.48 | 241 | 20 | 13 | 2758 |
|    | 2990 31977 32210       | 1e-59 237      |       |     |    |    |      |
| gi | 33285929 gb AY223844.1 | AAGE02000397.1 | 84.65 | 241 | 28 | 7  | 2754 |
|    | 2989 208132 208368     | 6e-58 231      |       |     |    |    |      |
| gi | 33285929 gb AY223844.1 | AAGE02000397.1 | 83.58 | 201 | 17 | 9  | 2797 |
|    | 2990 53481 53672       | 1e-40 174      |       |     |    |    |      |
| gi | 33285929 gb AY223844.1 | AAGE02000397.1 | 86.54 | 156 | 17 | 4  | 2839 |
|    | 2990 117731 117886     | 5e-39 169      |       |     |    |    |      |
| gi | 33285929 gb AY223844.1 | AAGE02000397.1 | 83.93 | 168 | 23 | 4  | 2827 |
|    | 2990 233753 233586     | 1e-35 158      |       |     |    |    |      |
| gi | 33285929 gb AY223844.1 | AAGE02000173.1 | 88.24 | 289 | 29 | 5  | 2751 |
|    | 3036 67874 68160       | 1e-90 340      |       |     |    |    |      |
| gi | 33285929 gb AY223844.1 | AAGE02000173.1 | 86.31 | 241 | 27 | 6  | 2757 |
|    | 2991 11468 11228       | 1e-65 257      |       |     |    |    |      |
| gi | 33285929 gb AY223844.1 | AAGE02000173.1 | 83.97 | 237 | 19 | 10 | 2760 |
|    | 2990 72851 73074       | 3e-51 209      |       |     |    |    |      |
| gi | 33285929 gb AY223844.1 | AAGE02000173.1 | 91.13 | 124 | 9  | 2  | 2868 |
|    | 2989 48954 48831       | 2e-38 167      |       |     |    |    |      |
| gi | 33285929 gb AY223844.1 | AAGE02033019.1 | 88.65 | 282 | 27 | 5  | 2757 |
|    | 3035 3785 4064         | 4e-90 339      |       |     |    |    |      |
| gi | 33285929 gb AY223844.1 | AAGE02027947.1 | 88.42 | 285 | 27 | 6  | 2758 |
|    | 3038 56010 56292       | 4e-90 339      |       |     |    |    |      |
| gi | 33285929 gb AY223844.1 | AAGE02027947.1 | 88.21 | 246 | 22 | 7  | 2751 |
|    | 2990 46407 46651       | 1e-74 287      |       |     |    |    |      |
| gi | 33285929 gb AY223844.1 | AAGE02027947.1 | 88.89 | 135 | 15 | 0  | 2904 |
|    | 3038 61173 61307       | 2e-38 167      |       |     |    |    |      |
| gi | 33285929 gb AY223844.1 | AAGE02023300.1 | 88.19 | 288 | 28 | 6  | 2751 |
|    | 3035 67054 67338       | 4e-90 339      |       |     |    |    |      |
| gi | 33285929 gb AY223844.1 | AAGE02019107.1 | 88.19 | 288 | 29 | 5  | 2751 |
|    | 3035 301 16            | 4e-90 339      |       |     |    |    |      |
| gi | 33285929 gb AY223844.1 | AAGE02019107.1 | 83.57 | 213 | 25 | 8  | 2781 |
|    | 2990 52668 52463       | 1e-45 191      |       |     |    |    |      |
| gi | 33285929 gb AY223844.1 | AAGE02018191.1 | 88.19 | 288 | 29 | 5  | 2751 |
|    | 3035 12740 13025       | 4e-90 339      |       |     |    |    |      |
| gi | 33285929 gb AY223844.1 | AAGE02018191.1 | 83.33 | 282 | 31 | 6  | 2757 |
|    | 3035 14965 15233       | 2e-62 246      |       |     |    |    |      |
| gi | 33285929 gb AY223844.1 | AAGE02018191.1 | 85.23 | 176 | 21 | 4  | 2752 |
|    | 2922 14243 14418       | 3e-41 176      |       |     |    |    |      |
| gi | 33285929 gb AY223844.1 | AAGE02018034.1 | 88.15 | 287 | 31 | 3  | 2751 |
|    | 3035 37376 37661       | 4e-90 339      |       |     |    |    |      |
| gi | 33285929 gb AY223844.1 | AAGE02018034.1 | 89.54 | 239 | 19 | 6  | 2757 |
|    | 2989 61030 60792       | 6e-78 298      |       |     |    |    |      |
| gi | 33285929 gb AY223844.1 | AAGE02017350.1 | 88.19 | 288 | 29 | 5  | 2751 |
|    | 3035 6479 6764         | 4e-90 339      |       |     |    |    |      |
| gi | 33285929 gb AY223844.1 | AAGE02015586.1 | 88.42 | 285 | 28 | 5  | 2754 |
|    | 3035 153204 152922     | 4e-90 339      |       |     |    |    |      |
| gi | 33285929 gb AY223844.1 | AAGE02015586.1 | 86.57 | 283 | 34 | 4  | 2756 |
|    | 3035 166492 166211     | 3e-81 309      |       |     |    |    |      |
| gi | 33285929 gb AY223844.1 | AAGE02015586.1 | 85.47 | 289 | 36 | 5  | 2752 |
|    | 3035 52839 53126       | 2e-77 296      |       |     |    |    |      |



|                              |                |       |     |    |   |      |
|------------------------------|----------------|-------|-----|----|---|------|
| gi 33285929 gb AY223844.1    | AAGE02015586.1 | 85.83 | 247 | 28 | 6 | 2749 |
| 2989 24740 24495 4e-65 255   |                |       |     |    |   |      |
| gi 33285929 gb AY223844.1    | AAGE02015586.1 | 84.30 | 242 | 20 | 8 | 2761 |
| 2997 12764 12536 1e-54 220   |                |       |     |    |   |      |
| gi 33285929 gb AY223844.1    | AAGE02015586.1 | 83.40 | 241 | 31 | 6 | 2759 |
| 2990 92333 92573 6e-53 215   |                |       |     |    |   |      |
| gi 33285929 gb AY223844.1    | AAGE02015586.1 | 86.36 | 154 | 17 | 4 | 2841 |
| 2990 160337 160490 7e-38 165 |                |       |     |    |   |      |
| gi 33285929 gb AY223844.1    | AAGE02014382.1 | 88.19 | 288 | 28 | 6 | 2752 |
| 3035 113029 113314 4e-90 339 |                |       |     |    |   |      |
| gi 33285929 gb AY223844.1    | AAGE02014382.1 | 87.29 | 236 | 23 | 6 | 2760 |
| 2990 125522 125755 2e-67 263 |                |       |     |    |   |      |
| gi 33285929 gb AY223844.1    | AAGE02014382.1 | 86.43 | 221 | 25 | 5 | 2775 |
| 2990 49422 49642 1e-59 237   |                |       |     |    |   |      |
| gi 33285929 gb AY223844.1    | AAGE02012236.1 | 88.93 | 280 | 24 | 7 | 2760 |
| 3035 173654 173930 4e-90 339 |                |       |     |    |   |      |
| gi 33285929 gb AY223844.1    | AAGE02012236.1 | 86.32 | 285 | 35 | 4 | 2754 |
| 3035 83479 83762 1e-80 307   |                |       |     |    |   |      |
| gi 33285929 gb AY223844.1    | AAGE02012236.1 | 86.31 | 241 | 26 | 6 | 2755 |
| 2990 210713 210951 4e-65 255 |                |       |     |    |   |      |
| gi 33285929 gb AY223844.1    | AAGE02007028.1 | 88.38 | 284 | 29 | 4 | 2755 |
| 3035 29233 28951 4e-90 339   |                |       |     |    |   |      |
| gi 33285929 gb AY223844.1    | AAGE02001106.1 | 87.42 | 302 | 28 | 9 | 2739 |
| 3035 76484 76188 4e-90 339   |                |       |     |    |   |      |
| gi 33285929 gb AY223844.1    | AAGE02001106.1 | 87.46 | 287 | 33 | 3 | 2751 |
| 3035 53824 54109 8e-87 327   |                |       |     |    |   |      |
| gi 33285929 gb AY223844.1    | AAGE02001106.1 | 85.29 | 238 | 29 | 6 | 2758 |
| 2990 22365 22129 1e-60 241   |                |       |     |    |   |      |
| gi 33285929 gb AY223844.1    | AAGE02030305.1 | 88.61 | 281 | 27 | 5 | 2756 |
| 3033 14745 15023 1e-89 337   |                |       |     |    |   |      |
| gi 33285929 gb AY223844.1    | AAGE02025626.1 | 88.38 | 284 | 27 | 6 | 2759 |
| 3038 2372 2091 1e-89 337     |                |       |     |    |   |      |
| gi 33285929 gb AY223844.1    | AAGE02025256.1 | 87.93 | 290 | 29 | 6 | 2753 |
| 3038 3347 3634 1e-89 337     |                |       |     |    |   |      |
| gi 33285929 gb AY223844.1    | AAGE02022773.1 | 87.93 | 290 | 29 | 6 | 2753 |
| 3038 80632 80919 1e-89 337   |                |       |     |    |   |      |
| gi 33285929 gb AY223844.1    | AAGE02022773.1 | 85.31 | 245 | 30 | 6 | 2752 |
| 2990 141413 141657 6e-63 248 |                |       |     |    |   |      |
| gi 33285929 gb AY223844.1    | AAGE02022773.1 | 83.97 | 237 | 29 | 9 | 2760 |
| 2990 124751 124984 5e-54 219 |                |       |     |    |   |      |
| gi 33285929 gb AY223844.1    | AAGE02019643.1 | 88.15 | 287 | 29 | 5 | 2751 |
| 3034 84032 83748 1e-89 337   |                |       |     |    |   |      |
| gi 33285929 gb AY223844.1    | AAGE02019643.1 | 87.24 | 243 | 21 | 8 | 2758 |
| 2990 116237 115995 5e-69 268 |                |       |     |    |   |      |
| gi 33285929 gb AY223844.1    | AAGE02019340.1 | 88.38 | 284 | 27 | 6 | 2759 |
| 3038 33856 34137 1e-89 337   |                |       |     |    |   |      |
| gi 33285929 gb AY223844.1    | AAGE02019340.1 | 93.48 | 92  | 6  | 0 | 2761 |
| 2852 67434 67525 1e-29 137   |                |       |     |    |   |      |
| gi 33285929 gb AY223844.1    | AAGE02017862.1 | 88.38 | 284 | 27 | 6 | 2759 |
| 3038 7600 7881 1e-89 337     |                |       |     |    |   |      |
| gi 33285929 gb AY223844.1    | AAGE02017556.1 | 88.38 | 284 | 27 | 6 | 2759 |
| 3038 88132 88413 1e-89 337   |                |       |     |    |   |      |

|    |                              |                |       |     |    |   |      |
|----|------------------------------|----------------|-------|-----|----|---|------|
| gi | 33285929 gb AY223844.1       | AAGE02017556.1 | 91.39 | 244 | 17 | 3 | 2751 |
|    | 2990 20631 20874 6e-88 331   |                |       |     |    |   |      |
| gi | 33285929 gb AY223844.1       | AAGE02017556.1 | 85.07 | 221 | 26 | 7 | 2775 |
|    | 2990 136075 135857 5e-54 219 |                |       |     |    |   |      |
| gi | 33285929 gb AY223844.1       | AAGE02017118.1 | 88.15 | 287 | 29 | 5 | 2752 |
|    | 3035 26999 27283 1e-89 337   |                |       |     |    |   |      |
| gi | 33285929 gb AY223844.1       | AAGE02017118.1 | 86.61 | 239 | 27 | 5 | 2757 |
|    | 2990 121290 121528 3e-66 259 |                |       |     |    |   |      |
| gi | 33285929 gb AY223844.1       | AAGE02016827.1 | 88.38 | 284 | 28 | 5 | 2755 |
|    | 3035 30572 30291 1e-89 337   |                |       |     |    |   |      |
| gi | 33285929 gb AY223844.1       | AAGE02016697.1 | 88.38 | 284 | 27 | 6 | 2759 |
|    | 3038 2735 3016 1e-89 337     |                |       |     |    |   |      |
| gi | 33285929 gb AY223844.1       | AAGE02015978.1 | 87.13 | 303 | 32 | 6 | 2743 |
|    | 3040 63902 63602 1e-89 337   |                |       |     |    |   |      |
| gi | 33285929 gb AY223844.1       | AAGE02015978.1 | 87.79 | 172 | 17 | 4 | 2823 |
|    | 2990 7061 6890 6e-48 198     |                |       |     |    |   |      |
| gi | 33285929 gb AY223844.1       | AAGE02015797.1 | 88.38 | 284 | 27 | 6 | 2759 |
|    | 3038 304079 304360 1e-89 337 |                |       |     |    |   |      |
| gi | 33285929 gb AY223844.1       | AAGE02015797.1 | 85.61 | 285 | 36 | 5 | 2754 |
|    | 3035 491557 491839 8e-77 294 |                |       |     |    |   |      |
| gi | 33285929 gb AY223844.1       | AAGE02015797.1 | 87.14 | 210 | 24 | 2 | 2756 |
|    | 2962 164629 164420 5e-59 235 |                |       |     |    |   |      |
| gi | 33285929 gb AY223844.1       | AAGE02015797.1 | 84.06 | 251 | 33 | 6 | 2753 |
|    | 2997 422433 422682 5e-59 235 |                |       |     |    |   |      |
| gi | 33285929 gb AY223844.1       | AAGE02015797.1 | 84.92 | 199 | 24 | 4 | 2795 |
|    | 2989 493112 492916 2e-47 196 |                |       |     |    |   |      |
| gi | 33285929 gb AY223844.1       | AAGE02015797.1 | 79.34 | 242 | 39 | 8 | 2753 |
|    | 2990 225623 225389 3e-36 159 |                |       |     |    |   |      |
| gi | 33285929 gb AY223844.1       | AAGE02015797.1 | 94.03 | 67  | 3  | 1 | 2751 |
|    | 2817 111573 111508 2e-18 100 |                |       |     |    |   |      |
| gi | 33285929 gb AY223844.1       | AAGE02015321.1 | 87.93 | 290 | 29 | 6 | 2754 |
|    | 3039 20898 21185 1e-89 337   |                |       |     |    |   |      |
| gi | 33285929 gb AY223844.1       | AAGE02014388.1 | 87.93 | 290 | 30 | 5 | 2749 |
|    | 3035 491010 491297 1e-89 337 |                |       |     |    |   |      |
| gi | 33285929 gb AY223844.1       | AAGE02014388.1 | 87.19 | 281 | 31 | 5 | 2758 |
|    | 3035 99288 99010 6e-83 315   |                |       |     |    |   |      |
| gi | 33285929 gb AY223844.1       | AAGE02014388.1 | 87.82 | 238 | 24 | 5 | 2757 |
|    | 2989 349632 349869 1e-70 274 |                |       |     |    |   |      |
| gi | 33285929 gb AY223844.1       | AAGE02014388.1 | 85.51 | 214 | 27 | 3 | 2752 |
|    | 2961 279750 279963 1e-54 220 |                |       |     |    |   |      |
| gi | 33285929 gb AY223844.1       | AAGE02014388.1 | 83.26 | 227 | 25 | 9 | 2759 |
|    | 2980 132202 131984 2e-47 196 |                |       |     |    |   |      |
| gi | 33285929 gb AY223844.1       | AAGE02014388.1 | 82.69 | 156 | 17 | 6 | 2839 |
|    | 2990 521455 521306 2e-27 130 |                |       |     |    |   |      |
| gi | 33285929 gb AY223844.1       | AAGE02014388.1 | 82.88 | 146 | 22 | 3 | 2758 |
|    | 2900 360511 360656 9e-27 128 |                |       |     |    |   |      |
| gi | 33285929 gb AY223844.1       | AAGE02014388.1 | 90.11 | 91  | 9  | 0 | 2751 |
|    | 2841 468415 468325 5e-24 119 |                |       |     |    |   |      |
| gi | 33285929 gb AY223844.1       | AAGE02012796.1 | 87.93 | 290 | 29 | 6 | 2751 |
|    | 3036 4331 4618 1e-89 337     |                |       |     |    |   |      |
| gi | 33285929 gb AY223844.1       | AAGE02009544.1 | 88.65 | 282 | 25 | 7 | 2758 |
|    | 3035 4057 4335 1e-89 337     |                |       |     |    |   |      |

|                                  |                |        |     |    |    |      |
|----------------------------------|----------------|--------|-----|----|----|------|
| gi 33285929 gb AY223844.1        | AAGE02009544.1 | 86.92  | 237 | 25 | 6  | 2760 |
| 2990 1002 1238 8e-67 261         |                |        |     |    |    |      |
| gi 33285929 gb AY223844.1        | AAGE02008981.1 | 88.15  | 287 | 29 | 5  | 2751 |
| 3034 40034 40318 1e-89 337       |                |        |     |    |    |      |
| gi 33285929 gb AY223844.1        | AAGE02008981.1 | 85.29  | 238 | 31 | 4  | 2757 |
| 2990 195041 194804 3e-61 243     |                |        |     |    |    |      |
| gi 33285929 gb AY223844.1        | AAGE02008981.1 | 86.16  | 224 | 26 | 5  | 2769 |
| 2987 143382 143159 1e-59 237     |                |        |     |    |    |      |
| gi 33285929 gb AY223844.1        | AAGE02008981.1 | 97.14  | 35  | 1  | 0  | 3174 |
| 3208 173348 173314 3e-06 60.2    |                |        |     |    |    |      |
| gi 33285929 gb AY223844.1        | AAGE02008928.1 | 88.15  | 287 | 29 | 5  | 2749 |
| 3033 66185 66468 1e-89 337       |                |        |     |    |    |      |
| gi 33285929 gb AY223844.1        | AAGE02008928.1 | 86.27  | 284 | 32 | 7  | 2756 |
| 3035 100193 100473 5e-79 302     |                |        |     |    |    |      |
| gi 33285929 gb AY223844.1        | AAGE02008928.1 | 84.93  | 292 | 37 | 5  | 2750 |
| 3035 21142 20852 4e-75 289       |                |        |     |    |    |      |
| gi 33285929 gb AY223844.1        | AAGE02008928.1 | 87.70  | 244 | 23 | 7  | 2751 |
| 2988 86006 85764 8e-72 278       |                |        |     |    |    |      |
| gi 33285929 gb AY223844.1        | AAGE02006555.1 | 88.61  | 281 | 27 | 5  | 2758 |
| 3035 7707 7985 1e-89 337         |                |        |     |    |    |      |
| gi 33285929 gb AY223844.1        | AAGE02003413.1 | 88.11  | 286 | 31 | 3  | 2752 |
| 3035 19034 18750 1e-89 337       |                |        |     |    |    |      |
| gi 33285929 gb AY223844.1        | AAGE02000237.1 | 88.15  | 287 | 29 | 5  | 2752 |
| 3035 7858 8142 1e-89 337         |                |        |     |    |    |      |
| gi 33285929 gb AY223844.1        | AAGE02024932.1 | 87.89  | 289 | 30 | 5  | 2750 |
| 3035 22185 22471 5e-89 335       |                |        |     |    |    |      |
| gi 33285929 gb AY223844.1        | AAGE02019279.1 | 88.15  | 287 | 27 | 7  | 2754 |
| 3035 4425 4709 5e-89 335         |                |        |     |    |    |      |
| gi 33285929 gb AY223844.1        | AAGE02015423.1 | 88.34  | 283 | 28 | 5  | 2756 |
| 3035 208169 208449 5e-89 335     |                |        |     |    |    |      |
| gi 33285929 gb AY223844.1        | AAGE02015423.1 | 88.66  | 238 | 23 | 4  | 2757 |
| 2990 210616 210853 1e-74 287     |                |        |     |    |    |      |
| gi 33285929 gb AY223844.1        | AAGE02015423.1 | 84.62  | 286 | 40 | 4  | 2750 |
| 3032 350929 350645 6e-73 281     |                |        |     |    |    |      |
| gi 33285929 gb AY223844.1        | AAGE02015423.1 | 88.19  | 237 | 22 | 6  | 2759 |
| 2990 88367 88602 8e-72 278       |                |        |     |    |    |      |
| gi 33285929 gb AY223844.1        | AAGE02015423.1 | 86.25  | 240 | 26 | 7  | 2758 |
| 2990 3701 3940 1e-64 254         |                |        |     |    |    |      |
| gi 33285929 gb AY223844.1        | AAGE02013686.1 | 88.07  | 285 | 30 | 4  | 2754 |
| 3035 130826 130543 5e-89 335     |                |        |     |    |    |      |
| gi 33285929 gb AY223844.1        | AAGE02013686.1 | 87.92  | 240 | 23 | 6  | 2757 |
| 2990 116725 116964 8e-72 278     |                |        |     |    |    |      |
| gi 33285929 gb AY223844.1        | AAGE02013686.1 | 87.71  | 236 | 24 | 4  | 2760 |
| 2990 78805 79040 1e-69 270       |                |        |     |    |    |      |
| gi 33285929 gb AY223844.1        | AAGE02013686.1 | 85.04  | 234 | 21 | 11 | 2760 |
| 2988 117551 117327 3e-56 226     |                |        |     |    |    |      |
| gi 33285929 gb AY223844.1        | AAGE02013686.1 | 100.00 |     | 31 | 0  | 0    |
| 2941 2971 30152 30122 1e-05 58.4 |                |        |     |    |    |      |
| gi 33285929 gb AY223844.1        | AAGE02009977.1 | 87.63  | 291 | 32 | 4  | 2751 |
| 3038 96814 97103 5e-89 335       |                |        |     |    |    |      |
| gi 33285929 gb AY223844.1        | AAGE02009977.1 | 88.89  | 243 | 21 | 6  | 2753 |
| 2989 16061 15819 8e-77 294       |                |        |     |    |    |      |

|    |                               |                |       |     |    |    |      |
|----|-------------------------------|----------------|-------|-----|----|----|------|
| gi | 33285929 gb AY223844.1        | AAGE02008468.1 | 88.11 | 286 | 28 | 6  | 2756 |
|    | 3037 6214 5931 5e-89 335      |                |       |     |    |    |      |
| gi | 33285929 gb AY223844.1        | AAGE02008468.1 | 86.50 | 237 | 20 | 8  | 2760 |
|    | 2990 80592 80362 2e-63 250    |                |       |     |    |    |      |
| gi | 33285929 gb AY223844.1        | AAGE02006466.1 | 88.34 | 283 | 28 | 5  | 2756 |
|    | 3035 10517 10797 5e-89 335    |                |       |     |    |    |      |
| gi | 33285929 gb AY223844.1        | AAGE02005700.1 | 88.42 | 285 | 23 | 9  | 2753 |
|    | 3032 6765 7044 5e-89 335      |                |       |     |    |    |      |
| gi | 33285929 gb AY223844.1        | AAGE02005699.1 | 88.30 | 282 | 29 | 4  | 2753 |
|    | 3032 59519 59798 5e-89 335    |                |       |     |    |    |      |
| gi | 33285929 gb AY223844.1        | AAGE02005699.1 | 84.27 | 248 | 28 | 5  | 2751 |
|    | 2990 48746 48990 6e-58 231    |                |       |     |    |    |      |
| gi | 33285929 gb AY223844.1        | AAGE02005699.1 | 83.44 | 157 | 22 | 3  | 2792 |
|    | 2944 584 428 3e-31 143        |                |       |     |    |    |      |
| gi | 33285929 gb AY223844.1        | AAGE02004416.1 | 88.34 | 283 | 28 | 5  | 2756 |
|    | 3035 18893 19173 5e-89 335    |                |       |     |    |    |      |
| gi | 33285929 gb AY223844.1        | AAGE02004136.1 | 88.34 | 283 | 28 | 5  | 2756 |
|    | 3035 19550 19270 5e-89 335    |                |       |     |    |    |      |
| gi | 33285929 gb AY223844.1        | AAGE02003905.1 | 87.89 | 289 | 29 | 6  | 2751 |
|    | 3035 3048 2762 5e-89 335      |                |       |     |    |    |      |
| gi | 33285929 gb AY223844.1        | AAGE02003905.1 | 89.30 | 243 | 21 | 5  | 2751 |
|    | 2988 122602 122844 2e-78 300  |                |       |     |    |    |      |
| gi | 33285929 gb AY223844.1        | AAGE02003905.1 | 81.89 | 243 | 19 | 13 | 2756 |
|    | 2990 1947 1722 7e-43 182      |                |       |     |    |    |      |
| gi | 33285929 gb AY223844.1        | AAGE02003905.1 | 93.88 | 49  | 2  | 1  | 2943 |
|    | 2990 96367 96319 4e-10 73.1   |                |       |     |    |    |      |
| gi | 33285929 gb AY223844.1        | AAGE02002919.1 | 88.11 | 286 | 29 | 5  | 2753 |
|    | 3035 25751 26034 5e-89 335    |                |       |     |    |    |      |
| gi | 33285929 gb AY223844.1        | AAGE02002919.1 | 86.79 | 212 | 23 | 5  | 2763 |
|    | 2971 15371 15580 6e-58 231    |                |       |     |    |    |      |
| gi | 33285929 gb AY223844.1        | AAGE02002919.1 | 91.18 | 68  | 4  | 2  | 2759 |
|    | 2825 106040 106106 1e-15 91.6 |                |       |     |    |    |      |
| gi | 33285929 gb AY223844.1        | AAGE02025207.1 | 88.30 | 282 | 28 | 5  | 2757 |
|    | 3035 15892 16171 2e-88 333    |                |       |     |    |    |      |
| gi | 33285929 gb AY223844.1        | AAGE02022845.1 | 87.85 | 288 | 30 | 5  | 2751 |
|    | 3035 30496 30211 2e-88 333    |                |       |     |    |    |      |
| gi | 33285929 gb AY223844.1        | AAGE02022250.1 | 87.80 | 287 | 32 | 3  | 2751 |
|    | 3035 4750 5035 2e-88 333      |                |       |     |    |    |      |
| gi | 33285929 gb AY223844.1        | AAGE02018482.1 | 88.30 | 282 | 28 | 5  | 2757 |
|    | 3035 23316 23595 2e-88 333    |                |       |     |    |    |      |
| gi | 33285929 gb AY223844.1        | AAGE02018018.1 | 88.11 | 286 | 26 | 8  | 2752 |
|    | 3034 115524 115804 2e-88 333  |                |       |     |    |    |      |
| gi | 33285929 gb AY223844.1        | AAGE02018018.1 | 86.97 | 238 | 25 | 6  | 2759 |
|    | 2990 80882 81119 2e-67 263    |                |       |     |    |    |      |
| gi | 33285929 gb AY223844.1        | AAGE02017689.1 | 86.16 | 318 | 33 | 10 | 2738 |
|    | 3048 58616 58929 2e-88 333    |                |       |     |    |    |      |
| gi | 33285929 gb AY223844.1        | AAGE02017689.1 | 88.35 | 206 | 20 | 4  | 2752 |
|    | 2953 54388 54183 8e-62 244    |                |       |     |    |    |      |
| gi | 33285929 gb AY223844.1        | AAGE02017689.1 | 81.94 | 144 | 21 | 5  | 2755 |
|    | 2894 10343 10201 2e-23 117    |                |       |     |    |    |      |
| gi | 33285929 gb AY223844.1        | AAGE02016892.1 | 88.30 | 282 | 28 | 5  | 2757 |
|    | 3035 59519 59798 2e-88 333    |                |       |     |    |    |      |

|                           |                |        |     |    |    |      |
|---------------------------|----------------|--------|-----|----|----|------|
| gi 33285929 gb AY223844.1 | AAGE02016892.1 | 85.53  | 152 | 18 | 3  | 2757 |
| 2904 49835 49684 4e-35    | 156            |        |     |    |    |      |
| gi 33285929 gb AY223844.1 | AAGE02016477.1 | 88.03  | 284 | 31 | 3  | 2755 |
| 3036 114423 114705        | 2e-88 333      |        |     |    |    |      |
| gi 33285929 gb AY223844.1 | AAGE02013860.1 | 86.75  | 302 | 36 | 4  | 2740 |
| 3039 52488 52787 2e-88    | 333            |        |     |    |    |      |
| gi 33285929 gb AY223844.1 | AAGE02013860.1 | 80.33  | 239 | 23 | 9  | 2754 |
| 2987 20971 21190 3e-36    | 159            |        |     |    |    |      |
| gi 33285929 gb AY223844.1 | AAGE02011160.1 | 87.85  | 288 | 30 | 5  | 2751 |
| 3035 6877 7162 2e-88      | 333            |        |     |    |    |      |
| gi 33285929 gb AY223844.1 | AAGE02010971.1 | 88.07  | 285 | 29 | 5  | 2754 |
| 3035 8379 8661 2e-88      | 333            |        |     |    |    |      |
| gi 33285929 gb AY223844.1 | AAGE02010005.1 | 87.85  | 288 | 30 | 5  | 2751 |
| 3035 147116 146831        | 2e-88 333      |        |     |    |    |      |
| gi 33285929 gb AY223844.1 | AAGE02010005.1 | 85.99  | 207 | 25 | 3  | 2749 |
| 2952 108136 107931        | 5e-54 219      |        |     |    |    |      |
| gi 33285929 gb AY223844.1 | AAGE02009302.1 | 87.93  | 290 | 26 | 9  | 2751 |
| 3035 147589 147874        | 2e-88 333      |        |     |    |    |      |
| gi 33285929 gb AY223844.1 | AAGE02009302.1 | 87.80  | 246 | 23 | 7  | 2751 |
| 2990 55341 55585 6e-73    | 281            |        |     |    |    |      |
| gi 33285929 gb AY223844.1 | AAGE02009302.1 | 86.18  | 246 | 28 | 6  | 2751 |
| 2990 146328 146573        | 8e-67 261      |        |     |    |    |      |
| gi 33285929 gb AY223844.1 | AAGE02009302.1 | 83.26  | 239 | 28 | 8  | 2802 |
| 3036 1331 1561 3e-51      | 209            |        |     |    |    |      |
| gi 33285929 gb AY223844.1 | AAGE02008544.1 | 87.80  | 287 | 31 | 4  | 2751 |
| 3035 35618 35334 2e-88    | 333            |        |     |    |    |      |
| gi 33285929 gb AY223844.1 | AAGE02006950.1 | 87.89  | 289 | 28 | 6  | 2756 |
| 3039 97583 97869 2e-88    | 333            |        |     |    |    |      |
| gi 33285929 gb AY223844.1 | AAGE02006950.1 | 86.24  | 218 | 19 | 4  | 2760 |
| 2974 95398 95607 3e-56    | 226            |        |     |    |    |      |
| gi 33285929 gb AY223844.1 | AAGE02006950.1 | 86.56  | 186 | 19 | 4  | 2809 |
| 2990 89985 90168 2e-48    | 200            |        |     |    |    |      |
| gi 33285929 gb AY223844.1 | AAGE02006759.1 | 88.07  | 285 | 29 | 5  | 2754 |
| 3035 16206 15924 2e-88    | 333            |        |     |    |    |      |
| gi 33285929 gb AY223844.1 | AAGE02006759.1 | 83.47  | 242 | 26 | 10 | 2755 |
| 2990 41608 41841 2e-52    | 213            |        |     |    |    |      |
| gi 33285929 gb AY223844.1 | AAGE02006260.1 | 85.58  | 326 | 38 | 9  | 2739 |
| 3060 37272 37592 2e-88    | 333            |        |     |    |    |      |
| gi 33285929 gb AY223844.1 | AAGE02004064.1 | 88.07  | 285 | 29 | 5  | 2754 |
| 3035 151343 151625        | 2e-88 333      |        |     |    |    |      |
| gi 33285929 gb AY223844.1 | AAGE02004064.1 | 88.61  | 237 | 21 | 5  | 2760 |
| 2990 245553 245317        | 2e-73 283      |        |     |    |    |      |
| gi 33285929 gb AY223844.1 | AAGE02004064.1 | 78.64  | 220 | 25 | 13 | 2758 |
| 2974 31261 31461 3e-26    | 126            |        |     |    |    |      |
| gi 33285929 gb AY223844.1 | AAGE02004064.1 | 92.86  | 56  | 4  | 0  | 2760 |
| 2815 86359 86304 7e-13    | 82.4           |        |     |    |    |      |
| gi 33285929 gb AY223844.1 | AAGE02004064.1 | 88.89  | 63  | 6  | 1  | 2929 |
| 2990 5155 5217 3e-11      | 76.8           |        |     |    |    |      |
| gi 33285929 gb AY223844.1 | AAGE02004064.1 | 100.00 |     | 37 | 0  | 0    |
| 2923 2959 25393 25357     | 5e-09 69.4     |        |     |    |    |      |
| gi 33285929 gb AY223844.1 | AAGE02003267.1 | 88.07  | 285 | 28 | 6  | 2755 |
| 3035 46810 47092 2e-88    | 333            |        |     |    |    |      |

|    |                        |                |       |     |    |    |      |
|----|------------------------|----------------|-------|-----|----|----|------|
| gi | 33285929 gb AY223844.1 | AAGE02003267.1 | 87.92 | 240 | 22 | 6  | 2756 |
|    | 2990 102030 101793     | 3e-71 276      |       |     |    |    |      |
| gi | 33285929 gb AY223844.1 | AAGE02003267.1 | 93.27 | 104 | 6  | 1  | 2889 |
|    | 2991 35425 35322       | 5e-34 152      |       |     |    |    |      |
| gi | 33285929 gb AY223844.1 | AAGE02003267.1 | 81.40 | 172 | 24 | 5  | 2763 |
|    | 2931 86774 86608       | 2e-28 134      |       |     |    |    |      |
| gi | 33285929 gb AY223844.1 | AAGE02003267.1 | 91.30 | 46  | 4  | 0  | 2763 |
|    | 2808 116191 116236     | 2e-07 63.9     |       |     |    |    |      |
| gi | 33285929 gb AY223844.1 | AAGE02001592.1 | 87.80 | 287 | 32 | 3  | 2751 |
|    | 3035 7486 7771         | 2e-88 333      |       |     |    |    |      |
| gi | 33285929 gb AY223844.1 | AAGE02001592.1 | 88.14 | 236 | 22 | 6  | 2760 |
|    | 2990 19019 18785       | 3e-71 276      |       |     |    |    |      |
| gi | 33285929 gb AY223844.1 | AAGE02001592.1 | 86.78 | 242 | 16 | 10 | 2754 |
|    | 2989 34148 33917       | 4e-65 255      |       |     |    |    |      |
| gi | 33285929 gb AY223844.1 | AAGE02000264.1 | 87.80 | 287 | 32 | 3  | 2751 |
|    | 3035 158161 158446     | 2e-88 333      |       |     |    |    |      |
| gi | 33285929 gb AY223844.1 | AAGE02000264.1 | 85.41 | 281 | 33 | 8  | 2753 |
|    | 3027 78939 79217       | 5e-74 285      |       |     |    |    |      |
| gi | 33285929 gb AY223844.1 | AAGE02000264.1 | 85.23 | 237 | 28 | 6  | 2758 |
|    | 2990 96730 96963       | 1e-59 237      |       |     |    |    |      |
| gi | 33285929 gb AY223844.1 | AAGE02000264.1 | 84.62 | 234 | 29 | 6  | 2763 |
|    | 2990 143487 143255     | 3e-56 226      |       |     |    |    |      |
| gi | 33285929 gb AY223844.1 | AAGE02000264.1 | 81.60 | 212 | 34 | 4  | 2787 |
|    | 2994 173296 173086     | 1e-39 171      |       |     |    |    |      |
| gi | 33285929 gb AY223844.1 | AAGE02000264.1 | 89.32 | 103 | 11 | 0  | 2760 |
|    | 2862 108929 108827     | 2e-27 130      |       |     |    |    |      |
| gi | 33285929 gb AY223844.1 | AAGE02032376.1 | 88.03 | 284 | 29 | 5  | 2751 |
|    | 3031 2859 2578         | 6e-88 331      |       |     |    |    |      |
| gi | 33285929 gb AY223844.1 | AAGE02032148.1 | 87.85 | 288 | 28 | 6  | 2753 |
|    | 3035 4164 4449         | 6e-88 331      |       |     |    |    |      |
| gi | 33285929 gb AY223844.1 | AAGE02030433.1 | 87.99 | 283 | 30 | 4  | 2751 |
|    | 3031 18365 18085       | 6e-88 331      |       |     |    |    |      |
| gi | 33285929 gb AY223844.1 | AAGE02028220.1 | 87.76 | 286 | 32 | 3  | 2752 |
|    | 3035 3192 3476         | 6e-88 331      |       |     |    |    |      |
| gi | 33285929 gb AY223844.1 | AAGE02024988.1 | 88.03 | 284 | 29 | 5  | 2755 |
|    | 3035 85570 85289       | 6e-88 331      |       |     |    |    |      |
| gi | 33285929 gb AY223844.1 | AAGE02024988.1 | 88.84 | 242 | 21 | 5  | 2755 |
|    | 2990 20705 20946       | 3e-76 292      |       |     |    |    |      |
| gi | 33285929 gb AY223844.1 | AAGE02024708.1 | 86.60 | 306 | 33 | 7  | 2751 |
|    | 3053 131 431           | 6e-88 331      |       |     |    |    |      |
| gi | 33285929 gb AY223844.1 | AAGE02024578.1 | 87.76 | 286 | 31 | 4  | 2753 |
|    | 3035 46343 46627       | 6e-88 331      |       |     |    |    |      |
| gi | 33285929 gb AY223844.1 | AAGE02024578.1 | 85.14 | 222 | 25 | 8  | 2754 |
|    | 2969 48763 48544       | 1e-54 220      |       |     |    |    |      |
| gi | 33285929 gb AY223844.1 | AAGE02023133.1 | 87.76 | 286 | 32 | 3  | 2752 |
|    | 3035 2455 2739         | 6e-88 331      |       |     |    |    |      |
| gi | 33285929 gb AY223844.1 | AAGE02021278.1 | 87.76 | 286 | 32 | 3  | 2752 |
|    | 3035 17568 17852       | 6e-88 331      |       |     |    |    |      |
| gi | 33285929 gb AY223844.1 | AAGE02021278.1 | 85.79 | 197 | 23 | 4  | 2763 |
|    | 2955 25391 25586       | 1e-49 204      |       |     |    |    |      |
| gi | 33285929 gb AY223844.1 | AAGE02018609.1 | 88.03 | 284 | 29 | 5  | 2758 |
|    | 3038 13775 13494       | 6e-88 331      |       |     |    |    |      |

|    |                        |                |       |     |    |    |      |
|----|------------------------|----------------|-------|-----|----|----|------|
| gi | 33285929 gb AY223844.1 | AAGE02017909.1 | 91.43 | 245 | 16 | 5  | 2751 |
|    | 2990 244464 244708     | 6e-88 331      |       |     |    |    |      |
| gi | 33285929 gb AY223844.1 | AAGE02017909.1 | 85.04 | 234 | 31 | 3  | 2761 |
|    | 2990 122750 122517     | 5e-59 235      |       |     |    |    |      |
| gi | 33285929 gb AY223844.1 | AAGE02017909.1 | 83.15 | 178 | 22 | 5  | 2798 |
|    | 2972 9191 9019         | 4e-35 156      |       |     |    |    |      |
| gi | 33285929 gb AY223844.1 | AAGE02017909.1 | 90.72 | 97  | 8  | 1  | 2895 |
|    | 2990 111918 112014     | 9e-27 128      |       |     |    |    |      |
| gi | 33285929 gb AY223844.1 | AAGE02014466.1 | 87.76 | 286 | 32 | 3  | 2752 |
|    | 3035 52192 51908       | 6e-88 331      |       |     |    |    |      |
| gi | 33285929 gb AY223844.1 | AAGE02014466.1 | 85.46 | 282 | 38 | 3  | 2756 |
|    | 3035 222862 223142     | 1e-75 291      |       |     |    |    |      |
| gi | 33285929 gb AY223844.1 | AAGE02014466.1 | 88.07 | 243 | 22 | 6  | 2755 |
|    | 2990 126919 126677     | 6e-73 281      |       |     |    |    |      |
| gi | 33285929 gb AY223844.1 | AAGE02014466.1 | 85.77 | 239 | 22 | 8  | 2759 |
|    | 2990 297939 298172     | 3e-61 243      |       |     |    |    |      |
| gi | 33285929 gb AY223844.1 | AAGE02014466.1 | 84.75 | 236 | 29 | 6  | 2760 |
|    | 2990 231172 231405     | 2e-57 230      |       |     |    |    |      |
| gi | 33285929 gb AY223844.1 | AAGE02014466.1 | 81.70 | 235 | 34 | 8  | 2764 |
|    | 2990 162726 162493     | 1e-44 187      |       |     |    |    |      |
| gi | 33285929 gb AY223844.1 | AAGE02014466.1 | 88.30 | 94  | 10 | 1  | 2879 |
|    | 2972 243639 243547     | 9e-22 111      |       |     |    |    |      |
| gi | 33285929 gb AY223844.1 | AAGE02011036.1 | 88.03 | 284 | 29 | 5  | 2755 |
|    | 3035 253386 253105     | 6e-88 331      |       |     |    |    |      |
| gi | 33285929 gb AY223844.1 | AAGE02011036.1 | 85.46 | 282 | 38 | 3  | 2756 |
|    | 3035 276245 276525     | 1e-75 291      |       |     |    |    |      |
| gi | 33285929 gb AY223844.1 | AAGE02011036.1 | 84.51 | 284 | 40 | 4  | 2755 |
|    | 3035 214209 213927     | 8e-72 278      |       |     |    |    |      |
| gi | 33285929 gb AY223844.1 | AAGE02011036.1 | 85.48 | 248 | 28 | 4  | 2751 |
|    | 2990 154277 154524     | 5e-64 252      |       |     |    |    |      |
| gi | 33285929 gb AY223844.1 | AAGE02011036.1 | 86.08 | 237 | 27 | 5  | 2760 |
|    | 2990 105073 104837     | 2e-63 250      |       |     |    |    |      |
| gi | 33285929 gb AY223844.1 | AAGE02011036.1 | 86.78 | 227 | 25 | 4  | 2768 |
|    | 2989 288787 288561     | 6e-63 248      |       |     |    |    |      |
| gi | 33285929 gb AY223844.1 | AAGE02011036.1 | 91.27 | 126 | 9  | 2  | 2758 |
|    | 2881 162234 162109     | 1e-39 171      |       |     |    |    |      |
| gi | 33285929 gb AY223844.1 | AAGE02009062.1 | 88.03 | 284 | 29 | 5  | 2755 |
|    | 3035 16467 16186       | 6e-88 331      |       |     |    |    |      |
| gi | 33285929 gb AY223844.1 | AAGE02007807.1 | 87.80 | 287 | 29 | 6  | 2753 |
|    | 3036 82035 81752       | 6e-88 331      |       |     |    |    |      |
| gi | 33285929 gb AY223844.1 | AAGE02007807.1 | 88.80 | 241 | 21 | 6  | 2756 |
|    | 2990 1703 1463         | 1e-75 291      |       |     |    |    |      |
| gi | 33285929 gb AY223844.1 | AAGE02007807.1 | 82.73 | 278 | 39 | 6  | 2759 |
|    | 3035 119357 119088     | 4e-60 239      |       |     |    |    |      |
| gi | 33285929 gb AY223844.1 | AAGE02007807.1 | 80.72 | 306 | 32 | 15 | 2739 |
|    | 3035 168789 169076     | 2e-52 213      |       |     |    |    |      |
| gi | 33285929 gb AY223844.1 | AAGE02007640.1 | 87.46 | 295 | 27 | 9  | 2751 |
|    | 3038 50521 50812       | 6e-88 331      |       |     |    |    |      |
| gi | 33285929 gb AY223844.1 | AAGE02007640.1 | 87.39 | 238 | 24 | 6  | 2758 |
|    | 2990 97188 96952       | 5e-69 268      |       |     |    |    |      |
| gi | 33285929 gb AY223844.1 | AAGE02007476.1 | 87.76 | 286 | 32 | 3  | 2752 |
|    | 3035 27609 27893       | 6e-88 331      |       |     |    |    |      |

|    |                        |                |       |     |    |   |      |
|----|------------------------|----------------|-------|-----|----|---|------|
| gi | 33285929 gb AY223844.1 | AAGE02007476.1 | 85.92 | 284 | 35 | 5 | 2755 |
|    | 3035 214236 213955     | 6e-78 298      |       |     |    |   |      |
| gi | 33285929 gb AY223844.1 | AAGE02007476.1 | 88.19 | 237 | 22 | 5 | 2760 |
|    | 2990 223024 223260     | 8e-72 278      |       |     |    |   |      |
| gi | 33285929 gb AY223844.1 | AAGE02007476.1 | 86.48 | 244 | 29 | 3 | 2751 |
|    | 2990 172077 172320     | 6e-68 265      |       |     |    |   |      |
| gi | 33285929 gb AY223844.1 | AAGE02007476.1 | 83.82 | 241 | 35 | 4 | 2754 |
|    | 2990 200319 200079     | 3e-56 226      |       |     |    |   |      |
| gi | 33285929 gb AY223844.1 | AAGE02006790.1 | 88.26 | 281 | 28 | 5 | 2758 |
|    | 3035 160415 160137     | 6e-88 331      |       |     |    |   |      |
| gi | 33285929 gb AY223844.1 | AAGE02006790.1 | 88.80 | 241 | 21 | 6 | 2756 |
|    | 2990 76478 76238       | 1e-75 291      |       |     |    |   |      |
| gi | 33285929 gb AY223844.1 | AAGE02006790.1 | 87.08 | 240 | 25 | 6 | 2757 |
|    | 2990 124246 124007     | 2e-68 267      |       |     |    |   |      |
| gi | 33285929 gb AY223844.1 | AAGE02006278.1 | 87.76 | 286 | 32 | 3 | 2752 |
|    | 3035 13876 14160       | 6e-88 331      |       |     |    |   |      |
| gi | 33285929 gb AY223844.1 | AAGE02005462.1 | 92.02 | 238 | 16 | 3 | 2756 |
|    | 2990 22974 22737       | 6e-88 331      |       |     |    |   |      |
| gi | 33285929 gb AY223844.1 | AAGE02005462.1 | 87.03 | 239 | 25 | 5 | 2756 |
|    | 2988 11587 11825       | 6e-68 265      |       |     |    |   |      |
| gi | 33285929 gb AY223844.1 | AAGE02004965.1 | 87.80 | 287 | 29 | 6 | 2753 |
|    | 3035 1549 1265         | 6e-88 331      |       |     |    |   |      |
| gi | 33285929 gb AY223844.1 | AAGE02004965.1 | 97.14 | 35  | 1  | 0 | 3174 |
|    | 3208 61971 61937       | 3e-06 60.2     |       |     |    |   |      |
| gi | 33285929 gb AY223844.1 | AAGE02003017.1 | 87.99 | 283 | 30 | 4 | 2758 |
|    | 3037 37773 37492       | 6e-88 331      |       |     |    |   |      |
| gi | 33285929 gb AY223844.1 | AAGE02003017.1 | 87.76 | 237 | 24 | 5 | 2759 |
|    | 2990 29464 29228       | 4e-70 272      |       |     |    |   |      |
| gi | 33285929 gb AY223844.1 | AAGE02003017.1 | 82.92 | 240 | 26 | 9 | 2757 |
|    | 2990 22195 22425       | 5e-49 202      |       |     |    |   |      |
| gi | 33285929 gb AY223844.1 | AAGE02002771.1 | 87.99 | 283 | 31 | 3 | 2755 |
|    | 3035 77248 77529       | 6e-88 331      |       |     |    |   |      |
| gi | 33285929 gb AY223844.1 | AAGE02002771.1 | 84.52 | 239 | 33 | 4 | 2756 |
|    | 2990 38650 38888       | 2e-58 233      |       |     |    |   |      |
| gi | 33285929 gb AY223844.1 | AAGE02001263.1 | 87.54 | 289 | 32 | 4 | 2753 |
|    | 3038 81587 81300       | 6e-88 331      |       |     |    |   |      |
| gi | 33285929 gb AY223844.1 | AAGE02001257.1 | 87.99 | 283 | 30 | 4 | 2755 |
|    | 3035 140616 140896     | 6e-88 331      |       |     |    |   |      |
| gi | 33285929 gb AY223844.1 | AAGE02001257.1 | 93.02 | 43  | 2  | 1 | 3166 |
|    | 3208 112856 112815     | 9e-07 62.1     |       |     |    |   |      |
| gi | 33285929 gb AY223844.1 | AAGE02001027.1 | 87.72 | 285 | 33 | 2 | 2752 |
|    | 3035 12930 13213       | 6e-88 331      |       |     |    |   |      |
| gi | 33285929 gb AY223844.1 | AAGE02000849.1 | 87.80 | 287 | 30 | 5 | 2752 |
|    | 3035 33105 33389       | 6e-88 331      |       |     |    |   |      |
| gi | 33285929 gb AY223844.1 | AAGE02000849.1 | 86.71 | 286 | 32 | 6 | 2753 |
|    | 3035 59177 59459       | 2e-82 313      |       |     |    |   |      |
| gi | 33285929 gb AY223844.1 | AAGE02034198.1 | 86.56 | 305 | 33 | 8 | 2748 |
|    | 3048 7065 7365         | 2e-87 329      |       |     |    |   |      |
| gi | 33285929 gb AY223844.1 | AAGE02032975.1 | 87.54 | 289 | 30 | 6 | 2749 |
|    | 3035 1277 993          | 2e-87 329      |       |     |    |   |      |
| gi | 33285929 gb AY223844.1 | AAGE02032975.1 | 87.61 | 234 | 23 | 6 | 2763 |
|    | 2990 10852 10619       | 2e-68 267      |       |     |    |   |      |



|    |                              |                |       |     |    |   |      |
|----|------------------------------|----------------|-------|-----|----|---|------|
| gi | 33285929 gb AY223844.1       | AAGE02032806.1 | 87.99 | 283 | 29 | 5 | 2756 |
|    | 3035 702 982 2e-87 329       |                |       |     |    |   |      |
| gi | 33285929 gb AY223844.1       | AAGE02027584.1 | 87.50 | 288 | 32 | 4 | 2751 |
|    | 3035 119074 118788 2e-87 329 |                |       |     |    |   |      |
| gi | 33285929 gb AY223844.1       | AAGE02027584.1 | 87.74 | 212 | 20 | 5 | 2784 |
|    | 2990 143027 143237 3e-61 243 |                |       |     |    |   |      |
| gi | 33285929 gb AY223844.1       | AAGE02027584.1 | 85.06 | 241 | 30 | 6 | 2754 |
|    | 2990 76178 75940 1e-60 241   |                |       |     |    |   |      |
| gi | 33285929 gb AY223844.1       | AAGE02026853.1 | 87.76 | 286 | 30 | 5 | 2753 |
|    | 3035 32368 32085 2e-87 329   |                |       |     |    |   |      |
| gi | 33285929 gb AY223844.1       | AAGE02025335.1 | 87.29 | 291 | 34 | 3 | 2752 |
|    | 3040 32666 32955 2e-87 329   |                |       |     |    |   |      |
| gi | 33285929 gb AY223844.1       | AAGE02025335.1 | 85.91 | 220 | 23 | 7 | 2760 |
|    | 2974 1584 1800 8e-57 228     |                |       |     |    |   |      |
| gi | 33285929 gb AY223844.1       | AAGE02024616.1 | 87.76 | 286 | 30 | 4 | 2752 |
|    | 3035 7432 7714 2e-87 329     |                |       |     |    |   |      |
| gi | 33285929 gb AY223844.1       | AAGE02022428.1 | 91.67 | 240 | 16 | 4 | 2755 |
|    | 2990 3761 3522 2e-87 329     |                |       |     |    |   |      |
| gi | 33285929 gb AY223844.1       | AAGE02021067.1 | 87.94 | 282 | 31 | 3 | 2756 |
|    | 3035 26073 26353 2e-87 329   |                |       |     |    |   |      |
| gi | 33285929 gb AY223844.1       | AAGE02021067.1 | 86.76 | 68  | 4  | 1 | 2778 |
|    | 2845 37408 37470 1e-09 71.3  |                |       |     |    |   |      |
| gi | 33285929 gb AY223844.1       | AAGE02020569.1 | 87.29 | 291 | 34 | 3 | 2752 |
|    | 3040 3894 4183 2e-87 329     |                |       |     |    |   |      |
| gi | 33285929 gb AY223844.1       | AAGE02020569.1 | 89.72 | 107 | 9  | 2 | 2757 |
|    | 2862 190228 190123 5e-29 135 |                |       |     |    |   |      |
| gi | 33285929 gb AY223844.1       | AAGE02019536.1 | 87.12 | 295 | 33 | 5 | 2751 |
|    | 3041 66627 66334 2e-87 329   |                |       |     |    |   |      |
| gi | 33285929 gb AY223844.1       | AAGE02019536.1 | 94.03 | 67  | 3  | 1 | 2909 |
|    | 2974 26645 26711 2e-18 100   |                |       |     |    |   |      |
| gi | 33285929 gb AY223844.1       | AAGE02018814.1 | 87.54 | 289 | 30 | 6 | 2752 |
|    | 3036 1659 1373 2e-87 329     |                |       |     |    |   |      |
| gi | 33285929 gb AY223844.1       | AAGE02017541.1 | 87.50 | 288 | 32 | 4 | 2751 |
|    | 3035 39033 38747 2e-87 329   |                |       |     |    |   |      |
| gi | 33285929 gb AY223844.1       | AAGE02016020.1 | 87.50 | 288 | 32 | 4 | 2751 |
|    | 3035 115673 115387 2e-87 329 |                |       |     |    |   |      |
| gi | 33285929 gb AY223844.1       | AAGE02016020.1 | 88.03 | 234 | 23 | 4 | 2761 |
|    | 2989 8216 8449 4e-70 272     |                |       |     |    |   |      |
| gi | 33285929 gb AY223844.1       | AAGE02015348.1 | 87.12 | 295 | 32 | 6 | 2748 |
|    | 3038 57888 58180 2e-87 329   |                |       |     |    |   |      |
| gi | 33285929 gb AY223844.1       | AAGE02014862.1 | 86.91 | 298 | 33 | 6 | 2751 |
|    | 3045 51807 51513 2e-87 329   |                |       |     |    |   |      |
| gi | 33285929 gb AY223844.1       | AAGE02014862.1 | 86.43 | 280 | 35 | 3 | 2758 |
|    | 3035 138061 137783 1e-79 303 |                |       |     |    |   |      |
| gi | 33285929 gb AY223844.1       | AAGE02014053.1 | 87.50 | 288 | 33 | 3 | 2752 |
|    | 3037 87435 87721 2e-87 329   |                |       |     |    |   |      |
| gi | 33285929 gb AY223844.1       | AAGE02014053.1 | 83.26 | 221 | 21 | 9 | 2760 |
|    | 2965 28658 28877 4e-45 189   |                |       |     |    |   |      |
| gi | 33285929 gb AY223844.1       | AAGE02011866.1 | 86.71 | 301 | 35 | 5 | 2737 |
|    | 3035 33781 33484 2e-87 329   |                |       |     |    |   |      |
| gi | 33285929 gb AY223844.1       | AAGE02010183.1 | 87.80 | 287 | 28 | 7 | 2754 |
|    | 3035 60961 60677 2e-87 329   |                |       |     |    |   |      |

|    |                              |                |           |    |    |      |
|----|------------------------------|----------------|-----------|----|----|------|
| gi | 33285929 gb AY223844.1       | AAGE02010183.1 | 89.11 248 | 19 | 8  | 2750 |
|    | 2990 19723 19477 5e-79 302   |                |           |    |    |      |
| gi | 33285929 gb AY223844.1       | AAGE02010183.1 | 87.76 245 | 24 | 5  | 2752 |
|    | 2990 97785 98029 6e-73 281   |                |           |    |    |      |
| gi | 33285929 gb AY223844.1       | AAGE02009085.1 | 87.12 295 | 33 | 5  | 2745 |
|    | 3035 37404 37697 2e-87 329   |                |           |    |    |      |
| gi | 33285929 gb AY223844.1       | AAGE02009085.1 | 90.20 245 | 19 | 5  | 2761 |
|    | 3002 44994 44752 6e-83 315   |                |           |    |    |      |
| gi | 33285929 gb AY223844.1       | AAGE02008425.1 | 87.76 286 | 30 | 5  | 2753 |
|    | 3035 135111 134828 2e-87 329 |                |           |    |    |      |
| gi | 33285929 gb AY223844.1       | AAGE02008425.1 | 83.83 235 | 25 | 7  | 2752 |
|    | 2974 195704 195937 8e-52 211 |                |           |    |    |      |
| gi | 33285929 gb AY223844.1       | AAGE02008162.1 | 87.50 288 | 32 | 4  | 2754 |
|    | 3038 101810 102096 2e-87 329 |                |           |    |    |      |
| gi | 33285929 gb AY223844.1       | AAGE02008162.1 | 85.60 125 | 13 | 5  | 2756 |
|    | 2876 51311 51188 3e-26 126   |                |           |    |    |      |
| gi | 33285929 gb AY223844.1       | AAGE02007486.1 | 87.50 288 | 32 | 4  | 2750 |
|    | 3035 500004 499719 2e-87 329 |                |           |    |    |      |
| gi | 33285929 gb AY223844.1       | AAGE02007486.1 | 86.06 287 | 35 | 5  | 2753 |
|    | 3035 132776 133061 1e-79 303 |                |           |    |    |      |
| gi | 33285929 gb AY223844.1       | AAGE02007486.1 | 89.45 237 | 19 | 5  | 2760 |
|    | 2990 383726 383490 8e-77 294 |                |           |    |    |      |
| gi | 33285929 gb AY223844.1       | AAGE02007486.1 | 83.39 307 | 40 | 10 | 2746 |
|    | 3047 344732 345032 1e-70 274 |                |           |    |    |      |
| gi | 33285929 gb AY223844.1       | AAGE02007486.1 | 85.48 241 | 28 | 7  | 2752 |
|    | 2985 304171 303931 8e-62 244 |                |           |    |    |      |
| gi | 33285929 gb AY223844.1       | AAGE02007486.1 | 83.82 241 | 34 | 4  | 2751 |
|    | 2986 101463 101703 1e-55 224 |                |           |    |    |      |
| gi | 33285929 gb AY223844.1       | AAGE02007486.1 | 84.16 202 | 27 | 5  | 2755 |
|    | 2951 155352 155553 1e-45 191 |                |           |    |    |      |
| gi | 33285929 gb AY223844.1       | AAGE02007353.1 | 87.50 288 | 33 | 3  | 2751 |
|    | 3036 120645 120931 2e-87 329 |                |           |    |    |      |
| gi | 33285929 gb AY223844.1       | AAGE02007353.1 | 86.67 285 | 34 | 4  | 2754 |
|    | 3035 104392 104109 2e-82 313 |                |           |    |    |      |
| gi | 33285929 gb AY223844.1       | AAGE02007353.1 | 85.19 270 | 32 | 7  | 2754 |
|    | 3018 23058 23324 1e-69 270   |                |           |    |    |      |
| gi | 33285929 gb AY223844.1       | AAGE02007353.1 | 86.50 237 | 26 | 5  | 2759 |
|    | 2990 122015 121780 4e-65 255 |                |           |    |    |      |
| gi | 33285929 gb AY223844.1       | AAGE02007353.1 | 87.16 218 | 23 | 5  | 2777 |
|    | 2989 71835 71618 3e-61 243   |                |           |    |    |      |
| gi | 33285929 gb AY223844.1       | AAGE02006938.1 | 87.72 285 | 32 | 3  | 2753 |
|    | 3035 44276 43993 2e-87 329   |                |           |    |    |      |
| gi | 33285929 gb AY223844.1       | AAGE02006938.1 | 86.27 153 | 17 | 4  | 2839 |
|    | 2987 151741 151893 2e-37 163 |                |           |    |    |      |
| gi | 33285929 gb AY223844.1       | AAGE02006731.1 | 87.07 294 | 35 | 3  | 2751 |
|    | 3042 16457 16749 2e-87 329   |                |           |    |    |      |
| gi | 33285929 gb AY223844.1       | AAGE02006731.1 | 97.22 36  | 1  | 0  | 3173 |
|    | 3208 19782 19747 9e-07 62.1  |                |           |    |    |      |
| gi | 33285929 gb AY223844.1       | AAGE02005847.1 | 86.87 297 | 36 | 3  | 2751 |
|    | 3045 66007 65712 2e-87 329   |                |           |    |    |      |
| gi | 33285929 gb AY223844.1       | AAGE02005847.1 | 91.15 113 | 9  | 1  | 2879 |
|    | 2990 70108 69996 5e-34 152   |                |           |    |    |      |

|    |                              |                |       |     |    |    |      |
|----|------------------------------|----------------|-------|-----|----|----|------|
| gi | 33285929 gb AY223844.1       | AAGE02005635.1 | 87.41 | 294 | 27 | 9  | 2749 |
|    | 3036 94270 93981 2e-87 329   |                |       |     |    |    |      |
| gi | 33285929 gb AY223844.1       | AAGE02005635.1 | 85.94 | 249 | 27 | 8  | 2756 |
|    | 2997 42202 42449 3e-66 259   |                |       |     |    |    |      |
| gi | 33285929 gb AY223844.1       | AAGE02004985.1 | 87.50 | 288 | 32 | 3  | 2751 |
|    | 3035 33390 33676 2e-87 329   |                |       |     |    |    |      |
| gi | 33285929 gb AY223844.1       | AAGE02004985.1 | 83.21 | 280 | 37 | 6  | 2759 |
|    | 3031 28472 28748 6e-63 248   |                |       |     |    |    |      |
| gi | 33285929 gb AY223844.1       | AAGE02004985.1 | 85.17 | 236 | 30 | 5  | 2758 |
|    | 2989 24709 24943 1e-59 237   |                |       |     |    |    |      |
| gi | 33285929 gb AY223844.1       | AAGE02004790.1 | 87.76 | 286 | 30 | 5  | 2753 |
|    | 3035 44037 44320 2e-87 329   |                |       |     |    |    |      |
| gi | 33285929 gb AY223844.1       | AAGE02004790.1 | 85.90 | 78  | 10 | 1  | 2914 |
|    | 2990 15849 15926 7e-13 82.4  |                |       |     |    |    |      |
| gi | 33285929 gb AY223844.1       | AAGE02002746.1 | 87.76 | 286 | 30 | 5  | 2754 |
|    | 3036 82022 81739 2e-87 329   |                |       |     |    |    |      |
| gi | 33285929 gb AY223844.1       | AAGE02001661.1 | 87.50 | 288 | 32 | 4  | 2751 |
|    | 3035 6726 7012 2e-87 329     |                |       |     |    |    |      |
| gi | 33285929 gb AY223844.1       | AAGE02031918.1 | 87.46 | 287 | 32 | 4  | 2752 |
|    | 3035 9036 8751 8e-87 327     |                |       |     |    |    |      |
| gi | 33285929 gb AY223844.1       | AAGE02030027.1 | 87.50 | 288 | 31 | 5  | 2751 |
|    | 3035 10995 11280 8e-87 327   |                |       |     |    |    |      |
| gi | 33285929 gb AY223844.1       | AAGE02028184.1 | 87.46 | 287 | 33 | 3  | 2751 |
|    | 3035 9327 9612 8e-87 327     |                |       |     |    |    |      |
| gi | 33285929 gb AY223844.1       | AAGE02026861.1 | 87.29 | 291 | 32 | 5  | 2750 |
|    | 3037 41290 41578 8e-87 327   |                |       |     |    |    |      |
| gi | 33285929 gb AY223844.1       | AAGE02026861.1 | 87.19 | 242 | 20 | 11 | 2758 |
|    | 2990 63341 63102 6e-68 265   |                |       |     |    |    |      |
| gi | 33285929 gb AY223844.1       | AAGE02024701.1 | 87.46 | 287 | 32 | 4  | 2752 |
|    | 3035 144742 145027 8e-87 327 |                |       |     |    |    |      |
| gi | 33285929 gb AY223844.1       | AAGE02022924.1 | 87.46 | 287 | 32 | 4  | 2752 |
|    | 3035 8994 9279 8e-87 327     |                |       |     |    |    |      |
| gi | 33285929 gb AY223844.1       | AAGE02022924.1 | 87.28 | 283 | 32 | 4  | 2756 |
|    | 3035 64109 64390 1e-84 320   |                |       |     |    |    |      |
| gi | 33285929 gb AY223844.1       | AAGE02022924.1 | 87.87 | 239 | 22 | 7  | 2758 |
|    | 2990 104023 104260 1e-70 274 |                |       |     |    |    |      |
| gi | 33285929 gb AY223844.1       | AAGE02022924.1 | 85.54 | 242 | 30 | 4  | 2750 |
|    | 2987 29795 29555 6e-63 248   |                |       |     |    |    |      |
| gi | 33285929 gb AY223844.1       | AAGE02020938.1 | 87.68 | 284 | 32 | 3  | 2752 |
|    | 3033 47016 46734 8e-87 327   |                |       |     |    |    |      |
| gi | 33285929 gb AY223844.1       | AAGE02020938.1 | 86.01 | 243 | 28 | 6  | 2754 |
|    | 2990 3162 2920 4e-65 255     |                |       |     |    |    |      |
| gi | 33285929 gb AY223844.1       | AAGE02020938.1 | 97.14 | 35  | 1  | 0  | 3174 |
|    | 3208 26866 26832 3e-06 60.2  |                |       |     |    |    |      |
| gi | 33285929 gb AY223844.1       | AAGE02020921.1 | 87.72 | 285 | 30 | 5  | 2754 |
|    | 3035 10770 10488 8e-87 327   |                |       |     |    |    |      |
| gi | 33285929 gb AY223844.1       | AAGE02020921.1 | 81.93 | 238 | 26 | 9  | 2759 |
|    | 2991 2101 1876 5e-44 185     |                |       |     |    |    |      |
| gi | 33285929 gb AY223844.1       | AAGE02017903.1 | 87.46 | 287 | 32 | 4  | 2751 |
|    | 3035 99643 99927 8e-87 327   |                |       |     |    |    |      |
| gi | 33285929 gb AY223844.1       | AAGE02017903.1 | 88.29 | 222 | 20 | 5  | 2775 |
|    | 2990 32735 32956 8e-67 261   |                |       |     |    |    |      |

|                              |                |       |     |    |   |      |
|------------------------------|----------------|-------|-----|----|---|------|
| gi 33285929 gb AY223844.1    | AAGE02017903.1 | 84.71 | 242 | 31 | 6 | 2755 |
| 2990 85587 85346 1e-59 237   |                |       |     |    |   |      |
| gi 33285929 gb AY223844.1    | AAGE02017903.1 | 83.54 | 243 | 30 | 7 | 2756 |
| 2990 5411 5171 5e-54 219     |                |       |     |    |   |      |
| gi 33285929 gb AY223844.1    | AAGE02017903.1 | 87.38 | 103 | 12 | 1 | 2752 |
| 2853 5510 5408 2e-23 117     |                |       |     |    |   |      |
| gi 33285929 gb AY223844.1    | AAGE02015902.1 | 87.46 | 287 | 33 | 3 | 2751 |
| 3035 139604 139319 8e-87 327 |                |       |     |    |   |      |
| gi 33285929 gb AY223844.1    | AAGE02015902.1 | 97.14 | 35  | 1  | 0 | 3174 |
| 3208 2319 2353 3e-06 60.2    |                |       |     |    |   |      |
| gi 33285929 gb AY223844.1    | AAGE02015744.1 | 87.24 | 290 | 34 | 3 | 2752 |
| 3039 81766 82054 8e-87 327   |                |       |     |    |   |      |
| gi 33285929 gb AY223844.1    | AAGE02015744.1 | 87.32 | 284 | 28 | 7 | 2755 |
| 3035 82815 83093 5e-84 318   |                |       |     |    |   |      |
| gi 33285929 gb AY223844.1    | AAGE02015744.1 | 88.07 | 243 | 23 | 6 | 2754 |
| 2990 61627 61385 2e-73 283   |                |       |     |    |   |      |
| gi 33285929 gb AY223844.1    | AAGE02015744.1 | 86.02 | 236 | 27 | 5 | 2761 |
| 2990 120017 119782 6e-63 248 |                |       |     |    |   |      |
| gi 33285929 gb AY223844.1    | AAGE02015625.1 | 87.50 | 288 | 31 | 5 | 2752 |
| 3036 30989 31274 8e-87 327   |                |       |     |    |   |      |
| gi 33285929 gb AY223844.1    | AAGE02015335.1 | 87.46 | 287 | 33 | 3 | 2751 |
| 3035 38484 38199 8e-87 327   |                |       |     |    |   |      |
| gi 33285929 gb AY223844.1    | AAGE02015050.1 | 87.24 | 290 | 33 | 4 | 2756 |
| 3043 13437 13724 8e-87 327   |                |       |     |    |   |      |
| gi 33285929 gb AY223844.1    | AAGE02014119.1 | 87.68 | 284 | 31 | 4 | 2756 |
| 3036 114185 113903 8e-87 327 |                |       |     |    |   |      |
| gi 33285929 gb AY223844.1    | AAGE02014119.1 | 93.15 | 73  | 2  | 3 | 2921 |
| 2991 83272 83343 1e-19 104   |                |       |     |    |   |      |
| gi 33285929 gb AY223844.1    | AAGE02014032.1 | 87.46 | 287 | 33 | 3 | 2751 |
| 3035 126079 125794 8e-87 327 |                |       |     |    |   |      |
| gi 33285929 gb AY223844.1    | AAGE02014032.1 | 88.84 | 242 | 19 | 8 | 2754 |
| 2989 87076 86837 1e-75 291   |                |       |     |    |   |      |
| gi 33285929 gb AY223844.1    | AAGE02014032.1 | 88.11 | 244 | 21 | 7 | 2754 |
| 2990 112607 112849 2e-73 283 |                |       |     |    |   |      |
| gi 33285929 gb AY223844.1    | AAGE02014032.1 | 85.54 | 242 | 23 | 9 | 2758 |
| 2990 55352 55114 3e-61 243   |                |       |     |    |   |      |
| gi 33285929 gb AY223844.1    | AAGE02014032.1 | 85.53 | 235 | 26 | 7 | 2761 |
| 2990 49944 49713 4e-60 239   |                |       |     |    |   |      |
| gi 33285929 gb AY223844.1    | AAGE02014032.1 | 83.67 | 245 | 27 | 8 | 2751 |
| 2990 32000 31764 5e-54 219   |                |       |     |    |   |      |
| gi 33285929 gb AY223844.1    | AAGE02014032.1 | 91.07 | 112 | 9  | 1 | 2879 |
| 2989 93658 93547 2e-33 150   |                |       |     |    |   |      |
| gi 33285929 gb AY223844.1    | AAGE02014032.1 | 84.46 | 148 | 19 | 4 | 2848 |
| 2991 67671 67524 3e-31 143   |                |       |     |    |   |      |
| gi 33285929 gb AY223844.1    | AAGE02013373.1 | 87.46 | 287 | 33 | 3 | 2751 |
| 3035 9748 10033 8e-87 327    |                |       |     |    |   |      |
| gi 33285929 gb AY223844.1    | AAGE02013373.1 | 88.52 | 244 | 21 | 6 | 2754 |
| 2990 84312 84069 4e-75 289   |                |       |     |    |   |      |
| gi 33285929 gb AY223844.1    | AAGE02013373.1 | 86.72 | 241 | 28 | 3 | 2754 |
| 2990 34677 34437 6e-68 265   |                |       |     |    |   |      |
| gi 33285929 gb AY223844.1    | AAGE02012599.1 | 87.46 | 287 | 32 | 4 | 2752 |
| 3035 133788 133503 8e-87 327 |                |       |     |    |   |      |

|    |                               |                |           |    |   |      |
|----|-------------------------------|----------------|-----------|----|---|------|
| gi | 33285929 gb AY223844.1        | AAGE02012599.1 | 85.42 240 | 29 | 6 | 2757 |
|    | 2990 72455 72216 8e-62 244    |                |           |    |   |      |
| gi | 33285929 gb AY223844.1        | AAGE02012599.1 | 87.34 158 | 16 | 4 | 2819 |
|    | 2973 15488 15644 8e-42 178    |                |           |    |   |      |
| gi | 33285929 gb AY223844.1        | AAGE02012599.1 | 87.50 72  | 6  | 2 | 2795 |
|    | 2863 144161 144232 2e-12 80.5 |                |           |    |   |      |
| gi | 33285929 gb AY223844.1        | AAGE02012560.1 | 87.46 287 | 33 | 3 | 2751 |
|    | 3035 26062 25777 8e-87 327    |                |           |    |   |      |
| gi | 33285929 gb AY223844.1        | AAGE02012560.1 | 88.56 236 | 21 | 6 | 2761 |
|    | 2990 29889 29654 6e-73 281    |                |           |    |   |      |
| gi | 33285929 gb AY223844.1        | AAGE02012560.1 | 81.32 182 | 30 | 4 | 2820 |
|    | 2999 31148 30969 9e-32 145    |                |           |    |   |      |
| gi | 33285929 gb AY223844.1        | AAGE02012560.1 | 97.14 35  | 1  | 0 | 3174 |
|    | 3208 26994 26960 3e-06 60.2   |                |           |    |   |      |
| gi | 33285929 gb AY223844.1        | AAGE02012461.1 | 87.72 285 | 29 | 6 | 2758 |
|    | 3038 167661 167379 8e-87 327  |                |           |    |   |      |
| gi | 33285929 gb AY223844.1        | AAGE02012461.1 | 87.98 233 | 25 | 3 | 2756 |
|    | 2986 85503 85272 4e-70 272    |                |           |    |   |      |
| gi | 33285929 gb AY223844.1        | AAGE02012461.1 | 86.94 245 | 27 | 5 | 2751 |
|    | 2990 94216 93972 1e-69 270    |                |           |    |   |      |
| gi | 33285929 gb AY223844.1        | AAGE02012461.1 | 79.84 243 | 39 | 9 | 2753 |
|    | 2990 187915 187678 5e-39 169  |                |           |    |   |      |
| gi | 33285929 gb AY223844.1        | AAGE02011979.1 | 87.46 287 | 33 | 3 | 2750 |
|    | 3034 108145 108430 8e-87 327  |                |           |    |   |      |
| gi | 33285929 gb AY223844.1        | AAGE02011979.1 | 85.25 183 | 22 | 4 | 2760 |
|    | 2937 99262 99444 2e-43 183    |                |           |    |   |      |
| gi | 33285929 gb AY223844.1        | AAGE02011609.1 | 87.46 287 | 33 | 3 | 2751 |
|    | 3035 62518 62233 8e-87 327    |                |           |    |   |      |
| gi | 33285929 gb AY223844.1        | AAGE02010830.1 | 87.68 284 | 32 | 3 | 2754 |
|    | 3035 777 495 8e-87 327        |                |           |    |   |      |
| gi | 33285929 gb AY223844.1        | AAGE02010753.1 | 87.46 287 | 33 | 3 | 2751 |
|    | 3035 106632 106917 8e-87 327  |                |           |    |   |      |
| gi | 33285929 gb AY223844.1        | AAGE02010753.1 | 87.65 243 | 25 | 5 | 2754 |
|    | 2993 9823 9583 8e-72 278      |                |           |    |   |      |
| gi | 33285929 gb AY223844.1        | AAGE02009143.1 | 87.46 287 | 32 | 4 | 2752 |
|    | 3035 3267 3552 8e-87 327      |                |           |    |   |      |
| gi | 33285929 gb AY223844.1        | AAGE02008932.1 | 87.94 282 | 29 | 5 | 2757 |
|    | 3035 37021 36742 8e-87 327    |                |           |    |   |      |
| gi | 33285929 gb AY223844.1        | AAGE02008932.1 | 89.72 214 | 16 | 5 | 2782 |
|    | 2990 29016 29228 5e-69 268    |                |           |    |   |      |
| gi | 33285929 gb AY223844.1        | AAGE02008932.1 | 87.37 95  | 12 | 0 | 2756 |
|    | 2850 19394 19488 3e-21 110    |                |           |    |   |      |
| gi | 33285929 gb AY223844.1        | AAGE02008773.1 | 87.50 288 | 31 | 5 | 2751 |
|    | 3035 146007 145722 8e-87 327  |                |           |    |   |      |
| gi | 33285929 gb AY223844.1        | AAGE02008773.1 | 84.29 280 | 39 | 5 | 2750 |
|    | 3027 149156 149432 5e-69 268  |                |           |    |   |      |
| gi | 33285929 gb AY223844.1        | AAGE02008394.1 | 87.24 290 | 34 | 3 | 2755 |
|    | 3042 10174 10462 8e-87 327    |                |           |    |   |      |
| gi | 33285929 gb AY223844.1        | AAGE02008394.1 | 94.44 90  | 4  | 1 | 2902 |
|    | 2990 14144 14233 1e-29 137    |                |           |    |   |      |
| gi | 33285929 gb AY223844.1        | AAGE02008122.1 | 87.46 287 | 33 | 3 | 2751 |
|    | 3035 36375 36090 8e-87 327    |                |           |    |   |      |

|    |                               |                |           |    |    |      |
|----|-------------------------------|----------------|-----------|----|----|------|
| gi | 33285929 gb AY223844.1        | AAGE02008122.1 | 87.05 224 | 23 | 6  | 2755 |
|    | 2973 34328 34550 6e-63 248    |                |           |    |    |      |
| gi | 33285929 gb AY223844.1        | AAGE02008122.1 | 84.77 243 | 26 | 9  | 2754 |
|    | 2990 37204 37441 2e-58 233    |                |           |    |    |      |
| gi | 33285929 gb AY223844.1        | AAGE02008122.1 | 92.09 139 | 9  | 2  | 2753 |
|    | 2889 45028 45166 8e-47 195    |                |           |    |    |      |
| gi | 33285929 gb AY223844.1        | AAGE02008122.1 | 91.15 113 | 7  | 3  | 2880 |
|    | 2990 46773 46662 2e-33 150    |                |           |    |    |      |
| gi | 33285929 gb AY223844.1        | AAGE02007803.1 | 87.46 287 | 33 | 3  | 2751 |
|    | 3035 187095 187380 8e-87 327  |                |           |    |    |      |
| gi | 33285929 gb AY223844.1        | AAGE02007803.1 | 85.66 244 | 24 | 9  | 2758 |
|    | 2990 66563 66320 2e-62 246    |                |           |    |    |      |
| gi | 33285929 gb AY223844.1        | AAGE02007803.1 | 81.33 241 | 26 | 10 | 2754 |
|    | 2990 208667 208892 8e-42 178  |                |           |    |    |      |
| gi | 33285929 gb AY223844.1        | AAGE02007803.1 | 81.17 154 | 26 | 2  | 2823 |
|    | 2973 42848 42695 1e-24 121    |                |           |    |    |      |
| gi | 33285929 gb AY223844.1        | AAGE02007225.1 | 87.24 290 | 33 | 4  | 2753 |
|    | 3039 88007 88295 8e-87 327    |                |           |    |    |      |
| gi | 33285929 gb AY223844.1        | AAGE02007007.1 | 87.90 281 | 30 | 4  | 2757 |
|    | 3035 28548 28270 8e-87 327    |                |           |    |    |      |
| gi | 33285929 gb AY223844.1        | AAGE02006771.1 | 87.46 287 | 32 | 4  | 2752 |
|    | 3035 16843 16558 8e-87 327    |                |           |    |    |      |
| gi | 33285929 gb AY223844.1        | AAGE02006256.1 | 87.29 291 | 32 | 4  | 2749 |
|    | 3035 44508 44797 8e-87 327    |                |           |    |    |      |
| gi | 33285929 gb AY223844.1        | AAGE02006256.1 | 94.00 50  | 2  | 1  | 2942 |
|    | 2990 106519 106568 1e-10 75.0 |                |           |    |    |      |
| gi | 33285929 gb AY223844.1        | AAGE02005264.1 | 87.54 289 | 29 | 7  | 2754 |
|    | 3038 18362 18077 8e-87 327    |                |           |    |    |      |
| gi | 33285929 gb AY223844.1        | AAGE02005264.1 | 87.19 242 | 26 | 5  | 2754 |
|    | 2990 27868 27627 1e-69 270    |                |           |    |    |      |
| gi | 33285929 gb AY223844.1        | AAGE02004408.1 | 87.68 284 | 32 | 3  | 2754 |
|    | 3035 569 851 8e-87 327        |                |           |    |    |      |
| gi | 33285929 gb AY223844.1        | AAGE02004366.1 | 91.06 246 | 16 | 6  | 2751 |
|    | 2990 51903 51658 8e-87 327    |                |           |    |    |      |
| gi | 33285929 gb AY223844.1        | AAGE02003896.1 | 87.94 282 | 29 | 5  | 2757 |
|    | 3035 66851 67130 8e-87 327    |                |           |    |    |      |
| gi | 33285929 gb AY223844.1        | AAGE02003896.1 | 86.97 284 | 34 | 3  | 2754 |
|    | 3035 90582 90300 2e-83 316    |                |           |    |    |      |
| gi | 33285929 gb AY223844.1        | AAGE02003896.1 | 87.60 242 | 24 | 6  | 2755 |
|    | 2990 151749 151990 3e-71 276  |                |           |    |    |      |
| gi | 33285929 gb AY223844.1        | AAGE02003501.1 | 87.46 287 | 33 | 3  | 2751 |
|    | 3035 6192 5907 8e-87 327      |                |           |    |    |      |
| gi | 33285929 gb AY223844.1        | AAGE02003501.1 | 88.52 244 | 22 | 5  | 2752 |
|    | 2990 37556 37314 1e-75 291    |                |           |    |    |      |
| gi | 33285929 gb AY223844.1        | AAGE02003423.1 | 87.72 285 | 30 | 5  | 2754 |
|    | 3035 241894 242176 8e-87 327  |                |           |    |    |      |
| gi | 33285929 gb AY223844.1        | AAGE02003423.1 | 84.72 288 | 40 | 4  | 2751 |
|    | 3035 114428 114714 5e-74 285  |                |           |    |    |      |
| gi | 33285929 gb AY223844.1        | AAGE02003423.1 | 87.87 239 | 24 | 4  | 2757 |
|    | 2990 123716 123478 3e-71 276  |                |           |    |    |      |
| gi | 33285929 gb AY223844.1        | AAGE02003423.1 | 85.71 245 | 29 | 6  | 2752 |
|    | 2990 149872 150116 1e-64 254  |                |           |    |    |      |

|    |                        |                |           |    |    |      |
|----|------------------------|----------------|-----------|----|----|------|
| gi | 33285929 gb AY223844.1 | AAGE02003423.1 | 83.61 244 | 24 | 8  | 2751 |
|    | 2990 217022 216791     | 6e-53 215      |           |    |    |      |
| gi | 33285929 gb AY223844.1 | AAGE02002940.1 | 87.94 282 | 29 | 5  | 2757 |
|    | 3035 196399 196678     | 8e-87 327      |           |    |    |      |
| gi | 33285929 gb AY223844.1 | AAGE02002940.1 | 87.80 246 | 23 | 7  | 2751 |
|    | 2990 91231 90987       | 6e-73 281      |           |    |    |      |
| gi | 33285929 gb AY223844.1 | AAGE02002940.1 | 86.67 240 | 26 | 5  | 2756 |
|    | 2990 53210 53448       | 8e-67 261      |           |    |    |      |
| gi | 33285929 gb AY223844.1 | AAGE02002940.1 | 85.77 246 | 30 | 5  | 2757 |
|    | 2997 74067 73822       | 4e-65 255      |           |    |    |      |
| gi | 33285929 gb AY223844.1 | AAGE02002940.1 | 84.26 108 | 16 | 1  | 2755 |
|    | 2861 40040 39933       | 1e-19 104      |           |    |    |      |
| gi | 33285929 gb AY223844.1 | AAGE02002360.1 | 87.46 287 | 33 | 3  | 2751 |
|    | 3035 25364 25079       | 8e-87 327      |           |    |    |      |
| gi | 33285929 gb AY223844.1 | AAGE02002360.1 | 89.26 242 | 19 | 7  | 2755 |
|    | 2990 71970 71730       | 2e-77 296      |           |    |    |      |
| gi | 33285929 gb AY223844.1 | AAGE02002360.1 | 89.41 236 | 21 | 4  | 2759 |
|    | 2990 229102 228867     | 8e-77 294      |           |    |    |      |
| gi | 33285929 gb AY223844.1 | AAGE02002360.1 | 84.62 234 | 32 | 4  | 2759 |
|    | 2988 135335 135568     | 2e-57 230      |           |    |    |      |
| gi | 33285929 gb AY223844.1 | AAGE02002360.1 | 83.61 244 | 24 | 10 | 2751 |
|    | 2990 145348 145117     | 6e-53 215      |           |    |    |      |
| gi | 33285929 gb AY223844.1 | AAGE02001143.1 | 87.72 285 | 30 | 5  | 2755 |
|    | 3035 68189 67906       | 8e-87 327      |           |    |    |      |
| gi | 33285929 gb AY223844.1 | AAGE02001143.1 | 93.90 82  | 4  | 1  | 2910 |
|    | 2990 67101 67182       | 4e-25 122      |           |    |    |      |
| gi | 33285929 gb AY223844.1 | AAGE02001115.1 | 87.50 288 | 31 | 5  | 2751 |
|    | 3035 105926 106211     | 8e-87 327      |           |    |    |      |
| gi | 33285929 gb AY223844.1 | AAGE02000167.1 | 87.46 287 | 33 | 3  | 2751 |
|    | 3035 1513 1798         | 8e-87 327      |           |    |    |      |
| gi | 33285929 gb AY223844.1 | AAGE02026929.1 | 87.41 286 | 33 | 3  | 2752 |
|    | 3035 128798 128514     | 3e-86 326      |           |    |    |      |
| gi | 33285929 gb AY223844.1 | AAGE02026929.1 | 88.43 216 | 21 | 4  | 2777 |
|    | 2988 91964 92179       | 1e-65 257      |           |    |    |      |
| gi | 33285929 gb AY223844.1 | AAGE02026929.1 | 86.25 240 | 27 | 6  | 2757 |
|    | 2990 112715 112954     | 4e-65 255      |           |    |    |      |
| gi | 33285929 gb AY223844.1 | AAGE02026929.1 | 96.23 53  | 2  | 0  | 2759 |
|    | 2811 132055 132003     | 1e-14 87.9     |           |    |    |      |
| gi | 33285929 gb AY223844.1 | AAGE02026842.1 | 87.24 290 | 32 | 5  | 2750 |
|    | 3035 9661 9949         | 3e-86 326      |           |    |    |      |
| gi | 33285929 gb AY223844.1 | AAGE02026752.1 | 86.82 296 | 34 | 5  | 2751 |
|    | 3042 7233 7527         | 3e-86 326      |           |    |    |      |
| gi | 33285929 gb AY223844.1 | AAGE02026399.1 | 87.20 289 | 33 | 4  | 2752 |
|    | 3037 58218 58505       | 3e-86 326      |           |    |    |      |
| gi | 33285929 gb AY223844.1 | AAGE02026399.1 | 89.39 245 | 17 | 8  | 2753 |
|    | 2990 192445 192687     | 2e-78 300      |           |    |    |      |
| gi | 33285929 gb AY223844.1 | AAGE02026399.1 | 87.67 227 | 24 | 3  | 2752 |
|    | 2974 56122 56348       | 8e-67 261      |           |    |    |      |
| gi | 33285929 gb AY223844.1 | AAGE02026399.1 | 85.71 238 | 30 | 4  | 2757 |
|    | 2990 40854 40617       | 6e-63 248      |           |    |    |      |
| gi | 33285929 gb AY223844.1 | AAGE02026399.1 | 88.00 175 | 17 | 4  | 2820 |
|    | 2990 44527 44701       | 1e-49 204      |           |    |    |      |

|    |                              |                |           |    |   |      |
|----|------------------------------|----------------|-----------|----|---|------|
| gi | 33285929 gb AY223844.1       | AAGE02025519.1 | 87.41 286 | 33 | 3 | 2752 |
|    | 3035 88315 88031 3e-86 326   |                |           |    |   |      |
| gi | 33285929 gb AY223844.1       | AAGE02023743.1 | 87.37 285 | 34 | 2 | 2752 |
|    | 3035 8020 7737 3e-86 326     |                |           |    |   |      |
| gi | 33285929 gb AY223844.1       | AAGE02023743.1 | 88.33 240 | 22 | 6 | 2757 |
|    | 2990 152447 152686 2e-73 283 |                |           |    |   |      |
| gi | 33285929 gb AY223844.1       | AAGE02023743.1 | 88.84 224 | 19 | 6 | 2757 |
|    | 2974 74952 74729 1e-69 270   |                |           |    |   |      |
| gi | 33285929 gb AY223844.1       | AAGE02023743.1 | 78.72 235 | 30 | 7 | 2753 |
|    | 2986 240045 240260 4e-30 139 |                |           |    |   |      |
| gi | 33285929 gb AY223844.1       | AAGE02022019.1 | 87.41 286 | 33 | 3 | 2752 |
|    | 3035 77500 77784 3e-86 326   |                |           |    |   |      |
| gi | 33285929 gb AY223844.1       | AAGE02022019.1 | 88.12 261 | 28 | 3 | 2757 |
|    | 3015 6952 7211 1e-80 307     |                |           |    |   |      |
| gi | 33285929 gb AY223844.1       | AAGE02022019.1 | 87.82 238 | 24 | 5 | 2758 |
|    | 2990 19212 19449 1e-70 274   |                |           |    |   |      |
| gi | 33285929 gb AY223844.1       | AAGE02022019.1 | 85.50 269 | 31 | 7 | 2755 |
|    | 3018 82835 83100 1e-70 274   |                |           |    |   |      |
| gi | 33285929 gb AY223844.1       | AAGE02022019.1 | 92.73 55  | 3  | 1 | 2751 |
|    | 2804 10637 10583 9e-12 78.7  |                |           |    |   |      |
| gi | 33285929 gb AY223844.1       | AAGE02021950.1 | 87.63 283 | 32 | 3 | 2755 |
|    | 3035 21082 20801 3e-86 326   |                |           |    |   |      |
| gi | 33285929 gb AY223844.1       | AAGE02021752.1 | 87.50 288 | 29 | 7 | 2750 |
|    | 3034 2178 1895 3e-86 326     |                |           |    |   |      |
| gi | 33285929 gb AY223844.1       | AAGE02021752.1 | 88.38 241 | 23 | 5 | 2755 |
|    | 2990 45183 45423 5e-74 285   |                |           |    |   |      |
| gi | 33285929 gb AY223844.1       | AAGE02021752.1 | 84.51 284 | 40 | 4 | 2755 |
|    | 3035 69545 69827 8e-72 278   |                |           |    |   |      |
| gi | 33285929 gb AY223844.1       | AAGE02021752.1 | 86.12 245 | 28 | 5 | 2751 |
|    | 2989 70414 70658 3e-66 259   |                |           |    |   |      |
| gi | 33285929 gb AY223844.1       | AAGE02020409.1 | 87.24 290 | 31 | 4 | 2751 |
|    | 3035 15035 15323 3e-86 326   |                |           |    |   |      |
| gi | 33285929 gb AY223844.1       | AAGE02020409.1 | 85.53 304 | 37 | 7 | 2736 |
|    | 3036 17563 17862 8e-82 311   |                |           |    |   |      |
| gi | 33285929 gb AY223844.1       | AAGE02020298.1 | 87.24 290 | 31 | 6 | 2748 |
|    | 3035 20601 20886 3e-86 326   |                |           |    |   |      |
| gi | 33285929 gb AY223844.1       | AAGE02020298.1 | 97.14 35  | 1  | 0 | 3174 |
|    | 3208 15994 15960 3e-06 60.2  |                |           |    |   |      |
| gi | 33285929 gb AY223844.1       | AAGE02019719.1 | 87.41 286 | 33 | 3 | 2752 |
|    | 3035 11181 11465 3e-86 326   |                |           |    |   |      |
| gi | 33285929 gb AY223844.1       | AAGE02019719.1 | 88.98 245 | 21 | 6 | 2751 |
|    | 2989 8308 8552 6e-78 298     |                |           |    |   |      |
| gi | 33285929 gb AY223844.1       | AAGE02019719.1 | 85.96 235 | 28 | 4 | 2760 |
|    | 2990 12111 11878 2e-62 246   |                |           |    |   |      |
| gi | 33285929 gb AY223844.1       | AAGE02019126.1 | 87.68 284 | 30 | 5 | 2755 |
|    | 3035 7079 7360 3e-86 326     |                |           |    |   |      |
| gi | 33285929 gb AY223844.1       | AAGE02017931.1 | 87.20 289 | 33 | 4 | 2753 |
|    | 3038 64225 63938 3e-86 326   |                |           |    |   |      |
| gi | 33285929 gb AY223844.1       | AAGE02017931.1 | 86.71 286 | 34 | 4 | 2753 |
|    | 3035 161608 161892 6e-83 315 |                |           |    |   |      |
| gi | 33285929 gb AY223844.1       | AAGE02017931.1 | 86.55 238 | 23 | 7 | 2759 |
|    | 2990 105159 104925 1e-64 254 |                |           |    |   |      |



|                               |                |           |    |   |      |
|-------------------------------|----------------|-----------|----|---|------|
| gi 33285929 gb AY223844.1     | AAGE02017931.1 | 93.02 43  | 2  | 1 | 3166 |
| 3208 90344 90385 9e-07 62.1   |                |           |    |   |      |
| gi 33285929 gb AY223844.1     | AAGE02017096.1 | 88.60 272 | 25 | 6 | 2766 |
| 3034 46635 46367 3e-86 326    |                |           |    |   |      |
| gi 33285929 gb AY223844.1     | AAGE02017096.1 | 87.18 273 | 32 | 3 | 2757 |
| 3027 88345 88616 1e-80 307    |                |           |    |   |      |
| gi 33285929 gb AY223844.1     | AAGE02017096.1 | 87.19 242 | 24 | 7 | 2754 |
| 2989 16065 16305 5e-69 268    |                |           |    |   |      |
| gi 33285929 gb AY223844.1     | AAGE02016458.1 | 87.24 290 | 31 | 6 | 2748 |
| 3035 112697 112412 3e-86 326  |                |           |    |   |      |
| gi 33285929 gb AY223844.1     | AAGE02016458.1 | 87.15 288 | 33 | 4 | 2751 |
| 3035 99700 99414 1e-85 324    |                |           |    |   |      |
| gi 33285929 gb AY223844.1     | AAGE02015778.1 | 87.63 283 | 32 | 3 | 2755 |
| 3035 33330 33049 3e-86 326    |                |           |    |   |      |
| gi 33285929 gb AY223844.1     | AAGE02015413.1 | 87.20 289 | 33 | 4 | 2750 |
| 3035 22044 22331 3e-86 326    |                |           |    |   |      |
| gi 33285929 gb AY223844.1     | AAGE02015413.1 | 85.76 288 | 37 | 4 | 2751 |
| 3035 25467 25181 5e-79 302    |                |           |    |   |      |
| gi 33285929 gb AY223844.1     | AAGE02015413.1 | 87.14 241 | 25 | 6 | 2756 |
| 2990 9661 9421 5e-69 268      |                |           |    |   |      |
| gi 33285929 gb AY223844.1     | AAGE02015413.1 | 86.47 133 | 12 | 5 | 2861 |
| 2990 49650 49521 1e-30 141    |                |           |    |   |      |
| gi 33285929 gb AY223844.1     | AAGE02014410.1 | 87.41 286 | 32 | 4 | 2753 |
| 3035 3121 3405 3e-86 326      |                |           |    |   |      |
| gi 33285929 gb AY223844.1     | AAGE02011189.1 | 87.37 285 | 34 | 2 | 2752 |
| 3035 16806 16523 3e-86 326    |                |           |    |   |      |
| gi 33285929 gb AY223844.1     | AAGE02010573.1 | 87.72 285 | 28 | 7 | 2759 |
| 3039 406322 406041 3e-86 326  |                |           |    |   |      |
| gi 33285929 gb AY223844.1     | AAGE02010573.1 | 85.60 243 | 31 | 3 | 2752 |
| 2990 325087 325329 5e-64 252  |                |           |    |   |      |
| gi 33285929 gb AY223844.1     | AAGE02010573.1 | 82.21 298 | 36 | 8 | 2754 |
| 3050 325405 325686 1e-60 241  |                |           |    |   |      |
| gi 33285929 gb AY223844.1     | AAGE02010573.1 | 83.47 248 | 26 | 9 | 2745 |
| 2987 37171 37408 2e-53 217    |                |           |    |   |      |
| gi 33285929 gb AY223844.1     | AAGE02010573.1 | 91.78 73  | 6  | 0 | 2902 |
| 2974 321208 321280 5e-19 102  |                |           |    |   |      |
| gi 33285929 gb AY223844.1     | AAGE02010573.1 | 89.33 75  | 8  | 0 | 2788 |
| 2862 245216 245142 9e-17 95.3 |                |           |    |   |      |
| gi 33285929 gb AY223844.1     | AAGE02010134.1 | 87.68 284 | 30 | 5 | 2755 |
| 3035 74822 74541 3e-86 326    |                |           |    |   |      |
| gi 33285929 gb AY223844.1     | AAGE02009005.1 | 87.68 284 | 30 | 5 | 2755 |
| 3035 51190 50909 3e-86 326    |                |           |    |   |      |
| gi 33285929 gb AY223844.1     | AAGE02009005.1 | 85.77 239 | 25 | 8 | 2761 |
| 2990 54428 54666 8e-62 244    |                |           |    |   |      |
| gi 33285929 gb AY223844.1     | AAGE02009005.1 | 85.06 241 | 23 | 7 | 2751 |
| 2990 27137 27365 2e-58 233    |                |           |    |   |      |
| gi 33285929 gb AY223844.1     | AAGE02009005.1 | 83.68 239 | 29 | 8 | 2756 |
| 2988 6498 6264 2e-53 217      |                |           |    |   |      |
| gi 33285929 gb AY223844.1     | AAGE02008621.1 | 87.41 286 | 32 | 4 | 2753 |
| 3035 12157 11873 3e-86 326    |                |           |    |   |      |
| gi 33285929 gb AY223844.1     | AAGE02007855.1 | 89.88 257 | 20 | 6 | 2740 |
| 2990 57173 57429 3e-86 326    |                |           |    |   |      |

|    |                          |                |       |     |    |   |      |
|----|--------------------------|----------------|-------|-----|----|---|------|
| gi | 33285929 gb AY223844.1   | AAGE02006803.1 | 87.63 | 283 | 32 | 3 | 2755 |
|    | 3035 22935 23216 3e-86   | 326            |       |     |    |   |      |
| gi | 33285929 gb AY223844.1   | AAGE02005369.1 | 86.99 | 292 | 34 | 4 | 2750 |
|    | 3038 43064 43354 3e-86   | 326            |       |     |    |   |      |
| gi | 33285929 gb AY223844.1   | AAGE02005369.1 | 86.57 | 283 | 35 | 3 | 2755 |
|    | 3035 6975 7256 3e-81     | 309            |       |     |    |   |      |
| gi | 33285929 gb AY223844.1   | AAGE02005369.1 | 87.19 | 242 | 25 | 5 | 2755 |
|    | 2990 42620 42379 1e-69   | 270            |       |     |    |   |      |
| gi | 33285929 gb AY223844.1   | AAGE02005369.1 | 88.67 | 203 | 17 | 6 | 2754 |
|    | 2952 48122 48322 3e-61   | 243            |       |     |    |   |      |
| gi | 33285929 gb AY223844.1   | AAGE02005369.1 | 90.24 | 82  | 6  | 2 | 2892 |
|    | 2972 107985 107905 4e-20 | 106            |       |     |    |   |      |
| gi | 33285929 gb AY223844.1   | AAGE02005313.1 | 87.90 | 281 | 29 | 5 | 2758 |
|    | 3035 359272 358994 3e-86 | 326            |       |     |    |   |      |
| gi | 33285929 gb AY223844.1   | AAGE02005313.1 | 87.63 | 283 | 30 | 5 | 2756 |
|    | 3035 555742 556022 1e-85 | 324            |       |     |    |   |      |
| gi | 33285929 gb AY223844.1   | AAGE02005313.1 | 87.61 | 234 | 23 | 6 | 2760 |
|    | 2988 234450 234682 2e-68 | 267            |       |     |    |   |      |
| gi | 33285929 gb AY223844.1   | AAGE02005313.1 | 87.56 | 201 | 23 | 2 | 2759 |
|    | 2957 266710 266910 6e-58 | 231            |       |     |    |   |      |
| gi | 33285929 gb AY223844.1   | AAGE02005313.1 | 82.30 | 243 | 35 | 7 | 2754 |
|    | 2991 214121 214360 1e-49 | 204            |       |     |    |   |      |
| gi | 33285929 gb AY223844.1   | AAGE02005313.1 | 86.55 | 171 | 19 | 4 | 2823 |
|    | 2989 341765 341595 5e-44 | 185            |       |     |    |   |      |
| gi | 33285929 gb AY223844.1   | AAGE02005313.1 | 75.26 | 194 | 39 | 6 | 2760 |
|    | 2946 376798 376607 2e-13 | 84.2           |       |     |    |   |      |
| gi | 33285929 gb AY223844.1   | AAGE02004341.1 | 87.46 | 287 | 31 | 5 | 2752 |
|    | 3035 27791 27507 3e-86   | 326            |       |     |    |   |      |
| gi | 33285929 gb AY223844.1   | AAGE02004341.1 | 90.24 | 246 | 18 | 6 | 2751 |
|    | 2990 76241 76486 2e-83   | 316            |       |     |    |   |      |
| gi | 33285929 gb AY223844.1   | AAGE02004341.1 | 88.11 | 227 | 24 | 2 | 2751 |
|    | 2974 80524 80750 2e-68   | 267            |       |     |    |   |      |
| gi | 33285929 gb AY223844.1   | AAGE02004341.1 | 84.65 | 202 | 25 | 4 | 2795 |
|    | 2990 149921 149720 2e-47 | 196            |       |     |    |   |      |
| gi | 33285929 gb AY223844.1   | AAGE02004338.1 | 87.46 | 287 | 31 | 5 | 2751 |
|    | 3035 14623 14340 3e-86   | 326            |       |     |    |   |      |
| gi | 33285929 gb AY223844.1   | AAGE02004338.1 | 88.28 | 239 | 23 | 5 | 2758 |
|    | 2991 17391 17629 6e-73   | 281            |       |     |    |   |      |
| gi | 33285929 gb AY223844.1   | AAGE02004338.1 | 89.34 | 197 | 17 | 3 | 2798 |
|    | 2990 33988 33792 8e-62   | 244            |       |     |    |   |      |
| gi | 33285929 gb AY223844.1   | AAGE02004338.1 | 91.82 | 110 | 8  | 1 | 2882 |
|    | 2990 27003 26894 5e-34   | 152            |       |     |    |   |      |
| gi | 33285929 gb AY223844.1   | AAGE02004338.1 | 94.57 | 92  | 5  | 0 | 2752 |
|    | 2843 4536 4627 3e-31     | 143            |       |     |    |   |      |
| gi | 33285929 gb AY223844.1   | AAGE02004177.1 | 87.37 | 285 | 34 | 2 | 2752 |
|    | 3035 11017 11300 3e-86   | 326            |       |     |    |   |      |
| gi | 33285929 gb AY223844.1   | AAGE02004177.1 | 85.17 | 236 | 29 | 6 | 2757 |
|    | 2986 28449 28684 1e-59   | 237            |       |     |    |   |      |
| gi | 33285929 gb AY223844.1   | AAGE02004177.1 | 87.31 | 197 | 19 | 6 | 2799 |
|    | 2990 14193 14388 1e-54   | 220            |       |     |    |   |      |
| gi | 33285929 gb AY223844.1   | AAGE02004106.1 | 87.68 | 284 | 30 | 5 | 2759 |
|    | 3039 22513 22232 3e-86   | 326            |       |     |    |   |      |

|    |                        |                              |       |     |    |   |      |
|----|------------------------|------------------------------|-------|-----|----|---|------|
| gi | 33285929 gb AY223844.1 | AAGE02004106.1               | 86.12 | 245 | 28 | 5 | 2751 |
|    |                        | 2990 17414 17657 3e-66 259   |       |     |    |   |      |
| gi | 33285929 gb AY223844.1 | AAGE02003553.1               | 87.90 | 281 | 29 | 5 | 2758 |
|    |                        | 3035 3566 3844 3e-86 326     |       |     |    |   |      |
| gi | 33285929 gb AY223844.1 | AAGE02001808.1               | 87.63 | 283 | 31 | 4 | 2755 |
|    |                        | 3035 112873 113153 3e-86 326 |       |     |    |   |      |
| gi | 33285929 gb AY223844.1 | AAGE02001808.1               | 83.17 | 208 | 29 | 5 | 2759 |
|    |                        | 2960 89714 89921 5e-44 185   |       |     |    |   |      |
| gi | 33285929 gb AY223844.1 | AAGE02001808.1               | 82.04 | 167 | 25 | 5 | 2754 |
|    |                        | 2917 142024 141860 1e-29 137 |       |     |    |   |      |
| gi | 33285929 gb AY223844.1 | AAGE02001808.1               | 82.10 | 162 | 21 | 8 | 2835 |
|    |                        | 2990 64669 64510 7e-28 132   |       |     |    |   |      |
| gi | 33285929 gb AY223844.1 | AAGE02000458.1               | 87.41 | 286 | 33 | 3 | 2752 |
|    |                        | 3035 11408 11124 3e-86 326   |       |     |    |   |      |
| gi | 33285929 gb AY223844.1 | AAGE02033414.1               | 87.15 | 288 | 33 | 4 | 2751 |
|    |                        | 3035 1059 773 1e-85 324      |       |     |    |   |      |
| gi | 33285929 gb AY223844.1 | AAGE02032654.1               | 87.41 | 286 | 31 | 5 | 2751 |
|    |                        | 3033 4341 4058 1e-85 324     |       |     |    |   |      |
| gi | 33285929 gb AY223844.1 | AAGE02032654.1               | 86.67 | 285 | 35 | 3 | 2753 |
|    |                        | 3035 8780 9063 2e-82 313     |       |     |    |   |      |
| gi | 33285929 gb AY223844.1 | AAGE02028180.1               | 87.37 | 285 | 33 | 3 | 2753 |
|    |                        | 3035 14169 14452 1e-85 324   |       |     |    |   |      |
| gi | 33285929 gb AY223844.1 | AAGE02027581.1               | 87.59 | 282 | 32 | 3 | 2756 |
|    |                        | 3035 15378 15098 1e-85 324   |       |     |    |   |      |
| gi | 33285929 gb AY223844.1 | AAGE02027581.1               | 84.82 | 191 | 25 | 3 | 2763 |
|    |                        | 2949 39795 39985 4e-45 189   |       |     |    |   |      |
| gi | 33285929 gb AY223844.1 | AAGE02027581.1               | 81.93 | 166 | 24 | 6 | 2829 |
|    |                        | 2989 20920 20756 5e-29 135   |       |     |    |   |      |
| gi | 33285929 gb AY223844.1 | AAGE02025668.1               | 87.37 | 285 | 33 | 3 | 2753 |
|    |                        | 3035 9906 9623 1e-85 324     |       |     |    |   |      |
| gi | 33285929 gb AY223844.1 | AAGE02025620.1               | 87.63 | 283 | 30 | 5 | 2756 |
|    |                        | 3035 53217 53497 1e-85 324   |       |     |    |   |      |
| gi | 33285929 gb AY223844.1 | AAGE02025620.1               | 84.64 | 280 | 36 | 6 | 2757 |
|    |                        | 3035 60417 60690 4e-70 272   |       |     |    |   |      |
| gi | 33285929 gb AY223844.1 | AAGE02025620.1               | 86.83 | 243 | 25 | 6 | 2754 |
|    |                        | 2990 166567 166808 6e-68 265 |       |     |    |   |      |
| gi | 33285929 gb AY223844.1 | AAGE02025363.1               | 86.87 | 297 | 30 | 9 | 2745 |
|    |                        | 3035 61556 61263 1e-85 324   |       |     |    |   |      |
| gi | 33285929 gb AY223844.1 | AAGE02025363.1               | 84.86 | 284 | 39 | 4 | 2755 |
|    |                        | 3035 29105 28823 2e-73 283   |       |     |    |   |      |
| gi | 33285929 gb AY223844.1 | AAGE02024625.1               | 87.37 | 285 | 32 | 4 | 2754 |
|    |                        | 3035 7793 7510 1e-85 324     |       |     |    |   |      |
| gi | 33285929 gb AY223844.1 | AAGE02024251.1               | 87.15 | 288 | 33 | 4 | 2751 |
|    |                        | 3035 60747 61033 1e-85 324   |       |     |    |   |      |
| gi | 33285929 gb AY223844.1 | AAGE02024251.1               | 86.64 | 247 | 26 | 5 | 2751 |
|    |                        | 2990 6438 6684 2e-68 267     |       |     |    |   |      |
| gi | 33285929 gb AY223844.1 | AAGE02024074.1               | 87.41 | 286 | 30 | 5 | 2752 |
|    |                        | 3035 2424 2143 1e-85 324     |       |     |    |   |      |
| gi | 33285929 gb AY223844.1 | AAGE02021745.1               | 90.98 | 244 | 16 | 6 | 2753 |
|    |                        | 2990 5972 5729 1e-85 324     |       |     |    |   |      |
| gi | 33285929 gb AY223844.1 | AAGE02020770.1               | 87.15 | 288 | 34 | 3 | 2751 |
|    |                        | 3036 16164 16450 1e-85 324   |       |     |    |   |      |

|                           |                |           |    |    |      |
|---------------------------|----------------|-----------|----|----|------|
| gi 33285929 gb AY223844.1 | AAGE02020770.1 | 85.02 287 | 37 | 6  | 2752 |
| 3035 23974 24257 1e-74    | 287            |           |    |    |      |
| gi 33285929 gb AY223844.1 | AAGE02020513.1 | 87.15 288 | 34 | 3  | 2751 |
| 3036 21781 21495 1e-85    | 324            |           |    |    |      |
| gi 33285929 gb AY223844.1 | AAGE02018136.1 | 87.15 288 | 34 | 3  | 2754 |
| 3039 4062 4348 1e-85      | 324            |           |    |    |      |
| gi 33285929 gb AY223844.1 | AAGE02018136.1 | 83.68 239 | 22 | 10 | 2758 |
| 2990 13033 13260 3e-51    | 209            |           |    |    |      |
| gi 33285929 gb AY223844.1 | AAGE02018064.1 | 87.63 283 | 30 | 5  | 2756 |
| 3035 2490 2770 1e-85      | 324            |           |    |    |      |
| gi 33285929 gb AY223844.1 | AAGE02015245.1 | 87.37 285 | 33 | 3  | 2752 |
| 3034 110266 109983 1e-85  | 324            |           |    |    |      |
| gi 33285929 gb AY223844.1 | AAGE02015245.1 | 87.50 128 | 14 | 2  | 2866 |
| 2991 129245 129118 2e-32  | 147            |           |    |    |      |
| gi 33285929 gb AY223844.1 | AAGE02015245.1 | 89.25 93  | 10 | 0  | 2760 |
| 2852 163013 162921 2e-23  | 117            |           |    |    |      |
| gi 33285929 gb AY223844.1 | AAGE02013712.1 | 87.63 283 | 30 | 5  | 2756 |
| 3035 50527 50807 1e-85    | 324            |           |    |    |      |
| gi 33285929 gb AY223844.1 | AAGE02013712.1 | 88.79 232 | 18 | 5  | 2764 |
| 2990 35861 36089 8e-72    | 278            |           |    |    |      |
| gi 33285929 gb AY223844.1 | AAGE02013618.1 | 87.20 289 | 32 | 5  | 2751 |
| 3036 4415 4701 1e-85      | 324            |           |    |    |      |
| gi 33285929 gb AY223844.1 | AAGE02013291.1 | 87.37 285 | 33 | 3  | 2753 |
| 3035 6376 6659 1e-85      | 324            |           |    |    |      |
| gi 33285929 gb AY223844.1 | AAGE02013291.1 | 86.42 243 | 28 | 4  | 2751 |
| 2990 2538 2778 8e-67      | 261            |           |    |    |      |
| gi 33285929 gb AY223844.1 | AAGE02013158.1 | 87.63 283 | 30 | 5  | 2756 |
| 3035 3448 3168 1e-85      | 324            |           |    |    |      |
| gi 33285929 gb AY223844.1 | AAGE02013158.1 | 86.52 282 | 35 | 3  | 2756 |
| 3035 83233 82953 1e-80    | 307            |           |    |    |      |
| gi 33285929 gb AY223844.1 | AAGE02012946.1 | 87.37 285 | 33 | 3  | 2753 |
| 3035 541 824 1e-85        | 324            |           |    |    |      |
| gi 33285929 gb AY223844.1 | AAGE02012946.1 | 82.72 162 | 18 | 4  | 2750 |
| 2908 7195 7041 5e-29      | 135            |           |    |    |      |
| gi 33285929 gb AY223844.1 | AAGE02011955.1 | 87.37 285 | 33 | 3  | 2753 |
| 3035 114186 114469 1e-85  | 324            |           |    |    |      |
| gi 33285929 gb AY223844.1 | AAGE02011955.1 | 90.28 247 | 17 | 6  | 2751 |
| 2990 55835 55589 2e-83    | 316            |           |    |    |      |
| gi 33285929 gb AY223844.1 | AAGE02011955.1 | 87.35 245 | 25 | 6  | 2750 |
| 2988 114088 113844 3e-71  | 276            |           |    |    |      |
| gi 33285929 gb AY223844.1 | AAGE02011955.1 | 86.53 245 | 26 | 6  | 2752 |
| 2990 53609 53852 2e-67    | 263            |           |    |    |      |
| gi 33285929 gb AY223844.1 | AAGE02011503.1 | 87.37 285 | 33 | 3  | 2753 |
| 3035 2813 2530 1e-85      | 324            |           |    |    |      |
| gi 33285929 gb AY223844.1 | AAGE02011410.1 | 87.59 282 | 32 | 3  | 2756 |
| 3035 24910 24630 1e-85    | 324            |           |    |    |      |
| gi 33285929 gb AY223844.1 | AAGE02011410.1 | 85.48 248 | 30 | 6  | 2748 |
| 2990 19816 20062 1e-64    | 254            |           |    |    |      |
| gi 33285929 gb AY223844.1 | AAGE02011334.1 | 87.37 285 | 33 | 3  | 2753 |
| 3035 33083 32800 1e-85    | 324            |           |    |    |      |
| gi 33285929 gb AY223844.1 | AAGE02011237.1 | 86.99 292 | 33 | 5  | 2748 |
| 3035 39971 39681 1e-85    | 324            |           |    |    |      |

|                              |                |           |    |   |      |
|------------------------------|----------------|-----------|----|---|------|
| gi 33285929 gb AY223844.1    | AAGE02011237.1 | 88.75 240 | 21 | 6 | 2757 |
| 2990 5926 5687 4e-75 289     |                |           |    |   |      |
| gi 33285929 gb AY223844.1    | AAGE02010459.1 | 87.15 288 | 34 | 3 | 2750 |
| 3035 47558 47844 1e-85 324   |                |           |    |   |      |
| gi 33285929 gb AY223844.1    | AAGE02010459.1 | 91.43 70  | 5  | 1 | 2922 |
| 2990 12522 12591 9e-17 95.3  |                |           |    |   |      |
| gi 33285929 gb AY223844.1    | AAGE02010346.1 | 87.15 288 | 33 | 4 | 2751 |
| 3035 26345 26059 1e-85 324   |                |           |    |   |      |
| gi 33285929 gb AY223844.1    | AAGE02010346.1 | 89.67 242 | 19 | 6 | 2755 |
| 2990 7936 7695 1e-79 303     |                |           |    |   |      |
| gi 33285929 gb AY223844.1    | AAGE02008462.1 | 86.73 294 | 35 | 4 | 2753 |
| 3044 299223 299514 1e-85 324 |                |           |    |   |      |
| gi 33285929 gb AY223844.1    | AAGE02008462.1 | 89.17 240 | 19 | 5 | 2757 |
| 2990 175944 176182 3e-76 292 |                |           |    |   |      |
| gi 33285929 gb AY223844.1    | AAGE02008462.1 | 85.16 283 | 37 | 5 | 2756 |
| 3035 33476 33756 5e-74 285   |                |           |    |   |      |
| gi 33285929 gb AY223844.1    | AAGE02008462.1 | 86.97 238 | 26 | 5 | 2758 |
| 2990 279266 279503 2e-67 263 |                |           |    |   |      |
| gi 33285929 gb AY223844.1    | AAGE02008462.1 | 85.71 252 | 31 | 5 | 2751 |
| 2997 155103 154852 8e-67 261 |                |           |    |   |      |
| gi 33285929 gb AY223844.1    | AAGE02008462.1 | 87.50 224 | 22 | 5 | 2751 |
| 2970 255430 255209 1e-64 254 |                |           |    |   |      |
| gi 33285929 gb AY223844.1    | AAGE02008462.1 | 88.00 200 | 19 | 5 | 2796 |
| 2990 528020 528219 6e-58 231 |                |           |    |   |      |
| gi 33285929 gb AY223844.1    | AAGE02008462.1 | 83.20 244 | 36 | 5 | 2751 |
| 2989 320202 319959 5e-54 219 |                |           |    |   |      |
| gi 33285929 gb AY223844.1    | AAGE02008462.1 | 86.54 156 | 16 | 5 | 2839 |
| 2990 164354 164508 2e-38 167 |                |           |    |   |      |
| gi 33285929 gb AY223844.1    | AAGE02008462.1 | 88.62 123 | 12 | 2 | 2755 |
| 2875 487956 487834 7e-33 148 |                |           |    |   |      |
| gi 33285929 gb AY223844.1    | AAGE02008462.1 | 92.31 78  | 5  | 1 | 2914 |
| 2990 409996 409919 3e-21 110 |                |           |    |   |      |
| gi 33285929 gb AY223844.1    | AAGE02008262.1 | 90.98 244 | 16 | 6 | 2753 |
| 2990 14333 14576 1e-85 324   |                |           |    |   |      |
| gi 33285929 gb AY223844.1    | AAGE02008103.1 | 87.20 289 | 31 | 6 | 2746 |
| 3034 20037 19755 1e-85 324   |                |           |    |   |      |
| gi 33285929 gb AY223844.1    | AAGE02008103.1 | 84.41 295 | 41 | 5 | 2748 |
| 3039 5679 5387 5e-74 285     |                |           |    |   |      |
| gi 33285929 gb AY223844.1    | AAGE02007562.1 | 87.37 285 | 33 | 3 | 2753 |
| 3035 62844 63127 1e-85 324   |                |           |    |   |      |
| gi 33285929 gb AY223844.1    | AAGE02007562.1 | 85.31 245 | 31 | 5 | 2751 |
| 2990 9477 9233 6e-63 248     |                |           |    |   |      |
| gi 33285929 gb AY223844.1    | AAGE02007176.1 | 87.15 288 | 33 | 4 | 2751 |
| 3035 15500 15786 1e-85 324   |                |           |    |   |      |
| gi 33285929 gb AY223844.1    | AAGE02005584.1 | 87.41 286 | 31 | 5 | 2753 |
| 3035 146891 146608 1e-85 324 |                |           |    |   |      |
| gi 33285929 gb AY223844.1    | AAGE02005584.1 | 79.72 217 | 31 | 9 | 2751 |
| 2955 47652 47867 9e-32 145   |                |           |    |   |      |
| gi 33285929 gb AY223844.1    | AAGE02005584.1 | 91.67 84  | 6  | 1 | 2908 |
| 2990 44274 44191 7e-23 115   |                |           |    |   |      |
| gi 33285929 gb AY223844.1    | AAGE02004715.1 | 87.37 285 | 32 | 4 | 2757 |
| 3038 53191 52908 1e-85 324   |                |           |    |   |      |

|                           |                |           |    |    |      |
|---------------------------|----------------|-----------|----|----|------|
| gi 33285929 gb AY223844.1 | AAGE02004487.1 | 87.37 285 | 33 | 3  | 2753 |
| 3035 159078 158795        | 1e-85 324      |           |    |    |      |
| gi 33285929 gb AY223844.1 | AAGE02004487.1 | 88.79 214 | 19 | 5  | 2765 |
| 2973 139209 138996        | 1e-65 257      |           |    |    |      |
| gi 33285929 gb AY223844.1 | AAGE02004487.1 | 84.43 212 | 29 | 4  | 2757 |
| 2964 90195 89984          | 4e-50 206      |           |    |    |      |
| gi 33285929 gb AY223844.1 | AAGE02004487.1 | 80.48 210 | 26 | 10 | 2786 |
| 2990 162267 162466        | 2e-32 147      |           |    |    |      |
| gi 33285929 gb AY223844.1 | AAGE02004487.1 | 84.67 150 | 18 | 3  | 2751 |
| 2895 18061 17912          | 9e-32 145      |           |    |    |      |
| gi 33285929 gb AY223844.1 | AAGE02004487.1 | 94.92 59  | 3  | 0  | 2910 |
| 2968 56252 56194          | 3e-16 93.5     |           |    |    |      |
| gi 33285929 gb AY223844.1 | AAGE02003459.1 | 86.73 294 | 35 | 4  | 2751 |
| 3041 38174 38466          | 1e-85 324      |           |    |    |      |
| gi 33285929 gb AY223844.1 | AAGE02003459.1 | 84.77 243 | 31 | 6  | 2754 |
| 2990 149863 149621        | 4e-60 239      |           |    |    |      |
| gi 33285929 gb AY223844.1 | AAGE02003459.1 | 80.68 264 | 36 | 11 | 2755 |
| 3013 114581 114834        | 1e-45 191      |           |    |    |      |
| gi 33285929 gb AY223844.1 | AAGE02003299.1 | 87.37 285 | 33 | 3  | 2753 |
| 3035 72469 72752          | 1e-85 324      |           |    |    |      |
| gi 33285929 gb AY223844.1 | AAGE02003299.1 | 85.17 236 | 25 | 7  | 2759 |
| 2990 53723 53494          | 2e-58 233      |           |    |    |      |
| gi 33285929 gb AY223844.1 | AAGE02002925.1 | 87.41 286 | 31 | 5  | 2753 |
| 3035 13685 13402          | 1e-85 324      |           |    |    |      |
| gi 33285929 gb AY223844.1 | AAGE02002925.1 | 82.72 243 | 30 | 8  | 2752 |
| 2990 40632 40866          | 4e-50 206      |           |    |    |      |
| gi 33285929 gb AY223844.1 | AAGE02002675.1 | 87.20 289 | 32 | 5  | 2751 |
| 3036 91461 91175          | 1e-85 324      |           |    |    |      |
| gi 33285929 gb AY223844.1 | AAGE02002675.1 | 88.75 240 | 21 | 6  | 2757 |
| 2990 116056 116295        | 4e-75 289      |           |    |    |      |
| gi 33285929 gb AY223844.1 | AAGE02002675.1 | 86.41 103 | 11 | 3  | 2791 |
| 2890 16524 16626          | 3e-21 110      |           |    |    |      |
| gi 33285929 gb AY223844.1 | AAGE02002549.1 | 86.73 294 | 35 | 4  | 2755 |
| 3045 12816 13108          | 1e-85 324      |           |    |    |      |
| gi 33285929 gb AY223844.1 | AAGE02002275.1 | 87.59 282 | 32 | 3  | 2756 |
| 3035 15120 15400          | 1e-85 324      |           |    |    |      |
| gi 33285929 gb AY223844.1 | AAGE02001270.1 | 87.15 288 | 33 | 4  | 2750 |
| 3035 86971 87256          | 1e-85 324      |           |    |    |      |
| gi 33285929 gb AY223844.1 | AAGE02001270.1 | 86.22 283 | 30 | 8  | 2758 |
| 3035 182562 182284        | 6e-78 298      |           |    |    |      |
| gi 33285929 gb AY223844.1 | AAGE02001270.1 | 89.27 233 | 20 | 5  | 2758 |
| 2985 134276 134508        | 1e-74 287      |           |    |    |      |
| gi 33285929 gb AY223844.1 | AAGE02001270.1 | 86.86 175 | 17 | 6  | 2822 |
| 2990 218938 218764        | 1e-45 191      |           |    |    |      |
| gi 33285929 gb AY223844.1 | AAGE02001034.1 | 87.15 288 | 33 | 4  | 2751 |
| 3035 78191 77905          | 1e-85 324      |           |    |    |      |
| gi 33285929 gb AY223844.1 | AAGE02001034.1 | 82.81 285 | 31 | 9  | 2751 |
| 3032 35886 36155          | 4e-60 239      |           |    |    |      |
| gi 33285929 gb AY223844.1 | AAGE02001034.1 | 91.06 123 | 9  | 2  | 2751 |
| 2871 96995 97117          | 7e-38 165      |           |    |    |      |
| gi 33285929 gb AY223844.1 | AAGE02000252.1 | 86.99 292 | 32 | 5  | 2746 |
| 3035 257969 257682        | 1e-85 324      |           |    |    |      |

|                           |                |           |    |    |      |
|---------------------------|----------------|-----------|----|----|------|
| gi 33285929 gb AY223844.1 | AAGE02000252.1 | 86.76 287 | 35 | 3  | 2751 |
| 3035 383065 383350        | 2e-83 316      |           |    |    |      |
| gi 33285929 gb AY223844.1 | AAGE02000252.1 | 82.98 235 | 25 | 7  | 2757 |
| 2990 411640 411420        | 6e-48 198      |           |    |    |      |
| gi 33285929 gb AY223844.1 | AAGE02000252.1 | 85.79 183 | 23 | 2  | 2755 |
| 2934 204444 204262        | 1e-45 191      |           |    |    |      |
| gi 33285929 gb AY223844.1 | AAGE02000252.1 | 88.89 126 | 12 | 2  | 2866 |
| 2989 71095 71220          | 1e-34 154      |           |    |    |      |
| gi 33285929 gb AY223844.1 | AAGE02000252.1 | 80.26 228 | 21 | 13 | 2751 |
| 2974 452680 452887        | 2e-33 150      |           |    |    |      |
| gi 33285929 gb AY223844.1 | AAGE02000252.1 | 88.10 84  | 9  | 1  | 2908 |
| 2990 252142 252225        | 7e-18 99.0     |           |    |    |      |
| gi 33285929 gb AY223844.1 | AAGE02000246.1 | 87.63 283 | 30 | 5  | 2756 |
| 3035 35009 34729          | 1e-85 324      |           |    |    |      |
| gi 33285929 gb AY223844.1 | AAGE02032791.1 | 87.32 284 | 33 | 3  | 2751 |
| 3032 13827 13545          | 4e-85 322      |           |    |    |      |
| gi 33285929 gb AY223844.1 | AAGE02032791.1 | 90.30 237 | 17 | 5  | 2760 |
| 2990 2970 2734            | 4e-80 305      |           |    |    |      |
| gi 33285929 gb AY223844.1 | AAGE02032791.1 | 87.50 96  | 12 | 0  | 2757 |
| 2852 13483 13388          | 9e-22 111      |           |    |    |      |
| gi 33285929 gb AY223844.1 | AAGE02030822.1 | 87.11 287 | 34 | 3  | 2751 |
| 3035 11000 10715          | 4e-85 322      |           |    |    |      |
| gi 33285929 gb AY223844.1 | AAGE02030561.1 | 86.94 291 | 33 | 5  | 2749 |
| 3036 30620 30332          | 4e-85 322      |           |    |    |      |
| gi 33285929 gb AY223844.1 | AAGE02030520.1 | 90.65 246 | 17 | 6  | 2751 |
| 2990 87602 87357          | 4e-85 322      |           |    |    |      |
| gi 33285929 gb AY223844.1 | AAGE02030520.1 | 88.28 239 | 22 | 6  | 2758 |
| 2990 58194 58432          | 6e-73 281      |           |    |    |      |
| gi 33285929 gb AY223844.1 | AAGE02030520.1 | 97.14 35  | 1  | 0  | 3174 |
| 3208 73241 73207          | 3e-06 60.2     |           |    |    |      |
| gi 33285929 gb AY223844.1 | AAGE02030240.1 | 86.49 296 | 36 | 4  | 2742 |
| 3035 1984 2277            | 4e-85 322      |           |    |    |      |
| gi 33285929 gb AY223844.1 | AAGE02029716.1 | 87.15 288 | 31 | 6  | 2752 |
| 3035 14502 14787          | 4e-85 322      |           |    |    |      |
| gi 33285929 gb AY223844.1 | AAGE02029677.1 | 87.32 284 | 33 | 3  | 2754 |
| 3035 59106 59388          | 4e-85 322      |           |    |    |      |
| gi 33285929 gb AY223844.1 | AAGE02029677.1 | 85.66 279 | 36 | 4  | 2760 |
| 3035 138357 138080        | 1e-75 291      |           |    |    |      |
| gi 33285929 gb AY223844.1 | AAGE02029677.1 | 82.91 234 | 29 | 6  | 2760 |
| 2989 52695 52469          | 2e-48 200      |           |    |    |      |
| gi 33285929 gb AY223844.1 | AAGE02029677.1 | 91.89 111 | 8  | 1  | 2881 |
| 2990 107717 107607        | 1e-34 154      |           |    |    |      |
| gi 33285929 gb AY223844.1 | AAGE02027575.1 | 87.37 285 | 31 | 5  | 2754 |
| 3035 1933 1651            | 4e-85 322      |           |    |    |      |
| gi 33285929 gb AY223844.1 | AAGE02026724.1 | 87.11 287 | 33 | 4  | 2752 |
| 3035 77868 77583          | 4e-85 322      |           |    |    |      |
| gi 33285929 gb AY223844.1 | AAGE02026724.1 | 82.05 234 | 37 | 5  | 2760 |
| 2989 45201 45433          | 8e-47 195      |           |    |    |      |
| gi 33285929 gb AY223844.1 | AAGE02025307.1 | 87.11 287 | 34 | 3  | 2751 |
| 3035 178363 178078        | 4e-85 322      |           |    |    |      |
| gi 33285929 gb AY223844.1 | AAGE02025307.1 | 87.45 247 | 23 | 7  | 2758 |
| 2997 94386 94141          | 8e-72 278      |           |    |    |      |

|                              |                |           |    |   |      |
|------------------------------|----------------|-----------|----|---|------|
| gi 33285929 gb AY223844.1    | AAGE02025307.1 | 97.14 35  | 1  | 0 | 3174 |
| 3208 70042 70008 3e-06 60.2  |                |           |    |   |      |
| gi 33285929 gb AY223844.1    | AAGE02025074.1 | 87.11 287 | 34 | 3 | 2751 |
| 3035 10782 11067 4e-85 322   |                |           |    |   |      |
| gi 33285929 gb AY223844.1    | AAGE02024384.1 | 87.11 287 | 34 | 3 | 2751 |
| 3035 8105 7820 4e-85 322     |                |           |    |   |      |
| gi 33285929 gb AY223844.1    | AAGE02023054.1 | 87.32 284 | 33 | 3 | 2754 |
| 3035 28027 28309 4e-85 322   |                |           |    |   |      |
| gi 33285929 gb AY223844.1    | AAGE02023054.1 | 84.28 229 | 28 | 6 | 2760 |
| 2984 446 222 2e-53 217       |                |           |    |   |      |
| gi 33285929 gb AY223844.1    | AAGE02021931.1 | 87.11 287 | 33 | 4 | 2752 |
| 3035 1191 1476 4e-85 322     |                |           |    |   |      |
| gi 33285929 gb AY223844.1    | AAGE02021309.1 | 87.32 284 | 33 | 3 | 2754 |
| 3035 9330 9048 4e-85 322     |                |           |    |   |      |
| gi 33285929 gb AY223844.1    | AAGE02019566.1 | 87.32 284 | 33 | 3 | 2754 |
| 3035 8935 8653 4e-85 322     |                |           |    |   |      |
| gi 33285929 gb AY223844.1    | AAGE02019566.1 | 87.16 148 | 16 | 3 | 2751 |
| 2895 47528 47675 7e-38 165   |                |           |    |   |      |
| gi 33285929 gb AY223844.1    | AAGE02019566.1 | 86.32 95  | 12 | 1 | 2879 |
| 2973 44694 44601 5e-19 102   |                |           |    |   |      |
| gi 33285929 gb AY223844.1    | AAGE02019548.1 | 87.37 285 | 31 | 5 | 2758 |
| 3040 33990 33709 4e-85 322   |                |           |    |   |      |
| gi 33285929 gb AY223844.1    | AAGE02019548.1 | 85.95 242 | 27 | 5 | 2753 |
| 2990 21091 20853 5e-64 252   |                |           |    |   |      |
| gi 33285929 gb AY223844.1    | AAGE02018102.1 | 86.90 290 | 34 | 4 | 2754 |
| 3040 75603 75891 4e-85 322   |                |           |    |   |      |
| gi 33285929 gb AY223844.1    | AAGE02018102.1 | 88.21 246 | 23 | 6 | 2750 |
| 2990 101328 101084 4e-75 289 |                |           |    |   |      |
| gi 33285929 gb AY223844.1    | AAGE02018102.1 | 85.96 171 | 20 | 3 | 2807 |
| 2974 117957 117788 2e-42 180 |                |           |    |   |      |
| gi 33285929 gb AY223844.1    | AAGE02017449.1 | 87.15 288 | 32 | 5 | 2751 |
| 3035 80557 80842 4e-85 322   |                |           |    |   |      |
| gi 33285929 gb AY223844.1    | AAGE02017449.1 | 94.44 54  | 3  | 0 | 2752 |
| 2805 64944 64891 2e-13 84.2  |                |           |    |   |      |
| gi 33285929 gb AY223844.1    | AAGE02016709.1 | 86.90 290 | 34 | 4 | 2753 |
| 3039 38600 38312 4e-85 322   |                |           |    |   |      |
| gi 33285929 gb AY223844.1    | AAGE02016643.1 | 87.32 284 | 32 | 4 | 2751 |
| 3031 92486 92204 4e-85 322   |                |           |    |   |      |
| gi 33285929 gb AY223844.1    | AAGE02016643.1 | 88.79 223 | 21 | 4 | 2754 |
| 2972 19392 19614 1e-69 270   |                |           |    |   |      |
| gi 33285929 gb AY223844.1    | AAGE02016643.1 | 86.67 150 | 17 | 2 | 2754 |
| 2900 215290 215141 2e-37 163 |                |           |    |   |      |
| gi 33285929 gb AY223844.1    | AAGE02016643.1 | 86.61 127 | 15 | 2 | 2866 |
| 2990 189095 189221 4e-30 139 |                |           |    |   |      |
| gi 33285929 gb AY223844.1    | AAGE02016643.1 | 91.46 82  | 6  | 1 | 2909 |
| 2989 224277 224196 9e-22 111 |                |           |    |   |      |
| gi 33285929 gb AY223844.1    | AAGE02015690.1 | 87.32 284 | 33 | 3 | 2754 |
| 3035 136855 137137 4e-85 322 |                |           |    |   |      |
| gi 33285929 gb AY223844.1    | AAGE02015690.1 | 88.28 239 | 22 | 6 | 2758 |
| 2990 78453 78691 6e-73 281   |                |           |    |   |      |
| gi 33285929 gb AY223844.1    | AAGE02015690.1 | 92.05 88  | 5  | 2 | 2755 |
| 2840 163686 163773 4e-25 122 |                |           |    |   |      |



|                           |                |           |    |    |      |
|---------------------------|----------------|-----------|----|----|------|
| gi 33285929 gb AY223844.1 | AAGE02015421.1 | 87.32 284 | 32 | 4  | 2755 |
| 3035 161183 161465        | 4e-85 322      |           |    |    |      |
| gi 33285929 gb AY223844.1 | AAGE02014300.1 | 87.32 284 | 33 | 3  | 2754 |
| 3035 227177 226895        | 4e-85 322      |           |    |    |      |
| gi 33285929 gb AY223844.1 | AAGE02014300.1 | 82.69 283 | 43 | 6  | 2758 |
| 3036 91787 92067          | 2e-62 246      |           |    |    |      |
| gi 33285929 gb AY223844.1 | AAGE02014300.1 | 84.45 238 | 28 | 7  | 2758 |
| 2989 211575 211341        | 3e-56 226      |           |    |    |      |
| gi 33285929 gb AY223844.1 | AAGE02014300.1 | 87.50 176 | 18 | 3  | 2819 |
| 2990 245883 246058        | 2e-48 200      |           |    |    |      |
| gi 33285929 gb AY223844.1 | AAGE02014300.1 | 85.35 157 | 17 | 6  | 2839 |
| 2990 86734 86889          | 1e-35 158      |           |    |    |      |
| gi 33285929 gb AY223844.1 | AAGE02014225.1 | 87.32 284 | 33 | 3  | 2754 |
| 3035 81700 81982          | 4e-85 322      |           |    |    |      |
| gi 33285929 gb AY223844.1 | AAGE02014225.1 | 89.39 245 | 21 | 5  | 2751 |
| 2990 60730 60486          | 1e-79 303      |           |    |    |      |
| gi 33285929 gb AY223844.1 | AAGE02014073.1 | 87.37 285 | 31 | 5  | 2756 |
| 3037 110907 111189        | 4e-85 322      |           |    |    |      |
| gi 33285929 gb AY223844.1 | AAGE02014073.1 | 89.84 246 | 19 | 6  | 2751 |
| 2990 345963 345718        | 8e-82 311      |           |    |    |      |
| gi 33285929 gb AY223844.1 | AAGE02014073.1 | 85.89 248 | 28 | 7  | 2749 |
| 2989 194871 194624        | 1e-65 257      |           |    |    |      |
| gi 33285929 gb AY223844.1 | AAGE02014073.1 | 85.54 242 | 26 | 6  | 2754 |
| 2990 164172 163935        | 8e-62 244      |           |    |    |      |
| gi 33285929 gb AY223844.1 | AAGE02014073.1 | 82.37 278 | 33 | 15 | 2766 |
| 3030 205546 205820        | 8e-57 228      |           |    |    |      |
| gi 33285929 gb AY223844.1 | AAGE02014073.1 | 83.54 237 | 23 | 8  | 2758 |
| 2989 296745 296520        | 1e-50 207      |           |    |    |      |
| gi 33285929 gb AY223844.1 | AAGE02012897.1 | 87.11 287 | 34 | 3  | 2751 |
| 3035 79056 78771          | 4e-85 322      |           |    |    |      |
| gi 33285929 gb AY223844.1 | AAGE02012897.1 | 86.31 241 | 28 | 5  | 2755 |
| 2990 67769 68009          | 1e-65 257      |           |    |    |      |
| gi 33285929 gb AY223844.1 | AAGE02012402.1 | 87.37 285 | 31 | 5  | 2754 |
| 3035 9353 9635            | 4e-85 322      |           |    |    |      |
| gi 33285929 gb AY223844.1 | AAGE02012243.1 | 87.20 289 | 29 | 8  | 2752 |
| 3035 63354 63639          | 4e-85 322      |           |    |    |      |
| gi 33285929 gb AY223844.1 | AAGE02012243.1 | 80.00 235 | 31 | 10 | 2758 |
| 2990 68212 67992          | 3e-36 159      |           |    |    |      |
| gi 33285929 gb AY223844.1 | AAGE02012001.1 | 87.54 281 | 32 | 3  | 2757 |
| 3035 22326 22047          | 4e-85 322      |           |    |    |      |
| gi 33285929 gb AY223844.1 | AAGE02011778.1 | 87.11 287 | 33 | 4  | 2751 |
| 3035 20567 20283          | 4e-85 322      |           |    |    |      |
| gi 33285929 gb AY223844.1 | AAGE02011778.1 | 87.71 236 | 25 | 4  | 2759 |
| 2990 10983 10748          | 4e-70 272      |           |    |    |      |
| gi 33285929 gb AY223844.1 | AAGE02011648.1 | 87.32 284 | 33 | 3  | 2754 |
| 3035 28228 27946          | 4e-85 322      |           |    |    |      |
| gi 33285929 gb AY223844.1 | AAGE02011648.1 | 87.50 104 | 10 | 3  | 2888 |
| 2990 12792 12893          | 2e-23 117      |           |    |    |      |
| gi 33285929 gb AY223844.1 | AAGE02011648.1 | 91.76 85  | 5  | 2  | 2907 |
| 2990 13495 13578          | 2e-23 117      |           |    |    |      |
| gi 33285929 gb AY223844.1 | AAGE02010785.1 | 86.73 294 | 33 | 6  | 2758 |
| 3047 30705 30414          | 4e-85 322      |           |    |    |      |

|                              |                |           |    |    |      |
|------------------------------|----------------|-----------|----|----|------|
| gi 33285929 gb AY223844.1    | AAGE02010721.1 | 87.32 284 | 33 | 3  | 2752 |
| 3033 4821 4539 4e-85 322     |                |           |    |    |      |
| gi 33285929 gb AY223844.1    | AAGE02010721.1 | 89.87 237 | 18 | 6  | 2760 |
| 2990 32872 33108 2e-78 300   |                |           |    |    |      |
| gi 33285929 gb AY223844.1    | AAGE02010721.1 | 84.75 223 | 30 | 3  | 2755 |
| 2973 65255 65033 1e-54 220   |                |           |    |    |      |
| gi 33285929 gb AY223844.1    | AAGE02010572.1 | 87.11 287 | 34 | 3  | 2751 |
| 3035 96380 96095 4e-85 322   |                |           |    |    |      |
| gi 33285929 gb AY223844.1    | AAGE02010572.1 | 86.64 232 | 28 | 3  | 2756 |
| 2985 177287 177517 1e-64 254 |                |           |    |    |      |
| gi 33285929 gb AY223844.1    | AAGE02010572.1 | 85.12 242 | 29 | 7  | 2755 |
| 2990 69855 69615 1e-60 241   |                |           |    |    |      |
| gi 33285929 gb AY223844.1    | AAGE02010468.1 | 90.95 243 | 16 | 6  | 2754 |
| 2990 22410 22652 4e-85 322   |                |           |    |    |      |
| gi 33285929 gb AY223844.1    | AAGE02010468.1 | 84.10 283 | 35 | 6  | 2754 |
| 3035 64363 64636 6e-68 265   |                |           |    |    |      |
| gi 33285929 gb AY223844.1    | AAGE02010468.1 | 85.48 241 | 21 | 7  | 2756 |
| 2990 17838 17606 4e-60 239   |                |           |    |    |      |
| gi 33285929 gb AY223844.1    | AAGE02010468.1 | 88.29 111 | 13 | 0  | 2752 |
| 2862 64080 64190 2e-28 134   |                |           |    |    |      |
| gi 33285929 gb AY223844.1    | AAGE02010202.1 | 87.11 287 | 34 | 3  | 2751 |
| 3035 139465 139180 4e-85 322 |                |           |    |    |      |
| gi 33285929 gb AY223844.1    | AAGE02010202.1 | 88.38 241 | 24 | 3  | 2754 |
| 2990 191726 191966 1e-74 287 |                |           |    |    |      |
| gi 33285929 gb AY223844.1    | AAGE02010202.1 | 87.39 238 | 24 | 6  | 2758 |
| 2990 28130 28366 5e-69 268   |                |           |    |    |      |
| gi 33285929 gb AY223844.1    | AAGE02010202.1 | 91.67 60  | 4  | 1  | 2932 |
| 2990 11435 11376 7e-13 82.4  |                |           |    |    |      |
| gi 33285929 gb AY223844.1    | AAGE02010174.1 | 87.81 279 | 29 | 5  | 2760 |
| 3035 84621 84897 4e-85 322   |                |           |    |    |      |
| gi 33285929 gb AY223844.1    | AAGE02010174.1 | 82.70 185 | 25 | 7  | 2810 |
| 2989 66541 66723 1e-35 158   |                |           |    |    |      |
| gi 33285929 gb AY223844.1    | AAGE02009551.1 | 87.11 287 | 34 | 3  | 2751 |
| 3035 161111 160826 4e-85 322 |                |           |    |    |      |
| gi 33285929 gb AY223844.1    | AAGE02009551.1 | 88.89 207 | 20 | 3  | 2758 |
| 2961 135496 135290 5e-64 252 |                |           |    |    |      |
| gi 33285929 gb AY223844.1    | AAGE02009551.1 | 83.14 261 | 25 | 15 | 2737 |
| 2990 258193 258441 1e-54 220 |                |           |    |    |      |
| gi 33285929 gb AY223844.1    | AAGE02009551.1 | 91.40 93  | 8  | 0  | 2757 |
| 2849 11674 11582 9e-27 128   |                |           |    |    |      |
| gi 33285929 gb AY223844.1    | AAGE02009551.1 | 82.35 136 | 19 | 3  | 2761 |
| 2892 180923 180789 2e-22 113 |                |           |    |    |      |
| gi 33285929 gb AY223844.1    | AAGE02009551.1 | 97.14 35  | 1  | 0  | 3174 |
| 3208 12393 12427 3e-06 60.2  |                |           |    |    |      |
| gi 33285929 gb AY223844.1    | AAGE02009430.1 | 90.95 243 | 17 | 4  | 2753 |
| 2990 26458 26216 4e-85 322   |                |           |    |    |      |
| gi 33285929 gb AY223844.1    | AAGE02009430.1 | 84.43 244 | 32 | 6  | 2760 |
| 2997 32270 32027 5e-59 235   |                |           |    |    |      |
| gi 33285929 gb AY223844.1    | AAGE02009430.1 | 85.16 128 | 16 | 3  | 2866 |
| 2990 126978 127105 9e-27 128 |                |           |    |    |      |
| gi 33285929 gb AY223844.1    | AAGE02008949.1 | 87.11 287 | 34 | 3  | 2751 |
| 3035 1508 1793 4e-85 322     |                |           |    |    |      |

|    |                               |                |       |     |    |    |      |
|----|-------------------------------|----------------|-------|-----|----|----|------|
| gi | 33285929 gb AY223844.1        | AAGE02008949.1 | 87.02 | 285 | 33 | 4  | 2753 |
|    | 3035 8563 8281 5e-84 318      |                |       |     |    |    |      |
| gi | 33285929 gb AY223844.1        | AAGE02008949.1 | 87.92 | 240 | 22 | 6  | 2757 |
|    | 2990 760 998 3e-71 276        |                |       |     |    |    |      |
| gi | 33285929 gb AY223844.1        | AAGE02008949.1 | 82.86 | 245 | 27 | 8  | 2751 |
|    | 2990 11696 11462 4e-50 206    |                |       |     |    |    |      |
| gi | 33285929 gb AY223844.1        | AAGE02007906.1 | 87.11 | 287 | 34 | 3  | 2751 |
|    | 3035 83209 83494 4e-85 322    |                |       |     |    |    |      |
| gi | 33285929 gb AY223844.1        | AAGE02007906.1 | 87.03 | 239 | 25 | 6  | 2758 |
|    | 2990 19983 19745 6e-68 265    |                |       |     |    |    |      |
| gi | 33285929 gb AY223844.1        | AAGE02007906.1 | 85.71 | 238 | 28 | 6  | 2758 |
|    | 2990 161275 161039 2e-62 246  |                |       |     |    |    |      |
| gi | 33285929 gb AY223844.1        | AAGE02007906.1 | 80.00 | 105 | 16 | 4  | 2760 |
|    | 2861 119164 119062 4e-10 73.1 |                |       |     |    |    |      |
| gi | 33285929 gb AY223844.1        | AAGE02007906.1 | 97.30 | 37  | 1  | 0  | 3173 |
|    | 3209 129822 129786 2e-07 63.9 |                |       |     |    |    |      |
| gi | 33285929 gb AY223844.1        | AAGE02007859.1 | 87.11 | 287 | 34 | 3  | 2751 |
|    | 3035 49466 49751 4e-85 322    |                |       |     |    |    |      |
| gi | 33285929 gb AY223844.1        | AAGE02007859.1 | 89.43 | 246 | 19 | 7  | 2751 |
|    | 2990 109323 109567 1e-79 303  |                |       |     |    |    |      |
| gi | 33285929 gb AY223844.1        | AAGE02007859.1 | 86.23 | 247 | 28 | 5  | 2751 |
|    | 2991 324395 324149 2e-67 263  |                |       |     |    |    |      |
| gi | 33285929 gb AY223844.1        | AAGE02007859.1 | 85.34 | 191 | 20 | 6  | 2753 |
|    | 2936 251592 251403 1e-45 191  |                |       |     |    |    |      |
| gi | 33285929 gb AY223844.1        | AAGE02007859.1 | 79.92 | 249 | 31 | 12 | 2749 |
|    | 2990 68740 68976 7e-38 165    |                |       |     |    |    |      |
| gi | 33285929 gb AY223844.1        | AAGE02007859.1 | 89.13 | 46  | 4  | 1  | 2946 |
|    | 2990 325173 325218 4e-05 56.5 |                |       |     |    |    |      |
| gi | 33285929 gb AY223844.1        | AAGE02007105.1 | 87.54 | 281 | 32 | 3  | 2754 |
|    | 3032 58339 58060 4e-85 322    |                |       |     |    |    |      |
| gi | 33285929 gb AY223844.1        | AAGE02007105.1 | 88.80 | 250 | 20 | 8  | 2748 |
|    | 2990 63450 63202 2e-78 300    |                |       |     |    |    |      |
| gi | 33285929 gb AY223844.1        | AAGE02007105.1 | 88.00 | 250 | 22 | 8  | 2748 |
|    | 2990 53230 53478 4e-75 289    |                |       |     |    |    |      |
| gi | 33285929 gb AY223844.1        | AAGE02007105.1 | 85.19 | 162 | 16 | 6  | 2743 |
|    | 2900 180056 179899 3e-36 159  |                |       |     |    |    |      |
| gi | 33285929 gb AY223844.1        | AAGE02007004.1 | 87.11 | 287 | 34 | 3  | 2751 |
|    | 3035 131350 131635 4e-85 322  |                |       |     |    |    |      |
| gi | 33285929 gb AY223844.1        | AAGE02007004.1 | 86.52 | 282 | 34 | 4  | 2756 |
|    | 3034 6885 6605 1e-80 307      |                |       |     |    |    |      |
| gi | 33285929 gb AY223844.1        | AAGE02006959.1 | 87.11 | 287 | 34 | 3  | 2751 |
|    | 3035 79637 79352 4e-85 322    |                |       |     |    |    |      |
| gi | 33285929 gb AY223844.1        | AAGE02006959.1 | 85.91 | 220 | 27 | 3  | 2759 |
|    | 2974 225878 226097 6e-58 231  |                |       |     |    |    |      |
| gi | 33285929 gb AY223844.1        | AAGE02006959.1 | 88.17 | 93  | 8  | 2  | 2750 |
|    | 2841 49805 49895 1e-20 108    |                |       |     |    |    |      |
| gi | 33285929 gb AY223844.1        | AAGE02006945.1 | 87.11 | 287 | 33 | 4  | 2751 |
|    | 3035 12071 12355 4e-85 322    |                |       |     |    |    |      |
| gi | 33285929 gb AY223844.1        | AAGE02006431.1 | 87.54 | 281 | 32 | 3  | 2757 |
|    | 3035 92797 93076 4e-85 322    |                |       |     |    |    |      |
| gi | 33285929 gb AY223844.1        | AAGE02006431.1 | 97.44 | 39  | 1  | 0  | 2780 |
|    | 2818 99429 99391 2e-08 67.6   |                |       |     |    |    |      |

|    |                              |                |           |    |   |      |
|----|------------------------------|----------------|-----------|----|---|------|
| gi | 33285929 gb AY223844.1       | AAGE02006333.1 | 87.32 284 | 33 | 3 | 2754 |
|    | 3035 4871 5153 4e-85 322     |                |           |    |   |      |
| gi | 33285929 gb AY223844.1       | AAGE02006333.1 | 87.39 238 | 24 | 6 | 2758 |
|    | 2990 169114 169350 5e-69 268 |                |           |    |   |      |
| gi | 33285929 gb AY223844.1       | AAGE02006333.1 | 84.84 244 | 33 | 3 | 2751 |
|    | 2990 4552 4795 3e-61 243     |                |           |    |   |      |
| gi | 33285929 gb AY223844.1       | AAGE02006330.1 | 86.90 290 | 34 | 4 | 2755 |
|    | 3042 9015 8728 4e-85 322     |                |           |    |   |      |
| gi | 33285929 gb AY223844.1       | AAGE02006196.1 | 87.11 287 | 34 | 3 | 2751 |
|    | 3035 46806 46521 4e-85 322   |                |           |    |   |      |
| gi | 33285929 gb AY223844.1       | AAGE02005915.1 | 86.90 290 | 34 | 4 | 2755 |
|    | 3041 5763 5475 4e-85 322     |                |           |    |   |      |
| gi | 33285929 gb AY223844.1       | AAGE02005915.1 | 86.11 288 | 36 | 4 | 2751 |
|    | 3035 3284 2998 1e-80 307     |                |           |    |   |      |
| gi | 33285929 gb AY223844.1       | AAGE02005915.1 | 87.39 238 | 24 | 6 | 2758 |
|    | 2990 78676 78912 5e-69 268   |                |           |    |   |      |
| gi | 33285929 gb AY223844.1       | AAGE02005915.1 | 88.43 216 | 22 | 2 | 2761 |
|    | 2973 87780 87565 1e-65 257   |                |           |    |   |      |
| gi | 33285929 gb AY223844.1       | AAGE02005915.1 | 84.98 233 | 28 | 6 | 2764 |
|    | 2990 55628 55397 2e-57 230   |                |           |    |   |      |
| gi | 33285929 gb AY223844.1       | AAGE02005830.1 | 87.32 284 | 33 | 3 | 2754 |
|    | 3035 7238 7520 4e-85 322     |                |           |    |   |      |
| gi | 33285929 gb AY223844.1       | AAGE02005418.1 | 86.90 290 | 34 | 4 | 2753 |
|    | 3040 33728 33441 4e-85 322   |                |           |    |   |      |
| gi | 33285929 gb AY223844.1       | AAGE02005195.1 | 86.33 300 | 36 | 4 | 2745 |
|    | 3040 59083 58785 4e-85 322   |                |           |    |   |      |
| gi | 33285929 gb AY223844.1       | AAGE02005195.1 | 86.42 243 | 25 | 6 | 2757 |
|    | 2991 56954 57196 3e-66 259   |                |           |    |   |      |
| gi | 33285929 gb AY223844.1       | AAGE02005112.1 | 87.15 288 | 31 | 6 | 2751 |
|    | 3035 54931 54647 4e-85 322   |                |           |    |   |      |
| gi | 33285929 gb AY223844.1       | AAGE02005112.1 | 88.16 245 | 21 | 7 | 2753 |
|    | 2990 30155 30398 5e-74 285   |                |           |    |   |      |
| gi | 33285929 gb AY223844.1       | AAGE02004890.1 | 87.11 287 | 34 | 3 | 2751 |
|    | 3035 160546 160831 4e-85 322 |                |           |    |   |      |
| gi | 33285929 gb AY223844.1       | AAGE02004236.1 | 86.94 291 | 32 | 5 | 2749 |
|    | 3034 10386 10097 4e-85 322   |                |           |    |   |      |
| gi | 33285929 gb AY223844.1       | AAGE02003900.1 | 87.11 287 | 34 | 3 | 2751 |
|    | 3035 43180 43465 4e-85 322   |                |           |    |   |      |
| gi | 33285929 gb AY223844.1       | AAGE02003900.1 | 87.98 233 | 23 | 5 | 2763 |
|    | 2990 140340 140108 1e-69 270 |                |           |    |   |      |
| gi | 33285929 gb AY223844.1       | AAGE02003900.1 | 87.03 239 | 25 | 6 | 2758 |
|    | 2990 254481 254719 6e-68 265 |                |           |    |   |      |
| gi | 33285929 gb AY223844.1       | AAGE02003900.1 | 88.73 71  | 7  | 1 | 2921 |
|    | 2990 11027 11097 5e-14 86.1  |                |           |    |   |      |
| gi | 33285929 gb AY223844.1       | AAGE02003465.1 | 87.54 281 | 32 | 3 | 2756 |
|    | 3035 249690 249968 4e-85 322 |                |           |    |   |      |
| gi | 33285929 gb AY223844.1       | AAGE02003465.1 | 86.11 288 | 34 | 5 | 2756 |
|    | 3038 129909 130195 4e-80 305 |                |           |    |   |      |
| gi | 33285929 gb AY223844.1       | AAGE02003465.1 | 86.02 236 | 24 | 6 | 2760 |
|    | 2990 256957 257188 8e-62 244 |                |           |    |   |      |
| gi | 33285929 gb AY223844.1       | AAGE02003465.1 | 84.71 242 | 33 | 4 | 2753 |
|    | 2990 257571 257330 4e-60 239 |                |           |    |   |      |

|                              |                |       |     |    |   |      |
|------------------------------|----------------|-------|-----|----|---|------|
| gi 33285929 gb AY223844.1    | AAGE02003465.1 | 80.79 | 203 | 13 | 9 | 2753 |
| 2953 222537 222715 5e-29 135 |                |       |     |    |   |      |
| gi 33285929 gb AY223844.1    | AAGE02003404.1 | 87.50 | 280 | 33 | 2 | 2757 |
| 3035 5546 5824 4e-85 322     |                |       |     |    |   |      |
| gi 33285929 gb AY223844.1    | AAGE02003058.1 | 86.99 | 292 | 30 | 7 | 2751 |
| 3035 58160 58450 4e-85 322   |                |       |     |    |   |      |
| gi 33285929 gb AY223844.1    | AAGE02003058.1 | 83.96 | 293 | 41 | 5 | 2755 |
| 3044 8532 8821 3e-71 276     |                |       |     |    |   |      |
| gi 33285929 gb AY223844.1    | AAGE02002690.1 | 87.11 | 287 | 33 | 4 | 2752 |
| 3035 29793 29508 4e-85 322   |                |       |     |    |   |      |
| gi 33285929 gb AY223844.1    | AAGE02002690.1 | 86.67 | 210 | 20 | 7 | 2787 |
| 2990 32867 32660 3e-56 226   |                |       |     |    |   |      |
| gi 33285929 gb AY223844.1    | AAGE02002624.1 | 87.11 | 287 | 33 | 4 | 2754 |
| 3037 11376 11091 4e-85 322   |                |       |     |    |   |      |
| gi 33285929 gb AY223844.1    | AAGE02002396.1 | 87.20 | 289 | 30 | 7 | 2751 |
| 3034 25561 25275 4e-85 322   |                |       |     |    |   |      |
| gi 33285929 gb AY223844.1    | AAGE02002261.1 | 87.41 | 286 | 29 | 7 | 2754 |
| 3035 88846 88564 4e-85 322   |                |       |     |    |   |      |
| gi 33285929 gb AY223844.1    | AAGE02002133.1 | 87.15 | 288 | 32 | 5 | 2751 |
| 3035 33186 32901 4e-85 322   |                |       |     |    |   |      |
| gi 33285929 gb AY223844.1    | AAGE02001776.1 | 87.32 | 284 | 33 | 3 | 2754 |
| 3035 50461 50743 4e-85 322   |                |       |     |    |   |      |
| gi 33285929 gb AY223844.1    | AAGE02001776.1 | 82.81 | 256 | 30 | 9 | 2744 |
| 2992 77106 77354 2e-53 217   |                |       |     |    |   |      |
| gi 33285929 gb AY223844.1    | AAGE02001479.1 | 87.54 | 281 | 31 | 4 | 2757 |
| 3035 47935 47657 4e-85 322   |                |       |     |    |   |      |
| gi 33285929 gb AY223844.1    | AAGE02001479.1 | 89.50 | 238 | 18 | 6 | 2760 |
| 2990 15028 14791 8e-77 294   |                |       |     |    |   |      |
| gi 33285929 gb AY223844.1    | AAGE02001479.1 | 86.21 | 203 | 22 | 6 | 2758 |
| 2956 7639 7439 6e-53 215     |                |       |     |    |   |      |
| gi 33285929 gb AY223844.1    | AAGE02000784.1 | 87.59 | 282 | 30 | 5 | 2757 |
| 3035 69449 69170 4e-85 322   |                |       |     |    |   |      |
| gi 33285929 gb AY223844.1    | AAGE02000784.1 | 86.90 | 229 | 23 | 5 | 2754 |
| 2978 11935 11710 2e-63 250   |                |       |     |    |   |      |
| gi 33285929 gb AY223844.1    | AAGE02000674.1 | 87.54 | 281 | 32 | 3 | 2757 |
| 3035 43120 42841 4e-85 322   |                |       |     |    |   |      |
| gi 33285929 gb AY223844.1    | AAGE02032579.1 | 87.11 | 287 | 32 | 5 | 2751 |
| 3035 3409 3692 1e-84 320     |                |       |     |    |   |      |
| gi 33285929 gb AY223844.1    | AAGE02032567.1 | 87.11 | 287 | 31 | 6 | 2756 |
| 3038 9814 10098 1e-84 320    |                |       |     |    |   |      |
| gi 33285929 gb AY223844.1    | AAGE02030849.1 | 87.50 | 280 | 32 | 3 | 2758 |
| 3035 7228 6950 1e-84 320     |                |       |     |    |   |      |
| gi 33285929 gb AY223844.1    | AAGE02030608.1 | 87.28 | 283 | 33 | 3 | 2755 |
| 3035 9629 9348 1e-84 320     |                |       |     |    |   |      |
| gi 33285929 gb AY223844.1    | AAGE02028605.1 | 87.32 | 284 | 31 | 5 | 2755 |
| 3035 26488 26769 1e-84 320   |                |       |     |    |   |      |
| gi 33285929 gb AY223844.1    | AAGE02027245.1 | 87.32 | 284 | 31 | 5 | 2755 |
| 3035 7809 8090 1e-84 320     |                |       |     |    |   |      |
| gi 33285929 gb AY223844.1    | AAGE02026421.1 | 87.06 | 286 | 34 | 3 | 2752 |
| 3035 27895 28179 1e-84 320   |                |       |     |    |   |      |
| gi 33285929 gb AY223844.1    | AAGE02026421.1 | 88.03 | 234 | 23 | 5 | 2762 |
| 2990 78685 78452 4e-70 272   |                |       |     |    |   |      |

|                              |                |           |    |    |      |
|------------------------------|----------------|-----------|----|----|------|
| gi 33285929 gb AY223844.1    | AAGE02025946.1 | 87.06 286 | 34 | 3  | 2751 |
| 3034 16597 16313 1e-84 320   |                |           |    |    |      |
| gi 33285929 gb AY223844.1    | AAGE02023655.1 | 87.06 286 | 33 | 4  | 2752 |
| 3035 135993 136276 1e-84 320 |                |           |    |    |      |
| gi 33285929 gb AY223844.1    | AAGE02023655.1 | 83.54 243 | 34 | 5  | 2753 |
| 2990 154818 154577 4e-55 222 |                |           |    |    |      |
| gi 33285929 gb AY223844.1    | AAGE02023655.1 | 85.08 181 | 20 | 4  | 2760 |
| 2937 154219 154395 8e-42 178 |                |           |    |    |      |
| gi 33285929 gb AY223844.1    | AAGE02023655.1 | 85.06 154 | 18 | 4  | 2826 |
| 2974 27567 27720 5e-34 152   |                |           |    |    |      |
| gi 33285929 gb AY223844.1    | AAGE02023655.1 | 92.39 92  | 7  | 0  | 2761 |
| 2852 28395 28304 7e-28 132   |                |           |    |    |      |
| gi 33285929 gb AY223844.1    | AAGE02023655.1 | 91.30 92  | 8  | 0  | 2761 |
| 2852 122485 122576 3e-26 126 |                |           |    |    |      |
| gi 33285929 gb AY223844.1    | AAGE02023655.1 | 90.00 50  | 2  | 3  | 3162 |
| 3208 83945 83896 9e-07 62.1  |                |           |    |    |      |
| gi 33285929 gb AY223844.1    | AAGE02022731.1 | 87.37 285 | 28 | 7  | 2756 |
| 3036 10706 10426 1e-84 320   |                |           |    |    |      |
| gi 33285929 gb AY223844.1    | AAGE02022681.1 | 87.06 286 | 33 | 4  | 2752 |
| 3034 127550 127834 1e-84 320 |                |           |    |    |      |
| gi 33285929 gb AY223844.1    | AAGE02022681.1 | 87.03 239 | 25 | 6  | 2758 |
| 2990 30012 29774 6e-68 265   |                |           |    |    |      |
| gi 33285929 gb AY223844.1    | AAGE02022681.1 | 87.67 219 | 18 | 9  | 2779 |
| 2990 7194 7410 2e-62 246     |                |           |    |    |      |
| gi 33285929 gb AY223844.1    | AAGE02022681.1 | 87.32 205 | 21 | 5  | 2754 |
| 2953 160943 160739 2e-57 230 |                |           |    |    |      |
| gi 33285929 gb AY223844.1    | AAGE02021608.1 | 87.06 286 | 33 | 4  | 2753 |
| 3035 22368 22084 1e-84 320   |                |           |    |    |      |
| gi 33285929 gb AY223844.1    | AAGE02021608.1 | 89.08 238 | 20 | 6  | 2758 |
| 2989 27125 26888 1e-75 291   |                |           |    |    |      |
| gi 33285929 gb AY223844.1    | AAGE02021493.1 | 87.50 280 | 32 | 3  | 2757 |
| 3034 12966 12688 1e-84 320   |                |           |    |    |      |
| gi 33285929 gb AY223844.1    | AAGE02020276.1 | 87.28 283 | 33 | 3  | 2755 |
| 3035 15366 15647 1e-84 320   |                |           |    |    |      |
| gi 33285929 gb AY223844.1    | AAGE02020276.1 | 83.53 249 | 31 | 9  | 2752 |
| 2990 35579 35331 1e-55 224   |                |           |    |    |      |
| gi 33285929 gb AY223844.1    | AAGE02020276.1 | 92.86 84  | 5  | 1  | 2909 |
| 2991 26975 27058 1e-24 121   |                |           |    |    |      |
| gi 33285929 gb AY223844.1    | AAGE02020108.1 | 87.28 283 | 33 | 3  | 2755 |
| 3035 83500 83219 1e-84 320   |                |           |    |    |      |
| gi 33285929 gb AY223844.1    | AAGE02019593.1 | 87.32 284 | 31 | 5  | 2755 |
| 3035 52075 52356 1e-84 320   |                |           |    |    |      |
| gi 33285929 gb AY223844.1    | AAGE02019593.1 | 87.30 244 | 27 | 3  | 2751 |
| 2990 22254 22011 3e-71 276   |                |           |    |    |      |
| gi 33285929 gb AY223844.1    | AAGE02019593.1 | 83.16 285 | 36 | 8  | 2754 |
| 3035 66243 66518 2e-63 250   |                |           |    |    |      |
| gi 33285929 gb AY223844.1    | AAGE02018782.1 | 87.06 286 | 34 | 3  | 2752 |
| 3035 9938 9654 1e-84 320     |                |           |    |    |      |
| gi 33285929 gb AY223844.1    | AAGE02018782.1 | 80.85 235 | 33 | 10 | 2760 |
| 2990 46315 46089 1e-40 174   |                |           |    |    |      |
| gi 33285929 gb AY223844.1    | AAGE02018247.1 | 87.54 281 | 30 | 5  | 2759 |
| 3036 15489 15767 1e-84 320   |                |           |    |    |      |

|                               |                |       |     |    |   |      |
|-------------------------------|----------------|-------|-----|----|---|------|
| gi 33285929 gb AY223844.1     | AAGE02018247.1 | 86.22 | 283 | 36 | 3 | 2755 |
| 3035 151017 150736 1e-79 303  |                |       |     |    |   |      |
| gi 33285929 gb AY223844.1     | AAGE02017119.1 | 87.06 | 286 | 33 | 4 | 2756 |
| 3038 23823 23539 1e-84 320    |                |       |     |    |   |      |
| gi 33285929 gb AY223844.1     | AAGE02017119.1 | 87.30 | 244 | 27 | 4 | 2751 |
| 2990 48055 47812 3e-71 276    |                |       |     |    |   |      |
| gi 33285929 gb AY223844.1     | AAGE02017114.1 | 87.28 | 283 | 33 | 3 | 2755 |
| 3035 19108 19389 1e-84 320    |                |       |     |    |   |      |
| gi 33285929 gb AY223844.1     | AAGE02017114.1 | 87.21 | 219 | 25 | 2 | 2760 |
| 2975 39320 39102 2e-62 246    |                |       |     |    |   |      |
| gi 33285929 gb AY223844.1     | AAGE02017114.1 | 86.94 | 222 | 25 | 4 | 2757 |
| 2974 144058 143837 2e-62 246  |                |       |     |    |   |      |
| gi 33285929 gb AY223844.1     | AAGE02017114.1 | 84.25 | 127 | 18 | 2 | 2866 |
| 2990 153537 153663 4e-25 122  |                |       |     |    |   |      |
| gi 33285929 gb AY223844.1     | AAGE02016205.1 | 87.32 | 284 | 31 | 5 | 2754 |
| 3035 12231 11951 1e-84 320    |                |       |     |    |   |      |
| gi 33285929 gb AY223844.1     | AAGE02015593.1 | 87.50 | 280 | 32 | 3 | 2758 |
| 3035 15754 15476 1e-84 320    |                |       |     |    |   |      |
| gi 33285929 gb AY223844.1     | AAGE02015593.1 | 85.02 | 247 | 29 | 7 | 2752 |
| 2990 27539 27785 8e-62 244    |                |       |     |    |   |      |
| gi 33285929 gb AY223844.1     | AAGE02014705.1 | 87.32 | 284 | 31 | 4 | 2754 |
| 3034 877 596 1e-84 320        |                |       |     |    |   |      |
| gi 33285929 gb AY223844.1     | AAGE02013697.1 | 86.90 | 290 | 33 | 5 | 2749 |
| 3035 62128 62415 1e-84 320    |                |       |     |    |   |      |
| gi 33285929 gb AY223844.1     | AAGE02013697.1 | 88.56 | 236 | 20 | 7 | 2761 |
| 2990 80748 80982 2e-72 279    |                |       |     |    |   |      |
| gi 33285929 gb AY223844.1     | AAGE02013697.1 | 89.29 | 112 | 12 | 0 | 2751 |
| 2862 45542 45431 1e-30 141    |                |       |     |    |   |      |
| gi 33285929 gb AY223844.1     | AAGE02013444.1 | 87.28 | 283 | 33 | 3 | 2755 |
| 3035 10349 10630 1e-84 320    |                |       |     |    |   |      |
| gi 33285929 gb AY223844.1     | AAGE02012234.1 | 90.57 | 244 | 19 | 4 | 2751 |
| 2990 38907 39150 1e-84 320    |                |       |     |    |   |      |
| gi 33285929 gb AY223844.1     | AAGE02012234.1 | 85.46 | 282 | 37 | 4 | 2754 |
| 3032 428774 429054 1e-75 291  |                |       |     |    |   |      |
| gi 33285929 gb AY223844.1     | AAGE02012234.1 | 94.44 | 54  | 3  | 0 | 2920 |
| 2973 463159 463106 2e-13 84.2 |                |       |     |    |   |      |
| gi 33285929 gb AY223844.1     | AAGE02009793.1 | 90.91 | 242 | 16 | 5 | 2755 |
| 2990 9996 10237 1e-84 320     |                |       |     |    |   |      |
| gi 33285929 gb AY223844.1     | AAGE02009777.1 | 87.06 | 286 | 33 | 4 | 2753 |
| 3035 10706 10422 1e-84 320    |                |       |     |    |   |      |
| gi 33285929 gb AY223844.1     | AAGE02009439.1 | 87.77 | 278 | 29 | 5 | 2753 |
| 3027 16511 16236 1e-84 320    |                |       |     |    |   |      |
| gi 33285929 gb AY223844.1     | AAGE02009439.1 | 84.86 | 284 | 39 | 4 | 2755 |
| 3035 82708 82990 2e-73 283    |                |       |     |    |   |      |
| gi 33285929 gb AY223844.1     | AAGE02009439.1 | 84.86 | 284 | 39 | 4 | 2755 |
| 3035 96833 97115 2e-73 283    |                |       |     |    |   |      |
| gi 33285929 gb AY223844.1     | AAGE02009439.1 | 85.61 | 139 | 19 | 1 | 2869 |
| 3006 93776 93914 9e-32 145    |                |       |     |    |   |      |
| gi 33285929 gb AY223844.1     | AAGE02009170.1 | 87.28 | 283 | 33 | 3 | 2755 |
| 3035 166835 167116 1e-84 320  |                |       |     |    |   |      |
| gi 33285929 gb AY223844.1     | AAGE02009170.1 | 87.39 | 238 | 23 | 5 | 2760 |
| 2990 134943 135180 2e-68 267  |                |       |     |    |   |      |

|                               |                |       |     |    |    |      |
|-------------------------------|----------------|-------|-----|----|----|------|
| gi 33285929 gb AY223844.1     | AAGE02009170.1 | 86.38 | 213 | 24 | 4  | 2783 |
| 2990 88506 88294 8e-57 228    |                |       |     |    |    |      |
| gi 33285929 gb AY223844.1     | AAGE02009170.1 | 84.30 | 172 | 24 | 3  | 2753 |
| 2921 48366 48537 7e-38 165    |                |       |     |    |    |      |
| gi 33285929 gb AY223844.1     | AAGE02009170.1 | 93.98 | 83  | 5  | 0  | 2751 |
| 2833 84128 84210 3e-26 126    |                |       |     |    |    |      |
| gi 33285929 gb AY223844.1     | AAGE02009170.1 | 88.76 | 89  | 9  | 1  | 2903 |
| 2990 40969 41057 1e-20 108    |                |       |     |    |    |      |
| gi 33285929 gb AY223844.1     | AAGE02009170.1 | 97.14 | 35  | 1  | 0  | 3174 |
| 3208 112093 112059 3e-06 60.2 |                |       |     |    |    |      |
| gi 33285929 gb AY223844.1     | AAGE02007959.1 | 87.50 | 280 | 32 | 3  | 2758 |
| 3035 2918 2640 1e-84 320      |                |       |     |    |    |      |
| gi 33285929 gb AY223844.1     | AAGE02007959.1 | 86.92 | 237 | 26 | 5  | 2759 |
| 2990 22520 22756 8e-67 261    |                |       |     |    |    |      |
| gi 33285929 gb AY223844.1     | AAGE02006266.1 | 90.91 | 242 | 16 | 6  | 2755 |
| 2990 108146 108387 1e-84 320  |                |       |     |    |    |      |
| gi 33285929 gb AY223844.1     | AAGE02006081.1 | 87.28 | 283 | 32 | 4  | 2757 |
| 3036 18073 18354 1e-84 320    |                |       |     |    |    |      |
| gi 33285929 gb AY223844.1     | AAGE02006028.1 | 87.32 | 284 | 31 | 5  | 2754 |
| 3034 109726 109445 1e-84 320  |                |       |     |    |    |      |
| gi 33285929 gb AY223844.1     | AAGE02006028.1 | 82.28 | 237 | 36 | 5  | 2760 |
| 2990 42757 42993 2e-48 200    |                |       |     |    |    |      |
| gi 33285929 gb AY223844.1     | AAGE02006028.1 | 84.78 | 184 | 22 | 3  | 2808 |
| 2990 120233 120055 2e-42 180  |                |       |     |    |    |      |
| gi 33285929 gb AY223844.1     | AAGE02006028.1 | 93.59 | 78  | 4  | 1  | 2914 |
| 2990 417 340 7e-23 115        |                |       |     |    |    |      |
| gi 33285929 gb AY223844.1     | AAGE02005321.1 | 87.06 | 286 | 34 | 3  | 2752 |
| 3035 119030 118746 1e-84 320  |                |       |     |    |    |      |
| gi 33285929 gb AY223844.1     | AAGE02005321.1 | 86.13 | 238 | 26 | 7  | 2758 |
| 2990 283044 283279 2e-63 250  |                |       |     |    |    |      |
| gi 33285929 gb AY223844.1     | AAGE02005321.1 | 83.47 | 242 | 30 | 9  | 2757 |
| 2991 281190 281428 2e-53 217  |                |       |     |    |    |      |
| gi 33285929 gb AY223844.1     | AAGE02005321.1 | 81.10 | 254 | 19 | 12 | 2757 |
| 2981 22599 22346 3e-41 176    |                |       |     |    |    |      |
| gi 33285929 gb AY223844.1     | AAGE02005199.1 | 87.28 | 283 | 33 | 3  | 2755 |
| 3035 17169 17450 1e-84 320    |                |       |     |    |    |      |
| gi 33285929 gb AY223844.1     | AAGE02005199.1 | 87.27 | 220 | 24 | 4  | 2775 |
| 2990 49253 49034 6e-63 248    |                |       |     |    |    |      |
| gi 33285929 gb AY223844.1     | AAGE02005199.1 | 98.18 | 55  | 1  | 0  | 2798 |
| 2852 141232 141178 2e-17 97.1 |                |       |     |    |    |      |
| gi 33285929 gb AY223844.1     | AAGE02004971.1 | 87.50 | 280 | 32 | 3  | 2758 |
| 3035 13656 13378 1e-84 320    |                |       |     |    |    |      |
| gi 33285929 gb AY223844.1     | AAGE02004971.1 | 88.62 | 246 | 21 | 7  | 2751 |
| 2990 61776 62020 3e-76 292    |                |       |     |    |    |      |
| gi 33285929 gb AY223844.1     | AAGE02004971.1 | 91.46 | 82  | 6  | 1  | 2910 |
| 2990 68905 68824 9e-22 111    |                |       |     |    |    |      |
| gi 33285929 gb AY223844.1     | AAGE02004873.1 | 87.06 | 286 | 34 | 3  | 2752 |
| 3035 205321 205605 1e-84 320  |                |       |     |    |    |      |
| gi 33285929 gb AY223844.1     | AAGE02004873.1 | 89.63 | 241 | 20 | 5  | 2755 |
| 2990 416196 416436 5e-79 302  |                |       |     |    |    |      |
| gi 33285929 gb AY223844.1     | AAGE02004873.1 | 87.23 | 235 | 22 | 7  | 2760 |
| 2990 245740 245970 8e-67 261  |                |       |     |    |    |      |



|    |                               |                |           |    |   |      |
|----|-------------------------------|----------------|-----------|----|---|------|
| gi | 33285929 gb AY223844.1        | AAGE02004873.1 | 83.15 279 | 42 | 5 | 2759 |
|    | 3035 19037 19312 2e-63 250    |                |           |    |   |      |
| gi | 33285929 gb AY223844.1        | AAGE02004873.1 | 83.82 241 | 33 | 6 | 2756 |
|    | 2990 177730 177970 1e-55 224  |                |           |    |   |      |
| gi | 33285929 gb AY223844.1        | AAGE02004873.1 | 92.77 83  | 5  | 1 | 2909 |
|    | 2990 98502 98420 5e-24 119    |                |           |    |   |      |
| gi | 33285929 gb AY223844.1        | AAGE02004873.1 | 90.14 71  | 6  | 1 | 2921 |
|    | 2990 82798 82868 1e-15 91.6   |                |           |    |   |      |
| gi | 33285929 gb AY223844.1        | AAGE02004873.1 | 97.14 35  | 1  | 0 | 3174 |
|    | 3208 16618 16584 3e-06 60.2   |                |           |    |   |      |
| gi | 33285929 gb AY223844.1        | AAGE02004868.1 | 87.28 283 | 33 | 3 | 2755 |
|    | 3035 114978 115259 1e-84 320  |                |           |    |   |      |
| gi | 33285929 gb AY223844.1        | AAGE02004868.1 | 86.94 268 | 28 | 7 | 2756 |
|    | 3019 156755 156491 8e-77 294  |                |           |    |   |      |
| gi | 33285929 gb AY223844.1        | AAGE02004868.1 | 88.28 239 | 22 | 6 | 2757 |
|    | 2990 48541 48778 6e-73 281    |                |           |    |   |      |
| gi | 33285929 gb AY223844.1        | AAGE02004868.1 | 83.96 187 | 25 | 4 | 2750 |
|    | 2933 75175 75359 1e-40 174    |                |           |    |   |      |
| gi | 33285929 gb AY223844.1        | AAGE02004602.1 | 87.02 285 | 35 | 2 | 2752 |
|    | 3035 7904 7621 1e-84 320      |                |           |    |   |      |
| gi | 33285929 gb AY223844.1        | AAGE02004443.1 | 86.85 289 | 34 | 4 | 2753 |
|    | 3038 15004 14717 1e-84 320    |                |           |    |   |      |
| gi | 33285929 gb AY223844.1        | AAGE02004033.1 | 87.28 283 | 33 | 3 | 2755 |
|    | 3035 50195 50476 1e-84 320    |                |           |    |   |      |
| gi | 33285929 gb AY223844.1        | AAGE02004033.1 | 94.29 35  | 2  | 0 | 3174 |
|    | 3208 25756 25790 1e-04 54.7   |                |           |    |   |      |
| gi | 33285929 gb AY223844.1        | AAGE02003992.1 | 87.06 286 | 34 | 3 | 2752 |
|    | 3035 4121 4405 1e-84 320      |                |           |    |   |      |
| gi | 33285929 gb AY223844.1        | AAGE02003992.1 | 85.61 285 | 36 | 5 | 2754 |
|    | 3035 20227 20509 8e-77 294    |                |           |    |   |      |
| gi | 33285929 gb AY223844.1        | AAGE02003992.1 | 94.87 39  | 1  | 1 | 3171 |
|    | 3208 102545 102507 3e-06 60.2 |                |           |    |   |      |
| gi | 33285929 gb AY223844.1        | AAGE02003891.1 | 90.61 245 | 18 | 5 | 2751 |
|    | 2990 29385 29141 1e-84 320    |                |           |    |   |      |
| gi | 33285929 gb AY223844.1        | AAGE02003891.1 | 97.14 35  | 1  | 0 | 3174 |
|    | 3208 45109 45075 3e-06 60.2   |                |           |    |   |      |
| gi | 33285929 gb AY223844.1        | AAGE02003703.1 | 87.28 283 | 33 | 3 | 2755 |
|    | 3035 53631 53350 1e-84 320    |                |           |    |   |      |
| gi | 33285929 gb AY223844.1        | AAGE02003703.1 | 87.03 239 | 25 | 6 | 2757 |
|    | 2990 42356 42119 6e-68 265    |                |           |    |   |      |
| gi | 33285929 gb AY223844.1        | AAGE02003583.1 | 87.28 283 | 33 | 3 | 2755 |
|    | 3035 9015 8734 1e-84 320      |                |           |    |   |      |
| gi | 33285929 gb AY223844.1        | AAGE02003155.1 | 86.64 292 | 35 | 4 | 2751 |
|    | 3039 19743 19453 1e-84 320    |                |           |    |   |      |
| gi | 33285929 gb AY223844.1        | AAGE02002934.1 | 87.32 284 | 31 | 5 | 2755 |
|    | 3035 9624 9905 1e-84 320      |                |           |    |   |      |
| gi | 33285929 gb AY223844.1        | AAGE02002934.1 | 85.40 137 | 16 | 2 | 2777 |
|    | 2909 9490 9626 4e-30 139      |                |           |    |   |      |
| gi | 33285929 gb AY223844.1        | AAGE02002064.1 | 87.06 286 | 34 | 3 | 2752 |
|    | 3035 73933 74217 1e-84 320    |                |           |    |   |      |
| gi | 33285929 gb AY223844.1        | AAGE02002064.1 | 87.86 173 | 17 | 4 | 2821 |
|    | 2989 120634 120462 2e-48 200  |                |           |    |   |      |

|                              |                |       |     |    |    |      |
|------------------------------|----------------|-------|-----|----|----|------|
| gi 33285929 gb AY223844.1    | AAGE02001980.1 | 86.90 | 290 | 33 | 5  | 2750 |
| 3035 2139 2427 1e-84 320     |                |       |     |    |    |      |
| gi 33285929 gb AY223844.1    | AAGE02001910.1 | 87.06 | 286 | 34 | 3  | 2752 |
| 3035 30532 30248 1e-84 320   |                |       |     |    |    |      |
| gi 33285929 gb AY223844.1    | AAGE02001910.1 | 84.32 | 236 | 33 | 3  | 2758 |
| 2989 137709 137944 8e-57 228 |                |       |     |    |    |      |
| gi 33285929 gb AY223844.1    | AAGE02001754.1 | 87.37 | 285 | 29 | 7  | 2754 |
| 3035 10199 9919 1e-84 320    |                |       |     |    |    |      |
| gi 33285929 gb AY223844.1    | AAGE02001399.1 | 87.28 | 283 | 33 | 3  | 2755 |
| 3035 73772 73491 1e-84 320   |                |       |     |    |    |      |
| gi 33285929 gb AY223844.1    | AAGE02001399.1 | 84.03 | 238 | 23 | 10 | 2758 |
| 2990 91319 91092 6e-53 215   |                |       |     |    |    |      |
| gi 33285929 gb AY223844.1    | AAGE02001399.1 | 86.63 | 172 | 19 | 4  | 2823 |
| 2990 105196 105025 1e-44 187 |                |       |     |    |    |      |
| gi 33285929 gb AY223844.1    | AAGE02001172.1 | 87.28 | 283 | 32 | 4  | 2755 |
| 3035 93654 93374 1e-84 320   |                |       |     |    |    |      |
| gi 33285929 gb AY223844.1    | AAGE02001172.1 | 89.80 | 98  | 8  | 2  | 2757 |
| 2852 49659 49562 1e-25 124   |                |       |     |    |    |      |
| gi 33285929 gb AY223844.1    | AAGE02001159.1 | 87.11 | 287 | 31 | 6  | 2753 |
| 3035 11138 10854 1e-84 320   |                |       |     |    |    |      |
| gi 33285929 gb AY223844.1    | AAGE02001082.1 | 87.06 | 286 | 34 | 3  | 2751 |
| 3034 104216 103932 1e-84 320 |                |       |     |    |    |      |
| gi 33285929 gb AY223844.1    | AAGE02000873.1 | 87.50 | 280 | 32 | 3  | 2758 |
| 3035 28892 29170 1e-84 320   |                |       |     |    |    |      |
| gi 33285929 gb AY223844.1    | AAGE02000873.1 | 88.98 | 127 | 12 | 2  | 2866 |
| 2990 65390 65516 4e-35 156   |                |       |     |    |    |      |
| gi 33285929 gb AY223844.1    | AAGE02000418.1 | 87.11 | 287 | 32 | 5  | 2754 |
| 3037 38 322 1e-84 320        |                |       |     |    |    |      |
| gi 33285929 gb AY223844.1    | AAGE02000375.1 | 87.11 | 287 | 32 | 5  | 2751 |
| 3035 62592 62875 1e-84 320   |                |       |     |    |    |      |
| gi 33285929 gb AY223844.1    | AAGE02000375.1 | 89.58 | 240 | 18 | 6  | 2758 |
| 2990 9466 9227 6e-78 298     |                |       |     |    |    |      |
| gi 33285929 gb AY223844.1    | AAGE02000375.1 | 88.19 | 237 | 22 | 5  | 2760 |
| 2990 78924 78688 8e-72 278   |                |       |     |    |    |      |
| gi 33285929 gb AY223844.1    | AAGE02000375.1 | 86.59 | 246 | 27 | 6  | 2751 |
| 2990 39494 39739 2e-68 267   |                |       |     |    |    |      |
| gi 33285929 gb AY223844.1    | AAGE02000375.1 | 86.48 | 244 | 22 | 7  | 2757 |
| 2990 74915 75157 1e-65 257   |                |       |     |    |    |      |
| gi 33285929 gb AY223844.1    | AAGE02000375.1 | 85.36 | 239 | 30 | 4  | 2757 |
| 2990 109079 108841 3e-61 243 |                |       |     |    |    |      |
| gi 33285929 gb AY223844.1    | AAGE02000375.1 | 86.36 | 154 | 16 | 4  | 2757 |
| 2906 29179 29027 2e-37 163   |                |       |     |    |    |      |
| gi 33285929 gb AY223844.1    | AAGE02000265.1 | 87.06 | 286 | 34 | 3  | 2751 |
| 3034 130020 129736 1e-84 320 |                |       |     |    |    |      |
| gi 33285929 gb AY223844.1    | AAGE02000265.1 | 87.23 | 282 | 33 | 3  | 2756 |
| 3035 184997 184717 5e-84 318 |                |       |     |    |    |      |
| gi 33285929 gb AY223844.1    | AAGE02000265.1 | 84.03 | 238 | 27 | 6  | 2757 |
| 2989 110084 110315 5e-54 219 |                |       |     |    |    |      |
| gi 33285929 gb AY223844.1    | AAGE02000145.1 | 87.06 | 286 | 33 | 4  | 2753 |
| 3035 19389 19673 1e-84 320   |                |       |     |    |    |      |
| gi 33285929 gb AY223844.1    | AAGE02000035.1 | 86.90 | 290 | 32 | 6  | 2752 |
| 3038 35769 36055 1e-84 320   |                |       |     |    |    |      |

|    |  |          |  |    |  |            |  |                |       |     |    |    |      |
|----|--|----------|--|----|--|------------|--|----------------|-------|-----|----|----|------|
| gi |  | 33285929 |  | gb |  | AY223844.1 |  | AAGE02000035.1 | 86.89 | 244 | 28 | 3  | 2751 |
|    |  | 2990     |  |    |  | 3134       |  | 2891           | 1e-69 | 270 |    |    |      |
| gi |  | 33285929 |  | gb |  | AY223844.1 |  | AAGE02000035.1 | 85.65 | 237 | 27 | 6  | 2759 |
|    |  | 2990     |  |    |  | 49341      |  | 49575          | 3e-61 | 243 |    |    |      |
| gi |  | 33285929 |  | gb |  | AY223844.1 |  | AAGE02000003.1 | 90.57 | 244 | 19 | 3  | 2751 |
|    |  | 2990     |  |    |  | 32737      |  | 32494          | 1e-84 | 320 |    |    |      |
| gi |  | 33285929 |  | gb |  | AY223844.1 |  | AAGE02000003.1 | 84.90 | 298 | 35 | 8  | 2743 |
|    |  | 3033     |  |    |  | 31495      |  | 31201          | 3e-76 | 292 |    |    |      |
| gi |  | 33285929 |  | gb |  | AY223844.1 |  | AAGE02031868.1 | 87.28 | 283 | 30 | 6  | 2757 |
|    |  | 3035     |  |    |  | 14968      |  | 15248          | 5e-84 | 318 |    |    |      |
| gi |  | 33285929 |  | gb |  | AY223844.1 |  | AAGE02031478.1 | 87.28 | 283 | 30 | 6  | 2757 |
|    |  | 3035     |  |    |  | 34090      |  | 34370          | 5e-84 | 318 |    |    |      |
| gi |  | 33285929 |  | gb |  | AY223844.1 |  | AAGE02031122.1 | 86.81 | 288 | 34 | 4  | 2751 |
|    |  | 3035     |  |    |  | 12637      |  | 12923          | 5e-84 | 318 |    |    |      |
| gi |  | 33285929 |  | gb |  | AY223844.1 |  | AAGE02031122.1 | 88.14 | 236 | 22 | 5  | 2760 |
|    |  | 2990     |  |    |  | 3939       |  | 3705           | 3e-71 | 276 |    |    |      |
| gi |  | 33285929 |  | gb |  | AY223844.1 |  | AAGE02029578.1 | 86.39 | 294 | 37 | 3  | 2744 |
|    |  | 3035     |  |    |  | 8880       |  | 8588           | 5e-84 | 318 |    |    |      |
| gi |  | 33285929 |  | gb |  | AY223844.1 |  | AAGE02028493.1 | 87.02 | 285 | 33 | 4  | 2754 |
|    |  | 3035     |  |    |  | 19732      |  | 19449          | 5e-84 | 318 |    |    |      |
| gi |  | 33285929 |  | gb |  | AY223844.1 |  | AAGE02027500.1 | 87.02 | 285 | 33 | 4  | 2754 |
|    |  | 3035     |  |    |  | 150886     |  | 150603         | 5e-84 | 318 |    |    |      |
| gi |  | 33285929 |  | gb |  | AY223844.1 |  | AAGE02027500.1 | 83.82 | 241 | 26 | 9  | 2758 |
|    |  | 2990     |  |    |  | 146168     |  | 146403         | 2e-53 | 217 |    |    |      |
| gi |  | 33285929 |  | gb |  | AY223844.1 |  | AAGE02027500.1 | 80.63 | 253 | 35 | 6  | 2751 |
|    |  | 2989     |  |    |  | 102588     |  | 102336         | 2e-43 | 183 |    |    |      |
| gi |  | 33285929 |  | gb |  | AY223844.1 |  | AAGE02027500.1 | 88.24 | 136 | 11 | 4  | 2755 |
|    |  | 2886     |  |    |  | 132768     |  | 132902         | 1e-35 | 158 |    |    |      |
| gi |  | 33285929 |  | gb |  | AY223844.1 |  | AAGE02026729.1 | 87.23 | 282 | 33 | 3  | 2756 |
|    |  | 3035     |  |    |  | 42862      |  | 42582          | 5e-84 | 318 |    |    |      |
| gi |  | 33285929 |  | gb |  | AY223844.1 |  | AAGE02026729.1 | 85.41 | 233 | 30 | 3  | 2762 |
|    |  | 2990     |  |    |  | 24488      |  | 24720          | 4e-60 | 239 |    |    |      |
| gi |  | 33285929 |  | gb |  | AY223844.1 |  | AAGE02026020.1 | 86.81 | 288 | 34 | 4  | 2751 |
|    |  | 3035     |  |    |  | 4740       |  | 4454           | 5e-84 | 318 |    |    |      |
| gi |  | 33285929 |  | gb |  | AY223844.1 |  | AAGE02025407.1 | 87.15 | 288 | 28 | 8  | 2752 |
|    |  | 3035     |  |    |  | 55004      |  | 55286          | 5e-84 | 318 |    |    |      |
| gi |  | 33285929 |  | gb |  | AY223844.1 |  | AAGE02025407.1 | 85.20 | 223 | 28 | 5  | 2756 |
|    |  | 2974     |  |    |  | 100500     |  | 100721         | 1e-55 | 224 |    |    |      |
| gi |  | 33285929 |  | gb |  | AY223844.1 |  | AAGE02025407.1 | 82.35 | 238 | 18 | 10 | 2756 |
|    |  | 2990     |  |    |  | 63257      |  | 63473          | 5e-44 | 185 |    |    |      |
| gi |  | 33285929 |  | gb |  | AY223844.1 |  | AAGE02025407.1 | 91.76 | 85  | 7  | 0  | 2906 |
|    |  | 2990     |  |    |  | 159050     |  | 159134         | 5e-24 | 119 |    |    |      |
| gi |  | 33285929 |  | gb |  | AY223844.1 |  | AAGE02025391.1 | 87.02 | 285 | 34 | 3  | 2753 |
|    |  | 3035     |  |    |  | 5106       |  | 5389           | 5e-84 | 318 |    |    |      |
| gi |  | 33285929 |  | gb |  | AY223844.1 |  | AAGE02025391.1 | 90.46 | 241 | 19 | 4  | 2754 |
|    |  | 2990     |  |    |  | 34164      |  | 33924          | 6e-83 | 315 |    |    |      |
| gi |  | 33285929 |  | gb |  | AY223844.1 |  | AAGE02025332.1 | 87.02 | 285 | 33 | 4  | 2753 |
|    |  | 3035     |  |    |  | 8646       |  | 8364           | 5e-84 | 318 |    |    |      |
| gi |  | 33285929 |  | gb |  | AY223844.1 |  | AAGE02024957.1 | 87.23 | 282 | 32 | 4  | 2757 |
|    |  | 3035     |  |    |  | 5897       |  | 5617           | 5e-84 | 318 |    |    |      |
| gi |  | 33285929 |  | gb |  | AY223844.1 |  | AAGE02024957.1 | 86.89 | 244 | 28 | 3  | 2751 |
|    |  | 2990     |  |    |  | 7066       |  | 6823           | 1e-69 | 270 |    |    |      |

|                               |                |           |    |    |      |
|-------------------------------|----------------|-----------|----|----|------|
| gi 33285929 gb AY223844.1     | AAGE02023810.1 | 87.02 285 | 33 | 4  | 2755 |
| 3036 16922 16639 5e-84 318    |                |           |    |    |      |
| gi 33285929 gb AY223844.1     | AAGE02022025.1 | 87.02 285 | 34 | 3  | 2753 |
| 3035 162964 162681 5e-84 318  |                |           |    |    |      |
| gi 33285929 gb AY223844.1     | AAGE02022025.1 | 84.86 284 | 39 | 4  | 2756 |
| 3036 107148 107430 2e-73 283  |                |           |    |    |      |
| gi 33285929 gb AY223844.1     | AAGE02022025.1 | 85.71 238 | 28 | 6  | 2759 |
| 2990 136078 135841 2e-62 246  |                |           |    |    |      |
| gi 33285929 gb AY223844.1     | AAGE02022025.1 | 87.56 201 | 19 | 6  | 2795 |
| 2990 437310 437509 8e-57 228  |                |           |    |    |      |
| gi 33285929 gb AY223844.1     | AAGE02022025.1 | 90.43 94  | 9  | 0  | 2757 |
| 2850 409416 409509 1e-25 124  |                |           |    |    |      |
| gi 33285929 gb AY223844.1     | AAGE02022025.1 | 97.14 35  | 1  | 0  | 3174 |
| 3208 348281 348315 3e-06 60.2 |                |           |    |    |      |
| gi 33285929 gb AY223844.1     | AAGE02022020.1 | 90.57 244 | 18 | 4  | 2751 |
| 2990 37230 36988 5e-84 318    |                |           |    |    |      |
| gi 33285929 gb AY223844.1     | AAGE02022020.1 | 86.67 285 | 35 | 3  | 2753 |
| 3035 15268 15551 2e-82 313    |                |           |    |    |      |
| gi 33285929 gb AY223844.1     | AAGE02022020.1 | 86.48 244 | 29 | 4  | 2751 |
| 2990 24947 25190 6e-68 265    |                |           |    |    |      |
| gi 33285929 gb AY223844.1     | AAGE02021744.1 | 87.28 283 | 31 | 5  | 2755 |
| 3035 18035 17756 5e-84 318    |                |           |    |    |      |
| gi 33285929 gb AY223844.1     | AAGE02021744.1 | 83.27 281 | 38 | 8  | 2759 |
| 3035 25789 26064 2e-63 250    |                |           |    |    |      |
| gi 33285929 gb AY223844.1     | AAGE02021555.1 | 86.85 289 | 33 | 5  | 2753 |
| 3038 65145 64859 5e-84 318    |                |           |    |    |      |
| gi 33285929 gb AY223844.1     | AAGE02021555.1 | 87.71 236 | 23 | 6  | 2760 |
| 2990 29197 28963 1e-69 270    |                |           |    |    |      |
| gi 33285929 gb AY223844.1     | AAGE02021555.1 | 86.61 239 | 26 | 5  | 2758 |
| 2990 48329 48567 3e-66 259    |                |           |    |    |      |
| gi 33285929 gb AY223844.1     | AAGE02021555.1 | 89.76 127 | 11 | 2  | 2866 |
| 2990 146067 146193 9e-37 161  |                |           |    |    |      |
| gi 33285929 gb AY223844.1     | AAGE02021555.1 | 93.59 78  | 4  | 1  | 2914 |
| 2990 91516 91439 7e-23 115    |                |           |    |    |      |
| gi 33285929 gb AY223844.1     | AAGE02021555.1 | 94.44 36  | 2  | 0  | 3174 |
| 3209 182288 182253 4e-05 56.5 |                |           |    |    |      |
| gi 33285929 gb AY223844.1     | AAGE02020420.1 | 91.14 237 | 17 | 4  | 2758 |
| 2990 31132 30896 5e-84 318    |                |           |    |    |      |
| gi 33285929 gb AY223844.1     | AAGE02020420.1 | 90.59 85  | 7  | 1  | 2914 |
| 2997 37799 37715 9e-22 111    |                |           |    |    |      |
| gi 33285929 gb AY223844.1     | AAGE02019809.1 | 86.81 288 | 35 | 3  | 2754 |
| 3039 164559 164845 5e-84 318  |                |           |    |    |      |
| gi 33285929 gb AY223844.1     | AAGE02019809.1 | 85.29 238 | 29 | 6  | 2759 |
| 2990 68170 67933 1e-60 241    |                |           |    |    |      |
| gi 33285929 gb AY223844.1     | AAGE02019809.1 | 80.67 238 | 34 | 10 | 2759 |
| 2990 55148 55379 1e-40 174    |                |           |    |    |      |
| gi 33285929 gb AY223844.1     | AAGE02019054.1 | 87.02 285 | 34 | 3  | 2753 |
| 3035 14311 14028 5e-84 318    |                |           |    |    |      |
| gi 33285929 gb AY223844.1     | AAGE02018971.1 | 87.02 285 | 34 | 3  | 2753 |
| 3035 49687 49970 5e-84 318    |                |           |    |    |      |
| gi 33285929 gb AY223844.1     | AAGE02018971.1 | 85.36 239 | 30 | 5  | 2757 |
| 2990 6468 6230 3e-61 243      |                |           |    |    |      |

|                              |                |       |     |    |   |      |
|------------------------------|----------------|-------|-----|----|---|------|
| gi 33285929 gb AY223844.1    | AAGE02018971.1 | 83.33 | 240 | 34 | 5 | 2757 |
| 2990 38146 38385 2e-53 217   |                |       |     |    |   |      |
| gi 33285929 gb AY223844.1    | AAGE02018938.1 | 86.81 | 288 | 35 | 3 | 2750 |
| 3035 150883 150597 5e-84 318 |                |       |     |    |   |      |
| gi 33285929 gb AY223844.1    | AAGE02018938.1 | 85.31 | 286 | 38 | 4 | 2754 |
| 3036 66252 65968 3e-76 292   |                |       |     |    |   |      |
| gi 33285929 gb AY223844.1    | AAGE02018938.1 | 84.78 | 276 | 38 | 4 | 2755 |
| 3027 43987 43713 1e-70 274   |                |       |     |    |   |      |
| gi 33285929 gb AY223844.1    | AAGE02018938.1 | 86.92 | 237 | 24 | 7 | 2757 |
| 2986 167045 167281 3e-66 259 |                |       |     |    |   |      |
| gi 33285929 gb AY223844.1    | AAGE02018841.1 | 86.81 | 288 | 34 | 4 | 2751 |
| 3035 4746 4460 5e-84 318     |                |       |     |    |   |      |
| gi 33285929 gb AY223844.1    | AAGE02018841.1 | 86.99 | 246 | 25 | 7 | 2751 |
| 2990 62306 62550 1e-69 270   |                |       |     |    |   |      |
| gi 33285929 gb AY223844.1    | AAGE02018841.1 | 87.39 | 238 | 24 | 6 | 2758 |
| 2990 60206 60442 5e-69 268   |                |       |     |    |   |      |
| gi 33285929 gb AY223844.1    | AAGE02018751.1 | 87.02 | 285 | 33 | 4 | 2754 |
| 3035 8914 8631 5e-84 318     |                |       |     |    |   |      |
| gi 33285929 gb AY223844.1    | AAGE02018061.1 | 86.81 | 288 | 34 | 4 | 2751 |
| 3035 47557 47843 5e-84 318   |                |       |     |    |   |      |
| gi 33285929 gb AY223844.1    | AAGE02017482.1 | 86.81 | 288 | 34 | 4 | 2751 |
| 3035 56150 56436 5e-84 318   |                |       |     |    |   |      |
| gi 33285929 gb AY223844.1    | AAGE02017482.1 | 86.27 | 284 | 35 | 4 | 2755 |
| 3035 77214 77496 4e-80 305   |                |       |     |    |   |      |
| gi 33285929 gb AY223844.1    | AAGE02017482.1 | 85.29 | 238 | 29 | 6 | 2758 |
| 2990 76879 76643 1e-60 241   |                |       |     |    |   |      |
| gi 33285929 gb AY223844.1    | AAGE02017472.1 | 86.85 | 289 | 33 | 5 | 2754 |
| 3038 11051 10764 5e-84 318   |                |       |     |    |   |      |
| gi 33285929 gb AY223844.1    | AAGE02017234.1 | 86.81 | 288 | 34 | 4 | 2751 |
| 3035 26775 26489 5e-84 318   |                |       |     |    |   |      |
| gi 33285929 gb AY223844.1    | AAGE02016469.1 | 86.81 | 288 | 34 | 4 | 2754 |
| 3038 103802 104088 5e-84 318 |                |       |     |    |   |      |
| gi 33285929 gb AY223844.1    | AAGE02016469.1 | 87.23 | 282 | 31 | 5 | 2757 |
| 3035 37096 37375 2e-83 316   |                |       |     |    |   |      |
| gi 33285929 gb AY223844.1    | AAGE02016469.1 | 84.45 | 283 | 37 | 6 | 2757 |
| 3035 183817 183538 4e-70 272 |                |       |     |    |   |      |
| gi 33285929 gb AY223844.1    | AAGE02016465.1 | 86.81 | 288 | 34 | 4 | 2751 |
| 3035 20962 21248 5e-84 318   |                |       |     |    |   |      |
| gi 33285929 gb AY223844.1    | AAGE02016465.1 | 84.28 | 229 | 26 | 6 | 2763 |
| 2989 26399 26619 6e-53 215   |                |       |     |    |   |      |
| gi 33285929 gb AY223844.1    | AAGE02016307.1 | 87.46 | 279 | 32 | 3 | 2758 |
| 3034 13239 13516 5e-84 318   |                |       |     |    |   |      |
| gi 33285929 gb AY223844.1    | AAGE02016307.1 | 83.68 | 239 | 25 | 9 | 2757 |
| 2989 6415 6645 2e-52 213     |                |       |     |    |   |      |
| gi 33285929 gb AY223844.1    | AAGE02015871.1 | 86.60 | 291 | 35 | 4 | 2745 |
| 3032 14162 14451 5e-84 318   |                |       |     |    |   |      |
| gi 33285929 gb AY223844.1    | AAGE02015365.1 | 86.33 | 300 | 32 | 8 | 2740 |
| 3035 93482 93776 5e-84 318   |                |       |     |    |   |      |
| gi 33285929 gb AY223844.1    | AAGE02015259.1 | 86.05 | 301 | 36 | 6 | 2751 |
| 3049 20833 20537 5e-84 318   |                |       |     |    |   |      |
| gi 33285929 gb AY223844.1    | AAGE02015026.1 | 86.81 | 288 | 34 | 4 | 2750 |
| 3035 6455 6170 5e-84 318     |                |       |     |    |   |      |

|                              |                |           |    |    |      |
|------------------------------|----------------|-----------|----|----|------|
| gi 33285929 gb AY223844.1    | AAGE02015026.1 | 89.54 239 | 19 | 6  | 2758 |
| 2990 4872 4634 6e-78 298     |                |           |    |    |      |
| gi 33285929 gb AY223844.1    | AAGE02015026.1 | 87.30 244 | 27 | 3  | 2751 |
| 2990 16648 16891 3e-71 276   |                |           |    |    |      |
| gi 33285929 gb AY223844.1    | AAGE02014604.1 | 86.81 288 | 34 | 4  | 2754 |
| 3038 2113 1827 5e-84 318     |                |           |    |    |      |
| gi 33285929 gb AY223844.1    | AAGE02014322.1 | 86.81 288 | 34 | 4  | 2751 |
| 3035 31201 31487 5e-84 318   |                |           |    |    |      |
| gi 33285929 gb AY223844.1    | AAGE02013647.1 | 86.64 292 | 34 | 5  | 2751 |
| 3038 49752 50042 5e-84 318   |                |           |    |    |      |
| gi 33285929 gb AY223844.1    | AAGE02013647.1 | 88.02 242 | 23 | 6  | 2755 |
| 2990 160624 160383 6e-73 281 |                |           |    |    |      |
| gi 33285929 gb AY223844.1    | AAGE02013647.1 | 84.49 245 | 23 | 11 | 2758 |
| 2990 78680 78921 8e-57 228   |                |           |    |    |      |
| gi 33285929 gb AY223844.1    | AAGE02013647.1 | 84.03 238 | 33 | 4  | 2757 |
| 2990 16713 16949 1e-55 224   |                |           |    |    |      |
| gi 33285929 gb AY223844.1    | AAGE02013356.1 | 87.23 282 | 33 | 3  | 2757 |
| 3036 54790 54510 5e-84 318   |                |           |    |    |      |
| gi 33285929 gb AY223844.1    | AAGE02013356.1 | 90.99 111 | 9  | 1  | 2755 |
| 2864 102885 102775 7e-33 148 |                |           |    |    |      |
| gi 33285929 gb AY223844.1    | AAGE02013356.1 | 92.19 64  | 4  | 1  | 2928 |
| 2990 59122 59059 4e-15 89.8  |                |           |    |    |      |
| gi 33285929 gb AY223844.1    | AAGE02013286.1 | 87.23 282 | 33 | 3  | 2752 |
| 3031 15210 15490 5e-84 318   |                |           |    |    |      |
| gi 33285929 gb AY223844.1    | AAGE02013286.1 | 87.39 238 | 23 | 7  | 2760 |
| 2990 23140 22903 2e-68 267   |                |           |    |    |      |
| gi 33285929 gb AY223844.1    | AAGE02013286.1 | 87.08 240 | 21 | 10 | 2757 |
| 2990 28058 27823 2e-67 263   |                |           |    |    |      |
| gi 33285929 gb AY223844.1    | AAGE02012535.1 | 86.60 291 | 36 | 3  | 2751 |
| 3039 5698 5987 5e-84 318     |                |           |    |    |      |
| gi 33285929 gb AY223844.1    | AAGE02011992.1 | 87.23 282 | 32 | 4  | 2757 |
| 3035 26205 25925 5e-84 318   |                |           |    |    |      |
| gi 33285929 gb AY223844.1    | AAGE02011992.1 | 85.07 288 | 35 | 8  | 2752 |
| 3035 41772 42055 1e-74 287   |                |           |    |    |      |
| gi 33285929 gb AY223844.1    | AAGE02011948.1 | 87.23 282 | 33 | 3  | 2756 |
| 3035 16006 16286 5e-84 318   |                |           |    |    |      |
| gi 33285929 gb AY223844.1    | AAGE02011768.1 | 86.85 289 | 32 | 6  | 2751 |
| 3035 24329 24043 5e-84 318   |                |           |    |    |      |
| gi 33285929 gb AY223844.1    | AAGE02011768.1 | 93.33 90  | 5  | 1  | 2902 |
| 2990 2397 2308 7e-28 132     |                |           |    |    |      |
| gi 33285929 gb AY223844.1    | AAGE02011620.1 | 90.57 244 | 17 | 6  | 2753 |
| 2990 21846 21603 5e-84 318   |                |           |    |    |      |
| gi 33285929 gb AY223844.1    | AAGE02011025.1 | 86.81 288 | 34 | 4  | 2751 |
| 3035 13154 12868 5e-84 318   |                |           |    |    |      |
| gi 33285929 gb AY223844.1    | AAGE02011025.1 | 88.11 244 | 23 | 6  | 2753 |
| 2990 1118 875 5e-74 285      |                |           |    |    |      |
| gi 33285929 gb AY223844.1    | AAGE02010943.1 | 85.90 305 | 36 | 7  | 2745 |
| 3045 118438 118137 5e-84 318 |                |           |    |    |      |
| gi 33285929 gb AY223844.1    | AAGE02010943.1 | 87.55 241 | 24 | 6  | 2756 |
| 2990 145987 146227 1e-70 274 |                |           |    |    |      |
| gi 33285929 gb AY223844.1    | AAGE02010943.1 | 93.27 104 | 6  | 1  | 2759 |
| 2861 37075 37178 5e-34 152   |                |           |    |    |      |

|                              |                |       |     |    |   |      |
|------------------------------|----------------|-------|-----|----|---|------|
| gi 33285929 gb AY223844.1    | AAGE02010943.1 | 90.18 | 112 | 10 | 1 | 2880 |
| 2990 4828 4939 9e-32 145     |                |       |     |    |   |      |
| gi 33285929 gb AY223844.1    | AAGE02010943.1 | 91.67 | 96  | 6  | 2 | 2759 |
| 2852 2862 2957 7e-28 132     |                |       |     |    |   |      |
| gi 33285929 gb AY223844.1    | AAGE02010632.1 | 87.46 | 279 | 31 | 4 | 2759 |
| 3035 5644 5368 5e-84 318     |                |       |     |    |   |      |
| gi 33285929 gb AY223844.1    | AAGE02010257.1 | 87.46 | 279 | 32 | 3 | 2758 |
| 3034 30561 30838 5e-84 318   |                |       |     |    |   |      |
| gi 33285929 gb AY223844.1    | AAGE02010119.1 | 86.81 | 288 | 34 | 4 | 2751 |
| 3035 15777 15491 5e-84 318   |                |       |     |    |   |      |
| gi 33285929 gb AY223844.1    | AAGE02010042.1 | 87.28 | 283 | 31 | 5 | 2756 |
| 3035 7940 7660 5e-84 318     |                |       |     |    |   |      |
| gi 33285929 gb AY223844.1    | AAGE02009846.1 | 86.81 | 288 | 34 | 4 | 2751 |
| 3035 98390 98676 5e-84 318   |                |       |     |    |   |      |
| gi 33285929 gb AY223844.1    | AAGE02009846.1 | 85.52 | 290 | 35 | 5 | 2752 |
| 3040 112372 112089 2e-77 296 |                |       |     |    |   |      |
| gi 33285929 gb AY223844.1    | AAGE02009846.1 | 88.21 | 246 | 23 | 6 | 2751 |
| 2990 106195 106440 4e-75 289 |                |       |     |    |   |      |
| gi 33285929 gb AY223844.1    | AAGE02009846.1 | 87.40 | 246 | 25 | 6 | 2751 |
| 2990 121820 122065 8e-72 278 |                |       |     |    |   |      |
| gi 33285929 gb AY223844.1    | AAGE02009846.1 | 83.62 | 287 | 37 | 6 | 2751 |
| 3035 18630 18352 8e-67 261   |                |       |     |    |   |      |
| gi 33285929 gb AY223844.1    | AAGE02009846.1 | 86.32 | 212 | 21 | 5 | 2762 |
| 2970 26275 26069 1e-55 224   |                |       |     |    |   |      |
| gi 33285929 gb AY223844.1    | AAGE02009846.1 | 82.35 | 221 | 23 | 6 | 2761 |
| 2978 59676 59469 8e-42 178   |                |       |     |    |   |      |
| gi 33285929 gb AY223844.1    | AAGE02009846.1 | 90.55 | 127 | 10 | 2 | 2866 |
| 2990 116164 116038 2e-38 167 |                |       |     |    |   |      |
| gi 33285929 gb AY223844.1    | AAGE02009846.1 | 91.23 | 114 | 9  | 1 | 2878 |
| 2990 33860 33973 1e-34 154   |                |       |     |    |   |      |
| gi 33285929 gb AY223844.1    | AAGE02009749.1 | 86.90 | 290 | 31 | 7 | 2749 |
| 3035 59924 60209 5e-84 318   |                |       |     |    |   |      |
| gi 33285929 gb AY223844.1    | AAGE02009749.1 | 87.80 | 246 | 22 | 8 | 2759 |
| 2997 43970 44214 6e-73 281   |                |       |     |    |   |      |
| gi 33285929 gb AY223844.1    | AAGE02009749.1 | 88.19 | 127 | 13 | 2 | 2866 |
| 2990 26248 26122 2e-33 150   |                |       |     |    |   |      |
| gi 33285929 gb AY223844.1    | AAGE02009502.1 | 86.60 | 291 | 35 | 4 | 2748 |
| 3035 49512 49801 5e-84 318   |                |       |     |    |   |      |
| gi 33285929 gb AY223844.1    | AAGE02009502.1 | 87.02 | 285 | 34 | 3 | 2753 |
| 3035 73915 74198 5e-84 318   |                |       |     |    |   |      |
| gi 33285929 gb AY223844.1    | AAGE02009502.1 | 86.43 | 221 | 25 | 3 | 2758 |
| 2974 1133 1352 1e-59 237     |                |       |     |    |   |      |
| gi 33285929 gb AY223844.1    | AAGE02009326.1 | 87.06 | 286 | 31 | 6 | 2753 |
| 3035 53963 54245 5e-84 318   |                |       |     |    |   |      |
| gi 33285929 gb AY223844.1    | AAGE02009326.1 | 87.73 | 163 | 16 | 4 | 2832 |
| 2990 15166 15004 1e-44 187   |                |       |     |    |   |      |
| gi 33285929 gb AY223844.1    | AAGE02009326.1 | 93.88 | 49  | 2  | 1 | 2943 |
| 2990 49097 49049 4e-10 73.1  |                |       |     |    |   |      |
| gi 33285929 gb AY223844.1    | AAGE02008653.1 | 86.44 | 295 | 34 | 6 | 2745 |
| 3035 368468 368760 5e-84 318 |                |       |     |    |   |      |
| gi 33285929 gb AY223844.1    | AAGE02008653.1 | 88.02 | 217 | 21 | 4 | 2779 |
| 2990 329205 329421 5e-64 252 |                |       |     |    |   |      |

```

gi|33285929|gb|AY223844.1| AAGE02008653.1 86.57 216 25 3 2750
2962 117001 116787 5e-59 235
gi|33285929|gb|AY223844.1| AAGE02008457.1 86.81 288 35 3 2750
3035 292977 292691 5e-84 318
gi|33285929|gb|AY223844.1| AAGE02008457.1 88.61 237 23 4 2758
2990 303936 303700 5e-74 285
gi|33285929|gb|AY223844.1| AAGE02008457.1 88.46 234 23 4 2761
2990 4631 4864 2e-72 279
gi|33285929|gb|AY223844.1| AAGE02008457.1 87.65 243 25 5 2753
2990 154487 154245 8e-72 278
gi|33285929|gb|AY223844.1| AAGE02007267.1 86.33 300 32 9 2749
3045 60460 60753 5e-84 318
gi|33285929|gb|AY223844.1| AAGE02006862.1 86.81 288 34 4 2751
3035 63893 64179 5e-84 318
gi|33285929|gb|AY223844.1| AAGE02006862.1 84.32 287 40 5 2752
3035 143172 142888 3e-71 276
gi|33285929|gb|AY223844.1| AAGE02006862.1 86.06 251 27 8 2748
2990 142167 141917 2e-67 263
gi|33285929|gb|AY223844.1| AAGE02006782.1 87.02 285 33 4 2756
3038 117894 117612 5e-84 318
gi|33285929|gb|AY223844.1| AAGE02006782.1 86.83 243 27 5 2753
2990 137867 137625 2e-68 267
gi|33285929|gb|AY223844.1| AAGE02006782.1 86.72 241 25 6 2755
2990 114773 114535 8e-67 261
gi|33285929|gb|AY223844.1| AAGE02006782.1 81.30 246 18 17 2750
2990 207720 207942 1e-40 174
gi|33285929|gb|AY223844.1| AAGE02006782.1 76.47 238 29 12 2758
2990 23339 23554 1e-19 104
gi|33285929|gb|AY223844.1| AAGE02006317.1 87.06 286 32 5 2752
3035 7867 7585 5e-84 318
gi|33285929|gb|AY223844.1| AAGE02006271.1 87.06 286 31 6 2752
3035 88702 88983 5e-84 318
gi|33285929|gb|AY223844.1| AAGE02006271.1 87.03 239 25 6 2758
2990 32712 32474 6e-68 265
gi|33285929|gb|AY223844.1| AAGE02006271.1 85.60 250 29 7 2748
2990 50468 50717 4e-65 255
gi|33285929|gb|AY223844.1| AAGE02006271.1 84.05 232 18 10 2751
2963 151024 151255 4e-50 206

```

# BLASTN 2.2.28+

# Query: gi|33347862|gb|AF411835.1| Aedes albopictus cell fusing agent virus polyprotein-like protein and agCP8252-like protein genes, complete cds

# Database: /Volumes/Seagate\_Exp\_2/aedes\_aegypti/blast\_dbps/AaLVPC

# Fields: query id, subject id, % identity, alignment length, mismatches, gap opens, q. start, q. end, s. start, s. end, evalue, bit score

# 124 hits found

```

gi|33347862|gb|AF411835.1| AAGE02008627.1 89.09 55 4 2 938
991 16550 16603 6e-08 67.6
gi|33347862|gb|AF411835.1| AAGE02008627.1 90.20 51 3 2 994
1043 16605 16556 2e-07 65.8

```



|                           |                |          |    |   |     |
|---------------------------|----------------|----------|----|---|-----|
| gi 33347862 gb AF411835.1 | AAGE02006279.1 | 87.72 57 | 5  | 2 | 996 |
| 1051 115345 115290        | 2e-07 65.8     |          |    |   |     |
| gi 33347862 gb AF411835.1 | AAGE02006279.1 | 89.80 49 | 5  | 0 | 945 |
| 993 115299 115347         | 8e-07 63.9     |          |    |   |     |
| gi 33347862 gb AF411835.1 | AAGE02006279.1 | 89.80 49 | 5  | 0 | 994 |
| 1042 116711 116663        | 8e-07 63.9     |          |    |   |     |
| gi 33347862 gb AF411835.1 | AAGE02006279.1 | 89.36 47 | 5  | 0 | 945 |
| 991 116663 116709         | 1e-05 60.2     |          |    |   |     |
| gi 33347862 gb AF411835.1 | AAGE02018814.1 | 89.80 49 | 5  | 0 | 994 |
| 1042 3563 3515            | 8e-07 63.9     |          |    |   |     |
| gi 33347862 gb AF411835.1 | AAGE02018814.1 | 87.04 54 | 7  | 0 | 938 |
| 991 3508 3561             | 3e-06 62.1     |          |    |   |     |
| gi 33347862 gb AF411835.1 | AAGE02000595.1 | 89.80 49 | 5  | 0 | 994 |
| 1042 302248 302296        | 8e-07 63.9     |          |    |   |     |
| gi 33347862 gb AF411835.1 | AAGE02000595.1 | 87.04 54 | 7  | 0 | 938 |
| 991 302303 302250         | 3e-06 62.1     |          |    |   |     |
| gi 33347862 gb AF411835.1 | AAGE02022205.1 | 87.04 54 | 7  | 0 | 938 |
| 991 6167 6220             | 3e-06 62.1     |          |    |   |     |
| gi 33347862 gb AF411835.1 | AAGE02022205.1 | 89.36 47 | 5  | 0 | 996 |
| 1042 6220 6174            | 1e-05 60.2     |          |    |   |     |
| gi 33347862 gb AF411835.1 | AAGE02020444.1 | 100.00   | 33 | 0 | 0   |
| 991 1023 39582 39614      | 3e-06 62.1     |          |    |   |     |
| gi 33347862 gb AF411835.1 | AAGE02020444.1 | 100.00   | 28 | 0 | 0   |
| 964 991 39614 39587       | 0.002 52.8     |          |    |   |     |
| gi 33347862 gb AF411835.1 | AAGE02012839.1 | 87.04 54 | 7  | 0 | 938 |
| 991 15436 15383           | 3e-06 62.1     |          |    |   |     |
| gi 33347862 gb AF411835.1 | AAGE02012839.1 | 87.50 48 | 6  | 0 | 996 |
| 1043 15383 15430          | 1e-04 56.5     |          |    |   |     |
| gi 33347862 gb AF411835.1 | AAGE02011514.1 | 100.00   | 33 | 0 | 0   |
| 991 1023 9308 9276        | 3e-06 62.1     |          |    |   |     |
| gi 33347862 gb AF411835.1 | AAGE02011514.1 | 100.00   | 28 | 0 | 0   |
| 964 991 9276 9303         | 0.002 52.8     |          |    |   |     |
| gi 33347862 gb AF411835.1 | AAGE02015788.1 | 100.00   | 32 | 0 | 0   |
| 994 1025 1066 1035        | 1e-05 60.2     |          |    |   |     |
| gi 33347862 gb AF411835.1 | AAGE02015788.1 | 100.00   | 30 | 0 | 0   |
| 962 991 1035 1064         | 1e-04 56.5     |          |    |   |     |
| gi 33347862 gb AF411835.1 | AAGE02003132.1 | 88.00 50 | 6  | 0 | 994 |
| 1043 122919 122968        | 1e-05 60.2     |          |    |   |     |
| gi 33347862 gb AF411835.1 | AAGE02003132.1 | 86.54 52 | 7  | 0 | 940 |
| 991 122972 122921         | 4e-05 58.4     |          |    |   |     |
| gi 33347862 gb AF411835.1 | AAGE02029451.1 | 87.76 49 | 6  | 0 | 994 |
| 1042 10108 10060          | 4e-05 58.4     |          |    |   |     |
| gi 33347862 gb AF411835.1 | AAGE02029451.1 | 85.19 54 | 8  | 0 | 938 |
| 991 10053 10106           | 1e-04 56.5     |          |    |   |     |
| gi 33347862 gb AF411835.1 | AAGE02028760.1 | 87.76 49 | 6  | 0 | 994 |
| 1042 8654 8702            | 4e-05 58.4     |          |    |   |     |
| gi 33347862 gb AF411835.1 | AAGE02028760.1 | 85.19 54 | 8  | 0 | 938 |
| 991 8709 8656             | 1e-04 56.5     |          |    |   |     |
| gi 33347862 gb AF411835.1 | AAGE02027875.1 | 87.76 49 | 6  | 0 | 994 |
| 1042 99344 99392          | 4e-05 58.4     |          |    |   |     |
| gi 33347862 gb AF411835.1 | AAGE02027875.1 | 85.19 54 | 8  | 0 | 938 |
| 991 99399 99346           | 1e-04 56.5     |          |    |   |     |

|                                  |                |          |    |   |     |
|----------------------------------|----------------|----------|----|---|-----|
| gi 33347862 gb AF411835.1        | AAGE02022529.1 | 87.76 49 | 6  | 0 | 994 |
| 1042 26442 26394 4e-05 58.4      |                |          |    |   |     |
| gi 33347862 gb AF411835.1        | AAGE02022529.1 | 85.19 54 | 8  | 0 | 938 |
| 991 26387 26440 1e-04 56.5       |                |          |    |   |     |
| gi 33347862 gb AF411835.1        | AAGE02022429.1 | 87.76 49 | 6  | 0 | 994 |
| 1042 26326 26278 4e-05 58.4      |                |          |    |   |     |
| gi 33347862 gb AF411835.1        | AAGE02022429.1 | 85.19 54 | 8  | 0 | 938 |
| 991 26271 26324 1e-04 56.5       |                |          |    |   |     |
| gi 33347862 gb AF411835.1        | AAGE02021418.1 | 87.76 49 | 6  | 0 | 994 |
| 1042 105879 105927 4e-05 58.4    |                |          |    |   |     |
| gi 33347862 gb AF411835.1        | AAGE02021418.1 | 85.19 54 | 8  | 0 | 938 |
| 991 105934 105881 1e-04 56.5     |                |          |    |   |     |
| gi 33347862 gb AF411835.1        | AAGE02019434.1 | 87.76 49 | 6  | 0 | 994 |
| 1042 17662 17710 4e-05 58.4      |                |          |    |   |     |
| gi 33347862 gb AF411835.1        | AAGE02019434.1 | 85.19 54 | 8  | 0 | 938 |
| 991 17717 17664 1e-04 56.5       |                |          |    |   |     |
| gi 33347862 gb AF411835.1        | AAGE02016549.1 | 87.76 49 | 6  | 0 | 994 |
| 1042 5830 5878 4e-05 58.4        |                |          |    |   |     |
| gi 33347862 gb AF411835.1        | AAGE02016549.1 | 85.19 54 | 8  | 0 | 938 |
| 991 5885 5832 1e-04 56.5         |                |          |    |   |     |
| gi 33347862 gb AF411835.1        | AAGE02014417.1 | 87.76 49 | 6  | 0 | 994 |
| 1042 151638 151590 4e-05 58.4    |                |          |    |   |     |
| gi 33347862 gb AF411835.1        | AAGE02014417.1 | 85.19 54 | 8  | 0 | 938 |
| 991 151583 151636 1e-04 56.5     |                |          |    |   |     |
| gi 33347862 gb AF411835.1        | AAGE02014157.1 | 87.76 49 | 6  | 0 | 994 |
| 1042 2503 2551 4e-05 58.4        |                |          |    |   |     |
| gi 33347862 gb AF411835.1        | AAGE02014157.1 | 85.19 54 | 8  | 0 | 938 |
| 991 2558 2505 1e-04 56.5         |                |          |    |   |     |
| gi 33347862 gb AF411835.1        | AAGE02013910.1 | 87.76 49 | 6  | 0 | 994 |
| 1042 325961 326009 4e-05 58.4    |                |          |    |   |     |
| gi 33347862 gb AF411835.1        | AAGE02013910.1 | 85.19 54 | 8  | 0 | 938 |
| 991 326016 325963 1e-04 56.5     |                |          |    |   |     |
| gi 33347862 gb AF411835.1        | AAGE02013667.1 | 100.00   | 31 | 0 | 0   |
| 1015 1045 14275 14245 4e-05 58.4 |                |          |    |   |     |
| gi 33347862 gb AF411835.1        | AAGE02013667.1 | 100.00   | 30 | 0 | 0   |
| 943 972 14246 14275 1e-04 56.5   |                |          |    |   |     |
| gi 33347862 gb AF411835.1        | AAGE02012738.1 | 87.76 49 | 6  | 0 | 994 |
| 1042 29240 29192 4e-05 58.4      |                |          |    |   |     |
| gi 33347862 gb AF411835.1        | AAGE02012738.1 | 85.19 54 | 8  | 0 | 938 |
| 991 29185 29238 1e-04 56.5       |                |          |    |   |     |
| gi 33347862 gb AF411835.1        | AAGE02011126.1 | 87.76 49 | 6  | 0 | 994 |
| 1042 22140 22092 4e-05 58.4      |                |          |    |   |     |
| gi 33347862 gb AF411835.1        | AAGE02011126.1 | 87.23 47 | 6  | 0 | 945 |
| 991 22092 22138 5e-04 54.7       |                |          |    |   |     |
| gi 33347862 gb AF411835.1        | AAGE02010558.1 | 88.00 50 | 4  | 2 | 994 |
| 1042 13991 13943 4e-05 58.4      |                |          |    |   |     |
| gi 33347862 gb AF411835.1        | AAGE02010558.1 | 87.50 48 | 4  | 2 | 945 |
| 991 13943 13989 5e-04 54.7       |                |          |    |   |     |
| gi 33347862 gb AF411835.1        | AAGE02010151.1 | 87.76 49 | 6  | 0 | 994 |
| 1042 113592 113544 4e-05 58.4    |                |          |    |   |     |
| gi 33347862 gb AF411835.1        | AAGE02010151.1 | 85.19 54 | 8  | 0 | 938 |
| 991 113537 113590 1e-04 56.5     |                |          |    |   |     |

|                                  |                |          |    |   |     |
|----------------------------------|----------------|----------|----|---|-----|
| gi 33347862 gb AF411835.1        | AAGE02010006.1 | 92.50 40 | 3  | 0 | 994 |
| 1033 35172 35133 4e-05 58.4      |                |          |    |   |     |
| gi 33347862 gb AF411835.1        | AAGE02010006.1 | 92.11 38 | 3  | 0 | 954 |
| 991 35133 35170 5e-04 54.7       |                |          |    |   |     |
| gi 33347862 gb AF411835.1        | AAGE02008934.1 | 87.76 49 | 6  | 0 | 994 |
| 1042 12187 12139 4e-05 58.4      |                |          |    |   |     |
| gi 33347862 gb AF411835.1        | AAGE02008934.1 | 85.19 54 | 8  | 0 | 938 |
| 991 12132 12185 1e-04 56.5       |                |          |    |   |     |
| gi 33347862 gb AF411835.1        | AAGE02008928.1 | 87.76 49 | 6  | 0 | 994 |
| 1042 22094 22046 4e-05 58.4      |                |          |    |   |     |
| gi 33347862 gb AF411835.1        | AAGE02008928.1 | 87.76 49 | 6  | 0 | 994 |
| 1042 181581 181533 4e-05 58.4    |                |          |    |   |     |
| gi 33347862 gb AF411835.1        | AAGE02008928.1 | 85.19 54 | 8  | 0 | 938 |
| 991 22039 22092 1e-04 56.5       |                |          |    |   |     |
| gi 33347862 gb AF411835.1        | AAGE02008928.1 | 85.19 54 | 8  | 0 | 938 |
| 991 181526 181579 1e-04 56.5     |                |          |    |   |     |
| gi 33347862 gb AF411835.1        | AAGE02008103.1 | 100.00   | 31 | 0 | 0   |
| 1015 1045 16824 16854 4e-05 58.4 |                |          |    |   |     |
| gi 33347862 gb AF411835.1        | AAGE02008103.1 | 100.00   | 30 | 0 | 0   |
| 943 972 16853 16824 1e-04 56.5   |                |          |    |   |     |
| gi 33347862 gb AF411835.1        | AAGE02007493.1 | 87.76 49 | 6  | 0 | 994 |
| 1042 591 543 4e-05 58.4          |                |          |    |   |     |
| gi 33347862 gb AF411835.1        | AAGE02007493.1 | 85.19 54 | 8  | 0 | 938 |
| 991 536 589 1e-04 56.5           |                |          |    |   |     |
| gi 33347862 gb AF411835.1        | AAGE02007084.1 | 87.76 49 | 6  | 0 | 994 |
| 1042 5223 5175 4e-05 58.4        |                |          |    |   |     |
| gi 33347862 gb AF411835.1        | AAGE02007084.1 | 85.19 54 | 8  | 0 | 938 |
| 991 5168 5221 1e-04 56.5         |                |          |    |   |     |
| gi 33347862 gb AF411835.1        | AAGE02006473.1 | 87.76 49 | 6  | 0 | 994 |
| 1042 32349 32397 4e-05 58.4      |                |          |    |   |     |
| gi 33347862 gb AF411835.1        | AAGE02006473.1 | 85.19 54 | 8  | 0 | 938 |
| 991 32404 32351 1e-04 56.5       |                |          |    |   |     |
| gi 33347862 gb AF411835.1        | AAGE02006311.1 | 87.76 49 | 6  | 0 | 994 |
| 1042 8238 8190 4e-05 58.4        |                |          |    |   |     |
| gi 33347862 gb AF411835.1        | AAGE02006311.1 | 85.19 54 | 8  | 0 | 938 |
| 991 8183 8236 1e-04 56.5         |                |          |    |   |     |
| gi 33347862 gb AF411835.1        | AAGE02004552.1 | 97.06 34 | 1  | 0 | 990 |
| 1023 42486 42453 4e-05 58.4      |                |          |    |   |     |
| gi 33347862 gb AF411835.1        | AAGE02004552.1 | 100.00   | 28 | 0 | 0   |
| 964 991 42453 42480 0.002 52.8   |                |          |    |   |     |
| gi 33347862 gb AF411835.1        | AAGE02003018.1 | 100.00   | 31 | 0 | 0   |
| 1015 1045 394 364 4e-05 58.4     |                |          |    |   |     |
| gi 33347862 gb AF411835.1        | AAGE02003018.1 | 100.00   | 30 | 0 | 0   |
| 943 972 365 394 1e-04 56.5       |                |          |    |   |     |
| gi 33347862 gb AF411835.1        | AAGE02002823.1 | 87.76 49 | 6  | 0 | 994 |
| 1042 30019 29971 4e-05 58.4      |                |          |    |   |     |
| gi 33347862 gb AF411835.1        | AAGE02002823.1 | 85.19 54 | 8  | 0 | 938 |
| 991 29964 30017 1e-04 56.5       |                |          |    |   |     |
| gi 33347862 gb AF411835.1        | AAGE02002286.1 | 87.76 49 | 6  | 0 | 994 |
| 1042 57644 57692 4e-05 58.4      |                |          |    |   |     |
| gi 33347862 gb AF411835.1        | AAGE02002286.1 | 85.19 54 | 8  | 0 | 938 |
| 991 57699 57646 1e-04 56.5       |                |          |    |   |     |

|                           |                |          |    |   |     |
|---------------------------|----------------|----------|----|---|-----|
| gi 33347862 gb AF411835.1 | AAGE02002117.1 | 87.76 49 | 6  | 0 | 994 |
| 1042 136390 136438        | 4e-05 58.4     |          |    |   |     |
| gi 33347862 gb AF411835.1 | AAGE02002117.1 | 85.19 54 | 8  | 0 | 938 |
| 991 136445 136392         | 1e-04 56.5     |          |    |   |     |
| gi 33347862 gb AF411835.1 | AAGE02001492.1 | 87.76 49 | 6  | 0 | 994 |
| 1042 21885 21933          | 4e-05 58.4     |          |    |   |     |
| gi 33347862 gb AF411835.1 | AAGE02001492.1 | 87.23 47 | 6  | 0 | 945 |
| 991 21933 21887           | 5e-04 54.7     |          |    |   |     |
| gi 33347862 gb AF411835.1 | AAGE02028990.1 | 96.97 33 | 1  | 0 | 994 |
| 1026 1038 1070            | 1e-04 56.5     |          |    |   |     |
| gi 33347862 gb AF411835.1 | AAGE02028990.1 | 100.00   | 28 | 0 | 0   |
| 961 988 1070 1043         | 0.002 52.8     |          |    |   |     |
| gi 33347862 gb AF411835.1 | AAGE02025701.1 | 100.00   | 30 | 0 | 0   |
| 994 1023 1024 995         | 1e-04 56.5     |          |    |   |     |
| gi 33347862 gb AF411835.1 | AAGE02025701.1 | 100.00   | 28 | 0 | 0   |
| 964 991 995 1022          | 0.002 52.8     |          |    |   |     |
| gi 33347862 gb AF411835.1 | AAGE02019662.1 | 100.00   | 30 | 0 | 0   |
| 994 1023 34565 34594      | 1e-04 56.5     |          |    |   |     |
| gi 33347862 gb AF411835.1 | AAGE02019662.1 | 100.00   | 28 | 0 | 0   |
| 964 991 34594 34567       | 0.002 52.8     |          |    |   |     |
| gi 33347862 gb AF411835.1 | AAGE02019595.1 | 100.00   | 30 | 0 | 0   |
| 994 1023 29224 29195      | 1e-04 56.5     |          |    |   |     |
| gi 33347862 gb AF411835.1 | AAGE02019595.1 | 100.00   | 28 | 0 | 0   |
| 964 991 29195 29222       | 0.002 52.8     |          |    |   |     |
| gi 33347862 gb AF411835.1 | AAGE02017893.1 | 100.00   | 30 | 0 | 0   |
| 994 1023 57772 57743      | 1e-04 56.5     |          |    |   |     |
| gi 33347862 gb AF411835.1 | AAGE02017893.1 | 100.00   | 28 | 0 | 0   |
| 964 991 57743 57770       | 0.002 52.8     |          |    |   |     |
| gi 33347862 gb AF411835.1 | AAGE02017543.1 | 100.00   | 30 | 0 | 0   |
| 994 1023 62698 62669      | 1e-04 56.5     |          |    |   |     |
| gi 33347862 gb AF411835.1 | AAGE02017543.1 | 100.00   | 28 | 0 | 0   |
| 964 991 62669 62696       | 0.002 52.8     |          |    |   |     |
| gi 33347862 gb AF411835.1 | AAGE02014027.1 | 100.00   | 30 | 0 | 0   |
| 994 1023 47947 47918      | 1e-04 56.5     |          |    |   |     |
| gi 33347862 gb AF411835.1 | AAGE02014027.1 | 100.00   | 28 | 0 | 0   |
| 964 991 47918 47945       | 0.002 52.8     |          |    |   |     |
| gi 33347862 gb AF411835.1 | AAGE02012857.1 | 100.00   | 30 | 0 | 0   |
| 994 1023 62290 62261      | 1e-04 56.5     |          |    |   |     |
| gi 33347862 gb AF411835.1 | AAGE02012857.1 | 100.00   | 28 | 0 | 0   |
| 964 991 62261 62288       | 0.002 52.8     |          |    |   |     |
| gi 33347862 gb AF411835.1 | AAGE02010884.1 | 87.76 49 | 4  | 2 | 995 |
| 1042 39177 39130          | 1e-04 56.5     |          |    |   |     |
| gi 33347862 gb AF411835.1 | AAGE02010884.1 | 87.50 48 | 4  | 2 | 945 |
| 991 39130 39176           | 5e-04 54.7     |          |    |   |     |
| gi 33347862 gb AF411835.1 | AAGE02009415.1 | 100.00   | 30 | 0 | 0   |
| 994 1023 86077 86048      | 1e-04 56.5     |          |    |   |     |
| gi 33347862 gb AF411835.1 | AAGE02009415.1 | 100.00   | 28 | 0 | 0   |
| 964 991 86048 86075       | 0.002 52.8     |          |    |   |     |
| gi 33347862 gb AF411835.1 | AAGE02008717.1 | 100.00   | 30 | 0 | 0   |
| 994 1023 12441 12470      | 1e-04 56.5     |          |    |   |     |
| gi 33347862 gb AF411835.1 | AAGE02008717.1 | 100.00   | 28 | 0 | 0   |
| 964 991 12470 12443       | 0.002 52.8     |          |    |   |     |

```

gi|33347862|gb|AF411835.1| AAGE02008561.1 100.00 30 0 0
994 1023 40272 40243 1e-04 56.5
gi|33347862|gb|AF411835.1| AAGE02008561.1 100.00 28 0 0
964 991 40243 40270 0.002 52.8
gi|33347862|gb|AF411835.1| AAGE02008375.1 100.00 30 0 0
994 1023 55222 55251 1e-04 56.5
gi|33347862|gb|AF411835.1| AAGE02008375.1 100.00 28 0 0
964 991 55251 55224 0.002 52.8
gi|33347862|gb|AF411835.1| AAGE02007628.1 96.97 33 1 0 991
1023 103338 103306 1e-04 56.5
gi|33347862|gb|AF411835.1| AAGE02006790.1 100.00 30 0 0
994 1023 83985 84014 1e-04 56.5
gi|33347862|gb|AF411835.1| AAGE02006790.1 100.00 28 0 0
964 991 84014 83987 0.002 52.8
gi|33347862|gb|AF411835.1| AAGE02006327.1 100.00 30 0 0
994 1023 177464 177435 1e-04 56.5
gi|33347862|gb|AF411835.1| AAGE02006327.1 100.00 28 0 0
964 991 177435 177462 0.002 52.8
gi|33347862|gb|AF411835.1| AAGE02002737.1 100.00 30 0 0
994 1023 194385 194356 1e-04 56.5
gi|33347862|gb|AF411835.1| AAGE02002737.1 100.00 28 0 0
964 991 194356 194383 0.002 52.8
gi|33347862|gb|AF411835.1| AAGE02002505.1 100.00 30 0 0
994 1023 50412 50441 1e-04 56.5
gi|33347862|gb|AF411835.1| AAGE02002505.1 100.00 28 0 0
964 991 50441 50414 0.002 52.8
gi|33347862|gb|AF411835.1| AAGE02001641.1 100.00 30 0 0
994 1023 30033 30004 1e-04 56.5
gi|33347862|gb|AF411835.1| AAGE02001641.1 100.00 28 0 0
964 991 30004 30031 0.002 52.8
gi|33347862|gb|AF411835.1| AAGE02001105.1 100.00 30 0 0
994 1023 139921 139892 1e-04 56.5
gi|33347862|gb|AF411835.1| AAGE02001105.1 100.00 28 0 0
964 991 139892 139919 0.002 52.8
gi|33347862|gb|AF411835.1| AAGE02007174.1 100.00 28 0 0
994 1021 16555 16582 0.002 52.8

```

# BLASTN 2.2.28+

```

# Query: gi|37993680|gb|AY347953.1| Aedes aegypti A20 sequence
containing region similar to NS5 gene of Kamiti River virus
# Database: /Volumes/Seagate_Exp_2/aedes_aegypti/blast_dbps/AaLVPC
# Fields: query id, subject id, % identity, alignment length,
mismatches, gap opens, q. start, q. end, s. start, s. end, evalue, bit
score

```

# 58 hits found

```

gi|37993680|gb|AY347953.1| AAGE02010562.1 98.09 1308 25 0 546
1853 52240 53547 0.0 2278
gi|37993680|gb|AY347953.1| AAGE02010562.1 92.52 775 22 15 2237
3001 119579 120327 0.0 1077
gi|37993680|gb|AY347953.1| AAGE02010562.1 97.50 360 7 2 45
402 92921 93280 5e-173 614
gi|37993680|gb|AY347953.1| AAGE02010562.1 88.40 293 6 8 405
684 43481 43758 7e-87 327

```

|    |                              |                |           |    |   |      |
|----|------------------------------|----------------|-----------|----|---|------|
| gi | 37993680 gb AY347953.1       | AAGE02010562.1 | 96.88 160 | 4  | 1 | 1850 |
|    | 2008 84484 84643 2e-68 267   |                |           |    |   |      |
| gi | 37993680 gb AY347953.1       | AAGE02034046.1 | 96.09 690 | 17 | 4 | 2322 |
|    | 3001 6904 6215 0.0 1116      |                |           |    |   |      |
| gi | 37993680 gb AY347953.1       | AAGE02016465.1 | 95.95 692 | 18 | 4 | 2320 |
|    | 3001 6380 5689 0.0 1114      |                |           |    |   |      |
| gi | 37993680 gb AY347953.1       | AAGE02018358.1 | 95.95 691 | 18 | 4 | 2321 |
|    | 3001 139145 139835 0.0 1112  |                |           |    |   |      |
| gi | 37993680 gb AY347953.1       | AAGE02023489.1 | 95.20 709 | 19 | 9 | 2304 |
|    | 3001 29200 28496 0.0 1107    |                |           |    |   |      |
| gi | 37993680 gb AY347953.1       | AAGE02000179.1 | 95.93 688 | 18 | 4 | 2324 |
|    | 3001 119420 118733 0.0 1107  |                |           |    |   |      |
| gi | 37993680 gb AY347953.1       | AAGE02021947.1 | 95.67 693 | 20 | 4 | 2319 |
|    | 3001 35161 34469 0.0 1105    |                |           |    |   |      |
| gi | 37993680 gb AY347953.1       | AAGE02013836.1 | 95.67 693 | 19 | 5 | 2320 |
|    | 3001 8440 7748 0.0 1103      |                |           |    |   |      |
| gi | 37993680 gb AY347953.1       | AAGE02008334.1 | 95.53 694 | 20 | 5 | 2319 |
|    | 3001 13494 14187 0.0 1099    |                |           |    |   |      |
| gi | 37993680 gb AY347953.1       | AAGE02015419.1 | 95.65 690 | 16 | 5 | 2322 |
|    | 3001 2071 2756 0.0 1096      |                |           |    |   |      |
| gi | 37993680 gb AY347953.1       | AAGE02014545.1 | 95.24 694 | 22 | 5 | 2319 |
|    | 3001 63831 63138 0.0 1088    |                |           |    |   |      |
| gi | 37993680 gb AY347953.1       | AAGE02012735.1 | 95.24 694 | 22 | 5 | 2319 |
|    | 3001 123851 123158 0.0 1088  |                |           |    |   |      |
| gi | 37993680 gb AY347953.1       | AAGE02005550.1 | 95.36 690 | 22 | 4 | 2322 |
|    | 3001 26116 26805 0.0 1088    |                |           |    |   |      |
| gi | 37993680 gb AY347953.1       | AAGE02028342.1 | 95.21 689 | 19 | 8 | 2323 |
|    | 3001 9070 8386 0.0 1077      |                |           |    |   |      |
| gi | 37993680 gb AY347953.1       | AAGE02021302.1 | 94.93 690 | 24 | 5 | 2322 |
|    | 3001 99474 100162 0.0 1070   |                |           |    |   |      |
| gi | 37993680 gb AY347953.1       | AAGE02000493.1 | 94.90 686 | 26 | 3 | 2325 |
|    | 3001 23059 23744 0.0 1064    |                |           |    |   |      |
| gi | 37993680 gb AY347953.1       | AAGE02014021.1 | 95.39 673 | 20 | 5 | 2339 |
|    | 3001 41574 40903 0.0 1061    |                |           |    |   |      |
| gi | 37993680 gb AY347953.1       | AAGE02005223.1 | 97.77 359 | 7  | 1 | 45   |
|    | 402 27469 27111 4e-174 617   |                |           |    |   |      |
| gi | 37993680 gb AY347953.1       | AAGE02004340.1 | 96.66 359 | 11 | 1 | 45   |
|    | 402 108335 107977 2e-167 595 |                |           |    |   |      |
| gi | 37993680 gb AY347953.1       | AAGE02004340.1 | 96.66 359 | 11 | 1 | 45   |
|    | 402 115527 115169 2e-167 595 |                |           |    |   |      |
| gi | 37993680 gb AY347953.1       | AAGE02014811.1 | 96.38 359 | 11 | 2 | 45   |
|    | 402 17083 16726 8e-166 590   |                |           |    |   |      |
| gi | 37993680 gb AY347953.1       | AAGE02011104.1 | 96.36 357 | 12 | 1 | 45   |
|    | 400 23620 23264 1e-164 586   |                |           |    |   |      |
| gi | 37993680 gb AY347953.1       | AAGE02013358.1 | 96.60 353 | 11 | 1 | 51   |
|    | 402 301873 302225 4e-164 584 |                |           |    |   |      |
| gi | 37993680 gb AY347953.1       | AAGE02008849.1 | 95.60 364 | 14 | 2 | 45   |
|    | 406 42717 43080 1e-163 582   |                |           |    |   |      |
| gi | 37993680 gb AY347953.1       | AAGE02021034.1 | 96.08 357 | 13 | 1 | 45   |
|    | 400 123368 123724 5e-163 580 |                |           |    |   |      |
| gi | 37993680 gb AY347953.1       | AAGE02021034.1 | 96.03 302 | 11 | 1 | 100  |
|    | 400 130251 130552 9e-136 490 |                |           |    |   |      |

|                           |                |           |    |   |      |
|---------------------------|----------------|-----------|----|---|------|
| gi 37993680 gb AY347953.1 | AAGE02021034.1 | 97.87 141 | 2  | 1 | 45   |
| 184 130112 130252         | 3e-61 243      |           |    |   |      |
| gi 37993680 gb AY347953.1 | AAGE02023128.1 | 95.82 359 | 14 | 1 | 45   |
| 402 9701 9343             | 2e-162 579     |           |    |   |      |
| gi 37993680 gb AY347953.1 | AAGE02001589.1 | 95.54 359 | 15 | 1 | 45   |
| 402 86892 87250           | 8e-161 573     |           |    |   |      |
| gi 37993680 gb AY347953.1 | AAGE02008417.1 | 97.06 340 | 9  | 1 | 2663 |
| 3001 142619 142280        | 3e-160 571     |           |    |   |      |
| gi 37993680 gb AY347953.1 | AAGE02008417.1 | 95.95 296 | 9  | 1 | 2322 |
| 2614 142914 142619        | 7e-132 477     |           |    |   |      |
| gi 37993680 gb AY347953.1 | AAGE02014111.1 | 95.26 359 | 13 | 3 | 45   |
| 402 43544 43189           | 1e-158 566     |           |    |   |      |
| gi 37993680 gb AY347953.1 | AAGE02016985.1 | 96.00 325 | 12 | 1 | 45   |
| 368 25383 25707           | 7e-147 527     |           |    |   |      |
| gi 37993680 gb AY347953.1 | AAGE02008697.1 | 97.72 307 | 6  | 1 | 97   |
| 402 9131 9437             | 7e-147 527     |           |    |   |      |
| gi 37993680 gb AY347953.1 | AAGE02002119.1 | 96.10 308 | 12 | 0 | 2014 |
| 2321 159308 159001        | 1e-139 503     |           |    |   |      |
| gi 37993680 gb AY347953.1 | AAGE02026032.1 | 96.10 308 | 11 | 1 | 2014 |
| 2321 32975 33281          | 4e-139 501     |           |    |   |      |
| gi 37993680 gb AY347953.1 | AAGE02004431.1 | 96.10 308 | 11 | 1 | 2014 |
| 2321 7735 8041            | 4e-139 501     |           |    |   |      |
| gi 37993680 gb AY347953.1 | AAGE02001418.1 | 96.10 308 | 11 | 1 | 2014 |
| 2321 12771 12465          | 4e-139 501     |           |    |   |      |
| gi 37993680 gb AY347953.1 | AAGE02022025.1 | 96.08 306 | 11 | 1 | 2014 |
| 2319 258815 259119        | 5e-138 497     |           |    |   |      |
| gi 37993680 gb AY347953.1 | AAGE02011036.1 | 95.79 309 | 11 | 2 | 2014 |
| 2321 54581 54888          | 5e-138 497     |           |    |   |      |
| gi 37993680 gb AY347953.1 | AAGE02024040.1 | 95.78 308 | 12 | 1 | 2014 |
| 2321 9932 9626            | 2e-137 496     |           |    |   |      |
| gi 37993680 gb AY347953.1 | AAGE02019149.1 | 95.78 308 | 12 | 1 | 2014 |
| 2321 1695 2001            | 2e-137 496     |           |    |   |      |
| gi 37993680 gb AY347953.1 | AAGE02013193.1 | 95.78 308 | 12 | 1 | 2014 |
| 2321 11061 10755          | 2e-137 496     |           |    |   |      |
| gi 37993680 gb AY347953.1 | AAGE02007461.1 | 95.78 308 | 11 | 1 | 2014 |
| 2321 17240 16935          | 2e-137 496     |           |    |   |      |
| gi 37993680 gb AY347953.1 | AAGE02012189.1 | 95.13 308 | 14 | 1 | 2014 |
| 2321 144125 143819        | 4e-134 484     |           |    |   |      |
| gi 37993680 gb AY347953.1 | AAGE02005298.1 | 93.83 308 | 18 | 1 | 2014 |
| 2321 34220 33914          | 2e-127 462     |           |    |   |      |
| gi 37993680 gb AY347953.1 | AAGE02030968.1 | 93.51 308 | 19 | 1 | 2014 |
| 2321 20232 19926          | 9e-126 457     |           |    |   |      |
| gi 37993680 gb AY347953.1 | AAGE02006957.1 | 93.18 308 | 20 | 1 | 2014 |
| 2321 69281 69587          | 4e-124 451     |           |    |   |      |
| gi 37993680 gb AY347953.1 | AAGE02021103.1 | 96.08 255 | 10 | 0 | 2324 |
| 2578 101198 100944        | 1e-113 416     |           |    |   |      |
| gi 37993680 gb AY347953.1 | AAGE02003861.1 | 90.60 319 | 18 | 6 | 2014 |
| 2321 20063 20380          | 2e-112 412     |           |    |   |      |
| gi 37993680 gb AY347953.1 | AAGE02013497.1 | 96.23 212 | 8  | 0 | 2790 |
| 3001 24712 24501          | 6e-93 348      |           |    |   |      |
| gi 37993680 gb AY347953.1 | AAGE02001290.1 | 94.06 202 | 12 | 0 | 2120 |
| 2321 197490 197691        | 9e-81 307      |           |    |   |      |

```

gi|37993680|gb|AY347953.1| AAGE02009848.1  94.71 189  10  0  2133
    2321 924  1112 7e-77 294
gi|37993680|gb|AY347953.1| AAGE02009848.1  96.09 128  3  2  2014
    2140 662  788 1e-50 207
# BLASTN 2.2.28+
# Query: gi|335355336|gb|JF707856.1| Flavivirus AV-2011/Spain strain
HU973_04 NS5 protein-like gene, partial sequence
# Database: /Volumes/Seagate_Exp_2/aedes_aegypti/blast_dbps/AaLVPC
# 0 hits found
# BLASTN 2.2.28+
# Query: gi|335355337|gb|JF707857.1| Flavivirus AV-2011/Spain strain
HU974_04 NS5 protein-like gene, partial sequence
# Database: /Volumes/Seagate_Exp_2/aedes_aegypti/blast_dbps/AaLVPC
# 0 hits found
# BLASTN 2.2.28+
# Query: gi|335355338|gb|JF707858.1| Flavivirus AV-2011/Spain strain
HU2316_06 NS5 protein-like gene, partial sequence
# Database: /Volumes/Seagate_Exp_2/aedes_aegypti/blast_dbps/AaLVPC
# 0 hits found
# BLASTN 2.2.28+
# Query: gi|335355339|gb|JF707859.1| Flavivirus AV-2011/Spain strain
GI102_01 NS5 protein-like gene, partial sequence
# Database: /Volumes/Seagate_Exp_2/aedes_aegypti/blast_dbps/AaLVPC
# 0 hits found
# BLASTN 2.2.28+
# Query: gi|335355340|gb|JF707860.1| Flavivirus AV-2011/Spain strain
GI6_01 NS5 protein-like gene, partial sequence
# Database: /Volumes/Seagate_Exp_2/aedes_aegypti/blast_dbps/AaLVPC
# 0 hits found
# BLASTN 2.2.28+
# Query: gi|667796634|gb|KF801604.1| Mosquito flavivirus strain
Av1106-TO/ITA/2012 nonfunctional NS5 protein gene, partial sequence
# Database: /Volumes/Seagate_Exp_2/aedes_aegypti/blast_dbps/AaLVPC
# 0 hits found
# BLASTN 2.2.28+
# Query: gi|667796629|gb|KF801601.1| Mosquito flavivirus strain
Av1014-VC/ITA/2012 nonfunctional NS5 protein gene, partial sequence
# Database: /Volumes/Seagate_Exp_2/aedes_aegypti/blast_dbps/AaLVPC
# 0 hits found
# BLASTN 2.2.28+
# Query: gi|667796609|gb|KF801590.1| Mosquito flavivirus strain Av569-
VC/ITA/2012 nonfunctional NS5 protein gene, partial sequence
# Database: /Volumes/Seagate_Exp_2/aedes_aegypti/blast_dbps/AaLVPC
# 0 hits found
# BLASTN 2.2.28+
# Query: gi|667796637|gb|KF801606.1| Mosquito flavivirus strain
Av1116-CN/ITA/2012 nonfunctional NS5 protein gene, partial sequence
# Database: /Volumes/Seagate_Exp_2/aedes_aegypti/blast_dbps/AaLVPC
# 0 hits found
# BLASTN 2.2.28+
# Query: gi|667796622|gb|KF801597.1| Mosquito flavivirus strain Av710-
VC/ITA/2012 nonfunctional NS5 protein gene, partial sequence

```



```
# Database: /Volumes/Seagate_Exp_2/aedes_aegypti/blast_dbps/AaLVPC
# 0 hits found
# BLASTN 2.2.28+
# Query: gi|667796630|gb|KF801602.1| Mosquito flavivirus strain
Av1020-TO/ITA/2012 NS5 protein gene, partial cds
# Database: /Volumes/Seagate_Exp_2/aedes_aegypti/blast_dbps/AaLVPC
# 0 hits found
# BLASTN 2.2.28+
# Query: gi|667796638|gb|KF801607.1| Mosquito flavivirus strain
Av1228-VC/ITA/2012 NS5 protein gene, partial cds
# Database: /Volumes/Seagate_Exp_2/aedes_aegypti/blast_dbps/AaLVPC
# 0 hits found
# BLAST processed 261 queries
```
