# Supplementary material
Source: PubMed Central journal article supplement (PMC4640774)
Supplement: pnas.1516410112.sd05.pdf [file pnas.1516410112.sd05.pdf]

**Table S3.4.** Mapping coordinates of sequences spanning partial or complete flaviviral ORFs in the *Aedes albopictus* genome assembly of the Foshan strain.

| <b>scaffold</b> | <b>Coordinates*</b> | <b>CSA</b> | <b>Flavivirus-like ORF (E value)</b>           |
|-----------------|---------------------|------------|------------------------------------------------|
| scaffold14636   | [3593,3904]         | Fo4214     | Cell Fusing Agent virus polyprotein (2e-51)    |
| scaffold14636   | [6591,8017]         | Fo4235-98  | Flavi_NS1, Polyprotein Aedes flavivirus (0.0)  |
| scaffold14636   | [8051,8578]         | Fo4310     | Flavi_NS1, Cell Fusing Agent Virus (6e-81)     |
| scaffold14636   | [8672,11117]        | Fo4905     | Cell Fusing Agent virus polyprotein (0.0)      |
| scaffold14636   | [22137,25119]       | Fo4902     | Polyprotein Aedes flavivirus (1e-73)           |
| scaffold15182   | [1,97]              | Fo2753**   | N/A                                            |
| scaffold15182   | [97,1547]           | Fo4901     | Flavi_NS5; polyprotein Dengue virus 1 (0.0)    |
| scaffold15182   | [7368,9298]         | Fo7000     | Polyprotein Dengue virus 1 (0.0)               |
| scaffold15182   | [15053,15097]       | Fo4903A    | Flavi_NS5; polyprotein Dengue virus 1 (0.0)    |
| scaffold15182   | [15088,16385]       | Fo4903B    | Flavi_NS5; polyprotein Dengue virus 1 (0.0)    |
| scaffold15182   | [9299,9397]         | Fo4904A*** | N/A                                            |
| scaffold15182   | [9397,15097]        | Fo4904B    | Polyprotein Dengue virus 1 (0.0)               |
| scaffold6867    | [37795,39550]       | Fo10       | Flavi_NS1, Cell Fusing Agent polyprotein (0.0) |
| scaffold6867    | [39551,40953]       | Fo4        | Polyprotein Aedes flavivirus (4e-24)           |
| scaffold8815    | [41283,4185]        | Fo2602     | Flavi_NS1 KRV (4e-77)                          |
| Scaffold4896    | [132356, 132897]    | Fo2275     | Flavi_NS1 (5e-78)                              |
| scaffold172623  | [110,677]           | Fo593      | Polyprotein Dengue virus type 2 (8e-128)       |
| scaffold2646    | [173080,174095]     | Fo8        | Flavi_NS5 KRV (0.0)                            |
| scaffold30874   | [1653,1962]         | Fo4209     | Cell Fusing Agent (1e-50)                      |
| scaffold5617    | [87732,87896]       | Fo21       | Flavi_NS5 (4e-17)                              |
| scaffold5617    | [88146,89672]       | Fo1        | Flavi_NS5 (0.034)                              |
| scaffold5617    | [79345,79735]       | Fo7005     | NS5 uncultured virus (1.2)                     |
| scaffold91      | [304081,304276]     | Fo6001     | Flavi_NS5, only 12 aa (no evalue)              |
| scaffold91      | [307467,307766]     | Fo7006     | Flavi_NS5 (5e-05)                              |

\* as derived by Blast analyses

\*\*sequence similarity to Fo4901

\*\*\*identical sequence as a portion of Fo4904B
