# Supplementary material
Source: PubMed Central journal article supplement (PMC4640774)
Supplement: pnas.1516410112.sd09.pdf [file pnas.1516410112.sd09.pdf]

**Table S4.1. Annotation of diapause related genes.**

| <i>Ae. aegypti</i> reference | Gene description                          | Putative <i>Ae. albopictus</i> duplicate? | Scaffold | Annotation source | Annotation type | Start coordinate | End coordinate | Strand |
|------------------------------|-------------------------------------------|-------------------------------------------|----------|-------------------|-----------------|------------------|----------------|--------|
| AAEL000188                   | elongase, putative                        | n                                         | 5228     | GLEAN             | mRNA            | 68395            | 83990          | -      |
| AAEL000188                   | elongase, putative                        | n                                         | 5228     | GLEAN             | UTR_5           | 83551            | 83990          | -      |
| AAEL000188                   | elongase, putative                        | n                                         | 5228     | GLEAN             | CDS             | 83490            | 83550          | -      |
| AAEL000188                   | elongase, putative                        | n                                         | 5228     | GLEAN             | CDS             | 83074            | 83405          | -      |
| AAEL000188                   | elongase, putative                        | n                                         | 5228     | GLEAN             | CDS             | 82900            | 83005          | -      |
| AAEL000188                   | elongase, putative                        | n                                         | 5228     | GLEAN             | CDS             | 69233            | 69369          | -      |
| AAEL000188                   | elongase, putative                        | n                                         | 5228     | GLEAN             | CDS             | 68814            | 68993          | -      |
| AAEL000188                   | elongase, putative                        | n                                         | 5228     | GLEAN             | UTR_3           | 68395            | 68813          | -      |
| AAEL000238                   | Clip-Domain Serine Protease family D      | y                                         | 4215     | maker             | gene            | 113672           | 126626         | +      |
| AAEL000238                   | Clip-Domain Serine Protease family D      | y                                         | 4215     | maker             | mRNA            | 113672           | 126626         | +      |
| AAEL000238                   | Clip-Domain Serine Protease family D      | y                                         | 4215     | maker             | exon            | 113672           | 114152         | +      |
| AAEL000238                   | Clip-Domain Serine Protease family D      | y                                         | 4215     | maker             | exon            | 114479           | 114656         | +      |
| AAEL000238                   | Clip-Domain Serine Protease family D      | y                                         | 4215     | maker             | exon            | 114722           | 114869         | +      |
| AAEL000238                   | Clip-Domain Serine Protease family D      | y                                         | 4215     | maker             | exon            | 126041           | 126626         | +      |
| AAEL000238                   | Clip-Domain Serine Protease family D      | y                                         | 4215     | maker             | exon            | 125823           | 125972         | +      |
| AAEL000238                   | Clip-Domain Serine Protease family D      | y                                         | 4215     | maker             | CDS             | 113672           | 114152         | +      |
| AAEL000238                   | Clip-Domain Serine Protease family D      | y                                         | 4215     | maker             | CDS             | 114479           | 114656         | +      |
| AAEL000238                   | Clip-Domain Serine Protease family D      | y                                         | 4215     | maker             | CDS             | 114722           | 114869         | +      |
| AAEL000238                   | Clip-Domain Serine Protease family D      | y                                         | 4215     | maker             | CDS             | 125823           | 125972         | +      |
| AAEL000238                   | Clip-Domain Serine Protease family D      | y                                         | 4215     | maker             | CDS             | 126041           | 126337         | +      |
| AAEL000238                   | Clip-Domain Serine Protease family D      | y                                         | 4215     | maker             | three_prime_UTR | 126338           | 126626         | +      |
| AAEL000238                   | Clip-Domain Serine Protease family D      | y                                         | 553      | maker             | gene            | 159474           | 172764         | -      |
| AAEL000238                   | Clip-Domain Serine Protease family D      | y                                         | 553      | maker             | mRNA            | 159474           | 172764         | -      |
| AAEL000238                   | Clip-Domain Serine Protease family D      | y                                         | 553      | maker             | exon            | 171799           | 171976         | -      |
| AAEL000238                   | Clip-Domain Serine Protease family D      | y                                         | 553      | maker             | exon            | 159474           | 160057         | -      |
| AAEL000238                   | Clip-Domain Serine Protease family D      | y                                         | 553      | maker             | exon            | 160126           | 160275         | -      |
| AAEL000238                   | Clip-Domain Serine Protease family D      | y                                         | 553      | maker             | exon            | 171587           | 171734         | -      |
| AAEL000238                   | Clip-Domain Serine Protease family D      | y                                         | 553      | maker             | exon            | 172290           | 172764         | -      |
| AAEL000238                   | Clip-Domain Serine Protease family D      | y                                         | 553      | maker             | CDS             | 172290           | 172764         | -      |
| AAEL000238                   | Clip-Domain Serine Protease family D      | y                                         | 553      | maker             | CDS             | 171799           | 171976         | -      |
| AAEL000238                   | Clip-Domain Serine Protease family D      | y                                         | 553      | maker             | CDS             | 171587           | 171734         | -      |
| AAEL000238                   | Clip-Domain Serine Protease family D      | y                                         | 553      | maker             | CDS             | 160126           | 160275         | -      |
| AAEL000238                   | Clip-Domain Serine Protease family D      | y                                         | 553      | maker             | CDS             | 159761           | 160057         | -      |
| AAEL000238                   | Clip-Domain Serine Protease family D      | y                                         | 553      | maker             | three_prime_UTR | 159474           | 159760         | -      |
| AAEL001036                   | ikappab kinase complex-associated protein | n                                         | 12079    | maker             | gene            | 3457             | 7899           | -      |
| AAEL001036                   | ikappab kinase complex-associated protein | n                                         | 12079    | maker             | mRNA            | 3457             | 7899           | -      |

|            |                                           |   |       |       |                 |        |        |   |
|------------|-------------------------------------------|---|-------|-------|-----------------|--------|--------|---|
| AAEL001036 | ikappab kinase complex-associated protein | n | 12079 | maker | exon            | 3457   | 3689   | - |
| AAEL001036 | ikappab kinase complex-associated protein | n | 12079 | maker | exon            | 3759   | 4129   | - |
| AAEL001036 | ikappab kinase complex-associated protein | n | 12079 | maker | exon            | 4332   | 7328   | - |
| AAEL001036 | ikappab kinase complex-associated protein | n | 12079 | maker | exon            | 7387   | 7899   | - |
| AAEL001036 | ikappab kinase complex-associated protein | n | 12079 | maker | five_prime_UTR  | 7788   | 7899   | - |
| AAEL001036 | ikappab kinase complex-associated protein | n | 12079 | maker | CDS             | 7387   | 7787   | - |
| AAEL001036 | ikappab kinase complex-associated protein | n | 12079 | maker | CDS             | 4332   | 7328   | - |
| AAEL001036 | ikappab kinase complex-associated protein | n | 12079 | maker | CDS             | 3759   | 4129   | - |
| AAEL001036 | ikappab kinase complex-associated protein | n | 12079 | maker | CDS             | 3625   | 3689   | - |
| AAEL001036 | ikappab kinase complex-associated protein | n | 12079 | maker | three_prime_UTR | 3457   | 3624   | - |
| AAEL001211 | COMPASS component SWD2, putative          | n | 2288  | maker | gene            | 160804 | 162366 | - |
| AAEL001211 | COMPASS component SWD2, putative          | n | 2288  | maker | mRNA            | 160804 | 162366 | - |
| AAEL001211 | COMPASS component SWD2, putative          | n | 2288  | maker | exon            | 160804 | 161180 | - |
| AAEL001211 | COMPASS component SWD2, putative          | n | 2288  | maker | exon            | 161456 | 162366 | - |
| AAEL001211 | COMPASS component SWD2, putative          | n | 2288  | maker | five_prime_UTR  | 162174 | 162366 | - |
| AAEL001211 | COMPASS component SWD2, putative          | n | 2288  | maker | CDS             | 161456 | 162173 | - |
| AAEL001211 | COMPASS component SWD2, putative          | n | 2288  | maker | CDS             | 160936 | 161180 | - |
| AAEL001211 | COMPASS component SWD2, putative          | n | 2288  | maker | three_prime_UTR | 160804 | 160935 | - |
| AAEL001673 | actin                                     | n | 378   | GLEAN | mRNA            | 32858  | 36767  | - |
| AAEL001673 | actin                                     | n | 378   | GLEAN | UTR_5           | 36592  | 36767  | - |
| AAEL001673 | actin                                     | n | 378   | GLEAN | CDS             | 36552  | 36591  | - |
| AAEL001673 | actin                                     | n | 378   | GLEAN | CDS             | 33259  | 34245  | - |
| AAEL001673 | actin                                     | n | 378   | GLEAN | CDS             | 33069  | 33172  | - |
| AAEL001673 | actin                                     | n | 378   | GLEAN | UTR_3           | 32858  | 33068  | - |
| AAEL001675 | Clip-Domain Serine Protease family A      | y | 2161  | maker | gene            | 119449 | 134120 | - |
| AAEL001675 | Clip-Domain Serine Protease family A      | y | 2161  | maker | mRNA            | 119449 | 124295 | - |
| AAEL001675 | Clip-Domain Serine Protease family A      | y | 2161  | maker | exon            | 122393 | 124295 | - |
| AAEL001675 | Clip-Domain Serine Protease family A      | y | 2161  | maker | exon            | 119449 | 120390 | - |
| AAEL001675 | Clip-Domain Serine Protease family A      | y | 2161  | maker | exon            | 120461 | 120774 | - |
| AAEL001675 | Clip-Domain Serine Protease family A      | y | 2161  | maker | exon            | 120885 | 121949 | - |
| AAEL001675 | Clip-Domain Serine Protease family A      | y | 2161  | maker | five_prime_UTR  | 124283 | 124295 | - |
| AAEL001675 | Clip-Domain Serine Protease family A      | y | 2161  | maker | CDS             | 122393 | 124282 | - |
| AAEL001675 | Clip-Domain Serine Protease family A      | y | 2161  | maker | CDS             | 120885 | 121949 | - |
| AAEL001675 | Clip-Domain Serine Protease family A      | y | 2161  | maker | CDS             | 120461 | 120774 | - |
| AAEL001675 | Clip-Domain Serine Protease family A      | y | 2161  | maker | CDS             | 119790 | 120390 | - |
| AAEL001675 | Clip-Domain Serine Protease family A      | y | 2161  | maker | three_prime_UTR | 119449 | 119789 | - |
| AAEL001675 | Clip-Domain Serine Protease family A      | y | 476   | maker | gene            | 400081 | 416927 | - |
| AAEL001675 | Clip-Domain Serine Protease family A      | y | 476   | maker | mRNA            | 400081 | 404917 | - |
| AAEL001675 | Clip-Domain Serine Protease family A      | y | 476   | maker | exon            | 403018 | 404917 | - |
| AAEL001675 | Clip-Domain Serine Protease family A      | y | 476   | maker | exon            | 400081 | 401022 | - |
| AAEL001675 | Clip-Domain Serine Protease family A      | y | 476   | maker | exon            | 401089 | 401399 | - |
| AAEL001675 | Clip-Domain Serine Protease family A      | y | 476   | maker | exon            | 401510 | 402574 | - |

|            |                                      |   |      |           |                          |        |        |   |
|------------|--------------------------------------|---|------|-----------|--------------------------|--------|--------|---|
| AAEL001675 | Clip-Domain Serine Protease family A | y | 476  | maker     | five_prime_UTR           | 404905 | 404917 | - |
| AAEL001675 | Clip-Domain Serine Protease family A | y | 476  | maker     | CDS                      | 403018 | 404904 | - |
| AAEL001675 | Clip-Domain Serine Protease family A | y | 476  | maker     | CDS                      | 401510 | 402574 | - |
| AAEL001675 | Clip-Domain Serine Protease family A | y | 476  | maker     | CDS                      | 401089 | 401399 | - |
| AAEL001675 | Clip-Domain Serine Protease family A | y | 476  | maker     | CDS                      | 400422 | 401022 | - |
| AAEL001675 | Clip-Domain Serine Protease family A | y | 476  | maker     | three_prime_UTR          | 400081 | 400421 | - |
| AAEL001764 | putative                             | n | 4944 | GLEAN     | mRNA                     | 93157  | 94058  | + |
| AAEL001764 | putative                             | n | 4944 | GLEAN     | UTR_5                    | 93157  | 93407  | + |
| AAEL001764 | putative                             | n | 4944 | GLEAN     | CDS                      | 93408  | 93678  | + |
| AAEL001764 | putative                             | n | 4944 | GLEAN     | CDS                      | 93746  | 93837  | + |
| AAEL001764 | putative                             | n | 4944 | GLEAN     | UTR_3                    | 93838  | 94058  | + |
| AAEL001764 | putative                             | n | 5227 | GLEAN     | mRNA                     | 45356  | 46162  | + |
| AAEL001764 | putative                             | n | 5227 | GLEAN     | UTR_5                    | 45356  | 45519  | + |
| AAEL001764 | putative                             | n | 5227 | GLEAN     | CDS                      | 45520  | 45790  | + |
| AAEL001764 | putative                             | n | 5227 | GLEAN     | CDS                      | 45850  | 45941  | + |
| AAEL001764 | putative                             | n | 5227 | GLEAN     | UTR_3                    | 45942  | 46162  | + |
| AAEL002067 | cytochrome P450                      | n | 460  | maker     | gene                     | 285118 | 302537 | + |
| AAEL002067 | cytochrome P450                      | n | 460  | maker     | mRNA                     | 285118 | 302537 | + |
| AAEL002067 | cytochrome P450                      | n | 460  | maker     | exon                     | 285118 | 285259 | + |
| AAEL002067 | cytochrome P450                      | n | 460  | maker     | exon                     | 300854 | 301337 | + |
| AAEL002067 | cytochrome P450                      | n | 460  | maker     | exon                     | 301399 | 301579 | + |
| AAEL002067 | cytochrome P450                      | n | 460  | maker     | exon                     | 301637 | 302180 | + |
| AAEL002067 | cytochrome P450                      | n | 460  | maker     | exon                     | 302236 | 302537 | + |
| AAEL002067 | cytochrome P450                      | n | 460  | maker     | five_prime_UTR           | 285118 | 285174 | + |
| AAEL002067 | cytochrome P450                      | n | 460  | maker     | CDS                      | 285175 | 285259 | + |
| AAEL002067 | cytochrome P450                      | n | 460  | maker     | CDS                      | 300854 | 301337 | + |
| AAEL002067 | cytochrome P450                      | n | 460  | maker     | CDS                      | 301399 | 301579 | + |
| AAEL002067 | cytochrome P450                      | n | 460  | maker     | CDS                      | 301637 | 302180 | + |
| AAEL002067 | cytochrome P450                      | n | 460  | maker     | CDS                      | 302236 | 302420 | + |
| AAEL002067 | cytochrome P450                      | n | 460  | maker     | three_prime_UTR          | 302421 | 302537 | + |
| AAEL002110 | cuticle protein, putative            | n | 779  | exonerate | expressed_sequence_match | 51678  | 52579  | + |
| AAEL002110 | cuticle protein, putative            | n | 779  | exonerate | match_part               | 51678  | 51929  | + |
| AAEL002110 | cuticle protein, putative            | n | 779  | exonerate | match_part               | 51998  | 52223  | + |
| AAEL002110 | cuticle protein, putative            | n | 779  | exonerate | match_part               | 52301  | 52579  | + |
| AAEL002618 | odorant binding protein OBP65        | n | 5096 | maker     | gene                     | 54888  | 55564  | + |
| AAEL002618 | odorant binding protein OBP65        | n | 5096 | maker     | mRNA                     | 54999  | 55564  | + |
| AAEL002618 | odorant binding protein OBP65        | n | 5096 | maker     | exon                     | 55284  | 55564  | + |
| AAEL002618 | odorant binding protein OBP65        | n | 5096 | maker     | exon                     | 54999  | 55218  | + |
| AAEL002618 | odorant binding protein OBP65        | n | 5096 | maker     | five_prime_UTR           | 54999  | 55080  | + |
| AAEL002618 | odorant binding protein OBP65        | n | 5096 | maker     | CDS                      | 55081  | 55218  | + |
| AAEL002618 | odorant binding protein OBP65        | n | 5096 | maker     | CDS                      | 55284  | 55520  | + |

|            |                                     |   |       |           |                              |        |        |   |
|------------|-------------------------------------|---|-------|-----------|------------------------------|--------|--------|---|
| AAEL002618 | odorant binding protein OBP65       | n | 5096  | maker     | three_prime_UTR              | 55521  | 55564  | + |
| AAEL002772 | chromo domain protein               | n | 10760 | maker     | gene                         | 12117  | 13706  | - |
| AAEL002772 | chromo domain protein               | n | 10760 | maker     | mRNA                         | 12117  | 13706  | - |
| AAEL002772 | chromo domain protein               | n | 10760 | maker     | exon                         | 12117  | 13304  | - |
| AAEL002772 | chromo domain protein               | n | 10760 | maker     | exon                         | 13377  | 13494  | - |
| AAEL002772 | chromo domain protein               | n | 10760 | maker     | exon                         | 13561  | 13706  | - |
| AAEL002772 | chromo domain protein               | n | 10760 | maker     | five_prime_UTR               | 13589  | 13706  | - |
| AAEL002772 | chromo domain protein               | n | 10760 | maker     | CDS                          | 13561  | 13588  | - |
| AAEL002772 | chromo domain protein               | n | 10760 | maker     | CDS                          | 13377  | 13494  | - |
| AAEL002772 | chromo domain protein               | n | 10760 | maker     | CDS                          | 12266  | 13304  | - |
| AAEL002772 | chromo domain protein               | n | 10760 | maker     | three_prime_UTR              | 12117  | 12265  | - |
| AAEL003049 | pupal cuticle protein 78E, putative | y | 10554 | exonerate | expressed_sequence_mat<br>ch | 11878  | 13496  | - |
| AAEL003049 | pupal cuticle protein 78E, putative | y | 10554 | exonerate | match_part                   | 13202  | 13496  | - |
| AAEL003049 | pupal cuticle protein 78E, putative | y | 10554 | exonerate | match_part                   | 12824  | 13077  | - |
| AAEL003049 | pupal cuticle protein 78E, putative | y | 10554 | exonerate | match_part                   | 11878  | 12762  | - |
| AAEL003049 | pupal cuticle protein 78E, putative | y | 3655  | maker     | gene                         | 143921 | 145549 | + |
| AAEL003049 | pupal cuticle protein 78E, putative | y | 3655  | maker     | mRNA                         | 143921 | 145549 | + |
| AAEL003049 | pupal cuticle protein 78E, putative | y | 3655  | maker     | exon                         | 144687 | 145549 | + |
| AAEL003049 | pupal cuticle protein 78E, putative | y | 3655  | maker     | exon                         | 144368 | 144621 | + |
| AAEL003049 | pupal cuticle protein 78E, putative | y | 3655  | maker     | exon                         | 143921 | 144243 | + |
| AAEL003049 | pupal cuticle protein 78E, putative | y | 3655  | maker     | five_prime_UTR               | 143921 | 143952 | + |
| AAEL003049 | pupal cuticle protein 78E, putative | y | 3655  | maker     | CDS                          | 143953 | 144243 | + |
| AAEL003049 | pupal cuticle protein 78E, putative | y | 3655  | maker     | CDS                          | 144368 | 144621 | + |
| AAEL003049 | pupal cuticle protein 78E, putative | y | 3655  | maker     | CDS                          | 144687 | 145194 | + |
| AAEL003049 | pupal cuticle protein 78E, putative | y | 3655  | maker     | three_prime_UTR              | 145195 | 145549 | + |
| AAEL003140 | retinoblastoma binding protein      | n | 4894  | maker     | gene                         | 27616  | 29734  | - |
| AAEL003140 | retinoblastoma binding protein      | n | 4894  | maker     | mRNA                         | 27616  | 29734  | - |
| AAEL003140 | retinoblastoma binding protein      | n | 4894  | maker     | exon                         | 27616  | 27903  | - |
| AAEL003140 | retinoblastoma binding protein      | n | 4894  | maker     | exon                         | 27963  | 28603  | - |
| AAEL003140 | retinoblastoma binding protein      | n | 4894  | maker     | exon                         | 28662  | 28781  | - |
| AAEL003140 | retinoblastoma binding protein      | n | 4894  | maker     | exon                         | 28851  | 29032  | - |
| AAEL003140 | retinoblastoma binding protein      | n | 4894  | maker     | exon                         | 29095  | 29522  | - |
| AAEL003140 | retinoblastoma binding protein      | n | 4894  | maker     | exon                         | 29603  | 29734  | - |
| AAEL003140 | retinoblastoma binding protein      | n | 4894  | maker     | five_prime_UTR               | 29622  | 29734  | - |
| AAEL003140 | retinoblastoma binding protein      | n | 4894  | maker     | CDS                          | 29603  | 29621  | - |
| AAEL003140 | retinoblastoma binding protein      | n | 4894  | maker     | CDS                          | 29095  | 29522  | - |
| AAEL003140 | retinoblastoma binding protein      | n | 4894  | maker     | CDS                          | 28851  | 29032  | - |
| AAEL003140 | retinoblastoma binding protein      | n | 4894  | maker     | CDS                          | 28662  | 28781  | - |
| AAEL003140 | retinoblastoma binding protein      | n | 4894  | maker     | CDS                          | 27963  | 28603  | - |
| AAEL003140 | retinoblastoma binding protein      | n | 4894  | maker     | CDS                          | 27818  | 27903  | - |
| AAEL003140 | retinoblastoma binding protein      | n | 4894  | maker     | three_prime_UTR              | 27616  | 27817  | - |

|            |                                |   |      |       |                 |        |        |   |
|------------|--------------------------------|---|------|-------|-----------------|--------|--------|---|
| AAEL003517 | conserved hypothetical protein | n | 297  | maker | gene            | 29230  | 31668  | + |
| AAEL003517 | conserved hypothetical protein | n | 297  | maker | mRNA            | 29230  | 31668  | + |
| AAEL003517 | conserved hypothetical protein | n | 297  | maker | exon            | 29230  | 30844  | + |
| AAEL003517 | conserved hypothetical protein | n | 297  | maker | exon            | 30926  | 31323  | + |
| AAEL003517 | conserved hypothetical protein | n | 297  | maker | exon            | 31394  | 31668  | + |
| AAEL003517 | conserved hypothetical protein | n | 297  | maker | five_prime_UTR  | 29230  | 29644  | + |
| AAEL003517 | conserved hypothetical protein | n | 297  | maker | CDS             | 29645  | 30844  | + |
| AAEL003517 | conserved hypothetical protein | n | 297  | maker | CDS             | 30926  | 31323  | + |
| AAEL003517 | conserved hypothetical protein | n | 297  | maker | CDS             | 31394  | 31436  | + |
| AAEL003517 | conserved hypothetical protein | n | 297  | maker | three_prime_UTR | 31437  | 31668  | + |
| AAEL003674 | conserved hypothetical protein | n | 48   | maker | gene            | 756651 | 759126 | - |
| AAEL003674 | conserved hypothetical protein | n | 48   | maker | mRNA            | 756651 | 759126 | - |
| AAEL003674 | conserved hypothetical protein | n | 48   | maker | exon            | 756651 | 756874 | - |
| AAEL003674 | conserved hypothetical protein | n | 48   | maker | exon            | 756945 | 757059 | - |
| AAEL003674 | conserved hypothetical protein | n | 48   | maker | exon            | 757128 | 757605 | - |
| AAEL003674 | conserved hypothetical protein | n | 48   | maker | exon            | 758085 | 758212 | - |
| AAEL003674 | conserved hypothetical protein | n | 48   | maker | exon            | 758979 | 759126 | - |
| AAEL003674 | conserved hypothetical protein | n | 48   | maker | five_prime_UTR  | 759124 | 759126 | - |
| AAEL003674 | conserved hypothetical protein | n | 48   | maker | CDS             | 758979 | 759123 | - |
| AAEL003674 | conserved hypothetical protein | n | 48   | maker | CDS             | 758085 | 758212 | - |
| AAEL003674 | conserved hypothetical protein | n | 48   | maker | CDS             | 757128 | 757605 | - |
| AAEL003674 | conserved hypothetical protein | n | 48   | maker | CDS             | 756945 | 757059 | - |
| AAEL003674 | conserved hypothetical protein | n | 48   | maker | CDS             | 756850 | 756874 | - |
| AAEL003674 | conserved hypothetical protein | n | 48   | maker | three_prime_UTR | 756651 | 756849 | - |
| AAEL003921 | ubiquitin, putative            | n | 3968 | maker | gene            | 155027 | 155708 | - |
| AAEL003921 | ubiquitin, putative            | n | 3968 | maker | mRNA            | 155027 | 155708 | - |
| AAEL003921 | ubiquitin, putative            | n | 3968 | maker | exon            | 155027 | 155462 | - |
| AAEL003921 | ubiquitin, putative            | n | 3968 | maker | exon            | 155522 | 155708 | - |
| AAEL003921 | ubiquitin, putative            | n | 3968 | maker | five_prime_UTR  | 155570 | 155708 | - |
| AAEL003921 | ubiquitin, putative            | n | 3968 | maker | CDS             | 155522 | 155569 | - |
| AAEL003921 | ubiquitin, putative            | n | 3968 | maker | CDS             | 155109 | 155462 | - |
| AAEL003921 | ubiquitin, putative            | n | 3968 | maker | three_prime_UTR | 155027 | 155108 | - |
| AAEL003968 | helicase                       | n | 912  | maker | gene            | 34760  | 45063  | + |
| AAEL003968 | helicase                       | n | 912  | maker | mRNA            | 34760  | 45063  | + |
| AAEL003968 | helicase                       | n | 912  | maker | mRNA            | 34760  | 45063  | + |
| AAEL003968 | helicase                       | n | 912  | maker | exon            | 34760  | 36151  | + |
| AAEL003968 | helicase                       | n | 912  | maker | exon            | 42538  | 43524  | + |
| AAEL003968 | helicase                       | n | 912  | maker | exon            | 44237  | 45063  | + |
| AAEL003968 | helicase                       | n | 912  | maker | five_prime_UTR  | 34760  | 34807  | + |
| AAEL003968 | helicase                       | n | 912  | maker | CDS             | 34808  | 36151  | + |
| AAEL003968 | helicase                       | n | 912  | maker | CDS             | 42538  | 43524  | + |
| AAEL003968 | helicase                       | n | 912  | maker | CDS             | 44237  | 44647  | + |

|            |                                   |   |       |       |                 |        |        |   |
|------------|-----------------------------------|---|-------|-------|-----------------|--------|--------|---|
| AAEL003968 | helicase                          | n | 912   | maker | three_prime_UTR | 44648  | 45063  | + |
| AAEL004004 | chromatin regulatory protein sir2 | y | 578   | maker | gene            | 383817 | 385140 | - |
| AAEL004004 | chromatin regulatory protein sir2 | y | 578   | maker | mRNA            | 383817 | 385140 | - |
| AAEL004004 | chromatin regulatory protein sir2 | y | 578   | maker | exon            | 383817 | 384810 | - |
| AAEL004004 | chromatin regulatory protein sir2 | y | 578   | maker | exon            | 384882 | 385140 | - |
| AAEL004004 | chromatin regulatory protein sir2 | y | 578   | maker | five_prime_UTR  | 385063 | 385140 | - |
| AAEL004004 | chromatin regulatory protein sir2 | y | 578   | maker | CDS             | 384882 | 385062 | . |
| AAEL004004 | chromatin regulatory protein sir2 | y | 578   | maker | CDS             | 384059 | 384810 | - |
| AAEL004004 | chromatin regulatory protein sir2 | y | 578   | maker | three_prime_UTR | 383817 | 384058 | - |
| AAEL004004 | chromatin regulatory protein sir2 | y | 628   | maker | gene            | 158630 | 159953 | - |
| AAEL004004 | chromatin regulatory protein sir2 | y | 628   | maker | mRNA            | 158630 | 159953 | - |
| AAEL004004 | chromatin regulatory protein sir2 | y | 628   | maker | exon            | 158630 | 159623 | - |
| AAEL004004 | chromatin regulatory protein sir2 | y | 628   | maker | exon            | 159695 | 159953 | - |
| AAEL004004 | chromatin regulatory protein sir2 | y | 628   | maker | five_prime_UTR  | 159876 | 159953 | - |
| AAEL004004 | chromatin regulatory protein sir2 | y | 628   | maker | CDS             | 159695 | 159875 | - |
| AAEL004004 | chromatin regulatory protein sir2 | y | 628   | maker | CDS             | 158872 | 159623 | - |
| AAEL004004 | chromatin regulatory protein sir2 | y | 628   | maker | three_prime_UTR | 158630 | 158871 | - |
| AAEL004146 | cryptochrome 1                    | n | 10370 | maker | gene            | 32452  | 54508  | - |
| AAEL004146 | cryptochrome 1                    | n | 10370 | maker | mRNA            | 32452  | 54508  | - |
| AAEL004146 | cryptochrome 1                    | n | 10370 | maker | exon            | 32452  | 33011  | - |
| AAEL004146 | cryptochrome 1                    | n | 10370 | maker | exon            | 35140  | 35388  | - |
| AAEL004146 | cryptochrome 1                    | n | 10370 | maker | exon            | 35455  | 36119  | - |
| AAEL004146 | cryptochrome 1                    | n | 10370 | maker | exon            | 36443  | 36777  | - |
| AAEL004146 | cryptochrome 1                    | n | 10370 | maker | exon            | 53979  | 54508  | - |
| AAEL004146 | cryptochrome 1                    | n | 10370 | maker | five_prime_UTR  | 54133  | 54508  | - |
| AAEL004146 | cryptochrome 1                    | n | 10370 | maker | CDS             | 53979  | 54132  | - |
| AAEL004146 | cryptochrome 1                    | n | 10370 | maker | CDS             | 36443  | 36777  | - |
| AAEL004146 | cryptochrome 1                    | n | 10370 | maker | CDS             | 35455  | 36119  | - |
| AAEL004146 | cryptochrome 1                    | n | 10370 | maker | CDS             | 35140  | 35388  | - |
| AAEL004146 | cryptochrome 1                    | n | 10370 | maker | CDS             | 32768  | 33011  | - |
| AAEL004146 | cryptochrome 1                    | n | 10370 | maker | three_prime_UTR | 32452  | 32767  | - |
| AAEL004182 | conserved hypothetical protein    | n | 10551 | maker | gene            | 39450  | 41364  | - |
| AAEL004182 | conserved hypothetical protein    | n | 10551 | maker | mRNA            | 39450  | 41364  | - |
| AAEL004182 | conserved hypothetical protein    | n | 10551 | maker | exon            | 39450  | 39673  | - |
| AAEL004182 | conserved hypothetical protein    | n | 10551 | maker | exon            | 39743  | 41078  | - |
| AAEL004182 | conserved hypothetical protein    | n | 10551 | maker | exon            | 41174  | 41364  | - |
| AAEL004182 | conserved hypothetical protein    | n | 10551 | maker | five_prime_UTR  | 41266  | 41364  | - |
| AAEL004182 | conserved hypothetical protein    | n | 10551 | maker | CDS             | 41174  | 41265  | - |
| AAEL004182 | conserved hypothetical protein    | n | 10551 | maker | CDS             | 39743  | 41078  | - |
| AAEL004182 | conserved hypothetical protein    | n | 10551 | maker | CDS             | 39581  | 39673  | - |
| AAEL004182 | conserved hypothetical protein    | n | 10551 | maker | three_prime_UTR | 39450  | 39580  | - |

|            |                                      |   |      |           |                          |        |        |   |
|------------|--------------------------------------|---|------|-----------|--------------------------|--------|--------|---|
| AAEL004280 | Osiris, putative                     | n | 2247 | exonerate | expressed_sequence_match | 196620 | 197898 | + |
| AAEL004280 | Osiris, putative                     | n | 2247 | exonerate | match_part               | 196620 | 196871 | + |
| AAEL004280 | Osiris, putative                     | n | 2247 | exonerate | match_part               | 196895 | 197898 | + |
| AAEL004574 | SAGA-associated factor 11 homolog    | y | 3540 | cufflinks | mRNA                     | 34370  | 40882  | + |
| AAEL004574 | SAGA-associated factor 11 homolog    | y | 3540 | cufflinks | UTR_5                    | 34370  | 34524  | + |
| AAEL004574 | SAGA-associated factor 11 homolog    | y | 3540 | cufflinks | CDS                      | 34525  | 34885  | + |
| AAEL004574 | SAGA-associated factor 11 homolog    | y | 3540 | cufflinks | CDS                      | 40125  | 40306  | + |
| AAEL004574 | SAGA-associated factor 11 homolog    | y | 3540 | cufflinks | UTR_3                    | 40307  | 40882  | + |
| AAEL004574 | SAGA-associated factor 11 homolog    | y | 5236 | cufflinks | mRNA                     | 75534  | 78299  | + |
| AAEL004574 | SAGA-associated factor 11 homolog    | y | 5236 | cufflinks | UTR_5                    | 75534  | 75673  | + |
| AAEL004574 | SAGA-associated factor 11 homolog    | y | 5236 | cufflinks | CDS                      | 75674  | 76034  | + |
| AAEL004574 | SAGA-associated factor 11 homolog    | y | 5236 | cufflinks | CDS                      | 77542  | 77723  | + |
| AAEL004574 | SAGA-associated factor 11 homolog    | y | 5236 | cufflinks | UTR_3                    | 77724  | 78299  | + |
| AAEL004675 | conserved hypothetical protein       | n | 1828 | maker     | gene                     | 109147 | 111544 | - |
| AAEL004675 | conserved hypothetical protein       | n | 1828 | maker     | mRNA                     | 109147 | 111544 | - |
| AAEL004675 | conserved hypothetical protein       | n | 1828 | maker     | exon                     | 110856 | 111544 | - |
| AAEL004675 | conserved hypothetical protein       | n | 1828 | maker     | exon                     | 109147 | 109556 | - |
| AAEL004675 | conserved hypothetical protein       | n | 1828 | maker     | exon                     | 109617 | 110016 | - |
| AAEL004675 | conserved hypothetical protein       | n | 1828 | maker     | exon                     | 110115 | 110787 | - |
| AAEL004675 | conserved hypothetical protein       | n | 1828 | maker     | five_prime_UTR           | 111115 | 111544 | - |
| AAEL004675 | conserved hypothetical protein       | n | 1828 | maker     | CDS                      | 110856 | 111114 | - |
| AAEL004675 | conserved hypothetical protein       | n | 1828 | maker     | CDS                      | 110115 | 110787 | - |
| AAEL004675 | conserved hypothetical protein       | n | 1828 | maker     | CDS                      | 109617 | 110016 | - |
| AAEL004675 | conserved hypothetical protein       | n | 1828 | maker     | CDS                      | 109398 | 109556 | - |
| AAEL004675 | conserved hypothetical protein       | n | 1828 | maker     | three_prime_UTR          | 109147 | 109397 | - |
| AAEL004870 | cytochrome P450                      | n | 6622 | exonerate | expressed_sequence_match | 71434  | 81812  | + |
| AAEL004870 | cytochrome P450                      | n | 6622 | exonerate | match_part               | 71434  | 72138  | + |
| AAEL004870 | cytochrome P450                      | n | 6622 | exonerate | match_part               | 76735  | 76856  | + |
| AAEL004870 | cytochrome P450                      | n | 6622 | exonerate | match_part               | 76953  | 77382  | + |
| AAEL004870 | cytochrome P450                      | n | 6622 | exonerate | match_part               | 77476  | 77740  | + |
| AAEL004870 | cytochrome P450                      | n | 6622 | exonerate | match_part               | 79338  | 81812  | + |
| AAEL004983 | Inhibitor of growth proteining, ing4 | n | 4939 | GLEAN     | mRNA                     | 86505  | 99281  | - |
| AAEL004983 | Inhibitor of growth proteining, ing4 | n | 4939 | GLEAN     | UTR_5                    | 99120  | 99281  | - |
| AAEL004983 | Inhibitor of growth proteining, ing4 | n | 4939 | GLEAN     | CDS                      | 99163  | 99199  | - |
| AAEL004983 | Inhibitor of growth proteining, ing4 | n | 4939 | GLEAN     | CDS                      | 98525  | 99090  | - |
| AAEL004983 | Inhibitor of growth proteining, ing4 | n | 4939 | GLEAN     | CDS                      | 87182  | 87337  | - |
| AAEL004983 | Inhibitor of growth proteining, ing4 | n | 4939 | GLEAN     | CDS                      | 87012  | 87113  | - |
| AAEL004983 | Inhibitor of growth proteining, ing4 | n | 4939 | GLEAN     | UTR_3                    | 86505  | 87011  | - |
| AAEL005255 | PAR-domain protein 1                 | n | 1990 | maker     | gene                     | 42223  | 70158  | + |
| AAEL005255 | PAR-domain protein 1                 | n | 1990 | maker     | mRNA                     | 42223  | 70158  | + |

|            |                                                 |   |      |       |                 |        |        |   |
|------------|-------------------------------------------------|---|------|-------|-----------------|--------|--------|---|
| AAEL005255 | PAR-domain protein 1                            | n | 1990 | maker | exon            | 42223  | 42381  | + |
| AAEL005255 | PAR-domain protein 1                            | n | 1990 | maker | exon            | 53364  | 53592  | + |
| AAEL005255 | PAR-domain protein 1                            | n | 1990 | maker | exon            | 66382  | 66638  | + |
| AAEL005255 | PAR-domain protein 1                            | n | 1990 | maker | exon            | 69782  | 70158  | + |
| AAEL005255 | PAR-domain protein 1                            | n | 1990 | maker | CDS             | 42223  | 42381  | + |
| AAEL005255 | PAR-domain protein 1                            | n | 1990 | maker | CDS             | 53364  | 53592  | + |
| AAEL005255 | PAR-domain protein 1                            | n | 1990 | maker | CDS             | 66382  | 66638  | + |
| AAEL005255 | PAR-domain protein 1                            | n | 1990 | maker | CDS             | 69782  | 69868  | + |
| AAEL005255 | PAR-domain protein 1                            | n | 1990 | maker | three_prime_UTR | 69869  | 70158  | + |
| AAEL006013 | huntingtin interacting protein                  | n | 2761 | GLEAN | mRNA            | 133783 | 161252 | - |
| AAEL006013 | huntingtin interacting protein                  | n | 2761 | GLEAN | CDS             | 161151 | 161252 | - |
| AAEL006013 | huntingtin interacting protein                  | n | 2761 | GLEAN | CDS             | 154666 | 155211 | - |
| AAEL006013 | huntingtin interacting protein                  | n | 2761 | GLEAN | CDS             | 148556 | 154583 | - |
| AAEL006013 | huntingtin interacting protein                  | n | 2761 | GLEAN | CDS             | 134695 | 134900 | - |
| AAEL006013 | huntingtin interacting protein                  | n | 2761 | GLEAN | CDS             | 134031 | 134633 | - |
| AAEL006013 | huntingtin interacting protein                  | n | 2761 | GLEAN | CDS             | 133783 | 133962 | - |
| AAEL006082 | transcription initiation factor TFIID subunit 1 | y | 8627 | maker | gene            | 50503  | 64109  | - |
| AAEL006082 | transcription initiation factor TFIID subunit 1 | y | 8627 | maker | mRNA            | 50503  | 64109  | - |
| AAEL006082 | transcription initiation factor TFIID subunit 1 | y | 8627 | maker | exon            | 50503  | 51177  | - |
| AAEL006082 | transcription initiation factor TFIID subunit 1 | y | 8627 | maker | exon            | 51399  | 51812  | - |
| AAEL006082 | transcription initiation factor TFIID subunit 1 | y | 8627 | maker | exon            | 53614  | 53800  | - |
| AAEL006082 | transcription initiation factor TFIID subunit 1 | y | 8627 | maker | exon            | 53857  | 53955  | - |
| AAEL006082 | transcription initiation factor TFIID subunit 1 | y | 8627 | maker | exon            | 54019  | 55463  | - |
| AAEL006082 | transcription initiation factor TFIID subunit 1 | y | 8627 | maker | exon            | 59775  | 60333  | - |
| AAEL006082 | transcription initiation factor TFIID subunit 1 | y | 8627 | maker | exon            | 60394  | 63241  | - |
| AAEL006082 | transcription initiation factor TFIID subunit 1 | y | 8627 | maker | exon            | 63551  | 64109  | - |
| AAEL006082 | transcription initiation factor TFIID subunit 1 | y | 8627 | maker | five_prime_UTR  | 63721  | 64109  | - |
| AAEL006082 | transcription initiation factor TFIID subunit 1 | y | 8627 | maker | CDS             | 63551  | 63720  | - |
| AAEL006082 | transcription initiation factor TFIID subunit 1 | y | 8627 | maker | CDS             | 60394  | 63241  | - |
| AAEL006082 | transcription initiation factor TFIID subunit 1 | y | 8627 | maker | CDS             | 59775  | 60333  | - |
| AAEL006082 | transcription initiation factor TFIID subunit 1 | y | 8627 | maker | CDS             | 54019  | 55463  | - |
| AAEL006082 | transcription initiation factor TFIID subunit 1 | y | 8627 | maker | CDS             | 53857  | 53955  | - |
| AAEL006082 | transcription initiation factor TFIID subunit 1 | y | 8627 | maker | CDS             | 53614  | 53800  | - |
| AAEL006082 | transcription initiation factor TFIID subunit 1 | y | 8627 | maker | CDS             | 51399  | 51812  | - |
| AAEL006082 | transcription initiation factor TFIID subunit 1 | y | 8627 | maker | CDS             | 50582  | 51177  | - |
| AAEL006082 | transcription initiation factor TFIID subunit 1 | y | 8627 | maker | three_prime_UTR | 50503  | 50581  | - |
| AAEL006082 | transcription initiation factor TFIID subunit 1 | y | 9666 | maker | gene            | 45990  | 57790  | + |
| AAEL006082 | transcription initiation factor TFIID subunit 1 | y | 9666 | maker | mRNA            | 45990  | 57790  | + |
| AAEL006082 | transcription initiation factor TFIID subunit 1 | y | 9666 | maker | exon            | 45990  | 46552  | + |
| AAEL006082 | transcription initiation factor TFIID subunit 1 | y | 9666 | maker | exon            | 47383  | 50230  | + |
| AAEL006082 | transcription initiation factor TFIID subunit 1 | y | 9666 | maker | exon            | 50305  | 50863  | + |
| AAEL006082 | transcription initiation factor TFIID subunit 1 | y | 9666 | maker | exon            | 53006  | 54450  | + |



|            |                                                   |   |      |           |                          |        |        |   |
|------------|---------------------------------------------------|---|------|-----------|--------------------------|--------|--------|---|
| AAEL006082 | transcription initiation factor TFIID subunit 1   | y | 9666 | maker     | exon                     | 54514  | 54612  | + |
| AAEL006082 | transcription initiation factor TFIID subunit 1   | y | 9666 | maker     | exon                     | 54670  | 54856  | + |
| AAEL006082 | transcription initiation factor TFIID subunit 1   | y | 9666 | maker     | exon                     | 56481  | 56894  | + |
| AAEL006082 | transcription initiation factor TFIID subunit 1   | y | 9666 | maker     | exon                     | 57116  | 57790  | + |
| AAEL006082 | transcription initiation factor TFIID subunit 1   | y | 9666 | maker     | exon                     | 52995  | 54450  | + |
| AAEL006082 | transcription initiation factor TFIID subunit 1   | y | 9666 | maker     | five_prime_UTR           | 45990  | 46373  | + |
| AAEL006082 | transcription initiation factor TFIID subunit 1   | y | 9666 | maker     | CDS(tentative)           | 46374  | 46552  | + |
| AAEL006082 | transcription initiation factor TFIID subunit 1   | y | 9666 | maker     | CDS                      | 47383  | 50230  | + |
| AAEL006082 | transcription initiation factor TFIID subunit 1   | y | 9666 | maker     | CDS                      | 50305  | 50863  | + |
| AAEL006082 | transcription initiation factor TFIID subunit 1   | y | 9666 | maker     | CDS                      | 53006  | 54450  | + |
| AAEL006082 | transcription initiation factor TFIID subunit 1   | y | 9666 | maker     | CDS                      | 54514  | 54612  | + |
| AAEL006082 | transcription initiation factor TFIID subunit 1   | y | 9666 | maker     | CDS                      | 54670  | 54856  | + |
| AAEL006082 | transcription initiation factor TFIID subunit 1   | y | 9666 | maker     | CDS                      | 56481  | 56894  | + |
| AAEL006082 | transcription initiation factor TFIID subunit 1   | y | 9666 | maker     | CDS                      | 57116  | 57711  | + |
| AAEL006082 | transcription initiation factor TFIID subunit 1   | y | 9666 | maker     | three_prime_UTR          | 57712  | 57790  | + |
| AAEL006280 | juvenile hormone acid methyltransferase, putative | n | 4569 | exonerate | expressed_sequence_match | 32675  | 41351  | + |
| AAEL006280 | juvenile hormone acid methyltransferase, putative | n | 4569 | exonerate | match_part               | 32675  | 33138  | + |
| AAEL006280 | juvenile hormone acid methyltransferase, putative | n | 4569 | exonerate | match_part               | 40048  | 40328  | + |
| AAEL006280 | juvenile hormone acid methyltransferase, putative | n | 4569 | exonerate | match_part               | 40426  | 41351  | + |
| AAEL006655 | chromatin regulatory protein sir2                 | n | 4128 | GLEAN     | mRNA                     | 117314 | 119935 | - |
| AAEL006655 | chromatin regulatory protein sir2                 | n | 4128 | GLEAN     | UTR_5                    | 119683 | 119935 | - |
| AAEL006655 | chromatin regulatory protein sir2                 | n | 4128 | GLEAN     | CDS                      | 119557 | 119682 | - |
| AAEL006655 | chromatin regulatory protein sir2                 | n | 4128 | GLEAN     | CDS                      | 117314 | 119485 | - |
| AAEL006782 | protein arginine n-methyltransferase              | n | 8070 | GLEAN     | mRNA                     | 63057  | 79560  | + |
| AAEL006782 | protein arginine n-methyltransferase              | n | 8070 | GLEAN     | CDS                      | 63057  | 63561  | + |
| AAEL006782 | protein arginine n-methyltransferase              | n | 8070 | GLEAN     | CDS                      | 78340  | 79610  | + |
| AAEL006782 | protein arginine n-methyltransferase              | n | 8070 | GLEAN     | UTR_3                    | 79611  | 79560  | + |
| AAEL006789 | tbp-associated factor                             | y | 4299 | maker     | gene                     | 152150 | 153228 | + |
| AAEL006789 | tbp-associated factor                             | y | 4299 | maker     | mRNA                     | 152150 | 153228 | + |
| AAEL006789 | tbp-associated factor                             | y | 4299 | maker     | exon                     | 152493 | 153228 | + |
| AAEL006789 | tbp-associated factor                             | y | 4299 | maker     | exon                     | 152272 | 152434 | + |
| AAEL006789 | tbp-associated factor                             | y | 4299 | maker     | exon                     | 152150 | 152211 | + |
| AAEL006789 | tbp-associated factor                             | y | 4299 | maker     | five_prime_UTR           | 152150 | 152202 | + |
| AAEL006789 | tbp-associated factor                             | y | 4299 | maker     | CDS                      | 152203 | 152211 | + |
| AAEL006789 | tbp-associated factor                             | y | 4299 | maker     | CDS                      | 152272 | 152434 | + |
| AAEL006789 | tbp-associated factor                             | y | 4299 | maker     | CDS                      | 152493 | 153118 | + |
| AAEL006789 | tbp-associated factor                             | y | 4299 | maker     | three_prime_UTR          | 153119 | 153228 | + |
| AAEL006789 | tbp-associated factor                             | y | 1193 | maker     | gene                     | 192590 | 193668 | + |

|            |                                |   |       |       |                 |        |        |   |
|------------|--------------------------------|---|-------|-------|-----------------|--------|--------|---|
| AAEL006789 | tbp-associated factor          | y | 1193  | maker | mRNA            | 192590 | 193668 | + |
| AAEL006789 | tbp-associated factor          | y | 1193  | maker | exon            | 192933 | 193668 | + |
| AAEL006789 | tbp-associated factor          | y | 1193  | maker | exon            | 192712 | 192874 | + |
| AAEL006789 | tbp-associated factor          | y | 1193  | maker | exon            | 192590 | 192651 | + |
| AAEL006789 | tbp-associated factor          | y | 1193  | maker | five_prime_UTR  | 192590 | 192642 | + |
| AAEL006789 | tbp-associated factor          | y | 1193  | maker | CDS             | 192643 | 192651 | + |
| AAEL006789 | tbp-associated factor          | y | 1193  | maker | CDS             | 192712 | 192874 | + |
| AAEL006789 | tbp-associated factor          | y | 1193  | maker | CDS             | 192933 | 193558 | + |
| AAEL006789 | tbp-associated factor          | y | 1193  | maker | three_prime_UTR | 193559 | 193668 | + |
| AAEL006963 | conserved hypothetical protein | n | 16459 | maker | gene            | 2765   | 9562   | + |
| AAEL006963 | conserved hypothetical protein | n | 16459 | maker | mRNA            | 2765   | 9562   | + |
| AAEL006963 | conserved hypothetical protein | n | 16459 | maker | exon            | 2765   | 3394   | + |
| AAEL006963 | conserved hypothetical protein | n | 16459 | maker | exon            | 3536   | 4562   | + |
| AAEL006963 | conserved hypothetical protein | n | 16459 | maker | exon            | 4624   | 4774   | + |
| AAEL006963 | conserved hypothetical protein | n | 16459 | maker | exon            | 8918   | 9049   | + |
| AAEL006963 | conserved hypothetical protein | n | 16459 | maker | exon            | 9119   | 9562   | + |
| AAEL006963 | conserved hypothetical protein | n | 16459 | maker | five_prime_UTR  | 2765   | 2838   | + |
| AAEL006963 | conserved hypothetical protein | n | 16459 | maker | CDS             | 2839   | 3394   | + |
| AAEL006963 | conserved hypothetical protein | n | 16459 | maker | CDS             | 3536   | 4562   | + |
| AAEL006963 | conserved hypothetical protein | n | 16459 | maker | CDS             | 4624   | 4774   | + |
| AAEL006963 | conserved hypothetical protein | n | 16459 | maker | CDS             | 8918   | 9049   | + |
| AAEL006963 | conserved hypothetical protein | n | 16459 | maker | CDS             | 9119   | 9499   | + |
| AAEL006963 | conserved hypothetical protein | n | 16459 | maker | three_prime_UTR | 9500   | 9562   | + |
| AAEL007070 | lipase                         | n | 1912  | maker | gene            | 125345 | 126507 | - |
| AAEL007070 | lipase                         | n | 1912  | maker | mRNA            | 125345 | 126507 | - |
| AAEL007070 | lipase                         | n | 1912  | maker | exon            | 125345 | 126388 | - |
| AAEL007070 | lipase                         | n | 1912  | maker | exon            | 126451 | 126507 | - |
| AAEL007070 | lipase                         | n | 1912  | maker | five_prime_UTR  | 126500 | 126507 | - |
| AAEL007070 | lipase                         | n | 1912  | maker | CDS             | 126451 | 126499 | - |
| AAEL007070 | lipase                         | n | 1912  | maker | CDS             | 125421 | 126388 | - |
| AAEL007070 | lipase                         | n | 1912  | maker | three_prime_UTR | 125345 | 125420 | - |
| AAEL007157 | hypothetical protein           | n | 841   | maker | gene            | 261329 | 269697 | - |
| AAEL007157 | hypothetical protein           | n | 841   | maker | mRNA            | 261329 | 269697 | - |
| AAEL007157 | hypothetical protein           | n | 841   | maker | exon            | 266572 | 266784 | - |
| AAEL007157 | hypothetical protein           | n | 841   | maker | exon            | 266838 | 267912 | - |
| AAEL007157 | hypothetical protein           | n | 841   | maker | exon            | 269065 | 269168 | - |
| AAEL007157 | hypothetical protein           | n | 841   | maker | exon            | 269194 | 269349 | - |
| AAEL007157 | hypothetical protein           | n | 841   | maker | exon            | 269415 | 269697 | - |
| AAEL007157 | hypothetical protein           | n | 841   | maker | exon            | 261329 | 264088 | - |
| AAEL007157 | hypothetical protein           | n | 841   | maker | exon            | 264148 | 264278 | - |
| AAEL007157 | hypothetical protein           | n | 841   | maker | exon            | 264471 | 264685 | - |
| AAEL007157 | hypothetical protein           | n | 841   | maker | exon            | 264752 | 264999 | - |

|            |                                                         |   |      |           |                          |        |        |   |
|------------|---------------------------------------------------------|---|------|-----------|--------------------------|--------|--------|---|
| AAEL007157 | hypothetical protein                                    | n | 841  | maker     | exon                     | 265067 | 265122 | - |
| AAEL007157 | hypothetical protein                                    | n | 841  | maker     | five_prime_UTR           | 269415 | 269697 | - |
| AAEL007157 | hypothetical protein                                    | n | 841  | maker     | five_prime_UTR           | 269194 | 269349 | - |
| AAEL007157 | hypothetical protein                                    | n | 841  | maker     | five_prime_UTR           | 269152 | 269168 | - |
| AAEL007157 | hypothetical protein                                    | n | 841  | maker     | CDS                      | 269065 | 269151 | - |
| AAEL007157 | hypothetical protein                                    | n | 841  | maker     | CDS                      | 266838 | 267912 | - |
| AAEL007157 | hypothetical protein                                    | n | 841  | maker     | CDS                      | 266572 | 266784 | - |
| AAEL007157 | hypothetical protein                                    | n | 841  | maker     | CDS                      | 265067 | 265122 | - |
| AAEL007157 | hypothetical protein                                    | n | 841  | maker     | CDS                      | 264752 | 264999 | - |
| AAEL007157 | hypothetical protein                                    | n | 841  | maker     | CDS                      | 264471 | 264685 | - |
| AAEL007157 | hypothetical protein                                    | n | 841  | maker     | CDS                      | 264148 | 264278 | - |
| AAEL007157 | hypothetical protein                                    | n | 841  | maker     | CDS                      | 261650 | 264088 | - |
| AAEL007157 | hypothetical protein                                    | n | 841  | maker     | three_prime_UTR          | 261329 | 261649 | - |
| AAEL007216 | elongase, putative                                      | y | 5347 | exonerate | expressed_sequence_match | 9291   | 51733  | + |
| AAEL007216 | elongase, putative                                      | y | 5347 | exonerate | match_part               | 9291   | 9437   | + |
| AAEL007216 | elongase, putative                                      | y | 5347 | exonerate | match_part               | 28806  | 28973  | + |
| AAEL007216 | elongase, putative                                      | y | 5347 | exonerate | match_part               | 30117  | 30173  | + |
| AAEL007216 | elongase, putative                                      | y | 5347 | exonerate | match_part               | 36168  | 36273  | + |
| AAEL007216 | elongase, putative                                      | y | 5347 | exonerate | match_part               | 38939  | 39075  | + |
| AAEL007216 | elongase, putative                                      | y | 5347 | exonerate | match_part               | 39160  | 39312  | + |
| AAEL007216 | elongase, putative                                      | y | 5347 | exonerate | match_part               | 50665  | 51733  | + |
| AAEL007216 | elongase, putative                                      | y | 5365 | maker     | gene                     | 8897   | 23334  | - |
| AAEL007216 | elongase, putative                                      | y | 5365 | maker     | mRNA                     | 8897   | 23334  | - |
| AAEL007216 | elongase, putative                                      | y | 5365 | maker     | exon                     | 8897   | 9003   | - |
| AAEL007216 | elongase, putative                                      | y | 5365 | maker     | exon                     | 23155  | 23334  | - |
| AAEL007216 | elongase, putative                                      | y | 5365 | maker     | five_prime_UTR           | 23318  | 23334  | - |
| AAEL007216 | elongase, putative                                      | y | 5365 | maker     | CDS                      | 23155  | 23317  | - |
| AAEL007216 | elongase, putative                                      | y | 5365 | maker     | CDS                      | 8897   | 9003   | - |
| AAEL007360 | lethal(3)malignant brain tumor                          | n | 1024 | maker     | gene                     | 208474 | 219411 | + |
| AAEL007360 | lethal(3)malignant brain tumor                          | n | 1024 | maker     | mRNA                     | 208474 | 219411 | + |
| AAEL007360 | lethal(3)malignant brain tumor                          | n | 1024 | maker     | exon                     | 208474 | 209629 | + |
| AAEL007360 | lethal(3)malignant brain tumor                          | n | 1024 | maker     | exon                     | 219142 | 219411 | + |
| AAEL007360 | lethal(3)malignant brain tumor                          | n | 1024 | maker     | five_prime_UTR           | 208474 | 208966 | + |
| AAEL007360 | lethal(3)malignant brain tumor                          | n | 1024 | maker     | CDS                      | 208967 | 209629 | + |
| AAEL007360 | lethal(3)malignant brain tumor                          | n | 1024 | maker     | CDS                      | 219142 | 219411 | + |
| AAEL007397 | Ecdysone-induced protein 75B isoform A Nuclear receptor | n | 564  | maker     | gene                     | 255473 | 266306 | - |
| AAEL007397 | Ecdysone-induced protein 75B isoform A Nuclear receptor | n | 564  | maker     | mRNA                     | 255473 | 266306 | - |
| AAEL007397 | Ecdysone-induced protein 75B isoform A Nuclear receptor | n | 564  | maker     | exon                     | 255473 | 258268 | - |

|            |                                                            |   |       |       |                 |        |        |   |
|------------|------------------------------------------------------------|---|-------|-------|-----------------|--------|--------|---|
| AAEL007397 | Ecdysone-induced protein 75B isoform A<br>Nuclear receptor | n | 564   | maker | exon            | 262455 | 262690 | - |
| AAEL007397 | Ecdysone-induced protein 75B isoform A<br>Nuclear receptor | n | 564   | maker | exon            | 265294 | 266306 | - |
| AAEL007397 | Ecdysone-induced protein 75B isoform A<br>Nuclear receptor | n | 564   | maker | five_prime_UTR  | 265358 | 266306 | - |
| AAEL007397 | Ecdysone-induced protein 75B isoform A<br>Nuclear receptor | n | 564   | maker | CDS             | 265294 | 265357 | - |
| AAEL007397 | Ecdysone-induced protein 75B isoform A<br>Nuclear receptor | n | 564   | maker | CDS             | 262455 | 262690 | - |
| AAEL007397 | Ecdysone-induced protein 75B isoform A<br>Nuclear receptor | n | 564   | maker | CDS             | 256091 | 258268 | - |
| AAEL007397 | Ecdysone-induced protein 75B isoform A<br>Nuclear receptor | n | 564   | maker | three_prime_UTR | 255473 | 256090 | - |
| AAEL007466 | putative                                                   | n | 10142 | maker | gene            | 39686  | 40528  | + |
| AAEL007466 | putative                                                   | n | 10142 | maker | mRNA            | 39686  | 40528  | + |
| AAEL007466 | putative                                                   | n | 10142 | maker | exon            | 39686  | 39934  | + |
| AAEL007466 | putative                                                   | n | 10142 | maker | exon            | 39994  | 40528  | + |
| AAEL007466 | putative                                                   | n | 10142 | maker | five_prime_UTR  | 39686  | 39817  | + |
| AAEL007466 | putative                                                   | n | 10142 | maker | CDS             | 39818  | 39934  | + |
| AAEL007466 | putative                                                   | n | 10142 | maker | CDS             | 39994  | 40428  | + |
| AAEL007466 | putative                                                   | n | 10142 | maker | three_prime_UTR | 40429  | 40528  | + |
| AAEL007558 | helicase                                                   | n | 7232  | maker | gene            | 81182  | 88788  | - |
| AAEL007558 | helicase                                                   | n | 7232  | maker | mRNA            | 81182  | 88788  | - |
| AAEL007558 | helicase                                                   | n | 7232  | maker | exon            | 81182  | 81687  | - |
| AAEL007558 | helicase                                                   | n | 7232  | maker | exon            | 81751  | 81934  | - |
| AAEL007558 | helicase                                                   | n | 7232  | maker | exon            | 81998  | 82312  | - |
| AAEL007558 | helicase                                                   | n | 7232  | maker | exon            | 82376  | 82523  | - |
| AAEL007558 | helicase                                                   | n | 7232  | maker | exon            | 85624  | 85781  | - |
| AAEL007558 | helicase                                                   | n | 7232  | maker | exon            | 85844  | 85984  | - |
| AAEL007558 | helicase                                                   | n | 7232  | maker | exon            | 86050  | 87557  | - |
| AAEL007558 | helicase                                                   | n | 7232  | maker | exon            | 88323  | 88788  | - |
| AAEL007558 | helicase                                                   | n | 7232  | maker | five_prime_UTR  | 88387  | 88788  | - |
| AAEL007558 | helicase                                                   | n | 7232  | maker | CDS             | 88323  | 88386  | - |
| AAEL007558 | helicase                                                   | n | 7232  | maker | CDS             | 86050  | 87557  | - |
| AAEL007558 | helicase                                                   | n | 7232  | maker | CDS             | 85844  | 85984  | - |
| AAEL007558 | helicase                                                   | n | 7232  | maker | CDS             | 85624  | 85781  | - |
| AAEL007558 | helicase                                                   | n | 7232  | maker | CDS             | 82376  | 82523  | - |
| AAEL007558 | helicase                                                   | n | 7232  | maker | CDS             | 81998  | 82312  | - |
| AAEL007558 | helicase                                                   | n | 7232  | maker | CDS             | 81751  | 81934  | - |
| AAEL007558 | helicase                                                   | n | 7232  | maker | CDS             | 81554  | 81687  | - |
| AAEL007558 | helicase                                                   | n | 7232  | maker | three_prime_UTR | 81182  | 81553  | - |

|            |                                                      |   |       |       |                 |       |       |   |
|------------|------------------------------------------------------|---|-------|-------|-----------------|-------|-------|---|
| AAEL007578 | shk1 kinase-binding protein                          | n | 1206  | maker | gene            | 24246 | 26556 | + |
| AAEL007578 | shk1 kinase-binding protein                          | n | 1206  | maker | mRNA            | 24246 | 26556 | + |
| AAEL007578 | shk1 kinase-binding protein                          | n | 1206  | maker | exon            | 25913 | 26556 | + |
| AAEL007578 | shk1 kinase-binding protein                          | n | 1206  | maker | exon            | 24246 | 25703 | + |
| AAEL007578 | shk1 kinase-binding protein                          | n | 1206  | maker | five_prime_UTR  | 24246 | 24355 | + |
| AAEL007578 | shk1 kinase-binding protein                          | n | 1206  | maker | CDS             | 24356 | 25703 | + |
| AAEL007578 | shk1 kinase-binding protein                          | n | 1206  | maker | CDS             | 25913 | 26445 | + |
| AAEL007578 | shk1 kinase-binding protein                          | n | 1206  | maker | three_prime_UTR | 26446 | 26556 | + |
| AAEL008084 | phosphatidylserine receptor                          | n | 5476  | GLEAN | mRNA            | 21961 | 40766 | - |
| AAEL008084 | phosphatidylserine receptor                          | n | 5476  | GLEAN | CDS             | 40685 | 40766 | - |
| AAEL008084 | phosphatidylserine receptor                          | n | 5476  | GLEAN | CDS             | 40264 | 40622 | - |
| AAEL008084 | phosphatidylserine receptor                          | n | 5476  | GLEAN | CDS             | 39849 | 40199 | - |
| AAEL008084 | phosphatidylserine receptor                          | n | 5476  | GLEAN | CDS             | 22627 | 22815 | - |
| AAEL008084 | phosphatidylserine receptor                          | n | 5476  | GLEAN | CDS             | 22352 | 22564 | - |
| AAEL008084 | phosphatidylserine receptor                          | n | 5476  | GLEAN | UTR_3           | 21961 | 22351 | - |
| AAEL008363 | 12                                                   | n | 2524  | maker | gene            | 36071 | 36932 | - |
| AAEL008363 | 12                                                   | n | 2524  | maker | mRNA            | 36071 | 36932 | - |
| AAEL008363 | 12                                                   | n | 2524  | maker | exon            | 36071 | 36394 | - |
| AAEL008363 | 12                                                   | n | 2524  | maker | exon            | 36495 | 36932 | - |
| AAEL008363 | 12                                                   | n | 2524  | maker | five_prime_UTR  | 36928 | 36932 | - |
| AAEL008363 | 12                                                   | n | 2524  | maker | CDS             | 36495 | 36927 | - |
| AAEL008363 | 12                                                   | n | 2524  | maker | CDS             | 36267 | 36394 | - |
| AAEL008363 | 12                                                   | n | 2524  | maker | three_prime_UTR | 36071 | 36266 | - |
| AAEL008611 | metastasis-associated protein 3 (mta3)               | n | 10859 | GLEAN | mRNA            | 26686 | 45200 | - |
| AAEL008611 | metastasis-associated protein 3 (mta3)               | n | 10859 | GLEAN | CDS             | 45134 | 45200 | - |
| AAEL008611 | metastasis-associated protein 3 (mta3)               | n | 10859 | GLEAN | CDS             | 43685 | 43899 | - |
| AAEL008611 | metastasis-associated protein 3 (mta3)               | n | 10859 | GLEAN | CDS             | 43435 | 43559 | - |
| AAEL008611 | metastasis-associated protein 3 (mta3)               | n | 10859 | GLEAN | CDS             | 42674 | 42926 | - |
| AAEL008611 | metastasis-associated protein 3 (mta3)               | n | 10859 | GLEAN | CDS             | 39379 | 39752 | - |
| AAEL008611 | metastasis-associated protein 3 (mta3)               | n | 10859 | GLEAN | CDS             | 39042 | 39307 | - |
| AAEL008611 | metastasis-associated protein 3 (mta3)               | n | 10859 | GLEAN | CDS             | 38391 | 38987 | - |
| AAEL008611 | metastasis-associated protein 3 (mta3)               | n | 10859 | GLEAN | CDS             | 38196 | 38323 | - |
| AAEL008611 | metastasis-associated protein 3 (mta3)               | n | 10859 | GLEAN | CDS             | 28291 | 28406 | - |
| AAEL008611 | metastasis-associated protein 3 (mta3)               | n | 10859 | GLEAN | CDS             | 27379 | 27808 | - |
| AAEL008611 | metastasis-associated protein 3 (mta3)               | n | 10859 | GLEAN | UTR_3           | 26686 | 27380 | - |
| AAEL008763 | tata-binding protein-associated phosphoprotein (dr1) | n | 11851 | maker | gene            | 19580 | 20459 | + |
| AAEL008763 | tata-binding protein-associated phosphoprotein (dr1) | n | 11851 | maker | mRNA            | 19580 | 20459 | + |
| AAEL008763 | tata-binding protein-associated phosphoprotein (dr1) | n | 11851 | maker | exon            | 19580 | 19830 | + |

|            |                                                      |   |       |       |                 |        |        |   |
|------------|------------------------------------------------------|---|-------|-------|-----------------|--------|--------|---|
| AAEL008763 | tata-binding protein-associated phosphoprotein (dr1) | n | 11851 | maker | exon            | 19905  | 20459  | + |
| AAEL008763 | tata-binding protein-associated phosphoprotein (dr1) | n | 11851 | maker | five_prime_UTR  | 19580  | 19731  | + |
| AAEL008763 | tata-binding protein-associated phosphoprotein (dr1) | n | 11851 | maker | CDS             | 19732  | 19830  | + |
| AAEL008763 | tata-binding protein-associated phosphoprotein (dr1) | n | 11851 | maker | CDS             | 19905  | 20327  | + |
| AAEL008763 | tata-binding protein-associated phosphoprotein (dr1) | n | 11851 | maker | three_prime_UTR | 20328  | 20459  | + |
| AAEL009882 | retinoblastoma-binding protein 4 (rbbp4)             | n | 13    | maker | gene            | 337937 | 339974 | - |
| AAEL009882 | retinoblastoma-binding protein 4 (rbbp4)             | n | 13    | maker | mRNA            | 337937 | 339974 | - |
| AAEL009882 | retinoblastoma-binding protein 4 (rbbp4)             | n | 13    | maker | mRNA            | 337937 | 339917 | - |
| AAEL009882 | retinoblastoma-binding protein 4 (rbbp4)             | n | 13    | maker | exon            | 339635 | 339917 | - |
| AAEL009882 | retinoblastoma-binding protein 4 (rbbp4)             | n | 13    | maker | exon            | 337937 | 339565 | - |
| AAEL009882 | retinoblastoma-binding protein 4 (rbbp4)             | n | 13    | maker | exon            | 339635 | 339797 | - |
| AAEL009882 | retinoblastoma-binding protein 4 (rbbp4)             | n | 13    | maker | exon            | 339933 | 339974 | - |
| AAEL009882 | retinoblastoma-binding protein 4 (rbbp4)             | n | 13    | maker | five_prime_UTR  | 339933 | 339974 | - |
| AAEL009882 | retinoblastoma-binding protein 4 (rbbp4)             | n | 13    | maker | five_prime_UTR  | 339657 | 339797 | - |
| AAEL009882 | retinoblastoma-binding protein 4 (rbbp4)             | n | 13    | maker | CDS             | 339635 | 339656 | - |
| AAEL009882 | retinoblastoma-binding protein 4 (rbbp4)             | n | 13    | maker | CDS             | 338298 | 339565 | - |
| AAEL009882 | retinoblastoma-binding protein 4 (rbbp4)             | n | 13    | maker | three_prime_UTR | 337937 | 338297 | - |
| AAEL009882 | retinoblastoma-binding protein 4 (rbbp4)             | n | 13    | maker | five_prime_UTR  | 339657 | 339917 | - |
| AAEL009882 | retinoblastoma-binding protein 4 (rbbp4)             | n | 13    | maker | CDS             | 339635 | 339656 | - |
| AAEL009882 | retinoblastoma-binding protein 4 (rbbp4)             | n | 13    | maker | CDS             | 338298 | 339565 | - |
| AAEL009882 | retinoblastoma-binding protein 4 (rbbp4)             | n | 13    | maker | three_prime_UTR | 337937 | 338297 | - |
| AAEL010107 | conserved hypothetical protein                       | n | 14    | maker | gene            | 628670 | 630279 | - |
| AAEL010107 | conserved hypothetical protein                       | n | 14    | maker | mRNA            | 628670 | 630279 | - |
| AAEL010107 | conserved hypothetical protein                       | n | 14    | maker | exon            | 628670 | 630024 | - |
| AAEL010107 | conserved hypothetical protein                       | n | 14    | maker | exon            | 630081 | 630279 | - |
| AAEL010107 | conserved hypothetical protein                       | n | 14    | maker | five_prime_UTR  | 630179 | 630279 | - |
| AAEL010107 | conserved hypothetical protein                       | n | 14    | maker | CDS             | 630081 | 630178 | - |
| AAEL010107 | conserved hypothetical protein                       | n | 14    | maker | CDS             | 628824 | 630024 | - |
| AAEL010107 | conserved hypothetical protein                       | n | 14    | maker | three_prime_UTR | 628670 | 628823 | - |
| AAEL010107 | conserved hypothetical protein                       | n | 1264  | maker | gene            | 173279 | 174930 | - |
| AAEL010107 | conserved hypothetical protein                       | n | 1264  | maker | mRNA            | 173279 | 174930 | - |
| AAEL010107 | conserved hypothetical protein                       | n | 1264  | maker | exon            | 173279 | 174635 | - |
| AAEL010107 | conserved hypothetical protein                       | n | 1264  | maker | exon            | 174692 | 174930 | - |
| AAEL010107 | conserved hypothetical protein                       | n | 1264  | maker | five_prime_UTR  | 174790 | 174930 | - |
| AAEL010107 | conserved hypothetical protein                       | n | 1264  | maker | CDS             | 174692 | 174789 | - |
| AAEL010107 | conserved hypothetical protein                       | n | 1264  | maker | CDS             | 173435 | 174635 | - |
| AAEL010107 | conserved hypothetical protein                       | n | 1264  | maker | three_prime_UTR | 173279 | 173434 | - |

|            |                                         |   |      |           |                          |        |        |   |
|------------|-----------------------------------------|---|------|-----------|--------------------------|--------|--------|---|
| AAEL010826 | histone-lysine n-methyltransferase      | n | 8281 | cufflinks | mRNA                     | 36077  | 52601  | + |
| AAEL010826 | histone-lysine n-methyltransferase      | n | 8281 | cufflinks | UTR_5                    | 36077  | 36279  | + |
| AAEL010826 | histone-lysine n-methyltransferase      | n | 8281 | cufflinks | CDS                      | 36280  | 36354  | + |
| AAEL010826 | histone-lysine n-methyltransferase      | n | 8281 | cufflinks | CDS                      | 49386  | 49560  | + |
| AAEL010826 | histone-lysine n-methyltransferase      | n | 8281 | cufflinks | CDS                      | 50281  | 52211  | + |
| AAEL010826 | histone-lysine n-methyltransferase      | n | 8281 | cufflinks | UTR_3                    | 52212  | 52601  | + |
| AAEL010971 | hypothetical protein                    | n | 763  | maker     | gene                     | 5273   | 14032  | - |
| AAEL010971 | hypothetical protein                    | n | 763  | maker     | mRNA                     | 5273   | 14032  | - |
| AAEL010971 | hypothetical protein                    | n | 763  | maker     | exon                     | 5273   | 7490   | - |
| AAEL010971 | hypothetical protein                    | n | 763  | maker     | exon                     | 7560   | 7718   | - |
| AAEL010971 | hypothetical protein                    | n | 763  | maker     | exon                     | 8075   | 14032  | - |
| AAEL010971 | hypothetical protein                    | n | 763  | maker     | CDS(tentative)           | 8075   | 14032  | - |
| AAEL010971 | hypothetical protein                    | n | 763  | maker     | CDS                      | 7560   | 7718   | - |
| AAEL010971 | hypothetical protein                    | n | 763  | maker     | CDS                      | 7035   | 7490   | - |
| AAEL010971 | hypothetical protein                    | n | 763  | maker     | three_prime_UTR          | 5273   | 7034   | - |
| AAEL011117 | histone deacetylase                     | n | 8296 | GLEAN     | mRNA                     | 20297  | 22961  | - |
| AAEL011117 | histone deacetylase                     | n | 8296 | GLEAN     | UTR_5                    | 22150  | 22961  | - |
| AAEL011117 | histone deacetylase                     | n | 8296 | GLEAN     | CDS                      | 21992  | 22149  | - |
| AAEL011117 | histone deacetylase                     | n | 8296 | GLEAN     | CDS                      | 20561  | 21698  | - |
| AAEL011117 | histone deacetylase                     | n | 8296 | GLEAN     | UTR_3                    | 20297  | 20560  | - |
| AAEL011317 | actin                                   | n | 1201 | maker     | gene                     | 136143 | 137849 | - |
| AAEL011317 | actin                                   | n | 1201 | maker     | mRNA                     | 136143 | 137849 | - |
| AAEL011317 | actin                                   | n | 1201 | maker     | exon                     | 136143 | 137024 | - |
| AAEL011317 | actin                                   | n | 1201 | maker     | exon                     | 137098 | 137453 | - |
| AAEL011317 | actin                                   | n | 1201 | maker     | exon                     | 137515 | 137823 | - |
| AAEL011317 | actin                                   | n | 1201 | maker     | five_prime_UTR           | 137714 | 137849 | - |
| AAEL011317 | actin                                   | n | 1201 | maker     | CDS                      | 137515 | 137713 | - |
| AAEL011317 | actin                                   | n | 1201 | maker     | CDS                      | 137098 | 137453 | - |
| AAEL011317 | actin                                   | n | 1201 | maker     | CDS                      | 136311 | 137024 | - |
| AAEL011317 | actin                                   | n | 1201 | maker     | three_prime_UTR          | 136143 | 136310 | - |
| AAEL011371 | Ortholog to vrille in Anopheles gambiae | n | 4973 | exonerate | expressed_sequence_match | 51342  | 68892  | - |
| AAEL011371 | Ortholog to vrille in Anopheles gambiae | n | 4973 | exonerate | match_part               | 68089  | 68892  | - |
| AAEL011371 | Ortholog to vrille in Anopheles gambiae | n | 4973 | exonerate | match_part               | 54168  | 54278  | - |
| AAEL011371 | Ortholog to vrille in Anopheles gambiae | n | 4973 | exonerate | match_part               | 51342  | 54078  | - |
| AAEL011415 | lysine-specific histone demethylase     | n | 1757 | GLEAN     | mRNA                     | 246176 | 265944 | - |
| AAEL011415 | lysine-specific histone demethylase     | n | 1757 | GLEAN     | UTR_5                    | 265643 | 265944 | - |
| AAEL011415 | lysine-specific histone demethylase     | n | 1757 | GLEAN     | CDS                      | 263551 | 265642 | - |
| AAEL011415 | lysine-specific histone demethylase     | n | 1757 | GLEAN     | CDS                      | 246416 | 246840 | - |
| AAEL011415 | lysine-specific histone demethylase     | n | 1757 | GLEAN     | UTR_3                    | 246176 | 246415 | - |
| AAEL011473 | chromatin regulatory protein sir2       | n | 3326 | maker     | gene                     | 104126 | 105519 | - |
| AAEL011473 | chromatin regulatory protein sir2       | n | 3326 | maker     | mRNA                     | 104126 | 105519 | - |

|            |                                   |   |      |           |                          |        |        |   |
|------------|-----------------------------------|---|------|-----------|--------------------------|--------|--------|---|
| AAEL011473 | chromatin regulatory protein sir2 | n | 3326 | maker     | exon                     | 104126 | 104531 | - |
| AAEL011473 | chromatin regulatory protein sir2 | n | 3326 | maker     | exon                     | 104616 | 105284 | - |
| AAEL011473 | chromatin regulatory protein sir2 | n | 3326 | maker     | exon                     | 105345 | 105519 | - |
| AAEL011473 | chromatin regulatory protein sir2 | n | 3326 | maker     | five_prime_UTR           | 105411 | 105519 | - |
| AAEL011473 | chromatin regulatory protein sir2 | n | 3326 | maker     | CDS                      | 105345 | 105410 | - |
| AAEL011473 | chromatin regulatory protein sir2 | n | 3326 | maker     | CDS                      | 104616 | 105284 | - |
| AAEL011473 | chromatin regulatory protein sir2 | n | 3326 | maker     | CDS                      | 104136 | 104531 | - |
| AAEL011473 | chromatin regulatory protein sir2 | n | 3326 | maker     | three_prime_UTR          | 104126 | 104135 | - |
| AAEL011504 | pupal cuticle protein, putative   | n | 2302 | exonerate | expressed_sequence_match | 176019 | 178159 | - |
| AAEL011504 | pupal cuticle protein, putative   | n | 2302 | exonerate | match_part               | 178051 | 178159 | - |
| AAEL011504 | pupal cuticle protein, putative   | n | 2302 | exonerate | match_part               | 177739 | 177882 | - |
| AAEL011504 | pupal cuticle protein, putative   | n | 2302 | exonerate | match_part               | 177476 | 177668 | - |
| AAEL011504 | pupal cuticle protein, putative   | n | 2302 | exonerate | match_part               | 176019 | 177405 | - |
| AAEL011504 | pupal cuticle protein, putative   | n | 849  | exonerate | expressed_sequence_match | 200133 | 202270 | + |
| AAEL011504 | pupal cuticle protein, putative   | n | 849  | exonerate | match_part               | 200133 | 200241 | + |
| AAEL011504 | pupal cuticle protein, putative   | n | 849  | exonerate | match_part               | 200411 | 200554 | + |
| AAEL011504 | pupal cuticle protein, putative   | n | 849  | exonerate | match_part               | 200625 | 200817 | + |
| AAEL011504 | pupal cuticle protein, putative   | n | 849  | exonerate | match_part               | 200888 | 202270 | + |
| AAEL012438 | conserved hypothetical protein    | n | 2292 | maker     | gene                     | 60470  | 61784  | - |
| AAEL012438 | conserved hypothetical protein    | n | 2292 | maker     | mRNA                     | 60470  | 61784  | - |
| AAEL012438 | conserved hypothetical protein    | n | 2292 | maker     | exon                     | 60470  | 60824  | - |
| AAEL012438 | conserved hypothetical protein    | n | 2292 | maker     | exon                     | 60900  | 61765  | - |
| AAEL012438 | conserved hypothetical protein    | n | 2292 | maker     | five_prime_UTR           | 61697  | 61784  | - |
| AAEL012438 | conserved hypothetical protein    | n | 2292 | maker     | CDS                      | 60900  | 61696  | - |
| AAEL012438 | conserved hypothetical protein    | n | 2292 | maker     | CDS                      | 60698  | 60824  | - |
| AAEL012438 | conserved hypothetical protein    | n | 2292 | maker     | three_prime_UTR          | 60470  | 60697  | - |
| AAEL012467 | brain chitinase and chia          | y | 3908 | exonerate | expressed_sequence_match | 32081  | 52694  | + |
| AAEL012467 | brain chitinase and chia          | y | 3908 | exonerate | match_part               | 32081  | 32661  | + |
| AAEL012467 | brain chitinase and chia          | y | 3908 | exonerate | match_part               | 32724  | 32928  | + |
| AAEL012467 | brain chitinase and chia          | y | 3908 | exonerate | match_part               | 43082  | 43533  | + |
| AAEL012467 | brain chitinase and chia          | y | 3908 | exonerate | match_part               | 43597  | 43868  | + |
| AAEL012467 | brain chitinase and chia          | y | 3908 | exonerate | match_part               | 43936  | 44996  | + |
| AAEL012467 | brain chitinase and chia          | y | 3908 | exonerate | match_part               | 45064  | 52694  | + |
| AAEL012467 | brain chitinase and chia          | y | 4862 | maker     | gene                     | 119526 | 129128 | - |
| AAEL012467 | brain chitinase and chia          | y | 4862 | maker     | mRNA                     | 119526 | 129128 | - |
| AAEL012467 | brain chitinase and chia          | y | 4862 | maker     | exon                     | 119526 | 127153 | - |
| AAEL012467 | brain chitinase and chia          | y | 4862 | maker     | exon                     | 127215 | 128258 | - |
| AAEL012467 | brain chitinase and chia          | y | 4862 | maker     | exon                     | 128326 | 128597 | - |
| AAEL012467 | brain chitinase and chia          | y | 4862 | maker     | exon                     | 128660 | 129128 | - |



|            |                                   |   |      |       |                 |        |        |   |
|------------|-----------------------------------|---|------|-------|-----------------|--------|--------|---|
| AAEL012467 | brain chitinase and chia          | y | 4862 | maker | five_prime_UTR  | 128660 | 129128 | - |
| AAEL012467 | brain chitinase and chia          | y | 4862 | maker | five_prime_UTR  | 128326 | 128597 | - |
| AAEL012467 | brain chitinase and chia          | y | 4862 | maker | five_prime_UTR  | 127580 | 128258 | - |
| AAEL012467 | brain chitinase and chia          | y | 4862 | maker | CDS             | 127215 | 127579 | - |
| AAEL012467 | brain chitinase and chia          | y | 4862 | maker | CDS             | 120961 | 127153 | - |
| AAEL012467 | brain chitinase and chia          | y | 4862 | maker | three_prime_UTR | 119526 | 120960 | - |
| AAEL012525 | YEATS domain containing protein 4 | n | 1335 | maker | gene            | 6278   | 10755  | + |
| AAEL012525 | YEATS domain containing protein 4 | n | 1335 | maker | mRNA            | 6278   | 10755  | + |
| AAEL012525 | YEATS domain containing protein 4 | n | 1335 | maker | exon            | 6278   | 6492   | + |
| AAEL012525 | YEATS domain containing protein 4 | n | 1335 | maker | exon            | 6559   | 7039   | + |
| AAEL012525 | YEATS domain containing protein 4 | n | 1335 | maker | exon            | 10449  | 10755  | + |
| AAEL012525 | YEATS domain containing protein 4 | n | 1335 | maker | five_prime_UTR  | 6278   | 6444   | + |
| AAEL012525 | YEATS domain containing protein 4 | n | 1335 | maker | CDS             | 6445   | 6492   | + |
| AAEL012525 | YEATS domain containing protein 4 | n | 1335 | maker | CDS             | 6559   | 7039   | + |
| AAEL012525 | YEATS domain containing protein 4 | n | 1335 | maker | CDS             | 10449  | 10612  | + |
| AAEL012525 | YEATS domain containing protein 4 | n | 1335 | maker | three_prime_UTR | 10613  | 10755  | + |
| AAEL012573 | serine protease, putative         | n | 538  | maker | gene            | 210349 | 223158 | + |
| AAEL012573 | serine protease, putative         | n | 538  | maker | mRNA            | 210349 | 223158 | + |
| AAEL012573 | serine protease, putative         | n | 538  | maker | exon            | 210349 | 210846 | + |
| AAEL012573 | serine protease, putative         | n | 538  | maker | exon            | 222952 | 223158 | + |
| AAEL012573 | serine protease, putative         | n | 538  | maker | five_prime_UTR  | 210349 | 210400 | + |
| AAEL012573 | serine protease, putative         | n | 538  | maker | CDS             | 210401 | 210846 | + |
| AAEL012573 | serine protease, putative         | n | 538  | maker | CDS             | 222952 | 223036 | + |
| AAEL012573 | serine protease, putative         | n | 538  | maker | three_prime_UTR | 223037 | 223158 | + |
| AAEL012607 | fetal alzheimer antigen, falz     | n | 2527 | GLEAN | mRNA            | 68863  | 83866  | + |
| AAEL012607 | fetal alzheimer antigen, falz     | n | 2527 | GLEAN | UTR_5           | 68863  | 68889  | + |
| AAEL012607 | fetal alzheimer antigen, falz     | n | 2527 | GLEAN | CDS             | 68890  | 69076  | + |
| AAEL012607 | fetal alzheimer antigen, falz     | n | 2527 | GLEAN | CDS             | 69160  | 69320  | + |
| AAEL012607 | fetal alzheimer antigen, falz     | n | 2527 | GLEAN | CDS             | 79109  | 79565  | + |
| AAEL012607 | fetal alzheimer antigen, falz     | n | 2527 | GLEAN | CDS             | 79630  | 80255  | + |
| AAEL012607 | fetal alzheimer antigen, falz     | n | 2527 | GLEAN | CDS             | 80316  | 80566  | + |
| AAEL012607 | fetal alzheimer antigen, falz     | n | 2527 | GLEAN | CDS             | 82281  | 82436  | + |
| AAEL012607 | fetal alzheimer antigen, falz     | n | 2527 | GLEAN | CDS             | 82501  | 82668  | + |
| AAEL012607 | fetal alzheimer antigen, falz     | n | 2527 | GLEAN | CDS             | 82746  | 82941  | + |
| AAEL012607 | fetal alzheimer antigen, falz     | n | 2527 | GLEAN | CDS             | 83008  | 83092  | + |
| AAEL012607 | fetal alzheimer antigen, falz     | n | 2527 | GLEAN | CDS             | 83471  | 83709  | + |
| AAEL012607 | fetal alzheimer antigen, falz     | n | 2527 | GLEAN | UTR_3           | 83710  | 83866  | + |
| AAEL012790 | lipase                            | y | 2230 | maker | gene            | 15228  | 16398  | + |
| AAEL012790 | lipase                            | y | 2230 | maker | mRNA            | 15228  | 16398  | + |
| AAEL012790 | lipase                            | y | 2230 | maker | exon            | 16160  | 16398  | + |
| AAEL012790 | lipase                            | y | 2230 | maker | exon            | 15228  | 16043  | + |
| AAEL012790 | lipase                            | y | 2230 | maker | five_prime_UTR  | 15228  | 15235  | + |

|            |                           |   |      |       |                 |        |        |   |
|------------|---------------------------|---|------|-------|-----------------|--------|--------|---|
| AAEL012790 | lipase                    | y | 2230 | maker | CDS             | 15236  | 16043  | + |
| AAEL012790 | lipase                    | y | 2230 | maker | CDS             | 16160  | 16398  | + |
| AAEL012790 | lipase                    | y | 4910 | maker | gene            | 68052  | 69188  | - |
| AAEL012790 | lipase                    | y | 4910 | maker | mRNA            | 68052  | 69188  | - |
| AAEL012790 | lipase                    | y | 4910 | maker | exon            | 68052  | 68290  | - |
| AAEL012790 | lipase                    | y | 4910 | maker | exon            | 68373  | 69188  | - |
| AAEL012790 | lipase                    | y | 4910 | maker | five_prime_UTR  | 69181  | 69188  | - |
| AAEL012790 | lipase                    | y | 4910 | maker | CDS             | 68373  | 69180  | - |
| AAEL012790 | lipase                    | y | 4910 | maker | CDS             | 68052  | 68290  | - |
| AAEL013542 | elongase, putative        | y | 4233 | GLEAN | mRNA            | 142753 | 157581 | - |
| AAEL013542 | elongase, putative        | y | 4233 | GLEAN | CDS             | 157521 | 157581 | - |
| AAEL013542 | elongase, putative        | y | 4233 | GLEAN | CDS             | 143815 | 144005 | - |
| AAEL013542 | elongase, putative        | y | 4233 | GLEAN | CDS             | 143609 | 143746 | - |
| AAEL013542 | elongase, putative        | y | 4233 | GLEAN | CDS             | 143117 | 143536 | - |
| AAEL013542 | elongase, putative        | y | 4233 | GLEAN | UTR_3           | 142753 | 143118 | - |
| AAEL013542 | elongase, putative        | y | 9844 | GLEAN | mRNA            | 40031  | 54605  | + |
| AAEL013542 | elongase, putative        | y | 9844 | GLEAN | UTR_5           | 40031  | 40200  | + |
| AAEL013542 | elongase, putative        | y | 9844 | GLEAN | CDS             | 40201  | 40261  | + |
| AAEL013542 | elongase, putative        | y | 9844 | GLEAN | CDS             | 53137  | 53327  | + |
| AAEL013542 | elongase, putative        | y | 9844 | GLEAN | CDS             | 53394  | 53531  | + |
| AAEL013542 | elongase, putative        | y | 9844 | GLEAN | CDS             | 53600  | 54019  | + |
| AAEL013542 | elongase, putative        | y | 9844 | GLEAN | UTR_3           | 54020  | 54605  | + |
| AAEL013829 | cuticle protein, putative | y | 339  | maker | gene            | 229071 | 232616 | - |
| AAEL013829 | cuticle protein, putative | y | 339  | maker | mRNA            | 229071 | 232616 | - |
| AAEL013829 | cuticle protein, putative | y | 339  | maker | exon            | 229071 | 229745 | - |
| AAEL013829 | cuticle protein, putative | y | 339  | maker | exon            | 232005 | 232121 | - |
| AAEL013829 | cuticle protein, putative | y | 339  | maker | exon            | 232536 | 232616 | - |
| AAEL013829 | cuticle protein, putative | y | 339  | maker | CDS             | 232536 | 232616 | - |
| AAEL013829 | cuticle protein, putative | y | 339  | maker | CDS             | 232005 | 232121 | - |
| AAEL013829 | cuticle protein, putative | y | 339  | maker | CDS             | 229344 | 229745 | - |
| AAEL013829 | cuticle protein, putative | y | 339  | maker | three_prime_UTR | 229071 | 229343 | - |
| AAEL013829 | cuticle protein, putative | y | 5461 | maker | gene            | 41813  | 46225  | + |
| AAEL013829 | cuticle protein, putative | y | 5461 | maker | mRNA            | 41813  | 46225  | + |
| AAEL013829 | cuticle protein, putative | y | 5461 | maker | exon            | 41813  | 41895  | + |
| AAEL013829 | cuticle protein, putative | y | 5461 | maker | exon            | 42304  | 42420  | + |
| AAEL013829 | cuticle protein, putative | y | 5461 | maker | exon            | 45553  | 46225  | + |
| AAEL013829 | cuticle protein, putative | y | 5461 | maker | five_prime_UTR  | 41813  | 41823  | + |
| AAEL013829 | cuticle protein, putative | y | 5461 | maker | CDS             | 41824  | 41895  | + |
| AAEL013829 | cuticle protein, putative | y | 5461 | maker | CDS             | 42304  | 42420  | + |
| AAEL013829 | cuticle protein, putative | y | 5461 | maker | CDS             | 45553  | 45954  | + |
| AAEL013829 | cuticle protein, putative | y | 5461 | maker | three_prime_UTR | 45955  | 46225  | + |
| AAEL014028 | hypothetical protein      | y | 203  | maker | gene            | 497465 | 499475 | + |

|            |                      |   |      |       |                 |        |        |   |
|------------|----------------------|---|------|-------|-----------------|--------|--------|---|
| AAEL014028 | hypothetical protein | y | 203  | maker | mRNA            | 497465 | 499475 | + |
| AAEL014028 | hypothetical protein | y | 203  | maker | exon            | 499201 | 499475 | + |
| AAEL014028 | hypothetical protein | y | 203  | maker | exon            | 498491 | 499142 | + |
| AAEL014028 | hypothetical protein | y | 203  | maker | exon            | 498015 | 498407 | + |
| AAEL014028 | hypothetical protein | y | 203  | maker | exon            | 497465 | 497950 | + |
| AAEL014028 | hypothetical protein | y | 203  | maker | five_prime_UTR  | 497465 | 497468 | + |
| AAEL014028 | hypothetical protein | y | 203  | maker | CDS(tentative)  | 497469 | 497950 | + |
| AAEL014028 | hypothetical protein | y | 203  | maker | CDS             | 498015 | 498407 | + |
| AAEL014028 | hypothetical protein | y | 203  | maker | CDS             | 498491 | 499142 | + |
| AAEL014028 | hypothetical protein | y | 203  | maker | CDS             | 499201 | 499425 | + |
| AAEL014028 | hypothetical protein | y | 203  | maker | three_prime_UTR | 499426 | 499475 | + |
| AAEL014028 | hypothetical protein | y | 1709 | maker | gene            | 153834 | 155834 | - |
| AAEL014028 | hypothetical protein | y | 1709 | maker | mRNA            | 153834 | 155834 | - |
| AAEL014028 | hypothetical protein | y | 1709 | maker | exon            | 153834 | 154108 | - |
| AAEL014028 | hypothetical protein | y | 1709 | maker | exon            | 154168 | 154819 | - |
| AAEL014028 | hypothetical protein | y | 1709 | maker | exon            | 154890 | 155282 | - |
| AAEL014028 | hypothetical protein | y | 1709 | maker | exon            | 155349 | 155834 | - |
| AAEL014028 | hypothetical protein | y | 1709 | maker | five_prime_UTR  | 155831 | 155834 | - |
| AAEL014028 | hypothetical protein | y | 1709 | maker | CDS(tentative)  | 155349 | 155830 | - |
| AAEL014028 | hypothetical protein | y | 1709 | maker | CDS             | 154890 | 155282 | - |
| AAEL014028 | hypothetical protein | y | 1709 | maker | CDS             | 154168 | 154819 | - |
| AAEL014028 | hypothetical protein | y | 1709 | maker | CDS             | 153884 | 154108 | - |
| AAEL014028 | hypothetical protein | y | 1709 | maker | three_prime_UTR | 153834 | 153883 | - |
| AAEL014072 | tip60                | n | 1040 | maker | gene            | 247974 | 257508 | + |
| AAEL014072 | tip60                | n | 1040 | maker | mRNA            | 247974 | 257442 | + |
| AAEL014072 | tip60                | n | 1040 | maker | mRNA            | 247974 | 257508 | + |
| AAEL014072 | tip60                | n | 1040 | maker | exon            | 247974 | 248132 | + |
| AAEL014072 | tip60                | n | 1040 | maker | exon            | 248270 | 248399 | + |
| AAEL014072 | tip60                | n | 1040 | maker | exon            | 248470 | 249285 | + |
| AAEL014072 | tip60                | n | 1040 | maker | exon            | 249355 | 249517 | + |
| AAEL014072 | tip60                | n | 1040 | maker | exon            | 256871 | 257083 | + |
| AAEL014072 | tip60                | n | 1040 | maker | exon            | 257142 | 257442 | + |
| AAEL014072 | tip60                | n | 1040 | maker | exon            | 256871 | 257508 | + |
| AAEL014072 | tip60                | n | 1040 | maker | CDS             | 247974 | 248132 | + |
| AAEL014072 | tip60                | n | 1040 | maker | CDS             | 248270 | 248399 | + |
| AAEL014072 | tip60                | n | 1040 | maker | CDS             | 248470 | 249285 | + |
| AAEL014072 | tip60                | n | 1040 | maker | CDS             | 249355 | 249517 | + |
| AAEL014072 | tip60                | n | 1040 | maker | CDS             | 256871 | 257083 | + |
| AAEL014072 | tip60                | n | 1040 | maker | CDS             | 257142 | 257142 | + |
| AAEL014072 | tip60                | n | 1040 | maker | three_prime_UTR | 257143 | 257442 | + |
| AAEL014072 | tip60                | n | 1040 | maker | CDS             | 247974 | 248132 | + |
| AAEL014072 | tip60                | n | 1040 | maker | CDS             | 248270 | 248399 | + |

|            |                                        |   |       |       |                 |        |        |   |
|------------|----------------------------------------|---|-------|-------|-----------------|--------|--------|---|
| AAEL014072 | tip60                                  | n | 1040  | maker | CDS             | 248470 | 249285 | + |
| AAEL014072 | tip60                                  | n | 1040  | maker | CDS             | 249355 | 249517 | + |
| AAEL014072 | tip60                                  | n | 1040  | maker | CDS             | 256871 | 257087 | + |
| AAEL014072 | tip60                                  | n | 1040  | maker | three_prime_UTR | 257088 | 257508 | + |
| AAEL014190 | elongase, putative                     | n | 1676  | GLEAN | mRNA            | 217881 | 237116 | - |
| AAEL014190 | elongase, putative                     | n | 1676  | GLEAN | UTR_5           | 237031 | 237116 | - |
| AAEL014190 | elongase, putative                     | n | 1676  | GLEAN | CDS             | 236767 | 237030 | - |
| AAEL014190 | elongase, putative                     | n | 1676  | GLEAN | CDS             | 236551 | 236631 | - |
| AAEL014190 | elongase, putative                     | n | 1676  | GLEAN | CDS             | 236316 | 236478 | - |
| AAEL014190 | elongase, putative                     | n | 1676  | GLEAN | CDS             | 218511 | 218647 | - |
| AAEL014190 | elongase, putative                     | n | 1676  | GLEAN | CDS             | 218137 | 218439 | - |
| AAEL014190 | elongase, putative                     | n | 1676  | GLEAN | UTR_3           | 217881 | 218136 | - |
| AAEL014237 | conserved hypothetical protein         | n | 16459 | maker | gene            | 2765   | 9562   | + |
| AAEL014237 | conserved hypothetical protein         | n | 16459 | maker | mRNA            | 2765   | 9562   | + |
| AAEL014237 | conserved hypothetical protein         | n | 16459 | maker | exon            | 2765   | 3394   | + |
| AAEL014237 | conserved hypothetical protein         | n | 16459 | maker | exon            | 3536   | 4562   | + |
| AAEL014237 | conserved hypothetical protein         | n | 16459 | maker | exon            | 4624   | 4774   | + |
| AAEL014237 | conserved hypothetical protein         | n | 16459 | maker | exon            | 8918   | 9049   | + |
| AAEL014237 | conserved hypothetical protein         | n | 16459 | maker | exon            | 9119   | 9562   | + |
| AAEL014237 | conserved hypothetical protein         | n | 16459 | maker | five_prime_UTR  | 2765   | 2838   | + |
| AAEL014237 | conserved hypothetical protein         | n | 16459 | maker | CDS             | 2839   | 3394   | + |
| AAEL014237 | conserved hypothetical protein         | n | 16459 | maker | CDS             | 3536   | 4562   | + |
| AAEL014237 | conserved hypothetical protein         | n | 16459 | maker | CDS             | 4624   | 4774   | + |
| AAEL014237 | conserved hypothetical protein         | n | 16459 | maker | CDS             | 8918   | 9049   | + |
| AAEL014237 | conserved hypothetical protein         | n | 16459 | maker | CDS             | 9119   | 9499   | + |
| AAEL014237 | conserved hypothetical protein         | n | 16459 | maker | three_prime_UTR | 9500   | 9562   | + |
| AAEL014520 | follistatin                            | n | 9640  | GLEAN | mRNA            | 21728  | 30038  | - |
| AAEL014520 | follistatin                            | n | 9640  | GLEAN | CDS             | 29987  | 30038  | - |
| AAEL014520 | follistatin                            | n | 9640  | GLEAN | CDS             | 29502  | 29895  | - |
| AAEL014520 | follistatin                            | n | 9640  | GLEAN | CDS             | 29324  | 29414  | - |
| AAEL014520 | follistatin                            | n | 9640  | GLEAN | CDS             | 28942  | 29264  | - |
| AAEL014520 | follistatin                            | n | 9640  | GLEAN | CDS             | 28691  | 28882  | - |
| AAEL014520 | follistatin                            | n | 9640  | GLEAN | CDS             | 22695  | 23238  | - |
| AAEL014520 | follistatin                            | n | 9640  | GLEAN | UTR_3           | 21728  | 22696  | - |
| AAEL014536 | embryonic ectoderm development protein | n | 56    | maker | gene            | 417201 | 419131 | + |
| AAEL014536 | embryonic ectoderm development protein | n | 56    | maker | mRNA            | 417201 | 419131 | + |
| AAEL014536 | embryonic ectoderm development protein | n | 56    | maker | exon            | 417201 | 417437 | + |
| AAEL014536 | embryonic ectoderm development protein | n | 56    | maker | exon            | 417510 | 417643 | + |
| AAEL014536 | embryonic ectoderm development protein | n | 56    | maker | exon            | 417719 | 417890 | + |
| AAEL014536 | embryonic ectoderm development protein | n | 56    | maker | exon            | 418062 | 419131 | + |
| AAEL014536 | embryonic ectoderm development protein | n | 56    | maker | five_prime_UTR  | 417201 | 417359 | + |
| AAEL014536 | embryonic ectoderm development protein | n | 56    | maker | CDS             | 417360 | 417437 | + |

|            |                                        |   |      |       |                 |        |        |   |
|------------|----------------------------------------|---|------|-------|-----------------|--------|--------|---|
| AAEL014536 | embryonic ectoderm development protein | n | 56   | maker | CDS             | 417510 | 417643 | + |
| AAEL014536 | embryonic ectoderm development protein | n | 56   | maker | CDS             | 417719 | 417890 | + |
| AAEL014536 | embryonic ectoderm development protein | n | 56   | maker | CDS             | 418062 | 418955 | + |
| AAEL014536 | embryonic ectoderm development protein | n | 56   | maker | three_prime_UTR | 418956 | 419131 | + |
| AAEL015043 | hormone receptor hr3                   | y | 1501 | maker | gene            | 12478  | 27265  | - |
| AAEL015043 | hormone receptor hr3                   | y | 1501 | maker | mRNA            | 12478  | 27265  | - |
| AAEL015043 | hormone receptor hr3                   | y | 1501 | maker | mRNA            | 12478  | 27265  | - |
| AAEL015043 | hormone receptor hr3                   | y | 1501 | maker | exon            | 12478  | 13017  | - |
| AAEL015043 | hormone receptor hr3                   | y | 1501 | maker | exon            | 24699  | 24849  | - |
| AAEL015043 | hormone receptor hr3                   | y | 1501 | maker | exon            | 24930  | 25173  | - |
| AAEL015043 | hormone receptor hr3                   | y | 1501 | maker | exon            | 25243  | 25389  | - |
| AAEL015043 | hormone receptor hr3                   | y | 1501 | maker | exon            | 25549  | 25652  | - |
| AAEL015043 | hormone receptor hr3                   | y | 1501 | maker | exon            | 26235  | 26660  | - |
| AAEL015043 | hormone receptor hr3                   | y | 1501 | maker | exon            | 26840  | 27006  | - |
| AAEL015043 | hormone receptor hr3                   | y | 1501 | maker | exon            | 27096  | 27265  | - |
| AAEL015043 | hormone receptor hr3                   | y | 1501 | maker | five_prime_UTR  | 27248  | 27265  | - |
| AAEL015043 | hormone receptor hr3                   | y | 1501 | maker | CDS             | 27096  | 27247  | - |
| AAEL015043 | hormone receptor hr3                   | y | 1501 | maker | CDS             | 26840  | 27006  | - |
| AAEL015043 | hormone receptor hr3                   | y | 1501 | maker | CDS             | 26235  | 26660  | - |
| AAEL015043 | hormone receptor hr3                   | y | 1501 | maker | CDS             | 25549  | 25652  | - |
| AAEL015043 | hormone receptor hr3                   | y | 1501 | maker | CDS             | 25243  | 25389  | - |
| AAEL015043 | hormone receptor hr3                   | y | 1501 | maker | CDS             | 24930  | 25173  | - |
| AAEL015043 | hormone receptor hr3                   | y | 1501 | maker | CDS             | 24699  | 24849  | - |
| AAEL015043 | hormone receptor hr3                   | y | 1501 | maker | CDS             | 12894  | 13017  | - |
| AAEL015043 | hormone receptor hr3                   | y | 1501 | maker | three_prime_UTR | 12478  | 12893  | - |
| AAEL015043 | hormone receptor hr3                   | y | 1501 | maker | five_prime_UTR  | 27248  | 27265  | - |
| AAEL015043 | hormone receptor hr3                   | y | 1501 | maker | CDS             | 27096  | 27247  | - |
| AAEL015043 | hormone receptor hr3                   | y | 1501 | maker | CDS             | 26840  | 27006  | - |
| AAEL015043 | hormone receptor hr3                   | y | 1501 | maker | CDS             | 25549  | 25652  | - |
| AAEL015043 | hormone receptor hr3                   | y | 1501 | maker | CDS             | 25243  | 25389  | - |
| AAEL015043 | hormone receptor hr3                   | y | 1501 | maker | CDS             | 24930  | 25173  | - |
| AAEL015043 | hormone receptor hr3                   | y | 1501 | maker | CDS             | 24699  | 24849  | - |
| AAEL015043 | hormone receptor hr3                   | y | 1501 | maker | CDS             | 12894  | 13017  | - |
| AAEL015043 | hormone receptor hr3                   | y | 1501 | maker | three_prime_UTR | 12478  | 12893  | - |
| AAEL015043 | hormone receptor hr3                   | y | 640  | maker | gene            | 228036 | 242833 | + |
| AAEL015043 | hormone receptor hr3                   | y | 640  | maker | mRNA            | 228036 | 242833 | + |
| AAEL015043 | hormone receptor hr3                   | y | 640  | maker | mRNA            | 228036 | 242833 | + |
| AAEL015043 | hormone receptor hr3                   | y | 640  | maker | exon            | 228036 | 228205 | + |
| AAEL015043 | hormone receptor hr3                   | y | 640  | maker | exon            | 228285 | 228451 | + |
| AAEL015043 | hormone receptor hr3                   | y | 640  | maker | exon            | 228631 | 229059 | + |
| AAEL015043 | hormone receptor hr3                   | y | 640  | maker | exon            | 229649 | 229752 | + |
| AAEL015043 | hormone receptor hr3                   | y | 640  | maker | exon            | 229844 | 229990 | + |

|            |                                               |   |     |       |                 |        |        |   |
|------------|-----------------------------------------------|---|-----|-------|-----------------|--------|--------|---|
| AAEL015043 | hormone receptor hr3                          | y | 640 | maker | exon            | 230060 | 230303 | + |
| AAEL015043 | hormone receptor hr3                          | y | 640 | maker | exon            | 230366 | 230516 | + |
| AAEL015043 | hormone receptor hr3                          | y | 640 | maker | exon            | 242282 | 242833 | + |
| AAEL015043 | hormone receptor hr3                          | y | 640 | maker | five_prime_UTR  | 228036 | 228053 | + |
| AAEL015043 | hormone receptor hr3                          | y | 640 | maker | CDS             | 228054 | 228205 | + |
| AAEL015043 | hormone receptor hr3                          | y | 640 | maker | CDS             | 228285 | 228451 | + |
| AAEL015043 | hormone receptor hr3                          | y | 640 | maker | CDS             | 228631 | 229059 | + |
| AAEL015043 | hormone receptor hr3                          | y | 640 | maker | CDS             | 229649 | 229752 | + |
| AAEL015043 | hormone receptor hr3                          | y | 640 | maker | CDS             | 229844 | 229990 | + |
| AAEL015043 | hormone receptor hr3                          | y | 640 | maker | CDS             | 230060 | 230303 | + |
| AAEL015043 | hormone receptor hr3                          | y | 640 | maker | CDS             | 230366 | 230516 | + |
| AAEL015043 | hormone receptor hr3                          | y | 640 | maker | CDS             | 242282 | 242405 | + |
| AAEL015043 | hormone receptor hr3                          | y | 640 | maker | three_prime_UTR | 242406 | 242833 | + |
| AAEL015043 | hormone receptor hr3                          | y | 640 | maker | five_prime_UTR  | 228036 | 228053 | + |
| AAEL015043 | hormone receptor hr3                          | y | 640 | maker | CDS             | 228054 | 228205 | + |
| AAEL015043 | hormone receptor hr3                          | y | 640 | maker | CDS             | 228285 | 228451 | + |
| AAEL015043 | hormone receptor hr3                          | y | 640 | maker | CDS             | 229649 | 229752 | + |
| AAEL015043 | hormone receptor hr3                          | y | 640 | maker | CDS             | 229844 | 229990 | + |
| AAEL015043 | hormone receptor hr3                          | y | 640 | maker | CDS             | 230060 | 230303 | + |
| AAEL015043 | hormone receptor hr3                          | y | 640 | maker | CDS             | 230366 | 230516 | + |
| AAEL015043 | hormone receptor hr3                          | y | 640 | maker | CDS             | 242282 | 242405 | + |
| AAEL015043 | hormone receptor hr3                          | y | 640 | maker | three_prime_UTR | 242406 | 242833 | + |
| AAEL015592 | structural maintenance of chromosomes<br>smc1 | n | 749 | maker | gene            | 23679  | 27239  | - |
| AAEL015592 | structural maintenance of chromosomes<br>smc1 | n | 749 | maker | mRNA            | 23679  | 27239  | - |
| AAEL015592 | structural maintenance of chromosomes<br>smc1 | n | 749 | maker | exon            | 23679  | 24934  | - |
| AAEL015592 | structural maintenance of chromosomes<br>smc1 | n | 749 | maker | exon            | 24996  | 25738  | - |
| AAEL015592 | structural maintenance of chromosomes<br>smc1 | n | 749 | maker | exon            | 25816  | 27239  | - |
| AAEL015592 | structural maintenance of chromosomes<br>smc1 | n | 749 | maker | five_prime_UTR  | 27210  | 27239  | - |
| AAEL015592 | structural maintenance of chromosomes<br>smc1 | n | 749 | maker | CDS(tentative)  | 25816  | 27209  | - |
| AAEL015592 | structural maintenance of chromosomes<br>smc1 | n | 749 | maker | CDS             | 24996  | 25738  | - |
| AAEL015592 | structural maintenance of chromosomes<br>smc1 | n | 749 | maker | CDS             | 23766  | 24934  | - |
| AAEL015592 | structural maintenance of chromosomes<br>smc1 | n | 749 | maker | three_prime_UTR | 23679  | 23765  | - |
