# Supplementary material
Source: PubMed Central journal article supplement (PMC4640774)
Supplement: pnas.1516410112.sd10.pdf [file pnas.1516410112.sd10.pdf]

Table S4.2. 211 gene models from the *Ae. albopictus* diapause transcriptome that are represented in the gene expansion family.

| Diapause transcriptome reference | Gene description                      | Genomic CDS reference                              |
|----------------------------------|---------------------------------------|----------------------------------------------------|
| AAEL000007                       | conserved hypothetical protein        | CCG009939.1, CCG009945.1, CCG021623.1, CCG024312.1 |
| AAEL000099                       | Clip-Domain Serine Protease family B. | CCG020502.1                                        |
| AAEL000188                       | elongase, putative                    | CCG019579.1                                        |
| AAEL000261                       | hypothetical protein                  | CCG013550.1                                        |
| AAEL000287                       | hypothetical protein                  | CCG013552.1                                        |
| AAEL000292                       | conserved hypothetical protein        | CCG013549.1                                        |
| AAEL000299                       | hypothetical protein                  | CCG013553.1                                        |
| AAEL000336                       | conserved hypothetical protein        | CCG010918.1, CCG010919.1, CCG011892.1, CCG011893.1 |
| AAEL000419                       | conserved hypothetical protein        | CCG002530.1                                        |
| AAEL000420                       | cathepsin o                           | CCG020610.1                                        |
| AAEL000541                       | fasciclin, putative                   | CCG012447.2, CCG016230.1                           |
| AAEL000554                       | fasciclin, putative                   | CCG015006.1, CCG016229.1, CCG022321.1, CCG022322.1 |
| AAEL000636                       | conserved hypothetical protein        | CCG002987.1, CCG013452.1                           |
| AAEL000715                       | zinc finger protein                   | CCG013148.1                                        |
| AAEL000753                       | conserved hypothetical protein        | CCG004957.1                                        |
| AAEL000974                       | zinc finger protein                   | CCG002267.1, CCG007463.1                           |
| AAEL000980                       | hypothetical protein                  | CCG023427.1                                        |
| AAEL001008                       | conserved hypothetical protein        | CCG020143.1                                        |
| AAEL001016                       | zinc finger protein                   | CCG002533.1                                        |
| AAEL001082                       | conserved hypothetical protein        | CCG007565.1, CCG015422.1                           |
| AAEL001111                       | EST aligned to AAEL018173             | CCG015416.1                                        |
| AAEL001121                       | n-acetylgalactosaminyltransferase     | CCG003355.1, CCG015467.1                           |
| AAEL001146                       | n-acetylgalactosaminyltransferase     | CCG015470.1                                        |
| AAEL001151                       | n-acetylgalactosaminyltransferase     | CCG015471.1, CCG018437.1                           |
| AAEL001301                       | conserved hypothetical protein        | CCG003565.1, CCG005976.1                           |
| AAEL001304                       | nuclear hormone receptor ftz-fl beta  | CCG011519.1, CCG012009.1, CCG013278.1              |
| AAEL001307                       | SEC14, putative                       | CCG003566.1, CCG003567.2, CCG005974.1, CCG005975.1 |

|            |                                             |                                                                                                                                                                                                                                                                                                                                                                                                                   |
|------------|---------------------------------------------|-------------------------------------------------------------------------------------------------------------------------------------------------------------------------------------------------------------------------------------------------------------------------------------------------------------------------------------------------------------------------------------------------------------------|
| AAEL001352 | scaffold attachment factor b                | CCG012575.1, CCG013662.1, CCG014764.2, CCG024335.1                                                                                                                                                                                                                                                                                                                                                                |
| AAEL001700 | hypothetical protein                        | CCG003841.1, CCG003844.1, CCG008165.1                                                                                                                                                                                                                                                                                                                                                                             |
| AAEL001738 | MRAS2, putative                             | CCG009607.1, CCG014434.1                                                                                                                                                                                                                                                                                                                                                                                          |
| AAEL001761 | exonuclease                                 | CCG018743.1, CCG019573.1                                                                                                                                                                                                                                                                                                                                                                                          |
| AAEL001901 | MRAS2, putative                             | CCG013548.1                                                                                                                                                                                                                                                                                                                                                                                                       |
| AAEL001916 | eukaryotic translation initiation factor 4e | CCG013960.1, CCG019224.1                                                                                                                                                                                                                                                                                                                                                                                          |
| AAEL001937 | selenium-binding protein                    | CCG003792.1, CCG008461.1                                                                                                                                                                                                                                                                                                                                                                                          |
| AAEL001957 | conserved hypothetical protein              | CCG017541.1                                                                                                                                                                                                                                                                                                                                                                                                       |
| AAEL001981 | protein serine/threonine kinase, putative   | CCG012930.1, CCG012936.1, CCG012937.1, CCG012940.1, CCG013842.1, CCG013844.1, CCG015121.1, CCG015123.1, CCG017533.1, CCG017534.1, CCG017537.1                                                                                                                                                                                                                                                                     |
| AAEL002004 | protein serine/threonine kinase, putative   | CCG012918.1, CCG012919.1, CCG012920.1, CCG012921.1, CCG012923.1, CCG012924.1, CCG012925.1, CCG012926.1, CCG012927.1, CCG012928.1, CCG012929.1, CCG012931.1, CCG012932.1, CCG012933.1, CCG012942.1, CCG013843.1, CCG013847.1, CCG013848.1, CCG015111.1, CCG015112.1, CCG015113.1, CCG015114.1, CCG015115.1, CCG015116.1, CCG015117.1, CCG015118.1, CCG015119.1, CCG015120.1, CCG015122.1, CCG015124.1, CCG017539.1 |
| AAEL002047 | 40S ribosomal protein S10                   | CCG001763.1, CCG020333.1                                                                                                                                                                                                                                                                                                                                                                                          |
| AAEL002151 | conserved hypothetical protein              | CCG003715.1, CCG020606.1                                                                                                                                                                                                                                                                                                                                                                                          |
| AAEL002196 | procathepsin L3, putative                   | CCG004919.1                                                                                                                                                                                                                                                                                                                                                                                                       |
| AAEL002258 | conserved hypothetical protein              | CCG017946.1                                                                                                                                                                                                                                                                                                                                                                                                       |
| AAEL002282 | zinc finger protein                         | CCG027275.1                                                                                                                                                                                                                                                                                                                                                                                                       |
| AAEL002330 | conserved hypothetical protein              | CCG017196.2                                                                                                                                                                                                                                                                                                                                                                                                       |
| AAEL002397 | conserved hypothetical protein              | CCG025651.1                                                                                                                                                                                                                                                                                                                                                                                                       |
| AAEL002444 | zinc finger protein                         | CCG003716.1, CCG020605.1                                                                                                                                                                                                                                                                                                                                                                                          |
| AAEL002514 | hypothetical protein                        | CCG011166.1, CCG011168.2, CCG023137.1, CCG023139.1                                                                                                                                                                                                                                                                                                                                                                |
| AAEL002661 | matrix metalloproteinase                    | CCG024705.1                                                                                                                                                                                                                                                                                                                                                                                                       |

|            |                                                                                                |                                                                                                                                  |
|------------|------------------------------------------------------------------------------------------------|----------------------------------------------------------------------------------------------------------------------------------|
| AAEL002665 | matrix metalloproteinase                                                                       | CCG002176.1, CCG004660.1, CCG006120.1, CCG006121.1, CCG006964.1, CCG007034.1, CCG008266.1, CCG016171.1, CCG016173.1, CCG016174.1 |
| AAEL002672 | matrix metalloproteinase                                                                       | CCG016172.1, CCG016175.1                                                                                                         |
| AAEL002725 | conserved hypothetical protein                                                                 | CCG012503.1                                                                                                                      |
| AAEL002833 | cathepsin 1                                                                                    | CCG001031.1, CCG001032.1, CCG001500.1, CCG023928.1, CCG027026.1                                                                  |
| AAEL003030 | hypothetical protein                                                                           | CCG006529.1, CCG017995.1                                                                                                         |
| AAEL003309 | alkaline phosphatase                                                                           | CCG016852.1, CCG022132.1                                                                                                         |
| AAEL003313 | alkaline phosphatase                                                                           | CCG016851.1, CCG022128.1, CCG022131.1, CCG023735.1                                                                               |
| AAEL003427 | 40S ribosomal protein S16                                                                      | CCG000058.1, CCG001848.1, CCG004298.1, CCG010049.1, CCG020780.1                                                                  |
| AAEL003444 | caspase (Short)                                                                                | CCG021236.1                                                                                                                      |
| AAEL003471 | hypothetical protein                                                                           | CCG009385.1, CCG025115.1                                                                                                         |
| AAEL003484 | hypothetical protein                                                                           | CCG009384.1, CCG025116.1                                                                                                         |
| AAEL003614 | Clip-Domain Serine Protease family B.                                                          | CCG009844.1, CCG009845.1, CCG013180.1, CCG013181.1                                                                               |
| AAEL003625 | Clip-Domain Serine Protease family B.                                                          | CCG002695.1, CCG009843.1, CCG009846.1, CCG013179.1, CCG013182.1, CCG013183.1                                                     |
| AAEL003805 | EST aligned to AAEL018173                                                                      | CCG019437.1                                                                                                                      |
| AAEL003889 | Gram-Negative Binding Protein (GNBP) or Beta-1 3-Glucan Binding Protein (BGBP).                | CCG004745.1                                                                                                                      |
| AAEL003914 | calcium/calmodulin-dependent serine protein kinase membrane-associated guanylate kinase (cask) | CCG008555.1, CCG026561.1                                                                                                         |
| AAEL003953 | map/microtubule affinity-regulating kinase 2,4                                                 | CCG007002.1                                                                                                                      |
| AAEL003976 | conserved hypothetical protein                                                                 | CCG006209.1, CCG006211.1, CCG006686.1, CCG018324.1, CCG018326.1                                                                  |
| AAEL004014 | glucose dehydrogenase                                                                          | CCG020913.1, CCG022052.1                                                                                                         |
| AAEL004107 | nucleoside diphosphate kinase, putative                                                        | CCG007417.1                                                                                                                      |
| AAEL004127 | acyl-coa dehydrogenase                                                                         | CCG007582.1, CCG015332.1                                                                                                         |
| AAEL004137 | acyl-coa dehydrogenase                                                                         | CCG007583.1, CCG015331.1                                                                                                         |

|            |                                         |                                                                                           |
|------------|-----------------------------------------|-------------------------------------------------------------------------------------------|
| AAEL004308 | proteasome subunit alpha type           | CCG006701.1, CCG025336.1                                                                  |
| AAEL004444 | zinc finger protein                     | CCG028408.1                                                                               |
| AAEL004507 | valacyclovir hydrolase                  | CCG005474.1, CCG005475.1, CCG005476.1, CCG018408.1, CCG018409.1, CCG018410.1, CCG018411.1 |
| AAEL004512 | zinc finger protein                     | CCG024129.1, CCG024130.1, CCG025369.1                                                     |
| AAEL004616 | actin                                   | CCG005361.1, CCG013676.1, CCG013677.1                                                     |
| AAEL004643 | mitochondrial ribosomal protein L1      | CCG010003.1                                                                               |
| AAEL004739 | acyl-coa dehydrogenase                  | CCG015290.1, CCG018446.1                                                                  |
| AAEL004946 | conserved hypothetical protein          | CCG011609.1                                                                               |
| AAEL004953 | elongase, putative                      | CCG016196.1, CCG016197.1, CCG016198.1, CCG019580.1, CCG022830.1, CCG022831.1              |
| AAEL004975 | zinc finger protein                     | CCG018724.1, CCG027660.1                                                                  |
| AAEL005006 | cytochrome P450                         | CCG009072.1, CCG017104.1                                                                  |
| AAEL005014 | transient receptor potential channel    | CCG001374.1, CCG025847.1                                                                  |
| AAEL005093 | Clip-Domain Serine Protease family B.   | CCG019963.1                                                                               |
| AAEL005165 | chaperone protein DNAj                  | CCG004951.1                                                                               |
| AAEL005337 | carbonic anhydrase                      | CCG013374.1                                                                               |
| AAEL005512 | speckle-type poz protein                | CCG002168.1, CCG002804.1, CCG018619.1, CCG021147.1, CCG024830.1                           |
| AAEL005575 | transient receptor potential channel 4, | CCG000689.1, CCG025056.1                                                                  |
| AAEL005666 | matrix metalloproteinase                | CCG002163.1, CCG024035.1                                                                  |
| AAEL005732 | acyl-coa dehydrogenase                  | CCG001124.1, CCG006571.1                                                                  |
| AAEL005957 | phospholipase b, plb1                   | CCG000347.1, CCG026147.1                                                                  |
| AAEL005959 | phospholipase b, plb1                   | CCG000349.1, CCG008910.1                                                                  |
| AAEL005961 | actin                                   | CCG020554.1                                                                               |
| AAEL005969 | phospholipase b, plb1                   | CCG000346.1, CCG018048.1                                                                  |
| AAEL006205 | hypothetical protein                    | CCG010228.1, CCG016224.1, CCG017035.1                                                     |
| AAEL006672 | conserved hypothetical protein          | CCG002775.1, CCG006936.2, CCG017081.1                                                     |
| AAEL006694 | hypothetical protein                    | CCG015899.1, CCG015900.1                                                                  |
| AAEL006827 | cytochrome P450                         | CCG005828.1, CCG012577.1, CCG012578.1, CCG012579.1, CCG021012.1, CCG021013.1, CCG021014.1 |

|            |                                                                                 |                                                                                                                                  |
|------------|---------------------------------------------------------------------------------|----------------------------------------------------------------------------------------------------------------------------------|
| AAEL006902 | serine-type endopeptidase,                                                      | CCG011733.1                                                                                                                      |
| AAEL007024 | cytochrome P450                                                                 | CCG004239.3, CCG004240.1, CCG004241.1, CCG004242.1, CCG004243.1, CCG007271.1, CCG012050.1, CCG015755.1, CCG015756.1, CCG015758.1 |
| AAEL007064 | Gram-Negative Binding Protein (GNBP) or Beta-1 3-Glucan Binding Protein (BGBP). | CCG008483.1, CCG008484.1, CCG010818.1, CCG010819.1                                                                               |
| AAEL007194 | pupal cuticle protein, putative                                                 | CCG010766.1                                                                                                                      |
| AAEL007342 | conserved hypothetical protein                                                  | CCG007525.1                                                                                                                      |
| AAEL007344 | conserved hypothetical protein                                                  | CCG004796.1, CCG007526.1                                                                                                         |
| AAEL007349 | conserved hypothetical protein                                                  | CCG011149.1, CCG017066.1                                                                                                         |
| AAEL007383 | secreted ferritin G subunit precursor, putative                                 | CCG011742.1                                                                                                                      |
| AAEL007626 | Gram-Negative Binding Protein (GNBP) or Beta-1 3-Glucan Binding Protein (BGBP). | CCG009067.1                                                                                                                      |
| AAEL007864 | zinc finger protein                                                             | CCG015630.1                                                                                                                      |
| AAEL007967 | conserved hypothetical protein                                                  | CCG007371.2, CCG007372.1, CCG009829.2, CCG009830.1                                                                               |
| AAEL007972 | apolipoprotein D, putative                                                      | CCG004638.1, CCG004639.1, CCG006327.1                                                                                            |
| AAEL007976 | conserved hypothetical protein                                                  | CCG007370.1                                                                                                                      |
| AAEL008156 | conserved hypothetical protein                                                  | CCG000973.1, CCG020236.1                                                                                                         |
| AAEL008157 | conserved hypothetical protein                                                  | CCG001960.1, CCG001961.1, CCG003457.1, CCG019936.1, CCG021591.1, CCG021592.1, CCG021593.1, CCG028358.1, CCG028360.1              |
| AAEL008172 | conserved hypothetical protein                                                  | CCG021595.1                                                                                                                      |
| AAEL008185 | conserved hypothetical protein                                                  | CCG000943.1, CCG013058.1                                                                                                         |
| AAEL008186 | conserved hypothetical protein                                                  | CCG001962.1                                                                                                                      |
| AAEL008252 | n-acetylgalactosaminyltransferase                                               | CCG003357.1, CCG015469.1                                                                                                         |
| AAEL008507 | srpk                                                                            | CCG007520.1, CCG008785.1, CCG019735.1, CCG021138.1                                                                               |
| AAEL008536 | UCR-motif DNA binding protein, putative                                         | CCG014864.1                                                                                                                      |
| AAEL008545 | conserved hypothetical protein                                                  | CCG014862.1                                                                                                                      |
| AAEL008721 | zinc finger protein                                                             | CCG018363.1                                                                                                                      |
| AAEL009043 | conserved hypothetical protein                                                  | CCG006709.1                                                                                                                      |

|            |                                                                                 |                                                                                                                     |
|------------|---------------------------------------------------------------------------------|---------------------------------------------------------------------------------------------------------------------|
| AAEL009176 | Gram-Negative Binding Protein (GNBP) or Beta-1 3-Glucan Binding Protein (BGBP). | CCG028548.1                                                                                                         |
| AAEL009178 | Gram-Negative Binding Protein (GNBP) or Beta-1 3-Glucan Binding Protein (BGBP). | CCG000362.1, CCG000363.1, CCG028546.1, CCG028547.1                                                                  |
| AAEL009266 | c4b-binding protein beta chain                                                  | CCG011993.1, CCG016633.1                                                                                            |
| AAEL009414 | NADH-ubiquinone oxidoreductase 39 kda subunit                                   | CCG006720.1, CCG011605.1, CCG025023.1, CCG027546.2                                                                  |
| AAEL009479 | amino acid transporter                                                          | CCG011256.1                                                                                                         |
| AAEL009499 | conserved hypothetical protein                                                  | CCG012887.1                                                                                                         |
| AAEL009563 | hypothetical protein                                                            | CCG007102.1, CCG012695.1                                                                                            |
| AAEL009567 | apolipoprotein D, putative                                                      | CCG007101.1, CCG011994.1, CCG012694.1, CCG016634.1                                                                  |
| AAEL009569 | apolipoprotein D, putative                                                      | CCG012693.1                                                                                                         |
| AAEL009591 | cytochrome P450                                                                 | CCG012355.1                                                                                                         |
| AAEL009945 | conserved hypothetical protein                                                  | CCG002776.1, CCG005001.1, CCG005003.1, CCG017080.1, CCG021345.1, CCG026653.1, CCG026654.1, CCG026853.1, CCG026855.1 |
| AAEL010157 | microsomal glutathione s-transferase                                            | CCG002774.1, CCG011065.1, CCG013227.1, CCG013228.1, CCG019696.1                                                     |
| AAEL010205 | conserved hypothetical protein                                                  | CCG003404.1, CCG022300.1                                                                                            |
| AAEL010332 | conserved hypothetical protein                                                  | CCG008861.1, CCG010218.1, CCG010219.1, CCG012794.1, CCG012795.1                                                     |
| AAEL010369 | phospholipase b, plb1                                                           | CCG000397.1                                                                                                         |
| AAEL010396 | secreted ferritin G subunit precursor, putative                                 | CCG011744.1, CCG020377.1, CCG023010.1, CCG023072.1, CCG026125.1                                                     |
| AAEL010405 | alkyldihydroxyacetonephosphate synthase                                         | CCG019261.1, CCG019262.1, CCG019263.1, CCG019264.1, CCG019857.1, CCG020407.1, CCG020408.1, CCG020409.1, CCG020410.1 |

|            |                                                            |                                                                                                                                                                                                                                                                                                                                     |
|------------|------------------------------------------------------------|-------------------------------------------------------------------------------------------------------------------------------------------------------------------------------------------------------------------------------------------------------------------------------------------------------------------------------------|
| AAEL010651 | skpl                                                       | CCG000045.1, CCG000046.1, CCG003288.1, CCG010336.1, CCG011554.1, CCG011555.1, CCG012105.1, CCG016155.1, CCG016156.1, CCG017072.1, CCG017073.1, CCG017074.1, CCG017075.1, CCG017076.1, CCG018464.1, CCG019002.1, CCG019003.1, CCG019004.1, CCG022275.1, CCG024464.1, CCG025326.1, CCG025327.1, CCG025328.1, CCG025329.1, CCG025330.1 |
| AAEL010769 | Serine Protease Inhibitor (serpin) likely cleavage at S/A. | CCG011386.1, CCG021962.1                                                                                                                                                                                                                                                                                                            |
| AAEL010894 | carbonic anhydrase II, putative                            | CCG019925.1, CCG019926.1, CCG026510.1, CCG026511.1                                                                                                                                                                                                                                                                                  |
| AAEL010959 | serine collagenase 1 precursor, putative                   | CCG001235.1, CCG002557.1, CCG002558.1, CCG012485.1, CCG016336.1, CCG016337.1, CCG018344.1, CCG020257.1, CCG022198.1                                                                                                                                                                                                                 |
| AAEL011006 | guanylate kinase                                           | CCG003584.1                                                                                                                                                                                                                                                                                                                         |
| AAEL011038 | integrin alpha-ps                                          | CCG026333.1                                                                                                                                                                                                                                                                                                                         |
| AAEL011197 | actin                                                      | CCG020551.1, CCG022346.1                                                                                                                                                                                                                                                                                                            |
| AAEL011444 | pupal cuticle protein, putative                            | CCG028251.1                                                                                                                                                                                                                                                                                                                         |
| AAEL011522 | MRAS2, putative                                            | CCG000079.1, CCG025033.1                                                                                                                                                                                                                                                                                                            |
| AAEL011656 | 40S ribosomal protein S15                                  | CCG014640.1, CCG021952.1                                                                                                                                                                                                                                                                                                            |
| AAEL011815 | poly [ADP-ribose] polymerase                               | CCG001601.1, CCG018433.1                                                                                                                                                                                                                                                                                                            |
| AAEL011868 | conserved hypothetical protein                             | CCG012796.1, CCG012889.1, CCG012891.1                                                                                                                                                                                                                                                                                               |
| AAEL012143 | Caspase (Short).                                           | CCG021664.1                                                                                                                                                                                                                                                                                                                         |
| AAEL012292 | 4-nitrophenylphosphatase                                   | CCG003125.1, CCG003126.1, CCG003127.1, CCG003128.1, CCG004826.1, CCG004827.1, CCG008170.1, CCG022003.2, CCG022004.1, CCG022005.1, CCG022006.1                                                                                                                                                                                       |
| AAEL012341 | lysosomal acid lipase, putative                            | CCG004105.1, CCG004107.1, CCG026108.1                                                                                                                                                                                                                                                                                               |
| AAEL012377 | odorant binding protein OBP55                              | CCG001738.1, CCG009946.1, CCG009948.1, CCG009949.1, CCG021480.1, CCG026944.1, CCG026945.1                                                                                                                                                                                                                                           |
| AAEL012545 | proliferating cell nuclear antigen                         | CCG018931.1, CCG018932.1                                                                                                                                                                                                                                                                                                            |
| AAEL012612 | serine/threonine protein kinase                            | CCG028075.1                                                                                                                                                                                                                                                                                                                         |
| AAEL012839 | conserved hypothetical protein                             | CCG019416.1, CCG026433.1                                                                                                                                                                                                                                                                                                            |

|            |                                                                          |                                                                                                                                                                                                                             |
|------------|--------------------------------------------------------------------------|-----------------------------------------------------------------------------------------------------------------------------------------------------------------------------------------------------------------------------|
| AAEL013001 | conserved hypothetical protein                                           | CCG001286.1, CCG004568.2                                                                                                                                                                                                    |
| AAEL013004 | conserved hypothetical protein                                           | CCG004567.1, CCG009611.1, CCG009612.1                                                                                                                                                                                       |
| AAEL013054 | conserved hypothetical protein                                           | CCG000911.1, CCG000912.1, CCG000913.1, CCG000914.1, CCG000916.1, CCG012625.1                                                                                                                                                |
| AAEL013515 | pupal cuticle protein, putative                                          | CCG012028.1, CCG028246.1                                                                                                                                                                                                    |
| AAEL013517 | pupal cuticle protein 78E, putative                                      | CCG003817.1, CCG012025.1                                                                                                                                                                                                    |
| AAEL013537 | hypothetical protein                                                     | CCG001034.1, CCG002131.1, CCG007150.1                                                                                                                                                                                       |
| AAEL013542 | elongase, putative                                                       | CCG016766.1, CCG028428.1                                                                                                                                                                                                    |
| AAEL013549 | conserved hypothetical protein                                           | CCG022156.1                                                                                                                                                                                                                 |
| AAEL013553 | conserved hypothetical protein                                           | CCG011608.1, CCG012886.1, CCG012893.1, CCG012896.1, CCG022162.1                                                                                                                                                             |
| AAEL013558 | conserved hypothetical protein                                           | CCG022159.1                                                                                                                                                                                                                 |
| AAEL013796 | conserved hypothetical protein                                           | CCG011610.1, CCG011611.2, CCG022158.1                                                                                                                                                                                       |
| AAEL013906 | bone morphogenetic protein 5/7, bmp5/7                                   | CCG007219.1, CCG014656.1, CCG020761.1, CCG020988.1                                                                                                                                                                          |
| AAEL013936 | Serine Protease Inhibitor (serpin) likely cleavage at I/S. Transcript A. | CCG021651.1, CCG021653.1, CCG021654.1                                                                                                                                                                                       |
| AAEL014132 | conserved hypothetical protein                                           | CCG005589.1                                                                                                                                                                                                                 |
| AAEL014138 | Serine Protease Inhibitor (serpin) likely cleavage at S/L.               | CCG011387.1, CCG021961.1                                                                                                                                                                                                    |
| AAEL014141 | Serine Protease Inhibitor (serpin) likely cleavage at S/M.               | CCG001347.1                                                                                                                                                                                                                 |
| AAEL014348 | Caspase (Short).                                                         | CCG003007.1, CCG003008.2, CCG011446.1, CCG027145.1                                                                                                                                                                          |
| AAEL014354 | Clip-Domain Serine Protease family B.                                    | CCG016345.1                                                                                                                                                                                                                 |
| AAEL014398 | conserved hypothetical protein                                           | CCG012894.1, CCG014248.1, CCG014871.1                                                                                                                                                                                       |
| AAEL014401 | EST aligned to AAEL018275                                                | CCG001303.1, CCG006131.1, CCG006576.1, CCG007173.1, CCG009827.1, CCG009828.1, CCG012888.1, CCG014247.1, CCG014254.1, CCG014872.1, CCG015185.1, CCG023853.1, CCG023854.1, CCG023856.1, CCG023857.1, CCG023858.1, CCG023859.1 |
| AAEL014405 | predicted protein                                                        | CCG014253.1, CCG014865.1                                                                                                                                                                                                    |
| AAEL014406 | predicted protein                                                        | CCG006385.2                                                                                                                                                                                                                 |



|            |                                                         |                                                                                                                                                                                                   |
|------------|---------------------------------------------------------|---------------------------------------------------------------------------------------------------------------------------------------------------------------------------------------------------|
| AAEL014407 | B-cell lymphoma/leukaemia 11A extra long form, putative | CCG003717.2, CCG014249.1, CCG014250.1, CCG014251.1, CCG014252.1, CCG014863.1, CCG014866.1, CCG014867.1, CCG014868.1, CCG014869.3, CCG014870.1, CCG020603.1, CCG023855.1, CCG025693.1              |
| AAEL014554 | hypothetical protein                                    | CCG008497.1, CCG008621.1, CCG008624.1, CCG008625.1, CCG026778.1                                                                                                                                   |
| AAEL014640 | Peptidoglycan Recognition Protein (Long)                | CCG019470.1                                                                                                                                                                                       |
| AAEL014658 | caspase-1                                               | CCG009015.1, CCG009405.1, CCG009689.1, CCG009690.1, CCG028387.1                                                                                                                                   |
| AAEL014694 | hypothetical protein                                    | CCG016152.1, CCG021472.1                                                                                                                                                                          |
| AAEL014853 | otoferlin                                               | CCG008118.1, CCG008120.1                                                                                                                                                                          |
| AAEL014864 | conserved hypothetical protein                          | CCG007005.1, CCG014369.1                                                                                                                                                                          |
| AAEL014919 | lipase 1 precursor                                      | CCG005092.1, CCG009145.1, CCG009158.1, CCG009159.1, CCG009161.1, CCG021026.1, CCG021029.1                                                                                                         |
| AAEL014921 | lipase 1 precursor                                      | CCG011021.1, CCG014362.1, CCG021027.1                                                                                                                                                             |
| AAEL014948 | zinc finger protein                                     | CCG003282.1                                                                                                                                                                                       |
| AAEL014958 | galactokinase                                           | CCG025950.1, CCG027652.1                                                                                                                                                                          |
| AAEL015283 | synaptic vesicle protein                                | CCG011399.1, CCG011401.1, CCG017135.1, CCG018285.1, CCG018286.1, CCG019655.1                                                                                                                      |
| AAEL015326 | lipase 1 precursor                                      | CCG009157.1, CCG011850.1, CCG021030.1, CCG025600.1                                                                                                                                                |
| AAEL015331 | conserved hypothetical protein                          | CCG026599.1                                                                                                                                                                                       |
| AAEL015347 | hypothetical protein                                    | CCG004227.1, CCG023128.1                                                                                                                                                                          |
| AAEL015357 | conserved hypothetical protein                          | CCG001504.1, CCG012371.1, CCG013602.1, CCG013730.1, CCG013731.1, CCG013732.1, CCG013733.1, CCG013735.1, CCG013737.1, CCG016319.1, CCG016320.1, CCG016321.1, CCG016825.1, CCG016826.1, CCG016827.1 |
| AAEL015386 | dipeptidyl-peptidase                                    | CCG001851.1, CCG003624.1, CCG019414.1, CCG019415.1, CCG026434.1                                                                                                                                   |
| AAEL015641 | cytochrome P450                                         | CCG000223.1                                                                                                                                                                                       |
| AAEL017056 | Peptidoglycan Recognition Protein (Short)               | CCG009752.1, CCG015907.1, CCG028234.1, CCG028235.1                                                                                                                                                |

|             |                                                                                                    |                                                                                                        |
|-------------|----------------------------------------------------------------------------------------------------|--------------------------------------------------------------------------------------------------------|
| AAEL017113  | Ortholog to a putative nucleolar protein in Ixodes scapularis                                      | CCG002792.1, CCG028653.1                                                                               |
| AAEL017133  | Ortholog to a putative nucleolar protein in Ixodes scapularis                                      | CCG000946.1, CCG000947.1, CCG012814.1, CCG013060.1, CCG013062.1, CCG014157.1, CCG025415.1, CCG027176.1 |
| AAEL017453  | Ortholog to acyl-coa dehydrogenase in Culex quinquefasciatus                                       | CCG015291.1, CCG018445.1                                                                               |
| AGAP000759  | 39S ribosomal protein L32, mitochondrial                                                           | CCG008708.1, CCG012763.1, CCG013296.1                                                                  |
| AGAP004581  | Heat shock protein 70kDa                                                                           | CCG014478.2, CCG014481.1                                                                               |
| AGAP004862  | Ortholog to misfire in Drosophila melanogaster                                                     | CCG004777.1, CCG028629.1                                                                               |
| AGAP004944  | heat shock 70kDa protein 1/8                                                                       | CCG007707.1, CCG014479.1, CCG022856.1                                                                  |
| AGAP009759  | cuticular protein CPLCP12                                                                          | CCG016691.1                                                                                            |
| AGAP028200  | cuticular protein (putative) CPLCP9                                                                | CCG020546.1                                                                                            |
| CPIJ002557  | conserved hypothetical protein                                                                     | CCG015706.1, CCG022740.1                                                                               |
| CPIJ009109  | conserved hypothetical protein                                                                     | CCG014030.1, CCG014601.1                                                                               |
| CPIJ011632  | predicted protein                                                                                  | CCG006881.1, CCG019600.2                                                                               |
| CPIJ018057  | conserved hypothetical protein                                                                     | CCG008951.2, CCG014398.1                                                                               |
| FBgn0037517 | No annotation yet, but single-copy ortholog in all but one sequenced Drosophila species in FlyBase | CCG003456.1                                                                                            |
