# Supplementary material
Source: PubMed Central journal article supplement (PMC4640774)
Supplement: pnas.1516410112.sd12.pdf [file pnas.1516410112.sd12.pdf]

Table S5-1. Genome coordinates of the *Ae. albopictus* CYP gene family

| Scaffold | Start  | End    | Strand | ID*             | CYP name (D. Nelson, Univ. Tennessee) | Protein length (AA) | CYP clade (CYP family)** | Best tBLASTn-hit*** |
|----------|--------|--------|--------|-----------------|---------------------------------------|---------------------|--------------------------|---------------------|
| 64       | 29281  | 30829  | -      | AalbCYP130      | CYP325L1v1                            | 492                 | CYP4 clade (CYP325)      |                     |
| 64       | 41242  | 43523  | -      | AalbCYP131      | CYP325M5v1                            | 502                 | CYP4 clade (CYP325)      |                     |
| 64       | 53032  | 54901  | -      | AalbCYP132      | CYP325M4v1                            | 498                 | CYP4 clade (CYP325)      |                     |
| 64       | 85440  | 85613  | -      | CYP fragment    |                                       |                     |                          | CYP325M4            |
| 64       | 98760  | 118627 | +      | AalbCYP133      | CYP325M1                              | 500                 | CYP4 clade (CYP325)      |                     |
| 64       | 137578 | 150729 | +      | AalbCYP134      | CYP325N4                              | 507                 | CYP4 clade (CYP325)      |                     |
| 64       | 191222 | 203156 | +      | AalbCYP135      | CYP325N1                              | 506                 | CYP4 clade (CYP325)      |                     |
| 64       | 208500 | 210192 | +      | AalbCYP136      | CYP325G5                              | 500                 | CYP4 clade (CYP325)      |                     |
| 64       | 229845 | 231520 | +      | AalbCYP137      | CYP325G6                              | 499                 | CYP4 clade (CYP325)      |                     |
| 64       | 246540 | 261202 | -      | AalbCYP138      | CYP325T2v1                            | 498                 | CYP4 clade (CYP325)      |                     |
| 64       | 268677 | 270437 | -      | AalbCYP139      | CYP325M6v1                            | 499                 | CYP4 clade (CYP325)      |                     |
| 64       | 284686 | 286456 | -      | AalbCYP140      | CYP325M3v1                            | 500                 | CYP4 clade (CYP325)      |                     |
| 64       | 315853 | 317614 | -      | AalbCYP141      | CYP325M7v1                            | 498                 | CYP4 clade (CYP325)      |                     |
| 64       | 333606 | 335364 | -      | AalbCYP142      | CYP325M8v1                            | 503                 | CYP4 clade (CYP325)      |                     |
| 64       | 416899 | 417218 | -      | CYP fragment    |                                       |                     |                          | CYP9J15             |
| 74       | 153945 | 155474 | +      | AalbCYP158      | CYP6AL1v1                             | 509                 | CYP3 clade (CYP6)        |                     |
| 106      | 198341 | 199870 | +      | AalbCYP006      | CYP6AL1v2                             | 509                 | CYP3 clade (CYP6)        |                     |
| 130      | 373503 | 375365 | -      | AalbCYP015      | CYP325M7v2                            | 499                 | CYP4 clade (CYP325)      |                     |
| 130      | 391555 | 393298 | -      | AalbCYPpseudo05 | CYP325M8Pv2                           | 498                 | CYP4 clade (CYP325)      |                     |
| 130      | 399899 | 425007 | -      | AalbCYP016      | CYP325BQ1                             | 502                 | CYP4 clade (CYP325)      |                     |
| 130      | 434087 | 435768 | -      | AalbCYP017      | CYP325G2                              | 498                 | CYP4 clade (CYP325)      |                     |
| 162      | 216438 | 218337 | +      | AalbCYP034      | CYP9J57                               | 531                 | CYP3 clade (CYP9)        |                     |
| 162      | 221818 | 223475 | +      | AalbCYP035      | CYP9J58                               | 531                 | CYP3 clade (CYP9)        |                     |
| 162      | 226202 | 227945 | +      | AalbCYP036      | CYP9J6                                | 531                 | CYP3 clade (CYP9)        |                     |
| 177      | 394259 | 401564 | +      | AalbCYP043      | CYP325Q2v1                            | 486                 | CYP4 clade (CYP325)      |                     |
| 177      | 410897 | 420623 | +      | AalbCYP044      | CYP325Q5v1                            | 496                 | CYP4 clade (CYP325)      |                     |
| 177      | 423370 | 430674 | +      | AalbCYP045      | CYP325Q4v1                            | 496                 | CYP4 clade (CYP325)      |                     |
| 177      | 433255 | 442306 | -      | AalbCYP046      | CYP325Q3v1                            | 495                 | CYP4 clade (CYP325)      |                     |
| 177      | 462411 | 464212 | +      | AalbCYP047      | CYP325Q1v1                            | 497                 | CYP4 clade (CYP325)      |                     |
| 211      | 100365 | 105171 | +      | AalbCYP051      | CYP4G35v2                             | 554                 | CYP4 clade (CYP4)        |                     |
| 242      | 5404   | 6988   | -      | AalbCYP052      | CYP6F3v1                              | 505                 | CYP3 clade (CYP6)        |                     |
| 242      | 13540  | 15127  | -      | AalbCYP053      | CYP6F2v1                              | 505                 | CYP3 clade (CYP6)        |                     |
| 253      | 5679   | 7583   | +      | AalbCYP056      | CYP9M6v1                              | 533                 | CYP3 clade (CYP9)        |                     |
| 270      | 30470  | 35111  | +      | CYP fragment    |                                       |                     |                          | CYP325P1            |
| 270      | 444640 | 472095 | -      | AalbCYP057      | CYP325E3v1                            | 519                 | CYP4 clade (CYP325)      |                     |
| 270      | 500249 | 512430 | +      | AalbCYP058      | CYP325V1                              | 500                 | CYP4 clade (CYP325)      |                     |
| 270      | 521926 | 523729 | +      | CYP fragment    |                                       |                     |                          | CYP325T1            |
| 272      | 499649 | 500295 | -      | CYP fragment    |                                       |                     |                          | CYP9J30             |
| 272      | 511450 | 513107 | -      | AalbCYPpseudo09 | CYP9J59P                              | 527                 | CYP3 clade (CYP9)        |                     |
| 284      | 400267 | 401898 | -      | AalbCYP061      | CYP4H32v2                             | 502                 | CYP4 clade (CYP4)        |                     |
| 284      | 474794 | 493598 | -      | AalbCYPpseudo11 | CYP4D23Pv2                            | 488                 | CYP4 clade (CYP4)        |                     |
| 318      | 369911 | 382174 | +      | CYP fragment    |                                       |                     |                          | CYP325K3            |
| 318      | 396128 | 397877 | -      | CYP fragment    |                                       |                     |                          | CYP325K2            |
| 421      | 381215 | 403448 | +      | AalbCYP086      | CYP4J17                               | 505                 | CYP4 clade (CYP4)        |                     |
| 460      | 243976 | 255805 | -      | AalbCYP100      | CYP305A5                              | 497                 | CYP2 clade               |                     |
| 460      | 271064 | 284065 | -      | AalbCYP101      | CYP305A6                              | 499                 | CYP2 clade               |                     |
| 460      | 285123 | 302420 | +      | AalbCYP102      | CYP15B1                               | 492                 | CYP2 clade               |                     |
| 501      | 134614 | 136316 | -      | AalbCYP105      | CYP6N9v1                              | 499                 | CYP3 clade (CYP6)        |                     |
| 501      | 143478 | 145063 | +      | AalbCYP106      | CYP6N15v1                             | 497                 | CYP3 clade (CYP6)        |                     |
| 501      | 149948 | 151574 | -      | AalbCYP107      | CYP6N14v1                             | 522                 | CYP3 clade (CYP6)        |                     |
| 501      | 156718 | 158279 | -      | AalbCYP108      | CYP6N13v1                             | 499                 | CYP3 clade (CYP6)        |                     |
| 501      | 158256 | 160258 | -      | AalbCYP109      | CYP6S3v2                              | 512                 | CYP3 clade (CYP6)        |                     |
| 501      | 173675 | 175633 | -      | AalbCYP110      | CYP6N4                                | 498                 | CYP3 clade (CYP6)        |                     |
| 501      | 188218 | 190061 | -      | AalbCYP111      | CYP6N3                                | 497                 | CYP3 clade (CYP6)        |                     |
| 501      | 203973 | 205541 | -      | AalbCYP112      | CYP6N11                               | 501                 | CYP3 clade (CYP6)        |                     |
| 501      | 218420 | 220263 | +      | AalbCYP113      | CYP6N10                               | 497                 | CYP3 clade (CYP6)        |                     |
| 501      | 231151 | 232888 | -      | AalbCYP114      | CYP6Y3                                | 503                 | CYP3 clade (CYP6)        |                     |
| 501      | 243695 | 245733 | -      | AalbCYP115      | CYP6M6                                | 492                 | CYP3 clade (CYP6)        |                     |
| 501      | 259674 | 261397 | +      | AalbCYP116      | CYP6M9                                | 493                 | CYP3 clade (CYP6)        |                     |
| 501      | 270699 | 272928 | +      | AalbCYP117      | CYP6M11v1                             | 499                 | CYP3 clade (CYP6)        |                     |
| 582      | 290508 | 292535 | -      | AalbCYP126      | CYP12F5v1                             | 526                 | Mitochondrial CYP clade  |                     |
| 582      | 308164 | 310163 | +      | AalbCYPpseudo24 | CYP12F6Pv1                            | 549                 | Mitochondrial CYP clade  |                     |
| 582      | 317602 | 332841 | -      | AalbCYP128      | CYP12F7v1                             | 524                 | Mitochondrial CYP clade  |                     |
| 677      | 287171 | 288439 | -      | CYP fragment    |                                       |                     |                          | CYP9J               |
| 741      | 252470 | 254057 | +      | AalbCYP159      | CYP6F2v2                              | 505                 | CYP3 clade (CYP6)        |                     |
| 741      | 254874 | 256474 | -      | AalbCYP160      | CYP6F3v2                              | 508                 | CYP3 clade (CYP6)        |                     |
| 741      | 274664 | 276166 | -      | AalbCYP161      | CYP6CA1                               | 500                 | CYP3 clade (CYP6)        |                     |
| 907      | 267821 | 275695 | +      | CYP fragment    |                                       |                     |                          | CYP4H29             |
| 924      | 235409 | 237107 | +      | AalbCYP175      | CYP4J13                               | 507                 | CYP4 clade (CYP4)        |                     |
| 924      | 237329 | 239050 | +      | AalbCYP176      | CYP4J15                               | 511                 | CYP4 clade (CYP4)        |                     |
| 924      | 256327 | 258037 | +      | AalbCYPpseudo18 | CYP4J14P                              | 506                 | CYP4 clade (CYP4)        |                     |
| 924      | 263255 | 264768 | +      | CYP fragment    |                                       |                     |                          | CYP4J16             |
| 924      | 279304 | 280895 | +      | CYP fragment    |                                       |                     |                          | CYP4J16             |
| 935      | 5758   | 7451   | -      | AalbCYP177      | CYP9J8v1                              | 541                 | CYP3 clade (CYP9)        |                     |
| 935      | 18942  | 20679  | -      | AalbCYPpseudo20 | CYP9J19Pv1                            | 542                 | CYP3 clade (CYP9)        |                     |
| 935      | 20836  | 22551  | -      | AalbCYP178      | CYP9J18v1                             | 546                 | CYP3 clade (CYP9)        |                     |
| 935      | 22744  | 24438  | -      | AalbCYP179      | CYP9J10v1                             | 541                 | CYP3 clade (CYP9)        |                     |
| 935      | 33547  | 35567  | -      | AalbCYP180      | CYP9J9v1                              | 542                 | CYP3 clade (CYP9)        |                     |
| 935      | 53795  | 55467  | -      | AalbCYP181      | CYP9J17v1                             | 538                 | CYP3 clade (CYP9)        |                     |
| 935      | 89590  | 91140  | -      | AalbCYPpseudo19 | CYP9J2Pv1                             | 497                 | CYP3 clade (CYP9)        |                     |
| 935      | 97072  | 98751  | -      | AalbCYP182      | CYP9J16v1                             | 538                 | CYP3 clade (CYP9)        |                     |
| 935      | 106187 | 119580 | -      | AalbCYP183      | CYP9J15v1                             | 541                 | CYP3 clade (CYP9)        |                     |
| 976      | 113488 | 115288 | -      | AalbCYP184      | CYP325Q1v2                            | 497                 | CYP4 clade (CYP325)      |                     |
| 976      | 136457 | 141685 | +      | AalbCYP185      | CYP325Q3v2                            | 495                 | CYP4 clade (CYP325)      |                     |
| 976      | 148674 | 157187 | -      | AalbCYP186      | CYP325Q4v2                            | 496                 | CYP4 clade (CYP325)      |                     |

|      |        |        |   |                 |             |     |                         |          |
|------|--------|--------|---|-----------------|-------------|-----|-------------------------|----------|
| 976  | 167851 | 176015 | - | AalbCYPpseudo22 | CYP325Q5Pv2 | 495 | CYP4 clade (CYP325)     |          |
| 976  | 185371 | 201236 | + | AalbCYP187      | CYP325Q2v2  | 493 | CYP4 clade (CYP325)     |          |
| 1040 | 296563 | 298493 | - | AalbCYPpseudo02 | CYP6N9Pv2   | 493 | CYP3 clade (CYP6)       |          |
| 1040 | 307920 | 309469 | + | AalbCYP002      | CYP6N15v2   | 497 | CYP3 clade (CYP6)       |          |
| 1040 | 313699 | 315325 | - | AalbCYP003      | CYP6N14v2   | 522 | CYP3 clade (CYP6)       |          |
| 1040 | 324583 | 326396 | - | AalbCYPpseudo01 | CYP6N13Pv2  | 499 | CYP3 clade (CYP6)       |          |
| 1040 | 325684 | 328375 | - | AalbCYP004      | CYP6S3v1    | 493 | CYP3 clade (CYP6)       |          |
| 1040 | 340812 | 341371 | - | CYP fragment    |             |     |                         | CYP6N    |
| 1076 | 172196 | 173775 | - | AalbCYP007      | CYP6CB1v1   | 504 | CYP3 clade (CYP6)       |          |
| 1076 | 188930 | 190557 | + | AalbCYPpseudo03 | CYP6CB3P    | 521 | CYP3 clade (CYP6)       |          |
| 1118 | 107221 | 108948 | + | CYP fragment    |             |     |                         | CYP325X4 |
| 1143 | 60203  | 62838  | - | AalbCYP011      | CYP9J32     | 536 | CYP3 clade (CYP9)       |          |
| 1234 | 19170  | 20786  | - | AalbCYP012      | CYP6BY1     | 490 | CYP3 clade (CYP6)       |          |
| 1277 | 3744   | 5432   | + | AalbCYP013      | CYP9M4      | 541 | CYP3 clade (CYP9)       |          |
| 1290 | 14576  | 35537  | + | CYP fragment    |             |     |                         | CYP4D39  |
| 1290 | 45425  | 60434  | - | CYP fragment    |             |     |                         | CYP4D38  |
| 1290 | 78641  | 80328  | - | CYP fragment    |             |     |                         | CYP4D37  |
| 1290 | 131533 | 151250 | + | AalbCYPpseudo04 | CYP4D23Pv1  | 493 | CYP4 clade (CYP4)       |          |
| 1290 | 285520 | 287028 | + | AalbCYP014      | CYP4H32v1   | 502 | CYP4 clade (CYP4)       |          |
| 1307 | 192014 | 194066 | - | AalbCYP018      | CYP6N9v3    | 496 | CYP3 clade (CYP6)       |          |
| 1321 | 234962 | 249095 | + | AalbCYP019      | CYP4H31     | 505 | CYP4 clade (CYP4)       |          |
| 1341 | 44321  | 51536  | - | AalbCYP020.1    | CYP6AG3     | 497 | CYP3 clade (CYP6)       |          |
| 1341 | 44321  | 51536  | - | AalbCYP020.2    | CYP6AG3     | 497 | CYP3 clade (CYP6)       |          |
| 1341 | 58739  | 60500  | - | AalbCYP021      | CYP6AG17    | 497 | CYP3 clade (CYP6)       |          |
| 1341 | 75217  | 77371  | + | AalbCYP022      | CYP6AG7     | 499 | CYP3 clade (CYP6)       |          |
| 1341 | 98049  | 101698 | + | AalbCYP023      | CYP6AG18    | 499 | CYP3 clade (CYP6)       |          |
| 1341 | 108861 | 110823 | + | AalbCYP024      | CYP6AG6v1   | 499 | CYP3 clade (CYP6)       |          |
| 1341 | 123370 | 131911 | + | AalbCYP025      | CYP6AG5v1   | 501 | CYP3 clade (CYP6)       |          |
| 1411 | 79666  | 83650  | - | AalbCYP027      | CYP314A1    | 538 | Mitochondrial CYP clade |          |
| 1422 | 147003 | 148125 | + | CYP fragment    |             |     |                         | CYP325K3 |
| 1422 | 168163 | 169885 | - | AalbCYPpseudo06 | CYP325K2P   | 509 | CYP4 clade (CYP325)     |          |
| 1478 | 165533 | 167344 | - | AalbCYP028      | CYP9M9v1    | 530 | CYP3 clade (CYP9)       |          |
| 1509 | 39298  | 65005  | - | AalbCYP029      | CYP12F8     | 511 | Mitochondrial CYP clade |          |
| 1554 | 109854 | 111616 | + | CYP fragment    |             |     |                         | CYP15B1  |
| 1609 | 12946  | 28495  | - | AalbCYP032      | CYP304B3v1  | 515 | CYP2 clade              |          |
| 1609 | 42481  | 63255  | - | AalbCYP033      | CYP304B2v1  | 517 | CYP2 clade              |          |
| 1609 | 77526  | 78888  | - | CYP fragment    |             |     |                         | CYP304C1 |
| 1629 | 150285 | 182844 | - | AalbCYP037      | CYP4C38     | 544 | CYP4 clade (CYP4)       |          |
| 1701 | 48785  | 48979  | - | CYP fragment    |             |     |                         | CYP325M1 |
| 1701 | 60437  | 74389  | + | AalbCYP038      | CYP325M4v2  | 489 | CYP4 clade (CYP325)     |          |
| 1701 | 85052  | 87193  | + | AalbCYP039      | CYP325M5v2  | 502 | CYP4 clade (CYP325)     |          |
| 1701 | 95955  | 97503  | + | AalbCYP040      | CYP325L1v2  | 492 | CYP4 clade (CYP325)     |          |
| 1702 | 63384  | 65000  | + | AalbCYP041      | CYP6AG8     | 499 | CYP3 clade (CYP6)       |          |
| 1767 | 218115 | 219178 | - | AalbCYP042      | CYP4G35v1   | 554 | CYP4 clade (CYP4)       |          |
| 1788 | 200381 | 200785 | + | CYP fragment    |             |     |                         | CYP6A1   |
| 1804 | 190741 | 191043 | + | CYP fragment    |             |     |                         | CYP4D24  |
| 1811 | 137654 | 139392 | + | AalbCYP048      | CYP307B1    | 535 | CYP2 clade              |          |
| 2010 | 225812 | 235934 | + | CYP fragment    |             |     |                         | CYP325P1 |
| 2021 | 154437 | 177864 | + | AalbCYP049      | CYP6CD1v1   | 507 | CYP3 clade (CYP6)       |          |
| 2072 | 3244   | 3611   | - | CYP fragment    |             |     |                         | CYP4K3   |
| 2072 | 12628  | 24597  | - | AalbCYP050      | CYP4D24v2   | 505 | CYP4 clade (CYP4)       |          |
| 2072 | 42323  | 42517  | + | CYP fragment    |             |     |                         | CYP4D39  |
| 2388 | 18718  | 20249  | + | CYP fragment    |             |     |                         | CYP4J16  |
| 2446 | 207665 | 216903 | - | AalbCYP054      | CYP325AA1   | 504 | CYP4 clade (CYP325)     |          |
| 2512 | 161592 | 162173 | + | CYP fragment    |             |     |                         | CYP9AE1  |
| 2512 | 192886 | 195853 | - | CYP fragment    |             |     |                         | CYP9AE1  |
| 2512 | 216752 | 219094 | - | AalbCYP055      | CYP329B1v1  | 505 | CYP3 clade              |          |
| 2750 | 7680   | 10573  | - | AalbCYP059      | CYP6AG19    | 499 | CYP3 clade (CYP6)       |          |
| 2763 | 72284  | 74283  | + | AalbCYP060      | CYP329B1v2  | 515 | CYP3 clade              |          |
| 2763 | 81919  | 84874  | + | CYP fragment    |             |     |                         | CYP9AE1  |
| 2800 | 206952 | 208632 | + | AalbCYPpseudo10 | CYP9J28Pv1  | 535 | CYP3 clade (CYP9)       |          |
| 2866 | 107538 | 108277 | + | CYP fragment    |             |     |                         | CYP325Q1 |
| 2905 | 88362  | 90386  | - | AalbCYP062      | CYP12F5v2   | 526 | Mitochondrial CYP clade |          |
| 2905 | 99382  | 101596 | + | AalbCYP063      | CYP12F6v2   | 522 | Mitochondrial CYP clade |          |
| 2905 | 111369 | 126125 | - | AalbCYP064      | CYP12F7v2   | 524 | Mitochondrial CYP clade |          |
| 3177 | 3362   | 5226   | + | AalbCYP065      | CYP4AR2     | 500 | CYP4 clade (CYP4)       |          |
| 3692 | 99909  | 101854 | + | AalbCYP066      | CYP325Y1v1  | 498 | CYP4 clade (CYP325)     |          |
| 3692 | 114158 | 116312 | + | AalbCYP067      | CYP325Y2v1  | 498 | CYP4 clade (CYP325)     |          |
| 3789 | 5122   | 7015   | - | AalbCYP068      | CYP6M11v2   | 499 | CYP3 clade (CYP6)       |          |
| 3789 | 237786 | 239324 | - | AalbCYP069      | CYP6Z7      | 493 | CYP3 clade (CYP6)       |          |
| 3789 | 240434 | 242860 | + | AalbCYPpseudo13 | CYP6Z8P     | 490 | CYP3 clade (CYP6)       |          |
| 3790 | 10696  | 46530  | - | AalbCYP070      | CYP325E3v2  | 519 | CYP4 clade (CYP325)     |          |
| 3790 | 69918  | 70373  | - | CYP fragment    |             |     |                         | CYP325E  |
| 3790 | 110573 | 111556 | + | CYP fragment    |             |     |                         | CYP325V1 |
| 3790 | 121067 | 122834 | + | CYP fragment    |             |     |                         | CYP325T1 |
| 3790 | 155946 | 168229 | + | AalbCYP071      | CYP325T1v1  | 496 | CYP4 clade (CYP325)     |          |
| 3898 | 2723   | 4155   | + | CYP fragment    |             |     |                         | CYP6AG6  |
| 3898 | 16591  | 18980  | + | AalbCYP072      | CYP6AG6v2   | 499 | CYP3 clade (CYP6)       |          |
| 3898 | 27411  | 36234  | + | AalbCYP073      | CYP6AG5v2   | 501 | CYP3 clade (CYP6)       |          |
| 3899 | 7306   | 25323  | - | AalbCYP074      | CYP304B3v2  | 515 | CYP2 clade              |          |
| 3899 | 33892  | 43056  | - | AalbCYP075      | CYP304B2v2  | 517 | CYP2 clade              |          |
| 3899 | 99788  | 100150 | - | CYP fragment    |             |     |                         | CYP304C1 |
| 4011 | 137809 | 150351 | + | AalbCYP076      | CYP9J15v2   | 535 | CYP3 clade (CYP9)       |          |
| 4011 | 166507 | 168307 | + | AalbCYP077      | CYP9J16v2   | 538 | CYP3 clade (CYP9)       |          |
| 4011 | 181384 | 182947 | - | AalbCYPpseudo14 | CYP9J17Pv2  | 501 | CYP3 clade (CYP9)       |          |
| 4011 | 233468 | 235527 | + | AalbCYP078      | CYP9J9v2    | 542 | CYP3 clade (CYP9)       |          |
| 4011 | 247117 | 248936 | + | AalbCYP079      | CYP9J10v2   | 542 | CYP3 clade (CYP9)       |          |
| 4011 | 249095 | 250795 | + | AalbCYP080      | CYP9J18v2   | 546 | CYP3 clade (CYP9)       |          |

|       |        |        |   |                 |             |     |                         |           |
|-------|--------|--------|---|-----------------|-------------|-----|-------------------------|-----------|
| 4011  | 250912 | 252629 | + | AalbCYP081      | CYP9J19v2   | 541 | CYP3 clade (CYP9)       |           |
| 4011  | 265368 | 267284 | + | AalbCYP082      | CYP9J8v2    | 541 | CYP3 clade (CYP9)       |           |
| 4011  | 276699 | 278418 | + | AalbCYP083      | CYP9J20v1   | 535 | CYP3 clade (CYP9)       |           |
| 4011  | 287005 | 288959 | + | AalbCYP084      | CYP9J21v1   | 535 | CYP3 clade (CYP9)       |           |
| 4011  | 300117 | 302033 | + | AalbCYP085      | CYP9J22v1   | 534 | CYP3 clade (CYP9)       |           |
| 4161  | 36495  | 36896  | - | CYP fragment    |             |     |                         | CYP6A1    |
| 4176  | 33892  | 124100 | - | AalbCYP087      | CYP4C52v1   | 537 | CYP4 clade (CYP4)       |           |
| 4181  | 18705  | 27340  | + | AalbCYP088      | CYP325T1v2  | 496 | CYP4 clade (CYP325)     |           |
| 4181  | 40145  | 54661  | - | AalbCYP089      | CYP325S2v1  | 499 | CYP4 clade (CYP325)     |           |
| 4181  | 66333  | 70191  | - | AalbCYP090      | CYP325S3v1  | 500 | CYP4 clade (CYP325)     |           |
| 4181  | 80323  | 70191  | + | AalbCYP091      | CYP325S1v1  | 511 | CYP4 clade (CYP325)     |           |
| 4284  | 14812  | 16705  | - | CYP fragment    |             |     |                         | CYP4K3    |
| 4284  | 25572  | 42013  | - | AalbCYP092      | CYP4D24v1   | 505 | CYP4 clade (CYP4)       |           |
| 4284  | 59731  | 87020  | + | AalbCYP093      | CYP4D39     | 504 | CYP4 clade (CYP4)       |           |
| 4284  | 96919  | 132642 | - | AalbCYP094      | CYP4D38     | 502 | CYP4 clade (CYP4)       |           |
| 4284  | 150865 | 158953 | - | AalbCYP095      | CYP4D37     | 508 | CYP4 clade (CYP4)       |           |
| 4349  | 37400  | 55894  | + | AalbCYP096      | CYP6CD1v2   | 507 | CYP3 clade (CYP6)       |           |
| 4533  | 132369 | 134305 | - | AalbCYP097      | CYP9M7      | 533 | CYP3 clade (CYP9)       |           |
| 4533  | 137539 | 139789 | - | AalbCYP098      | CYP9M6v2    | 533 | CYP3 clade (CYP9)       |           |
| 4533  | 149805 | 151457 | - | AalbCYP099      | CYP9M15     | 530 | CYP3 clade (CYP9)       |           |
| 4555  | 147489 | 152421 | + | CYP fragment    |             |     |                         | CYP306A1  |
| 4681  | 39763  | 98089  | - | AalbCYP103      | CYP4C50     | 545 | CYP4 clade (CYP4)       |           |
| 4681  | 126699 | 150616 | - | AalbCYP104      | CYP4C51v1   | 547 | CYP4 clade (CYP4)       |           |
| 5079  | 71056  | 79919  | - | AalbCYP118      | CYP325Y2v2  | 498 | CYP4 clade (CYP325)     |           |
| 5079  | 90126  | 93487  | - | AalbCYP119      | CYP325Y1v2  | 498 | CYP4 clade (CYP325)     |           |
| 5098  | 100028 | 101613 | - | CYP fragment    |             |     |                         | CYP6CB1   |
| 5098  | 114116 | 115695 | + | AalbCYP120      | CYP6CB1v2   | 504 | CYP3 clade (CYP6)       |           |
| 5342  | 36243  | 45231  | + | AalbCYP121      | CYP303A1    | 497 | CYP2 clade              |           |
| 5391  | 17640  | 29786  | - | AalbCYP122      | CYP4C51v2   | 547 | CYP4 clade (CYP4)       |           |
| 5391  | 51903  | 94296  | - | AalbCYP123      | CYP4C52v2   | 537 | CYP4 clade (CYP4)       |           |
| 5573  | 69075  | 71185  | - | AalbCYP124      | CYP302A1    | 516 | Mitochondrial CYP clade |           |
| 5576  | 5050   | 6671   | + | CYP fragment    |             |     |                         | CYP325X4  |
| 5615  | 117642 | 118478 | + | CYP fragment    |             |     |                         | CYP325AA1 |
| 5671  | 53990  | 79022  | + | AalbCYP125      | CYP4G36     | 566 | CYP4 clade (CYP4)       |           |
| 5923  | 19898  | 21607  | - | AalbCYP129      | CYP4H33     | 506 | CYP4 clade (CYP4)       |           |
| 6469  | 29720  | 47511  | - | AalbCYP143.1    | CYP6AK1     | 525 | CYP3 clade (CYP6)       |           |
| 6469  | 29720  | 31739  | - | AalbCYP143.2    | CYP6AK1     | 544 | CYP3 clade (CYP6)       |           |
| 6622  | 71346  | 80887  | + | AalbCYP144      | CYP18A1     | 533 | CYP2 clade              |           |
| 6622  | 81823  | 105137 | - | CYP fragment    |             |     |                         | CYP306A1  |
| 6639  | 33079  | 35339  | - | AalbCYP145      | CYP325S1v2  | 511 | CYP4 clade (CYP325)     |           |
| 6639  | 55027  | 66166  | + | AalbCYPpseudo15 | CYP325S3Pv2 | 515 | CYP4 clade (CYP325)     |           |
| 6639  | 84432  | 102349 | + | AalbCYP146      | CYP325S2v2  | 499 | CYP4 clade (CYP325)     |           |
| 6658  | 77878  | 79997  | + | AalbCYP147      | CYP325Z1    | 528 | CYP4 clade (CYP325)     |           |
| 6658  | 91035  | 92747  | - | CYP fragment    |             |     |                         | CYP4      |
| 6688  | 84607  | 100288 | - | AalbCYP148      | CYP325R1    | 502 | CYP4 clade (CYP325)     |           |
| 6808  | 19347  | 27838  | - | AalbCYP149      | CYP4H28     | 502 | CYP4 clade (CYP4)       |           |
| 6808  | 47717  | 71201  | + | AalbCYPpseudo23 | CYP4H30P    | 497 | CYP4 clade (CYP4)       |           |
| 7074  | 64830  | 73279  | - | AalbCYP151      | CYP4H29     | 512 | CYP4 clade (CYP4)       |           |
| 7257  | 16081  | 26137  | + | CYP fragment    |             |     |                         | CYP49A1   |
| 7278  | 5503   | 7082   | - | AalbCYP152      | CYP6BB2     | 507 | CYP3 clade (CYP6)       |           |
| 7278  | 33482  | 35059  | - | AalbCYP153      | CYP6AA6     | 504 | CYP3 clade (CYP6)       |           |
| 7278  | 44434  | 46118  | - | AalbCYP154      | CYP6AA5     | 504 | CYP3 clade (CYP6)       |           |
| 7278  | 59009  | 60896  | - | AalbCYP155      | CYP6BZ1     | 502 | CYP3 clade (CYP6)       |           |
| 7278  | 61308  | 62885  | - | AalbCYP156      | CYP6P12     | 508 | CYP3 clade (CYP6)       |           |
| 7278  | 78288  | 79842  | - | AalbCYP157      | CYP6CC1     | 495 | CYP3 clade (CYP6)       |           |
| 7704  | 47611  | 49146  | + | AalbCYP162      | CYP6AL3v1   | 511 | CYP3 clade (CYP6)       |           |
| 7829  | 62762  | 64935  | - | AalbCYP163      | CYP9J28v2   | 536 | CYP3 clade (CYP9)       |           |
| 7829  | 71228  | 72905  | + | AalbCYP164      | CYP9J26     | 536 | CYP3 clade (CYP9)       |           |
| 7829  | 75054  | 76728  | + | AalbCYP165      | CYP9J27     | 536 | CYP3 clade (CYP9)       |           |
| 8023  | 85578  | 85919  | + | CYP fragment    |             |     |                         | CYP301A1  |
| 8069  | 6997   | 15237  | + | AalbCYP166      | CYP325X1v1  | 506 | CYP4 clade (CYP325)     |           |
| 8069  | 23224  | 35725  | + | AalbCYP167      | CYP325X2v1  | 508 | CYP4 clade (CYP325)     |           |
| 8069  | 53972  | 54493  | + | CYP fragment    |             |     |                         | CYP325X2  |
| 8069  | 79760  | 80161  | + | CYP fragment    |             |     |                         | CYP325X4  |
| 8405  | 5288   | 8944   | + | AalbCYPpseudo16 | CYP9J20Pv2  | 535 | CYP3 clade (CYP9)       |           |
| 8405  | 14588  | 16516  | + | AalbCYP168      | CYP9J21v2   | 488 | CYP3 clade (CYP9)       |           |
| 8405  | 27130  | 28689  | + | AalbCYPpseudo17 | CYP9J61P    | 498 | CYP3 clade (CYP9)       |           |
| 8405  | 29595  | 31262  | + | AalbCYP169      | CYP9J22Pv2  | 534 | CYP3 clade (CYP9)       |           |
| 8405  | 49663  | 51332  | + | AalbCYP170      | CYP9J23v1   | 533 | CYP3 clade (CYP9)       |           |
| 8405  | 67140  | 68864  | + | AalbCYP171      | CYP9J7      | 530 | CYP3 clade (CYP9)       |           |
| 8585  | 8267   | 19832  | + | AalbCYP172      | CYP325X1v2  | 506 | CYP4 clade (CYP325)     |           |
| 8585  | 27319  | 40100  | + | AalbCYP173      | CYP325X2v2  | 509 | CYP4 clade (CYP325)     |           |
| 8585  | 54866  | 55555  | + | CYP fragment    |             |     |                         | CYP325X2  |
| 8585  | 65293  | 65832  | + | CYP fragment    |             |     |                         | CYP325X4  |
| 8606  | 3487   | 5022   | - | AalbCYP174      | CYP6AL3v2   | 511 | CYP3 clade (CYP6)       |           |
| 8717  | 49071  | 70504  | - | CYP fragment    |             |     |                         | CYP301A1  |
| 9205  | 34599  | 36868  | - | CYP fragment    |             |     |                         | CYP9J     |
| 9205  | 45671  | 46213  | - | CYP fragment    |             |     |                         | CYP9J     |
| 9542  | 22110  | 23776  | - | AalbCYPpseudo21 | CYP9J22Pv3  | 533 | CYP3 clade (CYP9)       |           |
| 9907  | 36456  | 56121  | + | AalbCYP188      | CYP325T2v2  | 496 | CYP4 clade (CYP325)     |           |
| 10142 | 3231   | 18765  | + | AalbCYP001      | CYP6AH1     | 503 | CYP3 clade (CYP6)       |           |
| 10584 | 881    | 3011   | - | AalbCYP005      | CYP9J2v2    | 538 | CYP3 clade (CYP9)       |           |
| 10876 | 19592  | 20161  | + | CYP fragment    |             |     |                         | CYP9AE1   |
| 11205 | 26115  | 27766  | + | AalbCYP008      | CYP9M8      | 531 | CYP3 clade (CYP9)       |           |
| 11382 | 21794  | 23574  | + | AalbCYP009      | CYP325M3v2  | 499 | CYP4 clade (CYP325)     |           |
| 11382 | 41868  | 43629  | + | AalbCYP010      | CYP325M6v2  | 499 | CYP4 clade (CYP325)     |           |
| 11625 | 13476  | 13922  | - | CYP fragment    |             |     |                         | CYP307A1  |
| 11762 | 25202  | 39996  | + | CYP fragment    |             |     |                         | CYP325    |

|        |        |        |   |                 |            |     |                   |           |
|--------|--------|--------|---|-----------------|------------|-----|-------------------|-----------|
| 13104  | 28204  | 29336  | + | CYP fragment    |            |     |                   | CYP315A1  |
| 13225  | 2807   | 11957  | + | CYP fragment    |            |     |                   | CYP325M1  |
| 13327  | 16330  | 17302  | + | CYP fragment    |            |     |                   | CYP4D24   |
| 13834  | 3      | 986    | + | CYP fragment    |            |     |                   | CYP6Z8    |
| 13834  | 18501  | 20044  | - | AalbCYP026      | CYP6Z9     | 492 | CYP3 clade (CYP6) |           |
| 15348  | 1857   | 3792   | + | AalbCYP030      | CYP9J22v4  | 534 | CYP3 clade (CYP9) |           |
| 15348  | 15229  | 16900  | + | AalbCYPpseudo07 | CYP9J23Pv2 | 532 | CYP3 clade (CYP9) |           |
| 15832  | 14111  | 15792  | + | AalbCYP031      | CYP9J60    | 540 | CYP3 clade (CYP9) |           |
| 17116  | 2308   | 3421   | + | CYP fragment    |            |     |                   | CYP325AA1 |
| 17647  | 11705  | 12781  | + | CYP fragment    |            |     |                   | CYP6Z9    |
| 18567  | 5323   | 5514   | + | CYP fragment    |            |     |                   | CYP4C50   |
| 22153  | 5141   | 5648   | - | CYP fragment    |            |     |                   | CYP315A1  |
| 23311  | 1      | 1717   | - | AalbCYPpseudo08 | CYP9J2Pv3  | 522 | CYP3 clade (CYP9) |           |
| 25433  | 980    | 1948   | + | CYP fragment    |            |     |                   | CYP325    |
| 28303  | 2      | 688    | + | CYP fragment    |            |     |                   | CYP9AE1   |
| 29929  | 537    | 1969   | + | CYP fragment    |            |     |                   | CYP4D38   |
| 35924  | 1461   | 2225   | + | CYP fragment    |            |     |                   | CYP4H29   |
| 40958  | 1094   | 1249   | - | CYP fragment    |            |     |                   | CYP315A1  |
| 41983  | 635    | 1383   | + | CYP fragment    |            |     |                   | CYP49A1   |
| 61826  | 184    | 691    | - | CYP fragment    |            |     |                   | CYP315A1  |
| 176070 | 495    | 668    | - | CYP fragment    |            |     |                   | CYP9J30   |
| 177207 | 18     | 602    | + | CYP fragment    |            |     |                   | CYP301A1  |
| 181158 | 2      | 454    | - | CYP fragment    |            |     |                   | CYP9J30   |
| 1036_0 | 127475 | 156198 | + | CYP fragment    |            |     |                   | CYP49A1   |
| 1036_2 | 5670   | 9207   | + | CYP fragment    |            |     |                   | CYP49A1   |
| 2844_2 | 16475  | 18304  | + | AalbCYPpseudo12 | CYP9M9Pv2  | 526 | CYP3 clade (CYP9) |           |

\* if the same gene ID is followed by ".#" where # is a number, alternative spliced gene isoforms can be produced from the same locus

\*\* according to the phylogenetic analysis performed in this study

\*\*\* of CYP fragment with mosquito/fly CYP protein query
