# Supplementary material
Source: PubMed Central journal article supplement (PMC4640774)
Supplement: pnas.1516410112.sd13.pdf [file pnas.1516410112.sd13.pdf]

**Table S5-2. Accession numbers of CYP sequences used for phylogenetic analysis**

| <i>Ae. albopictus</i> | <i>Aedes aegypti</i>    | <i>An. gambiae</i>     | <i>D. melanogaster</i>       | P450 markers (Feyereisen 2012) |
|-----------------------|-------------------------|------------------------|------------------------------|--------------------------------|
| AalbCYP001            | AAEL000320-RA CYP325T1  | AGAP000088-RA CYP4H19  | DmelFBpp0070094 Cyp4g1-PA    | CYP12A1-Mdom                   |
| AalbCYP002            | AAEL000325-RA CYP325S2  | AGAP000192-RA CYP4C26  | DmelFBpp0070371 Cyp4d2-PA    | CYP12A4-Dmel                   |
| AalbCYP003            | AAEL000326-RA CYP325S1  | AGAP000193-RA CYP4C37  | DmelFBpp0070372 Cyp4ae1-PA   | CYP15A1-Dpun                   |
| AalbCYP004            | AAEL000338-RA CYP325E3  | AGAP000194-RA CYP4C25  | DmelFBpp0070410 Cyp4d14-PA   | CYP18A1-Dmel                   |
| AalbCYP005            | AAEL000340-RA CYP325P1  | AGAP000284-RA CYP315A1 | DmelFBpp0070412 Cyp4d1-PA    | CYP301A1-Dmel                  |
| AalbCYP006            | AAEL000357-RA CYP325S3  | AGAP000818-RA CYP4K1   | DmelFBpp0071839 Cyp6d2-PA    | CYP302A1-Dmel                  |
| AalbCYP007            | AAEL001288-RA CYP9M5    | AGAP000877-RA CYP4G17  | DmelFBpp0072228 Cyp9c1-PA    | CYP303A1-Dmel                  |
| AalbCYP008            | AAEL001292-RA CYP9M7    | AGAP001039-RB CYP307A1 | DmelFBpp0072837 Cyp4d20-PA   | CYP306A1-Bmor                  |
| AalbCYP009            | AAEL001312-RA CYP9M6    | AGAP001076-RA CYP4G16  | DmelFBpp0073061 Cyp302a1-PA  | CYP307A1-Dmel                  |
| AalbCYP010            | AAEL001320-RA CYP9M4    | AGAP001443-RA CYP325J1 | DmelFBpp0073352 Cyp4g15-PA   | CYP307A2-Dmel                  |
| AalbCYP011            | AAEL001807-RA CYP9M9    | AGAP001861-RA CYP4H14  | DmelFBpp0073409 Cyp28c1-PA   | CYP307B1-Amel                  |
| AalbCYP012            | AAEL001960-RA CYP12F5   | AGAP001864-RA CYP4H15  | DmelFBpp0073460 Cyp318a1-PA  | CYP314A1-Dmel                  |
| AalbCYP013            | AAEL002005-RA CYP12F6   | AGAP002138-RA CYP325H1 | DmelFBpp0073473 Cyp311a1-PB  | CYP315A1-Dmel                  |
| AalbCYP014            | AAEL002031-RA CYP12F7   | AGAP002195-RB CYP325F2 | DmelFBpp0073845 Cyp4s3-PA    | CYP321A1-Hzea                  |
| AalbCYP015            | AAEL002043-RA CYP305A5  | AGAP002196-RA CYP325G1 | DmelFBpp0074374 Cyp306a1-PA  | CYP3A4-human                   |
| AalbCYP016            | AAEL002046-RA CYP6CB1   | AGAP002197-RA CYP325F1 | DmelFBpp0074375 Cyp308a1-PA  | CYP49A1-Dmel                   |
| AalbCYP017            | AAEL002067-RA CYP15B1   | AGAP002202-RA CYP325E1 | DmelFBpp0074380 Cyp18a1-PA   | CYP4AA1-Amel                   |
| AalbCYP018            | AAEL002071-RA CYP305A6  | AGAP002205-RA CYP325C2 | DmelFBpp0074694 Cyp305a1-PA  | CYP4AV1-Amel                   |
| AalbCYP019            | AAEL002085-RA CYP4H31   | AGAP002206-RA CYP325D1 | DmelFBpp0074858 Cyp12c1-PA   | CYP4C1 Bdis                    |
| AalbCYP020.1          | AAEL002633-RB CYP9J31   | AGAP002207-RA CYP325C1 | DmelFBpp0074901 Cyp312a1-PA  | CYP4C21-Bger                   |
| AalbCYP020.2          | AAEL002638-RA CYP9J6    | AGAP002208-RA CYP325A3 | DmelFBpp0076543 Cyp4d8-PA    | CYP4C7-Dpun                    |
| AalbCYP021            | AAEL002872-RA CYP6CB2   | AGAP002209-RA CYP325A2 | DmelFBpp0076836 Cyp307a1-PA  | CYP4G1-Dmel                    |
| AalbCYP022            | AAEL003380-RA CYP4H28   | AGAP002210-RA CYP325B1 | DmelFBpp0076908 Cyp6t1-PA    | CYP4G15-Dmel                   |
| AalbCYP023            | AAEL003399-RA CYP4H30   | AGAP002211-RA CYP325A1 | DmelFBpp0076968 Cyp6v1-PA    | CYP6A1-Mdom                    |
| AalbCYP024            | AAEL003748-RA CYP9AE1   | AGAP002416-RA CYP4K2   | DmelFBpp0077428 Cyp309a2-PA  | CYP6A2-Dmel                    |
| AalbCYP025            | AAEL003763-RA CYP329B1  | AGAP002417-RA CYP4AR1  | DmelFBpp0078697 Cyp28d2-PA   | CYP6A8-Dmel                    |
| AalbCYP026            | AAEL003890-RA           | AGAP002418-RA CYP4D15  | DmelFBpp0078698 Cyp28d1-PA   | CYP6AB3-Dpas                   |
| AalbCYP027            | AAEL004012-RA CYP325AA1 | AGAP002419-RA CYP4D22  | DmelFBpp0078701 Cyp4ac1-PA   | CYP6AE14-Harm                  |
| AalbCYP028            | AAEL004054-RA CYP4G36   | AGAP002429-RA CYP314A1 | DmelFBpp0078703 Cyp4ac3-PA   | CYP6AS1-Amel                   |
| AalbCYP029            | AAEL004870-RA CYP18A1   | AGAP002555-RA CYP325K1 | DmelFBpp0079095 Cyp4d21-PA   | CYP6B1-Ppol                    |
| AalbCYP030            | AAEL004888-RA CYP306A1  | AGAP002862-RA CYP6AA1  | DmelFBpp0079515 Cyp4e3-PA    | CYP6B3-Ppol                    |
| AalbCYP031            | AAEL004941-RA CYP6AK1   | AGAP002865-RA CYP6P3   | DmelFBpp0080164 Cyp28a5-PA   | CYP6CM1-Btab                   |
| AalbCYP032            | AAEL005006-RA CYP6CD1   | AGAP002866-RA CYP6P5   | DmelFBpp0080386 Cyp303a1-PA  | CYP6D1-Mdom                    |
| AalbCYP033            | AAEL005695-RA CYP325X1  | AGAP002867-RA CYP6P4   | DmelFBpp0080627 Cyp310a1-PA  | CYP6G1-Dmel                    |
| AalbCYP034            | AAEL005696-RA CYP325X2  | AGAP002868-RA CYP6P1   | DmelFBpp0081379 Cyp313b1-PA  | CYP6M2-Agam                    |
| AalbCYP035            | AAEL005700-RA CYP325X4  | AGAP002869-RA CYP6P2   | DmelFBpp0081949 Cyp315a1-PA  | CYP6P3-Agam                    |
| AalbCYP036            | AAEL005771-RA CYP325K2  | AGAP002870-RA CYP6AD1  | DmelFBpp0082070 Cyp9f2-PA    | CYP6Z2-Agam                    |
| AalbCYP037            | AAEL005775-RA CYP325R1  | AGAP002894-RA CYP6Z4   | DmelFBpp0082086 Cyp313a3-PA  | CYP9E1-Dpun                    |
| AalbCYP038            | AAEL005788-RA CYP325K3  | AGAP003065-RA CYP11179 | DmelFBpp0082088 Cyp313a5-PA  | CYP9P2 Amel Nelson site        |
| AalbCYP039            | AAEL006044-RA CYP325Q1  | AGAP003066-RA CYP304B1 | DmelFBpp0082136 Cyp313a4-PA  | CYP9P7 Lhum                    |
| AalbCYP040            | AAEL006058-RA CYP325Q2  | AGAP003067-RA CYP304C1 | DmelFBpp0082159 Cyp304a1-PA  |                                |
| AalbCYP041            | AAEL006257-RA CYP325Y1  | AGAP003343-RA CYP6AG1  | DmelFBpp0082413 Cyp313a1-PA  |                                |
| AalbCYP042            | AAEL006784-RA CYP9J17   | AGAP003522-RA CYP329A1 | DmelFBpp0083144 Cyp12a5-PA   |                                |
| AalbCYP043            | AAEL006793-RA CYP9J9    | AGAP003608-RA CYP4AA1  | DmelFBpp0083145 Cyp12a4-PA   |                                |
| AalbCYP044            | AAEL006795-RA CYP9J15   | AGAP004665-RA CYP306A1 | DmelFBpp0083697 Cyp6d4-PA    |                                |
| AalbCYP045            | AAEL006798-RA CYP9J10   | AGAP005656-RA CYP305A1 | DmelFBpp0084553 Cyp6a18-PA   |                                |
| AalbCYP046            | AAEL006802-RA CYP9J22   | AGAP005657-RA CYP305A3 | DmelFBpp0085074 Cyp4c3-PA    |                                |
| AalbCYP047            | AAEL006805-RA CYP9J2    | AGAP005658-RA CYP15B1  | DmelFBpp0085332 Cyp6w1-PA    |                                |
| AalbCYP048            | AAEL006811-RA CYP9J8    | AGAP005660-RA CYP305A4 | DmelFBpp0085466 Cyp6a2-PA    |                                |
| AalbCYP049            | AAEL006814-RA CYP9J20   | AGAP005774-RA CYP49A1  | DmelFBpp0085516 Cyp6u1-PA    |                                |
| AalbCYP050            | AAEL006815-RA CYP9J16   | AGAP005992-RA CYP302A1 | DmelFBpp0085792 Cyp12b2-PA   |                                |
| AalbCYP051            | AAEL006824-RA           | AGAP006047-RA CYP4J9   | DmelFBpp0086536 Cyp317a1-PA  |                                |
| AalbCYP052            | AAEL006827-RA CYP12F8   | AGAP006048-RA CYP4J5   | DmelFBpp0086580 Cyp6a22-PA   |                                |
| AalbCYP053            | AAEL006875-RA CYP307B1  | AGAP006049-RA CYP4J10  | DmelFBpp0086581 Cyp6a17-PA   |                                |
| AalbCYP054            | AAEL006984-RA CYP6AG5   | AGAP006082-RA CYP301A1 | DmelFBpp0086582 Cyp6a23-PA   |                                |
| AalbCYP055            | AAEL006989-RA CYP6AG7   | AGAP007480-RA CYP6AH1  | DmelFBpp0086583 Cyp6a19-PA   |                                |
| AalbCYP056            | AAEL006992-RA CYP6AG6   | AGAP008018-RA CYP12F4  | DmelFBpp0086585 Cyp6a8-PA    |                                |
| AalbCYP057            | AAEL007010-RA CYP6AG4   | AGAP008019-RA CYP12F3  | DmelFBpp0086586 Cyp6a21-PA   |                                |
| AalbCYP058            | AAEL007024-RA CYP6AG3   | AGAP008020-RA CYP12F2  | DmelFBpp0086933 Cyp9h1-PA    |                                |
| AalbCYP059            | AAEL007473-RA CYP6AH1   | AGAP008022-RA CYP12F1  | DmelFBpp0086937 Cyp301a1-PA  |                                |
| AalbCYP060            | AAEL007795-RA CYP4D37   | AGAP008203-RA CYP6S2   | DmelFBpp0087100 Cyp6g1-PA    |                                |
| AalbCYP061            | AAEL007798-RA CYP4K3    | AGAP008204-RA CYP6S1   | DmelFBpp0087101 Cyp6t3-PA    |                                |
| AalbCYP062            | AAEL007807-RA CYP4D38   | AGAP008205-RA CYP6R1   | DmelFBpp0087117 Cyp6g2-PA    |                                |
| AalbCYP063            | AAEL007808-RA CYP4D39   | AGAP008206-RA CYP6N2   | DmelFBpp0087403 Cyp49a1-PA   |                                |
| AalbCYP064            | AAEL007812-RA CYP4H32   | AGAP008207-RA CYP6Y2   | DmelFBpp0087672 Cyp4p2-PA    |                                |
| AalbCYP065            | AAEL007815-RA CYP4D24   | AGAP008208-RA CYP6Y1   | DmelFBpp0087673 Cyp4p1-PA    |                                |
| AalbCYP066            | AAEL007816-RA CYP4D23   | AGAP008209-RA CYP6M1   | DmelFBpp0087674 Cyp4p3-PA    |                                |
| AalbCYP067            | AAEL007830-RA CYP4H29   | AGAP008210-RA CYP6N1   | DmelFBpp0087770 Cyp6a13-PA   |                                |
| AalbCYP068            | AAEL008017-RA CYP4C50   | AGAP008212-RA CYP6M2   | DmelFBpp0087824 Cyp4e2-PA    |                                |
| AalbCYP069            | AAEL008018-RA CYP4C51   | AGAP008213-RA CYP6M3   | DmelFBpp0087825 Cyp4e1-PA    |                                |
| AalbCYP070            | AAEL008023-RA CYP4C52   | AGAP008214-RA CYP6M4   | DmelFBpp0087839 Cyp4ad1-PA   |                                |
| AalbCYP071            | AAEL008345-RA CYP4G35   | AGAP008217-RA CYP6Z3   | DmelFBpp0088126 Cyp9b2-PA    |                                |
| AalbCYP072            | AAEL008638-RA CYP49A1   | AGAP008218-RA CYP6Z2   | DmelFBpp0088127 Cyp9b1-PA    |                                |
| AalbCYP073            | AAEL008846-RA CYP9J32   | AGAP008219-RA CYP6Z1   | DmelFBpp0088436 Cyp12d1-d-PA |                                |

|              |                        |                        |                             |
|--------------|------------------------|------------------------|-----------------------------|
| AalbCYP074   | AAEL008889-RA CYP6AL1  | AGAP008356-RA CYP4H16  | DmelFBpp0088707 Cyp6d5-PA   |
| AalbCYP075   | AAEL009018-RA          | AGAP008358-RA CYP4H17  | DmelFBpp0089324 Cyp314a1-PA |
| AalbCYP076   | AAEL009117-RA CYP6M5   | AGAP008552-RA CYP4H27  | DmelFBpp0113050 Cyp4aa1-PB  |
| AalbCYP077   | AAEL009120-RA CYP6S3   | AGAP008682-RA CYP307B1 | DmelFBpp0289404 Cyp6a20-PB  |
| AalbCYP078   | AAEL009121-RA CYP6N9   | AGAP009240-RA CYP4C35  | DmelFBpp0289405 Cyp6a9-PB   |
| AalbCYP079   | AAEL009122-RA CYP6N15  | AGAP009241-RA CYP4C36  | DmelFBpp0289444 Cyp307a2-PA |
| AalbCYP080   | AAEL009123-RA CYP6Z6   | AGAP009246-RA CYP4C27  | DmelFBpp0289683 Cyp4ac2-PB  |
| AalbCYP081   | AAEL009124-RA CYP6N12  | AGAP009363-RA CYP9M1   | DmelFBpp0290498 Cyp12e1-PC  |
| AalbCYP082   | AAEL009125-RA CYP6M10  | AGAP009375-RA CYP9M2   | DmelFBpp0300785 Cyp313a2-PB |
| AalbCYP083   | AAEL009126-RA CYP6N6   | AGAP009696-RA CYP325C3 | DmelFBpp0302888 Cyp6a14-PD  |
| AalbCYP084   | AAEL009127-RA CYP6M11  | AGAP010077-RA CYP303A1 | DmelFBpp0304450 Cyp316a1-PB |
| AalbCYP085   | AAEL009128-RA CYP6M6   | AGAP010414-RA CYP4C28  | DmelFBpp0307160 Cyp309a1-PB |
| AalbCYP086   | AAEL009129-RA CYP6Z9   | AGAP010961-RA CYP6AK1  | DmelFBpp0309923 Cyp6a16-PB  |
| AalbCYP087   | AAEL009130-RA CYP6Z7   | AGAP010966-RA CYP6AJ1  |                             |
| AalbCYP088   | AAEL009131-RA CYP6Z8   | AGAP011028-RA CYP6AF1  |                             |
| AalbCYP089   | AAEL009132-RA CYP6Y3   | AGAP011029-RA CYP6AF2  |                             |
| AalbCYP090   | AAEL009133-RA CYP6N14  | AGAP012291-RA CYP9J3   |                             |
| AalbCYP091   | AAEL009137-RA CYP6N13  | AGAP012292-RA CYP9J4   |                             |
| AalbCYP092   | AAEL009138-RA CYP6N11  | AGAP012293-RA CYP9L3   |                             |
| AalbCYP093   | AAEL009591-RA CYP9M8   | AGAP012294-RA CYP9L2   |                             |
| AalbCYP094   | AAEL009656-RA CYP6AL3  | AGAP012295-RA CYP9L1   |                             |
| AalbCYP095   | AAEL009762-RA CYP307A1 | AGAP012296-RA CYP9J5   |                             |
| AalbCYP096   | AAEL010151-RA CYP6N16  | AGAP012957-RA CYP4D17  |                             |
| AalbCYP097   | AAEL010154-RA CYP4AR2  | AGAP013128-RA CYP6AA2  |                             |
| AalbCYP098   | AAEL010158-RA CYP6N17  | AGAP013224-RA CYP4H26  |                             |
| AalbCYP099   | AAEL010273-RA CYP325Z1 | AGAP013241-RA CYP4D16  |                             |
| AalbCYP100   | AAEL010946-RA CYP314A1 | AGAP013305-RA CYP4H25  |                             |
| AalbCYP101   | AAEL011463-RB          | AGAP013490-RA CYP4H24  |                             |
| AalbCYP102   | AAEL011761-RA CYP325M5 | AGAP013511-RA CYP6AG2  |                             |
| AalbCYP103   | AAEL011769-RA CYP325M4 | AGAP028019-RA CYP4H18  |                             |
| AalbCYP104   | AAEL011770-RA CYP325L1 |                        |                             |
| AalbCYP105   | AAEL011850-RA CYP315A1 |                        |                             |
| AalbCYP106   | AAEL012144-RA CYP303A1 |                        |                             |
| AalbCYP107   | AAEL012266-RA CYP4C38  |                        |                             |
| AalbCYP108   | AAEL012491-RA CYP6P12  |                        |                             |
| AalbCYP109   | AAEL012492-RA CYP6AA5  |                        |                             |
| AalbCYP110   | AAEL012494-RA CYP6BZ1  |                        |                             |
| AalbCYP111   | AAEL012761-RA CYP325T2 |                        |                             |
| AalbCYP112   | AAEL012762-RA CYP325N2 |                        |                             |
| AalbCYP113   | AAEL012765-RA CYP325M3 |                        |                             |
| AalbCYP114   | AAEL012766-RA CYP325G2 |                        |                             |
| AalbCYP115   | AAEL012769-RA CYP325M2 |                        |                             |
| AalbCYP116   | AAEL012770-RA CYP325N1 |                        |                             |
| AalbCYP117   | AAEL012772-RA CYP325G3 |                        |                             |
| AalbCYP118   | AAEL012773-RA CYP325M1 |                        |                             |
| AalbCYP119   | AAEL013554-RA CYP4J14  |                        |                             |
| AalbCYP120   | AAEL013555-RA CYP4J13  |                        |                             |
| AalbCYP121   | AAEL013556-RA CYP4J15  |                        |                             |
| AalbCYP122   | AAEL013798-RA CYP4H33  |                        |                             |
| AalbCYP123   | AAEL014019-RA CYP4J16  |                        |                             |
| AalbCYP124   | AAEL014019-RB CYP4J16  |                        |                             |
| AalbCYP125   | AAEL014208-RA CYP307B1 |                        |                             |
| AalbCYP126   | AAEL014411-RA CYP304B3 |                        |                             |
| AalbCYP127   | AAEL014412-RA CYP304B2 |                        |                             |
| AalbCYP128   | AAEL014413-RA CYP304C1 |                        |                             |
| AalbCYP129   | AAEL014594-RA CYP301A1 |                        |                             |
| AalbCYP130   | AAEL014603-RA CYP9J30  |                        |                             |
| AalbCYP131   | AAEL014604-RA CYP9J20  |                        |                             |
| AalbCYP132   | AAEL014605-RA CYP9J9   |                        |                             |
| AalbCYP133   | AAEL014606-RA CYP9J7   |                        |                             |
| AalbCYP134   | AAEL014607-RA CYP9J27  |                        |                             |
| AalbCYP135   | AAEL014608-RA CYP9J8   |                        |                             |
| AalbCYP136   | AAEL014609-RA CYP9J26  |                        |                             |
| AalbCYP137   | AAEL014610-RA CYP9J29  |                        |                             |
| AalbCYP138   | AAEL014611-RA CYP9J19  |                        |                             |
| AalbCYP139   | AAEL014612-RA          |                        |                             |
| AalbCYP140   | AAEL014613-RA CYP9J24  |                        |                             |
| AalbCYP141   | AAEL014614-RA CYP9J10  |                        |                             |
| AalbCYP142   | AAEL014615-RA CYP9J23  |                        |                             |
| AalbCYP143.1 | AAEL014616-RA CYP9J27  |                        |                             |
| AalbCYP143.2 | AAEL014617-RA CYP9J28  |                        |                             |
| AalbCYP144   | AAEL014618-RA CYP9J18  |                        |                             |
| AalbCYP145   | AAEL014619-RA CYP9J22  |                        |                             |
| AalbCYP146   | AAEL014678-RA CYP6F2   |                        |                             |
| AalbCYP147   | AAEL014684-RA CYP6F3   |                        |                             |
| AalbCYP148   | AAEL014829-RB          |                        |                             |

|                 |                        |  |  |
|-----------------|------------------------|--|--|
| AalbCYP149      | AAEL014890-RA CYP6CC1  |  |  |
| AalbCYP150      | AAEL014891-RA CYP6P12  |  |  |
| AalbCYP151      | AAEL014892-RA CYP6BZ1  |  |  |
| AalbCYP152      | AAEL014893-RA CYP6BB2  |  |  |
| AalbCYP153      | AAEL014924-RB          |  |  |
| AalbCYP154      | AAEL015361-RA CYP325Y3 |  |  |
| AalbCYP155      | AAEL015362-RA          |  |  |
| AalbCYP156      | AAEL015591-RA          |  |  |
| AalbCYP157      | AAEL015654-RA CYP6AG8  |  |  |
| AalbCYP158      | AAEL015655-RA CYP302A1 |  |  |
| AalbCYP159      | AAEL015663-RA CYP4J16  |  |  |
| AalbCYP160      | AAEL017136-RA CYP325V1 |  |  |
| AalbCYP161      | AAEL017215-RA CYP325U1 |  |  |
| AalbCYP162      | AAEL017297-RA CYP6M9   |  |  |
| AalbCYP163      | AAEL017539-RA CYP6BY1  |  |  |
| AalbCYP164      | AAEL018044-RA CYP9J18  |  |  |
| AalbCYP165      | AAEL018045-RA CYP9J19  |  |  |
| AalbCYP166      | AAEL900030-RB CYP325Y2 |  |  |
| AalbCYP167      |                        |  |  |
| AalbCYP168      |                        |  |  |
| AalbCYP169      |                        |  |  |
| AalbCYP170      |                        |  |  |
| AalbCYP171      |                        |  |  |
| AalbCYP172      |                        |  |  |
| AalbCYP173      |                        |  |  |
| AalbCYP174      |                        |  |  |
| AalbCYP175      |                        |  |  |
| AalbCYP176      |                        |  |  |
| AalbCYP177      |                        |  |  |
| AalbCYP178      |                        |  |  |
| AalbCYP179      |                        |  |  |
| AalbCYP180      |                        |  |  |
| AalbCYP181      |                        |  |  |
| AalbCYP182      |                        |  |  |
| AalbCYP183      |                        |  |  |
| AalbCYP184      |                        |  |  |
| AalbCYP185      |                        |  |  |
| AalbCYP186      |                        |  |  |
| AalbCYP187      |                        |  |  |
| AalbCYP188      |                        |  |  |
| AalbCYPpseudo01 |                        |  |  |
| AalbCYPpseudo02 |                        |  |  |
| AalbCYPpseudo03 |                        |  |  |
| AalbCYPpseudo04 |                        |  |  |
| AalbCYPpseudo05 |                        |  |  |
| AalbCYPpseudo06 |                        |  |  |
| AalbCYPpseudo07 |                        |  |  |
| AalbCYPpseudo08 |                        |  |  |
| AalbCYPpseudo09 |                        |  |  |
| AalbCYPpseudo10 |                        |  |  |
| AalbCYPpseudo11 |                        |  |  |
| AalbCYPpseudo12 |                        |  |  |
| AalbCYPpseudo13 |                        |  |  |
| AalbCYPpseudo14 |                        |  |  |
| AalbCYPpseudo15 |                        |  |  |
| AalbCYPpseudo16 |                        |  |  |
| AalbCYPpseudo17 |                        |  |  |
| AalbCYPpseudo18 |                        |  |  |
| AalbCYPpseudo19 |                        |  |  |
| AalbCYPpseudo20 |                        |  |  |
| AalbCYPpseudo21 |                        |  |  |
| AalbCYPpseudo22 |                        |  |  |
