# Supplementary material
Source: PubMed Central journal article supplement (PMC4640774)
Supplement: pnas.1516410112.sd14.pdf [file pnas.1516410112.sd14.pdf]

**Table S5-4. Genome coordinates of the *Ae. Albopictus* CCE gene family**

| Scaffold | Start  | End    | Strand | ID*              | Protein length (AA) | CCE-clade** |
|----------|--------|--------|--------|------------------|---------------------|-------------|
| 9        | 370695 | 399004 | -      | AalbCCE051       | 596                 | F           |
| 9        | 432132 | 434121 | +      | AalbCCE052       | 570                 | F           |
| 9        | 461404 | 485427 | -      | AalbCCE053       | 584                 | F           |
| 9        | 522453 | 524310 | +      | AalbCCE054       | 557                 | F           |
| 178      | 68924  | 71150  | -      | AalbCCE012       | 615                 | B           |
| 178      | 81152  | 83245  | +      | AalbCCE013       | 551                 | B           |
| 178      | 85506  | 87385  | -      | AalbCCE014       | 548                 | B           |
| 178      | 104197 | 111643 | -      | AalbCCE015       | 555                 | B           |
| 178      | 111851 | 121778 | +      | AalbCCE016       | 560                 | B           |
| 178      | 122194 | 131147 | -      | AalbCCE017       | 553                 | B           |
| 244      | 281931 | 287717 | +      | AalbCCE060       | 857                 | M           |
| 259      | 428540 | 436410 | -      | AalbCCE025       | 577                 | H           |
| 259      | 459337 | 461615 | +      | AalbCCE026       | 590                 | H           |
| 259      | 473843 | 475855 | +      | AalbCCEpseudo004 | 568                 | H           |
| 259      | 485909 | 488352 | -      | AalbCCEpseudo005 | 589                 | H           |
| 259      | 499168 | 501304 | +      | AalbCCE027       | 573                 | H           |
| 295      | 57311  | 75495  | -      | AalbCCE028.1     | 539                 | C           |
| 295      | 57311  | 75495  | -      | AalbCCE028.2     | 540                 | C           |
| 295      | 75533  | 77789  | +      | AalbCCE029       | 540                 | C           |
| 329      | 398872 | 417138 | +      | AalbCCE031       | 702                 | J           |
| 388      | 137554 | 139564 | +      | AalbCCE032       | 571                 | H           |
| 388      | 142409 | 144259 | -      | AalbCCE033       | 553                 | H           |
| 490      | 24007  | 25936  | -      | AalbCCE037       | 584                 | H           |
| 490      | 26283  | 36683  | -      | AalbCCE038       | 586                 | H           |
| 512      | 34865  | 35482  | -      | CCE fragment     |                     |             |
| 512      | 132739 | 194130 | +      | AalbCCE061       | 1258                | L           |
| 515      | 293330 | 320845 | -      | AalbCCE040       | 596                 | F           |
| 515      | 351375 | 353348 | +      | AalbCCE041       | 570                 | F           |
| 515      | 363037 | 378577 | -      | AalbCCE042       | 583                 | F           |
| 515      | 387519 | 390084 | +      | AalbCCE043       | 558                 | F           |
| 545      | 624161 | 624529 | +      | CCE fragment     |                     |             |
| 615      | 153435 | 191730 | -      | AalbCCE062       | 994                 | K           |
| 659      | 123827 | 125710 | -      | AalbCCE048       | 567                 | G           |
| 677      | 19380  | 21209  | +      | AalbCCE049       | 580                 | B           |
| 730      | 5326   | 33189  | -      | CCE fragment     |                     |             |
| 958      | 191521 | 199298 | -      | AalbCCE056       | 577                 | H           |

|      |        |        |   |                                                                                 |     |   |
|------|--------|--------|---|---------------------------------------------------------------------------------|-----|---|
| 958  | 207230 | 209235 | + | AalbCCE057                                                                      | 590 | H |
| 958  | 220290 | 222265 | + | AalbCCEpseudo007                                                                | 568 | H |
| 958  | 243294 | 245252 | - | AalbCCEpseudo008                                                                | 582 | H |
| 1080 | 176972 | 185571 | + | AalbCCE001                                                                      | 574 | B |
| 1080 | 197604 | 208597 | + | AalbCCE002                                                                      | 579 | B |
| 1080 | 215901 | 217081 |   | CCE fragment                                                                    |     |   |
| 1080 | 218032 | 225748 | - | AalbCCE003                                                                      | 576 | B |
| 1080 | 245649 | 260068 | + | AalbCCE004                                                                      | 579 | B |
| 1080 | 267526 | 268434 | - | CCE fragment                                                                    |     |   |
| 1252 | 293272 | 295512 | + | AalbCCE008                                                                      | 601 | B |
| 1256 | 51525  | 92904  | + | CCE fragment                                                                    |     |   |
| 1263 | 230931 | 233047 | - | AalbCCE009                                                                      | 601 | B |
| 1427 | 17026  | 19422  | + | AalbCCE010                                                                      | 615 | B |
| 1546 | 11747  | 12121  | - | CCE fragment                                                                    |     |   |
| 1584 | 45243  | 191201 | - | CCE fragment                                                                    |     |   |
| 1592 | 100173 | 107096 | + | AalbCCE059                                                                      | 857 | M |
| 1673 | 90538  | 90768  | + | CCE fragment                                                                    |     |   |
| 1747 | 181868 | 231823 | + | AalbCCE011                                                                      | 615 | B |
| 1886 | 96353  | 132609 | - | CCE fragment                                                                    |     |   |
| 2068 | 204830 | 206574 | - | AalbCCE018                                                                      | 561 | B |
| 2068 | 207451 | 209228 | - | AalbCCE019                                                                      | 561 | B |
| 2068 | 214027 | 215771 | - | AalbCCE020                                                                      | 561 | B |
| 2068 | 215893 | 217798 | - | AalbCCE021                                                                      | 564 | B |
| 2068 | 218050 | 219867 | - | AalbCCE022                                                                      | 561 | B |
| 2068 | 221411 | 223173 | + | AalbCCE023                                                                      | 557 | B |
| 2183 | 233599 | 234438 | - | CCE fragment                                                                    |     |   |
| 2304 | 102321 | 104287 | - | AalbCCE024                                                                      | 590 | G |
| 2392 | 17088  | 47716  | + | CCE fragment                                                                    |     |   |
| 2560 | 191674 | 207927 | - | CCE fragment                                                                    |     |   |
| 2597 | 2018   | 207927 | + | CCE fragment                                                                    |     |   |
| 2597 | 2029   | 77006  | + | AalbCCE101, combined with CCE fragment at scaffold 8766 to be a full length CCE | 635 | J |
| 3220 | 51476  | 53292  | - | AalbCCE030                                                                      | 564 | G |
| 3838 | 104646 | 169491 | + | CCE fragment                                                                    |     |   |
| 4104 | 27723  | 73199  | + | AalbCCE034                                                                      | 588 | E |
| 4123 | 163006 | 164787 | + | AalbCCE035                                                                      | 554 | D |
| 4281 | 94173  | 96165  | - | AalbCCE036                                                                      | 568 | G |
| 4610 | 65009  | 65239  | - | CCE fragment                                                                    |     |   |
| 5134 | 107645 | 109473 | + | AalbCCE039                                                                      | 571 | F |
| 5214 | 15869  | 46905  | - | CCE fragment                                                                    |     |   |

|        |        |        |   |                  |     |   |
|--------|--------|--------|---|------------------|-----|---|
| 5509   | 3634   | 23542  | + | AalbCCE044       | 571 | B |
| 5509   | 30871  | 42237  | - | AalbCCEpseudo006 | 570 | B |
| 5509   | 58362  | 74063  | + | AalbCCE045       | 576 | B |
| 5509   | 82861  | 93286  | - | AalbCCE046       | 579 | B |
| 5509   | 103971 | 117103 | - | AalbCCE047       | 579 | B |
| 5520   | 15364  | 16434  | - | CCE fragment     |     |   |
| 5667   | 63945  | 64462  | + | CCE fragment     |     |   |
| 6084   | 61881  | 112969 | + | CCE fragment     |     |   |
| 6107   | 76999  | 77580  | + | CCE fragment     |     |   |
| 7808   | 15695  | 18473  | + | CCE fragment     |     |   |
| 8124   | 46074  | 47558  | - | AalbCCE050       | 494 | I |
| 8766   | 15042  | 15328  | - | CCE fragment     |     |   |
| 9171   | 7499   | 29685  | + | AalbCCE055       | 551 | G |
| 9749   | 3875   | 5834   | + | AalbCCE058       | 594 | G |
| 10244  | 8434   | 16980  | + | CCE fragment     |     |   |
| 10749  | 34987  | 35640  | + | CCE fragment     |     |   |
| 10871  | 42761  | 47562  | - | AalbCCEpseudo002 | 769 | M |
| 10890  | 18398  | 19882  | - | AalbCCE005       | 494 | I |
| 11454  | 32920  | 35171  | - | CCE fragment     |     |   |
| 11731  | 28071  | 30275  | + | AalbCCE006       | 637 | I |
| 11878  | 36744  | 37809  | + | CCE fragment     |     |   |
| 12092  | 180    | 2128   | + | AalbCCE007       | 565 | E |
| 12635  | 35819  | 36256  | + | CCE fragment     |     |   |
| 13769  | 23416  | 25789  | - | CCE fragment     |     |   |
| 13769  | 16191  | 25785  | - | AalbCCE100       | 622 | J |
| 13788  | 4556   | 6741   | + | AalbCCEpseudo003 | 592 | B |
| 15393  | 2910   | 3347   | + | CCE fragment     |     |   |
| 23048  | 158    | 1478   | - | CCE fragment     |     |   |
| 25012  | 772    | 960    | - | CCE fragment     |     |   |
| 238980 | 3      | 215    | + | CCE fragment     |     |   |

\* if the same gene ID is followed by ".#" where # is a number, alternative spliced isoforms can be produced from the same locus

\*\* according to the phylogenetic analysis performed in this study
