# Supplementary material
Source: PubMed Central journal article supplement (PMC4640774)
Supplement: pnas.1516410112.sd15.pdf [file pnas.1516410112.sd15.pdf]

**Table S5-5. Accession numbers of CCE sequences used for phylogenetic analysis**

| <i>Ae. albopictus</i> | <i>Ae. aegypti</i>      | <i>An. gambiae</i>        | <i>D. melanogaster</i>         |
|-----------------------|-------------------------|---------------------------|--------------------------------|
| AalbCCE001            | AAEL000511-RA ACE1      | AGAP000466-RA ACE2        | DmelFBpp0070594 CG6414-PA      |
| AalbCCE002            | AAEL000530-RA CCEunkn   | AGAP001101-RA COEBE2O     | DmelFBpp0071604 clt-PA         |
| AalbCCE003            | AAEL000545-RA CCEunkn   | AGAP001356-RA ACE1        | DmelFBpp0071746 CG6018-PA      |
| AalbCCE004            | AAEL000546-RA CCEunkn   | AGAP001722-RA             | DmelFBpp0072195 CG10339-PA     |
| AalbCCE005            | AAEL000862-RA CCEglt2G  | AGAP001723-RA COEAE1A     | DmelFBpp0075081 Nrt-PB         |
| AalbCCE006            | AAEL000889-RA CCEglt1G  | AGAP002090-RA COE16738    | DmelFBpp0075735 Est-6-PA       |
| AalbCCE007            | AAEL000898-RA CCEglt4H  | AGAP002391-RA COEAE5O     | DmelFBpp0075736 Est-P-PA       |
| AalbCCE008            | AAEL000904-RA CCEglt2H  | AGAP002863-RA COEAE6O     | DmelFBpp0077586 CG5397-PA      |
| AalbCCE009            | AAEL000905-RA CCEglt3H  | AGAP003115-RA COE2580     | DmelFBpp0078010 Est-Q-PA       |
| AalbCCE010            | AAEL000918-RA CCEglt1H  | AGAP003568-RA COE22933    | DmelFBpp0078972 Nlg2-PA        |
| AalbCCE011            | AAEL001517-RA CCEunkn   | AGAP003570-RA             | DmelFBpp0079331 Glt-PA         |
| AalbCCE012            | AAEL002367-RA CCEAE1B   | AGAP005370-RA COEBE4C     | DmelFBpp0079353 CG9289-PA      |
| AalbCCE013            | AAEL002376              | AGAP005371-RA COEBE2C     | DmelFBpp0079354 CG9287-PA      |
| AalbCCE014            | AAEL002378-RA CCEAE4B   | AGAP005372-RA COEBE3C     | DmelFBpp0079434 CG3841-PA      |
| AalbCCE015            | AAEL002385-RA CCEAE3B   | AGAP005373-RA COEBE1C     | DmelFBpp0080324 Gli-PA         |
| AalbCCE016            | AAEL002391-RA CCEAE5B   | AGAP005644-RA Neurotactin | DmelFBpp0081064 alpha-Est2-PA  |
| AalbCCE017            | AAEL003129-RA neuroigin | AGAP005756-RA COEAE1D     | DmelFBpp0081065 Nlg1-PD        |
| AalbCCE018            | AAEL003181-RA CCEAE3C   | AGAP005757-RA COEAE2E     | DmelFBpp0081068 alpha-Est1-PA  |
| AalbCCE019            | AAEL003187-RA CCEAE4C   | AGAP005758-RA COEAE3D     | DmelFBpp0081069 alpha-Est3-PA  |
| AalbCCE020            | AAEL003195-RA CCEAE1C   | AGAP005833-RA COEJHE1E    | DmelFBpp0081070 alpha-Est4-PA  |
| AalbCCE021            | AAEL003196-RA CCEAE2C   | AGAP005834-RA COEJHE2E    | DmelFBpp0081071 alpha-Est5-PA  |
| AalbCCE022            | AAEL003198-RA CCEAE6C   | AGAP005835-RA COEJHE3E    | DmelFBpp0081073 alpha-Est6-PA  |
| AalbCCE023            | AAEL003201-RA CCEAE5C   | AGAP005836-RA COEJHE4E    | DmelFBpp0081074 alpha-Est7-PA  |
| AalbCCE024            | AAEL003545-RA           | AGAP005837-RA COEJHE5E    | DmelFBpp0081077 alpha-Est8-PA  |
| AalbCCE025            | AAEL004022              | AGAP006227-RA alpha       | DmelFBpp0081815 CG4757-PA      |
| AalbCCE026            | AAEL004323-RA CCEJHE2O  | AGAP006228-RA COEAE2F     | DmelFBpp0082248 Ace-PA         |
| AalbCCE027            | AAEL004341-RA CCEAE1O   | AGAP006700-RA COEAE8O     | DmelFBpp0086361 Jhedup-PA      |
| AalbCCE028.1          | AAEL004357-RA neuroigin | AGAP006723-RA COEAE2G     | DmelFBpp0086362 Jhe-PA         |
| AalbCCE028.2          | AAEL004724-RA CCEunkn   | AGAP006724-RA COEAE3G     | DmelFBpp0086625 CG12869-PA     |
| AalbCCE029            | AAEL005101-RA CCEAE4A   | AGAP006725-RA COEAE3H     | DmelFBpp0113027 CG4382-PB      |
| AalbCCE030            | AAEL005112-RA CCEAE3A   | AGAP006726-RA COEAE5G     | DmelFBpp0288391 alpha-Est10-PB |
| AalbCCE031            | AAEL005113-RB CCEAE1A   | AGAP006727-RA COEAE6G     | DmelFBpp0290296 Nlg4-PB        |

|                  |                           |                          |                               |
|------------------|---------------------------|--------------------------|-------------------------------|
| AalbCCE032       | AAEL005122-RA CCEAE6A     | AGAP006728-RA COEAE7G    | DmelFBpp0291551 alpha-Est9-PD |
| AalbCCE033       | AAEL005123-RA CCEAE5A     | AGAP006956-RA COE100     | DmelFBpp0308684 CG10175-PD    |
| AalbCCE034       | AAEL005178                | AGAP008190-RA gliotactin |                               |
| AalbCCE035       | AAEL005182-RA CCEJHE4F    | AGAP010390-RA COE120     |                               |
| AalbCCE036       | AAEL005198-RA CCEJHE2F    | AGAP010911-RA COE09895   |                               |
| AalbCCE037       | AAEL005200-RA CCEJHE1F    | AGAP010915-RA COE09941   |                               |
| AalbCCE038       | AAEL005210-RA CCEJHE3F    | AGAP010917-RA COE09916   |                               |
| AalbCCE039       | AAEL006097-RA CCEglt1K    | AGAP011365-RA COE21998   |                               |
| AalbCCE040       | AAEL006101-RA CCEglt1J    | AGAP011366-RA COE18026   |                               |
| AalbCCE041       | AAEL006104-RA CCEglt2K    | AGAP011507-RA COE130     |                               |
| AalbCCE042       | AAEL007486-RA CCEAE20     | AGAP011509-RA COEunkn    |                               |
| AalbCCE043       | AAEL008532-RA CCEunkn     | AGAP011575-RA COE150     |                               |
| AalbCCE044       | AAEL008757-RA CCEunkn     | AGAP011916-RA COEB6582   |                               |
| AalbCCE045       | AAEL009055-RA gliotactin  | AGAP013509-RA COE        |                               |
| AalbCCE046       | AAEL009240-RA neurotactin |                          |                               |
| AalbCCE047       | AAEL010389-RA CCEAE2D     |                          |                               |
| AalbCCE048       | AAEL011944-RA CCEAE30     |                          |                               |
| AalbCCE049       | AAEL012141-RA ACE2        |                          |                               |
| AalbCCE050       | AAEL012509-RA CCEBE2O     |                          |                               |
| AalbCCE051       | AAEL012886-RA CCEBE1O     |                          |                               |
| AalbCCE052       | AAEL014303-RA neuroigin   |                          |                               |
| AalbCCE053       | AAEL015072                |                          |                               |
| AalbCCE054       | AAEL015264-RA CCEAE6A     |                          |                               |
| AalbCCE055       | AAEL015578-RA CCEAE1D     |                          |                               |
| AalbCCE056       | AAEL015590-RA CCEJHE1O    |                          |                               |
| AalbCCE057       | AAEL017225-RA CCEglt2J    |                          |                               |
| AalbCCE058       | AAEL017553-RA CCEAE2B     |                          |                               |
| AalbCCE059       |                           |                          |                               |
| AalbCCE060       |                           |                          |                               |
| AalbCCE061       |                           |                          |                               |
| AalbCCE062       |                           |                          |                               |
| AalbCCE100       |                           |                          |                               |
| AalbCCE101       |                           |                          |                               |
| AalbCCEpseudo002 |                           |                          |                               |
| AalbCCEpseudo003 |                           |                          |                               |

|                  |  |  |  |
|------------------|--|--|--|
| AalbCCEpseudo004 |  |  |  |
| AalbCCEpseudo005 |  |  |  |
| AalbCCEpseudo006 |  |  |  |
| AalbCCEpseudo007 |  |  |  |
| AalbCCEpseudo008 |  |  |  |
