# Supplementary material
Source: PubMed Central journal article supplement (PMC4640774)
Supplement: pnas.1516410112.sd16.pdf [file pnas.1516410112.sd16.pdf]

**Table S5-7. Genome coordinates of the *Ae. albopictus* GST gene family**

| Scaffold | Start  | End    | Strand | ID*             | Protein length | GST-subclass** |
|----------|--------|--------|--------|-----------------|----------------|----------------|
| 460      | 390155 | 391233 | +      | AalbGSTpseudo01 | 301            | Delta          |
| 747      | 302101 | 303513 | -      | AalbGST030      | 218            | Other          |
| 802      | 241572 | 241796 | -      | GST fragment    |                |                |
| 1090     | 288614 | 309855 | -      | AalbGST028      | 227            | Theta          |
| 1152     | 134634 | 162049 | +      | AalbGST032      | 234            | Zeta           |
| 1170     | 259175 | 105395 | +      | AalbGSTpseudo03 | 227            | Omega          |
| 1179     | 36641  | 37614  | -      | AalbGSTpseudo02 | 304            | Delta          |
| 1904     | 110267 | 111767 | +      | AalbGST005      | 249            | Delta          |
| 1904     | 117595 | 118337 | -      | AalbGST006      | 223            | Delta          |
| 1904     | 134381 | 135211 | -      | AalbGSTpseudo04 | 208            | Delta          |
| 1904     | 135810 | 136723 | +      | AalbGST007      | 215            | Delta          |
| 1997     | 207810 | 209035 | +      | AalbGST022      | 231            | Other          |
| 2197     | 167967 | 185446 | -      | AalbGST031      | 218            | Other          |
| 2229     | 109314 | 109932 | -      | GST fragment    |                |                |
| 2535     | 95205  | 96319  | +      | AalbGST025      | 227            | Theta          |
| 2535     | 98728  | 99624  | -      | AalbGST026      | 229            | Theta          |
| 2535     | 99808  | 100714 | -      | AalbGST027      | 232            | Theta          |
| 3939     | 145967 | 147373 | -      | AalbGST023      | 231            | Other          |
| 4121     | 94767  | 134808 | +      | AalbGST029      | 227            | Theta          |
| 4704     | 183    | 563    | -      | GST fragment    |                |                |
| 4704     | 2231   | 9714   | +      | AalbGST012      | 224            | Epsilon        |
| 4704     | 21360  | 22539  | +      | AalbGST013      | 224            | Epsilon        |
| 4704     | 29407  | 30256  | +      | AalbGST014      | 223            | Epsilon        |
| 4704     | 34509  | 35312  | +      | AalbGST015      | 224            | Epsilon        |
| 4704     | 57667  | 58433  | +      | AalbGST016      | 222            | Epsilon        |
| 4704     | 58466  | 59281  | -      | AalbGSTpseudo05 | 220            | Epsilon        |
| 4704     | 65899  | 66876  | +      | AalbGST017      | 222            | Epsilon        |
| 4704     | 66917  | 68048  | +      | AalbGST018      | 220            | Epsilon        |
| 5021     | 34212  | 35282  | +      | AalbGST008      | 249            | Delta          |
| 5021     | 40748  | 41867  | -      | AalbGST009      | 223            | Delta          |
| 5021     | 48735  | 49649  | -      | AalbGST010      | 218            | Delta          |
| 5021     | 50189  | 50938  | +      | AalbGST011      | 215            | Delta          |
| 5870     | 23842  | 58409  | +      | AalbGST024.1    | 203            | Sigma          |
| 5870     | 23842  | 58409  | +      | AalbGST024.2    | 203            | Sigma          |
| 11376    | 16462  | 17318  | -      | AalbGST019      | 220            | Epsilon        |
| 14689    | 1      | 792    | +      | AalbGST020      | 206            | Epsilon        |
| 14689    | 12722  | 12892  | -      | GST fragment    |                |                |
| 14689    | 24332  | 24550  | +      | GST fragment    |                |                |
| 22969    | 2259   | 3492   | -      | AalbGST021      | 222            | Epsilon        |
| 173_0    | 373186 | 393586 | +      | AalbGST001      | 218            | Delta          |
| 173_0    | 418340 | 431390 | +      | AalbGST002.1    | 209            | Delta          |
| 173_0    | 418340 | 431390 | +      | AalbGST002.2    | 219            | Delta          |
| 173_0    | 418340 | 431390 | +      | AalbGST002.3    | 211            | Delta          |
| 173_0    | 444988 | 447023 | -      | AalbGST003      | 288            | Delta          |
| 173_0    | 469036 | 469729 | +      | AalbGST004      | 208            | Delta          |

\* if the same gene ID is followed by ".#" where # is a number, alternative spliced gene isoforms can be produced from the same locus

\*\* according to the phylogenetic analysis performed in this study
