# Supplementary material
Source: PubMed Central journal article supplement (PMC4640774)
Supplement: pnas.1516410112.sd17.pdf [file pnas.1516410112.sd17.pdf]

**Table S5-8. Accession numbers of GST sequences used for phylogenetic analysis**

| <i>Ae. albopictus</i> | <i>Ae. aegypti</i>   | <i>An. gambiae</i>   | <i>D. melanogaster</i>        |
|-----------------------|----------------------|----------------------|-------------------------------|
| AalbGST001            | AAEL000092-RA GSTX1  | AGAP000761-RA GSTT1  | DmelFBpp0072341 GstE12-PA     |
| AalbGST002.1          | AAEL001054-RA GSTD4  | AGAP000888-RA GSTT2  | DmelFBpp0073609 GstT4-PA      |
| AalbGST002.2          | AAEL001059-RA GSTD3  | AGAP000947-RA GSTU1  | DmelFBpp0076348 GstO3-PA      |
| AalbGST002.3          | AAEL001061-RC GSTD1  | AGAP002898-RA GSTZ1  | DmelFBpp0076349 GstO_sepia-PA |
| AalbGST003            | AAEL001071-RA GSTD5  | AGAP003257-RA GSTU2  | DmelFBpp0076376 GstO1-PA      |
| AalbGST004            | AAEL001078-RA GSTD2  | AGAP004163-RB GSTD7  | DmelFBpp0076377 GstO2-PB      |
| AalbGST005            | AAEL001090-RA GSTD7  | AGAP004164-RA GSTD1  | DmelFBpp0076378 GstO2-PA      |
| AalbGST006            | AAEL004229-RA GSTT4  | AGAP004165-RA GSTD2  | DmelFBpp0077002 GstT3-PA      |
| AalbGST007            | AAEL007946-RA GSTE6  | AGAP004171-RA GSTD8  | DmelFBpp0081520 GstZ2-PA      |
| AalbGST008            | AAEL007947-RA GSTE3  | AGAP004172-RA GSTD9  | DmelFBpp0081522 GstZ1-PA      |
| AalbGST009            | AAEL007948-RA GSTE7  | AGAP004173-RA GSTD5  | DmelFBpp0082041 GstD2-PA      |
| AalbGST010            | AAEL007951-RA GSTE2  | AGAP004378-RA GSTD11 | DmelFBpp0082042 GstD3-PA      |
| AalbGST011            | AAEL007954-RA GSTE1  | AGAP004379-RA GSTD6  | DmelFBpp0082043 GstD4-PA      |
| AalbGST012            | AAEL007955-RA GSTE8  | AGAP004380-RA GSTD12 | DmelFBpp0082044 GstD5-PA      |
| AalbGST013            | AAEL007962-RA GSTE4  | AGAP004381-RA GSTD4  | DmelFBpp0082045 GstD6-PA      |
| AalbGST014            | AAEL007964-RA GSTE5  | AGAP004382-RA GSTD3  | DmelFBpp0082046 GstD7-PA      |
| AalbGST015            | AAEL009016-RA GSTT2  | AGAP004383-RA GSTD10 | DmelFBpp0082047 GstD8-PA      |
| AalbGST016            | AAEL009017-RA GSTT1  | AGAP005749-RA GSTO1  | DmelFBpp0082048 GstD11-PA     |
| AalbGST017            | AAEL009020-RA GSTT3  | AGAP009190-RA GSTU4  | DmelFBpp0082077 GstD1-PA      |
| AalbGST018            | AAEL010500-RA GSTX2  | AGAP009191-RA GSTE6  | DmelFBpp0082078 GstD9-PA      |
| AalbGST019            | AAEL010582-RA GSTD11 | AGAP009192-RA GSTE5  | DmelFBpp0082079 GstD10-PA     |
| AalbGST020            | AAEL010591-RA GSTD6  | AGAP009193-RA GSTE4  | DmelFBpp0085850 GstE1-PA      |
| AalbGST021            | AAEL011741-RA GSTS1  | AGAP009194-RA GSTE2  | DmelFBpp0085851 GstE2-PA      |
| AalbGST022            | AAEL011752-RA GSTI1  | AGAP009195-RA GSTE1  | DmelFBpp0085852 GstE3-PA      |
| AalbGST023            | AAEL011934-RA GSTZ1  | AGAP009196-RA GSTE7  | DmelFBpp0085853 GstE4-PA      |
| AalbGST024.1          | AAEL017085-RA GSTO1  | AGAP009197-RA GSTE3  | DmelFBpp0085854 GstE5-PA      |
| AalbGST024.2          |                      | AGAP009342-RA GSTU3  | DmelFBpp0085855 GstE6-PA      |
| AalbGST025            |                      | AGAP010404-RA GSTS1  | DmelFBpp0085856 GstE7-PA      |
| AalbGST026            |                      |                      | DmelFBpp0085857 GstE8-PA      |
| AalbGST027            |                      |                      | DmelFBpp0085858 GstE9-PA      |
| AalbGST028            |                      |                      | DmelFBpp0085876 GstE11-PA     |
| AalbGST029            |                      |                      | DmelFBpp0085905 GstE10-PA     |

|                 |  |                           |
|-----------------|--|---------------------------|
| AalbGST030      |  | DmeIFBpp0086157 GstS1-PA  |
| AalbGST031      |  | DmeIFBpp0086857 GstE14-PA |
| AalbGST032      |  | DmeIFBpp0087548 GstT1-PA  |
| AalbGSTpseudo01 |  | DmeIFBpp0087549 GstT2-PA  |
| AalbGSTpseudo02 |  | DmeIFBpp0087660 GstE13-PA |
| AalbGSTpseudo03 |  |                           |
| AalbGSTpseudo04 |  |                           |
| AalbGSTpseudo05 |  |                           |
