# Supplementary material
Source: PubMed Central journal article supplement (PMC4640774)
Supplement: pnas.1516410112.sd18.pdf [file pnas.1516410112.sd18.pdf]

**Table S5-10. Genome coordinates of the *Ae. aegypti* ABC transporter gene family**

| Supercont1. | Start   | End     | Strand | ID*          | VectorBase ID**          | length (nt) | Incl. in phyl. analysis? | ABC Subfamily*** |
|-------------|---------|---------|--------|--------------|--------------------------|-------------|--------------------------|------------------|
| 8           | 3711414 | 3730662 | +      | AaegABC051   | AAEL000434_un            | 2082        | YES                      | B_FT             |
| 23          | 2940742 | 2962095 | -      | AaegABC020   | AAEL001101_un            | 2685        | YES                      | F                |
| 46          | 792391  | 818527  | -      | AaegABC037   | AAEL001938_un            | 5022        | YES                      | A                |
| 58          | 1203051 | 1220772 | -      | AaegABC077   | AAEL002468_ed            | 2122        | YES                      | B_FT             |
| 71          | 1617561 | 1676168 | +      | AaegABC046   | AAEL002913_ed            | 1980        | YES                      | D                |
| 71          | 816675  | 879820  | -      | AaegABC045   | AAEL016999_un            | 2079        | YES                      | G                |
| 94          | 984346  | 994398  | -      | AaegABC052   | AAEL003703_ed            | 1851        | YES                      | G                |
| 115         | 232898  | 271476  | +      | AaegABC002   | AAEL004331_ed            | 5523        | YES                      | A                |
| 129         | 974609  | 1032715 | +      | AaegABC005   | AAEL004743_ed            | 4572        | YES                      | C                |
| 136         | 297772  | 304685  | -      | AaegABC006   | AAEL018040_ed            | 5880        | YES                      | A                |
| 139         | 1140111 | 1145559 | +      | AaegABC007   | AAEL005043_un            | 4503        | YES                      | C                |
| 139         | 1168407 | 1184363 | +      | AaegABC008   | AAEL005026_un            | 4155        | YES                      | C                |
| 139         | 1184563 | 1195380 | -      | AaegABC009   | AAEL005045_un            | 4545        | YES                      | C                |
| 139         | 1233513 | 1252972 | -      | AaegABC010   | AAEL005030_un            | 4191        | YES                      | C                |
| 147         | 1145202 | 1176150 | +      | AaegABC011.1 | AAEL018334_ed            | 2175        | YES                      | H                |
| 159         | 901905  | 920193  | +      | AaegABC014   | AAEL005491_un            | 2352        | YES                      | H                |
| 160         | 1362499 | 1382436 | -      | AaegABC074   | AAEL005499_un            | 3873        | YES                      | C                |
| 180         | 663880  | 682626  | -      | AaegABC015   | AAEL005918_ed            | 3582        | YES                      | C                |
| 180         | 711724  | 765986  | +      | AaegABC016   | AAEL005937_un            | 4167        | YES                      | C                |
| 180         | 786121  | 801780  | +      | AaegABC017   | AAEL005929_ed            | 4260        | YES                      | C                |
| 213         | 843870  | 915438  | +      | AaegABC024   | AAEL006622_un            | 4599        | YES                      | C                |
| 219         | 178154  | 203843  | -      | AaegABC018   | AAEL006717-PA_un         | 2205        | YES                      | B_HT             |
| 225         | 1494117 | 1541300 | -      | AaegABC019   | AAEL017188_un            | 1845        | YES                      | G                |
| 302         | 73729   | 107503  | +      | AaegABC021   | AAEL008134_un            | 2547        | YES                      | B_HT             |
| 303         | 395730  | 432830  | +      | AaegABC022   | AAEL008138_un            | 2520        | YES                      | G                |
| 321         | 644598  | 665708  | -      | AaegABC025   | AAEL008388_un            | 5001        | YES                      | A                |
| 321         | 675803  | 730927  | -      | AaegABC026   | AAEL008386+AAEL008384_ed | 7839        | YES                      | A                |
| 337         | 23491   | 61091   | -      | AaegABC027   | AAEL008624_un            | 1782        | YES                      | G                |
| 337         | 68434   | 84226   | -      | AaegABC028   | AAEL008632_un            | 1824        | YES                      | G                |
| 337         | 89533   | 100557  | -      | AaegABC029   | AAEL008628_un            | 1758        | YES                      | G                |
| 337         | 119965  | 131014  | +      | AaegABC030   | AAEL008625_ed            | 1548        | YES                      | G                |
| 337         | 131034  | 170086  | -      | AaegABC031   | AAEL008629_ed            | 1731        | YES                      | G                |
| 337         | 276979  | 394542  | -      | AaegABC032   | AAEL008631_ed            | 2181        | YES                      | G                |
| 337         | 470559  | 524852  | -      | AaegABC033   | AAEL008635_ed            | 2031        | YES                      | G                |
| 340         | 435172  | 469513  | +      | AaegABC034   | AAEL008672_ed            | 2100        | YES                      | G                |
| 449         | 843528  | 895566  | +      | AaegABC035   | AAEL010047_un            | 2262        | YES                      | D                |

|      |         |         |   |              |               |      |                                   |      |
|------|---------|---------|---|--------------|---------------|------|-----------------------------------|------|
| 450  | 713084  | 727146  | + | AaegABC036   | AAEL010059_un | 1830 | YES                               | E    |
| 473  | 244386  | 260577  | + | AaegABC038   | AAEL010359_un | 2139 | YES                               | F    |
| 474  | 313030  | 327570  | + | AaegABC039   | AAEL010379_ed | 3825 | YES                               | B_FT |
| 529  | 122846  | 144067  | - | AaegABC040   | AAEL010977_un | 1809 | YES                               | F    |
| 561  | 159735  | 160869  | - | AaegABC064   | AAEL011269_ed | 1011 | YES, combined with AaegABC065     | G    |
| 561  | 478687  | 481728  | + | AaegABC078   | AAEL011265_ed | 2369 | YES                               | G    |
| 624  | 277315  | 344956  | - | AaegABC041   | AAEL011863_ed | 1833 | YES                               | G    |
| 662  | 14644   | 15443   | + | AaegABC065   | AAEL012170_ed | 743  | YES                               | G    |
| 664  | 666732  | 670973  | - | AaegABC042   | AAEL012192_ed | 4041 | YES                               | C    |
| 688  | 67827   | 73302   | - | AaegABC043   | AAEL012395_un | 4074 | YES                               | C    |
| 688  | 87144   | 91714   | + | AaegABC044   | AAEL012386_ed | 4056 | YES                               | C    |
| 726  | 371337  | 377728  | + | AaegABC047   | AAEL012702_un | 4911 | YES                               | A    |
| 726  | 388899  | 394375  | + | AaegABC048   | AAEL012700_un | 4947 | YES                               | A    |
| 726  | 409854  | 439050  | + | AaegABC049   | AAEL012701_un | 4869 | YES                               | A    |
| 726  | 450626  | 459977  | + | AaegABC050   | AAEL012698_ed | 4929 | YES                               | A    |
| 806  | 207228  | 229622  | - | AaegABC068   | AAEL013215_ed | 1312 | YES, included because partial SUR | C    |
| 936  | 291553  | 352794  | - | AaegABC071   | AAEL013834_ed | 3918 | YES                               | C    |
| 936  | 247584  | 261542  | - | AaegABC080   | AAEL013833_ed | 3244 | YES                               | C    |
| 941  | 98439   | 197674  | - | AaegABC053   | AAEL018267_ed | 4086 | YES                               | C    |
| 1111 | 126773  | 184929  | + | AaegABC001   | AAEL014428_ed | 2184 | YES                               | H    |
| 1174 | 142657  | 146020  | - | AaegABC003   | AAEL017106_ed | 2061 | YES                               | G    |
| 1224 | 80764   | 141582  | - | AaegABC004   | AAEL014699_un | 4908 | YES                               | A    |
| 1520 | 51863   | 59657   | - | AaegABC073   | AAEL015146_ed | 4668 | YES                               | A    |
| 8    | 4773940 | 4775057 | + | AaegABC066   | -             | 414  | NO                                | C    |
| 62   | 2794723 | 2795682 | - | AaegABC079   | AAEL018012_ed | 847  | NO                                | A    |
| 107  | 820177  | 825969  | - | AaegABC076   | AAEL017209_ed | 2912 | NO                                | C    |
| 147  | 1145202 | 1186647 | + | AaegABC011.2 | AAEL018334_ed | 2175 | NO                                | H    |
| 147  | 1200546 | 1201305 | + | AaegABC075   | AAEL005253_un | 699  | NO                                | H    |
| 176  | 1627179 | 1629855 | - | AaegABC081   | AAEL017572_ed | 1723 | NO                                | A    |
| 337  | 9155    | 10003   | - | AaegABC061   | AAEL008627_ed | 792  | NO                                | G    |
| 664  | 689147  | 690012  | + | AaegABC067   | AAEL012189_ed | 801  | NO                                | C    |
| 830  | 262946  | 301304  | + | AaegABC069   | AAEL013372_ed | 1458 | NO                                | G    |
| 871  | 281423  | 308617  | + | AaegABC054   | AAEL013567_ed | 2907 | NO                                | C    |
| 871  | 315467  | 317246  | + | AaegABC070   | AAEL013567_ed | 1290 | NO                                | C    |
| 975  | 289068  | 289939  | - | AaegABC072   | -             | 808  | NO                                | G    |
| 1078 | 245220  | 245599  | - | AaegABC055   | -             | 288  | NO                                | B_FT |
| 1442 | 8853    | 20230   | - | AaegABC056   | AAEL015067_ed | 1704 | NO                                | C    |
| 1520 | 36861   | 38109   | - | AaegABC057   | -             | 1065 | NO                                | A    |
| 1719 | 47995   | 49750   | + | AaegABC058   | AAEL015290_ed | 1219 | NO                                | C    |

|      |      |      |   |            |               |      |    |   |
|------|------|------|---|------------|---------------|------|----|---|
| 3196 | 954  | 3960 | + | AaegABC059 | AAEL015551_ed | 866  | NO | H |
| 3224 | 2394 | 3205 | + | AaegABC060 | -             | 620  | NO | D |
| 4135 | 1018 | 2838 | + | AaegABC062 | AAEL015644_ed | 1759 | NO | C |
| 4629 | 1694 | 2906 | - | AaegABC063 | AAEL015670_ed | 483  | NO | G |

\* if the same gene ID is followed by ".#" where # is a number, alternative spliced isoforms can be produced from the same locus

\*\* "un(edited)" means that the Vectorbase annotation had not to be changed, in contrast to "ed(ited)"

\*\*\* based on BLASTp search against *D. melanogaster* ABC proteins; B-FT = ABCB full transporter; B\_HT=ABCB half-transporter
