# Supplementary material
Source: PubMed Central journal article supplement (PMC4640774)
Supplement: pnas.1516410112.sd19.pdf [file pnas.1516410112.sd19.pdf]

**Table S5-11. Genome coordinates of the *Ae.albopictus* ABC transporter gene family**

| Scaffold | Start  | End    | Strand | ID          | Protein length | Incl. in phyl. analysis?          | ABC Subfamily* |
|----------|--------|--------|--------|-------------|----------------|-----------------------------------|----------------|
| 53       | 270857 | 274610 | +      | CCG019768.1 | 623            | YES                               | H              |
| 66       | 196264 | 238222 | -      | CCG022692.1 | 728            | YES                               | H              |
| 82       | 392918 | 427185 | +      | CCG025850.1 | 1401           | YES                               | C              |
| 82       | 429863 | 469378 | +      | CCG025851.1 | 1575           | YES                               | C              |
| 82       | 474687 | 488345 | -      | AalbABC008  | 1365           | YES                               | C              |
| 82       | 512460 | 522164 | -      | AalbABC009  | 1504           | YES                               | C              |
| 110      | 129776 | 163443 | +      | CCG001378.1 | 1401           | YES                               | C              |
| 123      | 42950  | 75993  | -      | CCG003003.1 | 692            | YES                               | G              |
| 218      | 241206 | 266983 | +      | CCG009768.1 | 742            | YES                               | B_HT           |
| 230      | 285457 | 308054 | -      | CCG010258.1 | 678            | YES                               | G              |
| 400      | 415066 | 463337 | -      | CCG016086.2 | 521            | YES, included because partial SUR | C              |
| 429      | 333287 | 342293 | -      | CCG016930.1 | 1641           | YES                               | A              |
| 429      | 371552 | 389383 | -      | CCG016931.2 | 1547           | YES                               | A              |
| 429      | 397928 | 407132 | -      | CCG016932.1 | 1626           | YES                               | A              |
| 429      | 426324 | 431779 | -      | AalbABC007  | 1637           | YES                               | A              |
| 429      | 437895 | 451203 | -      | CCG016933.1 | 1637           | YES                               | A              |
| 481      | 1156   | 33879  | +      | CCG018349.1 | 576            | YES                               | G              |
| 481      | 33880  | 43958  | -      | AalbABC011  | 522            | YES                               | G              |
| 481      | 61300  | 72857  | +      | CCG018350.1 | 587            | YES                               | G              |
| 481      | 82076  | 127043 | +      | CCG018351.1 | 616            | YES                               | G              |
| 551      | 240810 | 267403 | -      | CCG020313.2 | 1524           | YES                               | C              |
| 672      | 379932 | 394110 | -      | CCG022957.1 | 1961           | YES                               | A              |
| 680      | 34823  | 73197  | -      | CCG023127.1 | 569            | YES                               | G              |
| 684      | 190732 | 205935 | +      | CCG023213.1 | 690            | YES                               | B_HT           |
| 782      | 14877  | 16679  | -      | CCG025183.1 | 518            | YES                               | G              |
| 858      | 60196  | 75892  | -      | CCG026446.1 | 891            | YES                               | G              |
| 892      | 23308  | 40148  | +      | CCG026987.1 | 713            | YES                               | F              |
| 982      | 217483 | 227261 | -      | CCG028396.1 | 580            | YES                               | G              |
| 982      | 240303 | 247916 | -      | CCG028397.2 | 595            | YES                               | G              |
| 982      | 281439 | 291309 | -      | AalbABC010  | 607            | YES                               | G              |
| 1027     | 183223 | 191969 | -      | CCG000392.1 | 1274           | YES                               | B_FT           |
| 1243     | 217501 | 261645 | -      | CCG003172.1 | 659            | YES                               | D              |
| 1266     | 20301  | 74003  | +      | CCG003415.1 | 676            | YES                               | G              |
| 1266     | 135970 | 247363 | +      | CCG003416.1 | 732            | YES                               | G              |
| 1299     | 95247  | 154632 | -      | CCG003816.1 | 676            | YES                               | G              |
| 1340     | 13541  | 50522  | -      | CCG004226.1 | 604            | YES                               | G              |

|        |        |        |   |             |      |                                |      |
|--------|--------|--------|---|-------------|------|--------------------------------|------|
| 1579   | 203126 | 205809 | + | CCG006376.1 | 728  | YES                            | B_HT |
| 1666   | 231530 | 242183 | + | CCG007028.1 | 1503 | YES                            | C    |
| 1666   | 257611 | 271004 | + | AalbABC003  | 1370 | YES                            | C    |
| 1666   | 271218 | 276098 | - | AalbABC004  | 1517 | YES                            | C    |
| 1994   | 7868   | 23216  | - | AalbABC005  | 783  | YES                            | H    |
| 2235   | 123822 | 154000 | - | CCG010006.1 | 621  | YES                            | G    |
| 2404   | 207949 | 215282 | - | CCG010651.1 | 1689 | YES                            | A    |
| 2408   | 162989 | 177025 | - | CCG010663.1 | 847  | YES                            | B_HT |
| 3175   | 27877  | 30113  | - | CCG013515.1 | 624  | YES                            | E    |
| 3375   | 157323 | 176897 | - | CCG014205.1 | 1861 | YES                            | A    |
| 3472   | 31665  | 66056  | + | CCG014561.1 | 1098 | YES                            | C    |
| 3490   | 25963  | 41943  | - | AalbABC006  | 868  | YES                            | G    |
| 3525   | 128772 | 163152 | - | CCG014705.1 | 1673 | YES                            | A    |
| 3668   | 26024  | 58408  | - | CCG015143.1 | 727  | YES                            | H    |
| 4013   | 42293  | 67705  | - | CCG016142.2 | 1422 | YES                            | C    |
| 4013   | 78622  | 116281 | - | CCG016143.1 | 1389 | YES                            | C    |
| 4554   | 13472  | 32971  | + | CCG017683.1 | 1190 | YES                            | C    |
| 4631   | 111061 | 122448 | - | CCG017876.1 | 713  | YES                            | F    |
| 4957   | 13572  | 30451  | - | CCG018772.1 | 656  | YES                            | D    |
| 5068   | 126482 | 136630 | + | CCG019098.1 | 605  | YES                            | F    |
| 5433   | 102742 | 112033 | - | CCG020100.1 | 1648 | YES                            | A    |
| 6029   | 15874  | 73665  | - | CCG021530.1 | 598  | YES                            | G    |
| 6527   | 84062  | 97020  | - | CCG022541.1 | 1291 | YES                            | C    |
| 6739   | 10685  | 26620  | - | CCG022988.1 | 2576 | YES                            | A    |
| 6872   | 39928  | 42687  | - | CCG023304.1 | 882  | YES                            | F    |
| 7113   | 18816  | 23022  | + | CCG023783.1 | 1334 | YES                            | C    |
| 7113   | 28498  | 32980  | + | CCG023784.1 | 1341 | YES                            | C    |
| 7946   | 4985   | 7324   | + | CCG025406.1 | 738  | YES                            | G    |
| 8966   | 27806  | 64302  | + | CCG027071.1 | 1181 | YES                            | C    |
| 9335   | 16004  | 59328  | - | CCG027679.1 | 1637 | YES                            | A    |
| 10705  | 20884  | 45521  | + | CCG000985.1 | 410  | YES, combined with CCG007754.1 | G    |
| 11258  | 11367  | 23818  | + | CCG001707.1 | 560  | YES                            | D    |
| 15461  | 1487   | 10833  | - | CCG006139.1 | 601  | YES                            | G    |
| 17709  | 1000   | 5140   | + | CCG007754.1 | 436  | YES                            | G    |
| 23893  | 777    | 4583   | - | CCG010570.1 | 1196 | YES                            | C    |
| 1022_0 | 118842 | 125575 | + | AalbABC001  | 618  | YES                            | G    |
| 110    | 198447 | 201750 | + | CCG001379.1 | 1012 | NO                             | C    |
| 15489  | 1896   | 14480  | - | AalbABC002  | 976  | NO                             | C    |
| 174929 | 58     | 762    | - | AalbABC012  | 235  | NO                             | C    |

|       |        |        |   |             |      |    |   |
|-------|--------|--------|---|-------------|------|----|---|
| 14964 | 26989  | 27591  | + | AalbABC013  | 201  | NO | D |
| 3472  | 258    | 1312   | + | AalbABC014  | 330  | NO | C |
| 3232  | 618    | 1588   | - | AalbABC015  | 304  | NO | G |
| 1845  | 32159  | 34088  | - | AalbABC016  | 623  | NO | C |
| 1322  | 296398 | 297982 | - | CCG004072.1 | 207  | NO | G |
| 142   | 616323 | 617175 | - | CCG005047.1 | 245  | NO | C |
| 14258 | 8223   | 25179  | + | CCG005085.1 | 985  | NO | C |
| 15461 | 19309  | 20304  | - | CCG006142.1 | 193  | NO | G |
| 4851  | 3009   | 50982  | + | CCG018484.1 | 833  | NO | C |
| 5103  | 96830  | 97828  | - | CCG019201.1 | 267  | NO | G |
| 5464  | 103961 | 110667 | + | CCG020167.1 | 602  | NO | C |
| 6516  | 85156  | 99466  | + | CCG022510.1 | 939  | NO | C |
| 6516  | 102411 | 107423 | - | CCG022511.1 | 233  | NO | C |
| 66    | 184104 | 184845 | - | CCG022691.1 | 197  | NO | H |
| 7492  | 87057  | 88594  | - | CCG024536.1 | 257  | NO | C |
| 82    | 469682 | 473131 | - | CCG025852.1 | 1091 | NO | C |

\* based on BLASTp search against *D. melanogaster* ABC proteins; B-FT = ABCB full transporter; B\_HT=ABCB half-transporter
