# Supplementary material
Source: PubMed Central journal article supplement (PMC4640774)
Supplement: pnas.1516410112.sd24.pdf [file pnas.1516410112.sd24.pdf]

**Table S7.1. Transcript analysis of adult male vs adult female gene expression.**

| GeneID      | Gene_length | Male reads | Female reads | Male-RPKM  | Female-RPKM | log2 Ratio(F/M) | Up-Down-Regulation(F/M) | P-value   | FDR        | Description                                                                              |
|-------------|-------------|------------|--------------|------------|-------------|-----------------|-------------------------|-----------|------------|------------------------------------------------------------------------------------------|
| CCG008720.1 | 324         | 10         | 0            | 1.32622638 | 0.001       | -10.37311134    | Down                    | 0.0002961 | 0.00047146 | AAEL006662-PA OS=Aedes aegypti GN=AAEL006662 PE=4 SV=1                                   |
| CCG001977.1 | 372         | 10         | 0            | 1.15510039 | 0.001       | -10.17380253    | Down                    | 0.0002961 | 0.00047158 | AAEL007682-PA OS=Aedes aegypti GN=AAEL007682 PE=4 SV=1                                   |
| CCG001443.1 | 372         | 10         | 0            | 1.15510039 | 0.001       | -10.17380253    | Down                    | 0.0002961 | 0.00047155 | AAEL003256-PA OS=Aedes aegypti GN=AAEL003256 PE=4 SV=1                                   |
| CCG008172.1 | 495         | 10         | 0            | 0.86807545 | 0.001       | -9.761676626    | Down                    | 0.0002961 | 0.00047152 | -                                                                                        |
| CCG018587.1 | 513         | 10         | 0            | 0.83761666 | 0.001       | -9.710146326    | Down                    | 0.0002961 | 0.0004714  | AAEL005966-PA OS=Aedes aegypti GN=AAEL005966 PE=4 SV=1                                   |
| CCG016364.1 | 552         | 10         | 0            | 0.77843722 | 0.001       | -9.604436884    | Down                    | 0.0002961 | 0.00047143 | Putative uncharacterized protein OS=Culex quinquefasciatus GN=CpipJ_CPIJ003311 PE=4 SV=1 |
| CCG024454.1 | 617         | 10         | 0            | 0.69643006 | 0.001       | -9.443834662    | Down                    | 0.0002961 | 0.00047167 | Putative uncharacterized protein OS=Tribolium castaneum GN=TcasGA2_TC006955 PE=4 SV=1    |
| CCG006445.1 | 720         | 10         | 0            | 0.59680187 | 0.001       | -9.221108245    | Down                    | 0.0002961 | 0.00047125 | AAEL009771-PA OS=Aedes aegypti GN=AAEL009771 PE=3 SV=1                                   |
| CCG019346.1 | 726         | 10         | 0            | 0.59186962 | 0.001       | -9.209135603    | Down                    | 0.0002961 | 0.00047161 | AAEL001256-PA OS=Aedes aegypti GN=AAEL001256 PE=4 SV=1                                   |
| CCG026240.1 | 762         | 10         | 0            | 0.56390728 | 0.001       | -9.139314154    | Down                    | 0.0002961 | 0.00047128 | AAEL009564-PA OS=Aedes aegypti GN=AAEL009564 PE=4 SV=1                                   |
| CCG024932.1 | 789         | 10         | 0            | 0.54461007 | 0.001       | -9.089079851    | Down                    | 0.0002961 | 0.00047149 | AAEL011450-PA OS=Aedes aegypti GN=AAEL011450 PE=3 SV=1                                   |
| CCG001967.1 | 1140        | 10         | 0            | 0.3769275  | 0.001       | -8.558143232    | Down                    | 0.0002961 | 0.00047164 | Putative uncharacterized protein OS=Culex quinquefasciatus GN=CpipJ_CPIJ001348 PE=4 SV=1 |
| CCG009416.1 | 1200        | 10         | 0            | 0.35808112 | 0.001       | -8.484142651    | Down                    | 0.0002961 | 0.00047131 | AAEL002916-PA OS=Aedes aegypti GN=AAEL002916 PE=4 SV=1                                   |

|             |      |    |   |            |       |              |      |           |            |                                                                                          |
|-------------|------|----|---|------------|-------|--------------|------|-----------|------------|------------------------------------------------------------------------------------------|
| CCG018326.1 | 1785 | 10 | 0 | 0.2407268  | 0.001 | -7.911252982 | Down | 0.0002961 | 0.00047134 | AAEL003976-PA OS=Reedes aegypti GN=AAEL003976 PE=4 SV=1                                  |
| CCG013652.1 | 4243 | 10 | 0 | 0.10127206 | 0.001 | -6.662092378 | Down | 0.0002961 | 0.00047137 | Putative uncharacterized protein OS=Tribolium castaneum GN=TcasGA2_TC012952 PE=4 SV=1    |
| CCG011264.1 | 345  | 11 | 0 | 1.37004951 | 0.001 | -10.42001231 | Down | 0.0001328 | 0.00021562 | AAEL008251-PA OS=Reedes aegypti GN=AAEL008251 PE=4 SV=1                                  |
| CCG005571.1 | 417  | 11 | 0 | 1.1334942  | 0.001 | -10.14656129 | Down | 0.0001328 | 0.00021557 | Putative uncharacterized protein OS=Culex quinquefasciatus GN=CpipJ_CPIJ009105 PE=4 SV=1 |
| CCG021062.1 | 459  | 11 | 0 | 1.02977577 | 0.001 | -10.00811452 | Down | 0.0001328 | 0.00021559 | Putative uncharacterized protein OS=Culex quinquefasciatus GN=CpipJ_CPIJ010139 PE=4 SV=1 |
| CCG021466.1 | 488  | 11 | 0 | 0.96858008 | 0.001 | -9.919727527 | Down | 0.0001328 | 0.00021564 | -                                                                                        |
| CCG015216.1 | 534  | 11 | 0 | 0.88514435 | 0.001 | -9.789768933 | Down | 0.0001328 | 0.00021565 | AAEL000085-PA OS=Reedes aegypti GN=AAEL000085 PE=4 SV=1                                  |
| CCG008792.1 | 568  | 11 | 0 | 0.83216035 | 0.001 | -9.700717745 | Down | 0.0001328 | 0.00021566 | -                                                                                        |
| CCG016091.1 | 780  | 11 | 0 | 0.60598344 | 0.001 | -9.243134551 | Down | 0.0001328 | 0.00021561 | AAEL003311-PA OS=Reedes aegypti GN=AAEL003311 PE=4 SV=1                                  |
| CCG009792.1 | 1857 | 11 | 0 | 0.25453262 | 0.001 | -7.991706765 | Down | 0.0001328 | 0.00021558 | AGAP013374-PA OS=Anopheles gambiae GN=AgaP_AGAP013374 PE=4 SV=1                          |
| CCG017791.1 | 288  | 12 | 0 | 1.79040561 | 0.001 | -10.80607075 | Down | 5.96E-05  | 9.92E-05   | AAEL006722-PA OS=Reedes aegypti GN=AAEL006722 PE=4 SV=1                                  |
| CCG027620.1 | 420  | 12 | 0 | 1.2277067  | 0.001 | -10.26175023 | Down | 5.96E-05  | 9.91E-05   | AAEL008967-PA OS=Reedes aegypti GN=AAEL008967 PE=4 SV=1                                  |
| CCG022164.1 | 450  | 12 | 0 | 1.14585959 | 0.001 | -10.16221456 | Down | 5.96E-05  | 9.92E-05   | AAEL013722-PA OS=Reedes aegypti GN=AAEL013722 PE=4 SV=1                                  |
| CCG021342.1 | 552  | 12 | 0 | 0.93412467 | 0.001 | -9.86747129  | Down | 5.96E-05  | 9.92E-05   | AAEL012690-PA OS=Reedes aegypti GN=AAEL012690 PE=4 SV=1                                  |
| CCG011393.1 | 570  | 12 | 0 | 0.90462599 | 0.001 | -9.821177638 | Down | 5.96E-05  | 9.92E-05   | AAEL000645-PA OS=Reedes aegypti GN=AAEL000645 PE=4 SV=1                                  |

|             |      |    |   |            |       |              |      |          |          |                                                                                                   |
|-------------|------|----|---|------------|-------|--------------|------|----------|----------|---------------------------------------------------------------------------------------------------|
| CCG006007.1 | 755  | 12 | 0 | 0.68296267 | 0.001 | -9.415662913 | Down | 5.96E-05 | 9.92E-05 | Putative uncharacterized protein<br>OS=Culex quinquefasciatus<br>GN=CpipJ_CPIJ005028 PE=4<br>SV=1 |
| CCG008062.1 | 767  | 12 | 0 | 0.67227746 | 0.001 | -9.39291298  | Down | 5.96E-05 | 9.91E-05 | Putative uncharacterized protein<br>OS=Culex quinquefasciatus<br>GN=CpipJ_CPIJ018868 PE=4<br>SV=1 |
| CCG018582.1 | 819  | 12 | 0 | 0.62959318 | 0.001 | -9.298276105 | Down | 5.96E-05 | 9.92E-05 | AAEL001330-PA OS=Aedes<br>aegypti GN=AAEL001330 PE=3<br>SV=1                                      |
| CCG017551.1 | 855  | 12 | 0 | 0.60308399 | 0.001 | -9.236215137 | Down | 5.96E-05 | 9.92E-05 | AAEL009488-PA OS=Aedes<br>aegypti GN=AAEL009488 PE=4<br>SV=1                                      |
| CCG000905.1 | 856  | 12 | 0 | 0.60237946 | 0.001 | -9.234528761 | Down | 5.96E-05 | 9.92E-05 | Uncharacterized protein<br>OS=Anopheles darlingi<br>GN=AND_11211 PE=4 SV=1                        |
| CCG025374.1 | 1015 | 12 | 0 | 0.50801657 | 0.001 | -8.988731735 | Down | 5.96E-05 | 9.92E-05 | -                                                                                                 |
| CCG025421.1 | 1539 | 12 | 0 | 0.33504666 | 0.001 | -8.388218231 | Down | 5.96E-05 | 9.92E-05 | AAEL004647-PA OS=Aedes<br>aegypti GN=AAEL004647 PE=4<br>SV=1                                      |
| CCG015653.1 | 1725 | 12 | 0 | 0.29891989 | 0.001 | -8.223615101 | Down | 5.96E-05 | 9.92E-05 | AAEL014010-PA (Fragment)<br>OS=Aedes aegypti<br>GN=AAEL014010 PE=4 SV=1                           |
| CCG024944.1 | 1749 | 12 | 0 | 0.29481808 | 0.001 | -8.203681173 | Down | 5.96E-05 | 9.92E-05 | AAEL009646-PA OS=Aedes<br>aegypti GN=AAEL009646 PE=4<br>SV=1                                      |
| CCG004710.1 | 348  | 13 | 0 | 1.60519124 | 0.001 | -10.64852947 | Down | 2.67E-05 | 4.57E-05 | AAEL009000-PA OS=Aedes<br>aegypti GN=AAEL009000 PE=4<br>SV=1                                      |
| CCG007130.1 | 375  | 13 | 0 | 1.48961747 | 0.001 | -10.54072618 | Down | 2.67E-05 | 4.57E-05 | AAEL005810-PA OS=Aedes<br>aegypti GN=AAEL005810 PE=4<br>SV=1                                      |
| CCG014551.1 | 445  | 13 | 0 | 1.25529562 | 0.001 | -10.29381144 | Down | 2.67E-05 | 4.57E-05 | -                                                                                                 |
| CCG021485.1 | 630  | 13 | 0 | 0.88667706 | 0.001 | -9.792264946 | Down | 2.67E-05 | 4.57E-05 | -                                                                                                 |
| CCG028100.1 | 657  | 13 | 0 | 0.85023828 | 0.001 | -9.731723404 | Down | 2.67E-05 | 4.57E-05 | AAEL008168-PA OS=Aedes<br>aegypti GN=AAEL008168 PE=4<br>SV=1                                      |
| CCG002844.1 | 387  | 14 | 0 | 1.55446068 | 0.001 | -10.60219841 | Down | 1.20E-05 | 2.09E-05 | -                                                                                                 |
| CCG008953.1 | 663  | 14 | 0 | 0.90735488 | 0.001 | -9.825523108 | Down | 1.20E-05 | 2.09E-05 | AAEL010201-PA OS=Aedes<br>aegypti GN=AAEL010201 PE=4<br>SV=1                                      |
| CCG004917.1 | 723  | 14 | 0 | 0.83205572 | 0.001 | -9.700536331 | Down | 1.20E-05 | 2.09E-05 | -                                                                                                 |
| CCG016788.1 | 753  | 14 | 0 | 0.79890609 | 0.001 | -9.641882114 | Down | 1.20E-05 | 2.09E-05 | AAEL002234-PA OS=Aedes<br>aegypti GN=AAEL002234 PE=4<br>SV=1                                      |

|             |      |    |   |            |       |              |      |          |          |                                                                                          |
|-------------|------|----|---|------------|-------|--------------|------|----------|----------|------------------------------------------------------------------------------------------|
| CCG020823.1 | 393  | 15 | 0 | 1.64006621 | 0.001 | -10.67953834 | Down | 5.38E-06 | 9.55E-06 | -                                                                                        |
| CCG008356.1 | 438  | 15 | 0 | 1.47156625 | 0.001 | -10.52313678 | Down | 5.38E-06 | 9.55E-06 | AAEL012061-PA OS=Aedes aegypti GN=AAEL012061 PE=4 SV=1                                   |
| CCG013328.1 | 459  | 15 | 0 | 1.40423969 | 0.001 | -10.4555735  | Down | 5.38E-06 | 9.55E-06 | AAEL005034-PA OS=Aedes aegypti GN=AAEL005034 PE=3 SV=1                                   |
| CCG021896.1 | 369  | 16 | 0 | 1.86318632 | 0.001 | -10.86355624 | Down | 2.41E-06 | 4.35E-06 | AAEL003177-PA OS=Aedes aegypti GN=AAEL003177 PE=4 SV=1                                   |
| CCG006970.1 | 384  | 16 | 0 | 1.79040561 | 0.001 | -10.80607075 | Down | 2.41E-06 | 4.35E-06 | AAEL010657-PA OS=Aedes aegypti GN=AAEL010657 PE=4 SV=1                                   |
| CCG012027.1 | 414  | 16 | 0 | 1.66066607 | 0.001 | -10.69754629 | Down | 2.41E-06 | 4.35E-06 | AAEL013513-PA OS=Aedes aegypti GN=AAEL013513 PE=4 SV=1                                   |
| CCG008326.1 | 1002 | 16 | 0 | 0.68614347 | 0.001 | -9.422366453 | Down | 2.41E-06 | 4.35E-06 | AAEL009098-PA OS=Aedes aegypti GN=AAEL009098 PE=4 SV=1                                   |
| CCG027791.1 | 2109 | 16 | 0 | 0.32599135 | 0.001 | -8.348689867 | Down | 2.41E-06 | 4.35E-06 | AAEL003321-PA OS=Aedes aegypti GN=AAEL003321 PE=4 SV=1                                   |
| CCG008230.1 | 474  | 17 | 0 | 1.54110863 | 0.001 | -10.58975284 | Down | 1.08E-06 | 1.99E-06 | -                                                                                        |
| CCG001665.1 | 1071 | 17 | 0 | 0.68205928 | 0.001 | -9.413753323 | Down | 1.08E-06 | 1.99E-06 | AAEL002911-PA (Fragment) OS=Aedes aegypti GN=AAEL002911 PE=4 SV=1                        |
| CCG009531.1 | 1125 | 17 | 0 | 0.64932043 | 0.001 | -9.342786801 | Down | 1.08E-06 | 1.99E-06 | AAEL006484-PA OS=Aedes aegypti GN=GPROP3 PE=3 SV=1                                       |
| CCG027452.1 | 1170 | 17 | 0 | 0.62434657 | 0.001 | -9.286203273 | Down | 1.08E-06 | 1.99E-06 | AAEL011921-PA (Fragment) OS=Aedes aegypti GN=AAEL011921 PE=4 SV=1                        |
| CCG027833.1 | 363  | 18 | 0 | 2.13073064 | 0.001 | -11.05713251 | Down | 4.86E-07 | 9.07E-07 | AAEL017144-PA OS=Aedes aegypti PE=4 SV=1                                                 |
| CCG009213.1 | 591  | 18 | 0 | 1.30872288 | 0.001 | -10.35394393 | Down | 4.86E-07 | 9.07E-07 | AAEL009707-PA OS=Aedes aegypti GN=AAEL009707 PE=4 SV=1                                   |
| CCG012935.1 | 378  | 19 | 0 | 2.15985439 | 0.001 | -11.07671834 | Down | 2.18E-07 | 4.12E-07 | AAEL002003-PA OS=Aedes aegypti GN=AAEL002003 PE=4 SV=1                                   |
| CCG018645.1 | 552  | 19 | 0 | 1.47903072 | 0.001 | -10.5304363  | Down | 2.18E-07 | 4.12E-07 | AAEL013917-PA OS=Aedes aegypti GN=AAEL013917 PE=4 SV=1                                   |
| CCG011150.1 | 702  | 19 | 0 | 1.16299852 | 0.001 | -10.18363354 | Down | 2.18E-07 | 4.12E-07 | Putative uncharacterized protein OS=Culex quinquefasciatus GN=CpipJ_CPIJ015444 PE=4 SV=1 |

|             |      |    |   |            |       |              |      |          |          |                                                                                                                |
|-------------|------|----|---|------------|-------|--------------|------|----------|----------|----------------------------------------------------------------------------------------------------------------|
| CCG021471.1 | 588  | 20 | 0 | 1.4615556  | 0.001 | -10.513289   | Down | 9.77E-08 | 1.88E-07 | AAEL011586-PA OS=Aedes aegypti GN=AAEL011586 PE=4 SV=1                                                         |
| CCG026792.1 | 978  | 20 | 0 | 0.87872668 | 0.001 | -9.779270686 | Down | 9.77E-08 | 1.88E-07 | AAEL009463-PA (Fragment) OS=Aedes aegypti GN=AAEL009463 PE=4 SV=1                                              |
| CCG009628.1 | 981  | 20 | 0 | 0.87603944 | 0.001 | -9.774852015 | Down | 9.77E-08 | 1.88E-07 | AAEL004557-PA OS=Aedes aegypti GN=AAEL004557 PE=4 SV=1                                                         |
| CCG023064.1 | 354  | 21 | 0 | 2.54905205 | 0.001 | -11.31574512 | Down | 4.38E-08 | 8.54E-08 | Predicted protein OS=Culex quinquefasciatus GN=CpipJ_CPIJ015505 PE=4 SV=1                                      |
| CCG016431.1 | 468  | 21 | 0 | 1.92812912 | 0.001 | -10.91298595 | Down | 4.38E-08 | 8.54E-08 | AAEL002383-PA OS=Aedes aegypti GN=AAEL002383 PE=4 SV=1                                                         |
| CCG020053.1 | 648  | 21 | 0 | 1.3925377  | 0.001 | -10.44350067 | Down | 4.38E-08 | 8.54E-08 | -                                                                                                              |
| CCG002196.1 | 682  | 21 | 0 | 1.323115   | 0.001 | -10.36972274 | Down | 4.38E-08 | 8.54E-08 | Putative uncharacterized protein OS=Culex quinquefasciatus GN=CpipJ_CPIJ007192 PE=4 SV=1                       |
| CCG014334.1 | 846  | 21 | 0 | 1.06662462 | 0.001 | -10.05883682 | Down | 4.38E-08 | 8.54E-08 | Guanine nucleotide exchange factor, putative OS=Pediculus humanus subsp. corporis GN=Phum_PHUM503240 PE=4 SV=1 |
| CCG003729.1 | 1509 | 21 | 0 | 0.59798835 | 0.001 | -9.223973579 | Down | 4.38E-08 | 8.54E-08 | AAEL007812-PA OS=Aedes aegypti GN=CYP4H32 PE=3 SV=1                                                            |
| CCG022367.1 | 273  | 22 | 0 | 3.4627625  | 0.001 | -11.75770772 | Down | 1.97E-08 | 3.88E-08 | AAEL011229-PA OS=Aedes aegypti GN=AAEL011229 PE=4 SV=1                                                         |
| CCG004628.1 | 621  | 22 | 0 | 1.52227723 | 0.001 | -10.57201541 | Down | 1.97E-08 | 3.88E-08 | AAEL008440-PA OS=Aedes aegypti GN=AAEL008440 PE=4 SV=1                                                         |
| CCG020377.1 | 741  | 22 | 0 | 1.2757546  | 0.001 | -10.31713513 | Down | 1.97E-08 | 3.88E-08 | AAEL004335-PA OS=Aedes aegypti GN=AAEL004335 PE=4 SV=1                                                         |
| CCG019941.1 | 783  | 22 | 0 | 1.20732332 | 0.001 | -10.23759637 | Down | 1.97E-08 | 3.88E-08 | Putative uncharacterized protein OS=Culex quinquefasciatus GN=CpipJ_CPIJ011970 PE=4 SV=1                       |
| CCG011586.1 | 882  | 22 | 0 | 1.07180744 | 0.001 | -10.06583002 | Down | 1.97E-08 | 3.88E-08 | -                                                                                                              |

|             |      |    |   |            |       |              |      |          |          |                                                                                                             |
|-------------|------|----|---|------------|-------|--------------|------|----------|----------|-------------------------------------------------------------------------------------------------------------|
| CCG026493.1 | 915  | 22 | 0 | 1.03315209 | 0.001 | -10.01283693 | Down | 1.97E-08 | 3.88E-08 | Uncharacterized protein<br>OS=Anopheles darlingi<br>GN=AND_11211 PE=4 SV=1                                  |
| CCG027536.1 | 618  | 23 | 0 | 1.59919724 | 0.001 | -10.64313217 | Down | 8.82E-09 | 1.76E-08 | Ecdysis triggering hormone<br>OS=Aedes aegypti PE=2 SV=1                                                    |
| CCG003688.1 | 654  | 23 | 0 | 1.51116804 | 0.001 | -10.56144838 | Down | 8.82E-09 | 1.76E-08 | AAEL002275-PA OS=Aedes<br>aegypti GN=AAEL002275 PE=4<br>SV=1                                                |
| CCG012487.1 | 735  | 23 | 0 | 1.34463115 | 0.001 | -10.39299476 | Down | 8.82E-09 | 1.76E-08 | AGAP013022-PA OS=Anopheles<br>gambiae GN=AgaP_AGAP013022<br>PE=4 SV=1                                       |
| CCG003765.1 | 1407 | 23 | 0 | 0.70241926 | 0.001 | -9.456188589 | Down | 8.82E-09 | 1.76E-08 | AAEL005004-PA OS=Aedes<br>aegypti GN=AAEL005004 PE=4<br>SV=1                                                |
| CCG020393.1 | 1458 | 23 | 0 | 0.67784904 | 0.001 | -9.404820198 | Down | 8.82E-09 | 1.76E-08 | Putative uncharacterized protein<br>OS=Culex quinquefasciatus<br>GN=CpipJ_CPIJ001348 PE=4<br>SV=1           |
| CCG021507.1 | 879  | 24 | 0 | 1.17323507 | 0.001 | -10.19627639 | Down | 3.96E-09 | 8.00E-09 | AAEL010413-PA OS=Aedes<br>aegypti GN=AAEL010413 PE=4<br>SV=1                                                |
| CCG018091.1 | 1215 | 24 | 0 | 0.84878488 | 0.001 | -9.729255149 | Down | 3.96E-09 | 8.00E-09 | AAEL001053-PA OS=Aedes<br>aegypti GN=AAEL001053 PE=4<br>SV=1                                                |
| CCG005599.1 | 1256 | 24 | 0 | 0.82107773 | 0.001 | -9.681374998 | Down | 3.96E-09 | 8.00E-09 | AAEL009780-PA OS=Aedes<br>aegypti GN=AAEL009780 PE=3<br>SV=1                                                |
| CCG015647.1 | 1491 | 24 | 0 | 0.69166575 | 0.001 | -9.433931205 | Down | 3.96E-09 | 8.00E-09 | AAEL009258-PA OS=Aedes<br>aegypti GN=AAEL009258 PE=4<br>SV=1                                                |
| CCG009553.1 | 3315 | 24 | 0 | 0.3110931  | 0.001 | -8.281202592 | Down | 3.96E-09 | 8.00E-09 | Gamma-aminobutyric acid type B<br>receptor OS=Culex<br>quinquefasciatus<br>GN=CpipJ_CPIJ002466 PE=4<br>SV=1 |
| CCG017307.1 | 792  | 25 | 0 | 1.35636789 | 0.001 | -10.40553282 | Down | 1.78E-09 | 3.63E-09 | AAEL002361-PA OS=Aedes<br>aegypti GN=AAEL002361 PE=4<br>SV=1                                                |
| CCG026763.1 | 489  | 26 | 0 | 2.28468937 | 0.001 | -11.15778231 | Down | 7.96E-10 | 1.65E-09 | AAEL008473-PA OS=Aedes<br>aegypti GN=AAEL008473 PE=4<br>SV=1                                                |
| CCG010494.1 | 711  | 26 | 0 | 1.57132644 | 0.001 | -10.61776721 | Down | 7.96E-10 | 1.65E-09 | AAEL009963-PA OS=Aedes<br>aegypti GN=AAEL009963 PE=4<br>SV=1                                                |
| CCG010391.1 | 813  | 26 | 0 | 1.37418585 | 0.001 | -10.42436142 | Down | 7.96E-10 | 1.65E-09 | -                                                                                                           |

|             |      |    |   |            |       |              |      |          |          |                                                                      |
|-------------|------|----|---|------------|-------|--------------|------|----------|----------|----------------------------------------------------------------------|
| CCG021870.1 | 1065 | 26 | 0 | 1.04902638 | 0.001 | -10.03483525 | Down | 7.96E-10 | 1.65E-09 | AAEL001333-PA OS=Aedes aegypti GN=AAEL001333 PE=4 SV=1               |
| CCG022312.1 | 1170 | 26 | 0 | 0.95488299 | 0.001 | -9.89918015  | Down | 7.96E-10 | 1.65E-09 | AAEL001340-PA (Fragment) OS=Aedes aegypti GN=AAEL001340 PE=4 SV=1    |
| CCG004606.1 | 1302 | 26 | 0 | 0.85807458 | 0.001 | -9.744959231 | Down | 7.96E-10 | 1.65E-09 | AAEL013008-PA OS=Aedes aegypti GN=AAEL013008 PE=4 SV=1               |
| CCG026537.1 | 1416 | 26 | 0 | 0.7889923  | 0.001 | -9.623867414 | Down | 7.96E-10 | 1.65E-09 | AAEL002713-PA (Fragment) OS=Aedes aegypti GN=AAEL002713 PE=4 SV=1    |
| CCG027160.1 | 2049 | 26 | 0 | 0.54524797 | 0.001 | -9.090768695 | Down | 7.96E-10 | 1.65E-09 | AGAP002293-PA OS=Anopheles gambiae GN=AGAP002293 PE=4 SV=3           |
| CCG012275.1 | 468  | 27 | 0 | 2.47902315 | 0.001 | -11.27555603 | Down | 3.57E-10 | 7.49E-10 | AAEL005222-PA OS=Aedes aegypti GN=AAEL005222 PE=4 SV=1               |
| CCG010435.1 | 552  | 27 | 0 | 2.1017805  | 0.001 | -11.03739629 | Down | 3.57E-10 | 7.50E-10 | AAEL012690-PA OS=Aedes aegypti GN=AAEL012690 PE=4 SV=1               |
| CCG020025.1 | 219  | 28 | 0 | 5.49384735 | 0.001 | -12.42360111 | Down | 1.60E-10 | 3.41E-10 | Uncharacterized protein OS=Anopheles darlingi GN=AND_08788 PE=4 SV=1 |
| CCG004366.1 | 285  | 28 | 0 | 4.22158796 | 0.001 | -12.04357006 | Down | 1.60E-10 | 3.41E-10 | AAEL002878-PA OS=Aedes aegypti GN=AAEL002878 PE=4 SV=1               |
| CCG025446.1 | 720  | 28 | 0 | 1.67104523 | 0.001 | -10.70653507 | Down | 1.60E-10 | 3.41E-10 | AAEL003644-PA OS=Aedes aegypti GN=AAEL003644 PE=4 SV=1               |
| CCG005203.1 | 771  | 28 | 0 | 1.56050917 | 0.001 | -10.60780112 | Down | 1.60E-10 | 3.41E-10 | AAEL006429-PA OS=Aedes aegypti GN=AAEL006429 PE=3 SV=1               |
| CCG027834.1 | 363  | 29 | 0 | 3.43284381 | 0.001 | -11.7451885  | Down | 7.19E-11 | 1.54E-10 | AAEL017144-PA OS=Aedes aegypti PE=4 SV=1                             |
| CCG015893.1 | 831  | 29 | 0 | 1.49954549 | 0.001 | -10.55030957 | Down | 7.19E-11 | 1.54E-10 | Uncharacterized protein OS=Anopheles darlingi GN=AND_08032 PE=4 SV=1 |
| CCG007862.1 | 348  | 30 | 0 | 3.70428747 | 0.001 | -11.85498035 | Down | 3.23E-11 | 7.00E-11 | AAEL000929-PA OS=Aedes aegypti GN=AAEL000929 PE=3 SV=1               |
| CCG027590.1 | 795  | 30 | 0 | 1.62149942 | 0.001 | -10.66311279 | Down | 3.23E-11 | 7.00E-11 | -                                                                    |

|             |      |    |   |            |       |              |      |          |          |                                                                                    |
|-------------|------|----|---|------------|-------|--------------|------|----------|----------|------------------------------------------------------------------------------------|
| CCG025964.1 | 1743 | 34 | 0 | 0.83819333 | 0.001 | -9.711139233 | Down | 1.31E-12 | 3.17E-12 | AAEL000873-PA (Fragment)<br>OS=Aedes aegypti<br>GN=AAEL000873 PE=3 SV=1            |
| CCG018700.1 | 897  | 35 | 0 | 1.67663401 | 0.001 | -10.71135209 | Down | 5.86E-13 | 1.50E-12 | -                                                                                  |
| CCG008724.1 | 714  | 38 | 0 | 2.28690464 | 0.001 | -11.1591805  | Down | 5.29E-14 | 1.78E-13 | AAEL013073-PA OS=Aedes<br>aegypti GN=AAEL013073 PE=3<br>SV=1                       |
| CCG016598.1 | 294  | 39 | 0 | 5.70006684 | 0.001 | -12.47676312 | Down | 2.37E-14 | 8.28E-14 | AAEL007735-PA OS=Aedes<br>aegypti GN=AAEL007735 PE=4<br>SV=1                       |
| CCG024954.1 | 744  | 39 | 0 | 2.25244577 | 0.001 | -11.13727665 | Down | 2.37E-14 | 8.27E-14 | AAEL013325-PA OS=Aedes<br>aegypti GN=AAEL013325 PE=4<br>SV=1                       |
| CCG015924.1 | 831  | 39 | 0 | 2.01663014 | 0.001 | -10.9777308  | Down | 2.37E-14 | 8.28E-14 | Uncharacterized protein<br>OS=Anopheles darlingi<br>GN=AND_08032 PE=4 SV=1         |
| CCG006451.1 | 561  | 40 | 0 | 3.06379569 | 0.001 | -11.58110438 | Down | 1.06E-14 | 3.80E-14 | Predicted protein OS=Culex<br>quinquefasciatus<br>GN=CpipJ_CPIJ013022 PE=4<br>SV=1 |
| CCG011880.1 | 477  | 41 | 0 | 3.69341534 | 0.001 | -11.85073979 | Down | 4.78E-15 | 1.72E-14 | -                                                                                  |
| CCG003041.1 | 1035 | 41 | 0 | 1.70218272 | 0.001 | -10.7331702  | Down | 4.78E-15 | 1.72E-14 | AAEL013496-PA OS=Aedes<br>aegypti GN=PPO8 PE=4 SV=1                                |
| CCG002045.1 | 1116 | 42 | 0 | 1.61714055 | 0.001 | -10.65922936 | Down | 2.14E-15 | 7.77E-15 | AAEL009949-PA OS=Aedes<br>aegypti GN=AAEL009949 PE=3<br>SV=1                       |
| CCG000300.1 | 1719 | 42 | 0 | 1.04987135 | 0.001 | -10.03599684 | Down | 2.14E-15 | 7.76E-15 | AAEL009860-PA OS=Aedes<br>aegypti GN=AAEL009860 PE=4<br>SV=1                       |
| CCG010540.1 | 510  | 43 | 0 | 3.62293841 | 0.001 | -11.82294456 | Down | 9.61E-16 | 3.50E-15 | AGAP013237-PA OS=Anopheles<br>gambiae GN=AgaP_AGAP013237<br>PE=4 SV=1              |
| CCG027254.1 | 1074 | 43 | 0 | 1.72038975 | 0.001 | -10.74851972 | Down | 9.61E-16 | 3.50E-15 | AAEL009514-PA OS=Aedes<br>aegypti GN=AAEL009514 PE=4<br>SV=1                       |
| CCG011477.1 | 816  | 44 | 0 | 2.31699549 | 0.001 | -11.17803952 | Down | 4.31E-16 | 1.61E-15 | AAEL000725-PA OS=Aedes<br>aegypti GN=AAEL000725 PE=4<br>SV=1                       |
| CCG009060.1 | 969  | 44 | 0 | 1.9511541  | 0.001 | -10.93011201 | Down | 4.31E-16 | 1.61E-15 | AAEL002689-PA OS=Aedes<br>aegypti GN=AAEL002689 PE=4<br>SV=1                       |
| CCG016082.1 | 252  | 45 | 0 | 7.67316689 | 0.001 | -12.90560642 | Down | 1.93E-16 | 7.26E-16 | -                                                                                  |
| CCG014364.1 | 1161 | 45 | 0 | 1.66549359 | 0.001 | -10.70173409 | Down | 1.93E-16 | 7.26E-16 | Lipase OS=Aedes aegypti<br>GN=AAEL004925 PE=3 SV=1                                 |



|             |      |    |   |            |       |              |      |          |          |                                                                                          |
|-------------|------|----|---|------------|-------|--------------|------|----------|----------|------------------------------------------------------------------------------------------|
| CCG004591.1 | 2694 | 45 | 0 | 0.71775726 | 0.001 | -9.487352207 | Down | 1.93E-16 | 7.26E-16 | AAEL005240-PA OS=Aedes aegypti GN=AAEL005240 PE=4 SV=1                                   |
| CCG026638.1 | 1104 | 46 | 0 | 1.79040561 | 0.001 | -10.80607075 | Down | 8.68E-17 | 3.27E-16 | -                                                                                        |
| CCG007555.1 | 1098 | 47 | 0 | 1.83932379 | 0.001 | -10.84495976 | Down | 3.89E-17 | 1.47E-16 | AAEL004705-PA OS=Aedes aegypti GN=AAEL004705 PE=4 SV=1                                   |
| CCG025751.1 | 1392 | 50 | 0 | 1.54345311 | 0.001 | -10.59194594 | Down | 3.51E-18 | 1.34E-17 | Uncharacterized protein OS=Anopheles darlingi GN=AND_13111 PE=3 SV=1                     |
| CCG011468.3 | 2007 | 50 | 0 | 1.07049663 | 0.001 | -10.06406453 | Down | 3.51E-18 | 1.34E-17 | AAEL010689-PA OS=Aedes aegypti GN=AAEL010689 PE=4 SV=1                                   |
| CCG011043.1 | 285  | 51 | 0 | 7.68932093 | 0.001 | -12.90864048 | Down | 1.58E-18 | 6.06E-18 | AAEL002878-PA OS=Aedes aegypti GN=AAEL002878 PE=4 SV=1                                   |
| CCG018644.1 | 708  | 51 | 0 | 3.09527749 | 0.001 | -11.59585304 | Down | 1.58E-18 | 6.06E-18 | AAEL013918-PA OS=Aedes aegypti GN=AAEL013918 PE=4 SV=1                                   |
| CCG027147.1 | 465  | 52 | 0 | 4.80521763 | 0.001 | -12.23038606 | Down | 7.07E-19 | 2.73E-18 | -                                                                                        |
| CCG019735.1 | 1365 | 52 | 0 | 1.63694227 | 0.001 | -10.67678773 | Down | 7.07E-19 | 2.73E-18 | GD15416 OS=Drosophila simulans GN=GD15416 PE=3 SV=1                                      |
| CCG017202.1 | 420  | 53 | 0 | 5.42237127 | 0.001 | -12.40470818 | Down | 3.17E-19 | 1.23E-18 | AAEL012573-PA OS=Aedes aegypti GN=AAEL012573 PE=4 SV=1                                   |
| CCG025163.3 | 363  | 54 | 0 | 6.39219193 | 0.001 | -12.64209501 | Down | 1.42E-19 | 5.53E-19 | NADH dehydrogenase [ubiquinone] 1 subunit C2 OS=Aedes aegypti GN=AAEL005046 PE=3 SV=1    |
| CCG018289.1 | 1830 | 54 | 0 | 1.26795938 | 0.001 | -10.30829282 | Down | 1.42E-19 | 5.53E-19 | Malic enzyme OS=Aedes aegypti GN=AAEL001073 PE=3 SV=1                                    |
| CCG024212.1 | 555  | 55 | 0 | 4.25826199 | 0.001 | -12.056049   | Down | 6.38E-20 | 2.49E-19 | AAEL007754-PA OS=Aedes aegypti GN=AAEL007754 PE=4 SV=1                                   |
| CCG027815.1 | 246  | 56 | 0 | 9.7817282  | 0.001 | -13.25587366 | Down | 2.86E-20 | 1.12E-19 | Putative uncharacterized protein OS=Culex quinquefasciatus GN=CpipJ_CPIJ011592 PE=4 SV=1 |
| CCG003754.1 | 540  | 56 | 0 | 4.45612063 | 0.001 | -12.12157257 | Down | 2.86E-20 | 1.12E-19 | AAEL014879-PA OS=Aedes aegypti GN=AAEL014879 PE=4 SV=1                                   |
| CCG005716.1 | 432  | 57 | 0 | 5.66961776 | 0.001 | -12.46903576 | Down | 1.28E-20 | 5.04E-20 | AAEL004001-PA OS=Aedes aegypti GN=AAEL004001 PE=4 SV=1                                   |

|             |      |    |   |            |       |              |      |          |          |                                                                                                                               |
|-------------|------|----|---|------------|-------|--------------|------|----------|----------|-------------------------------------------------------------------------------------------------------------------------------|
| CCG012993.1 | 432  | 58 | 0 | 5.76908474 | 0.001 | -12.49412674 | Down | 5.76E-21 | 2.27E-20 | Protein disulfide isomerase-like PDI-H OS=Physcomitrella patens PE=2 SV=1                                                     |
| CCG027395.1 | 327  | 59 | 0 | 7.75294906 | 0.001 | -12.92052947 | Down | 2.58E-21 | 1.02E-20 | AAEL008308-PA OS=Aedes aegypti GN=AAEL008308 PE=4 SV=1                                                                        |
| CCG017067.1 | 690  | 61 | 0 | 3.79877364 | 0.001 | -11.89131803 | Down | 5.20E-22 | 2.06E-21 | Putative uncharacterized protein OS=Culex quinquefasciatus GN=CpipJ_CPIJ015444 PE=4 SV=1                                      |
| CCG004738.1 | 1851 | 62 | 0 | 1.43928879 | 0.001 | -10.49114038 | Down | 2.33E-22 | 9.29E-22 | Hyperpolarization activated cyclic nucleotide-gated potassium channel OS=Culex quinquefasciatus GN=CpipJ_CPIJ001483 PE=4 SV=1 |
| CCG009550.1 | 843  | 65 | 0 | 3.31320611 | 0.001 | -11.69401224 | Down | 2.11E-23 | 8.46E-23 | AAEL007706-PA OS=Aedes aegypti GN=AAEL007706 PE=4 SV=1                                                                        |
| CCG001524.1 | 651  | 66 | 0 | 4.35637862 | 0.001 | -12.08891363 | Down | 9.45E-24 | 3.80E-23 | -                                                                                                                             |
| CCG004505.1 | 1674 | 66 | 0 | 1.69414724 | 0.001 | -10.72634355 | Down | 9.45E-24 | 3.80E-23 | AAEL007188-PA (Fragment) OS=Aedes aegypti GN=AAEL007188 PE=4 SV=1                                                             |
| CCG000700.1 | 609  | 67 | 0 | 4.72737639 | 0.001 | -12.20682402 | Down | 4.24E-24 | 1.71E-23 | Putative uncharacterized protein OS=Culex quinquefasciatus GN=CpipJ_CPIJ014666 PE=4 SV=1                                      |
| CCG020247.1 | 1302 | 68 | 0 | 2.24419505 | 0.001 | -11.13198235 | Down | 1.90E-24 | 7.69E-24 | Uncharacterized protein OS=Anopheles darlingi GN=AND_15514 PE=4 SV=1                                                          |
| CCG017298.1 | 471  | 70 | 0 | 6.38616013 | 0.001 | -12.64073301 | Down | 3.83E-25 | 1.56E-24 | -                                                                                                                             |
| CCG000755.1 | 642  | 72 | 0 | 4.81903566 | 0.001 | -12.23452876 | Down | 7.70E-26 | 3.15E-25 | AAEL013737-PA OS=Aedes aegypti GN=AAEL013737 PE=4 SV=1                                                                        |
| CCG026297.1 | 1476 | 72 | 0 | 2.09608462 | 0.001 | -11.03348124 | Down | 7.70E-26 | 3.15E-25 | -                                                                                                                             |
| CCG012388.1 | 1518 | 73 | 0 | 2.06639699 | 0.001 | -11.01290173 | Down | 3.45E-26 | 1.42E-25 | AAEL001658-PA OS=Aedes aegypti GN=AAEL001658 PE=4 SV=1                                                                        |
| CCG019807.1 | 1611 | 73 | 0 | 1.94710778 | 0.001 | -10.92711703 | Down | 3.45E-26 | 1.42E-25 | AAEL007121-PA OS=Aedes aegypti GN=AAEL007121 PE=4 SV=1                                                                        |
| CCG011522.1 | 486  | 74 | 0 | 6.54271679 | 0.001 | -12.67567411 | Down | 1.55E-26 | 6.38E-26 | -                                                                                                                             |

|             |      |     |   |            |       |              |      |          |          |                                                                                                                                      |
|-------------|------|-----|---|------------|-------|--------------|------|----------|----------|--------------------------------------------------------------------------------------------------------------------------------------|
| CCG021755.1 | 1215 | 74  | 0 | 2.61708672 | 0.001 | -11.35374601 | Down | 1.55E-26 | 6.38E-26 | AAEL002274-PA (Fragment)<br>OS=Aedes aegypti<br>GN=AAEL002274 PE=4 SV=1                                                              |
| CCG010538.1 | 1290 | 74  | 0 | 2.46493051 | 0.001 | -11.26733126 | Down | 1.55E-26 | 6.39E-26 | AAEL006399-PA OS=Aedes<br>aegypti GN=AAEL006399 PE=4<br>SV=1                                                                         |
| CCG004014.1 | 678  | 75  | 0 | 4.75328923 | 0.001 | -12.21471047 | Down | 6.95E-27 | 2.87E-26 | AAEL002657-PA OS=Aedes<br>aegypti GN=AAEL002657 PE=4<br>SV=1                                                                         |
| CCG024050.1 | 1725 | 76  | 0 | 1.89315932 | 0.001 | -10.88658011 | Down | 3.12E-27 | 1.29E-26 | AAEL001658-PA OS=Aedes<br>aegypti GN=AAEL001658 PE=4<br>SV=1                                                                         |
| CCG000598.1 | 1851 | 77  | 0 | 1.78750382 | 0.001 | -10.80373061 | Down | 1.40E-27 | 5.80E-27 | Hyperpolarization activated cyclic<br>nucleotide-gated potassium<br>channel OS=Culex<br>quinquefasciatus<br>GN=CpipJ_CPIJ001482 PE=4 |
| CCG020425.1 | 375  | 78  | 0 | 8.9377048  | 0.001 | -13.12568868 | Down | 6.28E-28 | 2.61E-27 | -                                                                                                                                    |
| CCG022406.1 | 402  | 79  | 0 | 8.44430108 | 0.001 | -13.0437623  | Down | 2.82E-28 | 1.17E-27 | -                                                                                                                                    |
| CCG017949.1 | 897  | 80  | 0 | 3.83230632 | 0.001 | -11.90399717 | Down | 1.26E-28 | 5.28E-28 | -                                                                                                                                    |
| CCG023186.1 | 651  | 84  | 0 | 5.54448189 | 0.001 | -12.43683694 | Down | 5.11E-30 | 2.15E-29 | -                                                                                                                                    |
| CCG003636.1 | 756  | 85  | 0 | 4.83125323 | 0.001 | -12.23818176 | Down | 2.29E-30 | 9.69E-30 | AAEL009485-PA OS=Aedes<br>aegypti GN=AAEL009485 PE=4<br>SV=1                                                                         |
| CCG017732.1 | 606  | 87  | 0 | 6.1689223  | 0.001 | -12.59080276 | Down | 4.62E-31 | 1.96E-30 | AGAP004947-PA OS=Anopheles<br>gambiae GN=AGAP004947 PE=4<br>SV=1                                                                     |
| CCG002324.1 | 1251 | 87  | 0 | 2.98830289 | 0.001 | -11.54511067 | Down | 4.62E-31 | 1.96E-30 | AAEL006924-PA OS=Aedes<br>aegypti GN=AAEL006924 PE=4<br>SV=1                                                                         |
| CCG006739.1 | 561  | 90  | 0 | 6.89354031 | 0.001 | -12.75102938 | Down | 4.17E-32 | 1.78E-31 | AAEL003217-PA OS=Aedes<br>aegypti GN=AAEL003217 PE=4<br>SV=1                                                                         |
| CCG004986.1 | 1638 | 90  | 0 | 2.36097443 | 0.001 | -11.2051667  | Down | 4.17E-32 | 1.78E-31 | AAEL000108-PA OS=Aedes<br>aegypti GN=AAEL000108 PE=4<br>SV=1                                                                         |
| CCG014398.1 | 1908 | 98  | 0 | 2.20704088 | 0.001 | -11.10789763 | Down | 6.84E-35 | 2.96E-34 | Putative uncharacterized protein<br>OS=Culex quinquefasciatus<br>GN=CpipJ_CPIJ018057 PE=4<br>SV=1                                    |
| CCG014950.1 | 1719 | 99  | 0 | 2.47469676 | 0.001 | -11.27303604 | Down | 3.07E-35 | 1.33E-34 | AAEL009860-PA OS=Aedes<br>aegypti GN=AAEL009860 PE=4<br>SV=1                                                                         |
| CCG006211.1 | 1806 | 102 | 0 | 2.42686209 | 0.001 | -11.24487641 | Down | 2.77E-36 | 1.21E-35 | AAEL003976-PA OS=Aedes<br>aegypti GN=AAEL003976 PE=4<br>SV=1                                                                         |

|             |      |     |   |            |       |              |      |          |          |                                                                                       |
|-------------|------|-----|---|------------|-------|--------------|------|----------|----------|---------------------------------------------------------------------------------------|
| CCG008090.1 | 711  | 103 | 0 | 6.22487013 | 0.001 | -12.60382802 | Down | 1.24E-36 | 5.44E-36 | AAEL009963-PA OS=Aedes aegypti GN=AAEL009963 PE=4 SV=1                                |
| CCG002150.1 | 2247 | 106 | 0 | 2.02705468 | 0.001 | -10.98516929 | Down | 1.12E-37 | 4.94E-37 | AAEL000382-PA OS=Aedes aegypti GN=AAEL000382 PE=4 SV=1                                |
| CCG021138.1 | 1368 | 107 | 0 | 3.36093684 | 0.001 | -11.71464772 | Down | 5.03E-38 | 2.22E-37 | GD15416 OS=Drosophila simulans GN=GD15416 PE=3 SV=1                                   |
| CCG003365.1 | 681  | 108 | 0 | 6.81458346 | 0.001 | -12.73440976 | Down | 2.26E-38 | 9.99E-38 | AAEL015481-PA OS=Aedes aegypti GN=AAEL015481 PE=4 SV=1                                |
| CCG014194.1 | 1512 | 112 | 0 | 3.1829433  | 0.001 | -11.63614574 | Down | 9.14E-40 | 4.07E-39 | AAEL007411-PA OS=Aedes aegypti GN=AAEL007411 PE=4 SV=1                                |
| CCG023820.1 | 627  | 114 | 0 | 7.81267902 | 0.001 | -12.93160163 | Down | 1.84E-40 | 8.22E-40 | AAEL014067-PA OS=Aedes aegypti GN=AAEL014067 PE=4 SV=1                                |
| CCG018151.1 | 561  | 116 | 0 | 8.88500751 | 0.001 | -13.11715728 | Down | 3.70E-41 | 1.66E-40 | AAEL003576-PA OS=Aedes aegypti GN=AAEL003576 PE=4 SV=1                                |
| CCG006969.1 | 876  | 117 | 0 | 5.73910839 | 0.001 | -12.48661091 | Down | 1.66E-41 | 7.46E-41 | AAEL010658-PA OS=Aedes aegypti GN=AAEL010658 PE=4 SV=1                                |
| CCG002697.1 | 1395 | 121 | 0 | 3.72712393 | 0.001 | -11.86384708 | Down | 6.72E-43 | 3.03E-42 | AAEL005630-PA OS=Aedes aegypti GN=AAEL005630 PE=4 SV=1                                |
| CCG002783.1 | 1245 | 122 | 0 | 4.21068885 | 0.001 | -12.03984056 | Down | 3.02E-43 | 1.36E-42 | AAEL005714-PA (Fragment) OS=Aedes aegypti GN=AAEL005714 PE=4 SV=1                     |
| CCG004579.1 | 1638 | 122 | 0 | 3.200432   | 0.001 | -11.64405094 | Down | 3.02E-43 | 1.36E-42 | AAEL000108-PA OS=Aedes aegypti GN=AAEL000108 PE=4 SV=1                                |
| CCG001526.1 | 687  | 123 | 0 | 7.69327126 | 0.001 | -12.90938146 | Down | 1.35E-43 | 6.13E-43 | -                                                                                     |
| CCG002603.1 | 843  | 126 | 0 | 6.42252261 | 0.001 | -12.64892435 | Down | 1.22E-44 | 5.56E-44 | AAEL007706-PA OS=Aedes aegypti GN=AAEL007706 PE=4 SV=1                                |
| CCG002701.1 | 930  | 128 | 0 | 5.91411401 | 0.001 | -12.52994634 | Down | 2.46E-45 | 1.12E-44 | AAEL000694-PA OS=Aedes aegypti GN=AAEL000694 PE=4 SV=1                                |
| CCG027361.1 | 489  | 129 | 0 | 11.3355742 | 0.001 | -13.46856985 | Down | 1.10E-45 | 5.05E-45 | Putative uncharacterized protein OS=Tribolium castaneum GN=TcasGA2_TC005836 PE=4 SV=1 |
| CCG026915.1 | 1656 | 129 | 0 | 3.34728005 | 0.001 | -11.70877354 | Down | 1.10E-45 | 5.05E-45 | AAEL002674-PA OS=Aedes aegypti GN=AAEL002674 PE=4 SV=1                                |

|             |      |     |   |            |       |              |      |          |          |                                                                                  |
|-------------|------|-----|---|------------|-------|--------------|------|----------|----------|----------------------------------------------------------------------------------|
| CCG023461.1 | 1629 | 130 | 0 | 3.42913781 | 0.001 | -11.74363017 | Down | 4.95E-46 | 2.27E-45 | AAEL002674-PA OS=Aedes aegypti GN=AAEL002674 PE=4 SV=1                           |
| CCG026162.1 | 1239 | 132 | 0 | 4.5778894  | 0.001 | -12.16046689 | Down | 9.95E-47 | 4.58E-46 | Vitelline envelope protein alpha OS=Oncorhynchus mykiss PE=2 SV=1                |
| CCG021524.1 | 477  | 133 | 0 | 11.981079  | 0.001 | -13.54847023 | Down | 4.46E-47 | 2.06E-46 | -                                                                                |
| CCG001041.1 | 696  | 134 | 0 | 8.27290868 | 0.001 | -13.01417894 | Down | 2.00E-47 | 9.24E-47 | -                                                                                |
| CCG025671.1 | 1509 | 139 | 0 | 3.95811339 | 0.001 | -11.95059723 | Down | 3.64E-49 | 1.69E-48 | AAEL007411-PA OS=Aedes aegypti GN=AAEL007411 PE=4 SV=1                           |
| CCG021915.1 | 1647 | 139 | 0 | 3.62646819 | 0.001 | -11.82434948 | Down | 3.64E-49 | 1.69E-48 | AAEL002405-PA OS=Aedes aegypti GN=AAEL002405 PE=4 SV=1                           |
| CCG008141.1 | 2343 | 139 | 0 | 2.54920747 | 0.001 | -11.31583308 | Down | 3.64E-49 | 1.69E-48 | AAEL000382-PA OS=Aedes aegypti GN=AAEL000382 PE=4 SV=1                           |
| CCG023518.1 | 948  | 141 | 0 | 6.39106812 | 0.001 | -12.64184135 | Down | 7.32E-50 | 3.41E-49 | AAEL005907-PA OS=Aedes aegypti GN=AAEL005907 PE=4 SV=1                           |
| CCG023349.1 | 657  | 143 | 0 | 9.35262108 | 0.001 | -13.19115502 | Down | 1.47E-50 | 6.89E-50 | AAEL013073-PA OS=Aedes aegypti GN=AAEL013073 PE=3 SV=1                           |
| CCG005701.1 | 642  | 145 | 0 | 9.70500237 | 0.001 | -13.24451285 | Down | 2.97E-51 | 1.39E-50 | AAEL002052-PA OS=Aedes aegypti GN=AAEL002052 PE=4 SV=1                           |
| CCG020854.1 | 720  | 148 | 0 | 8.83266767 | 0.001 | -13.10863352 | Down | 2.68E-52 | 1.26E-51 | -                                                                                |
| CCG012907.1 | 1113 | 148 | 0 | 5.7138551  | 0.001 | -12.48024873 | Down | 2.68E-52 | 1.26E-51 | AAEL002270-PA OS=Aedes aegypti GN=AAEL002270 PE=4 SV=1                           |
| CCG001249.1 | 1248 | 151 | 0 | 5.19906244 | 0.001 | -12.34403577 | Down | 2.42E-53 | 1.14E-52 | AAEL006924-PA OS=Aedes aegypti GN=AAEL006924 PE=4 SV=1                           |
| CCG022067.1 | 1479 | 156 | 0 | 4.53230466 | 0.001 | -12.14602913 | Down | 4.39E-55 | 2.08E-54 | AAEL000542-PA OS=Aedes aegypti GN=AAEL000542 PE=4 SV=1                           |
| CCG001562.1 | 588  | 160 | 0 | 11.6924448 | 0.001 | -13.513289   | Down | 1.78E-56 | 8.48E-56 | -                                                                                |
| CCG026163.1 | 1458 | 160 | 0 | 4.71547156 | 0.001 | -12.20318634 | Down | 1.78E-56 | 8.48E-56 | Putative uncharacterized protein OS=Harpegnathos saltator GN=EAI_02652 PE=4 SV=1 |
| CCG023341.1 | 369  | 167 | 0 | 19.4470073 | 0.001 | -14.24726053 | Down | 6.50E-59 | 3.12E-58 | AAEL003177-PA OS=Aedes aegypti GN=AAEL003177 PE=4 SV=1                           |
| CCG006177.1 | 594  | 167 | 0 | 12.0807166 | 0.001 | -13.56041842 | Down | 6.50E-59 | 3.12E-58 | -                                                                                |
| CCG017154.1 | 360  | 170 | 0 | 20.2912636 | 0.001 | -14.30857109 | Down | 5.87E-60 | 2.83E-59 | AAEL012715-PA OS=Aedes aegypti GN=AAEL012715 PE=4 SV=1                           |

|             |      |     |   |            |       |              |      |          |          |                                                                                          |
|-------------|------|-----|---|------------|-------|--------------|------|----------|----------|------------------------------------------------------------------------------------------|
| CCG020012.1 | 384  | 178 | 0 | 19.9182624 | 0.001 | -14.28180418 | Down | 9.62E-63 | 4.68E-62 | -                                                                                        |
| CCG027782.1 | 1623 | 184 | 0 | 4.87149179 | 0.001 | -12.25014792 | Down | 7.84E-65 | 3.83E-64 | Putative protein OS=Culex quinquefasciatus GN=CpipJ_CPIJ009617 PE=4 SV=1                 |
| CCG013013.1 | 1173 | 190 | 0 | 6.96014457 | 0.001 | -12.76490156 | Down | 6.39E-67 | 3.14E-66 | AAEL009564-PA OS=Aedes aegypti GN=AAEL009564 PE=4 SV=1                                   |
| CCG000021.1 | 801  | 191 | 0 | 10.2462164 | 0.001 | -13.32280364 | Down | 2.87E-67 | 1.41E-66 | -                                                                                        |
| CCG001024.1 | 699  | 195 | 0 | 11.987265  | 0.001 | -13.54921491 | Down | 1.16E-68 | 5.73E-68 | AAEL001452-PA OS=Aedes aegypti GN=AAEL001452 PE=4 SV=1                                   |
| CCG019017.1 | 513  | 196 | 0 | 16.4172865 | 0.001 | -14.00292807 | Down | 5.21E-69 | 2.57E-68 | -                                                                                        |
| CCG006467.1 | 702  | 206 | 0 | 12.6093523 | 0.001 | -13.62220655 | Down | 1.72E-72 | 8.57E-72 | AAEL005352-PA OS=Aedes aegypti GN=AAEL005352 PE=4 SV=1                                   |
| CCG000244.1 | 1674 | 211 | 0 | 5.4161374  | 0.001 | -12.40304862 | Down | 3.12E-74 | 1.57E-73 | AAEL007188-PA (Fragment) OS=Aedes aegypti GN=AAEL007188 PE=4 SV=1                        |
| CCG017459.1 | 615  | 212 | 0 | 14.8123313 | 0.001 | -13.8545111  | Down | 1.40E-74 | 7.02E-74 | AAEL010160-PA OS=Aedes aegypti GN=AAEL010160 PE=4 SV=1                                   |
| CCG022757.1 | 1314 | 215 | 0 | 7.03081655 | 0.001 | -12.77947654 | Down | 1.26E-75 | 6.36E-75 | -                                                                                        |
| CCG011441.1 | 1881 | 219 | 0 | 5.00285586 | 0.001 | -12.28853617 | Down | 5.12E-77 | 2.58E-76 | AAEL015536-PA OS=Aedes aegypti GN=AAEL015536 PE=4 SV=1                                   |
| CCG023615.1 | 1503 | 223 | 0 | 6.37541638 | 0.001 | -12.63830385 | Down | 2.07E-78 | 1.05E-77 | AAEL000542-PA OS=Aedes aegypti GN=AAEL000542 PE=4 SV=1                                   |
| CCG013078.1 | 333  | 227 | 0 | 29.291681  | 0.001 | -14.83820337 | Down | 8.40E-80 | 4.26E-79 | -                                                                                        |
| CCG014856.1 | 873  | 239 | 0 | 11.7637647 | 0.001 | -13.52206221 | Down | 5.58E-84 | 2.86E-83 | Putative uncharacterized protein OS=Culex quinquefasciatus GN=CpipJ_CPIJ011620 PE=4 SV=1 |
| CCG022597.1 | 477  | 240 | 0 | 21.6199923 | 0.001 | -14.40007839 | Down | 2.50E-84 | 1.28E-83 | AAEL001115-PA OS=Aedes aegypti GN=AAEL001115 PE=4 SV=1                                   |
| CCG021991.1 | 273  | 242 | 0 | 38.0903875 | 0.001 | -15.21713934 | Down | 5.04E-85 | 2.58E-84 | -                                                                                        |
| CCG014875.1 | 600  | 243 | 0 | 17.4027425 | 0.001 | -14.08702706 | Down | 2.26E-85 | 1.16E-84 | AAEL009046-PA OS=Aedes aegypti GN=AAEL009046 PE=4 SV=1                                   |
| CCG014755.1 | 2616 | 248 | 0 | 4.0735834  | 0.001 | -11.99208273 | Down | 4.10E-87 | 2.12E-86 | Putative uncharacterized protein OS=Culex quinquefasciatus GN=CpipJ_CPIJ011070 PE=4 SV=1 |

|             |      |     |   |            |       |              |      |           |           |                                                                           |
|-------------|------|-----|---|------------|-------|--------------|------|-----------|-----------|---------------------------------------------------------------------------|
| CCG005487.1 | 1434 | 249 | 0 | 7.46127191 | 0.001 | -12.86520587 | Down | 1.84E-87  | 9.52E-87  | AAEL005004-PA OS=Aedes aegypti GN=AAEL005004 PE=4 SV=1                    |
| CCG008102.1 | 594  | 250 | 0 | 18.0849051 | 0.001 | -14.14249841 | Down | 8.26E-88  | 4.27E-87  | -                                                                         |
| CCG028482.1 | 1056 | 252 | 0 | 10.2541412 | 0.001 | -13.32391905 | Down | 1.66E-88  | 8.61E-88  | AAEL010114-PA OS=Aedes aegypti GN=AAEL010114 PE=4 SV=1                    |
| CCG023069.1 | 336  | 257 | 0 | 32.8667315 | 0.001 | -15.00434037 | Down | 3.02E-90  | 1.57E-89  | Predicted protein OS=Culex quinquefasciatus GN=CpipJ_CPIJ010777 PE=4 SV=1 |
| CCG017948.1 | 516  | 259 | 0 | 21.568142  | 0.001 | -14.39661428 | Down | 6.08E-91  | 3.16E-90  | -                                                                         |
| CCG017204.1 | 600  | 261 | 0 | 18.6918346 | 0.001 | -14.19012055 | Down | 1.22E-91  | 6.38E-91  | AAEL009040-PA OS=Aedes aegypti GN=AAEL009046 PE=4 SV=1                    |
| CCG027480.1 | 696  | 264 | 0 | 16.2988649 | 0.001 | -13.99248387 | Down | 1.10E-92  | 5.77E-92  | Uncharacterized protein OS=Anopheles darlingi GN=AND_17586 PE=4 SV=1      |
| CCG007804.2 | 5748 | 267 | 0 | 1.99598454 | 0.001 | -10.96288483 | Down | 9.97E-94  | 5.21E-93  | AAEL005109-PA OS=Aedes aegypti GN=AAEL005109 PE=4 SV=1                    |
| CCG005118.1 | 945  | 269 | 0 | 12.2315964 | 0.001 | -13.57832509 | Down | 2.01E-94  | 1.05E-93  | AAEL005027-PA OS=Aedes aegypti GN=AAEL003027 PE=4 SV=1                    |
| CCG005751.1 | 720  | 279 | 0 | 16.6507722 | 0.001 | -14.02330146 | Down | 6.62E-98  | 3.49E-97  | AAEL009697-PA OS=Aedes aegypti GN=AAEL009697 PE=4 SV=1                    |
| CCG016572.1 | 615  | 282 | 0 | 19.7031954 | 0.001 | -14.266142   | Down | 5.98E-99  | 3.16E-98  | AAEL010160-PA OS=Aedes aegypti GN=AAEL010160 PE=4 SV=1                    |
| CCG000293.1 | 795  | 287 | 0 | 15.5123444 | 0.001 | -13.92112912 | Down | 1.09E-100 | 5.76E-100 | -                                                                         |
| CCG005290.1 | 357  | 288 | 0 | 34.6646599 | 0.001 | -15.08117798 | Down | 4.87E-101 | 2.58E-100 | Cuticle protein OS=Culex quinquefasciatus GN=CpipJ_CPIJ003474 PE=4 SV=1   |
| CCG017925.1 | 1095 | 290 | 0 | 11.3801124 | 0.001 | -13.47422718 | Down | 9.80E-102 | 5.20E-101 | -                                                                         |
| CCG013637.1 | 1293 | 304 | 0 | 10.1027064 | 0.001 | -13.3024542  | Down | 1.31E-106 | 7.00E-106 | AAEL004939-PA OS=Aedes aegypti GN=AAEL004939 PE=3 SV=1                    |
| CCG018730.1 | 1572 | 312 | 0 | 8.52834427 | 0.001 | -13.05804996 | Down | 2.15E-109 | 1.15E-108 | AAEL014288-PA OS=Aedes aegypti GN=AAEL014288 PE=4 SV=1                    |
| CCG006934.1 | 669  | 318 | 0 | 20.4250756 | 0.001 | -14.3180538  | Down | 1.75E-111 | 9.43E-111 | AAEL011558-PA OS=Aedes aegypti GN=AAEL011558 PE=3 SV=1                    |
| CCG016441.1 | 441  | 323 | 0 | 31.4721639 | 0.001 | -14.94178876 | Down | 3.18E-113 | 1.72E-112 | -                                                                         |

|             |      |     |   |            |       |              |      |           |           |                                                                                                  |
|-------------|------|-----|---|------------|-------|--------------|------|-----------|-----------|--------------------------------------------------------------------------------------------------|
| CCG017614.1 | 345  | 329 | 0 | 40.9769353 | 0.001 | -15.32252447 | Down | 2.59E-115 | 1.40E-114 | AAEL013751-PA OS=Aedes aegypti GN=AAEL013751 PE=4 SV=1                                           |
| CCG016799.1 | 702  | 330 | 0 | 20.1994479 | 0.001 | -14.30202824 | Down | 1.16E-115 | 6.31E-115 | AAEL005552-PA OS=Aedes aegypti GN=AAEL005552 PE=4 SV=1                                           |
| CCG011247.1 | 819  | 344 | 0 | 18.0483379 | 0.001 | -14.13957836 | Down | 1.55E-120 | 8.51E-120 | -                                                                                                |
| CCG021646.1 | 2442 | 346 | 0 | 6.08825888 | 0.001 | -12.57181399 | Down | 3.13E-121 | 1.71E-120 | AAEL005595-PA OS=Aedes aegypti GN=AAEL005595 PE=4 SV=1                                           |
| CCG025202.1 | 717  | 347 | 0 | 20.7956735 | 0.001 | -14.34399579 | Down | 1.40E-121 | 7.69E-121 | Uncharacterized protein OS=Anopheles darlingi GN=AND_02268 PE=4 SV=1                             |
| CCG019111.1 | 1839 | 367 | 0 | 8.57525427 | 0.001 | -13.06596373 | Down | 1.53E-128 | 8.47E-128 | Malic enzyme OS=Aedes aegypti GN=AAEL001073 PE=3 SV=1                                            |
| CCG026409.1 | 924  | 368 | 0 | 17.1134874 | 0.001 | -14.06284616 | Down | 6.86E-129 | 3.80E-128 | Putative uncharacterized protein OS=Culex quinquefasciatus GN=CpipJ_CPIJ013371 PE=4 SV=1         |
| CCG022783.1 | 1959 | 369 | 0 | 8.09383975 | 0.001 | -12.98260857 | Down | 3.08E-129 | 1.71E-128 | AAEL011020-PA OS=Aedes aegypti GN=AAEL011020 PE=4 SV=1                                           |
| CCG027992.1 | 855  | 372 | 0 | 18.6956038 | 0.001 | -14.19041145 | Down | 2.78E-130 | 1.54E-129 | AAEL006418-PA OS=Aedes aegypti GN=AAEL006418 PE=3 SV=1                                           |
| CCG000615.1 | 741  | 385 | 0 | 22.3257056 | 0.001 | -14.44641815 | Down | 8.27E-135 | 4.62E-134 | Serine protease inhibitor dipetalogastin OS=Culex quinquefasciatus GN=CpipJ_CPIJ010521 PE=4 SV=1 |
| CCG026431.1 | 774  | 416 | 0 | 23.0948444 | 0.001 | -14.49528321 | Down | 1.33E-145 | 7.54E-145 | Superoxide dismutase OS=Aedes aegypti GN=MNSOD2 PE=3 SV=1                                        |
| CCG012966.1 | 1131 | 420 | 0 | 15.9569306 | 0.001 | -13.96189555 | Down | 5.40E-147 | 3.06E-146 | AAEL009451-PA OS=Aedes aegypti GN=AAEL009451 PE=3 SV=1                                           |
| CCG011556.1 | 591  | 445 | 0 | 32.3545379 | 0.001 | -14.98168045 | Down | 1.07E-155 | 6.11E-155 | AGAP006829-PA OS=Anopheles gambiae GN=CPR59 PE=4 SV=4                                            |
| CCG007146.1 | 1488 | 497 | 0 | 14.3521224 | 0.001 | -13.80897648 | Down | 8.42E-174 | 4.90E-173 | AAEL006017-PA OS=Aedes aegypti GN=AAEL006017 PE=4 SV=1                                           |
| CCG010349.1 | 306  | 509 | 0 | 71.4758004 | 0.001 | -16.12516725 | Down | 5.60E-178 | 3.27E-177 | AAEL003177-PA OS=Aedes aegypti GN=AAEL003177 PE=4 SV=1                                           |
| CCG019784.1 | 918  | 518 | 0 | 24.2465387 | 0.001 | -14.56549119 | Down | 4.12E-181 | 2.41E-180 | -                                                                                                |
| CCG028082.1 | 384  | 590 | 0 | 66.0212068 | 0.001 | -16.01064189 | Down | 3.53E-206 | 2.12E-205 | -                                                                                                |



|             |      |      |   |            |       |              |      |           |           |                                                                                                               |
|-------------|------|------|---|------------|-------|--------------|------|-----------|-----------|---------------------------------------------------------------------------------------------------------------|
| CCG020272.1 | 357  | 602  | 0 | 72.4587682 | 0.001 | -16.14487266 | Down | 2.35E-210 | 1.41E-209 | Cuticle protein OS=Culex quinquefasciatus<br>GN=CpipJ_CPIJ003474 PE=4<br>SV=1                                 |
| CCG017455.1 | 519  | 616  | 0 | 51.0006869 | 0.001 | -15.63822906 | Down | 3.14E-215 | 1.89E-214 | AAEL010101-PA OS=Aedes aegypti GN=AAEL010161 PE=4<br>SV=1                                                     |
| CCG027990.1 | 759  | 616  | 0 | 34.8739875 | 0.001 | -15.08986371 | Down | 3.14E-215 | 1.89E-214 | AAEL006403-PA OS=Aedes aegypti GN=AAEL006403 PE=3<br>SV=1                                                     |
| CCG010213.1 | 606  | 631  | 0 | 44.7424134 | 0.001 | -15.44935546 | Down | 1.88E-220 | 1.14E-219 | -                                                                                                             |
| CCG019078.1 | 1584 | 634  | 0 | 17.1987448 | 0.001 | -14.07001566 | Down | 1.70E-221 | 1.03E-220 | Glutamate dehydrogenase OS=Aedes aegypti<br>GN=AAEL003757 PE=3 SV=1                                           |
| CCG008372.1 | 1002 | 644  | 0 | 27.6172745 | 0.001 | -14.75328333 | Down | 5.60E-225 | 3.40E-224 | AAEL005010-PA OS=Aedes aegypti GN=AAEL005010 PE=4<br>SV=1                                                     |
| CCG027515.1 | 171  | 677  | 0 | 170.119943 | 0.001 | -17.37619276 | Down | 1.82E-236 | 1.11E-235 | AAEL005219-PA OS=Aedes aegypti GN=AAEL005219 PE=4<br>SV=1                                                     |
| CCG002914.1 | 2838 | 721  | 0 | 10.9165534 | 0.001 | -13.41422982 | Down | 8.74E-252 | 5.38E-251 | Putative uncharacterized protein OS=Candida tropicalis (strain ATCC MYA-3404 / T1)<br>GN=CTRG_04951 PE=4 SV=1 |
| CCG020534.1 | 489  | 753  | 0 | 66.1681189 | 0.001 | -16.01384865 | Down | 6.32E-263 | 3.92E-262 | AAEL003027-PA OS=Aedes aegypti GN=AAEL003027 PE=4<br>SV=1                                                     |
| CCG021899.1 | 1269 | 759  | 0 | 25.7005741 | 0.001 | -14.64951297 | Down | 5.15E-265 | 3.20E-264 | AAEL010882-PA OS=Aedes aegypti GN=AAEL010882 PE=4<br>SV=1                                                     |
| CCG026261.2 | 1881 | 802  | 0 | 18.3209607 | 0.001 | -14.16120754 | Down | 5.52E-280 | 3.44E-279 | AAEL015536-PA OS=Aedes aegypti GN=AAEL015536 PE=4<br>SV=1                                                     |
| CCG019693.1 | 846  | 828  | 0 | 42.0554849 | 0.001 | -15.36000635 | Down | 4.90E-289 | 3.07E-288 | AAEL010684-PA OS=Aedes aegypti GN=AAEL010684 PE=4<br>SV=1                                                     |
| CCG013236.1 | 741  | 911  | 0 | 52.8278384 | 0.001 | -15.68901076 | Down | 0         | 0         | Serine protease inhibitor dipetalogastin OS=Culex quinquefasciatus<br>GN=CpipJ_CPIJ010521 PE=4<br>SV=1        |
| CCG000433.1 | 822  | 918  | 0 | 47.9880978 | 0.001 | -15.55038901 | Down | 0         | 0         | AAEL013951-PA OS=Aedes aegypti GN=AAEL013951 PE=3<br>SV=1                                                     |
| CCG024283.1 | 402  | 1061 | 0 | 113.41017  | 0.001 | -16.7911905  | Down | 0         | 0         | AAEL003311-PA OS=Aedes aegypti GN=AAEL003311 PE=4<br>SV=1                                                     |

|             |      |      |   |            |             |              |      |           |            |                                                                                          |
|-------------|------|------|---|------------|-------------|--------------|------|-----------|------------|------------------------------------------------------------------------------------------|
| CCG011370.1 | 234  | 1203 | 0 | 220.908507 | 0.001       | -17.75308945 | Down | 0         | 0          | AAEL006011-PA OS=Aedes aegypti GN=AAEL006011 PE=4 SV=1                                   |
| CCG001151.1 | 510  | 1296 | 0 | 109.193679 | 0.001       | -16.73652981 | Down | 0         | 0          | -                                                                                        |
| CCG016951.1 | 423  | 1422 | 0 | 144.451448 | 0.001       | -17.14022514 | Down | 0         | 0          | -                                                                                        |
| CCG002949.1 | 1251 | 1624 | 0 | 55.7816539 | 0.001       | -15.76750309 | Down | 0         | 0          | AAEL007281-PA OS=Aedes aegypti GN=AAEL007281 PE=4 SV=1                                   |
| CCG020274.1 | 381  | 1719 | 0 | 193.871322 | 0.001       | -17.56473989 | Down | 0         | 0          | Cuticle protein OS=Culex quinquefasciatus GN=CpipJ_CPIJ003476 PE=4 SV=1                  |
| CCG014380.1 | 1623 | 1833 | 0 | 48.5295894 | 0.001       | -15.56657703 | Down | 0         | 0          | Cytosol aminopeptidase OS=Culex quinquefasciatus GN=CpipJ_CPIJ000990 PE=4 SV=1           |
| CCG017832.1 | 564  | 1917 | 0 | 146.051385 | 0.001       | -17.15611652 | Down | 0         | 0          | Putative uncharacterized protein OS=Culex quinquefasciatus GN=CpipJ_CPIJ010091 PE=4 SV=1 |
| CCG008430.1 | 684  | 2013 | 0 | 126.459175 | 0.001       | -16.94831219 | Down | 0         | 0          | AAEL008779-PA OS=Aedes aegypti GN=AAEL008779 PE=4 SV=1                                   |
| CCG016570.1 | 636  | 2398 | 0 | 162.014817 | 0.001       | -17.30576623 | Down | 0         | 0          | AAEL010164-PA OS=Aedes aegypti GN=AAEL010164 PE=4 SV=1                                   |
| CCG014935.1 | 1245 | 2947 | 0 | 101.712296 | 0.001       | -16.63413456 | Down | 0         | 0          | AAEL002000-PA OS=Aedes aegypti GN=AAEL002000 PE=3 SV=1                                   |
| CCG026683.1 | 1407 | 3202 | 0 | 97.7889767 | 0.001       | -16.57738423 | Down | 0         | 0          | AAEL003308-PA (Fragment) OS=Aedes aegypti GN=AAEL003308 PE=3 SV=1                        |
| CCG026789.1 | 1485 | 4650 | 0 | 134.551694 | 0.001       | -17.03780103 | Down | 0         | 0          | -                                                                                        |
| CCG024282.1 | 636  | 5918 | 0 | 399.834732 | 0.001       | -18.60904427 | Down | 0         | 0          | -                                                                                        |
| CCG025834.1 | 471  | 12   | 1 | 1.09477031 | 0.074221394 | -3.882649297 | Down | 0.0004866 | 0.00076472 | AAEL002180-PA OS=Aedes aegypti GN=AAEL002180 PE=4 SV=1                                   |
| CCG012344.1 | 177  | 12   | 1 | 2.91320235 | 0.197504389 | -3.882649297 | Down | 0.0004866 | 0.00076463 | -                                                                                        |
| CCG022944.1 | 1077 | 12   | 1 | 0.47877142 | 0.032458939 | -3.882649297 | Down | 0.0004866 | 0.00076468 | Putative uncharacterized protein OS=Culex quinquefasciatus GN=CpipJ_CPIJ016112 PE=4 SV=1 |
| CCG021308.1 | 558  | 13   | 1 | 1.00108701 | 0.062649242 | -3.998126514 | Down | 0.000233  | 0.00037322 | AAEL001290-PA OS=Aedes aegypti GN=AAEL001290 PE=4 SV=1                                   |

|             |      |    |   |            |             |              |      |           |            |                                                                             |
|-------------|------|----|---|------------|-------------|--------------|------|-----------|------------|-----------------------------------------------------------------------------|
| CCG022613.1 | 384  | 13 | 1 | 1.45470456 | 0.091037179 | -3.998126514 | Down | 0.000233  | 0.00037324 | AAEL002022-PA OS=Aedes aegypti GN=AAEL002022 PE=4 SV=1                      |
| CCG014571.1 | 1056 | 14 | 1 | 0.56967451 | 0.033104429 | -4.105041718 | Down | 0.0001111 | 0.00018099 | AAEL005490-PA OS=Aedes aegypti GN=AAEL005490 PE=4 SV=1                      |
| CCG017208.1 | 1017 | 14 | 1 | 0.59152044 | 0.03437392  | -4.105041718 | Down | 0.0001111 | 0.000181   | AAEL001491-PA OS=Aedes aegypti GN=AAEL001491 PE=4 SV=1                      |
| CCG021678.1 | 531  | 15 | 1 | 1.21383431 | 0.065834796 | -4.204577392 | Down | 5.28E-05  | 8.83E-05   | AAEL003069-PA OS=Aedes aegypti GN=AAEL003069 PE=4 SV=1                      |
| CCG005618.1 | 522  | 15 | 1 | 1.23476249 | 0.066969879 | -4.204577392 | Down | 5.28E-05  | 8.82E-05   | AAEL010040-PA OS=Aedes aegypti GN=AAEL010040 PE=4 SV=1                      |
| CCG016938.1 | 372  | 15 | 1 | 1.73265059 | 0.093973862 | -4.204577392 | Down | 5.28E-05  | 8.83E-05   | AAEL002191-PA OS=Aedes aegypti GN=AAEL002191 PE=4 SV=1                      |
| CCG017549.1 | 3555 | 15 | 1 | 0.1813069  | 0.009833552 | -4.204577392 | Down | 5.28E-05  | 8.83E-05   | Carboxypeptidase AT OS=Culex quinquefasciatus GN=CpipJ_CPIJ007169 PE=3 SV=1 |
| CCG028567.1 | 300  | 15 | 1 | 2.14848673 | 0.116527589 | -4.204577392 | Down | 5.28E-05  | 8.83E-05   | AAEL005157-PA (Fragment) OS=Aedes aegypti GN=AAEL005157 PE=4 SV=1           |
| CCG017908.1 | 321  | 16 | 1 | 2.14179363 | 0.108904289 | -4.297686796 | Down | 2.50E-05  | 4.29E-05   | -                                                                           |
| CCG026455.1 | 1119 | 16 | 1 | 0.61440192 | 0.031240641 | -4.297686796 | Down | 2.50E-05  | 4.29E-05   | AAEL006817-PA OS=Aedes aegypti GN=AAEL006817 PE=4 SV=1                      |
| CCG028306.1 | 213  | 17 | 1 | 3.42950934 | 0.164123365 | -4.385149637 | Down | 1.18E-05  | 2.06E-05   | AAEL003475-PA OS=Aedes aegypti GN=AAEL003475 PE=3 SV=1                      |
| CCG001156.1 | 945  | 17 | 1 | 0.77300052 | 0.036992885 | -4.385149637 | Down | 1.18E-05  | 2.06E-05   | AAEL008205-PA OS=Aedes aegypti GN=AAEL008205 PE=4 SV=1                      |
| CCG007564.1 | 399  | 17 | 1 | 1.8307907  | 0.087614729 | -4.385149637 | Down | 1.18E-05  | 2.06E-05   | -                                                                           |
| CCG015404.1 | 579  | 18 | 1 | 1.33584667 | 0.060376989 | -4.467611798 | Down | 5.57E-06  | 9.89E-06   | AAEL004293-PA OS=Aedes aegypti GN=AAEL004293 PE=4 SV=1                      |
| CCG014958.1 | 510  | 18 | 1 | 1.51657887 | 0.068545641 | -4.467611798 | Down | 5.57E-06  | 9.89E-06   | -                                                                           |
| CCG001214.1 | 753  | 22 | 1 | 1.25542385 | 0.046425334 | -4.757118415 | Down | 2.69E-07  | 5.06E-07   | AAEL004996-PA OS=Aedes aegypti GN=AAEL004996 PE=3 SV=1                      |
| CCG013340.1 | 1509 | 22 | 1 | 0.62646399 | 0.023166519 | -4.757118415 | Down | 2.69E-07  | 5.06E-07   | AAEL003775-PA OS=Aedes aegypti GN=CYP325R1 PE=3 SV=1                        |

|             |      |    |   |            |             |              |      |          |          |                                                                                              |
|-------------|------|----|---|------------|-------------|--------------|------|----------|----------|----------------------------------------------------------------------------------------------|
| CCG011467.1 | 528  | 26 | 1 | 2.1159339  | 0.066208858 | -4.998126514 | Down | 1.27E-08 | 2.52E-08 | Putative uncharacterized protein OS=Culex quinquefasciatus GN=CpipJ_CPIJ013074 PE=4 SV=1     |
| CCG014451.1 | 1728 | 26 | 1 | 0.64653536 | 0.020230484 | -4.998126514 | Down | 1.27E-08 | 2.52E-08 | AAEL009193-PA OS=Aedes aegypti GN=AAEL009193 PE=3 SV=1                                       |
| CCG020953.1 | 1376 | 26 | 1 | 0.81192812 | 0.025405724 | -4.998126514 | Down | 1.27E-08 | 2.52E-08 | Putative uncharacterized protein GLEAN_08496 OS=Tribolium castaneum GN=GLEAN_08496 PE=4 SV=1 |
| CCG020974.1 | 750  | 26 | 1 | 1.48961747 | 0.046611036 | -4.998126514 | Down | 1.27E-08 | 2.52E-08 | AAEL002919-PA OS=Aedes aegypti GN=AAEL002919 PE=4 SV=1                                       |
| CCG006053.1 | 513  | 27 | 1 | 2.26156498 | 0.068144789 | -5.052574298 | Down | 5.87E-09 | 1.18E-08 | AAEL014135-PA OS=Aedes aegypti GN=AAEL014135 PE=4 SV=1                                       |
| CCG020883.1 | 1857 | 27 | 1 | 0.62476189 | 0.018825136 | -5.052574298 | Down | 5.87E-09 | 1.18E-08 | AGAP013374-PA OS=Anopheles gambiae GN=AgaP_AGAP013374 PE=4 SV=1                              |
| CCG000149.1 | 690  | 27 | 1 | 1.6814244  | 0.050664169 | -5.052574298 | Down | 5.87E-09 | 1.18E-08 | AAEL014993-PA OS=Aedes aegypti GN=AAEL014993 PE=4 SV=1                                       |
| CCG028271.1 | 1088 | 29 | 1 | 1.145333   | 0.032130769 | -5.155667791 | Down | 1.26E-09 | 2.60E-09 | -                                                                                            |
| CCG016802.2 | 213  | 29 | 1 | 5.85033945 | 0.164123365 | -5.155667791 | Down | 1.26E-09 | 2.60E-09 | -                                                                                            |
| CCG023995.1 | 207  | 31 | 1 | 6.43508103 | 0.168880564 | -5.251883107 | Down | 2.70E-10 | 5.68E-10 | AAEL005316-PA OS=Aedes aegypti GN=AAEL005316 PE=4 SV=1                                       |
| CCG012266.1 | 328  | 31 | 1 | 4.06116394 | 0.106580112 | -5.251883107 | Down | 2.70E-10 | 5.68E-10 | -                                                                                            |
| CCG019299.1 | 351  | 32 | 1 | 3.91746868 | 0.09959623  | -5.297686796 | Down | 1.25E-10 | 2.66E-10 | AAEL001801-PA OS=Aedes aegypti GN=AAEL001801 PE=4 SV=1                                       |
| CCG004896.1 | 447  | 33 | 1 | 3.17226229 | 0.078206436 | -5.342080916 | Down | 5.75E-11 | 1.24E-10 | AAEL011685-PA OS=Aedes aegypti GN=AAEL011685 PE=4 SV=1                                       |
| CCG005780.1 | 309  | 33 | 1 | 4.58900078 | 0.113133582 | -5.342080916 | Down | 5.75E-11 | 1.24E-10 | AAEL013161-PA OS=Aedes aegypti GN=AAEL013161 PE=3 SV=1                                       |
| CCG024787.1 | 366  | 34 | 1 | 3.99172398 | 0.095514417 | -5.385149637 | Down | 2.65E-11 | 5.78E-11 | AAEL011906-PA OS=Aedes aegypti GN=AAEL011906 PE=3 SV=1                                       |
| CCG013146.1 | 854  | 35 | 1 | 1.7610547  | 0.04093475  | -5.426969813 | Down | 1.22E-11 | 2.71E-11 | Putative uncharacterized protein OS=Aedes aegypti PE=4 SV=1                                  |
| CCG021512.1 | 1068 | 37 | 1 | 1.48865185 | 0.032732469 | -5.507140162 | Down | 2.59E-12 | 6.09E-12 | AAEL001333-PA OS=Aedes aegypti GN=AAEL001333 PE=4 SV=1                                       |

|             |      |     |   |            |             |              |      |          |          |                                                                                          |
|-------------|------|-----|---|------------|-------------|--------------|------|----------|----------|------------------------------------------------------------------------------------------|
| CCG013025.1 | 319  | 40  | 1 | 5.3880545  | 0.109587075 | -5.619614891 | Down | 2.51E-13 | 7.06E-13 | -                                                                                        |
| CCG017840.1 | 357  | 45  | 1 | 5.4163531  | 0.097922344 | -5.789539893 | Down | 5.10E-15 | 1.84E-14 | AAEL002878-PA OS=Aedes aegypti GN=AAEL002878 PE=4 SV=1                                   |
| CCG003575.1 | 339  | 45  | 1 | 5.70394707 | 0.10312176  | -5.789539893 | Down | 5.10E-15 | 1.84E-14 | Putative uncharacterized protein OS=Culex quinquefasciatus GN=CpipJ_CPIJ012243 PE=4 SV=1 |
| CCG021556.1 | 1170 | 61  | 1 | 2.2403024  | 0.029878869 | -6.228424134 | Down | 1.83E-20 | 7.17E-20 | AAEL008325-PA OS=Aedes aegypti GN=AAEL008325 PE=4 SV=1                                   |
| CCG004992.1 | 561  | 90  | 1 | 6.89354031 | 0.062314219 | -6.789539893 | Down | 2.13E-30 | 9.01E-30 | AAEL006357-PA OS=Aedes aegypti GN=AAEL006357 PE=4 SV=1                                   |
| CCG011671.1 | 441  | 105 | 1 | 10.2308892 | 0.079270469 | -7.011932314 | Down | 1.49E-35 | 6.46E-35 | -                                                                                        |
| CCG010282.1 | 921  | 106 | 1 | 4.9454852  | 0.037956869 | -7.025607251 | Down | 6.73E-36 | 2.93E-35 | Ams protein transcript variant 1 (Fragment) OS=Aedes aegypti PE=2 SV=1                   |
| CCG017393.1 | 792  | 123 | 1 | 6.67333    | 0.044139238 | -7.240201302 | Down | 9.38E-42 | 4.22E-41 | AAEL006758-PA OS=Aedes aegypti GN=AAEL006758 PE=4 SV=1                                   |
| CCG002913.1 | 1626 | 135 | 1 | 3.56759789 | 0.021499555 | -7.374502393 | Down | 6.83E-46 | 3.13E-45 | -                                                                                        |
| CCG021030.1 | 1260 | 135 | 1 | 4.60390014 | 0.027744664 | -7.374502393 | Down | 6.83E-46 | 3.13E-45 | Lipase OS=Aedes aegypti GN=AAEL012342 PE=3 SV=1                                          |
| CCG023716.1 | 531  | 139 | 1 | 11.2481979 | 0.065834796 | -7.416627869 | Down | 2.84E-47 | 1.31E-46 | -                                                                                        |
| CCG009182.1 | 381  | 150 | 1 | 16.9172184 | 0.091754007 | -7.526505487 | Down | 4.54E-51 | 2.12E-50 | AAEL000680-PA OS=Aedes aegypti GN=AAEL000680 PE=4 SV=1                                   |
| CCG023166.1 | 522  | 163 | 1 | 13.4177524 | 0.066969879 | -7.64641495  | Down | 1.47E-55 | 6.98E-55 | -                                                                                        |
| CCG027991.1 | 756  | 167 | 1 | 9.49199164 | 0.046241107 | -7.681391089 | Down | 6.08E-57 | 2.91E-56 | AAEL006414-PA OS=Aedes aegypti GN=AAEL006414 PE=3 SV=1                                   |
| CCG002290.1 | 486  | 171 | 1 | 15.1189807 | 0.071930611 | -7.715539311 | Down | 2.52E-58 | 1.21E-57 | -                                                                                        |
| CCG028512.1 | 816  | 178 | 1 | 9.37329995 | 0.042841025 | -7.773420227 | Down | 9.59E-61 | 4.64E-60 | AAEL000725-PA OS=Aedes aegypti GN=AAEL000725 PE=4 SV=1                                   |
| CCG014453.1 | 1890 | 203 | 1 | 4.61526779 | 0.018496443 | -7.963022713 | Down | 2.16E-69 | 1.07E-68 | AAEL009204-PA OS=Aedes aegypti GN=AAEL009204 PE=3 SV=1                                   |
| CCG010212.1 | 396  | 207 | 1 | 22.4614522 | 0.088278477 | -7.991173754 | Down | 8.92E-71 | 4.43E-70 | -                                                                                        |
| CCG005574.1 | 249  | 210 | 1 | 36.2395352 | 0.140394686 | -8.011932314 | Down | 8.17E-72 | 4.07E-71 | -                                                                                        |
| CCG019431.1 | 999  | 211 | 1 | 9.07568969 | 0.03499327  | -8.018785985 | Down | 3.68E-72 | 1.83E-71 | AAEL005714-PA (Fragment) OS=Aedes aegypti GN=AAEL005714 PE=4 SV=1                        |

|             |      |      |   |            |             |              |      |           |           |                                                                                 |
|-------------|------|------|---|------------|-------------|--------------|------|-----------|-----------|---------------------------------------------------------------------------------|
| CCG003506.1 | 228  | 220  | 1 | 41.4620246 | 0.153325775 | -8.07904651  | Down | 2.82E-75  | 1.42E-74  | -                                                                               |
| CCG026509.1 | 1008 | 259  | 1 | 11.0408346 | 0.03468083  | -8.314495084 | Down | 8.77E-89  | 4.55E-88  | AAEL010886-PA OS=Aedes<br>aegypti GN=AAEL010886 PE=4<br>SV=1                    |
| CCG012757.1 | 573  | 308  | 1 | 23.0971697 | 0.061009209 | -8.564473337 | Down | 9.09E-106 | 4.85E-105 | AAEL008754-PA OS=Aedes<br>aegypti GN=AAEL008754 PE=4<br>SV=1                    |
| CCG026055.1 | 360  | 321  | 1 | 38.31468   | 0.097106324 | -8.624116283 | Down | 2.82E-110 | 1.52E-109 | AAEL012715-PA OS=Aedes<br>aegypti GN=AAEL012715 PE=4<br>SV=1                    |
| CCG013939.1 | 1143 | 341  | 1 | 12.8194921 | 0.030584669 | -8.711314725 | Down | 3.26E-117 | 1.78E-116 | AAEL014193-PA OS=Aedes<br>aegypti GN=AAEL014193 PE=4<br>SV=1                    |
| CCG001525.1 | 666  | 355  | 1 | 22.904288  | 0.052489905 | -8.769362011 | Down | 4.54E-122 | 2.49E-121 | -                                                                               |
| CCG004697.1 | 780  | 358  | 1 | 19.7220064 | 0.044818304 | -8.781502573 | Down | 4.13E-123 | 2.27E-122 | -                                                                               |
| CCG005142.1 | 1413 | 448  | 1 | 13.6238083 | 0.024740465 | -9.105041718 | Down | 2.40E-154 | 1.37E-153 | AAEL010365-PA OS=Aedes<br>aegypti GN=AAEL010365 PE=4<br>SV=1                    |
| CCG016891.1 | 204  | 455  | 1 | 95.8393591 | 0.171364102 | -9.127409531 | Down | 8.90E-157 | 5.10E-156 | AGAP003937-PC OS=Anopheles<br>gambiae GN=AgaP_AGAP003937<br>PE=4 SV=1           |
| CCG016995.1 | 1008 | 503  | 1 | 21.4422386 | 0.03468083  | -9.272101386 | Down | 1.91E-173 | 1.11E-172 | AAEL010886-PA OS=Aedes<br>aegypti GN=AAEL010886 PE=4<br>SV=1                    |
| CCG010562.1 | 450  | 534  | 1 | 50.9907517 | 0.077685059 | -9.358382728 | Down | 3.28E-184 | 1.93E-183 | AAEL005891-PA OS=Aedes<br>aegypti GN=AAEL005891 PE=4<br>SV=1                    |
| CCG019955.1 | 420  | 813  | 1 | 83.1771291 | 0.083233992 | -9.964798338 | Down | 3.67E-281 | 2.29E-280 | AAEL012573-PA OS=Aedes<br>aegypti GN=AAEL012573 PE=4<br>SV=1                    |
| CCG026112.1 | 1161 | 1123 | 1 | 41.5633178 | 0.030110488 | -10.43082901 | Down | 0         | 0         | AAEL009025-PA OS=Aedes<br>aegypti GN=AAEL009025 PE=4<br>SV=1                    |
| CCG006909.1 | 1056 | 1492 | 1 | 60.7110266 | 0.033104429 | -10.84071862 | Down | 0         | 0         | AAEL010114-PA OS=Aedes<br>aegypti GN=AAEL010114 PE=4<br>SV=1                    |
| CCG002228.1 | 1188 | 1601 | 1 | 57.9078663 | 0.029426159 | -10.94244439 | Down | 0         | 0         | AAEL002715-PA OS=Aedes<br>aegypti GN=SRPN22 PE=3 SV=1                           |
| CCG023196.1 | 1245 | 1699 | 1 | 58.6390194 | 0.028078937 | -11.02815693 | Down | 0         | 0         | AAEL002000-PA OS=Aedes<br>aegypti GN=AAEL002000 PE=3<br>SV=1                    |
| CCG005291.1 | 549  | 1722 | 1 | 134.779386 | 0.063676278 | -11.04755622 | Down | 0         | 0         | Cuicle protein OS=Culex<br>quinquefasciatus<br>GN=CpipJ_CPIJ003477 PE=4<br>SV=1 |
| CCG017756.1 | 1269 | 1748 | 1 | 59.189201  | 0.027547893 | -11.06917627 | Down | 0         | 0         | AAEL010882-PA OS=Aedes<br>aegypti GN=AAEL010882 PE=4<br>SV=1                    |

|             |      |      |   |            |             |              |      |           |            |                                                                                                   |
|-------------|------|------|---|------------|-------------|--------------|------|-----------|------------|---------------------------------------------------------------------------------------------------|
| CCG006118.1 | 1608 | 7043 | 1 | 188.206369 | 0.021740222 | -13.07966116 | Down | 0         | 0          | AAEL006975-PA (Fragment)<br>OS=Aedes aegypti<br>GN=AAEL006975 PE=4 SV=1                           |
| CCG008175.1 | 239  | 14   | 2 | 2.51705558 | 0.292537881 | -3.105041718 | Down | 0.0005487 | 0.00085961 | -                                                                                                 |
| CCG028426.1 | 1281 | 14   | 2 | 0.46961459 | 0.054579667 | -3.105041718 | Down | 0.0005487 | 0.00085966 | Reverse transcriptase OS=Aedes<br>aegypti GN=pol PE=4 SV=1                                        |
| CCG004223.1 | 777  | 14   | 2 | 0.77422945 | 0.089982694 | -3.105041718 | Down | 0.0005487 | 0.00085982 | AGAP003797-PA OS=Anopheles<br>gambiae GN=AGAP003797 PE=4<br>SV=1                                  |
| CCG012202.1 | 1365 | 14   | 2 | 0.44071523 | 0.051220918 | -3.105041718 | Down | 0.0005487 | 0.00085972 | AAEL014617-PA OS=Aedes<br>aegypti GN=CYP9J28 PE=3 SV=1                                            |
| CCG016812.1 | 720  | 14   | 2 | 0.83552262 | 0.097106324 | -3.105041718 | Down | 0.0005487 | 0.00085977 | AAEL008660-PA (Fragment)<br>OS=Aedes aegypti<br>GN=AAEL008660 PE=4 SV=1                           |
| CCG009296.1 | 2523 | 15   | 2 | 0.2554681  | 0.027711674 | -3.204577392 | Down | 0.0002753 | 0.00043902 | AGAP002803-PA OS=Anopheles<br>gambiae GN=AgaP_AGAP002803<br>PE=4 SV=2                             |
| CCG005048.1 | 1058 | 15   | 2 | 0.60921174 | 0.066083699 | -3.204577392 | Down | 0.0002753 | 0.00043899 | Putative uncharacterized protein<br>OS=Culex quinquefasciatus<br>GN=CpipJ_CPIJ018804 PE=4<br>SV=1 |
| CCG023862.1 | 465  | 16   | 2 | 1.4785285  | 0.15035818  | -3.297686796 | Down | 0.0001373 | 0.0002225  | -                                                                                                 |
| CCG007278.1 | 433  | 16   | 2 | 1.5877962  | 0.161470101 | -3.297686796 | Down | 0.0001373 | 0.00022249 | Uncharacterized protein<br>OS=Anopheles darlingi<br>GN=AND_04255 PE=4 SV=1                        |
| CCG014482.1 | 1130 | 17   | 2 | 0.64644733 | 0.061873056 | -3.385149637 | Down | 6.81E-05  | 0.00011305 | Uncharacterized protein<br>OS=Anopheles darlingi<br>GN=AND_11211 PE=4 SV=1                        |
| CCG001130.1 | 513  | 17   | 2 | 1.42394832 | 0.136289578 | -3.385149637 | Down | 6.81E-05  | 0.00011305 | Putative 67B2 family heat shock<br>protein OS=Aedes albopictus<br>PE=2 SV=1                       |
| CCG020294.1 | 363  | 17   | 2 | 2.01235672 | 0.192607586 | -3.385149637 | Down | 6.81E-05  | 0.00011304 | AAEL017144-PA OS=Aedes<br>aegypti PE=4 SV=1                                                       |
| CCG007560.1 | 409  | 18   | 2 | 1.89108856 | 0.170945119 | -3.467611798 | Down | 3.36E-05  | 5.69E-05   | -                                                                                                 |
| CCG017726.1 | 690  | 18   | 2 | 1.1209496  | 0.101328338 | -3.467611798 | Down | 3.36E-05  | 5.69E-05   | AAEL006280-PA OS=Aedes<br>aegypti GN=AAEL006280 PE=2<br>SV=1                                      |

|             |      |    |   |            |             |              |      |          |          |                                                                               |
|-------------|------|----|---|------------|-------------|--------------|------|----------|----------|-------------------------------------------------------------------------------|
| CCG002655.1 | 405  | 18 | 2 | 1.90976598 | 0.172633466 | -3.467611798 | Down | 3.36E-05 | 5.69E-05 | AAEL009489-PA OS=Aedes aegypti GN=AAEL009489 PE=4 SV=1                        |
| CCG010515.1 | 906  | 19 | 2 | 0.9011313  | 0.077170589 | -3.54561431  | Down | 1.65E-05 | 2.85E-05 | AAEL009792-PA OS=Aedes aegypti GN=AAEL009792 PE=4 SV=1                        |
| CCG018128.1 | 468  | 19 | 2 | 1.74449777 | 0.149394345 | -3.54561431  | Down | 1.65E-05 | 2.85E-05 | AAEL002383-PA OS=Aedes aegypti GN=AAEL002383 PE=4 SV=1                        |
| CCG015679.1 | 423  | 19 | 2 | 1.93008264 | 0.165287361 | -3.54561431  | Down | 1.65E-05 | 2.85E-05 | AAEL008483-PA OS=Aedes aegypti GN=AAEL008483 PE=4 SV=1                        |
| CCG005128.1 | 456  | 19 | 2 | 1.79040561 | 0.153325775 | -3.54561431  | Down | 1.65E-05 | 2.85E-05 | Putative uncharacterized protein OS=Aedes aegypti PE=4 SV=1                   |
| CCG012917.1 | 2907 | 20 | 2 | 0.29562941 | 0.024051102 | -3.619614891 | Down | 8.09E-06 | 1.43E-05 | Putative uncharacterized protein OS=Drosophila melanogaster GN=ORF1 PE=4 SV=1 |
| CCG007260.1 | 1479 | 20 | 2 | 0.5810647  | 0.047272856 | -3.619614891 | Down | 8.09E-06 | 1.43E-05 | AAEL011770-PA OS=Aedes aegypti GN=CYP325L1 PE=3 SV=1                          |
| CCG019781.1 | 1077 | 20 | 2 | 0.79795236 | 0.064917877 | -3.619614891 | Down | 8.09E-06 | 1.43E-05 | Hypothetical conserved protein OS=Aedes aegypti PE=2 SV=1                     |
| CCG027804.1 | 1122 | 20 | 2 | 0.76594892 | 0.062314219 | -3.619614891 | Down | 8.09E-06 | 1.43E-05 | Leucine rich protein OS=Culex quinquefasciatus GN=CpipJ_CPIJ000810 PE=4 SV=1  |
| CCG024431.1 | 2802 | 21 | 2 | 0.32204298 | 0.024952375 | -3.690004219 | Down | 3.95E-06 | 7.07E-06 | AAEL013366-PA (Fragment) OS=Aedes aegypti GN=AAEL013366 PE=4 SV=1             |
| CCG022928.1 | 1017 | 21 | 2 | 0.88728066 | 0.06874784  | -3.690004219 | Down | 3.95E-06 | 7.07E-06 | AAEL001491-PA OS=Aedes aegypti GN=AAEL001491 PE=4 SV=1                        |
| CCG016035.1 | 438  | 22 | 2 | 2.15829717 | 0.159626835 | -3.757118415 | Down | 1.92E-06 | 3.49E-06 | Uncharacterized protein OS=Anopheles darlingi GN=AND_09803 PE=4 SV=1          |
| CCG021766.1 | 426  | 22 | 2 | 2.21909428 | 0.164123365 | -3.757118415 | Down | 1.92E-06 | 3.49E-06 | -                                                                             |
| CCG003508.1 | 543  | 23 | 2 | 1.82008084 | 0.128759767 | -3.821248752 | Down | 9.30E-07 | 1.72E-06 | AAEL001552-PA OS=Aedes aegypti GN=AAEL001552 PE=4 SV=1                        |
| CCG004273.1 | 894  | 23 | 2 | 1.10548534 | 0.078206436 | -3.821248752 | Down | 9.30E-07 | 1.72E-06 | AAEL011014-PA OS=Aedes aegypti GN=AAEL011014 PE=4 SV=1                        |
| CCG020914.1 | 1047 | 23 | 2 | 0.94393877 | 0.066777988 | -3.821248752 | Down | 9.30E-07 | 1.72E-06 | AAEL004031-PA OS=Aedes aegypti GN=AAEL004031 PE=4 SV=1                        |



|             |      |    |   |            |             |              |      |          |          |                                                                                                                             |
|-------------|------|----|---|------------|-------------|--------------|------|----------|----------|-----------------------------------------------------------------------------------------------------------------------------|
| CCG013052.1 | 594  | 24 | 2 | 1.73615089 | 0.117704636 | -3.882649297 | Down | 4.50E-07 | 8.40E-07 | Putative uncharacterized protein<br>OS=Culex quinquefasciatus<br>GN=CpipJ_CPIJ002324 PE=4<br>SV=1                           |
| CCG023057.1 | 468  | 25 | 2 | 2.29539181 | 0.149394345 | -3.941542986 | Down | 2.17E-07 | 4.10E-07 | AAEL005222-PA OS=Aedes<br>aegypti GN=AAEL005222 PE=4<br>SV=1                                                                |
| CCG015281.1 | 423  | 25 | 2 | 2.53958242 | 0.165287361 | -3.941542986 | Down | 2.17E-07 | 4.10E-07 | -                                                                                                                           |
| CCG007790.1 | 309  | 25 | 2 | 3.47651575 | 0.226267164 | -3.941542986 | Down | 2.17E-07 | 4.10E-07 | -                                                                                                                           |
| CCG002956.1 | 516  | 26 | 2 | 2.16514167 | 0.135497197 | -3.998126514 | Down | 1.04E-07 | 2.00E-07 | AAEL003442-PA OS=Aedes<br>aegypti GN=AAEL003442 PE=4<br>SV=1                                                                |
| CCG003292.1 | 537  | 26 | 2 | 2.08047132 | 0.130198424 | -3.998126514 | Down | 1.04E-07 | 2.00E-07 | Putative uncharacterized protein<br>OS=Culex quinquefasciatus<br>GN=CpipJ_CPIJ003408 PE=4<br>SV=1                           |
| CCG023489.1 | 1569 | 28 | 2 | 0.76682764 | 0.04456122  | -4.105041718 | Down | 2.39E-08 | 4.71E-08 | AAEL000512-PA OS=Aedes<br>aegypti GN=AAEL000512 PE=4<br>SV=1                                                                |
| CCG003564.1 | 942  | 29 | 2 | 1.32284746 | 0.074221394 | -4.155667791 | Down | 1.14E-08 | 2.28E-08 | AAEL001318-PA OS=Aedes<br>aegypti GN=AAEL001318 PE=4<br>SV=1                                                                |
| CCG028269.1 | 993  | 29 | 2 | 1.25490665 | 0.070409419 | -4.155667791 | Down | 1.14E-08 | 2.28E-08 | AAEL004705-PA OS=Aedes<br>aegypti GN=AAEL004705 PE=4<br>SV=1                                                                |
| CCG003832.1 | 600  | 31 | 2 | 2.22010295 | 0.116527589 | -4.251883107 | Down | 2.59E-09 | 5.29E-09 | AAEL009881-PA OS=Aedes<br>aegypti GN=AAEL009881 PE=4<br>SV=1                                                                |
| CCG009217.1 | 510  | 31 | 2 | 2.61188583 | 0.137091281 | -4.251883107 | Down | 2.59E-09 | 5.29E-09 | -                                                                                                                           |
| CCG017743.1 | 822  | 32 | 2 | 1.67278772 | 0.085056634 | -4.297686796 | Down | 1.23E-09 | 2.54E-09 | NADH dehydrogenase iron-sulfur<br>protein 3, mitochondrial OS=Culex<br>quinquefasciatus<br>GN=CpipJ_CPIJ013503 PE=3<br>SV=1 |
| CCG018967.1 | 324  | 32 | 2 | 4.24392441 | 0.215791832 | -4.297686796 | Down | 1.23E-09 | 2.54E-09 | -                                                                                                                           |
| CCG025476.1 | 1032 | 33 | 2 | 1.37403221 | 0.067748598 | -4.342080916 | Down | 5.84E-10 | 1.22E-09 | AAEL002915-PA OS=Aedes<br>aegypti GN=AAEL002915 PE=4<br>SV=1                                                                |
| CCG010945.1 | 849  | 34 | 2 | 1.72081387 | 0.082351653 | -4.385149637 | Down | 2.77E-10 | 5.82E-10 | Mariner Mos1 transposase<br>OS=Acromyrmex echinatio<br>GN=G5I_10332 PE=4 SV=1                                               |
| CCG001689.1 | 390  | 34 | 2 | 3.74607943 | 0.179273214 | -4.385149637 | Down | 2.77E-10 | 5.82E-10 | AAEL014975-PA OS=Aedes<br>aegypti GN=AAEL014975 PE=4<br>SV=1                                                                |
| CCG008367.1 | 879  | 34 | 2 | 1.66208302 | 0.079541017 | -4.385149637 | Down | 2.77E-10 | 5.82E-10 | AAEL010413-PA OS=Aedes<br>aegypti GN=AAEL010413 PE=4<br>SV=1                                                                |

|             |      |    |   |            |             |              |      |          |          |                                                        |
|-------------|------|----|---|------------|-------------|--------------|------|----------|----------|--------------------------------------------------------|
| CCG027832.1 | 363  | 35 | 2 | 4.14308736 | 0.192607586 | -4.426969813 | Down | 1.31E-10 | 2.79E-10 | AAEL017144-PA OS=Aedes aegypti PE=4 SV=1               |
| CCG022401.1 | 885  | 36 | 2 | 1.74792141 | 0.079001755 | -4.467611798 | Down | 6.18E-11 | 1.33E-10 | AAEL001043-PA OS=Aedes aegypti GN=AAEL001045 PE=4 SV=1 |
| CCG026197.1 | 561  | 37 | 2 | 2.83401102 | 0.124628438 | -4.507140162 | Down | 2.92E-11 | 6.34E-11 | AAEL014103-PA OS=Aedes aegypti GN=AAEL014103 PE=4 SV=1 |
| CCG020912.1 | 1863 | 40 | 2 | 0.92259226 | 0.037529014 | -4.619614891 | Down | 3.04E-12 | 7.12E-12 | AAEL004003-PA OS=Aedes aegypti GN=AAEL004003 PE=3 SV=1 |
| CCG003635.1 | 810  | 42 | 2 | 2.22806031 | 0.086316733 | -4.690004219 | Down | 6.69E-13 | 1.69E-12 | AAEL009485-PA OS=Aedes aegypti GN=AAEL009485 PE=4 SV=1 |
| CCG027810.1 | 2544 | 42 | 2 | 0.709406   | 0.027482922 | -4.690004219 | Down | 6.69E-13 | 1.69E-12 | AAEL010958-PA OS=Aedes aegypti GN=AAEL010958 PE=4 SV=1 |
| CCG020180.1 | 858  | 43 | 2 | 2.15349486 | 0.081487825 | -4.723951551 | Down | 3.14E-13 | 8.62E-13 | AAEL014579-PA OS=Aedes aegypti GN=AAEL014579 PE=3 SV=1 |
| CCG011063.1 | 1863 | 44 | 2 | 1.01485149 | 0.037529014 | -4.757118415 | Down | 1.47E-13 | 4.38E-13 | AAEL004003-PA OS=Aedes aegypti GN=AAEL004003 PE=3 SV=1 |
| CCG009159.1 | 1215 | 51 | 2 | 1.80366787 | 0.057544489 | -4.970112138 | Down | 7.07E-16 | 2.58E-15 | Lipase OS=Aedes aegypti GN=AAEL012349 PE=3 SV=1        |
| CCG024301.1 | 921  | 53 | 2 | 2.4727426  | 0.075913739 | -5.025607251 | Down | 1.53E-16 | 5.75E-16 | AAEL006841-PA OS=Aedes aegypti GN=AAEL006841 PE=4 SV=1 |
| CCG005043.1 | 294  | 56 | 2 | 8.18471135 | 0.237811407 | -5.105041718 | Down | 1.53E-17 | 5.83E-17 | AAEL007735-PA OS=Aedes aegypti GN=AAEL007735 PE=4 SV=1 |
| CCG023884.1 | 351  | 58 | 2 | 7.10041199 | 0.19919246  | -5.155667791 | Down | 3.29E-18 | 1.26E-17 | AAEL001801-PA OS=Aedes aegypti GN=AAEL001801 PE=4 SV=1 |
| CCG008963.1 | 1212 | 59 | 2 | 2.09176101 | 0.057686925 | -5.180329846 | Down | 1.53E-18 | 5.87E-18 | AAEL009325-PA OS=Aedes aegypti GN=AAEL009325 PE=4 SV=1 |
| CCG024678.1 | 1611 | 64 | 2 | 1.70705339 | 0.043399475 | -5.297686796 | Down | 3.24E-20 | 1.27E-19 | AAEL013415-PA OS=Aedes aegypti GN=AAEL013415 PE=4 SV=1 |
| CCG020434.1 | 1566 | 67 | 2 | 1.83842415 | 0.044646586 | -5.363775987 | Down | 3.19E-21 | 1.26E-20 | AAEL003576-PA OS=Aedes aegypti GN=AAEL003576 PE=4 SV=1 |
| CCG000302.1 | 630  | 71 | 2 | 4.84262088 | 0.110978656 | -5.447433916 | Down | 1.44E-22 | 5.74E-22 | AAEL000359-PA OS=Aedes aegypti GN=AAEL000359 PE=4 SV=1 |
| CCG006174.1 | 1104 | 75 | 2 | 2.91913958 | 0.063330212 | -5.526505487 | Down | 6.48E-24 | 2.61E-23 | AAEL011375-PA OS=Aedes aegypti GN=AAEL011375 PE=3 SV=1 |

|             |      |     |   |            |             |              |      |          |          |                                                                                          |
|-------------|------|-----|---|------------|-------------|--------------|------|----------|----------|------------------------------------------------------------------------------------------|
| CCG027801.1 | 1902 | 78  | 2 | 1.76216577 | 0.036759492 | -5.583089015 | Down | 6.31E-25 | 2.56E-24 | AAEL011020-PA OS=Anopheles aegypti GN=AAEL011020 PE=4 SV=1                               |
| CCG027982.1 | 468  | 87  | 2 | 7.98796349 | 0.149394345 | -5.740630292 | Down | 5.73E-28 | 2.38E-27 | -                                                                                        |
| CCG002312.1 | 855  | 89  | 2 | 4.47287296 | 0.081773747 | -5.773420227 | Down | 1.20E-28 | 5.04E-28 | -                                                                                        |
| CCG008063.1 | 3114 | 90  | 2 | 1.24189984 | 0.022452329 | -5.789539893 | Down | 5.52E-29 | 2.32E-28 | Uncharacterized protein OS=Anopheles darlingi GN=AND_00371 PE=4 SV=1                     |
| CCG009968.1 | 438  | 90  | 2 | 8.82939752 | 0.159626835 | -5.789539893 | Down | 5.52E-29 | 2.31E-28 | AAEL010134-PA OS=Anopheles aegypti GN=AAEL010134 PE=4 SV=1                               |
| CCG023488.2 | 2808 | 91  | 2 | 1.3925377  | 0.024899058 | -5.805481436 | Down | 2.53E-29 | 1.06E-28 | AAEL000512-PA OS=Anopheles aegypti GN=AAEL000512 PE=4 SV=1                               |
| CCG025295.1 | 915  | 98  | 2 | 4.60222294 | 0.076411534 | -5.91239664  | Down | 1.07E-31 | 4.54E-31 | -                                                                                        |
| CCG006529.1 | 771  | 107 | 2 | 5.96337432 | 0.090682949 | -6.039153783 | Down | 9.31E-35 | 4.03E-34 | AAEL003030-PA OS=Anopheles aegypti GN=AAEL003030 PE=4 SV=1                               |
| CCG026290.1 | 903  | 108 | 2 | 5.13923736 | 0.07742697  | -6.052574298 | Down | 4.25E-35 | 1.84E-34 | Putative uncharacterized protein OS=Culex quinquefasciatus GN=CpipJ_CPIJ003706 PE=4 SV=1 |
| CCG006435.1 | 711  | 110 | 2 | 6.64791956 | 0.098335518 | -6.07904651  | Down | 8.86E-36 | 3.86E-35 | -                                                                                        |
| CCG005630.1 | 654  | 115 | 2 | 7.55584018 | 0.106906045 | -6.143176847 | Down | 1.76E-37 | 7.73E-37 | AAEL002275-PA OS=Anopheles aegypti GN=AAEL002275 PE=4 SV=1                               |
| CCG000255.1 | 1397 | 122 | 2 | 3.75254662 | 0.05004764  | -6.228424134 | Down | 7.20E-40 | 3.21E-39 | Putative uncharacterized protein OS=Tribolium castaneum GN=TcasGA2_TC004282 PE=4 SV=1    |
| CCG007880.1 | 516  | 137 | 2 | 11.4086311 | 0.135497197 | -6.395718879 | Down | 5.41E-45 | 2.47E-44 | AGAP006830-PA OS=Anopheles gambiae GN=CPR58 PE=4 SV=3                                    |
| CCG010203.1 | 906  | 145 | 2 | 6.87705466 | 0.077170589 | -6.477595886 | Down | 9.92E-48 | 4.58E-47 | Putative uncharacterized protein OS=Culex quinquefasciatus GN=CpipJ_CPIJ003706 PE=4 SV=1 |
| CCG005036.1 | 1869 | 148 | 2 | 3.40263281 | 0.037408536 | -6.507140162 | Down | 9.32E-49 | 4.32E-48 | AAEL000919-PA OS=Anopheles aegypti GN=AAEL000919 PE=4 SV=1                               |
| CCG027811.1 | 168  | 153 | 2 | 39.1331512 | 0.416169962 | -6.555074639 | Down | 1.81E-50 | 8.44E-50 | Uncharacterized protein OS=Anopheles darlingi GN=AND_24739 PE=4 SV=1                     |

|             |      |     |   |            |             |              |      |           |           |                                                                                                   |
|-------------|------|-----|---|------------|-------------|--------------|------|-----------|-----------|---------------------------------------------------------------------------------------------------|
| CCG007707.1 | 1875 | 182 | 2 | 4.17092891 | 0.037288829 | -6.805481436 | Down | 2.03E-60  | 9.83E-60  | Heat shock protein 70 B2<br>OS=Culex quinquefasciatus<br>GN=CpipJ_CPIJ014564 PE=3<br>SV=1         |
| CCG005673.1 | 1389 | 236 | 2 | 7.30083324 | 0.050335892 | -7.180329846 | Down | 5.38E-79  | 2.73E-78  | AAEL005630-PA OS=Aedes<br>aegypti GN=AAEL005630 PE=4<br>SV=1                                      |
| CCG014122.1 | 1872 | 241 | 2 | 5.53189425 | 0.037348586 | -7.210576132 | Down | 1.02E-80  | 5.18E-80  | AAEL000919-PA OS=Aedes<br>aegypti GN=AAEL000919 PE=4<br>SV=1                                      |
| CCG018732.1 | 1416 | 257 | 2 | 7.79888545 | 0.049376097 | -7.303311345 | Down | 3.11E-86  | 1.60E-85  | Uncharacterized protein<br>OS=Anopheles darlingi<br>GN=AND_15514 PE=4 SV=1                        |
| CCG014435.1 | 606  | 272 | 2 | 19.2867456 | 0.115373851 | -7.385149637 | Down | 2.09E-91  | 1.09E-90  | -                                                                                                 |
| CCG007958.1 | 1248 | 279 | 2 | 9.60621471 | 0.056022879 | -7.421808108 | Down | 8.02E-94  | 4.20E-93  | AAEL001713-PA OS=Aedes<br>aegypti GN=AAEL001713 PE=4<br>SV=1                                      |
| CCG021173.1 | 2949 | 280 | 2 | 4.07986629 | 0.023708563 | -7.426969813 | Down | 3.62E-94  | 1.90E-93  | AAEL001340-PA (Fragment)<br>OS=Aedes aegypti<br>GN=AAEL001340 PE=4 SV=1                           |
| CCG018620.1 | 1314 | 293 | 2 | 9.58153139 | 0.053208945 | -7.492443651 | Down | 1.18E-98  | 6.24E-98  | -                                                                                                 |
| CCG009447.1 | 876  | 321 | 2 | 15.7457589 | 0.079813417 | -7.624116283 | Down | 2.53E-108 | 1.36E-107 | AAEL010658-PA OS=Aedes<br>aegypti GN=AAEL010658 PE=4<br>SV=1                                      |
| CCG021523.1 | 426  | 322 | 2 | 32.4794708 | 0.164123365 | -7.628603674 | Down | 1.14E-108 | 6.12E-108 | Putative uncharacterized protein<br>OS=Culex quinquefasciatus<br>GN=CpipJ_CPIJ010703 PE=4<br>SV=1 |
| CCG004722.1 | 1488 | 333 | 2 | 9.61621077 | 0.046986931 | -7.677065163 | Down | 1.80E-112 | 9.74E-112 | AAEL006017-PA OS=Aedes<br>aegypti GN=AAEL006017 PE=4<br>SV=1                                      |
| CCG026991.1 | 1923 | 372 | 2 | 8.31239796 | 0.036358062 | -7.836845607 | Down | 5.95E-126 | 3.28E-125 | AAEL010365-PA OS=Aedes<br>aegypti GN=AAEL010365 PE=4<br>SV=1                                      |
| CCG009637.1 | 825  | 397 | 2 | 20.6775571 | 0.084747338 | -7.930681993 | Down | 1.34E-134 | 7.47E-134 | AAEL013951-PA OS=Aedes<br>aegypti GN=AAEL013951 PE=3<br>SV=1                                      |
| CCG017474.1 | 363  | 437 | 2 | 51.729405  | 0.192607586 | -8.069176266 | Down | 1.92E-148 | 1.09E-147 | -                                                                                                 |
| CCG018621.2 | 1665 | 445 | 2 | 11.4844035 | 0.041991924 | -8.095348322 | Down | 3.27E-151 | 1.86E-150 | -                                                                                                 |
| CCG025854.1 | 1386 | 453 | 2 | 14.0442206 | 0.050444844 | -8.121054036 | Down | 5.55E-154 | 3.17E-153 | AAEL010365-PA OS=Aedes<br>aegypti GN=AAEL010365 PE=4<br>SV=1                                      |
| CCG019703.1 | 516  | 559 | 2 | 46.5505458 | 0.135497197 | -8.424391269 | Down | 1.05E-190 | 6.25E-190 | AAEL013449-PA OS=Aedes<br>aegypti GN=AAEL013449 PE=3<br>SV=1                                      |

|             |      |      |   |            |             |              |      |           |            |                                                                                          |
|-------------|------|------|---|------------|-------------|--------------|------|-----------|------------|------------------------------------------------------------------------------------------|
| CCG007909.1 | 810  | 570  | 2 | 30.2379614 | 0.086316733 | -8.452504905 | Down | 1.62E-194 | 9.63E-194  | AAEL004659-PA OS=Aedes aegypti GN=AAEL004659 PE=4 SV=1                                   |
| CCG027492.1 | 858  | 601  | 2 | 30.0988467 | 0.081487825 | -8.528907977 | Down | 2.90E-205 | 1.74E-204  | -                                                                                        |
| CCG006738.1 | 2055 | 608  | 2 | 12.7131867 | 0.034022654 | -8.54561431  | Down | 1.09E-207 | 6.51E-207  | AAEL003265-PA OS=Aedes aegypti GN=AAEL003265 PE=4 SV=1                                   |
| CCG022601.1 | 633  | 1110 | 2 | 75.3497716 | 0.110452691 | -9.414030757 | Down | 0         | 0          | -                                                                                        |
| CCG012607.1 | 900  | 1135 | 2 | 54.1896098 | 0.077685059 | -9.446163378 | Down | 0         | 0          | AAEL009904-PA OS=Aedes aegypti GN=AAEL009904 PE=4 SV=1                                   |
| CCG023020.1 | 177  | 1172 | 2 | 284.522763 | 0.395008777 | -9.492443651 | Down | 0         | 0          | AAEL006575-PA OS=Aedes aegypti GN=AAEL006575 PE=4 SV=1                                   |
| CCG001594.1 | 744  | 1220 | 2 | 70.461124  | 0.093973862 | -9.550352229 | Down | 0         | 0          | AAEL009239-PA OS=Aedes aegypti GN=AAEL009239 PE=4 SV=1                                   |
| CCG023070.1 | 906  | 1465 | 2 | 69.481966  | 0.077170589 | -9.814371745 | Down | 0         | 0          | -                                                                                        |
| CCG005289.1 | 468  | 1616 | 2 | 148.374126 | 0.149394345 | -9.955898279 | Down | 0         | 0          | AAEL002181-PA OS=Aedes aegypti GN=AAEL002181 PE=4 SV=1                                   |
| CCG014525.1 | 624  | 1780 | 2 | 122.573922 | 0.112045759 | -10.09534832 | Down | 0         | 0          | AAEL010824-PA OS=Aedes aegypti GN=AAEL010824 PE=4 SV=1                                   |
| CCG005201.1 | 471  | 2354 | 2 | 214.757442 | 0.148442789 | -10.4985854  | Down | 0         | 0          | AAEL006429-PA OS=Aedes aegypti GN=AAEL006429 PE=3 SV=1                                   |
| CCG020273.1 | 381  | 2376 | 2 | 267.968739 | 0.183508015 | -10.51200592 | Down | 0         | 0          | Cuticle protein OS=Culex quinquefasciatus GN=CpipJ_CPIJ003476 PE=4 SV=1                  |
| CCG000986.1 | 564  | 5973 | 2 | 455.067775 | 0.12396552  | -11.8419268  | Down | 0         | 0          | Putative uncharacterized protein OS=Culex quinquefasciatus GN=CpipJ_CPIJ010091 PE=4 SV=1 |
| CCG005492.1 | 781  | 16   | 3 | 0.88030186 | 0.134282753 | -2.712724295 | Down | 0.0005293 | 0.00083028 | -                                                                                        |
| CCG002248.1 | 729  | 16   | 3 | 0.94309431 | 0.143861221 | -2.712724295 | Down | 0.0005293 | 0.00083033 | -                                                                                        |
| CCG015958.1 | 270  | 16   | 3 | 2.54635464 | 0.388425297 | -2.712724295 | Down | 0.0005293 | 0.00083038 | Putative uncharacterized protein OS=Culex quinquefasciatus GN=CpipJ_CPIJ009687 PE=4 SV=1 |
| CCG013837.1 | 1752 | 16   | 3 | 0.39241767 | 0.059860063 | -2.712724295 | Down | 0.0005293 | 0.00083049 | AAEL000751-PA OS=Aedes aegypti GN=AAEL000751 PE=4 SV=1                                   |
| CCG018818.1 | 615  | 16   | 3 | 1.11791179 | 0.170528179 | -2.712724295 | Down | 0.0005293 | 0.00083044 | AAEL013436-PA OS=Aedes aegypti GN=AAEL013436 PE=4 SV=1                                   |

|             |      |    |   |            |             |              |      |           |            |                                                                      |
|-------------|------|----|---|------------|-------------|--------------|------|-----------|------------|----------------------------------------------------------------------|
| CCG007990.1 | 690  | 17 | 3 | 1.05867462 | 0.151992508 | -2.800187137 | Down | 0.000275  | 0.00043863 | AGAP002453-PA OS=Anopheles gambiae GN=AgaP_AGAP002453 PE=4 SV=5      |
| CCG028072.1 | 785  | 18 | 3 | 0.98529328 | 0.13359851  | -2.882649297 | Down | 0.0001419 | 0.00022989 | AAEL014449-PA OS=Aedes aegypti GN=AAEL014449 PE=4 SV=1               |
| CCG015213.1 | 1071 | 19 | 3 | 0.76230155 | 0.097922344 | -2.960651809 | Down | 7.28E-05  | 0.00012059 | AAEL000268-PA OS=Aedes aegypti GN=AAEL000268 PE=3 SV=1               |
| CCG022076.1 | 1314 | 19 | 3 | 0.62132797 | 0.079813417 | -2.960651809 | Down | 7.28E-05  | 0.00012057 | AAEL001168-PA OS=Aedes aegypti GN=AAEL001168 PE=4 SV=1               |
| CCG012677.1 | 714  | 19 | 3 | 1.14345232 | 0.146883516 | -2.960651809 | Down | 7.28E-05  | 0.00012058 | -                                                                    |
| CCG016764.1 | 708  | 20 | 3 | 1.21383431 | 0.148128291 | -3.03465239  | Down | 3.71E-05  | 6.27E-05   | AAEL015566-PA OS=Aedes aegypti GN=CTLGA2_b PE=4 SV=1                 |
| CCG005296.1 | 553  | 21 | 3 | 1.63176207 | 0.189647071 | -3.105041718 | Down | 1.88E-05  | 3.24E-05   | -                                                                    |
| CCG002297.1 | 1941 | 21 | 3 | 0.46489667 | 0.05403134  | -3.105041718 | Down | 1.88E-05  | 3.24E-05   | AAEL002173-PA OS=Aedes aegypti GN=AAEL002173 PE=4 SV=1               |
| CCG019946.1 | 827  | 22 | 3 | 1.14308847 | 0.12681358  | -3.172155914 | Down | 9.50E-06  | 1.66E-05   | Putative transposase OS=Anopheles gambiae PE=4 SV=1                  |
| CCG005286.1 | 315  | 22 | 3 | 3.00106083 | 0.332935969 | -3.172155914 | Down | 9.50E-06  | 1.66E-05   | AAEL011332-PA OS=Aedes aegypti GN=AAEL011332 PE=4 SV=1               |
| CCG023443.1 | 1608 | 22 | 3 | 0.58789438 | 0.065220666 | -3.172155914 | Down | 9.50E-06  | 1.66E-05   | AAEL002666-PA OS=Aedes aegypti GN=AAEL002666 PE=4 SV=1               |
| CCG014607.1 | 2994 | 23 | 3 | 0.33009482 | 0.035028333 | -3.236286252 | Down | 4.78E-06  | 8.50E-06   | AAEL009019-PA OS=Aedes aegypti GN=AAEL009019 PE=4 SV=1               |
| CCG017407.1 | 1464 | 25 | 3 | 0.73377279 | 0.071635813 | -3.356580485 | Down | 1.19E-06  | 2.18E-06   | AAEL008715-PA OS=Aedes aegypti GN=AAEL008715 PE=4 SV=1               |
| CCG009474.1 | 1137 | 25 | 3 | 0.94480507 | 0.092238197 | -3.356580485 | Down | 1.19E-06  | 2.18E-06   | Uncharacterized protein OS=Anopheles darlingi GN=AND_09382 PE=4 SV=1 |
| CCG017624.1 | 1593 | 25 | 3 | 0.6743524  | 0.065834796 | -3.356580485 | Down | 1.19E-06  | 2.18E-06   | AAEL001312-PA OS=Aedes aegypti GN=CYP9M6 PE=3 SV=1                   |
| CCG022689.1 | 1398 | 26 | 3 | 0.799151   | 0.075017761 | -3.413164014 | Down | 5.92E-07  | 1.10E-06   | AAEL013156-PA OS=Aedes aegypti GN=AAEL013156 PE=4 SV=1               |

|             |      |    |   |            |             |              |      |          |          |                                                                                                   |
|-------------|------|----|---|------------|-------------|--------------|------|----------|----------|---------------------------------------------------------------------------------------------------|
| CCG017550.1 | 1539 | 26 | 3 | 0.72593444 | 0.068144789 | -3.413164014 | Down | 5.92E-07 | 1.10E-06 | MELZ16 OS=Culex quinquefasciatus<br>GN=CpipJ_CPIJ007168 PE=4<br>SV=1                              |
| CCG001215.1 | 1296 | 27 | 3 | 0.8952028  | 0.080921937 | -3.467611798 | Down | 2.93E-07 | 5.51E-07 | -                                                                                                 |
| CCG001221.1 | 504  | 28 | 3 | 2.38720748 | 0.208084981 | -3.520079218 | Down | 1.45E-07 | 2.75E-07 | AAEL004969-PA OS=Aedes aegypti GN=AAEL004969 PE=4<br>SV=1                                         |
| CCG020306.1 | 1392 | 28 | 3 | 0.86433374 | 0.075341114 | -3.520079218 | Down | 1.45E-07 | 2.75E-07 | AAEL002391-PA (Fragment)<br>OS=Aedes aegypti<br>GN=AAEL002391 PE=4 SV=1                           |
| CCG007459.1 | 309  | 29 | 3 | 4.03275826 | 0.339400745 | -3.570705291 | Down | 7.12E-08 | 1.37E-07 | -                                                                                                 |
| CCG009504.1 | 1152 | 30 | 3 | 1.11900351 | 0.091037179 | -3.619614891 | Down | 3.50E-08 | 6.83E-08 | Lipase OS=Aedes aegypti<br>GN=AAEL013365 PE=3 SV=1                                                |
| CCG015428.1 | 2400 | 30 | 3 | 0.53712168 | 0.043697846 | -3.619614891 | Down | 3.50E-08 | 6.83E-08 | AAEL007730-PA OS=Aedes aegypti GN=AAEL007730 PE=4<br>SV=1                                         |
| CCG011854.1 | 1008 | 31 | 3 | 1.32148985 | 0.10404249  | -3.666920606 | Down | 1.71E-08 | 3.38E-08 | -                                                                                                 |
| CCG028569.1 | 843  | 31 | 3 | 1.58014445 | 0.124406679 | -3.666920606 | Down | 1.71E-08 | 3.38E-08 | -                                                                                                 |
| CCG016193.1 | 840  | 34 | 3 | 1.73925116 | 0.124850988 | -3.800187137 | Down | 1.98E-09 | 4.04E-09 | AAEL011530-PA OS=Aedes aegypti GN=AAEL011530 PE=4<br>SV=1                                         |
| CCG009995.1 | 669  | 34 | 3 | 2.18381312 | 0.156763573 | -3.800187137 | Down | 1.98E-09 | 4.04E-09 | AAEL012952-PA OS=Aedes aegypti GN=AAEL012952 PE=1<br>SV=1                                         |
| CCG013221.1 | 1084 | 44 | 3 | 1.74415897 | 0.096747998 | -4.172155914 | Down | 1.32E-12 | 3.20E-12 | Copia OS=Drosophila simulans<br>GN=GIP PE=4 SV=1                                                  |
| CCG014977.1 | 810  | 45 | 3 | 2.38720748 | 0.129475099 | -4.204577392 | Down | 6.29E-13 | 1.60E-12 | AAEL009485-PA OS=Aedes aegypti GN=AAEL009485 PE=4<br>SV=1                                         |
| CCG018070.1 | 439  | 46 | 3 | 4.50252344 | 0.23889483  | -4.236286252 | Down | 3.00E-13 | 8.29E-13 | -                                                                                                 |
| CCG014031.1 | 2211 | 47 | 3 | 0.91342267 | 0.047433211 | -4.267313147 | Down | 1.43E-13 | 4.28E-13 | AAEL002676-PA OS=Aedes aegypti GN=AAEL002676 PE=4<br>SV=1                                         |
| CCG015690.1 | 1559 | 55 | 3 | 1.51593034 | 0.067270577 | -4.494084009 | Down | 3.63E-16 | 1.36E-15 | Putative uncharacterized protein<br>OS=Culex quinquefasciatus<br>GN=CpipJ_CPIJ007192 PE=4<br>SV=1 |
| CCG020179.1 | 957  | 70 | 3 | 3.14303179 | 0.109587075 | -4.842007312 | Down | 4.30E-21 | 1.70E-20 | AAEL007582-PA OS=Aedes aegypti GN=AAEL007582 PE=3<br>SV=1                                         |
| CCG025462.1 | 1059 | 76 | 3 | 3.0837581  | 0.099031946 | -4.960651809 | Down | 4.43E-23 | 1.77E-22 | AAEL007076-PA OS=Aedes aegypti GN=AAEL007076 PE=4<br>SV=1                                         |

|             |      |     |   |            |             |              |      |           |           |                                                                                          |
|-------------|------|-----|---|------------|-------------|--------------|------|-----------|-----------|------------------------------------------------------------------------------------------|
| CCG007094.1 | 1422 | 86  | 3 | 2.59873219 | 0.073751639 | -5.13898905  | Down | 2.08E-26  | 8.58E-26  | AAEL011374-PA OS=Aedes aegypti GN=AAEL011374 PE=4 SV=1                                   |
| CCG000987.1 | 1608 | 90  | 3 | 2.40502246 | 0.065220666 | -5.204577392 | Down | 9.62E-28  | 3.99E-27  | Putative uncharacterized protein OS=Culex quinquefasciatus GN=CpipJ_CPIJ013304 PE=4 SV=1 |
| CCG008093.1 | 582  | 114 | 3 | 8.41675214 | 0.180197303 | -5.54561431  | Down | 8.40E-36  | 3.66E-35  | Salivary antigen-5 related protein AG5-4 OS=Aedes albopictus PE=2 SV=1                   |
| CCG012197.1 | 907  | 117 | 3 | 5.54295364 | 0.115628258 | -5.583089015 | Down | 8.18E-37  | 3.58E-36  | AGAP013343-PA OS=Anopheles gambiae GN=AgaP_AGAP013343 PE=4 SV=1                          |
| CCG007229.1 | 1305 | 117 | 3 | 3.85245897 | 0.080363855 | -5.583089015 | Down | 8.18E-37  | 3.58E-36  | Putative uncharacterized protein OS=Culex quinquefasciatus GN=CpipJ_CPIJ018057 PE=4 SV=1 |
| CCG011296.1 | 516  | 143 | 3 | 11.9082792 | 0.203245795 | -5.872595632 | Down | 1.30E-45  | 5.96E-45  | AGAP006830-PA OS=Anopheles gambiae GN=CPR58 PE=4 SV=3                                    |
| CCG011984.1 | 1146 | 144 | 3 | 5.39933838 | 0.091513814 | -5.882649297 | Down | 5.97E-46  | 2.74E-45  | Proton channel protein OS=Culex quinquefasciatus GN=CpipJ_CPIJ001618 PE=4 SV=1           |
| CCG019212.1 | 1770 | 149 | 3 | 3.61722625 | 0.059251317 | -5.931892816 | Down | 1.20E-47  | 5.53E-47  | AAEL011774-PA OS=Aedes aegypti GN=AAEL011774 PE=4 SV=1                                   |
| CCG007391.1 | 621  | 175 | 3 | 12.1090234 | 0.168880564 | -6.163935407 | Down | 1.70E-56  | 8.13E-56  | -                                                                                        |
| CCG016297.1 | 3690 | 198 | 3 | 2.30569308 | 0.028421363 | -6.342080916 | Down | 2.41E-64  | 1.17E-63  | AAEL005967-PA OS=Aedes aegypti GN=AAEL005967 PE=4 SV=1                                   |
| CCG016893.1 | 639  | 208 | 3 | 13.9870185 | 0.164123365 | -6.413164014 | Down | 9.19E-68  | 4.53E-67  | AGAP003937-PD OS=Anopheles gambiae GN=AgaP_AGAP003937 PE=4 SV=1                          |
| CCG023682.1 | 1290 | 215 | 3 | 7.16162244 | 0.081298318 | -6.460917145 | Down | 3.70E-70  | 1.83E-69  | AAEL006399-PA OS=Aedes aegypti GN=AAEL006399 PE=4 SV=1                                   |
| CCG012992.1 | 747  | 283 | 3 | 16.2790293 | 0.140394686 | -6.857382538 | Down | 1.77E-93  | 9.24E-93  | Uncharacterized protein (Fragment) OS=Sarcophilus harrisii GN=PDIA4 PE=3 SV=1            |
| CCG015822.1 | 621  | 320 | 3 | 22.1422143 | 0.168880564 | -7.03465239  | Down | 3.34E-106 | 1.78E-105 | -                                                                                        |
| CCG009040.1 | 486  | 374 | 3 | 33.0672443 | 0.215791832 | -7.259618755 | Down | 8.42E-125 | 4.64E-124 | AAEL002908-PA OS=Aedes aegypti GN=AAEL002908 PE=4 SV=1                                   |



|             |      |       |   |            |             |              |      |           |            |                                                                                          |
|-------------|------|-------|---|------------|-------------|--------------|------|-----------|------------|------------------------------------------------------------------------------------------|
| CCG017754.1 | 576  | 530   | 3 | 39.5381239 | 0.182074358 | -7.762572845 | Down | 1.16E-178 | 6.80E-178  | AGAP013156-PA OS=Anopheles gambiae GN=AgaP_AGAP013156 PE=4 SV=1                          |
| CCG003582.1 | 2043 | 602   | 3 | 12.6616643 | 0.05133374  | -7.946343972 | Down | 1.46E-203 | 8.72E-203  | Putative uncharacterized protein OS=Culex quinquefasciatus GN=CpipJ_CPIJ018443 PE=4 SV=1 |
| CCG023793.1 | 1881 | 622   | 3 | 14.2090244 | 0.055754827 | -7.993495066 | Down | 1.75E-210 | 1.05E-209  | AAEL003999-PA (Fragment) OS=Aedes aegypti GN=AAEL003999 PE=4 SV=1                        |
| CCG012638.1 | 549  | 1972  | 3 | 154.346661 | 0.191028835 | -9.658168132 | Down | 0         | 0          | AAEL013511-PA OS=Aedes aegypti GN=AAEL013511 PE=4 SV=1                                   |
| CCG015981.1 | 1107 | 2518  | 3 | 97.7396493 | 0.094737877 | -10.01078686 | Down | 0         | 0          | AAEL003915-PA OS=Aedes aegypti GN=AAEL003915 PE=4 SV=1                                   |
| CCG020824.1 | 504  | 4349  | 3 | 370.784476 | 0.208084981 | -10.79919229 | Down | 0         | 0          | -                                                                                        |
| CCG010041.1 | 543  | 5423  | 3 | 429.143408 | 0.193139651 | -11.11759975 | Down | 0         | 0          | AAEL013511-PA OS=Aedes aegypti GN=AAEL013511 PE=4 SV=1                                   |
| CCG001372.1 | 609  | 5528  | 3 | 390.043831 | 0.17220826  | -11.1452662  | Down | 0         | 0          | AAEL004292-PA OS=Aedes aegypti GN=AAEL004292 PE=4 SV=1                                   |
| CCG017458.1 | 597  | 12542 | 3 | 902.724307 | 0.175669733 | -12.3272041  | Down | 0         | 0          | AAEL010180-PA OS=Aedes aegypti GN=AAEL010180 PE=4 SV=1                                   |
| CCG011223.1 | 430  | 18    | 4 | 1.79873308 | 0.325193272 | -2.467611798 | Down | 0.0004703 | 0.00074043 | -                                                                                        |
| CCG023256.1 | 775  | 18    | 4 | 0.99800674 | 0.180429816 | -2.467611798 | Down | 0.0004703 | 0.00074029 | -                                                                                        |
| CCG004106.1 | 1026 | 18    | 4 | 0.75385499 | 0.136289578 | -2.467611798 | Down | 0.0004703 | 0.00074038 | Lipase OS=Aedes aegypti GN=AAEL012350 PE=3 SV=1                                          |
| CCG015861.1 | 534  | 18    | 4 | 1.44841802 | 0.261859751 | -2.467611798 | Down | 0.0004703 | 0.00074034 | AGAP003060-PA OS=Anopheles gambiae GN=AGAP003060 PE=4 SV=4                               |
| CCG028568.1 | 1152 | 19    | 4 | 0.70870222 | 0.121382905 | -2.54561431  | Down | 0.0002511 | 0.00040181 | AAEL002355-PA OS=Aedes aegypti GN=AAEL002355 PE=3 SV=1                                   |
| CCG011894.1 | 1326 | 19    | 4 | 0.6157051  | 0.105454832 | -2.54561431  | Down | 0.0002511 | 0.00040178 | AAEL000347-PA OS=Aedes aegypti GN=AAEL000347 PE=4 SV=1                                   |
| CCG009119.1 | 1736 | 19    | 4 | 0.47029087 | 0.080549025 | -2.54561431  | Down | 0.0002511 | 0.00040183 | Putative uncharacterized protein OS=Tribolium castaneum GN=TcasGA2_TC010720 PE=4 SV=1    |

|             |      |    |   |            |             |              |      |           |            |                                                                                          |
|-------------|------|----|---|------------|-------------|--------------|------|-----------|------------|------------------------------------------------------------------------------------------|
| CCG016042.1 | 894  | 19 | 4 | 0.91322702 | 0.156412871 | -2.54561431  | Down | 0.0002511 | 0.00040176 | AAEL005780-PA OS=Aedes aegypti GN=AAEL005780 PE=4 SV=1                                   |
| CCG027667.1 | 605  | 20 | 4 | 1.42048709 | 0.231129103 | -2.619614891 | Down | 0.0001331 | 0.00021597 | Gag-Pol polyprotein OS=Schistosoma japonicum PE=4 SV=1                                   |
| CCG017447.1 | 1713 | 20 | 4 | 0.50168984 | 0.081630535 | -2.619614891 | Down | 0.0001331 | 0.000216   | AAEL013428-PA OS=Aedes aegypti GN=AAEL013428 PE=4 SV=1                                   |
| CCG016826.1 | 1884 | 20 | 4 | 0.4561543  | 0.074221394 | -2.619614891 | Down | 0.0001331 | 0.00021598 | AAEL008939-PA OS=Aedes aegypti GN=AAEL008939 PE=4 SV=1                                   |
| CCG027183.2 | 1291 | 21 | 4 | 0.69896547 | 0.108313793 | -2.690004219 | Down | 7.01E-05  | 0.00011624 | DNA topoisomerase 1b OS=Megavirus chiliensis GN=mg859 PE=4 SV=1                          |
| CCG027926.1 | 315  | 21 | 4 | 2.86464897 | 0.443914626 | -2.690004219 | Down | 7.01E-05  | 0.00011623 | -                                                                                        |
| CCG025615.1 | 453  | 22 | 4 | 2.08683038 | 0.308682356 | -2.757118415 | Down | 3.67E-05  | 6.20E-05   | Predicted protein OS=Culex quinquefasciatus GN=CpipJ_CPIJ010132 PE=4 SV=1                |
| CCG000174.1 | 372  | 22 | 4 | 2.54122086 | 0.375895449 | -2.757118415 | Down | 3.67E-05  | 6.20E-05   | AAEL002191-PA OS=Aedes aegypti GN=AAEL002191 PE=4 SV=1                                   |
| CCG022999.1 | 1014 | 22 | 4 | 0.93228221 | 0.137902472 | -2.757118415 | Down | 3.67E-05  | 6.20E-05   | AAEL002893-PA OS=Aedes aegypti GN=AAEL002893 PE=3 SV=1                                   |
| CCG015509.1 | 880  | 23 | 4 | 1.12307261 | 0.158901258 | -2.821248752 | Down | 1.91E-05  | 3.29E-05   | -                                                                                        |
| CCG010727.1 | 861  | 23 | 4 | 1.14785586 | 0.16240779  | -2.821248752 | Down | 1.91E-05  | 3.29E-05   | AAEL012643-PA OS=Aedes aegypti GN=AAEL012643 PE=4 SV=1                                   |
| CCG004851.1 | 540  | 25 | 4 | 1.98933957 | 0.258950198 | -2.941542986 | Down | 5.09E-06  | 9.05E-06   | AGAP013084-PA OS=Anopheles gambiae GN=AgaP_AGAP013084 PE=4 SV=1                          |
| CCG005600.1 | 1309 | 25 | 4 | 0.82065956 | 0.106824375 | -2.941542986 | Down | 5.09E-06  | 9.05E-06   | Pol-like protein OS=Aedes aegypti PE=4 SV=1                                              |
| CCG006478.1 | 924  | 26 | 4 | 1.20910509 | 0.151334531 | -2.998126514 | Down | 2.61E-06  | 4.70E-06   | Putative uncharacterized protein OS=Culex quinquefasciatus GN=CpipJ_CPIJ007764 PE=4 SV=1 |
| CCG019890.1 | 1020 | 27 | 4 | 1.13743415 | 0.137091281 | -3.052574298 | Down | 1.33E-06  | 2.44E-06   | AAEL007386-PA OS=Aedes aegypti GN=AAEL007386 PE=3 SV=1                                   |
| CCG006894.1 | 708  | 30 | 4 | 1.82075147 | 0.197504389 | -3.204577392 | Down | 1.73E-07  | 3.29E-07   | AAEL014235-PA OS=Aedes aegypti GN=AAEL014235 PE=4 SV=1                                   |

|             |      |    |   |            |             |              |      |          |          |                                                                                                   |
|-------------|------|----|---|------------|-------------|--------------|------|----------|----------|---------------------------------------------------------------------------------------------------|
| CCG019028.1 | 570  | 32 | 4 | 2.41233598 | 0.245321241 | -3.297686796 | Down | 4.37E-08 | 8.52E-08 | Putative uncharacterized protein<br>OS=Culex quinquefasciatus<br>GN=CpipJ_CPIJ009310 PE=4<br>SV=1 |
| CCG007576.1 | 2400 | 32 | 4 | 0.57292979 | 0.058263795 | -3.297686796 | Down | 4.37E-08 | 8.52E-08 | AAEL007730-PA OS=Aedes<br>aegypti GN=AAEL007730 PE=4<br>SV=1                                      |
| CCG003241.1 | 612  | 32 | 4 | 2.24678351 | 0.228485469 | -3.297686796 | Down | 4.37E-08 | 8.52E-08 | AAEL010851-PA OS=Aedes<br>aegypti GN=AAEL010851 PE=4<br>SV=1                                      |
| CCG016538.1 | 678  | 34 | 4 | 2.15482445 | 0.206243521 | -3.385149637 | Down | 1.09E-08 | 2.17E-08 | Lysozyme OS=Aedes albopictus<br>PE=2 SV=1                                                         |
| CCG017216.1 | 2598 | 35 | 4 | 0.57888403 | 0.053823367 | -3.426969813 | Down | 5.41E-09 | 1.09E-08 | PTTBT OS=Culex<br>quinquefasciatus<br>GN=CpipJ_CPIJ007600 PE=4<br>SV=1                            |
| CCG010697.1 | 1149 | 36 | 4 | 1.34631022 | 0.121699832 | -3.467611798 | Down | 2.69E-09 | 5.48E-09 | Uncharacterized protein<br>OS=Anopheles darlingi<br>GN=AND_01397 PE=4 SV=1                        |
| CCG013645.1 | 804  | 36 | 4 | 1.92401797 | 0.173921775 | -3.467611798 | Down | 2.69E-09 | 5.47E-09 | AAEL009965-PA OS=Aedes<br>aegypti GN=AAEL009965 PE=4<br>SV=1                                      |
| CCG000520.1 | 864  | 36 | 4 | 1.79040561 | 0.161843874 | -3.467611798 | Down | 2.69E-09 | 5.47E-09 | AAEL008638-PA OS=Aedes<br>aegypti GN=CYP49A1 PE=3 SV=1                                            |
| CCG028016.1 | 1773 | 37 | 4 | 0.89671753 | 0.078868081 | -3.507140162 | Down | 1.33E-09 | 2.73E-09 | AAEL013187-PA (Fragment)<br>OS=Aedes aegypti<br>GN=AAEL013187 PE=4 SV=1                           |
| CCG016438.1 | 1068 | 48 | 4 | 1.93122403 | 0.130929876 | -3.882649297 | Down | 5.05E-13 | 1.31E-12 | AAEL004360-PA OS=Aedes<br>aegypti GN=AAEL004360 PE=4<br>SV=1                                      |
| CCG012696.1 | 771  | 48 | 4 | 2.67515858 | 0.181365898 | -3.882649297 | Down | 5.05E-13 | 1.31E-12 | AAEL009559-PA OS=Aedes<br>aegypti GN=AAEL009559 PE=4<br>SV=1                                      |
| CCG027851.1 | 453  | 50 | 4 | 4.74279631 | 0.308682356 | -3.941542986 | Down | 1.18E-13 | 3.65E-13 | AAEL000481-PA OS=Aedes<br>aegypti GN=AAEL006481 PE=4<br>SV=1                                      |
| CCG013449.1 | 1116 | 52 | 4 | 2.00217401 | 0.125298483 | -3.998126514 | Down | 2.74E-14 | 9.56E-14 | Hypothetical conserved protein<br>OS=Aedes aegypti PE=2 SV=1                                      |
| CCG011893.1 | 780  | 53 | 4 | 2.91973838 | 0.179273214 | -4.025607251 | Down | 1.32E-14 | 4.70E-14 | AAEL000336-PA OS=Aedes<br>aegypti GN=AAEL000336 PE=4<br>SV=1                                      |
| CCG015219.1 | 924  | 58 | 4 | 2.69723442 | 0.151334531 | -4.155667791 | Down | 3.35E-16 | 1.26E-15 | AAEL000098-PA OS=Aedes<br>aegypti GN=AAEL000098 PE=4<br>SV=1                                      |

|             |      |     |   |            |             |              |      |          |          |                                                                                                   |
|-------------|------|-----|---|------------|-------------|--------------|------|----------|----------|---------------------------------------------------------------------------------------------------|
| CCG023314.1 | 1305 | 73  | 4 | 2.40367098 | 0.107151806 | -4.487511355 | Down | 4.76E-21 | 1.87E-20 | AAEL014228-PA (Fragment)<br>OS=Aedes aegypti<br>GN=AAEL014228 PE=3 SV=1                           |
| CCG020354.1 | 573  | 82  | 4 | 6.14924649 | 0.244036836 | -4.655238801 | Down | 5.44E-24 | 2.19E-23 | Uncharacterized protein<br>OS=Anopheles darlingi<br>GN=AND_08994 PE=4 SV=1                        |
| CCG025404.1 | 988  | 86  | 4 | 3.74028054 | 0.141531485 | -4.723951551 | Down | 2.64E-25 | 1.08E-24 | -                                                                                                 |
| CCG015540.1 | 651  | 91  | 4 | 6.00652204 | 0.2147974   | -4.805481436 | Down | 5.95E-27 | 2.46E-26 | AAEL010545-PA (Fragment)<br>OS=Aedes aegypti<br>GN=AAEL010545 PE=4 SV=1                           |
| CCG021843.1 | 410  | 97  | 4 | 10.1660104 | 0.341056359 | -4.897599638 | Down | 6.19E-29 | 2.59E-28 | AAEL000578-PA OS=Aedes<br>aegypti GN=AAEL000578 PE=4<br>SV=1                                      |
| CCG001422.1 | 855  | 99  | 4 | 4.97544295 | 0.163547494 | -4.927043416 | Down | 1.35E-29 | 5.66E-29 | AAEL008421-PA OS=Aedes<br>aegypti GN=AAEL008421 PE=4<br>SV=1                                      |
| CCG017063.1 | 573  | 105 | 4 | 7.87403514 | 0.244036836 | -5.011932314 | Down | 1.38E-31 | 5.85E-31 | Uncharacterized protein<br>OS=Anopheles darlingi<br>GN=AND_08994 PE=4 SV=1                        |
| CCG016445.1 | 1434 | 112 | 4 | 3.35607411 | 0.097512627 | -5.105041718 | Down | 6.44E-34 | 2.77E-33 | AAEL005004-PA OS=Aedes<br>aegypti GN=AAEL005004 PE=4<br>SV=1                                      |
| CCG027136.1 | 960  | 124 | 4 | 5.55025739 | 0.145659487 | -5.251883107 | Down | 6.34E-38 | 2.80E-37 | AAEL009697-PA OS=Aedes<br>aegypti GN=AAEL009697 PE=4<br>SV=1                                      |
| CCG008192.1 | 1299 | 127 | 4 | 4.20104411 | 0.107646734 | -5.286371483 | Down | 6.28E-39 | 2.79E-38 | AAEL004270-PA OS=Aedes<br>aegypti GN=AAEL004270 PE=4<br>SV=1                                      |
| CCG013835.1 | 1719 | 128 | 4 | 3.19960793 | 0.081345612 | -5.297686796 | Down | 2.90E-39 | 1.29E-38 | AAEL002405-PA OS=Aedes<br>aegypti GN=AAEL002405 PE=4<br>SV=1                                      |
| CCG018885.1 | 930  | 159 | 4 | 7.3464385  | 0.15035818  | -5.610569751 | Down | 1.09E-49 | 5.06E-49 | Putative uncharacterized protein<br>OS=Culex quinquefasciatus<br>GN=CpipJ_CPIJ002954 PE=4<br>SV=1 |
| CCG020181.1 | 504  | 176 | 4 | 15.0053041 | 0.277446641 | -5.757118415 | Down | 1.95E-55 | 9.26E-55 | AAEL011591-PA OS=Aedes<br>aegypti GN=AAEL011591 PE=4<br>SV=1                                      |
| CCG005809.1 | 1554 | 180 | 4 | 4.97718934 | 0.089982694 | -5.789539893 | Down | 8.61E-57 | 4.11E-56 | Putative uncharacterized protein<br>OS=Culex quinquefasciatus<br>GN=CpipJ_CPIJ013980 PE=4<br>SV=1 |

|             |      |      |   |            |             |              |      |           |            |                                                                                          |
|-------------|------|------|---|------------|-------------|--------------|------|-----------|------------|------------------------------------------------------------------------------------------|
| CCG021901.1 | 576  | 213  | 4 | 15.8898498 | 0.242765811 | -6.032396416 | Down | 5.40E-68  | 2.66E-67   | AGAP013156-PA OS=Anopheles gambiae GN=AgaP_AGAP013156 PE=4 SV=1                          |
| CCG002556.1 | 1254 | 244  | 4 | 8.3609372  | 0.111509655 | -6.228424134 | Down | 1.48E-78  | 7.51E-78   | AAEL007887-PA OS=Aedes aegypti GN=AAEL007887 PE=3 SV=1                                   |
| CCG009157.1 | 1218 | 262  | 4 | 9.2430792  | 0.114805507 | -6.331109798 | Down | 1.06E-84  | 5.45E-84   | Lipase OS=Aedes aegypti GN=AAEL012342 PE=3 SV=1                                          |
| CCG015682.1 | 933  | 303  | 4 | 13.9548013 | 0.149874713 | -6.54086078  | Down | 1.00E-98  | 5.30E-98   | AAEL000694-PA OS=Aedes aegypti GN=AAEL000694 PE=4 SV=1                                   |
| CCG011371.1 | 297  | 370  | 4 | 53.5313192 | 0.470818542 | -6.829068257 | Down | 1.04E-121 | 5.72E-121  | AAEL006011-PA OS=Aedes aegypti GN=AAEL006011 PE=4 SV=1                                   |
| CCG015691.1 | 1881 | 418  | 4 | 9.54882991 | 0.07433977  | -7.005045928 | Down | 3.29E-138 | 1.85E-137  | Uncharacterized protein OS=Anopheles darlingi GN=AND_13394 PE=4 SV=1                     |
| CCG024842.1 | 651  | 508  | 4 | 33.5309143 | 0.2147974   | -7.286371483 | Down | 3.31E-169 | 1.92E-168  | Uncharacterized protein OS=Anopheles darlingi GN=AND_08375 PE=4 SV=1                     |
| CCG015458.1 | 540  | 560  | 4 | 44.5612063 | 0.258950198 | -7.426969813 | Down | 3.84E-187 | 2.27E-186  | Putative uncharacterized protein OS=Culex quinquefasciatus GN=CpipJ_CPIJ001222 PE=4 SV=1 |
| CCG013055.1 | 486  | 657  | 4 | 58.0887153 | 0.287722443 | -7.657436357 | Down | 1.23E-220 | 7.43E-220  | AAEL002908-PA OS=Aedes aegypti GN=AAEL002908 PE=4 SV=1                                   |
| CCG025647.1 | 591  | 800  | 4 | 58.1654614 | 0.236604242 | -7.941542986 | Down | 4.42E-270 | 2.75E-269  | AAEL009707-PA OS=Aedes aegypti GN=AAEL009707 PE=4 SV=1                                   |
| CCG023324.1 | 1388 | 1151 | 4 | 35.6326834 | 0.100744313 | -8.466358914 | Down | 0         | 0          | AAEL005188-PA OS=Aedes aegypti GN=AAEL005188 PE=4 SV=1                                   |
| CCG009378.1 | 484  | 1837 | 4 | 163.089675 | 0.288911378 | -9.140822707 | Down | 0         | 0          | AAEL005219-PA OS=Aedes aegypti GN=AAEL005219 PE=4 SV=1                                   |
| CCG007385.1 | 222  | 2061 | 4 | 398.921725 | 0.629878861 | -9.306815586 | Down | 0         | 0          | AAEL006746-PA OS=Aedes aegypti GN=AAEL006746 PE=4 SV=1                                   |
| CCG001090.1 | 3984 | 4927 | 4 | 53.1405327 | 0.035098671 | -10.56418055 | Down | 0         | 0          | AAEL000637-PA OS=Aedes aegypti GN=AAEL000637 PE=4 SV=1                                   |
| CCG015425.1 | 1377 | 21   | 5 | 0.65531186 | 0.126936372 | -2.368076124 | Down | 0.0002171 | 0.00034822 | AAEL001689-PA OS=Aedes aegypti GN=AAEL001689 PE=3 SV=1                                   |

|             |      |    |   |            |             |              |      |           |            |                                                                                           |
|-------------|------|----|---|------------|-------------|--------------|------|-----------|------------|-------------------------------------------------------------------------------------------|
| CCG006507.1 | 884  | 21 | 5 | 1.02077424 | 0.19772781  | -2.368076124 | Down | 0.0002171 | 0.00034828 | Putative uncharacterized protein (Fragment) OS=Solenopsis invicta GN=SINV_11683 PE=4 SV=1 |
| CCG010239.1 | 895  | 21 | 5 | 1.00822841 | 0.195297636 | -2.368076124 | Down | 0.0002171 | 0.00034824 | -                                                                                         |
| CCG000127.1 | 2067 | 21 | 5 | 0.43655754 | 0.084562837 | -2.368076124 | Down | 0.0002171 | 0.00034826 | Putative uncharacterized protein OS=Culex quinquefasciatus GN=CpipJ_CPIJ002423 PE=4 SV=1  |
| CCG020542.1 | 198  | 22 | 5 | 4.77441496 | 0.882784767 | -2.43519032  | Down | 0.0001176 | 0.0001913  | AGAP006541-PA OS=Anopheles gambiae GN=AGAP006541 PE=4 SV=3                                |
| CCG026081.1 | 966  | 22 | 5 | 0.97860679 | 0.180943462 | -2.43519032  | Down | 0.0001176 | 0.00019131 | Putative uncharacterized protein OS=Culex quinquefasciatus GN=CpipJ_CPIJ016285 PE=4 SV=1  |
| CCG000494.1 | 1061 | 23 | 5 | 0.93148341 | 0.164742115 | -2.499320657 | Down | 6.33E-05  | 0.00010519 | Pol polyprotein (Fragment) OS=Anopheles gambiae PE=4 SV=1                                 |
| CCG017427.1 | 424  | 23 | 5 | 2.33090542 | 0.41224383  | -2.499320657 | Down | 6.33E-05  | 0.00010518 | -                                                                                         |
| CCG027205.1 | 1314 | 23 | 5 | 0.75213386 | 0.133022362 | -2.499320657 | Down | 6.33E-05  | 0.00010518 | AAEL000048-PA (Fragment) OS=Aedes aegypti GN=GPRgr4 PE=4 SV=2                             |
| CCG015659.1 | 591  | 27 | 5 | 1.96308432 | 0.295755303 | -2.730646203 | Down | 5.00E-06  | 8.89E-06   | AAEL003184-PB OS=Aedes aegypti GN=AAEL003184 PE=4 SV=1                                    |
| CCG026077.1 | 753  | 27 | 5 | 1.54074746 | 0.232126672 | -2.730646203 | Down | 5.00E-06  | 8.89E-06   | AGAP000801-PB (Fragment) OS=Anopheles gambiae GN=AgaP_AGAP000801 PE=4 SV=1                |
| CCG019456.1 | 1875 | 27 | 5 | 0.61876418 | 0.093222071 | -2.730646203 | Down | 5.00E-06  | 8.89E-06   | AAEL013428-PA OS=Aedes aegypti GN=AAEL013428 PE=4 SV=1                                    |
| CCG011905.1 | 624  | 27 | 5 | 1.85926736 | 0.280114397 | -2.730646203 | Down | 5.00E-06  | 8.89E-06   | -                                                                                         |
| CCG027282.1 | 876  | 33 | 5 | 1.61872288 | 0.199533543 | -3.020152821 | Down | 9.63E-08  | 1.85E-07   | AAEL007878-PA OS=Aedes aegypti GN=AAEL007878 PE=3 SV=1                                    |
| CCG013797.1 | 756  | 33 | 5 | 1.87566302 | 0.231205534 | -3.020152821 | Down | 9.63E-08  | 1.85E-07   | -                                                                                         |
| CCG005675.1 | 1087 | 34 | 5 | 1.34403954 | 0.160801641 | -3.063221543 | Down | 4.92E-08  | 9.57E-08   | -                                                                                         |
| CCG003204.1 | 1638 | 35 | 5 | 0.91815672 | 0.106710247 | -3.105041718 | Down | 2.51E-08  | 4.93E-08   | AAEL005060-PA OS=Aedes aegypti GN=CLIPB44 PE=3 SV=2                                       |

|             |      |     |   |            |             |              |      |          |          |                                                                                          |
|-------------|------|-----|---|------------|-------------|--------------|------|----------|----------|------------------------------------------------------------------------------------------|
| CCG004659.1 | 564  | 38  | 5 | 2.89512396 | 0.309913801 | -3.223686215 | Down | 3.25E-09 | 6.61E-09 | AAEL001552-PA OS=Aedes aegypti GN=AAEL001552 PE=4 SV=1                                   |
| CCG007486.3 | 1113 | 39  | 5 | 1.50567803 | 0.157045269 | -3.26116092  | Down | 1.64E-09 | 3.35E-09 | AAEL009774-PA OS=Aedes aegypti GN=AAEL009774 PE=3 SV=1                                   |
| CCG005553.1 | 234  | 40  | 5 | 7.34525378 | 0.746971726 | -3.297686796 | Down | 8.22E-10 | 1.70E-09 | AAEL0005257-PA OS=Aedes aegypti GN=AAEL003257 PE=4 SV=1                                  |
| CCG011864.1 | 984  | 41  | 5 | 1.79040561 | 0.17763352  | -3.333310706 | Down | 4.11E-10 | 8.58E-10 | AAEL011365-PA OS=Aedes aegypti GN=AAEL011365 PE=4 SV=1                                   |
| CCG022553.1 | 436  | 52  | 5 | 5.12483073 | 0.400897669 | -3.676198419 | Down | 1.78E-13 | 5.20E-13 | Putative uncharacterized protein OS=Culex quinquefasciatus GN=CpipJ_CPIJ018057 PE=4 SV=1 |
| CCG007060.1 | 3015 | 62  | 5 | 0.88362307 | 0.057973925 | -3.929955012 | Down | 1.32E-16 | 4.98E-16 | AAEL0006541-PA OS=Aedes aegypti GN=AAEL006541 PE=4 SV=1                                  |
| CCG019697.2 | 1170 | 63  | 5 | 2.31375494 | 0.149394345 | -3.953038625 | Down | 6.39E-17 | 2.41E-16 | AAEL0006826-PA OS=Aedes aegypti GN=AAEL006826 PE=3 SV=1                                  |
| CCG018754.1 | 2073 | 80  | 5 | 1.65826279 | 0.084318082 | -4.297686796 | Down | 2.36E-22 | 9.38E-22 | Flu-1esmn OS=Culex quinquefasciatus GN=CpipJ_CPIJ001605 PE=4 SV=1                        |
| CCG014853.1 | 1143 | 82  | 5 | 3.08269312 | 0.152923345 | -4.333310706 | Down | 5.33E-23 | 2.13E-22 | AAEL014193-PA OS=Aedes aegypti GN=AAEL014193 PE=4 SV=1                                   |
| CCG009581.1 | 528  | 93  | 5 | 7.5685328  | 0.331044288 | -4.514917512 | Down | 1.43E-26 | 5.90E-26 | AAEL013621-PA OS=Aedes aegypti GN=AAEL013621 PE=4 SV=1                                   |
| CCG006055.1 | 738  | 114 | 5 | 6.63760128 | 0.236844694 | -4.808648715 | Down | 1.85E-33 | 7.94E-33 | AAEL010397-PA OS=Aedes aegypti GN=AAEL010397 PE=4 SV=1                                   |
| CCG013201.1 | 1170 | 122 | 5 | 4.48060481 | 0.149394345 | -4.906496039 | Down | 4.20E-36 | 1.83E-35 | AAEL006154-PA (Fragment) OS=Aedes aegypti GN=AAEL006154 PE=4 SV=1                        |
| CCG018004.1 | 3975 | 122 | 5 | 1.31881953 | 0.043972675 | -4.906496039 | Down | 4.20E-36 | 1.83E-35 | AAEL015231-PA OS=Aedes aegypti GN=AAEL015231 PE=4 SV=1                                   |
| CCG014391.1 | 2352 | 144 | 5 | 2.63080008 | 0.074316065 | -5.145683703 | Down | 2.05E-43 | 9.28E-43 | AAEL0006541-PA OS=Aedes aegypti GN=AAEL006541 PE=4 SV=1                                  |
| CCG025432.1 | 1728 | 157 | 5 | 3.9040789  | 0.101152421 | -5.27037945  | Down | 9.28E-48 | 4.29E-47 | AAEL001347-PA OS=Aedes aegypti GN=AAEL001347 PE=4 SV=1                                   |

|             |       |      |   |            |             |              |      |           |            |                                                                                                |
|-------------|-------|------|---|------------|-------------|--------------|------|-----------|------------|------------------------------------------------------------------------------------------------|
| CCG022313.1 | 2727  | 176  | 5 | 2.77325753 | 0.064096584 | -5.43519032  | Down | 3.93E-54  | 1.86E-53   | AAEL001340-PA (Fragment)<br>OS=Aedes aegypti<br>GN=AAEL001340 PE=4 SV=1                        |
| CCG010418.1 | 1326  | 304  | 5 | 9.85128154 | 0.13181854  | -6.223686215 | Down | 1.56E-97  | 8.24E-97   | AAEL004939-PA OS=Aedes<br>aegypti GN=AAEL004939 PE=3<br>SV=1                                   |
| CCG008346.1 | 13800 | 1000 | 5 | 3.11374888 | 0.012666042 | -7.941542986 | Down | 0         | 0          | AAEL007225-PA OS=Aedes<br>aegypti GN=AAEL007225 PE=4<br>SV=1                                   |
| CCG024336.1 | 2091  | 1064 | 5 | 21.8650395 | 0.083592245 | -8.031041137 | Down | 0         | 0          | AAEL014174-PA OS=Aedes<br>aegypti GN=AAEL014174 PE=4<br>SV=1                                   |
| CCG009693.1 | 576   | 1384 | 5 | 103.246723 | 0.303457264 | -8.410386929 | Down | 0         | 0          | AAEL001677-PA OS=Aedes<br>aegypti GN=AAEL001677 PE=4<br>SV=1                                   |
| CCG003394.1 | 1155  | 2180 | 5 | 81.1030489 | 0.151334531 | -9.065871121 | Down | 0         | 0          | AAEL003915-PA OS=Aedes<br>aegypti GN=AAEL003915 PE=4<br>SV=1                                   |
| CCG007995.1 | 1623  | 6100 | 5 | 161.500543 | 0.107696478 | -10.55035223 | Down | 0         | 0          | Cytosol aminopeptidase<br>OS=Culex quinquefasciatus<br>GN=CpipJ_CPIJ000990 PE=4<br>SV=1        |
| CCG024515.1 | 1027  | 21   | 6 | 0.87864112 | 0.204235307 | -2.105041718 | Down | 0.0005818 | 0.00091085 | Putative uncharacterized protein<br>OS=Aedes aegypti PE=4 SV=1                                 |
| CCG008140.1 | 779   | 22   | 6 | 1.21352267 | 0.26925502  | -2.172155914 | Down | 0.0003259 | 0.00051726 | Uncharacterized protein<br>OS=Anopheles darlingi<br>GN=AND_11211 PE=4 SV=1                     |
| CCG022683.1 | 660   | 23   | 6 | 1.49743015 | 0.317802516 | -2.236286252 | Down | 0.0001811 | 0.0002917  | AAEL008654-PA OS=Aedes<br>aegypti GN=AAEL008654 PE=4<br>SV=1                                   |
| CCG012465.1 | 618   | 23   | 6 | 1.59919724 | 0.339400745 | -2.236286252 | Down | 0.0001811 | 0.00029172 | Ecdysis triggering hormone<br>OS=Aedes aegypti PE=2 SV=1                                       |
| CCG000151.1 | 1068  | 24   | 6 | 0.96561201 | 0.196394813 | -2.297686796 | Down | 9.99E-05  | 0.00016297 | AAEL007851-PA OS=Aedes<br>aegypti GN=AAEL007851 PE=4<br>SV=1                                   |
| CCG005775.1 | 1818  | 24   | 6 | 0.56725722 | 0.115373851 | -2.297686796 | Down | 9.99E-05  | 0.00016296 | Putative uncharacterized protein<br>OS=Tribolium castaneum<br>GN=TcasGA2_TC011569 PE=4<br>SV=1 |
| CCG013605.1 | 321   | 24   | 6 | 3.21269044 | 0.653425734 | -2.297686796 | Down | 9.99E-05  | 0.00016295 | AAEL012977-PA (Fragment)<br>OS=Aedes aegypti<br>GN=AAEL012977 PE=4 SV=1                        |
| CCG026627.1 | 436   | 25   | 6 | 2.46386093 | 0.481077203 | -2.356580485 | Down | 5.47E-05  | 9.13E-05   | -                                                                                              |



|             |      |    |   |            |             |              |      |          |          |                                                                                                   |
|-------------|------|----|---|------------|-------------|--------------|------|----------|----------|---------------------------------------------------------------------------------------------------|
| CCG021796.1 | 600  | 25 | 6 | 1.79040561 | 0.349582768 | -2.356580485 | Down | 5.47E-05 | 9.13E-05 | Putative uncharacterized protein<br>OS=Culex quinquefasciatus<br>GN=CpipJ_CPIJ011650 PE=4<br>SV=1 |
| CCG003705.1 | 896  | 26 | 6 | 1.24688962 | 0.234095603 | -2.413164014 | Down | 2.98E-05 | 5.06E-05 | -                                                                                                 |
| CCG008952.1 | 1404 | 26 | 6 | 0.79573583 | 0.149394345 | -2.413164014 | Down | 2.98E-05 | 5.06E-05 | AAEL010193-PA OS=Aedes<br>aegypti GN=AAEL010193 PE=4<br>SV=1                                      |
| CCG004928.1 | 747  | 26 | 6 | 1.49559987 | 0.280789372 | -2.413164014 | Down | 2.98E-05 | 5.06E-05 | AAEL013737-PA OS=Aedes<br>aegypti GN=AAEL013737 PE=4<br>SV=1                                      |
| CCG015038.1 | 481  | 27 | 6 | 2.41202252 | 0.436069981 | -2.467611798 | Down | 1.61E-05 | 2.78E-05 | AAEL010836-PA OS=Aedes<br>aegypti GN=AAEL010836 PE=4<br>SV=1                                      |
| CCG024862.1 | 543  | 30 | 6 | 2.37401849 | 0.386279301 | -2.619614891 | Down | 2.47E-06 | 4.46E-06 | AAEL000557-PA OS=Aedes<br>aegypti GN=AAEL000557 PE=4<br>SV=1                                      |
| CCG011169.1 | 1185 | 30 | 6 | 1.08784138 | 0.177003933 | -2.619614891 | Down | 2.47E-06 | 4.46E-06 | Putative uncharacterized protein<br>OS=Tribolium castaneum<br>GN=TcasGA2_TC004277 PE=4<br>SV=1    |
| CCG005125.1 | 3588 | 30 | 6 | 0.35927872 | 0.058458657 | -2.619614891 | Down | 2.47E-06 | 4.46E-06 | Carboxypeptidase AT OS=Culex<br>quinquefasciatus<br>GN=CpipJ_CPIJ007169 PE=3<br>SV=1              |
| CCG020602.1 | 465  | 31 | 6 | 2.86464897 | 0.451074539 | -2.666920606 | Down | 1.31E-06 | 2.40E-06 | AAEL002438-PA (Fragment)<br>OS=Aedes aegypti<br>GN=AAEL002438 PE=4 SV=1                           |
| CCG006172.1 | 537  | 31 | 6 | 2.48056196 | 0.390595271 | -2.666920606 | Down | 1.31E-06 | 2.40E-06 | AAEL011373-PA OS=Aedes<br>aegypti GN=AAEL011373 PE=4<br>SV=1                                      |
| CCG003569.1 | 588  | 32 | 6 | 2.33848896 | 0.35671711  | -2.712724295 | Down | 6.92E-07 | 1.28E-06 | AAEL001305-PA OS=Aedes<br>aegypti GN=AAEL001305 PE=4<br>SV=1                                      |
| CCG001953.1 | 960  | 32 | 6 | 1.43232449 | 0.21848923  | -2.712724295 | Down | 6.92E-07 | 1.28E-06 | -                                                                                                 |
| CCG020517.1 | 729  | 34 | 6 | 2.00407541 | 0.287722443 | -2.800187137 | Down | 1.90E-07 | 3.60E-07 | AAEL014538-PA OS=Aedes<br>aegypti GN=AAEL014538 PE=4<br>SV=1                                      |
| CCG005252.1 | 726  | 36 | 6 | 2.13073064 | 0.288911378 | -2.882649297 | Down | 5.15E-08 | 1.00E-07 | AAEL012748-PA OS=Aedes<br>aegypti GN=AAEL012748 PE=4<br>SV=1                                      |
| CCG013483.1 | 1029 | 37 | 6 | 1.54507306 | 0.203838349 | -2.922177661 | Down | 2.66E-08 | 5.24E-08 | AAEL009690-PA OS=Aedes<br>aegypti GN=AAEL009690 PE=4<br>SV=1                                      |

|             |      |     |   |            |             |              |      |          |          |                                                                                                   |
|-------------|------|-----|---|------------|-------------|--------------|------|----------|----------|---------------------------------------------------------------------------------------------------|
| CCG005045.1 | 747  | 38  | 6 | 2.18587673 | 0.280789372 | -2.960651809 | Down | 1.37E-08 | 2.73E-08 | Uncharacterized protein<br>OS=Anopheles darlingi<br>GN=AND_17075 PE=4 SV=1                        |
| CCG022710.1 | 1485 | 38  | 6 | 1.09956223 | 0.141245563 | -2.960651809 | Down | 1.37E-08 | 2.73E-08 | Putative uncharacterized protein<br>OS=Culex quinquefasciatus<br>GN=CpipJ_CPIJ008816 PE=4<br>SV=1 |
| CCG024771.1 | 603  | 43  | 6 | 3.06417676 | 0.34784355  | -3.13898905  | Down | 4.80E-10 | 1.00E-09 | -                                                                                                 |
| CCG006183.1 | 558  | 47  | 6 | 3.61931456 | 0.375895449 | -3.267313147 | Down | 3.13E-11 | 6.80E-11 | -                                                                                                 |
| CCG023284.1 | 621  | 48  | 6 | 3.32133214 | 0.337761128 | -3.297686796 | Down | 1.57E-11 | 3.47E-11 | AAEL006974-PA OS=Aedes<br>aegypti GN=AAEL006974 PE=3<br>SV=1                                      |
| CCG020526.1 | 726  | 52  | 6 | 3.07772204 | 0.288911378 | -3.413164014 | Down | 9.83E-13 | 2.43E-12 | AAEL006310-PA OS=Aedes<br>aegypti GN=AAEL006310 PE=4<br>SV=1                                      |
| CCG020296.1 | 363  | 54  | 6 | 6.39219193 | 0.577822757 | -3.467611798 | Down | 2.43E-13 | 6.84E-13 | AAEL017144-PA OS=Aedes<br>aegypti PE=4 SV=1                                                       |
| CCG027248.1 | 345  | 55  | 6 | 6.85024755 | 0.607970031 | -3.494084009 | Down | 1.20E-13 | 3.71E-13 | -                                                                                                 |
| CCG015057.1 | 729  | 57  | 6 | 3.35977349 | 0.287722443 | -3.54561431  | Down | 2.95E-14 | 1.02E-13 | AAEL013773-PA OS=Aedes<br>aegypti GN=AAEL013773 PE=4<br>SV=1                                      |
| CCG014035.1 | 2055 | 59  | 6 | 1.23368095 | 0.102067961 | -3.595367345 | Down | 7.17E-15 | 2.57E-14 | AAEL013187-PA (Fragment)<br>OS=Aedes aegypti<br>GN=AAEL013187 PE=4 SV=1                           |
| CCG010071.1 | 1125 | 70  | 6 | 2.67367238 | 0.186444143 | -3.842007312 | Down | 2.73E-18 | 1.05E-17 | AAEL006484-PA OS=Aedes<br>aegypti GN=GPROP3 PE=3 SV=1                                             |
| CCG018499.1 | 957  | 78  | 6 | 3.50223542 | 0.219174149 | -3.998126514 | Down | 8.21E-21 | 3.23E-20 | AAEL014757-PA OS=Aedes<br>aegypti GN=AAEL014757 PE=4<br>SV=1                                      |
| CCG013843.1 | 384  | 80  | 6 | 8.95202804 | 0.546223075 | -4.03465239  | Down | 1.90E-21 | 7.52E-21 | AAEL002022-PA OS=Aedes<br>aegypti GN=AAEL002022 PE=4<br>SV=1                                      |
| CCG017702.1 | 1938 | 90  | 6 | 1.99549851 | 0.108229959 | -4.204577392 | Down | 1.22E-24 | 4.95E-24 | AAEL006732-PA OS=Aedes<br>aegypti GN=AAEL006732 PE=4<br>SV=1                                      |
| CCG002127.1 | 588  | 94  | 6 | 6.86931132 | 0.35671711  | -4.267313147 | Down | 6.33E-26 | 2.59E-25 | -                                                                                                 |
| CCG025477.1 | 1071 | 118 | 6 | 4.73429382 | 0.195844688 | -4.595367345 | Down | 1.02E-33 | 4.39E-33 | AAEL002911-PA (Fragment)<br>OS=Aedes aegypti<br>GN=AAEL002911 PE=4 SV=1                           |
| CCG022856.1 | 1875 | 146 | 6 | 3.34591    | 0.111866486 | -4.902548854 | Down | 6.24E-43 | 2.82E-42 | heat shock protein 70 BZ<br>OS=Culex quinquefasciatus<br>GN=CpipJ_CPIJ014564 PE=3<br>SV=1         |

|             |      |     |   |            |             |              |      |           |           |                                                                                       |
|-------------|------|-----|---|------------|-------------|--------------|------|-----------|-----------|---------------------------------------------------------------------------------------|
| CCG014629.1 | 615  | 148 | 6 | 10.3406841 | 0.341056359 | -4.922177661 | Down | 1.36E-43  | 6.15E-43  | AAEL004261-PA OS=Aedes aegypti GN=AAEL004261 PE=4 SV=1                                |
| CCG002211.1 | 568  | 156 | 6 | 11.8015468 | 0.369277572 | -4.998126514 | Down | 3.02E-46  | 1.39E-45  | -                                                                                     |
| CCG021128.2 | 381  | 157 | 6 | 17.7066885 | 0.550524044 | -5.007345044 | Down | 1.41E-46  | 6.47E-46  | AAEL001963-PA OS=Aedes aegypti GN=AAEL001963 PE=4 SV=1                                |
| CCG009629.1 | 1545 | 158 | 6 | 4.3943159  | 0.135760298 | -5.016505044 | Down | 6.55E-47  | 3.01E-46  | AAEL004564-PA (Fragment) OS=Aedes aegypti GN=AAEL004564 PE=4 SV=1                     |
| CCG023935.1 | 2064 | 160 | 6 | 3.33098718 | 0.101622898 | -5.03465239  | Down | 1.42E-47  | 6.54E-47  | AAEL010044-PA OS=Aedes aegypti GN=AAEL010044 PE=4 SV=1                                |
| CCG009570.1 | 429  | 165 | 6 | 16.526821  | 0.488926948 | -5.07904651  | Down | 3.08E-49  | 1.43E-48  | -                                                                                     |
| CCG020744.1 | 768  | 170 | 6 | 9.5115298  | 0.273111537 | -5.122115232 | Down | 6.65E-51  | 3.11E-50  | AAEL014840-PA OS=Aedes aegypti GN=AAEL014840 PE=3 SV=1                                |
| CCG001053.1 | 1077 | 170 | 6 | 6.78259506 | 0.194753631 | -5.122115232 | Down | 6.65E-51  | 3.11E-50  | AAEL009514-PA OS=Aedes aegypti GN=AAEL009514 PE=4 SV=1                                |
| CCG028421.1 | 1272 | 174 | 6 | 5.87793539 | 0.164897532 | -5.155667791 | Down | 3.08E-52  | 1.45E-51  | AAEL001437-PA OS=Aedes aegypti GN=AAEL001437 PE=4 SV=1                                |
| CCG015289.1 | 1227 | 206 | 6 | 7.21415267 | 0.170945119 | -5.399224823 | Down | 5.98E-63  | 2.91E-62  | AAEL012424-PA OS=Aedes aegypti GN=AAEL012424 PE=3 SV=1                                |
| CCG009243.1 | 1041 | 220 | 6 | 9.0810198  | 0.201488627 | -5.494084009 | Down | 1.17E-67  | 5.78E-67  | AAEL012424-PA OS=Aedes aegypti GN=AAEL012424 PE=3 SV=1                                |
| CCG010809.1 | 1395 | 234 | 6 | 7.20782645 | 0.15035818  | -5.583089015 | Down | 2.25E-72  | 1.12E-71  | AAEL009236-PA OS=Aedes aegypti GN=AAEL009236 PE=3 SV=1                                |
| CCG009382.1 | 330  | 247 | 6 | 32.1621953 | 0.635605032 | -5.661091527 | Down | 9.22E-77  | 4.65E-76  | AAEL011558-PA OS=Aedes aegypti GN=AAEL011558 PE=3 SV=1                                |
| CCG000684.1 | 489  | 297 | 6 | 26.0981824 | 0.428935911 | -5.927043416 | Down | 1.07E-93  | 5.59E-93  | Putative uncharacterized protein OS=Tribolium castaneum GN=TcasGA2_TC005836 PE=4 SV=1 |
| CCG006979.1 | 618  | 405 | 6 | 28.1597775 | 0.339400745 | -6.374502393 | Down | 1.68E-130 | 9.33E-130 | -                                                                                     |
| CCG027117.1 | 2142 | 414 | 6 | 8.30507476 | 0.097922344 | -6.406211253 | Down | 1.41E-133 | 7.85E-133 | AAEL010682-PA OS=Aedes aegypti GN=AAEL010682 PE=4 SV=1                                |
| CCG016902.1 | 5142 | 517 | 6 | 4.32037199 | 0.040791455 | -6.726744766 | Down | 7.27E-169 | 4.22E-168 | AAEL005109-PA OS=Aedes aegypti GN=AAEL005109 PE=4 SV=1                                |

|             |      |      |   |            |             |              |      |           |            |                                                                   |
|-------------|------|------|---|------------|-------------|--------------|------|-----------|------------|-------------------------------------------------------------------|
| CCG018255.1 | 1890 | 756  | 6 | 17.1878938 | 0.110978656 | -7.27496672  | Down | 4.34E-251 | 2.67E-250  | AAEL009204-PA OS=Aedes aegypti GN=AAEL009204 PE=3 SV=1            |
| CCG014812.1 | 222  | 887  | 6 | 171.685381 | 0.944818291 | -7.50551459  | Down | 2.78E-296 | 1.75E-295  | AAEL006746-PA OS=Aedes aegypti GN=AAEL006746 PE=4 SV=1            |
| CCG005200.1 | 759  | 2170 | 6 | 122.851547 | 0.276350014 | -8.796203623 | Down | 0         | 0          | AAEL006403-PA OS=Aedes aegypti GN=AAEL006403 PE=3 SV=1            |
| CCG020271.1 | 387  | 2738 | 6 | 304.008097 | 0.541988787 | -9.131631027 | Down | 0         | 0          | AAEL002181-PA OS=Aedes aegypti GN=AAEL002181 PE=4 SV=1            |
| CCG002696.1 | 909  | 3027 | 6 | 143.090634 | 0.230747701 | -9.276397255 | Down | 0         | 0          | AAEL006179-PA (Fragment) OS=Aedes aegypti GN=AAEL006179 PE=3 SV=1 |
| CCG020535.1 | 927  | 4796 | 6 | 222.311594 | 0.226267164 | -9.940340239 | Down | 0         | 0          | AAEL003027-PA OS=Aedes aegypti GN=AAEL003027 PE=4 SV=1            |
| CCG011577.1 | 1017 | 24   | 7 | 1.01403504 | 0.240617441 | -2.075294375 | Down | 0.0002612 | 0.00041756 | AAEL013337-PA OS=Aedes aegypti GN=AAEL013337 PE=4 SV=1            |
| CCG022894.1 | 1041 | 24   | 7 | 0.99065671 | 0.235070065 | -2.075294375 | Down | 0.0002612 | 0.00041753 | AAEL009072-PA OS=Aedes aegypti GN=AAEL009072 PE=4 SV=1            |
| CCG010355.1 | 1545 | 24   | 7 | 0.66749102 | 0.158387015 | -2.075294375 | Down | 0.0002612 | 0.00041759 | AAEL014020-PA OS=Aedes aegypti GN=AAEL014020 PE=4 SV=1            |
| CCG007276.1 | 846  | 25   | 7 | 1.26979121 | 0.289252881 | -2.134188064 | Down | 0.0001473 | 0.00023834 | AAEL008668-PA OS=Aedes aegypti GN=CLIPB22 PE=3 SV=1               |
| CCG011644.1 | 336  | 27   | 7 | 3.4529251  | 0.728297433 | -2.245219376 | Down | 4.59E-05  | 7.72E-05   | AAEL000266-PA (Fragment) OS=Aedes aegypti GN=GPRNNA21 PE=4 SV=1   |
| CCG015597.1 | 396  | 27   | 7 | 2.92975463 | 0.617949337 | -2.245219376 | Down | 4.59E-05  | 7.72E-05   | -                                                                 |
| CCG007346.1 | 909  | 28   | 7 | 1.32360019 | 0.269205652 | -2.297686796 | Down | 2.54E-05  | 4.35E-05   | AAEL005624-PA OS=Aedes aegypti GN=AAEL005624 PE=4 SV=1            |
| CCG027964.1 | 3357 | 28   | 7 | 0.35840112 | 0.072894828 | -2.297686796 | Down | 2.54E-05  | 4.35E-05   | AAEL007276-PA OS=Aedes aegypti GN=AAEL007276 PE=4 SV=1            |
| CCG017478.1 | 663  | 29   | 7 | 1.87952082 | 0.369091912 | -2.348312869 | Down | 1.39E-05  | 2.42E-05   | Superoxide dismutase [Cu-Zn] OS=Aedes aegypti GN=CUSOD1 PE=3 SV=2 |
| CCG017112.1 | 1602 | 33   | 7 | 0.88514435 | 0.152751521 | -2.534725993 | Down | 1.20E-06  | 2.21E-06   | AAEL000508-PA OS=Aedes aegypti GN=AAEL000508 PE=4 SV=1            |

|             |      |    |   |            |             |              |      |          |          |                                                                                                                     |
|-------------|------|----|---|------------|-------------|--------------|------|----------|----------|---------------------------------------------------------------------------------------------------------------------|
| CCG019465.1 | 1242 | 34 | 7 | 1.17630513 | 0.197027325 | -2.577794715 | Down | 6.45E-07 | 1.20E-06 | AAEL008558-PA (Fragment)<br>OS=Aedes aegypti<br>GN=AAEL008558 PE=4 SV=1                                             |
| CCG028257.1 | 873  | 36 | 7 | 1.77194782 | 0.280306916 | -2.660256876 | Down | 1.83E-07 | 3.47E-07 | Putative uncharacterized protein<br>OS=Culex quinquefasciatus<br>GN=CpipJ_CPIJ013073 PE=4<br>SV=1                   |
| CCG018394.1 | 435  | 36 | 7 | 3.55611597 | 0.562546983 | -2.660256876 | Down | 1.83E-07 | 3.47E-07 | Serine/threonine-protein<br>phosphatase OS=Anopheles<br>darlingi GN=AND_16101 PE=3<br>SV=1                          |
| CCG020162.1 | 1199 | 37 | 7 | 1.32600515 | 0.204093359 | -2.69978524  | Down | 9.67E-08 | 1.86E-07 | Retrovirus-related Pol polyprotein<br>from transposon TNT 1-94<br>OS=Trichinella spiralis<br>GN=Tsp_01017 PE=4 SV=1 |
| CCG009470.1 | 1789 | 42 | 7 | 1.00879198 | 0.136784761 | -2.882649297 | Down | 3.80E-09 | 7.68E-09 | AAEL008340-PA OS=Aedes<br>aegypti GN=AAEL008346 PE=4<br>SV=1                                                        |
| CCG019171.1 | 1191 | 45 | 7 | 1.62354161 | 0.205464263 | -2.98218497  | Down | 5.24E-10 | 1.09E-09 | AAEL003719-PA OS=Aedes<br>aegypti GN=AAEL003719 PE=4<br>SV=1                                                        |
| CCG015306.1 | 657  | 47 | 7 | 3.0739384  | 0.372462614 | -3.044920726 | Down | 1.38E-10 | 2.94E-10 | AAEL011897-PA OS=Aedes<br>aegypti GN=AAEL011897 PE=4<br>SV=1                                                        |
| CCG011507.1 | 5337 | 51 | 7 | 0.41061579 | 0.045851216 | -3.162757216 | Down | 9.32E-12 | 2.08E-11 | AAEL007856-PA OS=Aedes<br>aegypti GN=AAEL007856 PE=4<br>SV=1                                                        |
| CCG013558.1 | 372  | 53 | 7 | 6.12203208 | 0.657817036 | -3.218252329 | Down | 2.39E-12 | 5.64E-12 | AAEL002191-PA OS=Aedes<br>aegypti GN=AAEL002191 PE=4<br>SV=1                                                        |
| CCG015775.1 | 348  | 57 | 7 | 7.03814619 | 0.703183728 | -3.323221888 | Down | 1.53E-13 | 4.55E-13 | -                                                                                                                   |
| CCG015776.1 | 838  | 58 | 7 | 2.97403891 | 0.292014245 | -3.348312869 | Down | 7.67E-14 | 2.47E-13 | -                                                                                                                   |
| CCG006902.1 | 918  | 64 | 7 | 2.99571135 | 0.266566381 | -3.490331874 | Down | 1.17E-15 | 4.26E-15 | AAEL004270-PA OS=Aedes<br>aegypti GN=AAEL004270 PE=4<br>SV=1                                                        |
| CCG007787.1 | 456  | 66 | 7 | 6.21930369 | 0.536640214 | -3.534725993 | Down | 2.87E-16 | 1.08E-15 | AAEL011730-PA OS=Aedes<br>aegypti GN=AAEL011730 PE=4<br>SV=1                                                        |
| CCG005406.1 | 2263 | 72 | 7 | 1.36713252 | 0.108134307 | -3.660256876 | Down | 4.10E-18 | 1.57E-17 | AAEL014339-PA OS=Aedes<br>aegypti GN=AAEL014339 PE=4<br>SV=1                                                        |
| CCG017995.1 | 780  | 73 | 7 | 4.02152644 | 0.313728125 | -3.680156433 | Down | 2.01E-18 | 7.72E-18 | AAEL003030-PA OS=Aedes<br>aegypti GN=AAEL003030 PE=4<br>SV=1                                                        |

|             |      |       |   |            |             |              |      |           |            |                                                                                                   |
|-------------|------|-------|---|------------|-------------|--------------|------|-----------|------------|---------------------------------------------------------------------------------------------------|
| CCG009819.1 | 1428 | 80    | 7 | 2.40726805 | 0.171364102 | -3.812259969 | Down | 1.33E-20  | 5.24E-20   | Uncharacterized protein<br>OS=Anopheles darlingi<br>GN=AND_13756 PE=4 SV=1                        |
| CCG015897.1 | 1389 | 92    | 7 | 2.84608753 | 0.176175621 | -4.01389383  | Down | 2.21E-24  | 8.95E-24   | AAEL006700-PA OS=Aedes<br>aegypti GN=AAEL006700 PE=3<br>SV=1                                      |
| CCG002751.1 | 792  | 153   | 7 | 8.30097146 | 0.308974668 | -4.747719717 | Down | 3.81E-44  | 1.73E-43   | AAEL002096-PA OS=Aedes<br>aegypti GN=AAEL002096 PE=4<br>SV=1                                      |
| CCG000271.1 | 1893 | 160   | 7 | 3.63188459 | 0.129269909 | -4.812259969 | Down | 1.89E-46  | 8.66E-46   | Putative uncharacterized protein<br>OS=Culex quinquefasciatus<br>GN=CpipJ_CPIJ008823 PE=4<br>SV=1 |
| CCG027989.1 | 795  | 246   | 7 | 13.2962952 | 0.307808726 | -5.432846379 | Down | 4.03E-75  | 2.02E-74   | AAEL006421-PA OS=Aedes<br>aegypti GN=AAEL006421 PE=3<br>SV=1                                      |
| CCG013532.1 | 3114 | 278   | 7 | 3.83609063 | 0.078583153 | -5.609272947 | Down | 6.73E-86  | 3.46E-85   | Uncharacterized protein<br>OS=Anopheles darlingi<br>GN=AND_00371 PE=4 SV=1                        |
| CCG009811.1 | 1182 | 533   | 7 | 19.3763693 | 0.207028712 | -6.548323597 | Down | 1.00E-172 | 5.82E-172  | AAEL007126-PA OS=Aedes<br>aegypti GN=AAEL007126 PE=4<br>SV=1                                      |
| CCG009055.1 | 1686 | 793   | 7 | 20.2105573 | 0.145141125 | -7.12150893  | Down | 4.79E-262 | 2.96E-261  | AAEL009910-PA OS=Aedes<br>aegypti GN=AAEL009910 PE=4<br>SV=1                                      |
| CCG022356.1 | 696  | 1836  | 7 | 113.351196 | 0.351591864 | -8.332682218 | Down | 0         | 0          | AAEL003501-PA OS=Aedes<br>aegypti GN=AAEL003501 PE=4<br>SV=1                                      |
| CCG023071.1 | 933  | 8725  | 7 | 401.833799 | 0.262280747 | -10.58127129 | Down | 0         | 0          | -                                                                                                 |
| CCG012823.1 | 1131 | 31923 | 7 | 1212.84071 | 0.216364224 | -12.45264049 | Down | 0         | 0          | AAEL009451-PA OS=Aedes<br>aegypti GN=AAEL009451 PE=3<br>SV=1                                      |
| CCG006452.1 | 816  | 24    | 8 | 1.26381572 | 0.342728204 | -1.882649297 | Down | 0.0006169 | 0.00095923 | Uncharacterized protein<br>OS=Anopheles darlingi<br>GN=AND_06563 PE=3 SV=1                        |
| CCG016083.1 | 369  | 24    | 8 | 2.79477949 | 0.757903019 | -1.882649297 | Down | 0.0006169 | 0.00095917 | -                                                                                                 |
| CCG028646.1 | 357  | 25    | 8 | 3.00908506 | 0.783378751 | -1.941542986 | Down | 0.000358  | 0.00056684 | -                                                                                                 |
| CCG001065.1 | 1596 | 25    | 8 | 0.67308482 | 0.175229458 | -1.941542986 | Down | 0.000358  | 0.00056681 | AAEL003772-PA OS=Aedes<br>aegypti GN=AAEL003772 PE=4<br>SV=1                                      |
| CCG008948.1 | 981  | 25    | 8 | 1.0950493  | 0.285082787 | -1.941542986 | Down | 0.000358  | 0.00056688 | AAEL014579-PA OS=Aedes<br>aegypti GN=AAEL014579 PE=3<br>SV=1                                      |
| CCG026291.1 | 524  | 26    | 8 | 2.13208607 | 0.533714149 | -1.998126514 | Down | 0.0002061 | 0.0003311  | -                                                                                                 |

|             |      |    |   |            |             |              |      |           |            |                                                                              |
|-------------|------|----|---|------------|-------------|--------------|------|-----------|------------|------------------------------------------------------------------------------|
| CCG025872.1 | 195  | 26 | 8 | 5.72929795 | 1.434185714 | -1.998126514 | Down | 0.0002061 | 0.00033112 | AAEL015672-PA OS=Aedes aegypti GN=AAEL015672 PE=4 SV=1                       |
| CCG006197.1 | 391  | 28 | 8 | 3.07711655 | 0.71525886  | -2.105041718 | Down | 6.68E-05  | 0.00011095 | -                                                                            |
| CCG014459.1 | 288  | 30 | 8 | 4.47601402 | 0.971063244 | -2.204577392 | Down | 2.11E-05  | 3.63E-05   | AAEL001708-PA OS=Aedes aegypti GN=AAEL001708 PE=4 SV=1                       |
| CCG019221.1 | 624  | 33 | 8 | 2.27243789 | 0.448183036 | -2.342080916 | Down | 3.58E-06  | 6.42E-06   | Rifesiin heavy chain OS=Culex quinquefasciatus GN=CpipJ_CPIJ015547 PE=3 SV=1 |
| CCG019734.1 | 558  | 35 | 8 | 2.69523425 | 0.501193932 | -2.426969813 | Down | 1.07E-06  | 1.97E-06   | AAEL010660-PA OS=Aedes aegypti GN=AAEL010660 PE=3 SV=1                       |
| CCG015488.1 | 558  | 35 | 8 | 2.69523425 | 0.501193932 | -2.426969813 | Down | 1.07E-06  | 1.97E-06   | AAEL005777-PA OS=Aedes aegypti GN=AAEL005777 PE=4 SV=1                       |
| CCG005700.1 | 1752 | 36 | 8 | 0.88293975 | 0.159626835 | -2.467611798 | Down | 5.81E-07  | 1.08E-06   | AAEL000751-PA OS=Aedes aegypti GN=AAEL000751 PE=4 SV=1                       |
| CCG028245.1 | 414  | 37 | 8 | 3.84029029 | 0.675522256 | -2.507140162 | Down | 3.14E-07  | 5.89E-07   | AAEL013513-PA OS=Aedes aegypti GN=AAEL013513 PE=4 SV=1                       |
| CCG026699.1 | 1248 | 37 | 8 | 1.27394245 | 0.224091518 | -2.507140162 | Down | 3.14E-07  | 5.89E-07   | AAEL008193-PA OS=Aedes aegypti GN=AAEL008193 PE=4 SV=1                       |
| CCG019925.1 | 855  | 40 | 8 | 2.01027998 | 0.327094987 | -2.619614891 | Down | 4.83E-08  | 9.40E-08   | AAEL010894-PA OS=Aedes aegypti GN=AAEL010894 PE=4 SV=1                       |
| CCG015537.1 | 2399 | 42 | 8 | 0.75228381 | 0.116576163 | -2.690004219 | Down | 1.36E-08  | 2.71E-08   | AAEL011203-PA OS=Aedes aegypti GN=AAEL011203 PE=4 SV=1                       |
| CCG024216.1 | 963  | 43 | 8 | 1.91869012 | 0.290411437 | -2.723951551 | Down | 7.20E-09  | 1.44E-08   | -                                                                            |
| CCG015837.1 | 765  | 43 | 8 | 2.41529227 | 0.365576751 | -2.723951551 | Down | 7.20E-09  | 1.44E-08   | AAEL012315-PA (Fragment) OS=Aedes aegypti GN=AAEL012315 PE=4 SV=1            |
| CCG003489.1 | 756  | 46 | 8 | 2.61456057 | 0.369928855 | -2.821248752 | Down | 1.04E-09  | 2.15E-09   | -                                                                            |
| CCG001353.1 | 450  | 47 | 8 | 4.48795006 | 0.621480476 | -2.852275648 | Down | 5.43E-10  | 1.13E-09   | AAEL015566-PA OS=Aedes aegypti GN=AAEL015566 PE=4 SV=1                       |
| CCG012354.1 | 899  | 49 | 8 | 2.34206562 | 0.311085889 | -2.91239664  | Down | 1.47E-10  | 3.12E-10   | -                                                                            |
| CCG001163.1 | 5166 | 53 | 8 | 0.44084319 | 0.05413593  | -3.025607251 | Down | 1.04E-11  | 2.31E-11   | AAEL002227-PA OS=Aedes aegypti GN=AAEL002227 PE=3 SV=1                       |
| CCG007152.1 | 1059 | 56 | 8 | 2.27224281 | 0.264085188 | -3.105041718 | Down | 1.39E-12  | 3.36E-12   | Protein Wnt (Fragment) OS=Aedes aegypti GN=AAEL014566 PE=3 SV=1              |

|             |      |     |   |            |             |              |      |           |           |                                                                                                                  |
|-------------|------|-----|---|------------|-------------|--------------|------|-----------|-----------|------------------------------------------------------------------------------------------------------------------|
| CCG007085.1 | 948  | 61  | 8 | 2.76493018 | 0.295006555 | -3.228424134 | Down | 4.67E-14  | 1.58E-13  | AAEL014190-PA OS=Aedes aegypti GN=AAEL014190 PE=4 SV=1                                                           |
| CCG017100.1 | 1176 | 62  | 8 | 2.26541118 | 0.237811407 | -3.251883107 | Down | 2.36E-14  | 8.23E-14  | AAEL006980-PA OS=Aedes aegypti GN=AAEL006980 PE=3 SV=1                                                           |
| CCG012817.1 | 681  | 64  | 8 | 4.03827168 | 0.410669918 | -3.297686796 | Down | 5.97E-15  | 2.15E-14  | AAEL005540-PA OS=Aedes aegypti GN=AAEL005540 PE=4 SV=1                                                           |
| CCG023590.1 | 948  | 73  | 8 | 3.30885087 | 0.295006555 | -3.487511355 | Down | 1.15E-17  | 4.39E-17  | AAEL014190-PA OS=Aedes aegypti GN=AAEL014190 PE=4 SV=1                                                           |
| CCG018257.1 | 1893 | 80  | 8 | 1.8159423  | 0.147737039 | -3.619614891 | Down | 8.27E-20  | 3.22E-19  | AAEL009193-PA OS=Aedes aegypti GN=AAEL009193 PE=3 SV=1                                                           |
| CCG002184.1 | 981  | 82  | 8 | 3.59176171 | 0.285082787 | -3.655238801 | Down | 2.00E-20  | 7.83E-20  | AAEL007674-PA OS=Aedes aegypti GN=AAEL007674 PE=4 SV=1                                                           |
| CCG012077.1 | 1311 | 93  | 8 | 3.04819628 | 0.213322818 | -3.836845607 | Down | 7.57E-24  | 3.05E-23  | AAEL005146-PA OS=Aedes aegypti GN=AAEL005148 PE=4 SV=1                                                           |
| CCG011873.1 | 318  | 114 | 8 | 15.4042445 | 0.879453504 | -4.13057681  | Down | 1.71E-30  | 7.24E-30  | -                                                                                                                |
| CCG024590.1 | 630  | 128 | 8 | 8.73035878 | 0.443914626 | -4.297686796 | Down | 5.52E-35  | 2.39E-34  | AAEL000359-PA OS=Aedes aegypti GN=AAEL000359 PE=4 SV=1                                                           |
| CCG023498.1 | 1959 | 133 | 8 | 2.91729183 | 0.142759681 | -4.352969232 | Down | 1.34E-36  | 5.88E-36  | EV-riano domain-containing protein 1 OS=Culex quinquefasciatus GN=CpipJ_CPIJ015374 PE=4 SV=1                     |
| CCG017792.1 | 912  | 171 | 8 | 8.05682524 | 0.306651551 | -4.715539311 | Down | 5.46E-49  | 2.53E-48  | AAEL005989-PA OS=Aedes aegypti GN=AAEL005989 PE=4 SV=1                                                           |
| CCG017947.1 | 1098 | 196 | 8 | 7.67037157 | 0.254705113 | -4.91239664  | Down | 3.10E-57  | 1.48E-56  | Beta-1,5-N-acetylglucosaminyl transferase radical fringe OS=Culex quinquefasciatus GN=CpipJ_CPIJ010821 PE=4 SV=1 |
| CCG026543.1 | 1002 | 250 | 8 | 10.7209917 | 0.279107998 | -5.263471081 | Down | 3.26E-75  | 1.64E-74  | AAEL002716-PA OS=Aedes aegypti GN=AAEL002716 PE=4 SV=1                                                           |
| CCG021979.1 | 1119 | 362 | 8 | 13.9008435 | 0.249925124 | -5.797532683 | Down | 6.04E-113 | 3.26E-112 | AAEL011591-PA OS=Aedes aegypti GN=AAEL011591 PE=4 SV=1                                                           |
| CCG004605.1 | 729  | 372 | 8 | 21.9269428 | 0.383629923 | -5.836845607 | Down | 2.47E-116 | 1.34E-115 | AAEL008697-PA OS=Aedes aegypti GN=AAEL008697 PE=4 SV=1                                                           |
| CCG014841.1 | 1314 | 382 | 8 | 12.4919624 | 0.212835779 | -5.875115624 | Down | 1.00E-119 | 5.50E-119 | AGAP005519-PA OS=Anopheles gambiae GN=AGAP005519 PE=4 SV=3                                                       |



|             |      |      |   |            |             |              |      |           |            |                                                                                                                     |
|-------------|------|------|---|------------|-------------|--------------|------|-----------|------------|---------------------------------------------------------------------------------------------------------------------|
| CCG020506.1 | 1908 | 514  | 8 | 11.5757042 | 0.146575584 | -6.303311345 | Down | 1.16E-164 | 6.69E-164  | Putative uncharacterized protein<br>OS=Culex quinquefasciatus<br>GN=CpipJ_CPIJ018057 PE=4<br>SV=1                   |
| CCG004325.1 | 1278 | 673  | 8 | 22.6280371 | 0.218831154 | -6.692149491 | Down | 4.32E-219 | 2.61E-218  | Putative uncharacterized protein<br>OS=Culex quinquefasciatus<br>GN=CpipJ_CPIJ000931 PE=4<br>SV=1                   |
| CCG017334.1 | 690  | 727  | 8 | 45.2739088 | 0.405313354 | -6.80349835  | Down | 1.26E-237 | 7.72E-237  | 40S ribosomal protein S13<br>OS=Aedes aegypti GN=40sRpS13<br>PE=2 SV=1                                              |
| CCG025653.1 | 231  | 1283 | 8 | 238.658742 | 1.210676252 | -7.622992251 | Down | 0         | 0          | AAEL006011-FA OS=Aedes<br>aegypti GN=AAEL006011 PE=4<br>SV=1                                                        |
| CCG016568.1 | 519  | 1800 | 8 | 149.027981 | 0.538855904 | -8.111467987 | Down | 0         | 0          | AAEL010101-FA OS=Aedes<br>aegypti GN=AAEL010161 PE=4<br>SV=1                                                        |
| CCG017457.1 | 936  | 2958 | 8 | 135.795379 | 0.29878869  | -8.828093133 | Down | 0         | 0          | AAEL010104-FA OS=Aedes<br>aegypti GN=AAEL010164 PE=4<br>SV=1                                                        |
| CCG026411.1 | 1878 | 5499 | 8 | 125.820325 | 0.148917047 | -9.722640367 | Down | 0         | 0          | F-box/inr protein OS=Culex<br>quinquefasciatus<br>GN=CpipJ_CPIJ011368 PE=4<br>SV=1                                  |
| CCG014543.1 | 1005 | 26   | 9 | 1.11165483 | 0.313059195 | -1.828201513 | Down | 0.0004711 | 0.00074144 | AAEL015307-FA OS=Aedes<br>aegypti GN=AAEL015307 PE=4<br>SV=1                                                        |
| CCG004217.1 | 2094 | 26   | 9 | 0.53353061 | 0.150250473 | -1.828201513 | Down | 0.0004711 | 0.00074148 | AAEL007588-FA OS=Aedes<br>aegypti GN=AAEL007588 PE=4<br>SV=1                                                        |
| CCG019642.1 | 1431 | 27   | 9 | 0.81074971 | 0.219863376 | -1.882649297 | Down | 0.0002763 | 0.00044048 | Retrovirus-related Pol polyprotein<br>from transposon TNT 1-94<br>OS=Trichinella spiralis<br>GN=Tsp_01017 PE=4 SV=1 |
| CCG001088.1 | 386  | 27   | 9 | 3.00565501 | 0.815089355 | -1.882649297 | Down | 0.0002763 | 0.00044051 | -                                                                                                                   |
| CCG011797.1 | 1056 | 28   | 9 | 1.13934902 | 0.297939859 | -1.935116717 | Down | 0.0001608 | 0.00025947 | -                                                                                                                   |
| CCG012526.1 | 608  | 28   | 9 | 1.97886936 | 0.517474492 | -1.935116717 | Down | 0.0001608 | 0.00025948 | -                                                                                                                   |
| CCG018451.1 | 545  | 29   | 9 | 2.28646294 | 0.577292644 | -1.98574279  | Down | 9.29E-05  | 0.00015302 | -                                                                                                                   |
| CCG026510.1 | 858  | 29   | 9 | 1.452357   | 0.366695211 | -1.98574279  | Down | 9.29E-05  | 0.00015303 | AAEL010894-FA OS=Aedes<br>aegypti GN=AAEL010894 PE=4<br>SV=1                                                        |
| CCG001820.1 | 657  | 31   | 9 | 2.02749128 | 0.478880504 | -2.081958105 | Down | 3.04E-05  | 5.16E-05   | -                                                                                                                   |
| CCG025487.1 | 1008 | 32   | 9 | 1.36411856 | 0.312127471 | -2.127761795 | Down | 1.72E-05  | 2.97E-05   | AAEL000806-FA OS=Aedes<br>aegypti GN=AAEL000806 PE=4<br>SV=1                                                        |

|             |      |    |   |            |             |              |      |          |          |                                                                                          |
|-------------|------|----|---|------------|-------------|--------------|------|----------|----------|------------------------------------------------------------------------------------------|
| CCG013184.1 | 783  | 33 | 9 | 1.81098498 | 0.401819273 | -2.172155914 | Down | 9.70E-06 | 1.70E-05 | AAEL003642-PA OS=Reedes aegypti GN=AAEL003642 PE=3 SV=1                                  |
| CCG005977.1 | 942  | 33 | 9 | 1.50530917 | 0.333996275 | -2.172155914 | Down | 9.70E-06 | 1.70E-05 | AAEL001318-PA OS=Reedes aegypti GN=AAEL001318 PE=4 SV=1                                  |
| CCG018828.1 | 840  | 34 | 9 | 1.73925116 | 0.374552965 | -2.215224636 | Down | 5.43E-06 | 9.65E-06 | AAEL011530-PA OS=Reedes aegypti GN=AAEL011530 PE=4 SV=1                                  |
| CCG001394.1 | 1437 | 35 | 9 | 1.04658365 | 0.218945366 | -2.257044812 | Down | 3.03E-06 | 5.44E-06 | AAEL008715-PA OS=Reedes aegypti GN=AAEL008715 PE=4 SV=1                                  |
| CCG006388.1 | 522  | 35 | 9 | 2.88111247 | 0.60272891  | -2.257044812 | Down | 3.03E-06 | 5.44E-06 | AAEL005264-PA OS=Reedes aegypti GN=AAEL005264 PE=4 SV=1                                  |
| CCG006481.1 | 291  | 36 | 9 | 5.31584346 | 1.081183818 | -2.297686796 | Down | 1.68E-06 | 3.06E-06 | Vesicular monoamine transporter OS=Culex quinquefasciatus GN=CpipJ_CPIJ007766 PE=4 SV=1  |
| CCG000029.1 | 522  | 36 | 9 | 2.96342997 | 0.60272891  | -2.297686796 | Down | 1.68E-06 | 3.06E-06 | AAEL010040-PA OS=Reedes aegypti GN=AAEL010040 PE=4 SV=1                                  |
| CCG002642.1 | 1496 | 36 | 9 | 1.03403105 | 0.210310489 | -2.297686796 | Down | 1.68E-06 | 3.06E-06 | AAEL014435-PA OS=Reedes aegypti GN=AAEL014435 PE=4 SV=1                                  |
| CCG009590.1 | 597  | 37 | 9 | 2.66311588 | 0.527009198 | -2.33721516  | Down | 9.26E-07 | 1.71E-06 | -                                                                                        |
| CCG013796.1 | 1139 | 38 | 9 | 1.43358202 | 0.276228701 | -2.375689308 | Down | 5.09E-07 | 9.49E-07 | Putative uncharacterized protein OS=Culex quinquefasciatus GN=CpipJ_CPIJ010109 PE=4 SV=1 |
| CCG025372.1 | 603  | 40 | 9 | 2.85039699 | 0.521765325 | -2.44968989  | Down | 1.51E-07 | 2.88E-07 | AAEL012052-PA OS=Reedes aegypti GN=AAEL012052 PE=4 SV=1                                  |
| CCG016348.1 | 864  | 43 | 9 | 2.13854003 | 0.364148716 | -2.554026549 | Down | 2.39E-08 | 4.69E-08 | AAEL008471-PA OS=Reedes aegypti GN=AAEL008471 PE=4 SV=1                                  |
| CCG001958.1 | 505  | 50 | 9 | 4.25442917 | 0.623018794 | -2.771617985 | Down | 2.84E-10 | 5.97E-10 | -                                                                                        |
| CCG006432.1 | 534  | 51 | 9 | 4.10385106 | 0.58918444  | -2.800187137 | Down | 1.49E-10 | 3.17E-10 | AAEL009333-PA OS=Reedes aegypti GN=AAEL009333 PE=4 SV=1                                  |
| CCG025242.1 | 486  | 55 | 9 | 4.86283005 | 0.647375496 | -2.909121508 | Down | 1.10E-11 | 2.44E-11 | AAEL009744-PA OS=Reedes aegypti GN=AAEL009744 PE=4 SV=1                                  |
| CCG009089.1 | 396  | 59 | 9 | 6.40205642 | 0.79450629  | -3.010404844 | Down | 7.83E-13 | 1.96E-12 | AAEL010061-PA OS=Reedes aegypti GN=AAEL010061 PE=4 SV=1                                  |
| CCG019645.1 | 656  | 63 | 9 | 4.12666659 | 0.479610504 | -3.105041718 | Down | 5.39E-14 | 1.80E-13 | Uncharacterized protein OS=Clonorchis sinensis GN=CLF_106999 PE=4 SV=1                   |

|             |      |     |   |            |             |              |      |          |          |                                                                                          |
|-------------|------|-----|---|------------|-------------|--------------|------|----------|----------|------------------------------------------------------------------------------------------|
| CCG024708.1 | 1614 | 72  | 9 | 1.91686548 | 0.194934629 | -3.297686796 | Down | 1.18E-16 | 4.44E-16 | AAEL002670-PA OS=Aedes aegypti GN=AAEL002670 PE=4 SV=1                                   |
| CCG002587.1 | 3975 | 83  | 9 | 0.89722968 | 0.079150815 | -3.502801226 | Down | 5.65E-20 | 2.20E-19 | AAEL003262-PA OS=Aedes aegypti GN=AAEL003262 PE=4 SV=1                                   |
| CCG009617.1 | 1116 | 89  | 9 | 3.42679783 | 0.281921587 | -3.603495226 | Down | 8.24E-22 | 3.26E-21 | AAEL009631-PA OS=Aedes aegypti GN=AAEL009631 PE=3 SV=1                                   |
| CCG028595.1 | 486  | 91  | 9 | 8.04577335 | 0.647375496 | -3.635556435 | Down | 2.00E-22 | 7.95E-22 | AAEL008450-PA OS=Aedes aegypti GN=AAEL008450 PE=4 SV=1                                   |
| CCG010275.1 | 987  | 97  | 9 | 4.22296277 | 0.318768481 | -3.727674637 | Down | 2.78E-24 | 1.12E-23 | AAEL011633-PA OS=Aedes aegypti GN=AAEL011633 PE=4 SV=1                                   |
| CCG016054.1 | 1111 | 98  | 9 | 3.79030962 | 0.283190361 | -3.742471639 | Down | 1.36E-24 | 5.50E-24 | Yokozuna protein OS=Bombyx mori GN=Yokozuna PE=4 SV=1                                    |
| CCG003860.1 | 619  | 119 | 9 | 8.26074058 | 0.508278661 | -4.022579558 | Down | 3.43E-31 | 1.46E-30 | -                                                                                        |
| CCG020463.1 | 1020 | 127 | 9 | 5.35015323 | 0.308455383 | -4.116446482 | Down | 9.80E-34 | 4.21E-33 | AAEL011459-PA OS=Aedes aegypti GN=AAEL011459 PE=4 SV=1                                   |
| CCG028621.1 | 708  | 139 | 9 | 8.43614846 | 0.444384874 | -4.246702867 | Down | 1.41E-37 | 6.21E-37 | AAEL014235-PA OS=Aedes aegypti GN=AAEL014235 PE=4 SV=1                                   |
| CCG012104.1 | 1164 | 140 | 9 | 5.16818114 | 0.270295954 | -4.257044812 | Down | 6.72E-38 | 2.97E-37 | Serine protease inhibitor OS=Culex quinquefasciatus GN=CpipJ_CPIJ006815 PE=3 SV=1        |
| CCG009158.1 | 1209 | 142 | 9 | 5.04690018 | 0.260235311 | -4.277508914 | Down | 1.53E-38 | 6.78E-38 | Lipase OS=Aedes aegypti GN=AAEL012349 PE=3 SV=1                                          |
| CCG001894.1 | 1230 | 145 | 9 | 5.06553782 | 0.255792269 | -4.307670885 | Down | 1.65E-39 | 7.35E-39 | AAEL010369-PA OS=Aedes aegypti GN=AAEL010369 PE=4 SV=1                                   |
| CCG009533.1 | 462  | 149 | 9 | 13.8582045 | 0.681005392 | -4.346930315 | Down | 8.45E-41 | 3.78E-40 | -                                                                                        |
| CCG006633.1 | 867  | 150 | 9 | 7.43421014 | 0.362888686 | -4.356580485 | Down | 4.02E-41 | 1.80E-40 | AgCP7521-like protein (Fragment) OS=Aedes albopictus PE=4 SV=1                           |
| CCG006994.1 | 517  | 157 | 9 | 13.0488362 | 0.60855801  | -4.422382544 | Down | 2.17E-43 | 9.84E-43 | AAEL007416-PA OS=Aedes aegypti GN=AAEL007416 PE=4 SV=1                                   |
| CCG027454.1 | 705  | 177 | 9 | 10.7881461 | 0.446275874 | -4.595367345 | Down | 6.68E-50 | 3.11E-49 | AAEL003216-PA OS=Aedes aegypti GN=AAEL003216 PE=4 SV=1                                   |
| CCG025426.1 | 837  | 178 | 9 | 9.13812755 | 0.375895449 | -4.603495226 | Down | 3.15E-50 | 1.47E-49 | Putative uncharacterized protein OS=Culex quinquefasciatus GN=CpipJ_CPIJ007357 PE=4 SV=1 |

|             |      |      |    |            |             |              |      |           |            |                                                                                          |
|-------------|------|------|----|------------|-------------|--------------|------|-----------|------------|------------------------------------------------------------------------------------------|
| CCG011146.1 | 1488 | 187  | 9  | 5.40009434 | 0.21144119  | -4.674656255 | Down | 3.55E-53  | 1.68E-52   | AAEL011310-PA OS=Aedes aegypti GN=AAEL011310 PE=4 SV=1                                   |
| CCG021307.1 | 573  | 243  | 9  | 18.222767  | 0.549082881 | -5.052574298 | Down | 1.11E-71  | 5.53E-71   | AAEL001290-PA OS=Aedes aegypti GN=AAEL001290 PE=4 SV=1                                   |
| CCG013754.1 | 807  | 249  | 9  | 13.2583196 | 0.389869258 | -5.087763727 | Down | 1.12E-73  | 5.62E-73   | AAEL011200-PA OS=Aedes aegypti GN=AAEL011206 PE=4 SV=1                                   |
| CCG025465.1 | 422  | 464  | 9  | 47.2463433 | 0.745555666 | -5.98574279  | Down | 3.83E-146 | 2.17E-145  | AAEL007410-PA OS=Aedes aegypti GN=AAEL007416 PE=4 SV=1                                   |
| CCG016952.1 | 918  | 652  | 9  | 30.5188093 | 0.342728204 | -6.476489949 | Down | 2.79E-210 | 1.67E-209  | AAEL007434-PA OS=Aedes aegypti GN=AAEL007434 PE=4 SV=1                                   |
| CCG024532.1 | 993  | 1025 | 9  | 44.3544592 | 0.316842388 | -7.129169989 | Down | 0         | 0          | AAEL012770-PA OS=Aedes aegypti GN=CYP325N1 PE=3 SV=2                                     |
| CCG016528.1 | 2649 | 1235 | 9  | 20.0330775 | 0.118771042 | -7.398057121 | Down | 0         | 0          | AAEL008496-PA OS=Aedes aegypti GN=AAEL008498 PE=4 SV=1                                   |
| CCG017456.1 | 477  | 1631 | 9  | 146.925864 | 0.659590128 | -7.799302861 | Down | 0         | 0          | AAEL010180-PA OS=Aedes aegypti GN=AAEL010186 PE=4 SV=1                                   |
| CCG027516.1 | 456  | 4308 | 9  | 405.950914 | 0.689965989 | -9.200564329 | Down | 0         | 0          | -                                                                                        |
| CCG014501.1 | 384  | 27   | 10 | 3.02130946 | 0.910371791 | -1.730646203 | Down | 0.0005996 | 0.00093314 | AAEL006355-PA OS=Aedes aegypti GN=SCRC1 PE=4 SV=2                                        |
| CCG002905.1 | 1056 | 28   | 10 | 1.13934902 | 0.331044288 | -1.783113623 | Down | 0.0003576 | 0.0005665  | AAEL009966-PA OS=Aedes aegypti GN=AAEL009966 PE=4 SV=1                                   |
| CCG012198.1 | 1359 | 28   | 10 | 0.88532198 | 0.257235296 | -1.783113623 | Down | 0.0003576 | 0.00056654 | Putative uncharacterized protein OS=Culex quinquefasciatus GN=CpipJ_CPIJ008569 PE=4 SV=1 |
| CCG021640.1 | 1662 | 28   | 10 | 0.72391851 | 0.210338609 | -1.783113623 | Down | 0.0003576 | 0.00056647 | AGAP007672-PA OS=Anopheles gambiae GN=AgaP_AGAP007672 PE=3 SV=5                          |
| CCG016745.1 | 1026 | 28   | 10 | 1.17266332 | 0.340723945 | -1.783113623 | Down | 0.0003576 | 0.0005664  | Putative uncharacterized protein OS=Culex quinquefasciatus GN=CpipJ_CPIJ009588 PE=4 SV=1 |
| CCG005844.1 | 1202 | 28   | 10 | 1.00095888 | 0.290834249 | -1.783113623 | Down | 0.0003576 | 0.00056643 | Uncharacterized protein OS=Anopheles darlingi GN=AND_05226 PE=4 SV=1                     |

|             |      |    |    |            |             |              |      |           |            |                                                                                                   |
|-------------|------|----|----|------------|-------------|--------------|------|-----------|------------|---------------------------------------------------------------------------------------------------|
| CCG021260.1 | 1852 | 28 | 10 | 0.64965042 | 0.188759594 | -1.783113623 | Down | 0.0003576 | 0.00056636 | Putative uncharacterized protein<br>OS=Tribolium castaneum<br>GN=TcasGA2_TC006955 PE=4<br>SV=1    |
| CCG002182.1 | 1497 | 29 | 10 | 0.83241303 | 0.233522223 | -1.833739696 | Down | 0.0002117 | 0.00033973 | AAEL007675-PA (Fragment)<br>OS=Aedes aegypti<br>GN=AAEL007675 PE=3 SV=1                           |
| CCG004073.1 | 750  | 29 | 10 | 1.6614964  | 0.466110357 | -1.833739696 | Down | 0.0002117 | 0.00033975 | AAEL002919-PA OS=Aedes<br>aegypti GN=AAEL002919 PE=4<br>SV=1                                      |
| CCG004742.1 | 210  | 36 | 10 | 7.36624022 | 1.664679846 | -2.145683703 | Down | 4.46E-06  | 7.95E-06   | AAEL000711-PA OS=Aedes<br>aegypti GN=AAEL000711 PE=4<br>SV=1                                      |
| CCG009578.1 | 409  | 36 | 10 | 3.78217713 | 0.854725593 | -2.145683703 | Down | 4.46E-06  | 7.95E-06   | -                                                                                                 |
| CCG016597.1 | 747  | 37 | 10 | 2.12835366 | 0.467982286 | -2.185212067 | Down | 2.51E-06  | 4.53E-06   | Uncharacterized protein<br>OS=Anopheles darlingi<br>GN=AND_17075 PE=4 SV=1                        |
| CCG019712.1 | 534  | 38 | 10 | 3.05777138 | 0.654649378 | -2.223686215 | Down | 1.41E-06  | 2.57E-06   | AAEL014505-PA OS=Aedes<br>aegypti GN=AAEL014505 PE=2<br>SV=1                                      |
| CCG002242.1 | 333  | 40 | 10 | 5.16152968 | 1.049798101 | -2.297686796 | Down | 4.36E-07  | 8.14E-07   | -                                                                                                 |
| CCG004031.1 | 229  | 46 | 10 | 8.63147507 | 1.526562304 | -2.499320657 | Down | 1.17E-08  | 2.32E-08   | -                                                                                                 |
| CCG025544.1 | 360  | 50 | 10 | 5.9680187  | 0.971063244 | -2.619614891 | Down | 9.72E-10  | 2.01E-09   | Voltage-dependent para-like<br>sodium channel (Fragment)<br>OS=Aedes albopictus PE=2 SV=1         |
| CCG020241.1 | 1088 | 53 | 10 | 2.09319479 | 0.321307691 | -2.703679156 | Down | 1.46E-10  | 3.11E-10   | AAEL007063-PA OS=Aedes<br>aegypti GN=AAEL007063 PE=3<br>SV=1                                      |
| CCG003675.1 | 1659 | 63 | 10 | 1.63176207 | 0.210718968 | -2.953038625 | Down | 2.23E-13  | 6.38E-13   | AAEL013194-PA OS=Aedes<br>aegypti GN=AAEL013194 PE=4<br>SV=1                                      |
| CCG027003.1 | 822  | 69 | 10 | 3.60694853 | 0.425283172 | -3.084283158 | Down | 4.11E-15  | 1.49E-14   | Putative uncharacterized protein<br>OS=Culex quinquefasciatus<br>GN=CpipJ_CPIJ003408 PE=4<br>SV=1 |
| CCG013311.1 | 807  | 84 | 10 | 4.47268613 | 0.433188064 | -3.368076124 | Down | 1.48E-19  | 5.75E-19   | AAEL013621-PA OS=Aedes<br>aegypti GN=AAEL013621 PE=4<br>SV=1                                      |
| CCG009727.1 | 1926 | 89 | 10 | 1.98562117 | 0.181507148 | -3.451492132 | Down | 4.58E-21  | 1.81E-20   | Putative uncharacterized protein<br>OS=Culex quinquefasciatus<br>GN=CpipJ_CPIJ013977 PE=4<br>SV=1 |

|             |      |       |    |            |             |              |      |           |            |                                                                                                |
|-------------|------|-------|----|------------|-------------|--------------|------|-----------|------------|------------------------------------------------------------------------------------------------|
| CCG014067.1 | 2043 | 92    | 10 | 1.93500518 | 0.171112466 | -3.499320657 | Down | 5.62E-22  | 2.23E-21   | Pro-resilin OS=Culex quinquefasciatus<br>GN=CpipJ_CPIJ001605 PE=4<br>SV=1                      |
| CCG024763.1 | 657  | 104   | 10 | 6.80190624 | 0.532089449 | -3.676198419 | Down | 1.17E-25  | 4.77E-25   | Putative uncharacterized protein<br>OS=Tribolium castaneum<br>GN=TcasGA2_TC010720 PE=4<br>SV=1 |
| CCG019833.1 | 1110 | 105   | 10 | 4.06470463 | 0.31493943  | -3.690004219 | Down | 5.73E-26  | 2.35E-25   | AAEL014938-PA OS=Aedes aegypti<br>GN=AAEL014938 PE=3<br>SV=1                                   |
| CCG020293.1 | 363  | 123   | 10 | 14.5599927 | 0.963037928 | -3.918273207 | Down | 1.37E-31  | 5.83E-31   | AAEL017144-PA OS=Aedes aegypti<br>PE=4 SV=1                                                    |
| CCG002220.1 | 543  | 156   | 10 | 12.3448961 | 0.643798836 | -4.26116092  | Down | 4.25E-42  | 1.91E-41   | AAEL010346-PA OS=Aedes aegypti<br>GN=AAEL010346 PE=4<br>SV=1                                   |
| CCG021406.1 | 2694 | 212   | 10 | 3.3814342  | 0.129763462 | -4.703679156 | Down | 2.58E-60  | 1.25E-59   | AAEL005240-PA OS=Aedes aegypti<br>GN=AAEL005240 PE=4<br>SV=1                                   |
| CCG012989.1 | 1125 | 226   | 10 | 8.63214224 | 0.310740238 | -4.795937664 | Down | 6.41E-65  | 3.13E-64   | AAEL005621-PA OS=Aedes aegypti<br>GN=GPROP5 PE=3 SV=1                                          |
| CCG008100.1 | 1407 | 289   | 10 | 8.82605068 | 0.248459679 | -5.150684384 | Down | 8.17E-86  | 4.20E-85   | AAEL011375-PA OS=Aedes aegypti<br>GN=AAEL011375 PE=3<br>SV=1                                   |
| CCG006228.1 | 1734 | 376   | 10 | 9.31754338 | 0.201604826 | -5.530347553 | Down | 5.51E-115 | 2.99E-114  | AAEL011774-PA OS=Aedes aegypti<br>GN=AAEL011774 PE=4<br>SV=1                                   |
| CCG017394.1 | 2847 | 856   | 10 | 12.9195971 | 0.122789873 | -6.717225688 | Down | 1.44E-278 | 8.98E-278  | AAEL006763-PA OS=Aedes aegypti<br>GN=AAEL006763 PE=4<br>SV=1                                   |
| CCG016157.1 | 591  | 1275  | 10 | 92.7012041 | 0.591510605 | -7.292040233 | Down | 0         | 0          | AGAP006829-PA OS=Anopheles gambiae<br>GN=CPR59 PE=4 SV=4                                       |
| CCG016889.1 | 1920 | 2686  | 10 | 60.1128683 | 0.182074358 | -8.367002291 | Down | 0         | 0          | AAEL009910-PA OS=Aedes aegypti<br>GN=AAEL009910 PE=4<br>SV=1                                   |
| CCG016890.1 | 900  | 4632  | 10 | 221.150901 | 0.388425297 | -9.153178239 | Down | 0         | 0          | AAEL009904-PA OS=Aedes aegypti<br>GN=AAEL009904 PE=4<br>SV=1                                   |
| CCG006366.1 | 1131 | 34833 | 10 | 1323.39944 | 0.309091749 | -12.06392581 | Down | 0         | 0          | AAEL009451-PA OS=Aedes aegypti<br>GN=AAEL009451 PE=3<br>SV=1                                   |
| CCG013365.1 | 1881 | 29    | 11 | 0.66247863 | 0.204434367 | -1.696236173 | Down | 0.0004498 | 0.00070891 | AAEL013026-PA (Fragment)<br>OS=Aedes aegypti<br>GN=AAEL013026 PE=3 SV=1                        |

|             |      |    |    |            |             |              |      |           |            |                                                                                                                 |
|-------------|------|----|----|------------|-------------|--------------|------|-----------|------------|-----------------------------------------------------------------------------------------------------------------|
| CCG002058.1 | 924  | 30 | 11 | 1.39512125 | 0.416169962 | -1.745145773 | Down | 0.0002703 | 0.00043136 | Putative uncharacterized protein<br>OS=Culex quinquefasciatus<br>GN=CpipJ_CPIJ007764 PE=4<br>SV_1               |
| CCG003719.1 | 283  | 34 | 11 | 5.16244161 | 1.358802277 | -1.925718019 | Down | 3.29E-05  | 5.57E-05   | -                                                                                                               |
| CCG019107.1 | 474  | 34 | 11 | 3.08221725 | 0.811268026 | -1.925718019 | Down | 3.29E-05  | 5.57E-05   | Putative uncharacterized protein<br>OS=Culex quinquefasciatus<br>GN=CpipJ_CPIJ008218 PE=4<br>SV_1               |
| CCG021701.1 | 1077 | 35 | 11 | 1.39641663 | 0.357048324 | -1.967538194 | Down | 1.91E-05  | 3.28E-05   | Translation elongation factor EF-1<br>alpha/Tu OS=Culex<br>quinquefasciatus<br>GN=CpipJ_CPIJ010941 PE=4<br>SV_1 |
| CCG012190.1 | 789  | 36 | 11 | 1.96059626 | 0.48737775  | -2.008180179 | Down | 1.10E-05  | 1.92E-05   | AAEL009233-PA (Fragment)<br>OS=Aedes aegypti<br>GN=AAEL009233 PE=4 SV=1                                         |
| CCG001469.1 | 1591 | 36 | 11 | 0.97228815 | 0.241697702 | -2.008180179 | Down | 1.10E-05  | 1.93E-05   | AAEL009966-PA OS=Aedes<br>aegypti GN=AAEL009966 PE=4<br>SV_1                                                    |
| CCG023394.1 | 1539 | 36 | 11 | 1.00513999 | 0.249864226 | -2.008180179 | Down | 1.10E-05  | 1.93E-05   | AAEL006846-PA OS=Aedes<br>aegypti GN=AAEL006846 PE=4<br>SV_1                                                    |
| CCG011348.1 | 1212 | 41 | 11 | 1.45359663 | 0.31727809  | -2.195807182 | Down | 6.54E-07  | 1.21E-06   | AAEL004174-PA OS=Aedes<br>aegypti GN=AAEL004174 PE=4<br>SV_1                                                    |
| CCG015828.1 | 1458 | 42 | 11 | 1.23781129 | 0.263745572 | -2.2305726   | Down | 3.66E-07  | 6.87E-07   | AAEL008336-PA (Fragment)<br>OS=Aedes aegypti<br>GN=AAEL008336 PE=4 SV=1                                         |
| CCG018005.1 | 777  | 42 | 11 | 2.32268836 | 0.494904819 | -2.2305726   | Down | 3.66E-07  | 6.87E-07   | AAEL004525-PA OS=Aedes<br>aegypti GN=AAEL004525 PE=4<br>SV_1                                                    |
| CCG014098.1 | 498  | 43 | 11 | 3.71023813 | 0.772170772 | -2.264519932 | Down | 2.04E-07  | 3.87E-07   | AAEL004627-PA OS=Aedes<br>aegypti GN=AAEL004627 PE=4<br>SV_1                                                    |
| CCG027837.1 | 363  | 45 | 11 | 5.3268266  | 1.05934172  | -2.330108274 | Down | 6.28E-08  | 1.22E-07   | AAEL017144-PA OS=Aedes<br>aegypti PE=4 SV=1                                                                     |
| CCG010055.1 | 339  | 45 | 11 | 5.70394707 | 1.134339364 | -2.330108274 | Down | 6.28E-08  | 1.22E-07   | Putative uncharacterized protein<br>OS=Culex quinquefasciatus<br>GN=CpipJ_CPIJ008247 PE=4<br>SV_1               |
| CCG001391.1 | 807  | 46 | 11 | 2.44932812 | 0.476506871 | -2.361817134 | Down | 3.46E-08  | 6.76E-08   | cGMP-dependent protein kinase<br>OS=Aedes aegypti<br>GN=AAEL007826 PE=3 SV=1                                    |

|             |      |     |    |            |             |              |      |          |          |                                                                                                       |
|-------------|------|-----|----|------------|-------------|--------------|------|----------|----------|-------------------------------------------------------------------------------------------------------|
| CCG024997.1 | 456  | 51  | 11 | 4.80582558 | 0.843291764 | -2.51068052  | Down | 1.67E-09 | 3.41E-09 | AAEL002626-PA OS=Aedes aegypti GN=AAEL002626 PE=4 SV=1                                                |
| CCG024241.1 | 627  | 51  | 11 | 3.49514588 | 0.613303101 | -2.51068052  | Down | 1.67E-09 | 3.41E-09 | AAEL002839-PA (Fragment) OS=Aedes aegypti GN=AAEL002839 PE=4 SV=1                                     |
| CCG027162.1 | 768  | 51  | 11 | 2.85345894 | 0.500704485 | -2.51068052  | Down | 1.67E-09 | 3.41E-09 | AAEL012065-PA OS=Aedes aegypti GN=AAEL012065 PE=4 SV=1                                                |
| CCG006669.1 | 3183 | 54  | 11 | 0.72898702 | 0.120810884 | -2.59314268  | Down | 2.60E-10 | 5.47E-10 | AAEL010252-PA OS=Aedes aegypti GN=AAEL010252 PE=4 SV=1                                                |
| CCG000208.1 | 1915 | 54  | 11 | 1.2116792  | 0.200804723 | -2.59314268  | Down | 2.60E-10 | 5.47E-10 | Putative finger protein OS=Culex quinquefasciatus GN=CpipJ_CPIJ014131 PE=4 SV=1                       |
| CCG023554.1 | 1320 | 60  | 11 | 1.95316976 | 0.291318973 | -2.745145773 | Down | 5.85E-12 | 1.32E-11 | -                                                                                                     |
| CCG017022.1 | 578  | 62  | 11 | 4.60921029 | 0.665295925 | -2.792451488 | Down | 1.62E-12 | 3.89E-12 | -                                                                                                     |
| CCG000580.1 | 1401 | 63  | 11 | 1.93225787 | 0.27447612  | -2.815535101 | Down | 8.50E-13 | 2.12E-12 | Cadherin EGF LAG seven-pass G-type receptor 1 OS=Culex quinquefasciatus GN=CpipJ_CPIJ002422 PE=4 SV=1 |
| CCG022514.1 | 666  | 64  | 11 | 4.12922375 | 0.577388956 | -2.838255178 | Down | 4.45E-13 | 1.17E-12 | AAEL014418-PA OS=Aedes aegypti GN=AAEL014418 PE=4 SV=1                                                |
| CCG018054.1 | 303  | 65  | 11 | 9.21792987 | 1.269112358 | -2.860622991 | Down | 2.32E-13 | 6.62E-13 | AAEL011332-PA OS=Aedes aegypti GN=AAEL011332 PE=4 SV=1                                                |
| CCG026535.1 | 963  | 68  | 11 | 3.03420764 | 0.399315726 | -2.925718019 | Down | 3.27E-14 | 1.13E-13 | AAEL002716-PA OS=Aedes aegypti GN=AAEL002716 PE=4 SV=1                                                |
| CCG009324.1 | 1632 | 69  | 11 | 1.8167351  | 0.23562564  | -2.946779634 | Down | 1.69E-14 | 5.97E-14 | AAEL008129-PA OS=Aedes aegypti GN=AAEL008129 PE=4 SV=1                                                |
| CCG011777.1 | 219  | 88  | 11 | 17.2663774 | 1.75589518  | -3.297686796 | Down | 4.66E-20 | 1.82E-19 | AAEL011768-PA OS=Aedes aegypti GN=AAEL011768 PE=4 SV=1                                                |
| CCG022049.1 | 1417 | 97  | 11 | 2.94147089 | 0.271376884 | -3.43816802  | Down | 9.20E-23 | 3.67E-22 | Putative uncharacterized protein OS=Tribolium castaneum GN=TcasGA2_TC004282 PE=4 SV=1                 |
| CCG012810.1 | 3279 | 103 | 11 | 1.34976599 | 0.117273878 | -3.524755705 | Down | 1.38E-24 | 5.60E-24 | Uncharacterized protein OS=Anopheles darlingi GN=AND_23101 PE=4 SV=1                                  |



|             |      |      |    |            |             |              |      |           |            |                                                                             |
|-------------|------|------|----|------------|-------------|--------------|------|-----------|------------|-----------------------------------------------------------------------------|
| CCG026967.1 | 2130 | 106  | 11 | 2.13839994 | 0.180535702 | -3.566175632 | Down | 1.67E-25  | 6.84E-25   | Imp4 OS=Culex quinquefasciatus<br>GN=CpipJ_CPIJ017542 PE=4<br>SV=1          |
| CCG005261.1 | 489  | 114  | 11 | 10.0174841 | 0.786382504 | -3.671145192 | Down | 5.80E-28  | 2.41E-27   | AAEL008765-PA OS=Aedes<br>aegypti GN=AAEL008765 PE=4<br>SV=1                |
| CCG024294.1 | 1611 | 127  | 11 | 3.38743408 | 0.23869711  | -3.826939864 | Down | 5.27E-32  | 2.24E-31   | AAEL007582-PA OS=Aedes<br>aegypti GN=AAEL007582 PE=3<br>SV=1                |
| CCG005575.1 | 300  | 164  | 11 | 23.4901216 | 1.281803482 | -4.195807182 | Down | 9.96E-44  | 4.52E-43   | Uncharacterized protein<br>OS=Anopheles darlingi<br>GN=AND_27279 PE=4 SV=1  |
| CCG010610.1 | 1626 | 169  | 11 | 4.46610403 | 0.236495107 | -4.239134614 | Down | 2.48E-45  | 1.13E-44   | AAEL003426-PA (Fragment)<br>OS=Aedes aegypti<br>GN=AAEL003426 PE=4 SV=1     |
| CCG012476.1 | 943  | 178  | 11 | 8.11093612 | 0.407784777 | -4.313988609 | Down | 3.15E-48  | 1.46E-47   | AAEL015464-PA OS=Aedes<br>aegypti GN=AAEL015464 PE=3<br>SV=1                |
| CCG007339.1 | 1833 | 201  | 11 | 4.71190216 | 0.209787804 | -4.489306869 | Down | 1.12E-55  | 5.32E-55   | Putative Ropn11-like protein<br>OS=Anopheles gambiae PE=2<br>SV=1           |
| CCG001442.1 | 918  | 211  | 11 | 9.87648584 | 0.418890027 | -4.559354366 | Down | 6.18E-59  | 2.96E-58   | AAEL003216-PA OS=Aedes<br>aegypti GN=AAEL003216 PE=4<br>SV=1                |
| CCG012988.1 | 1125 | 404  | 11 | 15.4309091 | 0.341814262 | -5.49646666  | Down | 4.17E-123 | 2.29E-122  | AAEL005625-PA OS=Aedes<br>aegypti GN=GPROP4 PE=3 SV=1                       |
| CCG006836.1 | 1062 | 505  | 11 | 20.4328776 | 0.362091379 | -5.818394755 | Down | 3.20E-157 | 1.83E-156  | AAEL001745-PA OS=Aedes<br>aegypti GN=AAEL001745 PE=4<br>SV=1                |
| CCG019360.1 | 432  | 505  | 11 | 50.230824  | 0.890141307 | -5.818394755 | Down | 3.20E-157 | 1.83E-156  | AAEL008681-PA OS=Aedes<br>aegypti GN=CTL12 PE=4 SV=1                        |
| CCG014523.1 | 621  | 2769 | 11 | 191.599348 | 0.619228735 | -8.273404516 | Down | 0         | 0          | AAEL010824-PA OS=Aedes<br>aegypti GN=AAEL010824 PE=4<br>SV=1                |
| CCG005687.1 | 1407 | 30   | 12 | 0.91619903 | 0.298151614 | -1.619614891 | Down | 0.0005521 | 0.0008649  | AAEL009592-PA OS=Aedes<br>aegypti GN=AAEL009592 PE=4<br>SV=1                |
| CCG000656.1 | 329  | 32   | 12 | 4.17942707 | 1.275073925 | -1.712724295 | Down | 0.0002037 | 0.00032732 | Cecropin A OS=Culex<br>quinquefasciatus<br>GN=CpipJ_CPIJ010699 PE=4<br>SV=1 |
| CCG006655.1 | 456  | 33   | 12 | 3.10965185 | 0.919954652 | -1.757118415 | Down | 0.0001224 | 0.0001989  | AAEL008573-PA (Fragment)<br>OS=Aedes aegypti<br>GN=AAEL008573 PE=4 SV=1     |

|             |      |     |    |            |             |              |      |           |            |                                                                                          |
|-------------|------|-----|----|------------|-------------|--------------|------|-----------|------------|------------------------------------------------------------------------------------------|
| CCG011871.1 | 1339 | 33  | 12 | 1.05900018 | 0.313292996 | -1.757118415 | Down | 0.0001224 | 0.00019891 | Putative uncharacterized protein OS=Culex quinquefasciatus GN=CpipJ_CPIJ001097 PE=4 SV=1 |
| CCG009455.1 | 674  | 38  | 12 | 2.42262599 | 0.622402554 | -1.960651809 | Down | 8.69E-06  | 1.52E-05   | -                                                                                        |
| CCG028205.1 | 1701 | 38  | 12 | 0.95993528 | 0.246619236 | -1.960651809 | Down | 8.69E-06  | 1.52E-05   | AAEL013023-PA OS=Aedes aegypti GN=AAEL013023 PE=4 SV=1                                   |
| CCG007225.1 | 618  | 40  | 12 | 2.7812126  | 0.678801491 | -2.03465239  | Down | 2.90E-06  | 5.21E-06   | AAEL012571-PA OS=Aedes aegypti GN=AAEL012571 PE=4 SV=1                                   |
| CCG028402.1 | 849  | 41  | 12 | 2.07509908 | 0.494109919 | -2.0702763   | Down | 1.66E-06  | 3.03E-06   | AgCP7521-like protein (Fragment) OS=Aedes albopictus PE=4 SV=1                           |
| CCG014369.1 | 687  | 41  | 12 | 2.56442375 | 0.610624922 | -2.0702763   | Down | 1.66E-06  | 3.03E-06   | AAEL014864-PA OS=Aedes aegypti GN=AAEL014864 PE=4 SV=1                                   |
| CCG015660.1 | 1087 | 42  | 12 | 1.66028413 | 0.385923939 | -2.105041718 | Down | 9.47E-07  | 1.75E-06   | -                                                                                        |
| CCG023872.1 | 573  | 43  | 12 | 3.22460487 | 0.732110508 | -2.13898905  | Down | 5.37E-07  | 1.00E-06   | AAEL011492-PA OS=Aedes aegypti GN=AAEL011492 PE=4 SV=1                                   |
| CCG014181.1 | 1593 | 47  | 12 | 1.2677825  | 0.263339185 | -2.267313147 | Down | 5.34E-08  | 1.04E-07   | AAEL002623-PA OS=Aedes aegypti GN=AAEL002623 PE=4 SV=1                                   |
| CCG016075.1 | 957  | 54  | 12 | 2.42462452 | 0.438348298 | -2.467611798 | Down | 8.13E-10  | 1.68E-09   | Zinc carboxypeptidase OS=Culex quinquefasciatus GN=CpipJ_CPIJ010796 PE=4 SV=1            |
| CCG005895.1 | 762  | 57  | 12 | 3.21427149 | 0.550524044 | -2.54561431  | Down | 1.29E-10  | 2.75E-10   | AAEL002954-PA OS=Aedes aegypti GN=AAEL002954 PE=4 SV=1                                   |
| CCG003222.1 | 1893 | 60  | 12 | 1.36195672 | 0.221605558 | -2.619614891 | Down | 1.99E-11  | 4.36E-11   | AAEL008325-PA OS=Aedes aegypti GN=AAEL008325 PE=4 SV=1                                   |
| CCG026997.1 | 378  | 73  | 12 | 8.2983879  | 1.109786564 | -2.902548854 | Down | 4.79E-15  | 1.73E-14   | AAEL017144-PA OS=Aedes aegypti PE=4 SV=1                                                 |
| CCG017612.1 | 726  | 75  | 12 | 4.43902217 | 0.577822757 | -2.941542986 | Down | 1.29E-15  | 4.69E-15   | Probable transport protein Sec61 alpha subunit OS=Aedes aegypti GN=Sec61 PE=2 SV=1       |
| CCG022339.1 | 396  | 80  | 12 | 8.68075447 | 1.05934172  | -3.03465239  | Down | 4.71E-17  | 1.78E-16   | -                                                                                        |
| CCG003722.1 | 1416 | 83  | 12 | 2.5187062  | 0.296256583 | -3.087763727 | Down | 6.35E-18  | 2.42E-17   | AAEL007806-PA OS=Aedes aegypti GN=CYP4D39 PE=3 SV=1                                      |
| CCG022575.1 | 442  | 89  | 12 | 8.65227688 | 0.949093487 | -3.188457726 | Down | 1.11E-19  | 4.31E-19   | -                                                                                        |
| CCG025138.1 | 534  | 105 | 12 | 8.44910512 | 0.785579253 | -3.426969813 | Down | 1.85E-24  | 7.49E-24   | AAEL011642-PA OS=Aedes aegypti GN=AAEL011642 PE=4 SV=1                                   |

|             |      |      |    |            |             |              |      |           |            |                                                                        |
|-------------|------|------|----|------------|-------------|--------------|------|-----------|------------|------------------------------------------------------------------------|
| CCG007231.1 | 1743 | 114  | 12 | 2.81041293 | 0.240676604 | -3.54561431  | Down | 3.41E-27  | 1.41E-26   | AAEL010201-PA OS=Aedes aegypti GN=AAEL010201 PE=4 SV=1                 |
| CCG026150.1 | 2646 | 115  | 12 | 1.86754327 | 0.158540938 | -3.558214346 | Down | 1.69E-27  | 6.98E-27   | AAEL000778-PA OS=Aedes aegypti GN=AAEL000778 PE=4 SV=1                 |
| CCG023260.1 | 1275 | 142  | 12 | 4.78564887 | 0.329019076 | -3.862471415 | Down | 7.22E-36  | 3.15E-35   | AAEL0006994-PA OS=Aedes aegypti GN=AAEL006994 PE=4 SV=1                |
| CCG007287.1 | 2055 | 145  | 12 | 3.03192775 | 0.204135923 | -3.892633385 | Down | 8.26E-37  | 3.62E-36   | AAEL000247-PA OS=Aedes aegypti GN=AAEL000247 PE=4 SV=1                 |
| CCG016642.1 | 2024 | 155  | 12 | 3.29066644 | 0.207262511 | -3.988848701 | Down | 5.82E-40  | 2.60E-39   | AAEL0009966-PA OS=Aedes aegypti GN=AAEL009966 PE=4 SV=1                |
| CCG013211.1 | 648  | 157  | 12 | 10.4108771 | 0.647375496 | -4.007345044 | Down | 1.35E-40  | 6.06E-40   | AAEL005770-PA OS=Aedes aegypti GN=AAEL005770 PE=4 SV=1                 |
| CCG000082.1 | 1779 | 166  | 12 | 4.00954241 | 0.235806251 | -4.087763727 | Down | 1.88E-43  | 8.53E-43   | AAEL001835-PA OS=Aedes aegypti GN=AAEL001835 PE=3 SV=1                 |
| CCG025094.1 | 1335 | 246  | 12 | 7.91801851 | 0.314231701 | -4.655238801 | Down | 2.46E-69  | 1.22E-68   | Ams protein transcript variant 1 (Fragment) OS=Aedes aegypti PE=2 SV=1 |
| CCG022279.1 | 3624 | 580  | 12 | 6.87705466 | 0.115755883 | -5.892633385 | Down | 3.04E-181 | 1.78E-180  | AAEL005967-PA OS=Aedes aegypti GN=AAEL005967 PE=4 SV=1                 |
| CCG018643.1 | 711  | 748  | 12 | 45.205853  | 0.59001311  | -6.259618755 | Down | 2.01E-238 | 1.23E-237  | AAEL009577-PA OS=Aedes aegypti GN=AAEL009577 PE=4 SV=1                 |
| CCG017802.1 | 351  | 931  | 12 | 113.973854 | 1.195154761 | -6.575361653 | Down | 5.28E-301 | 3.33E-300  | -                                                                      |
| CCG011672.1 | 483  | 2087 | 12 | 185.668398 | 0.868528615 | -7.739939181 | Down | 0         | 0          | -                                                                      |
| CCG025882.1 | 348  | 0    | 13 | 0.001      | 1.305912638 | 10.35084267  | Up   | 0.0004804 | 0.00075505 | AAEL013443-PA OS=Aedes aegypti GN=AAEL013443 PE=4 SV=1                 |
| CCG009113.1 | 445  | 0    | 13 | 0.001      | 1.021253029 | 9.996124642  | Up   | 0.0004804 | 0.00075556 | -                                                                      |
| CCG001329.1 | 462  | 0    | 13 | 0.001      | 0.983674455 | 9.942037127  | Up   | 0.0004804 | 0.00075585 | AAEL004611-PA OS=Aedes aegypti GN=AAEL004611 PE=4 SV=1                 |
| CCG017910.1 | 465  | 0    | 13 | 0.001      | 0.977328168 | 9.932699262  | Up   | 0.0004804 | 0.00075523 | AAEL004145-PA OS=Aedes aegypti GN=AAEL004145 PE=4 SV=1                 |
| CCG010936.1 | 486  | 0    | 13 | 0.001      | 0.935097938 | 9.868973665  | Up   | 0.0004804 | 0.0007558  | -                                                                      |
| CCG008688.1 | 507  | 0    | 13 | 0.001      | 0.896366071 | 9.807944231  | Up   | 0.0004804 | 0.00075566 | AAEL004355-PA OS=Aedes aegypti GN=AAEL004355 PE=4 SV=1                 |
| CCG002798.1 | 538  | 0    | 13 | 0.001      | 0.844716725 | 9.722323806  | Up   | 0.0004804 | 0.00075528 | -                                                                      |

|             |      |    |    |            |             |              |      |           |            |                                                                                              |
|-------------|------|----|----|------------|-------------|--------------|------|-----------|------------|----------------------------------------------------------------------------------------------|
| CCG009511.1 | 600  | 0  | 13 | 0.001      | 0.75742933  | 9.564967478  | Up   | 0.0004804 | 0.000755   | AAEL001383-PA OS=Aedes aegypti GN=AAEL001383 PE=4 SV=1                                       |
| CCG022386.1 | 604  | 0  | 13 | 0.001      | 0.752413242 | 9.555381429  | Up   | 0.0004804 | 0.00075547 | -                                                                                            |
| CCG019765.1 | 693  | 0  | 13 | 0.001      | 0.65578297  | 9.357074626  | Up   | 0.0004804 | 0.00075538 | AAEL004751-PA OS=Aedes aegypti GN=AAEL004751 PE=4 SV=1                                       |
| CCG009150.1 | 744  | 0  | 13 | 0.001      | 0.610830105 | 9.254627357  | Up   | 0.0004804 | 0.00075514 | -                                                                                            |
| CCG025268.1 | 972  | 0  | 13 | 0.001      | 0.467548969 | 8.868973665  | Up   | 0.0004804 | 0.00075561 | AAEL007999-PA OS=Aedes aegypti GN=AAEL007999 PE=4 SV=1                                       |
| CCG003137.1 | 1032 | 0  | 13 | 0.001      | 0.44036589  | 8.782558913  | Up   | 0.0004804 | 0.00075571 | AAEL015565-PA OS=Aedes aegypti GN=AAEL015565 PE=4 SV=1                                       |
| CCG021419.1 | 1152 | 0  | 13 | 0.001      | 0.394494443 | 8.623861167  | Up   | 0.0004804 | 0.00075575 | AAEL010973-PA OS=Aedes aegypti GN=AAEL010973 PE=4 SV=1                                       |
| CCG019144.1 | 1170 | 0  | 13 | 0.001      | 0.388425297 | 8.601493354  | Up   | 0.0004804 | 0.00075589 | AAEL006371-PA OS=Aedes aegypti GN=AAEL006371 PE=3 SV=1                                       |
| CCG025364.1 | 1593 | 0  | 13 | 0.001      | 0.285284117 | 8.156255617  | Up   | 0.0004804 | 0.00075519 | AAEL009243-PA OS=Aedes aegypti GN=AAEL009243 PE=3 SV=1                                       |
| CCG011001.1 | 1617 | 0  | 13 | 0.001      | 0.281049844 | 8.134682205  | Up   | 0.0004804 | 0.00075509 | Putative uncharacterized protein GLEAN_15470 OS=Tribolium castaneum GN=GLEAN_15470 PE=4 SV=1 |
| CCG004788.1 | 1896 | 0  | 13 | 0.001      | 0.239692826 | 7.905042919  | Up   | 0.0004804 | 0.00075552 | -                                                                                            |
| CCG006667.1 | 2652 | 0  | 13 | 0.001      | 0.171364102 | 7.420921108  | Up   | 0.0004804 | 0.00075542 | Uncharacterized protein OS=Anopheles darlingi GN=AND_19618 PE=4 SV=1                         |
| CCG007445.1 | 2793 | 0  | 13 | 0.001      | 0.162713068 | 7.34618631   | Up   | 0.0004804 | 0.00075533 | AAEL006287-PA OS=Aedes aegypti GN=PIWI7 PE=4 SV=1                                            |
| CCG004026.1 | 4278 | 32 | 13 | 0.32141924 | 0.106231323 | -1.597247078 | Down | 0.0004101 | 0.0006481  | AAEL001543-PA OS=Aedes aegypti GN=AAEL001543 PE=4 SV=1                                       |
| CCG000297.1 | 1125 | 32 | 13 | 1.22225023 | 0.403962309 | -1.597247078 | Down | 0.0004101 | 0.00064802 | AAEL009865-PA OS=Aedes aegypti GN=AAEL009865 PE=4 SV=1                                       |
| CCG002856.1 | 1387 | 32 | 13 | 0.99137095 | 0.327655081 | -1.597247078 | Down | 0.0004101 | 0.00064806 | -                                                                                            |
| CCG023345.1 | 663  | 34 | 13 | 2.20357613 | 0.685456407 | -1.684709919 | Down | 0.000153  | 0.0002474  | AAEL002255-PA OS=Aedes aegypti GN=AAEL002255 PE=4 SV=1                                       |

|             |      |     |    |            |             |              |      |          |            |                                                                                                   |
|-------------|------|-----|----|------------|-------------|--------------|------|----------|------------|---------------------------------------------------------------------------------------------------|
| CCG008316.1 | 1146 | 34  | 13 | 1.27484378 | 0.396559859 | -1.684709919 | Down | 0.000153 | 0.00024738 | Putative uncharacterized protein<br>OS=Culex quinquefasciatus<br>GN=CpipJ_CPIJ014452 PE=4<br>SV=1 |
| CCG023322.1 | 492  | 34  | 13 | 2.9694532  | 0.923694305 | -1.684709919 | Down | 0.000153 | 0.00024736 | AAEL005184-PA OS=Aedes<br>aegypti GN=AAEL005184 PE=4<br>SV=1                                      |
| CCG016436.1 | 1515 | 35  | 13 | 0.99270014 | 0.299972012 | -1.726530095 | Down | 9.25E-05 | 0.00015241 | AAEL003653-PA OS=Aedes<br>aegypti GN=SRPN12 PE=4 SV=2                                             |
| CCG013982.1 | 1302 | 36  | 13 | 1.18810326 | 0.349045774 | -1.767172079 | Down | 5.56E-05 | 9.26E-05   | AAEL004231-PA OS=Aedes<br>aegypti GN=AAEL004231 PE=4<br>SV=1                                      |
| CCG016634.1 | 624  | 39  | 13 | 2.68560841 | 0.728297433 | -1.882649297 | Down | 1.16E-05 | 2.02E-05   | AAEL009567-PA OS=Aedes<br>aegypti GN=AAEL009567 PE=4<br>SV=1                                      |
| CCG001379.1 | 2847 | 42  | 13 | 0.63390546 | 0.159626835 | -1.989564501 | Down | 2.30E-06 | 4.16E-06   | AAEL005045-PA OS=Aedes<br>aegypti GN=AAEL005045 PE=3<br>SV=1                                      |
| CCG010918.1 | 723  | 43  | 13 | 2.55559971 | 0.628572058 | -2.023511833 | Down | 1.33E-06 | 2.43E-06   | AAEL000336-PA OS=Aedes<br>aegypti GN=AAEL000336 PE=4<br>SV=1                                      |
| CCG026239.1 | 1107 | 53  | 13 | 2.05726823 | 0.410530802 | -2.325167533 | Down | 4.32E-09 | 8.72E-09   | AAEL002954-PA OS=Aedes<br>aegypti GN=AAEL002954 PE=4<br>SV=1                                      |
| CCG018187.1 | 222  | 61  | 13 | 11.8069991 | 2.047106297 | -2.527984416 | Down | 3.44E-11 | 7.45E-11   | Putative uncharacterized protein<br>OS=Culex quinquefasciatus<br>GN=CpipJ_CPIJ004854 PE=4<br>SV=1 |
| CCG012482.1 | 576  | 78  | 13 | 5.81881823 | 0.788988885 | -2.882649297 | Down | 7.02E-16 | 2.56E-15   | -                                                                                                 |
| CCG001823.1 | 2223 | 84  | 13 | 1.62368768 | 0.204434367 | -2.989564501 | Down | 1.36E-17 | 5.19E-17   | Putative uncharacterized protein<br>OS=Culex quinquefasciatus<br>GN=CpipJ_CPIJ013073 PE=4<br>SV=1 |
| CCG001000.1 | 2333 | 87  | 13 | 1.60238616 | 0.19479537  | -3.040190574 | Down | 1.86E-18 | 7.14E-18   | Putative uncharacterized protein<br>OS=Tribolium castaneum<br>GN=TcasGA2_TC004811 PE=4<br>SV=1    |
| CCG023396.1 | 1668 | 93  | 13 | 2.39579456 | 0.272456594 | -3.136405889 | Down | 3.34E-20 | 1.31E-19   | AAEL003564-PA OS=Aedes<br>aegypti GN=AAEL003564 PE=4<br>SV=1                                      |
| CCG015019.1 | 582  | 108 | 13 | 7.97376519 | 0.780854979 | -3.35213458  | Down | 1.19E-24 | 4.84E-24   | AAEL010664-PA OS=Aedes<br>aegypti GN=AAEL010664 PE=3<br>SV=1                                      |
| CCG003992.1 | 771  | 125 | 13 | 6.96655879 | 0.589439167 | -3.563031363 | Down | 8.42E-30 | 3.54E-29   | AAEL011457-PA OS=Aedes<br>aegypti GN=AAEL011457 PE=4<br>SV=1                                      |

|             |       |      |    |            |             |              |      |           |            |                                                                                          |
|-------------|-------|------|----|------------|-------------|--------------|------|-----------|------------|------------------------------------------------------------------------------------------|
| CCG005890.1 | 1212  | 183  | 13 | 6.48800448 | 0.374965015 | -4.112946916 | Down | 5.82E-48  | 2.69E-47   | AAEL012096-PA OS=Aedes aegypti GN=AAEL012096 PE=4 SV=1                                   |
| CCG016355.1 | 198   | 279  | 13 | 60.5482624 | 2.295240394 | -4.72136839  | Down | 4.31E-79  | 2.18E-78   | -                                                                                        |
| CCG007166.1 | 417   | 281  | 13 | 28.9556245 | 1.089826374 | -4.731673398 | Down | 9.49E-80  | 4.81E-79   | AAEL004339-PA OS=Aedes aegypti GN=AAEL004339 PE=4 SV=1                                   |
| CCG000876.1 | 1623  | 354  | 13 | 9.37232659 | 0.280010843 | -5.064852628 | Down | 6.77E-104 | 3.61E-103  | AAEL006339-PA OS=Aedes aegypti GN=AAEL006339 PE=4 SV=1                                   |
| CCG026140.1 | 696   | 512  | 13 | 31.6099197 | 0.652956319 | -5.597247078 | Down | 7.33E-157 | 4.20E-156  | AAEL003501-PA OS=Aedes aegypti GN=AAEL003501 PE=4 SV=1                                   |
| CCG021228.1 | 13725 | 929  | 13 | 2.90847967 | 0.033111665 | -6.456781864 | Down | 1.02E-298 | 6.44E-298  | AAEL007225-PA OS=Aedes aegypti GN=AAEL007225 PE=4 SV=1                                   |
| CCG004326.1 | 1458  | 1098 | 13 | 32.3599236 | 0.311699313 | -6.697909417 | Down | 0         | 0          | Putative uncharacterized protein OS=Culex quinquefasciatus GN=CpipJ_CPIJ000931 PE=4 SV=1 |
| CCG016569.1 | 801   | 1202 | 13 | 64.4814245 | 0.567362794 | -6.828468259 | Down | 0         | 0          | AAEL010186-PA OS=Aedes aegypti GN=AAEL010186 PE=4 SV=1                                   |
| CCG020646.1 | 271   | 0    | 14 | 0.001      | 1.805962638 | 10.81855233  | Up   | 0.0002649 | 0.00042314 | -                                                                                        |
| CCG015948.1 | 282   | 0    | 14 | 0.001      | 1.735517287 | 10.76115002  | Up   | 0.0002649 | 0.00042325 | AAEL005702-PA OS=Aedes aegypti GN=AAEL005702 PE=4 SV=1                                   |
| CCG023240.1 | 309   | 0    | 14 | 0.001      | 1.583870145 | 10.62923834  | Up   | 0.0002649 | 0.00042309 | AAEL012826-PA OS=Aedes aegypti GN=AAEL012826 PE=4 SV=1                                   |
| CCG001883.1 | 342   | 0    | 14 | 0.001      | 1.43104057  | 10.48284886  | Up   | 0.0002649 | 0.00042344 | -                                                                                        |
| CCG027975.1 | 351   | 0    | 14 | 0.001      | 1.394347222 | 10.44537415  | Up   | 0.0002649 | 0.00042338 | -                                                                                        |
| CCG014996.1 | 357   | 0    | 14 | 0.001      | 1.370912815 | 10.42092111  | Up   | 0.0002649 | 0.0004229  | -                                                                                        |
| CCG028611.1 | 528   | 0    | 14 | 0.001      | 0.926924005 | 9.856307253  | Up   | 0.0002649 | 0.00042341 | AAEL011712-PA OS=Aedes aegypti GN=AAEL011712 PE=4 SV=1                                   |
| CCG004271.1 | 670   | 0    | 14 | 0.001      | 0.730471455 | 9.512684087  | Up   | 0.0002649 | 0.00042336 | Gag polyprotein OS=Anopheles gambiae PE=4 SV=1                                           |
| CCG009507.1 | 732   | 0    | 14 | 0.001      | 0.668600922 | 9.385001534  | Up   | 0.0002649 | 0.00042333 | AAEL014647-PA OS=Aedes aegypti GN=AAEL014647 PE=4 SV=1                                   |
| CCG028209.1 | 776   | 0    | 14 | 0.001      | 0.63069056  | 9.30078853   | Up   | 0.0002649 | 0.00042293 | AAEL009165-PA OS=Aedes aegypti GN=AAEL009165 PE=4 SV=1                                   |
| CCG000163.1 | 788   | 0    | 14 | 0.001      | 0.621086136 | 9.278649553  | Up   | 0.0002649 | 0.00042328 | AAEL009165-PA OS=Aedes aegypti GN=AAEL009165 PE=4 SV=1                                   |

|             |      |    |    |            |             |              |      |           |            |                                                                                             |
|-------------|------|----|----|------------|-------------|--------------|------|-----------|------------|---------------------------------------------------------------------------------------------|
| CCG000733.1 | 794  | 0  | 14 | 0.001      | 0.616392789 | 9.267706175  | Up   | 0.0002649 | 0.00042312 | AAEL013652-PA OS=Aedes aegypti GN=AAEL013652 PE=3 SV=1                                      |
| CCG028103.1 | 816  | 0  | 14 | 0.001      | 0.599774356 | 9.22827603   | Up   | 0.0002649 | 0.00042317 | AAEL005607-PA OS=Aedes aegypti GN=AAEL005607 PE=3 SV=1                                      |
| CCG012066.1 | 825  | 0  | 14 | 0.001      | 0.593231363 | 9.212451063  | Up   | 0.0002649 | 0.00042306 | AAEL012564-PA OS=Aedes aegypti GN=AAEL012564 PE=3 SV=1                                      |
| CCG004721.2 | 832  | 0  | 14 | 0.001      | 0.588240234 | 9.200261654  | Up   | 0.0002649 | 0.00042322 | Putative uncharacterized protein OS=Culex quinquefasciatus GN=CpipJ_CPIJ014613 PE=4 SV=1    |
| CCG022315.1 | 981  | 0  | 14 | 0.001      | 0.498894877 | 8.962592046  | Up   | 0.0002649 | 0.00042301 | Uncharacterized protein OS=Anopheles darlingi GN=AND_21982 PE=4 SV=1                        |
| CCG021767.1 | 1050 | 0  | 14 | 0.001      | 0.466110357 | 8.86452776   | Up   | 0.0002649 | 0.00042298 | Putative uncharacterized protein (Fragment) OS=Camponotus floridanus GN=EAG_00896 PE=4 SV=1 |
| CCG003429.1 | 1257 | 0  | 14 | 0.001      | 0.389352327 | 8.604932438  | Up   | 0.0002649 | 0.0004233  | AAEL009473-PA OS=Aedes aegypti GN=AAEL009473 PE=4 SV=1                                      |
| CCG021055.1 | 1398 | 0  | 14 | 0.001      | 0.350082886 | 8.451552727  | Up   | 0.0002649 | 0.00042295 | Putative uncharacterized protein (Fragment) OS=Solenopsis invicta GN=SINV_08164 PE=4 SV=1   |
| CCG027428.1 | 1491 | 0  | 14 | 0.001      | 0.32824673  | 8.35863683   | Up   | 0.0002649 | 0.0004232  | AAEL005151-PA OS=Aedes aegypti GN=AAEL005151 PE=4 SV=1                                      |
| CCG023244.1 | 1533 | 0  | 14 | 0.001      | 0.319253669 | 8.318559391  | Up   | 0.0002649 | 0.00042304 | AAEL007377-PA OS=Aedes aegypti GN=AAEL007377 PE=4 SV=1                                      |
| CCG023757.1 | 878  | 34 | 14 | 1.66397606 | 0.55742127  | -1.577794715 | Down | 0.0003044 | 0.00048409 | AAEL002834-PA OS=Aedes aegypti GN=AAEL002834 PE=4 SV=1                                      |
| CCG015189.1 | 696  | 34 | 14 | 2.09909623 | 0.703183728 | -1.577794715 | Down | 0.0003044 | 0.00048406 | Polyprotein-like OS=Solanum chilense PE=4 SV=1                                              |
| CCG015091.1 | 459  | 34 | 14 | 3.1829433  | 1.066265522 | -1.577794715 | Down | 0.0003044 | 0.00048412 | AGAP003568-PA OS=Anopheles gambiae GN=AgaP_AGAP003568 PE=4 SV=4                             |
| CCG007135.1 | 960  | 36 | 14 | 1.61136505 | 0.509808203 | -1.660256876 | Down | 0.0001148 | 0.00018677 | AAEL000266-PA (Fragment) OS=Aedes aegypti GN=GPRNNA21 PE=4 SV=1                             |

|             |      |    |    |            |             |              |      |           |            |                                                                   |
|-------------|------|----|----|------------|-------------|--------------|------|-----------|------------|-------------------------------------------------------------------|
| CCG002782.1 | 844  | 36 | 14 | 1.83283228 | 0.579876629 | -1.660256876 | Down | 0.0001148 | 0.00018678 | -                                                                 |
| CCG011668.1 | 1068 | 36 | 14 | 1.44841802 | 0.458254564 | -1.660256876 | Down | 0.0001148 | 0.00018676 | AAEL004360-PA OS=Aedes aegypti GN=AAEL004360 PE=4 SV=1            |
| CCG006193.1 | 1695 | 38 | 14 | 0.96333328 | 0.288740929 | -1.738259388 | Down | 4.21E-05  | 7.10E-05   | AAEL002067-PA (Fragment) OS=Aedes aegypti GN=AAEL002067 PE=3 SV=1 |
| CCG000640.1 | 1864 | 38 | 14 | 0.87599244 | 0.262562165 | -1.738259388 | Down | 4.21E-05  | 7.10E-05   | AAEL009100-PA OS=Aedes aegypti GN=AAEL009100 PE=3 SV=1            |
| CCG024318.1 | 714  | 38 | 14 | 2.28690464 | 0.685456407 | -1.738259388 | Down | 4.21E-05  | 7.10E-05   | AGAP013309-PA OS=Anopheles gambiae GN=AgaP_AGAP013309 PE=4 SV=1   |
| CCG011465.1 | 627  | 39 | 14 | 2.67275861 | 0.780567583 | -1.775734093 | Down | 2.53E-05  | 4.33E-05   | AAEL009950-PA OS=Aedes aegypti GN=AAEL009950 PE=3 SV=1            |
| CCG021832.1 | 627  | 40 | 14 | 2.74129088 | 0.780567583 | -1.812259969 | Down | 1.51E-05  | 2.62E-05   | AAEL009784-PA OS=Aedes aegypti GN=AAEL009784 PE=4 SV=1            |
| CCG009935.1 | 2331 | 41 | 14 | 0.75579542 | 0.20995962  | -1.847883879 | Down | 8.96E-06  | 1.57E-05   | AAEL002732-PA (Fragment) OS=Aedes aegypti GN=AAEL002732 PE=4 SV=1 |
| CCG027048.1 | 1350 | 44 | 14 | 1.40049505 | 0.362530278 | -1.949763493 | Down | 1.81E-06  | 3.30E-06   | AAEL005927-PA OS=Aedes aegypti GN=AAEL005927 PE=4 SV=1            |
| CCG025631.1 | 1527 | 47 | 14 | 1.3225786  | 0.320508104 | -2.044920726 | Down | 3.51E-07  | 6.59E-07   | AAEL005090-PA OS=Aedes aegypti GN=CYP325X2 PE=3 SV=2              |
| CCG014158.1 | 1548 | 48 | 14 | 1.33239487 | 0.316160126 | -2.075294375 | Down | 2.02E-07  | 3.82E-07   | AAEL001568-PA OS=Aedes aegypti GN=AAEL001568 PE=3 SV=1            |
| CCG000793.1 | 228  | 55 | 14 | 10.3655062 | 2.146560854 | -2.271691588 | Down | 3.68E-09  | 7.46E-09   | AAEL012353-PA OS=Aedes aegypti GN=CTL15 PE=4 SV=1                 |
| CCG006150.1 | 1867 | 57 | 14 | 1.31187728 | 0.262140265 | -2.323221888 | Down | 1.14E-09  | 2.34E-09   | AAEL007619-PA OS=Aedes aegypti GN=TOLL5A PE=4 SV=1                |
| CCG002262.1 | 489  | 60 | 14 | 5.27236007 | 1.00085046  | -2.39722247  | Down | 1.90E-10  | 4.03E-10   | AAEL009251-PA OS=Aedes aegypti GN=AAEL009251 PE=4 SV=1            |
| CCG018068.1 | 1038 | 63 | 14 | 2.60798967 | 0.471498916 | -2.467611798 | Down | 3.11E-11  | 6.76E-11   | AAEL004106-PA OS=Aedes aegypti GN=AAEL004106 PE=4 SV=1            |
| CCG008829.1 | 669  | 66 | 14 | 4.23916664 | 0.731563341 | -2.534725993 | Down | 4.95E-12  | 1.13E-11   | AAEL012952-PA OS=Aedes aegypti GN=AAEL012952 PE=1 SV=1            |



|             |      |     |    |            |             |              |      |          |          |                                                                                    |
|-------------|------|-----|----|------------|-------------|--------------|------|----------|----------|------------------------------------------------------------------------------------|
| CCG019060.1 | 702  | 68  | 14 | 4.16231048 | 0.697173611 | -2.577794715 | Down | 1.44E-12 | 3.48E-12 | AAEL001208-PA OS=Aedes aegypti GN=AAEL001208 PE=4 SV=1                             |
| CCG001590.1 | 1578 | 68  | 14 | 1.85167424 | 0.310149477 | -2.577794715 | Down | 1.44E-12 | 3.48E-12 | AAEL009237-PA OS=Aedes aegypti GN=AAEL009237 PE=3 SV=1                             |
| CCG008493.1 | 621  | 75  | 14 | 5.18958147 | 0.788109299 | -2.719150565 | Down | 1.77E-14 | 6.21E-14 | AGAP011667-PA (Fragment) OS=Anopheles gambiae GN=AGAP011667 PE=4 SV=4              |
| CCG018056.1 | 354  | 90  | 14 | 10.9245088 | 1.38253072  | -2.98218497  | Down | 1.05E-18 | 4.03E-18 | AAEL006695-PA OS=Aedes aegypti GN=AAEL006695 PE=4 SV=1                             |
| CCG001652.1 | 1323 | 100 | 14 | 3.24790133 | 0.369928855 | -3.134188064 | Down | 1.32E-21 | 5.23E-21 | AAEL007027-PA OS=Aedes aegypti GN=AAEL007027 PE=3 SV=1                             |
| CCG022077.1 | 780  | 102 | 14 | 5.61911914 | 0.62745625  | -3.162757216 | Down | 3.43E-22 | 1.36E-21 | Uncharacterized protein OS=Anopheles darlingi GN=AND_16384 PE=4 SV=1               |
| CCG007766.1 | 1986 | 103 | 14 | 2.22854112 | 0.246432968 | -3.176832401 | Down | 1.74E-22 | 6.95E-22 | AAEL013732-PA (Fragment) OS=Aedes aegypti GN=AAEL013732 PE=4 SV=1                  |
| CCG023980.1 | 1401 | 110 | 14 | 3.37378359 | 0.349333244 | -3.271691588 | Down | 1.49E-24 | 6.01E-24 | Transporter OS=Aedes aegypti GN=AAEL000298 PE=3 SV=1                               |
| CCG024004.1 | 633  | 123 | 14 | 8.34956928 | 0.773168839 | -3.432846379 | Down | 1.88E-28 | 7.86E-28 | Lysosomal acid phosphatase OS=Culex quinquefasciatus GN=CpipJ_CPIJ008635 PE=4 SV=1 |
| CCG015178.1 | 342  | 138 | 14 | 17.3386648 | 1.43104057  | -3.598856331 | Down | 5.07E-33 | 2.17E-32 | AAEL003048-PA OS=Aedes aegypti GN=AAEL003048 PE=4 SV=1                             |
| CCG015928.1 | 789  | 147 | 14 | 8.00576805 | 0.620298954 | -3.690004219 | Down | 8.56E-36 | 3.73E-35 | AAEL010639-PA OS=Aedes aegypti GN=AAEL010639 PE=4 SV=1                             |
| CCG005058.1 | 243  | 166 | 14 | 29.3538105 | 2.014057098 | -3.865371305 | Down | 1.04E-41 | 4.65E-41 | -                                                                                  |
| CCG024233.1 | 798  | 187 | 14 | 10.0693488 | 0.613303101 | -4.037226334 | Down | 2.47E-48 | 1.14E-47 | AAEL010639-PA OS=Aedes aegypti GN=AAEL010639 PE=4 SV=1                             |
| CCG010216.1 | 2568 | 225 | 14 | 3.76487161 | 0.190582506 | -4.304113065 | Down | 1.73E-60 | 8.36E-60 | AAEL011864-PA OS=Aedes aegypti GN=AAEL011864 PE=4 SV=1                             |
| CCG003871.1 | 908  | 249 | 14 | 11.7835506 | 0.539004267 | -4.450333806 | Down | 2.99E-68 | 1.48E-67 | Pyrroline-5-carboxylate reductase OS=Aedes aegypti PE=2 SV=1                       |

|             |      |       |    |            |             |              |      |           |            |                                                                             |
|-------------|------|-------|----|------------|-------------|--------------|------|-----------|------------|-----------------------------------------------------------------------------|
| CCG026910.1 | 1584 | 333   | 14 | 9.03341012 | 0.308974668 | -4.869710241 | Down | 8.78E-96  | 4.61E-95   | Glutamate dehydrogenase<br>OS=Aedes aegypti<br>GN=AAEL003757 PE=3 SV=1      |
| CCG028322.1 | 1218 | 374   | 14 | 13.1943192 | 0.401819273 | -5.037226334 | Down | 2.28E-109 | 1.22E-108  | AAEL000044-PA OS=Aedes<br>aegypti GN=CYP325Q1 PE=3<br>SV=1                  |
| CCG007954.1 | 1489 | 407   | 14 | 11.7452532 | 0.328687626 | -5.159216858 | Down | 2.35E-120 | 1.29E-119  | AAEL000729-PA OS=Aedes<br>aegypti GN=AAEL005729 PE=4<br>SV=1                |
| CCG010211.1 | 1239 | 1913  | 14 | 66.3447153 | 0.395008777 | -7.391953032 | Down | 0         | 0          | Vitelline envelope protein alpha<br>OS=Oncorhynchus mykiss PE=2<br>SV=1     |
| CCG008387.1 | 810  | 5349  | 14 | 283.759396 | 0.604217129 | -8.875385362 | Down | 0         | 0          | AAEL014369-PA OS=Aedes<br>aegypti GN=AAEL014369 PE=4<br>SV=1                |
| CCG001381.1 | 831  | 39144 | 14 | 2024.07616 | 0.588948104 | -11.74683544 | Down | 0         | 0          | -                                                                           |
| CCG004491.1 | 362  | 0     | 15 | 0.001      | 1.44854738  | 10.50039116  | Up   | 0.0001461 | 0.00023645 | -                                                                           |
| CCG018521.1 | 480  | 0     | 15 | 0.001      | 1.092446149 | 10.09334645  | Up   | 0.0001461 | 0.00023639 | AGAP013413-PA OS=Anopheles<br>gambiae GN=AgaP_AGAP013413<br>PE=4 SV=1       |
| CCG014603.1 | 504  | 0     | 15 | 0.001      | 1.040424904 | 10.02295712  | Up   | 0.0001461 | 0.00023644 | AAEL011252-PA OS=Aedes<br>aegypti GN=AAEL011252 PE=4<br>SV=1                |
| CCG021703.1 | 654  | 0     | 15 | 0.001      | 0.801795339 | 9.64709022   | Up   | 0.0001461 | 0.00023642 | AAEL010547-PA OS=Aedes<br>aegypti GN=AAEL010547 PE=4<br>SV=1                |
| CCG023512.1 | 756  | 0     | 15 | 0.001      | 0.693616603 | 9.437994622  | Up   | 0.0001461 | 0.00023641 | AAEL000465-PA OS=Aedes<br>aegypti GN=AAEL005465 PE=4<br>SV=1                |
| CCG028277.1 | 834  | 0     | 15 | 0.001      | 0.628745985 | 9.296333472  | Up   | 0.0001461 | 0.0002365  | AAEL000378-PA OS=Aedes<br>aegypti GN=AAEL006378 PE=3<br>SV=1                |
| CCG004308.1 | 951  | 0     | 15 | 0.001      | 0.551392378 | 9.106935515  | Up   | 0.0001461 | 0.00023652 | AAEL010140-PA OS=Aedes<br>aegypti GN=AAEL010140 PE=3<br>SV=1                |
| CCG011758.1 | 1188 | 0     | 15 | 0.001      | 0.441392383 | 8.785917925  | Up   | 0.0001461 | 0.00023649 | Odorant receptor 2 OS=Aedes<br>albopictus PE=2 SV=1                         |
| CCG027607.1 | 1902 | 0     | 15 | 0.001      | 0.275696189 | 8.106935515  | Up   | 0.0001461 | 0.00023647 | Threonine--tRNA ligase<br>OS=Wolbachia pipientis wAlbB<br>GN=thrS PE=3 SV=1 |
| CCG002187.1 | 300  | 34    | 15 | 4.86990326 | 1.747913839 | -1.478259042 | Down | 0.0005769 | 0.00090336 | -                                                                           |

|             |      |    |    |            |             |              |      |           |            |                                                                                                   |
|-------------|------|----|----|------------|-------------|--------------|------|-----------|------------|---------------------------------------------------------------------------------------------------|
| CCG027298.1 | 675  | 35 | 15 | 2.22806031 | 0.776850595 | -1.520079218 | Down | 0.0003622 | 0.00057348 | Putative uncharacterized protein<br>OS=Culex quinquefasciatus<br>GN=CpipJ_CPIJ002736 PE=4<br>SV=1 |
| CCG008149.1 | 453  | 36 | 15 | 3.41481335 | 1.157558834 | -1.560721202 | Down | 0.0002258 | 0.00036181 | AAEL000481-PA OS=Aedes<br>aegypti GN=AAEL006481 PE=4<br>SV=1                                      |
| CCG021867.1 | 548  | 42 | 15 | 3.29330083 | 0.956887138 | -1.783113623 | Down | 1.15E-05  | 2.01E-05   | -                                                                                                 |
| CCG022228.1 | 588  | 43 | 15 | 3.14234454 | 0.891792775 | -1.817060955 | Down | 6.89E-06  | 1.22E-05   | LD21171p OS=Drosophila<br>melanogaster PE=2 SV=1                                                  |
| CCG027456.1 | 432  | 45 | 15 | 4.47601402 | 1.213829055 | -1.882649297 | Down | 2.42E-06  | 4.36E-06   | ATPase 1120 OS=Culex<br>quinquefasciatus<br>GN=CpipJ_CPIJ009335 PE=4<br>SV=1                      |
| CCG023947.1 | 847  | 45 | 15 | 2.28292569 | 0.619095811 | -1.882649297 | Down | 2.42E-06  | 4.36E-06   | -                                                                                                 |
| CCG005919.1 | 1032 | 45 | 15 | 1.87368029 | 0.508114488 | -1.882649297 | Down | 2.42E-06  | 4.36E-06   | AAEL011623-PA OS=Aedes<br>aegypti GN=AAEL011623 PE=4<br>SV=1                                      |
| CCG010919.1 | 1113 | 51 | 15 | 1.96896358 | 0.471135806 | -2.063221543 | Down | 9.31E-08  | 1.79E-07   | AAEL000336-PA OS=Aedes<br>aegypti GN=AAEL000336 PE=4<br>SV=1                                      |
| CCG013838.1 | 1431 | 53 | 15 | 1.59147165 | 0.36643896  | -2.118716655 | Down | 3.04E-08  | 5.97E-08   | Putative uncharacterized protein<br>OS=Culex quinquefasciatus<br>GN=CpipJ_CPIJ001348 PE=4<br>SV=1 |
| CCG010740.1 | 744  | 57 | 15 | 3.29203612 | 0.704803967 | -2.223686215 | Down | 3.10E-09  | 6.32E-09   | AAEL013325-PA OS=Aedes<br>aegypti GN=AAEL013325 PE=4<br>SV=1                                      |
| CCG009366.1 | 710  | 60 | 15 | 3.63124518 | 0.738555143 | -2.297686796 | Down | 5.41E-10  | 1.13E-09   | -                                                                                                 |
| CCG023860.1 | 729  | 64 | 15 | 3.77237725 | 0.719306106 | -2.390796201 | Down | 5.04E-11  | 1.09E-10   | AAEL013632-PA OS=Aedes<br>aegypti GN=ABDA_AEDAE_b<br>PE=2 SV=2                                    |
| CCG027368.1 | 6264 | 65 | 15 | 0.44588645 | 0.083712349 | -2.413164014 | Down | 2.77E-11  | 6.03E-11   | Vitellogenin-C OS=Aedes aegypti<br>GN=Vg-C PE=4 SV=1                                              |
| CCG023579.1 | 948  | 73 | 15 | 3.30885087 | 0.553137291 | -2.580620759 | Down | 2.08E-13  | 5.97E-13   | AAEL011633-PA OS=Aedes<br>aegypti GN=AAEL011633 PE=4<br>SV=1                                      |
| CCG022667.1 | 1704 | 74 | 15 | 1.86605655 | 0.30773131  | -2.600249566 | Down | 1.12E-13  | 3.47E-13   | AAEL008532-PA (Fragment)<br>OS=Aedes aegypti<br>GN=AAEL008532 PE=4 SV=1                           |
| CCG000296.1 | 1314 | 82 | 15 | 2.68152073 | 0.399067086 | -2.748348205 | Down | 7.18E-16  | 2.62E-15   | AAEL001168-PA OS=Aedes<br>aegypti GN=AAEL001168 PE=4<br>SV=1                                      |
| CCG018916.1 | 859  | 82 | 15 | 4.10188386 | 0.610447208 | -2.748348205 | Down | 7.18E-16  | 2.62E-15   | -                                                                                                 |

|             |      |      |    |            |             |              |      |           |            |                                                                                          |
|-------------|------|------|----|------------|-------------|--------------|------|-----------|------------|------------------------------------------------------------------------------------------|
| CCG009809.1 | 447  | 82   | 15 | 7.88259114 | 1.173096536 | -2.748348205 | Down | 7.18E-16  | 2.62E-15   | AAEL005440-PA OS=Aedes aegypti GN=AAEL005440 PE=4 SV=1                                   |
| CCG015018.1 | 558  | 90   | 15 | 6.93060236 | 0.939738623 | -2.882649297 | Down | 4.12E-18  | 1.57E-17   | AAEL010660-PA OS=Aedes aegypti GN=AAEL010660 PE=3 SV=1                                   |
| CCG015833.1 | 2679 | 111  | 15 | 1.78038094 | 0.195735032 | -3.185212067 | Down | 3.52E-24  | 1.42E-23   | AAEL005810-PA OS=Aedes aegypti GN=AAEL005810 PE=4 SV=1                                   |
| CCG012853.1 | 1626 | 127  | 15 | 3.35618468 | 0.322493328 | -3.379480887 | Down | 6.12E-29  | 2.57E-28   | AAEL003426-PA (Fragment) OS=Aedes aegypti GN=AAEL003426 PE=4 SV=1                        |
| CCG010572.1 | 558  | 134  | 15 | 10.3188968 | 0.939738623 | -3.456885391 | Down | 4.73E-31  | 2.01E-30   | Putative uncharacterized protein OS=Culex quinquefasciatus GN=CpipJ_CPIJ002735 PE=4 SV=1 |
| CCG010860.2 | 1959 | 267  | 15 | 5.85651819 | 0.267674401 | -4.451492132 | Down | 4.34E-73  | 2.17E-72   | Hand domain-containing protein 1 OS=Culex quinquefasciatus GN=CpipJ_CPIJ015374 PE=4 SV=1 |
| CCG018066.1 | 1494 | 287  | 15 | 8.2545608  | 0.350986715 | -4.555703127 | Down | 1.34E-79  | 6.82E-79   | AAEL004114-PA OS=Aedes aegypti GN=AAEL004114 PE=4 SV=1                                   |
| CCG020462.1 | 1503 | 358  | 15 | 10.2349734 | 0.348884998 | -4.874611978 | Down | 6.42E-103 | 3.41E-102  | AAEL011445-PA OS=Aedes aegypti GN=AAEL011445 PE=4 SV=1                                   |
| CCG020755.1 | 1908 | 1483 | 15 | 33.3983839 | 0.27482922  | -6.925099083 | Down | 0         | 0          | F-box/in protein OS=Culex quinquefasciatus GN=CpipJ_CPIJ011367 PE=4 SV=1                 |
| CCG018745.1 | 291  | 0    | 16 | 0.001      | 1.922104565 | 10.90847111  | Up   | 8.05E-05  | 0.00013298 | AAEL001787-PA OS=Aedes aegypti GN=AAEL001787 PE=4 SV=1                                   |
| CCG019640.1 | 315  | 0    | 16 | 0.001      | 1.775658503 | 10.79413843  | Up   | 8.05E-05  | 0.00013301 | AAEL006670-PA OS=Aedes aegypti GN=AAEL006670 PE=4 SV=1                                   |
| CCG020221.1 | 345  | 0    | 16 | 0.001      | 1.621253416 | 10.6628939   | Up   | 8.05E-05  | 0.00013308 | -                                                                                        |
| CCG009949.1 | 381  | 0    | 16 | 0.001      | 1.468064116 | 10.51969926  | Up   | 8.05E-05  | 0.00013293 | AAEL000073-PA OS=Aedes aegypti GN=AAEL000073 PE=4 SV=1                                   |
| CCG023219.1 | 388  | 0    | 16 | 0.001      | 1.441578424 | 10.49343361  | Up   | 8.05E-05  | 0.00013302 | AAEL010576-PA OS=Aedes aegypti GN=AAEL010576 PE=4 SV=1                                   |
| CCG001247.1 | 390  | 0    | 16 | 0.001      | 1.434185714 | 10.48601614  | Up   | 8.05E-05  | 0.00013296 | -                                                                                        |
| CCG014442.1 | 507  | 0    | 16 | 0.001      | 1.10321978  | 10.10750451  | Up   | 8.05E-05  | 0.00013306 | AGAP004106-PA OS=Anopheles gambiae GN=AgaP_AGAP004106 PE=4 SV=5                          |

|             |      |    |    |            |             |              |      |           |            |                                                                                             |
|-------------|------|----|----|------------|-------------|--------------|------|-----------|------------|---------------------------------------------------------------------------------------------|
| CCG018342.1 | 513  | 0  | 16 | 0.001      | 1.090316624 | 10.09053143  | Up   | 8.05E-05  | 0.00013307 | -                                                                                           |
| CCG002251.1 | 576  | 0  | 16 | 0.001      | 0.971063244 | 9.923421449  | Up   | 8.05E-05  | 0.00013299 | AAEL004355-PA OS=Aedes aegypti GN=AAEL004355 PE=4 SV=1                                      |
| CCG012832.1 | 648  | 0  | 16 | 0.001      | 0.863167328 | 9.753496447  | Up   | 8.05E-05  | 0.00013294 | AAEL003547-PA OS=Aedes aegypti GN=AAEL003547 PE=4 SV=1                                      |
| CCG021779.1 | 668  | 0  | 16 | 0.001      | 0.837323995 | 9.709642158  | Up   | 8.05E-05  | 0.00013297 | -                                                                                           |
| CCG022897.2 | 688  | 0  | 16 | 0.001      | 0.812983181 | 9.667081695  | Up   | 8.05E-05  | 0.000133   | -                                                                                           |
| CCG028412.1 | 696  | 0  | 16 | 0.001      | 0.803638546 | 9.650402954  | Up   | 8.05E-05  | 0.00013307 | Putative uncharacterized protein OS=Culex quinquefasciatus GN=CpipJ_CPIJ000496 PE=4 SV=1    |
| CCG005480.2 | 819  | 0  | 16 | 0.001      | 0.682945578 | 9.415626809  | Up   | 8.05E-05  | 0.000133   | AAEL007279-PA OS=Aedes aegypti GN=AAEL007279 PE=3 SV=1                                      |
| CCG022299.1 | 994  | 0  | 16 | 0.001      | 0.56270868  | 9.136244409  | Up   | 8.05E-05  | 0.00013309 | Putative uncharacterized protein (Fragment) OS=Harpegnathos saltator GN=EAI_06049 PE=4 SV=1 |
| CCG022378.1 | 1116 | 0  | 16 | 0.001      | 0.501193932 | 8.969225138  | Up   | 8.05E-05  | 0.00013303 | AAEL008380-PA OS=Aedes aegypti GN=AAEL008380 PE=4 SV=1                                      |
| CCG000478.1 | 1134 | 0  | 16 | 0.001      | 0.493238473 | 8.946141525  | Up   | 8.05E-05  | 0.00013295 | AAEL000130-PA OS=Aedes aegypti GN=AAEL000130 PE=4 SV=1                                      |
| CCG003766.1 | 1254 | 0  | 16 | 0.001      | 0.446038619 | 8.801024817  | Up   | 8.05E-05  | 0.00013294 | AAEL001160-PA OS=Aedes aegypti GN=AAEL001160 PE=4 SV=1                                      |
| CCG005674.1 | 1344 | 0  | 16 | 0.001      | 0.416169962 | 8.701029027  | Up   | 8.05E-05  | 0.00013304 | -                                                                                           |
| CCG014381.1 | 1608 | 0  | 16 | 0.001      | 0.34784355  | 8.442294759  | Up   | 8.05E-05  | 0.00013305 | AAEL006075-PA OS=Aedes aegypti GN=CYP307B1_a PE=3 SV=1                                      |
| CCG004406.1 | 744  | 36 | 16 | 2.07918071 | 0.751790898 | -1.467611798 | Down | 0.0004247 | 0.00067042 | Putative uncharacterized protein (Fragment) OS=Camponotus floridanus GN=EAG_00524 PE=4 SV=1 |
| CCG014901.1 | 1497 | 36 | 16 | 1.03334031 | 0.373635557 | -1.467611798 | Down | 0.0004247 | 0.00067047 | AAEL012766-PA OS=Aedes aegypti GN=CYP325G2 PE=3 SV=1                                        |
| CCG023690.1 | 963  | 37 | 16 | 1.65096592 | 0.580822875 | -1.507140162 | Down | 0.0002676 | 0.00042707 | AAEL014518-PA OS=Aedes aegypti GN=AAEL014518 PE=4 SV=1                                      |
| CCG005358.1 | 576  | 38 | 16 | 2.83480888 | 0.971063244 | -1.54561431  | Down | 0.0001674 | 0.00026994 | AAEL010802-PA OS=Aedes aegypti GN=AAEL010802 PE=4 SV=1                                      |

|             |      |    |    |            |             |              |      |          |            |                                                                                                   |
|-------------|------|----|----|------------|-------------|--------------|------|----------|------------|---------------------------------------------------------------------------------------------------|
| CCG008828.1 | 1018 | 40 | 16 | 1.68839822 | 0.549442464 | -1.619614891 | Down | 6.43E-05 | 0.00010676 | Putative uncharacterized protein<br>OS=Culex quinquefasciatus<br>GN=CpipJ_CPIJ017929 PE=4<br>SV=1 |
| CCG012684.1 | 1596 | 40 | 16 | 1.0769357  | 0.350458915 | -1.619614891 | Down | 6.43E-05 | 0.00010675 | AAEL012356-PA (Fragment)<br>OS=Aedes aegypti GN=GPRSMS<br>PE=3 SV=2                               |
| CCG001989.1 | 1302 | 41 | 16 | 1.3531176  | 0.429594799 | -1.655238801 | Down | 3.94E-05 | 6.66E-05   | AAEL003209-PA OS=Aedes<br>aegypti GN=AAEL003209 PE=4<br>SV=1                                      |
| CCG014253.1 | 2556 | 43 | 16 | 0.72288677 | 0.218831154 | -1.723951551 | Down | 1.46E-05 | 2.53E-05   | AAEL008549-PA OS=Aedes<br>aegypti GN=AAEL008549 PE=4<br>SV=1                                      |
| CCG021470.1 | 1337 | 44 | 16 | 1.41411243 | 0.418348862 | -1.757118415 | Down | 8.80E-06 | 1.54E-05   | Uncharacterized protein<br>OS=Anopheles darlingi<br>GN=AND_11969 PE=4 SV=1                        |
| CCG024686.1 | 732  | 44 | 16 | 2.58288022 | 0.764115339 | -1.757118415 | Down | 8.80E-06 | 1.54E-05   | AAEL011575-PA OS=Aedes<br>aegypti GN=AAEL011575 PE=4<br>SV=1                                      |
| CCG003724.1 | 1254 | 49 | 16 | 1.67904067 | 0.446038619 | -1.91239664  | Down | 6.51E-07 | 1.21E-06   | AAEL007607-PA OS=Aedes<br>aegypti GN=CYP4D38 PE=3<br>SV=1                                         |
| CCG011890.1 | 621  | 50 | 16 | 3.45972098 | 0.900696342 | -1.941542986 | Down | 3.81E-07 | 7.14E-07   | AAEL000340-PA OS=Aedes<br>aegypti GN=AAEL000340 PE=3<br>SV=1                                      |
| CCG021220.1 | 816  | 52 | 16 | 2.7382674  | 0.685456407 | -1.998126514 | Down | 1.29E-07 | 2.47E-07   | Putative uncharacterized protein<br>OS=Tribolium castaneum<br>GN=TcasGA2_TC004860 PE=3<br>SV=1    |
| CCG011224.1 | 393  | 52 | 16 | 5.68556285 | 1.423237731 | -1.998126514 | Down | 1.29E-07 | 2.47E-07   | -                                                                                                 |
| CCG021602.1 | 186  | 56 | 16 | 12.9371244 | 3.007163593 | -2.105041718 | Down | 1.41E-08 | 2.80E-08   | AAEL009548-PA OS=Aedes<br>aegypti GN=AAEL009548 PE=4<br>SV=1                                      |
| CCG026953.1 | 735  | 68 | 16 | 3.97543123 | 0.760996501 | -2.385149637 | Down | 1.34E-11 | 2.96E-11   | AAEL005072-PA OS=Aedes<br>aegypti GN=AAEL005072 PE=4<br>SV=1                                      |
| CCG009992.1 | 1905 | 69 | 16 | 1.55638409 | 0.293612823 | -2.406211253 | Down | 7.35E-12 | 1.65E-11   | AAEL012949-PA (Fragment)<br>OS=Aedes aegypti<br>GN=AAEL012949 PE=4 SV=1                           |
| CCG002183.1 | 1506 | 72 | 16 | 2.05432994 | 0.371402675 | -2.467611798 | Down | 1.20E-12 | 2.93E-12   | AAEL007673-PA OS=Aedes<br>aegypti GN=AAEL007673 PE=3<br>SV=1                                      |
| CCG001553.1 | 1458 | 76 | 16 | 2.23984899 | 0.383629923 | -2.54561431  | Down | 1.04E-13 | 3.25E-13   | AAEL001902-PA OS=Aedes<br>aegypti GN=AAEL001902 PE=3<br>SV=1                                      |

|             |      |     |    |            |             |              |      |          |          |                                                                                          |
|-------------|------|-----|----|------------|-------------|--------------|------|----------|----------|------------------------------------------------------------------------------------------|
| CCG014783.1 | 519  | 82  | 16 | 6.78905248 | 1.077711808 | -2.655238801 | Down | 2.48E-15 | 8.97E-15 | AAEL009978-PA OS=Aedes aegypti GN=AAEL009978 PE=4 SV=1                                   |
| CCG005496.1 | 1452 | 88  | 16 | 2.60422634 | 0.385215171 | -2.757118415 | Down | 5.53E-17 | 2.09E-16 | AAEL008053-PA OS=Aedes aegypti GN=AAEL008053 PE=3 SV=1                                   |
| CCG003240.1 | 1908 | 93  | 16 | 2.09443675 | 0.293151168 | -2.836845607 | Down | 2.22E-18 | 8.51E-18 | AAEL010851-PA OS=Aedes aegypti GN=AAEL010851 PE=4 SV=1                                   |
| CCG008619.1 | 741  | 96  | 16 | 5.56692918 | 0.754834586 | -2.882649297 | Down | 3.17E-19 | 1.23E-18 | AGAP011666-PA (Fragment) OS=Anopheles gambiae GN=AGAP011666 PE=4 SV=2                    |
| CCG007376.1 | 985  | 104 | 16 | 4.53690599 | 0.567850181 | -2.998126514 | Down | 1.66E-21 | 6.55E-21 | AAEL011634-PA OS=Aedes aegypti GN=AAEL011634 PE=4 SV=1                                   |
| CCG009288.1 | 900  | 105 | 16 | 5.0131357  | 0.621480476 | -3.011932314 | Down | 8.54E-22 | 3.39E-21 | AAEL002673-PA OS=Aedes aegypti GN=AAEL002673 PE=4 SV=1                                   |
| CCG015759.1 | 1305 | 105 | 16 | 3.45733497 | 0.428607225 | -3.011932314 | Down | 8.54E-22 | 3.39E-21 | AAEL007016-PA OS=Aedes aegypti GN=AAEL007016 PE=3 SV=1                                   |
| CCG002341.1 | 2469 | 108 | 16 | 1.87959957 | 0.226542093 | -3.052574298 | Down | 1.16E-22 | 4.64E-22 | AAEL014202-PA OS=Aedes aegypti GN=AAEL014202 PE=4 SV=1                                   |
| CCG009684.1 | 609  | 109 | 16 | 7.69080636 | 0.918444053 | -3.065871121 | Down | 5.97E-23 | 2.39E-22 | AAEL001563-PA OS=Aedes aegypti GN=AAEL001563 PE=4 SV=1                                   |
| CCG003247.1 | 1911 | 110 | 16 | 2.47340178 | 0.292690962 | -3.07904651  | Down | 3.06E-23 | 1.23E-22 | AAEL013732-PA (Fragment) OS=Aedes aegypti GN=AAEL013732 PE=4 SV=1                        |
| CCG026968.1 | 1353 | 115 | 16 | 3.65226865 | 0.413401647 | -3.143176847 | Down | 1.07E-24 | 4.33E-24 | AAEL008726-PA OS=Aedes aegypti GN=AAEL008726 PE=4 SV=1                                   |
| CCG003446.1 | 468  | 117 | 16 | 10.7424337 | 1.195154761 | -3.168051516 | Down | 2.76E-25 | 1.13E-24 | -                                                                                        |
| CCG008135.1 | 747  | 153 | 16 | 8.80102998 | 0.748771658 | -3.555074639 | Down | 4.35E-36 | 1.90E-35 | Putative uncharacterized protein OS=Culex quinquefasciatus GN=CpipJ_CPIJ017322 PE=4 SV=1 |
| CCG014925.1 | 831  | 179 | 16 | 9.25581528 | 0.673083548 | -3.781502573 | Down | 4.10E-44 | 1.86E-43 | AAEL004082-PA OS=Aedes aegypti GN=AAEL004082 PE=3 SV=1                                   |
| CCG002894.1 | 1839 | 184 | 16 | 4.29931004 | 0.304150314 | -3.821248752 | Down | 1.13E-45 | 5.18E-45 | AAEL011809-PA OS=Aedes aegypti GN=AAEL011809 PE=3 SV=1                                   |
| CCG013257.1 | 669  | 188 | 16 | 12.075202  | 0.836072389 | -3.852275648 | Down | 6.35E-47 | 2.92E-46 | AAEL001233-PA OS=Aedes aegypti GN=CLIFE9 PE=3 SV=2                                       |
| CCG027022.1 | 543  | 238 | 16 | 18.83388   | 1.030078137 | -4.192504559 | Down | 9.07E-63 | 4.41E-62 | -                                                                                        |

|             |      |     |    |            |             |              |      |           |            |                                                                                |
|-------------|------|-----|----|------------|-------------|--------------|------|-----------|------------|--------------------------------------------------------------------------------|
| CCG020424.1 | 1239 | 337 | 16 | 11.6874904 | 0.451438602 | -4.694291577 | Down | 6.65E-95  | 3.49E-94   | AAEL012794-PA OS=Aedes aegypti GN=AAEL012794 PE=4 SV=1                         |
| CCG005485.1 | 1422 | 607 | 16 | 18.3422144 | 0.393342073 | -5.543239502 | Down | 6.62E-185 | 3.90E-184  | AAEL005004-PA OS=Aedes aegypti GN=AAEL005004 PE=4 SV=1                         |
| CCG004395.1 | 228  | 0   | 17 | 0.001      | 2.60653818  | 11.34791928  | Up   | 4.44E-05  | 7.47E-05   | -                                                                              |
| CCG007233.1 | 429  | 0   | 17 | 0.001      | 1.385293019 | 10.43597545  | Up   | 4.44E-05  | 7.48E-05   | -                                                                              |
| CCG004633.1 | 442  | 0   | 17 | 0.001      | 1.344549107 | 10.39290673  | Up   | 4.44E-05  | 7.47E-05   | Putative secreted protein OS=Aedes aegypti PE=2 SV=1                           |
| CCG016358.1 | 627  | 0   | 17 | 0.001      | 0.947832066 | 9.888487659  | Up   | 4.44E-05  | 7.48E-05   | AAEL004696-PA OS=Aedes aegypti GN=AAEL004696 PE=4 SV=1                         |
| CCG009755.1 | 664  | 0   | 17 | 0.001      | 0.895016122 | 9.80576986   | Up   | 4.44E-05  | 7.47E-05   | -                                                                              |
| CCG012375.1 | 737  | 0   | 17 | 0.001      | 0.806364593 | 9.655288482  | Up   | 4.44E-05  | 7.47E-05   | AAEL007959-PA OS=Aedes aegypti GN=AAEL007959 PE=4 SV=1                         |
| CCG020709.1 | 1017 | 0   | 17 | 0.001      | 0.584356642 | 9.190705328  | Up   | 4.44E-05  | 7.47E-05   | AAEL005443-PA (Fragment) OS=Aedes aegypti GN=AAEL005443 PE=4 SV=1              |
| CCG015029.1 | 1044 | 0   | 17 | 0.001      | 0.56924397  | 9.152903295  | Up   | 4.44E-05  | 7.47E-05   | AAEL008380-PA OS=Aedes aegypti GN=AAEL008380 PE=4 SV=1                         |
| CCG001620.1 | 1065 | 0   | 17 | 0.001      | 0.558019441 | 9.124171576  | Up   | 4.44E-05  | 7.47E-05   | AAEL004590-PA OS=Aedes aegypti GN=AAEL004590 PE=4 SV=1                         |
| CCG017233.1 | 1170 | 0   | 17 | 0.001      | 0.507940774 | 8.988516477  | Up   | 4.44E-05  | 7.47E-05   | AAEL015312-PA OS=Aedes aegypti GN=AAEL015312 PE=3 SV=1                         |
| CCG009838.1 | 1179 | 0   | 17 | 0.001      | 0.504063363 | 8.977461288  | Up   | 4.44E-05  | 7.47E-05   | PA D-oxidoreductase OS=Culex quinquefasciatus GN=CpipJ_CPIJ016820 PE=4 SV=1    |
| CCG022990.1 | 1267 | 0   | 17 | 0.001      | 0.469053437 | 8.873608482  | Up   | 4.44E-05  | 7.47E-05   | RNA nuclease-reverse transcriptase OS=Bombyx mori PE=4 SV=1                    |
| CCG010527.1 | 1308 | 0   | 17 | 0.001      | 0.454350692 | 8.827662466  | Up   | 4.44E-05  | 7.48E-05   | AGAP000437-PA OS=Anopheles gambiae GN=AgaP_AGAP000437 PE=4 SV=5                |
| CCG006770.1 | 2919 | 0   | 17 | 0.001      | 0.203593938 | 7.669550796  | Up   | 4.44E-05  | 7.47E-05   | AAEL005942-PA OS=Aedes aegypti GN=AAEL005942 PE=4 SV=1                         |
| CCG027149.1 | 1134 | 38  | 17 | 1.43990292 | 0.524065878 | -1.458151468 | Down | 0.0003128 | 0.00049712 | Calvar serum protein 2 OS=Culex quinquefasciatus GN=CpipJ_CPIJ009032 PE=4 SV=1 |



|             |      |     |    |            |             |              |      |           |            |                                                                   |
|-------------|------|-----|----|------------|-------------|--------------|------|-----------|------------|-------------------------------------------------------------------|
| CCG000116.1 | 1356 | 38  | 17 | 1.2041666  | 0.438267482 | -1.458151468 | Down | 0.0003128 | 0.00049709 | AAEL006886-PA OS=Aedes aegypti GN=AAEL006886 PE=4 SV=1            |
| CCG012645.1 | 843  | 40  | 17 | 2.03889607 | 0.70497118  | -1.53215205  | Down | 0.0001241 | 0.00020171 | AAEL013324-PA OS=Aedes aegypti GN=AAEL013324 PE=4 SV=1            |
| CCG019643.1 | 1521 | 41  | 17 | 1.15829002 | 0.390723672 | -1.56777596  | Down | 7.74E-05  | 0.00012806 | AAEL009780-PA OS=Aedes aegypti GN=AAEL009780 PE=3 SV=1            |
| CCG013704.1 | 798  | 41  | 17 | 2.20771819 | 0.744725194 | -1.56777596  | Down | 7.74E-05  | 0.00012806 | AAEL001809-PA OS=Aedes aegypti GN=AAEL001809 PE=4 SV=1            |
| CCG005688.1 | 2316 | 41  | 17 | 0.76069047 | 0.256602204 | -1.56777596  | Down | 7.74E-05  | 0.00012805 | AAEL002066-PA OS=Aedes aegypti GN=AAEL002066 PE=4 SV=1            |
| CCG018402.1 | 2469 | 42  | 17 | 0.73095539 | 0.240700974 | -1.602541378 | Down | 4.80E-05  | 8.06E-05   | AAEL002338-PA OS=Aedes aegypti GN=AAEL002338 PE=4 SV=1            |
| CCG027164.1 | 1290 | 43  | 17 | 1.43232449 | 0.460690469 | -1.63648871  | Down | 2.96E-05  | 5.03E-05   | -                                                                 |
| CCG008428.1 | 525  | 47  | 17 | 3.84681434 | 1.131982295 | -1.764812807 | Down | 4.03E-06  | 7.22E-06   | AAEL013104-PA OS=Aedes aegypti GN=AAEL013104 PE=4 SV=1            |
| CCG006161.1 | 593  | 53  | 17 | 3.84046532 | 1.002176569 | -1.938144409 | Down | 1.75E-07  | 3.33E-07   | -                                                                 |
| CCG007370.1 | 3549 | 55  | 17 | 0.66591586 | 0.167453002 | -1.991583668 | Down | 5.96E-08  | 1.16E-07   | AAEL007976-PA OS=Aedes aegypti GN=AAEL007976 PE=4 SV=1            |
| CCG017262.1 | 342  | 56  | 17 | 7.03597994 | 1.73769212  | -2.017578877 | Down | 3.45E-08  | 6.75E-08   | AAEL008028-PA OS=Aedes aegypti GN=AAEL008028 PE=4 SV=1            |
| CCG009275.1 | 863  | 72  | 17 | 3.58496048 | 0.688633494 | -2.380148956 | Down | 3.55E-12  | 8.26E-12   | AAEL015464-PA OS=Aedes aegypti GN=AAEL015464 PE=3 SV=1            |
| CCG012013.1 | 1455 | 87  | 17 | 2.56932434 | 0.40844722  | -2.653167451 | Down | 3.60E-16  | 1.35E-15   | AAEL011160-PA OS=Aedes aegypti GN=AAEL011160 PE=4 SV=1            |
| CCG003421.1 | 900  | 106 | 17 | 5.06087985 | 0.660323006 | -2.938144409 | Down | 1.79E-21  | 7.05E-21   | AAEL003279-PA OS=Aedes aegypti GN=AAEL003279 PE=3 SV=1            |
| CCG007496.1 | 1782 | 112 | 17 | 2.70067917 | 0.333496468 | -3.017578877 | Down | 3.41E-23  | 1.37E-22   | AAEL015391-PA OS=Aedes aegypti GN=AAEL015391 PE=4 SV=1            |
| CCG017844.1 | 1307 | 114 | 17 | 3.74793401 | 0.454698321 | -3.043113969 | Down | 9.02E-24  | 3.63E-23   | AAEL002869-PA OS=Aedes aegypti GN=AAEL002869 PE=4 SV=1            |
| CCG024917.1 | 3018 | 117 | 17 | 1.6658247  | 0.196915409 | -3.080588675 | Down | 1.22E-24  | 4.94E-24   | AAEL006760-PA (Fragment) OS=Aedes aegypti GN=AAEL006760 PE=4 SV=1 |
| CCG019175.1 | 499  | 118 | 17 | 10.1611797 | 1.190963337 | -3.092867004 | Down | 6.25E-25  | 2.54E-24   | AAEL002591-PA OS=Aedes aegypti GN=AAEL002591 PE=4 SV=1            |

|             |      |      |    |            |             |              |      |           |           |                                                                                          |
|-------------|------|------|----|------------|-------------|--------------|------|-----------|-----------|------------------------------------------------------------------------------------------|
| CCG006301.1 | 1203 | 175  | 17 | 6.25079265 | 0.494007236 | -3.661435067 | Down | 4.53E-42  | 2.04E-41  | AAEL004711-PA OS=Aedes aegypti GN=AAEL004711 PE=4 SV=1                                   |
| CCG005225.1 | 519  | 194  | 17 | 16.0619047 | 1.145068796 | -3.810136797 | Down | 5.76E-48  | 2.66E-47  | AAEL009978-PA OS=Aedes aegypti GN=AAEL009978 PE=4 SV=1                                   |
| CCG015168.1 | 1029 | 218  | 17 | 9.10340345 | 0.577541987 | -3.97840828  | Down | 1.67E-55  | 7.94E-55  | AAEL003411-PA OS=Aedes aegypti GN=AAEL003411 PE=4 SV=1                                   |
| CCG024377.1 | 600  | 278  | 17 | 19.9093104 | 0.990484509 | -4.329165028 | Down | 1.13E-74  | 5.67E-74  | AAEL009112-PA OS=Aedes aegypti GN=AAEL009112 PE=4 SV=1                                   |
| CCG000946.1 | 771  | 330  | 17 | 18.3917152 | 0.770805065 | -4.576546169 | Down | 1.49E-91  | 7.75E-91  | AAEL008152-PA OS=Aedes aegypti GN=AAEL008152 PE=4 SV=1                                   |
| CCG011695.1 | 954  | 405  | 17 | 18.2418685 | 0.622946232 | -4.872002053 | Down | 3.39E-116 | 1.84E-115 | AAEL013222-PA OS=Aedes aegypti GN=AAEL013222 PE=4 SV=1                                   |
| CCG015449.1 | 1491 | 425  | 17 | 12.2482476 | 0.398585315 | -4.941542986 | Down | 8.20E-123 | 4.51E-122 | AAEL012701-PA OS=Aedes aegypti GN=CYP325T2 PE=3 SV=1                                     |
| CCG015583.1 | 2148 | 538  | 17 | 10.7624382 | 0.27667165  | -5.281686317 | Down | 1.89E-160 | 1.09E-159 | AAEL006245-PA (Fragment) OS=Aedes aegypti GN=AAEL006245 PE=4 SV=1                        |
| CCG000282.1 | 756  | 2184 | 17 | 124.134789 | 0.786098816 | -7.302981096 | Down | 0         | 0         | AAEL011797-PA OS=Aedes aegypti GN=AAEL011797 PE=4 SV=1                                   |
| CCG007816.1 | 711  | 4427 | 17 | 267.548544 | 0.835851906 | -8.322337613 | Down | 0         | 0         | AAEL009577-PA OS=Aedes aegypti GN=AAEL009577 PE=4 SV=1                                   |
| CCG002351.1 | 306  | 6399 | 17 | 898.57298  | 1.942126487 | -8.853854706 | Down | 0         | 0         | Putative uncharacterized protein OS=Culex quinquefasciatus GN=CpipJ_CPIJ015149 PE=4 SV=1 |
| CCG004740.1 | 282  | 0    | 18 | 0.001      | 2.231379368 | 11.1237201   | Up   | 2.45E-05  | 4.20E-05  | AAEL000685-PA OS=Aedes aegypti GN=AAEL000685 PE=4 SV=1                                   |
| CCG004140.1 | 528  | 0    | 18 | 0.001      | 1.191759435 | 10.21887733  | Up   | 2.45E-05  | 4.20E-05  | -                                                                                        |
| CCG027637.1 | 546  | 0    | 18 | 0.001      | 1.152470663 | 10.17051431  | Up   | 2.45E-05  | 4.20E-05  | AAEL011839-PA OS=Aedes aegypti GN=AAEL011839 PE=4 SV=1                                   |
| CCG004677.1 | 690  | 0    | 18 | 0.001      | 0.911955046 | 9.8328189    | Up   | 2.45E-05  | 4.20E-05  | AAEL001814-PA OS=Aedes aegypti GN=AAEL001814 PE=4 SV=1                                   |
| CCG015311.1 | 731  | 0    | 18 | 0.001      | 0.860805721 | 9.749543856  | Up   | 2.45E-05  | 4.20E-05  | Hypothetical conserved protein OS=Aedes aegypti PE=2 SV=1                                |
| CCG001873.1 | 885  | 0    | 18 | 0.001      | 0.711015799 | 9.473737807  | Up   | 2.45E-05  | 4.20E-05  | AAEL008197-PA OS=Aedes aegypti GN=AAEL008197 PE=3 SV=1                                   |

|             |      |    |    |            |             |              |      |           |            |                                                                                           |
|-------------|------|----|----|------------|-------------|--------------|------|-----------|------------|-------------------------------------------------------------------------------------------|
| CCG015533.1 | 909  | 0  | 18 | 0.001      | 0.692243104 | 9.435134967  | Up   | 2.45E-05  | 4.20E-05   | AAEL012550-PA OS=Aedes aegypti GN=AAEL012550 PE=4 SV=1                                    |
| CCG003452.1 | 933  | 0  | 18 | 0.001      | 0.674436208 | 9.397538181  | Up   | 2.45E-05  | 4.20E-05   | AAEL000224-PA OS=Aedes aegypti GN=AAEL000224 PE=3 SV=1                                    |
| CCG006009.1 | 1170 | 0  | 18 | 0.001      | 0.537819643 | 9.070978637  | Up   | 2.45E-05  | 4.20E-05   | 3-demethylubiquinone-9 3-methyltransferase OS=Wolbachia pipientis wAlbB GN=ubiG PE=3 SV=1 |
| CCG002815.1 | 1216 | 0  | 18 | 0.001      | 0.517474492 | 9.015343938  | Up   | 2.45E-05  | 4.20E-05   | -                                                                                         |
| CCG016924.1 | 1494 | 0  | 18 | 0.001      | 0.421184057 | 8.718307019  | Up   | 2.45E-05  | 4.20E-05   | AAEL002671-PA OS=Aedes aegypti GN=AAEL002671 PE=4 SV=1                                    |
| CCG023831.1 | 1686 | 0  | 18 | 0.001      | 0.373220037 | 8.543882631  | Up   | 2.45E-05  | 4.20E-05   | AAEL003201-PA (Fragment) OS=Aedes aegypti GN=AAEL003201 PE=4 SV=1                         |
| CCG011776.1 | 2614 | 0  | 18 | 0.001      | 0.24072264  | 7.911228026  | Up   | 2.45E-05  | 4.20E-05   | RNase H and integrase-like protein (Fragment) OS=Bombyx mori GN=P-1 PE=4 SV=1             |
| CCG024250.1 | 342  | 41 | 18 | 5.15134245 | 1.839909304 | -1.485313799 | Down | 0.0001461 | 0.00023641 | AAEL003755-PA OS=Aedes aegypti GN=AAEL003755 PE=3 SV=1                                    |
| CCG014953.1 | 1116 | 43 | 18 | 1.6556439  | 0.563843174 | -1.554026549 | Down | 5.76E-05  | 9.59E-05   | AAEL009865-PA OS=Aedes aegypti GN=AAEL009865 PE=4 SV=1                                    |
| CCG010552.1 | 729  | 43 | 18 | 2.53456596 | 0.863167328 | -1.554026549 | Down | 5.76E-05  | 9.59E-05   | AGAP010049-PA (Fragment) OS=Anopheles gambiae GN=AGAP010049 PE=4 SV=4                     |
| CCG010104.1 | 468  | 45 | 18 | 4.13170525 | 1.344549107 | -1.619614891 | Down | 2.22E-05  | 3.81E-05   | -                                                                                         |
| CCG021530.1 | 921  | 46 | 18 | 2.14615395 | 0.68322365  | -1.651323751 | Down | 1.36E-05  | 2.37E-05   | AAEL012170-PA OS=Aedes aegypti GN=AAEL012170 PE=4 SV=1                                    |
| CCG018165.1 | 408  | 48 | 18 | 5.0552629  | 1.542276916 | -1.712724295 | Down | 5.07E-06  | 9.02E-06   | Uncharacterized protein OS=Anopheles darlingi GN=AND_07352 PE=4 SV=1                      |
| CCG017544.1 | 507  | 49 | 18 | 4.15289348 | 1.241122252 | -1.742471639 | Down | 3.07E-06  | 5.52E-06   | AAEL014490-PA OS=Aedes aegypti GN=AAEL014490 PE=4 SV=1                                    |
| CCG010306.1 | 2208 | 52 | 18 | 1.01196839 | 0.284985952 | -1.828201513 | Down | 6.63E-07  | 1.23E-06   | AAEL002676-PA OS=Aedes aegypti GN=AAEL002676 PE=4 SV=1                                    |
| CCG007103.1 | 788  | 54 | 18 | 2.94462648 | 0.798539317 | -1.882649297 | Down | 2.33E-07  | 4.41E-07   | -                                                                                         |

|             |      |     |    |            |             |              |      |          |          |                                                                                          |
|-------------|------|-----|----|------------|-------------|--------------|------|----------|----------|------------------------------------------------------------------------------------------|
| CCG014766.1 | 897  | 54  | 18 | 2.58680677 | 0.701503882 | -1.882649297 | Down | 2.33E-07 | 4.41E-07 | AAEL004569-PA OS=Aedes aegypti GN=AAEL004569 PE=4 SV=1                                   |
| CCG013106.1 | 216  | 55  | 18 | 10.9413676 | 2.913189731 | -1.909121508 | Down | 1.37E-07 | 2.62E-07 | AAEL002011-PA OS=Aedes aegypti GN=AAEL002011 PE=4 SV=1                                   |
| CCG028507.1 | 879  | 58  | 18 | 2.8353181  | 0.715869149 | -1.98574279  | Down | 2.75E-08 | 5.40E-08 | Pv-like protein OS=Culex quinquefasciatus GN=CpipJ_CPIJ011811 PE=4 SV=1                  |
| CCG021114.2 | 1453 | 64  | 18 | 1.89267929 | 0.433068811 | -2.127761795 | Down | 9.96E-10 | 2.05E-09 | Peptidase OS=Culex quinquefasciatus GN=CpipJ_CPIJ014636 PE=4 SV=1                        |
| CCG028474.1 | 1440 | 67  | 18 | 1.99928626 | 0.43697846  | -2.193850985 | Down | 1.81E-10 | 3.84E-10 | Putative uncharacterized protein OS=Culex quinquefasciatus GN=CpipJ_CPIJ018073 PE=4 SV=1 |
| CCG006885.1 | 396  | 75  | 18 | 8.13820731 | 1.589012581 | -2.356580485 | Down | 1.71E-12 | 4.10E-12 | AAEL001463-PA OS=Aedes aegypti GN=AAEL001463 PE=4 SV=1                                   |
| CCG021344.1 | 306  | 84  | 18 | 11.7956134 | 2.056369222 | -2.520079218 | Down | 7.50E-15 | 2.69E-14 | Uncharacterized protein OS=Anopheles darlingi GN=AND_25223 PE=4 SV=1                     |
| CCG019322.1 | 432  | 90  | 18 | 8.95202804 | 1.456594866 | -2.619614891 | Down | 1.83E-16 | 6.88E-16 | AAEL014559-PA OS=Aedes aegypti GN=AAEL014559 PE=4 SV=1                                   |
| CCG017170.1 | 1512 | 95  | 18 | 2.69981798 | 0.416169962 | -2.697617403 | Down | 7.92E-18 | 3.02E-17 | AAEL000912-PA OS=Aedes aegypti GN=AAEL000912 PE=4 SV=1                                   |
| CCG014828.1 | 261  | 111 | 18 | 18.2744848 | 2.410915639 | -2.922177661 | Down | 2.65E-22 | 1.06E-21 | AAEL009481-PA OS=Aedes aegypti GN=AAEL009481 PE=4 SV=1                                   |
| CCG012841.1 | 1035 | 122 | 18 | 5.06503152 | 0.607970031 | -3.058499132 | Down | 1.85E-25 | 7.55E-25 | AAEL013276-PA OS=Aedes aegypti GN=AAEL013276 PE=4 SV=1                                   |
| CCG007131.1 | 2292 | 126 | 18 | 2.36221054 | 0.274541441 | -3.105041718 | Down | 1.28E-26 | 5.26E-26 | AAEL012309-PA OS=Aedes aegypti GN=AAEL012309 PE=4 SV=1                                   |
| CCG011561.1 | 1725 | 133 | 18 | 3.31302881 | 0.364782018 | -3.18304423  | Down | 1.14E-28 | 4.78E-28 | AAEL004766-PA OS=Aedes aegypti GN=AAEL004766 PE=4 SV=1                                   |
| CCG008132.1 | 1482 | 152 | 18 | 4.40715227 | 0.424594455 | -3.375689308 | Down | 2.57E-34 | 1.11E-33 | AAEL004213-PA OS=Aedes aegypti GN=AAEL004213 PE=4 SV=1                                   |
| CCG015784.1 | 1569 | 180 | 18 | 4.92960627 | 0.401050976 | -3.619614891 | Down | 7.92E-43 | 3.57E-42 | AAEL007684-PA OS=Aedes aegypti GN=AAEL007684 PE=4 SV=1                                   |

|             |      |       |    |            |             |              |      |           |           |                                                                                                   |
|-------------|------|-------|----|------------|-------------|--------------|------|-----------|-----------|---------------------------------------------------------------------------------------------------|
| CCG020031.1 | 1146 | 246   | 18 | 9.22386973 | 0.549082881 | -4.0702763   | Down | 1.73E-63  | 8.42E-63  | Protoninament ribbon protein<br>OS=Culex quinquefasciatus<br>GN=CpipJ_CPIJ001618 PE=4<br>SV=1     |
| CCG000346.1 | 1248 | 357   | 18 | 12.2918231 | 0.504205915 | -4.607542059 | Down | 2.50E-99  | 1.32E-98  | AAEL005969-PA OS=Aedes<br>aegypti GN=AAEL005969 PE=4<br>SV=1                                      |
| CCG000947.1 | 771  | 458   | 18 | 25.5254714 | 0.816146539 | -4.966965583 | Down | 1.35E-132 | 7.51E-132 | AAEL008159-PA OS=Aedes<br>aegypti GN=AAEL008159 PE=4<br>SV=1                                      |
| CCG026890.1 | 1614 | 500   | 18 | 13.3115659 | 0.389869258 | -5.093546079 | Down | 1.51E-146 | 8.52E-146 | AAEL005533-PA (Fragment)<br>OS=Aedes aegypti<br>GN=AAEL005533 PE=4 SV=1                           |
| CCG018766.1 | 1797 | 935   | 18 | 22.3576527 | 0.350166378 | -5.99658435  | Down | 3.53E-293 | 2.21E-292 | AGAP005519-PA OS=Anopheles<br>gambiae GN=AGAP005519 PE=4<br>SV=3                                  |
| CCG000708.1 | 981  | 1963  | 18 | 85.9832712 | 0.641436271 | -7.066606252 | Down | 0         | 0         | AAEL000432-PA OS=Aedes<br>aegypti GN=AAEL000432 PE=3<br>SV=1                                      |
| CCG015395.1 | 624  | 11910 | 18 | 820.143492 | 1.00841183  | -9.667647587 | Down | 0         | 0         | AAEL004292-PA OS=Aedes<br>aegypti GN=AAEL004292 PE=4<br>SV=1                                      |
| CCG014096.1 | 273  | 0     | 19 | 0.001      | 2.432993622 | 11.24851682  | Up   | 1.35E-05  | 2.35E-05  | AAEL004628-PA OS=Aedes<br>aegypti GN=AAEL004628 PE=4<br>SV=1                                      |
| CCG017730.1 | 456  | 0     | 19 | 0.001      | 1.456594866 | 10.50838395  | Up   | 1.35E-05  | 2.35E-05  | AAEL009598-PA OS=Aedes<br>aegypti GN=AAEL009598 PE=4<br>SV=1                                      |
| CCG004069.1 | 573  | 0     | 19 | 0.001      | 1.159174972 | 10.17888263  | Up   | 1.35E-05  | 2.35E-05  | AAEL012461-PA OS=Aedes<br>aegypti GN=AAEL012461 PE=4<br>SV=1                                      |
| CCG017058.1 | 840  | 0     | 19 | 0.001      | 0.790722927 | 9.627028446  | Up   | 1.35E-05  | 2.35E-05  | AAEL008797-PA OS=Aedes<br>aegypti GN=AAEL008797 PE=4<br>SV=1                                      |
| CCG010721.1 | 978  | 0     | 19 | 0.001      | 0.679148526 | 9.407583309  | Up   | 1.35E-05  | 2.35E-05  | AAEL009463-PA (Fragment)<br>OS=Aedes aegypti<br>GN=AAEL009463 PE=4 SV=1                           |
| CCG003303.1 | 1032 | 0     | 19 | 0.001      | 0.643611685 | 9.330046708  | Up   | 1.35E-05  | 2.35E-05  | AAEL009977-PA OS=Aedes<br>aegypti GN=AAEL009977 PE=4<br>SV=1                                      |
| CCG008512.1 | 1215 | 0     | 19 | 0.001      | 0.546672641 | 9.094533365  | Up   | 1.35E-05  | 2.35E-05  | Putative uncharacterized protein<br>OS=Culex quinquefasciatus<br>GN=CpipJ_CPIJ014988 PE=3<br>SV=1 |

|             |      |    |    |            |             |              |      |           |            |                                                                                                   |
|-------------|------|----|----|------------|-------------|--------------|------|-----------|------------|---------------------------------------------------------------------------------------------------|
| CCG001859.1 | 1434 | 0  | 19 | 0.001      | 0.463184978 | 8.855444655  | Up   | 1.35E-05  | 2.35E-05   | Putative uncharacterized protein<br>OS=Culex quinquefasciatus<br>GN=CpipJ_CPIJ017585 PE=4<br>SV=1 |
| CCG010597.1 | 1438 | 39 | 19 | 1.16538223 | 0.461896564 | -1.335161502 | Down | 0.0006364 | 0.00098882 | AAEL0008020-FA OS=Aedes<br>aegypti GN=AAEL008626 PE=4<br>SV=1                                     |
| CCG024758.1 | 1725 | 39 | 19 | 0.97148965 | 0.385047686 | -1.335161502 | Down | 0.0006364 | 0.00098888 | AAEL0005255-FA OS=Aedes<br>aegypti GN=AAEL003233 PE=3<br>SV=1                                     |
| CCG002128.1 | 1096 | 40 | 19 | 1.56823849 | 0.606028521 | -1.371687378 | Down | 0.0004126 | 0.00065184 | Putative uncharacterized protein<br>(Fragment) OS=Solenopsis invicta<br>GN=SINV_11683 PE=4 SV=1   |
| CCG027899.1 | 732  | 41 | 19 | 2.40677475 | 0.907386965 | -1.407311287 | Down | 0.0002656 | 0.00042403 | AAEL0005840-FA OS=Aedes<br>aegypti GN=AAEL005840 PE=4<br>SV=1                                     |
| CCG022498.1 | 648  | 41 | 19 | 2.71876407 | 1.025011202 | -1.407311287 | Down | 0.0002656 | 0.00042406 | AAEL0009546-FA OS=Aedes<br>aegypti GN=AAEL009548 PE=4<br>SV=1                                     |
| CCG019750.1 | 318  | 42 | 19 | 5.67524797 | 2.088702071 | -1.442076706 | Down | 0.0001699 | 0.00027381 | AAEL0009314-FA OS=Aedes<br>aegypti GN=AAEL009314 PE=4<br>SV=1                                     |
| CCG012309.2 | 1689 | 44 | 19 | 1.11940102 | 0.393254742 | -1.509190901 | Down | 6.82E-05  | 0.00011315 | GATA transcription factor GATAd<br>OS=Aedes aegypti PE=2 SV=1                                     |
| CCG012525.1 | 528  | 45 | 19 | 3.66219329 | 1.257968293 | -1.541612379 | Down | 4.28E-05  | 7.21E-05   | -                                                                                                 |
| CCG000145.1 | 1239 | 47 | 19 | 1.63000607 | 0.53608334  | -1.604348134 | Down | 1.66E-05  | 2.86E-05   | AAEL0009966-FA OS=Aedes<br>aegypti GN=AAEL009966 PE=4<br>SV=1                                     |
| CCG001314.1 | 1548 | 48 | 19 | 1.33239487 | 0.429074457 | -1.634721783 | Down | 1.02E-05  | 1.79E-05   | AAEL000127-FA OS=Aedes<br>aegypti GN=AAEL000127 PE=4<br>SV=1                                      |
| CCG021910.1 | 1512 | 48 | 19 | 1.36411856 | 0.439290515 | -1.634721783 | Down | 1.02E-05  | 1.79E-05   | Putative uncharacterized protein<br>OS=Culex quinquefasciatus<br>GN=CpipJ_CPIJ002477 PE=4<br>SV=1 |
| CCG011892.1 | 984  | 55 | 19 | 2.40176362 | 0.675007377 | -1.831118996 | Down | 3.05E-07  | 5.72E-07   | AAEL000336-FA OS=Aedes<br>aegypti GN=AAEL000336 PE=4<br>SV=1                                      |
| CCG010724.2 | 1939 | 57 | 19 | 1.26316394 | 0.342551449 | -1.882649297 | Down | 1.07E-07  | 2.06E-07   | Protein translocase subunit secA<br>OS=Harpegnathos saltator<br>GN=EAI_00772 PE=4 SV=1            |
| CCG022426.1 | 495  | 58 | 19 | 5.03483759 | 1.341832846 | -1.907740278 | Down | 6.33E-08  | 1.23E-07   | AAEL0006630-FA OS=Aedes<br>aegypti GN=AAEL000630 PE=4<br>SV=1                                     |
| CCG008044.1 | 3204 | 59 | 19 | 0.7912654  | 0.207305636 | -1.932402332 | Down | 3.72E-08  | 7.26E-08   | -                                                                                                 |

|             |      |     |    |            |             |              |      |          |          |                                                                                                                  |
|-------------|------|-----|----|------------|-------------|--------------|------|----------|----------|------------------------------------------------------------------------------------------------------------------|
| CCG024023.1 | 858  | 60  | 19 | 3.00487655 | 0.774134334 | -1.956649878 | Down | 2.18E-08 | 4.29E-08 | AGAP000352-PA OS=Anopheles gambiae GN=AgaP_AGAP000352 PE=4 SV=2                                                  |
| CCG006546.1 | 582  | 60  | 19 | 4.42986955 | 1.141249585 | -1.956649878 | Down | 2.18E-08 | 4.29E-08 | AAEL010664-PA OS=Aedes aegypti GN=AAEL010664 PE=3 SV=1                                                           |
| CCG007501.1 | 2357 | 62  | 19 | 1.13030273 | 0.281801977 | -2.003955593 | Down | 7.38E-09 | 1.48E-08 | Ankyrin repeat protein OS=Neosartorya fumigata (strain CEA10 / CBS 144.89 / FGSC A1163) GN=AFUB_080240 PE=4 SV=1 |
| CCG021589.1 | 1500 | 64  | 19 | 1.83337534 | 0.442804839 | -2.049759283 | Down | 2.47E-09 | 5.03E-09 | AAEL008933-PA OS=Aedes aegypti GN=AAEL008933 PE=4 SV=1                                                           |
| CCG023587.1 | 789  | 66  | 19 | 3.59442647 | 0.841834295 | -2.094153402 | Down | 8.13E-10 | 1.68E-09 | AAEL009032-PA OS=Aedes aegypti GN=AAEL009032 PE=4 SV=1                                                           |
| CCG013492.1 | 543  | 69  | 19 | 5.46024252 | 1.223217788 | -2.15828374  | Down | 1.51E-10 | 3.20E-10 | AAEL010347-PA OS=Aedes aegypti GN=AAEL010347 PE=4 SV=1                                                           |
| CCG019533.1 | 1014 | 73  | 19 | 3.09348188 | 0.655036744 | -2.239583842 | Down | 1.53E-11 | 3.37E-11 | Uncharacterized protein OS=Anopheles darlingi GN=AND_17189 PE=4 SV=1                                             |
| CCG010011.1 | 786  | 75  | 19 | 4.10016552 | 0.845047403 | -2.278577973 | Down | 4.78E-12 | 1.09E-11 | AAEL002684-PA OS=Aedes aegypti GN=AAEL002684 PE=4 SV=1                                                           |
| CCG004011.1 | 660  | 80  | 19 | 5.20845268 | 1.006374634 | -2.371687378 | Down | 2.51E-13 | 7.06E-13 | Putative reverse transcriptase OS=Anopheles gambiae PE=4 SV=1                                                    |
| CCG005422.1 | 1968 | 83  | 19 | 1.81223982 | 0.337503688 | -2.424798714 | Down | 4.18E-14 | 1.42E-13 | AAEL010471-PA OS=Aedes aegypti GN=AAEL010471 PE=3 SV=1                                                           |
| CCG003040.1 | 1083 | 86  | 19 | 3.41218576 | 0.613303101 | -2.476024037 | Down | 6.82E-15 | 2.45E-14 | AAEL013496-PA OS=Aedes aegypti GN=PPO8 PE=4 SV=1                                                                 |
| CCG013568.1 | 381  | 87  | 19 | 9.81198664 | 1.743326138 | -2.492702779 | Down | 3.71E-15 | 1.34E-14 | AAEL002231-PA OS=Aedes aegypti GN=AAEL002231 PE=4 SV=1                                                           |
| CCG011780.1 | 2070 | 88  | 19 | 1.82673268 | 0.320873072 | -2.509190901 | Down | 2.01E-15 | 7.30E-15 | AAEL011764-PA OS=Aedes aegypti GN=PPO10 PE=4 SV=1                                                                |
| CCG027721.1 | 1384 | 96  | 19 | 2.98055963 | 0.47991854  | -2.634721783 | Down | 1.43E-17 | 5.44E-17 | -                                                                                                                |
| CCG018922.1 | 2385 | 102 | 19 | 1.83769934 | 0.27849361  | -2.722184625 | Down | 3.26E-19 | 1.26E-18 | AAEL000912-PA OS=Aedes aegypti GN=AAEL000912 PE=4 SV=1                                                           |

|             |      |     |    |            |             |              |      |           |           |                                                                                          |
|-------------|------|-----|----|------------|-------------|--------------|------|-----------|-----------|------------------------------------------------------------------------------------------|
| CCG009262.1 | 717  | 109 | 19 | 6.53235854 | 0.926369956 | -2.817943608 | Down | 3.70E-21  | 1.46E-20  | AAEL005165-PA OS=Aedes aegypti GN=AAEL003183 PE=3 SV=1                                   |
| CCG015685.1 | 1074 | 110 | 19 | 4.40099703 | 0.618442513 | -2.831118996 | Down | 1.94E-21  | 7.67E-21  | AAEL0000690-PA OS=Aedes aegypti GN=AAEL000690 PE=3 SV=1                                  |
| CCG005486.1 | 1419 | 113 | 19 | 3.42183228 | 0.468081225 | -2.869938245 | Down | 2.78E-22  | 1.11E-21  | AAEL005004-PA OS=Aedes aegypti GN=AAEL005004 PE=4 SV=1                                   |
| CCG018309.1 | 685  | 113 | 19 | 7.08843797 | 0.969645633 | -2.869938245 | Down | 2.78E-22  | 1.11E-21  | AAEL002221-PA OS=Aedes aegypti GN=AAEL002221 PE=4 SV=1                                   |
| CCG001354.1 | 1125 | 139 | 19 | 5.30914943 | 0.590406452 | -3.168700355 | Down | 9.00E-30  | 3.78E-29  | AAEL010678-PA OS=Aedes aegypti GN=AAEL010678 PE=4 SV=1                                   |
| CCG017896.1 | 668  | 167 | 19 | 10.7424337 | 0.994322244 | -3.433463575 | Down | 4.09E-38  | 1.81E-37  | -                                                                                        |
| CCG027756.1 | 1563 | 192 | 19 | 5.27843189 | 0.424956659 | -3.634721783 | Down | 9.71E-46  | 4.45E-45  | AAEL000863-PA OS=Aedes aegypti GN=AAEL000863 PE=4 SV=1                                   |
| CCG013707.1 | 8613 | 215 | 19 | 1.07262196 | 0.07711683  | -3.797952132 | Down | 7.28E-53  | 3.44E-52  | AAEL000700-PA OS=Aedes aegypti GN=AAEL000700 PE=3 SV=1                                   |
| CCG025368.1 | 1293 | 451 | 19 | 14.9878966 | 0.513694709 | -4.866742906 | Down | 3.85E-129 | 2.14E-128 | AAEL000624-PA OS=Aedes aegypti GN=AAEL006624 PE=4 SV=1                                   |
| CCG025321.1 | 234  | 0   | 20 | 0.001      | 2.987886904 | 11.54490983  | Up   | 7.45E-06  | 1.32E-05  | AAEL007034-PA OS=Aedes aegypti GN=AAEL007034 PE=4 SV=1                                   |
| CCG017177.1 | 387  | 0   | 20 | 0.001      | 1.806629291 | 10.81908479  | Up   | 7.45E-06  | 1.32E-05  | Uncharacterized protein OS=Anopheles darlingi GN=AND_22381 PE=4 SV=1                     |
| CCG016983.1 | 387  | 0   | 20 | 0.001      | 1.806629291 | 10.81908479  | Up   | 7.45E-06  | 1.32E-05  | Putative uncharacterized protein OS=Culex quinquefasciatus GN=CpipJ_CPIJ011615 PE=4 SV=1 |
| CCG013847.1 | 387  | 0   | 20 | 0.001      | 1.806629291 | 10.81908479  | Up   | 7.45E-06  | 1.32E-05  | AAEL001980-PA OS=Aedes aegypti GN=AAEL001980 PE=4 SV=1                                   |
| CCG006777.1 | 660  | 0   | 20 | 0.001      | 1.05934172  | 10.04895233  | Up   | 7.45E-06  | 1.32E-05  | AAEL007525-PA OS=Aedes aegypti GN=AAEL007525 PE=3 SV=1                                   |
| CCG003908.1 | 714  | 0   | 20 | 0.001      | 0.979223439 | 9.935494281  | Up   | 7.45E-06  | 1.32E-05  | -                                                                                        |
| CCG004194.1 | 728  | 0   | 20 | 0.001      | 0.960392219 | 9.907479905  | Up   | 7.45E-06  | 1.32E-05  | Uncharacterized protein OS=Anopheles darlingi GN=AND_11211 PE=4 SV=1                     |
| CCG018230.1 | 822  | 0   | 20 | 0.001      | 0.850566345 | 9.732279961  | Up   | 7.45E-06  | 1.32E-05  | AAEL001637-PA OS=Aedes aegypti GN=AAEL001637 PE=4 SV=1                                   |



|             |      |    |    |            |             |              |      |           |            |                                                                                                                         |
|-------------|------|----|----|------------|-------------|--------------|------|-----------|------------|-------------------------------------------------------------------------------------------------------------------------|
| CCG025315.1 | 905  | 0  | 20 | 0.001      | 0.772558603 | 9.593500563  | Up   | 7.45E-06  | 1.32E-05   | -                                                                                                                       |
| CCG009271.1 | 1686 | 0  | 20 | 0.001      | 0.41468893  | 8.695885724  | Up   | 7.45E-06  | 1.32E-05   | AAEL003201-PA (Fragment)<br>OS=Aedes aegypti<br>GN=AAEL003201 PE=4 SV=1                                                 |
| CCG013602.1 | 1854 | 0  | 20 | 0.001      | 0.377111939 | 8.558849016  | Up   | 7.45E-06  | 1.32E-05   | AAEL000603-PA (Fragment)<br>OS=Aedes aegypti<br>GN=AAEL000603 PE=4 SV=1                                                 |
| CCG015293.1 | 1866 | 2  | 20 | 0.04605545 | 0.374686782 | 3.024241299  | Up   | 0.0005172 | 0.00081184 | AAEL004778-PA OS=Aedes<br>aegypti GN=AAEL004778 PE=3<br>SV=1                                                            |
| CCG006701.1 | 1521 | 2  | 20 | 0.05650195 | 0.459674908 | 3.024241299  | Up   | 0.0005172 | 0.00081189 | AAEL001237-PA (Fragment)<br>OS=Aedes aegypti<br>GN=AAEL001237 PE=4 SV=1                                                 |
| CCG003481.1 | 1157 | 2  | 20 | 0.07427785 | 0.604291733 | 3.024241299  | Up   | 0.0005172 | 0.00081179 | -                                                                                                                       |
| CCG015706.1 | 477  | 2  | 20 | 0.1801666  | 1.46575584  | 3.024241299  | Up   | 0.0005172 | 0.00081194 | Putative uncharacterized protein<br>OS=Culex quinquefasciatus<br>GN=CpipJ_CPIJ002557 PE=4<br>SV=1                       |
| CCG028471.2 | 714  | 41 | 20 | 2.46744975 | 0.979223439 | -1.333310706 | Down | 0.0004667 | 0.00073485 | AAEL005001-PA OS=Aedes<br>aegypti GN=AAEL005001 PE=3<br>SV=1                                                            |
| CCG002390.1 | 1392 | 42 | 20 | 1.29650061 | 0.502274092 | -1.368076124 | Down | 0.000303  | 0.00048206 | RUNX2 OS=Aedes aegypti PE=2<br>SV=1                                                                                     |
| CCG012336.1 | 435  | 43 | 20 | 4.24758296 | 1.607277093 | -1.402023456 | Down | 0.0001955 | 0.0003144  | -                                                                                                                       |
| CCG011461.1 | 803  | 43 | 20 | 2.30099451 | 0.870691825 | -1.402023456 | Down | 0.0001955 | 0.00031442 | Retrotransposon protein, putative,<br>unclassified OS=Oryza sativa<br>subsp. japonica<br>GN=LOC_Os12g44200 PE=4<br>SV=1 |
| CCG007172.1 | 1291 | 44 | 20 | 1.46449909 | 0.541568966 | -1.43519032  | Down | 0.0001253 | 0.00020355 | -                                                                                                                       |
| CCG024393.1 | 651  | 46 | 20 | 3.03626389 | 1.073986998 | -1.499320657 | Down | 5.05E-05  | 8.48E-05   | Putative uncharacterized protein<br>OS=Culex quinquefasciatus<br>GN=CpipJ_CPIJ013896 PE=4<br>SV=1                       |
| CCG002784.1 | 747  | 48 | 20 | 2.76110744 | 0.935964572 | -1.560721202 | Down | 1.99E-05  | 3.43E-05   | Putative uncharacterized protein<br>OS=Culex quinquefasciatus<br>GN=CpipJ_CPIJ018758 PE=4<br>SV=1                       |
| CCG006912.1 | 1149 | 48 | 20 | 1.7950803  | 0.608499161 | -1.560721202 | Down | 1.99E-05  | 3.43E-05   | AAEL005748-PA OS=Aedes<br>aegypti GN=AAEL005748 PE=4<br>SV=1                                                            |

|             |      |    |    |            |             |              |      |          |          |                                                                                            |
|-------------|------|----|----|------------|-------------|--------------|------|----------|----------|--------------------------------------------------------------------------------------------|
| CCG018677.1 | 906  | 48 | 20 | 2.27654223 | 0.771705889 | -1.560721202 | Down | 1.99E-05 | 3.43E-05 | AAEL009792-PA OS=Aedes aegypti GN=AAEL009792 PE=4 SV=1                                     |
| CCG008066.1 | 2435 | 49 | 20 | 0.8646887  | 0.287131637 | -1.590468545 | Down | 1.24E-05 | 2.16E-05 | Putative uncharacterized protein OS=Aedes aegypti PE=4 SV=1                                |
| CCG019210.1 | 1068 | 58 | 20 | 2.33356237 | 0.654649378 | -1.833739696 | Down | 1.40E-07 | 2.67E-07 | AAEL005671-PA OS=Aedes aegypti GN=AAEL005671 PE=4 SV=1                                     |
| CCG011807.1 | 2780 | 60 | 20 | 0.92740434 | 0.251498394 | -1.882649297 | Down | 4.94E-08 | 9.61E-08 | -                                                                                          |
| CCG022789.1 | 2502 | 66 | 20 | 1.1334942  | 0.27944266  | -2.020152821 | Down | 1.98E-09 | 4.05E-09 | Transporter OS=Aedes aegypti GN=AAEL005278 PE=3 SV=1                                       |
| CCG005581.1 | 474  | 69 | 20 | 6.25508795 | 1.475032775 | -2.084283158 | Down | 3.79E-10 | 7.91E-10 | AAEL010187-PA (Fragment) OS=Aedes aegypti GN=AAEL010187 PE=4 SV=1                          |
| CCG011858.1 | 4401 | 69 | 20 | 0.67369045 | 0.158865152 | -2.084283158 | Down | 3.79E-10 | 7.91E-10 | AAEL008598-PA OS=Aedes aegypti GN=AAEL008598 PE=4 SV=1                                     |
| CCG021619.1 | 2334 | 70 | 20 | 1.28872383 | 0.299556785 | -2.105041718 | Down | 2.17E-10 | 4.58E-10 | AAEL011203-PA OS=Aedes aegypti GN=AAEL011203 PE=4 SV=1                                     |
| CCG000038.1 | 666  | 71 | 20 | 4.58085759 | 1.049798101 | -2.125505821 | Down | 1.24E-10 | 2.64E-10 | Gag polyprotein OS=Anopheles gambiae PE=4 SV=1                                             |
| CCG007117.1 | 5409 | 72 | 20 | 0.5719765  | 0.129259666 | -2.145683703 | Down | 7.06E-11 | 1.52E-10 | AAEL006534-PA (Fragment) OS=Aedes aegypti GN=AAEL006534 PE=4 SV=1                          |
| CCG024766.1 | 2325 | 77 | 20 | 1.42308368 | 0.300716359 | -2.242545242 | Down | 4.05E-12 | 9.36E-12 | r-box/reducine rich repeat protein OS=Culex quinquefasciatus GN=CpipJ_CPIJ002568 PE=4 SV=1 |
| CCG011017.1 | 1629 | 79 | 20 | 2.08386067 | 0.429199224 | -2.279539449 | Down | 1.27E-12 | 3.09E-12 | AAEL012524-PA OS=Aedes aegypti GN=AAEL012524 PE=4 SV=1                                     |
| CCG025124.1 | 1341 | 80 | 20 | 2.56344427 | 0.521376238 | -2.297686796 | Down | 7.08E-13 | 1.79E-12 | AAEL011899-PA OS=Aedes aegypti GN=AAEL011899 PE=4 SV=1                                     |
| CCG003304.1 | 717  | 80 | 20 | 4.79439159 | 0.97512627  | -2.297686796 | Down | 7.08E-13 | 1.79E-12 | AAEL009805-PA OS=Aedes aegypti GN=AAEL009805 PE=4 SV=1                                     |
| CCG003912.1 | 495  | 84 | 20 | 7.29183375 | 1.412455627 | -2.368076124 | Down | 6.70E-14 | 2.20E-13 | GF13847 OS=Drosophila ananassae GN=GF13847 PE=4 SV=1                                       |
| CCG011147.1 | 901  | 89 | 20 | 4.24451319 | 0.775988386 | -2.451492132 | Down | 3.35E-15 | 1.21E-14 | -                                                                                          |

|             |      |     |    |            |             |              |      |           |           |                                                                                               |
|-------------|------|-----|----|------------|-------------|--------------|------|-----------|-----------|-----------------------------------------------------------------------------------------------|
| CCG009778.1 | 927  | 90  | 20 | 4.17181889 | 0.754223879 | -2.467611798 | Down | 1.83E-15  | 6.63E-15  | AAEL005779-PA OS=Aedes aegypti GN=AAEL005779 PE=4 SV=1                                        |
| CCG024903.1 | 1294 | 96  | 20 | 3.18786285 | 0.540313397 | -2.560721202 | Down | 4.65E-17  | 1.76E-16  | AAEL000372-PA OS=Aedes aegypti GN=AAEL000372 PE=4 SV=1                                        |
| CCG002673.1 | 720  | 97  | 20 | 5.78897814 | 0.971063244 | -2.575671543 | Down | 2.51E-17  | 9.52E-17  | AAEL011202-PA OS=Aedes aegypti GN=AAEL011202 PE=4 SV=1                                        |
| CCG011196.1 | 1135 | 98  | 20 | 3.71016211 | 0.616004877 | -2.590468545 | Down | 1.35E-17  | 5.14E-17  | Ubiquitin carboxyl-terminal hydrolase OS=Culex quinquefasciatus GN=CpipJ_CPIJ013438 PE=3 SV=1 |
| CCG019751.1 | 1473 | 113 | 20 | 3.29638833 | 0.474654131 | -2.795937664 | Down | 1.04E-21  | 4.10E-21  | AAEL009314-PA OS=Aedes aegypti GN=AAEL009314 PE=4 SV=1                                        |
| CCG014807.1 | 912  | 134 | 20 | 6.31353557 | 0.766628877 | -3.041847892 | Down | 1.12E-27  | 4.65E-27  | AAEL005989-PA OS=Aedes aegypti GN=AAEL005989 PE=4 SV=1                                        |
| CCG005535.1 | 1830 | 159 | 20 | 3.73343596 | 0.38205767  | -3.288641657 | Down | 5.21E-35  | 2.26E-34  | AAEL005345-PA OS=Aedes aegypti GN=AAEL005345 PE=4 SV=1                                        |
| CCG001433.1 | 1170 | 161 | 20 | 5.91292929 | 0.597577381 | -3.306675579 | Down | 1.32E-35  | 5.75E-35  | AAEL006027-PA (Fragment) OS=Aedes aegypti GN=AAEL006027 PE=3 SV=1                             |
| CCG010948.1 | 1494 | 183 | 20 | 5.26336107 | 0.467982286 | -3.49145854  | Down | 3.16E-42  | 1.43E-41  | AAEL014332-PA OS=Aedes aegypti GN=AAEL014332 PE=4 SV=1                                        |
| CCG009348.1 | 682  | 190 | 20 | 11.9710404 | 1.025169407 | -3.54561431  | Down | 2.34E-44  | 1.06E-43  | AAEL012693-PA OS=Aedes aegypti GN=AAEL012693 PE=4 SV=1                                        |
| CCG018040.1 | 696  | 191 | 20 | 11.7919818 | 1.004548183 | -3.553187529 | Down | 1.16E-44  | 5.28E-44  | AAEL010397-PA OS=Aedes aegypti GN=AAEL010397 PE=4 SV=1                                        |
| CCG024052.1 | 3708 | 261 | 20 | 3.0245687  | 0.18855597  | -4.003664698 | Down | 1.84E-66  | 9.00E-66  | AAEL015231-PA OS=Aedes aegypti GN=AAEL015231 PE=4 SV=1                                        |
| CCG027137.1 | 294  | 262 | 20 | 38.2927567 | 2.378114066 | -4.009181703 | Down | 8.86E-67  | 4.35E-66  | -                                                                                             |
| CCG019654.1 | 783  | 332 | 20 | 18.2196065 | 0.892931718 | -4.350798133 | Down | 3.56E-89  | 1.85E-88  | AAEL002738-PA (Fragment) OS=Aedes aegypti GN=AAEL002738 PE=4 SV=1                             |
| CCG015672.1 | 543  | 446 | 20 | 35.2937415 | 1.287597671 | -4.776658601 | Down | 2.22E-126 | 1.23E-125 | AAEL011068-PA OS=Aedes aegypti GN=AAEL011068 PE=4 SV=1                                        |
| CCG006318.2 | 2014 | 530 | 20 | 11.3078249 | 0.347152699 | -5.025607251 | Down | 3.67E-154 | 2.10E-153 | AAEL006334-PA OS=Aedes aegypti GN=AAEL006334 PE=4 SV=1                                        |

|             |      |       |    |            |             |              |      |           |            |                                                                                          |
|-------------|------|-------|----|------------|-------------|--------------|------|-----------|------------|------------------------------------------------------------------------------------------|
| CCG016571.1 | 597  | 33210 | 20 | 2390.32644 | 1.17113155  | -10.9950888  | Down | 0         | 0          | AAEL010180-PA OS=Aedes aegypti GN=AAEL010180 PE=4 SV=1                                   |
| CCG026761.1 | 633  | 0     | 21 | 0.001      | 1.159753258 | 10.17960218  | Up   | 4.11E-06  | 7.35E-06   | AAEL010402-PA OS=Aedes aegypti GN=AAEL010402 PE=3 SV=1                                   |
| CCG000073.1 | 824  | 0     | 21 | 0.001      | 0.890926957 | 9.799163346  | Up   | 4.11E-06  | 7.34E-06   | Putative uncharacterized protein OS=Tribolium castaneum GN=TcasGA2_TC010212 PE=4 SV=1    |
| CCG013494.1 | 836  | 0     | 21 | 0.001      | 0.878138531 | 9.778304741  | Up   | 4.11E-06  | 7.35E-06   | AAEL005156-PA OS=Aedes aegypti GN=AAEL005156 PE=4 SV=1                                   |
| CCG025336.1 | 975  | 0     | 21 | 0.001      | 0.7529475   | 9.556405464  | Up   | 4.11E-06  | 7.35E-06   | AAEL001237-PA (Fragment) OS=Aedes aegypti GN=AAEL001237 PE=4 SV=1                        |
| CCG008479.1 | 1017 | 0     | 21 | 0.001      | 0.721852323 | 9.495559909  | Up   | 4.11E-06  | 7.34E-06   | AAEL007070-PA OS=Aedes aegypti GN=AAEL007070 PE=3 SV=1                                   |
| CCG006699.1 | 4227 | 0     | 21 | 0.001      | 0.173674902 | 7.440245476  | Up   | 4.11E-06  | 7.35E-06   | AAEL002654-PA OS=Aedes aegypti GN=AAEL002654 PE=4 SV=1                                   |
| CCG011750.1 | 891  | 1     | 21 | 0.04822641 | 0.823932449 | 4.094630627  | Up   | 0.0006316 | 0.00098158 | -                                                                                        |
| CCG000734.2 | 465  | 1     | 21 | 0.09240803 | 1.578760886 | 4.094630627  | Up   | 0.0006316 | 0.00098164 | -                                                                                        |
| CCG016336.1 | 777  | 2     | 21 | 0.11060421 | 0.944818291 | 3.094630627  | Up   | 0.0003472 | 0.0005506  | AAEL010959-PA OS=Aedes aegypti GN=AAEL010959 PE=3 SV=1                                   |
| CCG006544.1 | 363  | 2     | 21 | 0.23674785 | 2.022379648 | 3.094630627  | Up   | 0.0003472 | 0.00055056 | Putative uncharacterized protein OS=Culex quinquefasciatus GN=CpipJ_CPIJ001635 PE=4 SV=1 |
| CCG018932.1 | 1002 | 2     | 21 | 0.08576793 | 0.732658495 | 3.094630627  | Up   | 0.0003472 | 0.00055049 | Putative uncharacterized protein OS=Culex quinquefasciatus GN=CpipJ_CPIJ009045 PE=4 SV=1 |
| CCG013642.1 | 354  | 2     | 21 | 0.24276686 | 2.07379608  | 3.094630627  | Up   | 0.0003472 | 0.00055046 | AAEL009961-PA OS=Aedes aegypti GN=AAEL009961 PE=4 SV=1                                   |
| CCG025109.1 | 432  | 2     | 21 | 0.19893396 | 1.699360676 | 3.094630627  | Up   | 0.0003472 | 0.00055053 | -                                                                                        |
| CCG006779.1 | 1479 | 42    | 21 | 1.22023587 | 0.496364985 | -1.297686796 | Down | 0.0005233 | 0.00082113 | AAEL007531-PA OS=Aedes aegypti GN=AAEL007531 PE=4 SV=1                                   |
| CCG020046.1 | 521  | 46    | 21 | 3.79387292 | 1.409066818 | -1.428931329 | Down | 9.24E-05  | 0.0001523  | -                                                                                        |

|             |      |      |    |            |             |              |      |          |          |                                                                                |
|-------------|------|------|----|------------|-------------|--------------|------|----------|----------|--------------------------------------------------------------------------------|
| CCG021569.1 | 430  | 49   | 21 | 4.89655115 | 1.70726468  | -1.520079218 | Down | 2.36E-05 | 4.06E-05 | AAEL004044-PA (Fragment)<br>OS=Aedes aegypti<br>GN=AAEL004044 PE=4 SV=1        |
| CCG013366.1 | 2760 | 52   | 21 | 0.80957471 | 0.265986888 | -1.605809092 | Down | 5.76E-06 | 1.02E-05 | AAEL014568-PA OS=Aedes<br>aegypti GN=AAEL014568 PE=3<br>SV=1                   |
| CCG019563.1 | 1221 | 73   | 21 | 2.56903409 | 0.601248003 | -2.095193932 | Down | 1.01E-10 | 2.16E-10 | -                                                                              |
| CCG022211.1 | 909  | 80   | 21 | 3.78171482 | 0.807616955 | -2.227297468 | Down | 1.92E-12 | 4.59E-12 | Angiotensin 2 OS=Culex<br>quinquefasciatus<br>GN=CpipJ_CPIJ017837 PE=4<br>SV=1 |
| CCG013086.1 | 588  | 88   | 21 | 6.43084464 | 1.248509885 | -2.364800992 | Down | 1.79E-14 | 6.28E-14 | AAEL008440-PA OS=Aedes<br>aegypti GN=AAEL008440 PE=4<br>SV=1                   |
| CCG008185.1 | 1617 | 96   | 21 | 2.55107886 | 0.454003594 | -2.490331874 | Down | 1.46E-16 | 5.48E-16 | AAEL011709-PA (Fragment)<br>OS=Aedes aegypti<br>GN=AAEL011709 PE=4 SV=1        |
| CCG018350.1 | 1659 | 113  | 21 | 2.92681134 | 0.442509833 | -2.725548336 | Down | 3.70E-21 | 1.46E-20 | AAEL008628-PA OS=Aedes<br>aegypti GN=AAEL008628 PE=3<br>SV=1                   |
| CCG016072.1 | 2232 | 124  | 21 | 2.38720748 | 0.328908518 | -2.859565684 | Down | 3.19E-24 | 1.29E-23 | Carboxypeptidase B OS=Aedes<br>aegypti GN=CPB-II PE=2 SV=1                     |
| CCG013148.1 | 948  | 173  | 21 | 7.8415233  | 0.774392207 | -3.339997601 | Down | 1.72E-38 | 7.64E-38 | AAEL000715-PA OS=Aedes<br>aegypti GN=AAEL000715 PE=4<br>SV=1                   |
| CCG002839.1 | 1299 | 179  | 21 | 5.92115666 | 0.565145352 | -3.389185151 | Down | 2.74E-40 | 1.22E-39 | AAEL003958-PA OS=Aedes<br>aegypti GN=AAEL003958 PE=3<br>SV=1                   |
| CCG012215.1 | 993  | 227  | 21 | 9.82288999 | 0.739298905 | -3.731917861 | Down | 5.80E-55 | 2.75E-54 | AAEL011454-PA OS=Aedes<br>aegypti GN=AAEL011454 PE=4<br>SV=1                   |
| CCG012285.1 | 954  | 239  | 21 | 10.7649545 | 0.769521816 | -3.806236181 | Down | 1.07E-58 | 5.15E-58 | AAEL014757-PA OS=Aedes<br>aegypti GN=AAEL014757 PE=4<br>SV=1                   |
| CCG015492.1 | 666  | 316  | 21 | 20.3880422 | 1.102288006 | -4.209150122 | Down | 4.55E-83 | 2.32E-82 | AAEL005777-PA OS=Aedes<br>aegypti GN=AAEL005777 PE=4<br>SV=1                   |
| CCG018048.1 | 1248 | 2201 | 21 | 75.7823605 | 0.588240234 | -7.009312803 | Down | 0        | 0        | AAEL005969-PA OS=Aedes<br>aegypti GN=AAEL005969 PE=4<br>SV=1                   |
| CCG000318.1 | 297  | 0    | 22 | 0.001      | 2.589501983 | 11.33845895  | Up   | 2.26E-06 | 4.09E-06 | -                                                                              |
| CCG005904.1 | 371  | 0    | 22 | 0.001      | 2.072997544 | 11.01750269  | Up   | 2.26E-06 | 4.09E-06 | AAEL010586-PA OS=Aedes<br>aegypti GN=AAEL010586 PE=4<br>SV=1                   |

|             |      |    |    |            |             |              |      |           |            |                                                                                                            |
|-------------|------|----|----|------------|-------------|--------------|------|-----------|------------|------------------------------------------------------------------------------------------------------------|
| CCG006761.1 | 456  | 0  | 22 | 0.001      | 1.686583528 | 10.71988805  | Up   | 2.26E-06  | 4.09E-06   | AGAP003907-PA OS=Anopheles gambiae GN=AGAP003907 PE=4 SV=2                                                 |
| CCG003228.1 | 573  | 0  | 22 | 0.001      | 1.342202599 | 10.39038674  | Up   | 2.26E-06  | 4.09E-06   | modifer of mdg4 OS=Culex quinquefasciatus GN=CpipJ_CPIJ001640 PE=4 SV=1                                    |
| CCG005663.1 | 579  | 0  | 22 | 0.001      | 1.328293763 | 10.37535853  | Up   | 2.26E-06  | 4.09E-06   | AAEL013351-PA OS=Aedes aegypti GN=AAEL013351 PE=3 SV=1                                                     |
| CCG018313.1 | 1032 | 0  | 22 | 0.001      | 0.745234582 | 9.541550813  | Up   | 2.26E-06  | 4.09E-06   | AAEL003984-PA OS=Aedes aegypti GN=AAEL003984 PE=4 SV=1                                                     |
| CCG002259.1 | 425  | 1  | 22 | 0.10110526 | 1.809604915 | 4.161744822  | Up   | 0.0006126 | 0.00095276 | Uncharacterized protein OS=Metarhizium anisopliae (strain ARSEF 23 / ATCC MYA-3075) GN=MAA_00416 PE=4 SV=1 |
| CCG018950.1 | 435  | 1  | 22 | 0.098781   | 1.768004802 | 4.161744822  | Up   | 0.0006126 | 0.0009527  | AAEL006494-PA (Fragment) OS=Aedes aegypti GN=GPRgr45 PE=3 SV=2                                             |
| CCG000678.1 | 456  | 1  | 22 | 0.09423187 | 1.686583528 | 4.161744822  | Up   | 0.0006126 | 0.00095264 | AAEL013835-PA OS=Aedes aegypti GN=AAEL013835 PE=4 SV=1                                                     |
| CCG003689.1 | 933  | 1  | 22 | 0.04605545 | 0.824310921 | 4.161744822  | Up   | 0.0006126 | 0.00095258 | Putative uncharacterized protein OS=Culex quinquefasciatus GN=CpipJ_CPIJ008885 PE=4 SV=1                   |
| CCG017166.1 | 1862 | 2  | 22 | 0.04615439 | 0.413040864 | 3.161744822  | Up   | 0.0002449 | 0.00039213 | RNase H and integrase-like protein (Fragment) OS=Bombyx mori GN=P-1 PE=4 SV=1                              |
| CCG022134.1 | 438  | 2  | 22 | 0.19620883 | 1.75589518  | 3.161744822  | Up   | 0.0002449 | 0.00039216 | AGAP000591-PA OS=Anopheles gambiae GN=AgaP_AGAP000591 PE=3 SV=4                                            |
| CCG013782.1 | 1263 | 44 | 22 | 1.49696621 | 0.60893277  | -1.297686796 | Down | 0.000384  | 0.00060744 | AAEL007784-PA OS=Aedes aegypti GN=AAEL007784 PE=4 SV=1                                                     |
| CCG006444.1 | 2856 | 44 | 22 | 0.66199871 | 0.269286446 | -1.297686796 | Down | 0.000384  | 0.0006074  | AAEL009774-PA OS=Aedes aegypti GN=AAEL009774 PE=3 SV=1                                                     |
| CCG023002.1 | 1941 | 46 | 22 | 1.01834508 | 0.396229824 | -1.361817134 | Down | 0.0001638 | 0.0002643  | AAEL005681-PA OS=Aedes aegypti GN=GPRHIS PE=4 SV=2                                                         |

|             |      |    |    |            |             |              |      |          |            |                                                                                |
|-------------|------|----|----|------------|-------------|--------------|------|----------|------------|--------------------------------------------------------------------------------|
| CCG012201.1 | 1554 | 47 | 22 | 1.29959944 | 0.494904819 | -1.392844029 | Down | 0.000106 | 0.0001728  | Putative protein OS=Culex quinquefasciatus GN=CpipJ_CPIJ012062 PE=4 SV=1       |
| CCG024683.1 | 1479 | 48 | 22 | 1.39455528 | 0.520001412 | -1.423217678 | Down | 6.82E-05 | 0.00011319 | AAEL007260-PA OS=Aedes aegypti GN=AAEL007260 PE=4 SV=1                         |
| CCG022496.1 | 474  | 48 | 22 | 4.35136553 | 1.622536053 | -1.423217678 | Down | 6.82E-05 | 0.0001132  | AGAP003669-PA OS=Anopheles gambiae GN=AgaP_AGAP003669 PE=3 SV=4                |
| CCG014575.1 | 1437 | 49 | 22 | 1.46521712 | 0.535199784 | -1.452965022 | Down | 4.36E-05 | 7.35E-05   | AAEL015017-PA OS=Aedes aegypti GN=AAEL015017 PE=4 SV=1                         |
| CCG017230.3 | 1620 | 53 | 22 | 1.40579996 | 0.47474203  | -1.566175632 | Down | 6.92E-06 | 1.23E-05   | AGAP006349-PA OS=Anopheles gambiae GN=AGAP006349 PE=4 SV=4                     |
| CCG028639.1 | 652  | 56 | 22 | 3.69065205 | 1.179573756 | -1.6456101   | Down | 1.65E-06 | 3.01E-06   | Putative uncharacterized protein OS=Aedes aegypti PE=4 SV=1                    |
| CCG020777.1 | 614  | 57 | 22 | 3.98904702 | 1.252576692 | -1.671145192 | Down | 1.01E-06 | 1.87E-06   | -                                                                              |
| CCG013966.1 | 1986 | 59 | 22 | 1.27654297 | 0.387251807 | -1.720898227 | Down | 3.78E-07 | 7.08E-07   | AAEL006452-PA OS=Aedes aegypti GN=AAEL006452 PE=3 SV=1                         |
| CCG011706.1 | 4512 | 60 | 22 | 0.57140605 | 0.170452591 | -1.745145773 | Down | 2.29E-07 | 4.33E-07   | Ion channel nompC OS=Culex quinquefasciatus GN=CpipJ_CPIJ000429 PE=4 SV=1      |
| CCG009023.1 | 2301 | 61 | 22 | 1.13913681 | 0.334238196 | -1.768992515 | Down | 1.39E-07 | 2.64E-07   | AAEL014203-PA OS=Aedes aegypti GN=AAEL014203 PE=4 SV=1                         |
| CCG010081.1 | 582  | 63 | 22 | 4.65136302 | 1.321446888 | -1.815535101 | Down | 5.00E-08 | 9.71E-08   | AAEL004494-PA (Fragment) OS=Aedes aegypti GN=AAEL004494 PE=4 SV=1              |
| CCG007626.1 | 1534 | 66 | 22 | 1.84876303 | 0.501357294 | -1.882649297 | Down | 1.05E-08 | 2.10E-08   | AAEL002133-PA OS=Aedes aegypti GN=AAEL002133 PE=4 SV=1                         |
| CCG006020.1 | 2555 | 68 | 22 | 1.1436172  | 0.301010602 | -1.925718019 | Down | 3.66E-09 | 7.41E-09   | RNase H and integrase-like protein (Fragment) OS=Bombyx mori GN=P-12 PE=4 SV=1 |
| CCG017496.1 | 1059 | 69 | 22 | 2.79972775 | 0.726234267 | -1.946779634 | Down | 2.15E-09 | 4.39E-09   | AGAP000277-PA OS=Anopheles gambiae GN=AgaP_AGAP000277 PE=4 SV=2                |

|             |      |      |    |            |             |              |      |           |           |                                                                                    |
|-------------|------|------|----|------------|-------------|--------------|------|-----------|-----------|------------------------------------------------------------------------------------|
| CCG014988.1 | 597  | 77   | 22 | 5.54216008 | 1.288244705 | -2.105041718 | Down | 2.71E-11  | 5.90E-11  | AAEL001355-PA OS=Aedes aegypti GN=AAEL001355 PE=4 SV=1                             |
| CCG018863.1 | 1191 | 77   | 22 | 2.77806009 | 0.645744827 | -2.105041718 | Down | 2.71E-11  | 5.90E-11  | AAEL011874-PA OS=Aedes aegypti GN=AAEL011874 PE=4 SV=1                             |
| CCG012189.1 | 2367 | 85   | 22 | 1.54306187 | 0.3249185   | -2.247646114 | Down | 2.87E-13  | 7.98E-13  | AAEL014297-PA OS=Aedes aegypti GN=AAEL014297 PE=4 SV=1                             |
| CCG025058.1 | 1566 | 102  | 22 | 2.79879497 | 0.491112445 | -2.51068052  | Down | 1.16E-17  | 4.41E-17  | AAEL009546-PA OS=Aedes aegypti GN=AAEL009546 PE=4 SV=1                             |
| CCG025084.1 | 1516 | 140  | 22 | 3.9681813  | 0.507310085 | -2.967538194 | Down | 3.60E-28  | 1.50E-27  | AAEL008168-PA OS=Aedes aegypti GN=AAEL008168 PE=4 SV=1                             |
| CCG007371.2 | 2763 | 148  | 22 | 2.30167236 | 0.278350376 | -3.047708543 | Down | 1.81E-30  | 7.63E-30  | AAEL007967-PA OS=Aedes aegypti GN=AAEL007967 PE=4 SV=1                             |
| CCG001038.1 | 1056 | 149  | 22 | 6.06296445 | 0.728297433 | -3.057423698 | Down | 9.29E-31  | 3.93E-30  | Galactose-1-phosphate uridylyltransferase OS=Aedes aegypti GN=AAEL001607 PE=3 SV=1 |
| CCG028022.1 | 1775 | 151  | 22 | 3.65545348 | 0.433285684 | -3.076659917 | Down | 2.45E-31  | 1.04E-30  | AAEL006248-PA OS=Aedes aegypti GN=AAEL006248 PE=4 SV=1                             |
| CCG015646.1 | 2001 | 168  | 22 | 3.60765388 | 0.38434887  | -3.2305726   | Down | 2.58E-36  | 1.13E-35  | AAEL009258-PA OS=Aedes aegypti GN=AAEL009258 PE=4 SV=1                             |
| CCG016997.1 | 1662 | 310  | 22 | 8.01481211 | 0.462744939 | -4.114379583 | Down | 3.17E-80  | 1.61E-79  | AGAP007672-PA OS=Anopheles gambiae GN=AgaP_AGAP007672 PE=3 SV=5                    |
| CCG011876.1 | 1371 | 344  | 22 | 10.781611  | 0.560964325 | -4.264519932 | Down | 4.17E-91  | 2.17E-90  | AAEL003596-PA OS=Aedes aegypti GN=AAEL003596 PE=4 SV=1                             |
| CCG001335.1 | 1137 | 379  | 22 | 14.3232449 | 0.676413447 | -4.404309216 | Down | 2.13E-102 | 1.13E-101 | AAEL005530-PA OS=Aedes aegypti GN=AAEL005530 PE=4 SV=1                             |
| CCG004861.1 | 1185 | 699  | 22 | 25.3467042 | 0.649014421 | -5.287403823 | Down | 4.18E-208 | 2.50E-207 | AAEL001437-PA OS=Aedes aegypti GN=AAEL001437 PE=4 SV=1                             |
| CCG024829.1 | 2865 | 1125 | 22 | 16.8729324 | 0.26844052  | -5.973964464 | Down | 0         | 0         | AAEL004897-PA OS=Aedes aegypti GN=AAEL004897 PE=4 SV=1                             |
| CCG002498.1 | 576  | 5062 | 22 | 377.626383 | 1.33521196  | -8.14374697  | Down | 0         | 0         | AAEL001677-PA OS=Aedes aegypti GN=AAEL001677 PE=4 SV=1                             |
| CCG020332.1 | 273  | 0    | 23 | 0.001      | 2.945202805 | 11.52415127  | Up   | 1.25E-06  | 2.29E-06  | -                                                                                  |



|             |      |   |    |            |             |             |    |           |            |                                                                                                        |
|-------------|------|---|----|------------|-------------|-------------|----|-----------|------------|--------------------------------------------------------------------------------------------------------|
| CCG004746.1 | 515  | 0 | 23 | 0.001      | 1.561243429 | 10.60847978 | Up | 1.25E-06  | 2.29E-06   | tetratricopeptide repeat protein,<br>tpr OS=Culex quinquefasciatus<br>GN=CpipJ_CPIJ016841 PE=4<br>SV=1 |
| CCG027213.1 | 549  | 0 | 23 | 0.001      | 1.4645544   | 10.51624607 | Up | 1.25E-06  | 2.29E-06   | AAEL010722-PA OS=Aedes<br>aegypti GN=AAEL010722 PE=4<br>SV=1                                           |
| CCG018503.1 | 1089 | 0 | 23 | 0.001      | 0.738329078 | 9.528120168 | Up | 1.25E-06  | 2.29E-06   | AAEL005916-PA OS=Aedes<br>aegypti GN=AAEL005916 PE=4<br>SV=1                                           |
| CCG015525.1 | 1938 | 0 | 23 | 0.001      | 0.41488151  | 8.696555551 | Up | 1.25E-06  | 2.29E-06   | AAEL004028-PA OS=Aedes<br>aegypti GN=AAEL004028 PE=3<br>SV=1                                           |
| CCG006816.1 | 921  | 1 | 23 | 0.04665552 | 0.873007998 | 4.22587516  | Up | 0.0006016 | 0.00093599 | AAEL004556-PA OS=Aedes<br>aegypti GN=AAEL004556 PE=4<br>SV=1                                           |
| CCG006460.1 | 528  | 1 | 23 | 0.08138207 | 1.522803723 | 4.22587516  | Up | 0.0006016 | 0.00093605 | Putative uncharacterized protein<br>OS=Culex quinquefasciatus<br>GN=CpipJ_CPIJ003878 PE=4<br>SV=1      |
| CCG025567.1 | 648  | 2 | 23 | 0.13262264 | 1.240803034 | 3.22587516  | Up | 0.0001836 | 0.00029566 | -                                                                                                      |
| CCG016096.1 | 204  | 2 | 23 | 0.42127191 | 3.941374342 | 3.22587516  | Up | 0.0001836 | 0.00029562 | Putative uncharacterized protein<br>OS=Culex quinquefasciatus<br>GN=CpipJ_CPIJ014565 PE=4<br>SV=1      |
| CCG006935.1 | 1371 | 2 | 23 | 0.06268378 | 0.586462703 | 3.22587516  | Up | 0.0001836 | 0.00029558 | AAEL010721-PA OS=Aedes<br>aegypti GN=AAEL010721 PE=4<br>SV=1                                           |
| CCG019990.1 | 849  | 2 | 23 | 0.10122435 | 0.947044011 | 3.22587516  | Up | 0.0001836 | 0.0002956  | AAEL013652-PA OS=Aedes<br>aegypti GN=AAEL013652 PE=3<br>SV=1                                           |
| CCG028594.1 | 915  | 2 | 23 | 0.09392292 | 0.87873264  | 3.22587516  | Up | 0.0001836 | 0.00029564 | AAEL006410-PA OS=Aedes<br>aegypti GN=AAEL006410 PE=4<br>SV=1                                           |
| CCG023081.1 | 621  | 3 | 23 | 0.20758326 | 1.294750992 | 2.640912659 | Up | 0.0004358 | 0.00068724 | AAEL002330-PA OS=Aedes<br>aegypti GN=AAEL002330 PE=4<br>SV=1                                           |
| CCG014696.1 | 2685 | 3 | 23 | 0.04801088 | 0.299456375 | 2.640912659 | Up | 0.0004358 | 0.00068742 | Polyprotein OS=Antheraea mylitta<br>PE=4 SV=1                                                          |
| CCG005736.1 | 828  | 3 | 23 | 0.15568744 | 0.971063244 | 2.640912659 | Up | 0.0004358 | 0.00068737 | AAEL005100-PA OS=Aedes<br>aegypti GN=AAEL005100 PE=4<br>SV=1                                           |
| CCG003624.1 | 2220 | 3 | 23 | 0.05806721 | 0.362180345 | 2.640912659 | Up | 0.0004358 | 0.00068733 | AAEL015386-PA OS=Aedes<br>aegypti GN=AAEL015386 PE=4<br>SV=1                                           |
| CCG003289.1 | 1632 | 3 | 23 | 0.07898848 | 0.492671793 | 2.640912659 | Up | 0.0004358 | 0.00068729 | AAEL004091-PA (Fragment)<br>OS=Aedes aegypti<br>GN=AAEL004091 PE=3 SV=1                                |

|             |      |     |    |            |             |              |      |           |            |                                                                                         |
|-------------|------|-----|----|------------|-------------|--------------|------|-----------|------------|-----------------------------------------------------------------------------------------|
| CCG015263.1 | 867  | 47  | 23 | 2.32938584 | 0.927382198 | -1.328713692 | Down | 0.0001849 | 0.00029772 | AAEL004964-PA OS=Aedes aegypti GN=AAEL004964 PE=4 SV=1                                  |
| CCG004000.1 | 1116 | 48  | 23 | 1.84816063 | 0.720466278 | -1.359087341 | Down | 0.0001206 | 0.00019605 | AAEL002726-PA OS=Aedes aegypti GN=AAEL002726 PE=4 SV=1                                  |
| CCG013388.1 | 1992 | 52  | 23 | 1.1216999  | 0.403634722 | -1.474564558 | Down | 2.06E-05  | 3.54E-05   | AAEL012755-PA OS=Aedes aegypti GN=AAEL012755 PE=4 SV=1                                  |
| CCG010333.1 | 2268 | 55  | 23 | 1.04203501 | 0.354515152 | -1.555484554 | Down | 5.17E-06  | 9.18E-06   | AAEL013476-PA OS=Aedes aegypti GN=AAEL013476 PE=3 SV=1                                  |
| CCG015320.1 | 663  | 56  | 23 | 3.62941951 | 1.212730567 | -1.581479762 | Down | 3.23E-06  | 5.79E-06   | -                                                                                       |
| CCG022508.1 | 1227 | 56  | 23 | 1.96112888 | 0.655289622 | -1.581479762 | Down | 3.23E-06  | 5.79E-06   | -                                                                                       |
| CCG016868.1 | 633  | 62  | 23 | 4.20872598 | 1.270205949 | -1.728321151 | Down | 1.75E-07  | 3.32E-07   | AAEL015308-PA (Fragment) OS=Aedes aegypti GN=SCRAL1 PE=4 SV=2                           |
| CCG004969.1 | 1503 | 70  | 23 | 2.00125178 | 0.534956997 | -1.903407857 | Down | 2.88E-09  | 5.86E-09   | Predicted protein OS=Culex quinquefasciatus GN=CpipJ_CPIJ011425 PE=4 SV=1               |
| CCG027051.1 | 1323 | 76  | 23 | 2.46840501 | 0.607740261 | -2.022052354 | Down | 1.15E-10  | 2.45E-10   | AAEL007016-PA OS=Aedes aegypti GN=AAEL007016 PE=3 SV=1                                  |
| CCG009236.1 | 1617 | 81  | 23 | 2.15247279 | 0.497242032 | -2.113974843 | Down | 7.25E-12  | 1.63E-11   | Beta-1,3-glucan-binding protein OS=Culex quinquefasciatus GN=CpipJ_CPIJ013556 PE=4 SV=1 |
| CCG018282.1 | 966  | 93  | 23 | 4.1368378  | 0.832339923 | -2.313283651 | Down | 7.47E-15  | 2.68E-14   | AAEL014627-PA OS=Aedes aegypti GN=AAEL014627 PE=3 SV=1                                  |
| CCG007530.1 | 1384 | 95  | 23 | 2.94951213 | 0.580954022 | -2.343980448 | Down | 2.30E-15  | 8.34E-15   | Uncharacterized protein OS=Clonorchis sinensis GN=CLF_109243 PE=4 SV=1                  |
| CCG006543.1 | 456  | 102 | 23 | 9.61165116 | 1.763246416 | -2.446550182 | Down | 3.53E-17  | 1.34E-16   | AGAP006213-PA OS=Anopheles gambiae GN=AGAP006213 PE=4 SV=4                              |
| CCG024667.1 | 1011 | 114 | 23 | 4.84525197 | 0.795292152 | -2.607014854 | Down | 2.27E-20  | 8.87E-20   | -                                                                                       |
| CCG000760.1 | 3174 | 115 | 23 | 1.55687444 | 0.253320846 | -2.619614891 | Down | 1.22E-20  | 4.77E-20   | AAEL009473-PA OS=Aedes aegypti GN=AAEL009473 PE=4 SV=1                                  |
| CCG004006.1 | 1338 | 136 | 23 | 4.36762624 | 0.60092703  | -2.861587681 | Down | 1.92E-26  | 7.89E-26   | AAEL010315-PA OS=Aedes aegypti GN=AAEL010315 PE=4 SV=1                                  |

|             |      |      |    |            |             |              |      |           |            |                                                                                                      |
|-------------|------|------|----|------------|-------------|--------------|------|-----------|------------|------------------------------------------------------------------------------------------------------|
| CCG027037.1 | 1483 | 187  | 23 | 5.41830099 | 0.542171521 | -3.3210193   | Down | 2.85E-41  | 1.28E-40   | AAEL006334-PA OS=Aedes aegypti GN=AAEL006334 PE=4 SV=1                                               |
| CCG014134.1 | 386  | 409  | 23 | 45.5301074 | 2.083006129 | -4.450081873 | Down | 4.02E-111 | 2.17E-110  | AAEL001504-PA OS=Aedes aegypti GN=AAEL001504 PE=4 SV=1                                               |
| CCG028320.1 | 1221 | 488  | 23 | 17.1738169 | 0.658509718 | -4.704862178 | Down | 6.49E-137 | 3.64E-136  | AAEL000044-PA OS=Aedes aegypti GN=CYP325Q1 PE=3 SV=1                                                 |
| CCG005493.1 | 2817 | 1909 | 23 | 29.1193551 | 0.28542434  | -6.672726228 | Down | 0         | 0          | AAEL001953-PA OS=Aedes aegypti GN=AAEL001953 PE=4 SV=1                                               |
| CCG000671.1 | 433  | 0    | 24 | 0.001      | 1.937641207 | 10.92008574  | Up   | 6.88E-07  | 1.27E-06   | Nucleosome-remodeling factor subunit NURF301 OS=Culex quinquefasciatus GN=CpipJ_CPIJ011284 PE=4 SV=1 |
| CCG019076.1 | 522  | 0    | 24 | 0.001      | 1.607277093 | 10.65040295  | Up   | 6.88E-07  | 1.27E-06   | AGAP004620-PC OS=Anopheles gambiae GN=AgaP_AGAP004620 PE=3 SV=1                                      |
| CCG000644.1 | 1263 | 0    | 24 | 0.001      | 0.664290295 | 9.375670027  | Up   | 6.88E-07  | 1.27E-06   | AAEL012042-PA (Fragment) OS=Aedes aegypti GN=AAEL012042 PE=3 SV=1                                    |
| CCG002292.1 | 2073 | 0    | 24 | 0.001      | 0.404726793 | 8.66080455   | Up   | 6.88E-07  | 1.27E-06   | AAEL015078-PA OS=Aedes aegypti GN=AAEL015078 PE=4 SV=1                                               |
| CCG022023.1 | 634  | 1    | 24 | 0.06777561 | 1.323341707 | 4.287275705  | Up   | 0.0005954 | 0.00092668 | -                                                                                                    |
| CCG006414.1 | 533  | 1    | 24 | 0.08061864 | 1.574106271 | 4.287275705  | Up   | 0.0005954 | 0.00092685 | -                                                                                                    |
| CCG020550.1 | 513  | 1    | 24 | 0.08376167 | 1.635474937 | 4.287275705  | Up   | 0.0005954 | 0.0009268  | -                                                                                                    |
| CCG007667.1 | 3242 | 1    | 24 | 0.01325408 | 0.258790451 | 4.287275705  | Up   | 0.0005954 | 0.00092674 | Elongation factor 1-alpha OS=Aedes aegypti PE=2 SV=1                                                 |
| CCG012172.1 | 410  | 2    | 24 | 0.20960846 | 2.046338153 | 3.287275705  | Up   | 0.000147  | 0.00023784 | Predicted protein OS=Culex quinquefasciatus GN=CpipJ_CPIJ001647 PE=4 SV=1                            |
| CCG015815.1 | 825  | 2    | 24 | 0.10416905 | 1.016968052 | 3.287275705  | Up   | 0.000147  | 0.00023779 | AAEL012564-PA OS=Aedes aegypti GN=AAEL012564 PE=3 SV=1                                               |
| CCG002416.1 | 1687 | 2    | 24 | 0.05094219 | 0.497331738 | 3.287275705  | Up   | 0.000147  | 0.00023782 | Putative uncharacterized protein OS=Aedes aegypti PE=4 SV=1                                          |
| CCG021794.1 | 297  | 2    | 24 | 0.28935848 | 2.824911254 | 3.287275705  | Up   | 0.000147  | 0.00023781 | AAEL005936-PA OS=Aedes aegypti GN=AAEL005936 PE=4 SV=1                                               |
| CCG019917.1 | 687  | 2    | 24 | 0.12509384 | 1.221249844 | 3.287275705  | Up   | 0.000147  | 0.00023778 | -                                                                                                    |

|             |      |    |    |            |             |              |      |           |            |                                                                                                                                 |
|-------------|------|----|----|------------|-------------|--------------|------|-----------|------------|---------------------------------------------------------------------------------------------------------------------------------|
| CCG017053.1 | 1176 | 3  | 24 | 0.10961667 | 0.71343422  | 2.702313204  | Up   | 0.000288  | 0.00045888 | Uncharacterized protein<br>OS=Anopheles darlingi<br>GN=AND_17550 PE=4 SV=1                                                      |
| CCG003558.1 | 1471 | 3  | 24 | 0.08763372 | 0.570359376 | 2.702313204  | Up   | 0.000288  | 0.00045891 | AGAP001115-PA OS=Anopheles<br>gambiae GN=GPRGR42 PE=3<br>SV=2                                                                   |
| CCG018413.1 | 2788 | 3  | 24 | 0.04623716 | 0.300932081 | 2.702313204  | Up   | 0.000288  | 0.00045885 | -                                                                                                                               |
| CCG021540.1 | 930  | 46 | 24 | 2.12538472 | 0.902149078 | -1.236286252 | Down | 0.0004719 | 0.00074269 | methionine-s-methyltransferase<br>dehydrogenase, mitochondrial<br>OS=Culex quinquefasciatus<br>GN=CpipJ_CPIJ009984 PE=3<br>SV=1 |
| CCG007324.1 | 414  | 48 | 24 | 4.98199822 | 2.026566769 | -1.297686796 | Down | 0.0002072 | 0.00033281 | Putative uncharacterized protein<br>OS=Culex quinquefasciatus<br>GN=CpipJ_CPIJ009250 PE=4<br>SV=1                               |
| CCG007235.1 | 633  | 49 | 24 | 3.32625118 | 1.325432295 | -1.32743414  | Down | 0.000136  | 0.00022051 | AAEL000571-PA OS=Aedes<br>aegypti GN=AAEL000571 PE=4<br>SV=1                                                                    |
| CCG006071.1 | 1311 | 51 | 24 | 1.67159151 | 0.639968453 | -1.385149637 | Down | 5.76E-05  | 9.60E-05   | AAEL007057-PA (Fragment)<br>OS=Aedes aegypti<br>GN=AAEL007057 PE=4 SV=1                                                         |
| CCG013913.1 | 1668 | 52 | 24 | 1.33958405 | 0.502996788 | -1.413164014 | Down | 3.72E-05  | 6.28E-05   | AAEL002775-PA OS=Aedes<br>aegypti GN=AAEL002775 PE=4<br>SV=1                                                                    |
| CCG013354.1 | 1008 | 53 | 24 | 2.25932136 | 0.832339923 | -1.44064475  | Down | 2.39E-05  | 4.10E-05   | -                                                                                                                               |
| CCG021629.1 | 1295 | 53 | 24 | 1.7586069  | 0.6478754   | -1.44064475  | Down | 2.39E-05  | 4.10E-05   | -                                                                                                                               |
| CCG002041.1 | 1519 | 64 | 24 | 1.81044306 | 0.55233617  | -1.712724295 | Down | 1.33E-07  | 2.53E-07   | -                                                                                                                               |
| CCG011895.1 | 1917 | 65 | 24 | 1.45698109 | 0.437662307 | -1.735092108 | Down | 8.09E-08  | 1.56E-07   | AAEL000558-PA OS=Aedes<br>aegypti GN=CYP325E3 PE=3<br>SV=1                                                                      |
| CCG003145.1 | 491  | 76 | 24 | 6.65111982 | 1.708754873 | -1.960651809 | Down | 2.70E-10  | 5.69E-10   | AAEL008001-PA OS=Aedes<br>aegypti GN=AAEL008001 PE=4<br>SV=1                                                                    |
| CCG006403.1 | 618  | 77 | 24 | 5.35383425 | 1.357602981 | -1.979510836 | Down | 1.58E-10  | 3.36E-10   | AAEL008489-PA OS=Aedes<br>aegypti GN=AAEL008489 PE=2<br>SV=1                                                                    |
| CCG011731.1 | 468  | 86 | 24 | 7.89614781 | 1.792732142 | -2.13898905  | Down | 1.11E-12  | 2.72E-12   | -                                                                                                                               |
| CCG015740.1 | 2065 | 94 | 24 | 1.95600729 | 0.406294742 | -2.267313147 | Down | 1.15E-14  | 4.10E-14   | -                                                                                                                               |
| CCG011252.1 | 375  | 98 | 24 | 11.229424  | 2.237329713 | -2.32743414  | Down | 1.11E-15  | 4.03E-15   | AAEL006281-PA (Fragment)<br>OS=Aedes aegypti<br>GN=AAEL006281 PE=3 SV=1                                                         |

|             |      |     |    |            |             |              |      |           |           |                                                                            |
|-------------|------|-----|----|------------|-------------|--------------|------|-----------|-----------|----------------------------------------------------------------------------|
| CCG003272.1 | 3579 | 109 | 24 | 1.30866194 | 0.234422644 | -2.48090862  | Down | 1.55E-18  | 5.95E-18  | Uncharacterized protein<br>OS=Anopheles darlingi<br>GN=AND_23101 PE=4 SV=1 |
| CCG012508.1 | 696  | 118 | 24 | 7.28509868 | 1.20545782  | -2.595367345 | Down | 6.17E-21  | 2.43E-20  | AAEL010918-PA OS=Aedes<br>aegypti GN=AAEL010918 PE=4<br>SV=1               |
| CCG008871.1 | 889  | 146 | 24 | 7.0568968  | 0.943755503 | -2.902548854 | Down | 1.11E-28  | 4.63E-28  | AAEL009225-PA OS=Aedes<br>aegypti GN=AAEL009225 PE=4<br>SV=1               |
| CCG021029.1 | 1410 | 171 | 24 | 5.21122313 | 0.595034498 | -3.13057681  | Down | 7.10E-36  | 3.09E-35  | Lipase OS=Aedes aegypti<br>GN=AAEL014919 PE=3 SV=1                         |
| CCG028273.1 | 736  | 186 | 24 | 10.8591992 | 1.139943808 | -3.251883107 | Down | 2.76E-40  | 1.23E-39  | AAEL001396-PA OS=Aedes<br>aegypti GN=AAEL001396 PE=4<br>SV=1               |
| CCG004186.1 | 1629 | 212 | 24 | 5.59213244 | 0.515039068 | -3.44064475  | Down | 4.58E-48  | 2.12E-47  | AAEL012524-PA OS=Aedes<br>aegypti GN=AAEL012524 PE=4<br>SV=1               |
| CCG025836.1 | 5172 | 265 | 24 | 2.20165887 | 0.162219382 | -3.762572845 | Down | 2.53E-64  | 1.23E-63  | AAEL002204-PA OS=Aedes<br>aegypti GN=AAEL002204 PE=4<br>SV=1               |
| CCG015757.1 | 2372 | 279 | 24 | 5.05419728 | 0.353709377 | -3.836845607 | Down | 1.09E-68  | 5.40E-68  | -                                                                          |
| CCG012208.1 | 453  | 279 | 24 | 26.4648034 | 1.852094134 | -3.836845607 | Down | 1.09E-68  | 5.40E-68  | Superoxide dismutase [Cu-Zn]<br>OS=Aedes aegypti GN=CUSOD4<br>PE=3 SV=2    |
| CCG026579.1 | 981  | 307 | 24 | 13.4472054 | 0.855248361 | -3.974819141 | Down | 1.74E-77  | 8.79E-77  | AAEL000432-PA OS=Aedes<br>aegypti GN=AAEL000432 PE=3<br>SV=1               |
| CCG001578.1 | 1001 | 434 | 24 | 18.6302346 | 0.838160482 | -4.474275528 | Down | 3.15E-118 | 1.72E-117 | AAEL004257-PA (Fragment)<br>OS=Aedes aegypti<br>GN=AAEL004257 PE=4 SV=1    |
| CCG015804.1 | 2952 | 584 | 24 | 8.50078761 | 0.284213632 | -4.902548854 | Down | 1.93E-167 | 1.12E-166 | AAEL007483-PA OS=Aedes<br>aegypti GN=AAEL007483 PE=4<br>SV=1               |
| CCG008001.1 | 951  | 638 | 24 | 28.8272247 | 0.882227805 | -5.030136909 | Down | 2.44E-185 | 1.44E-184 | AAEL004353-PA OS=Aedes<br>aegypti GN=AAEL004353 PE=4<br>SV=1               |
| CCG004155.2 | 372  | 654 | 24 | 75.5435657 | 2.255372695 | -5.065871121 | Down | 1.17E-190 | 6.95E-190 | AAEL004829-PA OS=Aedes<br>aegypti GN=AAEL004829 PE=4<br>SV=1               |
| CCG018722.1 | 1209 | 977 | 24 | 34.7240949 | 0.693960829 | -5.644939047 | Down | 5.35E-299 | 3.37E-298 | AAEL001648-PA (Fragment)<br>OS=Aedes aegypti<br>GN=AAEL001648 PE=3 SV=1    |
| CCG028030.1 | 531  | 0   | 25 | 0.001      | 1.645869905 | 10.68463459  | Up   | 3.80E-07  | 7.11E-07  | -                                                                          |

|             |      |   |    |            |             |             |    |           |            |                                                                                           |
|-------------|------|---|----|------------|-------------|-------------|----|-----------|------------|-------------------------------------------------------------------------------------------|
| CCG017274.1 | 647  | 0 | 25 | 0.001      | 1.350783492 | 10.39958074 | Up | 3.80E-07  | 7.11E-07   | Putative uncharacterized protein (Fragment) OS=Solenopsis invicta GN=SINV_11683 PE=4 SV=1 |
| CCG011964.1 | 702  | 0 | 25 | 0.001      | 1.244952877 | 10.28187542 | Up | 3.80E-07  | 7.11E-07   | Putative uncharacterized protein OS=Culex quinquefasciatus GN=CpipJ_CPIJ000496 PE=4 SV=1  |
| CCG024471.1 | 1170 | 0 | 25 | 0.001      | 0.746971726 | 9.544909825 | Up | 3.80E-07  | 7.11E-07   | AAEL006371-PA OS=Aedes aegypti GN=AAEL006371 PE=3 SV=1                                    |
| CCG006963.1 | 1908 | 0 | 25 | 0.001      | 0.4580487   | 8.839357184 | Up | 3.80E-07  | 7.11E-07   | AAEL006375-PA OS=Aedes aegypti GN=AAEL006375 PE=4 SV=1                                    |
| CCG009344.1 | 1554 | 1 | 25 | 0.02765105 | 0.56239184  | 4.346169394 | Up | 0.0005918 | 0.00092136 | Putative uncharacterized protein OS=Culex quinquefasciatus GN=CpipJ_CPIJ001210 PE=4 SV=1  |
| CCG028585.1 | 609  | 1 | 25 | 0.07055786 | 1.435068833 | 4.346169394 | Up | 0.0005918 | 0.00092153 | -                                                                                         |
| CCG014490.1 | 497  | 1 | 25 | 0.08645822 | 1.758464626 | 4.346169394 | Up | 0.0005918 | 0.00092148 | -                                                                                         |
| CCG015051.1 | 840  | 1 | 25 | 0.05115445 | 1.040424904 | 4.346169394 | Up | 0.0005918 | 0.00092142 | AAEL013780-PA OS=Aedes aegypti GN=AAEL013780 PE=4 SV=1                                    |
| CCG018656.1 | 836  | 2 | 25 | 0.10279841 | 1.045403014 | 3.346169394 | Up | 0.0001252 | 0.0002034  | AAEL005607-PA OS=Aedes aegypti GN=AAEL005607 PE=3 SV=1                                    |
| CCG004492.1 | 838  | 2 | 25 | 0.10255307 | 1.042908018 | 3.346169394 | Up | 0.0001252 | 0.00020337 | -                                                                                         |
| CCG018437.1 | 1701 | 2 | 25 | 0.05052291 | 0.513790076 | 3.346169394 | Up | 0.0001252 | 0.00020338 | AAEL008252-PA OS=Aedes aegypti GN=AAEL008252 PE=3 SV=1                                    |
| CCG022719.1 | 723  | 3 | 25 | 0.17829765 | 1.20879242  | 2.761206893 | Up | 0.0001966 | 0.00031621 | Putative uncharacterized protein OS=Culex quinquefasciatus GN=CpipJ_CPIJ008144 PE=4 SV=1  |
| CCG024386.1 | 2223 | 3 | 25 | 0.05798885 | 0.393143014 | 2.761206893 | Up | 0.0001966 | 0.00031623 | AAEL002752-PA OS=Aedes aegypti GN=AAEL002752 PE=4 SV=1                                    |
| CCG003050.1 | 820  | 3 | 25 | 0.15720635 | 1.065801121 | 2.761206893 | Up | 0.0001966 | 0.00031619 | AGAP003439-PL OS=Anopheles gambiae GN=mod(mdg4) PE=4 SV=1                                 |
| CCG022424.1 | 854  | 4 | 25 | 0.20126339 | 1.023368758 | 2.346169394 | Up | 0.0005384 | 0.00084409 | -                                                                                         |
| CCG003768.1 | 528  | 4 | 25 | 0.32552829 | 1.655221438 | 2.346169394 | Up | 0.0005384 | 0.00084403 | AAEL009244-PA OS=Aedes aegypti GN=AAEL009244 PE=3 SV=1                                    |
| CCG020923.1 | 415  | 4 | 25 | 0.41416612 | 2.105920287 | 2.346169394 | Up | 0.0005384 | 0.00084414 | AAEL010576-PA OS=Aedes aegypti GN=AAEL010576 PE=4 SV=1                                    |

|             |      |    |    |            |             |              |      |           |            |                                                                          |
|-------------|------|----|----|------------|-------------|--------------|------|-----------|------------|--------------------------------------------------------------------------|
| CCG015479.1 | 2796 | 4  | 25 | 0.06147315 | 0.312574005 | 2.346169394  | Up   | 0.0005384 | 0.00084419 | AAEL006287-PA OS=Aedes aegypti GN=PIWI7 PE=4 SV=1                        |
| CCG019909.1 | 988  | 4  | 25 | 0.17396654 | 0.884571781 | 2.346169394  | Up   | 0.0005384 | 0.00084398 | AAEL000135-PA OS=Aedes aegypti GN=AAEL000135 PE=4 SV=1                   |
| CCG006313.1 | 1278 | 4  | 25 | 0.13449056 | 0.683847355 | 2.346169394  | Up   | 0.0005384 | 0.00084424 | AAEL000346-PA OS=Aedes aegypti GN=AAEL006348 PE=4 SV=1                   |
| CCG012289.1 | 1929 | 50 | 25 | 1.11378265 | 0.453062167 | -1.297686796 | Down | 0.0001524 | 0.00024635 | AAEL002824-PA OS=Aedes aegypti GN=AAEL002824 PE=4 SV=1                   |
| CCG012520.1 | 1257 | 50 | 25 | 1.70921776 | 0.695272012 | -1.297686796 | Down | 0.0001524 | 0.00024634 | AAEL000822-PA OS=Aedes aegypti GN=AAEL008822 PE=4 SV=1                   |
| CCG021396.1 | 1323 | 52 | 25 | 1.68890869 | 0.660587241 | -1.354270325 | Down | 6.54E-05  | 0.00010866 | AAEL001632-PA OS=Aedes aegypti GN=AAEL001632 PE=4 SV=1                   |
| CCG004147.1 | 1095 | 52 | 25 | 2.04057187 | 0.798134173 | -1.354270325 | Down | 6.54E-05  | 0.00010867 | AAEL007002-PA OS=Aedes aegypti GN=AAEL007002 PE=4 SV=1                   |
| CCG011327.1 | 1662 | 52 | 25 | 1.3444201  | 0.525846522 | -1.354270325 | Down | 6.54E-05  | 0.00010866 | AAEL005869-PA (Fragment) OS=Aedes aegypti GN=AAEL005869 PE=4 SV=1        |
| CCG003563.1 | 948  | 53 | 25 | 2.40231639 | 0.921895485 | -1.381751061 | Down | 4.25E-05  | 7.16E-05   | AAEL001297-PA OS=Aedes aegypti GN=AAEL001297 PE=4 SV=1                   |
| CCG027336.1 | 3497 | 59 | 25 | 0.72496836 | 0.249916191 | -1.536473656 | Down | 2.88E-06  | 5.17E-06   | AAEL001201-PA OS=Aedes aegypti GN=AAEL001201 PE=4 SV=1                   |
| CCG026569.1 | 773  | 59 | 25 | 3.27970808 | 1.130604035 | -1.536473656 | Down | 2.88E-06  | 5.17E-06   | -                                                                        |
| CCG011883.1 | 882  | 60 | 25 | 2.9231112  | 0.990880861 | -1.560721202 | Down | 1.81E-06  | 3.29E-06   | AAEL005633-PA OS=Aedes aegypti GN=AAEL005633 PE=4 SV=1                   |
| CCG027050.1 | 1043 | 61 | 25 | 2.5130909  | 0.837926097 | -1.584567944 | Down | 1.13E-06  | 2.07E-06   | AAEL007027-PA OS=Aedes aegypti GN=AAEL007027 PE=3 SV=1                   |
| CCG028173.1 | 465  | 70 | 25 | 6.4685622  | 1.879477246 | -1.783113623 | Down | 1.37E-08  | 2.72E-08   | -                                                                        |
| CCG003400.1 | 856  | 77 | 25 | 3.86526818 | 1.020977709 | -1.920617147 | Down | 3.63E-10  | 7.62E-10   | -                                                                        |
| CCG015144.1 | 513  | 78 | 25 | 6.53340994 | 1.703619726 | -1.939232825 | Down | 2.14E-10  | 4.52E-10   | IAP-antagonist michelob_x OS=Aedes albopictus PE=4 SV=1                  |
| CCG000451.1 | 6705 | 86 | 25 | 0.55114052 | 0.13034406  | -2.080095361 | Down | 2.77E-12  | 6.51E-12   | Putative uncharacterized protein OS=Drosophila simulans GN=pol PE=4 SV=1 |
| CCG028075.1 | 1152 | 86 | 25 | 3.20781005 | 0.758643159 | -2.080095361 | Down | 2.77E-12  | 6.51E-12   | AAEL012612-PA OS=Aedes aegypti GN=AAEL012612 PE=4 SV=1                   |

|             |      |     |    |            |             |              |      |           |           |                                                                                          |
|-------------|------|-----|----|------------|-------------|--------------|------|-----------|-----------|------------------------------------------------------------------------------------------|
| CCG009200.1 | 621  | 89  | 25 | 6.15830335 | 1.407338034 | -2.129564037 | Down | 5.21E-13  | 1.35E-12  | AAEL003114-PA OS=Aedes aegypti GN=AAEL003114 PE=4 SV=1                                   |
| CCG023491.1 | 741  | 91  | 25 | 5.27698495 | 1.179429041 | -2.161625247 | Down | 1.69E-13  | 4.97E-13  | AAEL003506-PA OS=Aedes aegypti GN=AAEL003506 PE=3 SV=1                                   |
| CCG007097.1 | 621  | 93  | 25 | 6.43508103 | 1.407338034 | -2.192989418 | Down | 5.43E-14  | 1.81E-13  | AAEL003114-PA OS=Aedes aegypti GN=AAEL003114 PE=4 SV=1                                   |
| CCG027297.1 | 558  | 111 | 25 | 8.54774291 | 1.566231038 | -2.448246473 | Down | 1.40E-18  | 5.37E-18  | Putative uncharacterized protein OS=Culex quinquefasciatus GN=CpipJ_CPIJ002735 PE=4 SV=1 |
| CCG002137.1 | 1302 | 125 | 25 | 4.12535855 | 0.671241874 | -2.619614891 | Down | 2.61E-22  | 1.04E-21  | Putative uncharacterized protein OS=Culex quinquefasciatus GN=CpipJ_CPIJ009310 PE=4 SV=1 |
| CCG018760.1 | 900  | 139 | 25 | 6.63643679 | 0.971063244 | -2.772771679 | Down | 3.80E-26  | 1.56E-25  | AAEL010866-PA OS=Aedes aegypti GN=AAEL010866 PE=3 SV=1                                   |
| CCG004517.1 | 2185 | 172 | 25 | 3.38251458 | 0.399980283 | -3.080095361 | Down | 1.59E-35  | 6.92E-35  | AAEL001687-PA OS=Aedes aegypti GN=AAEL001687 PE=4 SV=1                                   |
| CCG018218.1 | 627  | 182 | 25 | 12.4728735 | 1.393870685 | -3.161625247 | Down | 1.93E-38  | 8.57E-38  | AAEL001156-PA OS=Aedes aegypti GN=AAEL001156 PE=4 SV=1                                   |
| CCG009774.1 | 1581 | 207 | 25 | 5.62601838 | 0.552787425 | -3.347317564 | Down | 7.61E-46  | 3.49E-45  | AAEL006737-PA OS=Aedes aegypti GN=AAEL006737 PE=4 SV=1                                   |
| CCG023442.1 | 1611 | 252 | 25 | 6.72152273 | 0.542493432 | -3.63111053  | Down | 1.66E-59  | 8.00E-59  | AAEL002666-PA OS=Aedes aegypti GN=AAEL002666 PE=4 SV=1                                   |
| CCG022691.1 | 594  | 256 | 25 | 18.5189429 | 1.471307945 | -3.653830606 | Down | 9.77E-61  | 4.73E-60  | AAEL005253-PA OS=Aedes aegypti GN=AAEL005253 PE=4 SV=1                                   |
| CCG017440.1 | 1584 | 406 | 25 | 11.0137072 | 0.551740479 | -4.319166524 | Down | 3.58E-108 | 1.92E-107 | AAEL006241-PA OS=Aedes aegypti GN=AAEL006241 PE=4 SV=1                                   |
| CCG016379.1 | 240  | 0   | 26 | 0.001      | 3.78714665  | 11.88689557  | Up   | 2.09E-07  | 3.96E-07  | AAEL014317-PA OS=Aedes aegypti GN=AAEL014317 PE=4 SV=1                                   |
| CCG023082.1 | 588  | 0   | 26 | 0.001      | 1.545774143 | 10.59411382  | Up   | 2.09E-07  | 3.96E-07  | AAEL012787-PA OS=Aedes aegypti GN=AAEL012787 PE=4 SV=1                                   |
| CCG020796.1 | 954  | 0   | 26 | 0.001      | 0.952741296 | 9.895940712  | Up   | 2.09E-07  | 3.96E-07  | AGAP000537-PA OS=Anopheles gambiae GN=AgaP_AGAP000537 PE=4 SV=5                          |
| CCG007077.1 | 1783 | 0   | 26 | 0.001      | 0.509767356 | 8.993695181  | Up   | 2.09E-07  | 3.96E-07  | Polyprotein OS=Antheraea mylitta PE=4 SV=1                                               |



|             |      |    |    |            |             |              |      |           |            |                                                                                             |
|-------------|------|----|----|------------|-------------|--------------|------|-----------|------------|---------------------------------------------------------------------------------------------|
| CCG013467.1 | 426  | 1  | 26 | 0.10086792 | 2.133603747 | 4.402752922  | Up   | 0.0005897 | 0.00091838 | -                                                                                           |
| CCG011594.1 | 1560 | 2  | 26 | 0.0550894  | 0.582637946 | 3.402752922  | Up   | 0.0001122 | 0.00018266 | AAEL010194-PA OS=Aedes aegypti GN=AAEL010194 PE=4 SV=1                                      |
| CCG003349.1 | 942  | 2  | 26 | 0.09123086 | 0.964878127 | 3.402752922  | Up   | 0.0001122 | 0.00018265 | AAEL005554-PA OS=Aedes aegypti GN=AAEL005554 PE=4 SV=1                                      |
| CCG012401.1 | 1655 | 2  | 26 | 0.05192717 | 0.549193472 | 3.402752922  | Up   | 0.0001122 | 0.00018268 | Putative uncharacterized protein (Fragment) OS=Camponotus floridanus GN=EAG_00896 PE=4 SV=1 |
| CCG011245.1 | 657  | 2  | 26 | 0.13080589 | 1.383432566 | 3.402752922  | Up   | 0.0001122 | 0.00018267 | AAEL010636-PA OS=Aedes aegypti GN=AAEL010636 PE=4 SV=1                                      |
| CCG004282.1 | 396  | 4  | 26 | 0.43403772 | 2.295240394 | 2.402752922  | Up   | 0.0003495 | 0.00055383 | AAEL012397-PA OS=Aedes aegypti GN=AAEL012397 PE=4 SV=1                                      |
| CCG009777.1 | 3455 | 4  | 26 | 0.04974788 | 0.263072416 | 2.402752922  | Up   | 0.0003495 | 0.0005539  | Reverse transcriptase (Protease) (Fragment) OS=Anopheles stephensi PE=4 SV=1                |
| CCG025020.1 | 354  | 4  | 26 | 0.48553372 | 2.567557051 | 2.402752922  | Up   | 0.0003495 | 0.00055387 | -                                                                                           |
| CCG006962.1 | 1295 | 4  | 26 | 0.13272505 | 0.701865016 | 2.402752922  | Up   | 0.0003495 | 0.00055394 | -                                                                                           |
| CCG002300.1 | 1635 | 4  | 26 | 0.10512473 | 0.555911435 | 2.402752922  | Up   | 0.0003495 | 0.0005538  | AAEL009771-PA OS=Aedes aegypti GN=AAEL009771 PE=3 SV=1                                      |
| CCG025721.1 | 712  | 4  | 26 | 0.241403   | 1.276566287 | 2.402752922  | Up   | 0.0003495 | 0.00055376 | Putative uncharacterized protein OS=Culex quinquefasciatus GN=CpipJ_CPIJ001628 PE=4 SV=1    |
| CCG004786.1 | 288  | 51 | 26 | 7.60922384 | 3.155955542 | -1.26967242  | Down | 0.0001695 | 0.00027328 | AAEL012922-PA OS=Aedes aegypti GN=AAEL012922 PE=4 SV=1                                      |
| CCG009956.1 | 963  | 54 | 26 | 2.40951783 | 0.943837171 | -1.35213458  | Down | 4.82E-05  | 8.10E-05   | AAEL008651-PA OS=Aedes aegypti GN=AAEL008651 PE=4 SV=1                                      |
| CCG017999.1 | 1268 | 57 | 26 | 1.93160479 | 0.716810092 | -1.430137092 | Down | 1.31E-05  | 2.28E-05   | Putative uncharacterized protein OS=Culex quinquefasciatus GN=CpipJ_CPIJ018804 PE=4 SV=1    |
| CCG012579.1 | 1575 | 62 | 26 | 1.69150701 | 0.577089013 | -1.551443388 | Down | 1.35E-06  | 2.47E-06   | AAEL002031-PA OS=Aedes aegypti GN=CYP12F7 PE=3 SV=2                                         |
| CCG018373.1 | 312  | 66 | 26 | 9.08975155 | 2.913189731 | -1.641641197 | Down | 2.03E-07  | 3.84E-07   | -                                                                                           |
| CCG028114.1 | 1581 | 99 | 26 | 2.69070444 | 0.574898922 | -2.226603698 | Down | 4.62E-15  | 1.67E-14   | AAEL006737-PA OS=Aedes aegypti GN=AAEL006737 PE=4 SV=1                                      |

|             |      |      |    |            |             |              |      |           |           |                                                                                                                                                                              |
|-------------|------|------|----|------------|-------------|--------------|------|-----------|-----------|------------------------------------------------------------------------------------------------------------------------------------------------------------------------------|
| CCG014909.1 | 1362 | 109  | 26 | 3.43884073 | 0.667338617 | -2.365431403 | Down | 1.35E-17  | 5.15E-17  | AAEL006350-PA OS=Aedes aegypti GN=AAEL006350 PE=4 SV=1                                                                                                                       |
| CCG027236.1 | 1515 | 116  | 26 | 3.29009189 | 0.599944024 | -2.455228073 | Down | 2.06E-19  | 7.97E-19  | AAEL007684-PA OS=Aedes aegypti GN=AAEL007684 PE=4 SV=1                                                                                                                       |
| CCG002545.1 | 1941 | 135  | 26 | 2.98862142 | 0.468271611 | -2.674062675 | Down | 1.68E-24  | 6.79E-24  | AAEL012947-PA OS=Aedes aegypti GN=AAEL012947 PE=4 SV=1                                                                                                                       |
| CCG021107.1 | 681  | 155  | 26 | 9.78018923 | 1.334677234 | -2.873371483 | Down | 4.71E-30  | 1.98E-29  | AAEL002305-PA OS=Aedes aegypti GN=AAEL002305 PE=4 SV=1                                                                                                                       |
| CCG001408.1 | 2055 | 182  | 26 | 3.80559207 | 0.442294499 | -3.105041718 | Down | 8.61E-38  | 3.80E-37  | AAEL012947-PA OS=Aedes aegypti GN=AAEL012947 PE=4 SV=1                                                                                                                       |
| CCG013006.1 | 2019 | 256  | 26 | 5.44836655 | 0.45018088  | -3.597247078 | Down | 5.88E-60  | 2.83E-59  | AAEL011779-PA OS=Aedes aegypti GN=AAEL011779 PE=4 SV=1                                                                                                                       |
| CCG009020.1 | 2082 | 354  | 26 | 7.3060932  | 0.436558692 | -4.064852628 | Down | 1.36E-90  | 7.08E-90  | AAEL003135-PA OS=Aedes aegypti GN=AAEL003135 PE=4 SV=1                                                                                                                       |
| CCG002135.1 | 1779 | 477  | 26 | 11.521396  | 0.510913545 | -4.495092534 | Down | 3.62E-130 | 2.01E-129 | AAEL001835-PA OS=Aedes aegypti GN=AAEL001835 PE=3 SV=1                                                                                                                       |
| CCG020789.1 | 909  | 1191 | 26 | 56.3002793 | 0.999906706 | -5.815204776 | Down | 0         | 0         | AAEL008092-PA OS=Aedes aegypti GN=AAEL008092 PE=4 SV=1                                                                                                                       |
| CCG020663.1 | 663  | 1243 | 26 | 80.560151  | 1.370912815 | -5.876857659 | Down | 0         | 0         | AGAP003308-PA OS=Anopheles gambiae GN=AgaP_AGAP003308 PE=4 SV=5                                                                                                              |
| CCG001710.1 | 735  | 0    | 27 | 0.001      | 1.284181596 | 10.32663351  | Up   | 1.15E-07  | 2.21E-07  | LINE-1 retrotransposon-like element, putative (Fragment) OS=Aspergillus flavus (strain ATCC 200026 / FGSC A1120 / NRRL 3357 / JCM 12722 / SRRCL167) GN=AFLA_063980 PE=4 SV=1 |
| CCG015990.1 | 741  | 0    | 27 | 0.001      | 1.273783364 | 10.31490422  | Up   | 1.15E-07  | 2.21E-07  | Hypsin-2 OS=Culex quinquefasciatus GN=CpipJ_CPIJ000771 PE=3 SV=1                                                                                                             |
| CCG006026.1 | 855  | 0    | 27 | 0.001      | 1.103945582 | 10.10845334  | Up   | 1.15E-07  | 2.21E-07  | AAEL014239-PA OS=Aedes aegypti GN=AAEL014239 PE=4 SV=1                                                                                                                       |
| CCG006931.1 | 942  | 0    | 27 | 0.001      | 1.001988825 | 9.968650703  | Up   | 1.15E-07  | 2.21E-07  | AAEL008202-PA OS=Aedes aegypti GN=AAEL008202 PE=3 SV=1                                                                                                                       |
| CCG007668.1 | 1260 | 0    | 27 | 0.001      | 0.749105931 | 9.549025934  | Up   | 1.15E-07  | 2.21E-07  | -                                                                                                                                                                            |

|             |      |    |    |            |             |              |      |           |            |                                                                                                                 |
|-------------|------|----|----|------------|-------------|--------------|------|-----------|------------|-----------------------------------------------------------------------------------------------------------------|
| CCG012578.1 | 1808 | 0  | 27 | 0.001      | 0.522053912 | 9.02805499   | Up   | 1.15E-07  | 2.21E-07   | AAEL001960-PA OS=Aedes aegypti GN=AAEL001960 PE=3 SV=1                                                          |
| CCG024631.1 | 519  | 1  | 27 | 0.08279332 | 1.818638676 | 4.457200706  | Up   | 0.0005885 | 0.00091666 | AAEL014348-PB OS=Aedes aegypti GN=CASPS8 PE=4 SV=1                                                              |
| CCG003047.1 | 324  | 1  | 27 | 0.13262264 | 2.913189731 | 4.457200706  | Up   | 0.0005885 | 0.00091666 | -                                                                                                               |
| CCG018098.1 | 1053 | 2  | 27 | 0.08161393 | 0.896366071 | 3.457200706  | Up   | 0.0001045 | 0.00017044 | AAEL011917-PA OS=Aedes aegypti GN=AAEL011917 PE=3 SV=1                                                          |
| CCG019808.1 | 859  | 3  | 27 | 0.15006892 | 1.098804974 | 2.872238205  | Up   | 0.0001061 | 0.00017287 | Zinc knuckle domain protein (Fragment) OS=Wolbachia endosymbiont of Drosophila ananassae GN=WwAna1051 PE=4 SV=1 |
| CCG026255.1 | 1727 | 4  | 27 | 0.09952457 | 0.546539359 | 2.457200706  | Up   | 0.0002299 | 0.00036822 | -                                                                                                               |
| CCG001934.1 | 3426 | 4  | 27 | 0.05016898 | 0.275503057 | 2.457200706  | Up   | 0.0002299 | 0.0003682  | AAEL002146-PA OS=Aedes aegypti GN=AAEL002146 PE=4 SV=1                                                          |
| CCG013608.1 | 1236 | 5  | 27 | 0.17382579 | 0.763651677 | 2.135272611  | Up   | 0.0006384 | 0.00099182 | AAEL010207-PA OS=Aedes aegypti GN=AAEL010207 PE=3 SV=1                                                          |
| CCG021236.1 | 1182 | 5  | 27 | 0.18176707 | 0.798539317 | 2.135272611  | Up   | 0.0006384 | 0.0009917  | AAEL005444-PA OS=Aedes aegypti GN=CASPS19 PE=3 SV=1                                                             |
| CCG021063.1 | 498  | 5  | 27 | 0.43142304 | 1.895328259 | 2.135272611  | Up   | 0.0006384 | 0.00099176 | AAEL005128-PA OS=Aedes aegypti GN=AAEL005128 PE=4 SV=1                                                          |
| CCG017352.1 | 686  | 50 | 27 | 3.13190486 | 1.375908853 | -1.186655484 | Down | 0.000416  | 0.00065705 | AAEL007131-PA OS=Aedes aegypti GN=AAEL007131 PE=4 SV=1                                                          |
| CCG011493.1 | 306  | 54 | 27 | 7.58289434 | 3.084553833 | -1.297686796 | Down | 8.26E-05  | 0.00013624 | AAEL006079-PA OS=Aedes aegypti GN=AAEL006079 PE=4 SV=1                                                          |
| CCG015926.1 | 1821 | 56 | 27 | 1.32141963 | 0.518327003 | -1.350154216 | Down | 3.56E-05  | 6.02E-05   | CYP302a1 OS=Aedes aegypti PE=2 SV=1                                                                             |
| CCG010087.1 | 888  | 58 | 27 | 2.80658177 | 1.062920578 | -1.400780289 | Down | 1.50E-05  | 2.61E-05   | AAEL008909-PA OS=Aedes aegypti GN=AAEL008909 PE=4 SV=1                                                          |
| CCG018039.1 | 897  | 62 | 27 | 2.9700374  | 1.052255823 | -1.496995604 | Down | 2.53E-06  | 4.55E-06   | AAEL010395-PA OS=Aedes aegypti GN=AAEL010395 PE=4 SV=1                                                          |
| CCG018933.1 | 707  | 66 | 27 | 4.01131893 | 1.335040273 | -1.587193413 | Down | 3.96E-07  | 7.41E-07   | Putative gag-pol polyprotein OS=Oryza sativa subsp. japonica GN=OSJNBa0013O08.17 PE=4 SV=1                      |

|             |      |     |    |            |             |              |      |          |          |                                                                       |
|-------------|------|-----|----|------------|-------------|--------------|------|----------|----------|-----------------------------------------------------------------------|
| CCG028223.1 | 703  | 68  | 27 | 4.15638969 | 1.342636519 | -1.630262135 | Down | 1.53E-07 | 2.90E-07 | Copia OS=Drosophila simulans<br>GN=GIP PE=4 SV=1                      |
| CCG021421.1 | 676  | 73  | 27 | 4.64022282 | 1.396262534 | -1.732623853 | Down | 1.33E-08 | 2.64E-08 | AAEL009215-PA OS=Aedes<br>aegypti GN=AAEL009215 PE=4<br>SV=1          |
| CCG001518.1 | 2120 | 76  | 27 | 1.54042445 | 0.445223336 | -1.790726807 | Down | 2.94E-09 | 5.98E-09 | AAEL010599-PA OS=Aedes<br>aegypti GN=AAEL010599 PE=4<br>SV=1          |
| CCG024807.1 | 1592 | 78  | 27 | 2.10530107 | 0.592885347 | -1.828201513 | Down | 1.06E-09 | 2.18E-09 | Gag-like protein OS=Aedes<br>aegypti PE=4 SV=1                        |
| CCG026376.1 | 721  | 80  | 27 | 4.76779302 | 1.309117161 | -1.864727389 | Down | 3.76E-10 | 7.86E-10 | -                                                                     |
| CCG016011.1 | 1131 | 82  | 27 | 3.11540074 | 0.834547721 | -1.900351299 | Down | 1.32E-10 | 2.82E-10 | AAEL002730-PA OS=Aedes<br>aegypti GN=SRPN21 PE=3 SV=1                 |
| CCG018055.1 | 1500 | 89  | 27 | 2.54953759 | 0.629248982 | -2.018532725 | Down | 3.13E-12 | 7.32E-12 | AAEL011332-PA OS=Aedes<br>aegypti GN=AAEL011332 PE=4<br>SV=1          |
| CCG024092.1 | 780  | 97  | 27 | 5.34367212 | 1.210094196 | -2.142712136 | Down | 3.74E-14 | 1.29E-13 | AAEL009876-PA OS=Aedes<br>aegypti GN=AAEL009876 PE=3<br>SV=1          |
| CCG022142.1 | 2031 | 100 | 27 | 2.11569348 | 0.464733369 | -2.186655484 | Down | 6.87E-15 | 2.47E-14 | -                                                                     |
| CCG023656.1 | 1581 | 105 | 27 | 2.85377744 | 0.597010419 | -2.257044812 | Down | 3.91E-16 | 1.46E-15 | AAEL012404-PA OS=Aedes<br>aegypti GN=AAEL012404 PE=4<br>SV=1          |
| CCG026389.1 | 1719 | 117 | 27 | 2.92464162 | 0.549082881 | -2.413164014 | Down | 3.35E-19 | 1.30E-18 | AAEL002741-PA OS=Aedes<br>aegypti GN=SCRB6 PE=4 SV=2                  |
| CCG027640.1 | 1359 | 118 | 27 | 3.73099977 | 0.6945353   | -2.425442343 | Down | 1.84E-19 | 7.15E-19 | AAEL012720-PA OS=Aedes<br>aegypti GN=AAEL012720 PE=4<br>SV=1          |
| CCG025140.1 | 1239 | 132 | 27 | 4.5778894  | 0.761802642 | -2.587193413 | Down | 3.62E-23 | 1.45E-22 | AAEL008745-PA OS=Aedes<br>aegypti GN=AAEL008745 PE=4<br>SV=1          |
| CCG015397.1 | 1056 | 141 | 27 | 5.73743616 | 0.893819577 | -2.682350646 | Down | 1.31E-25 | 5.37E-25 | AAEL004295-PA OS=Aedes<br>aegypti GN=AAEL004295 PE=4<br>SV=1          |
| CCG027434.1 | 345  | 143 | 27 | 17.8106436 | 2.735865139 | -2.702670631 | Down | 3.73E-26 | 1.53E-25 | AAEL014852-PA OS=Aedes<br>aegypti GN=AAEL014852 PE=2<br>SV=1          |
| CCG027973.1 | 912  | 146 | 27 | 6.87892681 | 1.034948983 | -2.732623853 | Down | 5.58E-27 | 2.30E-26 | AAEL013483-PA OS=Aedes<br>aegypti GN=AAEL013483 PE=4<br>SV=1          |
| CCG021639.1 | 886  | 146 | 27 | 7.08079148 | 1.065319947 | -2.732623853 | Down | 5.58E-27 | 2.30E-26 | Polyprotein OS=Antheraea mylitta<br>PE=4 SV=1                         |
| CCG022133.1 | 1203 | 155 | 27 | 5.53641635 | 0.784599728 | -2.818923699 | Down | 1.77E-29 | 7.44E-29 | AGAP000592-PA OS=Anopheles<br>gambiae GN=AgaP_AGAP000592<br>PE=4 SV=3 |

|             |      |     |    |            |             |              |      |           |            |                                                                                                        |
|-------------|------|-----|----|------------|-------------|--------------|------|-----------|------------|--------------------------------------------------------------------------------------------------------|
| CCG021550.1 | 1851 | 159 | 27 | 3.69107931 | 0.509926241 | -2.855682249 | Down | 1.34E-30  | 5.67E-30   | AGAP004287-PA OS=Anopheles gambiae GN=AgaP_AGAP004287 PE=4 SV=5                                        |
| CCG017042.1 | 1137 | 169 | 27 | 6.38688228 | 0.830143776 | -2.94367873  | Down | 1.99E-33  | 8.52E-33   | AAEL010232-PA OS=Aedes aegypti GN=AAEL010232 PE=4 SV=1                                                 |
| CCG007838.1 | 888  | 176 | 27 | 8.51652398 | 1.062920578 | -3.002230913 | Down | 1.98E-35  | 8.62E-35   | AAEL002791-PA OS=Aedes aegypti GN=AAEL002791 PE=4 SV=1                                                 |
| CCG026670.1 | 1206 | 178 | 27 | 6.3421333  | 0.782647987 | -3.018532725 | Down | 5.28E-36  | 2.30E-35   | AAEL014394-PA OS=Aedes aegypti GN=CYP301A1 PE=3 SV=2                                                   |
| CCG001530.1 | 2259 | 449 | 27 | 8.54068652 | 0.417828009 | -4.353370929 | Down | 4.32E-120 | 2.36E-119  | AAEL002354-PA OS=Aedes aegypti GN=HPX5 PE=4 SV=2                                                       |
| CCG013463.1 | 1215 | 572 | 27 | 20.229373  | 0.776850595 | -4.702670631 | Down | 3.69E-160 | 2.12E-159  | AAEL005530-PA OS=Aedes aegypti GN=AAEL005530 PE=4 SV=1                                                 |
| CCG003930.1 | 354  | 0   | 28 | 0.001      | 2.76506144  | 11.43309582  | Up   | 6.36E-08  | 1.23E-07   | -                                                                                                      |
| CCG003756.1 | 390  | 0   | 28 | 0.001      | 2.509824999 | 11.29337106  | Up   | 6.36E-08  | 1.23E-07   | -                                                                                                      |
| CCG011336.1 | 558  | 0   | 28 | 0.001      | 1.754178763 | 10.77658006  | Up   | 6.36E-08  | 1.23E-07   | AAEL010291-PA OS=Aedes aegypti GN=AAEL010291 PE=4 SV=1                                                 |
| CCG027450.1 | 669  | 0   | 28 | 0.001      | 1.463126681 | 10.51483897  | Up   | 6.36E-08  | 1.23E-07   | -                                                                                                      |
| CCG028048.1 | 848  | 0   | 28 | 0.001      | 1.154282724 | 10.17278092  | Up   | 6.36E-08  | 1.23E-07   | -                                                                                                      |
| CCG027564.1 | 2505 | 0   | 28 | 0.001      | 0.390751197 | 8.610106484  | Up   | 6.36E-08  | 1.23E-07   | Protein translocase subunit SecA OS=Wolbachia endosymbiont of Muscidifurax uniraptor GN=secA PE=3 SV=1 |
| CCG007712.1 | 1680 | 2   | 28 | 0.05115445 | 0.582637946 | 3.509668126  | Up   | 0.0001    | 0.00016314 | Chaperone protein DnaK OS=Wolbachia pipientis wAlbB GN=dnaK PE=3 SV=1                                  |
| CCG017638.1 | 588  | 2   | 28 | 0.14615556 | 1.664679846 | 3.509668126  | Up   | 0.0001    | 0.00016313 | AAEL011649-PA OS=Aedes aegypti GN=AAEL011649 PE=4 SV=1                                                 |
| CCG006044.1 | 1140 | 2   | 28 | 0.0753855  | 0.858624342 | 3.509668126  | Up   | 0.0001    | 0.00016311 | tenon-g OS=Culex quinquefasciatus GN=CpipJ_CPIJ008961 PE=4 SV=1                                        |
| CCG024584.1 | 2261 | 2   | 28 | 0.0380095  | 0.432919836 | 3.509668126  | Up   | 0.0001    | 0.00016312 | Pol polyprotein (Fragment) OS=Anopheles gambiae PE=4 SV=1                                              |

|             |      |    |    |            |             |              |      |           |            |                                                                                          |
|-------------|------|----|----|------------|-------------|--------------|------|-----------|------------|------------------------------------------------------------------------------------------|
| CCG004237.1 | 558  | 3  | 28 | 0.23102008 | 1.754178763 | 2.924705625  | Up   | 8.51E-05  | 0.00014033 | AAEL010421-PA OS=Aedes aegypti GN=AAEL010421 PE=4 SV=1                                   |
| CCG023916.1 | 273  | 3  | 28 | 0.47219489 | 3.585464284 | 2.924705625  | Up   | 8.51E-05  | 0.00014032 | -                                                                                        |
| CCG027873.1 | 493  | 4  | 28 | 0.34863882 | 1.985459938 | 2.509668126  | Up   | 0.0001545 | 0.00024957 | Putative uncharacterized protein OS=Culex quinquefasciatus GN=CpipJ_CPIJ001628 PE=4 SV=1 |
| CCG027942.1 | 1104 | 4  | 28 | 0.15568744 | 0.886622962 | 2.509668126  | Up   | 0.0001545 | 0.00024955 | RUNX1 OS=Aedes aegypti PE=2 SV=1                                                         |
| CCG025024.1 | 1229 | 5  | 28 | 0.17481584 | 0.796445687 | 2.187740031  | Up   | 0.0004152 | 0.00065583 | -                                                                                        |
| CCG017915.1 | 404  | 51 | 28 | 5.42439719 | 2.422850865 | -1.162757216 | Down | 0.0004521 | 0.00071238 | -                                                                                        |
| CCG007837.1 | 255  | 52 | 28 | 8.76245569 | 3.838555881 | -1.190771592 | Down | 0.0003062 | 0.00048691 | AAEL002812-PA OS=Aedes aegypti GN=AAEL002812 PE=4 SV=1                                   |
| CCG015890.1 | 1052 | 52 | 28 | 2.12397928 | 0.930448431 | -1.190771592 | Down | 0.0003062 | 0.00048688 | Endonuclease-reverse transcriptase OS=Schistosoma mansoni PE=2 SV=1                      |
| CCG027002.1 | 764  | 54 | 28 | 3.03712784 | 1.28119339  | -1.245219376 | Down | 0.000138  | 0.00022366 | -                                                                                        |
| CCG014141.1 | 784  | 62 | 28 | 3.39811677 | 1.248509885 | -1.444528185 | Down | 4.61E-06  | 8.21E-06   | -                                                                                        |
| CCG028587.1 | 429  | 66 | 28 | 6.6107284  | 2.28165909  | -1.534725993 | Down | 7.53E-07  | 1.39E-06   | AAEL011232-PA OS=Aedes aegypti GN=AAEL011232 PE=4 SV=1                                   |
| CCG022041.1 | 1098 | 68 | 28 | 2.66114932 | 0.891467896 | -1.577794715 | Down | 2.97E-07  | 5.57E-07   | AAEL006265-PA (Fragment) OS=Aedes aegypti GN=AAEL006265 PE=4 SV=1                        |
| CCG026019.1 | 585  | 70 | 28 | 5.14167765 | 1.673216666 | -1.619614891 | Down | 1.15E-07  | 2.21E-07   | Putative uncharacterized protein OS=Culex quinquefasciatus GN=CpipJ_CPIJ009687 PE=4 SV=1 |
| CCG007985.1 | 1680 | 70 | 28 | 1.79040561 | 0.582637946 | -1.619614891 | Down | 1.15E-07  | 2.21E-07   | AAEL004991-PA OS=Aedes aegypti GN=AAEL004991 PE=4 SV=1                                   |
| CCG009094.1 | 491  | 72 | 28 | 6.30106088 | 1.993547352 | -1.660256876 | Down | 4.40E-08  | 8.57E-08   | -                                                                                        |
| CCG013828.1 | 1425 | 73 | 28 | 2.20125658 | 0.686899473 | -1.680156433 | Down | 2.71E-08  | 5.32E-08   | AAEL011874-PA OS=Aedes aegypti GN=AAEL011874 PE=4 SV=1                                   |
| CCG026250.1 | 1129 | 74 | 28 | 2.81643965 | 0.866990035 | -1.69978524  | Down | 1.66E-08  | 3.28E-08   | Putative uncharacterized protein OS=Culex quinquefasciatus GN=CpipJ_CPIJ009588 PE=4 SV=1 |
| CCG023439.1 | 809  | 75 | 28 | 3.98359715 | 1.209927997 | -1.719150565 | Down | 1.01E-08  | 2.02E-08   | -                                                                                        |

|             |      |     |    |            |             |              |      |           |           |                                                                                                   |
|-------------|------|-----|----|------------|-------------|--------------|------|-----------|-----------|---------------------------------------------------------------------------------------------------|
| CCG025011.1 | 525  | 77  | 28 | 6.30222774 | 1.864441428 | -1.757118415 | Down | 3.74E-09  | 7.56E-09  | Putative uncharacterized protein<br>OS=Culex quinquefasciatus<br>GN=CpipJ_CPIJ012798 PE=4<br>SV=1 |
| CCG017698.1 | 1275 | 100 | 28 | 3.37017526 | 0.767711176 | -2.134188064 | Down | 1.76E-14  | 6.19E-14  | AAEL013648-PA OS=Aedes<br>aegypti GN=AAEL013648 PE=4<br>SV=1                                      |
| CCG007852.1 | 1233 | 109 | 28 | 3.79862212 | 0.793861922 | -2.258516199 | Down | 1.05E-16  | 3.94E-16  | Putative uncharacterized protein<br>OS=Culex quinquefasciatus<br>GN=CpipJ_CPIJ010318 PE=4<br>SV=1 |
| CCG024729.1 | 885  | 119 | 28 | 5.77785132 | 1.106024576 | -2.385149637 | Down | 2.97E-19  | 1.15E-18  | AAEL010943-PA OS=Aedes<br>aegypti GN=AAEL010943 PE=4<br>SV=1                                      |
| CCG011721.1 | 1290 | 126 | 28 | 4.19704385 | 0.758784302 | -2.467611798 | Down | 4.46E-21  | 1.76E-20  | AAEL013637-PA OS=Aedes<br>aegypti GN=AAEL013637 PE=4<br>SV=1                                      |
| CCG017541.1 | 399  | 169 | 28 | 18.2002134 | 2.453212405 | -2.89121131  | Down | 7.79E-33  | 3.33E-32  | Putative uncharacterized protein<br>OS=Culex quinquefasciatus<br>GN=CpipJ_CPIJ002607 PE=4<br>SV=1 |
| CCG015384.1 | 558  | 176 | 28 | 13.5531779 | 1.754178763 | -2.949763493 | Down | 8.05E-35  | 3.48E-34  | pHCl, isoform 1 OS=Drosophila<br>melanogaster GN=pHCl PE=4<br>SV=1                                |
| CCG015896.1 | 1389 | 176 | 28 | 5.44468919 | 0.704702484 | -2.949763493 | Down | 8.05E-35  | 3.48E-34  | AAEL006700-PA OS=Aedes<br>aegypti GN=AAEL006700 PE=3<br>SV=1                                      |
| CCG027202.1 | 2097 | 182 | 28 | 3.72937134 | 0.466777182 | -2.998126514 | Down | 1.55E-36  | 6.78E-36  | AAEL011512-PA OS=Aedes<br>aegypti GN=AAEL011512 PE=4<br>SV=1                                      |
| CCG024949.1 | 627  | 183 | 28 | 12.5414058 | 1.561135167 | -3.006031712 | Down | 8.01E-37  | 3.51E-36  | Putative uncharacterized protein<br>OS=Culex quinquefasciatus<br>GN=CpipJ_CPIJ015249 PE=4<br>SV=1 |
| CCG008370.1 | 807  | 199 | 28 | 10.5960064 | 1.212926579 | -3.126956495 | Down | 1.87E-41  | 8.41E-41  | AAEL005008-PA OS=Aedes<br>aegypti GN=AAEL005008 PE=2<br>SV=1                                      |
| CCG013417.1 | 1440 | 212 | 28 | 6.32609982 | 0.679744271 | -3.218252329 | Down | 2.88E-45  | 1.32E-44  | AAEL007218-PA OS=Aedes<br>aegypti GN=AAEL007218 PE=4<br>SV=1                                      |
| CCG025827.1 | 1710 | 274 | 28 | 6.88520894 | 0.572416228 | -3.588363957 | Down | 6.27E-64  | 3.05E-63  | AAEL010856-PA OS=Aedes<br>aegypti GN=AAEL010856 PE=4<br>SV=1                                      |
| CCG002864.1 | 1770 | 460 | 28 | 11.1672757 | 0.553012288 | -4.335821925 | Down | 1.16E-122 | 6.37E-122 | AAEL008603-PA OS=Aedes<br>aegypti GN=AAEL008603 PE=4<br>SV=1                                      |
| CCG027885.1 | 428  | 0   | 29 | 0.001      | 2.368668286 | 11.20986046  | Up   | 3.51E-08  | 6.86E-08  | Putative uncharacterized protein<br>(Fragment) OS=Solenopsis invicta<br>GN=SINV_11683 PE=4 SV=1   |

|             |      |    |    |            |             |              |      |           |            |                                                                                          |
|-------------|------|----|----|------------|-------------|--------------|------|-----------|------------|------------------------------------------------------------------------------------------|
| CCG027673.1 | 428  | 0  | 29 | 0.001      | 2.368668286 | 11.20986046  | Up   | 3.51E-08  | 6.85E-08   | AAEL010609-PA OS=Aedes aegypti GN=AAEL010609 PE=4 SV=1                                   |
| CCG000320.1 | 816  | 0  | 29 | 0.001      | 1.242389738 | 10.2789021   | Up   | 3.51E-08  | 6.85E-08   | AAEL005607-PA OS=Aedes aegypti GN=AAEL005607 PE=3 SV=1                                   |
| CCG018585.3 | 1455 | 0  | 29 | 0.001      | 0.696762905 | 9.444524007  | Up   | 3.51E-08  | 6.85E-08   | AAEL005905-PA OS=Aedes aegypti GN=CASPS15 PE=3 SV=1                                      |
| CCG018071.1 | 1569 | 0  | 29 | 0.001      | 0.646137684 | 9.335697808  | Up   | 3.51E-08  | 6.85E-08   | AGAP001625-PA OS=Anopheles gambiae GN=AgaP_AGAP001625 PE=4 SV=5                          |
| CCG000275.1 | 762  | 1  | 29 | 0.05639073 | 1.330433106 | 4.560294199  | Up   | 0.0005875 | 0.00091512 | -                                                                                        |
| CCG014797.1 | 1152 | 1  | 29 | 0.03730012 | 0.880026065 | 4.560294199  | Up   | 0.0005875 | 0.00091518 | AAEL008459-PA OS=Aedes aegypti GN=AAEL008459 PE=4 SV=1                                   |
| CCG019376.1 | 612  | 1  | 29 | 0.07021198 | 1.656519651 | 4.560294199  | Up   | 0.0005875 | 0.00091507 | AAEL006639-PA OS=Aedes aegypti GN=AAEL006639 PE=4 SV=1                                   |
| CCG020649.1 | 643  | 2  | 29 | 0.13365392 | 1.57665634  | 3.560294199  | Up   | 9.73E-05  | 0.00015886 | -                                                                                        |
| CCG001033.1 | 642  | 2  | 29 | 0.1338621  | 1.579112191 | 3.560294199  | Up   | 9.73E-05  | 0.00015887 | -                                                                                        |
| CCG013766.1 | 1635 | 2  | 29 | 0.05256237 | 0.620055062 | 3.560294199  | Up   | 9.73E-05  | 0.00015885 | AAEL011341-PA OS=Aedes aegypti GN=AAEL011341 PE=3 SV=1                                   |
| CCG014413.1 | 418  | 2  | 29 | 0.20559682 | 2.425334991 | 3.560294199  | Up   | 9.73E-05  | 0.00015888 | -                                                                                        |
| CCG018635.1 | 198  | 3  | 29 | 0.65105659 | 5.120151648 | 2.975331698  | Up   | 7.23E-05  | 0.00011982 | -                                                                                        |
| CCG018713.1 | 1983 | 3  | 29 | 0.06500716 | 0.511240558 | 2.975331698  | Up   | 7.23E-05  | 0.00011981 | AAEL000801-PA OS=Aedes aegypti GN=AAEL000801 PE=3 SV=1                                   |
| CCG025595.1 | 2079 | 4  | 29 | 0.08267385 | 0.48763349  | 2.560294199  | Up   | 0.0001072 | 0.00017463 | AAEL013981-PA OS=Aedes aegypti GN=AAEL013981 PE=4 SV=1                                   |
| CCG023310.1 | 1134 | 4  | 29 | 0.15156873 | 0.893994732 | 2.560294199  | Up   | 0.0001072 | 0.00017464 | AAEL009915-PA (Fragment) OS=Aedes aegypti GN=AAEL009915 PE=4 SV=1                        |
| CCG009499.1 | 1586 | 5  | 29 | 0.13546575 | 0.63921187  | 2.238366104  | Up   | 0.0002709 | 0.00043227 | Putative uncharacterized protein OS=Culex quinquefasciatus GN=CpipJ_CPIJ016425 PE=4 SV=1 |
| CCG007414.1 | 1107 | 54 | 29 | 2.09608462 | 0.915799482 | -1.194593303 | Down | 0.0002255 | 0.00036142 | AAEL011573-PA OS=Aedes aegypti GN=AAEL011573 PE=4 SV=1                                   |
| CCG005964.1 | 2058 | 55 | 29 | 1.14836511 | 0.492609342 | -1.221065515 | Down | 0.0001518 | 0.00024549 | AAEL009939-PA OS=Aedes aegypti GN=AAEL009939 PE=4 SV=1                                   |



|             |      |      |    |            |             |              |      |           |           |                                                                                          |
|-------------|------|------|----|------------|-------------|--------------|------|-----------|-----------|------------------------------------------------------------------------------------------|
| CCG019371.1 | 501  | 59   | 29 | 5.06030807 | 2.023532987 | -1.32234885  | Down | 2.96E-05  | 5.02E-05  | AAEL005622-PA OS=Aedes aegypti GN=AAEL005622 PE=4 SV=1                                   |
| CCG006968.1 | 2541 | 61   | 29 | 1.0315442  | 0.398972856 | -1.370443139 | Down | 1.27E-05  | 2.20E-05  | Putative uncharacterized protein OS=Drosophila simulans GN=pol PE=4 SV=1                 |
| CCG019921.1 | 878  | 71   | 29 | 3.47477353 | 1.154658344 | -1.589452921 | Down | 1.39E-07  | 2.65E-07  | AAEL010891-PA OS=Aedes aegypti GN=AAEL010891 PE=4 SV=1                                   |
| CCG017003.1 | 4608 | 73   | 29 | 0.68072713 | 0.220006516 | -1.62953036  | Down | 5.38E-08  | 1.05E-07  | AAEL011867-PA OS=Aedes aegypti GN=AAEL011867 PE=4 SV=1                                   |
| CCG005768.1 | 501  | 74   | 29 | 6.34682707 | 2.023532987 | -1.649159167 | Down | 3.33E-08  | 6.51E-08  | AAEL012131-PA OS=Aedes aegypti GN=AAEL012131 PE=4 SV=1                                   |
| CCG014242.1 | 312  | 96   | 29 | 13.2214568 | 3.249327008 | -2.024668302 | Down | 3.95E-13  | 1.05E-12  | -                                                                                        |
| CCG016073.1 | 1173 | 100  | 29 | 3.66323398 | 0.864271122 | -2.083561991 | Down | 4.40E-14  | 1.49E-13  | Carboxypeptidase B OS=Aedes aegypti GN=CPB-V PE=2 SV=1                                   |
| CCG002366.1 | 618  | 108  | 29 | 7.50927401 | 1.640436936 | -2.194593303 | Down | 4.94E-16  | 1.81E-15  | AAEL009089-PA OS=Aedes aegypti GN=AAEL009089 PE=4 SV=1                                   |
| CCG013453.1 | 772  | 125  | 29 | 6.95753475 | 1.313199516 | -2.405490086 | Down | 2.42E-20  | 9.49E-20  | AAEL008488-PA OS=Aedes aegypti GN=AAEL008488 PE=4 SV=1                                   |
| CCG016586.1 | 1161 | 167  | 29 | 6.18083177 | 0.873204157 | -2.823410094 | Down | 1.08E-31  | 4.58E-31  | Alcohol dehydrogenase z OS=Culex quinquefasciatus GN=CpipJ_CPIJ016721 PE=4 SV=1          |
| CCG017191.1 | 1236 | 176  | 29 | 6.11866771 | 0.820218468 | -2.89913742  | Down | 3.17E-34  | 1.37E-33  | -                                                                                        |
| CCG007946.1 | 1412 | 191  | 29 | 5.81247827 | 0.717981605 | -3.017134629 | Down | 1.67E-38  | 7.40E-38  | AAEL011928-PA OS=Aedes aegypti GN=AAEL011928 PE=4 SV=1                                   |
| CCG021522.1 | 648  | 275  | 29 | 18.2356127 | 1.564490781 | -3.542993609 | Down | 1.80E-63  | 8.77E-63  | AAEL000609-PA OS=Aedes aegypti GN=AAEL000609 PE=4 SV=1                                   |
| CCG028648.1 | 720  | 346  | 29 | 20.6493447 | 1.408041703 | -3.874334029 | Down | 1.91E-85  | 9.81E-85  | AAEL002780-PA OS=Aedes aegypti GN=AAEL002780 PE=4 SV=1                                   |
| CCG008951.2 | 1860 | 472  | 29 | 10.9041477 | 0.545048401 | -4.32234885  | Down | 1.48E-125 | 8.16E-125 | Putative uncharacterized protein OS=Culex quinquefasciatus GN=CpipJ_CPIJ001238 PE=4 SV=1 |
| CCG025962.1 | 3201 | 2197 | 29 | 29.4921921 | 0.316710411 | -6.541024955 | Down | 0         | 0         | AAEL004897-PA OS=Aedes aegypti GN=AAEL004897 PE=4 SV=1                                   |

|             |      |       |    |            |             |              |      |           |            |                                                                                                                   |
|-------------|------|-------|----|------------|-------------|--------------|------|-----------|------------|-------------------------------------------------------------------------------------------------------------------|
| CCG022421.1 | 3831 | 37727 | 29 | 423.15823  | 0.264628041 | -10.64301556 | Down | 0         | 0          | Uncharacterized protein<br>OS=Anopheles darlingi<br>GN=AND_08282 PE=4 SV=1                                        |
| CCG023174.1 | 1140 | 0     | 30 | 0.001      | 0.919954652 | 9.845418937  | Up   | 1.93E-08  | 3.82E-08   | Yellow-g OS=Culex<br>quinquefasciatus<br>GN=CpipJ_CPIJ008961 PE=4<br>SV=1                                         |
| CCG006327.1 | 537  | 1     | 30 | 0.08001813 | 1.952976356 | 4.609203799  | Up   | 0.0005873 | 0.00091501 | AAEL007972-PA OS=Aedes<br>aegypti GN=AAEL007972 PE=3<br>SV=1                                                      |
| CCG025091.1 | 1446 | 1     | 30 | 0.02971628 | 0.725275452 | 4.609203799  | Up   | 0.0005873 | 0.0009149  | AAEL012230-PA OS=Aedes<br>aegypti GN=AAEL012230 PE=4<br>SV=1                                                      |
| CCG016472.1 | 873  | 1     | 30 | 0.04922077 | 1.201315353 | 4.609203799  | Up   | 0.0005873 | 0.00091495 | AAEL004584-PA OS=Aedes<br>aegypti GN=AAEL004584 PE=4<br>SV=1                                                      |
| CCG012380.1 | 966  | 2     | 30 | 0.08896425 | 1.085660769 | 3.609203799  | Up   | 9.58E-05  | 0.00015639 | AAEL014506-PA (Fragment)<br>OS=Aedes aegypti<br>GN=AAEL014506 PE=4 SV=1                                           |
| CCG020165.1 | 537  | 2     | 30 | 0.16003626 | 1.952976356 | 3.609203799  | Up   | 9.58E-05  | 0.00015638 | AAEL006623-PA OS=Aedes<br>aegypti GN=AAEL006623 PE=4<br>SV=1                                                      |
| CCG020232.2 | 777  | 4     | 30 | 0.22120841 | 1.349740416 | 2.609203799  | Up   | 7.76E-05  | 0.00012835 | Uncharacterized protein<br>OS=Anopheles darlingi<br>GN=AND_02384 PE=4 SV=1                                        |
| CCG001244.1 | 942  | 4     | 30 | 0.18246172 | 1.113320916 | 2.609203799  | Up   | 7.76E-05  | 0.00012834 | AAEL005554-PA OS=Aedes<br>aegypti GN=AAEL005554 PE=4<br>SV=1                                                      |
| CCG005434.1 | 484  | 4     | 30 | 0.35512177 | 2.166835337 | 2.609203799  | Up   | 7.76E-05  | 0.00012833 | -                                                                                                                 |
| CCG017071.1 | 1341 | 5     | 30 | 0.16021527 | 0.782064357 | 2.287275705  | Up   | 0.0001781 | 0.00028698 | AAEL009669-PA OS=Aedes<br>aegypti GN=AAEL009669 PE=4<br>SV=1                                                      |
| CCG005622.1 | 2325 | 6     | 30 | 0.11088964 | 0.451074539 | 2.024241299  | Up   | 0.0004776 | 0.00075159 | Translation initiation factor IF-2<br>OS=Wolbachia endosymbiont of<br>Muscidifurax uniraptor GN=infB<br>PE=3 SV=1 |
| CCG000867.1 | 673  | 57    | 30 | 3.63933859 | 1.55831843  | -1.223686215 | Down | 0.0001119 | 0.00018216 | AAEL000532-PA OS=Aedes<br>aegypti GN=AAEL000532 PE=4<br>SV=1                                                      |
| CCG026655.1 | 1329 | 58    | 30 | 1.87527811 | 0.789125887 | -1.248777196 | Down | 7.49E-05  | 0.00012405 | AAEL009943-PA OS=Aedes<br>aegypti GN=AAEL009943 PE=4<br>SV=1                                                      |
| CCG012313.1 | 804  | 62    | 30 | 3.3135865  | 1.304413312 | -1.344992511 | Down | 1.43E-05  | 2.49E-05   | GK19301 OS=Drosophila willistoni<br>GN=GK19301 PE=4 SV=1                                                          |

|             |      |     |    |            |             |              |      |           |           |                                                                                          |
|-------------|------|-----|----|------------|-------------|--------------|------|-----------|-----------|------------------------------------------------------------------------------------------|
| CCG006788.1 | 369  | 68  | 30 | 7.91854188 | 2.842136323 | -1.478259042 | Down | 1.04E-06  | 1.92E-06  | AAEL010909-PA OS=Aedes aegypti GN=AAEL010909 PE=4 SV=1                                   |
| CCG028473.1 | 2265 | 74  | 30 | 1.40386771 | 0.463023533 | -1.600249566 | Down | 6.52E-08  | 1.26E-07  | Ribbon OS=Culex quinquefasciatus GN=CripJ_CPIJ004725 PE=4 SV=1                           |
| CCG003896.1 | 432  | 77  | 30 | 7.65895733 | 2.427658109 | -1.657582741 | Down | 1.55E-08  | 3.07E-08  | AAEL014559-PA OS=Aedes aegypti GN=AAEL014559 PE=4 SV=1                                   |
| CCG023695.1 | 1095 | 78  | 30 | 3.06085781 | 0.957761007 | -1.676198419 | Down | 9.56E-09  | 1.91E-08  | AAEL006696-PA OS=Aedes aegypti GN=AAEL006696 PE=3 SV=1                                   |
| CCG014313.1 | 1488 | 84  | 30 | 2.42571082 | 0.704803967 | -1.783113623 | Down | 4.87E-10  | 1.01E-09  | Putative uncharacterized protein OS=Culex quinquefasciatus GN=CpipJ_CPIJ004725 PE=4 SV=1 |
| CCG023861.1 | 348  | 85  | 30 | 10.4954812 | 3.013644549 | -1.800187137 | Down | 2.94E-10  | 6.17E-10  | Uncharacterized protein OS=Anopheles darlingi GN=AND_09992 PE=3 SV=1                     |
| CCG026650.1 | 623  | 100 | 30 | 6.89722867 | 1.683384114 | -2.03465239  | Down | 1.07E-13  | 3.34E-13  | -                                                                                        |
| CCG019646.1 | 1880 | 103 | 30 | 2.35419291 | 0.557844842 | -2.077296728 | Down | 2.06E-14  | 7.23E-14  | AGAP005356-PA OS=Anopheles gambiae GN=AGAP005356 PE=4 SV=1                               |
| CCG006146.1 | 452  | 106 | 30 | 10.0769732 | 2.320239609 | -2.118716655 | Down | 3.90E-15  | 1.41E-14  | -                                                                                        |
| CCG004915.1 | 2007 | 119 | 30 | 2.54778197 | 0.522545243 | -2.285613964 | Down | 2.36E-18  | 9.04E-18  | AAEL014044-PA OS=Aedes aegypti GN=AAEL014044 PE=4 SV=1                                   |
| CCG006110.1 | 1155 | 145 | 30 | 5.39446885 | 0.908007189 | -2.570705291 | Down | 3.95E-25  | 1.61E-24  | AAEL013864-PA OS=Aedes aegypti GN=AAEL013864 PE=4 SV=1                                   |
| CCG008124.1 | 1164 | 177 | 30 | 6.53405758 | 0.900986515 | -2.858401751 | Down | 6.35E-34  | 2.73E-33  | Putative uncharacterized protein OS=Culex quinquefasciatus GN=CpipJ_CPIJ005093 PE=4 SV=1 |
| CCG026707.1 | 1284 | 193 | 30 | 6.4588464  | 0.816782168 | -2.983253238 | Down | 1.84E-38  | 8.13E-38  | AAEL013109-PA OS=Aedes aegypti GN=AAEL013109 PE=4 SV=1                                   |
| CCG016529.1 | 1044 | 242 | 30 | 9.96041741 | 1.004548183 | -3.309659438 | Down | 8.60E-53  | 4.06E-52  | AAEL008496-PA OS=Aedes aegypti GN=AAEL008496 PE=4 SV=1                                   |
| CCG005396.1 | 1230 | 333 | 30 | 11.6332696 | 0.852640897 | -3.770174568 | Down | 1.49E-80  | 7.58E-80  | AAEL010597-PA OS=Aedes aegypti GN=AAEL010597 PE=3 SV=1                                   |
| CCG007817.1 | 924  | 534 | 30 | 24.8331583 | 1.135008986 | -4.451492132 | Down | 1.28E-144 | 7.21E-144 | AAEL012245-PA OS=Aedes aegypti GN=AAEL012245 PE=4 SV=1                                   |

|             |      |   |    |            |             |             |    |           |            |                                                                                          |
|-------------|------|---|----|------------|-------------|-------------|----|-----------|------------|------------------------------------------------------------------------------------------|
| CCG010581.1 | 459  | 0 | 31 | 0.001      | 2.361016514 | 11.20519242 | Up | 1.07E-08  | 2.13E-08   | AAEL007592-PA OS=Aedes aegypti GN=AAEL007592 PE=4 SV=1                                   |
| CCG004919.1 | 825  | 0 | 31 | 0.001      | 1.313583733 | 10.35929245 | Up | 1.07E-08  | 2.13E-08   | AAEL002196-PA OS=Aedes aegypti GN=AAEL002196 PE=4 SV=1                                   |
| CCG024005.1 | 1296 | 0 | 31 | 0.001      | 0.836193349 | 9.707692758 | Up | 1.07E-08  | 2.13E-08   | Putative uncharacterized protein OS=Culex quinquefasciatus GN=CpipJ_CPIJ005433 PE=4 SV=1 |
| CCG006728.1 | 1506 | 1 | 31 | 0.02853236 | 0.719592683 | 4.656509514 | Up | 0.0005871 | 0.00091487 | Putative uncharacterized protein OS=Culex quinquefasciatus GN=CpipJ_CPIJ006292 PE=4 SV=1 |
| CCG022573.1 | 417  | 1 | 31 | 0.10304493 | 2.598816738 | 4.656509514 | Up | 0.0005871 | 0.00091493 | AAEL001539-PA (Fragment) OS=Aedes aegypti GN=AAEL001539 PE=4 SV=1                        |
| CCG010828.1 | 447  | 2 | 31 | 0.19225832 | 2.424399508 | 3.656509514 | Up | 9.48E-05  | 0.0001549  | AAEL001249-PA OS=Aedes aegypti GN=AAEL001249 PE=4 SV=1                                   |
| CCG010000.1 | 552  | 2 | 31 | 0.15568744 | 1.963236558 | 3.656509514 | Up | 9.48E-05  | 0.00015492 | AAEL009184-PA OS=Aedes aegypti GN=AAEL009184 PE=4 SV=1                                   |
| CCG013140.1 | 192  | 2 | 31 | 0.4476014  | 5.644305104 | 3.656509514 | Up | 9.48E-05  | 0.00015493 | Gambicin OS=Aedes triseriatus PE=4 SV=1                                                  |
| CCG000074.1 | 1434 | 2 | 31 | 0.05992989 | 0.755722859 | 3.656509514 | Up | 9.48E-05  | 0.00015491 | -                                                                                        |
| CCG010385.1 | 3978 | 3 | 31 | 0.03240553 | 0.272424982 | 3.071547013 | Up | 5.99E-05  | 9.96E-05   | AAEL009849-PA OS=Aedes aegypti GN=AAEL009849 PE=4 SV=1                                   |
| CCG000796.1 | 2115 | 4 | 31 | 0.08126664 | 0.512390818 | 2.656509514 | Up | 5.92E-05  | 9.86E-05   | AAEL007648-PA OS=Aedes aegypti GN=AAEL007648 PE=4 SV=1                                   |
| CCG002369.1 | 804  | 4 | 31 | 0.21377977 | 1.347893756 | 2.656509514 | Up | 5.92E-05  | 9.86E-05   | AAEL007626-PA OS=Aedes aegypti GN=GNBPA1 PE=4 SV=2                                       |
| CCG006024.1 | 2122 | 5 | 31 | 0.1012482  | 0.510700556 | 2.334581419 | Up | 0.0001187 | 0.00019301 | Putative uncharacterized protein OS=Medicago truncatula GN=MTR_2g061140 PE=4 SV=1        |
| CCG019295.1 | 980  | 5 | 31 | 0.21923334 | 1.105823041 | 2.334581419 | Up | 0.0001187 | 0.00019298 | -                                                                                        |
| CCG005659.1 | 663  | 5 | 31 | 0.32405531 | 1.634549894 | 2.334581419 | Up | 0.0001187 | 0.00019299 | AAEL013352-PA OS=Aedes aegypti GN=AAEL013352 PE=3 SV=1                                   |
| CCG009410.1 | 534  | 5 | 31 | 0.40233834 | 2.029413071 | 2.334581419 | Up | 0.0001187 | 0.000193   | -                                                                                        |
| CCG014092.1 | 469  | 6 | 31 | 0.54971942 | 2.310675011 | 2.071547013 | Up | 0.0003132 | 0.00049768 | AAEL004644-PA OS=Aedes aegypti GN=AAEL004644 PE=4 SV=1                                   |

|             |      |     |    |            |             |              |      |           |            |                                                                                           |
|-------------|------|-----|----|------------|-------------|--------------|------|-----------|------------|-------------------------------------------------------------------------------------------|
| CCG028547.1 | 1173 | 6   | 31 | 0.21979404 | 0.923876027 | 2.071547013  | Up   | 0.0003132 | 0.00049761 | AAEL009178-PA OS=Aedes aegypti GN=GNBPB4 PE=4 SV=1                                        |
| CCG004165.1 | 1752 | 6   | 31 | 0.14715663 | 0.618553984 | 2.071547013  | Up   | 0.0003132 | 0.00049765 | AAEL010537-PA OS=Aedes aegypti GN=AAEL010537 PE=4 SV=1                                    |
| CCG008731.1 | 1654 | 6   | 31 | 0.1558757  | 0.655203495 | 2.071547013  | Up   | 0.0003132 | 0.00049771 | Reverse transcriptase OS=Anopheles gambiae PE=4 SV=1                                      |
| CCG028077.1 | 918  | 64  | 31 | 2.99571135 | 1.180508257 | -1.343490486 | Down | 1.06E-05  | 1.85E-05   | AGAP004169-PA OS=Anopheles gambiae GN=AgaP_AGAP004169 PE=4 SV=4                           |
| CCG011806.1 | 1704 | 65  | 31 | 1.63910373 | 0.63597804  | -1.365858299 | Down | 6.92E-06  | 1.22E-05   | AAEL005002-PA OS=Aedes aegypti GN=AAEL005002 PE=4 SV=1                                    |
| CCG014499.1 | 1362 | 67  | 31 | 2.11378283 | 0.795672966 | -1.409579676 | Down | 2.92E-06  | 5.25E-06   | AAEL006350-PA OS=Aedes aegypti GN=AAEL006350 PE=4 SV=1                                    |
| CCG005483.1 | 272  | 69  | 31 | 10.9004106 | 3.984215367 | -1.452014943 | Down | 1.21E-06  | 2.22E-06   | -                                                                                         |
| CCG028443.1 | 2277 | 72  | 31 | 1.35872679 | 0.475936135 | -1.513415487 | Down | 3.13E-07  | 5.88E-07   | AAEL014543-PA OS=Aedes aegypti GN=AAEL014543 PE=4 SV=1                                    |
| CCG027384.1 | 1989 | 72  | 31 | 1.55546551 | 0.544849965 | -1.513415487 | Down | 3.13E-07  | 5.88E-07   | AAEL001050-PA OS=Aedes aegypti GN=AAEL001050 PE=4 SV=1                                    |
| CCG025410.1 | 1236 | 77  | 31 | 2.67691712 | 0.876785259 | -1.610277026 | Down | 3.05E-08  | 6.00E-08   | Estradiol 17-beta-dehydrogenase 2 OS=Culex quinquefasciatus GN=CpipJ_CPIJ011409 PE=4 SV=1 |
| CCG024929.1 | 2913 | 84  | 31 | 1.23908606 | 0.372024229 | -1.735807909 | Down | 1.02E-09  | 2.10E-09   | Putative uncharacterized protein OS=Culex quinquefasciatus GN=CpipJ_CPIJ003554 PE=4 SV=1  |
| CCG009166.1 | 813  | 84  | 31 | 4.43967738 | 1.332972423 | -1.735807909 | Down | 1.02E-09  | 2.10E-09   | AAEL008596-PA OS=Aedes aegypti GN=SPZ3A PE=4 SV=1                                         |
| CCG014366.1 | 1195 | 85  | 31 | 3.05642464 | 0.906867431 | -1.752881422 | Down | 6.19E-10  | 1.29E-09   | -                                                                                         |
| CCG009242.1 | 525  | 111 | 31 | 9.0850296  | 2.064203009 | -2.137906352 | Down | 6.00E-16  | 2.19E-15   | Predicted protein OS=Culex quinquefasciatus GN=CpipJ_CPIJ010048 PE=4 SV=1                 |
| CCG017506.1 | 1113 | 114 | 31 | 4.40121271 | 0.973680665 | -2.1763805   | Down | 1.11E-16  | 4.17E-16   | AAEL004150-PA OS=Aedes aegypti GN=AAEL004150 PE=4 SV=1                                    |
| CCG007548.1 | 1259 | 114 | 31 | 3.89082585 | 0.860767736 | -2.1763805   | Down | 1.11E-16  | 4.17E-16   | -                                                                                         |

|             |      |      |    |            |             |              |      |           |            |                                                                                          |
|-------------|------|------|----|------------|-------------|--------------|------|-----------|------------|------------------------------------------------------------------------------------------|
| CCG005611.1 | 558  | 121  | 31 | 9.31780984 | 1.942126487 | -2.262353723 | Down | 2.02E-18  | 7.74E-18   | AAEL001868-PA OS=Aedes aegypti GN=AAEL001868 PE=4 SV=1                                   |
| CCG024433.1 | 1434 | 126  | 31 | 3.77558338 | 0.755722859 | -2.320770409 | Down | 1.10E-19  | 4.27E-19   | AAEL011332-PA OS=Aedes aegypti GN=AAEL011332 PE=4 SV=1                                   |
| CCG000626.1 | 1515 | 151  | 31 | 4.28279203 | 0.715317875 | -2.581895225 | Down | 3.14E-26  | 1.29E-25   | AAEL003516-PA OS=Aedes aegypti GN=AAEL003516 PE=4 SV=1                                   |
| CCG025179.1 | 574  | 153  | 31 | 11.4536052 | 1.887990557 | -2.600878328 | Down | 9.10E-27  | 3.76E-26   | AAEL013387-PA OS=Aedes aegypti GN=AAEL013387 PE=4 SV=1                                   |
| CCG006666.1 | 897  | 203  | 31 | 9.72447729 | 1.208145574 | -3.008826403 | Down | 1.03E-40  | 4.59E-40   | AAEL010866-PA OS=Aedes aegypti GN=AAEL010866 PE=3 SV=1                                   |
| CCG009432.1 | 1161 | 394  | 31 | 14.5823217 | 0.933425133 | -3.965542305 | Down | 8.11E-99  | 4.29E-98   | AAEL013452-PA OS=Aedes aegypti GN=AAEL013452 PE=4 SV=1                                   |
| CCG025065.1 | 2145 | 559  | 31 | 11.1981733 | 0.505224513 | -4.470194959 | Down | 1.01E-151 | 5.72E-151  | AAEL011310-PA OS=Aedes aegypti GN=AAEL011310 PE=4 SV=1                                   |
| CCG022702.1 | 3417 | 912  | 31 | 11.4686561 | 0.317151472 | -5.1763805   | Down | 3.44E-268 | 2.14E-267  | GH13316 OS=Drosophila grimshawi GN=GH13316 PE=4 SV=1                                     |
| CCG018020.1 | 1857 | 2706 | 31 | 62.6150252 | 0.583579203 | -6.74543661  | Down | 0         | 0          | AAEL012090-PA OS=Aedes aegypti GN=AAEL012090 PE=4 SV=1                                   |
| CCG001623.1 | 426  | 0    | 32 | 0.001      | 2.625973842 | 11.35863683  | Up   | 5.88E-09  | 1.18E-08   | AAEL000262-PA OS=Aedes aegypti GN=AAEL000262 PE=4 SV=1                                   |
| CCG014440.1 | 435  | 0    | 32 | 0.001      | 2.571643349 | 11.32847486  | Up   | 5.88E-09  | 1.18E-08   | -                                                                                        |
| CCG021787.1 | 636  | 0    | 32 | 0.001      | 1.758907007 | 10.78046349  | Up   | 5.88E-09  | 1.18E-08   | AAEL009165-PA OS=Aedes aegypti GN=AAEL009165 PE=4 SV=1                                   |
| CCG014354.1 | 1112 | 0    | 32 | 0.001      | 1.005993576 | 9.974405377  | Up   | 5.88E-09  | 1.18E-08   | U3 small nucleolar ribonucleoprotein component OS=Aedes aegypti PE=2 SV=1                |
| CCG001791.1 | 1155 | 0    | 32 | 0.001      | 0.968541001 | 9.919669314  | Up   | 5.88E-09  | 1.18E-08   | Putative uncharacterized protein OS=Culex quinquefasciatus GN=CpipJ_CPIJ010663 PE=4 SV=1 |
| CCG023317.1 | 1275 | 0    | 32 | 0.001      | 0.877384201 | 9.777064918  | Up   | 5.88E-09  | 1.18E-08   | AAEL002882-PA OS=Aedes aegypti GN=AAEL002882 PE=4 SV=1                                   |
| CCG002198.1 | 561  | 1    | 32 | 0.07659489 | 1.994055003 | 4.702313204  | Up   | 0.0005871 | 0.00091488 | AAEL008337-PA OS=Aedes aegypti GN=AAEL008337 PE=4 SV=1                                   |

|             |      |     |    |            |             |              |      |           |            |                                                                                          |
|-------------|------|-----|----|------------|-------------|--------------|------|-----------|------------|------------------------------------------------------------------------------------------|
| CCG013649.1 | 2117 | 2   | 32 | 0.04059493 | 0.528419866 | 3.702313204  | Up   | 9.43E-05  | 0.00015411 | AAEL010730-PA OS=Aedes aegypti GN=AAEL010730 PE=4 SV=1                                   |
| CCG026885.1 | 1275 | 2   | 32 | 0.06740351 | 0.877384201 | 3.702313204  | Up   | 9.43E-05  | 0.00015409 | AAEL014814-PA OS=Aedes aegypti GN=AAEL014814 PE=4 SV=1                                   |
| CCG007709.1 | 683  | 2   | 32 | 0.12582646 | 1.637869483 | 3.702313204  | Up   | 9.43E-05  | 0.00015408 | Uncharacterized protein OS=Anopheles darlingi GN=AND_08768 PE=4 SV=1                     |
| CCG028224.1 | 1078 | 2   | 32 | 0.07972121 | 1.037722502 | 3.702313204  | Up   | 9.43E-05  | 0.0001541  | -                                                                                        |
| CCG025484.1 | 1205 | 3   | 32 | 0.10697859 | 0.928352578 | 3.117350703  | Up   | 5.70E-05  | 9.50E-05   | Putative uncharacterized protein OS=Aedes aegypti PE=4 SV=1                              |
| CCG011647.1 | 651  | 3   | 32 | 0.19801721 | 1.718379196 | 3.117350703  | Up   | 5.70E-05  | 9.50E-05   | -                                                                                        |
| CCG015393.1 | 1394 | 4   | 32 | 0.1232991  | 0.80248555  | 2.702313204  | Up   | 4.78E-05  | 8.03E-05   | Putative uncharacterized protein OS=Tribolium castaneum GN=TcasGA2_TC004048 PE=4 SV=1    |
| CCG009487.1 | 576  | 4   | 32 | 0.29840093 | 1.942126487 | 2.702313204  | Up   | 4.78E-05  | 8.03E-05   | -                                                                                        |
| CCG023152.1 | 484  | 5   | 32 | 0.44390222 | 2.311291026 | 2.380385109  | Up   | 8.08E-05  | 0.00013332 | AAEL006533-PA OS=Aedes aegypti GN=AAEL006533 PE=3 SV=1                                   |
| CCG003431.1 | 831  | 6   | 32 | 0.31025079 | 1.346167096 | 2.117350703  | Up   | 0.0002055 | 0.00033027 | -                                                                                        |
| CCG013012.1 | 966  | 6   | 32 | 0.26689276 | 1.158038154 | 2.117350703  | Up   | 0.0002055 | 0.00033025 | AAEL000801-PA OS=Aedes aegypti GN=AAEL000801 PE=3 SV=1                                   |
| CCG024967.1 | 813  | 7   | 32 | 0.36997311 | 1.375971533 | 1.894958282  | Up   | 0.0005322 | 0.00083474 | AAEL004999-PA OS=Aedes aegypti GN=AAEL004999 PE=4 SV=1                                   |
| CCG013406.1 | 1425 | 60  | 32 | 1.80925198 | 0.78502797  | -1.204577392 | Down | 9.04E-05  | 0.00014894 | AAEL004576-PA OS=Aedes aegypti GN=AAEL004576 PE=4 SV=1                                   |
| CCG004594.1 | 699  | 71  | 32 | 4.36459393 | 1.600378908 | -1.447433916 | Down | 8.98E-07  | 1.66E-06   | AAEL006932-PA OS=Aedes aegypti GN=AAEL006932 PE=4 SV=1                                   |
| CCG021518.1 | 1018 | 72  | 32 | 3.03911679 | 1.098884928 | -1.467611798 | Down | 5.76E-07  | 1.07E-06   | Putative uncharacterized protein OS=Culex quinquefasciatus GN=CpipJ_CPIJ017997 PE=4 SV=1 |
| CCG009624.2 | 1528 | 80  | 32 | 2.24972433 | 0.732110508 | -1.619614891 | Down | 1.43E-08  | 2.84E-08   | -                                                                                        |
| CCG002432.1 | 1065 | 94  | 32 | 3.79263385 | 1.050389537 | -1.852275648 | Down | 1.36E-11  | 3.01E-11   | -                                                                                        |
| CCG028524.1 | 2751 | 115 | 32 | 1.79626299 | 0.406639352 | -2.143176847 | Down | 1.62E-16  | 6.07E-16   | AAEL000025-PA OS=Aedes aegypti GN=AAEL000025 PE=3 SV=1                                   |

|             |      |      |    |            |             |              |      |          |            |                                                                                          |
|-------------|------|------|----|------------|-------------|--------------|------|----------|------------|------------------------------------------------------------------------------------------|
| CCG002970.1 | 742  | 122  | 32 | 7.06510461 | 1.507634578 | -2.228424134 | Down | 3.04E-18 | 1.17E-17   | AAEL009705-PA OS=Aedes aegypti GN=AAEL009705 PE=4 SV=1                                   |
| CCG027792.1 | 459  | 141  | 32 | 13.1998531 | 2.437178337 | -2.437238149 | Down | 4.32E-23 | 1.73E-22   | AAEL005291-PA OS=Aedes aegypti GN=AAEL003291 PE=4 SV=1                                   |
| CCG026373.1 | 1926 | 164  | 32 | 3.65889744 | 0.580822875 | -2.655238801 | Down | 3.19E-29 | 1.34E-28   | AAEL006339-PA OS=Aedes aegypti GN=AAEL006339 PE=4 SV=1                                   |
| CCG027459.1 | 1323 | 205  | 32 | 6.65819773 | 0.845551668 | -2.977166896 | Down | 1.12E-40 | 5.03E-40   | AAEL001143-PA OS=Aedes aegypti GN=AAEL001143 PE=4 SV=1                                   |
| CCG028291.1 | 744  | 329  | 32 | 19.0014015 | 1.503581797 | -3.65963057  | Down | 1.05E-77 | 5.31E-77   | AAEL014538-PA OS=Aedes aegypti GN=AAEL014538 PE=4 SV=1                                   |
| CCG007212.1 | 1863 | 1189 | 32 | 27.424055  | 0.600464228 | -5.513219796 | Down | 0        | 0          | AAEL012090-PA OS=Aedes aegypti GN=AAEL012090 PE=4 SV=1                                   |
| CCG015090.1 | 2772 | 1806 | 32 | 27.9954332 | 0.403558751 | -6.116268974 | Down | 0        | 0          | AAEL007483-PA OS=Aedes aegypti GN=AAEL007483 PE=4 SV=1                                   |
| CCG007494.1 | 1035 | 0    | 33 | 0.001      | 1.114611723 | 10.12232552  | Up   | 3.24E-09 | 6.60E-09   | AAEL000021-PA OS=Aedes aegypti GN=AAEL000021 PE=4 SV=1                                   |
| CCG005605.1 | 1086 | 0    | 33 | 0.001      | 1.062268079 | 10.05293218  | Up   | 3.24E-09 | 6.60E-09   | AAEL014814-PA OS=Aedes aegypti GN=AAEL014814 PE=4 SV=1                                   |
| CCG008747.1 | 1772 | 0    | 33 | 0.001      | 0.651028856 | 9.346577681  | Up   | 3.24E-09 | 6.60E-09   | Putative uncharacterized protein OS=Culex quinquefasciatus GN=CpipJ_CPIJ014613 PE=4 SV=1 |
| CCG012240.1 | 1478 | 2    | 33 | 0.05814578 | 0.78052986  | 3.746707323  | Up   | 9.40E-05 | 0.00015363 | -                                                                                        |
| CCG016501.1 | 1509 | 2    | 33 | 0.05695127 | 0.764495118 | 3.746707323  | Up   | 9.40E-05 | 0.00015364 | -                                                                                        |
| CCG002108.1 | 288  | 3    | 33 | 0.4476014  | 4.00563588  | 3.161744822  | Up   | 5.53E-05 | 9.22E-05   | -                                                                                        |
| CCG016607.1 | 756  | 3    | 33 | 0.17051482 | 1.525956526 | 3.161744822  | Up   | 5.53E-05 | 9.23E-05   | -                                                                                        |
| CCG021984.1 | 1071 | 4    | 33 | 0.16048454 | 1.077145783 | 2.746707323  | Up   | 4.07E-05 | 6.87E-05   | AAEL007200-PA OS=Aedes aegypti GN=AAEL007200 PE=4 SV=1                                   |
| CCG011705.1 | 1103 | 4    | 33 | 0.15582859 | 1.04589586  | 2.746707323  | Up   | 4.07E-05 | 6.87E-05   | Putative uncharacterized protein OS=Culex quinquefasciatus GN=CpipJ_CPIJ007563 PE=4 SV=1 |
| CCG025576.1 | 1044 | 5    | 33 | 0.20579375 | 1.105003001 | 2.424779228  | Up   | 5.67E-05 | 9.45E-05   | -                                                                                        |
| CCG018538.1 | 265  | 5    | 33 | 0.81074971 | 4.353294843 | 2.424779228  | Up   | 5.67E-05 | 9.46E-05   | -                                                                                        |
| CCG023878.1 | 492  | 5    | 33 | 0.43668429 | 2.344762466 | 2.424779228  | Up   | 5.67E-05 | 9.45E-05   | GK19301 OS=Drosophila willistoni GN=GK19301 PE=4 SV=1                                    |



|             |      |     |    |            |             |              |      |           |            |                                                                                          |
|-------------|------|-----|----|------------|-------------|--------------|------|-----------|------------|------------------------------------------------------------------------------------------|
| CCG007181.1 | 2410 | 6   | 33 | 0.10697859 | 0.478681798 | 2.161744822  | Up   | 0.0001354 | 0.00021952 | Putative finger protein OS=Culex quinquefasciatus GN=CpipJ_CPIJ014131 PE=4 SV=1          |
| CCG008143.1 | 216  | 6   | 33 | 1.19360374 | 5.34084784  | 2.161744822  | Up   | 0.0001354 | 0.00021949 | -                                                                                        |
| CCG022916.1 | 2772 | 6   | 33 | 0.09300808 | 0.416169962 | 2.161744822  | Up   | 0.0001354 | 0.00021951 | AAEL004179-PA OS=Reedes aegypti GN=AAEL004179 PE=4 SV=1                                  |
| CCG002806.1 | 1113 | 6   | 33 | 0.23164277 | 1.036498772 | 2.161744822  | Up   | 0.0001354 | 0.00021953 | -                                                                                        |
| CCG017391.1 | 3627 | 7   | 33 | 0.08293028 | 0.31806538  | 1.939352401  | Up   | 0.0003524 | 0.00055831 | AAEL010391-PA OS=Reedes aegypti GN=AAEL010391 PE=4 SV=1                                  |
| CCG005654.1 | 661  | 7   | 33 | 0.45505014 | 1.745269491 | 1.939352401  | Up   | 0.0003524 | 0.00055834 | -                                                                                        |
| CCG004086.1 | 1571 | 58  | 33 | 1.5864065  | 0.734324082 | -1.111273672 | Down | 0.0003086 | 0.00049053 | AAEL005729-PA OS=Reedes aegypti GN=AAEL005729 PE=4 SV=1                                  |
| CCG020825.1 | 2421 | 64  | 33 | 1.13592029 | 0.476506871 | -1.253292677 | Down | 3.01E-05  | 5.11E-05   | Stopperin OS=Culex quinquefasciatus GN=CpipJ_CPIJ010715 PE=4 SV=1                        |
| CCG019099.1 | 522  | 67  | 33 | 5.51527245 | 2.210006003 | -1.319381867 | Down | 8.79E-06  | 1.54E-05   | AAEL004964-PA OS=Reedes aegypti GN=AAEL004964 PE=4 SV=1                                  |
| CCG011995.1 | 678  | 71  | 33 | 4.49978047 | 1.701509046 | -1.403039796 | Down | 1.60E-06  | 2.92E-06   | -                                                                                        |
| CCG021626.1 | 537  | 73  | 33 | 5.84132333 | 2.148273992 | -1.443117236 | Down | 6.67E-07  | 1.24E-06   | AAEL004466-PA OS=Reedes aegypti GN=AAEL004466 PE=4 SV=1                                  |
| CCG015302.1 | 885  | 79  | 33 | 3.83571642 | 1.303528964 | -1.557073425 | Down | 4.40E-08  | 8.58E-08   | AAEL011901-PA OS=Reedes aegypti GN=AAEL011901 PE=4 SV=1                                  |
| CCG020331.1 | 756  | 80  | 33 | 4.54706186 | 1.525956526 | -1.575220772 | Down | 2.76E-08  | 5.43E-08   | Galactose-specific G-type lectin OS=Culex quinquefasciatus GN=CpipJ_CPIJ017075 PE=4 SV=1 |
| CCG013640.1 | 1236 | 89  | 33 | 3.09409901 | 0.93335205  | -1.729026108 | Down | 3.62E-10  | 7.60E-10   | AAEL009967-PA OS=Reedes aegypti GN=AAEL009967 PE=4 SV=1                                  |
| CCG008954.1 | 921  | 102 | 33 | 4.75886312 | 1.252576692 | -1.925718019 | Down | 4.65E-13  | 1.21E-12   | AAEL010201-PA OS=Reedes aegypti GN=AAEL010201 PE=4 SV=1                                  |
| CCG021748.1 | 1542 | 105 | 33 | 2.92595469 | 0.748134328 | -1.967538194 | Down | 9.44E-14  | 2.97E-13   | GE21538 OS=Drosophila yakuba GN=GE21538 PE=4 SV=1                                        |
| CCG020258.1 | 1410 | 107 | 33 | 3.26082383 | 0.818172435 | -1.994759663 | Down | 3.23E-14  | 1.12E-13   | Putative uncharacterized protein OS=Culex quinquefasciatus GN=CpipJ_CPIJ001097 PE=4 SV=1 |

|             |      |      |    |            |             |              |      |           |            |                                                                                          |
|-------------|------|------|----|------------|-------------|--------------|------|-----------|------------|------------------------------------------------------------------------------------------|
| CCG025998.1 | 3240 | 115  | 33 | 1.52516033 | 0.356056523 | -2.098782728 | Down | 4.06E-16  | 1.52E-15   | AAEL009780-PA OS=Aedes aegypti GN=AAEL009780 PE=3 SV=1                                   |
| CCG008761.1 | 1413 | 119  | 33 | 3.61882408 | 0.816435339 | -2.14811044  | Down | 4.35E-17  | 1.65E-16   | AAEL001680-PA OS=Aedes aegypti GN=AAEL001680 PE=4 SV=1                                   |
| CCG020607.1 | 549  | 133  | 33 | 10.40979   | 2.101317183 | -2.308575112 | Down | 1.42E-20  | 5.57E-20   | AAEL000455-PA OS=Aedes aegypti GN=AAEL000455 PE=4 SV=1                                   |
| CCG008910.1 | 1293 | 145  | 33 | 4.81872507 | 0.8922066   | -2.433201767 | Down | 1.17E-23  | 4.68E-23   | AAEL005959-PA OS=Aedes aegypti GN=AAEL005959 PE=4 SV=1                                   |
| CCG015218.1 | 2220 | 152  | 33 | 2.94207192 | 0.51965006  | -2.50122019  | Down | 1.70E-25  | 6.93E-25   | Putative uncharacterized protein OS=Culex quinquefasciatus GN=CpipJ_CPIJ013977 PE=4 SV=1 |
| CCG002479.1 | 2613 | 206  | 33 | 3.38758719 | 0.441493737 | -2.939793204 | Down | 2.34E-40  | 1.05E-39   | AAEL000334-PA OS=Aedes aegypti GN=AAEL000334 PE=4 SV=1                                   |
| CCG005970.1 | 1076 | 261  | 33 | 10.4229561 | 1.072140459 | -3.281198673 | Down | 2.29E-56  | 1.09E-55   | Putative uncharacterized protein OS=Culex quinquefasciatus GN=CpipJ_CPIJ014232 PE=4 SV=1 |
| CCG000177.1 | 381  | 349  | 33 | 39.360728  | 3.02788224  | -3.700375903 | Down | 4.41E-83  | 2.25E-82   | AAEL002231-PA OS=Aedes aegypti GN=AAEL002231 PE=4 SV=1                                   |
| CCG008170.1 | 915  | 864  | 33 | 40.5747002 | 1.26079031  | -5.008180179 | Down | 7.94E-250 | 4.88E-249  | AAEL012292-PA OS=Aedes aegypti GN=AAEL012292 PE=4 SV=1                                   |
| CCG017079.1 | 954  | 1530 | 33 | 68.9137253 | 1.209248568 | -5.832608614 | Down | 0         | 0          | AAEL013222-PA OS=Aedes aegypti GN=AAEL013222 PE=4 SV=1                                   |
| CCG016456.1 | 627  | 3775 | 33 | 258.709327 | 1.839909304 | -7.135553606 | Down | 0         | 0          | Putative uncharacterized protein OS=Culex quinquefasciatus GN=CpipJ_CPIJ015249 PE=4 SV=1 |
| CCG019284.1 | 577  | 0    | 34 | 0.001      | 2.05993312  | 11.00838178  | Up   | 1.79E-09  | 3.66E-09   | Histone H2B OS=Aedes aegypti GN=AAEL015682 PE=3 SV=1                                     |
| CCG004071.1 | 1275 | 0    | 34 | 0.001      | 0.932220714 | 9.86452776   | Up   | 1.79E-09  | 3.66E-09   | Putative uncharacterized protein OS=Culex quinquefasciatus GN=CpipJ_CPIJ012792 PE=4 SV=1 |
| CCG013348.1 | 1317 | 0    | 34 | 0.001      | 0.90249158  | 9.817769661  | Up   | 1.79E-09  | 3.66E-09   | Putative uncharacterized protein OS=Culex quinquefasciatus GN=CpipJ_CPIJ005075 PE=4 SV=1 |
| CCG000691.1 | 594  | 1    | 34 | 0.07233962 | 2.000978805 | 4.789776045  | Up   | 0.000587  | 0.00091495 | AAEL003775-PA OS=Aedes aegypti GN=AAEL003775 PE=4 SV=1                                   |

|             |      |   |    |            |             |             |    |          |            |                                                                                        |
|-------------|------|---|----|------------|-------------|-------------|----|----------|------------|----------------------------------------------------------------------------------------|
| CCG019071.1 | 282  | 1 | 34 | 0.15237495 | 4.214827696 | 4.789776045 | Up | 0.000587 | 0.00091484 | AAEL008863-PA OS=Aedes aegypti GN=AAEL008863 PE=4 SV=1                                 |
| CCG007916.1 | 2372 | 1 | 34 | 0.0181154  | 0.501088284 | 4.789776045 | Up | 0.000587 | 0.00091489 | Putative uncharacterized protein OS=Caenorhabditis remanei GN=CRE_08209 PE=4 SV=1      |
| CCG023021.1 | 490  | 1 | 34 | 0.08769334 | 2.425676347 | 4.789776045 | Up | 0.000587 | 0.00091501 | AAEL010576-PA OS=Aedes aegypti GN=AAEL010576 PE=4 SV=1                                 |
| CCG004719.1 | 4358 | 2 | 34 | 0.01971993 | 0.272735523 | 3.789776045 | Up | 9.38E-05 | 0.00015339 | Putative uncharacterized protein 882 (3' region) (Fragment) OS=Aedes aegypti PE=4 SV=1 |
| CCG011553.1 | 489  | 2 | 34 | 0.17574534 | 2.430636831 | 3.789776045 | Up | 9.38E-05 | 0.00015337 | AAEL000913-PA OS=Aedes aegypti GN=AAEL000913 PE=4 SV=1                                 |
| CCG007384.1 | 1573 | 2 | 34 | 0.05463412 | 0.755614374 | 3.789776045 | Up | 9.38E-05 | 0.00015338 | AAEL006747-PA OS=Aedes aegypti GN=AAEL006747 PE=4 SV=1                                 |
| CCG016872.1 | 2110 | 2 | 34 | 0.04072961 | 0.563308725 | 3.789776045 | Up | 9.38E-05 | 0.00015335 | Uncharacterized protein OS=Anopheles darlingi GN=AND_11211 PE=4 SV=1                   |
| CCG020376.1 | 456  | 2 | 34 | 0.18846375 | 2.60653818  | 3.789776045 | Up | 9.38E-05 | 0.0001534  | -                                                                                      |
| CCG028479.1 | 1011 | 2 | 34 | 0.08500442 | 1.175649268 | 3.789776045 | Up | 9.38E-05 | 0.00015336 | AAEL014410-PA OS=Aedes aegypti GN=AAEL014410 PE=4 SV=1                                 |
| CCG007710.1 | 1231 | 4 | 34 | 0.13962546 | 0.965541357 | 2.789776045 | Up | 3.64E-05 | 6.15E-05   | Putative uncharacterized protein OS=Tribolium castaneum GN=TcasGA2_TC002657 PE=4 SV=1  |
| CCG018263.1 | 1713 | 4 | 34 | 0.10033797 | 0.693859551 | 2.789776045 | Up | 3.64E-05 | 6.15E-05   | AAEL009205-PA OS=Aedes aegypti GN=AAEL009205 PE=4 SV=1                                 |
| CCG018026.1 | 339  | 4 | 34 | 0.50701752 | 3.506139853 | 2.789776045 | Up | 3.64E-05 | 6.15E-05   | -                                                                                      |
| CCG024557.1 | 468  | 4 | 34 | 0.36726269 | 2.539703868 | 2.789776045 | Up | 3.64E-05 | 6.15E-05   | -                                                                                      |
| CCG004394.1 | 789  | 4 | 34 | 0.21784403 | 1.506440317 | 2.789776045 | Up | 3.64E-05 | 6.15E-05   | -                                                                                      |
| CCG008831.1 | 654  | 4 | 34 | 0.26281183 | 1.817402768 | 2.789776045 | Up | 3.64E-05 | 6.15E-05   | AAEL004416-PA OS=Aedes aegypti GN=AAEL004416 PE=4 SV=1                                 |
| CCG007628.1 | 1812 | 6 | 34 | 0.14228389 | 0.655950006 | 2.204813544 | Up | 8.99E-05 | 0.00014816 | AAEL007486-PA (Fragment) OS=Aedes aegypti GN=AAEL007486 PE=4 SV=2                      |

|             |      |    |    |            |             |              |      |           |            |                                                                                              |
|-------------|------|----|----|------------|-------------|--------------|------|-----------|------------|----------------------------------------------------------------------------------------------|
| CCG022976.1 | 327  | 6  | 34 | 0.7884355  | 3.634805536 | 2.204813544  | Up   | 8.99E-05  | 0.00014817 | AAEL002527-PA OS=Anopheles aegypti GN=AAEL002527 PE=4 SV=1                                   |
| CCG021364.1 | 1325 | 7  | 34 | 0.22700992 | 0.897042574 | 1.982421123  | Up   | 0.0002328 | 0.0003729  | Uncharacterized protein OS=Anopheles darlingi GN=AND_11211 PE=4 SV=1                         |
| CCG017799.1 | 375  | 8  | 34 | 0.91668767 | 3.169550427 | 1.789776045  | Up   | 0.0005768 | 0.00090326 | Uncharacterized protein OS=Anopheles darlingi GN=AND_22697 PE=4 SV=1                         |
| CCG018606.1 | 1332 | 8  | 34 | 0.25807648 | 0.892328386 | 1.789776045  | Up   | 0.0005768 | 0.00090332 | AAEL001053-PA OS=Anopheles aegypti GN=AAEL001053 PE=4 SV=1                                   |
| CCG025178.1 | 1956 | 60 | 34 | 1.31809002 | 0.607659208 | -1.117114551 | Down | 0.0002282 | 0.00036562 | Putative uncharacterized protein GLEAN_07721 OS=Tribolium castaneum GN=GLEAN_07721 PE=4 SV=1 |
| CCG010439.1 | 1452 | 61 | 34 | 1.80520235 | 0.818582238 | -1.140961292 | Down | 0.0001567 | 0.00025307 | AGAP013133-PA OS=Anopheles gambiae GN=AgaP_AGAP013133 PE=4 SV=1                              |
| CCG007853.1 | 1353 | 61 | 34 | 1.93729033 | 0.8784785   | -1.140961292 | Down | 0.0001567 | 0.00025306 | AAEL014435-PA OS=Anopheles aegypti GN=AAEL014435 PE=4 SV=1                                   |
| CCG021812.1 | 561  | 63 | 34 | 4.82547822 | 2.118683441 | -1.187503878 | Down | 7.28E-05  | 0.00012058 | AAEL012725-PA OS=Anopheles aegypti GN=AAEL012725 PE=4 SV=1                                   |
| CCG025971.1 | 1323 | 65 | 34 | 2.11113587 | 0.898398647 | -1.232591768 | Down | 3.31E-05  | 5.61E-05   | Putative uncharacterized protein OS=Culex quinquefasciatus GN=CpipJ_CPIJ002877 PE=4 SV=1     |
| CCG006206.1 | 520  | 65 | 34 | 5.37121683 | 2.285733481 | -1.232591768 | Down | 3.31E-05  | 5.61E-05   | -                                                                                            |
| CCG003161.1 | 2444 | 66 | 34 | 1.16039382 | 0.486326273 | -1.254618074 | Down | 2.22E-05  | 3.81E-05   | Putative gag-pol protein OS=Drosophila ananassae PE=4 SV=1                                   |
| CCG008833.1 | 1146 | 72 | 34 | 2.69966919 | 1.037156553 | -1.380148956 | Down | 1.83E-06  | 3.33E-06   | AAEL004418-PA OS=Anopheles aegypti GN=AAEL004418 PE=4 SV=1                                   |
| CCG020168.1 | 2071 | 73 | 34 | 1.51462609 | 0.573916664 | -1.400048514 | Down | 1.19E-06  | 2.18E-06   | GG23150 OS=Drosophila erecta GN=GG23150 PE=4 SV=1                                            |
| CCG016104.1 | 933  | 74 | 34 | 3.40810328 | 1.273935059 | -1.419677321 | Down | 7.69E-07  | 1.42E-06   | AAEL009726-PA OS=Anopheles aegypti GN=AAEL009726 PE=3 SV=1                                   |

|             |      |     |    |            |             |              |      |          |          |                                                                                                         |
|-------------|------|-----|----|------------|-------------|--------------|------|----------|----------|---------------------------------------------------------------------------------------------------------|
| CCG021681.1 | 1098 | 83  | 34 | 3.24816755 | 1.082496731 | -1.585263386 | Down | 1.30E-08 | 2.59E-08 | Cerrate determining protein<br>mab2112 OS=Culex<br>quinquefasciatus<br>GN=CpipJ_CPIJ014033 PE=4<br>SV=1 |
| CCG002883.1 | 1203 | 90  | 34 | 3.21469336 | 0.988014472 | -1.702077051 | Down | 4.53E-10 | 9.44E-10 | AAEL007076-PA OS=Aedes<br>aegypti GN=AAEL007878 PE=3<br>SV=1                                            |
| CCG021773.1 | 1479 | 93  | 34 | 2.70195086 | 0.803638546 | -1.749382766 | Down | 1.03E-10 | 2.19E-10 | Putative uncharacterized protein<br>OS=Culex quinquefasciatus<br>GN=CpipJ_CPIJ012106 PE=4<br>SV=1       |
| CCG002547.1 | 344  | 103 | 34 | 12.865938  | 3.455178518 | -1.896724482 | Down | 6.19E-13 | 1.58E-12 | AAEL000791-PA OS=Aedes<br>aegypti GN=AAEL006791 PE=4<br>SV=1                                            |
| CCG028532.1 | 2595 | 109 | 34 | 1.80489444 | 0.458027518 | -1.97840828  | Down | 2.58E-14 | 8.98E-14 | Putative uncharacterized protein<br>OS=Culex quinquefasciatus<br>GN=CpipJ_CPIJ001896 PE=4<br>SV=1       |
| CCG014243.1 | 1227 | 110 | 34 | 3.85221745 | 0.968689006 | -1.991583668 | Down | 1.51E-14 | 5.33E-14 | AAEL003560-PA OS=Aedes<br>aegypti GN=AAEL003560 PE=3<br>SV=1                                            |
| CCG027763.1 | 1377 | 138 | 34 | 4.30633506 | 0.863167328 | -2.318748412 | Down | 2.13E-21 | 8.40E-21 | AGAP002322-PA OS=Anopheles<br>gambiae GN=AgaP_AGAP002322<br>PE=4 SV=4                                   |
| CCG000893.1 | 4767 | 141 | 34 | 1.2709739  | 0.249335307 | -2.349775307 | Down | 3.65E-22 | 1.45E-21 | AAEL003408-PA OS=Aedes<br>aegypti GN=AAEL003408 PE=4<br>SV=1                                            |
| CCG002665.1 | 1824 | 156 | 34 | 3.67504309 | 0.651634545 | -2.495626174 | Down | 4.60E-26 | 1.89E-25 | AAEL001203-PA OS=Aedes<br>aegypti GN=AAEL001203 PE=4<br>SV=1                                            |
| CCG015206.1 | 854  | 159 | 34 | 8.00021991 | 1.391781511 | -2.52310691  | Down | 7.40E-27 | 3.05E-26 | AAEL005485-PA OS=Aedes<br>aegypti GN=AAEL005485 PE=4<br>SV=1                                            |
| CCG007808.1 | 723  | 181 | 34 | 10.7572918 | 1.643957691 | -2.710069842 | Down | 8.50E-33 | 3.63E-32 | AGAP013096-PA OS=Anopheles<br>gambiae GN=AgaP_AGAP013096<br>PE=4 SV=1                                   |
| CCG001430.1 | 894  | 197 | 34 | 9.46872228 | 1.329509407 | -2.832275774 | Down | 3.13E-37 | 1.37E-36 | -                                                                                                       |
| CCG024006.1 | 549  | 206 | 34 | 16.1234341 | 2.164993461 | -2.896724482 | Down | 9.20E-40 | 4.10E-39 | AAEL015151-PA OS=Aedes<br>aegypti GN=AAEL015151 PE=4<br>SV=1                                            |
| CCG012253.1 | 540  | 333 | 34 | 26.498003  | 2.201076686 | -3.589602322 | Down | 2.26E-77 | 1.14E-76 | AAEL003721-PA OS=Aedes<br>aegypti GN=AAEL003721 PE=4<br>SV=1                                            |
| CCG017704.1 | 307  | 0   | 35 | 0.001      | 3.985471293 | 11.96053462  | Up   | 9.86E-10 | 2.03E-09 | -                                                                                                       |

|             |      |   |    |            |             |             |    |           |            |                                                                                                                                           |
|-------------|------|---|----|------------|-------------|-------------|----|-----------|------------|-------------------------------------------------------------------------------------------------------------------------------------------|
| CCG022715.1 | 507  | 0 | 35 | 0.001      | 2.413293268 | 11.23678753 | Up | 9.86E-10  | 2.03E-09   | AAEL014001-PA OS=Aedes aegypti GN=AAEL014001 PE=4 SV=1                                                                                    |
| CCG024788.1 | 606  | 0 | 35 | 0.001      | 2.019042388 | 10.97945548 | Up | 9.86E-10  | 2.03E-09   | AAEL011908-PA OS=Aedes aegypti GN=AAEL011908 PE=3 SV=1                                                                                    |
| CCG006370.1 | 853  | 0 | 35 | 0.001      | 1.434395882 | 10.48622754 | Up | 9.86E-10  | 2.03E-09   | -                                                                                                                                         |
| CCG003594.1 | 1300 | 0 | 35 | 0.001      | 0.941184375 | 9.878333559 | Up | 9.86E-10  | 2.03E-09   | Uncharacterized protein (Fragment) OS=Xenopus tropicalis GN=LOC100489570 PE=4 SV=1                                                        |
| CCG022958.1 | 633  | 1 | 35 | 0.06788268 | 1.932922096 | 4.831596221 | Up | 0.000587  | 0.0009151  | AAEL000896-PA OS=Aedes aegypti GN=AAEL000896 PE=4 SV=1                                                                                    |
| CCG015907.1 | 567  | 1 | 35 | 0.07578436 | 2.157918319 | 4.831596221 | Up | 0.000587  | 0.00091504 | AAEL007059-PA OS=Aedes aegypti GN=PGRPS5_b PE=4 SV=1                                                                                      |
| CCG026332.1 | 1124 | 2 | 35 | 0.0764586  | 1.08855844  | 3.831596221 | Up | 9.37E-05  | 0.00015325 | AAEL007996-PA OS=Aedes aegypti GN=AAEL007996 PE=4 SV=1                                                                                    |
| CCG000475.1 | 479  | 3 | 35 | 0.26912151 | 2.554362603 | 3.24663372  | Up | 5.37E-05  | 8.96E-05   | -                                                                                                                                         |
| CCG005344.1 | 462  | 4 | 35 | 0.37203233 | 2.648354301 | 2.831596221 | Up | 3.37E-05  | 5.71E-05   | AAEL010835-PA (Fragment) OS=Aedes aegypti GN=AAEL010835 PE=4 SV=1                                                                         |
| CCG000095.1 | 1434 | 6 | 35 | 0.17978968 | 0.853235486 | 2.24663372  | Up | 6.05E-05  | 0.00010058 | Predicted protein OS=Nematostella vectensis GN=v1g196134 PE=4 SV=1                                                                        |
| CCG009549.1 | 1476 | 7 | 35 | 0.203786   | 0.828956428 | 2.024241299 | Up | 0.0001537 | 0.00024835 | Retrotransposable element Tf2 155 kDa protein type, putative OS=Perkinsus marinus (strain ATCC 50983 / TXsc) GN=Pmar_PMAR017345 PE=4 SV=1 |
| CCG006771.1 | 2412 | 7 | 35 | 0.12470487 | 0.507271844 | 2.024241299 | Up | 0.0001537 | 0.00024834 | AAEL000522-PA OS=Aedes aegypti GN=AAEL000522 PE=4 SV=1                                                                                    |
| CCG008341.1 | 942  | 7 | 35 | 0.31930801 | 1.298874402 | 2.024241299 | Up | 0.0001537 | 0.00024837 | AAEL002273-PA OS=Aedes aegypti GN=AAEL002273 PE=3 SV=1                                                                                    |
| CCG004770.1 | 779  | 8 | 35 | 0.44128097 | 1.570654284 | 1.831596221 | Up | 0.0003861 | 0.00061063 | AGAP010462-PA (Fragment) OS=Anopheles gambiae GN=AGAP010462 PE=4 SV=3                                                                     |

|             |      |     |    |            |             |              |      |           |            |                                                                            |
|-------------|------|-----|----|------------|-------------|--------------|------|-----------|------------|----------------------------------------------------------------------------|
| CCG028264.1 | 1119 | 69  | 35 | 2.6496083  | 1.093422419 | -1.276928236 | Down | 1.09E-05  | 1.91E-05   | Uncharacterized protein<br>OS=Anopheles darlingi<br>GN=AND_02396 PE=4 SV=1 |
| CCG024346.1 | 370  | 70  | 35 | 8.12940925 | 3.306864019 | -1.297686796 | Down | 7.26E-06  | 1.29E-05   | -                                                                          |
| CCG001370.1 | 1056 | 78  | 35 | 3.17390085 | 1.158655007 | -1.453805998 | Down | 2.37E-07  | 4.48E-07   | AAEL004295-PA OS=Aedes<br>aegypti GN=AAEL004295 PE=4<br>SV=1               |
| CCG028362.1 | 915  | 106 | 35 | 4.97791461 | 1.337201844 | -1.896324234 | Down | 2.88E-13  | 8.01E-13   | AAEL012292-PA OS=Aedes<br>aegypti GN=AAEL012292 PE=4<br>SV=1               |
| CCG009800.1 | 849  | 129 | 35 | 6.52897028 | 1.441153931 | -2.179631035 | Down | 1.02E-18  | 3.93E-18   | AAEL005980-PA OS=Aedes<br>aegypti GN=AAEL005980 PE=4<br>SV=1               |
| CCG011866.1 | 1464 | 177 | 35 | 5.19511136 | 0.835751152 | -2.636009329 | Down | 3.57E-31  | 1.51E-30   | AAEL011364-PA OS=Aedes<br>aegypti GN=AAEL011364 PE=4<br>SV=1               |
| CCG017224.1 | 942  | 240 | 35 | 10.9477031 | 1.298874402 | -3.075294375 | Down | 6.98E-49  | 3.24E-48   | AAEL007852-PA OS=Aedes<br>aegypti GN=AAEL007852 PE=4<br>SV=1               |
| CCG008142.1 | 867  | 293 | 35 | 14.5214905 | 1.41123378  | -3.363160634 | Down | 1.64E-64  | 8.01E-64   | Putative uncharacterized protein<br>OS=Aedes aegypti PE=4 SV=1             |
| CCG002588.1 | 327  | 322 | 35 | 42.312705  | 3.741711581 | -3.499320657 | Down | 2.93E-73  | 1.47E-72   | AAEL003247-PA OS=Aedes<br>aegypti GN=AAEL003247 PE=4<br>SV=2               |
| CCG026732.1 | 394  | 353 | 35 | 38.4982648 | 3.105430678 | -3.631928153 | Down | 9.89E-83  | 5.05E-82   | AAEL003843-PA OS=Aedes<br>aegypti GN=AAEL003843 PE=4<br>SV=1               |
| CCG000102.1 | 252  | 429 | 35 | 73.1508577 | 4.855316218 | -3.913237617 | Down | 2.27E-106 | 1.21E-105  | AAEL011157-PA OS=Aedes<br>aegypti GN=AAEL011157 PE=4<br>SV=1               |
| CCG004723.1 | 2079 | 576 | 35 | 11.9050347 | 0.588523178 | -4.338328781 | Down | 3.07E-153 | 1.75E-152  | AAEL015354-PA OS=Aedes<br>aegypti GN=AAEL015354 PE=4<br>SV=1               |
| CCG011427.1 | 576  | 0   | 36 | 0.001      | 2.184892298 | 11.09334645  | Up   | 5.44E-10  | 1.13E-09   | -                                                                          |
| CCG026937.1 | 663  | 0   | 36 | 0.001      | 1.898186974 | 10.89040639  | Up   | 5.44E-10  | 1.13E-09   | AGAP006786-PA OS=Anopheles<br>gambiae GN=AGAP006786 PE=4<br>SV=4           |
| CCG014322.1 | 480  | 1   | 36 | 0.08952028 | 2.621870758 | 4.872238205  | Up   | 0.000587  | 0.00091514 | AAEL009770-PA OS=Aedes<br>aegypti GN=AAEL009770 PE=2<br>SV=1               |
| CCG024491.1 | 725  | 1   | 36 | 0.0592686  | 1.73585926  | 4.872238205  | Up   | 0.000587  | 0.0009152  | Putative uncharacterized protein<br>OS=Aedes aegypti PE=4 SV=1             |
| CCG016271.1 | 1161 | 2   | 36 | 0.07402194 | 1.083977574 | 3.872238205  | Up   | 9.36E-05  | 0.00015316 | AAEL013852-PA OS=Aedes<br>aegypti GN=AAEL013852 PE=4<br>SV=1               |

|             |      |   |    |            |             |             |    |           |            |                                                                                                                |
|-------------|------|---|----|------------|-------------|-------------|----|-----------|------------|----------------------------------------------------------------------------------------------------------------|
| CCG004412.1 | 4492 | 2 | 36 | 0.01913167 | 0.280164284 | 3.872238205 | Up | 9.36E-05  | 0.00015318 | BEL12_AG transposon polyprotein<br>OS=Anopheles gambiae<br>GN=BEL12-AG transposon PE=4<br>SV=1                 |
| CCG019174.1 | 399  | 2 | 36 | 0.21538714 | 3.154130235 | 3.872238205 | Up | 9.36E-05  | 0.00015315 | AAEL002017-PA OS=Aedes<br>aegypti GN=AAEL002617 PE=4<br>SV=1                                                   |
| CCG010622.1 | 1752 | 2 | 36 | 0.04905221 | 0.718320756 | 3.872238205 | Up | 9.36E-05  | 0.00015317 | AAEL001986-PA OS=Aedes<br>aegypti GN=AAEL001986 PE=3<br>SV=1                                                   |
| CCG009231.1 | 1629 | 3 | 36 | 0.07913395 | 0.772558603 | 3.287275705 | Up | 5.33E-05  | 8.90E-05   | AAEL010759-PA OS=Aedes<br>aegypti GN=AAEL010759 PE=4<br>SV=1                                                   |
| CCG022961.1 | 3178 | 4 | 36 | 0.054084   | 0.396003135 | 2.872238205 | Up | 3.21E-05  | 5.44E-05   | RNase H and integrase-like<br>protein (Fragment) OS=Bombyx<br>mori GN=P-12 PE=4 SV=1                           |
| CCG006618.1 | 1563 | 4 | 36 | 0.10996733 | 0.805181039 | 2.872238205 | Up | 3.21E-05  | 5.44E-05   | AAEL011888-PA OS=Aedes<br>aegypti GN=AAEL011888 PE=3<br>SV=1                                                   |
| CCG021079.1 | 414  | 5 | 36 | 0.51895815 | 3.039850154 | 2.55031011  | Up | 2.59E-05  | 4.43E-05   | -                                                                                                              |
| CCG026215.1 | 462  | 6 | 36 | 0.5580485  | 2.724021567 | 2.287275705 | Up | 4.16E-05  | 7.01E-05   | AAEL002253-PA OS=Aedes<br>aegypti GN=AAEL002253 PE=4<br>SV=1                                                   |
| CCG020256.1 | 1353 | 6 | 36 | 0.19055315 | 0.930153706 | 2.287275705 | Up | 4.16E-05  | 7.01E-05   | AAEL012594-PA (Fragment)<br>OS=Aedes aegypti<br>GN=AAEL012594 PE=4 SV=1                                        |
| CCG024428.1 | 991  | 6 | 36 | 0.26015985 | 1.26992731  | 2.287275705 | Up | 4.16E-05  | 7.01E-05   | Uncharacterized protein<br>OS=Anopheles darlingi<br>GN=AND_02250 PE=4 SV=1                                     |
| CCG026607.1 | 448  | 7 | 36 | 0.6714021  | 2.809147241 | 2.064883283 | Up | 0.0001016 | 0.00016562 | -                                                                                                              |
| CCG013813.1 | 780  | 8 | 36 | 0.44071523 | 1.613458928 | 1.872238205 | Up | 0.0002575 | 0.0004118  | AAEL014994-PA OS=Aedes<br>aegypti GN=AAEL014994 PE=4<br>SV=1                                                   |
| CCG015251.1 | 868  | 8 | 36 | 0.39603442 | 1.449882447 | 1.872238205 | Up | 0.0002575 | 0.00041178 | -                                                                                                              |
| CCG000547.1 | 2926 | 8 | 36 | 0.1174839  | 0.430108668 | 1.872238205 | Up | 0.0002575 | 0.00041183 | Phosphatidylinositol 3-kinase<br>catalytic subunit type 3<br>OS=Trichinella spiralis<br>GN=Tsp_00889 PE=4 SV=1 |



|             |      |     |    |            |             |              |      |           |            |                                                                                                       |
|-------------|------|-----|----|------------|-------------|--------------|------|-----------|------------|-------------------------------------------------------------------------------------------------------|
| CCG007932.1 | 1220 | 9   | 36 | 0.31698985 | 1.031555708 | 1.702313204  | Up   | 0.0006109 | 0.00095024 | Putative uncharacterized protein<br>GLEAN_15470 OS=Tribolium<br>castaneum GN=GLEAN_15470<br>PE=4 SV=1 |
| CCG003863.1 | 2301 | 60  | 36 | 1.12046244 | 0.54693523  | -1.03465239  | Down | 0.0005359 | 0.00084035 | AAEL005494-FA OS=Aedes<br>aegypti GN=AAEL005494 PE=3<br>SV=1                                          |
| CCG020444.1 | 1113 | 74  | 36 | 2.85692755 | 1.130725933 | -1.33721516  | Down | 2.34E-06  | 4.23E-06   | AAEL002671-FA OS=Aedes<br>aegypti GN=AAEL002671 PE=4<br>SV=1                                          |
| CCG011632.1 | 905  | 78  | 36 | 3.70346884 | 1.390605485 | -1.413164014 | Down | 4.24E-07  | 7.93E-07   | AAEL009929-FA OS=Aedes<br>aegypti GN=AAEL009929 PE=4<br>SV=1                                          |
| CCG012840.1 | 2193 | 81  | 36 | 1.58711742 | 0.573870481 | -1.467611798 | Down | 1.13E-07  | 2.17E-07   | AAEL000025-FA OS=Aedes<br>aegypti GN=AAEL000025 PE=3<br>SV=1                                          |
| CCG022500.1 | 2024 | 86  | 36 | 1.82578912 | 0.621787532 | -1.554026549 | Down | 1.17E-08  | 2.33E-08   | Putative uncharacterized protein<br>OS=Tribolium castaneum<br>GN=TcasGA2_TC010212 PE=4<br>SV=1        |
| CCG026903.1 | 2217 | 87  | 36 | 1.68622775 | 0.56765808  | -1.570705291 | Down | 7.34E-09  | 1.47E-08   | Arylsulfatase B OS=Culex<br>quinquefasciatus<br>GN=CpipJ_CPIJ006774 PE=4<br>SV=1                      |
| CCG002841.1 | 1799 | 88  | 36 | 2.10191031 | 0.699554177 | -1.587193413 | Down | 4.60E-09  | 9.29E-09   | Ecdysis triggering hormone<br>receptor subtype B OS=Aedes<br>aegypti PE=2 SV=1                        |
| CCG021931.1 | 1317 | 90  | 36 | 2.93642833 | 0.95557932  | -1.619614891 | Down | 1.79E-09  | 3.67E-09   | Putative uncharacterized protein<br>OS=Culex quinquefasciatus<br>GN=CpipJ_CPIJ002877 PE=4<br>SV=1     |
| CCG015376.3 | 1525 | 91  | 36 | 2.56409564 | 0.825244566 | -1.635556435 | Down | 1.11E-09  | 2.29E-09   | AAEL009966-FA OS=Aedes<br>aegypti GN=AAEL009966 PE=4<br>SV=1                                          |
| CCG010637.3 | 2064 | 98  | 36 | 2.04022965 | 0.609737386 | -1.742471639 | Down | 3.67E-11  | 7.96E-11   | AAEL010044-FA OS=Aedes<br>aegypti GN=AAEL010044 PE=4<br>SV=1                                          |
| CCG020040.1 | 1830 | 99  | 36 | 2.3245922  | 0.687703805 | -1.757118415 | Down | 2.23E-11  | 4.88E-11   | AAEL004958-FA OS=Aedes<br>aegypti GN=AAEL004958 PE=4<br>SV=1                                          |
| CCG011188.1 | 1437 | 119 | 36 | 3.55838443 | 0.875781464 | -2.022579558 | Down | 6.50E-16  | 2.38E-15   | AAEL015017-FA OS=Aedes<br>aegypti GN=AAEL015017 PE=4<br>SV=1                                          |
| CCG023040.1 | 477  | 149 | 36 | 13.4224119 | 2.638360511 | -2.346930315 | Down | 2.65E-23  | 1.06E-22   | AAEL010529-FA OS=Aedes<br>aegypti GN=AAEL010529 PE=4<br>SV=1                                          |

|             |      |     |    |            |             |              |      |           |            |                                                                                       |
|-------------|------|-----|----|------------|-------------|--------------|------|-----------|------------|---------------------------------------------------------------------------------------|
| CCG010225.1 | 2678 | 149 | 36 | 2.39077314 | 0.469939494 | -2.346930315 | Down | 2.65E-23  | 1.06E-22   | AAEL012443-PA OS=Aedes aegypti GN=AAEL012443 PE=4 SV=1                                |
| CCG020358.1 | 1053 | 151 | 36 | 6.16185178 | 1.195154761 | -2.366166534 | Down | 8.13E-24  | 3.27E-23   | AAEL001427-PA OS=Aedes aegypti GN=AAEL001427 PE=4 SV=1                                |
| CCG024345.1 | 1188 | 157 | 36 | 5.67866021 | 1.05934172  | -2.422382544 | Down | 2.29E-25  | 9.35E-25   | AAEL005244-PA OS=Aedes aegypti GN=AAEL005244 PE=4 SV=1                                |
| CCG024545.1 | 2449 | 175 | 36 | 3.07052003 | 0.513882386 | -2.578972907 | Down | 4.04E-30  | 1.70E-29   | Putative uncharacterized protein OS=Tribolium castaneum GN=TcasGA2_TC010686 PE=4 SV=1 |
| CCG028073.1 | 801  | 207 | 36 | 11.1045382 | 1.571158507 | -2.821248752 | Down | 6.93E-39  | 3.08E-38   | AAEL013483-PA OS=Aedes aegypti GN=AAEL013483 PE=4 SV=1                                |
| CCG008803.1 | 1842 | 218 | 36 | 5.08545176 | 0.68322365  | -2.89594612  | Down | 5.63E-42  | 2.53E-41   | AAEL014086-PA OS=Aedes aegypti GN=AAEL014086 PE=4 SV=1                                |
| CCG012223.1 | 1032 | 279 | 36 | 11.6168178 | 1.219474771 | -3.251883107 | Down | 1.20E-59  | 5.78E-59   | AAEL009295-PA OS=Aedes aegypti GN=AAEL009295 PE=4 SV=1                                |
| CCG028168.1 | 3699 | 358 | 36 | 4.15873614 | 0.340226538 | -3.611577572 | Down | 1.74E-83  | 8.88E-83   | AAEL004824-PA (Fragment) OS=Aedes aegypti GN=AAEL004824 PE=4 SV=1                     |
| CCG007757.1 | 1635 | 703 | 36 | 18.4756718 | 0.769723525 | -4.585142674 | Down | 1.84E-193 | 1.09E-192  | AAEL015128-PA OS=Aedes aegypti GN=AAEL015128 PE=4 SV=1                                |
| CCG007694.1 | 304  | 0   | 37 | 0.001      | 4.254790265 | 12.0548723   | Up   | 3.00E-10  | 6.30E-10   | Importin OS=Culex quinquefasciatus GN=CpipJ_CPIJ008197 PE=4 SV=1                      |
| CCG009214.1 | 2646 | 0   | 37 | 0.001      | 0.488834558 | 8.93320247   | Up   | 3.00E-10  | 6.30E-10   | AAEL009308-PA OS=Aedes aegypti GN=AAEL009308 PE=4 SV=1                                |
| CCG019605.1 | 1542 | 1   | 37 | 0.02786624 | 0.838817277 | 4.911766569  | Up   | 0.000587  | 0.00091525 | AAEL011028-PA OS=Aedes aegypti GN=AAEL011028 PE=4 SV=1                                |
| CCG010129.1 | 609  | 2   | 37 | 0.14111571 | 2.123901873 | 3.911766569  | Up   | 9.36E-05  | 0.00015313 | AAEL003927-PA OS=Aedes aegypti GN=AAEL003927 PE=4 SV=1                                |
| CCG021352.1 | 657  | 4   | 37 | 0.26161178 | 1.96873096  | 2.911766569  | Up   | 3.11E-05  | 5.27E-05   | AAEL000890-PA OS=Aedes aegypti GN=AAEL000890 PE=4 SV=1                                |
| CCG027996.1 | 1275 | 4   | 37 | 0.13480701 | 1.014475483 | 2.911766569  | Up   | 3.11E-05  | 5.27E-05   | AAEL000683-PA OS=Aedes aegypti GN=AAEL000683 PE=4 SV=1                                |

|             |      |     |    |            |             |              |      |           |            |                                                                                                   |
|-------------|------|-----|----|------------|-------------|--------------|------|-----------|------------|---------------------------------------------------------------------------------------------------|
| CCG027407.4 | 3302 | 4   | 37 | 0.05205298 | 0.391719031 | 2.911766569  | Up   | 3.11E-05  | 5.27E-05   | Putative uncharacterized protein<br>OS=Tribolium castaneum<br>GN=TcasGA2_TC001426 PE=4<br>SV=1    |
| CCG008206.1 | 869  | 6   | 37 | 0.29668401 | 1.488442164 | 2.326804069  | Up   | 2.95E-05  | 5.03E-05   | -                                                                                                 |
| CCG017002.1 | 1632 | 6   | 37 | 0.15797697 | 0.792558971 | 2.326804069  | Up   | 2.95E-05  | 5.03E-05   | -                                                                                                 |
| CCG017561.1 | 278  | 7   | 37 | 1.08197173 | 4.65272029  | 2.104411647  | Up   | 6.74E-05  | 0.00011187 | -                                                                                                 |
| CCG012024.1 | 1110 | 8   | 37 | 0.30969178 | 1.165275892 | 1.911766569  | Up   | 0.0001713 | 0.000276   | -                                                                                                 |
| CCG005680.1 | 879  | 9   | 37 | 0.43996315 | 1.471508806 | 1.741841568  | Up   | 0.0004132 | 0.0006527  | Uncharacterized protein<br>OS=Anopheles darlingi<br>GN=AND_05546 PE=4 SV=1                        |
| CCG016117.1 | 775  | 9   | 37 | 0.49900337 | 1.668975794 | 1.741841568  | Up   | 0.0004132 | 0.00065274 | -                                                                                                 |
| CCG022082.2 | 1479 | 65  | 37 | 1.88846028 | 0.87454783  | -1.110601244 | Down | 0.0001342 | 0.00021768 | AGAP005610-PA OS=Anopheles<br>gambiae GN=AGAP005610 PE=4<br>SV=4                                  |
| CCG002532.1 | 399  | 66  | 37 | 7.10777565 | 3.241744964 | -1.13262755  | Down | 9.24E-05  | 0.00015231 | AAEL000536-PA OS=Aedes<br>aegypti GN=AAEL000536 PE=4<br>SV=1                                      |
| CCG007798.1 | 1425 | 66  | 37 | 1.99017718 | 0.90768859  | -1.13262755  | Down | 9.24E-05  | 0.0001523  | AAEL005123-PA (Fragment)<br>OS=Aedes aegypti<br>GN=AAEL005123 PE=4 SV=2                           |
| CCG011730.1 | 1782 | 78  | 37 | 1.88083013 | 0.725845253 | -1.373635649 | Down | 7.44E-07  | 1.38E-06   | Putative uncharacterized protein<br>OS=Culex quinquefasciatus<br>GN=CpipJ_CPIJ006773 PE=3<br>SV=1 |
| CCG023203.1 | 639  | 89  | 37 | 5.98483002 | 2.02418817  | -1.563966862 | Down | 5.51E-09  | 1.11E-08   | Uncharacterized protein<br>OS=Anopheles darlingi<br>GN=AND_09440 PE=4 SV=1                        |
| CCG015586.1 | 1146 | 96  | 37 | 3.59955892 | 1.128670367 | -1.673195931 | Down | 1.99E-10  | 4.21E-10   | Putative uncharacterized protein<br>OS=Culex quinquefasciatus<br>GN=CpipJ_CPIJ014452 PE=4<br>SV=1 |
| CCG010510.1 | 912  | 96  | 37 | 4.52312996 | 1.418263422 | -1.673195931 | Down | 1.99E-10  | 4.21E-10   | AAEL001496-PA OS=Aedes<br>aegypti GN=AAEL001496 PE=4<br>SV=1                                      |
| CCG027757.1 | 8649 | 104 | 37 | 0.51669007 | 0.149549802 | -1.788673149 | Down | 3.81E-12  | 8.83E-12   | AAEL000700-PA OS=Aedes<br>aegypti GN=AAEL000700 PE=3<br>SV=1                                      |
| CCG019067.1 | 1405 | 106 | 37 | 3.24184475 | 0.920609424 | -1.816153885 | Down | 1.38E-12  | 3.35E-12   | -                                                                                                 |
| CCG024799.1 | 522  | 127 | 37 | 10.4543224 | 2.477885518 | -2.076918117 | Down | 1.98E-17  | 7.52E-17   | -                                                                                                 |

|             |      |     |    |            |             |              |      |           |           |                                                                                                   |
|-------------|------|-----|----|------------|-------------|--------------|------|-----------|-----------|---------------------------------------------------------------------------------------------------|
| CCG017001.1 | 3871 | 140 | 37 | 1.55405912 | 0.334140078 | -2.217516447 | Down | 1.34E-20  | 5.26E-20  | Putative uncharacterized protein<br>OS=Caenorhabditis remanei<br>GN=CRE_17270 PE=4 SV=1           |
| CCG028383.1 | 900  | 144 | 37 | 6.87515754 | 1.437173601 | -2.258158432 | Down | 1.35E-21  | 5.34E-21  | AAEL008092-PA OS=Aedes<br>aegypti GN=AAEL008092 PE=4<br>SV=1                                      |
| CCG013115.1 | 931  | 144 | 37 | 6.64623178 | 1.38931927  | -2.258158432 | Down | 1.35E-21  | 5.34E-21  | -                                                                                                 |
| CCG002523.1 | 426  | 156 | 37 | 15.7353958 | 3.036282255 | -2.373635649 | Down | 1.21E-24  | 4.91E-24  | Putative uncharacterized protein<br>OS=Culex quinquefasciatus<br>GN=CpipJ_CPIJ002862 PE=4<br>SV=1 |
| CCG019479.1 | 813  | 165 | 37 | 8.72079485 | 1.590967086 | -2.454555645 | Down | 5.61E-27  | 2.32E-26  | AAEL000571-PA OS=Aedes<br>aegypti GN=AAEL000571 PE=4<br>SV=1                                      |
| CCG005767.1 | 521  | 166 | 37 | 13.6909327 | 2.482641537 | -2.463272862 | Down | 3.07E-27  | 1.27E-26  | -                                                                                                 |
| CCG002685.1 | 1794 | 182 | 37 | 4.35924844 | 0.720990101 | -2.596028071 | Down | 1.73E-31  | 7.37E-31  | AAEL000127-PA OS=Aedes<br>aegypti GN=AAEL000127 PE=4<br>SV=1                                      |
| CCG023925.1 | 813  | 194 | 37 | 10.2535406 | 1.590967086 | -2.688146273 | Down | 9.68E-35  | 4.19E-34  | AAEL012640-PA OS=Aedes<br>aegypti GN=AAEL012646 PE=4<br>SV=1                                      |
| CCG006642.1 | 4131 | 195 | 37 | 2.02834622 | 0.313109717 | -2.695563744 | Down | 5.16E-35  | 2.24E-34  | AAEL007374-PA OS=Aedes<br>aegypti GN=AAEL007374 PE=4<br>SV=1                                      |
| CCG019243.1 | 825  | 231 | 37 | 12.0315257 | 1.567825746 | -2.939982472 | Down | 4.58E-45  | 2.09E-44  | AAEL001396-PA OS=Aedes<br>aegypti GN=AAEL001396 PE=4<br>SV=1                                      |
| CCG001629.1 | 489  | 266 | 37 | 23.3741297 | 2.645104786 | -3.143515866 | Down | 3.70E-55  | 1.76E-54  | AAEL008458-PA OS=Aedes<br>aegypti GN=AAEL008458 PE=4<br>SV=1                                      |
| CCG007373.1 | 1812 | 286 | 37 | 6.78219873 | 0.713827947 | -3.248104767 | Down | 4.89E-61  | 2.37E-60  | AAEL007968-PA OS=Aedes<br>aegypti GN=AAEL007968 PE=4<br>SV=1                                      |
| CCG023974.1 | 1275 | 344 | 37 | 11.5934029 | 1.014475483 | -3.514498185 | Down | 1.91E-78  | 9.64E-78  | AAEL006994-PA OS=Aedes<br>aegypti GN=AAEL006994 PE=4<br>SV=1                                      |
| CCG000019.1 | 1062 | 404 | 37 | 16.3463021 | 1.217943729 | -3.746444913 | Down | 6.91E-97  | 3.64E-96  | AAEL004133-PA OS=Aedes<br>aegypti GN=AAEL004133 PE=4<br>SV=1                                      |
| CCG027841.1 | 1467 | 585 | 37 | 17.1351702 | 0.881701595 | -4.280526245 | Down | 3.39E-154 | 1.93E-153 | AAEL001766-PA OS=Aedes<br>aegypti GN=AAEL001766 PE=4<br>SV=1                                      |
| CCG008209.1 | 480  | 0   | 38 | 0.001      | 2.767530244 | 11.43438337  | Up   | 1.65E-10  | 3.51E-10  | AAEL006670-PA OS=Aedes<br>aegypti GN=AAEL006670 PE=4<br>SV=1                                      |

|             |      |    |    |            |             |              |      |           |            |                                                                                                    |
|-------------|------|----|----|------------|-------------|--------------|------|-----------|------------|----------------------------------------------------------------------------------------------------|
| CCG028396.1 | 629  | 0  | 38 | 0.001      | 2.111946768 | 11.04435776  | Up   | 1.65E-10  | 3.51E-10   | ATP-binding cassette sub-family G member 4 OS=Culex quinquefasciatus GN=CpipJ_CPIJ012372 PE=3 SV=1 |
| CCG023853.1 | 1434 | 0  | 38 | 0.001      | 0.926369956 | 9.855444655  | Up   | 1.65E-10  | 3.51E-10   | AAEL006556-PA OS=Aedes aegypti GN=AAEL008538 PE=4 SV=1                                             |
| CCG026407.1 | 1280 | 1  | 38 | 0.03357011 | 1.037823842 | 4.950240717  | Up   | 0.000587  | 0.00091536 | -                                                                                                  |
| CCG025537.1 | 596  | 2  | 38 | 0.14419374 | 2.228883418 | 3.950240717  | Up   | 9.36E-05  | 0.00015311 | AAEL010576-PA OS=Aedes aegypti GN=AAEL010576 PE=4 SV=1                                             |
| CCG003231.1 | 438  | 2  | 38 | 0.19620883 | 3.032909857 | 3.950240717  | Up   | 9.36E-05  | 0.00015313 | Reverse transcriptase OS=Aedes aegypti GN=pol PE=4 SV=1                                            |
| CCG015576.1 | 1591 | 2  | 38 | 0.05401601 | 0.834955699 | 3.950240717  | Up   | 9.36E-05  | 0.00015312 | -                                                                                                  |
| CCG000531.1 | 797  | 3  | 38 | 0.16174304 | 1.666768529 | 3.365278217  | Up   | 5.30E-05  | 8.85E-05   | -                                                                                                  |
| CCG006648.1 | 444  | 4  | 38 | 0.38711473 | 2.991924589 | 2.950240717  | Up   | 3.05E-05  | 5.17E-05   | Uncharacterized protein OS=Anopheles darlingi GN=AND_09855 PE=4 SV=1                               |
| CCG019103.1 | 588  | 4  | 38 | 0.29231112 | 2.259208363 | 2.950240717  | Up   | 3.05E-05  | 5.17E-05   | AAEL015271-PA OS=Aedes aegypti GN=AAEL015271 PE=3 SV=1                                             |
| CCG000496.4 | 1740 | 7  | 38 | 0.17286675 | 0.763456619 | 2.142885795  | Up   | 4.51E-05  | 7.58E-05   | AAEL001522-PA OS=Aedes aegypti GN=AAEL001522 PE=4 SV=1                                             |
| CCG015243.1 | 519  | 9  | 38 | 0.74513991 | 2.559565544 | 1.780315716  | Up   | 0.0002783 | 0.00044376 | AAEL013338-PA OS=Aedes aegypti GN=AAEL013338 PE=3 SV=1                                             |
| CCG009948.1 | 444  | 10 | 38 | 0.96778682 | 2.991924589 | 1.628312622  | Up   | 0.0006347 | 0.0009862  | Odorant-binding protein 12 OS=Culex quinquefasciatus PE=2 SV=1                                     |
| CCG015137.1 | 1922 | 10 | 38 | 0.22356782 | 0.6911626   | 1.628312622  | Up   | 0.0006347 | 0.00098626 | Putative uncharacterized protein (Fragment) OS=Solenopsis invicta GN=SINV_11683 PE=4 SV=1          |
| CCG008601.1 | 710  | 65 | 38 | 3.93384894 | 1.871006362 | -1.072127096 | Down | 0.0002067 | 0.00033199 | -                                                                                                  |
| CCG023576.1 | 1325 | 76 | 38 | 2.46467912 | 1.002576994 | -1.297686796 | Down | 2.94E-06  | 5.28E-06   | AAEL005787-PA OS=Aedes aegypti GN=AAEL005787 PE=3 SV=1                                             |
| CCG000249.1 | 261  | 78 | 38 | 12.8415299 | 5.089710794 | -1.335161502 | Down | 1.28E-06  | 2.35E-06   | Putative uncharacterized protein GLEAN_07454 OS=Tribolium castaneum GN=GLEAN_07454 PE=4 SV=1       |

|             |      |       |    |            |             |              |      |           |           |                                                                                          |
|-------------|------|-------|----|------------|-------------|--------------|------|-----------|-----------|------------------------------------------------------------------------------------------|
| CCG005706.1 | 1203 | 79    | 38 | 2.8217864  | 1.104251469 | -1.353540031 | Down | 8.43E-07  | 1.56E-06  | Putative uncharacterized protein OS=Aedes aegypti PE=4 SV=1                              |
| CCG013865.1 | 6722 | 80    | 38 | 0.51139226 | 0.197621916 | -1.371687378 | Down | 5.52E-07  | 1.03E-06  | Pol-like protein OS=Aedes aegypti PE=4 SV=1                                              |
| CCG004293.1 | 723  | 90    | 38 | 5.34892962 | 1.837364478 | -1.541612379 | Down | 6.56E-09  | 1.32E-08  | AAEL005463-FA OS=Aedes aegypti GN=AAEL005485 PE=4 SV=1                                   |
| CCG009907.1 | 1341 | 97    | 38 | 3.10817618 | 0.990614853 | -1.649672125 | Down | 2.45E-10  | 5.16E-10  | AAEL009043-FA OS=Aedes aegypti GN=AAEL009045 PE=4 SV=1                                   |
| CCG000994.1 | 1317 | 120   | 38 | 3.91523778 | 1.008667059 | -1.956649878 | Down | 2.09E-15  | 7.56E-15  | AGAP004235-PC OS=Anopheles gambiae GN=AgaP_AGAP004235 PE=3 SV=1                          |
| CCG009764.1 | 2013 | 137   | 38 | 2.9244181  | 0.659917793 | -2.147791366 | Down | 1.90E-19  | 7.38E-19  | AAEL002622-FA OS=Aedes aegypti GN=AAEL002622 PE=4 SV=1                                   |
| CCG012531.1 | 1569 | 139   | 38 | 3.8067515  | 0.846663172 | -2.168700355 | Down | 6.17E-20  | 2.41E-19  | AAEL002814-FA OS=Aedes aegypti GN=AAEL002814 PE=4 SV=1                                   |
| CCG011195.1 | 2066 | 164   | 38 | 3.41095667 | 0.642988634 | -2.407311287 | Down | 3.03E-26  | 1.25E-25  | Putative uncharacterized protein OS=Culex quinquefasciatus GN=CpipJ_CPIJ017464 PE=4 SV=1 |
| CCG005501.1 | 2673 | 189   | 38 | 3.03826406 | 0.496975128 | -2.612001707 | Down | 7.41E-33  | 3.17E-32  | Putative uncharacterized protein OS=Tribolium castaneum GN=TcasGA2_TC001808 PE=4 SV=1    |
| CCG016900.1 | 1527 | 234   | 38 | 6.58475304 | 0.869950568 | -2.920124002 | Down | 2.55E-45  | 1.16E-44  | AAEL007607-FA OS=Aedes aegypti GN=CYP4D38 PE=3 SV=1                                      |
| CCG012678.1 | 1731 | 314   | 38 | 7.79462546 | 0.767426064 | -3.344380032 | Down | 1.14E-68  | 5.62E-68  | AAEL007253-FA OS=Aedes aegypti GN=AAEL007253 PE=4 SV=1                                   |
| CCG000126.1 | 6780 | 351   | 38 | 2.22453936 | 0.195931345 | -3.505086503 | Down | 7.99E-80  | 4.06E-79  | AAEL006527-FA OS=Aedes aegypti GN=AAEL006527 PE=4 SV=1                                   |
| CCG010712.1 | 4248 | 506   | 38 | 5.11833468 | 0.312715282 | -4.032752857 | Down | 4.86E-128 | 2.69E-127 | DCAF_L2 OS=Culex quinquefasciatus GN=CpipJ_CPIJ006873 PE=4 SV=1                          |
| CCG002875.1 | 4322 | 1062  | 38 | 10.5585049 | 0.307361064 | -5.102327334 | Down | 0         | 0         | AAEL007226-FA OS=Aedes aegypti GN=AAEL007226 PE=4 SV=1                                   |
| CCG021309.1 | 699  | 43768 | 38 | 2690.557   | 1.900449953 | -10.46734812 | Down | 0         | 0         | AAEL001319-FA OS=Aedes aegypti GN=AAEL001319 PE=4 SV=1                                   |

|             |      |   |    |            |             |             |    |          |            |                                                                                              |
|-------------|------|---|----|------------|-------------|-------------|----|----------|------------|----------------------------------------------------------------------------------------------|
| CCG020714.1 | 453  | 0 | 39 | 0.001      | 3.009652967 | 11.55538143 | Up | 9.12E-11 | 1.95E-10   | AAEL002550-PA OS=Aedes aegypti GN=AAEL002550 PE=4 SV=1                                       |
| CCG012118.1 | 1520 | 0 | 39 | 0.001      | 0.896955786 | 9.808893061 | Up | 9.12E-11 | 1.95E-10   | Pol polyprotein (Fragment) OS=Anopheles gambiae PE=4 SV=1                                    |
| CCG004888.2 | 1446 | 1 | 39 | 0.02971628 | 0.942858087 | 4.987715423 | Up | 0.000587 | 0.0009153  | AAEL012230-PA OS=Aedes aegypti GN=AAEL012230 PE=4 SV=1                                       |
| CCG023387.1 | 780  | 2 | 39 | 0.11017881 | 1.747913839 | 3.987715423 | Up | 9.36E-05 | 0.00015312 | -                                                                                            |
| CCG006004.1 | 1422 | 3 | 39 | 0.09065345 | 0.958771304 | 3.402752922 | Up | 5.29E-05 | 8.84E-05   | AAEL003714-PA OS=Aedes aegypti GN=AAEL003714 PE=4 SV=1                                       |
| CCG006351.1 | 435  | 3 | 39 | 0.296343   | 3.134190331 | 3.402752922 | Up | 5.29E-05 | 8.83E-05   | AAEL002875-PA OS=Aedes aegypti GN=AAEL002875 PE=4 SV=1                                       |
| CCG000416.1 | 342  | 3 | 39 | 0.3769275  | 3.986470158 | 3.402752922 | Up | 5.29E-05 | 8.84E-05   | AAEL003922-PA OS=Aedes aegypti GN=AAEL003922 PE=4 SV=1                                       |
| CCG008499.1 | 731  | 3 | 39 | 0.17634638 | 1.865079062 | 3.402752922 | Up | 5.29E-05 | 8.84E-05   | Putative uncharacterized protein OS=Culex quinquefasciatus GN=CpipJ_CPIJ004469 PE=4 SV=1     |
| CCG021600.1 | 855  | 4 | 39 | 0.201028   | 1.594588063 | 2.987715423 | Up | 3.01E-05 | 5.11E-05   | -                                                                                            |
| CCG005294.1 | 2130 | 4 | 39 | 0.08069434 | 0.640081124 | 2.987715423 | Up | 3.01E-05 | 5.11E-05   | Putative uncharacterized protein OS=Culex quinquefasciatus GN=CpipJ_CPIJ014312 PE=4 SV=1     |
| CCG018487.1 | 1150 | 4 | 39 | 0.14945995 | 1.18554156  | 2.987715423 | Up | 3.01E-05 | 5.11E-05   | Serine/threonine-protein kinase rio2 OS=Culex quinquefasciatus GN=CpipJ_CPIJ009507 PE=4 SV=1 |
| CCG001964.1 | 573  | 5 | 39 | 0.37495405 | 2.379359152 | 2.665787328 | Up | 1.83E-05 | 3.15E-05   | AAEL0008915-PA OS=Aedes aegypti GN=AAEL0008915 PE=4 SV=1                                     |
| CCG005798.1 | 1027 | 6 | 39 | 0.25104032 | 1.327529498 | 2.402752922 | Up | 1.68E-05 | 2.90E-05   | GK10815 OS=Drosophila willistoni GN=GK10815 PE=4 SV=1                                        |
| CCG010207.1 | 1587 | 6 | 39 | 0.16245646 | 0.859088087 | 2.402752922 | Up | 1.68E-05 | 2.90E-05   | AAEL001730-PA OS=Aedes aegypti GN=AAEL001730 PE=4 SV=1                                       |
| CCG027151.1 | 2079 | 6 | 39 | 0.12401078 | 0.65578297  | 2.402752922 | Up | 1.68E-05 | 2.90E-05   | AAEL013981-PA OS=Aedes aegypti GN=AAEL013981 PE=4 SV=1                                       |
| CCG015654.1 | 1389 | 7 | 39 | 0.21655014 | 0.981549888 | 2.180360501 | Up | 3.06E-05 | 5.19E-05   | Putative uncharacterized protein OS=Culex quinquefasciatus GN=CpipJ_CPIJ017585 PE=4 SV=1     |

|             |      |     |    |            |             |              |      |           |            |                                                                                                       |
|-------------|------|-----|----|------------|-------------|--------------|------|-----------|------------|-------------------------------------------------------------------------------------------------------|
| CCG024956.1 | 684  | 7   | 39 | 0.43974875 | 1.993235079 | 2.180360501  | Up   | 3.06E-05  | 5.19E-05   | -                                                                                                     |
| CCG003968.1 | 831  | 8   | 39 | 0.41366772 | 1.640641148 | 1.987715423  | Up   | 7.55E-05  | 0.0001249  | GD15954 OS=Drosophila simulans GN=GD15954 PE=4 SV=1                                                   |
| CCG024376.1 | 1155 | 8   | 39 | 0.29762587 | 1.180409346 | 1.987715423  | Up   | 7.55E-05  | 0.00012492 | Uncharacterized protein OS=Anopheles darlingi GN=AND_22299 PE=4 SV=1                                  |
| CCG007550.1 | 337  | 8   | 39 | 1.02005305 | 4.0456166   | 1.987715423  | Up   | 7.55E-05  | 0.00012491 | AAEL010576-FJ OS=Aedes aegypti GN=AAEL010576 PE=4 SV=1                                                |
| CCG009173.1 | 1687 | 8   | 39 | 0.20376875 | 0.808164075 | 1.987715423  | Up   | 7.55E-05  | 0.00012489 | Putative uncharacterized protein OS=Caenorhabditis brenneri GN=CAEBREN_12673 PE=4 SV=1                |
| CCG013189.1 | 1033 | 9   | 39 | 0.37437329 | 1.319818775 | 1.817790421  | Up   | 0.0001868 | 0.00030071 | -                                                                                                     |
| CCG025808.1 | 454  | 10  | 39 | 0.94646993 | 3.003023776 | 1.665787328  | Up   | 0.0004335 | 0.00068402 | AAEL010576-FN OS=Aedes aegypti GN=AAEL010576 PE=4 SV=1                                                |
| CCG028085.1 | 626  | 10  | 39 | 0.68641749 | 2.177911812 | 1.665787328  | Up   | 0.0004335 | 0.00068398 | -                                                                                                     |
| CCG021826.1 | 1005 | 73  | 39 | 3.1211847  | 1.356589845 | -1.202109136 | Down | 1.61E-05  | 2.78E-05   | AAEL015307-FA OS=Aedes aegypti GN=AAEL015307 PE=4 SV=1                                                |
| CCG001962.1 | 1266 | 80  | 39 | 2.71530708 | 1.076913739 | -1.334212672 | Down | 9.50E-07  | 1.75E-06   | AAEL008186-FA OS=Aedes aegypti GN=AAEL008186 PE=4 SV=1                                                |
| CCG003216.1 | 1434 | 82  | 39 | 2.45712569 | 0.950748113 | -1.369836582 | Down | 4.09E-07  | 7.65E-07   | AAEL005004-FA OS=Aedes aegypti GN=AAEL005004 PE=4 SV=1                                                |
| CCG009151.1 | 813  | 85  | 39 | 4.49253068 | 1.676965306 | -1.421675513 | Down | 1.12E-07  | 2.16E-07   | AAEL005774-FA OS=Aedes aegypti GN=AAEL005774 PE=4 SV=1                                                |
| CCG023158.1 | 993  | 111 | 39 | 4.80326339 | 1.37298368  | -1.806700444 | Down | 4.99E-13  | 1.30E-12   | AAEL013502-FA OS=Aedes aegypti GN=AAEL013502 PE=4 SV=1                                                |
| CCG014544.1 | 2081 | 119 | 39 | 2.45718329 | 0.655152712 | -1.907102341 | Down | 8.05E-15  | 2.89E-14   | AAEL004862-FA OS=Aedes aegypti GN=AAEL004862 PE=4 SV=1                                                |
| CCG017808.1 | 1041 | 144 | 39 | 5.94394023 | 1.309676075 | -2.182209579 | Down | 9.45E-21  | 3.71E-20   | -                                                                                                     |
| CCG025932.1 | 1539 | 180 | 39 | 5.02569995 | 0.885882257 | -2.504137674 | Down | 5.96E-30  | 2.51E-29   | C-AMP specific 3',5'-cyclic phosphodiesterase OS=Culex quinquefasciatus GN=CpipJ_CPIJ003154 PE=3 SV=1 |
| CCG015089.1 | 486  | 186 | 39 | 16.4452071 | 2.805293815 | -2.551443388 | Down | 1.53E-31  | 6.48E-31   | AAEL007493-FA OS=Aedes aegypti GN=AAEL007493 PE=4 SV=1                                                |



|             |      |     |    |            |             |              |      |           |            |                                                                      |
|-------------|------|-----|----|------------|-------------|--------------|------|-----------|------------|----------------------------------------------------------------------|
| CCG006559.1 | 2103 | 193 | 39 | 3.94348967 | 0.648298999 | -2.604741615 | Down | 2.03E-33  | 8.71E-33   | AAEL000134-PA OS=Aedes aegypti GN=AAEL000134 PE=4 SV=1               |
| CCG014923.1 | 462  | 244 | 39 | 22.6939724 | 2.951023364 | -2.943021915 | Down | 1.46E-47  | 6.74E-47   | AAEL001985-PA OS=Aedes aegypti GN=AAEL001985 PE=4 SV=1               |
| CCG000890.1 | 219  | 359 | 39 | 70.4389713 | 6.225446548 | -3.500124611 | Down | 1.66E-81  | 8.48E-81   | AAEL003417-PA OS=Aedes aegypti GN=AAEL003417 PE=4 SV=1               |
| CCG007814.1 | 648  | 492 | 39 | 32.6251689 | 2.103970361 | -3.954799083 | Down | 9.85E-123 | 5.41E-122  | AAEL009585-PA OS=Aedes aegypti GN=AAEL009585 PE=4 SV=1               |
| CCG009557.1 | 1574 | 0   | 40 | 0.001      | 0.888393311 | 9.79505472   | Up   | 5.03E-11  | 1.08E-10   | AAEL002671-PA OS=Aedes aegypti GN=AAEL002671 PE=4 SV=1               |
| CCG009270.1 | 1695 | 2   | 40 | 0.05070175 | 0.824974083 | 4.024241299  | Up   | 9.36E-05  | 0.00015312 | AAEL003187-PA (Fragment) OS=Aedes aegypti GN=AAEL003187 PE=4 SV=1    |
| CCG009045.1 | 516  | 4   | 40 | 0.33309872 | 2.709943936 | 3.024241299  | Up   | 2.99E-05  | 5.07E-05   | -                                                                    |
| CCG022448.1 | 708  | 5   | 40 | 0.30345858 | 1.975043885 | 2.702313204  | Up   | 1.74E-05  | 3.00E-05   | AAEL000781-PA OS=Aedes aegypti GN=AAEL000781 PE=4 SV=1               |
| CCG008463.1 | 1133 | 6   | 40 | 0.22755376 | 1.234184529 | 2.439278798  | Up   | 1.37E-05  | 2.38E-05   | AAEL014001-PA OS=Aedes aegypti GN=AAEL014001 PE=4 SV=1               |
| CCG012654.1 | 1829 | 7   | 40 | 0.16445497 | 0.764533117 | 2.216886377  | Up   | 2.12E-05  | 3.64E-05   | AAEL005170-PA OS=Aedes aegypti GN=AAEL005170 PE=4 SV=1               |
| CCG002442.1 | 594  | 68  | 40 | 4.9190942  | 2.354092712 | -1.063221543 | Down | 0.0001633 | 0.00026344 | AAEL011787-PA OS=Aedes aegypti GN=AAEL011787 PE=4 SV=1               |
| CCG004470.1 | 2208 | 71  | 40 | 1.38172607 | 0.633302115 | -1.125505821 | Down | 5.46E-05  | 9.11E-05   | AAEL009062-PA OS=Aedes aegypti GN=AAEL009062 PE=4 SV=2               |
| CCG004907.1 | 2307 | 71  | 40 | 1.32243223 | 0.606125302 | -1.125505821 | Down | 5.46E-05  | 9.11E-05   | Polyprotein OS=Antheraea mylitta PE=4 SV=1                           |
| CCG021943.1 | 408  | 73  | 40 | 7.68821232 | 3.427282036 | -1.16558326  | Down | 2.57E-05  | 4.40E-05   | Uncharacterized protein OS=Anopheles darlingi GN=AND_07352 PE=4 SV=1 |
| CCG019476.1 | 774  | 73  | 40 | 4.05270107 | 1.806629291 | -1.16558326  | Down | 2.57E-05  | 4.40E-05   | AGAP002178-PA OS=Anopheles gambiae GN=AgaP_AGAP002178 PE=3 SV=5      |
| CCG020813.1 | 717  | 74  | 40 | 4.43481222 | 1.95025254  | -1.185212067 | Down | 1.75E-05  | 3.02E-05   | -                                                                    |

|             |      |     |    |            |             |              |      |          |          |                                                                                                   |
|-------------|------|-----|----|------------|-------------|--------------|------|----------|----------|---------------------------------------------------------------------------------------------------|
| CCG001626.1 | 2181 | 76  | 40 | 1.49734059 | 0.641142169 | -1.223686215 | Down | 8.03E-06 | 1.42E-05 | Putative uncharacterized protein<br>OS=Culex quinquefasciatus<br>GN=CpipJ_CPIJ015620 PE=4<br>SV=1 |
| CCG011834.1 | 1052 | 77  | 40 | 3.14512316 | 1.329212045 | -1.242545242 | Down | 5.41E-06 | 9.60E-06 | Hypothetical conserved protein<br>OS=Aedes aegypti PE=2 SV=1                                      |
| CCG009265.1 | 3512 | 80  | 40 | 0.97880944 | 0.39815805  | -1.297686796 | Down | 1.61E-06 | 2.94E-06 | Pol polyprotein (Fragment)<br>OS=Anopheles gambiae PE=4<br>SV=1                                   |
| CCG010139.1 | 1884 | 88  | 40 | 2.0070789  | 0.742213944 | -1.43519032  | Down | 5.40E-08 | 1.05E-07 | AAEL002671-PA OS=Aedes<br>aegypti GN=AAEL002671 PE=4<br>SV=1                                      |
| CCG025233.1 | 720  | 93  | 40 | 5.55025739 | 1.942126487 | -1.514917512 | Down | 5.81E-09 | 1.17E-08 | AAEL001235-PA OS=Aedes<br>aegypti GN=AAEL001235 PE=4<br>SV=1                                      |
| CCG015421.1 | 1080 | 106 | 40 | 4.21739988 | 1.294750992 | -1.703679156 | Down | 1.25E-11 | 2.78E-11 | AAEL001075-PA OS=Aedes<br>aegypti GN=AAEL001075 PE=4<br>SV=1                                      |
| CCG018764.1 | 855  | 110 | 40 | 5.52826995 | 1.635474937 | -1.757118415 | Down | 1.74E-12 | 4.17E-12 | AAEL012832-PA OS=Aedes<br>aegypti GN=AAEL012832 PE=4<br>SV=1                                      |
| CCG011358.1 | 1116 | 130 | 40 | 5.00543504 | 1.252984831 | -1.998126514 | Down | 5.35E-17 | 2.02E-16 | AAEL004213-PA OS=Aedes<br>aegypti GN=AAEL004213 PE=4<br>SV=1                                      |
| CCG007374.1 | 2222 | 135 | 40 | 2.61067244 | 0.629311913 | -2.052574298 | Down | 3.55E-18 | 1.36E-17 | AAEL000771-PA OS=Aedes<br>aegypti GN=AAEL000771 PE=4<br>SV=1                                      |
| CCG009075.1 | 2592 | 137 | 40 | 2.27116267 | 0.53947958  | -2.073790784 | Down | 1.19E-18 | 4.56E-18 | AAEL002754-PA OS=Aedes<br>aegypti GN=AAEL002754 PE=4<br>SV=1                                      |
| CCG024148.1 | 381  | 145 | 40 | 16.3533111 | 3.670160291 | -2.155667791 | Down | 1.38E-20 | 5.43E-20 | -                                                                                                 |
| CCG010121.1 | 1983 | 147 | 40 | 3.18535098 | 0.70515939  | -2.175431046 | Down | 4.49E-21 | 1.77E-20 | AAEL012091-PA OS=Aedes<br>aegypti GN=AAEL012091 PE=3<br>SV=1                                      |
| CCG000099.1 | 357  | 147 | 40 | 17.6934201 | 3.916893756 | -2.175431046 | Down | 4.49E-21 | 1.77E-20 | -                                                                                                 |
| CCG021729.1 | 1503 | 156 | 40 | 4.45993253 | 0.930359994 | -2.26116092  | Down | 2.63E-23 | 1.05E-22 | AAEL012065-PA OS=Aedes<br>aegypti GN=AAEL012065 PE=4<br>SV=1                                      |
| CCG019873.1 | 543  | 160 | 40 | 12.6614319 | 2.575195342 | -2.297686796 | Down | 2.59E-24 | 1.05E-23 | -                                                                                                 |
| CCG013166.1 | 388  | 164 | 40 | 18.1624651 | 3.603946059 | -2.333310706 | Down | 2.50E-25 | 1.02E-24 | -                                                                                                 |
| CCG018913.1 | 1347 | 166 | 40 | 5.29545356 | 1.038107699 | -2.350798133 | Down | 7.73E-26 | 3.16E-25 | AAEL013648-PA OS=Aedes<br>aegypti GN=AAEL013648 PE=4<br>SV=1                                      |
| CCG003109.1 | 930  | 176 | 40 | 8.13190677 | 1.503581797 | -2.43519032  | Down | 2.03E-28 | 8.46E-28 | AAEL002088-PA OS=Aedes<br>aegypti GN=AAEL002088 PE=4<br>SV=1                                      |

|             |      |      |    |            |             |              |      |          |            |                                                                                     |
|-------------|------|------|----|------------|-------------|--------------|------|----------|------------|-------------------------------------------------------------------------------------|
| CCG014710.1 | 3438 | 178  | 40 | 2.22472739 | 0.40672806  | -2.451492132 | Down | 6.09E-29 | 2.56E-28   | AAEL009258-PA OS=Aedes aegypti GN=AAEL009258 PE=4 SV=1                              |
| CCG019115.1 | 1980 | 256  | 40 | 5.55568286 | 0.706227814 | -2.975758701 | Down | 2.23E-50 | 1.04E-49   | AAEL002173-PA OS=Aedes aegypti GN=AAEL002173 PE=4 SV=1                              |
| CCG011272.1 | 1012 | 258  | 40 | 10.9547347 | 1.38175007  | -2.986985957 | Down | 5.99E-51 | 2.80E-50   | -                                                                                   |
| CCG015508.1 | 1166 | 258  | 40 | 9.50788296 | 1.199254778 | -2.986985957 | Down | 5.99E-51 | 2.80E-50   | Homeotic protein span-major OS=Culex quinquefasciatus GN=CpipJ_CPIJ015319 PE=4 SV=1 |
| CCG015542.1 | 1704 | 292  | 40 | 7.36335828 | 0.820616826 | -3.16558326  | Down | 8.52E-61 | 4.13E-60   | AAEL005386-PA OS=Aedes aegypti GN=AAEL005386 PE=4 SV=1                              |
| CCG015945.1 | 573  | 1691 | 40 | 126.809461 | 2.440368361 | -5.699419646 | Down | 0        | 0          | AAEL008285-PA OS=Aedes aegypti GN=AAEL008285 PE=4 SV=1                              |
| CCG006476.1 | 704  | 0    | 41 | 0.001      | 2.035922369 | 10.99146684  | Up   | 2.77E-11 | 6.04E-11   | AGAP008251-PA OS=Anopheles gambiae GN=AGAP008251 PE=4 SV=3                          |
| CCG024174.1 | 1173 | 0    | 41 | 0.001      | 1.221900552 | 10.25491116  | Up   | 2.77E-11 | 6.04E-11   | AAEL009292-PA OS=Aedes aegypti GN=AAEL009292 PE=4 SV=1                              |
| CCG005660.1 | 591  | 2    | 41 | 0.14541365 | 2.425193482 | 4.059865208  | Up   | 9.36E-05 | 0.00015312 | AAEL013345-PA OS=Aedes aegypti GN=AAEL013345 PE=3 SV=1                              |
| CCG017625.1 | 435  | 3    | 41 | 0.296343   | 3.294918041 | 3.474902708  | Up   | 5.28E-05 | 8.83E-05   | AAEL002446-PA (Fragment) OS=Aedes aegypti GN=AAEL002446 PE=4 SV=1                   |
| CCG016386.2 | 435  | 3    | 41 | 0.296343   | 3.294918041 | 3.474902708  | Up   | 5.28E-05 | 8.82E-05   | AAEL005474-PA OS=Aedes aegypti GN=AAEL005474 PE=4 SV=1                              |
| CCG027118.1 | 1026 | 4    | 41 | 0.16752333 | 1.396968175 | 3.059865208  | Up   | 2.97E-05 | 5.05E-05   | Transcription initiation factor IIF large subunit OS=Aedes aegypti PE=2 SV=1        |
| CCG028057.1 | 1746 | 4    | 41 | 0.09844155 | 0.820898825 | 3.059865208  | Up   | 2.97E-05 | 5.05E-05   | -                                                                                   |
| CCG001448.1 | 527  | 6    | 41 | 0.48921899 | 2.719714132 | 2.474902708  | Up   | 1.17E-05 | 2.04E-05   | -                                                                                   |
| CCG006936.2 | 830  | 7    | 41 | 0.36239535 | 1.726854636 | 2.252510286  | Up   | 1.51E-05 | 2.62E-05   | AAEL006672-PA (Fragment) OS=Aedes aegypti GN=AAEL006672 PE=4 SV=1                   |
| CCG007759.1 | 945  | 7    | 41 | 0.31829433 | 1.516708304 | 2.252510286  | Up   | 1.51E-05 | 2.62E-05   | AAEL010768-PA OS=Aedes aegypti GN=AAEL010768 PE=3 SV=1                              |
| CCG016204.1 | 462  | 7    | 41 | 0.65105659 | 3.102357895 | 2.252510286  | Up   | 1.51E-05 | 2.62E-05   | -                                                                                   |

|             |      |     |    |            |             |              |      |           |            |                                                                                                               |
|-------------|------|-----|----|------------|-------------|--------------|------|-----------|------------|---------------------------------------------------------------------------------------------------------------|
| CCG019409.1 | 1569 | 8   | 41 | 0.21909361 | 0.913505002 | 2.059865208  | Up   | 3.35E-05  | 5.67E-05   | AGAP001625-PA OS=Anopheles gambiae GN=AgaP_AGAP001625 PE=4 SV=5                                               |
| CCG003916.1 | 927  | 8   | 41 | 0.37082835 | 1.546158951 | 2.059865208  | Up   | 3.35E-05  | 5.67E-05   | AAEL011493-PA OS=Aedes aegypti GN=AAEL011493 PE=4 SV=1                                                        |
| CCG018359.1 | 1266 | 8   | 41 | 0.27153071 | 1.132140085 | 2.059865208  | Up   | 3.35E-05  | 5.67E-05   | Four1 gag/pol protein OS=Zea mays GN=Fourf gag/pol PE=4 SV=1                                                  |
| CCG008129.1 | 4449 | 9   | 41 | 0.08692461 | 0.322159889 | 1.889940207  | Up   | 8.35E-05  | 0.0001377  | AAEL004216-PA OS=Aedes aegypti GN=AAEL004216 PE=4 SV=1                                                        |
| CCG007965.1 | 1392 | 10  | 41 | 0.30869062 | 1.029661888 | 1.737937114  | Up   | 0.0001998 | 0.00032121 | -                                                                                                             |
| CCG024133.1 | 1263 | 10  | 41 | 0.34021959 | 1.134829254 | 1.737937114  | Up   | 0.0001998 | 0.00032123 | AAEL006457-PA OS=Aedes aegypti GN=AAEL006457 PE=4 SV=1                                                        |
| CCG022678.1 | 1755 | 11  | 41 | 0.26932597 | 0.816689087 | 1.60043359   | Up   | 0.0004474 | 0.00070523 | AAEL013804-PA OS=Aedes aegypti GN=AAEL013804 PE=4 SV=1                                                        |
| CCG025727.1 | 441  | 11  | 41 | 1.07180744 | 3.250089224 | 1.60043359   | Up   | 0.0004474 | 0.00070527 | AAEL004609-PA OS=Aedes aegypti GN=AAEL004609 PE=4 SV=1                                                        |
| CCG011595.1 | 1002 | 86  | 41 | 3.68802113 | 1.430428491 | -1.366399546 | Down | 2.25E-07  | 4.26E-07   | AAEL002116-PA OS=Aedes aegypti GN=AAEL002116 PE=4 SV=1                                                        |
| CCG009405.1 | 1176 | 106 | 41 | 3.87312234 | 1.218783459 | -1.668055246 | Down | 2.52E-11  | 5.51E-11   | AAEL014658-PA OS=Aedes aegypti GN=AAEL014658 PE=3 SV=1                                                        |
| CCG019229.1 | 1469 | 108 | 41 | 3.15910915 | 0.975690502 | -1.695022294 | Down | 9.57E-12  | 2.13E-11   | AAEL007811-PA OS=Aedes aegypti GN=AAEL007811 PE=2 SV=1                                                        |
| CCG021137.1 | 1356 | 110 | 41 | 3.48574543 | 1.056998044 | -1.721494505 | Down | 3.59E-12  | 8.35E-12   | Protease (Reverse transcriptase) (Rnase h) (Integrase) (Fragment) OS=Drosophila melanogaster GN=pol PE=4 SV=1 |
| CCG003991.1 | 993  | 113 | 41 | 4.88980867 | 1.443393099 | -1.760313754 | Down | 8.12E-13  | 2.03E-12   | AAEL011454-PA OS=Aedes aegypti GN=AAEL011454 PE=4 SV=1                                                        |
| CCG000212.1 | 762  | 126 | 41 | 7.10523171 | 1.880957149 | -1.917414715 | Down | 1.04E-15  | 3.77E-15   | AGAP001753-PA OS=Anopheles gambiae GN=AGAP001753 PE=3 SV=4                                                    |
| CCG015351.1 | 888  | 128 | 41 | 6.19383562 | 1.614064581 | -1.940134792 | Down | 3.61E-16  | 1.35E-15   | AAEL009876-PA OS=Aedes aegypti GN=AAEL009876 PE=3 SV=1                                                        |
| CCG002014.1 | 1107 | 133 | 41 | 5.16257877 | 1.294750992 | -1.995417227 | Down | 2.51E-17  | 9.51E-17   | AAEL001262-PA OS=Aedes aegypti GN=AAEL001262 PE=4 SV=1                                                        |

|             |      |      |    |            |             |              |      |           |            |                                                                                          |
|-------------|------|------|----|------------|-------------|--------------|------|-----------|------------|------------------------------------------------------------------------------------------|
| CCG010416.1 | 1140 | 140  | 41 | 5.27698495 | 1.257271358 | -2.069417809 | Down | 5.57E-19  | 2.15E-18   | AAEL004935-PA OS=Aedes aegypti GN=AAEL004935 PE=4 SV=1                                   |
| CCG025428.1 | 2937 | 143  | 41 | 2.09215936 | 0.488011354 | -2.100006128 | Down | 1.07E-19  | 4.14E-19   | Putative uncharacterized protein OS=Culex quinquefasciatus GN=CpipJ_CPIJ002887 PE=4 SV=1 |
| CCG021356.1 | 2043 | 156  | 41 | 3.28109574 | 0.70156111  | -2.22553701  | Down | 7.05E-23  | 2.82E-22   | AAEL002880-PA OS=Aedes aegypti GN=AAEL002880 PE=3 SV=1                                   |
| CCG023110.1 | 528  | 182  | 41 | 14.8115373 | 2.714563158 | -2.447929432 | Down | 1.65E-29  | 6.94E-29   | AAEL005899-PA OS=Aedes aegypti GN=AAEL005899 PE=4 SV=1                                   |
| CCG014880.1 | 2070 | 195  | 41 | 4.04787355 | 0.692410313 | -2.547465105 | Down | 6.15E-33  | 2.63E-32   | AAEL011764-PA OS=Aedes aegypti GN=PPO10 PE=4 SV=1                                        |
| CCG008103.1 | 2991 | 208  | 41 | 2.98819953 | 0.479200718 | -2.64057451  | Down | 1.98E-36  | 8.66E-36   | AAEL000778-PA OS=Aedes aegypti GN=AAEL000778 PE=4 SV=1                                   |
| CCG001154.1 | 1284 | 442  | 41 | 14.7917622 | 1.116268962 | -3.728037351 | Down | 2.02E-105 | 1.08E-104  | AAEL014445-PA OS=Aedes aegypti GN=AAEL014445 PE=4 SV=1                                   |
| CCG015422.1 | 312  | 7820 | 41 | 1076.99784 | 4.593876114 | -7.873087684 | Down | 0         | 0          | AAEL001082-PA OS=Aedes aegypti GN=AAEL001082 PE=4 SV=1                                   |
| CCG002499.1 | 561  | 8603 | 41 | 658.945859 | 2.554882973 | -8.010758914 | Down | 0         | 0          | AAEL001683-PA OS=Aedes aegypti GN=AAEL001683 PE=4 SV=1                                   |
| CCG006563.1 | 375  | 0    | 42 | 0.001      | 3.915326998 | 11.93491709  | Up   | 1.53E-11  | 3.37E-11   | AAEL000138-PA OS=Aedes aegypti GN=AAEL000138 PE=4 SV=1                                   |
| CCG016735.1 | 381  | 0    | 42 | 0.001      | 3.853668306 | 11.91201669  | Up   | 1.53E-11  | 3.37E-11   | Putative uncharacterized protein OS=Culex quinquefasciatus GN=CpipJ_CPIJ004470 PE=4 SV=1 |
| CCG001867.2 | 789  | 0    | 42 | 0.001      | 1.860896862 | 10.86178238  | Up   | 1.53E-11  | 3.37E-11   | AAEL008206-PA OS=Aedes aegypti GN=AAEL008206 PE=3 SV=1                                   |
| CCG003928.1 | 1276 | 0    | 42 | 0.001      | 1.150664282 | 10.16825126  | Up   | 1.53E-11  | 3.37E-11   | AAEL012229-PA OS=Aedes aegypti GN=AAEL012229 PE=4 SV=1                                   |
| CCG002600.1 | 1395 | 0    | 42 | 0.001      | 1.052507258 | 10.03961447  | Up   | 1.53E-11  | 3.37E-11   | Beta-galactosidase OS=Aedes aegypti GN=AAEL004575 PE=3 SV=1                              |
| CCG010902.1 | 4749 | 0    | 42 | 0.001      | 0.309169851 | 8.272255832  | Up   | 1.53E-11  | 3.37E-11   | AAEL008384-PA OS=Aedes aegypti GN=AAEL008384 PE=3 SV=1                                   |
| CCG020265.1 | 336  | 1    | 42 | 0.12788611 | 4.369784597 | 5.094630627  | Up   | 0.000587  | 0.00091848 | -                                                                                        |

|             |      |    |    |            |             |              |      |           |            |                                                                                          |
|-------------|------|----|----|------------|-------------|--------------|------|-----------|------------|------------------------------------------------------------------------------------------|
| CCG026612.1 | 2073 | 2  | 42 | 0.04145657 | 0.708271888 | 4.094630627  | Up   | 9.36E-05  | 0.00015313 | Polyribonucleotide nucleotidyltransferase OS=Wolbachia pipientis wAlbB GN=ppn PE=3 SV=1  |
| CCG026267.1 | 516  | 3  | 42 | 0.24982404 | 2.845441133 | 3.509668126  | Up   | 5.28E-05  | 8.83E-05   | AAEL010115-FA OS=Aedes aegypti GN=AAEL010115 PE=4 SV=1                                   |
| CCG011317.1 | 501  | 3  | 42 | 0.2573038  | 2.930633981 | 3.509668126  | Up   | 5.28E-05  | 8.83E-05   | AAEL002679-FA OS=Aedes aegypti GN=AAEL002679 PE=4 SV=1                                   |
| CCG000654.1 | 1566 | 6  | 42 | 0.164635   | 0.937578304 | 2.509668126  | Up   | 1.05E-05  | 1.83E-05   | AAEL013489-FA OS=Aedes aegypti GN=AAEL013489 PE=4 SV=1                                   |
| CCG005619.1 | 555  | 7  | 42 | 0.54196062 | 2.645491215 | 2.287275705  | Up   | 1.12E-05  | 1.95E-05   | AAEL010576-FA OS=Aedes aegypti GN=AAEL010576 PE=4 SV=1                                   |
| CCG006743.1 | 666  | 8  | 42 | 0.51615297 | 2.204576013 | 2.094630627  | Up   | 2.25E-05  | 3.87E-05   | AAEL003678-FA OS=Aedes aegypti GN=AAEL003678 PE=3 SV=1                                   |
| CCG026528.1 | 901  | 8  | 42 | 0.38152928 | 1.62957561  | 2.094630627  | Up   | 2.25E-05  | 3.87E-05   | Putative uncharacterized protein OS=Culex quinquefasciatus GN=CpipJ_CPIJ016207 PE=4 SV=1 |
| CCG009721.2 | 1605 | 8  | 42 | 0.21417936 | 0.914796028 | 2.094630627  | Up   | 2.25E-05  | 3.87E-05   | AAEL002349-FA OS=Aedes aegypti GN=AAEL002349 PE=4 SV=1                                   |
| CCG012292.1 | 804  | 10 | 42 | 0.53444944 | 1.826178637 | 1.772702532  | Up   | 0.0001349 | 0.00021874 | -                                                                                        |
| CCG006637.1 | 2413 | 10 | 42 | 0.17807598 | 0.608473943 | 1.772702532  | Up   | 0.0001349 | 0.00021873 | AAEL014411-FA OS=Aedes aegypti GN=CYP304B3 PE=3 SV=1                                     |
| CCG008067.1 | 496  | 11 | 42 | 0.95295782 | 2.960176662 | 1.635199008  | Up   | 0.0003071 | 0.00048823 | Putative uncharacterized protein OS=Aedes albopictus PE=2 SV=1                           |
| CCG017265.1 | 351  | 69 | 42 | 8.44704185 | 4.183041665 | -1.01389383  | Down | 0.00026   | 0.00041577 | AAEL006854-FA OS=Aedes aegypti GN=AAEL006854 PE=4 SV=1                                   |
| CCG000984.1 | 3125 | 70 | 42 | 0.96252206 | 0.46983924  | -1.03465239  | Down | 0.0001836 | 0.00029561 | 5-hydroxytryptamine 7 receptor OS=Aedes aegypti PE=2 SV=1                                |
| CCG004113.1 | 663  | 72 | 42 | 4.66639652 | 2.21455147  | -1.075294375 | Down | 9.02E-05  | 0.00014863 | -                                                                                        |
| CCG026599.1 | 1023 | 78 | 42 | 3.27628475 | 1.43523717  | -1.190771592 | Down | 9.60E-06  | 1.68E-05   | AAEL015331-FA OS=Aedes aegypti GN=AAEL015331 PE=4 SV=1                                   |
| CCG015745.1 | 2579 | 81 | 42 | 1.3495729  | 0.569308889 | -1.245219376 | Down | 2.96E-06  | 5.33E-06   | AAEL005669-FA OS=Aedes aegypti GN=AAEL005669 PE=4 SV=1                                   |
| CCG028638.1 | 1571 | 89 | 42 | 2.43431342 | 0.934594287 | -1.381102804 | Down | 1.09E-07  | 2.09E-07   | GK10815 OS=Drosophila willistoni GN=GK10815 PE=4 SV=1                                    |

|             |      |     |    |            |             |              |      |           |           |                                                                                                                           |
|-------------|------|-----|----|------------|-------------|--------------|------|-----------|-----------|---------------------------------------------------------------------------------------------------------------------------|
| CCG022383.1 | 543  | 103 | 42 | 8.1507968  | 2.703955109 | -1.591869901 | Down | 2.06E-10  | 4.35E-10  | AAEL011859-PA OS=Aedes aegypti GN=AAEL011859 PE=4 SV=1                                                                    |
| CCG012819.1 | 2928 | 112 | 42 | 1.64365105 | 0.501450691 | -1.712724295 | Down | 2.75E-12  | 6.46E-12  | AAEL003305-PA OS=Aedes aegypti GN=AAEL003305 PE=4 SV=1                                                                    |
| CCG014993.1 | 702  | 132 | 42 | 8.07977916 | 2.091520833 | -1.949763493 | Down | 9.93E-17  | 3.74E-16  | AAEL002447-PA OS=Aedes aegypti GN=AAEL002447 PE=4 SV=1                                                                    |
| CCG000299.1 | 1752 | 140 | 42 | 3.43365459 | 0.838040882 | -2.03465239  | Down | 1.35E-18  | 5.19E-18  | AAEL009856-PA OS=Aedes aegypti GN=AAEL009856 PE=4 SV=1                                                                    |
| CCG015044.1 | 1713 | 141 | 42 | 3.53691336 | 0.857120621 | -2.044920726 | Down | 7.82E-19  | 3.01E-18  | AAEL005345-PA OS=Aedes aegypti GN=AAEL005345 PE=4 SV=1                                                                    |
| CCG002700.1 | 1089 | 150 | 42 | 5.91869623 | 1.348253099 | -2.134188064 | Down | 5.43E-21  | 2.14E-20  | Predicted protein OS=Culex quinquefasciatus GN=CpipJ_CPIJ004376 PE=4 SV=1                                                 |
| CCG016334.1 | 1248 | 187 | 42 | 6.43857402 | 1.176480468 | -2.452263833 | Down | 2.45E-30  | 1.03E-29  | AAEL003093-PA OS=Aedes aegypti GN=AAEL003093 PE=4 SV=1                                                                    |
| CCG015680.1 | 1943 | 188 | 42 | 4.15764802 | 0.755660126 | -2.459958225 | Down | 1.34E-30  | 5.67E-30  | AAEL008483-PA OS=Aedes aegypti GN=AAEL008483 PE=4 SV=1                                                                    |
| CCG000972.1 | 1626 | 224 | 42 | 5.91956984 | 0.902981319 | -2.712724295 | Down | 2.94E-40  | 1.31E-39  | AAEL011699-PA OS=Aedes aegypti GN=AAEL011699 PE=4 SV=1                                                                    |
| CCG024739.1 | 2370 | 239 | 42 | 4.33323484 | 0.619513766 | -2.806236181 | Down | 2.09E-44  | 9.53E-44  | AAEL008831-PA OS=Aedes aegypti GN=AAEL008831 PE=4 SV=1                                                                    |
| CCG026524.1 | 1128 | 350 | 42 | 13.3328077 | 1.301637965 | -3.356580485 | Down | 1.31E-76  | 6.62E-76  | AAEL009359-PA OS=Aedes aegypti GN=AAEL009359 PE=4 SV=1                                                                    |
| CCG025866.1 | 498  | 373 | 42 | 32.1841587 | 2.948288402 | -3.448401194 | Down | 1.59E-83  | 8.15E-83  | AAEL008069-PA OS=Aedes aegypti GN=AAEL008069 PE=4 SV=1                                                                    |
| CCG007865.1 | 888  | 698 | 42 | 33.7757599 | 1.65343201  | -4.3524526   | Down | 9.60E-186 | 5.67E-185 | AAEL000762-PA OS=Aedes aegypti GN=AAEL000762 PE=4 SV=1                                                                    |
| CCG012033.1 | 315  | 0   | 43 | 0.001      | 4.772082226 | 12.22040319  | Up   | 8.43E-12  | 1.88E-11  | AAEL013514-PA OS=Aedes aegypti GN=AAEL013514 PE=4 SV=1                                                                    |
| CCG010138.1 | 375  | 0   | 43 | 0.001      | 4.00854907  | 11.96886442  | Up   | 8.43E-12  | 1.88E-11  | Chromosome undetermined SCAF14565, whole genome shotgun sequence OS=Tetraodon nigroviridis GN=GSTENG00016696001 PE=3 SV=1 |

|             |      |    |    |            |             |             |    |           |            |                                                                                                   |
|-------------|------|----|----|------------|-------------|-------------|----|-----------|------------|---------------------------------------------------------------------------------------------------|
| CCG011485.1 | 787  | 0  | 43 | 0.001      | 1.910045618 | 10.89939138 | Up | 8.43E-12  | 1.88E-11   | -                                                                                                 |
| CCG005993.1 | 810  | 0  | 43 | 0.001      | 1.855809755 | 10.85783311 | Up | 8.43E-12  | 1.88E-11   | Putative uncharacterized protein<br>OS=Culex quinquefasciatus<br>GN=CpipJ_CPIJ017971 PE=4<br>SV=1 |
| CCG004266.1 | 993  | 0  | 43 | 0.001      | 1.513802519 | 10.5639613  | Up | 8.43E-12  | 1.88E-11   | Putative uncharacterized protein<br>OS=Culex quinquefasciatus<br>GN=CpipJ_CPIJ005433 PE=4<br>SV=1 |
| CCG002818.1 | 709  | 1  | 43 | 0.06060611 | 2.120177576 | 5.128577959 | Up | 0.000587  | 0.00091575 | -                                                                                                 |
| CCG019318.1 | 471  | 1  | 43 | 0.09123086 | 3.19151996  | 5.128577959 | Up | 0.000587  | 0.0009166  | AAEL000670-PA OS=Aedes<br>aegypti GN=AAEL006670 PE=4<br>SV=1                                      |
| CCG011361.1 | 1464 | 1  | 43 | 0.02935091 | 1.026779987 | 5.128577959 | Up | 0.000587  | 0.00091825 | AAEL004200-PA OS=Aedes<br>aegypti GN=AAEL004206 PE=4<br>SV=1                                      |
| CCG024031.1 | 633  | 2  | 43 | 0.13576535 | 2.374732861 | 4.128577959 | Up | 9.36E-05  | 0.00015313 | AAEL004662-PA OS=Aedes<br>aegypti GN=AAEL004662 PE=4<br>SV=1                                      |
| CCG020209.1 | 2046 | 3  | 43 | 0.06300548 | 0.734704742 | 3.543615458 | Up | 5.28E-05  | 8.83E-05   | AAEL002537-PA OS=Aedes<br>aegypti GN=AAEL002537 PE=4<br>SV=1                                      |
| CCG012437.1 | 639  | 3  | 43 | 0.20173584 | 2.3524349   | 3.543615458 | Up | 5.28E-05  | 8.83E-05   | AAEL007809-PA OS=Aedes<br>aegypti GN=AAEL007809 PE=4<br>SV=1                                      |
| CCG021924.1 | 519  | 5  | 43 | 0.41396661 | 2.896350484 | 2.806649864 | Up | 1.63E-05  | 2.81E-05   | AAEL000267-PB OS=Aedes<br>aegypti GN=AAEL000267 PE=4<br>SV=1                                      |
| CCG006735.1 | 973  | 5  | 43 | 0.22081056 | 1.544918706 | 2.806649864 | Up | 1.63E-05  | 2.81E-05   | -                                                                                                 |
| CCG022311.1 | 1137 | 6  | 43 | 0.22675322 | 1.322080828 | 2.543615458 | Up | 9.67E-06  | 1.69E-05   | Putative uncharacterized protein<br>OS=Tribolium castaneum<br>GN=TcasGA2_TC004227 PE=4<br>SV=1    |
| CCG012211.1 | 1233 | 7  | 43 | 0.24394821 | 1.219145094 | 2.321223036 | Up | 8.69E-06  | 1.52E-05   | AAEL000285-PA OS=Aedes<br>aegypti GN=AAEL000285 PE=4<br>SV=1                                      |
| CCG016592.1 | 660  | 8  | 43 | 0.52084527 | 2.277584699 | 2.128577959 | Up | 1.54E-05  | 2.66E-05   | AAEL000414-PA OS=Aedes<br>aegypti GN=AAEL000414 PE=3<br>SV=1                                      |
| CCG010253.1 | 1218 | 8  | 43 | 0.28223143 | 1.234159196 | 2.128577959 | Up | 1.54E-05  | 2.66E-05   | AAEL000009-PA OS=Aedes<br>aegypti GN=AAEL000009 PE=4<br>SV=1                                      |
| CCG014439.1 | 977  | 9  | 43 | 0.39583174 | 1.538593553 | 1.958652957 | Up | 3.71E-05  | 6.26E-05   | -                                                                                                 |
| CCG012173.1 | 1880 | 11 | 43 | 0.25141866 | 0.799577607 | 1.66914634  | Up | 0.0002099 | 0.00033707 | AAEL004635-PA OS=Aedes<br>aegypti GN=AAEL004635 PE=4<br>SV=1                                      |



|             |      |     |    |            |             |              |      |           |            |                                                                                          |
|-------------|------|-----|----|------------|-------------|--------------|------|-----------|------------|------------------------------------------------------------------------------------------|
| CCG012234.1 | 1950 | 11  | 43 | 0.24239337 | 0.770874821 | 1.66914634   | Up   | 0.0002099 | 0.00033702 | AAEL010512-PA OS=Aedes aegypti GN=AAEL010512 PE=4 SV=1                                   |
| CCG028424.1 | 2501 | 11  | 43 | 0.18899124 | 0.601041944 | 1.66914634   | Up   | 0.0002099 | 0.000337   | BEL12_AG transposon polyprotein OS=Anopheles gambiae GN=BEL12-AG transposon PE=4 SV=1    |
| CCG025339.1 | 2357 | 11  | 43 | 0.20053758 | 0.637762368 | 1.66914634   | Up   | 0.0002099 | 0.00033705 | Putative uncharacterized protein OS=Tribolium castaneum GN=TcasGA2_TC004811 PE=4 SV=1    |
| CCG004864.1 | 1650 | 12  | 43 | 0.31250716 | 0.91103388  | 1.543615458  | Up   | 0.0004553 | 0.0007173  | AAEL001996-PA OS=Aedes aegypti GN=AAEL001996 PE=4 SV=1                                   |
| CCG003790.1 | 878  | 12  | 43 | 0.58728567 | 1.712079614 | 1.543615458  | Up   | 0.0004553 | 0.00071735 | AAEL0008790-PA OS=Aedes aegypti GN=AAEL008790 PE=4 SV=1                                  |
| CCG012441.1 | 1149 | 77  | 43 | 2.87960798 | 1.308273195 | -1.138208582 | Down | 2.23E-05  | 3.82E-05   | AAEL011987-PA OS=Aedes aegypti GN=AAEL011987 PE=4 SV=1                                   |
| CCG024689.1 | 1347 | 78  | 43 | 2.48822517 | 1.115965777 | -1.15682426  | Down | 1.53E-05  | 2.65E-05   | AAEL000250-PA OS=Aedes aegypti GN=AAEL000250 PE=4 SV=1                                   |
| CCG006568.1 | 324  | 79  | 43 | 10.4771884 | 4.639524386 | -1.17520279  | Down | 1.04E-05  | 1.83E-05   | Putative uncharacterized protein OS=Culex quinquefasciatus GN=CpipJ_CPIJ014977 PE=4 SV=1 |
| CCG021360.1 | 1677 | 90  | 43 | 2.30606805 | 0.896366071 | -1.363275138 | Down | 1.24E-07  | 2.37E-07   | AAEL009616-PA OS=Aedes aegypti GN=AAEL009616 PE=4 SV=1                                   |
| CCG004831.1 | 393  | 130 | 43 | 14.2139071 | 3.824951403 | -1.893789855 | Down | 6.43E-16  | 2.35E-15   | AAEL010108-PA OS=Aedes aegypti GN=AAEL010108 PE=4 SV=1                                   |
| CCG007841.1 | 420  | 139 | 43 | 14.220936  | 3.57906167  | -1.990363114 | Down | 5.49E-18  | 2.10E-17   | AAEL002811-PA OS=Aedes aegypti GN=AAEL002811 PE=4 SV=1                                   |
| CCG004846.1 | 903  | 151 | 43 | 7.1854152  | 1.664679846 | -2.109826781 | Down | 7.81E-21  | 3.07E-20   | AAEL0006477-PA OS=Aedes aegypti GN=AAEL006477 PE=4 SV=1                                  |
| CCG018838.1 | 1215 | 157 | 43 | 5.55246776 | 1.237206503 | -2.16604279  | Down | 2.73E-22  | 1.08E-21   | AAEL003566-PA OS=Aedes aegypti GN=AAEL003566 PE=4 SV=1                                   |
| CCG025243.1 | 1512 | 164 | 43 | 4.66073841 | 0.994183797 | -2.228974046 | Down | 5.12E-24  | 2.06E-23   | AAEL009757-PA OS=Aedes aegypti GN=AAEL009757 PE=4 SV=1                                   |
| CCG005976.1 | 843  | 181 | 43 | 9.2260047  | 1.783162398 | -2.371267929 | Down | 2.58E-28  | 1.08E-27   | AAEL001301-PA OS=Aedes aegypti GN=AAEL001301 PE=4 SV=1                                   |

|             |      |      |    |            |             |              |      |           |            |                                                                                          |
|-------------|------|------|----|------------|-------------|--------------|------|-----------|------------|------------------------------------------------------------------------------------------|
| CCG015280.1 | 2310 | 189  | 43 | 3.51570556 | 0.650738485 | -2.433664466 | Down | 2.20E-30  | 9.31E-30   | AAEL005681-PA OS=Aedes aegypti GN=GPRHIS PE=4 SV=2                                       |
| CCG001595.2 | 1908 | 200  | 43 | 4.50416505 | 0.787843764 | -2.515278231 | Down | 2.86E-33  | 1.23E-32   | AAEL009410-PA OS=Aedes aegypti GN=AAEL009410 PE=4 SV=1                                   |
| CCG016827.1 | 3096 | 251  | 43 | 3.48365742 | 0.485531622 | -2.842965595 | Down | 3.46E-47  | 1.60E-46   | Putative uncharacterized protein OS=Culex quinquefasciatus GN=CpipJ_CPIJ008110 PE=4 SV=1 |
| CCG011527.1 | 753  | 265  | 43 | 15.122151  | 1.996289377 | -2.921270591 | Down | 3.93E-51  | 1.84E-50   | AAEL001235-PA OS=Aedes aegypti GN=AAEL001235 PE=4 SV=1                                   |
| CCG004982.1 | 825  | 339  | 43 | 17.6566546 | 1.822067759 | -3.276563505 | Down | 1.24E-72  | 6.20E-72   | AAEL005386-PA OS=Aedes aegypti GN=AAEL005386 PE=4 SV=1                                   |
| CCG025361.1 | 1677 | 951  | 43 | 24.3674524 | 0.896366071 | -4.764723572 | Down | 3.11E-267 | 1.93E-266  | AAEL009236-PA OS=Aedes aegypti GN=AAEL009236 PE=3 SV=1                                   |
| CCG026334.1 | 426  | 1901 | 43 | 191.749919 | 3.52865235  | -5.763964858 | Down | 0         | 0          | AAEL011504-PA OS=Aedes aegypti GN=AAEL011504 PE=4 SV=1                                   |
| CCG027096.1 | 462  | 0    | 44 | 0.001      | 3.329359693 | 11.70102903  | Up   | 4.65E-12  | 1.06E-11   | AAEL002671-PA OS=Aedes aegypti GN=AAEL002671 PE=4 SV=1                                   |
| CCG023894.1 | 768  | 0    | 44 | 0.001      | 2.00281794  | 10.96781557  | Up   | 4.65E-12  | 1.06E-11   | -                                                                                        |
| CCG022914.1 | 1206 | 0    | 44 | 0.001      | 1.27542635  | 10.31676388  | Up   | 4.65E-12  | 1.06E-11   | AAEL010627-PA OS=Aedes aegypti GN=AAEL010627 PE=4 SV=1                                   |
| CCG014180.1 | 1566 | 0    | 44 | 0.001      | 0.98222489  | 9.939909572  | Up   | 4.65E-12  | 1.06E-11   | AAEL002627-PA OS=Aedes aegypti GN=AAEL002627 PE=4 SV=1                                   |
| CCG025596.1 | 2079 | 0    | 44 | 0.001      | 0.739857709 | 9.531104026  | Up   | 4.65E-12  | 1.06E-11   | AAEL013981-PA OS=Aedes aegypti GN=AAEL013981 PE=4 SV=1                                   |
| CCG009728.1 | 4575 | 0    | 44 | 0.001      | 0.336210749 | 8.393222041  | Up   | 4.65E-12  | 1.06E-11   | AAEL000067-PA OS=Aedes aegypti GN=AAEL000067 PE=4 SV=1                                   |
| CCG005063.1 | 1096 | 1    | 44 | 0.03920596 | 1.403434469 | 5.161744822  | Up   | 0.000587  | 0.00091746 | -                                                                                        |
| CCG016559.1 | 2223 | 2    | 44 | 0.03865923 | 0.691931704 | 4.161744822  | Up   | 9.36E-05  | 0.00015314 | AAEL002752-PA OS=Aedes aegypti GN=AAEL002752 PE=4 SV=1                                   |
| CCG008314.1 | 323  | 2    | 44 | 0.26606647 | 4.762118198 | 4.161744822  | Up   | 9.36E-05  | 0.00015315 | AAEL000278-PA (Fragment) OS=Aedes aegypti GN=AAEL000278 PE=3 SV=1                        |
| CCG017568.1 | 219  | 3    | 44 | 0.5886265  | 7.023580721 | 3.576782322  | Up   | 5.28E-05  | 8.83E-05   | AAEL006867-PA OS=Aedes aegypti GN=AAEL006867 PE=4 SV=1                                   |

|             |      |    |    |            |             |              |      |           |            |                                                                                                |
|-------------|------|----|----|------------|-------------|--------------|------|-----------|------------|------------------------------------------------------------------------------------------------|
| CCG004534.1 | 703  | 4  | 44 | 0.24449351 | 2.188000253 | 3.161744822  | Up   | 2.96E-05  | 5.03E-05   | Putative uncharacterized protein<br>OS=Tribolium castaneum<br>GN=TcasGA2_TC004227 PE=4<br>SV=1 |
| CCG003736.1 | 1628 | 4  | 44 | 0.10557674 | 0.944818291 | 3.161744822  | Up   | 2.96E-05  | 5.03E-05   | Putative uncharacterized protein<br>OS=Aedes aegypti PE=4 SV=1                                 |
| CCG020303.1 | 1299 | 4  | 44 | 0.13231635 | 1.184114071 | 3.161744822  | Up   | 2.96E-05  | 5.03E-05   | AAEL007774-PA OS=Aedes<br>aegypti GN=AAEL007774 PE=4<br>SV=1                                   |
| CCG015092.1 | 616  | 7  | 44 | 0.48829244 | 2.497019769 | 2.3543899    | Up   | 7.09E-06  | 1.25E-05   | -                                                                                              |
| CCG010235.2 | 879  | 7  | 44 | 0.34219356 | 1.749902364 | 2.3543899    | Up   | 7.09E-06  | 1.25E-05   | AAEL006902-PA OS=Aedes<br>aegypti GN=AAEL006902 PE=3<br>SV=1                                   |
| CCG008092.1 | 2273 | 8  | 44 | 0.15123532 | 0.676711033 | 2.161744822  | Up   | 1.07E-05  | 1.87E-05   | -                                                                                              |
| CCG001786.1 | 369  | 8  | 44 | 0.93159316 | 4.168466607 | 2.161744822  | Up   | 1.07E-05  | 1.87E-05   | -                                                                                              |
| CCG000632.1 | 630  | 8  | 44 | 0.54564742 | 2.441530441 | 2.161744822  | Up   | 1.07E-05  | 1.87E-05   | AAEL010719-PA OS=Aedes<br>aegypti GN=AAEL010719 PE=4<br>SV=1                                   |
| CCG000703.1 | 921  | 8  | 44 | 0.37324417 | 1.670102256 | 2.161744822  | Up   | 1.07E-05  | 1.87E-05   | -                                                                                              |
| CCG019126.1 | 424  | 8  | 44 | 0.81074971 | 3.627745703 | 2.161744822  | Up   | 1.07E-05  | 1.87E-05   | AAEL000639-PA OS=Aedes<br>aegypti GN=AAEL000639 PE=3<br>SV=1                                   |
| CCG003311.1 | 1611 | 9  | 44 | 0.24005438 | 0.954788441 | 1.991819821  | Up   | 2.48E-05  | 4.24E-05   | AAEL012240-PA (Fragment)<br>OS=Aedes aegypti<br>GN=AAEL012240 PE=4 SV=1                        |
| CCG026530.1 | 525  | 10 | 44 | 0.81847114 | 2.929836529 | 1.839816728  | Up   | 6.09E-05  | 0.00010126 | Putative uncharacterized protein<br>OS=Aedes triseriatus PE=2 SV=1                             |
| CCG006890.1 | 2274 | 10 | 44 | 0.18896101 | 0.676413447 | 1.839816728  | Up   | 6.09E-05  | 0.00010126 | AAEL007619-PA OS=Aedes<br>aegypti GN=TOLL5A PE=4 SV=1                                          |
| CCG020659.1 | 1089 | 12 | 44 | 0.4734957  | 1.412455627 | 1.576782322  | Up   | 0.0003151 | 0.00050057 | AAEL012796-PA (Fragment)<br>OS=Aedes aegypti<br>GN=GPRGHP3 PE=3 SV=2                           |
| CCG003791.1 | 2505 | 75 | 44 | 1.286519   | 0.614037596 | -1.067073868 | Down | 7.14E-05  | 0.0001183  | AAEL001936-PA OS=Aedes<br>aegypti GN=AAEL001936 PE=4<br>SV=1                                   |
| CCG006015.1 | 642  | 83 | 44 | 5.55527722 | 2.395894358 | -1.213294609 | Down | 3.57E-06  | 6.41E-06   | AAEL014966-PA OS=Aedes<br>aegypti GN=AAEL014966 PE=4<br>SV=1                                   |
| CCG012451.1 | 1071 | 89 | 44 | 3.57078093 | 1.436194377 | -1.313988609 | Down | 3.21E-07  | 6.03E-07   | Uncharacterized protein<br>OS=Anopheles darlingi<br>GN=AND_05802 PE=4 SV=1                     |

|             |      |        |    |            |             |              |      |           |           |                                                                                          |
|-------------|------|--------|----|------------|-------------|--------------|------|-----------|-----------|------------------------------------------------------------------------------------------|
| CCG009257.1 | 1485 | 89     | 44 | 2.57529049 | 1.035800793 | -1.313988609 | Down | 3.21E-07  | 6.03E-07  | AAEL014343-PA OS=Aedes aegypti GN=AAEL014343 PE=4 SV=1                                   |
| CCG001782.1 | 757  | 97     | 44 | 5.5060294  | 2.031920975 | -1.43816802  | Down | 1.07E-08  | 2.14E-08  | Putative uncharacterized protein OS=Culex quinquefasciatus GN=CpipJ_CPIJ016435 PE=4 SV=1 |
| CCG021422.1 | 1416 | 107    | 44 | 3.24700678 | 1.086274137 | -1.579722164 | Down | 1.17E-10  | 2.49E-10  | -                                                                                        |
| CCG009480.1 | 1581 | 123    | 44 | 3.34299643 | 0.972905868 | -1.780769683 | Down | 5.02E-14  | 1.69E-13  | AAEL004979-PA OS=Aedes aegypti GN=CLIPD2 PE=3 SV=1                                       |
| CCG000388.1 | 1434 | 132    | 44 | 3.95537306 | 1.072638897 | -1.882649297 | Down | 5.05E-16  | 1.85E-15  | AAEL010386-PA (Fragment) OS=Aedes aegypti GN=AAEL010386 PE=3 SV=1                        |
| CCG002750.1 | 873  | 148    | 44 | 7.28467437 | 1.761929184 | -2.047708543 | Down | 1.00E-19  | 3.89E-19  | AAEL002088-PA OS=Aedes aegypti GN=AAEL002088 PE=4 SV=1                                   |
| CCG011013.1 | 615  | 162    | 44 | 11.3188569 | 2.501079964 | -2.17810518  | Down | 4.19E-23  | 1.68E-22  | AAEL013220-PA OS=Aedes aegypti GN=AAEL013220 PE=4 SV=1                                   |
| CCG027561.1 | 357  | 196    | 44 | 23.5912268 | 4.308583132 | -2.452965022 | Down | 9.86E-32  | 4.20E-31  | AAEL011392-PA OS=Aedes aegypti GN=AAEL011392 PE=4 SV=1                                   |
| CCG004110.1 | 1623 | 210    | 44 | 5.55985476 | 0.947729007 | -2.552500695 | Down | 1.99E-35  | 8.65E-35  | AAEL015586-PA OS=Aedes aegypti GN=AAEL015586 PE=4 SV=1                                   |
| CCG002641.1 | 1322 | 216    | 44 | 7.02077358 | 1.163512994 | -2.59314268  | Down | 4.94E-37  | 2.17E-36  | Putative uncharacterized protein OS=Culex quinquefasciatus GN=CpipJ_CPIJ010318 PE=4 SV=1 |
| CCG008468.1 | 411  | 306    | 44 | 31.9920652 | 3.742491917 | -3.09564302  | Down | 2.79E-62  | 1.36E-61  | Olfant-binding protein 30a OS=Culex quinquefasciatus GN=CpipJ_CPIJ001872 PE=4 SV=1       |
| CCG004016.1 | 7014 | 404    | 44 | 2.47501751 | 0.219299141 | -3.49646666  | Down | 1.98E-91  | 1.03E-90  | AAEL002204-PA OS=Aedes aegypti GN=AAEL002204 PE=4 SV=1                                   |
| CCG007600.1 | 2472 | 490    | 44 | 8.51746358 | 0.6222347   | -3.774893117 | Down | 7.13E-118 | 3.89E-117 | AAEL013750-PA OS=Aedes aegypti GN=AAEL013750 PE=4 SV=1                                   |
| CCG015085.1 | 1005 | 818    | 44 | 34.9743711 | 1.53051162  | -4.51421221  | Down | 1.23E-222 | 7.46E-222 | AAEL007500-PA OS=Aedes aegypti GN=AAEL007500 PE=4 SV=1                                   |
| CCG021117.1 | 1449 | 902    | 44 | 26.7485857 | 1.061534974 | -4.655238801 | Down | 4.61E-250 | 2.84E-249 | AAEL012370-PA OS=Aedes aegypti GN=AAEL012370 PE=3 SV=1                                   |
| CCG015657.1 | 1131 | 437487 | 44 | 16621.3088 | 1.360003694 | -13.5771358  | Down | 0         | 0         | AAEL003888-PA OS=Aedes aegypti GN=AAEL003888 PE=4 SV=1                                   |

|             |      |     |    |            |             |              |      |           |            |                                                                                       |
|-------------|------|-----|----|------------|-------------|--------------|------|-----------|------------|---------------------------------------------------------------------------------------|
| CCG001643.1 | 940  | 0   | 45 | 0.001      | 1.673534526 | 10.7086826   | Up   | 2.56E-12  | 6.04E-12   | AAEL000739-PA OS=Aedes aegypti GN=AAEL000739 PE=4 SV=1                                |
| CCG025283.1 | 3675 | 5   | 45 | 0.05846222 | 0.428060532 | 2.872238205  | Up   | 1.61E-05  | 2.78E-05   | Polyprotein OS=Antheraea mylitta PE=4 SV=1                                            |
| CCG024000.1 | 734  | 6   | 45 | 0.35125124 | 2.143218603 | 2.609203799  | Up   | 8.88E-06  | 1.56E-05   | AAEL000795-PA OS=Aedes aegypti GN=AAEL008795 PE=4 SV=1                                |
| CCG015350.1 | 1888 | 6   | 45 | 0.13655636 | 0.833221639 | 2.609203799  | Up   | 8.88E-06  | 1.56E-05   | Putative uncharacterized protein OS=Tribolium castaneum GN=TcasGA2_TC001846 PE=4 SV=1 |
| CCG010915.1 | 1312 | 6   | 45 | 0.19650793 | 1.199026261 | 2.609203799  | Up   | 8.88E-06  | 1.56E-05   | Putative gag-pol protein OS=Drosophila ananassae PE=4 SV=1                            |
| CCG010568.1 | 1476 | 9   | 45 | 0.26201058 | 1.065801121 | 2.024241299  | Up   | 1.66E-05  | 2.86E-05   | AAEL014019-PA OS=Aedes aegypti GN=CYP4J17 PE=3 SV=2                                   |
| CCG015082.1 | 952  | 9   | 45 | 0.40622648 | 1.652439553 | 2.024241299  | Up   | 1.66E-05  | 2.86E-05   | GD14791 OS=Drosophila simulans GN=GD14791 PE=4 SV=1                                   |
| CCG004054.1 | 1514 | 11  | 45 | 0.31219754 | 1.039050499 | 1.734734682  | Up   | 9.70E-05  | 0.00015831 | Uncharacterized protein OS=Anopheles darlingi GN=AND_05226 PE=4 SV=1                  |
| CCG003999.1 | 2229 | 11  | 45 | 0.21205342 | 0.705752559 | 1.734734682  | Up   | 9.70E-05  | 0.00015832 | AAEL010614-PA OS=Aedes aegypti GN=AAEL010614 PE=4 SV=1                                |
| CCG009598.1 | 282  | 12  | 45 | 1.82849935 | 5.578448421 | 1.609203799  | Up   | 0.0002172 | 0.00034839 | AAEL010577-PA OS=Aedes aegypti GN=AAEL010577 PE=4 SV=1                                |
| CCG011727.1 | 2078 | 13  | 45 | 0.26881932 | 0.757036792 | 1.493726582  | Up   | 0.000458  | 0.00072143 | Uncharacterized protein OS=Anopheles darlingi GN=AND_21982 PE=4 SV=1                  |
| CCG016347.1 | 2913 | 89  | 45 | 1.31284119 | 0.540035172 | -1.281567131 | Down | 5.39E-07  | 1.01E-06   | AAEL008471-PA OS=Aedes aegypti GN=AAEL008471 PE=4 SV=1                                |
| CCG008644.1 | 1098 | 89  | 45 | 3.48297485 | 1.432716261 | -1.281567131 | Down | 5.39E-07  | 1.01E-06   | AAEL008024-PA OS=Aedes aegypti GN=AAEL008024 PE=4 SV=1                                |
| CCG008245.1 | 1098 | 98  | 45 | 3.83518578 | 1.432716261 | -1.420543544 | Down | 1.23E-08  | 2.46E-08   | AAEL009777-PA OS=Aedes aegypti GN=AAEL009777 PE=4 SV=1                                |
| CCG018379.1 | 3558 | 112 | 45 | 1.35261672 | 0.442136721 | -1.613188622 | Down | 2.16E-11  | 4.72E-11   | AAEL001513-PA OS=Aedes aegypti GN=AAEL001513 PE=4 SV=1                                |

|             |       |     |    |            |             |              |      |           |            |                                                                            |
|-------------|-------|-----|----|------------|-------------|--------------|------|-----------|------------|----------------------------------------------------------------------------|
| CCG001852.1 | 663   | 130 | 45 | 8.42543816 | 2.372733718 | -1.828201513 | Down | 3.09E-15  | 1.12E-14   | AAEL007955-PA (Fragment)<br>OS=Aedes aegypti GN=GSTE8<br>PE=3 SV=1         |
| CCG013892.1 | 1002  | 142 | 45 | 6.08952327 | 1.56998249  | -1.955580819 | Down | 5.96E-18  | 2.28E-17   | AAEL002116-PA OS=Aedes<br>aegypti GN=AAEL002116 PE=4<br>SV=1               |
| CCG000020.1 | 168   | 150 | 45 | 38.3658345 | 9.363824135 | -2.03465239  | Down | 8.09E-20  | 3.15E-19   | AAEL002549-PA OS=Aedes<br>aegypti GN=AAEL002549 PE=4<br>SV=1               |
| CCG003801.1 | 1201  | 169 | 45 | 6.04653218 | 1.309843842 | -2.206713136 | Down | 2.06E-24  | 8.34E-24   | AAEL002149-PA OS=Aedes<br>aegypti GN=AAEL002149 PE=3<br>SV=1               |
| CCG013634.1 | 1278  | 172 | 45 | 5.78309417 | 1.230925238 | -2.232098455 | Down | 3.72E-25  | 1.51E-24   | AAEL004923-PA OS=Aedes<br>aegypti GN=AAEL004923 PE=4<br>SV=1               |
| CCG011903.1 | 273   | 174 | 45 | 27.3873034 | 5.762353314 | -2.248777196 | Down | 1.18E-25  | 4.83E-25   | AAEL001392-PA OS=Aedes<br>aegypti GN=AAEL001392 PE=4<br>SV=1               |
| CCG002850.1 | 1335  | 178 | 45 | 5.72929795 | 1.17836888  | -2.281567131 | Down | 1.17E-26  | 4.84E-26   | AAEL003476-PA OS=Aedes<br>aegypti GN=AAEL003476 PE=4<br>SV=1               |
| CCG011680.1 | 1156  | 199 | 45 | 7.39703909 | 1.360832573 | -2.44245832  | Down | 4.87E-32  | 2.08E-31   | Uncharacterized protein<br>OS=Anopheles darlingi<br>GN=AND_16259 PE=3 SV=1 |
| CCG023957.1 | 1038  | 216 | 45 | 8.94167888 | 1.51553223  | -2.560721202 | Down | 1.59E-36  | 6.97E-36   | AAEL009640-PA OS=Aedes<br>aegypti GN=AAEL009640 PE=4<br>SV=1               |
| CCG016363.1 | 1107  | 301 | 45 | 11.6837309 | 1.421068161 | -3.039453377 | Down | 3.35E-60  | 1.62E-59   | AAEL004690-PA OS=Aedes<br>aegypti GN=AAEL004690 PE=4<br>SV=1               |
| CCG021895.1 | 13461 | 521 | 45 | 1.66311802 | 0.1168652   | -3.830973262 | Down | 1.05E-126 | 5.82E-126  | AAEL003155-PA OS=Aedes<br>aegypti GN=AAEL003155 PE=4<br>SV=1               |
| CCG004173.2 | 1764  | 0   | 46 | 0.001      | 0.911610392 | 9.832273561  | Up   | 1.41E-12  | 3.42E-12   | AAEL007932-PA OS=Aedes<br>aegypti GN=AAEL007932 PE=4<br>SV=1               |
| CCG004626.1 | 1344  | 1   | 46 | 0.03197153 | 1.19648864  | 5.22587516   | Up   | 0.000587  | 0.0009174  | AAEL008449-PA OS=Aedes<br>aegypti GN=AAEL008449 PE=4<br>SV=1               |
| CCG017399.1 | 415   | 2   | 46 | 0.20708306 | 3.874893329 | 4.22587516   | Up   | 9.36E-05  | 0.00015316 | -                                                                          |
| CCG022013.1 | 648   | 2   | 46 | 0.13262264 | 2.481606067 | 4.22587516   | Up   | 9.36E-05  | 0.00015317 | AAEL011896-PA OS=Aedes<br>aegypti GN=AAEL011896 PE=4<br>SV=1               |
| CCG004612.1 | 405   | 3   | 46 | 0.31829433 | 3.970569707 | 3.640912659  | Up   | 5.28E-05  | 8.83E-05   | AAEL006515-PA OS=Aedes<br>aegypti GN=AAEL006515 PE=4<br>SV=1               |

|             |      |    |    |            |             |              |      |          |            |                                                                             |
|-------------|------|----|----|------------|-------------|--------------|------|----------|------------|-----------------------------------------------------------------------------|
| CCG006731.1 | 480  | 3  | 46 | 0.26856084 | 3.350168191 | 3.640912659  | Up   | 5.28E-05 | 8.83E-05   | AAEL012593-PA (Fragment)<br>OS=Aedes aegypti<br>GN=AAEL012593 PE=4 SV=1     |
| CCG021786.1 | 945  | 3  | 46 | 0.13641186 | 1.701672732 | 3.640912659  | Up   | 5.28E-05 | 8.83E-05   | -                                                                           |
| CCG011297.1 | 1521 | 3  | 46 | 0.08475293 | 1.057252289 | 3.640912659  | Up   | 5.28E-05 | 8.83E-05   | AAEL010929-PA OS=Aedes<br>aegypti GN=AAEL010929 PE=3<br>SV=1                |
| CCG025937.1 | 693  | 3  | 46 | 0.18601617 | 2.320462816 | 3.640912659  | Up   | 5.28E-05 | 8.83E-05   | AAEL011307-PA OS=Aedes<br>aegypti GN=AAEL011307 PE=4<br>SV=1                |
| CCG004499.1 | 542  | 4  | 46 | 0.31711981 | 2.966938619 | 3.22587516   | Up   | 2.95E-05 | 5.02E-05   | -                                                                           |
| CCG016552.1 | 936  | 5  | 46 | 0.22953918 | 1.71803497  | 2.903947065  | Up   | 1.60E-05 | 2.77E-05   | AAEL013440-PA OS=Aedes<br>aegypti GN=AAEL013440 PE=4<br>SV=1                |
| CCG005924.2 | 210  | 5  | 46 | 1.02308892 | 7.657527293 | 2.903947065  | Up   | 1.60E-05 | 2.77E-05   | AAEL004060-PA OS=Aedes<br>aegypti GN=AAEL004060 PE=4<br>SV=1                |
| CCG020283.1 | 1251 | 6  | 46 | 0.20608985 | 1.285436236 | 2.640912659  | Up   | 8.69E-06 | 1.52E-05   | AGAP001085-PA (Fragment)<br>OS=Anopheles gambiae<br>GN=AGAP001085 PE=4 SV=1 |
| CCG003556.1 | 1355 | 6  | 46 | 0.19027189 | 1.186775448 | 2.640912659  | Up   | 8.69E-06 | 1.52E-05   | -                                                                           |
| CCG022215.1 | 764  | 7  | 46 | 0.39370176 | 2.104817711 | 2.418520238  | Up   | 5.42E-06 | 9.62E-06   | -                                                                           |
| CCG014635.1 | 294  | 7  | 46 | 1.02308892 | 5.469662352 | 2.418520238  | Up   | 5.42E-06 | 9.62E-06   | -                                                                           |
| CCG005635.1 | 687  | 8  | 46 | 0.50037537 | 2.340728867 | 2.22587516   | Up   | 5.70E-06 | 1.01E-05   | AAEL007040-PA OS=Aedes<br>aegypti GN=AAEL007040 PE=4<br>SV=1                |
| CCG024026.1 | 1468 | 9  | 46 | 0.26343843 | 1.095422842 | 2.055950158  | Up   | 1.12E-05 | 1.96E-05   | Pol-like protein OS=Aedes aegypti<br>PE=4 SV=1                              |
| CCG015973.1 | 1077 | 10 | 46 | 0.39897618 | 1.493111171 | 1.903947065  | Up   | 2.73E-05 | 4.66E-05   | AAEL007298-PA OS=Aedes<br>aegypti GN=AAEL007298 PE=4<br>SV=1                |
| CCG026661.1 | 857  | 10 | 46 | 0.50139714 | 1.876406921 | 1.903947065  | Up   | 2.73E-05 | 4.66E-05   | AAEL015565-PA OS=Aedes<br>aegypti GN=AAEL015565 PE=4<br>SV=1                |
| CCG028150.1 | 1395 | 10 | 46 | 0.30802677 | 1.152746044 | 1.903947065  | Up   | 2.73E-05 | 4.66E-05   | AAEL004640-PA OS=Aedes<br>aegypti GN=AAEL004640 PE=4<br>SV=1                |
| CCG003396.1 | 705  | 11 | 46 | 0.67044976 | 2.280965577 | 1.766443541  | Up   | 6.56E-05 | 0.00010891 | AAEL003906-PA OS=Aedes<br>aegypti GN=AAEL003906 PE=4<br>SV=1                |
| CCG011886.1 | 1678 | 11 | 46 | 0.28168479 | 0.958331783 | 1.766443541  | Up   | 6.56E-05 | 0.0001089  | AAEL008622-PA OS=Aedes<br>aegypti GN=AAEL008622 PE=4<br>SV=1                |
| CCG024727.1 | 540  | 92 | 46 | 7.3207696  | 2.977927281 | -1.297686796 | Down | 2.66E-07 | 5.02E-07   | AAEL010947-PA OS=Aedes<br>aegypti GN=AAEL010947 PE=4<br>SV=1                |

|             |      |     |    |            |             |              |      |           |           |                                                                            |
|-------------|------|-----|----|------------|-------------|--------------|------|-----------|-----------|----------------------------------------------------------------------------|
| CCG010367.1 | 1062 | 94  | 46 | 3.80334751 | 1.514200312 | -1.328713692 | Down | 1.17E-07  | 2.24E-07  | AAEL000558-PA OS=Aedes aegypti GN=AAEL000558 PE=4 SV=1                     |
| CCG013635.1 | 1236 | 104 | 46 | 3.61557638 | 1.301036191 | -1.474564558 | Down | 1.59E-09  | 3.26E-09  | AAEL004935-PA OS=Aedes aegypti GN=AAEL004935 PE=4 SV=1                     |
| CCG004844.1 | 900  | 119 | 46 | 5.6815538  | 1.786756368 | -1.668942603 | Down | 1.51E-12  | 3.64E-12  | Glutamate receptor OS=Culex quinquefasciatus GN=CpipJ_CPIJ006667 PE=4 SV=1 |
| CCG017514.1 | 371  | 125 | 46 | 14.4776734 | 4.334449411 | -1.739909125 | Down | 8.05E-14  | 2.58E-13  | -                                                                          |
| CCG028039.1 | 1600 | 132 | 46 | 3.54500311 | 1.005050457 | -1.818518959 | Down | 2.40E-15  | 8.70E-15  | AAEL012390-PA OS=Aedes aegypti GN=AAEL012390 PE=4 SV=1                     |
| CCG021355.1 | 1455 | 140 | 46 | 4.13454491 | 1.105210125 | -1.903407857 | Down | 3.88E-17  | 1.47E-16  | AAEL007748-PA OS=Aedes aegypti GN=SCRB10 PE=4 SV=2                         |
| CCG011562.1 | 2046 | 140 | 46 | 2.94025555 | 0.785963212 | -1.903407857 | Down | 3.88E-17  | 1.47E-16  | AAEL004761-PA OS=Aedes aegypti GN=AAEL004761 PE=4 SV=1                     |
| CCG017243.1 | 1824 | 145 | 46 | 3.41590544 | 0.881623208 | -1.95403393  | Down | 2.79E-18  | 1.07E-17  | AAEL001203-PA OS=Aedes aegypti GN=AAEL001203 PE=4 SV=1                     |
| CCG002599.1 | 825  | 212 | 46 | 11.0419197 | 1.949188765 | -2.502045295 | Down | 5.77E-35  | 2.50E-34  | Beta-galactosidase OS=Culex quinquefasciatus GN=CpipJ_CPIJ003336 PE=3 SV=1 |
| CCG001145.1 | 1995 | 405 | 46 | 8.72317921 | 0.806055505 | -3.435902938 | Down | 2.95E-90  | 1.54E-89  | AAEL000555-PA OS=Aedes aegypti GN=AAEL000555 PE=4 SV=1                     |
| CCG002524.1 | 582  | 603 | 46 | 44.520189  | 2.763025312 | -4.010139032 | Down | 1.27E-151 | 7.21E-151 | AAEL000419-PA OS=Aedes aegypti GN=AAEL000419 PE=4 SV=1                     |
| CCG021133.1 | 435  | 0   | 47 | 0.001      | 3.777101169 | 11.88306371  | Up   | 7.79E-13  | 1.95E-12  | AAEL000566-PA OS=Aedes aegypti GN=AAEL000566 PE=4 SV=1                     |
| CCG019402.1 | 1164 | 0   | 47 | 0.001      | 1.41154554  | 10.46305996  | Up   | 7.79E-13  | 1.95E-12  | Uncharacterized protein OS=Anopheles darlingi GN=AND_00916 PE=4 SV=1       |
| CCG027664.1 | 885  | 3   | 47 | 0.14566012 | 1.856541252 | 3.671939555  | Up   | 5.28E-05  | 8.83E-05  | AAEL010185-PA OS=Aedes aegypti GN=AAEL010185 PE=4 SV=1                     |
| CCG006013.1 | 564  | 4   | 47 | 0.30474989 | 2.913189731 | 3.256902055  | Up   | 2.95E-05  | 5.02E-05  | AAEL013900-PA (Fragment) OS=Aedes aegypti GN=AAEL013900 PE=4 SV=1          |



|             |      |     |    |            |             |              |      |           |            |                                                                                                 |
|-------------|------|-----|----|------------|-------------|--------------|------|-----------|------------|-------------------------------------------------------------------------------------------------|
| CCG010206.1 | 1173 | 8   | 47 | 0.29305872 | 1.400715267 | 2.256902055  | Up   | 4.44E-06  | 7.90E-06   | AAEL001724-PA (Fragment)<br>OS=Aedes aegypti<br>GN=GPRNNB3 PE=4 SV=2                            |
| CCG000128.1 | 1086 | 8   | 47 | 0.3165358  | 1.512927264 | 2.256902055  | Up   | 4.44E-06  | 7.91E-06   | Zinc finger protein 307 OS=Culex<br>quinquefasciatus<br>GN=CpipJ_CPIJ015272 PE=4<br>SV=1        |
| CCG002068.1 | 632  | 9   | 47 | 0.61191078 | 2.599745266 | 2.086977054  | Up   | 7.69E-06  | 1.36E-05   | -                                                                                               |
| CCG014793.1 | 666  | 9   | 47 | 0.58067209 | 2.467025538 | 2.086977054  | Up   | 7.69E-06  | 1.36E-05   | AAEL008347-PA OS=Aedes<br>aegypti GN=AAEL008347 PE=4<br>SV=1                                    |
| CCG026139.1 | 936  | 9   | 47 | 0.41317053 | 1.755383556 | 2.086977054  | Up   | 7.69E-06  | 1.36E-05   | AAEL001481-PA OS=Aedes<br>aegypti GN=AAEL001481 PE=4<br>SV=1                                    |
| CCG004468.1 | 3925 | 10  | 47 | 0.10947703 | 0.418608665 | 1.934973961  | Up   | 1.82E-05  | 3.14E-05   | Putative uncharacterized protein<br>OS=Tribolium castaneum<br>GN=TcasGA2_TC001426 PE=4<br>SV=1  |
| CCG025549.1 | 780  | 10  | 47 | 0.55089403 | 2.106460267 | 1.934973961  | Up   | 1.82E-05  | 3.14E-05   | Transcriptional activator HAPZ<br>OS=Culex quinquefasciatus<br>GN=CpipJ_CPIJ017497 PE=4<br>SV=1 |
| CCG004064.1 | 668  | 13  | 47 | 0.83623735 | 2.459639234 | 1.556462337  | Up   | 0.0002219 | 0.00035572 | AAEL002668-PA OS=Aedes<br>aegypti GN=AAEL002668 PE=4<br>SV=1                                    |
| CCG009375.1 | 758  | 14  | 47 | 0.79363626 | 2.167597636 | 1.449547133  | Up   | 0.0004562 | 0.00071869 | Uncharacterized protein<br>OS=Anopheles darlingi<br>GN=AND_10609 PE=4 SV=1                      |
| CCG015778.1 | 1083 | 79  | 47 | 3.13444971 | 1.517118198 | -1.046878693 | Down | 5.99E-05  | 9.96E-05   | -                                                                                               |
| CCG027522.1 | 528  | 79  | 47 | 6.42918378 | 3.111816304 | -1.046878693 | Down | 5.99E-05  | 9.96E-05   | Uncharacterized protein<br>OS=Anopheles darlingi<br>GN=AND_01498 PE=4 SV=1                      |
| CCG005653.1 | 423  | 90  | 47 | 9.14249673 | 3.884252975 | -1.234951041 | Down | 9.82E-07  | 1.81E-06   | AAEL012691-PA OS=Aedes<br>aegypti GN=AAEL012691 PE=3<br>SV=1                                    |
| CCG025059.1 | 623  | 105 | 47 | 7.2420901  | 2.637301779 | -1.457343462 | Down | 1.84E-09  | 3.77E-09   | -                                                                                               |
| CCG010869.1 | 3777 | 109 | 47 | 1.24005853 | 0.435011652 | -1.511282269 | Down | 3.09E-10  | 6.49E-10   | AAEL012104-PA (Fragment)<br>OS=Aedes aegypti<br>GN=AAEL012104 PE=4 SV=1                         |
| CCG002404.1 | 1484 | 124 | 47 | 3.590463   | 1.107169143 | -1.697294255 | Down | 2.68E-13  | 7.50E-13   | -                                                                                               |

|             |      |      |    |            |             |              |      |           |           |                                                                                                   |
|-------------|------|------|----|------------|-------------|--------------|------|-----------|-----------|---------------------------------------------------------------------------------------------------|
| CCG023887.1 | 3484 | 124  | 47 | 1.52934762 | 0.471595582 | -1.697294255 | Down | 2.68E-13  | 7.50E-13  | GK18646 OS=Drosophila willistoni<br>GN=GK18646 PE=4 SV=1                                          |
| CCG011273.1 | 1158 | 130  | 47 | 4.82389076 | 1.418859247 | -1.765465758 | Down | 1.39E-14  | 4.96E-14  | -                                                                                                 |
| CCG022484.1 | 540  | 145  | 47 | 11.5381695 | 3.04266483  | -1.923007035 | Down | 6.36E-18  | 2.43E-17  | AAEL008241-PA OS=Aedes<br>aegypti GN=AAEL008241 PE=4<br>SV=1                                      |
| CCG008752.1 | 4507 | 154  | 47 | 1.46823588 | 0.364552698 | -2.009884485 | Down | 5.26E-20  | 2.05E-19  | Putative uncharacterized protein<br>(Fragment) OS=Solenopsis invicta<br>GN=SINV_11683 PE=4 SV=1   |
| CCG001978.1 | 504  | 161  | 47 | 13.726443  | 3.259998032 | -2.074014823 | Down | 1.16E-21  | 4.61E-21  | AAEL007682-PA OS=Aedes<br>aegypti GN=AAEL007682 PE=4<br>SV=1                                      |
| CCG011216.1 | 1368 | 168  | 47 | 5.27698495 | 1.201051907 | -2.135415367 | Down | 2.41E-23  | 9.66E-23  | AAEL009927-PA OS=Aedes<br>aegypti GN=AAEL009927 PE=4<br>SV=1                                      |
| CCG015519.1 | 1128 | 168  | 47 | 6.39974771 | 1.456594866 | -2.135415367 | Down | 2.41E-23  | 9.65E-23  | AAEL013185-PA OS=Aedes<br>aegypti GN=AAEL013185 PE=4<br>SV=1                                      |
| CCG000672.1 | 1942 | 306  | 47 | 6.77072028 | 0.846055102 | -3.000485787 | Down | 2.14E-60  | 1.03E-59  | -                                                                                                 |
| CCG027024.1 | 2418 | 422  | 47 | 7.49926717 | 0.679503312 | -3.464197133 | Down | 1.17E-94  | 6.14E-94  | AAEL013322-PA OS=Aedes<br>aegypti GN=AAEL013322 PE=4<br>SV=1                                      |
| CCG002387.1 | 3426 | 575  | 47 | 7.21179142 | 0.479579395 | -3.91051609  | Down | 6.37E-142 | 3.59E-141 | Putative uncharacterized protein<br>OS=Culex quinquefasciatus<br>GN=CpipJ_CPIJ011995 PE=4<br>SV=1 |
| CCG015925.1 | 1581 | 617  | 47 | 16.7693398 | 1.039240359 | -4.012224624 | Down | 3.65E-155 | 2.08E-154 | AAEL011459-PA OS=Aedes<br>aegypti GN=AAEL011459 PE=4<br>SV=1                                      |
| CCG027112.1 | 1761 | 652  | 47 | 15.9092941 | 0.933014769 | -4.091826099 | Down | 2.88E-166 | 1.67E-165 | AAEL008943-PA OS=Aedes<br>aegypti GN=AAEL008943 PE=4<br>SV=1                                      |
| CCG014071.1 | 789  | 701  | 47 | 38.177166  | 2.082432203 | -4.196368579 | Down | 6.69E-182 | 3.93E-181 | Alcohol dehydrogenase z<br>OS=Culex quinquefasciatus<br>GN=CpipJ_CPIJ018908 PE=3<br>SV=1          |
| CCG011625.1 | 291  | 832  | 47 | 122.855049 | 5.646182159 | -4.443537663 | Down | 4.00E-224 | 2.42E-223 | -                                                                                                 |
| CCG020013.1 | 4959 | 1085 | 47 | 9.40152491 | 0.331324664 | -4.826577272 | Down | 6.00E-307 | 3.80E-306 | Cadherin OS=Culex<br>quinquefasciatus<br>GN=CpipJ_CPIJ008474 PE=4<br>SV=1                         |
| CCG011849.1 | 935  | 1249 | 47 | 57.4002123 | 1.757260971 | -5.029655706 | Down | 0         | 0         | AAEL002512-PA OS=Aedes<br>aegypti GN=AAEL002512 PE=4<br>SV=1                                      |
| CCG023728.1 | 1251 | 5720 | 47 | 196.472328 | 1.313380502 | -7.224897376 | Down | 0         | 0         | AAEL013367-PA OS=Aedes<br>aegypti GN=AAEL013367 PE=4<br>SV=1                                      |

|             |      |    |    |            |             |             |    |          |            |                                                                                          |
|-------------|------|----|----|------------|-------------|-------------|----|----------|------------|------------------------------------------------------------------------------------------|
| CCG010580.1 | 456  | 0  | 48 | 0.001      | 3.679818608 | 11.84541894 | Up | 4.29E-13 | 1.13E-12   | AAEL013835-PA OS=Aedes aegypti GN=AAEL013835 PE=4 SV=1                                   |
| CCG022113.1 | 1646 | 0  | 48 | 0.001      | 1.01943942  | 9.99356033  | Up | 4.29E-13 | 1.13E-12   | Uncharacterized protein OS=Anopheles darlingi GN=AND_11211 PE=4 SV=1                     |
| CCG018724.1 | 1524 | 1  | 48 | 0.02819536 | 1.101048087 | 5.287275705 | Up | 0.000587 | 0.00091649 | AAEL004975-PA OS=Aedes aegypti GN=AAEL004975 PE=4 SV=1                                   |
| CCG005470.1 | 319  | 2  | 48 | 0.26940272 | 5.260179577 | 4.287275705 | Up | 9.36E-05 | 0.00015319 | -                                                                                        |
| CCG026325.1 | 1680 | 2  | 48 | 0.05115445 | 0.998807908 | 4.287275705 | Up | 9.36E-05 | 0.0001532  | AAEL014180-PA OS=Aedes aegypti GN=AAEL014180 PE=4 SV=1                                   |
| CCG005657.1 | 403  | 2  | 48 | 0.2132493  | 4.163764975 | 4.287275705 | Up | 9.36E-05 | 0.00015318 | -                                                                                        |
| CCG016187.1 | 783  | 3  | 48 | 0.164635   | 2.143036124 | 3.702313204 | Up | 5.28E-05 | 8.83E-05   | AAEL011537-PA OS=Aedes aegypti GN=AAEL011537 PE=4 SV=1                                   |
| CCG022585.1 | 967  | 3  | 48 | 0.13330838 | 1.735260895 | 3.702313204 | Up | 5.28E-05 | 8.83E-05   | -                                                                                        |
| CCG012222.1 | 2101 | 4  | 48 | 0.08180816 | 0.798666009 | 3.287275705 | Up | 2.95E-05 | 5.02E-05   | AAEL002840-PA OS=Aedes aegypti GN=AAEL002840 PE=4 SV=1                                   |
| CCG004439.1 | 586  | 5  | 48 | 0.36663596 | 2.863476596 | 2.96534761  | Up | 1.60E-05 | 2.76E-05   | Uncharacterized protein OS=Anopheles darlingi GN=AND_00155 PE=4 SV=1                     |
| CCG005759.1 | 2193 | 6  | 48 | 0.11756425 | 0.765160641 | 2.702313204 | Up | 8.49E-06 | 1.49E-05   | AAEL007619-PA OS=Aedes aegypti GN=TOLL5A PE=4 SV=1                                       |
| CCG020383.1 | 1380 | 7  | 48 | 0.21796242 | 1.215940062 | 2.479920782 | Up | 4.75E-06 | 8.45E-06   | Putative uncharacterized protein OS=Culex quinquefasciatus GN=CpipJ_CPIJ013304 PE=4 SV=1 |
| CCG027073.1 | 1055 | 10 | 48 | 0.40729606 | 1.590518754 | 1.96534761  | Up | 1.22E-05 | 2.13E-05   | Putative uncharacterized protein OS=Culex quinquefasciatus GN=CpipJ_CPIJ002513 PE=4 SV=1 |
| CCG024589.1 | 1433 | 12 | 48 | 0.3598303  | 1.170968098 | 1.702313204 | Up | 6.95E-05 | 0.00011535 | AAEL014705-PA OS=Aedes aegypti GN=AAEL014705 PE=4 SV=1                                   |
| CCG016852.1 | 1686 | 12 | 48 | 0.30583441 | 0.995253431 | 1.702313204 | Up | 6.95E-05 | 0.00011534 | Alkaline phosphatase OS=Aedes aegypti GN=AAEL003309 PE=3 SV=1                            |
| CCG024319.1 | 2364 | 12 | 48 | 0.21812048 | 0.709812726 | 1.702313204 | Up | 6.95E-05 | 0.00011533 | STIP OS=Aedes aegypti PE=2 SV=1                                                          |

|             |      |      |    |            |             |              |      |           |            |                                                                      |
|-------------|------|------|----|------------|-------------|--------------|------|-----------|------------|----------------------------------------------------------------------|
| CCG016267.1 | 1407 | 14   | 48 | 0.42755955 | 1.192606457 | 1.479920782  | Up   | 0.0003204 | 0.00050881 | AAEL007131-PA OS=Aedes aegypti GN=AAEL007131 PE=4 SV=1               |
| CCG015212.1 | 1851 | 81   | 48 | 1.88036116 | 0.90653554  | -1.052574298 | Down | 4.46E-05  | 7.51E-05   | AAEL003111-PA OS=Aedes aegypti GN=AAEL003111 PE=4 SV=1               |
| CCG026921.1 | 1431 | 86   | 48 | 2.58238796 | 1.172604672 | -1.13898905  | Down | 7.28E-06  | 1.29E-05   | AAEL011644-PA OS=Aedes aegypti GN=GPR5HT5B PE=3 SV=1                 |
| CCG013182.1 | 1520 | 87   | 48 | 2.45945192 | 1.103945582 | -1.155667791 | Down | 5.00E-06  | 8.90E-06   | AAEL003632-PA OS=Aedes aegypti GN=CLIPB39 PE=3 SV=1                  |
| CCG002694.1 | 711  | 89   | 48 | 5.37877128 | 2.36005244  | -1.188457726 | Down | 2.34E-06  | 4.22E-06   | Protein Wnt OS=Aedes aegypti GN=AAEL008277 PE=3 SV=1                 |
| CCG010223.1 | 864  | 106  | 48 | 5.27174985 | 1.942126487 | -1.44064475  | Down | 2.13E-09  | 4.36E-09   | AAEL012439-PA OS=Aedes aegypti GN=AAEL012439 PE=4 SV=1               |
| CCG005368.1 | 2058 | 110  | 48 | 2.29673023 | 0.815353394 | -1.494084009 | Down | 3.63E-10  | 7.61E-10   | AAEL009939-PA OS=Aedes aegypti GN=AAEL009939 PE=4 SV=1               |
| CCG024731.1 | 945  | 112  | 48 | 5.09270929 | 1.775658503 | -1.520079218 | Down | 1.47E-10  | 3.13E-10   | AAEL003294-PA OS=Aedes aegypti GN=AAEL003294 PE=4 SV=1               |
| CCG012702.1 | 891  | 117  | 48 | 5.6424904  | 1.88327417  | -1.583089015 | Down | 1.48E-11  | 3.27E-11   | AAEL007953-PA OS=Aedes aegypti GN=AAEL007953 PE=4 SV=1               |
| CCG010498.2 | 1262 | 154  | 48 | 5.24353338 | 1.329633348 | -1.979510836 | Down | 1.24E-19  | 4.80E-19   | -                                                                    |
| CCG003075.1 | 2157 | 189  | 48 | 3.76508106 | 0.777931055 | -2.27496672  | Down | 4.11E-28  | 1.71E-27   | AAEL009045-PA OS=Aedes aegypti GN=AAEL009045 PE=4 SV=1               |
| CCG006479.1 | 285  | 221  | 48 | 33.3203907 | 5.887709772 | -2.500626855 | Down | 2.33E-36  | 1.02E-35   | AGAP004476-PA OS=Anopheles gambiae GN=AgaP_AGAP004476 PE=4 SV=4      |
| CCG020420.1 | 1395 | 290  | 48 | 8.93277637 | 1.202865437 | -2.892633385 | Down | 3.03E-55  | 1.44E-54   | AAEL004082-PA OS=Aedes aegypti GN=AAEL004082 PE=3 SV=1               |
| CCG006871.1 | 1260 | 643  | 48 | 21.9282058 | 1.331743877 | -4.041399223 | Down | 1.66E-162 | 9.58E-162  | AAEL014802-PA OS=Aedes aegypti GN=AAEL014802 PE=4 SV=1               |
| CCG009922.1 | 3975 | 892  | 48 | 9.64251655 | 0.422137682 | -4.513624195 | Down | 1.34E-242 | 8.23E-242  | AAEL003262-PA OS=Aedes aegypti GN=AAEL003262 PE=4 SV=1               |
| CCG007672.1 | 549  | 2412 | 48 | 188.785064 | 3.056461357 | -5.948738487 | Down | 0         | 0          | Probable GGY family antimicrobial peptide OS=Aedes aegypti PE=4 SV=1 |
| CCG012229.1 | 489  | 3    | 49 | 0.263618   | 3.502976609 | 3.732060547  | Up   | 5.28E-05  | 8.83E-05   | AAEL009296-PA OS=Aedes aegypti GN=AAEL009296 PE=4 SV=1               |

|             |      |    |    |            |             |              |      |           |            |                                                                                          |
|-------------|------|----|----|------------|-------------|--------------|------|-----------|------------|------------------------------------------------------------------------------------------|
| CCG012174.1 | 798  | 4  | 49 | 0.21538714 | 2.146560854 | 3.317023048  | Up   | 2.95E-05  | 5.02E-05   | AAEL004627-PA OS=Aedes aegypti GN=AAEL004627 PE=4 SV=1                                   |
| CCG012372.1 | 1656 | 5  | 49 | 0.12973954 | 1.034393455 | 2.995094953  | Up   | 1.60E-05  | 2.76E-05   | Putative uncharacterized protein OS=Culex quinquefasciatus GN=CpipJ_CPIJ006639 PE=4 SV=1 |
| CCG005139.1 | 687  | 6  | 49 | 0.37528152 | 2.493385097 | 2.732060547  | Up   | 8.45E-06  | 1.48E-05   | AAEL014136-PA OS=Aedes aegypti GN=AAEL014136 PE=4 SV=1                                   |
| CCG004937.1 | 1608 | 8  | 49 | 0.21377977 | 1.065270872 | 2.317023048  | Up   | 3.10E-06  | 5.57E-06   | Gag-like protein OS=Aedes aegypti PE=4 SV=1                                              |
| CCG028608.1 | 1135 | 8  | 49 | 0.30287038 | 1.509211949 | 2.317023048  | Up   | 3.10E-06  | 5.57E-06   | GK18652 OS=Drosophila willistoni GN=GK18652 PE=4 SV=1                                    |
| CCG022792.1 | 1961 | 10 | 49 | 0.21912154 | 0.87351125  | 1.995094953  | Up   | 8.23E-06  | 1.45E-05   | Putative uncharacterized protein OS=Tribolium castaneum GN=TcasGA2_TC010720 PE=4 SV=1    |
| CCG010842.1 | 3012 | 14 | 49 | 0.19972652 | 0.568710346 | 1.509668126  | Up   | 0.0002241 | 0.00035923 | Putative uncharacterized protein OS=Tribolium castaneum GN=TcasGA2_TC004811 PE=4 SV=1    |
| CCG007551.1 | 801  | 14 | 49 | 0.75103157 | 2.138521301 | 1.509668126  | Up   | 0.0002241 | 0.00035925 | AAEL010576-PA OS=Aedes aegypti GN=AAEL010576 PE=4 SV=1                                   |
| CCG026321.1 | 783  | 15 | 49 | 0.82317499 | 2.18768271  | 1.410132452  | Up   | 0.0004506 | 0.00071015 | AAEL002760-PA OS=Aedes aegypti GN=AAEL002760 PE=4 SV=1                                   |
| CCG008496.1 | 1977 | 80 | 49 | 1.73878542 | 0.866441862 | -1.004905047 | Down | 9.44E-05  | 0.00015421 | Putative uncharacterized protein OS=Tribolium castaneum GN=TcasGA2_TC002325 PE=4 SV=1    |
| CCG005090.1 | 552  | 85 | 49 | 6.61671638 | 3.103180366 | -1.092367888 | Down | 1.63E-05  | 2.81E-05   | AAEL006454-PA OS=Aedes aegypti GN=AAEL006454 PE=4 SV=1                                   |
| CCG022227.1 | 510  | 89 | 49 | 7.49863996 | 3.358736396 | -1.158710383 | Down | 3.71E-06  | 6.66E-06   | AAEL012245-PA OS=Aedes aegypti GN=AAEL012245 PE=4 SV=1                                   |
| CCG004469.1 | 2415 | 95 | 49 | 1.69032082 | 0.709298369 | -1.25283256  | Down | 3.63E-07  | 6.81E-07   | Putative uncharacterized protein OS=Tribolium castaneum GN=TcasGA2_TC001808 PE=4 SV=1    |

|             |      |       |    |            |             |              |      |           |           |                                                                                          |
|-------------|------|-------|----|------------|-------------|--------------|------|-----------|-----------|------------------------------------------------------------------------------------------|
| CCG025598.1 | 1120 | 99    | 49 | 3.79821761 | 1.529424609 | -1.312333572 | Down | 7.22E-08  | 1.39E-07  | -                                                                                        |
| CCG016453.3 | 1547 | 112   | 49 | 3.11093101 | 1.107275735 | -1.490331874 | Down | 2.71E-10  | 5.71E-10  | AGAP005610-PA OS=Anopheles gambiae GN=AGAP005610 PE=4 SV=4                               |
| CCG019029.1 | 561  | 125   | 49 | 9.57436154 | 3.053396723 | -1.648761237 | Down | 6.60E-13  | 1.68E-12  | Putative uncharacterized protein OS=Culex quinquefasciatus GN=CpipJ_CPIJ009310 PE=4 SV=1 |
| CCG027369.1 | 1788 | 132   | 49 | 3.17226229 | 0.958028838 | -1.727371071 | Down | 2.22E-14  | 7.75E-14  | AAEL006156-PA OS=Aedes aegypti GN=AAEL006156 PE=4 SV=1                                   |
| CCG006042.2 | 1650 | 192   | 49 | 5.00011457 | 1.038154886 | -2.267939453 | Down | 1.98E-28  | 8.25E-28  | AAEL007088-PA OS=Aedes aegypti GN=AAEL007088 PE=4 SV=1                                   |
| CCG001355.1 | 1683 | 326   | 49 | 8.32331164 | 1.017798908 | -3.031705106 | Down | 6.69E-65  | 3.27E-64  | AAEL010653-PA OS=Aedes aegypti GN=AAEL010653 PE=4 SV=1                                   |
| CCG028321.1 | 1293 | 674   | 49 | 22.3987634 | 1.324791618 | -4.079581733 | Down | 1.92E-171 | 1.12E-170 | AAEL000044-PA OS=Aedes aegypti GN=CYP325Q1 PE=3 SV=1                                     |
| CCG027318.1 | 397  | 684   | 49 | 74.0334974 | 4.314749526 | -4.100829467 | Down | 1.27E-174 | 7.40E-174 | AAEL002781-PA OS=Aedes aegypti GN=AAEL002781 PE=3 SV=1                                   |
| CCG006125.1 | 681  | 3145  | 49 | 198.443194 | 2.515353248 | -6.301821254 | Down | 0         | 0         | Putative uncharacterized protein OS=Culex quinquefasciatus GN=CpipJ_CPIJ006517 PE=4 SV=1 |
| CCG018685.1 | 844  | 4576  | 49 | 232.973348 | 2.029568201 | -6.842848289 | Down | 0         | 0         | AAEL002889-PA OS=Aedes aegypti GN=AAEL002889 PE=4 SV=1                                   |
| CCG028308.1 | 1041 | 14690 | 49 | 606.364459 | 1.645490453 | -8.525523728 | Down | 0         | 0         | AAEL014231-PA (Fragment) OS=Aedes aegypti GN=AAEL014231 PE=4 SV=1                        |
| CCG021472.1 | 804  | 0     | 50 | 0.001      | 2.174022187 | 11.08615095  | Up   | 1.30E-13  | 3.98E-13  | Predicted protein OS=Culex quinquefasciatus GN=CpipJ_CPIJ015175 PE=4 SV=1                |
| CCG015992.1 | 819  | 0     | 50 | 0.001      | 2.134204931 | 11.059483    | Up   | 1.30E-13  | 3.98E-13  | AAEL011889-PA OS=Aedes aegypti GN=AAEL011889 PE=3 SV=1                                   |
| CCG011288.1 | 1452 | 0     | 50 | 0.001      | 1.20379741  | 10.2333769   | Up   | 1.30E-13  | 3.98E-13  | Putative uncharacterized protein OS=Culex quinquefasciatus GN=CpipJ_CPIJ004879 PE=4 SV=1 |

|             |      |    |    |            |             |             |    |          |            |                                                                                                            |
|-------------|------|----|----|------------|-------------|-------------|----|----------|------------|------------------------------------------------------------------------------------------------------------|
| CCG020531.1 | 582  | 1  | 50 | 0.07383116 | 3.003288382 | 5.346169394 | Up | 0.000587 | 0.00091643 | AGAP004106-PA OS=Anopheles gambiae GN=AgaP_AGAP004106 PE=4 SV=5                                            |
| CCG018339.1 | 945  | 1  | 50 | 0.04547062 | 1.849644274 | 5.346169394 | Up | 0.000587 | 0.00091547 | Putative uncharacterized protein OS=Tribolium castaneum GN=TcasGA2_TC004194 PE=4 SV=1                      |
| CCG027277.1 | 576  | 1  | 50 | 0.07460023 | 3.034572636 | 5.346169394 | Up | 0.000587 | 0.00091837 | AAEL004355-PA OS=Aedes aegypti GN=AAEL004355 PE=4 SV=1                                                     |
| CCG001719.1 | 687  | 2  | 50 | 0.12509384 | 2.544270507 | 4.346169394 | Up | 9.36E-05 | 0.00015328 | AAEL008482-PA OS=Aedes aegypti GN=AAEL008482 PE=4 SV=1                                                     |
| CCG011508.1 | 878  | 3  | 50 | 0.14682142 | 1.990790249 | 3.761206893 | Up | 5.28E-05 | 8.83E-05   | Uncharacterized protein (Fragment) OS=Xenopus tropicalis GN=LOC100489570 PE=4 SV=1                         |
| CCG020555.1 | 414  | 3  | 50 | 0.31137489 | 4.222014103 | 3.761206893 | Up | 5.28E-05 | 8.83E-05   | -                                                                                                          |
| CCG025618.1 | 1380 | 4  | 50 | 0.12454996 | 1.266604231 | 3.346169394 | Up | 2.95E-05 | 5.02E-05   | AAEL004194-PA OS=Aedes aegypti GN=AAEL004194 PE=4 SV=1                                                     |
| CCG009930.1 | 498  | 4  | 50 | 0.34513843 | 3.509867146 | 3.346169394 | Up | 2.95E-05 | 5.02E-05   | Activated protein kinase c receptor OS=Aedes triseriatus PE=2 SV=1                                         |
| CCG018405.1 | 937  | 6  | 50 | 0.27515305 | 1.865436327 | 2.761206893 | Up | 8.42E-06 | 1.48E-05   | AAEL014558-PA OS=Aedes aegypti GN=AAEL014558 PE=4 SV=1                                                     |
| CCG019785.1 | 1629 | 6  | 50 | 0.1582679  | 1.072998059 | 2.761206893 | Up | 8.42E-06 | 1.48E-05   | AAEL012971-PA OS=Aedes aegypti GN=AAEL012971 PE=4 SV=1                                                     |
| CCG027935.1 | 821  | 7  | 50 | 0.36636802 | 2.129005894 | 2.538814472 | Up | 4.48E-06 | 7.98E-06   | Retrovirus-related Pol polyprotein from transposon TNT 1-94 OS=Trichinella spiralis GN=Tsp_01017 PE=4 SV=1 |
| CCG005522.1 | 663  | 8  | 50 | 0.5184885  | 2.636370797 | 2.346169394 | Up | 2.77E-06 | 4.98E-06   | AAEL011476-PA OS=Aedes aegypti GN=AAEL011476 PE=2 SV=1                                                     |
| CCG002000.1 | 957  | 8  | 50 | 0.35920363 | 1.826451242 | 2.346169394 | Up | 2.77E-06 | 4.98E-06   | -                                                                                                          |
| CCG022513.2 | 5457 | 10 | 50 | 0.07874241 | 0.320306732 | 2.024241299 | Up | 5.58E-06 | 9.90E-06   | Putative uncharacterized protein OS=Tribolium castaneum GN=TcasGA2_TC010686 PE=4 SV=1                      |
| CCG000826.1 | 1540 | 11 | 50 | 0.30692668 | 1.135008986 | 1.886737775 | Up | 1.34E-05 | 2.33E-05   | -                                                                                                          |

|             |      |     |    |            |             |              |      |           |            |                                                                                          |
|-------------|------|-----|----|------------|-------------|--------------|------|-----------|------------|------------------------------------------------------------------------------------------|
| CCG025871.1 | 1194 | 11  | 50 | 0.39586858 | 1.463914438 | 1.886737775  | Up   | 1.34E-05  | 2.33E-05   | AAEL006846-PA OS=Aedes aegypti GN=AAEL006846 PE=4 SV=1                                   |
| CCG022740.1 | 474  | 12  | 50 | 1.08784138 | 3.687581938 | 1.761206893  | Up   | 3.20E-05  | 5.42E-05   | Putative uncharacterized protein OS=Culex quinquefasciatus GN=CpipJ_CPIJ002557 PE=4 SV=1 |
| CCG023414.1 | 359  | 14  | 50 | 1.67569996 | 4.868840776 | 1.538814472  | Up   | 0.0001562 | 0.00025221 | -                                                                                        |
| CCG003347.1 | 1821 | 14  | 50 | 0.33035491 | 0.959864821 | 1.538814472  | Up   | 0.0001562 | 0.00025219 | AAEL005578-PA OS=Aedes aegypti GN=AAEL005578 PE=4 SV=1                                   |
| CCG013381.1 | 1431 | 15  | 50 | 0.45041651 | 1.2214632   | 1.439278798  | Up   | 0.0003185 | 0.00050586 | Putative uncharacterized protein OS=Culex quinquefasciatus GN=CpipJ_CPIJ000648 PE=4 SV=1 |
| CCG006911.1 | 1155 | 15  | 50 | 0.5580485  | 1.513345315 | 1.439278798  | Up   | 0.0003185 | 0.00050589 | AAEL005748-PA OS=Aedes aegypti GN=AAEL005748 PE=4 SV=1                                   |
| CCG011999.1 | 1953 | 88  | 50 | 1.93616828 | 0.894989165 | -1.113262225 | Down | 8.41E-06  | 1.48E-05   | AAEL014371-PA OS=Aedes aegypti GN=AAEL014371 PE=3 SV=1                                   |
| CCG017895.1 | 578  | 93  | 50 | 6.91381543 | 3.024072385 | -1.192989418 | Down | 1.29E-06  | 2.36E-06   | -                                                                                        |
| CCG006615.1 | 1728 | 95  | 50 | 2.36234073 | 1.011524212 | -1.223686215 | Down | 5.93E-07  | 1.10E-06   | AAEL011885-PA OS=Aedes aegypti GN=AAEL011885 PE=4 SV=1                                   |
| CCG022811.1 | 364  | 103 | 50 | 12.1590183 | 4.801961095 | -1.340331134 | Down | 2.34E-08  | 4.61E-08   | -                                                                                        |
| CCG012573.1 | 1437 | 125 | 50 | 3.73779877 | 1.216363144 | -1.619614891 | Down | 1.29E-12  | 3.15E-12   | AAEL005409-PA OS=Aedes aegypti GN=AAEL005409 PE=4 SV=1                                   |
| CCG016153.1 | 3696 | 127 | 50 | 1.47650333 | 0.472920411 | -1.642515293 | Down | 5.01E-13  | 1.30E-12   | AAEL011586-PA OS=Aedes aegypti GN=AAEL011586 PE=4 SV=1                                   |
| CCG025709.1 | 1305 | 128 | 50 | 4.21465596 | 1.339397577 | -1.653830606 | Down | 3.11E-13  | 8.55E-13   | AAEL006926-PA OS=Aedes aegypti GN=AAEL006926 PE=4 SV=1                                   |
| CCG000004.1 | 1173 | 133 | 50 | 4.8721012  | 1.490122625 | -1.709113042 | Down | 2.77E-14  | 9.64E-14   | AAEL001262-PA OS=Aedes aegypti GN=AAEL001262 PE=4 SV=1                                   |
| CCG018224.1 | 3786 | 202 | 50 | 2.29262715 | 0.461678246 | -2.312042089 | Down | 1.64E-30  | 6.94E-30   | AAEL001675-PA OS=Aedes aegypti GN=CLIPA10 PE=3 SV=2                                      |
| CCG004981.1 | 2151 | 482 | 50 | 9.62873644 | 0.812605225 | -3.566719943 | Down | 1.21E-110 | 6.49E-110  | AAEL005386-PA OS=Aedes aegypti GN=AAEL005386 PE=4 SV=1                                   |
| CCG016008.1 | 711  | 504 | 50 | 30.4595587 | 2.458387959 | -3.63111053  | Down | 2.20E-117 | 1.20E-116  | AAEL010178-PA OS=Aedes aegypti GN=AAEL010178 PE=4 SV=1                                   |



|             |      |     |    |            |             |              |      |           |            |                                                                                                   |
|-------------|------|-----|----|------------|-------------|--------------|------|-----------|------------|---------------------------------------------------------------------------------------------------|
| CCG003707.1 | 4911 | 524 | 50 | 4.58483831 | 0.35591811  | -3.687253608 | Down | 1.52E-123 | 8.36E-123  | AAEL000307-PA (Fragment)<br>OS=Aedes aegypti<br>GN=AAEL000307 PE=4 SV=1                           |
| CCG012503.1 | 372  | 644 | 50 | 74.3884653 | 4.698693115 | -3.984747485 | Down | 4.81E-161 | 2.77E-160  | AAEL002725-PA OS=Aedes<br>aegypti GN=AAEL002725 PE=4<br>SV=1                                      |
| CCG003288.1 | 501  | 0   | 51 | 0.001      | 3.558626977 | 11.797105    | Up   | 7.17E-14  | 2.33E-13   | AAEL009160-PA OS=Aedes<br>aegypti GN=AAEL009160 PE=4<br>SV=1                                      |
| CCG023142.2 | 1705 | 0   | 51 | 0.001      | 1.045672795 | 10.03021577  | Up   | 7.17E-14  | 2.33E-13   | Uncharacterized protein<br>OS=Anopheles darlingi<br>GN=AND_11211 PE=4 SV=1                        |
| CCG000458.2 | 1500 | 4   | 51 | 0.11458596 | 1.18858141  | 3.374738546  | Up   | 2.95E-05  | 5.02E-05   | AAEL005074-PA OS=Aedes<br>aegypti GN=AAEL005074 PE=4<br>SV=1                                      |
| CCG026714.1 | 1515 | 4   | 51 | 0.11345144 | 1.176813277 | 3.374738546  | Up   | 2.95E-05  | 5.02E-05   | AAEL003984-PA OS=Aedes<br>aegypti GN=AAEL003984 PE=4<br>SV=1                                      |
| CCG022532.1 | 809  | 6   | 51 | 0.31868777 | 2.203797423 | 2.789776045  | Up   | 8.40E-06  | 1.48E-05   | -                                                                                                 |
| CCG017825.1 | 1377 | 9   | 51 | 0.28084794 | 1.294750992 | 2.204813544  | Up   | 2.25E-06  | 4.06E-06   | Putative uncharacterized protein<br>OS=Culex quinquefasciatus<br>GN=CpipJ_CPIJ016207 PE=4<br>SV=1 |
| CCG000732.1 | 909  | 9   | 51 | 0.42544292 | 1.961355462 | 2.204813544  | Up   | 2.25E-06  | 4.06E-06   | AAEL013123-PA OS=Aedes<br>aegypti GN=AAEL013123 PE=4<br>SV=1                                      |
| CCG021988.1 | 1261 | 14  | 51 | 0.47706287 | 1.413855762 | 1.567383624  | Up   | 0.0001084 | 0.00017659 | -                                                                                                 |
| CCG021174.1 | 1146 | 86  | 51 | 3.22460487 | 1.55573483  | -1.051526209 | Down | 2.63E-05  | 4.51E-05   | Zinc finger protein OS=Culex<br>quinquefasciatus<br>GN=CpipJ_CPIJ012811 PE=4<br>SV=1              |
| CCG008974.1 | 658  | 92  | 51 | 6.00792642 | 2.70953209  | -1.14882341  | Down | 2.98E-06  | 5.36E-06   | Putative uncharacterized protein<br>OS=Culex quinquefasciatus<br>GN=CpipJ_CPIJ005440 PE=4<br>SV=1 |
| CCG013968.1 | 1085 | 93  | 51 | 3.68312011 | 1.643200106 | -1.164420265 | Down | 2.05E-06  | 3.72E-06   | -                                                                                                 |
| CCG005646.1 | 1737 | 94  | 51 | 2.32536273 | 1.026408817 | -1.179850306 | Down | 1.40E-06  | 2.56E-06   | Putative uncharacterized protein<br>OS=Culex quinquefasciatus<br>GN=CpipJ_CPIJ015620 PE=4<br>SV=1 |
| CCG018118.1 | 456  | 95  | 51 | 8.95202804 | 3.909807271 | -1.195117063 | Down | 9.56E-07  | 1.76E-06   | AAEL003270-PA OS=Aedes<br>aegypti GN=AAEL003270 PE=4<br>SV=1                                      |
| CCG011979.1 | 2980 | 103 | 51 | 1.48519553 | 0.598279233 | -1.311761981 | Down | 3.97E-08  | 7.75E-08   | -                                                                                                 |

|             |      |     |    |            |             |              |      |           |           |                                                                   |
|-------------|------|-----|----|------------|-------------|--------------|------|-----------|-----------|-------------------------------------------------------------------|
| CCG025821.1 | 1020 | 111 | 51 | 4.67611818 | 1.747913839 | -1.419677321 | Down | 1.36E-09  | 2.80E-09  | AAEL010082-PA OS=Aedes aegypti GN=AAEL010082 PE=4 SV=1            |
| CCG022135.1 | 2808 | 112 | 51 | 1.71389255 | 0.634925967 | -1.432616376 | Down | 8.83E-10  | 1.82E-09  | AAEL012804-PA (Fragment) OS=Aedes aegypti GN=AAEL012804 PE=4 SV=1 |
| CCG012997.1 | 573  | 119 | 51 | 8.92390649 | 3.11146966  | -1.520079218 | Down | 3.94E-11  | 8.54E-11  | AAEL013434-PA OS=Aedes aegypti GN=AAEL013434 PE=4 SV=1            |
| CCG019271.1 | 801  | 146 | 51 | 7.83218633 | 2.225807884 | -1.815086013 | Down | 8.89E-17  | 3.35E-16  | AAEL009006-PA OS=Aedes aegypti GN=AAEL009006 PE=4 SV=1            |
| CCG019603.1 | 1011 | 148 | 51 | 6.29032712 | 1.763473902 | -1.83471482  | Down | 3.21E-17  | 1.22E-16  | AAEL007364-PA OS=Aedes aegypti GN=AAEL007364 PE=4 SV=1            |
| CCG025996.1 | 1758 | 181 | 51 | 4.42407393 | 1.014147961 | -2.125107341 | Down | 6.91E-25  | 2.81E-24  | AAEL003978-PA OS=Aedes aegypti GN=AAEL003978 PE=4 SV=1            |
| CCG017540.1 | 462  | 312 | 51 | 29.0185221 | 3.859030553 | -2.910663673 | Down | 1.09E-59  | 5.24E-59  | AAEL001985-PA OS=Aedes aegypti GN=AAEL001985 PE=4 SV=1            |
| CCG000954.2 | 1710 | 430 | 51 | 10.8052549 | 1.042615272 | -3.373454304 | Down | 3.66E-94  | 1.92E-93  | AAEL013966-PA OS=Aedes aegypti GN=AAEL013966 PE=4 SV=1            |
| CCG015721.1 | 567  | 801 | 51 | 60.7032759 | 3.144395265 | -4.270919887 | Down | 3.57E-210 | 2.14E-209 | AAEL000897-PA OS=Aedes aegypti GN=AAEL000897 PE=4 SV=1            |
| CCG002549.1 | 561  | 0   | 52 | 0.001      | 3.24033938  | 11.66192921  | Up   | 3.95E-14  | 1.36E-13  | AAEL006786-PA OS=Aedes aegypti GN=AAEL006786 PE=3 SV=1            |
| CCG016419.1 | 689  | 0   | 52 | 0.001      | 2.638360511 | 11.365426    | Up   | 3.95E-14  | 1.36E-13  | -                                                                 |
| CCG019502.1 | 876  | 0   | 52 | 0.001      | 2.075148849 | 11.01899911  | Up   | 3.95E-14  | 1.36E-13  | AAEL001693-PA OS=Aedes aegypti GN=AAEL001693 PE=3 SV=1            |
| CCG002901.1 | 1123 | 0   | 52 | 0.001      | 1.618726974 | 10.66064396  | Up   | 3.95E-14  | 1.36E-13  | -                                                                 |
| CCG009412.1 | 495  | 4   | 52 | 0.34723018 | 3.672384631 | 3.402752922  | Up   | 2.95E-05  | 5.02E-05  | -                                                                 |
| CCG006659.1 | 399  | 7   | 52 | 0.75385499 | 4.555965895 | 2.595398     | Up   | 4.38E-06  | 7.80E-06  | AAEL013061-PA OS=Aedes aegypti GN=AAEL013061 PE=4 SV=1            |
| CCG014401.1 | 658  | 10  | 52 | 0.65303548 | 2.76266017  | 2.080824827  | Up   | 2.69E-06  | 4.85E-06  | -                                                                 |
| CCG014244.1 | 1192 | 11  | 52 | 0.39653279 | 1.525025497 | 1.943321303  | Up   | 6.04E-06  | 1.07E-05  | Pol polyprotein (Fragment) OS=Anopheles gambiae PE=4 SV=1         |
| CCG003425.1 | 276  | 11  | 52 | 1.71256189 | 6.586342001 | 1.943321303  | Up   | 6.04E-06  | 1.07E-05  | -                                                                 |
| CCG025041.1 | 1098 | 12  | 52 | 0.46961459 | 1.655583235 | 1.817790421  | Up   | 1.46E-05  | 2.53E-05  | AAEL008911-PA OS=Aedes aegypti GN=AAEL008911 PE=4 SV=1            |

|             |      |     |    |            |             |              |      |           |            |                                                                                          |
|-------------|------|-----|----|------------|-------------|--------------|------|-----------|------------|------------------------------------------------------------------------------------------|
| CCG007493.1 | 930  | 14  | 52 | 0.64685622 | 1.954656336 | 1.595398     | Up   | 7.50E-05  | 0.00012414 | AAEL003277-PA OS=Aedes aegypti GN=AAEL003277 PE=3 SV=1                                   |
| CCG007481.1 | 1131 | 15  | 52 | 0.56989038 | 1.607277093 | 1.495862326  | Up   | 0.0001573 | 0.00025392 | AAEL013971-PA OS=Aedes aegypti GN=AAEL013971 PE=4 SV=1                                   |
| CCG021846.1 | 996  | 17  | 52 | 0.73341917 | 1.825130916 | 1.315290081  | Up   | 0.0006    | 0.00093369 | AAEL012398-PA OS=Aedes aegypti GN=AAEL012398 PE=4 SV=1                                   |
| CCG003321.1 | 5139 | 94  | 52 | 0.78598075 | 0.35373232  | -1.15183593  | Down | 2.22E-06  | 4.01E-06   | AAEL012157-PA (Fragment) OS=Aedes aegypti GN=AAEL012157 PE=4 SV=1                        |
| CCG019737.1 | 1806 | 96  | 52 | 2.28410549 | 1.006550605 | -1.182209579 | Down | 1.04E-06  | 1.92E-06   | AAEL002343-PA OS=Aedes aegypti GN=AAEL002343 PE=4 SV=1                                   |
| CCG020563.1 | 3078 | 99  | 52 | 1.38206749 | 0.590588172 | -1.226603698 | Down | 3.26E-07  | 6.13E-07   | AAEL012730-PA OS=Aedes aegypti GN=AAEL012730 PE=4 SV=1                                   |
| CCG001004.1 | 1138 | 101 | 52 | 3.81365834 | 1.597390503 | -1.255458561 | Down | 1.48E-07  | 2.82E-07   | AAEL014811-PA OS=Aedes aegypti GN=AAEL014811 PE=4 SV=1                                   |
| CCG018519.2 | 723  | 106 | 52 | 6.29985044 | 2.514288233 | -1.325167533 | Down | 1.96E-08  | 3.86E-08   | AAEL007750-PA OS=Aedes aegypti GN=AAEL007750 PE=4 SV=1                                   |
| CCG019163.1 | 459  | 115 | 52 | 10.7658376 | 3.960414798 | -1.442737129 | Down | 4.26E-10  | 8.88E-10   | Strakimin OS=Culex quinquefasciatus GN=CpipJ_CPIJ004208 PE=4 SV=1                        |
| CCG017623.1 | 1602 | 126 | 52 | 3.37964205 | 1.134725588 | -1.574527002 | Down | 3.00E-12  | 7.02E-12   | AAEL001312-PA OS=Aedes aegypti GN=CYP9M6 PE=3 SV=1                                       |
| CCG000554.1 | 1665 | 146 | 52 | 3.76791667 | 1.091790025 | -1.787071637 | Down | 1.89E-16  | 7.10E-16   | AAEL002741-PA OS=Aedes aegypti GN=SCRB6 PE=4 SV=2                                        |
| CCG022866.1 | 2274 | 188 | 52 | 3.55246707 | 0.79939771  | -2.15183593  | Down | 3.50E-26  | 1.44E-25   | Putative uncharacterized protein OS=Culex quinquefasciatus GN=CpipJ_CPIJ003307 PE=4 SV=1 |
| CCG015914.1 | 1599 | 195 | 52 | 5.24021154 | 1.136854529 | -2.204577392 | Down | 6.74E-28  | 2.80E-27   | Voltage-dependent para-like sodium channel (Fragment) OS=Aedes albopictus PE=2 SV=1      |
| CCG009459.1 | 468  | 199 | 52 | 18.2713188 | 3.884252975 | -2.233871699 | Down | 6.88E-29  | 2.88E-28   | AAEL004753-PA OS=Aedes aegypti GN=AAEL004753 PE=4 SV=1                                   |
| CCG013641.1 | 810  | 211 | 52 | 11.1933506 | 2.244235052 | -2.318346267 | Down | 6.67E-32  | 2.84E-31   | AAEL009974-PA OS=Aedes aegypti GN=AAEL009974 PE=3 SV=1                                   |

|             |      |     |    |            |             |              |      |           |            |                                                                                                                     |
|-------------|------|-----|----|------------|-------------|--------------|------|-----------|------------|---------------------------------------------------------------------------------------------------------------------|
| CCG012835.1 | 798  | 308 | 52 | 16.5848098 | 2.277982948 | -2.864033619 | Down | 5.64E-58  | 2.70E-57   | AAEL003532-PA (Fragment)<br>OS=Aedes aegypti<br>GN=AAEL003532 PE=4 SV=1                                             |
| CCG008912.1 | 696  | 515 | 52 | 31.7951341 | 2.611825276 | -3.6056757   | Down | 3.36E-119 | 1.83E-118  | AAEL011752-PA OS=Aedes<br>aegypti GN=GST11 PE=3 SV=2                                                                |
| CCG016354.1 | 3804 | 700 | 52 | 7.90715411 | 0.477873394 | -4.04845819  | Down | 5.49E-177 | 3.21E-176  | Putative uncharacterized protein<br>OS=Culex quinquefasciatus<br>GN=CpipJ_CPIJ018577 PE=4<br>SV=1                   |
| CCG015991.1 | 819  | 0   | 53 | 0.001      | 2.262257227 | 11.14354726  | Up   | 2.18E-14  | 7.61E-14   | AAEL011891-PA OS=Aedes<br>aegypti GN=AAEL011891 PE=3<br>SV=1                                                        |
| CCG014198.1 | 1059 | 0   | 53 | 0.001      | 1.749564371 | 10.77278003  | Up   | 2.18E-14  | 7.62E-14   | Uncharacterized protein<br>OS=Anopheles darlingi<br>GN=AND_02187 PE=4 SV=1                                          |
| CCG005014.1 | 790  | 1   | 53 | 0.05439207 | 2.345302113 | 5.430233658  | Up   | 0.000587  | 0.00091785 | -                                                                                                                   |
| CCG012020.1 | 381  | 2   | 53 | 0.22556291 | 4.862962386 | 4.430233658  | Up   | 9.36E-05  | 0.00015379 | Uncharacterized protein<br>OS=Anopheles darlingi<br>GN=AND_08690 PE=4 SV=1                                          |
| CCG003189.1 | 570  | 2   | 53 | 0.150771   | 3.250506437 | 4.430233658  | Up   | 9.36E-05  | 0.00015394 | -                                                                                                                   |
| CCG022084.1 | 1464 | 2   | 53 | 0.05870182 | 1.265566031 | 4.430233658  | Up   | 9.36E-05  | 0.0001538  | AAEL007619-PA OS=Aedes<br>aegypti GN=TOLL5A PE=4 SV=1                                                               |
| CCG000729.1 | 691  | 6   | 53 | 0.37310913 | 2.681315006 | 2.845271158  | Up   | 8.39E-06  | 1.47E-05   | -                                                                                                                   |
| CCG012064.1 | 831  | 6   | 53 | 0.31025079 | 2.229589253 | 2.845271158  | Up   | 8.39E-06  | 1.47E-05   | AAEL012561-PA OS=Aedes<br>aegypti GN=AAEL012561 PE=4<br>SV=1                                                        |
| CCG018331.1 | 1263 | 7   | 53 | 0.23815372 | 1.466974401 | 2.622878736  | Up   | 4.35E-06  | 7.76E-06   | Predicted protein OS=Culex<br>quinquefasciatus<br>GN=CpipJ_CPIJ019142 PE=4<br>SV=1                                  |
| CCG018445.1 | 1890 | 8   | 53 | 0.18188247 | 0.980311465 | 2.430233658  | Up   | 2.33E-06  | 4.21E-06   | Acyl-coa dehydrogenase<br>(Fragment) OS=Culex<br>quinquefasciatus<br>GN=CpipJ_CPIJ016452 PE=3<br>SV=1               |
| CCG005873.1 | 578  | 9   | 53 | 0.66907891 | 3.205516728 | 2.260308657  | Up   | 1.57E-06  | 2.86E-06   | Retrovirus-related Pol polyprotein<br>from transposon TNT 1-94<br>OS=Trichinella spiralis<br>GN=Tsp_00504 PE=4 SV=1 |

|             |      |     |    |            |             |              |      |           |            |                                                                         |
|-------------|------|-----|----|------------|-------------|--------------|------|-----------|------------|-------------------------------------------------------------------------|
| CCG028153.1 | 483  | 10  | 53 | 0.88964254 | 3.836001385 | 2.108305563  | Up   | 1.94E-06  | 3.53E-06   | AAEL009155-PA OS=Aedes aegypti GN=AAEL009155 PE=4 SV=1                  |
| CCG014753.1 | 1296 | 10  | 53 | 0.33155659 | 1.429620887 | 2.108305563  | Up   | 1.94E-06  | 3.53E-06   | AAEL004614-PA OS=Aedes aegypti GN=AAEL004614 PE=4 SV=1                  |
| CCG025717.1 | 843  | 11  | 53 | 0.56069642 | 2.197851327 | 1.97080204   | Up   | 4.07E-06  | 7.29E-06   | Moulier or mag4 OS=Culex quinquefasciatus GN=CpipJ_CPIJ001640 PE=4 SV=1 |
| CCG019731.1 | 690  | 12  | 53 | 0.74729973 | 2.685200969 | 1.845271158  | Up   | 9.80E-06  | 1.71E-05   | AAEL010667-PA OS=Aedes aegypti GN=AAEL010667 PE=3 SV=1                  |
| CCG004378.1 | 1494 | 16  | 53 | 0.46018457 | 1.240153058 | 1.430233658  | Up   | 0.0002226 | 0.00035683 | AAEL002671-PA OS=Aedes aegypti GN=AAEL002671 PE=4 SV=1                  |
| CCG018204.1 | 1681 | 17  | 53 | 0.43455413 | 1.10219433  | 1.342770817  | Up   | 0.0004307 | 0.00067977 | AAEL013982-PA OS=Aedes aegypti GN=AAEL013982 PE=4 SV=1                  |
| CCG020580.1 | 213  | 17  | 53 | 3.42950934 | 8.698538352 | 1.342770817  | Up   | 0.0004307 | 0.00067981 | -                                                                       |
| CCG009445.2 | 222  | 95  | 53 | 18.3879495 | 8.345894905 | -1.13962195  | Down | 2.39E-06  | 4.32E-06   | AAEL010673-PA OS=Aedes aegypti GN=AAEL010673 PE=4 SV=1                  |
| CCG006649.1 | 360  | 118 | 53 | 14.0845241 | 5.146635191 | -1.452409391 | Down | 2.05E-10  | 4.33E-10   | AAEL005747-PA OS=Aedes aegypti GN=AAEL005747 PE=4 SV=1                  |
| CCG003970.1 | 1518 | 139 | 53 | 3.93464632 | 1.220545895 | -1.688707414 | Down | 1.23E-14  | 4.40E-14   | AAEL004491-PA OS=Aedes aegypti GN=AAEL004491 PE=4 SV=1                  |
| CCG007171.1 | 2282 | 148 | 53 | 2.7868189  | 0.811914404 | -1.779219707 | Down | 1.46E-16  | 5.49E-16   | -                                                                       |
| CCG017257.1 | 1563 | 234 | 53 | 6.43308887 | 1.185405418 | -2.440131061 | Down | 2.35E-37  | 1.04E-36   | AAEL011144-PA OS=Aedes aegypti GN=AAEL011144 PE=3 SV=1                  |
| CCG025362.1 | 1587 | 264 | 53 | 7.1480844  | 1.167478682 | -2.614160461 | Down | 2.63E-45  | 1.20E-44   | AAEL009237-PA OS=Aedes aegypti GN=AAEL009237 PE=3 SV=1                  |
| CCG027139.1 | 1575 | 318 | 53 | 8.67579404 | 1.176373758 | -2.882649297 | Down | 3.32E-60  | 1.60E-59   | AAEL005200-PA (Fragment) OS=Aedes aegypti GN=AAEL005200 PE=4 SV=2       |
| CCG009543.1 | 487  | 0   | 54 | 0.001      | 3.876277096 | 11.92045599  | Up   | 1.20E-14  | 4.28E-14   | GL12416 OS=Drosophila persimilis GN=GL12416 PE=3 SV=1                   |
| CCG018104.1 | 468  | 1   | 54 | 0.09181567 | 4.03364732  | 5.457200706  | Up   | 0.000587  | 0.00091757 | AAEL009493-PA OS=Aedes aegypti GN=AAEL009493 PE=4 SV=1                  |
| CCG009644.1 | 1275 | 2   | 54 | 0.06740351 | 1.48058584  | 4.457200706  | Up   | 9.36E-05  | 0.00015358 | AAEL014550-PA (Fragment) OS=Aedes aegypti GN=AAEL014550 PE=3 SV=1       |

|             |      |     |    |            |             |              |      |           |            |                                                                                                                                                                              |
|-------------|------|-----|----|------------|-------------|--------------|------|-----------|------------|------------------------------------------------------------------------------------------------------------------------------------------------------------------------------|
| CCG024719.1 | 795  | 2   | 54 | 0.10809996 | 2.37452446  | 4.457200706  | Up   | 9.36E-05  | 0.00015331 | AAEL006919-PA OS=Aedes aegypti GN=AAEL006919 PE=3 SV=1                                                                                                                       |
| CCG015504.1 | 679  | 5   | 54 | 0.31641925 | 2.78018696  | 3.135272611  | Up   | 1.59E-05  | 2.76E-05   | Stromal antigen OS=Culex quinquefasciatus GN=CpipJ_CPIJ009961 PE=4 SV=1                                                                                                      |
| CCG003007.1 | 1002 | 6   | 54 | 0.2573038  | 1.883978988 | 2.872238205  | Up   | 8.38E-06  | 1.47E-05   | AAEL014348-PB OS=Aedes aegypti GN=CASPS8 PE=4 SV=1                                                                                                                           |
| CCG019957.1 | 1656 | 9   | 54 | 0.23353117 | 1.139943808 | 2.287275705  | Up   | 1.40E-06  | 2.55E-06   | AAEL011904-PC OS=Aedes aegypti GN=AAEL011904 PE=4 SV=1                                                                                                                       |
| CCG021224.1 | 549  | 13  | 54 | 1.01749827 | 3.438519027 | 1.756760988  | Up   | 1.56E-05  | 2.71E-05   | AAEL010722-PA OS=Aedes aegypti GN=AAEL010722 PE=4 SV=1                                                                                                                       |
| CCG027783.1 | 882  | 14  | 54 | 0.68205928 | 2.14030266  | 1.649845784  | Up   | 3.55E-05  | 6.01E-05   | AAEL001027-PA OS=Aedes aegypti GN=AAEL001027 PE=4 SV=1                                                                                                                       |
| CCG004490.1 | 1005 | 15  | 54 | 0.64133932 | 1.87835517  | 1.55031011   | Up   | 7.65E-05  | 0.0001266  | Putative reverse transcriptase OS=Anopheles gambiae PE=4 SV=1                                                                                                                |
| CCG013308.1 | 1245 | 16  | 54 | 0.55222149 | 1.516262607 | 1.457200706  | Up   | 0.000157  | 0.00025356 | AAEL013617-PA OS=Aedes aegypti GN=AAEL013617 PE=4 SV=1                                                                                                                       |
| CCG004544.1 | 1401 | 17  | 54 | 0.52140292 | 1.347428227 | 1.369737865  | Up   | 0.0003079 | 0.00048958 | Uncharacterized protein OS=Anopheles darlingi GN=AND_22260 PE=4 SV=1                                                                                                         |
| CCG023151.1 | 1410 | 99  | 54 | 3.01702392 | 1.338827621 | -1.172155914 | Down | 8.39E-07  | 1.55E-06   | AAEL003378-PA (Fragment) OS=Aedes aegypti GN=GPRNNA1 PE=4 SV=2                                                                                                               |
| CCG011778.1 | 2067 | 103 | 54 | 2.14121077 | 0.913278638 | -1.229299821 | Down | 1.80E-07  | 3.41E-07   | AAEL011763-PA OS=Aedes aegypti GN=PPO3 PE=4 SV=1                                                                                                                             |
| CCG006876.1 | 989  | 103 | 54 | 4.47510886 | 1.90874312  | -1.229299821 | Down | 1.80E-07  | 3.41E-07   | AAEL005162-PA OS=Aedes aegypti GN=AAEL005162 PE=3 SV=1                                                                                                                       |
| CCG005813.1 | 576  | 107 | 54 | 7.98222501 | 3.277338447 | -1.28426628  | Down | 3.67E-08  | 7.16E-08   | -                                                                                                                                                                            |
| CCG024738.1 | 1053 | 130 | 54 | 5.30490551 | 1.792732142 | -1.565167107 | Down | 1.70E-12  | 4.08E-12   | LINE-1 retrotransposon-like element, putative (Fragment) OS=Aspergillus flavus (strain ATCC 200026 / FGSC A1120 / NRRL 3357 / JCM 12722 / SRRC 167) GN=AFLA_063980 PE=4 SV=1 |

|             |      |     |    |            |             |              |      |           |            |                                                                          |
|-------------|------|-----|----|------------|-------------|--------------|------|-----------|------------|--------------------------------------------------------------------------|
| CCG017760.1 | 705  | 134 | 54 | 8.16729708 | 2.677655242 | -1.608888484 | Down | 2.64E-13  | 7.39E-13   | Nuclear hormone receptor<br>OS=Aedes aegypti PE=2 SV=1                   |
| CCG011891.1 | 723  | 151 | 54 | 8.97431525 | 2.610991626 | -1.781204033 | Down | 6.84E-17  | 2.58E-16   | AAEL000340-PA OS=Aedes<br>aegypti GN=AAEL000340 PE=3<br>SV=1             |
| CCG003427.1 | 1128 | 183 | 54 | 6.97115375 | 1.673534526 | -2.058499132 | Down | 3.45E-24  | 1.39E-23   | AAEL001912-PA OS=Aedes<br>aegypti GN=AAEL001912 PE=4<br>SV=1             |
| CCG022416.1 | 1296 | 203 | 54 | 6.73059886 | 1.456594866 | -2.208135211 | Down | 4.92E-29  | 2.07E-28   | AAEL003953-PA OS=Aedes<br>aegypti GN=AAEL003953 PE=4<br>SV=1             |
| CCG018423.1 | 1077 | 249 | 54 | 9.93450689 | 1.752782679 | -2.502801226 | Down | 8.38E-41  | 3.75E-40   | AAEL007018-PA OS=Aedes<br>aegypti GN=AAEL007018 PE=3<br>SV=1             |
| CCG008002.1 | 480  | 301 | 54 | 26.9456044 | 3.932806137 | -2.776418971 | Down | 6.97E-55  | 3.31E-54   | Hydroxypyruvate isomerase<br>OS=Aedes aegypti<br>GN=AAEL002165 PE=3 SV=1 |
| CCG026199.1 | 786  | 548 | 54 | 29.9585427 | 2.401713671 | -3.640831377 | Down | 9.06E-128 | 5.01E-127  | AAEL014108-PA OS=Aedes<br>aegypti GN=AAEL014108 PE=4<br>SV=1             |
| CCG008058.1 | 743  | 697 | 54 | 40.309428  | 2.540709214 | -3.98781414  | Down | 2.95E-174 | 1.72E-173  | Mitochondrial ATP synthase F<br>chain OS=Culex tarsalis PE=4<br>SV=1     |
| CCG008065.1 | 351  | 0   | 55 | 0.001      | 5.477792657 | 12.41937894  | Up   | 6.66E-15  | 2.40E-14   | -                                                                        |
| CCG002773.1 | 1101 | 2   | 55 | 0.07805583 | 1.746326269 | 4.483672917  | Up   | 9.36E-05  | 0.00015409 | AAEL000979-PA OS=Aedes<br>aegypti GN=AAEL000979 PE=4<br>SV=1             |
| CCG014813.1 | 1710 | 2   | 55 | 0.050257   | 1.124389019 | 4.483672917  | Up   | 9.36E-05  | 0.00015374 | AAEL000747-PA OS=Aedes<br>aegypti GN=AAEL000747 PE=4<br>SV=1             |
| CCG022296.1 | 498  | 3   | 55 | 0.25885382 | 3.86085386  | 3.898710417  | Up   | 5.28E-05  | 8.84E-05   | AAEL013683-PA OS=Aedes<br>aegypti GN=AAEL013683 PE=4<br>SV=1             |
| CCG000924.1 | 606  | 4   | 55 | 0.28362861 | 3.172780895 | 3.483672917  | Up   | 2.95E-05  | 5.02E-05   | AAEL013310-PA OS=Aedes<br>aegypti GN=AAEL013310 PE=4<br>SV=1             |
| CCG007426.1 | 768  | 4   | 55 | 0.2238007  | 2.503522425 | 3.483672917  | Up   | 2.95E-05  | 5.02E-05   | AAEL004104-PA OS=Aedes<br>aegypti GN=AAEL004104 PE=4<br>SV=1             |
| CCG019498.1 | 2640 | 8   | 55 | 0.13021132 | 0.728297433 | 2.483672917  | Up   | 2.24E-06  | 4.06E-06   | AAEL009404-PA OS=Aedes<br>aegypti GN=AAEL009404 PE=4<br>SV=1             |
| CCG023319.1 | 2211 | 12  | 55 | 0.2332143  | 0.869608875 | 1.898710417  | Up   | 4.43E-06  | 7.89E-06   | AGAP003323-PA OS=Anopheles<br>gambiae GN=AgaP_AGAP003323<br>PE=3 SV=5    |
| CCG023855.1 | 1386 | 15  | 55 | 0.46504042 | 1.387233205 | 1.576782322  | Up   | 5.31E-05  | 8.86E-05   | AAEL008547-PA OS=Aedes<br>aegypti GN=AAEL008547 PE=4<br>SV=1             |

|             |      |       |    |            |             |              |      |           |            |                                                                      |
|-------------|------|-------|----|------------|-------------|--------------|------|-----------|------------|----------------------------------------------------------------------|
| CCG017887.1 | 204  | 18    | 55 | 3.79144717 | 9.4250256   | 1.313747916  | Up   | 0.0004175 | 0.00065925 | AAEL003160-PA OS=Aedes aegypti GN=AAEL003160 PE=4 SV=1               |
| CCG023924.1 | 813  | 90    | 55 | 4.75679719 | 2.364951073 | -1.008180179 | Down | 3.28E-05  | 5.55E-05   | AAEL012645-PA OS=Aedes aegypti GN=AAEL012645 PE=4 SV=1               |
| CCG002727.1 | 582  | 99    | 55 | 7.30928475 | 3.303617221 | -1.145683703 | Down | 1.32E-06  | 2.42E-06   | AAEL000419-PA OS=Aedes aegypti GN=AAEL000419 PE=4 SV=1               |
| CCG012015.1 | 1695 | 137   | 55 | 3.47307    | 1.134339364 | -1.614359166 | Down | 1.25E-13  | 3.84E-13   | AAEL013023-PA OS=Aedes aegypti GN=AAEL013023 PE=4 SV=1               |
| CCG024659.1 | 1080 | 147   | 55 | 5.84865832 | 1.780282613 | -1.715999427 | Down | 1.03E-15  | 3.74E-15   | -                                                                    |
| CCG001341.1 | 1530 | 151   | 55 | 4.24080387 | 1.25667008  | -1.754731822 | Down | 1.43E-16  | 5.38E-16   | Gooseberry OS=Culex quinquefasciatus GN=CpipJ_CPIJ006496 PE=3 SV=1   |
| CCG021663.1 | 387  | 175   | 55 | 19.4307585 | 4.968230549 | -1.967538194 | Down | 6.13E-22  | 2.43E-21   | -                                                                    |
| CCG008680.1 | 3609 | 183   | 55 | 2.17884772 | 0.532752902 | -2.032026921 | Down | 8.32E-24  | 3.35E-23   | AAEL001494-PA OS=Aedes aegypti GN=AAEL001494 PE=4 SV=1               |
| CCG007634.1 | 356  | 192   | 55 | 23.1746883 | 5.400857367 | -2.101289583 | Down | 6.01E-26  | 2.46E-25   | AAEL014300-PA OS=Aedes aegypti GN=AAEL014300 PE=4 SV=1               |
| CCG020101.1 | 822  | 222   | 55 | 11.6049648 | 2.339057448 | -2.310742949 | Down | 2.36E-33  | 1.01E-32   | AGAP000697-PA OS=Anopheles gambiae GN=AgaP_AGAP000697 PE=4 SV=4      |
| CCG016863.1 | 1782 | 291   | 55 | 7.01694319 | 1.07895916  | -2.701202426 | Down | 1.40E-51  | 6.57E-51   | AAEL007106-PA OS=Aedes aegypti GN=AAEL007106 PE=3 SV=1               |
| CCG007678.2 | 1629 | 598   | 55 | 15.7740339 | 1.180297865 | -3.740328757 | Down | 2.07E-142 | 1.17E-141  | AAEL004114-PA OS=Aedes aegypti GN=AAEL004114 PE=4 SV=1               |
| CCG022167.1 | 4354 | 902   | 55 | 8.9018605  | 0.441595136 | -4.333310706 | Down | 8.23E-239 | 5.04E-238  | Uncharacterized protein OS=Anopheles darlingi GN=AND_05226 PE=4 SV=1 |
| CCG000788.1 | 798  | 30672 | 55 | 1651.5886  | 2.409405041 | -9.420961704 | Down | 0         | 0          | AAEL003049-PA OS=Aedes aegypti GN=AAEL003049 PE=4 SV=1               |
| CCG003899.1 | 600  | 0     | 56 | 0.001      | 3.262772499 | 11.67188268  | Up   | 3.77E-15  | 1.36E-14   | AAEL009434-PA OS=Aedes aegypti GN=AAEL009434 PE=4 SV=1               |
| CCG025524.1 | 672  | 0     | 56 | 0.001      | 2.913189731 | 11.50838395  | Up   | 3.77E-15  | 1.36E-14   | -                                                                    |
| CCG002213.1 | 1042 | 0     | 56 | 0.001      | 1.878755757 | 10.87556181  | Up   | 3.77E-15  | 1.36E-14   | -                                                                    |
| CCG021054.1 | 726  | 2     | 56 | 0.11837392 | 2.696506197 | 4.509668126  | Up   | 9.36E-05  | 0.00015398 | AAEL012824-PA OS=Aedes aegypti GN=AAEL012824 PE=3 SV=1               |



|             |      |     |    |            |             |              |      |          |          |                                                                                                   |
|-------------|------|-----|----|------------|-------------|--------------|------|----------|----------|---------------------------------------------------------------------------------------------------|
| CCG010596.1 | 924  | 6   | 56 | 0.27902425 | 2.118683441 | 2.924705625  | Up   | 8.38E-06 | 1.47E-05 | Putative uncharacterized protein<br>OS=Culex quinquefasciatus<br>GN=CpipJ_CPIJ011306 PE=4<br>SV=1 |
| CCG021879.1 | 1305 | 8   | 56 | 0.263416   | 1.500125287 | 2.509668126  | Up   | 2.22E-06 | 4.02E-06 | Pol-like protein OS=Aedes aegypti<br>PE=4 SV=1                                                    |
| CCG000256.1 | 648  | 9   | 56 | 0.59680187 | 3.021085647 | 2.339743124  | Up   | 1.22E-06 | 2.23E-06 | AAEL010576-PA OS=Aedes<br>aegypti GN=AAEL010576 PE=4<br>SV=1                                      |
| CCG012764.1 | 564  | 10  | 56 | 0.76187473 | 3.471034573 | 2.187740031  | Up   | 9.21E-07 | 1.70E-06 | AAEL010373-PA OS=Aedes<br>aegypti GN=AAEL010373 PE=4<br>SV=1                                      |
| CCG027969.1 | 822  | 11  | 56 | 0.57502078 | 2.381585766 | 2.050236507  | Up   | 1.34E-06 | 2.46E-06 | AAEL013971-PA OS=Aedes<br>aegypti GN=AAEL013971 PE=4<br>SV=1                                      |
| CCG005786.1 | 4401 | 12  | 56 | 0.11716356 | 0.444822427 | 1.924705625  | Up   | 2.98E-06 | 5.36E-06 | AAEL008598-PA OS=Aedes<br>aegypti GN=AAEL008598 PE=4<br>SV=1                                      |
| CCG020250.1 | 857  | 14  | 56 | 0.70195599 | 2.284321469 | 1.702313204  | Up   | 1.66E-05 | 2.86E-05 | -                                                                                                 |
| CCG002997.1 | 2589 | 92  | 56 | 1.52692761 | 0.756146581 | -1.01389383  | Down | 2.45E-05 | 4.21E-05 | Putative uncharacterized protein<br>OS=Culex quinquefasciatus<br>GN=CpipJ_CPIJ001896 PE=4<br>SV=1 |
| CCG022273.1 | 1711 | 97  | 56 | 2.43603989 | 1.144163354 | -1.090244716 | Down | 4.25E-06 | 7.61E-06 | AAEL003213-PA OS=Aedes<br>aegypti GN=AAEL003213 PE=4<br>SV=1                                      |
| CCG025616.1 | 834  | 99  | 56 | 5.10072389 | 2.347318344 | -1.119688494 | Down | 2.06E-06 | 3.74E-06 | FAD oxidoreductase OS=Culex<br>quinquefasciatus<br>GN=CpipJ_CPIJ016820 PE=4<br>SV=1               |
| CCG006861.1 | 892  | 102 | 56 | 4.91357952 | 2.194690022 | -1.162757216 | Down | 6.76E-07 | 1.25E-06 | Reverse transcriptase<br>OS=Anopheles gambiae PE=4<br>SV=1                                        |
| CCG017654.1 | 822  | 118 | 56 | 6.16840473 | 2.381585766 | -1.372974923 | Down | 1.12E-09 | 2.31E-09 | AAEL000024-PA OS=Aedes<br>aegypti GN=AAEL000024 PE=4<br>SV=1                                      |
| CCG020123.1 | 5202 | 121 | 56 | 0.99948825 | 0.376329008 | -1.409195111 | Down | 3.13E-10 | 6.57E-10 | AAEL005155-PA OS=Aedes<br>aegypti GN=AAEL005155 PE=4<br>SV=1                                      |
| CCG013397.1 | 1843 | 146 | 56 | 3.40400502 | 1.062215681 | -1.680156433 | Down | 3.37E-15 | 1.22E-14 | Putative uncharacterized protein<br>OS=Tribolium castaneum<br>GN=TcasGA2_TC006955 PE=4<br>SV=1    |

|             |      |     |    |            |             |              |      |           |            |                                                                                         |
|-------------|------|-----|----|------------|-------------|--------------|------|-----------|------------|-----------------------------------------------------------------------------------------|
| CCG024702.1 | 1620 | 257 | 56 | 6.81680358 | 1.208434259 | -2.495956423 | Down | 6.23E-42  | 2.80E-41   | AAEL005533-PA (Fragment)<br>OS=Aedes aegypti<br>GN=AAEL005533 PE=4 SV=1                 |
| CCG010215.1 | 4608 | 339 | 56 | 3.1611849  | 0.424840169 | -2.895473337 | Down | 2.30E-64  | 1.12E-63   | AAEL011867-PA OS=Aedes<br>aegypti GN=AAEL011867 PE=4<br>SV=1                            |
| CCG013320.1 | 916  | 387 | 56 | 18.1542438 | 2.137187226 | -3.08652163  | Down | 4.22E-78  | 2.13E-77   | Copia OS=Drosophila simulans<br>GN=GIP PE=4 SV=1                                        |
| CCG017548.1 | 1491 | 654 | 56 | 18.8478916 | 1.312986921 | -3.8434787   | Down | 5.10E-159 | 2.93E-158  | Amino acid transporter OS=Culex<br>quinquefasciatus<br>GN=CpipJ_CPIJ007170 PE=4<br>SV=1 |
| CCG018253.1 | 2148 | 886 | 56 | 17.7240153 | 0.911388966 | -4.281494763 | Down | 1.10E-232 | 6.69E-232  | AAEL009203-PA OS=Aedes<br>aegypti GN=AAEL009203 PE=3<br>SV=1                            |
| CCG010539.1 | 486  | 0   | 57 | 0.001      | 4.100044807 | 12.00142396  | Up   | 2.22E-15  | 8.04E-15   | tRNA-dihydrouridine synthase<br>OS=Aedes aegypti<br>GN=AAEL005898 PE=3 SV=1             |
| CCG023824.1 | 522  | 0   | 57 | 0.001      | 3.817283096 | 11.89833047  | Up   | 2.22E-15  | 8.05E-15   | AAEL004355-PA OS=Aedes<br>aegypti GN=AAEL004355 PE=4<br>SV=1                            |
| CCG011106.1 | 2979 | 0   | 57 | 0.001      | 0.668889485 | 9.385624056  | Up   | 2.22E-15  | 8.05E-15   | AAEL003766-PA OS=Aedes<br>aegypti GN=AAEL003766 PE=4<br>SV=1                            |
| CCG005446.1 | 750  | 1   | 57 | 0.05729298 | 2.656829035 | 5.535203218  | Up   | 0.000587  | 0.00091694 | AAEL002960-PA OS=Aedes<br>aegypti GN=AAEL002960 PE=4<br>SV=1                            |
| CCG016055.1 | 968  | 2   | 57 | 0.08878044 | 2.05849357  | 4.535203218  | Up   | 9.36E-05  | 0.00015378 | AAEL013652-PA OS=Aedes<br>aegypti GN=AAEL013652 PE=3<br>SV=1                            |
| CCG024059.1 | 2064 | 2   | 57 | 0.04163734 | 0.965417527 | 4.535203218  | Up   | 9.36E-05  | 0.00015323 | AAEL012229-PA OS=Aedes<br>aegypti GN=AAEL012229 PE=4<br>SV=1                            |
| CCG003644.1 | 1182 | 2   | 57 | 0.07270683 | 1.685805225 | 4.535203218  | Up   | 9.36E-05  | 0.00015335 | AAEL014020-PA OS=Aedes<br>aegypti GN=AAEL014020 PE=4<br>SV=1                            |
| CCG026649.1 | 636  | 3   | 57 | 0.20268743 | 3.133053107 | 3.950240717  | Up   | 5.28E-05  | 8.86E-05   | -                                                                                       |
| CCG019966.1 | 1032 | 4   | 57 | 0.16654936 | 1.930835054 | 3.535203218  | Up   | 2.95E-05  | 5.03E-05   | AAEL009977-PA OS=Aedes<br>aegypti GN=AAEL009977 PE=4<br>SV=1                            |
| CCG018647.1 | 2949 | 4   | 57 | 0.0582838  | 0.675694058 | 3.535203218  | Up   | 2.95E-05  | 5.04E-05   | GM18987 OS=Drosophila<br>sechellia GN=GM18987 PE=4<br>SV=1                              |
| CCG006413.1 | 342  | 5   | 57 | 0.62821249 | 5.826379462 | 3.213275123  | Up   | 1.59E-05  | 2.76E-05   | -                                                                                       |
| CCG026976.1 | 630  | 8   | 57 | 0.54564742 | 3.162891708 | 2.535203218  | Up   | 2.21E-06  | 3.99E-06   | -                                                                                       |

|             |      |     |    |            |             |              |      |           |            |                                                                             |
|-------------|------|-----|----|------------|-------------|--------------|------|-----------|------------|-----------------------------------------------------------------------------|
| CCG001282.1 | 892  | 8   | 57 | 0.38537879 | 2.233880915 | 2.535203218  | Up   | 2.21E-06  | 3.99E-06   | AAEL010264-PA OS=Aedes aegypti GN=AAEL010264 PE=4 SV=1                      |
| CCG004161.1 | 707  | 8   | 57 | 0.48622048 | 2.818418354 | 2.535203218  | Up   | 2.21E-06  | 3.99E-06   | -                                                                           |
| CCG027064.1 | 309  | 9   | 57 | 1.25154567 | 6.448614162 | 2.365278217  | Up   | 1.17E-06  | 2.15E-06   | AAEL003080-PA OS=Aedes aegypti GN=AAEL003080 PE=4 SV=1                      |
| CCG017318.1 | 579  | 14  | 57 | 1.03899186 | 3.441488387 | 1.727848296  | Up   | 1.13E-05  | 1.97E-05   | AAEL001815-PA OS=Aedes aegypti GN=AAEL001815 PE=4 SV=1                      |
| CCG012507.1 | 937  | 14  | 57 | 0.64202378 | 2.126597413 | 1.727848296  | Up   | 1.13E-05  | 1.97E-05   | AAEL001621-PA OS=Aedes aegypti GN=AAEL001621 PE=4 SV=1                      |
| CCG005667.1 | 717  | 18  | 57 | 1.07873811 | 2.779109869 | 1.365278217  | Up   | 0.0002148 | 0.00034468 | AAEL014714-PA OS=Aedes aegypti GN=AAEL014714 PE=4 SV=1                      |
| CCG003820.1 | 2436 | 18  | 57 | 0.31751035 | 0.817989235 | 1.365278217  | Up   | 0.0002148 | 0.00034473 | AAEL001230-PA OS=Aedes aegypti GN=AAEL001230 PE=4 SV=1                      |
| CCG017370.1 | 294  | 18  | 57 | 2.63080008 | 6.777625089 | 1.365278217  | Up   | 0.0002148 | 0.0003447  | AAEL010419-PA OS=Aedes aegypti GN=AAEL010419 PE=4 SV=1                      |
| CCG020227.1 | 702  | 18  | 57 | 1.10178807 | 2.838492558 | 1.365278217  | Up   | 0.0002148 | 0.00034466 | AAEL000465-PA OS=Aedes aegypti GN=AAEL000465 PE=4 SV=1                      |
| CCG016688.1 | 1335 | 96  | 57 | 3.08995844 | 1.492600581 | -1.049759283 | Down | 9.20E-06  | 1.61E-05   | Oxysterol-binding protein OS=Aedes aegypti GN=AAEL012056 PE=3 SV=1          |
| CCG003717.2 | 2284 | 97  | 57 | 1.82489679 | 0.872426347 | -1.064709624 | Down | 6.47E-06  | 1.15E-05   | Zinc finger protein OS=Culex quinquefasciatus GN=CpipJ_CPIJ012788 PE=4 SV=1 |
| CCG027446.1 | 736  | 98  | 57 | 5.72151358 | 2.707366544 | -1.079506626 | Down | 4.54E-06  | 8.08E-06   | -                                                                           |
| CCG012133.1 | 513  | 109 | 57 | 9.13002158 | 3.884252975 | -1.232981107 | Down | 7.36E-08  | 1.42E-07   | AAEL001068-PA OS=Aedes aegypti GN=AAEL001068 PE=4 SV=1                      |
| CCG013073.1 | 351  | 120 | 57 | 14.6905076 | 5.676985117 | -1.371687378 | Down | 8.36E-10  | 1.73E-09   | AAEL006255-PA OS=Aedes aegypti GN=AAEL006255 PE=4 SV=1                      |
| CCG007590.1 | 1461 | 131 | 57 | 3.85286464 | 1.363875274 | -1.498219784 | Down | 6.98E-12  | 1.57E-11   | AAEL005176-PA OS=Aedes aegypti GN=AAEL005176 PE=4 SV=1                      |
| CCG004206.1 | 1179 | 154 | 57 | 5.61267102 | 1.690094806 | -1.731583323 | Down | 1.38E-16  | 5.21E-16   | AAEL000196-PA OS=Aedes aegypti GN=AAEL000196 PE=3 SV=1                      |

|             |      |      |    |            |             |              |      |           |            |                                                                                                                    |
|-------------|------|------|----|------------|-------------|--------------|------|-----------|------------|--------------------------------------------------------------------------------------------------------------------|
| CCG011023.1 | 1923 | 163  | 57 | 3.6422604  | 1.036204772 | -1.813524936 | Down | 1.55E-18  | 5.95E-18   | Chondroitin beta-1,4-N-acetyl galactosaminyl transferase 1 OS=Culex quinquefasciatus GN=CpipJ_CPIJ019283 PE=4 SV=1 |
| CCG009743.1 | 1368 | 166  | 57 | 5.2141637  | 1.456594866 | -1.839836213 | Down | 3.36E-19  | 1.30E-18   | AAEL001404-PA OS=Aedes aegypti GN=AAEL001404 PE=4 SV=1                                                             |
| CCG010875.1 | 2316 | 167  | 57 | 3.09842214 | 0.860372097 | -1.848501074 | Down | 2.02E-19  | 7.82E-19   | -                                                                                                                  |
| CCG025508.1 | 405  | 205  | 57 | 21.7501126 | 4.920053768 | -2.144276882 | Down | 2.75E-28  | 1.14E-27   | Putative uncharacterized protein OS=Culex quinquefasciatus GN=CpipJ_CPIJ008280 PE=4 SV=1                           |
| CCG022867.1 | 2331 | 274  | 57 | 5.05092548 | 0.854835597 | -2.562828865 | Down | 6.09E-46  | 2.79E-45   | AAEL012615-PA OS=Aedes aegypti GN=AAEL012615 PE=4 SV=1                                                             |
| CCG006671.1 | 1395 | 316  | 57 | 9.73364598 | 1.428402707 | -2.76857753  | Down | 2.31E-57  | 1.10E-56   | Beta-galactosidase OS=Aedes aegypti GN=AAEL004575 PE=3 SV=1                                                        |
| CCG004920.1 | 773  | 754  | 57 | 41.9135574 | 2.577777201 | -4.023217495 | Down | 1.28E-189 | 7.58E-189  | AAEL002192-PA OS=Aedes aegypti GN=AAEL002192 PE=4 SV=1                                                             |
| CCG011624.1 | 567  | 1649 | 57 | 124.968417 | 3.51432412  | -5.152172465 | Down | 0         | 0          | -                                                                                                                  |
| CCG000283.1 | 756  | 5204 | 57 | 295.786374 | 2.63574309  | -6.810202029 | Down | 0         | 0          | AAEL011798-PA OS=Aedes aegypti GN=AAEL011798 PE=4 SV=1                                                             |
| CCG009600.1 | 429  | 0    | 58 | 0.001      | 4.726293829 | 12.20649361  | Up   | 1.33E-15  | 4.84E-15   | AAEL005568-PA OS=Aedes aegypti GN=AAEL005568 PE=4 SV=1                                                             |
| CCG025780.1 | 1164 | 1    | 58 | 0.03691558 | 1.741907262 | 5.560294199  | Up   | 0.000587  | 0.00091552 | AAEL000130-PA OS=Aedes aegypti GN=AAEL000130 PE=4 SV=1                                                             |
| CCG022185.1 | 5617 | 2    | 58 | 0.01529989 | 0.360972059 | 4.560294199  | Up   | 9.36E-05  | 0.000154   | Putative uncharacterized protein OS=Culex quinquefasciatus GN=CpipJ_CPIJ018804 PE=4 SV=1                           |
| CCG002202.2 | 1522 | 2    | 58 | 0.05646483 | 1.332181375 | 4.560294199  | Up   | 9.36E-05  | 0.00015341 | AAEL015565-PA OS=Aedes aegypti GN=AAEL015565 PE=4 SV=1                                                             |
| CCG013902.1 | 423  | 3    | 58 | 0.30474989 | 4.793333458 | 3.975331698  | Up   | 5.28E-05  | 8.86E-05   | AAEL010576-PA OS=Aedes aegypti GN=AAEL010576 PE=4 SV=1                                                             |
| CCG012569.1 | 653  | 3    | 58 | 0.19741073 | 3.105023052 | 3.975331698  | Up   | 5.28E-05  | 8.85E-05   | AAEL002948-PA OS=Aedes aegypti GN=AAEL002948 PE=4 SV=1                                                             |
| CCG022226.1 | 834  | 3    | 58 | 0.15456739 | 2.431151142 | 3.975331698  | Up   | 5.28E-05  | 8.84E-05   | AAEL009244-PA OS=Aedes aegypti GN=AAEL009244 PE=3 SV=1                                                             |

|             |      |     |    |            |             |              |      |           |           |                                                                                       |
|-------------|------|-----|----|------------|-------------|--------------|------|-----------|-----------|---------------------------------------------------------------------------------------|
| CCG012241.1 | 414  | 8   | 58 | 0.83033304 | 4.897536359 | 2.560294199  | Up   | 2.20E-06  | 3.98E-06  | AAEL006570-PA OS=Aedes aegypti GN=AAEL006570 PE=4 SV=1                                |
| CCG007635.1 | 665  | 12  | 58 | 0.77539371 | 3.048992561 | 1.975331698  | Up   | 1.38E-06  | 2.52E-06  | -                                                                                     |
| CCG018032.1 | 2425 | 14  | 58 | 0.24807269 | 0.836115486 | 1.752939277  | Up   | 7.67E-06  | 1.35E-05  | Putative uncharacterized protein OS=Tribolium castaneum GN=TcasGA2_TC004811 PE=4 SV=1 |
| CCG001438.1 | 1409 | 14  | 58 | 0.42695265 | 1.439020619 | 1.752939277  | Up   | 7.67E-06  | 1.35E-05  | AAEL003264-PA OS=Aedes aegypti GN=AAEL003264 PE=4 SV=1                                |
| CCG004575.1 | 1155 | 16  | 58 | 0.59525173 | 1.755480565 | 1.560294199  | Up   | 3.76E-05  | 6.34E-05  | AAEL007864-PA OS=Aedes aegypti GN=AAEL007864 PE=4 SV=1                                |
| CCG000715.1 | 2064 | 16  | 58 | 0.33309872 | 0.982354677 | 1.560294199  | Up   | 3.76E-05  | 6.34E-05  | Starlet OS=Culex quinquefasciatus                                                     |
| CCG025851.1 | 4728 | 100 | 58 | 0.90883533 | 0.428845189 | -1.083561991 | Down | 3.38E-06  | 6.07E-06  | AAEL005045-PA OS=Aedes aegypti GN=AAEL005045 PE=3 SV=1                                |
| CCG017641.1 | 1896 | 118 | 58 | 2.67427673 | 1.069398762 | -1.32234885  | Down | 3.29E-09  | 6.69E-09  | Transporter OS=Aedes aegypti GN=AAEL000298 PE=3 SV=1                                  |
| CCG022791.1 | 1131 | 123 | 58 | 4.67310111 | 1.792732142 | -1.382220306 | Down | 4.08E-10  | 8.51E-10  | AAEL000577-PA OS=Aedes aegypti GN=AAEL000577 PE=4 SV=1                                |
| CCG018921.1 | 1365 | 133 | 58 | 4.18679465 | 1.485406632 | -1.494988237 | Down | 5.23E-12  | 1.19E-11  | AAEL000912-PA OS=Aedes aegypti GN=AAEL000912 PE=4 SV=1                                |
| CCG014904.1 | 498  | 182 | 58 | 15.7037986 | 4.071445889 | -1.947500441 | Down | 1.82E-22  | 7.26E-22  | AAEL013220-PA OS=Aedes aegypti GN=AAEL013220 PE=4 SV=1                                |
| CCG027033.1 | 592  | 188 | 58 | 13.6457941 | 3.424966305 | -1.994294653 | Down | 7.46E-24  | 3.00E-23  | AAEL006341-PA OS=Aedes aegypti GN=AAEL006341 PE=4 SV=1                                |
| CCG012716.1 | 2058 | 225 | 58 | 4.69785728 | 0.985218685 | -2.253486992 | Down | 8.50E-33  | 3.63E-32  | AAEL013496-PA OS=Aedes aegypti GN=PPO8 PE=4 SV=1                                      |
| CCG007640.1 | 471  | 352 | 58 | 32.1132624 | 4.304840876 | -2.89913742  | Down | 7.43E-67  | 3.65E-66  | AGAP005599-PA (Fragment) OS=Anopheles gambiae GN=AGAP005599 PE=4 SV=3                 |
| CCG006358.1 | 879  | 391 | 58 | 19.1139548 | 2.30668948  | -3.050730598 | Down | 5.45E-78  | 2.75E-77  | AAEL008701-PA OS=Aedes aegypti GN=AAEL008701 PE=4 SV=1                                |
| CCG015353.1 | 1353 | 482 | 58 | 15.3077695 | 1.49858097  | -3.352595137 | Down | 9.44E-105 | 5.03E-104 | AAEL011440-PA OS=Aedes aegypti GN=AAEL011440 PE=4 SV=1                                |

|             |      |      |    |            |             |              |      |           |            |                                                                            |
|-------------|------|------|----|------------|-------------|--------------|------|-----------|------------|----------------------------------------------------------------------------|
| CCG011850.1 | 1137 | 895  | 58 | 33.8240215 | 1.783271814 | -4.245449673 | Down | 1.17E-233 | 7.13E-233  | Lipase OS=Aedes aegypti<br>GN=AAEL015326 PE=3 SV=1                         |
| CCG013958.1 | 2970 | 2804 | 58 | 40.5680592 | 0.682686886 | -5.892976435 | Down | 0         | 0          | AAEL001953-PA OS=Aedes<br>aegypti GN=AAEL001953 PE=4<br>SV=1               |
| CCG016691.1 | 1269 | 4590 | 58 | 155.422444 | 1.597777819 | -6.603984239 | Down | 0         | 0          | AGAP009759-PA OS=Anopheles<br>gambiae GN=AgaP_AGAP009759<br>PE=4 SV=4      |
| CCG021211.1 | 288  | 0    | 59 | 0.001      | 7.161591422 | 12.8060645   | Up   | 8.88E-16  | 3.24E-15   | AAEL004817-PA OS=Aedes<br>aegypti GN=AAEL004817 PE=4<br>SV=1               |
| CCG004836.1 | 774  | 0    | 59 | 0.001      | 2.664778204 | 11.37979974  | Up   | 8.88E-16  | 3.24E-15   | AAEL010110-PA OS=Aedes<br>aegypti GN=AAEL010110 PE=4<br>SV=1               |
| CCG019747.1 | 1059 | 0    | 59 | 0.001      | 1.947628262 | 10.92750263  | Up   | 8.88E-16  | 3.24E-15   | Uncharacterized protein<br>OS=Anopheles darlingi<br>GN=AND_02187 PE=4 SV=1 |
| CCG007299.1 | 1080 | 2    | 59 | 0.07957358 | 1.909757713 | 4.584956253  | Up   | 9.36E-05  | 0.00015388 | AAEL004561-PA OS=Aedes<br>aegypti GN=AAEL004561 PE=4<br>SV=1               |
| CCG003987.1 | 861  | 6    | 59 | 0.29944066 | 2.395514901 | 2.999993752  | Up   | 8.38E-06  | 1.47E-05   | AAEL004449-PA OS=Aedes<br>aegypti GN=AAEL004449 PE=4<br>SV=1               |
| CCG005930.1 | 801  | 6    | 59 | 0.32187067 | 2.574954219 | 2.999993752  | Up   | 8.38E-06  | 1.47E-05   | AAEL007204-PA OS=Aedes<br>aegypti GN=AAEL007204 PE=4<br>SV=1               |
| CCG009535.1 | 681  | 6    | 59 | 0.37858797 | 3.028690645 | 2.999993752  | Up   | 8.38E-06  | 1.47E-05   | AAEL006501-PA OS=Aedes<br>aegypti GN=AAEL006501 PE=4<br>SV=1               |
| CCG004461.1 | 1158 | 7    | 59 | 0.25974796 | 1.781121183 | 2.777601331  | Up   | 4.31E-06  | 7.69E-06   | AAEL014577-PA OS=Aedes<br>aegypti GN=AAEL014577 PE=4<br>SV=1               |
| CCG004167.1 | 589  | 7    | 59 | 0.51067596 | 3.501762869 | 2.777601331  | Up   | 4.31E-06  | 7.69E-06   | AAEL012468-PA OS=Aedes<br>aegypti GN=AAEL012468 PE=4<br>SV=1               |
| CCG012102.1 | 1257 | 7    | 59 | 0.23929049 | 1.640841949 | 2.777601331  | Up   | 4.31E-06  | 7.69E-06   | Uncharacterized protein<br>OS=Anopheles darlingi<br>GN=AND_20812 PE=4 SV=1 |
| CCG019814.1 | 789  | 10   | 59 | 0.54461007 | 2.614117021 | 2.263028158  | Up   | 6.43E-07  | 1.19E-06   | -                                                                          |
| CCG000485.1 | 3156 | 11   | 59 | 0.14976777 | 0.653529255 | 2.125524635  | Up   | 5.64E-07  | 1.05E-06   | AGAP002803-PA OS=Anopheles<br>gambiae GN=AgaP_AGAP002803<br>PE=4 SV=2      |

|             |      |     |    |            |             |              |      |           |            |                                                                                                   |
|-------------|------|-----|----|------------|-------------|--------------|------|-----------|------------|---------------------------------------------------------------------------------------------------|
| CCG000705.1 | 216  | 11  | 59 | 2.18827352 | 9.548788563 | 2.125524635  | Up   | 5.64E-07  | 1.05E-06   | Putative uncharacterized protein<br>OS=Culex quinquefasciatus<br>GN=CpipJ_CPIJ007491 PE=4<br>SV=1 |
| CCG026464.1 | 6514 | 13  | 59 | 0.08575477 | 0.316631613 | 1.884516535  | Up   | 2.18E-06  | 3.97E-06   | Putative uncharacterized protein<br>OS=Drosophila simulans GN=pol<br>PE=4 SV=1                    |
| CCG009603.1 | 2195 | 17  | 59 | 0.33279521 | 0.939652998 | 1.497493412  | Up   | 5.44E-05  | 9.08E-05   | AAEL005592-PA OS=Aedes<br>aegypti GN=AAEL005592 PE=4<br>SV=1                                      |
| CCG003012.1 | 363  | 17  | 59 | 2.01235672 | 5.681923773 | 1.497493412  | Up   | 5.44E-05  | 9.08E-05   | Putative uncharacterized protein<br>OS=Culex quinquefasciatus<br>GN=CpipJ_CPIJ002500 PE=4<br>SV=1 |
| CCG014693.3 | 2985 | 19  | 59 | 0.2735092  | 0.690967615 | 1.33702874   | Up   | 0.0002092 | 0.00033598 | AAEL009780-PA OS=Aedes<br>aegypti GN=AAEL009780 PE=3<br>SV=1                                      |
| CCG002761.1 | 865  | 138 | 59 | 6.85528714 | 2.384437375 | -1.523568204 | Down | 1.02E-12  | 2.51E-12   | AAEL014552-PA OS=Aedes<br>aegypti GN=AAEL014552 PE=4<br>SV=1                                      |
| CCG015372.2 | 1390 | 138 | 59 | 4.26605998 | 1.483840525 | -1.523568204 | Down | 1.02E-12  | 2.51E-12   | AAEL006581-PA OS=Aedes<br>aegypti GN=AAEL006581 PE=4<br>SV=1                                      |
| CCG014200.1 | 708  | 145 | 59 | 8.80029876 | 2.913189731 | -1.594952837 | Down | 4.08E-14  | 1.40E-13   | Putative uncharacterized protein<br>OS=Culex quinquefasciatus<br>GN=CpipJ_CPIJ003070 PE=4<br>SV=1 |
| CCG018890.1 | 921  | 147 | 59 | 6.85836155 | 2.239455298 | -1.614716092 | Down | 1.60E-14  | 5.64E-14   | AAEL011416-PA OS=Aedes<br>aegypti GN=AAEL011416 PE=4<br>SV=1                                      |
| CCG007207.1 | 1587 | 154 | 59 | 4.1697159  | 1.29964608  | -1.681830288 | Down | 5.69E-16  | 2.08E-15   | AAEL009774-PA OS=Aedes<br>aegypti GN=AAEL009774 PE=3<br>SV=1                                      |
| CCG018196.1 | 1611 | 251 | 59 | 6.69485002 | 1.2802845   | -2.386587301 | Down | 6.06E-39  | 2.69E-38   | AAEL002666-PA OS=Aedes<br>aegypti GN=AAEL002666 PE=4<br>SV=1                                      |
| CCG015445.1 | 2613 | 257 | 59 | 4.22626169 | 0.789337286 | -2.420668296 | Down | 1.71E-40  | 7.64E-40   | AAEL002754-PA OS=Aedes<br>aegypti GN=AAEL002754 PE=4<br>SV=1                                      |
| CCG010415.1 | 1473 | 374 | 59 | 10.9101702 | 1.400229687 | -2.961938207 | Down | 1.69E-72  | 8.43E-72   | AAEL004923-PA OS=Aedes<br>aegypti GN=AAEL004923 PE=4<br>SV=1                                      |
| CCG022345.1 | 1131 | 377 | 59 | 14.3232449 | 1.823641317 | -2.97346446  | Down | 2.36E-73  | 1.18E-72   | AAEL001951-PA OS=Aedes<br>aegypti GN=AAEL001951 PE=2<br>SV=1                                      |
| CCG017574.1 | 603  | 640 | 59 | 45.6063518 | 3.420461575 | -3.736971842 | Down | 3.53E-152 | 2.01E-151  | AAEL005392-PA OS=Aedes<br>aegypti GN=AAEL005392 PE=4<br>SV=1                                      |

|             |      |     |    |            |             |              |      |           |            |                                                                                           |
|-------------|------|-----|----|------------|-------------|--------------|------|-----------|------------|-------------------------------------------------------------------------------------------|
| CCG013937.1 | 1293 | 3   | 60 | 0.09969776 | 1.622193818 | 4.024241299  | Up   | 5.28E-05  | 8.86E-05   | AAEL002128-PA OS=Aedes aegypti GN=AAEL002128 PE=3 SV=1                                    |
| CCG022132.1 | 1686 | 7   | 60 | 0.17840341 | 1.244066789 | 2.801848877  | Up   | 4.31E-06  | 7.69E-06   | Alkaline phosphatase OS=Aedes aegypti GN=AAEL003309 PE=3 SV=1                             |
| CCG027600.1 | 1341 | 8   | 60 | 0.25634443 | 1.564128715 | 2.609203799  | Up   | 2.19E-06  | 3.96E-06   | AAEL006871-PA OS=Aedes aegypti GN=AAEL006871 PE=4 SV=1                                    |
| CCG006002.1 | 420  | 10  | 60 | 1.02308892 | 4.994039539 | 2.287275705  | Up   | 6.07E-07  | 1.13E-06   | Insulin-like peptide 2 OS=Aedes aegypti PE=2 SV=2                                         |
| CCG007241.1 | 729  | 12  | 60 | 0.70732073 | 2.877224426 | 2.024241299  | Up   | 6.69E-07  | 1.24E-06   | AAEL014795-PA OS=Aedes aegypti GN=AAEL014795 PE=4 SV=1                                    |
| CCG011341.1 | 459  | 14  | 60 | 1.31062371 | 4.569709382 | 1.801848877  | Up   | 3.51E-06  | 6.29E-06   | AAEL010292-PA (Fragment) OS=Aedes aegypti GN=AAEL010292 PE=4 SV=1                         |
| CCG023223.1 | 589  | 15  | 60 | 1.09430564 | 3.561114782 | 1.702313204  | Up   | 8.13E-06  | 1.44E-05   | -                                                                                         |
| CCG016120.1 | 1135 | 16  | 60 | 0.60574075 | 1.848014631 | 1.609203799  | Up   | 1.80E-05  | 3.10E-05   | Putative uncharacterized protein OS=Culex quinquefasciatus GN=CpipJ_CPIJ000390 PE=4 SV=1  |
| CCG017734.1 | 2172 | 19  | 60 | 0.37588626 | 0.965698253 | 1.361276286  | Up   | 0.00015   | 0.00024252 | Putative uncharacterized protein (Fragment) OS=Solenopsis invicta GN=SINV_11683 PE=4 SV=1 |
| CCG028489.1 | 1376 | 21  | 60 | 0.6557881  | 1.524343464 | 1.216886377  | Up   | 0.0005067 | 0.00079557 | -                                                                                         |
| CCG006411.3 | 2331 | 104 | 60 | 1.9171396  | 0.899826944 | -1.091235919 | Down | 1.88E-06  | 3.43E-06   | AAEL002732-PA (Fragment) OS=Aedes aegypti GN=AAEL002732 PE=4 SV=1                         |
| CCG020480.1 | 642  | 122 | 60 | 8.1655882  | 3.26712867  | -1.321533538 | Down | 1.82E-09  | 3.71E-09   | AAEL011962-PA OS=Aedes aegypti GN=AAEL011962 PE=4 SV=1                                    |
| CCG019799.1 | 1377 | 135 | 60 | 4.21271908 | 1.523236461 | -1.467611798 | Down | 7.12E-12  | 1.60E-11   | AAEL008262-PA (Fragment) OS=Aedes aegypti GN=AAEL008262 PE=4 SV=1                         |
| CCG027704.2 | 762  | 136 | 60 | 7.66913899 | 2.752620218 | -1.478259042 | Down | 4.57E-12  | 1.05E-11   | AAEL006641-PA OS=Aedes aegypti GN=AAEL006641 PE=4 SV=1                                    |
| CCG008075.1 | 489  | 150 | 60 | 13.1809002 | 4.289359113 | -1.619614891 | Down | 7.56E-15  | 2.71E-14   | AAEL004665-PA OS=Aedes aegypti GN=AAEL004665 PE=4 SV=1                                    |



|             |       |      |    |            |             |              |      |          |            |                                                                                          |
|-------------|-------|------|----|------------|-------------|--------------|------|----------|------------|------------------------------------------------------------------------------------------|
| CCG000173.1 | 591   | 152  | 60 | 11.0514377 | 3.549063632 | -1.638723714 | Down | 2.94E-15 | 1.06E-14   | AAEL013424-PA OS=Aedes aegypti GN=AAEL013424 PE=4 SV=1                                   |
| CCG007529.1 | 2213  | 153  | 60 | 2.97079503 | 0.947806871 | -1.648184043 | Down | 1.82E-15 | 6.62E-15   | Gap-Pol polyprotein OS=Schistosoma japonicum PE=4 SV=1                                   |
| CCG017424.1 | 432   | 158  | 60 | 15.7157826 | 4.855316218 | -1.694576949 | Down | 1.65E-16 | 6.20E-16   | Putative uncharacterized protein OS=Culex quinquefasciatus GN=CpipJ_CPIJ016740 PE=4 SV=1 |
| CCG009208.1 | 1902  | 160  | 60 | 3.61469902 | 1.102784756 | -1.712724295 | Down | 6.23E-17 | 2.35E-16   | AAEL002576-PA OS=Aedes aegypti GN=AAEL002576 PE=3 SV=1                                   |
| CCG017725.1 | 660   | 178  | 60 | 11.5888072 | 3.178025161 | -1.866529632 | Down | 7.39E-21 | 2.91E-20   | AAEL006267-PA OS=Aedes aegypti GN=AAEL006267 PE=3 SV=1                                   |
| CCG001026.1 | 414   | 191  | 60 | 19.8242012 | 5.066416924 | -1.968225029 | Down | 8.16E-24 | 3.28E-23   | AAEL014303-PA OS=Aedes aegypti GN=AAEL014303 PE=4 SV=1                                   |
| CCG021317.1 | 12798 | 1499 | 60 | 5.03294516 | 0.163892531 | -4.940580869 | Down | 0        | 0          | AAEL008036-PA OS=Aedes aegypti GN=AAEL008036 PE=4 SV=1                                   |
| CCG008382.1 | 756   | 0    | 61 | 0.001      | 2.820707517 | 11.46184136  | Up   | 4.44E-16 | 1.66E-15   | AAEL001674-PA OS=Aedes aegypti GN=AAEL001674 PE=3 SV=1                                   |
| CCG021075.1 | 453   | 1    | 61 | 0.09485593 | 4.707405923 | 5.633050541  | Up   | 0.000587 | 0.00091603 | -                                                                                        |
| CCG007143.1 | 1635  | 2    | 61 | 0.05256237 | 1.304253751 | 4.633050541  | Up   | 9.36E-05 | 0.00015363 | Putative uncharacterized protein OS=Culex quinquefasciatus GN=CpipJ_CPIJ018804 PE=4 SV=1 |
| CCG002930.1 | 204   | 2    | 61 | 0.42127191 | 10.45321021 | 4.633050541  | Up   | 9.36E-05 | 0.00015389 | AAEL003533-PA OS=Aedes aegypti GN=AAEL003533 PE=4 SV=1                                   |
| CCG001060.1 | 585   | 4    | 61 | 0.29381015 | 3.645222022 | 3.633050541  | Up   | 2.95E-05 | 5.03E-05   | -                                                                                        |
| CCG009488.1 | 593   | 5    | 61 | 0.36230805 | 3.596045334 | 3.311122446  | Up   | 1.59E-05 | 2.76E-05   | -                                                                                        |
| CCG017195.1 | 546   | 6    | 61 | 0.47219489 | 3.905595024 | 3.048088041  | Up   | 8.38E-06 | 1.47E-05   | AAEL002330-PA OS=Aedes aegypti GN=AAEL002330 PE=4 SV=1                                   |
| CCG005870.1 | 862   | 7    | 61 | 0.34894216 | 2.473845572 | 2.825695619  | Up   | 4.31E-06 | 7.69E-06   | -                                                                                        |
| CCG012718.1 | 2061  | 8    | 61 | 0.16679179 | 1.034670006 | 2.633050541  | Up   | 2.19E-06 | 3.96E-06   | AAEL013492-PA OS=Aedes aegypti GN=PPO5 PE=4 SV=1                                         |
| CCG001451.1 | 564   | 15   | 61 | 1.14281209 | 3.780948374 | 1.726159946  | Up   | 5.54E-06 | 9.83E-06   | AAEL008356-PA OS=Aedes aegypti GN=AAEL008356 PE=4 SV=1                                   |
| CCG001669.1 | 1362  | 15   | 61 | 0.47323496 | 1.565679062 | 1.726159946  | Up   | 5.54E-06 | 9.83E-06   | AAEL005519-PA OS=Aedes aegypti GN=AAEL005519 PE=4 SV=1                                   |

|             |      |      |    |            |             |              |      |           |            |                                                                                          |
|-------------|------|------|----|------------|-------------|--------------|------|-----------|------------|------------------------------------------------------------------------------------------|
| CCG013346.1 | 562  | 18   | 61 | 1.37625485 | 3.794403707 | 1.46312554   | Up   | 5.45E-05  | 9.09E-05   | AAEL007574-PA OS=Aedes aegypti GN=AAEL007574 PE=4 SV=1                                   |
| CCG017664.1 | 1569 | 21   | 61 | 0.57512073 | 1.359117198 | 1.240733119  | Up   | 0.0003704 | 0.00058625 | AAEL004191-PA OS=Aedes aegypti GN=AAEL004191 PE=4 SV=1                                   |
| CCG008543.1 | 1606 | 114  | 61 | 3.05015551 | 1.327805033 | -1.199839473 | Down | 7.18E-08  | 1.38E-07   | AAEL000486-PA OS=Aedes aegypti GN=AAEL006486 PE=4 SV=1                                   |
| CCG008826.1 | 2007 | 176  | 61 | 3.76814813 | 1.062508661 | -1.826381077 | Down | 4.47E-20  | 1.75E-19   | AAEL012949-PA (Fragment) OS=Aedes aegypti GN=AAEL012949 PE=4 SV=1                        |
| CCG015084.1 | 1035 | 177  | 61 | 7.34844737 | 2.060342882 | -1.834555009 | Down | 2.69E-20  | 1.05E-19   | AAEL007497-PA OS=Aedes aegypti GN=AAEL007497 PE=4 SV=1                                   |
| CCG023271.1 | 1526 | 178  | 61 | 5.01219709 | 1.397414733 | -1.84268289  | Down | 1.61E-20  | 6.33E-20   | AAEL000438-PA OS=Aedes aegypti GN=AAEL000438 PE=4 SV=1                                   |
| CCG016996.1 | 633  | 185  | 61 | 12.5582953 | 3.368807082 | -1.898330919 | Down | 4.36E-22  | 1.73E-21   | Uncharacterized protein OS=Anopheles darlingi GN=AND_05893 PE=4 SV=1                     |
| CCG000766.1 | 240  | 195  | 61 | 34.9129094 | 8.88522868  | -1.974279772 | Down | 2.25E-24  | 9.07E-24   | AAEL014137-PA OS=Aedes aegypti GN=CLIPB25 PE=3 SV=1                                      |
| CCG014951.1 | 1761 | 219  | 61 | 5.34376597 | 1.210934062 | -2.141736518 | Down | 4.55E-30  | 1.92E-29   | AAEL009856-PA OS=Aedes aegypti GN=AAEL009856 PE=4 SV=1                                   |
| CCG010864.1 | 1132 | 318  | 61 | 12.0710032 | 1.883794066 | -2.679832414 | Down | 9.88E-56  | 4.70E-55   | AAEL012101-PA OS=Aedes aegypti GN=AAEL012101 PE=3 SV=1                                   |
| CCG012590.1 | 873  | 332  | 61 | 16.3412966 | 2.442674551 | -2.74198889  | Down | 1.44E-59  | 6.94E-59   | AAEL003656-PA OS=Aedes aegypti GN=AAEL003656 PE=4 SV=1                                   |
| CCG011257.1 | 1287 | 3634 | 61 | 121.330237 | 1.656919101 | -6.194292163 | Down | 0         | 0          | AAEL003425-PB (Fragment) OS=Aedes aegypti GN=AAEL003425 PE=4 SV=1                        |
| CCG027173.2 | 1340 | 4    | 62 | 0.12826786 | 1.617472507 | 3.656509514  | Up   | 2.95E-05  | 5.03E-05   | Putative uncharacterized protein OS=Tribolium castaneum GN=TcasGA2_TC001807 PE=4 SV=1    |
| CCG020150.1 | 1935 | 4    | 62 | 0.08882632 | 1.12011016  | 3.656509514  | Up   | 2.95E-05  | 5.04E-05   | Putative uncharacterized protein OS=Culex quinquefasciatus GN=CpipJ_CPIJ015738 PE=4 SV=1 |
| CCG004769.1 | 297  | 4    | 62 | 0.57871696 | 7.297687407 | 3.656509514  | Up   | 2.95E-05  | 5.04E-05   | -                                                                                        |

|             |      |    |    |            |             |             |    |          |          |                                                                                                              |
|-------------|------|----|----|------------|-------------|-------------|----|----------|----------|--------------------------------------------------------------------------------------------------------------|
| CCG023961.1 | 914  | 6  | 62 | 0.28207703 | 2.37134919  | 3.071547013 | Up | 8.38E-06 | 1.47E-05 | -                                                                                                            |
| CCG027325.1 | 768  | 6  | 62 | 0.33570105 | 2.822152552 | 3.071547013 | Up | 8.38E-06 | 1.47E-05 | -                                                                                                            |
| CCG000891.1 | 777  | 8  | 62 | 0.44241683 | 2.789463526 | 2.656509514 | Up | 2.19E-06 | 3.96E-06 | Arsin OS=Culex quinquefasciatus<br>GN=CpipJ_CPIJ008260 PE=4<br>SV=1                                          |
| CCG003620.1 | 450  | 10 | 62 | 0.95488299 | 4.816473689 | 2.334581419 | Up | 5.69E-07 | 1.06E-06 | -                                                                                                            |
| CCG026422.2 | 1011 | 13 | 62 | 0.55252873 | 2.143831019 | 1.956069796 | Up | 6.83E-07 | 1.27E-06 | AAEL006948-PA (Fragment)<br>OS=Aedes aegypti<br>GN=AAEL006948 PE=4 SV=1                                      |
| CCG021735.1 | 1680 | 13 | 62 | 0.3325039  | 1.290126881 | 1.956069796 | Up | 6.83E-07 | 1.27E-06 | -                                                                                                            |
| CCG024836.1 | 1179 | 14 | 62 | 0.51024282 | 1.838348736 | 1.849154592 | Up | 1.60E-06 | 2.92E-06 | AAEL014577-PA OS=Aedes<br>aegypti GN=AAEL014577 PE=4<br>SV=1                                                 |
| CCG009165.1 | 1176 | 14 | 62 | 0.51154446 | 1.843038401 | 1.849154592 | Up | 1.60E-06 | 2.92E-06 | S-methyl-5-uraciladenosine<br>phosphorylase OS=Culex<br>quinquefasciatus<br>GN=CpipJ_CPIJ002278 PE=3<br>SV=1 |
| CCG009575.1 | 1210 | 14 | 62 | 0.49717048 | 1.791250545 | 1.849154592 | Up | 1.60E-06 | 2.92E-06 | Putative uncharacterized protein<br>OS=Tribolium castaneum<br>GN=TcasGA2_TC002325 PE=4<br>SV=1               |
| CCG009908.1 | 1341 | 14 | 62 | 0.44860275 | 1.616266338 | 1.849154592 | Up | 1.60E-06 | 2.92E-06 | AAEL009050-PA OS=Aedes<br>aegypti GN=AAEL009050 PE=4<br>SV=1                                                 |
| CCG018330.1 | 669  | 15 | 62 | 0.96344696 | 3.239780508 | 1.749618919 | Up | 3.76E-06 | 6.74E-06 | AAEL002806-PA OS=Aedes<br>aegypti GN=AAEL002806 PE=4<br>SV=1                                                 |
| CCG014474.1 | 1360 | 15 | 62 | 0.4739309  | 1.593686147 | 1.749618919 | Up | 3.76E-06 | 6.74E-06 | -                                                                                                            |
| CCG012895.1 | 659  | 16 | 62 | 1.04327125 | 3.288942579 | 1.656509514 | Up | 8.53E-06 | 1.50E-05 | Predicted protein OS=Ajellomyces<br>capsulata (strain NAm1 / WU24)<br>GN=HCAG_05350 PE=4 SV=1                |
| CCG025904.1 | 270  | 16 | 62 | 2.54635464 | 8.027456148 | 1.656509514 | Up | 8.53E-06 | 1.50E-05 | AAEL004552-PA OS=Aedes<br>aegypti GN=AAEL004552 PE=4<br>SV=1                                                 |
| CCG028149.1 | 529  | 17 | 62 | 1.38087994 | 4.097189338 | 1.569046673 | Up | 1.85E-05 | 3.18E-05 | AAEL004617-PA OS=Aedes<br>aegypti GN=AAEL004617 PE=4<br>SV=1                                                 |
| CCG025897.1 | 1239 | 18 | 62 | 0.62425765 | 1.749324584 | 1.486584513 | Up | 3.83E-05 | 6.47E-05 | Argininosuccinate synthase<br>OS=Culex quinquefasciatus<br>GN=CpipJ_CPIJ012882 PE=3<br>SV=1                  |

|             |       |     |    |            |             |              |      |          |            |                                                                                                   |
|-------------|-------|-----|----|------------|-------------|--------------|------|----------|------------|---------------------------------------------------------------------------------------------------|
| CCG027089.2 | 5015  | 19  | 62 | 0.1627966  | 0.432186074 | 1.408582001  | Up   | 7.62E-05 | 0.00012619 | Polyprotein OS=Antheraea mylitta<br>PE=4 SV=1                                                     |
| CCG011652.1 | 1196  | 20  | 62 | 0.71855743 | 1.812218361 | 1.334581419  | Up   | 0.000146 | 0.00023647 | Pol-like protein OS=Aedes aegypti<br>PE=4 SV=1                                                    |
| CCG025238.1 | 1200  | 105 | 62 | 3.75985178 | 1.806177633 | -1.057736003 | Down | 3.04E-06 | 5.47E-06   | Putative uncharacterized protein<br>OS=Culex quinquefasciatus<br>GN=CpipJ_CPIJ011883 PE=4<br>SV=1 |
| CCG006035.2 | 10573 | 107 | 62 | 0.43485875 | 0.204995097 | -1.084957472 | Down | 1.50E-06 | 2.74E-06   | AGAP013037-PA OS=Anopheles<br>gambiae GN=AgaP_AGAP013037<br>PE=4 SV=1                             |
| CCG014345.2 | 621   | 113 | 62 | 7.81896942 | 3.490198325 | -1.163669448 | Down | 1.67E-07 | 3.16E-07   | AAEL006947-PA (Fragment)<br>OS=Aedes aegypti GN=GPRTAK2<br>PE=3 SV=2                              |
| CCG026266.1 | 858   | 128 | 62 | 6.4104033  | 2.526122564 | -1.343490486 | Down | 4.40E-10 | 9.17E-10   | AAEL010102-PA OS=Aedes<br>aegypti GN=AAEL010102 PE=4<br>SV=1                                      |
| CCG011863.1 | 1290  | 129 | 62 | 4.29697346 | 1.68016524  | -1.354717741 | Down | 2.90E-10 | 6.10E-10   | AAEL014370-PA (Fragment)<br>OS=Aedes aegypti<br>GN=AAEL014370 PE=4 SV=1                           |
| CCG021738.1 | 3384  | 137 | 62 | 1.73961396 | 0.640488522 | -1.441522569 | Down | 9.55E-12 | 2.13E-11   | AAEL009813-PA OS=Aedes<br>aegypti GN=AAEL009813 PE=4<br>SV=1                                      |
| CCG008603.1 | 1566  | 193 | 62 | 5.29575912 | 1.384044163 | -1.935947523 | Down | 1.49E-23 | 5.98E-23   | AAEL001241-PA OS=Aedes<br>aegypti GN=AAEL001241 PE=4<br>SV=1                                      |
| CCG020911.1 | 1863  | 238 | 62 | 5.48942396 | 1.163399442 | -2.238308249 | Down | 2.54E-34 | 1.10E-33   | AAEL004002-PA OS=Aedes<br>aegypti GN=AAEL004002 PE=3<br>SV=1                                      |
| CCG027689.1 | 1332  | 243 | 62 | 7.83907321 | 1.627187057 | -2.268302989 | Down | 1.44E-35 | 6.25E-35   | AAEL001722-PA OS=Aedes<br>aegypti GN=AAEL001722 PE=4<br>SV=2                                      |
| CCG024889.1 | 1515  | 250 | 62 | 7.09071528 | 1.430635749 | -2.30927477  | Down | 2.49E-37 | 1.09E-36   | AAEL005983-PA OS=Aedes<br>aegypti GN=AAEL005983 PE=4<br>SV=1                                      |
| CCG001210.1 | 875   | 306 | 62 | 15.02713   | 2.477043611 | -2.600878328 | Down | 5.84E-52 | 2.75E-51   | -                                                                                                 |
| CCG001796.1 | 363   | 0   | 63 | 0.001      | 6.067138944 | 12.56680064  | Up   | 4.44E-16 | 1.65E-15   | -                                                                                                 |
| CCG007624.1 | 642   | 2   | 63 | 0.1338621  | 3.430485104 | 4.679593127  | Up   | 9.36E-05 | 0.00015383 | AAEL010375-PA OS=Aedes<br>aegypti GN=AAEL010375 PE=4<br>SV=1                                      |
| CCG005589.1 | 1556  | 4   | 63 | 0.11046204 | 1.415405808 | 3.679593127  | Up   | 2.95E-05 | 5.03E-05   | AAEL014132-PA OS=Aedes<br>aegypti GN=AAEL014132 PE=4<br>SV=1                                      |

|             |      |     |    |            |             |              |      |           |            |                                                                                                   |
|-------------|------|-----|----|------------|-------------|--------------|------|-----------|------------|---------------------------------------------------------------------------------------------------|
| CCG005374.1 | 648  | 6   | 63 | 0.39786791 | 3.398721353 | 3.094630627  | Up   | 8.38E-06  | 1.47E-05   | AAEL011990-PA (Fragment)<br>OS=Aedes aegypti<br>GN=AAEL011990 PE=4 SV=1                           |
| CCG001601.1 | 1251 | 10  | 63 | 0.34348309 | 1.760488758 | 2.357665032  | Up   | 5.59E-07  | 1.04E-06   | AAEL011805-PA (Fragment)<br>OS=Aedes aegypti<br>GN=AAEL011805 PE=4 SV=1                           |
| CCG001956.1 | 246  | 12  | 63 | 2.09608462 | 8.952729417 | 2.094630627  | Up   | 2.81E-07  | 5.28E-07   | AAEL007576-PA OS=Aedes<br>aegypti GN=AAEL007576 PE=4<br>SV=1                                      |
| CCG013893.1 | 1318 | 13  | 63 | 0.42382895 | 1.67099502  | 1.979153409  | Up   | 4.73E-07  | 8.83E-07   | Putative uncharacterized protein<br>OS=Culex quinquefasciatus<br>GN=CpipJ_CPIJ001645 PE=4<br>SV=1 |
| CCG011982.1 | 1295 | 14  | 63 | 0.46453767 | 1.700672924 | 1.872238205  | Up   | 1.08E-06  | 1.99E-06   | AAEL004639-PA OS=Aedes<br>aegypti GN=AAEL004639 PE=4<br>SV=1                                      |
| CCG000401.2 | 1425 | 15  | 63 | 0.452313   | 1.545523815 | 1.772702532  | Up   | 2.55E-06  | 4.60E-06   | AAEL004576-PA OS=Aedes<br>aegypti GN=AAEL004576 PE=4<br>SV=1                                      |
| CCG002159.1 | 623  | 18  | 63 | 1.24150116 | 3.53510664  | 1.509668126  | Up   | 2.69E-05  | 4.60E-05   | AAEL011939-PA OS=Aedes<br>aegypti GN=AAEL011939 PE=4<br>SV=1                                      |
| CCG003386.1 | 960  | 19  | 63 | 0.85044266 | 2.294136913 | 1.431665614  | Up   | 5.41E-05  | 9.03E-05   | Annexin OS=Aedes aegypti<br>GN=AAEL005417 PE=3 SV=1                                               |
| CCG016939.1 | 435  | 20  | 63 | 1.97561998 | 5.062922843 | 1.357665032  | Up   | 0.0001048 | 0.00017082 | AAEL002191-PA OS=Aedes<br>aegypti GN=AAEL002191 PE=4<br>SV=1                                      |
| CCG010728.1 | 885  | 21  | 63 | 1.01962082 | 2.488555296 | 1.287275705  | Up   | 0.0001957 | 0.00031482 | AAEL012641-PA OS=Aedes<br>aegypti GN=AAEL012641 PE=4<br>SV=1                                      |
| CCG021376.1 | 1668 | 23  | 63 | 0.59250833 | 1.320366569 | 1.156031171  | Up   | 0.0006178 | 0.00096051 | AAEL010649-PA OS=Aedes<br>aegypti GN=AAEL010649 PE=4<br>SV=1                                      |
| CCG018400.1 | 931  | 23  | 63 | 1.06155091 | 2.365597676 | 1.156031171  | Up   | 0.0006178 | 0.00096045 | -                                                                                                 |
| CCG010230.1 | 1610 | 119 | 63 | 3.17602386 | 1.367932569 | -1.215224636 | Down | 2.70E-08  | 5.30E-08   | AAEL000522-PA OS=Aedes<br>aegypti GN=AAEL000522 PE=4<br>SV=1                                      |
| CCG000461.1 | 267  | 137 | 63 | 22.048141  | 8.24858216  | -1.418438956 | Down | 1.70E-11  | 3.73E-11   | AAEL011100-PA OS=Aedes<br>aegypti GN=AAEL011100 PE=4<br>SV=1                                      |
| CCG010145.1 | 1926 | 140 | 63 | 3.12344904 | 1.143495035 | -1.44968989  | Down | 4.61E-12  | 1.05E-11   | AAEL011030-PA OS=Aedes<br>aegypti GN=AAEL011030 PE=4<br>SV=1                                      |
| CCG009795.1 | 766  | 156 | 63 | 8.75101645 | 2.875158533 | -1.605809092 | Down | 3.28E-15  | 1.19E-14   | -                                                                                                 |
| CCG007325.1 | 504  | 203 | 63 | 17.3072542 | 4.369784597 | -1.98574279  | Down | 1.70E-25  | 6.95E-25   | AAEL009620-PA OS=Aedes<br>aegypti GN=AAEL009620 PE=4<br>SV=1                                      |

|             |      |     |    |            |             |              |      |           |            |                                                                                          |
|-------------|------|-----|----|------------|-------------|--------------|------|-----------|------------|------------------------------------------------------------------------------------------|
| CCG018412.1 | 1171 | 213 | 63 | 7.81601492 | 1.880761261 | -2.055116493 | Down | 7.67E-28  | 3.18E-27   | AAEL004509-PA OS=Aedes aegypti GN=AAEL004509 PE=4 SV=1                                   |
| CCG006155.1 | 642  | 217 | 63 | 14.524038  | 3.430485104 | -2.081958105 | Down | 8.58E-29  | 3.59E-28   | AAEL014966-PA OS=Aedes aegypti GN=AAEL014966 PE=4 SV=1                                   |
| CCG008460.1 | 1641 | 223 | 63 | 5.83927533 | 1.342091064 | -2.121306773 | Down | 3.12E-30  | 1.31E-29   | AAEL001936-PA OS=Aedes aegypti GN=AAEL001936 PE=4 SV=1                                   |
| CCG013755.1 | 3517 | 945 | 63 | 11.545749  | 0.626207403 | -4.204577392 | Down | 6.07E-245 | 3.73E-244  | AAEL011196-PA OS=Aedes aegypti GN=AAEL011196 PE=4 SV=1                                   |
| CCG014538.1 | 846  | 1   | 64 | 0.05079165 | 2.64459777  | 5.702313204  | Up   | 0.000587  | 0.00091569 | AAEL006359-PA OS=Aedes aegypti GN=AAEL006359 PE=4 SV=1                                   |
| CCG009804.1 | 873  | 1   | 64 | 0.04922077 | 2.562806086 | 5.702313204  | Up   | 0.000587  | 0.000917   | AAEL005972-PA OS=Aedes aegypti GN=AAEL005972 PE=4 SV=1                                   |
| CCG017412.1 | 878  | 3   | 64 | 0.14682142 | 2.548211519 | 4.117350703  | Up   | 5.28E-05  | 8.84E-05   | -                                                                                        |
| CCG020857.1 | 1872 | 3   | 64 | 0.06886175 | 1.195154761 | 4.117350703  | Up   | 5.28E-05  | 8.85E-05   | AAEL013428-PA OS=Aedes aegypti GN=AAEL013428 PE=4 SV=1                                   |
| CCG002474.1 | 1107 | 4   | 64 | 0.15526553 | 2.021074719 | 3.702313204  | Up   | 2.95E-05  | 5.04E-05   | AAEL009769-PA OS=Aedes aegypti GN=AAEL009769 PE=4 SV=1                                   |
| CCG000897.1 | 348  | 5   | 64 | 0.61738124 | 6.429108372 | 3.380385109  | Up   | 1.59E-05  | 2.76E-05   | Ccicbpin A OS=Culex quinquefasciatus GN=CpipJ_CPIJ010699 PE=4 SV=1                       |
| CCG016632.1 | 1193 | 5   | 64 | 0.18009109 | 1.875381151 | 3.380385109  | Up   | 1.59E-05  | 2.76E-05   | AAEL003811-PA OS=Aedes aegypti GN=AAEL003811 PE=4 SV=1                                   |
| CCG020417.1 | 681  | 6   | 64 | 0.37858797 | 3.285359344 | 3.117350703  | Up   | 8.38E-06  | 1.47E-05   | AAEL004465-PA OS=Aedes aegypti GN=AAEL004465 PE=3 SV=1                                   |
| CCG004364.1 | 1107 | 11  | 64 | 0.4269802  | 2.021074719 | 2.242881585  | Up   | 3.00E-07  | 5.64E-07   | AAEL008798-PA OS=Aedes aegypti GN=AAEL008798 PE=4 SV=1                                   |
| CCG008036.1 | 513  | 12  | 64 | 1.00513999 | 4.361266498 | 2.117350703  | Up   | 2.28E-07  | 4.32E-07   | CCA-adding enzyme OS=Culex quinquefasciatus GN=CpipJ_CPIJ013325 PE=3 SV=1                |
| CCG000109.1 | 496  | 12  | 64 | 1.03959035 | 4.51074539  | 2.117350703  | Up   | 2.28E-07  | 4.32E-07   | AGAP003907-PA OS=Anopheles gambiae GN=AGAP003907 PE=4 SV=2                               |
| CCG027826.1 | 681  | 13  | 64 | 0.82027394 | 3.285359344 | 2.001873486  | Up   | 3.33E-07  | 6.25E-07   | Putative uncharacterized protein OS=Culex quinquefasciatus GN=CpipJ_CPIJ011583 PE=4 SV=1 |

|             |      |     |    |            |             |              |      |           |            |                                                                                                            |
|-------------|------|-----|----|------------|-------------|--------------|------|-----------|------------|------------------------------------------------------------------------------------------------------------|
| CCG004654.1 | 345  | 16  | 64 | 1.99279929 | 6.485013662 | 1.702313204  | Up   | 3.99E-06  | 7.15E-06   | AAEL012940-PA OS=Aedes aegypti GN=AAEL012940 PE=4 SV=1                                                     |
| CCG023526.2 | 759  | 18  | 64 | 1.01904509 | 2.947733483 | 1.532388202  | Up   | 1.88E-05  | 3.24E-05   | AAEL008673-PA OS=Aedes aegypti GN=AAEL008673 PE=3 SV=1                                                     |
| CCG013604.1 | 2438 | 19  | 64 | 0.33487488 | 0.917690613 | 1.45438569   | Up   | 3.83E-05  | 6.46E-05   | Retrovirus-related Pol polyprotein from transposon TNT 1-94 OS=Trichinella spiralis GN=Tsp_01017 PE=4 SV=1 |
| CCG022285.1 | 646  | 19  | 64 | 1.26381572 | 3.46335869  | 1.45438569   | Up   | 3.83E-05  | 6.46E-05   | -                                                                                                          |
| CCG023989.1 | 678  | 23  | 64 | 1.45767536 | 3.299896332 | 1.178751248  | Up   | 0.0004566 | 0.00071918 | AAEL012676-PA OS=Aedes aegypti GN=AAEL012676 PE=4 SV=1                                                     |
| CCG025122.1 | 1102 | 109 | 64 | 4.25018246 | 2.030244749 | -1.065871121 | Down | 1.70E-06  | 3.10E-06   | AAEL007107-PA OS=Aedes aegypti GN=AAEL007107 PE=3 SV=1                                                     |
| CCG027940.1 | 1719 | 111 | 64 | 2.77466    | 1.301529793 | -1.092102663 | Down | 8.35E-07  | 1.54E-06   | AAEL002880-PA OS=Aedes aegypti GN=AAEL002880 PE=3 SV=1                                                     |
| CCG025828.1 | 756  | 114 | 64 | 6.47956316 | 2.959430838 | -1.13057681  | Down | 2.81E-07  | 5.29E-07   | Uncharacterized protein OS=Anopheles darlingi GN=AND_05262 PE=4 SV=1                                       |
| CCG017284.1 | 891  | 120 | 64 | 5.78716964 | 2.511032226 | -1.204577392 | Down | 2.95E-08  | 5.79E-08   | AAEL012777-PA OS=Aedes aegypti GN=AAEL012777 PE=3 SV=1                                                     |
| CCG002333.1 | 2103 | 123 | 64 | 2.51320844 | 1.06387528  | -1.240201302 | Down | 9.20E-09  | 1.84E-08   | AAEL000134-PA OS=Aedes aegypti GN=AAEL000134 PE=4 SV=1                                                     |
| CCG011879.1 | 1243 | 124 | 64 | 4.28660265 | 1.799943454 | -1.251883107 | Down | 6.21E-09  | 1.25E-08   | AAEL007050-PA OS=Aedes aegypti GN=AAEL007050 PE=3 SV=1                                                     |
| CCG002960.1 | 1051 | 133 | 64 | 5.43765433 | 2.12876281  | -1.352969232 | Down | 1.61E-10  | 3.41E-10   | -                                                                                                          |
| CCG012634.1 | 8082 | 146 | 64 | 0.77624118 | 0.27682872  | -1.487511355 | Down | 5.91E-13  | 1.52E-12   | AAEL011166-PA (Fragment) OS=Aedes aegypti GN=AAEL011166 PE=4 SV=1                                          |
| CCG017691.1 | 1323 | 179 | 64 | 5.81374338 | 1.691103336 | -1.781502573 | Down | 9.48E-20  | 3.69E-19   | AAEL012767-PA OS=Aedes aegypti GN=AAEL012767 PE=4 SV=1                                                     |
| CCG027513.1 | 702  | 184 | 64 | 11.2627225 | 3.187079364 | -1.821248752 | Down | 7.64E-21  | 3.00E-20   | AAEL005218-PA OS=Aedes aegypti GN=AAEL005218 PE=4 SV=1                                                     |
| CCG010745.1 | 1143 | 184 | 64 | 6.91726261 | 1.957418822 | -1.821248752 | Down | 7.64E-21  | 3.00E-20   | AGAP005258-PA OS=Anopheles gambiae GN=AGAP005258 PE=4 SV=4                                                 |

|             |      |     |    |            |             |              |      |           |            |                                                                                              |
|-------------|------|-----|----|------------|-------------|--------------|------|-----------|------------|----------------------------------------------------------------------------------------------|
| CCG005998.1 | 3432 | 208 | 64 | 2.60422634 | 0.651902597 | -1.998126514 | Down | 2.74E-26  | 1.13E-25   | AAEL001566-PA OS=Aedes aegypti GN=AAEL001566 PE=3 SV=1                                       |
| CCG028472.1 | 2021 | 211 | 64 | 4.48620188 | 1.107040927 | -2.018785985 | Down | 5.45E-27  | 2.25E-26   | AAEL005003-PA OS=Aedes aegypti GN=AAEL005003 PE=3 SV=1                                       |
| CCG010082.1 | 735  | 263 | 64 | 15.3755649 | 3.043986005 | -2.336605785 | Down | 9.81E-40  | 4.37E-39   | AAEL000820-PA OS=Aedes aegypti GN=AAEL008826 PE=4 SV=1                                       |
| CCG019258.1 | 1494 | 739 | 64 | 21.254775  | 1.497543316 | -3.82711735  | Down | 7.49E-179 | 4.38E-178  | AAEL003568-PA OS=Aedes aegypti GN=AAEL003568 PE=4 SV=1                                       |
| CCG007963.1 | 2517 | 896 | 64 | 15.2963378 | 0.888887451 | -4.105041718 | Down | 2.27E-228 | 1.38E-227  | AAEL000927-PA OS=Aedes aegypti GN=AAEL006927 PE=4 SV=1                                       |
| CCG008028.1 | 2383 | 2   | 65 | 0.03606356 | 0.953540911 | 4.724681017  | Up   | 9.36E-05  | 0.00015371 | Putative uncharacterized protein OS=Aedes aegypti PE=4 SV=1                                  |
| CCG020266.1 | 357  | 6   | 65 | 0.72218041 | 6.364952353 | 3.139718516  | Up   | 8.38E-06  | 1.47E-05   | AAEL008355-PA OS=Aedes aegypti GN=AAEL008355 PE=4 SV=1                                       |
| CCG001700.1 | 738  | 8   | 65 | 0.46579658 | 3.078981017 | 2.724681017  | Up   | 2.19E-06  | 3.96E-06   | GK19301 OS=Drosophila willistoni GN=GK19301 PE=4 SV=1                                        |
| CCG025343.1 | 436  | 11  | 65 | 1.08409881 | 5.211669702 | 2.265249398  | Up   | 2.88E-07  | 5.42E-07   | -                                                                                            |
| CCG001614.1 | 942  | 11  | 65 | 0.50176972 | 2.412195319 | 2.265249398  | Up   | 2.88E-07  | 5.42E-07   | Elongation factor-1 beta,delta OS=Culex quinquefasciatus GN=CpipJ_CPIJ004079 PE=3 SV=1       |
| CCG023417.1 | 261  | 19  | 65 | 3.12806497 | 8.706084254 | 1.476753503  | Up   | 2.70E-05  | 4.61E-05   | Putative uncharacterized protein GLEAN_07454 OS=Tribolium castaneum GN=GLEAN_07454 PE=4 SV=1 |
| CCG001599.1 | 885  | 22  | 65 | 1.06817419 | 2.567557051 | 1.265249398  | Up   | 0.0001882 | 0.00030292 | Putative uncharacterized protein OS=Culex quinquefasciatus GN=CpipJ_CPIJ006742 PE=4 SV=1     |
| CCG021559.1 | 1080 | 24  | 65 | 0.95488299 | 2.103970361 | 1.139718516  | Up   | 0.0005823 | 0.00091159 | AAEL007779-PA OS=Aedes aegypti GN=AAEL007779 PE=4 SV=1                                       |
| CCG019566.1 | 1920 | 120 | 65 | 2.68560841 | 1.183483328 | -1.182209579 | Down | 4.70E-08  | 9.15E-08   | AAEL004391-PA OS=Aedes aegypti GN=AAEL004391 PE=4 SV=1                                       |
| CCG000349.1 | 1293 | 129 | 65 | 4.28700369 | 1.757376636 | -1.286546239 | Down | 1.40E-09  | 2.87E-09   | AAEL005959-PA OS=Aedes aegypti GN=AAEL005959 PE=4 SV=1                                       |
| CCG024112.1 | 1083 | 131 | 65 | 5.1976318  | 2.098142189 | -1.308741985 | Down | 6.21E-10  | 1.29E-09   | AAEL014334-PA OS=Aedes aegypti GN=AAEL014334 PE=4 SV=1                                       |



|             |      |       |    |            |             |              |      |          |          |                                                                                                     |
|-------------|------|-------|----|------------|-------------|--------------|------|----------|----------|-----------------------------------------------------------------------------------------------------|
| CCG028350.1 | 1233 | 135   | 65 | 4.70471547 | 1.842893747 | -1.35213458  | Down | 1.20E-10 | 2.55E-10 | AAEL007224-PA OS=Aedes aegypti GN=AAEL007224 PE=4 SV=1                                              |
| CCG014643.1 | 1094 | 143   | 65 | 5.61670206 | 2.077045695 | -1.43519032  | Down | 3.98E-12 | 9.19E-12 | AAEL000123-PA OS=Aedes aegypti GN=AAEL000123 PE=4 SV=1                                              |
| CCG025510.1 | 3849 | 145   | 65 | 1.61876111 | 0.590358013 | -1.455228073 | Down | 1.66E-12 | 3.99E-12 | AAEL012395-PA OS=Aedes aegypti GN=AAEL012395 PE=3 SV=1                                              |
| CCG018455.1 | 2064 | 148   | 65 | 3.08116314 | 1.100914724 | -1.484772349 | Down | 4.43E-13 | 1.16E-12 | AAEL002294-PA (Fragment) OS=Aedes aegypti GN=AAEL002294 PE=4 SV=1                                   |
| CCG008866.1 | 816  | 152   | 65 | 8.00416625 | 2.784666655 | -1.523246497 | Down | 7.38E-14 | 2.39E-13 | Putative uncharacterized protein OS=Culex quinquefasciatus GN=CpipJ_CPIJ015436 PE=4 SV=1            |
| CCG023602.2 | 450  | 169   | 65 | 16.1375226 | 5.049528867 | -1.676198419 | Down | 2.63E-17 | 9.99E-17 | Putative uncharacterized protein OS=Culex quinquefasciatus GN=CpipJ_CPIJ016740 PE=4 SV=1            |
| CCG016390.1 | 2031 | 221   | 65 | 4.67568259 | 1.118802555 | -2.063221543 | Down | 5.72E-29 | 2.40E-28 | AAEL013801-PA OS=Aedes aegypti GN=AAEL013801 PE=4 SV=1                                              |
| CCG011870.1 | 2006 | 262   | 65 | 5.61219864 | 1.132745758 | -2.308741985 | Down | 4.92E-39 | 2.19E-38 | Putative uncharacterized protein OS=Culex quinquefasciatus GN=CpipJ_CPIJ001097 PE=4 SV=1            |
| CCG016253.1 | 1929 | 274   | 65 | 6.10352892 | 1.177961633 | -2.373351066 | Down | 4.32E-42 | 1.95E-41 | AAEL013371-PA OS=Aedes aegypti GN=AAEL013371 PE=4 SV=1                                              |
| CCG017894.1 | 1091 | 425   | 65 | 16.7388975 | 2.082757095 | -3.006638014 | Down | 2.10E-83 | 1.07E-82 | Pyrroline-5-carboxylate reductase OS=Aedes aegypti PE=2 SV=1                                        |
| CCG009782.1 | 537  | 17096 | 65 | 1367.98991 | 4.231448771 | -8.336690176 | Down | 0        | 0        | AAEL006575-PA OS=Aedes aegypti GN=AAEL006575 PE=4 SV=1                                              |
| CCG024723.1 | 768  | 6     | 66 | 0.33570105 | 3.00422691  | 3.161744822  | Up   | 8.38E-06 | 1.47E-05 | Putative reverse transcriptase OS=Anopheles gambiae PE=4 SV=1                                       |
| CCG020806.1 | 330  | 8     | 66 | 1.04169054 | 6.991655354 | 2.746707323  | Up   | 2.19E-06 | 3.96E-06 | AAEL001177-PA OS=Aedes aegypti GN=AAEL001177 PE=4 SV=1                                              |
| CCG027916.1 | 1511 | 8     | 66 | 0.22750356 | 1.526966424 | 2.746707323  | Up   | 2.19E-06 | 3.96E-06 | Pao retrotransposon peptidase superfamily (Fragment) OS=Trichinella spiralis GN=Tsp_12554 PE=4 SV=1 |

|             |      |     |    |            |             |              |      |           |            |                                                                                          |
|-------------|------|-----|----|------------|-------------|--------------|------|-----------|------------|------------------------------------------------------------------------------------------|
| CCG014402.1 | 790  | 9   | 66 | 0.48952862 | 2.920564895 | 2.576782322  | Up   | 1.10E-06  | 2.01E-06   | -                                                                                        |
| CCG012089.1 | 1572 | 10  | 66 | 0.27334437 | 1.46771391  | 2.424779228  | Up   | 5.47E-07  | 1.02E-06   | AAEL003746-PA OS=Aedes aegypti GN=CYP9AE1 PE=3 SV=1                                      |
| CCG018680.1 | 552  | 10  | 66 | 0.77843722 | 4.179793962 | 2.424779228  | Up   | 5.47E-07  | 1.02E-06   | AAEL014169-PA OS=Aedes aegypti GN=AAEL014169 PE=4 SV=1                                   |
| CCG001235.1 | 777  | 11  | 66 | 0.60832314 | 2.969428915 | 2.287275705  | Up   | 2.81E-07  | 5.28E-07   | AAEL009682-PA OS=Aedes aegypti GN=AAEL009682 PE=3 SV=1                                   |
| CCG005223.1 | 1114 | 12  | 66 | 0.46286967 | 2.071136685 | 2.161744822  | Up   | 1.72E-07  | 3.26E-07   | -                                                                                        |
| CCG012517.1 | 453  | 13  | 66 | 1.23312704 | 5.093258867 | 2.046267605  | Up   | 1.80E-07  | 3.41E-07   | AAEL008821-PA OS=Aedes aegypti GN=AAEL008821 PE=4 SV=1                                   |
| CCG020826.1 | 1506 | 17  | 66 | 0.48505013 | 1.532036034 | 1.659244482  | Up   | 4.19E-06  | 7.50E-06   | AAEL010908-PA OS=Aedes aegypti GN=AAEL010908 PE=4 SV=1                                   |
| CCG020794.1 | 1251 | 21  | 66 | 0.72131449 | 1.844321556 | 1.3543899    | Up   | 7.33E-05  | 0.00012138 | AAEL005490-PA OS=Aedes aegypti GN=AAEL005490 PE=4 SV=1                                   |
| CCG006925.1 | 1608 | 24  | 66 | 0.64133932 | 1.434854644 | 1.161744822  | Up   | 0.0004318 | 0.00068138 | AAEL006823-PA OS=Aedes aegypti GN=AAEL006823 PE=4 SV=1                                   |
| CCG005797.1 | 342  | 123 | 66 | 15.4540274 | 6.746334114 | -1.195807182 | Down | 2.39E-08  | 4.71E-08   | -                                                                                        |
| CCG000438.1 | 696  | 124 | 66 | 7.65552743 | 3.315009004 | -1.207488987 | Down | 1.63E-08  | 3.22E-08   | AAEL010298-PA OS=Aedes aegypti GN=AAEL010298 PE=4 SV=1                                   |
| CCG017919.1 | 1131 | 128 | 66 | 4.86306457 | 2.040005541 | -1.253292677 | Down | 3.43E-09  | 6.95E-09   | AAEL013864-PA OS=Aedes aegypti GN=AAEL013864 PE=4 SV=1                                   |
| CCG010043.1 | 951  | 128 | 66 | 5.78351843 | 2.426126464 | -1.253292677 | Down | 3.43E-09  | 6.95E-09   | Putative uncharacterized protein OS=Culex quinquefasciatus GN=CpipJ_CPIJ017097 PE=4 SV=1 |
| CCG016133.1 | 1641 | 129 | 66 | 3.37787676 | 1.406000163 | -1.264519932 | Down | 2.31E-09  | 4.71E-09   | AAEL006804-PA OS=Aedes aegypti GN=CYP9J18 PE=3 SV=2                                      |
| CCG006997.1 | 377  | 148 | 66 | 16.8687552 | 6.120016623 | -1.462746042 | Down | 8.02E-13  | 2.01E-12   | AAEL014960-PA (Fragment) OS=Aedes aegypti GN=AAEL014960 PE=4 SV=1                        |
| CCG021014.1 | 2340 | 160 | 66 | 2.93810151 | 0.986002678 | -1.575220772 | Down | 3.58E-15  | 1.29E-14   | AAEL002031-PA OS=Aedes aegypti GN=CYP12F7 PE=3 SV=2                                      |
| CCG021591.1 | 1164 | 163 | 66 | 6.01723947 | 1.982170332 | -1.602020831 | Down | 8.88E-16  | 3.24E-15   | AAEL008165-PA OS=Aedes aegypti GN=AAEL008165 PE=4 SV=1                                   |
| CCG003838.2 | 3168 | 305 | 66 | 4.13692205 | 0.728297433 | -2.505958109 | Down | 1.11E-49  | 5.15E-49   | AAEL001687-PA OS=Aedes aegypti GN=AAEL001687 PE=4 SV=1                                   |

|             |      |     |    |            |             |              |      |           |            |                                                                                                  |
|-------------|------|-----|----|------------|-------------|--------------|------|-----------|------------|--------------------------------------------------------------------------------------------------|
| CCG008809.1 | 4338 | 930 | 66 | 9.21204546 | 0.531868665 | -4.114379583 | Down | 2.31E-237 | 1.42E-236  | AAEL007226-PA OS=Aedes aegypti GN=AAEL007226 PE=4 SV=1                                           |
| CCG006003.1 | 945  | 1   | 67 | 0.04547062 | 2.478523327 | 5.768402394  | Up   | 0.000587  | 0.00091831 | -                                                                                                |
| CCG017929.1 | 693  | 1   | 67 | 0.06200539 | 3.379804536 | 5.768402394  | Up   | 0.000587  | 0.00091791 | Putative uncharacterized protein OS=Culex quinquefasciatus GN=CpipJ_CPIJ008409 PE=4 SV=1         |
| CCG017509.1 | 1284 | 8   | 67 | 0.2677242  | 1.824146841 | 2.768402394  | Up   | 2.19E-06  | 3.96E-06   | AAEL000774-PA OS=Aedes aegypti GN=AAEL000774 PE=4 SV=1                                           |
| CCG023660.1 | 2076 | 9   | 67 | 0.18628498 | 1.128229549 | 2.598477393  | Up   | 1.10E-06  | 2.01E-06   | AAEL008045-PA OS=Aedes aegypti GN=AAEL008045 PE=4 SV=1                                           |
| CCG005459.1 | 918  | 10  | 67 | 0.4680799  | 2.551421072 | 2.446474299  | Up   | 5.45E-07  | 1.01E-06   | AAEL005327-PA OS=Aedes aegypti GN=AAEL005327 PE=4 SV=1                                           |
| CCG021927.1 | 450  | 10  | 67 | 0.95488299 | 5.204898986 | 2.446474299  | Up   | 5.45E-07  | 1.01E-06   | AAEL000284-PA OS=Aedes aegypti GN=AAEL000284 PE=4 SV=1                                           |
| CCG004739.1 | 1392 | 10  | 67 | 0.30869062 | 1.682618207 | 2.446474299  | Up   | 5.45E-07  | 1.01E-06   | AAEL000683-PA OS=Aedes aegypti GN=AAEL000683 PE=4 SV=1                                           |
| CCG028188.1 | 780  | 12  | 67 | 0.66107284 | 3.002826338 | 2.183439894  | Up   | 1.57E-07  | 2.98E-07   | -                                                                                                |
| CCG027184.1 | 396  | 14  | 67 | 1.51913203 | 5.914657939 | 1.961047472  | Up   | 2.35E-07  | 4.44E-07   | AAEL008932-PA OS=Aedes aegypti GN=AAEL008932 PE=3 SV=1                                           |
| CCG025672.1 | 736  | 15  | 67 | 0.87574187 | 3.18234313  | 1.861511799  | Up   | 5.33E-07  | 9.95E-07   | -                                                                                                |
| CCG014714.1 | 645  | 16  | 67 | 1.0659159  | 3.631324874 | 1.768402394  | Up   | 1.26E-06  | 2.30E-06   | Putative uncharacterized protein OS=Culex quinquefasciatus GN=CpipJ_CPIJ019728 PE=4 SV=1         |
| CCG009824.1 | 1152 | 17  | 67 | 0.63410199 | 2.033163666 | 1.680939553  | Up   | 2.87E-06  | 5.17E-06   | -                                                                                                |
| CCG011829.1 | 2030 | 25  | 67 | 0.52918392 | 1.153795342 | 1.124546205  | Up   | 0.0005478 | 0.00085857 | AAEL010485-PA OS=Aedes aegypti GN=AAEL010485 PE=3 SV=1                                           |
| CCG020996.1 | 921  | 122 | 67 | 5.69197353 | 2.543110254 | -1.162334943 | Down | 5.54E-08  | 1.07E-07   | Down syndrome cell adhesion molecule-like protein OS=Acromyrmex echinatio GN=G5I_10191 PE=4 SV=1 |
| CCG014689.1 | 936  | 155 | 67 | 7.1157146  | 2.502355282 | -1.507722011 | Down | 6.52E-14  | 2.14E-13   | AAEL008646-PA (Fragment) OS=Aedes aegypti GN=AAEL008646 PE=4 SV=1                                |

|             |      |      |    |            |             |              |      |           |           |                                                                                                 |
|-------------|------|------|----|------------|-------------|--------------|------|-----------|-----------|-------------------------------------------------------------------------------------------------|
| CCG020016.1 | 1805 | 206  | 67 | 4.90402511 | 1.297620246 | -1.918098133 | Down | 9.63E-25  | 3.91E-24  | Putative gag-pol protein<br>OS=Drosophila ananassae PE=4<br>SV=1                                |
| CCG009167.1 | 1112 | 240  | 67 | 9.27404344 | 2.10629905  | -2.138488201 | Down | 9.73E-33  | 4.16E-32  | AAEL015038-PA OS=Aedes<br>aegypti GN=AAEL015038 PE=4<br>SV=1                                    |
| CCG025900.1 | 1563 | 314  | 67 | 8.63243549 | 1.498531378 | -2.526218355 | Down | 1.44E-51  | 6.77E-51  | AAEL009520-PA OS=Aedes<br>aegypti GN=AAEL009520 PE=4<br>SV=1                                    |
| CCG015684.1 | 864  | 323  | 67 | 16.063917  | 2.710884889 | -2.56698796  | Down | 5.83E-54  | 2.76E-53  | AAEL000689-PA OS=Aedes<br>aegypti GN=AAEL000689 PE=3<br>SV=1                                    |
| CCG005194.1 | 5469 | 323  | 67 | 2.53779928 | 0.428269253 | -2.56698796  | Down | 5.83E-54  | 2.76E-53  | AAEL012496-PA OS=Aedes<br>aegypti GN=AAEL012496 PE=4<br>SV=1                                    |
| CCG023321.3 | 1890 | 374  | 67 | 8.50300568 | 1.239261663 | -2.778492066 | Down | 7.66E-68  | 3.78E-67  | AAEL008342-PA OS=Aedes<br>aegypti GN=AAEL008342 PE=4<br>SV=1                                    |
| CCG019899.1 | 801  | 405  | 67 | 21.7262703 | 2.924100554 | -2.893375703 | Down | 1.65E-76  | 8.29E-76  | Hydroxypyruvate isomerase<br>OS=Aedes aegypti<br>GN=AAEL002165 PE=3 SV=1                        |
| CCG025108.1 | 2646 | 510  | 67 | 8.28214839 | 0.885186902 | -3.225951043 | Down | 7.68E-107 | 4.10E-106 | AAEL012077-PA (Fragment)<br>OS=Aedes aegypti<br>GN=AAEL012077 PE=3 SV=1                         |
| CCG014698.1 | 1041 | 718  | 67 | 29.6371464 | 2.249956334 | -3.71943764  | Down | 7.45E-170 | 4.32E-169 | AAEL010344-PA OS=Aedes<br>aegypti GN=AAEL010344 PE=4<br>SV=1                                    |
| CCG003567.2 | 933  | 764  | 67 | 35.1863636 | 2.51040144  | -3.809026434 | Down | 3.82E-184 | 2.25E-183 | AAEL001293-PA OS=Aedes<br>aegypti GN=AAEL001293 PE=4<br>SV=1                                    |
| CCG016766.1 | 810  | 1105 | 67 | 58.6192059 | 2.891610548 | -4.34142826  | Down | 1.59E-292 | 9.97E-292 | AAEL013542-PA OS=Aedes<br>aegypti GN=AAEL013542 PE=4<br>SV=1                                    |
| CCG020270.1 | 459  | 3106 | 67 | 290.771232 | 5.102842143 | -5.83243972  | Down | 0         | 0         | AAEL002185-PA OS=Aedes<br>aegypti GN=AAEL002185 PE=4<br>SV=1                                    |
| CCG007086.1 | 631  | 0    | 68 | 0.001      | 3.767294486 | 11.8793131   | Up   | 4.44E-16  | 1.65E-15  | Putative uncharacterized protein<br>(Fragment) OS=Solenopsis invicta<br>GN=SINV_11683 PE=4 SV=1 |
| CCG014169.1 | 855  | 4    | 68 | 0.201028   | 2.780307392 | 3.789776045  | Up   | 2.95E-05  | 5.04E-05  | -                                                                                               |
| CCG007951.1 | 1578 | 12   | 68 | 0.32676604 | 1.506440317 | 2.204813544  | Up   | 1.48E-07  | 2.81E-07  | AAEL005945-PA (Fragment)<br>OS=Aedes aegypti<br>GN=GPRDOP4 PE=3 SV=2                            |

|             |      |     |    |            |             |              |      |          |            |                                                                                     |
|-------------|------|-----|----|------------|-------------|--------------|------|----------|------------|-------------------------------------------------------------------------------------|
| CCG010495.1 | 598  | 12  | 68 | 0.86226892 | 3.975188663 | 2.204813544  | Up   | 1.48E-07 | 2.81E-07   | AAEL003105-PA (Fragment)<br>OS=Aedes aegypti<br>GN=AAEL003105 PE=4 SV=1             |
| CCG028427.1 | 2019 | 20  | 68 | 0.42565364 | 1.177396147 | 1.46784795   | Up   | 1.90E-05 | 3.27E-05   | Proacrosin OS=Culex<br>quinquefasciatus<br>GN=CpipJ_CPIJ012481 PE=3<br>SV=1         |
| CCG006280.1 | 669  | 20  | 68 | 1.28459595 | 3.553307654 | 1.46784795   | Up   | 1.90E-05 | 3.27E-05   | AAEL000949-PA (Fragment)<br>OS=Aedes aegypti<br>GN=AAEL000949 PE=4 SV=1             |
| CCG000404.1 | 942  | 20  | 68 | 0.91230859 | 2.52352741  | 1.46784795   | Up   | 1.90E-05 | 3.27E-05   | AAEL004392-PA OS=Aedes<br>aegypti GN=IMP PE=4 SV=1                                  |
| CCG006844.1 | 501  | 22  | 68 | 1.88689453 | 4.744835969 | 1.330344426  | Up   | 7.13E-05 | 0.00011825 | Uncharacterized protein<br>OS=Anopheles darlingi<br>GN=AND_12274 PE=4 SV=1          |
| CCG001057.1 | 984  | 117 | 68 | 5.10920625 | 2.415815875 | -1.080588675 | Down | 5.30E-07 | 9.89E-07   | Phosphatidate cytidyltransferase<br>OS=Anopheles gambiae<br>GN=AGAP007175 PE=3 SV=4 |
| CCG005269.1 | 696  | 168 | 68 | 10.3720049 | 3.415463823 | -1.602541378 | Down | 3.18E-16 | 1.19E-15   | AAEL000254-PA OS=Aedes<br>aegypti GN=AAEL000254 PE=4<br>SV=1                        |
| CCG003270.1 | 759  | 185 | 68 | 10.473519  | 3.131966825 | -1.741605415 | Down | 9.05E-20 | 3.52E-19   | GJ11154 OS=Drosophila virilis<br>GN=GJ11154 PE=4 SV=1                               |
| CCG015674.1 | 1560 | 207 | 68 | 5.70175325 | 1.523822321 | -1.903710912 | Down | 1.28E-24 | 5.20E-24   | AAEL001442-PA OS=Aedes<br>aegypti GN=AAEL001442 PE=4<br>SV=1                        |
| CCG015379.1 | 1657 | 234 | 68 | 6.06814599 | 1.434618479 | -2.080588675 | Down | 6.72E-31 | 2.85E-30   | AAEL013421-PA OS=Aedes<br>aegypti GN=AAEL013421 PE=3<br>SV=1                        |
| CCG025946.1 | 1227 | 342 | 68 | 11.9768942 | 1.937378012 | -2.62807647  | Down | 1.51E-58 | 7.24E-58   | AAEL003560-PA OS=Aedes<br>aegypti GN=AAEL003560 PE=3<br>SV=1                        |
| CCG006316.3 | 1080 | 407 | 68 | 16.1932241 | 2.201076686 | -2.879108939 | Down | 1.74E-76 | 8.74E-76   | AAEL006344-PA OS=Aedes<br>aegypti GN=AAEL006344 PE=4<br>SV=1                        |
| CCG028497.1 | 918  | 1   | 69 | 0.04680799 | 2.627582895 | 5.810837661  | Up   | 0.000587 | 0.00091677 | AAEL012339-PA OS=Aedes<br>aegypti GN=AAEL012339 PE=4<br>SV=1                        |
| CCG023453.1 | 628  | 4   | 69 | 0.27369258 | 3.840957161 | 3.810837661  | Up   | 2.95E-05 | 5.04E-05   | -                                                                                   |
| CCG003233.1 | 1033 | 5   | 69 | 0.20798516 | 2.335063986 | 3.488909566  | Up   | 1.59E-05 | 2.76E-05   | -                                                                                   |
| CCG004042.1 | 363  | 11  | 69 | 1.30211317 | 6.644961701 | 2.351406042  | Up   | 2.71E-07 | 5.09E-07   | AAEL006460-PA OS=Aedes<br>aegypti GN=AAEL006460 PE=4<br>SV=1                        |

|             |      |     |    |            |             |              |      |          |            |                                                                                          |
|-------------|------|-----|----|------------|-------------|--------------|------|----------|------------|------------------------------------------------------------------------------------------|
| CCG000391.1 | 8652 | 23  | 69 | 0.11422837 | 0.278793469 | 1.287275705  | Up   | 9.55E-05 | 0.00015595 | AAEL010367-PA OS=Aedes aegypti GN=AAEL010367 PE=4 SV=1                                   |
| CCG026955.1 | 1404 | 25  | 69 | 0.7651306  | 1.71803497  | 1.166981471  | Up   | 0.000302 | 0.00048041 | AGAP005300-PA OS=Anopheles gambiae GN=AGAP005300 PE=2 SV=1                               |
| CCG020909.1 | 627  | 144 | 69 | 9.86864718 | 3.84708309  | -1.359087341 | Down | 2.42E-11 | 5.28E-11   | GTP-binding protein yptv3 OS=Culex quinquefasciatus GN=CpipJ_CPIJ004450 PE=3 SV=1        |
| CCG010944.1 | 2955 | 161 | 69 | 2.34115982 | 0.816284635 | -1.520079218 | Down | 1.49E-14 | 5.29E-14   | AAEL012294-PA OS=Aedes aegypti GN=AAEL012294 PE=3 SV=1                                   |
| CCG025963.1 | 750  | 333 | 69 | 19.0785622 | 3.216161463 | -2.568540706 | Down | 1.29E-55 | 6.12E-55   | AAEL003803-PA OS=Aedes aegypti GN=AAEL003803 PE=4 SV=1                                   |
| CCG021804.1 | 1264 | 368 | 69 | 12.5101759 | 1.908323653 | -2.712724295 | Down | 4.36E-65 | 2.13E-64   | AAEL000249-PA OS=Aedes aegypti GN=AAEL000249 PE=3 SV=1                                   |
| CCG000619.1 | 942  | 423 | 69 | 19.2953267 | 2.560638108 | -2.913676193 | Down | 2.06E-80 | 1.05E-79   | AAEL000723-PA OS=Aedes aegypti GN=AAEL006723 PE=4 SV=1                                   |
| CCG013070.1 | 2055 | 3   | 70 | 0.06272954 | 1.190792883 | 4.24663372   | Up   | 5.28E-05 | 8.86E-05   | Putative uncharacterized protein OS=Culex quinquefasciatus GN=CpipJ_CPIJ018868 PE=4 SV=1 |
| CCG010160.1 | 402  | 6   | 70 | 0.64133932 | 6.087262125 | 3.24663372   | Up   | 8.38E-06 | 1.48E-05   | AAEL008675-PA OS=Aedes aegypti GN=AAEL008675 PE=4 SV=1                                   |
| CCG011412.1 | 945  | 13  | 70 | 0.59111804 | 2.589501983 | 2.131156503  | Up   | 8.44E-08 | 1.62E-07   | AAEL009634-PA OS=Aedes aegypti GN=AAEL009634 PE=3 SV=1                                   |
| CCG017616.1 | 1116 | 16  | 70 | 0.61605354 | 2.192723453 | 1.831596221  | Up   | 3.90E-07 | 7.30E-07   | AAEL015070-PA OS=Aedes aegypti GN=ALP PE=2 SV=1                                          |
| CCG013901.1 | 665  | 16  | 70 | 1.03385828 | 3.679818608 | 1.831596221  | Up   | 3.90E-07 | 7.30E-07   | AAEL004635-PA OS=Aedes aegypti GN=AAEL004635 PE=4 SV=1                                   |
| CCG023504.1 | 725  | 17  | 70 | 1.00756619 | 3.375281895 | 1.74413338   | Up   | 9.12E-07 | 1.68E-06   | AAEL005483-PA OS=Aedes aegypti GN=AAEL005483 PE=4 SV=1                                   |
| CCG003884.1 | 1698 | 17  | 70 | 0.43020347 | 1.441153931 | 1.74413338   | Up   | 9.12E-07 | 1.68E-06   | AAEL012956-PA OS=Aedes aegypti GN=AAEL012956 PE=3 SV=1                                   |
| CCG027671.1 | 2481 | 18  | 70 | 0.3117514  | 0.986327841 | 1.661671219  | Up   | 2.06E-06 | 3.75E-06   | AAEL010614-PA OS=Aedes aegypti GN=AAEL010614 PE=4 SV=1                                   |
| CCG016975.1 | 1251 | 18  | 70 | 0.61826956 | 1.95609862  | 1.661671219  | Up   | 2.06E-06 | 3.75E-06   | AAEL011210-PA OS=Aedes aegypti GN=AAEL011210 PE=4 SV=1                                   |

|             |      |       |    |            |             |              |      |           |            |                                                                                              |
|-------------|------|-------|----|------------|-------------|--------------|------|-----------|------------|----------------------------------------------------------------------------------------------|
| CCG014818.1 | 282  | 22    | 70 | 3.3522488  | 8.677586433 | 1.372164602  | Up   | 3.68E-05  | 6.21E-05   | AAEL003171-PA OS=Aedes aegypti GN=AAEL003171 PE=4 SV=1                                       |
| CCG004717.1 | 778  | 23    | 70 | 1.27031349 | 3.145346239 | 1.308034265  | Up   | 6.91E-05  | 0.00011472 | -                                                                                            |
| CCG009937.1 | 1206 | 26    | 70 | 0.92637902 | 2.029087375 | 1.131156503  | Up   | 0.0003837 | 0.00060713 | AAEL004556-PA OS=Aedes aegypti GN=AAEL004556 PE=4 SV=1                                       |
| CCG016813.1 | 1033 | 128   | 70 | 5.32442016 | 2.368905493 | -1.168403779 | Down | 2.29E-08  | 4.50E-08   | AAEL008651-PA OS=Aedes aegypti GN=AAEL008651 PE=4 SV=1                                       |
| CCG010130.2 | 879  | 130   | 70 | 6.35502332 | 2.783935579 | -1.190771592 | Down | 1.07E-08  | 2.14E-08   | AAEL003929-PA OS=Aedes aegypti GN=AAEL003929 PE=4 SV=1                                       |
| CCG011769.1 | 1839 | 138   | 70 | 3.22448253 | 1.330657626 | -1.276928236 | Down | 4.74E-10  | 9.87E-10   | AAEL011809-PA OS=Aedes aegypti GN=AAEL011809 PE=3 SV=1                                       |
| CCG001674.1 | 1440 | 169   | 70 | 5.0429758  | 1.699360676 | -1.569283216 | Down | 7.30E-16  | 2.67E-15   | Putative uncharacterized protein OS=Culex quinquefasciatus GN=CpipJ_CPIJ018073 PE=4 SV=1     |
| CCG023486.1 | 1234 | 257   | 70 | 8.94912625 | 1.983046494 | -2.174028328 | Down | 1.18E-35  | 5.14E-35   | Putative uncharacterized protein GLEAN_15470 OS=Tribolium castaneum GN=GLEAN_15470 PE=4 SV=1 |
| CCG008125.1 | 3108 | 449   | 70 | 6.20766115 | 0.787348576 | -2.978975414 | Down | 3.36E-87  | 1.74E-86   | AAEL004214-PA (Fragment) OS=Aedes aegypti GN=AAEL004214 PE=4 SV=1                            |
| CCG021146.1 | 477  | 21879 | 70 | 1970.93254 | 5.130145438 | -8.585662959 | Down | 0         | 0          | AAEL011741-PB OS=Aedes aegypti GN=GSTS1 PE=3 SV=2                                            |
| CCG028184.1 | 525  | 0     | 71 | 0.001      | 4.727690763 | 12.20691996  | Up   | 4.44E-16  | 1.64E-15   | Putative uncharacterized protein OS=Aedes triseriatus PE=2 SV=1                              |
| CCG009757.1 | 396  | 2     | 71 | 0.21701886 | 6.267771846 | 4.852060323  | Up   | 9.36E-05  | 0.0001539  | AAEL006197-PA OS=Aedes aegypti GN=AAEL006197 PE=4 SV=1                                       |
| CCG014142.1 | 291  | 5     | 71 | 0.73831159 | 8.529339006 | 3.530132228  | Up   | 1.59E-05  | 2.76E-05   | AGAP000639-PA OS=Anopheles gambiae GN=AgaP_AGAP000639 PE=3 SV=5                              |
| CCG018287.1 | 381  | 6     | 71 | 0.67668873 | 6.514534517 | 3.267097823  | Up   | 8.38E-06  | 1.48E-05   | Histone H2A OS=Aedes aegypti GN=AAEL003669 PE=3 SV=1                                         |
| CCG014915.1 | 1047 | 7     | 71 | 0.28728571 | 2.370618578 | 3.044705401  | Up   | 4.31E-06  | 7.69E-06   | AAEL006329-PA OS=Aedes aegypti GN=AAEL006329 PE=4 SV=1                                       |
| CCG005532.1 | 814  | 8     | 71 | 0.42230697 | 3.049186303 | 2.852060323  | Up   | 2.19E-06  | 3.96E-06   | -                                                                                            |

|             |      |     |    |            |             |              |      |           |            |                                                                                                                           |
|-------------|------|-----|----|------------|-------------|--------------|------|-----------|------------|---------------------------------------------------------------------------------------------------------------------------|
| CCG015202.1 | 732  | 8   | 71 | 0.46961459 | 3.390761818 | 2.852060323  | Up   | 2.19E-06  | 3.96E-06   | AAEL010866-PA OS=Aedes aegypti GN=AAEL010866 PE=3 SV=1                                                                    |
| CCG001096.1 | 603  | 13  | 71 | 0.92637902 | 4.116148675 | 2.151620605  | Up   | 7.70E-08  | 1.48E-07   | Coactivator required for Sp1 transcriptional activation subunit 9 OS=Culex quinquefasciatus GN=CpipJ_CPIJ007281 PE=4 SV=1 |
| CCG026307.1 | 636  | 13  | 71 | 0.87831219 | 3.902574923 | 2.151620605  | Up   | 7.70E-08  | 1.48E-07   | Putative uncharacterized protein OS=Culex quinquefasciatus GN=CpipJ_CPIJ003129 PE=4 SV=1                                  |
| CCG018041.1 | 564  | 13  | 71 | 0.99043715 | 4.400775977 | 2.151620605  | Up   | 7.70E-08  | 1.48E-07   | AAEL012187-PA OS=Aedes aegypti GN=AAEL012187 PE=4 SV=1                                                                    |
| CCG000499.1 | 1224 | 15  | 71 | 0.52658988 | 2.027808538 | 1.945169728  | Up   | 1.17E-07  | 2.23E-07   | Uncharacterized protein OS=Anopheles darlingi GN=AND_14401 PE=4 SV=1                                                      |
| CCG022645.1 | 525  | 15  | 71 | 1.2277067  | 4.727690763 | 1.945169728  | Up   | 1.17E-07  | 2.23E-07   | GSG8-like protein OS=Aedes aegypti PE=2 SV=1                                                                              |
| CCG010639.1 | 225  | 15  | 71 | 2.86464897 | 11.03127845 | 1.945169728  | Up   | 1.17E-07  | 2.23E-07   | AAEL000719-PA OS=Aedes aegypti GN=AAEL000719 PE=4 SV=1                                                                    |
| CCG023143.1 | 957  | 18  | 71 | 0.80820817 | 2.593560764 | 1.682135322  | Up   | 1.42E-06  | 2.59E-06   | AAEL006426-PA OS=Aedes aegypti GN=AAEL006426 PE=4 SV=1                                                                    |
| CCG026943.1 | 575  | 23  | 71 | 1.71878938 | 4.316587219 | 1.328498367  | Up   | 4.99E-05  | 8.38E-05   | -                                                                                                                         |
| CCG019534.1 | 1539 | 24  | 71 | 0.67009333 | 1.612760007 | 1.267097823  | Up   | 9.19E-05  | 0.00015144 | AAEL010406-PA OS=Aedes aegypti GN=AAEL010406 PE=4 SV=1                                                                    |
| CCG008380.1 | 1534 | 25  | 71 | 0.70028903 | 1.618016722 | 1.208204134  | Up   | 0.0001642 | 0.0002649  | AAEL003987-PA OS=Aedes aegypti GN=AAEL003987 PE=4 SV=1                                                                    |
| CCG016019.1 | 1035 | 121 | 71 | 5.02351487 | 2.39810401  | -1.066802914 | Down | 4.49E-07  | 8.39E-07   | AAEL010041-PA OS=Aedes aegypti GN=AAEL010041 PE=4 SV=1                                                                    |
| CCG018206.1 | 2169 | 123 | 71 | 2.4367346  | 1.14432349  | -1.090454182 | Down | 2.21E-07  | 4.18E-07   | AAEL014140-PA OS=Aedes aegypti GN=CLIPB24 PE=3 SV=1                                                                       |
| CCG018782.1 | 1455 | 137 | 71 | 4.04594752 | 1.705867801 | -1.24597176  | Down | 1.16E-09  | 2.38E-09   | AAEL005243-PA OS=Aedes aegypti GN=AAEL005243 PE=4 SV=1                                                                    |
| CCG011172.1 | 966  | 141 | 71 | 6.2719799  | 2.569397154 | -1.287491029 | Down | 2.36E-10  | 4.98E-10   | Annexin OS=Aedes aegypti GN=AAEL005412 PE=3 SV=1                                                                          |



|             |      |     |    |            |             |              |      |           |           |                                                                                                   |
|-------------|------|-----|----|------------|-------------|--------------|------|-----------|-----------|---------------------------------------------------------------------------------------------------|
| CCG008388.1 | 919  | 147 | 71 | 6.87328726 | 2.700802667 | -1.347612022 | Down | 2.04E-11  | 4.46E-11  | Aminomethyltransferase<br>OS=Aedes aegypti<br>GN=AAEL010276 PE=3 SV=1                             |
| CCG017856.1 | 1308 | 169 | 71 | 5.55189996 | 1.897582302 | -1.548819113 | Down | 1.38E-15  | 5.00E-15  | AAEL012486-PA OS=Aedes<br>aegypti GN=AAEL012486 PE=4<br>SV=1                                      |
| CCG024068.1 | 522  | 180 | 71 | 14.8171499 | 4.7548614   | -1.639792773 | Down | 8.24E-18  | 3.14E-17  | AAEL008638-PA OS=Aedes<br>aegypti GN=CYP49A1 PE=3 SV=1                                            |
| CCG022587.1 | 2570 | 227 | 71 | 3.79538123 | 0.965773405 | -1.974488164 | Down | 4.02E-28  | 1.68E-27  | AAEL013884-PA OS=Aedes<br>aegypti GN=AAEL013884 PE=4<br>SV=1                                      |
| CCG009616.1 | 1032 | 276 | 71 | 11.4919058 | 2.405075243 | -2.256464133 | Down | 6.28E-40  | 2.80E-39  | AAEL009632-PA OS=Aedes<br>aegypti GN=AAEL009632 PE=3<br>SV=1                                      |
| CCG002848.1 | 727  | 327 | 71 | 19.3275147 | 3.414082051 | -2.501086502 | Down | 4.98E-53  | 2.35E-52  | AAEL003464-PA OS=Aedes<br>aegypti GN=AAEL003464 PE=4<br>SV=1                                      |
| CCG002683.1 | 1419 | 457 | 71 | 13.8387376 | 1.749145631 | -2.983990032 | Down | 7.12E-89  | 3.69E-88  | Uncharacterized protein<br>OS=Anopheles darlingi<br>GN=AND_03450 PE=4 SV=1                        |
| CCG009376.1 | 702  | 514 | 71 | 31.4621704 | 3.535666169 | -3.153564226 | Down | 2.36E-105 | 1.26E-104 | AAEL005218-PA OS=Aedes<br>aegypti GN=AAEL005218 PE=4<br>SV=1                                      |
| CCG023444.1 | 1587 | 542 | 71 | 14.6752339 | 1.563980876 | -3.230088718 | Down | 1.42E-113 | 7.69E-113 | AAEL002669-PA OS=Aedes<br>aegypti GN=AAEL002669 PE=4<br>SV=1                                      |
| CCG021005.1 | 1689 | 663 | 71 | 16.8673381 | 1.469530877 | -3.520804737 | Down | 7.52E-150 | 4.27E-149 | Putative uncharacterized protein<br>OS=Culex quinquefasciatus<br>GN=CpipJ_CPIJ003199 PE=4<br>SV=1 |
| CCG017305.1 | 720  | 856 | 71 | 51.08624   | 3.447274515 | -3.889406663 | Down | 1.55E-209 | 9.27E-209 | AAEL006598-PA OS=Aedes<br>aegypti GN=AAEL006598 PE=3<br>SV=1                                      |
| CCG006375.1 | 1099 | 0   | 72 | 0.001      | 2.290260171 | 11.16129578  | Up   | 4.44E-16  | 1.63E-15  | Peritrophin OS=Aedes aegypti<br>PE=2 SV=1                                                         |
| CCG009873.1 | 603  | 6   | 72 | 0.42755955 | 4.1741226   | 3.287275705  | Up   | 8.38E-06  | 1.48E-05  | AAEL000739-PA OS=Aedes<br>aegypti GN=AAEL000739 PE=4<br>SV=1                                      |
| CCG011452.1 | 1448 | 11  | 72 | 0.32642754 | 1.738256856 | 2.412806587  | Up   | 2.68E-07  | 5.04E-07  | AAEL012478-PA OS=Aedes<br>aegypti GN=AAEL012478 PE=4<br>SV=1                                      |
| CCG025406.1 | 2082 | 12  | 72 | 0.24766418 | 1.208931762 | 2.287275705  | Up   | 1.33E-07  | 2.54E-07  | Starlet OS=Culex<br>quinquefasciatus<br>GN=CpipJ_CPIJ003276 PE=2<br>SV=1                          |
| CCG014251.1 | 1863 | 15  | 72 | 0.3459721  | 1.351044513 | 1.96534761   | Up   | 8.21E-08  | 1.58E-07  | AAEL008523-PA OS=Aedes<br>aegypti GN=AAEL008523 PE=4<br>SV=1                                      |

|             |      |      |    |            |             |              |      |           |            |                                                                                                                                                                              |
|-------------|------|------|----|------------|-------------|--------------|------|-----------|------------|------------------------------------------------------------------------------------------------------------------------------------------------------------------------------|
| CCG004932.1 | 1071 | 15   | 72 | 0.60181701 | 2.350136254 | 1.96534761   | Up   | 8.21E-08  | 1.58E-07   | AAEL003007-PA OS=Aedes aegypti GN=AAEL003007 PE=4 SV=1                                                                                                                       |
| CCG004128.1 | 314  | 25   | 72 | 3.42115721 | 8.015910597 | 1.228382015  | Up   | 0.0001205 | 0.00019594 | LINE-1 retrotransposon-like element, putative (Fragment) OS=Aspergillus flavus (strain ATCC 200026 / FGSC A1120 / NRRL 3357 / JCM 12722 / SRRC 167) GN=AFLA_063980 PE=4 SV=1 |
| CCG025572.1 | 1134 | 28   | 72 | 1.0609811  | 2.219573128 | 1.064883283  | Up   | 0.0006002 | 0.00093387 | AAEL001373-PA OS=Aedes aegypti GN=AAEL001373 PE=3 SV=1                                                                                                                       |
| CCG005679.1 | 597  | 141  | 72 | 10.1486308 | 4.216073581 | -1.267313147 | Down | 3.90E-10  | 8.15E-10   | AAEL001355-PA OS=Aedes aegypti GN=AAEL001355 PE=4 SV=1                                                                                                                       |
| CCG000602.1 | 1086 | 159  | 72 | 6.29114899 | 2.317675808 | -1.44064475  | Down | 2.17E-13  | 6.21E-13   | AAEL002010-PA OS=Aedes aegypti GN=AAEL002010 PE=3 SV=1                                                                                                                       |
| CCG012361.1 | 586  | 265  | 72 | 19.4317059 | 4.295214894 | -2.177610344 | Down | 8.68E-37  | 3.80E-36   | -                                                                                                                                                                            |
| CCG009347.2 | 234  | 556  | 72 | 102.099028 | 10.75639285 | -3.246702867 | Down | 5.00E-117 | 2.72E-116  | AAEL002074-PA OS=Aedes aegypti GN=AAEL002074 PE=4 SV=1                                                                                                                       |
| CCG008675.1 | 1353 | 804  | 72 | 25.5341217 | 1.860307411 | -3.778813486 | Down | 1.87E-192 | 1.11E-191  | AAEL007575-PA OS=Aedes aegypti GN=AAEL007575 PE=4 SV=1                                                                                                                       |
| CCG002051.1 | 870  | 1113 | 72 | 54.971626  | 2.893098767 | -4.247999672 | Down | 2.95E-290 | 1.85E-289  | AAEL002089-PA OS=Aedes aegypti GN=AAEL002089 PE=4 SV=1                                                                                                                       |
| CCG014491.1 | 975  | 2    | 73 | 0.08814305 | 2.617388928 | 4.892137763  | Up   | 9.36E-05  | 0.00015401 | AAEL000529-PA OS=Aedes aegypti GN=AAEL000529 PE=4 SV=1                                                                                                                       |
| CCG010858.1 | 567  | 4    | 73 | 0.30313746 | 4.500801066 | 3.892137763  | Up   | 2.95E-05  | 5.03E-05   | Uncharacterized protein OS=Anopheles darlingi GN=AND_00155 PE=4 SV=1                                                                                                         |
| CCG027027.1 | 186  | 5    | 73 | 1.15510039 | 13.72018389 | 3.570209668  | Up   | 1.59E-05  | 2.76E-05   | -                                                                                                                                                                            |
| CCG027866.1 | 1539 | 12   | 73 | 0.33504666 | 1.658189866 | 2.307175262  | Up   | 1.32E-07  | 2.52E-07   | AAEL012391-PA OS=Aedes aegypti GN=AAEL012391 PE=4 SV=1                                                                                                                       |
| CCG018271.1 | 2094 | 12   | 73 | 0.2462449  | 1.218698283 | 2.307175262  | Up   | 1.32E-07  | 2.52E-07   | Monocarboxylate transporter OS=Culex quinquefasciatus GN=CpipJ_CPIJ006419 PE=4 SV=1                                                                                          |
| CCG014565.1 | 621  | 15   | 73 | 1.03791629 | 4.10942706  | 1.985247167  | Up   | 5.93E-08  | 1.15E-07   | AAEL011990-PA (Fragment) OS=Aedes aegypti GN=AAEL011990 PE=4 SV=1                                                                                                            |

|             |      |     |    |            |             |              |      |          |            |                                                                         |
|-------------|------|-----|----|------------|-------------|--------------|------|----------|------------|-------------------------------------------------------------------------|
| CCG004123.1 | 2382 | 18  | 73 | 0.32470832 | 1.071349372 | 1.722212761  | Up   | 6.61E-07 | 1.23E-06   | AAEL007835-PA OS=Aedes aegypti GN=AAEL007835 PE=4 SV=1                  |
| CCG022233.1 | 504  | 23  | 73 | 1.96092043 | 5.063401199 | 1.368575807  | Up   | 2.58E-05 | 4.41E-05   | AAEL014499-PA OS=Aedes aegypti GN=AAEL014499 PE=4 SV=1                  |
| CCG002389.1 | 1908 | 27  | 73 | 0.60806228 | 1.337502204 | 1.137250261  | Up   | 0.000269 | 0.00042917 | AAEL012036-PA OS=Aedes aegypti GN=AAEL012036 PE=4 SV=1                  |
| CCG002634.1 | 927  | 27  | 73 | 1.25154567 | 2.752917157 | 1.137250261  | Up   | 0.000269 | 0.0004292  | AAEL010866-PA OS=Aedes aegypti GN=AAEL010866 PE=3 SV=1                  |
| CCG004552.1 | 828  | 127 | 73 | 6.59076847 | 3.082070295 | -1.096546924 | Down | 1.23E-07 | 2.36E-07   | AAEL001882-PA OS=Aedes aegypti GN=AAEL001882 PE=4 SV=1                  |
| CCG024998.1 | 1836 | 129 | 73 | 3.01911534 | 1.38995327  | -1.119089493 | Down | 6.00E-08 | 1.16E-07   | AAEL003653-PA OS=Aedes aegypti GN=SRPN12 PE=4 SV=2                      |
| CCG007684.1 | 2122 | 159 | 73 | 3.21969265 | 1.202617438 | -1.420745193 | Down | 3.84E-13 | 1.03E-12   | AAEL001515-PA OS=Aedes aegypti GN=AAEL001515 PE=4 SV=1                  |
| CCG024069.1 | 1026 | 173 | 73 | 7.2453841  | 2.4872848   | -1.542490465 | Down | 7.80E-16 | 2.84E-15   | AAEL008638-PA OS=Aedes aegypti GN=CYP49A1 PE=3 SV=1                     |
| CCG004335.1 | 1785 | 180 | 73 | 4.33308248 | 1.429666221 | -1.599715334 | Down | 3.10E-17 | 1.18E-16   | AAEL011716-PA OS=Aedes aegypti GN=AAEL011716 PE=4 SV=1                  |
| CCG005330.1 | 1875 | 221 | 73 | 5.06469939 | 1.361042242 | -1.895764797 | Down | 4.89E-26 | 2.00E-25   | AAEL013271-PA OS=Aedes aegypti GN=AAEL013271 PE=4 SV=1                  |
| CCG022286.1 | 1515 | 230 | 73 | 6.52345806 | 1.684458221 | -1.953352288 | Down | 4.36E-28 | 1.81E-27   | AGAP004228-PA OS=Anopheles gambiae GN=AgaP_AGAP004228 PE=4 SV=4         |
| CCG018923.1 | 2807 | 270 | 73 | 4.13317718 | 0.909139367 | -2.184677834 | Down | 1.34E-37 | 5.91E-37   | AAEL008483-PA OS=Aedes aegypti GN=AAEL008483 PE=4 SV=1                  |
| CCG026384.1 | 3336 | 289 | 73 | 3.72249799 | 0.764974282 | -2.28278792  | Down | 2.58E-42 | 1.16E-41   | AAEL002632-PA OS=Aedes aegypti GN=AAEL002632 PE=3 SV=1                  |
| CCG016304.1 | 225  | 453 | 73 | 86.512399  | 11.34201869 | -2.931229477 | Down | 1.59E-86 | 8.19E-86   | AAEL006000-PA OS=Aedes aegypti GN=AAEL006000 PE=4 SV=1                  |
| CCG028235.1 | 567  | 2   | 74 | 0.15156873 | 4.562455875 | 4.911766569  | Up   | 9.36E-05 | 0.00015368 | AAEL007059-PA OS=Aedes aegypti GN=PGRPS5_b PE=4 SV=1                    |
| CCG027029.1 | 676  | 3   | 74 | 0.19069409 | 3.826793611 | 4.326804069  | Up   | 5.28E-05 | 8.85E-05   | -                                                                       |
| CCG014770.1 | 252  | 5   | 74 | 0.8525741  | 10.26552572 | 3.589838475  | Up   | 1.59E-05 | 2.76E-05   | Transmembrane protein 42 OS=Acromyrmex echinatio GN=G5I_06843 PE=4 SV=1 |

|             |      |     |    |            |             |              |      |           |            |                                                                                                       |
|-------------|------|-----|----|------------|-------------|--------------|------|-----------|------------|-------------------------------------------------------------------------------------------------------|
| CCG017578.1 | 912  | 6   | 74 | 0.28269562 | 2.836526843 | 3.326804069  | Up   | 8.38E-06  | 1.48E-05   | AAEL005379-PA OS=Aedes aegypti GN=AAEL005379 PE=4 SV=1                                                |
| CCG010878.1 | 2823 | 17  | 74 | 0.25876213 | 0.91636999  | 1.824303728  | Up   | 1.93E-07  | 3.65E-07   | AAEL011292-PA OS=Aedes aegypti GN=AAEL011292 PE=4 SV=1                                                |
| CCG027075.1 | 1110 | 17  | 74 | 0.65809503 | 2.330551785 | 1.824303728  | Up   | 1.93E-07  | 3.65E-07   | AAEL010525-PA OS=Aedes aegypti GN=AAEL010525 PE=4 SV=1                                                |
| CCG027543.1 | 714  | 18  | 74 | 1.08327062 | 3.623126724 | 1.741841568  | Up   | 4.50E-07  | 8.41E-07   | -                                                                                                     |
| CCG013820.1 | 957  | 19  | 74 | 0.85310863 | 2.703147838 | 1.663839056  | Up   | 1.02E-06  | 1.88E-06   | Uncharacterized protein OS=Anopheles darlingi GN=AND_14401 PE=4 SV=1                                  |
| CCG015370.1 | 1412 | 21  | 74 | 0.63906829 | 1.832090992 | 1.519449147  | Up   | 4.65E-06  | 8.28E-06   | Putative uncharacterized protein OS=Culex quinquefasciatus GN=CpipJ_CPIJ011805 PE=4 SV=1              |
| CCG000663.1 | 1173 | 22  | 74 | 0.80591148 | 2.205381484 | 1.452334951  | Up   | 9.42E-06  | 1.65E-05   | AAEL011190-PA OS=Aedes aegypti GN=AAEL011190 PE=4 SV=1                                                |
| CCG014554.1 | 992  | 24  | 74 | 1.03959035 | 2.607774679 | 1.326804069  | Up   | 3.49E-05  | 5.91E-05   | AAEL006197-PA OS=Aedes aegypti GN=AAEL006197 PE=4 SV=1                                                |
| CCG022830.1 | 804  | 25  | 74 | 1.33612359 | 3.217552837 | 1.26791038   | Up   | 6.43E-05  | 0.00010679 | AAEL004953-PA OS=Aedes aegypti GN=AAEL004953 PE=4 SV=1                                                |
| CCG002332.1 | 2016 | 25  | 74 | 0.53285881 | 1.283190715 | 1.26791038   | Up   | 6.43E-05  | 0.0001068  | AAEL000107-PA OS=Aedes aegypti GN=AAEL000107 PE=4 SV=1                                                |
| CCG017845.1 | 327  | 28  | 74 | 3.67936565 | 7.911047343 | 1.104411647  | Up   | 0.0003387 | 0.00053734 | AAEL011433-PA OS=Aedes aegypti GN=AAEL011433 PE=4 SV=1                                                |
| CCG018649.1 | 4364 | 28  | 74 | 0.27569949 | 0.592784712 | 1.104411647  | Up   | 0.0003387 | 0.00053737 | Reverse transcriptase homolog protein OS=Chironomus thummi GN=reverse transcriptase homolog PE=4 SV=1 |
| CCG003623.1 | 723  | 121 | 74 | 7.19133871 | 3.578025562 | -1.007096668 | Down | 1.49E-06  | 2.72E-06   | AAEL012538-PA OS=Aedes aegypti GN=AAEL012538 PE=4 SV=1                                                |
| CCG022151.1 | 559  | 133 | 74 | 10.2235683 | 4.627750414 | -1.143515866 | Down | 2.15E-08  | 4.24E-08   | AAEL002524-PA OS=Aedes aegypti GN=CTL24 PE=4 SV=1                                                     |
| CCG020127.1 | 1824 | 149 | 74 | 3.51013731 | 1.418263422 | -1.307401951 | Down | 4.34E-11  | 9.35E-11   | AAEL004491-PA OS=Aedes aegypti GN=AAEL004491 PE=4 SV=1                                                |
| CCG021788.2 | 249  | 166 | 74 | 28.6464897 | 10.38920675 | -1.463272862 | Down | 3.27E-14  | 1.13E-13   | AAEL006602-PA OS=Aedes aegypti GN=AAEL006602 PE=4 SV=1                                                |

|             |      |     |    |            |             |              |      |           |            |                                                                                          |
|-------------|------|-----|----|------------|-------------|--------------|------|-----------|------------|------------------------------------------------------------------------------------------|
| CCG012218.1 | 951  | 176 | 74 | 7.95233785 | 2.720202399 | -1.547665049 | Down | 3.72E-16  | 1.39E-15   | AAEL011460-PA OS=Aedes aegypti GN=AAEL011460 PE=4 SV=1                                   |
| CCG019444.1 | 441  | 191 | 74 | 18.6104746 | 5.866014696 | -1.665662259 | Down | 3.35E-19  | 1.30E-18   | Putative uncharacterized protein OS=Culex quinquefasciatus GN=CpipJ_CPIJ005492 PE=4 SV=1 |
| CCG010766.1 | 315  | 214 | 74 | 29.1921372 | 8.212420575 | -1.829700417 | Down | 3.91E-24  | 1.58E-23   | AAEL007194-PA OS=Aedes aegypti GN=AAEL007194 PE=4 SV=1                                   |
| CCG020408.1 | 1788 | 219 | 74 | 5.26307152 | 1.446819061 | -1.86302049  | Down | 3.03E-25  | 1.24E-24   | AAEL007793-PA OS=Aedes aegypti GN=AAEL007793 PE=4 SV=1                                   |
| CCG013931.2 | 1353 | 261 | 74 | 8.28906189 | 1.911982617 | -2.116139427 | Down | 5.25E-35  | 2.27E-34   | AAEL000500-PA OS=Aedes aegypti GN=AAEL000500 PE=4 SV=1                                   |
| CCG021216.1 | 786  | 289 | 74 | 15.7993045 | 3.291237253 | -2.263159113 | Down | 7.01E-42  | 3.15E-41   | AGAP010534-PA (Fragment) OS=Anopheles gambiae GN=AGAP010534 PE=4 SV=3                    |
| CCG021525.1 | 1466 | 319 | 74 | 9.35016735 | 1.764606058 | -2.405646044 | Down | 1.66E-49  | 7.71E-49   | -                                                                                        |
| CCG024348.1 | 747  | 361 | 74 | 20.7658289 | 3.463068917 | -2.584088457 | Down | 1.47E-60  | 7.10E-60   | AAEL001306-PA OS=Aedes aegypti GN=AAEL001306 PE=4 SV=1                                   |
| CCG005975.1 | 1430 | 555 | 74 | 16.6770648 | 1.809029707 | -3.204577392 | Down | 2.21E-115 | 1.20E-114  | AAEL001307-PA OS=Aedes aegypti GN=AAEL001307 PE=4 SV=1                                   |
| CCG003309.1 | 1590 | 0   | 75 | 0.001      | 1.648975319 | 10.68735409  | Up   | 4.44E-16  | 1.66E-15   | Putative uncharacterized protein OS=Culex quinquefasciatus GN=CpipJ_CPIJ005832 PE=4 SV=1 |
| CCG014487.1 | 354  | 2   | 75 | 0.24276686 | 7.40641457  | 4.931131894  | Up   | 9.36E-05  | 0.00015373 | Putative uncharacterized protein OS=Culex quinquefasciatus GN=CpipJ_CPIJ005832 PE=4 SV=1 |
| CCG014411.1 | 810  | 2   | 75 | 0.10609811 | 3.236877479 | 4.931131894  | Up   | 9.36E-05  | 0.00015348 | Uncharacterized protein OS=Anopheles darlingi GN=AND_21799 PE=4 SV=1                     |
| CCG025928.1 | 705  | 8   | 75 | 0.48759983 | 3.718965614 | 2.931131894  | Up   | 2.19E-06  | 3.96E-06   | AAEL000666-PA OS=Aedes aegypti GN=AAEL000666 PE=4 SV=1                                   |
| CCG020038.1 | 749  | 9   | 75 | 0.51632525 | 3.500495004 | 2.761206893  | Up   | 1.09E-06  | 2.01E-06   | -                                                                                        |
| CCG005020.1 | 873  | 13  | 75 | 0.63987005 | 3.003288382 | 2.230692176  | Up   | 6.58E-08  | 1.27E-07   | AAEL014040-PA OS=Aedes aegypti GN=AAEL014040 PE=4 SV=1                                   |

|             |      |     |    |            |             |              |      |           |           |                                                                                          |
|-------------|------|-----|----|------------|-------------|--------------|------|-----------|-----------|------------------------------------------------------------------------------------------|
| CCG000425.1 | 1336 | 15  | 75 | 0.48244463 | 1.962478112 | 2.024241299  | Up   | 3.41E-08  | 6.66E-08  | FA1556A OS=Culex quinquefasciatus GN=CpipJ_CPIJ004210 PE=4 SV=1                          |
| CCG008025.1 | 404  | 16  | 75 | 1.70177167 | 6.489779104 | 1.931131894  | Up   | 5.79E-08  | 1.12E-07  | AAEL003562-PA OS=Aedes aegypti GN=AAEL003562 PE=4 SV=1                                   |
| CCG012506.1 | 729  | 17  | 75 | 1.00203771 | 3.596530532 | 1.843669053  | Up   | 1.31E-07  | 2.49E-07  | AAEL001543-PA OS=Aedes aegypti GN=AAEL001543 PE=4 SV=1                                   |
| CCG019831.2 | 1380 | 20  | 75 | 0.62274978 | 1.899906346 | 1.609203799  | Up   | 1.54E-06  | 2.80E-06  | AAEL014938-PA OS=Aedes aegypti GN=AAEL014938 PE=3 SV=1                                   |
| CCG015839.1 | 783  | 22  | 75 | 1.20732332 | 3.348493944 | 1.471700276  | Up   | 6.65E-06  | 1.18E-05  | Salivary antigen-5 related protein AG5-1 OS=Aedes albopictus PE=2 SV=1                   |
| CCG020374.1 | 1038 | 24  | 75 | 0.99351988 | 2.52588705  | 1.346169394  | Up   | 2.52E-05  | 4.31E-05  | AAEL006263-PA OS=Aedes aegypti GN=AAEL006263 PE=4 SV=1                                   |
| CCG006269.1 | 1098 | 25  | 75 | 0.97836372 | 2.387860435 | 1.287275705  | Up   | 4.67E-05  | 7.85E-05  | Putative uncharacterized protein OS=Culex quinquefasciatus GN=CpipJ_CPIJ014761 PE=4 SV=1 |
| CCG014126.1 | 778  | 125 | 75 | 6.90387767 | 3.370013828 | -1.03465239  | Down | 5.66E-07  | 1.05E-06  | Gag-Pol polyprotein OS=Schistosoma japonicum PE=4 SV=1                                   |
| CCG019578.1 | 1444 | 128 | 75 | 3.80895154 | 1.815699971 | -1.068868106 | Down | 2.00E-07  | 3.78E-07  | Pof-like protein OS=Culex quinquefasciatus GN=CpipJ_CPIJ012062 PE=4 SV=1                 |
| CCG012347.1 | 657  | 223 | 75 | 14.5848566 | 3.990670864 | -1.869768006 | Down | 8.50E-26  | 3.48E-25  | AAEL000457-PA OS=Aedes aegypti GN=AAEL000457 PE=4 SV=1                                   |
| CCG005163.1 | 1551 | 289 | 75 | 8.00661077 | 1.690438915 | -2.243793788 | Down | 1.89E-41  | 8.47E-41  | AAEL001737-PA (Fragment) OS=Aedes aegypti GN=AAEL001737 PE=4 SV=1                        |
| CCG025788.1 | 1331 | 778 | 75 | 25.1167945 | 1.969850306 | -3.672494451 | Down | 5.67E-182 | 3.33E-181 | AAEL009480-PA OS=Aedes aegypti GN=AAEL009480 PE=4 SV=1                                   |
| CCG023922.1 | 861  | 836 | 75 | 41.7220652 | 3.04514606  | -3.776227238 | Down | 6.22E-200 | 3.71E-199 | AAEL012650-PA OS=Aedes aegypti GN=AAEL012650 PE=4 SV=1                                   |
| CCG009456.1 | 513  | 0   | 76 | 0.001      | 5.179003966 | 12.33845895  | Up   | 4.44E-16  | 1.63E-15  | -                                                                                        |
| CCG025027.1 | 588  | 0   | 76 | 0.001      | 4.518416726 | 12.14160162  | Up   | 4.44E-16  | 1.63E-15  | AAEL015271-PA OS=Aedes aegypti GN=AAEL015271 PE=3 SV=1                                   |

|             |      |      |    |            |             |              |      |           |            |                                                                                          |
|-------------|------|------|----|------------|-------------|--------------|------|-----------|------------|------------------------------------------------------------------------------------------|
| CCG008345.2 | 921  | 9    | 76 | 0.41989969 | 2.884722079 | 2.780315716  | Up   | 1.09E-06  | 2.01E-06   | AAEL002945-PA OS=Aedes aegypti GN=AAEL002945 PE=4 SV=2                                   |
| CCG011462.1 | 2559 | 13   | 76 | 0.21829095 | 1.0382294   | 2.249800999  | Up   | 6.49E-08  | 1.25E-07   | AAEL010851-PA OS=Aedes aegypti GN=AAEL010851 PE=4 SV=1                                   |
| CCG007491.1 | 822  | 13   | 76 | 0.67957001 | 3.23215211  | 2.249800999  | Up   | 6.49E-08  | 1.25E-07   | -                                                                                        |
| CCG025810.1 | 602  | 30   | 76 | 2.1413489  | 4.413337267 | 1.043350122  | Up   | 0.0005216 | 0.00081859 | Putative uncharacterized protein OS=Culex quinquefasciatus GN=CpipJ_CPIJ001634 PE=4 SV=1 |
| CCG004834.1 | 2595 | 152  | 76 | 2.51691702 | 1.023826218 | -1.297686796 | Down | 3.60E-11  | 7.81E-11   | AAEL010111-PA OS=Aedes aegypti GN=AAEL010111 PE=4 SV=1                                   |
| CCG025777.1 | 1467 | 168  | 76 | 4.9208694  | 1.811062737 | -1.442076706 | Down | 4.38E-14  | 1.49E-13   | AAEL002547-PA OS=Aedes aegypti GN=AAEL002547 PE=4 SV=1                                   |
| CCG000758.1 | 3284 | 178  | 76 | 2.32905382 | 0.80902224  | -1.525492714 | Down | 5.22E-16  | 1.91E-15   | Putative uncharacterized protein OS=Culex quinquefasciatus GN=CpipJ_CPIJ012060 PE=4 SV=1 |
| CCG002256.1 | 996  | 197  | 76 | 8.49903385 | 2.667499031 | -1.671811102 | Down | 7.46E-20  | 2.91E-19   | AAEL008108-PA OS=Aedes aegypti GN=AAEL008108 PE=4 SV=1                                   |
| CCG017846.1 | 591  | 274  | 76 | 19.9216705 | 4.4954806   | -2.147791366 | Down | 2.40E-37  | 1.06E-36   | AAEL011439-PA OS=Aedes aegypti GN=AAEL011439 PE=4 SV=1                                   |
| CCG011867.1 | 2247 | 297  | 76 | 5.67957774 | 1.182389424 | -2.264078404 | Down | 5.14E-43  | 2.32E-42   | AAEL011366-PA OS=Aedes aegypti GN=AAEL011366 PE=4 SV=1                                   |
| CCG003934.1 | 1473 | 363  | 76 | 10.5892829 | 1.803685699 | -2.553585021 | Down | 4.43E-60  | 2.14E-59   | AAEL013039-PA OS=Aedes aegypti GN=AAEL013039 PE=4 SV=1                                   |
| CCG003566.1 | 1353 | 689  | 76 | 21.881853  | 1.963657823 | -3.478119455 | Down | 5.35E-154 | 3.05E-153  | AAEL001307-PA OS=Aedes aegypti GN=AAEL001307 PE=4 SV=1                                   |
| CCG012255.1 | 465  | 2913 | 76 | 269.184596 | 5.713610827 | -5.558049269 | Down | 0         | 0          | AAEL014419-PA OS=Aedes aegypti GN=AAEL014419 PE=4 SV=1                                   |
| CCG007674.1 | 519  | 0    | 77 | 0.001      | 5.186488076 | 12.34054226  | Up   | 4.44E-16  | 1.64E-15   | -                                                                                        |
| CCG011919.1 | 7555 | 2    | 77 | 0.01137518 | 0.356292166 | 4.969099745  | Up   | 9.36E-05  | 0.00015333 | -                                                                                        |
| CCG008537.1 | 1333 | 4    | 77 | 0.12894144 | 2.01934532  | 3.969099745  | Up   | 2.95E-05  | 5.02E-05   | -                                                                                        |
| CCG021509.1 | 810  | 5    | 77 | 0.26524528 | 3.323194212 | 3.64717165   | Up   | 1.59E-05  | 2.76E-05   | Senné proteinase stubble OS=Culex quinquefasciatus GN=CpipJ_CPIJ009890 PE=3 SV=1         |
| CCG005018.1 | 845  | 10   | 77 | 0.50851757 | 3.185547114 | 2.64717165   | Up   | 5.43E-07  | 1.01E-06   | -                                                                                        |

|             |      |      |    |            |             |              |      |           |            |                                                                                          |
|-------------|------|------|----|------------|-------------|--------------|------|-----------|------------|------------------------------------------------------------------------------------------|
| CCG010769.1 | 342  | 11   | 77 | 1.38206749 | 7.870723133 | 2.509668126  | Up   | 2.67E-07  | 5.03E-07   | AAEL007543-PA OS=Aedes aegypti GN=AAEL007543 PE=4 SV=1                                   |
| CCG028301.1 | 345  | 12   | 77 | 1.49459946 | 7.802282062 | 2.384137244  | Up   | 1.31E-07  | 2.49E-07   | AAEL008038-PA OS=Aedes aegypti GN=AAEL008038 PE=4 SV=1                                   |
| CCG017886.1 | 247  | 12   | 77 | 2.08759844 | 10.89792434 | 2.384137244  | Up   | 1.31E-07  | 2.49E-07   | Ahr1 hydrocarbon receptor nuclear translocator OS=Daphnia magna GN=DmagArnt1 PE=2 SV=1   |
| CCG002928.1 | 306  | 13   | 77 | 1.8255116  | 8.79669056  | 2.268660026  | Up   | 6.44E-08  | 1.24E-07   | AAEL000315-PA OS=Aedes aegypti GN=AAEL000315 PE=4 SV=1                                   |
| CCG025541.1 | 2883 | 15   | 77 | 0.22356782 | 0.933675793 | 2.062209149  | Up   | 2.31E-08  | 4.54E-08   | Uncharacterized protein OS=Danio rerio GN=LOC100537316 PE=4 SV=1                         |
| CCG024169.1 | 428  | 16   | 77 | 1.60634522 | 6.28922269  | 1.969099745  | Up   | 2.94E-08  | 5.77E-08   | Putative uncharacterized protein OS=Culex quinquefasciatus GN=CpipJ_CPIJ001644 PE=4 SV=1 |
| CCG012037.1 | 270  | 17   | 77 | 2.70550181 | 9.969582635 | 1.881636903  | Up   | 6.04E-08  | 1.17E-07   | AAEL010350-PA OS=Aedes aegypti GN=AAEL010350 PE=4 SV=1                                   |
| CCG001731.1 | 778  | 18   | 77 | 0.99415838 | 3.459880863 | 1.799174743  | Up   | 1.41E-07  | 2.68E-07   | -                                                                                        |
| CCG018241.1 | 1434 | 26   | 77 | 0.77908863 | 1.877118069 | 1.268660026  | Up   | 4.50E-05  | 7.57E-05   | AAEL001391-PA OS=Aedes aegypti GN=AAEL001391 PE=4 SV=1                                   |
| CCG011916.1 | 1105 | 31   | 77 | 1.20548577 | 2.436006617 | 1.014903434  | Up   | 0.0006389 | 0.00099237 | AAEL010261-PA OS=Aedes aegypti GN=AAEL010261 PE=4 SV=1                                   |
| CCG010387.1 | 1086 | 155  | 77 | 6.13288109 | 2.478625517 | -1.307024661 | Down | 1.79E-11  | 3.93E-11   | Uncharacterized protein OS=Anopheles darlingi GN=AND_22349 PE=4 SV=1                     |
| CCG004548.1 | 330  | 167  | 77 | 21.7452899 | 8.156931247 | -1.414604548 | Down | 1.20E-13  | 3.68E-13   | AAEL011718-PA OS=Aedes aegypti GN=AAEL011718 PE=4 SV=1                                   |
| CCG009199.1 | 1525 | 178  | 77 | 5.01548378 | 1.765106434 | -1.506633686 | Down | 9.63E-16  | 3.51E-15   | AAEL010344-PA OS=Aedes aegypti GN=AAEL010344 PE=4 SV=1                                   |
| CCG007746.1 | 1491 | 228  | 77 | 6.57082461 | 1.805357016 | -1.86379027  | Down | 3.13E-26  | 1.29E-25   | AAEL000044-PA OS=Aedes aegypti GN=CYP325Q1 PE=3 SV=1                                     |
| CCG020135.1 | 480  | 278  | 77 | 24.886638  | 5.607890232 | -2.149841328 | Down | 6.52E-38  | 2.88E-37   | -                                                                                        |
| CCG006464.1 | 375  | 681  | 77 | 78.0330381 | 7.178099497 | -3.442411243 | Down | 7.68E-151 | 4.36E-150  | -                                                                                        |
| CCG008900.1 | 1278 | 1359 | 77 | 45.6931685 | 2.106249852 | -4.439229996 | Down | 0         | 0          | AAEL000797-PA OS=Aedes aegypti GN=AAEL000797 PE=4 SV=1                                   |



|             |      |     |    |            |             |              |      |          |            |                                                                                          |
|-------------|------|-----|----|------------|-------------|--------------|------|----------|------------|------------------------------------------------------------------------------------------|
| CCG024135.1 | 705  | 0   | 78 | 0.001      | 3.867724239 | 11.91726922  | Up   | 4.44E-16 | 1.65E-15   | AAEL006460-PA OS=Aedes aegypti GN=AAEL006460 PE=4 SV=1                                   |
| CCG006932.1 | 885  | 0   | 78 | 0.001      | 3.081068461 | 11.58921502  | Up   | 4.44E-16 | 1.64E-15   | AAEL008197-PA OS=Aedes aegypti GN=AAEL008197 PE=3 SV=1                                   |
| CCG005309.1 | 342  | 2   | 78 | 0.251285   | 7.972940316 | 4.987715423  | Up   | 9.36E-05 | 0.00015356 | -                                                                                        |
| CCG016796.1 | 4693 | 3   | 78 | 0.0274684  | 0.581023991 | 4.402752922  | Up   | 5.28E-05 | 8.83E-05   | -                                                                                        |
| CCG011572.1 | 886  | 4   | 78 | 0.19399429 | 3.077590957 | 3.987715423  | Up   | 2.95E-05 | 5.03E-05   | AAEL006220-PA OS=Aedes aegypti GN=AAEL006220 PE=4 SV=1                                   |
| CCG025755.1 | 917  | 4   | 78 | 0.18743614 | 2.97355026  | 3.987715423  | Up   | 2.95E-05 | 5.03E-05   | AAEL011846-PA OS=Aedes aegypti GN=AAEL011846 PE=4 SV=1                                   |
| CCG005785.1 | 1356 | 6   | 78 | 0.19013157 | 2.010874328 | 3.402752922  | Up   | 8.38E-06 | 1.48E-05   | Aryl hydrocarbon binding protein OS=Culex quinquefasciatus GN=CpipJ_CPIJ007210 PE=4 SV=1 |
| CCG026450.1 | 518  | 11  | 78 | 0.91248471 | 5.263987622 | 2.528283804  | Up   | 2.67E-07 | 5.03E-07   | AAEL003190-PA OS=Aedes aegypti GN=AAEL003190 PE=4 SV=1                                   |
| CCG017557.1 | 1287 | 11  | 78 | 0.36726269 | 2.118683441 | 2.528283804  | Up   | 2.67E-07 | 5.03E-07   | AAEL008914-PA OS=Aedes aegypti GN=AAEL008914 PE=4 SV=1                                   |
| CCG001574.1 | 213  | 15  | 78 | 3.02603765 | 12.80162248 | 2.080824827  | Up   | 2.02E-08 | 3.98E-08   | AAEL001369-PA OS=Aedes aegypti GN=AAEL001369 PE=4 SV=1                                   |
| CCG022636.1 | 5505 | 18  | 78 | 0.14050049 | 0.495321633 | 1.817790421  | Up   | 9.54E-08 | 1.83E-07   | Putative uncharacterized protein OS=Culex quinquefasciatus GN=CpipJ_CPIJ015717 PE=4 SV=1 |
| CCG028000.5 | 1929 | 18  | 78 | 0.40096175 | 1.41355396  | 1.817790421  | Up   | 9.54E-08 | 1.83E-07   | Heat shock 70 Ca OS=Aedes aegypti GN=Hsp70Ca PE=3 SV=1                                   |
| CCG023149.1 | 2115 | 22  | 78 | 0.44696651 | 1.289241413 | 1.528283804  | Up   | 2.31E-06 | 4.17E-06   | AAEL003580-PA OS=Aedes aegypti GN=CYP4H28 PE=3 SV=2                                      |
| CCG022784.1 | 1776 | 23  | 78 | 0.55647742 | 1.535329723 | 1.464153467  | Up   | 4.69E-06 | 8.35E-06   | Tel1 (Fragment) OS=Drosophila virilis GN=Tel1 PE=4 SV=1                                  |
| CCG000053.1 | 483  | 133 | 78 | 11.8322458 | 5.645436    | -1.067567013 | Down | 1.19E-07 | 2.28E-07   | AAEL014888-PA OS=Aedes aegypti GN=AAEL014888 PE=4 SV=1                                   |
| CCG010163.1 | 1176 | 134 | 78 | 4.89621126 | 2.318661214 | -1.078373768 | Down | 8.37E-08 | 1.61E-07   | AAEL008321-PA OS=Aedes aegypti GN=AAEL008321 PE=4 SV=1                                   |
| CCG012096.1 | 1848 | 135 | 78 | 3.13902282 | 1.475511682 | -1.089100174 | Down | 5.87E-08 | 1.14E-07   | Transporter OS=Aedes aegypti GN=AAEL010106 PE=3 SV=1                                     |
| CCG010414.1 | 1350 | 235 | 78 | 7.47991677 | 2.019811547 | -1.888801524 | Down | 1.86E-27 | 7.71E-27   | -                                                                                        |

|             |      |      |    |            |             |              |      |           |            |                                                                                       |
|-------------|------|------|----|------------|-------------|--------------|------|-----------|------------|---------------------------------------------------------------------------------------|
| CCG003262.1 | 735  | 241  | 78 | 14.089396  | 3.709857943 | -1.925173914 | Down | 8.16E-29  | 3.42E-28   | AAEL001483-PA OS=Aedes aegypti GN=AAEL001483 PE=4 SV=1                                |
| CCG019363.1 | 1791 | 261  | 78 | 6.26192112 | 1.522471015 | -2.040190574 | Down | 1.89E-33  | 8.11E-33   | AAEL005200-PA (Fragment) OS=Aedes aegypti GN=AAEL005200 PE=4 SV=2                     |
| CCG008323.1 | 879  | 323  | 78 | 15.7897887 | 3.102099645 | -2.347674932 | Down | 1.07E-48  | 4.98E-48   | Synapsin OS=Culex quinquefasciatus GN=CpipJ_CPIJ003281 PE=4 SV=1                      |
| CCG018929.1 | 1314 | 393  | 78 | 12.8516786 | 2.075148849 | -2.63067008  | Down | 4.25E-67  | 2.09E-66   | Cytochrome P450 OS=Aedes aegypti PE=2 SV=1                                            |
| CCG008194.1 | 873  | 970  | 78 | 47.7441496 | 3.123419918 | -3.934125514 | Down | 2.56E-239 | 1.57E-238  | AAEL004251-PA OS=Aedes aegypti GN=AAEL004251 PE=4 SV=1                                |
| CCG014484.1 | 7615 | 1037 | 78 | 5.85155808 | 0.358075586 | -4.030484756 | Down | 1.81E-260 | 1.12E-259  | BEL12_AG transposon polyprotein OS=Anopheles gambiae GN=BEL12-AG transposon PE=4 SV=1 |
| CCG021210.1 | 573  | 0    | 79 | 0.001      | 4.819727513 | 12.23473587  | Up   | 4.44E-16  | 1.64E-15   | AAEL004817-PA OS=Aedes aegypti GN=AAEL004817 PE=4 SV=1                                |
| CCG012830.1 | 1298 | 1    | 79 | 0.03310457 | 2.127660913 | 6.006093952  | Up   | 0.000587  | 0.00091558 | AAEL003526-PA OS=Aedes aegypti GN=AAEL003526 PE=4 SV=1                                |
| CCG008625.1 | 822  | 3    | 79 | 0.15682385 | 3.359737062 | 4.421131451  | Up   | 5.28E-05  | 8.85E-05   | AAEL014554-PA OS=Aedes aegypti GN=AAEL014554 PE=4 SV=1                                |
| CCG007228.1 | 1452 | 5    | 79 | 0.14796741 | 1.901999907 | 3.684165857  | Up   | 1.59E-05  | 2.76E-05   | Putative pol-like protein OS=Danaus plexippus GN=KGM_11377 PE=4 SV=1                  |
| CCG003611.1 | 1658 | 6    | 79 | 0.15549964 | 1.665683875 | 3.421131451  | Up   | 8.38E-06  | 1.48E-05   | AAEL010790-PA OS=Aedes aegypti GN=AAEL010790 PE=4 SV=1                                |
| CCG021157.1 | 462  | 6    | 79 | 0.5580485  | 5.977713994 | 3.421131451  | Up   | 8.38E-06  | 1.47E-05   | -                                                                                     |
| CCG025890.1 | 321  | 17   | 79 | 2.27565573 | 8.603438832 | 1.918631111  | Up   | 2.87E-08  | 5.64E-08   | AAEL010637-PA OS=Aedes aegypti GN=AAEL010637 PE=4 SV=1                                |
| CCG018744.1 | 1332 | 23   | 79 | 0.74196989 | 2.07335125  | 1.482531996  | Up   | 3.31E-06  | 5.94E-06   | AAEL001787-PA OS=Aedes aegypti GN=AAEL001787 PE=4 SV=1                                |
| CCG005449.1 | 1098 | 25   | 79 | 0.97836372 | 2.515212992 | 1.362237762  | Up   | 1.27E-05  | 2.21E-05   | AAEL011071-PA OS=Aedes aegypti GN=AAEL011071 PE=4 SV=1                                |

|             |      |      |    |            |             |              |      |           |            |                                                                                                   |
|-------------|------|------|----|------------|-------------|--------------|------|-----------|------------|---------------------------------------------------------------------------------------------------|
| CCG014701.1 | 798  | 29   | 79 | 1.56155677 | 3.460781786 | 1.148112957  | Up   | 0.0001323 | 0.00021489 | Putative uncharacterized protein<br>OS=Culex quinquefasciatus<br>GN=CpipJ_CPIJ018760 PE=4<br>SV=1 |
| CCG009772.1 | 501  | 32   | 79 | 2.74457387 | 5.512382964 | 1.006093952  | Up   | 0.000593  | 0.00092322 | Putative uncharacterized protein<br>OS=Culex quinquefasciatus<br>GN=CpipJ_CPIJ007337 PE=4<br>SV=1 |
| CCG027636.1 | 369  | 135  | 79 | 15.7206346 | 7.484292317 | -1.070721645 | Down | 8.91E-08  | 1.71E-07   | AAEL011837-PA OS=Aedes<br>aegypti GN=AAEL011837 PE=4<br>SV=1                                      |
| CCG026143.1 | 5265 | 174  | 79 | 1.4200824  | 0.524540145 | -1.436849544 | Down | 1.83E-14  | 6.43E-14   | AAEL003307-PA (Fragment)<br>OS=Aedes aegypti<br>GN=AAEL003307 PE=4 SV=1                           |
| CCG023765.1 | 549  | 205  | 79 | 16.045165  | 5.030425984 | -1.673386148 | Down | 1.27E-20  | 4.98E-20   | -                                                                                                 |
| CCG016612.1 | 2031 | 230  | 79 | 4.86609501 | 1.359775414 | -1.839396099 | Down | 5.33E-26  | 2.18E-25   | Beta-galactosidase OS=Aedes<br>aegypti GN=AAEL004580 PE=3<br>SV=1                                 |
| CCG014342.1 | 741  | 233  | 79 | 13.511401  | 3.726995769 | -1.858092193 | Down | 1.15E-26  | 4.74E-26   | AAEL005770-PA OS=Aedes<br>aegypti GN=AAEL005770 PE=4<br>SV=1                                      |
| CCG010111.1 | 2646 | 385  | 79 | 6.25221006 | 1.04372784  | -2.582620684 | Down | 1.97E-64  | 9.62E-64   | AAEL012077-PA (Fragment)<br>OS=Aedes aegypti<br>GN=AAEL012077 PE=3 SV=1                           |
| CCG021359.1 | 1122 | 1563 | 79 | 59.8589084 | 2.461411644 | -4.604008111 | Down | 0         | 0          | AAEL011771-PA OS=Aedes<br>aegypti GN=AAEL011771 PE=4<br>SV=1                                      |
| CCG014652.1 | 285  | 3090 | 79 | 465.882386 | 9.690189    | -5.587297171 | Down | 0         | 0          | Putative uncharacterized protein<br>OS=Culex quinquefasciatus<br>GN=CpipJ_CPIJ019849 PE=4<br>SV=1 |
| CCG007675.1 | 648  | 0    | 80 | 0.001      | 4.315836639 | 12.07542454  | Up   | 4.44E-16  | 1.65E-15   | AAEL011890-PA OS=Aedes<br>aegypti GN=AAEL011890 PE=4<br>SV=1                                      |
| CCG018430.1 | 402  | 1    | 80 | 0.10688989 | 6.956870999 | 6.024241299  | Up   | 0.000587  | 0.00091689 | AAEL006551-PA OS=Aedes<br>aegypti GN=AAEL006551 PE=4<br>SV=1                                      |
| CCG018012.1 | 645  | 5    | 80 | 0.33309872 | 4.335910297 | 3.702313204  | Up   | 1.59E-05  | 2.76E-05   | AAEL001477-PA OS=Aedes<br>aegypti GN=AAEL001477 PE=4<br>SV=1                                      |
| CCG017373.1 | 606  | 10   | 80 | 0.70907153 | 4.614954029 | 2.702313204  | Up   | 5.43E-07  | 1.01E-06   | AAEL010423-PA OS=Aedes<br>aegypti GN=AAEL010423 PE=4<br>SV=1                                      |
| CCG019506.1 | 1771 | 11   | 80 | 0.26689276 | 1.579142937 | 2.56480968   | Up   | 2.67E-07  | 5.03E-07   | AAEL006034-PA OS=Aedes<br>aegypti GN=AAEL006034 PE=4<br>SV=1                                      |

|             |      |     |    |            |             |              |      |          |            |                                                                                          |
|-------------|------|-----|----|------------|-------------|--------------|------|----------|------------|------------------------------------------------------------------------------------------|
| CCG013401.1 | 252  | 15  | 80 | 2.5577223  | 11.09786564 | 2.117350703  | Up   | 1.71E-08 | 3.37E-08   | AAEL004408-PA OS=Aedes aegypti GN=AAEL004408 PE=4 SV=1                                   |
| CCG023351.2 | 627  | 16  | 80 | 1.09651635 | 4.460386191 | 2.024241299  | Up   | 1.35E-08 | 2.68E-08   | AAEL012899-PA OS=Aedes aegypti GN=AAEL012899 PE=4 SV=1                                   |
| CCG011567.1 | 1839 | 18  | 80 | 0.42058468 | 1.520751572 | 1.854316297  | Up   | 4.40E-08 | 8.56E-08   | AAEL000050-PA OS=Aedes aegypti GN=AAEL006050 PE=4 SV=1                                   |
| CCG013925.1 | 414  | 20  | 80 | 2.07583259 | 6.755222565 | 1.702313204  | Up   | 2.36E-07 | 4.46E-07   | AAEL000050-PA OS=Aedes aegypti GN=AAEL000503 PE=4 SV=1                                   |
| CCG014388.1 | 1344 | 27  | 80 | 0.86323128 | 2.080849808 | 1.269353797  | Up   | 3.15E-05 | 5.35E-05   | AAEL000050-PA OS=Aedes aegypti GN=AAEL006556 PE=4 SV=1                                   |
| CCG025518.1 | 1497 | 134 | 80 | 3.84632227 | 1.868177783 | -1.041847892 | Down | 1.89E-07 | 3.59E-07   | AAEL009892-PA OS=Aedes aegypti GN=AAEL009892 PE=4 SV=1                                   |
| CCG017652.1 | 1443 | 149 | 80 | 4.43693032 | 1.938088802 | -1.194927222 | Down | 8.23E-10 | 1.70E-09   | AAEL014965-PA OS=Aedes aegypti GN=AAEL014965 PE=4 SV=1                                   |
| CCG015644.1 | 858  | 218 | 80 | 10.9177181 | 3.259512986 | -1.743943026 | Down | 4.61E-23 | 1.85E-22   | AAEL010102-PA OS=Aedes aegypti GN=AAEL010102 PE=4 SV=1                                   |
| CCG013923.1 | 402  | 240 | 80 | 25.6535729 | 6.956870999 | -1.882649297 | Down | 6.87E-28 | 2.85E-27   | Putative uncharacterized protein OS=Culex quinquefasciatus GN=CpipJ_CPIJ012173 PE=4 SV=1 |
| CCG014186.1 | 507  | 0   | 81 | 0.001      | 5.585050135 | 12.44735452  | Up   | 4.44E-16 | 1.65E-15   | AAEL014453-PA OS=Aedes aegypti GN=AAEL014453 PE=4 SV=1                                   |
| CCG003434.1 | 764  | 0   | 81 | 0.001      | 3.706309448 | 11.85576763  | Up   | 4.44E-16 | 1.64E-15   | -                                                                                        |
| CCG027414.1 | 885  | 0   | 81 | 0.001      | 3.199571094 | 11.64366281  | Up   | 4.44E-16 | 1.63E-15   | AAEL000713-PA OS=Aedes aegypti GN=AAEL000713 PE=4 SV=1                                   |
| CCG019835.1 | 810  | 1   | 81 | 0.05304906 | 3.495827677 | 6.042163207  | Up   | 0.000587 | 0.00091814 | Putative uncharacterized protein OS=Culex quinquefasciatus GN=CpipJ_CPIJ014520 PE=3 SV=1 |
| CCG014989.1 | 373  | 3   | 81 | 0.34560108 | 7.591475653 | 4.457200706  | Up   | 5.28E-05 | 8.83E-05   | AGAP007322-PA OS=Anopheles gambiae GN=AGAP007322 PE=4 SV=1                               |
| CCG026035.1 | 723  | 4   | 81 | 0.23773021 | 3.916487439 | 4.042163207  | Up   | 2.95E-05 | 5.04E-05   | AAEL000379-PA OS=Aedes aegypti GN=AAEL005379 PE=4 SV=1                                   |
| CCG014496.1 | 300  | 5   | 81 | 0.71616224 | 9.438734729 | 3.720235112  | Up   | 1.59E-05 | 2.76E-05   | AAEL000331-PA OS=Aedes aegypti GN=AAEL006331 PE=4 SV=1                                   |

|             |      |     |    |            |             |              |      |           |            |                                                                                          |
|-------------|------|-----|----|------------|-------------|--------------|------|-----------|------------|------------------------------------------------------------------------------------------|
| CCG023128.1 | 1515 | 7   | 81 | 0.19854003 | 1.869056382 | 3.234808285  | Up   | 4.31E-06  | 7.70E-06   | AAEL015347-PA OS=Aedes aegypti GN=AAEL015347 PE=4 SV=1                                   |
| CCG026174.1 | 3306 | 8   | 81 | 0.10398    | 0.856509503 | 3.042163207  | Up   | 2.19E-06  | 3.97E-06   | Guanylate cyclase OS=Culex quinquefasciatus GN=CpipJ_CPIJ009261 PE=3 SV=1                |
| CCG005457.1 | 1632 | 9   | 81 | 0.23696545 | 1.735061531 | 2.872238205  | Up   | 1.09E-06  | 2.01E-06   | AAEL005335-PA (Fragment) OS=Aedes aegypti GN=AAEL005335 PE=4 SV=1                        |
| CCG024564.1 | 864  | 13  | 81 | 0.64653536 | 3.277338447 | 2.341723489  | Up   | 6.36E-08  | 1.23E-07   | Tensin OS=Culex quinquefasciatus GN=CpipJ_CPIJ005796 PE=4 SV=1                           |
| CCG002921.1 | 399  | 14  | 81 | 1.50770999 | 7.096793029 | 2.234808285  | Up   | 3.12E-08  | 6.10E-08   | AAEL002461-PA OS=Aedes aegypti GN=AAEL002461 PE=4 SV=1                                   |
| CCG015593.1 | 2220 | 24  | 81 | 0.46453767 | 1.275504693 | 1.457200706  | Up   | 3.31E-06  | 5.94E-06   | AAEL003726-PA OS=Aedes aegypti GN=AAEL003726 PE=4 SV=1                                   |
| CCG016345.1 | 462  | 25  | 81 | 2.32520209 | 6.129048525 | 1.398307017  | Up   | 6.50E-06  | 1.15E-05   | AAEL006168-PA OS=Aedes aegypti GN=CLIPB42 PE=4 SV=1                                      |
| CCG021585.1 | 654  | 30  | 81 | 1.97108874 | 4.32969483  | 1.135272611  | Up   | 0.0001248 | 0.00020283 | AAEL002836-PA (Fragment) OS=Aedes aegypti GN=AAEL002836 PE=4 SV=1                        |
| CCG002674.1 | 1445 | 32  | 81 | 0.9515789  | 1.959598906 | 1.042163207  | Up   | 0.0003429 | 0.00054388 | AAEL011199-PA OS=Aedes aegypti GN=AAEL011199 PE=4 SV=1                                   |
| CCG017701.1 | 1812 | 142 | 81 | 3.36738538 | 1.562704425 | -1.107583913 | Down | 1.72E-08  | 3.39E-08   | Putative uncharacterized protein OS=Culex quinquefasciatus GN=CpipJ_CPIJ007371 PE=4 SV=1 |
| CCG027312.1 | 777  | 157 | 81 | 8.68243029 | 3.644299123 | -1.252457542 | Down | 6.03E-11  | 1.30E-10   | AAEL004126-PA OS=Aedes aegypti GN=AAEL004126 PE=4 SV=1                                   |
| CCG001472.1 | 315  | 169 | 81 | 23.0536036 | 8.98927117  | -1.35871623  | Down | 4.67E-13  | 1.22E-12   | AGAP007867-PA (Fragment) OS=Anopheles gambiae GN=AGAP007867 PE=4 SV=3                    |
| CCG027424.1 | 855  | 182 | 81 | 9.14677392 | 3.311836747 | -1.465631433 | Down | 1.79E-15  | 6.50E-15   | CD109 antigen OS=Culex quinquefasciatus GN=CpipJ_CPIJ020143 PE=4 SV=1                    |
| CCG022403.1 | 843  | 184 | 81 | 9.37892191 | 3.35898033  | -1.481398749 | Down | 7.42E-16  | 2.71E-15   | AAEL013324-PA OS=Aedes aegypti GN=AAEL013324 PE=4 SV=1                                   |

|             |      |     |    |            |             |              |      |           |           |                                                                      |
|-------------|------|-----|----|------------|-------------|--------------|------|-----------|-----------|----------------------------------------------------------------------|
| CCG004543.1 | 549  | 187 | 81 | 14.6363213 | 5.15777854  | -1.504731253 | Down | 1.96E-16  | 7.34E-16  | AAEL000455-PA OS=Aedes aegypti GN=AAEL000455 PE=4 SV=1               |
| CCG010263.1 | 1493 | 248 | 81 | 7.13763844 | 1.896597735 | -1.912033104 | Down | 2.40E-29  | 1.01E-28  | -                                                                    |
| CCG000610.1 | 603  | 268 | 81 | 19.0976598 | 4.695887925 | -2.023925984 | Down | 5.84E-34  | 2.52E-33  | AAEL012400-PA OS=Aedes aegypti GN=AAEL012400 PE=4 SV=1               |
| CCG024008.1 | 2094 | 282 | 81 | 5.78675509 | 1.352254259 | -2.097388146 | Down | 2.81E-37  | 1.23E-36  | AAEL000427-PA OS=Aedes aegypti GN=AAEL000427 PE=4 SV=1               |
| CCG014356.1 | 1527 | 283 | 81 | 7.96361159 | 1.854368316 | -2.102495036 | Down | 1.62E-37  | 7.12E-37  | AAEL003966-PA OS=Aedes aegypti GN=AAEL003966 PE=4 SV=1               |
| CCG015472.1 | 516  | 310 | 81 | 25.8151506 | 5.48763647  | -2.233961199 | Down | 4.16E-44  | 1.89E-43  | -                                                                    |
| CCG012915.1 | 1260 | 328 | 81 | 11.1857722 | 2.247317793 | -2.315388798 | Down | 1.28E-48  | 5.94E-48  | AAEL005296-PA OS=Aedes aegypti GN=AAEL005296 PE=4 SV=1               |
| CCG028536.2 | 2050 | 371 | 81 | 7.77647392 | 1.381278253 | -2.49311217  | Down | 1.02E-59  | 4.89E-59  | AAEL004544-PA OS=Aedes aegypti GN=AAEL004544 PE=4 SV=1               |
| CCG009022.2 | 1911 | 512 | 81 | 11.512561  | 1.481747995 | -2.957836793 | Down | 1.78E-98  | 9.42E-98  | Transporter OS=Aedes aegypti GN=NAT8 PE=2 SV=1                       |
| CCG013258.1 | 1611 | 747 | 81 | 19.9245138 | 1.75767872  | -3.502801226 | Down | 7.47E-168 | 4.33E-167 | AAEL001233-PA OS=Aedes aegypti GN=CLYPE9 PE=3 SV=2                   |
| CCG013745.1 | 7683 | 928 | 81 | 5.19014886 | 0.368556608 | -3.815817788 | Down | 1.32E-223 | 8.01E-223 | AAEL000307-PA (Fragment) OS=Aedes aegypti GN=AAEL000307 PE=4 SV=1    |
| CCG010923.1 | 852  | 3   | 82 | 0.15130188 | 3.364528985 | 4.474902708  | Up   | 5.28E-05  | 8.85E-05  | Osims OS=Culex quinquefasciatus GN=CpipJ_CPIJ008140 PE=4 SV=1        |
| CCG020174.1 | 387  | 4   | 82 | 0.44413162 | 7.407180091 | 4.059865208  | Up   | 2.95E-05  | 5.02E-05  | -                                                                    |
| CCG027808.1 | 1050 | 6   | 82 | 0.24554134 | 2.730074948 | 3.474902708  | Up   | 8.38E-06  | 1.47E-05  | AAEL000411-PA OS=Aedes aegypti GN=AAEL000411 PE=4 SV=1               |
| CCG009228.1 | 501  | 10  | 82 | 0.85767933 | 5.721713963 | 2.737937114  | Up   | 5.43E-07  | 1.01E-06  | AAEL003000-PA OS=Aedes aegypti GN=AAEL003000 PE=2 SV=1               |
| CCG020604.1 | 606  | 11  | 82 | 0.77997868 | 4.73032788  | 2.60043359   | Up   | 2.67E-07  | 5.03E-07  | AAEL002151-PA OS=Aedes aegypti GN=AAEL002151 PE=4 SV=1               |
| CCG011444.1 | 558  | 18  | 82 | 1.38612047 | 5.137237805 | 1.889940207  | Up   | 2.06E-08  | 4.05E-08  | Uncharacterized protein OS=Anopheles darlingi GN=AND_27065 PE=4 SV=1 |
| CCG021480.1 | 456  | 18  | 82 | 1.69617373 | 6.286356788 | 1.889940207  | Up   | 2.06E-08  | 4.06E-08  | AAEL012377-PA OS=Aedes aegypti GN=AAEL012377 PE=4 SV=1               |

|             |      |      |    |            |             |              |      |           |            |                                                                     |
|-------------|------|------|----|------------|-------------|--------------|------|-----------|------------|---------------------------------------------------------------------|
| CCG026343.1 | 816  | 20   | 82 | 1.05317977 | 3.512964087 | 1.737937114  | Up   | 1.10E-07  | 2.11E-07   | AAEL009952-PA OS=Aedes aegypti GN=AAEL009952 PE=4 SV=1              |
| CCG015101.1 | 1502 | 22   | 82 | 0.6293836  | 1.908507787 | 1.60043359   | Up   | 5.43E-07  | 1.01E-06   | AAEL015428-PA OS=Aedes aegypti GN=AAEL015428 PE=4 SV=1              |
| CCG014053.1 | 252  | 164  | 82 | 27.9644305 | 11.37531228 | -1.297686796 | Down | 6.13E-12  | 1.38E-11   | AAEL011157-PA OS=Aedes aegypti GN=AAEL011157 PE=4 SV=1              |
| CCG012952.1 | 1662 | 198  | 82 | 5.11913806 | 1.724776592 | -1.569491412 | Down | 2.49E-18  | 9.54E-18   | AAEL012412-PA OS=Aedes aegypti GN=AAEL012412 PE=4 SV=1              |
| CCG004692.1 | 1038 | 201  | 82 | 8.32072896 | 2.761636508 | -1.591186483 | Down | 6.22E-19  | 2.40E-18   | AAEL007106-PA OS=Aedes aegypti GN=AAEL007106 PE=3 SV=1              |
| CCG006548.1 | 279  | 325  | 82 | 50.0543504 | 10.27447561 | -2.284430699 | Down | 2.02E-47  | 9.32E-47   | -                                                                   |
| CCG007335.1 | 1850 | 647  | 82 | 15.0277937 | 1.549501997 | -3.277756694 | Down | 4.10E-137 | 2.30E-136  | AAEL001818-PA OS=Aedes aegypti GN=AAEL001818 PE=4 SV=1              |
| CCG020771.1 | 1128 | 1044 | 82 | 39.7698608 | 2.54129317  | -3.968040788 | Down | 3.88E-259 | 2.40E-258  | AAEL014045-PA OS=Aedes aegypti GN=AAEL014045 PE=4 SV=1              |
| CCG009080.1 | 1338 | 5904 | 82 | 189.606363 | 2.142435497 | -6.467611798 | Down | 0         | 0          | Beta-2 tubulin OS=Aedes aegypti GN=B2t PE=3 SV=1                    |
| CCG022346.1 | 1131 | 6280 | 82 | 238.594106 | 2.534552339 | -6.556683635 | Down | 0         | 0          | AAEL005961-PA OS=Aedes aegypti GN=AAEL005961 PE=3 SV=1              |
| CCG026009.1 | 294  | 1    | 83 | 0.14615556 | 9.869173374 | 6.077352635  | Up   | 0.000587  | 0.00091842 | Putative 8 kDa secreted peptide 8kD-2 OS=Aedes albopictus PE=4 SV=1 |
| CCG028141.1 | 267  | 5    | 83 | 0.80467668 | 10.86717967 | 3.75542454   | Up   | 1.59E-05  | 2.76E-05   | Transporter OS=Aedes aegypti GN=AAEL003624 PE=3 SV=1                |
| CCG019979.1 | 1830 | 17   | 83 | 0.3991724  | 1.585539329 | 1.989889794  | Up   | 8.27E-09  | 1.65E-08   | AAEL005592-PA OS=Aedes aegypti GN=AAEL005592 PE=4 SV=1              |
| CCG025531.1 | 638  | 20   | 83 | 1.34701362 | 4.547863593 | 1.75542454   | Up   | 7.48E-08  | 1.44E-07   | AAEL004617-PA OS=Aedes aegypti GN=AAEL004617 PE=4 SV=1              |
| CCG024165.1 | 1413 | 24   | 83 | 0.72984687 | 2.053458579 | 1.492390134  | Up   | 1.65E-06  | 3.01E-06   | AAEL004614-PA OS=Aedes aegypti GN=AAEL004614 PE=4 SV=1              |
| CCG022871.1 | 1122 | 28   | 83 | 1.07232849 | 2.586040082 | 1.269997713  | Up   | 2.21E-05  | 3.80E-05   | AAEL005950-PA OS=Aedes aegypti GN=CASPS16 PE=3 SV=1                 |
| CCG021574.1 | 1758 | 140  | 83 | 3.42193563 | 1.650476093 | -1.051930382 | Down | 7.98E-08  | 1.54E-07   | AAEL012956-PA OS=Aedes aegypti GN=AAEL012956 PE=3 SV=1              |

|             |      |     |    |            |             |              |      |          |          |                                                                                          |
|-------------|------|-----|----|------------|-------------|--------------|------|----------|----------|------------------------------------------------------------------------------------------|
| CCG006469.1 | 1086 | 143 | 83 | 5.65807739 | 2.671765168 | -1.082518702 | Down | 2.80E-08 | 5.49E-08 | AAEL011924-PA OS=Aedes aegypti GN=AAEL011924 PE=3 SV=1                                   |
| CCG007116.1 | 1605 | 145 | 83 | 3.88200095 | 1.807811198 | -1.102556455 | Down | 1.37E-08 | 2.73E-08 | AAEL005207-PA OS=Aedes aegypti GN=AAEL005207 PE=4 SV=1                                   |
| CCG002589.1 | 1932 | 149 | 83 | 3.31391846 | 1.501830731 | -1.141815885 | Down | 3.21E-09 | 6.54E-09 | AAEL005247-PA OS=Aedes aegypti GN=AAEL003247 PE=4 SV=2                                   |
| CCG008587.1 | 1311 | 154 | 83 | 5.04755082 | 2.213224235 | -1.189433906 | Down | 4.98E-10 | 1.04E-09 | GJ16356 OS=Drosophila virilis GN=GJ16356 PE=3 SV=1                                       |
| CCG013491.1 | 2206 | 165 | 83 | 3.21396474 | 1.315293278 | -1.288969579 | Down | 6.82E-12 | 1.53E-11 | AAEL014654-PA OS=Aedes aegypti GN=AAEL014654 PE=4 SV=1                                   |
| CCG006416.1 | 1593 | 236 | 83 | 6.36588661 | 1.821429361 | -1.805290414 | Down | 5.40E-26 | 2.21E-25 | AAEL014035-PA OS=Aedes aegypti GN=AAEL014035 PE=4 SV=1                                   |
| CCG006221.1 | 1431 | 238 | 83 | 7.14660855 | 2.027628911 | -1.817465128 | Down | 1.97E-26 | 8.09E-26 | AAEL011784-PA OS=Aedes aegypti GN=AAEL011784 PE=3 SV=1                                   |
| CCG004343.1 | 687  | 246 | 83 | 15.3865425 | 4.223489042 | -1.86516187  | Down | 3.33E-28 | 1.39E-27 | AGAP007127-PA OS=Anopheles gambiae GN=AGAP007127 PE=4 SV=3                               |
| CCG012815.1 | 315  | 249 | 83 | 33.9665521 | 9.211228483 | -1.882649297 | Down | 7.09E-29 | 2.97E-28 | AGAP007867-PA (Fragment) OS=Anopheles gambiae GN=AGAP007867 PE=4 SV=3                    |
| CCG025346.1 | 1611 | 301 | 83 | 8.02848549 | 1.801078195 | -2.156267042 | Down | 4.60E-41 | 2.06E-40 | AGAP001084-PA OS=Anopheles gambiae GN=AgaP_AGAP001084 PE=4 SV=5                          |
| CCG001105.1 | 4603 | 313 | 83 | 2.92190461 | 0.630357804 | -2.212666212 | Down | 5.28E-44 | 2.40E-43 | AAEL007374-PA OS=Aedes aegypti GN=AAEL007374 PE=4 SV=1                                   |
| CCG008080.1 | 1690 | 358 | 83 | 9.10246449 | 1.716885782 | -2.406463142 | Down | 2.24E-55 | 1.06E-54 | Pol polyprotein (Fragment) OS=Anopheles gambiae PE=4 SV=1                                |
| CCG017872.1 | 1722 | 488 | 83 | 12.1772535 | 1.68498082  | -2.853384702 | Down | 1.64E-90 | 8.53E-90 | Putative uncharacterized protein OS=Culex quinquefasciatus GN=CpipJ_CPIJ001797 PE=4 SV=1 |
| CCG025898.1 | 765  | 493 | 83 | 27.6916067 | 3.792858787 | -2.868091201 | Down | 6.49E-92 | 3.38E-91 | Putative uncharacterized protein OS=Culex quinquefasciatus GN=CpipJ_CPIJ005987 PE=4 SV=1 |
| CCG007454.1 | 318  | 0   | 84 | 0.001      | 9.234261789 | 13.17278092  | Up   | 4.44E-16 | 1.65E-15 | -                                                                                        |



|             |      |     |    |            |             |              |      |          |          |                                                                                           |
|-------------|------|-----|----|------------|-------------|--------------|------|----------|----------|-------------------------------------------------------------------------------------------|
| CCG015326.1 | 498  | 0   | 84 | 0.001      | 5.896576805 | 12.52566194  | Up   | 4.44E-16 | 1.63E-15 | AAEL000870-PA OS=Aedes aegypti GN=AAEL000870 PE=4 SV=1                                    |
| CCG016848.1 | 1173 | 0   | 84 | 0.001      | 2.503406009 | 11.28967657  | Up   | 4.44E-16 | 1.63E-15 | AAEL000858-PA OS=Aedes aegypti GN=AAEL008858 PE=4 SV=1                                    |
| CCG011666.1 | 822  | 3   | 84 | 0.15682385 | 3.572378648 | 4.509668126  | Up   | 5.28E-05 | 8.84E-05 | AAEL011537-PA OS=Aedes aegypti GN=AAEL011537 PE=4 SV=1                                    |
| CCG005173.1 | 528  | 5   | 84 | 0.40691037 | 5.561544032 | 3.772702532  | Up   | 1.59E-05 | 2.76E-05 | -                                                                                         |
| CCG021866.1 | 1059 | 8   | 84 | 0.32460612 | 2.772894475 | 3.094630627  | Up   | 2.19E-06 | 3.96E-06 | AAEL005438-PA OS=Aedes aegypti GN=AAEL005438 PE=4 SV=1                                    |
| CCG018074.1 | 383  | 9   | 84 | 1.00973267 | 7.667089423 | 2.924705625  | Up   | 1.09E-06 | 2.01E-06 | -                                                                                         |
| CCG019547.1 | 336  | 11  | 84 | 1.40674726 | 8.739569193 | 2.635199008  | Up   | 2.67E-07 | 5.03E-07 | Uncharacterized protein OS=Anopheles darlingi GN=AND_13030 PE=4 SV=1                      |
| CCG003727.1 | 911  | 12  | 84 | 0.56601187 | 3.223375685 | 2.509668126  | Up   | 1.30E-07 | 2.49E-07 | AAEL000891-PA OS=Aedes aegypti GN=AAEL008911 PE=4 SV=1                                    |
| CCG015701.1 | 1273 | 19  | 84 | 0.64133932 | 2.306751963 | 1.846703113  | Up   | 2.18E-08 | 4.30E-08 | AAEL010089-PA OS=Aedes aegypti GN=AAEL010089 PE=4 SV=1                                    |
| CCG010287.1 | 1625 | 28  | 84 | 0.74040158 | 1.807073999 | 1.287275705  | Up   | 1.61E-05 | 2.78E-05 | Putative uncharacterized protein (Fragment) OS=Solenopsis invicta GN=SINV_11683 PE=4 SV=1 |
| CCG024777.1 | 1440 | 28  | 84 | 0.83552262 | 2.039232812 | 1.287275705  | Up   | 1.61E-05 | 2.78E-05 | AAEL002292-PA OS=Aedes aegypti GN=AAEL002292 PE=4 SV=1                                    |
| CCG000637.1 | 471  | 30  | 84 | 2.73692577 | 6.234597131 | 1.187740031  | Up   | 5.10E-05 | 8.57E-05 | AAEL005713-PA OS=Aedes aegypti GN=AAEL005713 PE=4 SV=1                                    |
| CCG004733.1 | 1158 | 137 | 84 | 5.08363872 | 2.535833548 | -1.003401456 | Down | 3.28E-07 | 6.16E-07 | AAEL008226-PA OS=Aedes aegypti GN=AAEL008226 PE=4 SV=1                                    |
| CCG020963.1 | 421  | 154 | 84 | 15.7181452 | 6.975048097 | -1.172155914 | Down | 7.88E-10 | 1.63E-09 | AAEL008169-PA OS=Aedes aegypti GN=AAEL008169 PE=3 SV=1                                    |
| CCG009829.2 | 2892 | 163 | 84 | 2.42187647 | 1.015385632 | -1.254097528 | Down | 2.49E-11 | 5.43E-11 | AAEL007967-PA OS=Aedes aegypti GN=AAEL007967 PE=4 SV=1                                    |
| CCG004945.1 | 3561 | 175 | 84 | 2.11168311 | 0.824626579 | -1.356580485 | Down | 1.93E-13 | 5.57E-13 | AAEL001584-PA OS=Aedes aegypti GN=AAEL001584 PE=4 SV=1                                    |
| CCG002559.1 | 1050 | 179 | 84 | 7.32531666 | 2.796662142 | -1.389185151 | Down | 3.62E-14 | 1.25E-13 | AAEL007104-PA OS=Aedes aegypti GN=AAEL007104 PE=4 SV=1                                    |

|             |       |      |    |            |             |              |      |           |           |                                                                                                                     |
|-------------|-------|------|----|------------|-------------|--------------|------|-----------|-----------|---------------------------------------------------------------------------------------------------------------------|
| CCG004398.1 | 3980  | 180  | 84 | 1.94335483 | 0.737812877 | -1.39722247  | Down | 2.37E-14  | 8.26E-14  | Reverse transcriptase homolog protein OS=Chironomus thummi GN=reverse transcriptase homolog PE=4 SV=1               |
| CCG014878.1 | 2067  | 246  | 84 | 5.11395971 | 1.42065566  | -1.847883879 | Down | 7.27E-28  | 3.02E-27  | AAEL011763-PA OS=Aedes aegypti GN=PPO3 PE=4 SV=1                                                                    |
| CCG016069.1 | 1371  | 248  | 84 | 7.77278934 | 2.141863785 | -1.859565684 | Down | 2.61E-28  | 1.09E-27  | AAEL011334-PA OS=Aedes aegypti GN=AAEL011334 PE=4 SV=1                                                              |
| CCG016740.1 | 1719  | 276  | 84 | 6.8991546  | 1.708257853 | -2.01389383  | Down | 1.05E-34  | 4.53E-34  | AAEL000933-PA OS=Aedes aegypti GN=AAEL000933 PE=4 SV=1                                                              |
| CCG022033.1 | 4416  | 285  | 84 | 2.7731826  | 0.664967221 | -2.060187482 | Down | 7.97E-37  | 3.49E-36  | Leucine-rich repeat-containing G-protein coupled receptor 4 OS=Culex quinquefasciatus GN=CpipJ_CPIJ013183 PE=4 SV=1 |
| CCG020587.1 | 5370  | 355  | 84 | 2.84064354 | 0.54683338  | -2.377044588 | Down | 3.85E-54  | 1.82E-53  | Putative uncharacterized protein OS=Culex quinquefasciatus GN=CpipJ_CPIJ015383 PE=4 SV=1                            |
| CCG002675.1 | 1169  | 380  | 84 | 13.9679206 | 2.511971984 | -2.475224982 | Down | 1.27E-60  | 6.12E-60  | AAEL011200-PA OS=Aedes aegypti GN=AAEL011200 PE=4 SV=1                                                              |
| CCG020913.1 | 1851  | 1059 | 84 | 24.5839811 | 1.586437196 | -3.953856247 | Down | 4.09E-262 | 2.53E-261 | AAEL004014-PA OS=Aedes aegypti GN=AAEL004014 PE=3 SV=1                                                              |
| CCG001167.1 | 11724 | 1179 | 84 | 4.32116318 | 0.250468718 | -4.108717376 | Down | 4.00E-300 | 2.52E-299 | AAEL014313-PA OS=Aedes aegypti GN=AAEL014313 PE=4 SV=1                                                              |
| CCG010369.1 | 4110  | 2657 | 84 | 27.7787311 | 0.71447573  | -5.280951886 | Down | 0         | 0         | AAEL012794-PA OS=Aedes aegypti GN=AAEL012794 PE=4 SV=1                                                              |
| CCG015454.1 | 852   | 0    | 85 | 0.001      | 3.487621509 | 11.76802777  | Up   | 4.44E-16  | 1.63E-15  | AAEL003126-PA OS=Aedes aegypti GN=AAEL003128 PE=4 SV=1                                                              |
| CCG023233.1 | 885   | 4    | 85 | 0.19421349 | 3.357574605 | 4.11170414   | Up   | 2.95E-05  | 5.03E-05  | Serine protease OS=Culex quinquefasciatus GN=CpipJ_CPIJ002753 PE=3 SV=1                                             |
| CCG026120.1 | 606   | 4    | 85 | 0.28362861 | 4.903388656 | 4.11170414   | Up   | 2.95E-05  | 5.02E-05  | AAEL000163-PA OS=Aedes aegypti GN=AAEL000163 PE=4 SV=1                                                              |
| CCG025807.1 | 884   | 6    | 85 | 0.29164978 | 3.361372767 | 3.526741639  | Up   | 8.38E-06  | 1.47E-05  | AAEL010576-PA OS=Aedes aegypti GN=AAEL010576 PE=4 SV=1                                                              |

|             |      |     |    |            |             |              |      |           |            |                                                                   |
|-------------|------|-----|----|------------|-------------|--------------|------|-----------|------------|-------------------------------------------------------------------|
| CCG002199.1 | 1257 | 18  | 85 | 0.6153184  | 2.363924841 | 1.941779139  | Up   | 7.21E-09  | 1.44E-08   | AAEL008337-PA OS=Aedes aegypti GN=AAEL008337 PE=4 SV=1            |
| CCG017670.1 | 1127 | 22  | 85 | 0.83880582 | 2.636604726 | 1.652272521  | Up   | 1.79E-07  | 3.39E-07   | AAEL011007-PA OS=Aedes aegypti GN=AAEL011007 PE=4 SV=1            |
| CCG007902.1 | 3464 | 23  | 85 | 0.28530713 | 0.857809909 | 1.588142184  | Up   | 3.88E-07  | 7.26E-07   | Pol-like protein OS=Biomphalaria glabrata PE=4 SV=1               |
| CCG000197.1 | 987  | 24  | 85 | 1.04485677 | 3.010591211 | 1.526741639  | Up   | 8.13E-07  | 1.50E-06   | AAEL012538-PA OS=Aedes aegypti GN=AAEL012538 PE=4 SV=1            |
| CCG018723.1 | 883  | 25  | 85 | 1.21658365 | 3.365179531 | 1.46784795   | Up   | 1.65E-06  | 3.01E-06   | -                                                                 |
| CCG010910.1 | 744  | 33  | 85 | 1.90591565 | 3.993889147 | 1.067310021  | Up   | 0.0001831 | 0.00029486 | AAEL008376-PA OS=Aedes aegypti GN=AAEL008376 PE=4 SV=1            |
| CCG014844.1 | 1413 | 144 | 85 | 4.37908123 | 2.102939509 | -1.058220861 | Down | 4.49E-08  | 8.74E-08   | Sex peptide receptor OS=Aedes aegypti GN=SPR PE=2 SV=1            |
| CCG005884.1 | 3975 | 176 | 85 | 1.90255932 | 0.747535478 | -1.347727479 | Down | 2.18E-13  | 6.26E-13   | AAEL012104-PA (Fragment) OS=Aedes aegypti GN=AAEL012104 PE=4 SV=1 |
| CCG009485.1 | 934  | 179 | 85 | 8.23509903 | 3.181427758 | -1.372111637 | Down | 6.26E-14  | 2.07E-13   | AAEL012383-PA OS=Aedes aegypti GN=AAEL012383 PE=4 SV=1            |
| CCG019209.1 | 732  | 179 | 85 | 10.5076264 | 4.05936274  | -1.372111637 | Down | 6.26E-14  | 2.07E-13   | AAEL002520-PA OS=Aedes aegypti GN=AAEL002520 PE=4 SV=1            |
| CCG003593.1 | 1803 | 191 | 85 | 4.55197965 | 1.648060746 | -1.465724688 | Down | 3.64E-16  | 1.36E-15   | AAEL009520-PA OS=Aedes aegypti GN=AAEL009520 PE=4 SV=1            |
| CCG018416.1 | 2166 | 195 | 85 | 3.86846641 | 1.3718622   | -1.495626174 | Down | 6.21E-17  | 2.35E-16   | AAEL000474-PA OS=Aedes aegypti GN=AAEL000474 PE=4 SV=1            |
| CCG000809.1 | 1590 | 287 | 85 | 7.75617222 | 1.868838695 | -2.053202787 | Down | 6.49E-37  | 2.85E-36   | AAEL014910-PA OS=Aedes aegypti GN=AAEL014910 PE=4 SV=1            |
| CCG010126.1 | 819  | 291 | 85 | 15.2676346 | 3.628148383 | -2.073171203 | Down | 7.31E-38  | 3.22E-37   | AAEL002678-PA OS=Aedes aegypti GN=AAEL002678 PE=4 SV=1            |
| CCG001729.1 | 231  | 409 | 85 | 76.0806124 | 12.86343518 | -2.564252893 | Down | 8.53E-68  | 4.21E-67   | AAEL000458-PA (Fragment) OS=Aedes aegypti GN=AAEL000458 PE=2 SV=1 |
| CCG024453.1 | 1419 | 499 | 85 | 15.1105691 | 2.094047587 | -2.851191865 | Down | 1.94E-92  | 1.02E-91   | Lipase OS=Aedes aegypti GN=AAEL004933 PE=3 SV=1                   |
| CCG016362.1 | 1467 | 555 | 85 | 16.2564436 | 2.025530692 | -3.004639821 | Down | 2.61E-108 | 1.40E-107  | AAEL004690-PA OS=Aedes aegypti GN=AAEL004690 PE=4 SV=1            |

|             |      |      |    |            |             |              |      |           |            |                                                                                          |
|-------------|------|------|----|------------|-------------|--------------|------|-----------|------------|------------------------------------------------------------------------------------------|
| CCG016273.1 | 654  | 1299 | 85 | 85.3481426 | 4.54350692  | -4.231481575 | Down | 0         | 0          | AAEL013506-PA OS=Aedes aegypti GN=CTLGA2_b PE=4 SV=1                                     |
| CCG001542.1 | 1644 | 1620 | 85 | 42.3424392 | 1.807453483 | -4.550073958 | Down | 0         | 0          | AAEL003038-PA OS=Aedes aegypti GN=AAEL003038 PE=4 SV=1                                   |
| CCG017210.1 | 1536 | 1842 | 85 | 51.5301114 | 1.934540056 | -4.735353206 | Down | 0         | 0          | AAEL004046-PA OS=Aedes aegypti GN=AAEL004048 PE=4 SV=1                                   |
| CCG016526.1 | 774  | 3    | 86 | 0.16654936 | 3.884252975 | 4.543615458  | Up   | 5.28E-05  | 8.86E-05   | Putative uncharacterized protein OS=Culex quinquefasciatus GN=CpipJ_CPIJ004372 PE=4 SV=1 |
| CCG021960.1 | 1332 | 3    | 86 | 0.09677868 | 2.257065918 | 4.543615458  | Up   | 5.28E-05  | 8.86E-05   | AAEL003984-PA OS=Aedes aegypti GN=AAEL003984 PE=4 SV=1                                   |
| CCG008861.1 | 1068 | 9    | 86 | 0.36210451 | 2.814992324 | 2.958652957  | Up   | 1.09E-06  | 2.01E-06   | AAEL011858-PA OS=Aedes aegypti GN=AAEL011858 PE=4 SV=1                                   |
| CCG010541.1 | 588  | 10   | 86 | 0.7307778  | 5.112945242 | 2.806649864  | Up   | 5.43E-07  | 1.01E-06   | tRNA-dihydrouridine synthase OS=Aedes aegypti GN=AAEL005898 PE=3 SV=1                    |
| CCG001909.1 | 477  | 13   | 86 | 1.17108291 | 6.30275011  | 2.42813824   | Up   | 6.34E-08  | 1.22E-07   | AAEL007556-PA OS=Aedes aegypti GN=AAEL007556 PE=4 SV=1                                   |
| CCG001148.1 | 999  | 19   | 86 | 0.8172422  | 3.009421224 | 1.880650445  | Up   | 1.02E-08  | 2.04E-08   | Guanylate cyclase OS=Aedes aegypti GN=AAEL007359 PE=3 SV=1                               |
| CCG007102.1 | 561  | 19   | 86 | 1.45530295 | 5.359022821 | 1.880650445  | Up   | 1.02E-08  | 2.04E-08   | Putative uncharacterized protein OS=Culex quinquefasciatus GN=CpipJ_CPIJ015728 PE=4 SV=1 |
| CCG016981.1 | 1573 | 20   | 86 | 0.54634119 | 1.911259887 | 1.806649864  | Up   | 2.35E-08  | 4.62E-08   | AAEL010790-PA OS=Aedes aegypti GN=AAEL010790 PE=4 SV=1                                   |
| CCG002771.1 | 315  | 21   | 86 | 2.86464897 | 9.544164452 | 1.736260536  | Up   | 5.44E-08  | 1.06E-07   | AAEL009672-PA OS=Aedes aegypti GN=AAEL009672 PE=4 SV=1                                   |
| CCG022658.1 | 472  | 30   | 86 | 2.7311272  | 6.369516531 | 1.221687363  | Up   | 2.77E-05  | 4.74E-05   | -                                                                                        |
| CCG013819.1 | 1431 | 33   | 86 | 0.99091631 | 2.100916703 | 1.084183839  | Up   | 0.000138  | 0.00022366 | AAEL007305-PA OS=Aedes aegypti GN=AAEL007305 PE=4 SV=1                                   |
| CCG027467.2 | 439  | 34   | 86 | 3.32795211 | 6.848318457 | 1.041115117  | Up   | 0.0002257 | 0.00036171 | -                                                                                        |
| CCG022095.1 | 1308 | 143  | 86 | 4.69776151 | 2.298479971 | -1.031293378 | Down | 9.45E-08  | 1.82E-07   | AAEL006265-PA (Fragment) OS=Aedes aegypti GN=AAEL006265 PE=4 SV=1                        |

|             |      |      |    |            |             |              |      |           |           |                                                                                          |
|-------------|------|------|----|------------|-------------|--------------|------|-----------|-----------|------------------------------------------------------------------------------------------|
| CCG011516.1 | 1341 | 150  | 86 | 4.80645801 | 2.241917824 | -1.100240732 | Down | 8.21E-09  | 1.64E-08  | AAEL011899-PA OS=Aedes aegypti GN=AAEL011899 PE=4 SV=1                                   |
| CCG016757.1 | 876  | 151  | 86 | 7.40688348 | 3.431976943 | -1.109826781 | Down | 5.73E-09  | 1.15E-08  | -                                                                                        |
| CCG024633.1 | 1398 | 187  | 86 | 5.74773989 | 2.150509158 | -1.418316501 | Down | 3.67E-15  | 1.33E-14  | AAEL014355-PA OS=Aedes aegypti GN=AAEL014355 PE=4 SV=1                                   |
| CCG004241.1 | 796  | 205  | 86 | 11.0663261 | 3.776899249 | -1.550902141 | Down | 1.27E-18  | 4.89E-18  | AAEL000692-PA OS=Aedes aegypti GN=CYP6AG6 PE=3 SV=1                                      |
| CCG011445.2 | 1398 | 237  | 86 | 7.28456874 | 2.150509158 | -1.76016529  | Down | 3.04E-25  | 1.24E-24  | AAEL014355-PA OS=Aedes aegypti GN=AAEL014355 PE=4 SV=1                                   |
| CCG027498.1 | 1218 | 277  | 86 | 9.77226313 | 2.468318393 | -1.985164208 | Down | 3.38E-34  | 1.46E-33  | AGAP000138-PB OS=Anopheles gambiae GN=AgaP_AGAP000138 PE=2 SV=1                          |
| CCG002414.1 | 777  | 338  | 86 | 18.6921111 | 3.869255859 | -2.272301478 | Down | 6.16E-49  | 2.86E-48  | Putative uncharacterized protein OS=Culex quinquefasciatus GN=CpipJ_CPIJ005987 PE=4 SV=1 |
| CCG005177.1 | 849  | 368  | 86 | 18.6252795 | 3.541121086 | -2.394983998 | Down | 1.47E-56  | 7.02E-56  | AAEL000870-PA OS=Aedes aegypti GN=AAEL008701 PE=4 SV=1                                   |
| CCG004658.1 | 1514 | 456  | 86 | 12.9420073 | 1.985740953 | -2.704312056 | Down | 5.70E-80  | 2.90E-79  | AAEL0003192-PA OS=Aedes aegypti GN=AAEL003192 PE=4 SV=1                                  |
| CCG005951.1 | 1797 | 862  | 86 | 20.6120819 | 1.673017141 | -3.622966101 | Down | 3.90E-199 | 2.33E-198 | AAEL0006064-PA OS=Aedes aegypti GN=AAEL006064 PE=4 SV=1                                  |
| CCG005322.1 | 1223 | 6620 | 86 | 232.591695 | 2.458227148 | -6.564037543 | Down | 0         | 0         | Putative uncharacterized protein OS=Culex quinquefasciatus GN=CpipJ_CPIJ018952 PE=4 SV=1 |
| CCG000328.1 | 864  | 0    | 87 | 0.001      | 3.520104258 | 11.78140244  | Up   | 4.44E-16  | 1.63E-15  | Putative uncharacterized protein OS=Culex quinquefasciatus GN=CpipJ_CPIJ008885 PE=4 SV=1 |
| CCG014091.1 | 544  | 15   | 87 | 1.18482724 | 5.590753822 | 2.238366104  | Up   | 1.49E-08  | 2.94E-08  | AAEL004644-PA OS=Aedes aegypti GN=AAEL004644 PE=4 SV=1                                   |
| CCG021691.1 | 2093 | 15   | 87 | 0.30795319 | 1.453115184 | 2.238366104  | Up   | 1.49E-08  | 2.94E-08  | Putative uncharacterized protein OS=Aedes aegypti PE=4 SV=1                              |
| CCG013065.1 | 3059 | 18   | 87 | 0.25284577 | 0.994236705 | 1.975331698  | Up   | 4.07E-09  | 8.23E-09  | Polyprotein OS=Mizuhopecten yessoensis PE=4 SV=1                                         |
| CCG018742.1 | 724  | 24   | 87 | 1.42441109 | 4.200787402 | 1.560294199  | Up   | 3.97E-07  | 7.44E-07  | AAEL001764-PA OS=Aedes aegypti GN=AAEL001764 PE=4 SV=1                                   |

|             |      |      |    |            |             |              |      |           |            |                                                                                                                                                                              |
|-------------|------|------|----|------------|-------------|--------------|------|-----------|------------|------------------------------------------------------------------------------------------------------------------------------------------------------------------------------|
| CCG000655.1 | 1992 | 27   | 87 | 0.5824211  | 1.526792208 | 1.390369198  | Up   | 3.22E-06  | 5.77E-06   | AAEL013488-PA OS=Aedes aegypti GN=AAEL013488 PE=3 SV=1                                                                                                                       |
| CCG006140.1 | 1444 | 29   | 87 | 0.86296558 | 2.106211966 | 1.287275705  | Up   | 1.13E-05  | 1.97E-05   | LINE-1 retrotransposon-like element, putative (Fragment) OS=Aspergillus flavus (strain ATCC 200026 / FGSC A1120 / NRRL 3357 / JCM 12722 / SRRC 167) GN=AFLA_063980 PE=4 SV=1 |
| CCG020722.1 | 638  | 29   | 87 | 1.95316976 | 4.767037742 | 1.287275705  | Up   | 1.13E-05  | 1.97E-05   | -                                                                                                                                                                            |
| CCG022158.1 | 1587 | 33   | 87 | 0.89351055 | 1.916427271 | 1.10086258   | Up   | 0.0001038 | 0.00016918 | AAEL013562-PA OS=Aedes aegypti GN=AAEL013562 PE=4 SV=1                                                                                                                       |
| CCG020402.1 | 498  | 151  | 87 | 13.0289758 | 6.107168834 | -1.09314804  | Down | 8.77E-09  | 1.75E-08   | AAEL007773-PA OS=Aedes aegypti GN=AAEL007773 PE=4 SV=1                                                                                                                       |
| CCG011804.1 | 552  | 178  | 87 | 13.8561825 | 5.509728404 | -1.330476731 | Down | 2.76E-13  | 7.70E-13   | AAEL006454-PA OS=Aedes aegypti GN=AAEL006454 PE=4 SV=1                                                                                                                       |
| CCG000250.1 | 2037 | 191  | 87 | 4.02907183 | 1.493063367 | -1.432172128 | Down | 1.16E-15  | 4.22E-15   | Transmembrane protease OS=Culex quinquefasciatus GN=CpipJ_CPIJ007099 PE=3 SV=1                                                                                               |
| CCG003964.1 | 1401 | 210  | 87 | 6.44085958 | 2.170856588 | -1.568988818 | Down | 2.43E-19  | 9.41E-19   | Putative uncharacterized protein OS=Culex quinquefasciatus GN=CpipJ_CPIJ001097 PE=4 SV=1                                                                                     |
| CCG016676.1 | 747  | 218  | 87 | 12.5400296 | 4.071445889 | -1.622927625 | Down | 5.90E-21  | 2.32E-20   | AAEL000457-PA OS=Aedes aegypti GN=AAEL000457 PE=4 SV=1                                                                                                                       |
| CCG017064.1 | 948  | 364  | 87 | 16.4989276 | 3.208196286 | -2.362537941 | Down | 4.51E-55  | 2.14E-54   | AAEL004353-PA OS=Aedes aegypti GN=AAEL004353 PE=4 SV=1                                                                                                                       |
| CCG009966.1 | 807  | 746  | 87 | 39.7217125 | 3.768736158 | -3.397775121 | Down | 3.87E-163 | 2.23E-162  | Putative secreted protein OS=Aedes aegypti PE=2 SV=1                                                                                                                         |
| CCG000284.1 | 759  | 6909 | 87 | 391.143474 | 4.007075203 | -6.609004497 | Down | 0         | 0          | AAEL011802-PA OS=Aedes aegypti GN=AAEL011802 PE=4 SV=1                                                                                                                       |
| CCG019520.1 | 1239 | 2    | 88 | 0.06936196 | 2.482912313 | 5.161744822  | Up   | 9.36E-05  | 0.00015345 | -                                                                                                                                                                            |
| CCG008396.1 | 378  | 3    | 88 | 0.34102964 | 8.138434804 | 4.576782322  | Up   | 5.28E-05  | 8.85E-05   | AAEL004541-PA OS=Aedes aegypti GN=AAEL004541 PE=4 SV=1                                                                                                                       |
| CCG014682.1 | 399  | 6    | 88 | 0.64616142 | 7.71009613  | 3.576782322  | Up   | 8.38E-06  | 1.48E-05   | Putative uncharacterized protein OS=Culex quinquefasciatus GN=CpipJ_CPIJ001479 PE=4 SV=1                                                                                     |

|             |       |     |    |            |             |              |      |           |            |                                                                                          |
|-------------|-------|-----|----|------------|-------------|--------------|------|-----------|------------|------------------------------------------------------------------------------------------|
| CCG023561.1 | 1033  | 8   | 88 | 0.33277626 | 2.97805262  | 3.161744822  | Up   | 2.19E-06  | 3.96E-06   | AAEL002757-PA OS=Aedes aegypti GN=AAEL002757 PE=4 SV=1                                   |
| CCG010711.1 | 645   | 10  | 88 | 0.66619744 | 4.769501327 | 2.839816728  | Up   | 5.43E-07  | 1.01E-06   | Transporter OS=Aedes aegypti GN=AAEL003624 PE=3 SV=1                                     |
| CCG004156.1 | 933   | 11  | 88 | 0.50660995 | 3.297243683 | 2.702313204  | Up   | 2.67E-07  | 5.03E-07   | AAEL004637-PA OS=Aedes aegypti GN=AAEL004837 PE=4 SV=1                                   |
| CCG008483.1 | 1011  | 17  | 88 | 0.72253758 | 3.04285693  | 2.074281981  | Up   | 3.99E-09  | 8.06E-09   | AAEL007064-PA OS=Aedes aegypti GN=GNBPB6 PE=2 SV=1                                       |
| CCG020113.1 | 1134  | 24  | 88 | 0.90941237 | 2.712811601 | 1.576782322  | Up   | 2.77E-07  | 5.20E-07   | AAEL015081-PA OS=Aedes aegypti GN=AAEL015081 PE=3 SV=1                                   |
| CCG013536.1 | 1422  | 27  | 88 | 0.81588104 | 2.163381404 | 1.40685732   | Up   | 2.30E-06  | 4.15E-06   | Putative uncharacterized protein OS=Culex quinquefasciatus GN=CpipJ_CPIJ002266 PE=4 SV=1 |
| CCG009064.1 | 1482  | 30  | 88 | 0.86983268 | 2.075795112 | 1.254854227  | Up   | 1.49E-05  | 2.59E-05   | AAEL007260-PA OS=Aedes aegypti GN=AAEL007260 PE=4 SV=1                                   |
| CCG014773.1 | 3036  | 30  | 88 | 0.42460212 | 1.013283385 | 1.254854227  | Up   | 1.49E-05  | 2.59E-05   | AAEL012498-PA OS=Aedes aegypti GN=AAEL012498 PE=4 SV=1                                   |
| CCG009849.1 | 813   | 31  | 88 | 1.63845237 | 3.783921717 | 1.207548512  | Up   | 2.64E-05  | 4.52E-05   | AAEL000174-PA OS=Aedes aegypti GN=AAEL000174 PE=4 SV=1                                   |
| CCG006023.1 | 920   | 35  | 88 | 1.63471816 | 3.34383517  | 1.032461806  | Up   | 0.0002102 | 0.00033747 | -                                                                                        |
| CCG021398.1 | 945   | 185 | 88 | 8.41206445 | 3.255373922 | -1.369636638 | Down | 2.60E-14  | 9.05E-14   | AAEL010068-PA OS=Aedes aegypti GN=AAEL010068 PE=4 SV=1                                   |
| CCG026713.1 | 1428  | 197 | 88 | 5.92789756 | 2.154291566 | -1.460306997 | Down | 1.53E-16  | 5.74E-16   | -                                                                                        |
| CCG014119.1 | 10561 | 215 | 88 | 0.87477445 | 0.291291389 | -1.586448027 | Down | 4.60E-20  | 1.80E-19   | AAEL009419-PA (Fragment) OS=Aedes aegypti GN=AAEL009419 PE=4 SV=1                        |
| CCG002398.1 | 1659  | 226 | 88 | 5.85362268 | 1.854326917 | -1.65843414  | Down | 2.62E-22  | 1.04E-21   | AAEL000804-PA OS=Aedes aegypti GN=AAEL000804 PE=4 SV=1                                   |
| CCG019949.1 | 1587  | 232 | 88 | 6.28164992 | 1.938455171 | -1.696236173 | Down | 1.47E-23  | 5.91E-23   | AAEL014910-PA OS=Aedes aegypti GN=AAEL014910 PE=4 SV=1                                   |
| CCG025992.1 | 1233  | 282 | 88 | 9.82762787 | 2.494994611 | -1.97780653  | Down | 1.28E-34  | 5.52E-34   | AAEL009864-PA OS=Aedes aegypti GN=AAEL009864 PE=4 SV=1                                   |
| CCG003787.1 | 762   | 289 | 88 | 16.2969203 | 4.03717632  | -2.01318086  | Down | 3.01E-36  | 1.31E-35   | -                                                                                        |

|             |       |       |    |            |             |              |      |           |           |                                                                                                          |
|-------------|-------|-------|----|------------|-------------|--------------|------|-----------|-----------|----------------------------------------------------------------------------------------------------------|
| CCG021805.1 | 1854  | 433   | 88 | 10.0355421 | 1.659292533 | -2.596478392 | Down | 1.10E-72  | 5.49E-72  | Putative uncharacterized protein<br>OS=Culex quinquefasciatus<br>GN=CpipJ_CPIJ005453 PE=4<br>SV=1        |
| CCG013056.1 | 381   | 736   | 88 | 83.0071514 | 8.07435264  | -3.361817134 | Down | 2.00E-159 | 1.15E-158 | AAEL002920-PA OS=Aedes<br>aegypti GN=AAEL002920 PE=4<br>SV=1                                             |
| CCG012756.1 | 477   | 991   | 88 | 89.2725514 | 6.449325694 | -3.790996425 | Down | 2.06E-237 | 1.26E-236 | AAEL008764-PA OS=Aedes<br>aegypti GN=AAEL008764 PE=4<br>SV=1                                             |
| CCG000991.1 | 579   | 5     | 89 | 0.37106852 | 5.373552043 | 3.85611854   | Up   | 1.59E-05  | 2.76E-05  | AAEL008915-PA OS=Aedes<br>aegypti GN=AAEL008915 PE=4<br>SV=1                                             |
| CCG007006.1 | 504   | 20    | 89 | 1.7051482  | 6.173187763 | 1.85611854   | Up   | 7.39E-09  | 1.48E-08  | AAEL011142-PA OS=Aedes<br>aegypti GN=AAEL011142 PE=4<br>SV=1                                             |
| CCG018482.1 | 480   | 22    | 89 | 1.96944617 | 6.481847152 | 1.718615016  | Up   | 3.95E-08  | 7.71E-08  | AAEL006177-PA OS=Aedes<br>aegypti GN=AAEL006177 PE=4<br>SV=1                                             |
| CCG006575.1 | 537   | 28    | 89 | 2.24050758 | 5.793829856 | 1.370691713  | Up   | 3.16E-06  | 5.67E-06  | AAEL005735-PA OS=Aedes<br>aegypti GN=AAEL005735 PE=4<br>SV=1                                             |
| CCG016898.1 | 1395  | 152   | 89 | 4.68200693 | 2.230312998 | -1.069880879 | Down | 1.42E-08  | 2.81E-08  | AAEL007606-PA OS=Aedes<br>aegypti GN=CYP4D39 PE=3<br>SV=1                                                |
| CCG026866.1 | 4210  | 166   | 89 | 1.69429357 | 0.739022953 | -1.196992797 | Down | 8.54E-11  | 1.83E-10  | -                                                                                                        |
| CCG002693.1 | 1017  | 243   | 89 | 10.2671047 | 3.059278892 | -1.746765869 | Down | 1.39E-25  | 5.69E-25  | Bruchpilot, isoform G<br>OS=Drosophila melanogaster<br>GN=brp PE=4 SV=2                                  |
| CCG016843.1 | 1119  | 296   | 89 | 11.3664356 | 2.780417009 | -2.031406731 | Down | 1.64E-37  | 7.21E-37  | AAEL009635-PA OS=Aedes<br>aegypti GN=AAEL009635 PE=4<br>SV=1                                             |
| CCG016119.1 | 11883 | 1182  | 89 | 4.27419223 | 0.261826696 | -4.028967685 | Down | 1.51E-296 | 9.47E-296 | AAEL000512-PA OS=Aedes<br>aegypti GN=AAEL000512 PE=4<br>SV=1                                             |
| CCG019884.1 | 1461  | 1493  | 89 | 43.9108924 | 2.129559639 | -4.365951815 | Down | 0         | 0         | AAEL008062-PA (Fragment)<br>OS=Aedes aegypti<br>GN=AAEL008062 PE=4 SV=1                                  |
| CCG014029.1 | 1110  | 17210 | 89 | 666.224444 | 2.80296093  | -7.892912842 | Down | 0         | 0         | Uncharacterized protein<br>OS=Anopheles darlingi<br>GN=AND_01528 PE=4 SV=1                               |
| CCG019189.1 | 312   | 4     | 90 | 0.55089403 | 10.0841183  | 4.1941663    | Up   | 2.95E-05  | 5.03E-05  | Synaptic vesicular amine<br>transporter OS=Culex<br>quinquefasciatus<br>GN=CpipJ_CPIJ012480 PE=4<br>SV=1 |



|             |      |     |    |            |             |              |      |           |           |                                                                                                                     |
|-------------|------|-----|----|------------|-------------|--------------|------|-----------|-----------|---------------------------------------------------------------------------------------------------------------------|
| CCG005276.1 | 1970 | 7   | 90 | 0.15268434 | 1.597078634 | 3.386811378  | Up   | 4.31E-06  | 7.69E-06  | BEL12_AG transposon polyprotein<br>OS=Anopheles gambiae<br>GN=BEL12-AG transposon PE=4<br>SV=1                      |
| CCG027342.1 | 519  | 10  | 90 | 0.82793323 | 6.06212892  | 2.872238205  | Up   | 5.43E-07  | 1.01E-06  | AAEL000267-PA OS=Aedes<br>aegypti GN=AAEL000267 PE=4<br>SV=1                                                        |
| CCG025976.1 | 441  | 12  | 90 | 1.16924448 | 7.134342198 | 2.609203799  | Up   | 1.30E-07  | 2.49E-07  | AAEL004210-PA OS=Aedes<br>aegypti GN=AAEL004210 PE=4<br>SV=1                                                        |
| CCG007223.1 | 1224 | 13  | 90 | 0.4563779  | 2.570461527 | 2.493726582  | Up   | 6.34E-08  | 1.22E-07  | -                                                                                                                   |
| CCG007720.1 | 1077 | 24  | 90 | 0.95754283 | 2.921304466 | 1.609203799  | Up   | 1.33E-07  | 2.54E-07  | AAEL009129-PA OS=Aedes<br>aegypti GN=CYP6Z9 PE=3 SV=1                                                               |
| CCG022186.1 | 1236 | 26  | 90 | 0.90389409 | 2.54550559  | 1.493726582  | Up   | 5.82E-07  | 1.08E-06  | AAEL001925-PA OS=Aedes<br>aegypti GN=AAEL001925 PE=4<br>SV=1                                                        |
| CCG004450.1 | 3522 | 29  | 90 | 0.35381099 | 0.893312013 | 1.336185305  | Up   | 4.29E-06  | 7.67E-06  | AAEL007304-PA OS=Aedes<br>aegypti GN=AAEL007304 PE=4<br>SV=1                                                        |
| CCG022996.1 | 1392 | 31  | 90 | 0.95694093 | 2.260233412 | 1.23996999   | Up   | 1.43E-05  | 2.48E-05  | AAEL005058-PA OS=Aedes<br>aegypti GN=AAEL005058 PE=4<br>SV=1                                                        |
| CCG004079.1 | 1359 | 256 | 90 | 8.09437238 | 2.315117667 | -1.8058337   | Down | 4.49E-28  | 1.87E-27  | AAEL012720-PA OS=Aedes<br>aegypti GN=AAEL012720 PE=4<br>SV=1                                                        |
| CCG019191.1 | 585  | 272 | 90 | 19.9790903 | 5.378196427 | -1.893296541 | Down | 1.26E-31  | 5.37E-31  | Calcium-activated potassium<br>channel alpha chain OS=Culex<br>quinquefasciatus<br>GN=CpipJ_CPIJ005769 PE=4<br>SV=1 |
| CCG026366.1 | 566  | 340 | 90 | 25.8122081 | 5.558736589 | -2.215224636 | Down | 1.01E-47  | 4.65E-47  | -                                                                                                                   |
| CCG017978.1 | 918  | 346 | 90 | 16.1955645 | 3.427282036 | -2.240461927 | Down | 3.29E-49  | 1.53E-48  | AAEL004096-PA OS=Aedes<br>aegypti GN=AAEL004096 PE=4<br>SV=1                                                        |
| CCG014455.1 | 2148 | 413 | 90 | 8.26187169 | 1.464732267 | -2.495831671 | Down | 2.27E-66  | 1.11E-65  | AAEL009203-PA OS=Aedes<br>aegypti GN=AAEL009203 PE=3<br>SV=1                                                        |
| CCG008805.1 | 931  | 599 | 90 | 27.646478  | 3.379425252 | -3.032245893 | Down | 7.77E-118 | 4.24E-117 | AAEL009295-PA OS=Aedes<br>aegypti GN=AAEL009295 PE=4<br>SV=1                                                        |
| CCG018448.1 | 852  | 674 | 90 | 33.9924896 | 3.692775715 | -3.202438481 | Down | 1.19E-139 | 6.69E-139 | AAEL009296-PA OS=Aedes<br>aegypti GN=AAEL009298 PE=4<br>SV=1                                                        |
| CCG027571.1 | 426  | 4   | 91 | 0.40347169 | 7.467613113 | 4.210107844  | Up   | 2.95E-05  | 5.04E-05  | AAEL002491-PA OS=Aedes<br>aegypti GN=AAEL002491 PE=4<br>SV=1                                                        |

|             |      |     |    |            |             |              |      |          |          |                                                                                              |
|-------------|------|-----|----|------------|-------------|--------------|------|----------|----------|----------------------------------------------------------------------------------------------|
| CCG011638.1 | 1631 | 10  | 91 | 0.26345637 | 1.950461794 | 2.888179749  | Up   | 5.43E-07 | 1.01E-06 | AAEL010625-PA OS=Aedes aegypti GN=AAEL010625 PE=4 SV=1                                       |
| CCG001366.1 | 483  | 16  | 91 | 1.42342806 | 6.586342001 | 2.210107844  | Up   | 7.15E-09 | 1.43E-08 | AAEL004301-PA OS=Aedes aegypti GN=AAEL004301 PE=2 SV=1                                       |
| CCG004647.1 | 552  | 17  | 91 | 1.32334328 | 5.763049251 | 2.122645003  | Up   | 3.56E-09 | 7.21E-09 | AAEL007970-PA OS=Aedes aegypti GN=AAEL007970 PE=4 SV=1                                       |
| CCG008402.1 | 984  | 32  | 91 | 1.39738974 | 3.232930067 | 1.210107844  | Up   | 1.86E-05 | 3.20E-05 | AAEL004589-PA OS=Aedes aegypti GN=AAEL004589 PE=3 SV=1                                       |
| CCG003253.1 | 2469 | 34  | 91 | 0.59172579 | 1.288458156 | 1.122645003  | Up   | 5.48E-05 | 9.13E-05 | AAEL002126-PA OS=Aedes aegypti GN=CLIPA15 PE=3 SV=2                                          |
| CCG026939.1 | 1100 | 156 | 91 | 6.09388964 | 2.892002897 | -1.075294375 | Down | 7.95E-09 | 1.59E-08 | faty acid desaturase OS=Culex quinquefasciatus GN=CpipJ_CPIJ004097 PE=4 SV=1                 |
| CCG000861.1 | 1515 | 157 | 91 | 4.4529692  | 2.099804083 | -1.084512905 | Down | 5.59E-09 | 1.13E-08 | Cytochrome P450 OS=Culex quinquefasciatus GN=CpipJ_CPIJ005957 PE=3 SV=1                      |
| CCG028500.2 | 993  | 171 | 91 | 7.39962197 | 3.203628586 | -1.207744671 | Down | 3.24E-11 | 7.03E-11 | AAEL000574-PA OS=Aedes aegypti GN=AAEL000574 PE=4 SV=1                                       |
| CCG001155.1 | 966  | 182 | 91 | 8.0957471  | 3.293171    | -1.297686796 | Down | 4.32E-13 | 1.14E-12 | AAEL008219-PA OS=Aedes aegypti GN=AAEL008219 PE=4 SV=1                                       |
| CCG010608.2 | 1156 | 218 | 91 | 8.10328905 | 2.75190587  | -1.558076481 | Down | 7.88E-20 | 3.07E-19 | Guanylate cyclase OS=Aedes aegypti GN=AAEL006806 PE=3 SV=1                                   |
| CCG016719.1 | 1908 | 258 | 91 | 5.81037292 | 1.667297267 | -1.801119411 | Down | 3.49E-28 | 1.45E-27 | AAEL007378-PA OS=Aedes aegypti GN=AAEL007378 PE=4 SV=1                                       |
| CCG024778.1 | 963  | 366 | 91 | 16.3311764 | 3.3034301   | -2.305591994 | Down | 8.78E-54 | 4.15E-53 | inositol polyphosphate 1-phosphatase OS=Culex quinquefasciatus GN=CpipJ_CPIJ015548 PE=4 SV=1 |
| CCG028323.1 | 1012 | 7   | 92 | 0.29722148 | 3.178025161 | 3.418520238  | Up   | 4.31E-06 | 7.69E-06 | AAEL015563-PA (Fragment) OS=Aedes aegypti GN=AAEL015563 PE=3 SV=1                            |
| CCG014920.1 | 993  | 15  | 92 | 0.64908965 | 3.238833296 | 2.318984564  | Up   | 1.48E-08 | 2.92E-08 | AAEL000409-PA OS=Aedes aegypti GN=AAEL000409 PE=4 SV=1                                       |

|             |      |     |    |            |             |              |      |           |            |                                                                                  |
|-------------|------|-----|----|------------|-------------|--------------|------|-----------|------------|----------------------------------------------------------------------------------|
| CCG004479.1 | 1092 | 18  | 92 | 0.70829233 | 2.945202805 | 2.055950158  | Up   | 1.92E-09  | 3.94E-09   | AAEL002106-PA OS=Aedes aegypti GN=AAEL002106 PE=4 SV=1                           |
| CCG006910.1 | 1251 | 24  | 92 | 0.82435942 | 2.570872472 | 1.640912659  | Up   | 6.37E-08  | 1.23E-07   | AAEL001631-PA OS=Aedes aegypti GN=AAEL001631 PE=4 SV=1                           |
| CCG000444.1 | 624  | 30  | 92 | 2.06585263 | 5.154104909 | 1.318984564  | Up   | 4.17E-06  | 7.46E-06   | Peptidyl-prolyl cis-trans isomerase OS=Aedes aegypti GN=AAEL011758 PE=3 SV=1     |
| CCG013398.1 | 720  | 33  | 92 | 1.96944617 | 4.466890921 | 1.181481041  | Up   | 2.39E-05  | 4.10E-05   | AAEL011715-PA OS=Aedes aegypti GN=AAEL011715 PE=4 SV=1                           |
| CCG015035.1 | 1197 | 33  | 92 | 1.18462927 | 2.686851682 | 1.181481041  | Up   | 2.39E-05  | 4.10E-05   | AAEL003024-PA OS=Aedes aegypti GN=AAEL003024 PE=4 SV=1                           |
| CCG005550.1 | 1593 | 37  | 92 | 0.99804154 | 2.01893375  | 1.016421794  | Up   | 0.0001819 | 0.00029306 | AAEL001807-PA OS=Aedes aegypti GN=CYP9M9 PE=3 SV=2                               |
| CCG013940.1 | 255  | 197 | 92 | 33.1962263 | 12.61239789 | -1.39617666  | Down | 1.50E-15  | 5.43E-15   | AAEL006510-PA (Fragment) OS=Aedes aegypti GN=AAEL006510 PE=4 SV=1                |
| CCG017425.1 | 1137 | 207 | 92 | 7.82298598 | 2.82863805  | -1.467611798 | Down | 2.00E-17  | 7.61E-17   | Peroxidasin OS=Aedes aegypti PE=2 SV=1                                           |
| CCG019907.1 | 591  | 344 | 92 | 25.0111484 | 5.441897569 | -2.200389595 | Down | 7.18E-48  | 3.32E-47   | GD19676 OS=Drosophila simulans GN=GD19676 PE=4 SV=1                              |
| CCG006995.1 | 474  | 4   | 93 | 0.36261379 | 6.858902405 | 4.241472015  | Up   | 2.95E-05  | 5.04E-05   | AAEL006900-PA OS=Aedes aegypti GN=AAEL006900 PE=4 SV=1                           |
| CCG011497.1 | 859  | 10  | 93 | 0.50022974 | 3.784772689 | 2.91954392   | Up   | 5.43E-07  | 1.01E-06   | Putative uncharacterized protein OS=Daphnia pulex GN=DAPPUDRAFT_306575 PE=4 SV=1 |
| CCG008647.1 | 882  | 19  | 93 | 0.92565188 | 3.686076803 | 1.993544501  | Up   | 1.31E-09  | 2.70E-09   | AAEL004482-PA OS=Aedes aegypti GN=AAEL004482 PE=4 SV=1                           |
| CCG004646.1 | 789  | 24  | 93 | 1.30706417 | 4.120557338 | 1.656509514  | Up   | 4.39E-08  | 8.56E-08   | AAEL007970-PA OS=Aedes aegypti GN=AAEL007970 PE=4 SV=1                           |
| CCG007342.1 | 820  | 30  | 93 | 1.57206346 | 3.964780171 | 1.334581419  | Up   | 3.01E-06  | 5.42E-06   | AAEL009058-PA OS=Aedes aegypti GN=AAEL009058 PE=4 SV=1                           |
| CCG026787.1 | 1697 | 31  | 93 | 0.78495096 | 1.915804207 | 1.287275705  | Up   | 5.56E-06  | 9.87E-06   | AAEL014133-PA OS=Aedes aegypti GN=AAEL014133 PE=4 SV=1                           |

|             |      |       |    |            |             |              |      |           |            |                                                                      |
|-------------|------|-------|----|------------|-------------|--------------|------|-----------|------------|----------------------------------------------------------------------|
| CCG013915.1 | 357  | 172   | 93 | 20.7025052 | 9.106777983 | -1.18479274  | Down | 5.62E-11  | 1.21E-10   | AAEL002817-PA OS=Aedes aegypti GN=AAEL002817 PE=4 SV=1               |
| CCG001072.1 | 2688 | 427   | 93 | 6.82592138 | 1.209493951 | -2.496620245 | Down | 1.38E-68  | 6.83E-68   | AAEL005429-PA OS=Aedes aegypti GN=AAEL005429 PE=4 SV=1               |
| CCG019525.1 | 679  | 460   | 93 | 29.1105713 | 4.788099764 | -2.604018036 | Down | 2.33E-77  | 1.17E-76   | -                                                                    |
| CCG012509.1 | 2187 | 493   | 93 | 9.6863645  | 1.486565953 | -2.703971821 | Down | 2.64E-86  | 1.36E-85   | AAEL010917-PA OS=Aedes aegypti GN=AAEL010917 PE=4 SV=1               |
| CCG015868.1 | 753  | 978   | 93 | 55.8092967 | 4.317556095 | -3.69221864  | Down | 2.63E-229 | 1.60E-228  | AAEL006131-PA OS=Aedes aegypti GN=AAEL006131 PE=4 SV=1               |
| CCG018642.1 | 1386 | 1207  | 93 | 37.4202523 | 2.345685238 | -3.995737946 | Down | 6.76E-301 | 4.26E-300  | AAEL005917-PA OS=Aedes aegypti GN=AAEL005917 PE=4 SV=1               |
| CCG001143.1 | 663  | 10543 | 93 | 683.303035 | 4.903649683 | -7.122525807 | Down | 0         | 0          | AAEL003041-PA OS=Aedes aegypti GN=AAEL003041 PE=4 SV=1               |
| CCG019969.1 | 360  | 0     | 94 | 0.001      | 9.127994491 | 13.15608221  | Up   | 4.44E-16  | 1.65E-15   | AAEL010787-PA OS=Aedes aegypti GN=AAEL010787 PE=3 SV=1               |
| CCG021098.1 | 491  | 0     | 94 | 0.001      | 6.692623252 | 12.70835609  | Up   | 4.44E-16  | 1.64E-15   | -                                                                    |
| CCG011738.1 | 846  | 0     | 94 | 0.001      | 3.884252975 | 11.92342145  | Up   | 4.44E-16  | 1.66E-15   | AAEL000769-PA OS=Aedes aegypti GN=AAEL000769 PE=4 SV=1               |
| CCG007699.1 | 1743 | 0     | 94 | 0.001      | 1.885300067 | 10.88057845  | Up   | 4.44E-16  | 1.64E-15   | AAEL013916-PA OS=Aedes aegypti GN=AAEL013916 PE=4 SV=1               |
| CCG014248.1 | 2184 | 7     | 94 | 0.13772351 | 1.504614476 | 3.449547133  | Up   | 4.31E-06  | 7.69E-06   | AAEL014398-PA OS=Aedes aegypti GN=AAEL014398 PE=4 SV=1               |
| CCG001889.1 | 1234 | 8     | 94 | 0.27857202 | 2.66294815  | 3.256902055  | Up   | 2.19E-06  | 3.96E-06   | AAEL006225-PA OS=Aedes aegypti GN=AAEL006225 PE=4 SV=1               |
| CCG024761.2 | 1302 | 19    | 94 | 0.6270545  | 2.523869444 | 2.008974542  | Up   | 1.13E-09  | 2.33E-09   | AAEL006450-PA OS=Aedes aegypti GN=AAEL006450 PE=4 SV=1               |
| CCG021849.2 | 1650 | 23    | 94 | 0.59897206 | 1.991562434 | 1.733340099  | Up   | 1.34E-08  | 2.66E-08   | AAEL004794-PA (Fragment) OS=Aedes aegypti GN=AAEL004794 PE=4 SV=1    |
| CCG027307.1 | 2975 | 25    | 94 | 0.36109021 | 1.104564039 | 1.613045866  | Up   | 6.62E-08  | 1.28E-07   | Uncharacterized protein OS=Anopheles darlingi GN=AND_03682 PE=4 SV=1 |
| CCG009909.1 | 1341 | 37    | 94 | 1.18559298 | 2.45046832  | 1.04744869   | Up   | 0.0001053 | 0.00017161 | AAEL010287-PA OS=Aedes aegypti GN=AAEL010287 PE=4 SV=1               |

|             |      |      |    |            |             |              |      |           |            |                                                                   |
|-------------|------|------|----|------------|-------------|--------------|------|-----------|------------|-------------------------------------------------------------------|
| CCG026248.1 | 741  | 38   | 94 | 2.20357613 | 4.434653194 | 1.008974542  | Up   | 0.0001691 | 0.00027257 | AAEL006882-PA OS=Aedes aegypti GN=AAEL006882 PE=4 SV=1            |
| CCG022826.1 | 454  | 180  | 94 | 17.0364587 | 7.238057305 | -1.234951041 | Down | 4.22E-12  | 9.74E-12   | -                                                                 |
| CCG027378.1 | 1008 | 191  | 94 | 8.14208265 | 3.259998032 | -1.320526773 | Down | 5.31E-14  | 1.78E-13   | -                                                                 |
| CCG003496.1 | 1626 | 204  | 94 | 5.39103681 | 2.02095819  | -1.415523286 | Down | 2.33E-16  | 8.73E-16   | AAEL003960-PA OS=Aedes aegypti GN=AAEL003960 PE=4 SV=1            |
| CCG003291.1 | 1388 | 219  | 94 | 6.77980683 | 2.367491366 | -1.517885004 | Down | 3.24E-19  | 1.25E-18   | AAEL004097-PA OS=Aedes aegypti GN=AAEL004097 PE=4 SV=1            |
| CCG022168.1 | 2724 | 322  | 94 | 5.0793886  | 1.206342884 | -2.074014823 | Down | 9.66E-42  | 4.34E-41   | AAEL002511-PA (Fragment) OS=Aedes aegypti GN=AAEL002511 PE=4 SV=1 |
| CCG018658.1 | 898  | 832  | 94 | 39.8116027 | 3.65932964  | -3.443537663 | Down | 6.11E-184 | 3.59E-183  | -                                                                 |
| CCG018907.1 | 783  | 1064 | 94 | 58.3905461 | 4.196779076 | -3.79838038  | Down | 3.65E-255 | 2.25E-254  | AAEL007416-PA OS=Aedes aegypti GN=AAEL007416 PE=4 SV=1            |
| CCG027550.2 | 888  | 2    | 95 | 0.09677868 | 3.739905736 | 5.272168812  | Up   | 9.36E-05  | 0.00015337 | AAEL008084-PA OS=Aedes aegypti GN=AAEL008084 PE=4 SV=1            |
| CCG020853.1 | 972  | 2    | 95 | 0.08841509 | 3.416704006 | 5.272168812  | Up   | 9.36E-05  | 0.00015352 | AAEL009134-PA (Fragment) OS=Aedes aegypti GN=AAEL009134 PE=4 SV=1 |
| CCG011424.1 | 706  | 5    | 95 | 0.30431823 | 4.704017413 | 3.950240717  | Up   | 1.59E-05  | 2.76E-05   | -                                                                 |
| CCG004529.1 | 885  | 10   | 95 | 0.48553372 | 3.752583382 | 2.950240717  | Up   | 5.43E-07  | 1.01E-06   | AAEL003102-PA OS=Aedes aegypti GN=AAEL003102 PE=3 SV=1            |
| CCG020391.1 | 471  | 10   | 95 | 0.91230859 | 7.05103247  | 2.950240717  | Up   | 5.43E-07  | 1.01E-06   | AAEL007313-PA OS=Aedes aegypti GN=AAEL007313 PE=4 SV=1            |
| CCG020720.1 | 2178 | 10   | 95 | 0.19728987 | 1.524810052 | 2.950240717  | Up   | 5.43E-07  | 1.01E-06   | -                                                                 |
| CCG007926.1 | 1056 | 12   | 95 | 0.48829244 | 3.144920732 | 2.687206311  | Up   | 1.30E-07  | 2.49E-07   | AAEL010930-PA OS=Aedes aegypti GN=AAEL010930 PE=4 SV=1            |
| CCG012730.1 | 849  | 18   | 95 | 0.91101911 | 3.911703526 | 2.102243811  | Up   | 1.71E-09  | 3.49E-09   | AAEL008860-PA OS=Aedes aegypti GN=AAEL008860 PE=4 SV=1            |
| CCG025686.1 | 1161 | 21   | 95 | 0.77723034 | 2.860496377 | 1.879851389  | Up   | 1.75E-09  | 3.58E-09   | AAEL011413-PA OS=Aedes aegypti GN=AAEL011413 PE=4 SV=1            |
| CCG001327.1 | 753  | 192  | 95 | 10.9564264 | 4.410406764 | -1.312793689 | Down | 5.94E-14  | 1.98E-13   | AAEL010671-PA OS=Aedes aegypti GN=AAEL010671 PE=3 SV=1            |
| CCG011092.1 | 2214 | 195  | 95 | 3.78459722 | 1.500016393 | -1.335161502 | Down | 1.75E-14  | 6.16E-14   | AAEL012091-PA OS=Aedes aegypti GN=AAEL012091 PE=3 SV=1            |

|             |      |      |    |            |             |              |      |          |            |                                                                                                      |
|-------------|------|------|----|------------|-------------|--------------|------|----------|------------|------------------------------------------------------------------------------------------------------|
| CCG017598.1 | 411  | 214  | 95 | 22.3735358 | 8.080380276 | -1.469298174 | Down | 5.44E-18 | 2.08E-17   | histone H2B OS=Aspergillus flavus (strain ATCC 200026 / FGSC A1120 / NRRL 3357 / JCM 12722 / SRR167) |
| CCG027557.1 | 2550 | 324  | 95 | 5.45968393 | 1.302367174 | -2.067681191 | Down | 7.89E-42 | 3.55E-41   | AAEL015663-PA (Fragment) OS=Aedes aegypti GN=AAEL015663 PE=3 SV=1                                    |
| CCG006077.1 | 728  | 403  | 95 | 23.7868174 | 4.56186304  | -2.382467216 | Down | 2.14E-61 | 1.04E-60   | AAEL007054-PA OS=Aedes aegypti GN=AAEL007054 PE=4 SV=1                                               |
| CCG023063.1 | 1743 | 1335 | 95 | 32.9114146 | 1.905356451 | -4.110455214 | Down | 0        | 0          | AAEL004341-PA (Fragment) OS=Aedes aegypti GN=AAEL004341 PE=4 SV=1                                    |
| CCG006431.1 | 378  | 1481 | 95 | 168.354966 | 8.7858103   | -4.260187113 | Down | 0        | 0          | AAEL009337-PA OS=Aedes aegypti GN=AAEL009337 PE=3 SV=1                                               |
| CCG006787.1 | 1290 | 1815 | 95 | 60.4574173 | 2.574446739 | -4.553585021 | Down | 0        | 0          | C(2) long form OS=Culex quinquefasciatus GN=CpipJ_CPIJ017150 PE=4 SV=1                               |
| CCG004420.1 | 477  | 0    | 96 | 0.001      | 7.03562803  | 12.78046349  | Up   | 4.44E-16 | 1.64E-15   | AAEL003584-PA OS=Aedes aegypti GN=AAEL003584 PE=4 SV=1                                               |
| CCG000295.1 | 768  | 1    | 96 | 0.05595018 | 4.369784597 | 6.287275705  | Up   | 0.000587 | 0.00091717 | AAEL004467-PA OS=Aedes aegypti GN=AAEL004467 PE=2 SV=1                                               |
| CCG020083.1 | 690  | 12   | 96 | 0.74729973 | 4.863760247 | 2.702313204  | Up   | 1.30E-07 | 2.49E-07   | AAEL011163-PA OS=Aedes aegypti GN=AAEL011163 PE=4 SV=1                                               |
| CCG018444.1 | 1752 | 12   | 96 | 0.29431325 | 1.915522015 | 2.702313204  | Up   | 1.30E-07 | 2.49E-07   | AAEL004778-PA OS=Aedes aegypti GN=AAEL004778 PE=3 SV=1                                               |
| CCG025939.1 | 951  | 14   | 96 | 0.63257233 | 3.52891122  | 2.479920782  | Up   | 3.07E-08 | 6.00E-08   | AAEL011301-PA OS=Aedes aegypti GN=AAEL011301 PE=4 SV=1                                               |
| CCG004249.1 | 1524 | 19   | 96 | 0.53571191 | 2.202096175 | 2.039348191  | Up   | 9.27E-10 | 1.91E-09   | AAEL011571-PA (Fragment) OS=Aedes aegypti GN=GPRgr14 PE=3 SV=2                                       |
| CCG014086.1 | 1977 | 21   | 96 | 0.45643117 | 1.697518751 | 1.894958282  | Up   | 1.23E-09 | 2.53E-09   | zinc finger protein OS=Culex quinquefasciatus GN=CpipJ_CPIJ018423 PE=4 SV=1                          |
| CCG010507.1 | 507  | 22   | 96 | 1.86456442 | 6.619318679 | 1.827844086  | Up   | 2.68E-09 | 5.46E-09   | AAEL010139-PA OS=Aedes aegypti GN=AAEL010139 PE=4 SV=1                                               |

|             |       |     |    |            |             |              |      |           |            |                                                                                      |
|-------------|-------|-----|----|------------|-------------|--------------|------|-----------|------------|--------------------------------------------------------------------------------------|
| CCG017837.1 | 2232  | 23  | 96 | 0.44278848 | 1.503581797 | 1.763713748  | Up   | 6.21E-09  | 1.25E-08   | AGAP003323-PA OS=Anopheles gambiae GN=AgaP_AGAP003323 PE=3 SV=5                      |
| CCG026521.1 | 1872  | 27  | 96 | 0.61975579 | 1.792732142 | 1.532388202  | Up   | 1.43E-07  | 2.73E-07   | AAEL006738-PA (Fragment) OS=Aedes aegypti GN=AAEL006738 PE=4 SV=1                    |
| CCG004164.1 | 453   | 29  | 96 | 2.75082186 | 7.408376535 | 1.429294709  | Up   | 5.80E-07  | 1.08E-06   | AAEL013800-PA OS=Aedes aegypti GN=AAEL013800 PE=4 SV=1                               |
| CCG027974.2 | 1050  | 31  | 96 | 1.26863026 | 3.196185305 | 1.333079394  | Up   | 2.12E-06  | 3.85E-06   | AAEL013490-PA OS=Aedes aegypti GN=AAEL013490 PE=4 SV=1                               |
| CCG021926.1 | 222   | 35  | 96 | 6.77450771 | 15.11709266 | 1.157992688  | Up   | 2.15E-05  | 3.69E-05   | AAEL000284-PA OS=Aedes aegypti GN=AAEL000284 PE=4 SV=1                               |
| CCG019392.1 | 663   | 37  | 96 | 2.39800932 | 5.061831931 | 1.077822339  | Up   | 6.03E-05  | 0.00010025 | AAEL007357-PA OS=Aedes aegypti GN=AAEL007357 PE=4 SV=1                               |
| CCG025199.1 | 345   | 37  | 96 | 4.60834835 | 9.727520493 | 1.077822339  | Up   | 6.03E-05  | 0.00010026 | -                                                                                    |
| CCG021354.1 | 6750  | 218 | 96 | 1.38776328 | 0.497184381 | -1.48090862  | Down | 1.69E-18  | 6.49E-18   | Tyrosine-protein kinase receptor (Fragment) OS=Aedes aegypti GN=AAEL007742 PE=3 SV=1 |
| CCG003817.1 | 381   | 264 | 96 | 29.7743043 | 8.808384699 | -1.757118415 | Down | 7.12E-28  | 2.96E-27   | AAEL013517-PA OS=Aedes aegypti GN=AAEL013517 PE=4 SV=1                               |
| CCG022483.1 | 1356  | 284 | 96 | 8.99956094 | 2.474922249 | -1.862471415 | Down | 2.98E-32  | 1.27E-31   | CG34109 OS=Drosophila melanogaster GN=CG12441 PE=2 SV=1                              |
| CCG006879.1 | 1336  | 394 | 96 | 12.6722122 | 2.511971984 | -2.334776115 | Down | 1.21E-58  | 5.82E-58   | AAEL007363-PA OS=Aedes aegypti GN=AAEL007363 PE=4 SV=1                               |
| CCG024180.1 | 1698  | 448 | 96 | 11.3371267 | 1.976439676 | -2.520079218 | Down | 1.20E-72  | 5.99E-72   | AAEL003295-PA OS=Aedes aegypti GN=AAEL003295 PE=4 SV=1                               |
| CCG004774.1 | 12210 | 927 | 96 | 3.26232137 | 0.27485623  | -3.569149824 | Down | 2.74E-211 | 1.65E-210  | AAEL010965-PA OS=Aedes aegypti GN=AAEL010965 PE=4 SV=1                               |
| CCG012510.1 | 2274  | 944 | 96 | 17.8379197 | 1.475811157 | -3.595367345 | Down | 1.73E-216 | 1.05E-215  | AAEL010921-PA OS=Aedes aegypti GN=AAEL010921 PE=4 SV=1                               |
| CCG021497.1 | 198   | 3   | 97 | 0.65105659 | 17.12602448 | 4.717263545  | Up   | 5.28E-05  | 8.86E-05   | -                                                                                    |
| CCG006525.1 | 699   | 4   | 97 | 0.24589262 | 4.851148565 | 4.302226046  | Up   | 2.95E-05  | 5.03E-05   | AAEL009218-PA OS=Aedes aegypti GN=AAEL009218 PE=3 SV=1                               |

|             |      |     |    |            |             |              |      |          |            |                                                                                       |
|-------------|------|-----|----|------------|-------------|--------------|------|----------|------------|---------------------------------------------------------------------------------------|
| CCG017977.1 | 828  | 6   | 97 | 0.31137489 | 4.09535368  | 3.717263545  | Up   | 8.38E-06 | 1.48E-05   | AAEL004104-PA OS=Aedes aegypti GN=AAEL004104 PE=4 SV=1                                |
| CCG005945.1 | 911  | 16  | 97 | 0.7546825  | 3.722231446 | 2.302226046  | Up   | 7.09E-09 | 1.42E-08   | AAEL002864-PA OS=Aedes aegypti GN=AAEL002864 PE=4 SV=1                                |
| CCG027260.1 | 789  | 25  | 97 | 1.36152518 | 4.297785611 | 1.658369856  | Up   | 2.18E-08 | 4.29E-08   | AAEL001300-PA OS=Aedes aegypti GN=AAEL001300 PE=4 SV=1                                |
| CCG008404.1 | 1464 | 27  | 97 | 0.79247461 | 2.316224622 | 1.547338544  | Up   | 1.00E-07 | 1.92E-07   | AAEL004592-PA OS=Aedes aegypti GN=AAEL004592 PE=4 SV=1                                |
| CCG007741.1 | 3610 | 27  | 97 | 0.32138029 | 0.939322118 | 1.547338544  | Up   | 1.00E-07 | 1.92E-07   | Putative uncharacterized protein OS=Tribolium castaneum GN=TcasGA2_TC009401 PE=4 SV=1 |
| CCG022108.2 | 960  | 29  | 97 | 1.29804407 | 3.532242549 | 1.444245051  | Up   | 4.12E-07 | 7.71E-07   | AAEL012479-PA OS=Aedes aegypti GN=AAEL012479 PE=4 SV=1                                |
| CCG023248.1 | 729  | 29  | 97 | 1.70935844 | 4.651512822 | 1.444245051  | Up   | 4.12E-07 | 7.71E-07   | Lupus rabnonucleoprotein OS=Culex quinquefasciatus GN=CpipJ_CPIJ008950 PE=4 SV=1      |
| CCG005198.1 | 828  | 30  | 97 | 1.55687444 | 4.09535368  | 1.39533545   | Up   | 8.04E-07 | 1.49E-06   | AAEL006410-PA OS=Aedes aegypti GN=AAEL006410 PE=4 SV=1                                |
| CCG026298.1 | 618  | 36  | 97 | 2.50309134 | 5.486978717 | 1.132301045  | Up   | 2.72E-05 | 4.65E-05   | AAEL013310-PA OS=Aedes aegypti GN=AAEL013310 PE=4 SV=1                                |
| CCG025114.1 | 861  | 38  | 97 | 1.89645751 | 3.938388905 | 1.054298533  | Up   | 7.45E-05 | 0.00012341 | AAEL003451-PA OS=Aedes aegypti GN=AAEL003451 PE=4 SV=1                                |
| CCG014777.2 | 597  | 176 | 97 | 12.6677945 | 5.679988018 | -1.157205573 | Down | 7.76E-11 | 1.67E-10   | AAEL012401-PA OS=Aedes aegypti GN=AAEL012401 PE=3 SV=1                                |
| CCG020894.1 | 637  | 196 | 97 | 13.2214568 | 5.323316871 | -1.312483798 | Down | 3.30E-14 | 1.15E-13   | AAEL000644-PA OS=Aedes aegypti GN=AAEL000644 PE=4 SV=1                                |
| CCG019222.1 | 933  | 218 | 97 | 10.040088  | 3.634461787 | -1.465958279 | Down | 3.05E-18 | 1.17E-17   | AAEL001338-PA OS=Aedes aegypti GN=AAEL001338 PE=4 SV=1                                |
| CCG004072.1 | 1131 | 499 | 97 | 18.9583533 | 2.998189962 | -2.660669959 | Down | 8.44E-86 | 4.34E-85   | AAEL013372-PA OS=Aedes aegypti GN=AAEL013372 PE=3 SV=1                                |
| CCG013757.1 | 1398 | 506 | 97 | 15.5527079 | 2.425574282 | -2.680767529 | Down | 1.06E-87 | 5.46E-87   | AAEL005261-PA OS=Aedes aegypti GN=AAEL005261 PE=4 SV=1                                |



|             |      |     |    |            |             |              |      |          |            |                                                                                                   |
|-------------|------|-----|----|------------|-------------|--------------|------|----------|------------|---------------------------------------------------------------------------------------------------|
| CCG018126.1 | 528  | 0   | 98 | 0.001      | 6.488468037 | 12.66366217  | Up   | 4.44E-16 | 1.63E-15   | 60S ribosomal protein L17<br>OS=Culex quinquefasciatus<br>GN=CpipJ_CPIJ015624 PE=3<br>SV=1        |
| CCG025877.1 | 486  | 2   | 98 | 0.17683018 | 7.049199843 | 5.317023048  | Up   | 9.36E-05 | 0.00015338 | AAEL009296-PA OS=Aedes<br>aegypti GN=AAEL009296 PE=4<br>SV=1                                      |
| CCG025157.1 | 633  | 2   | 98 | 0.13576535 | 5.41218187  | 5.317023048  | Up   | 9.36E-05 | 0.00015386 | AGAP010064-PA OS=Anopheles<br>gambiae GN=AGAP010064 PE=4<br>SV=1                                  |
| CCG026742.1 | 984  | 15  | 98 | 0.65502644 | 3.481616996 | 2.410132452  | Up   | 1.48E-08 | 2.92E-08   | AAEL008970-PA OS=Aedes<br>aegypti GN=AAEL008970 PE=4<br>SV=1                                      |
| CCG027744.1 | 378  | 15  | 98 | 1.7051482  | 9.063256941 | 2.410132452  | Up   | 1.48E-08 | 2.92E-08   | AAEL009836-PA OS=Aedes<br>aegypti GN=AAEL009836 PE=4<br>SV=1                                      |
| CCG003357.1 | 2136 | 16  | 98 | 0.32187067 | 1.603890976 | 2.317023048  | Up   | 7.09E-09 | 1.42E-08   | N-acetylglucosaminyltransferase<br>OS=Culex quinquefasciatus<br>GN=CpipJ_CPIJ005697 PE=3<br>SV=1  |
| CCG028571.1 | 1821 | 16  | 98 | 0.37754846 | 1.881335049 | 2.317023048  | Up   | 7.09E-09 | 1.42E-08   | AAEL006453-PA OS=Aedes<br>aegypti GN=AAEL006453 PE=4<br>SV=1                                      |
| CCG001908.1 | 420  | 26  | 98 | 2.66003119 | 8.156931247 | 1.61658333   | Up   | 3.29E-08 | 6.43E-08   | AAEL007556-PA OS=Aedes<br>aegypti GN=AAEL007556 PE=4<br>SV=1                                      |
| CCG028531.1 | 2480 | 28  | 98 | 0.48514216 | 1.381415776 | 1.509668126  | Up   | 1.45E-07 | 2.76E-07   | GK25464 OS=Drosophila willistoni<br>GN=GK25464 PE=4 SV=1                                          |
| CCG017581.1 | 216  | 36  | 98 | 7.16162244 | 15.86069965 | 1.147098046  | Up   | 2.03E-05 | 3.49E-05   | AAEL002121-PA OS=Aedes<br>aegypti GN=AAEL002121 PE=4<br>SV=1                                      |
| CCG011130.1 | 1393 | 37  | 98 | 1.14133538 | 2.459376255 | 1.107569682  | Up   | 3.42E-05 | 5.78E-05   | AAEL003776-PA OS=Aedes<br>aegypti GN=AAEL003776 PE=4<br>SV=1                                      |
| CCG028433.1 | 1722 | 164 | 98 | 4.09235568 | 1.989495426 | -1.040528957 | Down | 8.50E-09 | 1.70E-08   | AAEL005440-PA OS=Aedes<br>aegypti GN=AAEL005440 PE=4<br>SV=1                                      |
| CCG003966.1 | 1689 | 214 | 98 | 5.44435951 | 2.028366562 | -1.424443938 | Down | 3.09E-17 | 1.17E-16   | Putative uncharacterized protein<br>OS=Culex quinquefasciatus<br>GN=CpipJ_CPIJ003199 PE=4<br>SV=1 |
| CCG011736.1 | 1689 | 293 | 98 | 7.45419316 | 2.028366562 | -1.877733806 | Down | 1.41E-33 | 6.04E-33   | AAEL006905-PA OS=Aedes<br>aegypti GN=AAEL006905 PE=4<br>SV=1                                      |
| CCG019211.1 | 675  | 365 | 98 | 23.2354861 | 5.075423887 | -2.194729606 | Down | 1.57E-50 | 7.35E-50   | -                                                                                                 |
| CCG018415.1 | 2046 | 475 | 98 | 9.97586703 | 1.674443364 | -2.574760655 | Down | 8.09E-79 | 4.10E-78   | AAEL000471-PA OS=Aedes<br>aegypti GN=AAEL000471 PE=4<br>SV=1                                      |

|             |      |     |    |            |             |              |      |           |           |                                                                            |
|-------------|------|-----|----|------------|-------------|--------------|------|-----------|-----------|----------------------------------------------------------------------------|
| CCG003745.1 | 936  | 479 | 98 | 21.9898535 | 3.660161457 | -2.586858798 | Down | 6.89E-80  | 3.50E-79  | AAEL008646-PA (Fragment)<br>OS=Aedes aegypti<br>GN=AAEL008646 PE=4 SV=1    |
| CCG002448.1 | 894  | 667 | 98 | 32.0590749 | 3.832115351 | -3.064519903 | Down | 2.10E-132 | 1.17E-131 | AGAP000342-PA OS=Anopheles<br>gambiae GN=AgaP_AGAP000342<br>PE=3 SV=1      |
| CCG008959.2 | 804  | 833 | 98 | 44.519638  | 4.261083487 | -3.385149637 | Down | 2.45E-181 | 1.44E-180 | Carbonic anhydrase OS=Aedes<br>aegypti PE=2 SV=1                           |
| CCG025683.1 | 841  | 4   | 99 | 0.20437448 | 4.115183592 | 4.331669824  | Up   | 2.95E-05  | 5.04E-05  | -                                                                          |
| CCG004651.1 | 850  | 7   | 99 | 0.3538684  | 4.071611059 | 3.524314902  | Up   | 4.31E-06  | 7.69E-06  | AAEL001997-PA OS=Aedes<br>aegypti GN=AAEL001997 PE=4<br>SV=1               |
| CCG010806.1 | 1587 | 9   | 99 | 0.2436847  | 2.180762067 | 3.161744822  | Up   | 1.09E-06  | 2.01E-06  | AAEL013562-PA OS=Aedes<br>aegypti GN=AAEL013562 PE=4<br>SV=1               |
| CCG010518.1 | 2164 | 9   | 99 | 0.17870962 | 1.599292699 | 3.161744822  | Up   | 1.09E-06  | 2.01E-06  | Uncharacterized protein<br>OS=Danaus plexippus<br>GN=KGM_14575 PE=4 SV=1   |
| CCG020532.1 | 1632 | 13  | 99 | 0.34228343 | 2.12063076  | 2.631230106  | Up   | 6.34E-08  | 1.22E-07  | AAEL002075-PA OS=Aedes<br>aegypti GN=AAEL002075 PE=4<br>SV=1               |
| CCG021581.1 | 783  | 13  | 99 | 0.71341833 | 4.420012006 | 2.631230106  | Up   | 6.34E-08  | 1.23E-07  | AAEL002020-PA OS=Aedes<br>aegypti GN=AAEL002820 PE=4<br>SV=1               |
| CCG024467.1 | 504  | 19  | 99 | 1.61989079 | 6.866804366 | 2.08374231   | Up   | 8.17E-10  | 1.69E-09  | -                                                                          |
| CCG010612.1 | 999  | 34  | 99 | 1.46243341 | 3.464333734 | 1.244206983  | Up   | 4.95E-06  | 8.81E-06  | Uncharacterized protein<br>OS=Anopheles darlingi<br>GN=AND_13575 PE=4 SV=1 |
| CCG020741.1 | 1462 | 34  | 99 | 0.99929615 | 2.367215732 | 1.244206983  | Up   | 4.95E-06  | 8.81E-06  | AAEL006184-PA OS=Aedes<br>aegypti GN=AAEL006184 PE=4<br>SV=1               |
| CCG004841.1 | 711  | 164 | 99 | 9.91144371 | 4.867608158 | -1.025882181 | Down | 1.26E-08  | 2.51E-08  | AAEL004588-PA OS=Aedes<br>aegypti GN=AAEL004588 PE=4<br>SV=1               |
| CCG022519.1 | 1016 | 172 | 99 | 7.27440389 | 3.40636752  | -1.094594931 | Down | 7.88E-10  | 1.63E-09  | Putative gag-pol polyprotein<br>OS=Aster yellows phytoplasma<br>PE=4 SV=1  |
| CCG021740.1 | 237  | 172 | 99 | 31.1847863 | 14.60282447 | -1.094594931 | Down | 7.88E-10  | 1.63E-09  | AAEL009810-PA OS=Aedes<br>aegypti GN=AAEL009810 PE=2<br>SV=1               |
| CCG005543.1 | 1641 | 177 | 99 | 4.63476114 | 2.109000244 | -1.135935726 | Down | 1.30E-10  | 2.78E-10  | AAEL001867-PA OS=Aedes<br>aegypti GN=AAEL001867 PE=4<br>SV=1               |

|             |      |     |     |            |             |              |      |           |            |                                                                                                         |
|-------------|------|-----|-----|------------|-------------|--------------|------|-----------|------------|---------------------------------------------------------------------------------------------------------|
| CCG001289.1 | 816  | 222 | 99  | 11.6902954 | 4.24126152  | -1.462746042 | Down | 1.71E-18  | 6.59E-18   | Salivary chymotrypsin-like enzyme<br>OS=Aedes aegypti PE=2 SV=1                                         |
| CCG013771.1 | 3555 | 300 | 99  | 3.62613794 | 0.973521632 | -1.897148867 | Down | 8.34E-35  | 3.61E-34   | Putative uncharacterized protein<br>OS=Amoebophilus asiaticus<br>(strain 5a2) GN=Aasi_1435 PE=4<br>SV=1 |
| CCG023402.1 | 885  | 542 | 99  | 26.3159279 | 3.910586893 | -2.750479217 | Down | 1.76E-96  | 9.28E-96   | AAEL010943-PA OS=Aedes<br>aegypti GN=AAEL010943 PE=4<br>SV=1                                            |
| CCG015182.1 | 1257 | 2   | 100 | 0.06836871 | 2.781088049 | 5.346169394  | Up   | 9.36E-05  | 0.00015397 | AAEL000429-PA OS=Aedes<br>aegypti GN=AAEL000429 PE=4<br>SV=1                                            |
| CCG013739.1 | 927  | 6   | 100 | 0.27812126 | 3.771119393 | 3.761206893  | Up   | 8.38E-06  | 1.48E-05   | AAEL000894-PA OS=Aedes<br>aegypti GN=AAEL008945 PE=4<br>SV=1                                            |
| CCG007526.1 | 366  | 6   | 100 | 0.70442188 | 9.551441741 | 3.761206893  | Up   | 8.38E-06  | 1.48E-05   | AAEL007344-PA OS=Aedes<br>aegypti GN=AAEL007344 PE=4<br>SV=1                                            |
| CCG026559.1 | 1407 | 13  | 100 | 0.39701958 | 2.484596786 | 2.645729675  | Up   | 6.34E-08  | 1.23E-07   | AAEL005737-PA OS=Aedes<br>aegypti GN=AAEL005737 PE=4<br>SV=1                                            |
| CCG026719.1 | 1077 | 15  | 100 | 0.59846427 | 3.245893851 | 2.439278798  | Up   | 1.48E-08  | 2.92E-08   | AAEL004309-PA OS=Aedes<br>aegypti GN=AAEL004309 PE=4<br>SV=1                                            |
| CCG001725.1 | 1905 | 20  | 100 | 0.45112582 | 1.835080146 | 2.024241299  | Up   | 4.46E-10  | 9.31E-10   | Putative uncharacterized protein<br>OS=Culex quinquefasciatus<br>GN=CpipJ_CPIJ014911 PE=4<br>SV=1       |
| CCG015555.1 | 1911 | 23  | 100 | 0.51716583 | 1.829318512 | 1.822607438  | Up   | 1.33E-09  | 2.74E-09   | -                                                                                                       |
| CCG011021.1 | 888  | 26  | 100 | 1.25812286 | 3.93674288  | 1.645729675  | Up   | 1.57E-08  | 3.11E-08   | Lipase OS=Aedes aegypti<br>GN=AAEL004933 PE=3 SV=1                                                      |
| CCG010317.1 | 837  | 40  | 100 | 2.05351181 | 4.176616102 | 1.024241299  | Up   | 8.52E-05  | 0.00014049 | AAEL004147-PA OS=Aedes<br>aegypti GN=AAEL004147 PE=4<br>SV=1                                            |
| CCG004822.1 | 1242 | 186 | 100 | 6.43508103 | 2.814676069 | -1.192989418 | Down | 7.23E-12  | 1.62E-11   | AAEL000387-PA OS=Aedes<br>aegypti GN=AAEL000387 PE=4<br>SV=1                                            |
| CCG015655.1 | 1509 | 290 | 100 | 8.25793442 | 2.316651874 | -1.833739696 | Down | 3.10E-32  | 1.32E-31   | AAEL012617-PA OS=Aedes<br>aegypti GN=AAEL012617 PE=4<br>SV=1                                            |
| CCG020458.1 | 951  | 322 | 100 | 14.5491636 | 3.675949187 | -1.984747485 | Down | 1.78E-39  | 7.94E-39   | AAEL011460-PA OS=Aedes<br>aegypti GN=AAEL011460 PE=4<br>SV=1                                            |
| CCG025367.1 | 1260 | 969 | 100 | 33.0457721 | 2.77446641  | -3.574183462 | Down | 4.79E-221 | 2.90E-220  | AAEL006607-PA OS=Aedes<br>aegypti GN=AAEL006607 PE=4<br>SV=1                                            |
| CCG025837.1 | 273  | 0   | 101 | 0.001      | 12.93328188 | 13.65880079  | Up   | 4.44E-16  | 1.65E-15   | -                                                                                                       |

|             |      |     |     |            |             |              |      |           |           |                                                                                          |
|-------------|------|-----|-----|------------|-------------|--------------|------|-----------|-----------|------------------------------------------------------------------------------------------|
| CCG027905.1 | 2061 | 19  | 101 | 0.3961305  | 1.713142142 | 2.112597173  | Up   | 7.92E-10  | 1.64E-09  | AAEL013492-PA OS=Aedes aegypti GN=PPO5 PE=4 SV=1                                         |
| CCG007302.1 | 478  | 35  | 101 | 3.14631948 | 7.386581494 | 1.23124167   | Up   | 4.74E-06  | 8.44E-06  | -                                                                                        |
| CCG015995.1 | 1170 | 186 | 101 | 6.83108602 | 3.017765773 | -1.178634125 | Down | 1.14E-11  | 2.54E-11  | AAEL014372-PA OS=Aedes aegypti GN=AAEL014372 PE=4 SV=1                                   |
| CCG011315.1 | 900  | 208 | 101 | 9.93078311 | 3.923095504 | -1.339915032 | Down | 1.99E-15  | 7.23E-15  | AAEL002673-PA OS=Aedes aegypti GN=AAEL002673 PE=4 SV=1                                   |
| CCG015824.1 | 1644 | 233 | 101 | 6.0899928  | 2.147680021 | -1.503661458 | Down | 4.39E-20  | 1.71E-19  | -                                                                                        |
| CCG017113.1 | 3342 | 286 | 101 | 3.6772424  | 1.056488915 | -1.79934665  | Down | 5.00E-31  | 2.12E-30  | AAEL000489-PA OS=Aedes aegypti GN=AAEL000489 PE=4 SV=1                                   |
| CCG012113.1 | 513  | 297 | 101 | 24.8772148 | 6.882623692 | -1.853794434 | Down | 1.90E-33  | 8.14E-33  | AAEL005317-PB (Fragment) OS=Aedes aegypti GN=AAEL005317 PE=4 SV=1                        |
| CCG001935.1 | 863  | 566 | 101 | 28.1817726 | 4.09129311  | -2.784133556 | Down | 5.33E-102 | 2.83E-101 | Hydroxypyruvate isomerase OS=Aedes aegypti GN=AAEL002165 PE=3 SV=1                       |
| CCG027572.1 | 3246 | 858 | 101 | 11.357989  | 1.087734428 | -3.384309151 | Down | 1.11E-186 | 6.54E-186 | Putative uncharacterized protein OS=Culex quinquefasciatus GN=CpipJ_CPIJ010658 PE=4 SV=1 |
| CCG007744.1 | 1461 | 0   | 102 | 0.001      | 2.440618912 | 11.25303133  | Up   | 4.44E-16  | 1.63E-15  | AAEL000058-PA OS=Aedes aegypti GN=CYP325Q2 PE=3 SV=1                                     |
| CCG026725.1 | 516  | 3   | 102 | 0.24982404 | 6.910357036 | 4.789776045  | Up   | 5.28E-05  | 8.85E-05  | Fibrinogen and fibronectin OS=Culex quinquefasciatus GN=CpipJ_CPIJ018858 PE=4 SV=1       |
| CCG026303.1 | 1416 | 4   | 102 | 0.12138343 | 2.518180954 | 4.374738546  | Up   | 2.95E-05  | 5.03E-05  | AGAP007008-PA OS=Anopheles gambiae GN=AgaP_AGAP007008 PE=4 SV=3                          |
| CCG024271.1 | 981  | 4   | 102 | 0.17520789 | 3.634805536 | 4.374738546  | Up   | 2.95E-05  | 5.04E-05  | AAEL008043-PA OS=Aedes aegypti GN=PNRLIKE PE=2 SV=2                                      |
| CCG017213.1 | 987  | 5   | 102 | 0.21767849 | 3.612709454 | 4.052810451  | Up   | 1.59E-05  | 2.76E-05  | AAEL015060-PA (Fragment) OS=Aedes aegypti GN=AAEL015060 PE=4 SV=1                        |
| CCG028090.1 | 381  | 5   | 102 | 0.56390728 | 9.358908742 | 4.052810451  | Up   | 1.59E-05  | 2.76E-05  | AAEL005909-PA OS=Aedes aegypti GN=AAEL005909 PE=4 SV=1                                   |

|             |       |      |     |            |             |              |      |           |           |                                                                      |
|-------------|-------|------|-----|------------|-------------|--------------|------|-----------|-----------|----------------------------------------------------------------------|
| CCG012305.1 | 680   | 8    | 102 | 0.50552629 | 5.243741516 | 3.374738546  | Up   | 2.19E-06  | 3.96E-06  | AAEL005746-PA OS=Aedes aegypti GN=CYP9AE1 PE=3 SV=1                  |
| CCG014116.1 | 633   | 8    | 102 | 0.54306142 | 5.633087252 | 3.374738546  | Up   | 2.19E-06  | 3.96E-06  | AAEL001246-PA OS=Aedes aegypti GN=AAEL001246 PE=3 SV=1               |
| CCG011735.1 | 540   | 18   | 102 | 1.43232449 | 6.603230057 | 2.204813544  | Up   | 1.63E-09  | 3.33E-09  | AAEL0008910-PA OS=Aedes aegypti GN=AAEL008910 PE=4 SV=1              |
| CCG016690.1 | 2481  | 18   | 102 | 0.3117514  | 1.437220569 | 2.204813544  | Up   | 1.63E-09  | 3.33E-09  | AAEL0008045-PA OS=Aedes aegypti GN=AAEL008045 PE=4 SV=1              |
| CCG023501.1 | 1053  | 28   | 102 | 1.14259503 | 3.386271824 | 1.567383624  | Up   | 3.49E-08  | 6.82E-08  | AAEL002675-PA OS=Aedes aegypti GN=AAEL002675 PE=4 SV=1               |
| CCG021208.1 | 507   | 30   | 102 | 2.54258785 | 7.033026096 | 1.46784795   | Up   | 1.47E-07  | 2.79E-07  | -                                                                    |
| CCG025889.1 | 1197  | 31   | 102 | 1.11283356 | 2.978900778 | 1.420542235  | Up   | 2.89E-07  | 5.43E-07  | AAEL005468-PA OS=Aedes aegypti GN=AAEL005468 PE=4 SV=1               |
| CCG019611.1 | 1062  | 192  | 102 | 7.76853959 | 3.357574605 | -1.210223955 | Down | 1.88E-12  | 4.50E-12  | AAEL004825-PA OS=Aedes aegypti GN=AAEL004825 PE=4 SV=1               |
| CCG016169.1 | 2378  | 241  | 102 | 4.35479648 | 1.499471922 | -1.53815079  | Down | 2.23E-21  | 8.80E-21  | AAEL008427-PA OS=Aedes aegypti GN=AAEL008427 PE=4 SV=1               |
| CCG014600.1 | 1281  | 248  | 102 | 8.31888695 | 2.783563022 | -1.579457765 | Down | 9.11E-23  | 3.64E-22  | AAEL001095-PA OS=Aedes aegypti GN=AAEL001095 PE=4 SV=1               |
| CCG026669.1 | 948   | 255  | 102 | 11.5583147 | 3.761333577 | -1.619614891 | Down | 3.52E-24  | 1.42E-23  | AAEL000139-PA OS=Aedes aegypti GN=AAEL000139 PE=4 SV=1               |
| CCG018497.1 | 1477  | 296  | 102 | 8.61140247 | 2.414180251 | -1.83471482  | Down | 6.85E-33  | 2.93E-32  | AAEL011086-PA OS=Aedes aegypti GN=AAEL011086 PE=4 SV=2               |
| CCG018194.1 | 1590  | 324  | 102 | 8.75609686 | 2.242606434 | -1.965111457 | Down | 3.31E-39  | 1.47E-38  | AAEL002669-PA OS=Aedes aegypti GN=AAEL002669 PE=4 SV=1               |
| CCG010182.1 | 1566  | 406  | 102 | 11.1403016 | 2.276975882 | -2.290597371 | Down | 5.21E-59  | 2.50E-58  | AAEL000467-PA OS=Aedes aegypti GN=AAEL006467 PE=3 SV=1               |
| CCG022799.1 | 1788  | 582  | 102 | 13.9867928 | 1.994264111 | -2.810136797 | Down | 7.03E-106 | 3.75E-105 | AAEL005753-PA OS=Aedes aegypti GN=AAEL005753 PE=3 SV=1               |
| CCG028627.1 | 11511 | 907  | 102 | 3.38576573 | 0.309768415 | -3.450220195 | Down | 1.05E-200 | 6.29E-200 | AAEL010965-PA OS=Aedes aegypti GN=AAEL010965 PE=4 SV=1               |
| CCG011343.1 | 2271  | 7908 | 102 | 149.627768 | 1.570120753 | -6.57435861  | Down | 0         | 0         | Uncharacterized protein OS=Anopheles darlingi GN=AND_22379 PE=4 SV=1 |

|             |      |      |     |            |             |              |      |          |            |                                                                                           |
|-------------|------|------|-----|------------|-------------|--------------|------|----------|------------|-------------------------------------------------------------------------------------------|
| CCG017579.1 | 468  | 6    | 103 | 0.55089403 | 7.693808777 | 3.80385123   | Up   | 8.38E-06 | 1.48E-05   | AAEL005379-PA OS=Aedes aegypti GN=AAEL005379 PE=4 SV=1                                    |
| CCG006440.1 | 582  | 8    | 103 | 0.59064927 | 6.186774068 | 3.388813731  | Up   | 2.19E-06 | 3.97E-06   | -                                                                                         |
| CCG004083.1 | 1533 | 9    | 103 | 0.2522685  | 2.348794852 | 3.21888873   | Up   | 1.09E-06 | 2.01E-06   | AAEL005737-PA OS=Aedes aegypti GN=AAEL005737 PE=4 SV=1                                    |
| CCG001464.1 | 453  | 12   | 103 | 1.13827112 | 7.948570657 | 2.80385123   | Up   | 1.30E-07 | 2.49E-07   | -                                                                                         |
| CCG018428.1 | 462  | 14   | 103 | 1.30211317 | 7.793728371 | 2.581458809  | Up   | 3.07E-08 | 6.01E-08   | AAEL006566-PA OS=Aedes aegypti GN=AAEL006566 PE=4 SV=1                                    |
| CCG007586.1 | 1200 | 16   | 103 | 0.57292979 | 3.000585423 | 2.388813731  | Up   | 7.09E-09 | 1.42E-08   | AAEL004138-PA OS=Aedes aegypti GN=AAEL004138 PE=4 SV=1                                    |
| CCG015063.1 | 591  | 19   | 103 | 1.38142971 | 6.092559234 | 2.140886218  | Up   | 7.81E-10 | 1.62E-09   | -                                                                                         |
| CCG012177.1 | 817  | 22   | 103 | 1.15707976 | 4.407224611 | 1.929382112  | Up   | 2.40E-10 | 5.06E-10   | moduler of mdg4 OS=Culex quinquefasciatus GN=CpipJ_CPIJ001643 PE=4 SV=1                   |
| CCG012228.1 | 1371 | 27   | 103 | 0.8462311  | 2.626332974 | 1.633926229  | Up   | 1.13E-08 | 2.25E-08   | AAEL009303-PA OS=Aedes aegypti GN=AAEL009303 PE=4 SV=1                                    |
| CCG004270.1 | 2257 | 30   | 103 | 0.57115287 | 1.595348918 | 1.481923135  | Up   | 1.04E-07 | 1.99E-07   | Putative uncharacterized protein (Fragment) OS=Solenopsis invicta GN=SINV_11683 PE=4 SV=1 |
| CCG004442.1 | 1887 | 200  | 103 | 4.5542909  | 1.908162431 | -1.255042459 | Down | 1.37E-13 | 4.14E-13   | AAEL010471-PA OS=Aedes aegypti GN=AAEL010471 PE=3 SV=1                                    |
| CCG027430.1 | 568  | 233  | 103 | 17.6266693 | 6.339264978 | -1.475372414 | Down | 1.45E-19 | 5.64E-19   | Glutaredoxin OS=Aedes aegypti GN=AAEL001109 PE=3 SV=1                                     |
| CCG000659.1 | 1893 | 270  | 103 | 6.12880525 | 1.902114373 | -1.688001866 | Down | 5.56E-27 | 2.30E-26   | AAEL001796-PA OS=Aedes aegypti GN=AAEL001796 PE=3 SV=1                                    |
| CCG009458.1 | 1245 | 342  | 103 | 11.8037343 | 2.892130528 | -2.029038784 | Down | 5.08E-43 | 2.30E-42   | Putative uncharacterized protein OS=Culex quinquefasciatus GN=CpipJ_CPIJ010424 PE=3 SV=1  |
| CCG000389.2 | 1662 | 347  | 103 | 8.97141872 | 2.16648767  | -2.049978122 | Down | 3.38E-44 | 1.54E-43   | AAEL010381-PA OS=Aedes aegypti GN=AAEL010381 PE=3 SV=1                                    |
| CCG005542.1 | 981  | 491  | 103 | 21.5067683 | 3.670440884 | -2.550765483 | Down | 1.48E-80 | 7.53E-80   | AAEL001878-PA OS=Aedes aegypti GN=AAEL001878 PE=3 SV=1                                    |
| CCG011040.1 | 1731 | 3880 | 103 | 96.3157541 | 2.080128543 | -5.533027206 | Down | 0        | 0          | AAEL013303-PA OS=Aedes aegypti GN=AAEL013303 PE=4 SV=1                                    |
| CCG018637.1 | 675  | 2    | 104 | 0.12731773 | 5.386164125 | 5.402752922  | Up   | 9.36E-05 | 0.00015366 | -                                                                                         |

|             |      |     |     |            |             |              |      |          |          |                                                                      |
|-------------|------|-----|-----|------------|-------------|--------------|------|----------|----------|----------------------------------------------------------------------|
| CCG025955.1 | 723  | 8   | 104 | 0.47546041 | 5.028576465 | 3.402752922  | Up   | 2.19E-06 | 3.96E-06 | 40S ribosomal protein S4 (Fragment) OS=Aedes triseriatus PE=2 SV=1   |
| CCG028331.1 | 2001 | 8   | 104 | 0.17179304 | 1.816921931 | 3.402752922  | Up   | 2.19E-06 | 3.97E-06 | AAEL000033-PA OS=Aedes aegypti GN=AAEL000033 PE=4 SV=1               |
| CCG015371.1 | 323  | 9   | 104 | 1.19729911 | 11.25591574 | 3.232827921  | Up   | 1.09E-06 | 2.01E-06 | -                                                                    |
| CCG025032.1 | 1524 | 13  | 104 | 0.36653973 | 2.385604189 | 2.702313204  | Up   | 6.34E-08 | 1.23E-07 | AAEL003580-PA OS=Aedes aegypti GN=CYP4H28 PE=3 SV=2                  |
| CCG028139.1 | 1265 | 21  | 104 | 0.71333156 | 2.874040146 | 2.010435499  | Up   | 2.15E-10 | 4.54E-10 | Uncharacterized protein OS=Anopheles darlingi GN=AND_19488 PE=4 SV=1 |
| CCG025533.1 | 655  | 23  | 104 | 1.50886091 | 5.550627152 | 1.879190966  | Up   | 3.03E-10 | 6.36E-10 | AAEL004640-PA OS=Aedes aegypti GN=AAEL004640 PE=4 SV=1               |
| CCG011219.1 | 1911 | 24  | 104 | 0.5396513  | 1.902491253 | 1.817790421  | Up   | 6.63E-10 | 1.38E-09 | AAEL009923-PA (Fragment) OS=Aedes aegypti GN=AAEL009923 PE=4 SV=1    |
| CCG020754.1 | 949  | 24  | 104 | 1.08669508 | 3.83104403  | 1.817790421  | Up   | 6.63E-10 | 1.38E-09 | -                                                                    |
| CCG005380.1 | 2689 | 29  | 104 | 0.46341477 | 1.352049381 | 1.544771927  | Up   | 3.56E-08 | 6.96E-08 | GF20629 OS=Drosophila ananassae GN=GF20629 PE=4 SV=1                 |
| CCG013864.1 | 1412 | 38  | 104 | 1.15640929 | 2.574830584 | 1.154825409  | Up   | 1.01E-05 | 1.76E-05 | AAEL009143-PA OS=Aedes aegypti GN=AAEL009143 PE=4 SV=1               |
| CCG027650.1 | 1113 | 40  | 104 | 1.54428516 | 3.266541585 | 1.080824827  | Up   | 2.82E-05 | 4.82E-05 | AAEL014959-PA OS=Aedes aegypti GN=AAEL014959 PE=4 SV=1               |
| CCG000970.1 | 2198 | 229 | 104 | 4.47682858 | 1.65407679  | -1.436450866 | Down | 1.49E-18 | 5.72E-18 | AAEL011697-PA OS=Aedes aegypti GN=AAEL011697 PE=3 SV=1               |
| CCG000958.1 | 952  | 232 | 104 | 10.471616  | 3.818971412 | -1.455228073 | Down | 4.05E-19 | 1.56E-18 | -                                                                    |
| CCG016141.1 | 1191 | 356 | 104 | 12.8440181 | 3.05261191  | -2.072980509 | Down | 6.06E-46 | 2.78E-45 | AAEL005935-PA OS=Aedes aegypti GN=AAEL005935 PE=4 SV=1               |
| CCG009963.1 | 1436 | 379 | 104 | 11.3408979 | 2.531797204 | -2.163301116 | Down | 1.77E-51 | 8.31E-51 | Membrane glycoprotein LIG-1 (Fragment) OS=Aedes aegypti PE=2 SV=1    |
| CCG014357.1 | 1752 | 431 | 104 | 10.5707509 | 2.075148849 | -2.348791137 | Down | 1.91E-64 | 9.31E-64 | AAEL014765-PA OS=Aedes aegypti GN=AAEL014765 PE=4 SV=1               |

|             |      |       |     |            |             |              |      |           |           |                                                                                          |
|-------------|------|-------|-----|------------|-------------|--------------|------|-----------|-----------|------------------------------------------------------------------------------------------|
| CCG024981.1 | 1191 | 558   | 104 | 20.131916  | 3.05261191  | -2.72136839  | Down | 3.89E-98  | 2.05E-97  | AAEL013452-PA OS=Aedes aegypti GN=AAEL013452 PE=4 SV=1                                   |
| CCG003655.1 | 591  | 0     | 105 | 0.001      | 6.210861355 | 12.60057765  | Up   | 4.44E-16  | 1.66E-15  | Angiopoietin-like protein 2 (Fragment) OS=Aedes albopictus PE=2 SV=1                     |
| CCG003332.1 | 1017 | 0     | 105 | 0.001      | 3.609261614 | 11.817488    | Up   | 4.44E-16  | 1.63E-15  | AAEL009198-PA OS=Aedes aegypti GN=AAEL009198 PE=4 SV=1                                   |
| CCG016674.1 | 507  | 7     | 105 | 0.5932705  | 7.239879805 | 3.609203799  | Up   | 4.31E-06  | 7.70E-06  | AAEL000463-PA OS=Aedes aegypti GN=AAEL000463 PE=4 SV=1                                   |
| CCG014883.1 | 596  | 12    | 105 | 0.86516244 | 6.158756814 | 2.831596221  | Up   | 1.30E-07  | 2.49E-07  | -                                                                                        |
| CCG011862.1 | 1368 | 26    | 105 | 0.81667624 | 2.683201068 | 1.716119003  | Up   | 2.40E-09  | 4.90E-09  | AAEL001541-PA OS=Aedes aegypti GN=AAEL001541 PE=4 SV=1                                   |
| CCG012949.1 | 1911 | 184   | 105 | 4.13732662 | 1.920784438 | -1.107003235 | Down | 1.39E-10  | 2.96E-10  | AAEL006583-PA OS=Aedes aegypti GN=AAEL006583 PE=4 SV=1                                   |
| CCG024147.1 | 1855 | 219   | 105 | 5.07297675 | 1.978770383 | -1.358228338 | Down | 1.79E-16  | 6.72E-16  | AAEL011677-PA OS=Aedes aegypti GN=AAEL011677 PE=4 SV=1                                   |
| CCG026869.2 | 3795 | 235   | 105 | 2.66083996 | 0.967225049 | -1.459958225 | Down | 1.96E-19  | 7.61E-19  | AAEL011178-PA OS=Aedes aegypti GN=AAEL011178 PE=4 SV=1                                   |
| CCG018352.1 | 201  | 240   | 105 | 51.3071458 | 18.26178637 | -1.490331874 | Down | 2.18E-20  | 8.53E-20  | AGAP011555-PA OS=Anopheles gambiae GN=AGAP011555 PE=4 SV=3                               |
| CCG008965.1 | 930  | 291   | 105 | 13.4453686 | 3.946902216 | -1.768316621 | Down | 8.05E-31  | 3.41E-30  | AAEL009324-PA OS=Aedes aegypti GN=AAEL009324 PE=3 SV=1                                   |
| CCG012614.1 | 705  | 325   | 105 | 19.8087429 | 5.20655186  | -1.927737186 | Down | 2.33E-38  | 1.03E-37  | AAEL000168-PA OS=Aedes aegypti GN=AAEL000168 PE=4 SV=1                                   |
| CCG006126.1 | 342  | 1232  | 105 | 154.791559 | 10.73280427 | -3.850227819 | Down | 2.23E-298 | 1.41E-297 | -                                                                                        |
| CCG017807.1 | 426  | 13585 | 105 | 1370.29072 | 8.616476669 | -7.313168224 | Down | 0         | 0         | AAEL004249-PA OS=Aedes aegypti GN=AAEL004249 PE=4 SV=1                                   |
| CCG017814.1 | 474  | 4     | 106 | 0.36261379 | 7.817673709 | 4.430233658  | Up   | 2.95E-05  | 5.04E-05  | Putative uncharacterized protein OS=Culex quinquefasciatus GN=CpipJ_CPIJ017096 PE=4 SV=1 |
| CCG016672.1 | 351  | 5     | 106 | 0.61210448 | 10.55720039 | 4.108305563  | Up   | 1.59E-05  | 2.76E-05  | AAEL000456-PA OS=Aedes aegypti GN=AAEL000456 PE=4 SV=1                                   |
| CCG012572.1 | 946  | 5     | 106 | 0.22711276 | 3.91710078  | 4.108305563  | Up   | 1.59E-05  | 2.76E-05  | AAEL005399-PA OS=Aedes aegypti GN=AAEL005399 PE=4 SV=1                                   |



|             |      |     |     |            |             |              |      |           |           |                                                                          |
|-------------|------|-----|-----|------------|-------------|--------------|------|-----------|-----------|--------------------------------------------------------------------------|
| CCG019188.1 | 2019 | 11  | 106 | 0.2341095  | 1.835352817 | 2.97080204   | Up   | 2.67E-07  | 5.04E-07  | Proaccrosin OS=Culex quinquefasciatus GN=CpipJ_CPIJ012481 PE=3 SV=1      |
| CCG005420.1 | 1140 | 12  | 106 | 0.452313   | 3.250506437 | 2.845271158  | Up   | 1.30E-07  | 2.49E-07  | AAEL010472-PA OS=Aedes aegypti GN=AAEL010472 PE=4 SV=1                   |
| CCG003608.1 | 839  | 17  | 106 | 0.87066208 | 4.416659521 | 2.342770817  | Up   | 3.39E-09  | 6.88E-09  | Late trypsin OS=Aedes albopictus PE=3 SV=1                               |
| CCG019215.1 | 956  | 19  | 106 | 0.854001   | 3.876126922 | 2.182306145  | Up   | 7.75E-10  | 1.61E-09  | AAEL011782-PA OS=Aedes aegypti GN=AAEL011782 PE=4 SV=1                   |
| CCG013077.1 | 2636 | 20  | 106 | 0.32602227 | 1.405757715 | 2.108305563  | Up   | 3.75E-10  | 7.83E-10  | STIP OS=Aedes aegypti PE=2 SV=1                                          |
| CCG014481.1 | 1929 | 21  | 106 | 0.46778871 | 1.920983586 | 2.037916236  | Up   | 1.93E-10  | 4.08E-10  | Heat shock 70 Ca OS=Aedes aegypti GN=Hsp70Ca PE=3 SV=1                   |
| CCG025256.1 | 1304 | 22  | 106 | 0.72494951 | 2.841700412 | 1.97080204   | Up   | 1.29E-10  | 2.76E-10  | AAEL007464-PA OS=Aedes aegypti GN=AAEL007464 PE=4 SV=1                   |
| CCG008435.1 | 270  | 27  | 106 | 4.29697346 | 13.72436051 | 1.675346156  | Up   | 3.70E-09  | 7.49E-09  | AAEL008777-PA OS=Aedes aegypti GN=AAEL008777 PE=4 SV=1                   |
| CCG025403.1 | 4422 | 184 | 106 | 1.78797629 | 0.837986734 | -1.093328298 | Down | 2.12E-10  | 4.48E-10  | AAEL003498-PA OS=Aedes aegypti GN=AAEL003498 PE=4 SV=1                   |
| CCG027351.1 | 861  | 221 | 106 | 11.0293976 | 4.303806432 | -1.357668901 | Down | 1.33E-16  | 5.02E-16  | AAEL003977-PA OS=Aedes aegypti GN=AAEL003977 PE=4 SV=1                   |
| CCG024891.1 | 1570 | 222 | 106 | 6.07597521 | 2.360240343 | -1.364182208 | Down | 8.81E-17  | 3.32E-16  | -                                                                        |
| CCG011600.1 | 3028 | 228 | 106 | 3.23550181 | 1.223770587 | -1.402656356 | Down | 7.07E-18  | 2.70E-17  | -                                                                        |
| CCG019190.1 | 1353 | 318 | 106 | 10.0993168 | 2.738785911 | -1.882649297 | Down | 1.99E-36  | 8.69E-36  | AAEL003765-PA (Fragment) OS=Aedes aegypti GN=AAEL003765 PE=4 SV=1        |
| CCG008902.1 | 1361 | 385 | 106 | 12.1552886 | 2.722687243 | -2.158480977 | Down | 4.02E-52  | 1.89E-51  | AAEL000820-PA OS=Aedes aegypti GN=AAEL000820 PE=4 SV=1                   |
| CCG019315.1 | 1596 | 514 | 106 | 13.8386238 | 2.321790312 | -2.575390891 | Down | 3.61E-85  | 1.85E-84  | Lysine 6-oxidase OS=Culex quinquefasciatus GN=CpipJ_CPIJ006993 PE=4 SV=1 |
| CCG019482.1 | 4722 | 963 | 106 | 8.76320509 | 0.784747424 | -3.481158329 | Down | 1.11E-214 | 6.68E-214 | AAEL000580-PA OS=Aedes aegypti GN=AAEL000580 PE=4 SV=1                   |
| CCG003726.1 | 1197 | 3   | 107 | 0.10769357 | 3.124925326 | 4.858817689  | Up   | 5.28E-05  | 8.83E-05  | AAEL007809-PA OS=Aedes aegypti GN=AAEL007809 PE=4 SV=1                   |

|             |      |      |     |            |             |              |      |           |           |                                                                                           |
|-------------|------|------|-----|------------|-------------|--------------|------|-----------|-----------|-------------------------------------------------------------------------------------------|
| CCG016389.1 | 1147 | 12   | 107 | 0.44955259 | 3.261147005 | 2.858817689  | Up   | 1.30E-07  | 2.49E-07  | -                                                                                         |
| CCG025540.1 | 522  | 16   | 107 | 1.31707999 | 7.16577704  | 2.44378019   | Up   | 7.09E-09  | 1.42E-08  | Predicted protein OS=Culex quinquefasciatus GN=CpipJ_CPIJ001647 PE=4 SV=1                 |
| CCG001361.1 | 2025 | 36   | 107 | 0.76390639 | 1.847178081 | 1.273855189  | Up   | 1.31E-06  | 2.40E-06  | Putative uncharacterized protein (Fragment) OS=Solenopsis invicta GN=SINV_11683 PE=4 SV=1 |
| CCG013285.1 | 905  | 38   | 107 | 1.80425405 | 4.133188524 | 1.195852677  | Up   | 4.12E-06  | 7.37E-06  | -                                                                                         |
| CCG005435.1 | 470  | 175  | 107 | 15.9993693 | 7.958586414 | -1.007430922 | Down | 6.97E-09  | 1.40E-08  | -                                                                                         |
| CCG010382.1 | 1299 | 177  | 107 | 5.85499848 | 2.879550127 | -1.02382536  | Down | 3.57E-09  | 7.23E-09  | AAEL009835-PA OS=Aedes aegypti GN=AAEL009835 PE=4 SV=1                                    |
| CCG000440.1 | 1524 | 180  | 107 | 5.07516551 | 2.454419695 | -1.048072906 | Down | 1.29E-09  | 2.65E-09  | AAEL002640-PA OS=Aedes aegypti GN=AAEL002640 PE=4 SV=1                                    |
| CCG001900.1 | 1233 | 210  | 107 | 7.31844628 | 3.03368663  | -1.270465327 | Down | 1.93E-14  | 6.78E-14  | AAEL007224-PA OS=Aedes aegypti GN=AAEL007224 PE=4 SV=1                                    |
| CCG020590.1 | 4202 | 276  | 107 | 2.82238143 | 0.890179823 | -1.664744267 | Down | 4.94E-27  | 2.04E-26  | 5-hydroxytryptamine 7 receptor OS=Aedes aegypti PE=2 SV=1                                 |
| CCG028521.2 | 429  | 303  | 107 | 30.3492531 | 8.719197237 | -1.799393793 | Down | 8.92E-33  | 3.81E-32  | AAEL014082-PA OS=Aedes aegypti GN=AAEL014082 PE=4 SV=1                                    |
| CCG010038.1 | 1569 | 323  | 107 | 8.84590458 | 2.384025248 | -1.891610164 | Down | 3.32E-37  | 1.46E-36  | AAEL001737-PA (Fragment) OS=Aedes aegypti GN=AAEL001737 PE=4 SV=1                         |
| CCG003730.1 | 1698 | 355  | 107 | 8.98366065 | 2.202906722 | -2.027895024 | Down | 1.47E-44  | 6.68E-44  | AAEL012509-PA (Fragment) OS=Aedes aegypti GN=AAEL012509 PE=4 SV=1                         |
| CCG017847.1 | 884  | 374  | 107 | 18.1795031 | 4.23137513  | -2.10311427  | Down | 4.59E-49  | 2.13E-48  | AAEL011439-PA OS=Aedes aegypti GN=AAEL011439 PE=4 SV=1                                    |
| CCG003107.1 | 1443 | 416  | 107 | 12.3876712 | 2.592193773 | -2.256659528 | Down | 2.44E-59  | 1.17E-58  | AAEL002127-PA OS=Aedes aegypti GN=AAEL002127 PE=4 SV=1                                    |
| CCG016269.1 | 2037 | 1221 | 107 | 25.7565272 | 1.836296325 | -3.810067295 | Down | 2.90E-293 | 1.82E-292 | AAEL007126-PA OS=Aedes aegypti GN=AAEL007126 PE=4 SV=1                                    |
| CCG014506.1 | 561  | 0    | 108 | 0.001      | 6.729935635 | 12.71637699  | Up   | 4.44E-16  | 1.64E-15  | AAEL007209-PA OS=Aedes aegypti GN=AAEL007209 PE=3 SV=1                                    |

|             |      |     |     |            |             |              |      |          |            |                                                                                                                                                            |
|-------------|------|-----|-----|------------|-------------|--------------|------|----------|------------|------------------------------------------------------------------------------------------------------------------------------------------------------------|
| CCG001064.1 | 822  | 1   | 108 | 0.05227462 | 4.593058262 | 6.457200706  | Up   | 0.000587 | 0.00091854 | Uncharacterized protein<br>OS=Tetrapisispora phaffii (strain<br>ATCC 24235 / CBS 4417 / NBRC<br>1672 / NRRL Y-8282 / UCD 70-5)<br>GN=TPHA0B00750 PE=4 SV=1 |
| CCG007760.1 | 1269 | 7   | 108 | 0.23702769 | 2.975172491 | 3.649845784  | Up   | 4.31E-06 | 7.70E-06   | AAEL010770-FA OS=Aedes<br>aegypti GN=AAEL010770 PE=4<br>SV=1                                                                                               |
| CCG014282.1 | 483  | 16  | 108 | 1.42342806 | 7.816757539 | 2.457200706  | Up   | 7.09E-09 | 1.42E-08   | -                                                                                                                                                          |
| CCG006574.1 | 1335 | 21  | 108 | 0.67592841 | 2.828085312 | 2.064883283  | Up   | 1.83E-10 | 3.87E-10   | AAEL005730-FA OS=Aedes<br>aegypti GN=AAEL005730 PE=4<br>SV=1                                                                                               |
| CCG028603.1 | 1524 | 22  | 108 | 0.62029801 | 2.477358196 | 1.997769087  | Up   | 1.04E-10 | 2.22E-10   | AAEL001982-FA OS=Aedes<br>aegypti GN=AAEL001982 PE=4<br>SV=1                                                                                               |
| CCG004183.1 | 747  | 23  | 108 | 1.32303065 | 5.05420869  | 1.93363875   | Up   | 9.22E-11 | 1.97E-10   | Putative uncharacterized protein<br>OS=Culex quinquefasciatus<br>GN=CpipJ_CPIJ001628 PE=4<br>SV=1                                                          |
| CCG001920.1 | 1198 | 23  | 108 | 0.82496152 | 3.151497405 | 1.93363875   | Up   | 9.22E-11 | 1.97E-10   | AAEL001545-FA OS=Aedes<br>aegypti GN=AAEL001545 PE=4<br>SV=1                                                                                               |
| CCG007108.1 | 1691 | 26  | 108 | 0.6606819  | 2.23269893  | 1.756760988  | Up   | 7.63E-10 | 1.58E-09   | AAEL005202-FA OS=Aedes<br>aegypti GN=AAEL005202 PE=4<br>SV=1                                                                                               |
| CCG006612.1 | 1126 | 28  | 108 | 1.06851916 | 3.353014113 | 1.649845784  | Up   | 3.88E-09 | 7.85E-09   | AAEL005403-FA OS=Aedes<br>aegypti GN=AAEL005403 PE=4<br>SV=1                                                                                               |
| CCG006191.1 | 1838 | 32  | 108 | 0.7481129  | 2.054131606 | 1.457200706  | Up   | 7.35E-08 | 1.42E-07   | -                                                                                                                                                          |
| CCG023031.1 | 543  | 32  | 108 | 2.53228639 | 6.953027424 | 1.457200706  | Up   | 7.35E-08 | 1.42E-07   | AAEL003709-FA OS=Aedes<br>aegypti GN=AAEL003709 PE=4<br>SV=1                                                                                               |
| CCG012544.1 | 255  | 35  | 108 | 5.89780671 | 14.8058584  | 1.327917689  | Up   | 5.20E-07 | 9.71E-07   | AAEL002812-FA OS=Aedes<br>aegypti GN=AAEL002812 PE=4<br>SV=1                                                                                               |
| CCG011980.1 | 1590 | 39  | 108 | 1.05397462 | 2.37452446  | 1.171798487  | Up   | 5.28E-06 | 9.38E-06   | AAEL004630-FA OS=Aedes<br>aegypti GN=AAEL004630 PE=4<br>SV=1                                                                                               |
| CCG026948.1 | 723  | 41  | 108 | 2.4367346  | 5.221983252 | 1.099648701  | Up   | 1.50E-05 | 2.61E-05   | AAEL001155-FA OS=Aedes<br>aegypti GN=AAEL001155 PE=4<br>SV=1                                                                                               |
| CCG028538.7 | 1551 | 184 | 108 | 5.09763454 | 2.434232038 | -1.06636125  | Down | 4.85E-10 | 1.01E-09   | AAEL005762-FA OS=Aedes<br>aegypti GN=AAEL005762 PE=4<br>SV=1                                                                                               |
| CCG006688.1 | 3324 | 197 | 108 | 2.54664191 | 1.135828487 | -1.164851113 | Down | 4.53E-12 | 1.04E-11   | AAEL006394-FA OS=Aedes<br>aegypti GN=AAEL006394 PE=4<br>SV=1                                                                                               |

|             |      |      |     |            |             |              |      |           |           |                                                              |
|-------------|------|------|-----|------------|-------------|--------------|------|-----------|-----------|--------------------------------------------------------------|
| CCG002113.1 | 1726 | 204  | 108 | 5.07869401 | 2.187424039 | -1.215224636 | Down | 3.24E-13  | 8.86E-13  | AAEL005921-PA OS=Aedes<br>aegypti GN=AAEL005921 PE=4<br>SV_1 |
| CCG008467.1 | 2766 | 216  | 108 | 3.35555411 | 1.364965254 | -1.297686796 | Down | 2.92E-15  | 1.06E-14  | AAEL002141-PA OS=Aedes<br>aegypti GN=AAEL002141 PE=4<br>SV_1 |
| CCG017367.1 | 957  | 262  | 108 | 11.763919  | 3.945134683 | -1.576222296 | Down | 6.77E-24  | 2.72E-23  | AAEL007997-PA OS=Aedes<br>aegypti GN=AAEL007997 PE=4<br>SV_1 |
| CCG025839.1 | 717  | 357  | 108 | 21.3949725 | 5.265681857 | -2.022579558 | Down | 1.19E-44  | 5.41E-44  | AAEL014204-PA OS=Aedes<br>aegypti GN=AAEL014204 PE=4<br>SV_1 |
| CCG004657.1 | 1376 | 453  | 108 | 14.1462862 | 2.743818235 | -2.366166534 | Down | 3.05E-68  | 1.50E-67  | AAEL003183-PA OS=Aedes<br>aegypti GN=AAEL003183 PE=3<br>SV_1 |
| CCG026898.1 | 2046 | 493  | 108 | 10.3538999 | 1.845304932 | -2.48824313  | Down | 1.30E-78  | 6.59E-78  | AAEL001457-PA OS=Aedes<br>aegypti GN=AAEL001457 PE=3<br>SV_1 |
| CCG009041.1 | 952  | 1131 | 108 | 51.049128  | 3.965854928 | -3.686182508 | Down | 1.58E-264 | 9.80E-264 | AAEL002889-PA OS=Aedes<br>aegypti GN=AAEL002889 PE=4<br>SV_1 |
| CCG019749.1 | 1128 | 1390 | 108 | 52.9502935 | 3.347069053 | -3.983668462 | Down | 0         | 0         | AAEL014045-PA OS=Aedes<br>aegypti GN=AAEL014045 PE=4<br>SV_1 |
| CCG011404.1 | 1164 | 1921 | 108 | 70.9148283 | 3.243551453 | -4.450441098 | Down | 0         | 0         | AAEL015119-PA OS=Aedes<br>aegypti GN=AAEL015119 PE=4<br>SV_1 |
| CCG003581.1 | 1773 | 0    | 109 | 0.001      | 2.149155199 | 11.06955395  | Up   | 4.44E-16  | 1.65E-15  | -                                                            |
| CCG014188.1 | 330  | 12   | 109 | 1.5625358  | 11.54682475 | 2.885535028  | Up   | 1.30E-07  | 2.49E-07  | AAEL014451-PA OS=Aedes<br>aegypti GN=AAEL014451 PE=4<br>SV_1 |
| CCG004092.1 | 609  | 13   | 109 | 0.91725213 | 6.256900112 | 2.77005781   | Up   | 6.34E-08  | 1.23E-07  | AAEL004317-PA OS=Aedes<br>aegypti GN=AAEL004317 PE=4<br>SV_1 |
| CCG015750.1 | 1014 | 13   | 109 | 0.55089403 | 3.757842375 | 2.77005781   | Up   | 6.34E-08  | 1.23E-07  | AAEL013683-PA OS=Aedes<br>aegypti GN=AAEL013683 PE=4<br>SV_1 |
| CCG021033.1 | 475  | 16   | 109 | 1.44740159 | 8.022004565 | 2.470497529  | Up   | 7.09E-09  | 1.42E-08  | -                                                            |
| CCG011645.1 | 594  | 18   | 109 | 1.30211317 | 6.41490264  | 2.300572527  | Up   | 1.62E-09  | 3.32E-09  | AAEL004854-PA OS=Aedes<br>aegypti GN=AAEL004854 PE=4<br>SV_1 |
| CCG000939.1 | 1084 | 22   | 109 | 0.87207948 | 3.515177277 | 2.01106591   | Up   | 9.70E-11  | 2.07E-10  | AAEL008576-PA OS=Aedes<br>aegypti GN=AAEL008576 PE=4<br>SV_1 |
| CCG019555.1 | 4513 | 189  | 109 | 1.79953021 | 0.844327979 | -1.091744896 | Down | 1.27E-10  | 2.71E-10  | AAEL005920-PA OS=Aedes<br>aegypti GN=AAEL005920 PE=4<br>SV_1 |
| CCG021276.1 | 702  | 195  | 109 | 11.9360374 | 5.427994542 | -1.136832785 | Down | 1.47E-11  | 3.26E-11  | AAEL010661-PA OS=Aedes<br>aegypti GN=AAEL010661 PE=4<br>SV_1 |

|             |      |     |     |            |             |              |      |           |           |                                                                   |
|-------------|------|-----|-----|------------|-------------|--------------|------|-----------|-----------|-------------------------------------------------------------------|
| CCG018801.1 | 1299 | 259 | 109 | 8.56748365 | 2.933373494 | -1.546310759 | Down | 5.02E-23  | 2.01E-22  | AGAP002971-PA OS=Anopheles gambiae GN=AGAP002971 PE=2 SV=3        |
| CCG000081.1 | 897  | 371 | 109 | 17.7723206 | 4.247995728 | -2.064777848 | Down | 1.44E-47  | 6.63E-47  | AAEL001799-PA OS=Aedes aegypti GN=AAEL001799 PE=4 SV=1            |
| CCG002546.1 | 1143 | 403 | 109 | 15.1503089 | 3.333728931 | -2.1841385   | Down | 2.78E-55  | 1.32E-54  | AAEL000791-PA OS=Aedes aegypti GN=AAEL006791 PE=4 SV=1            |
| CCG023578.1 | 1203 | 551 | 109 | 19.6810671 | 3.167458161 | -2.63541098  | Down | 1.47E-93  | 7.66E-93  | AAEL005781-PA OS=Aedes aegypti GN=AAEL005781 PE=4 SV=1            |
| CCG022774.1 | 1140 | 905 | 109 | 34.1119384 | 3.342501902 | -3.351276453 | Down | 4.78E-195 | 2.85E-194 | AAEL013461-PA OS=Aedes aegypti GN=AAEL013461 PE=4 SV=1            |
| CCG005216.1 | 1317 | 3   | 110 | 0.09788094 | 2.919825699 | 4.898710417  | Up   | 5.28E-05  | 8.85E-05  | AGAP000437-PA OS=Anopheles gambiae GN=AgaP_AGAP000437 PE=4 SV=5   |
| CCG005923.1 | 900  | 7   | 110 | 0.33420905 | 4.272678272 | 3.676317995  | Up   | 4.31E-06  | 7.69E-06  | AAEL004050-PA OS=Aedes aegypti GN=AAEL004050 PE=4 SV=1            |
| CCG018122.1 | 477  | 8   | 110 | 0.72066641 | 8.061657117 | 3.483672917  | Up   | 2.19E-06  | 3.96E-06  | AAEL004515-PA OS=Aedes aegypti GN=AAEL004515 PE=4 SV=1            |
| CCG023588.1 | 1500 | 12  | 110 | 0.34375788 | 2.563606963 | 2.898710417  | Up   | 1.30E-07  | 2.49E-07  | AAEL002671-PA OS=Aedes aegypti GN=AAEL002671 PE=4 SV=1            |
| CCG025805.1 | 374  | 17  | 110 | 1.95316976 | 10.28184611 | 2.396210076  | Up   | 3.39E-09  | 6.88E-09  | Mod(Mdg4)-v12 OS=Anopheles gambiae GN=mod(mdg4) PE=4 SV=1         |
| CCG002468.1 | 735  | 20  | 110 | 1.16924448 | 5.231850946 | 2.161744822  | Up   | 3.70E-10  | 7.72E-10  | AAEL008761-PA OS=Aedes aegypti GN=AAEL008761 PE=4 SV=1            |
| CCG013717.1 | 1377 | 44  | 110 | 1.37303437 | 2.792600178 | 1.024241299  | Up   | 3.72E-05  | 6.29E-05  | AAEL014550-PA (Fragment) OS=Aedes aegypti GN=AAEL014550 PE=3 SV=1 |
| CCG005383.1 | 1130 | 44  | 110 | 1.67315781 | 3.403018093 | 1.024241299  | Up   | 3.72E-05  | 6.29E-05  | -                                                                 |
| CCG007747.1 | 1203 | 230 | 110 | 8.21532748 | 3.196517411 | -1.361817134 | Down | 2.74E-17  | 1.04E-16  | AAEL000044-PA OS=Aedes aegypti GN=CYP325Q1 PE=3 SV=1              |
| CCG013773.1 | 1451 | 325 | 110 | 9.62450982 | 2.650179493 | -1.860622991 | Down | 1.27E-36  | 5.55E-36  | AAEL011086-PA OS=Aedes aegypti GN=AAEL011086 PE=4 SV=2            |
| CCG024616.1 | 1050 | 374 | 110 | 15.3054102 | 3.662295662 | -2.063221543 | Down | 6.79E-48  | 3.14E-47  | AAEL009937-PA OS=Aedes aegypti GN=AAEL009937 PE=4 SV=1            |

|             |      |     |     |            |             |              |      |           |            |                                                                                                 |
|-------------|------|-----|-----|------------|-------------|--------------|------|-----------|------------|-------------------------------------------------------------------------------------------------|
| CCG008842.1 | 3861 | 438 | 110 | 4.87457751 | 0.995962301 | -2.291114142 | Down | 1.53E-63  | 7.45E-63   | AAEL004824-PA (Fragment)<br>OS=Aedes aegypti<br>GN=AAEL004824 PE=4 SV=1                         |
| CCG024108.1 | 474  | 604 | 110 | 54.7546829 | 8.112680264 | -2.754731822 | Down | 1.72E-107 | 9.19E-107  | AAEL004120-PA OS=Aedes<br>aegypti GN=AAEL004120 PE=4<br>SV=1                                    |
| CCG008923.1 | 450  | 5   | 111 | 0.4774415  | 8.623041604 | 4.174800975  | Up   | 1.59E-05  | 2.76E-05   | AAEL000583-PA OS=Aedes<br>aegypti GN=AAEL000583 PE=3<br>SV=1                                    |
| CCG015606.1 | 558  | 14  | 111 | 1.0780937  | 6.95406581  | 2.689374148  | Up   | 3.07E-08  | 6.01E-08   | AGAP007888-PA OS=Anopheles<br>gambiae GN=AGAP007888 PE=4<br>SV=4                                |
| CCG026760.2 | 801  | 16  | 111 | 0.85832179 | 4.844405395 | 2.49672907   | Up   | 7.09E-09  | 1.42E-08   | AAEL011985-PA OS=Aedes<br>aegypti GN=AAEL011985 PE=4<br>SV=1                                    |
| CCG011274.1 | 730  | 21  | 111 | 1.23611565 | 5.315573591 | 2.104411647  | Up   | 1.78E-10  | 3.76E-10   | -                                                                                               |
| CCG003251.1 | 1329 | 30  | 111 | 0.96997144 | 2.91976578  | 1.589838475  | Up   | 6.03E-09  | 1.21E-08   | AAEL006438-PA OS=Aedes<br>aegypti GN=AAEL006438 PE=4<br>SV=1                                    |
| CCG000068.1 | 1260 | 42  | 111 | 1.43232449 | 3.079657716 | 1.104411647  | Up   | 1.06E-05  | 1.86E-05   | AAEL015181-PA OS=Aedes<br>aegypti GN=AAEL015181 PE=4<br>SV=1                                    |
| CCG007001.1 | 1527 | 188 | 111 | 5.29031441 | 2.541171396 | -1.057859782 | Down | 4.10E-10  | 8.55E-10   | AAEL003966-PA OS=Aedes<br>aegypti GN=AAEL003966 PE=4<br>SV=1                                    |
| CCG014555.1 | 2922 | 203 | 111 | 2.98523481 | 1.32798382  | -1.168606847 | Down | 1.89E-12  | 4.52E-12   | AAEL006199-PA OS=Aedes<br>aegypti GN=AAEL006199 PE=4<br>SV=1                                    |
| CCG001840.1 | 1074 | 231 | 111 | 9.24209376 | 3.613006259 | -1.355019971 | Down | 3.09E-17  | 1.17E-16   | AAEL008164-PA OS=Aedes<br>aegypti GN=AAEL008164 PE=4<br>SV=1                                    |
| CCG022565.1 | 483  | 297 | 111 | 26.4223834 | 8.033889693 | -1.717590051 | Down | 3.21E-30  | 1.35E-29   | AAEL000316-PA OS=Aedes<br>aegypti GN=AAEL000316 PE=4<br>SV=1                                    |
| CCG003565.1 | 861  | 389 | 111 | 19.4137361 | 4.506816169 | -2.106897275 | Down | 4.43E-51  | 2.08E-50   | AAEL001301-PA OS=Aedes<br>aegypti GN=AAEL001301 PE=4<br>SV=1                                    |
| CCG019102.1 | 2451 | 767 | 111 | 13.4466693 | 1.583177773 | -3.086353697 | Down | 4.67E-153 | 2.66E-152  | Microtubule-associated protein<br>OS=Culex quinquefasciatus<br>GN=CpipJ_CPIJ013260 PE=4<br>SV=1 |
| CCG015978.1 | 705  | 2   | 112 | 0.12189996 | 5.553655317 | 5.509668126  | Up   | 9.36E-05  | 0.00015369 | AAEL003906-PA OS=Aedes<br>aegypti GN=AAEL003906 PE=4<br>SV=1                                    |
| CCG023600.1 | 714  | 6   | 112 | 0.36109021 | 5.483651258 | 3.924705625  | Up   | 8.38E-06  | 1.47E-05   | -                                                                                               |
| CCG007485.1 | 2278 | 8   | 112 | 0.15090337 | 1.718756365 | 3.509668126  | Up   | 2.19E-06  | 3.96E-06   | AAEL011567-PA OS=Aedes<br>aegypti GN=AAEL011567 PE=3<br>SV=1                                    |

|             |       |      |     |            |             |              |      |           |           |                                                                                          |
|-------------|-------|------|-----|------------|-------------|--------------|------|-----------|-----------|------------------------------------------------------------------------------------------|
| CCG009569.1 | 996   | 19   | 112 | 0.81970377 | 3.931051203 | 2.261740612  | Up   | 7.73E-10  | 1.60E-09  | AAEL007611-PA OS=Reedes aegypti GN=AAEL007611 PE=4 SV=1                                  |
| CCG025031.1 | 1599  | 22   | 112 | 0.59120335 | 2.448609755 | 2.050236507  | Up   | 8.76E-11  | 1.87E-10  | AAEL003366-PA OS=Reedes aegypti GN=AAEL003366 PE=4 SV=1                                  |
| CCG026571.1 | 639   | 27   | 112 | 1.81562259 | 6.127272298 | 1.754780624  | Up   | 3.80E-10  | 7.93E-10  | AAEL013522-PA OS=Reedes aegypti GN=AAEL013522 PE=4 SV=1                                  |
| CCG018408.1 | 984   | 28   | 112 | 1.22271603 | 3.978990852 | 1.702313204  | Up   | 8.67E-10  | 1.79E-09  | AAEL004507-PA OS=Reedes aegypti GN=AAEL004507 PE=4 SV=1                                  |
| CCG027442.1 | 1668  | 28   | 112 | 0.72131449 | 2.347318344 | 1.702313204  | Up   | 8.67E-10  | 1.79E-09  | AAEL008626-PA OS=Reedes aegypti GN=AAEL008626 PE=4 SV=1                                  |
| CCG025790.1 | 1054  | 39   | 112 | 1.58996172 | 3.714731498 | 1.224265907  | Up   | 1.58E-06  | 2.89E-06  | -                                                                                        |
| CCG026593.1 | 2223  | 44   | 112 | 0.85050307 | 1.761280701 | 1.050236507  | Up   | 2.16E-05  | 3.71E-05  | Putative uncharacterized protein OS=Culex quinquefasciatus GN=CpipJ_CPIJ009352 PE=4 SV=1 |
| CCG027822.1 | 900   | 399  | 112 | 19.0499157 | 4.350363332 | -2.13057681  | Down | 4.36E-53  | 2.06E-52  | AAEL008106-PA OS=Reedes aegypti GN=AAEL008106 PE=4 SV=1                                  |
| CCG006063.1 | 357   | 451  | 112 | 54.2838944 | 10.96730252 | -2.307315497 | Down | 6.20E-66  | 3.04E-65  | AAEL005948-PA OS=Reedes aegypti GN=AAEL005948 PE=4 SV=1                                  |
| CCG009207.1 | 2309  | 1041 | 112 | 19.3726694 | 1.695680814 | -3.514086227 | Down | 7.46E-234 | 4.55E-233 | AAEL002555-PA OS=Reedes aegypti GN=AAEL002555 PE=3 SV=1                                  |
| CCG008377.1 | 13638 | 1701 | 112 | 5.35940157 | 0.287089529 | -4.2224993   | Down | 0         | 0         | AAEL003155-PA OS=Reedes aegypti GN=AAEL003155 PE=4 SV=1                                  |
| CCG015526.1 | 1983  | 0    | 113 | 0.001      | 1.992075277 | 10.96005645  | Up   | 4.44E-16  | 1.64E-15  | AGAP003785-PB OS=Anopheles gambiae GN=AgaP_AGAP003785 PE=3 SV=1                          |
| CCG005833.1 | 1200  | 3    | 113 | 0.10742434 | 3.291904396 | 4.937529666  | Up   | 5.28E-05  | 8.84E-05  | -                                                                                        |
| CCG012237.1 | 1042  | 4    | 113 | 0.164951   | 3.791060725 | 4.522492166  | Up   | 2.95E-05  | 5.03E-05  | AAEL013813-PA OS=Reedes aegypti GN=AAEL013813 PE=4 SV=1                                  |
| CCG025994.1 | 828   | 23   | 113 | 1.19360374 | 4.770875936 | 1.99893021   | Up   | 4.67E-11  | 1.01E-10  | AAEL005268-PA OS=Reedes aegypti GN=AAEL005268 PE=4 SV=1                                  |
| CCG007030.1 | 885   | 25   | 113 | 1.21383431 | 4.463599181 | 1.878635976  | Up   | 5.34E-11  | 1.15E-10  | AAEL004183-PA OS=Reedes aegypti GN=AAEL004183 PE=4 SV=1                                  |
| CCG010099.1 | 683   | 29   | 113 | 1.82448361 | 5.783726611 | 1.664511171  | Up   | 1.33E-09  | 2.74E-09  | AAEL009735-PA OS=Reedes aegypti GN=AAEL009735 PE=4 SV=1                                  |

|             |      |     |     |            |             |              |      |           |            |                                                                                                 |
|-------------|------|-----|-----|------------|-------------|--------------|------|-----------|------------|-------------------------------------------------------------------------------------------------|
| CCG022398.1 | 840  | 35  | 113 | 1.79040561 | 4.702720566 | 1.393209149  | Up   | 1.01E-07  | 1.93E-07   | Transcriptional activator HATZ<br>OS=Culex quinquefasciatus<br>GN=CpipJ_CPIJ017497 PE=4<br>SV=1 |
| CCG017176.1 | 585  | 35  | 113 | 2.57083882 | 6.752624402 | 1.393209149  | Up   | 1.01E-07  | 1.93E-07   | AAEL011303-PA OS=Aedes<br>aegypti GN=AAEL011303 PE=3<br>SV=1                                    |
| CCG017622.1 | 1157 | 38  | 113 | 1.4112791  | 3.414248293 | 1.274564653  | Up   | 6.50E-07  | 1.20E-06   | AAEL000170-PA OS=Aedes<br>aegypti GN=AAEL000170 PE=4<br>SV=1                                    |
| CCG014213.1 | 710  | 45  | 113 | 2.72343388 | 5.563782078 | 1.03063907   | Up   | 2.65E-05  | 4.53E-05   | AAEL003463-PA OS=Aedes<br>aegypti GN=AAEL003463 PE=4<br>SV=1                                    |
| CCG002925.1 | 1779 | 198 | 113 | 4.78246625 | 2.220508867 | -1.106864454 | Down | 2.80E-11  | 6.11E-11   | AAEL000575-PA OS=Aedes<br>aegypti GN=AAEL000575 PE=3<br>SV=1                                    |
| CCG015247.1 | 2271 | 261 | 113 | 4.9383975  | 1.739447501 | -1.50541383  | Down | 2.40E-22  | 9.53E-22   | AAEL002684-PA OS=Aedes<br>aegypti GN=AAEL002684 PE=4<br>SV=1                                    |
| CCG001545.1 | 1948 | 271 | 113 | 5.97782242 | 2.027867184 | -1.559656875 | Down | 2.63E-24  | 1.06E-23   | -                                                                                               |
| CCG000557.1 | 1719 | 528 | 113 | 13.1983827 | 2.29801354  | -2.521901953 | Down | 2.23E-85  | 1.15E-84   | AAEL013371-PA OS=Aedes<br>aegypti GN=AAEL013371 PE=4<br>SV=1                                    |
| CCG025274.1 | 2338 | 786 | 113 | 14.4457705 | 1.689600203 | -3.095893336 | Down | 2.78E-157 | 1.59E-156  | AAEL013884-PA OS=Aedes<br>aegypti GN=AAEL013884 PE=4<br>SV=1                                    |
| CCG008526.1 | 483  | 1   | 114 | 0.08896425 | 8.251021847 | 6.535203218  | Up   | 0.000587  | 0.00091621 | Uncharacterized protein<br>OS=Anopheles darlingi<br>GN=AND_17523 PE=4 SV=1                      |
| CCG006107.1 | 643  | 1   | 114 | 0.06682696 | 6.197890439 | 6.535203218  | Up   | 0.000587  | 0.00091711 | -                                                                                               |
| CCG021862.1 | 1212 | 3   | 114 | 0.10636073 | 3.288154746 | 4.950240717  | Up   | 5.28E-05  | 8.85E-05   | AAEL005945-PA (Fragment)<br>OS=Aedes aegypti<br>GN=GPRDOP4 PE=3 SV=2                            |
| CCG027300.1 | 855  | 3   | 114 | 0.150771   | 4.66110357  | 4.950240717  | Up   | 5.28E-05  | 8.85E-05   | AAEL004145-PA OS=Aedes<br>aegypti GN=AAEL004145 PE=4<br>SV=1                                    |
| CCG005681.1 | 363  | 6   | 114 | 0.71024355 | 10.97863237 | 3.950240717  | Up   | 8.38E-06  | 1.48E-05   | AAEL001341-PA OS=Aedes<br>aegypti GN=AAEL001341 PE=4<br>SV=1                                    |
| CCG026051.1 | 456  | 9   | 114 | 0.84808687 | 8.739569193 | 3.365278217  | Up   | 1.09E-06  | 2.01E-06   | -                                                                                               |
| CCG001290.1 | 477  | 12  | 114 | 1.08099961 | 8.354808285 | 2.950240717  | Up   | 1.30E-07  | 2.49E-07   | AAEL014061-PA (Fragment)<br>OS=Aedes aegypti<br>GN=AAEL014061 PE=4 SV=1                         |
| CCG018260.1 | 660  | 21  | 114 | 1.36721883 | 6.038247806 | 2.142885795  | Up   | 1.76E-10  | 3.73E-10   | AAEL009202-PA OS=Aedes<br>aegypti GN=AAEL009202 PE=4<br>SV=1                                    |



|             |      |      |     |            |             |              |      |           |            |                                                                                                                |
|-------------|------|------|-----|------------|-------------|--------------|------|-----------|------------|----------------------------------------------------------------------------------------------------------------|
| CCG024529.1 | 1925 | 21   | 114 | 0.46876074 | 2.070256391 | 2.142885795  | Up   | 1.76E-10  | 3.73E-10   | Eukaryotic translation initiation factor 4e type OS=Culex quinquefasciatus<br>GN=CpipJ_CPIJ012021 PE=2<br>SV=2 |
| CCG019843.1 | 1740 | 22   | 114 | 0.5432955  | 2.290369857 | 2.075771599  | Up   | 8.54E-11  | 1.83E-10   | AGAP009563-PA (Fragment)<br>OS=Anopheles gambiae<br>GN=AGAP009563 PE=4 SV=3                                    |
| CCG022236.1 | 942  | 34   | 114 | 1.5509246  | 4.230619482 | 1.447740377  | Up   | 3.69E-08  | 7.20E-08   | AAEL013581-PA OS=Aedes aegypti GN=AAEL013581 PE=4<br>SV=1                                                      |
| CCG016756.1 | 1865 | 190  | 114 | 4.37761371 | 2.136859813 | -1.03465239  | Down | 6.84E-10  | 1.42E-09   | AAEL010478-PA OS=Aedes aegypti GN=AAEL010478 PE=3<br>SV=1                                                      |
| CCG028109.1 | 2085 | 258  | 114 | 5.31711824 | 1.911387795 | -1.476024037 | Down | 1.65E-21  | 6.50E-21   | AAEL003115-PA OS=Aedes aegypti GN=AAEL003115 PE=4<br>SV=1                                                      |
| CCG017815.1 | 1080 | 371  | 114 | 14.7608996 | 3.690040326 | -2.000072159 | Down | 1.12E-45  | 5.12E-45   | Putative uncharacterized protein<br>OS=Culex quinquefasciatus<br>GN=CpipJ_CPIJ017097 PE=4<br>SV=1              |
| CCG021742.1 | 894  | 414  | 114 | 19.8987362 | 4.457766837 | -2.15828374  | Down | 6.51E-56  | 3.10E-55   | AAEL008108-PA OS=Aedes aegypti GN=AAEL008108 PE=4<br>SV=1                                                      |
| CCG001012.1 | 1741 | 519  | 114 | 12.8094729 | 2.289054309 | -2.48438751  | Down | 1.62E-82  | 8.27E-82   | AAEL001241-PA OS=Aedes aegypti GN=AAEL001241 PE=4<br>SV=1                                                      |
| CCG001893.1 | 1416 | 624  | 114 | 18.9358153 | 2.814437537 | -2.750199001 | Down | 8.57E-111 | 4.61E-110  | AAEL011177-PA OS=Aedes aegypti GN=AAEL011177 PE=4<br>SV=1                                                      |
| CCG003439.1 | 1416 | 882  | 114 | 26.7650466 | 2.814437537 | -3.249431628 | Down | 9.84E-185 | 5.79E-184  | AAEL011177-PA OS=Aedes aegypti GN=AAEL011177 PE=4<br>SV=1                                                      |
| CCG028190.2 | 471  | 1155 | 114 | 105.371642 | 8.461238964 | -3.638473918 | Down | 3.70E-267 | 2.30E-266  | AAEL008289-PA OS=Aedes aegypti GN=AAEL008289 PE=4<br>SV=1                                                      |
| CCG019655.1 | 1536 | 2    | 115 | 0.05595018 | 2.617318899 | 5.547803255  | Up   | 9.36E-05  | 0.00015359 | AAEL002743-PA OS=Aedes aegypti GN=AAEL002743 PE=4<br>SV=1                                                      |
| CCG028515.2 | 462  | 7    | 115 | 0.65105659 | 8.70173556  | 3.740448333  | Up   | 4.31E-06  | 7.71E-06   | -                                                                                                              |
| CCG001402.1 | 981  | 8    | 115 | 0.35041578 | 4.098065065 | 3.547803255  | Up   | 2.19E-06  | 3.97E-06   | AAEL003007-PA OS=Aedes aegypti GN=AAEL003007 PE=4<br>SV=1                                                      |
| CCG011498.1 | 708  | 10   | 115 | 0.60691716 | 5.678251171 | 3.22587516   | Up   | 5.43E-07  | 1.01E-06   | Pipsqueak OS=Culex quinquefasciatus<br>GN=CpipJ_CPIJ013751 PE=4<br>SV=1                                        |
| CCG010987.1 | 1224 | 11   | 115 | 0.38616592 | 3.284478618 | 3.088371636  | Up   | 2.67E-07  | 5.03E-07   | -                                                                                                              |

|             |      |      |     |            |             |              |      |          |          |                                                                                       |
|-------------|------|------|-----|------------|-------------|--------------|------|----------|----------|---------------------------------------------------------------------------------------|
| CCG014107.1 | 2661 | 12   | 115 | 0.19377558 | 1.510786106 | 2.962840754  | Up   | 1.30E-07 | 2.49E-07 | AAEL014653-PA OS=Aedes aegypti GN=AAEL014653 PE=4 SV=2                                |
| CCG018162.1 | 1356 | 13   | 115 | 0.41195173 | 2.964750611 | 2.847363537  | Up   | 6.34E-08 | 1.23E-07 | AAEL001732-PA OS=Aedes aegypti GN=AAEL001732 PE=4 SV=1                                |
| CCG000937.1 | 276  | 17   | 115 | 2.64668655 | 14.56594866 | 2.460340414  | Up   | 3.39E-09 | 6.89E-09 | AAEL0008578-PA OS=Aedes aegypti GN=AAEL008578 PE=4 SV=1                               |
| CCG018854.1 | 828  | 22   | 115 | 1.14170792 | 4.855316218 | 2.088371636  | Up   | 8.49E-11 | 1.82E-10 | AAEL000487-PA OS=Aedes aegypti GN=AAEL000487 PE=4 SV=1                                |
| CCG022953.1 | 2004 | 36   | 115 | 0.7719114  | 2.006088737 | 1.377878253  | Up   | 9.91E-08 | 1.90E-07 | AAEL004950-PA OS=Aedes aegypti GN=AAEL004950 PE=4 SV=1                                |
| CCG027039.1 | 633  | 44   | 115 | 2.98683779 | 6.351029745 | 1.088371636  | Up   | 9.37E-06 | 1.64E-05 | AAEL0006340-PA OS=Aedes aegypti GN=AAEL006340 PE=4 SV=1                               |
| CCG022137.1 | 816  | 235  | 115 | 12.3748623 | 4.926717927 | -1.328713692 | Down | 4.96E-17 | 1.88E-16 | AGAP001434-PA OS=Anopheles gambiae GN=AGAP001434 PE=3 SV=3                            |
| CCG019018.1 | 1581 | 235  | 115 | 6.3870257  | 2.542822156 | -1.328713692 | Down | 4.96E-17 | 1.88E-16 | AAEL013602-PA (Fragment) OS=Aedes aegypti GN=AAEL013602 PE=4 SV=1                     |
| CCG027114.1 | 4964 | 338  | 115 | 2.92581996 | 0.80987144  | -1.853076182 | Down | 8.08E-38 | 3.56E-37 | Putative uncharacterized protein OS=Tribolium castaneum GN=TcasGA2_TC010720 PE=4 SV=1 |
| CCG020414.1 | 1578 | 500  | 115 | 13.6152518 | 2.547656419 | -2.41798103  | Down | 4.34E-77 | 2.19E-76 | AAEL0006846-PA OS=Aedes aegypti GN=AAEL006846 PE=4 SV=1                               |
| CCG016989.1 | 816  | 544  | 115 | 28.6464897 | 4.926717927 | -2.539659586 | Down | 1.28E-88 | 6.64E-88 | Uncharacterized protein OS=Anopheles darlingi GN=AND_10976 PE=4 SV=1                  |
| CCG012984.1 | 933  | 3866 | 115 | 178.050369 | 4.308897994 | -5.368822667 | Down | 0        | 0        | AAEL013766-PA OS=Aedes aegypti GN=AAEL013766 PE=4 SV=1                                |
| CCG018515.1 | 849  | 6    | 116 | 0.30367304 | 4.776395884 | 3.975331698  | Up   | 8.38E-06 | 1.47E-05 | AAEL004333-PA OS=Aedes aegypti GN=AAEL004333 PE=4 SV=1                                |
| CCG013884.1 | 1091 | 13   | 116 | 0.51201334 | 3.716920353 | 2.859854481  | Up   | 6.34E-08 | 1.23E-07 | AAEL002098-PA (Fragment) OS=Aedes aegypti GN=AAEL002098 PE=4 SV=1                     |

|             |      |      |     |            |             |              |      |          |          |                                                                   |
|-------------|------|------|-----|------------|-------------|--------------|------|----------|----------|-------------------------------------------------------------------|
| CCG023702.1 | 1497 | 18   | 116 | 0.51667016 | 2.708857786 | 2.390369198  | Up   | 1.62E-09 | 3.32E-09 | AAEL015342-PA OS=Aedes aegypti GN=AAEL015342 PE=4 SV=1            |
| CCG024657.1 | 1155 | 24   | 116 | 0.8928776  | 3.51096113  | 1.975331698  | Up   | 2.44E-11 | 5.32E-11 | AAEL012784-PA OS=Aedes aegypti GN=AAEL012784 PE=4 SV=1            |
| CCG018075.1 | 1194 | 27   | 116 | 0.97167742 | 3.396281495 | 1.805406697  | Up   | 8.21E-11 | 1.76E-10 | AAEL002541-PA OS=Aedes aegypti GN=AAEL002541 PE=4 SV=1            |
| CCG005239.1 | 657  | 33   | 116 | 2.15829717 | 6.172237604 | 1.51590008   | Up   | 9.17E-09 | 1.83E-08 | AAEL011755-PA OS=Aedes aegypti GN=AAEL011755 PE=3 SV=1            |
| CCG017330.1 | 1284 | 215  | 116 | 7.19508796 | 3.158224381 | -1.187898651 | Down | 2.08E-13 | 5.97E-13 | AAEL003606-PA OS=Aedes aegypti GN=AAEL003606 PE=4 SV=1            |
| CCG002876.1 | 1419 | 223  | 116 | 6.75281946 | 2.85775906  | -1.240605701 | Down | 9.77E-15 | 3.49E-14 | AAEL015239-PA (Fragment) OS=Aedes aegypti GN=AAEL015239 PE=4 SV=1 |
| CCG027210.1 | 858  | 256  | 116 | 12.8208066 | 4.726293829 | -1.439705801 | Down | 1.26E-20 | 4.96E-20 | -                                                                 |
| CCG009424.1 | 720  | 270  | 116 | 16.1136505 | 5.632166813 | -1.516521398 | Down | 2.67E-23 | 1.07E-22 | AAEL008136-PA OS=Aedes aegypti GN=AAEL008136 PE=4 SV=1            |
| CCG021109.1 | 543  | 287  | 116 | 22.7114435 | 7.468066493 | -1.604612728 | Down | 1.13E-26 | 4.67E-26 | AAEL013327-PA OS=Aedes aegypti GN=AAEL013327 PE=4 SV=1            |
| CCG026084.1 | 2442 | 288  | 116 | 5.06768369 | 1.660589724 | -1.609630802 | Down | 7.11E-27 | 2.94E-26 | AAEL004047-PA (Fragment) OS=Aedes aegypti GN=AAEL004047 PE=4 SV=1 |
| CCG022848.1 | 960  | 300  | 116 | 13.4280421 | 4.22412511  | -1.668524492 | Down | 2.47E-29 | 1.04E-28 | AAEL005485-PA OS=Aedes aegypti GN=AAEL005485 PE=4 SV=1            |
| CCG017359.1 | 2385 | 365  | 116 | 6.57608098 | 1.700276774 | -1.951458455 | Down | 1.46E-43 | 6.63E-43 | AAEL007186-PA OS=Aedes aegypti GN=AAEL007186 PE=4 SV=2            |
| CCG024024.1 | 1914 | 2979 | 116 | 66.8792264 | 2.118683441 | -4.980318209 | Down | 0        | 0        | -                                                                 |
| CCG006350.1 | 528  | 7    | 117 | 0.56967451 | 7.74643633  | 3.765323001  | Up   | 4.31E-06 | 7.69E-06 | AAEL002875-PA OS=Aedes aegypti GN=AAEL002875 PE=4 SV=1            |
| CCG021510.1 | 807  | 9    | 117 | 0.47921637 | 5.06830035  | 3.402752922  | Up   | 1.09E-06 | 2.01E-06 | AAEL001326-PA OS=Aedes aegypti GN=AAEL001326 PE=4 SV=1            |
| CCG015752.1 | 525  | 12   | 117 | 0.98216536 | 7.790701681 | 2.987715423  | Up   | 1.30E-07 | 2.49E-07 | AAEL013681-PA OS=Aedes aegypti GN=AAEL013681 PE=4 SV=1            |
| CCG024664.1 | 1620 | 13   | 117 | 0.34481886 | 2.524764434 | 2.872238205  | Up   | 6.34E-08 | 1.23E-07 | AAEL004399-PA (Fragment) OS=Aedes aegypti GN=GPRFSH PE=3 SV=2     |

|             |      |     |     |            |             |              |      |          |          |                                                                   |
|-------------|------|-----|-----|------------|-------------|--------------|------|----------|----------|-------------------------------------------------------------------|
| CCG007365.1 | 1182 | 14  | 117 | 0.50894779 | 3.460337041 | 2.765323001  | Up   | 3.07E-08 | 6.01E-08 | AAEL007981-PA OS=Aedes aegypti GN=AAEL007981 PE=4 SV=1            |
| CCG013632.1 | 925  | 17  | 117 | 0.78971404 | 4.421749603 | 2.485215082  | Up   | 3.39E-09 | 6.88E-09 | AAEL004924-PA OS=Aedes aegypti GN=AAEL004924 PE=4 SV=1            |
| CCG021240.1 | 1164 | 26  | 117 | 0.95980507 | 3.513847408 | 1.872238205  | Up   | 2.67E-11 | 5.81E-11 | AAEL005701-PA OS=Aedes aegypti GN=AAEL005701 PE=4 SV=1            |
| CCG021837.1 | 1104 | 28  | 117 | 1.08981211 | 3.704817375 | 1.765323001  | Up   | 1.29E-10 | 2.75E-10 | AAEL006132-PA OS=Aedes aegypti GN=AAEL006132 PE=4 SV=1            |
| CCG027040.1 | 1673 | 29  | 117 | 0.74484298 | 2.444780862 | 1.714696928  | Up   | 2.96E-10 | 6.21E-10 | AAEL006356-PA OS=Aedes aegypti GN=AAEL006356 PE=4 SV=1            |
| CCG003995.1 | 408  | 33  | 117 | 3.47549324 | 10.02479996 | 1.528283804  | Up   | 6.44E-09 | 1.29E-08 | AAEL005390-PA (Fragment) OS=Aedes aegypti GN=AAEL005390 PE=4 SV=1 |
| CCG006345.1 | 2175 | 220 | 117 | 4.34636396 | 1.880514199 | -1.20868179  | Down | 4.98E-14 | 1.68E-13 | AAEL002294-PA (Fragment) OS=Aedes aegypti GN=AAEL002294 PE=4 SV=1 |
| CCG011830.1 | 1544 | 299 | 117 | 8.32121156 | 2.649040403 | -1.651323751 | Down | 7.84E-29 | 3.29E-28 | AAEL010478-PA OS=Aedes aegypti GN=AAEL010478 PE=3 SV=1            |
| CCG017007.1 | 894  | 340 | 117 | 16.3419572 | 4.57507649  | -1.836713013 | Down | 1.37E-37 | 6.04E-37 | AAEL008899-PA OS=Aedes aegypti GN=AAEL008899 PE=3 SV=1            |
| CCG013875.1 | 1396 | 399 | 117 | 12.2814643 | 2.929884228 | -2.067567013 | Down | 4.05E-51 | 1.90E-50 | AAEL010864-PA OS=Aedes aegypti GN=AAEL010864 PE=4 SV=1            |
| CCG021129.1 | 873  | 436 | 117 | 21.4602569 | 4.685129877 | -2.195506401 | Down | 4.73E-60 | 2.28E-59 | AAEL002018-PA OS=Aedes aegypti GN=AAEL002018 PE=4 SV=1            |
| CCG020220.1 | 1818 | 521 | 117 | 12.3142089 | 2.249790089 | -2.452461639 | Down | 1.36E-81 | 6.92E-81 | AAEL001374-PA OS=Aedes aegypti GN=AAEL001374 PE=4 SV=1            |
| CCG012225.1 | 519  | 576 | 117 | 47.688954  | 7.880767596 | -2.597247078 | Down | 3.85E-96 | 2.03E-95 | AAEL009300-PA OS=Aedes aegypti GN=AAEL009300 PE=4 SV=1            |
| CCG015062.1 | 1281 | 5   | 118 | 0.16771949 | 3.220200358 | 4.263028158  | Up   | 1.59E-05 | 2.76E-05 | AAEL008050-PA OS=Aedes aegypti GN=AAEL008050 PE=4 SV=1            |
| CCG024668.1 | 530  | 5   | 118 | 0.40537485 | 7.783163508 | 4.263028158  | Up   | 1.59E-05 | 2.76E-05 | -                                                                 |
| CCG019007.1 | 1269 | 8   | 118 | 0.27088879 | 3.250651426 | 3.584956253  | Up   | 2.19E-06 | 3.96E-06 | AAEL010089-PA OS=Aedes aegypti GN=AAEL010089 PE=4 SV=1            |
| CCG019416.1 | 1019 | 10  | 118 | 0.42168532 | 4.048161589 | 3.263028158  | Up   | 5.43E-07 | 1.01E-06 | AAEL012839-PA OS=Aedes aegypti GN=AAEL012839 PE=4 SV=1            |

|             |      |     |     |            |             |              |      |          |          |                                                                      |
|-------------|------|-----|-----|------------|-------------|--------------|------|----------|----------|----------------------------------------------------------------------|
| CCG015435.1 | 1164 | 11  | 118 | 0.40607138 | 3.543880291 | 3.125524635  | Up   | 2.67E-07 | 5.03E-07 | AAEL007757-PA OS=Aedes aegypti GN=AAEL007757 PE=4 SV=1               |
| CCG023722.1 | 1056 | 13  | 118 | 0.52898348 | 3.906322594 | 2.884516535  | Up   | 6.34E-08 | 1.23E-07 | AAEL002641-PA OS=Aedes aegypti GN=AAEL002641 PE=4 SV=1               |
| CCG014046.1 | 606  | 14  | 118 | 0.99270014 | 6.807057193 | 2.777601331  | Up   | 3.07E-08 | 6.01E-08 | -                                                                    |
| CCG004662.1 | 1329 | 19  | 118 | 0.61431524 | 3.103895154 | 2.33702874   | Up   | 7.73E-10 | 1.60E-09 | AAEL009129-PA OS=Aedes aegypti GN=CYP6Z9 PE=3 SV=1                   |
| CCG000501.1 | 420  | 24  | 118 | 2.45541341 | 9.821611093 | 1.999993752  | Up   | 2.15E-11 | 4.70E-11 | Insulin-like peptide 2 OS=Aedes aegypti PE=2 SV=2                    |
| CCG015017.1 | 781  | 24  | 118 | 1.32045279 | 5.281788296 | 1.999993752  | Up   | 2.15E-11 | 4.70E-11 | AAEL010667-PA OS=Aedes aegypti GN=AAEL010667 PE=3 SV=1               |
| CCG008713.2 | 1062 | 29  | 118 | 1.17337317 | 3.884252975 | 1.726975258  | Up   | 2.02E-10 | 4.28E-10 | AAEL002945-PA OS=Aedes aegypti GN=AAEL002945 PE=4 SV=2               |
| CCG020228.1 | 234  | 29  | 118 | 5.32530899 | 17.62853273 | 1.726975258  | Up   | 2.02E-10 | 4.28E-10 | AAEL000435-PA OS=Aedes aegypti GN=AAEL000435 PE=4 SV=1               |
| CCG015253.1 | 1938 | 30  | 118 | 0.66516617 | 2.128522528 | 1.678065658  | Up   | 4.56E-10 | 9.51E-10 | AAEL000811-PA (Fragment) OS=Aedes aegypti GN=GPRMTH7 PE=4 SV=2       |
| CCG028041.1 | 279  | 33  | 118 | 5.08244173 | 14.785221   | 1.540562134  | Up   | 4.52E-09 | 9.12E-09 | Uncharacterized protein OS=Anopheles darlingi GN=AND_30410 PE=4 SV=1 |
| CCG008666.1 | 1269 | 34  | 118 | 1.15127737 | 3.250651426 | 1.497493412  | Up   | 9.26E-09 | 1.85E-08 | AAEL008491-PA OS=Aedes aegypti GN=AAEL008491 PE=4 SV=1               |
| CCG012183.1 | 1209 | 37  | 118 | 1.31503737 | 3.411974077 | 1.375502888  | Up   | 6.99E-08 | 1.35E-07 | AAEL004635-PA OS=Aedes aegypti GN=AAEL004635 PE=4 SV=1               |
| CCG006872.1 | 1749 | 197 | 118 | 4.83993008 | 2.358534396 | -1.037095566 | Down | 3.08E-10 | 6.47E-10 | AAEL013727-PA OS=Aedes aegypti GN=AAEL013727 PE=4 SV=1               |
| CCG027953.2 | 1263 | 264 | 118 | 8.98179726 | 3.26609395  | -1.459437866 | Down | 1.25E-21 | 4.94E-21 | AAEL004502-PA OS=Aedes aegypti GN=AAEL004502 PE=4 SV=1               |
| CCG009530.1 | 3171 | 324 | 118 | 4.3904743  | 1.300875641 | -1.75489375  | Down | 8.77E-34 | 3.77E-33 | AAEL006482-PA OS=Aedes aegypti GN=AAEL006482 PE=4 SV=1               |
| CCG017268.1 | 1539 | 405 | 118 | 11.3078249 | 2.680361702 | -2.076821845 | Down | 3.72E-52 | 1.75E-51 | AAEL005169-PA OS=Aedes aegypti GN=AAEL005169 PE=3 SV=1               |

|             |      |      |     |            |             |              |      |           |            |                                                                                           |
|-------------|------|------|-----|------------|-------------|--------------|------|-----------|------------|-------------------------------------------------------------------------------------------|
| CCG016446.1 | 4833 | 479  | 118 | 4.25874258 | 0.853523    | -2.318925593 | Down | 2.42E-70  | 1.20E-69   | Cadherin OS=Culex quinquefasciatus GN=CpipJ_CPIJ008474 PE=4 SV=1                          |
| CCG023061.1 | 406  | 543  | 118 | 57.4693741 | 10.16028734 | -2.499852135 | Down | 7.17E-87  | 3.70E-86   | AAEL003854-PA OS=Aedes aegypti GN=AAEL003854 PE=4 SV=1                                    |
| CCG005407.1 | 519  | 632  | 118 | 52.3253801 | 7.948124584 | -2.718824495 | Down | 8.46E-111 | 4.55E-110  | AAEL001429-PA OS=Aedes aegypti GN=AAEL001429 PE=4 SV=1                                    |
| CCG021686.1 | 2790 | 1362 | 118 | 20.9766231 | 1.4785221   | -3.826554735 | Down | 0         | 0          | AAEL002506-PA OS=Aedes aegypti GN=AAEL002506 PE=4 SV=1                                    |
| CCG000646.1 | 870  | 1    | 119 | 0.0493905  | 4.781649352 | 6.597130967  | Up   | 0.000587  | 0.00091626 | Putative secreted protein OS=Aedes aegypti PE=2 SV=1                                      |
| CCG017324.1 | 634  | 4    | 119 | 0.27110243 | 6.5615693   | 4.597130967  | Up   | 2.95E-05  | 5.03E-05   | -                                                                                         |
| CCG017853.1 | 429  | 5    | 119 | 0.50081276 | 9.697051133 | 4.275202872  | Up   | 1.59E-05  | 2.76E-05   | AAEL004909-PA OS=Aedes aegypti GN=AAEL004909 PE=4 SV=1                                    |
| CCG011970.1 | 909  | 6    | 119 | 0.28362861 | 4.576496079 | 4.012168466  | Up   | 8.38E-06  | 1.48E-05   | Putative uncharacterized protein OS=Culex quinquefasciatus GN=CpipJ_CPIJ000030 PE=4 SV=1  |
| CCG005039.1 | 357  | 11   | 119 | 1.32399742 | 11.65275892 | 3.137699348  | Up   | 2.67E-07  | 5.04E-07   | -                                                                                         |
| CCG025696.1 | 471  | 11   | 119 | 1.00353945 | 8.832345936 | 3.137699348  | Up   | 2.67E-07  | 5.03E-07   | AAEL006313-PA OS=Aedes aegypti GN=AAEL006313 PE=4 SV=1                                    |
| CCG024632.1 | 790  | 12   | 119 | 0.65270483 | 5.265867007 | 3.012168466  | Up   | 1.30E-07  | 2.49E-07   | Putative uncharacterized protein (Fragment) OS=Solenopsis invicta GN=SINV_11683 PE=4 SV=1 |
| CCG003362.1 | 842  | 16   | 119 | 0.81652702 | 4.940659069 | 2.597130967  | Up   | 7.09E-09  | 1.42E-08   | AAEL007171-PA OS=Aedes aegypti GN=AAEL007171 PE=3 SV=1                                    |
| CCG025750.1 | 267  | 17   | 119 | 2.73590071 | 15.58065519 | 2.509668126  | Up   | 3.39E-09  | 6.89E-09   | Uncharacterized protein OS=Anopheles darlingi GN=AND_13112 PE=4 SV=1                      |
| CCG007528.1 | 900  | 20   | 119 | 0.95488299 | 4.62226104  | 2.275202872  | Up   | 3.69E-10  | 7.70E-10   | AAEL011172-PA OS=Aedes aegypti GN=AAEL011172 PE=4 SV=1                                    |
| CCG007083.1 | 717  | 21   | 119 | 1.25852779 | 5.802001305 | 2.204813544  | Up   | 1.76E-10  | 3.72E-10   | Putative uncharacterized protein OS=Culex quinquefasciatus GN=CpipJ_CPIJ016896 PE=4 SV=1  |
| CCG017913.1 | 1458 | 31   | 119 | 0.91362262 | 2.853247555 | 1.642934657  | Up   | 6.94E-10  | 1.44E-09   | AAEL010868-PA OS=Aedes aegypti GN=AAEL010868 PE=3 SV=1                                    |

|             |      |     |     |            |             |              |      |           |           |                                                                                          |
|-------------|------|-----|-----|------------|-------------|--------------|------|-----------|-----------|------------------------------------------------------------------------------------------|
| CCG015401.1 | 543  | 39  | 119 | 3.08622403 | 7.661206143 | 1.311728748  | Up   | 1.77E-07  | 3.35E-07  | AAEL004301-PA OS=Aedes aegypti GN=AAEL004301 PE=2 SV=1                                   |
| CCG018396.1 | 1282 | 42  | 119 | 1.40774482 | 3.244957048 | 1.204813544  | Up   | 1.02E-06  | 1.87E-06  | AAEL001811-PA OS=Aedes aegypti GN=AAEL001811 PE=4 SV=1                                   |
| CCG012175.1 | 1321 | 45  | 119 | 1.4637684  | 3.149155894 | 1.105277871  | Up   | 5.00E-06  | 8.89E-06  | Mueller or mag4 OS=Culex quinquefasciatus GN=CpipJ_CPIJ001651 PE=4 SV=1                  |
| CCG018346.1 | 933  | 199 | 119 | 9.1650345  | 4.458772707 | -1.039493653 | Down | 2.32E-10  | 4.89E-10  | Putative uncharacterized protein OS=Culex quinquefasciatus GN=CpipJ_CPIJ006398 PE=3 SV=1 |
| CCG011374.1 | 4983 | 546 | 119 | 4.70830325 | 0.834845462 | -2.495626174 | Down | 3.60E-87  | 1.86E-86  | AAEL006004-PA OS=Aedes aegypti GN=AAEL006004 PE=4 SV=1                                   |
| CCG027919.1 | 4169 | 662 | 119 | 6.82321044 | 0.997849589 | -2.77355644  | Down | 1.65E-118 | 9.02E-118 | AAEL004488-PA OS=Aedes aegypti GN=AAEL004488 PE=3 SV=1                                   |
| CCG014881.1 | 273  | 715 | 119 | 112.539781 | 15.23822321 | -2.884668465 | Down | 2.66E-133 | 1.48E-132 | Putative antennal carrier protein AP-2 OS=Anopheles gambiae PE=4 SV=1                    |
| CCG025609.1 | 782  | 771 | 119 | 42.365301  | 5.31973777  | -2.993456083 | Down | 3.40E-149 | 1.93E-148 | AAEL000297-PA OS=Aedes aegypti GN=AAEL000297 PE=4 SV=1                                   |
| CCG014303.1 | 708  | 0   | 120 | 0.001      | 5.925131656 | 12.5326315   | Up   | 4.44E-16  | 1.63E-15  | -                                                                                        |
| CCG020081.1 | 1698 | 4   | 120 | 0.10122435 | 2.470549595 | 4.609203799  | Up   | 2.95E-05  | 5.02E-05  | -                                                                                        |
| CCG022080.1 | 589  | 8   | 120 | 0.58362967 | 7.122229563 | 3.609203799  | Up   | 2.19E-06  | 3.97E-06  | AAEL000550-PA OS=Aedes aegypti GN=AAEL000550 PE=4 SV=1                                   |
| CCG002337.1 | 867  | 11  | 120 | 0.54517541 | 4.838515816 | 3.149772181  | Up   | 2.67E-07  | 5.04E-07  | AAEL006009-PA OS=Aedes aegypti GN=AAEL006009 PE=4 SV=1                                   |
| CCG005879.1 | 1107 | 13  | 120 | 0.50461296 | 3.789515097 | 2.908764081  | Up   | 6.34E-08  | 1.23E-07  | AAEL002330-PA OS=Aedes aegypti GN=AAEL002330 PE=4 SV=1                                   |
| CCG018217.1 | 330  | 21  | 120 | 2.73443766 | 12.71210064 | 2.216886377  | Up   | 1.76E-10  | 3.72E-10  | AAEL001177-PA OS=Aedes aegypti GN=AAEL001177 PE=4 SV=1                                   |
| CCG026304.1 | 309  | 22  | 120 | 3.05933386 | 13.57602981 | 2.149772181  | Up   | 8.39E-11  | 1.80E-10  | AAEL003171-PA OS=Aedes aegypti GN=AAEL003171 PE=4 SV=1                                   |
| CCG008564.1 | 793  | 26  | 120 | 1.40884376 | 5.290029272 | 1.908764081  | Up   | 1.12E-11  | 2.49E-11  | -                                                                                        |
| CCG023091.1 | 691  | 26  | 120 | 1.61680622 | 6.0709019   | 1.908764081  | Up   | 1.12E-11  | 2.49E-11  | AAEL001358-PA OS=Aedes aegypti GN=AAEL001358 PE=4 SV=1                                   |

|             |      |     |     |            |             |              |      |           |           |                                                                                                   |
|-------------|------|-----|-----|------------|-------------|--------------|------|-----------|-----------|---------------------------------------------------------------------------------------------------|
| CCG024073.1 | 1427 | 30  | 120 | 0.90335812 | 2.939728951 | 1.702313204  | Up   | 2.15E-10  | 4.54E-10  | Flap endonuclease 1<br>OS=Anopheles darlingi GN=Fen1<br>PE=3 SV=1                                 |
| CCG023881.1 | 2276 | 243 | 120 | 4.58771771 | 1.843142888 | -1.315608704 | Down | 2.59E-17  | 9.81E-17  | AAEL001794-PB (Fragment)<br>OS=Aedes aegypti<br>GN=AAEL001794 PE=4 SV=1                           |
| CCG012662.1 | 1300 | 328 | 120 | 10.8415946 | 3.226917856 | -1.748348205 | Down | 5.22E-34  | 2.25E-33  | AAEL000049-PA OS=Aedes<br>aegypti GN=AAEL000049 PE=4<br>SV=1                                      |
| CCG015146.1 | 2415 | 343 | 120 | 6.10294781 | 1.737057231 | -1.812860967 | Down | 2.97E-37  | 1.30E-36  | AAEL000309-PA OS=Aedes<br>aegypti GN=AAEL003099 PE=3<br>SV=1                                      |
| CCG017240.1 | 924  | 362 | 120 | 16.8344631 | 4.540035944 | -1.890642088 | Down | 1.81E-41  | 8.13E-41  | AAEL001209-PA OS=Aedes<br>aegypti GN=AAEL001209 PE=4<br>SV=1                                      |
| CCG018156.1 | 2973 | 382 | 120 | 5.52117007 | 1.411030344 | -1.968225029 | Down | 5.10E-46  | 2.34E-45  | AAEL000304-PA OS=Aedes<br>aegypti GN=AAEL003043 PE=4<br>SV=1                                      |
| CCG022219.1 | 1089 | 533 | 120 | 21.0311006 | 3.85215171  | -2.448787923 | Down | 2.75E-83  | 1.41E-82  | AAEL011623-PA OS=Aedes<br>aegypti GN=AAEL011623 PE=4<br>SV=1                                      |
| CCG022147.1 | 930  | 656 | 120 | 30.3098343 | 4.51074539  | -2.748348205 | Down | 2.69E-116 | 1.46E-115 | AAEL000315-PA OS=Aedes<br>aegypti GN=AAEL003154 PE=4<br>SV=1                                      |
| CCG027249.1 | 664  | 712 | 120 | 46.0759805 | 6.317760862 | -2.866529632 | Down | 7.12E-132 | 3.96E-131 | AAEL000447-PA OS=Aedes<br>aegypti GN=AAEL004470 PE=4<br>SV=1                                      |
| CCG006103.1 | 552  | 5   | 121 | 0.38921861 | 7.662955597 | 4.299248346  | Up   | 1.59E-05  | 2.76E-05  | -                                                                                                 |
| CCG026932.1 | 596  | 10  | 121 | 0.7209687  | 7.097234043 | 3.299248346  | Up   | 5.43E-07  | 1.01E-06  | -                                                                                                 |
| CCG025164.1 | 528  | 11  | 121 | 0.8952028  | 8.01127176  | 3.161744822  | Up   | 2.67E-07  | 5.03E-07  | Putative uncharacterized protein<br>OS=Culex quinquefasciatus<br>GN=CpipJ_CPIJ003878 PE=4<br>SV=1 |
| CCG017217.3 | 2459 | 18  | 121 | 0.31454055 | 1.72019174  | 2.45125144   | Up   | 1.62E-09  | 3.32E-09  | Putative uncharacterized protein<br>OS=Culex quinquefasciatus<br>GN=CpipJ_CPIJ007691 PE=3<br>SV=1 |
| CCG022156.1 | 1584 | 26  | 121 | 0.7053113  | 2.67042392  | 1.920736723  | Up   | 9.00E-12  | 2.01E-11  | AAEL013549-PA OS=Aedes<br>aegypti GN=AAEL013549 PE=4<br>SV=1                                      |
| CCG013799.1 | 383  | 29  | 121 | 3.25358304 | 11.04425976 | 1.763195446  | Up   | 6.44E-11  | 1.39E-10  | AAEL000317-PA OS=Aedes<br>aegypti GN=AAEL003176 PE=4<br>SV=1                                      |
| CCG024536.1 | 774  | 35  | 121 | 1.94307585 | 5.465053604 | 1.491893424  | Up   | 6.58E-09  | 1.32E-08  | AAEL000549-PA OS=Aedes<br>aegypti GN=AAEL005499 PE=3<br>SV=1                                      |



|             |      |      |     |            |             |              |      |           |           |                                                                                          |
|-------------|------|------|-----|------------|-------------|--------------|------|-----------|-----------|------------------------------------------------------------------------------------------|
| CCG022720.1 | 508  | 36   | 121 | 3.0450993  | 8.32667616  | 1.45125144   | Up   | 1.32E-08  | 2.61E-08  | AAEL014169-PA OS=Aedes aegypti GN=AAEL014169 PE=4 SV=1                                   |
| CCG025036.1 | 675  | 40   | 121 | 2.54635464 | 6.266594799 | 1.299248346  | Up   | 1.71E-07  | 3.25E-07  | Putative uncharacterized protein OS=Culex quinquefasciatus GN=CpipJ_CPIJ003437 PE=4 SV=1 |
| CCG023530.2 | 2063 | 227  | 121 | 4.72812882 | 2.050388507 | -1.205372046 | Down | 2.26E-14  | 7.92E-14  | AAEL001646-PA OS=Aedes aegypti GN=AAEL001646 PE=3 SV=1                                   |
| CCG021349.1 | 1443 | 322  | 121 | 9.58853399 | 2.931359314 | -1.709740437 | Down | 2.00E-32  | 8.55E-32  | AAEL003387-PA (Fragment) OS=Aedes aegypti GN=AAEL003387 PE=4 SV=1                        |
| CCG025670.1 | 1437 | 661  | 121 | 19.7654799 | 2.94359881  | -2.74733002  | Down | 4.01E-117 | 2.19E-116 | AAEL000993-PA OS=Aedes aegypti GN=AAEL000993 PE=3 SV=1                                   |
| CCG024163.1 | 696  | 702  | 121 | 43.3401634 | 6.077516508 | -2.834150779 | Down | 1.70E-128 | 9.42E-128 | AAEL006777-PA OS=Aedes aegypti GN=AAEL006777 PE=4 SV=1                                   |
| CCG019834.1 | 2637 | 996  | 121 | 16.2297519 | 1.604077167 | -3.338825491 | Down | 9.79E-214 | 5.89E-213 | AAEL010028-PA OS=Aedes aegypti GN=AAEL010028 PE=3 SV=1                                   |
| CCG023921.1 | 798  | 1512 | 121 | 81.4163393 | 5.30069109  | -3.941065983 | Down | 0         | 0         | AAEL012639-PA OS=Aedes aegypti GN=AAEL012639 PE=4 SV=1                                   |
| CCG005992.1 | 636  | 0    | 122 | 0.001      | 6.705832966 | 12.71120083  | Up   | 4.44E-16  | 1.65E-15  | -                                                                                        |
| CCG021205.1 | 735  | 5    | 122 | 0.29231112 | 5.802598321 | 4.311122446  | Up   | 1.59E-05  | 2.76E-05  | -                                                                                        |
| CCG009690.1 | 960  | 9    | 122 | 0.40284126 | 4.44261434  | 3.46312554   | Up   | 1.09E-06  | 2.01E-06  | AAEL014658-PA OS=Aedes aegypti GN=AAEL014658 PE=3 SV=1                                   |
| CCG018153.1 | 952  | 10   | 122 | 0.45136276 | 4.479947233 | 3.311122446  | Up   | 5.43E-07  | 1.01E-06  | AAEL008095-PA OS=Aedes aegypti GN=AAEL008095 PE=4 SV=1                                   |
| CCG004171.1 | 699  | 13   | 122 | 0.799151   | 6.101444587 | 2.932610823  | Up   | 6.34E-08  | 1.23E-07  | AAEL007932-PA OS=Aedes aegypti GN=AAEL007932 PE=4 SV=1                                   |
| CCG009802.1 | 636  | 13   | 122 | 0.87831219 | 6.705832966 | 2.932610823  | Up   | 6.34E-08  | 1.23E-07  | AGAP005722-PA OS=Anopheles gambiae GN=AGAP005722 PE=4 SV=1                               |
| CCG019881.1 | 1941 | 20   | 122 | 0.44275873 | 2.19727448  | 2.311122446  | Up   | 3.69E-10  | 7.70E-10  | SuHAKinin receptor OS=Culex quinquefasciatus GN=CpipJ_CPIJ005574 PE=3 SV=1               |
| CCG003208.1 | 1265 | 24   | 122 | 0.81523607 | 3.371470171 | 2.048088041  | Up   | 1.97E-11  | 4.32E-11  | AAEL001631-PA OS=Aedes aegypti GN=AAEL001631 PE=4 SV=1                                   |
| CCG022528.1 | 934  | 34   | 122 | 1.56420875 | 4.566284546 | 1.5455877    | Up   | 2.26E-09  | 4.62E-09  | -                                                                                        |

|             |      |     |     |            |             |              |      |           |           |                                                                                    |
|-------------|------|-----|-----|------------|-------------|--------------|------|-----------|-----------|------------------------------------------------------------------------------------|
| CCG010301.1 | 1068 | 35  | 122 | 1.40818419 | 3.993361204 | 1.503767524  | Up   | 4.64E-09  | 9.37E-09  | AAEL012506-PA OS=Aedes aegypti GN=AAEL012506 PE=4 SV=1                             |
| CCG002388.1 | 1848 | 35  | 122 | 0.81382073 | 2.307851605 | 1.503767524  | Up   | 4.64E-09  | 9.37E-09  | AAEL012037-PA OS=Aedes aegypti GN=AAEL012037 PE=4 SV=1                             |
| CCG008452.2 | 1293 | 39  | 122 | 1.29607088 | 3.298460763 | 1.347648323  | Up   | 6.71E-08  | 1.29E-07  | AAEL011622-PA OS=Aedes aegypti GN=AAEL011622 PE=4 SV=1                             |
| CCG013890.1 | 1374 | 45  | 122 | 1.40730572 | 3.104010019 | 1.141197445  | Up   | 2.11E-06  | 3.84E-06  | 3-oxoacyl-[acyl-carrier-protein] synthase OS=Aedes aegypti GN=AAEL002113 PE=3 SV=1 |
| CCG026367.1 | 1128 | 200 | 122 | 7.61874727 | 3.780948374 | -1.010805648 | Down | 5.33E-10  | 1.11E-09  | AAEL014422-PA OS=Aedes aegypti GN=AAEL014422 PE=4 SV=1                             |
| CCG004240.1 | 1709 | 325 | 122 | 8.17154111 | 2.49555867  | -1.711245367 | Down | 9.46E-33  | 4.04E-32  | AAEL000989-PA OS=Aedes aegypti GN=CYP6AG7 PE=3 SV=1                                |
| CCG019263.1 | 1788 | 353 | 122 | 8.48339839 | 2.38529629  | -1.830473832 | Down | 8.68E-39  | 3.85E-38  | AAEL007793-PA OS=Aedes aegypti GN=AAEL007793 PE=4 SV=1                             |
| CCG003128.1 | 1485 | 671 | 122 | 19.4159542 | 2.871993109 | -2.757118415 | Down | 2.51E-119 | 1.37E-118 | AAEL007090-PA OS=Aedes aegypti GN=AAEL007090 PE=4 SV=1                             |
| CCG016909.1 | 1870 | 752 | 122 | 17.2798077 | 2.28070041  | -2.92153831  | Down | 5.67E-142 | 3.20E-141 | AAEL005112-PA (Fragment) OS=Aedes aegypti GN=AAEL005112 PE=4 SV=2                  |
| CCG026734.1 | 288  | 3   | 123 | 0.4476014  | 14.93009737 | 5.059865208  | Up   | 5.28E-05  | 8.84E-05  | AAEL003843-PA OS=Aedes aegypti GN=AAEL003843 PE=4 SV=1                             |
| CCG016077.1 | 1092 | 5   | 123 | 0.19674787 | 3.937608098 | 4.322899614  | Up   | 1.59E-05  | 2.76E-05  | AAEL000081-PA (Fragment) OS=Aedes aegypti GN=AAEL000081 PE=3 SV=1                  |
| CCG002190.1 | 763  | 13  | 123 | 0.73211868 | 5.63547581  | 2.944387991  | Up   | 6.34E-08  | 1.23E-07  | AAEL012512-PA OS=Aedes aegypti GN=IAP9 PE=4 SV=1                                   |
| CCG017774.1 | 1437 | 14  | 123 | 0.41863346 | 2.992253335 | 2.837472787  | Up   | 3.07E-08  | 6.01E-08  | AAEL012916-PA OS=Aedes aegypti GN=AAEL012916 PE=4 SV=1                             |
| CCG004570.1 | 1185 | 16  | 123 | 0.58018207 | 3.628580627 | 2.644827709  | Up   | 7.09E-09  | 1.42E-08  | AAEL013003-PA OS=Aedes aegypti GN=AAEL013003 PE=4 SV=1                             |
| CCG020613.1 | 716  | 24  | 123 | 1.4403263  | 6.005402295 | 2.059865208  | Up   | 1.96E-11  | 4.29E-11  | -                                                                                  |
| CCG021160.1 | 1398 | 24  | 123 | 0.73767785 | 3.075728214 | 2.059865208  | Up   | 1.96E-11  | 4.28E-11  | AAEL007981-PA OS=Aedes aegypti GN=AAEL007981 PE=4 SV=1                             |

|             |      |      |     |            |             |              |      |           |           |                                                                                           |
|-------------|------|------|-----|------------|-------------|--------------|------|-----------|-----------|-------------------------------------------------------------------------------------------|
| CCG012178.1 | 813  | 37   | 123 | 1.95557218 | 5.288890582 | 1.435374344  | Up   | 1.31E-08  | 2.60E-08  | AAEL010576-PA OS=Aedes aegypti GN=AAEL010576 PE=4 SV=1                                    |
| CCG008663.1 | 1617 | 37   | 123 | 0.98322831 | 2.65916391  | 1.435374344  | Up   | 1.31E-08  | 2.60E-08  | AAEL008472-PA OS=Aedes aegypti GN=AAEL008472 PE=4 SV=1                                    |
| CCG004371.1 | 5003 | 40   | 123 | 0.34355175 | 0.859457934 | 1.322899614  | Up   | 9.04E-08  | 1.74E-07  | -                                                                                         |
| CCG027502.1 | 945  | 43   | 123 | 1.9552366  | 4.550124913 | 1.218562954  | Up   | 5.29E-07  | 9.87E-07  | AAEL010768-PA OS=Aedes aegypti GN=AAEL010768 PE=3 SV=1                                    |
| CCG004878.1 | 1599 | 50   | 123 | 1.34364398 | 2.689098213 | 1.000971519  | Up   | 1.85E-05  | 3.18E-05  | -                                                                                         |
| CCG013953.1 | 1521 | 223  | 123 | 6.29996766 | 2.827000686 | -1.156072191 | Down | 2.52E-13  | 7.07E-13  | AAEL011854-PA OS=Aedes aegypti GN=AAEL011854 PE=4 SV=1                                    |
| CCG013651.1 | 861  | 479  | 123 | 23.905346  | 4.994039539 | -2.259054137 | Down | 3.77E-68  | 1.86E-67  | AAEL003977-PA OS=Aedes aegypti GN=AAEL003977 PE=4 SV=1                                    |
| CCG020078.1 | 2826 | 584  | 123 | 8.87980361 | 1.521538586 | -2.54499685  | Down | 3.13E-95  | 1.64E-94  | Ubiquitin-protein ligase OS=Culex quinquefasciatus GN=CpipJ_CPIJ002472 PE=4 SV=1          |
| CCG014930.1 | 2187 | 683  | 123 | 13.4194462 | 1.966103358 | -2.770914059 | Down | 4.38E-122 | 2.41E-121 | AAEL010917-PA OS=Aedes aegypti GN=AAEL010917 PE=4 SV=1                                    |
| CCG010808.1 | 846  | 1326 | 123 | 67.3497259 | 5.082586339 | -3.728037351 | Down | 0         | 0         | AGAP005471-PA OS=Anopheles gambiae GN=AGAP005471 PE=4 SV=4                                |
| CCG001189.1 | 541  | 5    | 124 | 0.39713248 | 8.012617966 | 4.334581419  | Up   | 1.59E-05  | 2.76E-05  | -                                                                                         |
| CCG024060.1 | 684  | 10   | 124 | 0.62821249 | 6.33746538  | 3.334581419  | Up   | 5.43E-07  | 1.01E-06  | AAEL005704-PA OS=Aedes aegypti GN=AAEL005704 PE=4 SV=1                                    |
| CCG015937.1 | 993  | 11   | 124 | 0.47599907 | 4.365384008 | 3.197077896  | Up   | 2.67E-07  | 5.03E-07  | Putative uncharacterized protein OS=Trichoplax adhaerens GN=TRIADDRAFT_51596 PE=4 SV=1    |
| CCG017954.1 | 1407 | 11   | 124 | 0.33593965 | 3.080900014 | 3.197077896  | Up   | 2.67E-07  | 5.04E-07  | AAEL007461-PA OS=Aedes aegypti GN=AAEL007461 PE=4 SV=1                                    |
| CCG027703.1 | 2750 | 14   | 124 | 0.21875501 | 1.57630048  | 2.849154592  | Up   | 3.07E-08  | 6.02E-08  | Putative uncharacterized protein (Fragment) OS=Solenopsis invicta GN=SINV_11683 PE=4 SV=1 |
| CCG004182.1 | 523  | 18   | 124 | 1.47888188 | 8.288386845 | 2.486584513  | Up   | 1.62E-09  | 3.33E-09  | AAEL000561-PA OS=Aedes aegypti GN=AAEL000561 PE=4 SV=1                                    |

|             |      |     |     |            |             |              |      |           |           |                                                                                          |
|-------------|------|-----|-----|------------|-------------|--------------|------|-----------|-----------|------------------------------------------------------------------------------------------|
| CCG008202.1 | 1390 | 19  | 124 | 0.58735608 | 3.118580086 | 2.408582001  | Up   | 7.73E-10  | 1.60E-09  | AAEL015598-PA OS=Aedes aegypti GN=AAEL015598 PE=4 SV=1                                   |
| CCG010871.1 | 1599 | 20  | 124 | 0.53745759 | 2.7109608   | 2.334581419  | Up   | 3.69E-10  | 7.70E-10  | AAEL002349-PA OS=Aedes aegypti GN=AAEL002349 PE=4 SV=1                                   |
| CCG018145.1 | 458  | 23  | 124 | 2.15786877 | 9.464686288 | 2.132947558  | Up   | 4.01E-11  | 8.67E-11  | Putative uncharacterized protein OS=Culex quinquefasciatus GN=CpipJ_CPIJ011907 PE=4 SV=1 |
| CCG004278.1 | 519  | 39  | 124 | 3.2289396  | 8.352266512 | 1.371107295  | Up   | 3.49E-08  | 6.81E-08  | AAEL014250-PA OS=Aedes aegypti GN=AAEL014250 PE=4 SV=1                                   |
| CCG028548.1 | 1860 | 40  | 124 | 0.92408031 | 2.330551785 | 1.334581419  | Up   | 6.55E-08  | 1.26E-07  | AAEL009176-PA OS=Aedes aegypti GN=GNBPB3 PE=4 SV=1                                       |
| CCG022271.1 | 2136 | 41  | 124 | 0.8247936  | 2.029413071 | 1.29895751   | Up   | 1.21E-07  | 2.31E-07  | AAEL003211-PA OS=Aedes aegypti GN=AAEL003211 PE=4 SV=1                                   |
| CCG028602.1 | 1239 | 42  | 124 | 1.45660117 | 3.498649168 | 1.264192091  | Up   | 2.19E-07  | 4.14E-07  | AAEL001976-PA OS=Aedes aegypti GN=AAEL001976 PE=4 SV=1                                   |
| CCG022676.1 | 3831 | 210 | 124 | 2.3554279  | 1.131513004 | -1.057736003 | Down | 3.96E-11  | 8.58E-11  | Putative uncharacterized protein OS=Culex quinquefasciatus GN=CpipJ_CPIJ013821 PE=4 SV=1 |
| CCG018336.1 | 1698 | 238 | 124 | 6.02284855 | 2.552901248 | -1.238308249 | Down | 1.38E-15  | 5.02E-15  | AAEL003295-PA OS=Aedes aegypti GN=AAEL003295 PE=4 SV=1                                   |
| CCG019410.1 | 1434 | 258 | 124 | 7.73095644 | 3.022891436 | -1.354717741 | Down | 4.57E-19  | 1.77E-18  | -                                                                                        |
| CCG018966.1 | 867  | 340 | 124 | 16.8508763 | 4.999799677 | -1.752881422 | Down | 2.57E-35  | 1.12E-34  | Putative uncharacterized protein OS=Culex quinquefasciatus GN=CpipJ_CPIJ003741 PE=4 SV=1 |
| CCG016638.1 | 747  | 658 | 124 | 37.8501812 | 5.802980348 | -2.70543426  | Down | 1.16E-114 | 6.30E-114 | -                                                                                        |
| CCG027106.1 | 507  | 3   | 125 | 0.25425878 | 8.61890453  | 5.083134988  | Up   | 5.28E-05  | 8.84E-05  | AAEL014453-PA OS=Aedes aegypti GN=AAEL014453 PE=4 SV=1                                   |
| CCG012765.1 | 1070 | 3   | 125 | 0.12047589 | 4.083910838 | 5.083134988  | Up   | 5.28E-05  | 8.84E-05  | -                                                                                        |
| CCG009169.1 | 1788 | 9   | 125 | 0.21629061 | 2.443951117 | 3.498172487  | Up   | 1.09E-06  | 2.01E-06  | AAEL007839-PA OS=Aedes aegypti GN=AAEL007839 PE=4 SV=1                                   |
| CCG005959.1 | 724  | 24  | 125 | 1.42441109 | 6.035614084 | 2.083134988  | Up   | 1.94E-11  | 4.25E-11  | -                                                                                        |
| CCG025693.1 | 2223 | 25  | 125 | 0.48324038 | 1.965715068 | 2.024241299  | Up   | 9.65E-12  | 2.15E-11  | AAEL014407-PA OS=Aedes aegypti GN=AAEL014407 PE=4 SV=1                                   |
| CCG023147.1 | 1257 | 25  | 125 | 0.85460888 | 3.476360061 | 2.024241299  | Up   | 9.65E-12  | 2.15E-11  | FXa-directed anticoagulant OS=Aedes albopictus PE=2 SV=1                                 |

|             |      |      |     |            |             |              |      |           |           |                                                                       |
|-------------|------|------|-----|------------|-------------|--------------|------|-----------|-----------|-----------------------------------------------------------------------|
| CCG027049.1 | 698  | 26   | 125 | 1.60059183 | 6.260436385 | 1.96765777   | Up   | 5.46E-12  | 1.24E-11  | AAEL009170-PA OS=Aedes aegypti GN=AAEL009170 PE=3 SV=1                |
| CCG007007.1 | 885  | 28   | 125 | 1.35949443 | 4.937609714 | 1.860742566  | Up   | 6.71E-12  | 1.51E-11  | AAEL012732-PA OS=Aedes aegypti GN=AAEL012732 PE=4 SV=1                |
| CCG012170.1 | 573  | 28   | 125 | 2.0997427  | 7.626151128 | 1.860742566  | Up   | 6.71E-12  | 1.51E-11  | AAEL010510-PA OS=Aedes aegypti GN=AAEL010510 PE=4 SV=1                |
| CCG027508.1 | 1574 | 38   | 125 | 1.03738876 | 2.776229096 | 1.420169975  | Up   | 1.30E-08  | 2.59E-08  | -                                                                     |
| CCG023984.1 | 1466 | 40   | 125 | 1.17243478 | 2.980753476 | 1.346169394  | Up   | 4.74E-08  | 9.21E-08  | -                                                                     |
| CCG013273.1 | 432  | 46   | 125 | 4.575481   | 10.11524212 | 1.144535532  | Up   | 1.49E-06  | 2.72E-06  | AAEL001777-PA OS=Aedes aegypti GN=AAEL001777 PE=4 SV=1                |
| CCG010628.1 | 2526 | 256  | 125 | 4.35481079 | 1.729922643 | -1.331902512 | Down | 1.77E-18  | 6.78E-18  | AAEL013473-PA OS=Aedes aegypti GN=AAEL013473 PE=3 SV=1                |
| CCG015758.1 | 1850 | 292  | 125 | 6.78225    | 2.362045728 | -1.52172707  | Down | 3.44E-25  | 1.40E-24  | AAEL000904-PA OS=Aedes aegypti GN=CYP6AG5 PE=3 SV=2                   |
| CCG000237.1 | 648  | 361  | 125 | 23.9383861 | 6.743494748 | -1.827757538 | Down | 1.50E-39  | 6.67E-39  | Carsymenini-1 OS=Culex quinquefasciatus GN=CpipJ_CPIJ000075 PE=4 SV=1 |
| CCG023191.1 | 1362 | 403  | 125 | 12.714246  | 3.208358735 | -1.98653854  | Down | 4.86E-49  | 2.26E-48  | SLC4-like anion exchanger OS=Aedes aegypti PE=2 SV=1                  |
| CCG014456.1 | 1329 | 434  | 125 | 14.0322534 | 3.288024527 | -2.093453744 | Down | 2.47E-56  | 1.18E-55  | AAEL009199-PA OS=Aedes aegypti GN=AAEL009199 PE=4 SV=1                |
| CCG016254.1 | 1842 | 764  | 125 | 17.8224089 | 2.372304341 | -2.90933134  | Down | 1.39E-143 | 7.86E-143 | AAEL013372-PA OS=Aedes aegypti GN=AAEL013372 PE=3 SV=1                |
| CCG020907.1 | 786  | 1152 | 125 | 62.9785423 | 5.559522387 | -3.501827513 | Down | 8.57E-258 | 5.29E-257 | AAEL014108-PA OS=Aedes aegypti GN=AAEL014108 PE=4 SV=1                |
| CCG011381.1 | 260  | 8239 | 125 | 1361.64478 | 16.80686383 | -6.340156039 | Down | 0         | 0         | AAEL000000-PA OS=Aedes aegypti GN=AAEL006000 PE=4 SV=1                |
| CCG006380.1 | 933  | 12   | 126 | 0.5526654  | 4.721053455 | 3.094630627  | Up   | 1.30E-07  | 2.49E-07  | AAEL002496-PA OS=Aedes aegypti GN=AAEL002496 PE=4 SV=1                |
| CCG003141.1 | 486  | 12   | 126 | 1.0609811  | 9.063256941 | 3.094630627  | Up   | 1.30E-07  | 2.49E-07  | AAEL013616-PA OS=Aedes aegypti GN=AAEL013616 PE=4 SV=1                |
| CCG007057.1 | 1152 | 19   | 126 | 0.70870222 | 3.823561522 | 2.431665614  | Up   | 7.73E-10  | 1.60E-09  | AAEL006556-PA OS=Aedes aegypti GN=AAEL006556 PE=4 SV=1                |
| CCG015074.1 | 1227 | 22   | 126 | 0.77044349 | 3.589847493 | 2.220161509  | Up   | 8.38E-11  | 1.79E-10  | AAEL009021-PA OS=Aedes aegypti GN=AAEL009021 PE=4 SV=1                |

|             |      |      |     |            |             |              |      |           |           |                                                                                           |
|-------------|------|------|-----|------------|-------------|--------------|------|-----------|-----------|-------------------------------------------------------------------------------------------|
| CCG022548.1 | 1089 | 24   | 126 | 0.9469914  | 4.044759296 | 2.094630627  | Up   | 1.94E-11  | 4.24E-11  | Putative uncharacterized protein OS=Culex quinquefasciatus GN=CpipJ_CPIJ000812 PE=4 SV=1  |
| CCG005275.1 | 3237 | 27   | 126 | 0.35841299 | 1.360748493 | 1.924705625  | Up   | 3.76E-12  | 8.72E-12  | Putative uncharacterized protein (Fragment) OS=Solenopsis invicta GN=SINV_11683 PE=4 SV=1 |
| CCG009582.1 | 1347 | 42   | 126 | 1.33981355 | 3.270039253 | 1.287275705  | Up   | 1.17E-07  | 2.24E-07  | AAEL004995-PA (Fragment) OS=Aedes aegypti GN=AAEL004995 PE=4 SV=1                         |
| CCG003065.1 | 1559 | 44   | 126 | 1.21274427 | 2.825364255 | 1.220161509  | Up   | 3.73E-07  | 6.99E-07  | Cytochrome P450 OS=Culex quinquefasciatus GN=CpipJ_CPIJ003375 PE=3 SV=1                   |
| CCG001250.1 | 1485 | 46   | 126 | 1.33104902 | 2.966156817 | 1.156031171  | Up   | 1.11E-06  | 2.04E-06  | AAEL015072-PA OS=Aedes aegypti GN=AAEL015072 PE=4 SV=1                                    |
| CCG018778.1 | 657  | 242  | 126 | 15.8275126 | 6.704327052 | -1.23927011  | Down | 7.69E-16  | 2.81E-15  | ETS transcription factor E74A OS=Aedes aegypti GN=E74A PE=2 SV=1                          |
| CCG015315.1 | 1464 | 403  | 126 | 11.8284174 | 3.008704148 | -1.975042901 | Down | 1.13E-48  | 5.24E-48  | AAEL014361-PA OS=Aedes aegypti GN=AAEL014361 PE=4 SV=1                                    |
| CCG007024.2 | 1553 | 405  | 126 | 11.205887  | 2.836280021 | -1.98218497  | Down | 3.90E-49  | 1.81E-48  | AAEL007488-PA OS=Aedes aegypti GN=AAEL007488 PE=4 SV=1                                    |
| CCG001536.1 | 1740 | 447  | 126 | 11.0387767 | 2.531461421 | -2.124537894 | Down | 4.68E-59  | 2.25E-58  | AAEL003472-PA OS=Aedes aegypti GN=AAEL003472 PE=4 SV=1                                    |
| CCG022006.1 | 1346 | 548  | 126 | 17.4943645 | 3.272468702 | -2.418438956 | Down | 2.44E-84  | 1.25E-83  | AAEL007090-PA OS=Aedes aegypti GN=AAEL007090 PE=4 SV=1                                    |
| CCG008223.1 | 2046 | 625  | 126 | 13.1261408 | 2.152855754 | -2.608119252 | Down | 1.17E-104 | 6.25E-104 | AGAP001797-PA OS=Anopheles gambiae GN=AgaP_AGAP001797 PE=3 SV=4                           |
| CCG025266.1 | 1725 | 1157 | 126 | 28.8208597 | 2.553474129 | -3.496580022 | Down | 1.46E-258 | 9.03E-258 | AAEL008943-PA OS=Aedes aegypti GN=AAEL008943 PE=4 SV=1                                    |
| CCG021199.1 | 1269 | 0    | 127 | 0.001      | 3.498582467 | 11.77255478  | Up   | 4.44E-16  | 1.65E-15  | AAEL003128-PA OS=Aedes aegypti GN=AAEL003128 PE=4 SV=1                                    |
| CCG028017.1 | 1035 | 12   | 127 | 0.49819982 | 4.289566329 | 3.10603539   | Up   | 1.30E-07  | 2.49E-07  | AAEL013201-PA OS=Aedes aegypti GN=AAEL013201 PE=4 SV=1                                    |

|             |       |      |     |            |             |              |      |           |           |                                                                                                                                                                              |
|-------------|-------|------|-----|------------|-------------|--------------|------|-----------|-----------|------------------------------------------------------------------------------------------------------------------------------------------------------------------------------|
| CCG012402.1 | 546   | 29   | 127 | 2.28227528 | 8.131320788 | 1.833016895  | Up   | 6.80E-12  | 1.53E-11  | AAEL007332-PA OS=Aedes aegypti GN=AAEL007332 PE=4 SV=1                                                                                                                       |
| CCG004532.1 | 297   | 38   | 127 | 5.49781116 | 14.94848872 | 1.443070377  | Up   | 6.61E-09  | 1.33E-08  | AAEL010223-PA OS=Aedes aegypti GN=AAEL010223 PE=4 SV=1                                                                                                                       |
| CCG015625.1 | 1257  | 46   | 127 | 1.57248034 | 3.531981822 | 1.167435935  | Up   | 8.30E-07  | 1.53E-06  | AAEL007864-PA OS=Aedes aegypti GN=AAEL007864 PE=4 SV=1                                                                                                                       |
| CCG008122.1 | 983   | 47   | 127 | 2.0545041  | 4.516481333 | 1.136409039  | Up   | 1.41E-06  | 2.57E-06  | Putative uncharacterized protein OS=Culex quinquefasciatus GN=CpipJ_CPIJ014066 PE=4 SV=1                                                                                     |
| CCG016469.1 | 10080 | 211  | 127 | 0.89946567 | 0.440446543 | -1.030101298 | Down | 9.27E-11  | 1.98E-10  | AAEL008761-PA OS=Aedes aegypti GN=AAEL008761 PE=4 SV=1                                                                                                                       |
| CCG009497.1 | 447   | 293  | 127 | 28.1658439 | 9.932217338 | -1.503758964 | Down | 7.44E-25  | 3.02E-24  | AAEL001194-PA OS=Aedes aegypti GN=AAEL001194 PE=4 SV=1                                                                                                                       |
| CCG023794.1 | 3563  | 350  | 127 | 4.22099554 | 1.246057017 | -1.760213221 | Down | 1.64E-36  | 7.19E-36  | AAEL006476-PA OS=Aedes aegypti GN=AAEL006476 PE=4 SV=1                                                                                                                       |
| CCG010884.1 | 462   | 450  | 127 | 41.8536376 | 9.609742749 | -2.122783301 | Down | 2.23E-59  | 1.07E-58  | AAEL002309-PA OS=Aedes aegypti GN=TPX4 PE=4 SV=1                                                                                                                             |
| CCG019239.1 | 2685  | 710  | 127 | 11.3625741 | 1.653519981 | -2.780677324 | Down | 2.55E-127 | 1.41E-126 | AAEL005793-PA OS=Aedes aegypti GN=AAEL005793 PE=4 SV=1                                                                                                                       |
| CCG022052.1 | 1851  | 1117 | 127 | 25.9304125 | 2.39854195  | -3.43441558  | Down | 1.00E-245 | 6.17E-245 | AAEL004014-PA OS=Aedes aegypti GN=AAEL004014 PE=3 SV=1                                                                                                                       |
| CCG011184.1 | 1044  | 0    | 128 | 0.001      | 4.286072248 | 12.06544045  | Up   | 4.44E-16  | 1.64E-15  | AAEL013701-PA OS=Aedes aegypti GN=AAEL013701 PE=4 SV=1                                                                                                                       |
| CCG020527.1 | 414   | 2    | 128 | 0.20758326 | 10.8083561  | 5.702313204  | Up   | 9.36E-05  | 0.0001533 | -                                                                                                                                                                            |
| CCG006381.1 | 1452  | 12   | 128 | 0.35512177 | 3.081721368 | 3.117350703  | Up   | 1.30E-07  | 2.49E-07  | AAEL002462-PA OS=Aedes aegypti GN=AAEL002462 PE=4 SV=1                                                                                                                       |
| CCG025211.1 | 1447  | 20   | 128 | 0.59391478 | 3.092370025 | 2.380385109  | Up   | 3.69E-10  | 7.70E-10  | LINE-1 retrotransposon-like element, putative (Fragment) OS=Aspergillus flavus (strain ATCC 200026 / FGSC A1120 / NRRL 3357 / JCM 12722 / SRRCL167) GN=AFLA_063980 PE=4 SV=1 |
| CCG028375.1 | 682   | 23   | 128 | 1.44912595 | 6.561084204 | 2.178751248  | Up   | 4.01E-11  | 8.66E-11  | AAEL009373-PA OS=Aedes aegypti GN=AAEL009373 PE=4 SV=1                                                                                                                       |

|             |      |      |     |            |             |              |      |           |           |                                                                                          |
|-------------|------|------|-----|------------|-------------|--------------|------|-----------|-----------|------------------------------------------------------------------------------------------|
| CCG024248.1 | 609  | 31   | 128 | 2.18729355 | 7.347552425 | 1.748116893  | Up   | 2.36E-11  | 5.14E-11  | AAEL015251-PA OS=Aedes aegypti GN=AAEL015251 PE=4 SV=1                                   |
| CCG010319.1 | 1007 | 40   | 128 | 1.70684149 | 4.443554545 | 1.380385109  | Up   | 1.77E-08  | 3.50E-08  | AAEL006587-PA OS=Aedes aegypti GN=AAEL006587 PE=4 SV=1                                   |
| CCG020949.1 | 393  | 43   | 128 | 4.70152313 | 11.38590185 | 1.276048449  | Up   | 1.13E-07  | 2.16E-07  | AAEL002486-PA OS=Aedes aegypti GN=AAEL002486 PE=2 SV=1                                   |
| CCG000006.1 | 2220 | 213  | 128 | 4.12277183 | 2.015612354 | -1.032396416 | Down | 6.98E-11  | 1.50E-10  | AAEL001276-PA OS=Aedes aegypti GN=AAEL001276 PE=4 SV=1                                   |
| CCG001847.1 | 1443 | 357  | 128 | 10.6307659 | 3.100942084 | -1.77746706  | Down | 1.06E-37  | 4.70E-37  | AAEL007253-PA OS=Aedes aegypti GN=AAEL007253 PE=4 SV=1                                   |
| CCG025869.1 | 342  | 1258 | 128 | 158.058264 | 13.08379949 | -3.594603003 | Down | 8.06E-288 | 5.05E-287 | AGAP007501-PA OS=Anopheles gambiae GN=AGAP007501 PE=4 SV=4                               |
| CCG003550.1 | 1251 | 7    | 129 | 0.24043816 | 3.604810315 | 3.906185537  | Up   | 4.31E-06  | 7.69E-06  | AGAP001085-PA (Fragment) OS=Anopheles gambiae GN=AGAP001085 PE=4 SV=1                    |
| CCG007199.1 | 1245 | 10   | 129 | 0.34513843 | 3.622182894 | 3.391612364  | Up   | 5.43E-07  | 1.01E-06  | Putative uncharacterized protein OS=Culex quinquefasciatus GN=CpipJ_CPIJ013333 PE=3 SV=1 |
| CCG027970.1 | 1260 | 18   | 129 | 0.61385335 | 3.57906167  | 2.543615458  | Up   | 1.62E-09  | 3.32E-09  | AAEL013971-PA OS=Aedes aegypti GN=AAEL013971 PE=4 SV=1                                   |
| CCG005303.1 | 705  | 20   | 129 | 1.21899956 | 6.396620856 | 2.391612364  | Up   | 3.69E-10  | 7.71E-10  | AAEL007570-PA OS=Aedes aegypti GN=AAEL007570 PE=4 SV=1                                   |
| CCG024756.1 | 843  | 23   | 129 | 1.17236524 | 5.349487193 | 2.189978503  | Up   | 4.01E-11  | 8.66E-11  | AAEL005243-PA OS=Aedes aegypti GN=CLIPB13A PE=3 SV=1                                     |
| CCG008854.1 | 771  | 28   | 129 | 1.56050917 | 5.849050199 | 1.906185537  | Up   | 2.28E-12  | 5.42E-12  | Putative uncharacterized protein OS=Culex quinquefasciatus GN=CpipJ_CPIJ006402 PE=4 SV=1 |
| CCG025034.1 | 954  | 33   | 129 | 1.48637447 | 4.727062582 | 1.66914634   | Up   | 8.21E-11  | 1.76E-10  | AAEL011524-PA OS=Aedes aegypti GN=AAEL011524 PE=4 SV=1                                   |
| CCG002513.1 | 1069 | 34   | 129 | 1.3666707  | 4.218538544 | 1.626077618  | Up   | 1.80E-10  | 3.81E-10  | AAEL005465-PA OS=Aedes aegypti GN=AAEL005465 PE=4 SV=1                                   |
| CCG023749.1 | 2562 | 35   | 129 | 0.58701823 | 1.760194264 | 1.584257442  | Up   | 3.85E-10  | 8.05E-10  | AAEL004320-PA OS=Aedes aegypti GN=AAEL004320 PE=4 SV=1                                   |



|             |      |     |     |            |             |              |      |           |            |                                                                                           |
|-------------|------|-----|-----|------------|-------------|--------------|------|-----------|------------|-------------------------------------------------------------------------------------------|
| CCG021992.1 | 306  | 38  | 129 | 5.33611083 | 14.73731276 | 1.465612946  | Up   | 3.33E-09  | 6.78E-09   | AAEL012732-PA OS=Aedes aegypti GN=AAEL012732 PE=4 SV=1                                    |
| CCG017441.1 | 659  | 41  | 129 | 2.67338258 | 6.843122464 | 1.355988455  | Up   | 2.41E-08  | 4.75E-08   | -                                                                                         |
| CCG027321.1 | 1491 | 44  | 129 | 1.26805387 | 3.024559157 | 1.254108841  | Up   | 1.48E-07  | 2.82E-07   | AAEL000559-PA OS=Aedes aegypti GN=AAEL000559 PE=4 SV=1                                    |
| CCG024665.1 | 1770 | 47  | 129 | 1.14100425 | 2.547806612 | 1.158951608  | Up   | 7.87E-07  | 1.45E-06   | AAEL010856-PA OS=Aedes aegypti GN=AAEL010856 PE=4 SV=1                                    |
| CCG002273.1 | 2342 | 48  | 129 | 0.88067774 | 1.925541291 | 1.128577959  | Up   | 1.33E-06  | 2.43E-06   | Putative uncharacterized protein OS=Culex quinquefasciatus GN=CpipJ_CPIJ018868 PE=4 SV=1  |
| CCG000960.1 | 1262 | 49  | 129 | 1.66839699 | 3.573389623 | 1.098830615  | Up   | 2.21E-06  | 4.01E-06   | AAEL014548-PA (Fragment) OS=Aedes aegypti GN=TPX3 PE=4 SV=2                               |
| CCG008237.1 | 1080 | 219 | 129 | 8.7133073  | 4.175571948 | -1.0612466   | Down | 1.34E-11  | 2.96E-11   | AAEL014272-PA OS=Aedes aegypti GN=AAEL014272 PE=4 SV=1                                    |
| CCG015971.1 | 1723 | 304 | 129 | 7.58142735 | 2.61730569  | -1.534387054 | Down | 1.83E-26  | 7.54E-26   | AAEL007293-PA OS=Aedes aegypti GN=AAEL007293 PE=2 SV=1                                    |
| CCG010039.1 | 1572 | 561 | 129 | 15.334619  | 2.868713552 | -2.418316501 | Down | 2.72E-86  | 1.40E-85   | Fatty acyl-CoA reductase 1 OS=Culex quinquefasciatus GN=CpipJ_CPIJ017921 PE=4 SV=1        |
| CCG012956.1 | 891  | 798 | 129 | 38.4846781 | 5.061299331 | -2.926704477 | Down | 8.06E-151 | 4.58E-150  | AAEL000585-PA OS=Aedes aegypti GN=AAEL006585 PE=3 SV=1                                    |
| CCG016850.2 | 1675 | 0   | 130 | 0.001      | 2.71317969  | 11.40576888  | Up   | 4.44E-16  | 1.66E-15   | Alkaline phosphatase OS=Culex quinquefasciatus GN=CpipJ_CPIJ001263 PE=3 SV=1              |
| CCG011546.1 | 324  | 1   | 130 | 0.13262264 | 14.02646908 | 6.724681017  | Up   | 0.000587  | 0.00091706 | -                                                                                         |
| CCG014279.1 | 1035 | 11  | 130 | 0.45668317 | 4.390894667 | 3.265249398  | Up   | 2.67E-07  | 5.03E-07   | AAEL007934-PA OS=Aedes aegypti GN=AAEL007934 PE=3 SV=1                                    |
| CCG016577.1 | 1539 | 13  | 130 | 0.36296722 | 2.952940858 | 3.024241299  | Up   | 6.34E-08  | 1.23E-07   | AAEL010081-PA OS=Aedes aegypti GN=AAEL010081 PE=4 SV=1                                    |
| CCG005796.1 | 498  | 16  | 130 | 1.38055372 | 9.125654579 | 2.724681017  | Up   | 7.09E-09  | 1.42E-08   | AAEL012441-PA OS=Aedes aegypti GN=AAEL012441 PE=4 SV=1                                    |
| CCG000455.1 | 963  | 19  | 130 | 0.84779331 | 4.719185857 | 2.476753503  | Up   | 7.73E-10  | 1.60E-09   | Putative uncharacterized protein (Fragment) OS=Solenopsis invicta GN=SINV_13182 PE=4 SV=1 |

|             |      |      |     |            |             |              |      |           |           |                                                                                          |
|-------------|------|------|-----|------------|-------------|--------------|------|-----------|-----------|------------------------------------------------------------------------------------------|
| CCG006830.1 | 1773 | 22   | 130 | 0.5331834  | 2.563212623 | 2.265249398  | Up   | 8.38E-11  | 1.79E-10  | AAEL010576-PA OS=Aedes aegypti GN=AAEL010576 PE=4 SV=1                                   |
| CCG018209.1 | 1212 | 24   | 130 | 0.85088583 | 3.749650149 | 2.139718516  | Up   | 1.93E-11  | 4.23E-11  | AAEL006233-PA OS=Aedes aegypti GN=AAEL006233 PE=4 SV=1                                   |
| CCG008497.1 | 1246 | 26   | 130 | 0.89663973 | 3.647332248 | 2.024241299  | Up   | 4.70E-12  | 1.07E-11  | AAEL007257-PA OS=Aedes aegypti GN=AAEL007257 PE=4 SV=1                                   |
| CCG004877.1 | 4482 | 32   | 130 | 0.30678972 | 1.01396162  | 1.724681017  | Up   | 2.52E-11  | 5.49E-11  | -                                                                                        |
| CCG027876.1 | 556  | 38   | 130 | 2.93678042 | 8.173697806 | 1.476753503  | Up   | 2.36E-09  | 4.82E-09  | Putative uncharacterized protein OS=Culex quinquefasciatus GN=CpipJ_CPIJ001639 PE=4 SV=1 |
| CCG015050.1 | 429  | 43   | 130 | 4.30698972 | 10.5934172  | 1.298416262  | Up   | 6.01E-08  | 1.17E-07  | AAEL013776-PA OS=Aedes aegypti GN=AAEL013776 PE=4 SV=1                                   |
| CCG005683.1 | 303  | 51   | 130 | 7.23252959 | 14.9986006  | 1.052255675  | Up   | 4.48E-06  | 7.98E-06  | AGAP007325-PA OS=Anopheles gambiae GN=AGAP007325 PE=4 SV=3                               |
| CCG008253.1 | 1214 | 241  | 130 | 8.53023562 | 3.743472801 | -1.188208319 | Down | 7.40E-15  | 2.66E-14  | AAEL007748-PA OS=Aedes aegypti GN=SCRB10 PE=4 SV=2                                       |
| CCG022009.1 | 662  | 304  | 130 | 19.7323253 | 6.864918399 | -1.523246497 | Down | 3.39E-26  | 1.39E-25  | -                                                                                        |
| CCG022540.1 | 1125 | 489  | 130 | 18.6775113 | 4.039623094 | -2.209009638 | Down | 1.19E-67  | 5.86E-67  | AAEL006601-PA (Fragment) OS=Aedes aegypti GN=AAEL006601 PE=4 SV=1                        |
| CCG000288.1 | 279  | 1305 | 130 | 200.987468 | 16.2888028  | -3.625153075 | Down | 1.14E-300 | 7.19E-300 | AAEL009695-PA (Fragment) OS=Aedes aegypti GN=AAEL009695 PE=4 SV=1                        |
| CCG006519.1 | 576  | 4    | 131 | 0.29840093 | 7.950580308 | 4.735736205  | Up   | 2.95E-05  | 5.02E-05  | AAEL009491-PA OS=Aedes aegypti GN=AAEL009491 PE=4 SV=1                                   |
| CCG021731.1 | 507  | 15   | 131 | 1.27129392 | 9.032611947 | 2.82884561   | Up   | 1.48E-08  | 2.93E-08  | AAEL003752-PA OS=Aedes aegypti GN=AAEL003752 PE=4 SV=1                                   |
| CCG011717.1 | 1017 | 28   | 131 | 1.18304087 | 4.502983537 | 1.928381283  | Up   | 1.66E-12  | 4.00E-12  | AAEL005443-PA (Fragment) OS=Aedes aegypti GN=AAEL005443 PE=4 SV=1                        |
| CCG013851.1 | 1131 | 37   | 131 | 1.4057296  | 4.049101907 | 1.52628284   | Up   | 8.22E-10  | 1.70E-09  | AAEL001664-PA OS=Aedes aegypti GN=AAEL001664 PE=4 SV=1                                   |
| CCG006213.1 | 1011 | 38   | 131 | 1.61508399 | 4.529707475 | 1.487808692  | Up   | 1.67E-09  | 3.42E-09  | AAEL013240-PA OS=Aedes aegypti GN=AAEL013240 PE=4 SV=1                                   |

|             |      |     |     |            |             |              |      |           |            |                                                                                          |
|-------------|------|-----|-----|------------|-------------|--------------|------|-----------|------------|------------------------------------------------------------------------------------------|
| CCG020511.1 | 2310 | 48  | 131 | 0.8928776  | 1.982482362 | 1.150773705  | Up   | 7.45E-07  | 1.38E-06   | AAEL014541-PA OS=Aedes aegypti GN=AAEL014541 PE=4 SV=1                                   |
| CCG024365.1 | 680  | 52  | 131 | 3.28592088 | 6.734609202 | 1.035296487  | Up   | 5.49E-06  | 9.75E-06   | AAEL007059-PA OS=Aedes aegypti GN=AAEL007059 PE=4 SV=1                                   |
| CCG013661.1 | 1177 | 288 | 131 | 10.5142596 | 3.890853235 | -1.434188796 | Down | 6.97E-23  | 2.79E-22   | -                                                                                        |
| CCG007827.1 | 843  | 387 | 131 | 19.7263194 | 5.432424979 | -1.860453551 | Down | 2.75E-43  | 1.25E-42   | AAEL005072-PA OS=Aedes aegypti GN=AAEL005072 PE=4 SV=1                                   |
| CCG005974.1 | 873  | 887 | 131 | 43.6588254 | 5.245743708 | -3.057054089 | Down | 4.85E-175 | 2.83E-174  | AAEL001293-PA OS=Aedes aegypti GN=CRALBP2 PE=2 SV=1                                      |
| CCG019440.1 | 1344 | 1   | 132 | 0.03197153 | 3.433402183 | 6.746707323  | Up   | 0.000587  | 0.00091728 | AAEL008449-PA OS=Aedes aegypti GN=AAEL008449 PE=4 SV=1                                   |
| CCG015731.1 | 437  | 8   | 132 | 0.7866313  | 10.55947948 | 3.746707323  | Up   | 2.19E-06  | 3.96E-06   | -                                                                                        |
| CCG000951.1 | 1903 | 17  | 132 | 0.38385995 | 2.424851568 | 2.659244482  | Up   | 3.39E-09  | 6.88E-09   | AAEL008161-PA (Fragment) OS=Aedes aegypti GN=AAEL008161 PE=4 SV=1                        |
| CCG005883.1 | 639  | 21  | 132 | 1.4121509  | 7.221428066 | 2.3543899    | Up   | 1.76E-10  | 3.73E-10   | AAEL012109-PA OS=Aedes aegypti GN=AAEL012109 PE=4 SV=1                                   |
| CCG012783.1 | 2573 | 22  | 132 | 0.36740543 | 1.79342889  | 2.287275705  | Up   | 8.38E-11  | 1.79E-10   | AAEL011355-PA OS=Aedes aegypti GN=AAEL011355 PE=3 SV=1                                   |
| CCG012751.1 | 1218 | 24  | 132 | 0.84669428 | 3.788581719 | 2.161744822  | Up   | 1.93E-11  | 4.23E-11   | Putative uncharacterized protein OS=Culex quinquefasciatus GN=CpipJ_CPIJ003370 PE=4 SV=1 |
| CCG011181.1 | 705  | 25  | 132 | 1.52374945 | 6.545379481 | 2.102851133  | Up   | 9.34E-12  | 2.08E-11   | AAEL007570-PA OS=Aedes aegypti GN=AAEL007570 PE=4 SV=1                                   |
| CCG007331.2 | 999  | 30  | 132 | 1.29038242 | 4.619111646 | 1.839816728  | Up   | 2.44E-12  | 5.76E-12   | AAEL000091-PA OS=Aedes aegypti GN=AAEL000091 PE=4 SV=1                                   |
| CCG012149.1 | 1128 | 34  | 132 | 1.29518704 | 4.090862175 | 1.659244482  | Up   | 5.94E-11  | 1.28E-10   | AAEL012136-PA OS=Aedes aegypti GN=AAEL012136 PE=4 SV=1                                   |
| CCG005448.2 | 1629 | 42  | 132 | 1.10787529 | 2.832714877 | 1.3543899    | Up   | 1.70E-08  | 3.37E-08   | AAEL011911-PA OS=Aedes aegypti GN=AAEL011911 PE=4 SV=1                                   |
| CCG015411.1 | 1017 | 51  | 132 | 2.15482445 | 4.537357457 | 1.074281981  | Up   | 2.58E-06  | 4.65E-06   | AAEL004050-PA OS=Aedes aegypti GN=AAEL004050 PE=4 SV=1                                   |
| CCG025817.1 | 1654 | 52  | 132 | 1.35092273 | 2.789898751 | 1.046267605  | Up   | 4.19E-06  | 7.49E-06   | AAEL015124-PA OS=Aedes aegypti GN=AAEL015124 PE=4 SV=1                                   |

|             |      |      |     |            |             |              |      |           |            |                                                                           |
|-------------|------|------|-----|------------|-------------|--------------|------|-----------|------------|---------------------------------------------------------------------------|
| CCG010594.1 | 1848 | 221  | 132 | 5.13869662 | 2.497019769 | -1.041195236 | Down | 2.24E-11  | 4.90E-11   | AAEL000250-PA OS=Aedes aegypti GN=AAEL000250 PE=4 SV=1                    |
| CCG007004.1 | 885  | 273  | 132 | 13.2550707 | 5.214115858 | -1.346049818 | Down | 6.68E-20  | 2.60E-19   | Seadex OS=Culex quinquefasciatus GN=CpipJ_CPIJ016520 PE=4 SV=1            |
| CCG025370.1 | 2116 | 288  | 132 | 5.84843269 | 2.180762067 | -1.423217678 | Down | 1.23E-22  | 4.91E-22   | AAEL000621-PA OS=Aedes aegypti GN=AAEL006620 PE=4 SV=1                    |
| CCG004609.1 | 2537 | 352  | 132 | 5.96190248 | 1.818877625 | -1.712724295 | Down | 2.24E-35  | 9.73E-35   | AAEL013991-PA OS=Aedes aegypti GN=AAEL013991 PE=4 SV=1                    |
| CCG000472.1 | 1815 | 389  | 132 | 9.20949133 | 2.542420129 | -1.856919022 | Down | 2.16E-43  | 9.78E-43   | AAEL008559-PA OS=Aedes aegypti GN=AAEL008559 PE=3 SV=1                    |
| CCG022627.1 | 1389 | 446  | 132 | 13.7973374 | 3.322168851 | -2.054192577 | Down | 1.81E-56  | 8.63E-56   | AAEL001110-PA OS=Aedes aegypti GN=AAEL001110 PE=4 SV=1                    |
| CCG008575.1 | 807  | 670  | 132 | 35.6749965 | 5.718082446 | -2.641309962 | Down | 1.16E-113 | 6.28E-113  | Putative secreted protein OS=Aedes aegypti PE=2 SV=1                      |
| CCG002194.1 | 861  | 1908 | 132 | 95.2221297 | 5.359457066 | -4.151138133 | Down | 0         | 0          | AAEL004264-PA OS=Aedes aegypti GN=AAEL004264 PE=4 SV=1                    |
| CCG008173.1 | 3822 | 2    | 133 | 0.02248547 | 1.216496811 | 5.757595639  | Up   | 9.36E-05  | 0.00015396 | AAEL002094-PA OS=Aedes aegypti GN=AAEL002094 PE=4 SV=1                    |
| CCG002319.1 | 894  | 2    | 133 | 0.09612916 | 5.200727976 | 5.757595639  | Up   | 9.36E-05  | 0.00015381 | AGAP005746-PA OS=Anopheles gambiae GN=AGAP005746 PE=4 SV=3                |
| CCG000595.1 | 1230 | 13   | 133 | 0.45415167 | 3.78004131  | 3.057155921  | Up   | 6.34E-08  | 1.23E-07   | AAEL000699-PA OS=Aedes aegypti GN=AAEL000699 PE=4 SV=1                    |
| CCG005340.1 | 444  | 19   | 133 | 1.83879495 | 10.47173606 | 2.509668126  | Up   | 7.73E-10  | 1.60E-09   | AAEL014251-PA OS=Aedes aegypti GN=IAP5 PE=4 SV=1                          |
| CCG013879.1 | 480  | 22   | 133 | 1.96944617 | 9.686355856 | 2.298164021  | Up   | 8.38E-11  | 1.79E-10   | AAEL009170-PA OS=Aedes aegypti GN=AAEL009170 PE=3 SV=1                    |
| CCG007998.1 | 615  | 25   | 133 | 1.74673718 | 7.560082619 | 2.11373945   | Up   | 9.33E-12  | 2.08E-11   | -                                                                         |
| CCG028092.1 | 1188 | 28   | 133 | 1.01275469 | 3.913679134 | 1.950240717  | Up   | 1.39E-12  | 3.36E-12   | AAEL005905-PA OS=Aedes aegypti GN=AAEL005905 PE=4 SV=1                    |
| CCG003069.1 | 1171 | 28   | 133 | 1.02745736 | 3.970495995 | 1.950240717  | Up   | 1.39E-12  | 3.36E-12   | AAEL008821-PA OS=Aedes aegypti GN=AAEL008821 PE=4 SV=1                    |
| CCG017959.1 | 537  | 31   | 133 | 2.48056196 | 8.658195178 | 1.803399329  | Up   | 3.60E-12  | 8.37E-12   | Predicted protein OS=Culex quinquefasciatus GN=CpipJ_CPIJ016891 PE=4 SV=1 |

|             |      |     |     |            |             |              |      |           |            |                                                                   |
|-------------|------|-----|-----|------------|-------------|--------------|------|-----------|------------|-------------------------------------------------------------------|
| CCG017141.1 | 1546 | 36  | 133 | 1.0005889  | 3.007406734 | 1.587670638  | Up   | 1.93E-10  | 4.07E-10   | AAEL005635-PA OS=Aedes aegypti GN=AAEL005635 PE=4 SV=1            |
| CCG008665.1 | 1410 | 44  | 133 | 1.34089952 | 3.297482844 | 1.298164021  | Up   | 4.24E-08  | 8.26E-08   | AAEL008476-PA OS=Aedes aegypti GN=AAEL008476 PE=4 SV=1            |
| CCG023008.1 | 837  | 46  | 133 | 2.36153858 | 5.554899415 | 1.234033683  | Up   | 1.37E-07  | 2.60E-07   | AAEL011338-PA OS=Aedes aegypti GN=AAEL011338 PE=4 SV=1            |
| CCG022656.1 | 2388 | 46  | 133 | 0.82772521 | 1.947006202 | 1.234033683  | Up   | 1.37E-07  | 2.60E-07   | AAEL007981-PA OS=Aedes aegypti GN=AAEL007981 PE=4 SV=1            |
| CCG009467.1 | 786  | 47  | 133 | 2.56943706 | 5.91533182  | 1.203006788  | Up   | 2.40E-07  | 4.53E-07   | -                                                                 |
| CCG017633.1 | 1764 | 53  | 133 | 1.29104078 | 2.63574309  | 1.029675185  | Up   | 5.12E-06  | 9.11E-06   | AAEL014606-PA OS=Aedes aegypti GN=CYP9J7 PE=3 SV=1                |
| CCG008576.1 | 2607 | 331 | 133 | 5.45568936 | 1.783448719 | -1.613091767 | Down | 9.77E-31  | 4.13E-30   | AAEL007704-PA OS=Aedes aegypti GN=AAEL007704 PE=4 SV=1            |
| CCG022580.1 | 870  | 361 | 133 | 17.8299703 | 5.344196334 | -1.738259388 | Down | 5.66E-37  | 2.48E-36   | AAEL006921-PA OS=Aedes aegypti GN=AAEL006921 PE=4 SV=1            |
| CCG007254.1 | 2868 | 419 | 133 | 6.27765649 | 1.621147424 | -1.953210794 | Down | 8.19E-50  | 3.82E-49   | AAEL002536-PA (Fragment) OS=Aedes aegypti GN=AAEL002536 PE=4 SV=1 |
| CCG000813.1 | 600  | 710 | 133 | 50.8475193 | 7.749084685 | -2.714079575 | Down | 5.19E-124 | 2.86E-123  | AAEL009112-PA OS=Aedes aegypti GN=AAEL009112 PE=4 SV=1            |
| CCG008244.1 | 1260 | 2   | 134 | 0.06820593 | 3.71778499  | 5.768402394  | Up   | 9.36E-05  | 0.00015384 | Putative salivary serpin OS=Aedes albopictus PE=2 SV=1            |
| CCG025926.1 | 941  | 5   | 134 | 0.22831953 | 4.978118053 | 4.446474299  | Up   | 1.59E-05  | 2.76E-05   | AAEL000659-PA OS=Aedes aegypti GN=AAEL000659 PE=4 SV=1            |
| CCG001428.1 | 2808 | 14  | 134 | 0.21423657 | 1.668236855 | 2.961047472  | Up   | 3.07E-08  | 6.00E-08   | AAEL003392-PA OS=Aedes aegypti GN=AAEL003392 PE=4 SV=1            |
| CCG024893.1 | 1703 | 17  | 134 | 0.42894039 | 2.750680615 | 2.680939553  | Up   | 3.39E-09  | 6.90E-09   | AAEL010498-PA OS=Aedes aegypti GN=AAEL010498 PE=4 SV=1            |
| CCG005075.1 | 1081 | 34  | 134 | 1.35149952 | 4.333403411 | 1.680939553  | Up   | 2.82E-11  | 6.14E-11   | AAEL006285-PA OS=Aedes aegypti GN=AAEL006285 PE=4 SV=1            |
| CCG001996.1 | 1122 | 40  | 134 | 1.53189785 | 4.175052663 | 1.446474299  | Up   | 2.36E-09  | 4.83E-09   | AAEL012136-PA OS=Aedes aegypti GN=AAEL012136 PE=4 SV=1            |
| CCG006828.1 | 1590 | 53  | 134 | 1.43232449 | 2.946169237 | 1.04048194   | Up   | 3.91E-06  | 7.00E-06   | AAEL002279-PA OS=Aedes aegypti GN=AAEL002279 PE=4 SV=1            |

|             |      |     |     |            |             |              |      |           |           |                                                                                                   |
|-------------|------|-----|-----|------------|-------------|--------------|------|-----------|-----------|---------------------------------------------------------------------------------------------------|
| CCG012195.1 | 870  | 225 | 134 | 11.1128624 | 5.384378261 | -1.045378797 | Down | 1.27E-11  | 2.81E-11  | Uncharacterized protein<br>OS=Anopheles darlingi<br>GN=AND_01420 PE=3 SV=1                        |
| CCG006261.1 | 1224 | 227 | 134 | 7.96906026 | 3.827131607 | -1.058146093 | Down | 6.41E-12  | 1.44E-11  | AAEL008584-PA OS=Aedes<br>aegypti GN=AAEL008584 PE=4<br>SV=1                                      |
| CCG001336.1 | 285  | 250 | 134 | 37.6927497 | 16.43652311 | -1.19738189  | Down | 1.58E-15  | 5.75E-15  | AAEL005523-PA OS=Aedes<br>aegypti GN=AAEL005523 PE=4<br>SV=1                                      |
| CCG018417.1 | 522  | 319 | 134 | 26.2592823 | 8.973963769 | -1.549010219 | Down | 4.65E-28  | 1.93E-27  | GK19301 OS=Drosophila willistoni<br>GN=GK19301 PE=4 SV=1                                          |
| CCG003947.1 | 2130 | 367 | 134 | 7.40370545 | 2.199253093 | -1.751233859 | Down | 6.11E-38  | 2.70E-37  | Serine/threonine-protein<br>phosphatase OS=Aedes aegypti<br>GN=AAEL003322 PE=3 SV=1               |
| CCG011220.1 | 1560 | 405 | 134 | 11.1556042 | 3.002826338 | -1.893375703 | Down | 2.78E-46  | 1.28E-45  | AAEL014361-PA OS=Aedes<br>aegypti GN=AAEL014361 PE=4<br>SV=1                                      |
| CCG018926.1 | 535  | 475 | 134 | 38.150699  | 8.755904836 | -2.123381309 | Down | 1.33E-62  | 6.45E-62  | -                                                                                                 |
| CCG011271.1 | 1648 | 616 | 134 | 16.0615027 | 2.842481242 | -2.498384146 | Down | 3.05E-98  | 1.61E-97  | -                                                                                                 |
| CCG023249.1 | 945  | 668 | 134 | 30.3743732 | 4.957046653 | -2.615301898 | Down | 4.45E-112 | 2.40E-111 | AAEL003720-PA (Fragment)<br>OS=Aedes aegypti<br>GN=AAEL003720 PE=4 SV=1                           |
| CCG026879.1 | 571  | 12  | 135 | 0.90304171 | 8.265091706 | 3.1941663    | Up   | 1.30E-07  | 2.49E-07  | -                                                                                                 |
| CCG006690.1 | 832  | 40  | 135 | 2.06585263 | 5.672316544 | 1.457200706  | Up   | 1.68E-09  | 3.44E-09  | Putative uncharacterized protein<br>OS=Culex quinquefasciatus<br>GN=CpipJ_CPIJ014888 PE=4<br>SV=1 |
| CCG018553.1 | 1294 | 224 | 135 | 7.43834664 | 3.647115428 | -1.028226121 | Down | 2.64E-11  | 5.76E-11  | AAEL000164-PA OS=Aedes<br>aegypti GN=AAEL000164 PE=4<br>SV=1                                      |
| CCG008151.1 | 1854 | 231 | 135 | 5.35383425 | 2.54550559  | -1.072620241 | Down | 2.41E-12  | 5.70E-12  | AAEL000487-PA OS=Aedes<br>aegypti GN=AAEL006487 PE=3<br>SV=1                                      |
| CCG008275.1 | 1341 | 305 | 135 | 9.77313129 | 3.519289608 | -1.473536632 | Down | 4.41E-25  | 1.79E-24  | AAEL002433-PA OS=Aedes<br>aegypti GN=AAEL002433 PE=4<br>SV=1                                      |
| CCG001833.1 | 7170 | 407 | 135 | 2.43914672 | 0.658210232 | -1.889756183 | Down | 2.20E-46  | 1.01E-45  | AAEL005720-PA OS=Aedes<br>aegypti GN=AAEL005720 PE=4<br>SV=1                                      |
| CCG026151.1 | 1836 | 438 | 135 | 10.2509498 | 2.570461527 | -1.995658259 | Down | 1.82E-53  | 8.62E-53  | Transporter OS=Aedes aegypti<br>GN=AAEL003860 PE=3 SV=1                                           |
| CCG016079.1 | 978  | 609 | 135 | 26.7572274 | 4.825529002 | -2.471169617 | Down | 6.41E-96  | 3.37E-95  | AAEL000049-PA OS=Aedes<br>aegypti GN=AAEL000049 PE=4<br>SV=1                                      |

|             |      |      |     |            |             |              |      |           |           |                                                                                                            |
|-------------|------|------|-----|------------|-------------|--------------|------|-----------|-----------|------------------------------------------------------------------------------------------------------------|
| CCG023108.1 | 2381 | 912  | 135 | 16.458798  | 1.982094651 | -3.053761213 | Down | 9.98E-180 | 5.84E-179 | AAEL005003-PA OS=Aedes aegypti GN=AAEL005003 PE=3 SV=1                                                     |
| CCG011355.1 | 621  | 0    | 136 | 0.001      | 7.655918907 | 12.90235983  | Up   | 4.44E-16  | 1.65E-15  | -                                                                                                          |
| CCG003102.1 | 453  | 12   | 136 | 1.13827112 | 10.49520009 | 3.204813544  | Up   | 1.30E-07  | 2.49E-07  | AAEL002157-PA OS=Aedes aegypti GN=AAEL002157 PE=4 SV=1                                                     |
| CCG016016.1 | 1425 | 14   | 136 | 0.4221588  | 3.336368871 | 2.982421123  | Up   | 3.07E-08  | 6.00E-08  | AAEL006747-PA OS=Aedes aegypti GN=AAEL006747 PE=4 SV=1                                                     |
| CCG019333.1 | 430  | 14   | 136 | 1.39901462 | 11.05657126 | 2.982421123  | Up   | 3.07E-08  | 6.01E-08  | DNA-directed RNA polymerase subunit OS=Aedes aegypti GN=AAEL010468 PE=3 SV=1                               |
| CCG006679.1 | 1860 | 22   | 136 | 0.50824417 | 2.556089054 | 2.330344426  | Up   | 8.38E-11  | 1.80E-10  | Putative uncharacterized protein OS=Culex quinquefasciatus GN=CpipJ_CPIJ006366 PE=4 SV=1                   |
| CCG000158.1 | 447  | 22   | 136 | 2.11484152 | 10.63607526 | 2.330344426  | Up   | 8.38E-11  | 1.80E-10  | Transcription initiation factor IIA subunit 2 OS=Aedes aegypti GN=AAEL002140 PE=3 SV=1                     |
| CCG012176.1 | 459  | 24   | 136 | 2.24678351 | 10.35800793 | 2.204813544  | Up   | 1.93E-11  | 4.23E-11  | Mod(Mdg4)-h55.7b OS=Anopheles gambiae GN=mod(mdg4) PE=4 SV=1                                               |
| CCG006237.1 | 2646 | 32   | 136 | 0.51966421 | 1.796797294 | 1.789776045  | Up   | 2.66E-12  | 6.26E-12  | Retrovirus-related Pol polyprotein from transposon TNT 1-94 OS=Trichinella spiralis GN=Tsp_01017 PE=4 SV=1 |
| CCG022936.1 | 985  | 40   | 136 | 1.74496384 | 4.826726539 | 1.46784795   | Up   | 1.19E-09  | 2.46E-09  | AAEL014289-PA OS=Aedes aegypti GN=AAEL014289 PE=4 SV=1                                                     |
| CCG008721.1 | 333  | 1075 | 136 | 138.71611  | 14.27725418 | -3.280344899 | Down | 9.10E-227 | 5.53E-226 | AAEL006662-PA OS=Aedes aegypti GN=AAEL006662 PE=4 SV=1                                                     |
| CCG003570.1 | 867  | 1204 | 136 | 59.6719267 | 5.483651258 | -3.443843632 | Down | 2.28E-265 | 1.42E-264 | Putative uncharacterized protein OS=Culex quinquefasciatus GN=CpipJ_CPIJ014232 PE=4 SV=1                   |
| CCG020739.1 | 624  | 0    | 137 | 0.001      | 7.675134484 | 12.90597631  | Up   | 4.44E-16  | 1.65E-15  | AAEL008570-PA OS=Aedes aegypti GN=AAEL008570 PE=3 SV=1                                                     |
| CCG018706.1 | 1306 | 0    | 137 | 0.001      | 3.667139294 | 11.84043935  | Up   | 4.44E-16  | 1.64E-15  | AAEL007131-PA OS=Aedes aegypti GN=AAEL007131 PE=4 SV=1                                                     |

|             |      |      |     |            |             |              |      |           |            |                                                                              |
|-------------|------|------|-----|------------|-------------|--------------|------|-----------|------------|------------------------------------------------------------------------------|
| CCG008860.1 | 882  | 2    | 137 | 0.09743704 | 5.430027118 | 5.800345287  | Up   | 9.36E-05  | 0.00015408 | Pyrroline-5-carboxylate reductase<br>OS=Aedes aegypti GN=P5CR-1<br>PE=2 SV=1 |
| CCG006977.1 | 906  | 5    | 137 | 0.23713982 | 5.28618534  | 4.478417192  | Up   | 1.59E-05  | 2.76E-05   | -                                                                            |
| CCG021641.1 | 786  | 6    | 137 | 0.32801324 | 6.093236537 | 4.215382786  | Up   | 8.38E-06  | 1.47E-05   | AAEL012659-PA OS=Aedes<br>aegypti GN=AAEL012659 PE=4<br>SV=1                 |
| CCG005937.1 | 2946 | 29   | 137 | 0.42298788 | 1.6256904   | 1.942364292  | Up   | 7.77E-13  | 1.95E-12   | AAEL009477-PA OS=Aedes<br>aegypti GN=AAEL009477 PE=4<br>SV=1                 |
| CCG022395.1 | 612  | 53   | 137 | 3.72123519 | 7.825627317 | 1.072424832  | Up   | 1.72E-06  | 3.13E-06   | AAEL007994-PA OS=Aedes<br>aegypti GN=AAEL007994 PE=4<br>SV=1                 |
| CCG013934.1 | 1743 | 332  | 137 | 8.18471135 | 2.747724566 | -1.574694145 | Down | 8.21E-30  | 3.45E-29   | AAEL000523-PA OS=Aedes<br>aegypti GN=AAEL000523 PE=4<br>SV=1                 |
| CCG016257.1 | 537  | 366  | 137 | 29.2866348 | 8.918592026 | -1.715354552 | Down | 8.56E-37  | 3.75E-36   | Takeout OS=Aedes aegypti PE=2<br>SV=1                                        |
| CCG016865.1 | 2114 | 1051 | 137 | 21.3629097 | 2.265508003 | -3.237201667 | Down | 5.53E-219 | 3.34E-218  | AAEL007103-PA OS=Aedes<br>aegypti GN=AAEL007103 PE=4<br>SV=1                 |
| CCG012957.1 | 2865 | 3892 | 137 | 58.3728472 | 1.671652327 | -5.125950708 | Down | 0         | 0          | AAEL006584-PA OS=Aedes<br>aegypti GN=AAEL006584 PE=4<br>SV=1                 |
| CCG021940.1 | 555  | 3    | 138 | 0.23226884 | 8.692328279 | 5.22587516   | Up   | 5.28E-05  | 8.83E-05   | AAEL002427-PA OS=Aedes<br>aegypti GN=AAEL002427 PE=4<br>SV=1                 |
| CCG024063.1 | 1437 | 24   | 138 | 0.71765736 | 3.357162279 | 2.22587516   | Up   | 1.93E-11  | 4.23E-11   | AAEL005570-PA OS=Aedes<br>aegypti GN=AAEL005570 PE=4<br>SV=1                 |
| CCG026485.1 | 1058 | 27   | 138 | 1.09658113 | 4.559775231 | 2.055950158  | Up   | 2.29E-12  | 5.43E-12   | AAEL009649-PA OS=Aedes<br>aegypti GN=AAEL009649 PE=4<br>SV=1                 |
| CCG016686.1 | 2136 | 39   | 138 | 0.78455976 | 2.258540353 | 1.525435442  | Up   | 2.94E-10  | 6.18E-10   | AAEL012047-PA OS=Aedes<br>aegypti GN=AAEL012047 PE=4<br>SV=1                 |
| CCG027779.1 | 1509 | 258  | 138 | 7.34671407 | 3.196979586 | -1.200389595 | Down | 4.93E-16  | 1.80E-15   | AAEL013791-PA OS=Aedes<br>aegypti GN=AAEL013791 PE=4<br>SV=1                 |
| CCG001301.1 | 1411 | 315  | 138 | 9.59281814 | 3.419023526 | -1.488370358 | Down | 3.22E-26  | 1.32E-25   | AAEL004097-PA OS=Aedes<br>aegypti GN=AAEL004097 PE=4<br>SV=1                 |
| CCG015773.1 | 504  | 336  | 138 | 28.6464897 | 9.571909116 | -1.581479762 | Down | 2.48E-30  | 1.04E-29   | AAEL007682-PA OS=Aedes<br>aegypti GN=AAEL007682 PE=4<br>SV=1                 |
| CCG002321.1 | 1413 | 421  | 138 | 12.8027306 | 3.414184143 | -1.906838762 | Down | 1.71E-48  | 7.92E-48   | Oxysterol-binding protein<br>OS=Aedes aegypti<br>GN=AAEL012056 PE=3 SV=1     |



|             |      |      |     |            |             |              |      |           |           |                                                                                           |
|-------------|------|------|-----|------------|-------------|--------------|------|-----------|-----------|-------------------------------------------------------------------------------------------|
| CCG024583.1 | 654  | 775  | 138 | 50.9197925 | 7.376517117 | -2.78721484  | Down | 3.69E-139 | 2.07E-138 | AAEL006268-PA OS=Aedes aegypti GN=AAEL006268 PE=4 SV=1                                    |
| CCG007516.1 | 324  | 4901 | 138 | 649.983547 | 14.8896364  | -5.448022771 | Down | 0         | 0         | Probable GGY family antimicrobial peptide OS=Aedes aegypti PE=4 SV=1                      |
| CCG021578.1 | 948  | 3    | 139 | 0.13598017 | 5.125738894 | 5.236291776  | Up   | 5.28E-05  | 8.84E-05  | AAEL008256-PA OS=Aedes aegypti GN=AAEL008256 PE=3 SV=1                                    |
| CCG016490.1 | 1056 | 5    | 139 | 0.20345518 | 4.601515598 | 4.499326182  | Up   | 1.59E-05  | 2.76E-05  | Putative uncharacterized protein OS=Culex quinquefasciatus GN=CpipJ_CPIJ017323 PE=4 SV=1  |
| CCG008019.1 | 744  | 5    | 139 | 0.2887751  | 6.531183429 | 4.499326182  | Up   | 1.59E-05  | 2.76E-05  | -                                                                                         |
| CCG013312.1 | 1050 | 6    | 139 | 0.24554134 | 4.627809973 | 4.236291776  | Up   | 8.38E-06  | 1.47E-05  | -                                                                                         |
| CCG023189.1 | 2167 | 16   | 139 | 0.31726615 | 2.242362931 | 2.821254277  | Up   | 7.09E-09  | 1.42E-08  | Putative uncharacterized protein (Fragment) OS=Solenopsis invicta GN=SINV_08943 PE=4 SV=1 |
| CCG010959.1 | 462  | 17   | 139 | 1.58113742 | 10.51774994 | 2.733791435  | Up   | 3.39E-09  | 6.88E-09  | AAEL011749-PA OS=Aedes aegypti GN=AAEL011749 PE=4 SV=1                                    |
| CCG027190.1 | 950  | 19   | 139 | 0.85939469 | 5.114947865 | 2.573326763  | Up   | 7.73E-10  | 1.61E-09  | AAEL014899-PA OS=Aedes aegypti GN=AAEL014899 PE=3 SV=1                                    |
| CCG013088.1 | 1398 | 40   | 139 | 1.22946308 | 3.475822941 | 1.499326182  | Up   | 4.22E-10  | 8.81E-10  | AAEL004316-PA OS=Aedes aegypti GN=AAEL004316 PE=4 SV=1                                    |
| CCG003197.1 | 1387 | 45   | 139 | 1.3941154  | 3.503388948 | 1.32940118   | Up   | 1.15E-08  | 2.29E-08  | AAEL005050-PA OS=Aedes aegypti GN=AAEL005050 PE=4 SV=1                                    |
| CCG010257.1 | 582  | 46   | 139 | 3.39623332 | 8.349141703 | 1.29769232   | Up   | 2.11E-08  | 4.16E-08  | AAEL002910-PA OS=Aedes aegypti GN=AAEL002910 PE=4 SV=1                                    |
| CCG008807.1 | 1419 | 315  | 139 | 9.53873601 | 3.424383701 | -1.477953742 | Down | 5.83E-26  | 2.39E-25  | AAEL015239-PA (Fragment) OS=Aedes aegypti GN=AAEL015239 PE=4 SV=1                         |
| CCG001337.1 | 1218 | 340  | 139 | 11.9948356 | 3.989491356 | -1.58813666  | Down | 7.45E-31  | 3.16E-30  | AAEL005531-PA OS=Aedes aegypti GN=AAEL005531 PE=4 SV=1                                    |
| CCG006874.1 | 1619 | 436  | 139 | 11.5718371 | 3.001359155 | -1.946930048 | Down | 1.51E-51  | 7.08E-51  | AAEL013730-PA OS=Aedes aegypti GN=AAEL013730 PE=4 SV=1                                    |
| CCG003708.1 | 2613 | 659  | 139 | 10.8369901 | 1.859625133 | -2.542880378 | Down | 3.97E-107 | 2.13E-106 | AAEL000334-PA OS=Aedes aegypti GN=AAEL000334 PE=4 SV=1                                    |
| CCG014717.1 | 708  | 12   | 140 | 0.72830059 | 6.912653599 | 3.24663372   | Up   | 1.30E-07  | 2.49E-07  | -                                                                                         |

|             |      |     |     |            |             |              |      |           |           |                                                                                                             |
|-------------|------|-----|-----|------------|-------------|--------------|------|-----------|-----------|-------------------------------------------------------------------------------------------------------------|
| CCG023502.1 | 1299 | 16  | 140 | 0.5292654  | 3.76763568  | 2.831596221  | Up   | 7.09E-09  | 1.42E-08  | AAEL010782-PA OS=Aedes aegypti GN=AAEL010782 PE=3 SV=1                                                      |
| CCG022896.1 | 982  | 24  | 140 | 1.05017681 | 4.983868379 | 2.24663372   | Up   | 1.93E-11  | 4.23E-11  | AAEL003567-PA (Fragment) OS=Aedes aegypti GN=AAEL003567 PE=4 SV=1                                           |
| CCG001573.1 | 722  | 30  | 140 | 1.78544604 | 6.778613225 | 1.924705625  | Up   | 4.55E-13  | 1.19E-12  | AAEL001382-PA OS=Aedes aegypti GN=AAEL001382 PE=4 SV=1                                                      |
| CCG016651.1 | 825  | 37  | 140 | 1.92712749 | 5.932313634 | 1.622142855  | Up   | 3.24E-11  | 7.02E-11  | Mitochondrial 2-oxoglutarate/malate carrier protein OS=Culex quinquefasciatus GN=CpipJ_CPIJ016780 PE=3 SV=1 |
| CCG010932.1 | 1318 | 56  | 140 | 1.82572469 | 3.713322267 | 1.024241299  | Up   | 3.17E-06  | 5.70E-06  | AAEL008250-PA OS=Aedes aegypti GN=AAEL008250 PE=4 SV=1                                                      |
| CCG010395.3 | 1731 | 255 | 140 | 6.33003023 | 2.827359184 | -1.162757216 | Down | 3.76E-15  | 1.36E-14  | AGAP007868-PA OS=Anopheles gambiae GN=AGAP007868 PE=4 SV=2                                                  |
| CCG014782.1 | 638  | 531 | 140 | 35.7632117 | 7.671095216 | -2.22097183  | Down | 8.43E-74  | 4.22E-73  | AAEL008307-PA OS=Aedes aegypti GN=AAEL008307 PE=4 SV=1                                                      |
| CCG015405.1 | 2157 | 563 | 140 | 11.2155589 | 2.268965576 | -2.305394891 | Down | 8.69E-82  | 4.43E-81  | AAEL005397-PA OS=Aedes aegypti GN=AAEL005397 PE=4 SV=1                                                      |
| CCG005452.1 | 972  | 719 | 140 | 31.7852255 | 5.035142745 | -2.65825174  | Down | 1.04E-122 | 5.69E-122 | AAEL001184-PA OS=Aedes aegypti GN=AAEL001184 PE=4 SV=1                                                      |
| CCG019323.1 | 1107 | 777 | 140 | 30.1603286 | 4.421100947 | -2.770174568 | Down | 1.36E-138 | 7.62E-138 | Prophenoloxidase activator OS=Aedes aegypti PE=2 SV=1                                                       |
| CCG010197.1 | 318  | 0   | 141 | 0.001      | 15.500368   | 13.92001485  | Up   | 4.44E-16  | 1.63E-15  | AAEL012697-PA OS=Aedes aegypti GN=AAEL012697 PE=4 SV=1                                                      |
| CCG023733.1 | 729  | 8   | 141 | 0.47154716 | 6.7614774   | 3.841864556  | Up   | 2.19E-06  | 3.96E-06  | AAEL014795-PA OS=Aedes aegypti GN=AAEL014795 PE=4 SV=1                                                      |
| CCG004962.1 | 1909 | 8   | 141 | 0.18007222 | 2.582041396 | 3.841864556  | Up   | 2.19E-06  | 3.96E-06  | AAEL010940-PA OS=Aedes aegypti GN=CYP314A1 PE=3 SV=2                                                        |
| CCG011369.1 | 1239 | 17  | 141 | 0.58957667 | 3.978302684 | 2.754401715  | Up   | 3.39E-09  | 6.88E-09  | AAEL005888-PA OS=Aedes aegypti GN=AAEL005888 PE=4 SV=1                                                      |
| CCG011801.1 | 691  | 21  | 141 | 1.30588195 | 7.133309732 | 2.449547133  | Up   | 1.76E-10  | 3.73E-10  | AAEL008656-PA OS=Aedes aegypti GN=AAEL008656 PE=4 SV=1                                                      |

|             |      |      |     |            |             |              |      |          |          |                                                                                             |
|-------------|------|------|-----|------------|-------------|--------------|------|----------|----------|---------------------------------------------------------------------------------------------|
| CCG010801.1 | 1449 | 51   | 141 | 1.51239232 | 3.401737077 | 1.169439214  | Up   | 1.96E-07 | 3.72E-07 | AAEL013796-PA OS=Aedes aegypti GN=AAEL013796 PE=4 SV=1                                      |
| CCG027511.1 | 915  | 253  | 141 | 11.881249  | 5.387013142 | -1.141129018 | Down | 1.22E-14 | 4.35E-14 | AAEL005088-PA OS=Aedes aegypti GN=AAEL005088 PE=4 SV=1                                      |
| CCG018666.1 | 2055 | 330  | 141 | 6.90024935 | 2.398597092 | -1.524457658 | Down | 2.49E-28 | 1.04E-27 | Ca-activated cation channel protein OS=Culex quinquefasciatus GN=CpipJ_CPIJ009092 PE=4 SV=1 |
| CCG019418.1 | 252  | 341  | 141 | 58.1455536 | 19.55998819 | -1.571763373 | Down | 1.70E-30 | 7.17E-30 | AAEL012879-PA OS=Aedes aegypti GN=AAEL012879 PE=4 SV=1                                      |
| CCG021560.1 | 1551 | 472  | 141 | 13.0765408 | 3.178025161 | -2.040778493 | Down | 3.67E-59 | 1.76E-58 | AAEL004951-PA OS=Aedes aegypti GN=AAEL004951 PE=4 SV=1                                      |
| CCG004602.1 | 1779 | 2158 | 141 | 52.1240513 | 2.770723454 | -4.233614593 | Down | 0        | 0        | AAEL004341-PA (Fragment) OS=Aedes aegypti GN=AAEL004341 PE=4 SV=1                           |
| CCG013631.1 | 1731 | 6    | 142 | 0.14894189 | 2.86775003  | 4.267097823  | Up   | 8.38E-06 | 1.47E-05 | Putative uncharacterized protein OS=Tribolium castaneum GN=TcasGA2_TC001426 PE=4 SV=1       |
| CCG021642.1 | 638  | 16   | 142 | 1.0776109  | 7.780682291 | 2.852060323  | Up   | 7.09E-09 | 1.42E-08 | -                                                                                           |
| CCG013825.1 | 1494 | 21   | 142 | 0.60399225 | 3.322674231 | 2.459742901  | Up   | 1.76E-10 | 3.72E-10 | AAEL002819-PA OS=Aedes aegypti GN=AAEL002819 PE=4 SV=1                                      |
| CCG007279.1 | 785  | 35   | 142 | 1.91584804 | 6.323662805 | 1.722777306  | Up   | 3.17E-12 | 7.41E-12 | -                                                                                           |
| CCG000448.1 | 2022 | 41   | 142 | 0.87129531 | 2.455032296 | 1.494508319  | Up   | 3.01E-10 | 6.32E-10 | AAEL002186-PA OS=Aedes aegypti GN=AAEL002186 PE=4 SV=1                                      |
| CCG011755.1 | 876  | 41   | 142 | 2.01114055 | 5.666752627 | 1.494508319  | Up   | 3.01E-10 | 6.32E-10 | AAEL008243-PA OS=Aedes aegypti GN=AAEL008243 PE=4 SV=1                                      |
| CCG025706.1 | 549  | 42   | 142 | 3.2873021  | 9.042031515 | 1.459742901  | Up   | 6.02E-10 | 1.25E-09 | AAEL013591-PA OS=Aedes aegypti GN=AAEL013591 PE=4 SV=1                                      |
| CCG021442.1 | 168  | 44   | 142 | 11.2539781 | 29.54806727 | 1.392628705  | Up   | 2.29E-09 | 4.67E-09 | AAEL003534-PA OS=Aedes aegypti GN=AAEL003534 PE=4 SV=1                                      |
| CCG002766.1 | 5112 | 50   | 142 | 0.42028301 | 0.971063244 | 1.208204134  | Up   | 8.44E-08 | 1.62E-07 | AAEL012505-PA OS=Aedes aegypti GN=AAEL012505 PE=4 SV=1                                      |
| CCG012422.1 | 628  | 55   | 142 | 3.76327294 | 7.904578506 | 1.07070061   | Up   | 1.14E-06 | 2.10E-06 | -                                                                                           |
| CCG024327.1 | 549  | 278  | 142 | 21.7588091 | 9.042031515 | -1.266880749 | Down | 1.49E-18 | 5.75E-18 | AAEL008179-PA OS=Aedes aegypti GN=AAEL008179 PE=2 SV=1                                      |

|             |      |     |     |            |             |              |      |          |          |                                                                                          |
|-------------|------|-----|-----|------------|-------------|--------------|------|----------|----------|------------------------------------------------------------------------------------------|
| CCG019230.1 | 1556 | 283 | 142 | 7.81518952 | 3.190279757 | -1.29259792  | Down | 2.06E-19 | 7.99E-19 | AAEL001757-PA OS=Aedes aegypti GN=AAEL001757 PE=4 SV=1                                   |
| CCG019119.2 | 2814 | 292 | 142 | 4.45883529 | 1.764063718 | -1.337764236 | Down | 5.43E-21 | 2.14E-20 | AAEL002172-PA OS=Aedes aegypti GN=AAEL002172 PE=4 SV=1                                   |
| CCG027056.1 | 3915 | 357 | 142 | 3.91831296 | 1.26796304  | -1.627719941 | Down | 1.94E-33 | 8.34E-33 | AAEL014591-PA OS=Aedes aegypti GN=AAEL014591 PE=4 SV=1                                   |
| CCG020958.1 | 1074 | 373 | 142 | 14.9233808 | 4.622044043 | -1.690971497 | Down | 9.68E-37 | 4.24E-36 | AAEL008164-PA OS=Aedes aegypti GN=AAEL008164 PE=4 SV=1                                   |
| CCG000543.1 | 1282 | 386 | 142 | 12.9378452 | 3.872133621 | -1.740396714 | Down | 1.75E-39 | 7.77E-39 | Putative uncharacterized protein OS=Culex quinquefasciatus GN=CpipJ_CPIJ005513 PE=4 SV=1 |
| CCG027827.1 | 519  | 506 | 142 | 41.8934214 | 9.564692296 | -2.130933251 | Down | 7.14E-67 | 3.51E-66 | AAEL017144-PA OS=Aedes aegypti PE=4 SV=1                                                 |
| CCG015322.1 | 294  | 0   | 143 | 0.001      | 17.00351557 | 14.05354544  | Up   | 4.44E-16 | 1.63E-15 | AAEL013570-PA OS=Aedes aegypti GN=AAEL013570 PE=4 SV=1                                   |
| CCG000908.1 | 513  | 9   | 143 | 0.75385499 | 9.744704831 | 3.692259539  | Up   | 1.09E-06 | 2.01E-06 | AAEL004861-PA OS=Aedes aegypti GN=AAEL004861 PE=4 SV=1                                   |
| CCG001303.1 | 1482 | 14  | 143 | 0.40592192 | 3.373167057 | 3.054829619  | Up   | 3.07E-08 | 6.01E-08 | AAEL014400-PA OS=Aedes aegypti GN=AAEL014400 PE=4 SV=1                                   |
| CCG009406.1 | 798  | 15  | 143 | 0.80770178 | 6.264453106 | 2.955293945  | Up   | 1.48E-08 | 2.93E-08 | AAEL002310-PA OS=Aedes aegypti GN=AAEL002310 PE=4 SV=1                                   |
| CCG011366.1 | 3423 | 16  | 143 | 0.20085181 | 1.46042465  | 2.862184541  | Up   | 7.09E-09 | 1.42E-08 | AAEL005888-PA OS=Aedes aegypti GN=AAEL005888 PE=4 SV=1                                   |
| CCG026988.1 | 1661 | 20  | 143 | 0.51739596 | 3.009652967 | 2.540256446  | Up   | 3.69E-10 | 7.71E-10 | AAEL010362-PA OS=Aedes aegypti GN=AAEL010362 PE=4 SV=1                                   |
| CCG009133.1 | 531  | 31  | 143 | 2.50859091 | 9.414375854 | 1.90798823   | Up   | 3.03E-13 | 8.37E-13 | AAEL005626-PA OS=Aedes aegypti GN=AAEL005626 PE=4 SV=1                                   |
| CCG011851.1 | 823  | 32  | 143 | 1.67075517 | 6.074159877 | 1.862184541  | Up   | 3.35E-13 | 9.12E-13 | -                                                                                        |
| CCG014676.1 | 662  | 48  | 143 | 3.1156303  | 7.551410239 | 1.27722204   | Up   | 1.97E-08 | 3.89E-08 | AAEL010795-PA OS=Aedes aegypti GN=AAEL010795 PE=4 SV=1                                   |
| CCG010627.1 | 312  | 48  | 143 | 6.6107284  | 16.02254352 | 1.27722204   | Up   | 1.97E-08 | 3.89E-08 | AAEL002008-PA (Fragment) OS=Aedes aegypti GN=AAEL002008 PE=4 SV=1                        |
| CCG006803.1 | 1347 | 462 | 143 | 14.7379491 | 3.711235025 | -1.989564501 | Down | 4.45E-56 | 2.12E-55 | AAEL012248-PA OS=Aedes aegypti GN=AAEL012248 PE=3 SV=1                                   |

|             |      |      |     |            |             |              |      |           |           |                                                                              |
|-------------|------|------|-----|------------|-------------|--------------|------|-----------|-----------|------------------------------------------------------------------------------|
| CCG024666.1 | 756  | 11   | 144 | 0.62522101 | 6.658719385 | 3.412806587  | Up   | 2.67E-07  | 5.03E-07  | Uncharacterized protein OS=Anopheles darlingi GN=AND_05262 PE=4 SV=1         |
| CCG023148.1 | 1899 | 31   | 144 | 0.70145433 | 2.650864589 | 1.918041895  | Up   | 2.82E-13  | 7.84E-13  | AAEL003366-PA OS=Aedes aegypti GN=AAEL003366 PE=4 SV=1                       |
| CCG009036.1 | 1146 | 36   | 144 | 1.3498346  | 4.39266305  | 1.702313204  | Up   | 3.37E-12  | 7.85E-12  | -                                                                            |
| CCG001219.2 | 1230 | 39   | 144 | 1.362455   | 4.092676305 | 1.586835986  | Up   | 3.47E-11  | 7.52E-11  | AAEL004974-PA OS=Aedes aegypti GN=AAEL004974 PE=4 SV=1                       |
| CCG001699.1 | 966  | 54   | 144 | 2.40203485 | 5.211171693 | 1.117350703  | Up   | 3.96E-07  | 7.41E-07  | AAEL003202-PA OS=Aedes aegypti GN=AAEL003202 PE=4 SV=1                       |
| CCG023239.1 | 756  | 56   | 144 | 3.1829433  | 6.658719385 | 1.064883283  | Up   | 1.07E-06  | 1.97E-06  | AAEL012822-PA OS=Aedes aegypti GN=AAEL012822 PE=4 SV=1                       |
| CCG012991.1 | 3387 | 289  | 144 | 3.66644621 | 1.486268632 | -1.302687477 | Down | 5.16E-20  | 2.01E-19  | AAEL004961-PA OS=Aedes aegypti GN=AAEL004961 PE=4 SV=1                       |
| CCG011789.1 | 1302 | 334  | 144 | 11.022958  | 3.866353191 | -1.511466087 | Down | 2.60E-28  | 1.08E-27  | AAEL013637-PA OS=Aedes aegypti GN=AAEL013637 PE=4 SV=1                       |
| CCG021319.1 | 1389 | 580  | 144 | 17.9427258 | 3.624184201 | -2.307670885 | Down | 2.65E-84  | 1.35E-83  | Ammonium transporter OS=Aedes albopictus PE=2 SV=1                           |
| CCG009039.1 | 381  | 1166 | 144 | 131.503177 | 13.21257705 | -3.315113868 | Down | 3.04E-248 | 1.87E-247 | AAEL002920-PA OS=Aedes aegypti GN=AAEL002920 PE=4 SV=1                       |
| CCG020603.1 | 2229 | 21   | 145 | 0.40482926 | 2.27409158  | 2.489904871  | Up   | 1.76E-10  | 3.73E-10  | Zinc finger protein OS=Culex quinquefasciatus GN=CpipJ_CPIJ012788 PE=4 SV=1  |
| CCG001296.1 | 903  | 28   | 145 | 1.33239487 | 5.613455296 | 2.074867372  | Up   | 1.17E-12  | 2.85E-12  | AAEL004611-PA OS=Aedes aegypti GN=AAEL004611 PE=4 SV=1                       |
| CCG005690.1 | 984  | 36   | 145 | 1.57206346 | 5.151372085 | 1.712297292  | Up   | 2.33E-12  | 5.50E-12  | AAEL009589-PA OS=Aedes aegypti GN=AAEL009589 PE=4 SV=1                       |
| CCG003142.1 | 470  | 50   | 145 | 4.57124836 | 10.78500028 | 1.238366104  | Up   | 3.39E-08  | 6.64E-08  | DNA-directed RNA polymerase subunit OS=Aedes aegypti GN=AAEL010468 PE=3 SV=1 |
| CCG012560.1 | 1626 | 247  | 145 | 6.52738281 | 3.117435506 | -1.066144938 | Down | 5.54E-13  | 1.42E-12  | AAEL011699-PA OS=Aedes aegypti GN=AAEL011699 PE=4 SV=1                       |
| CCG026823.1 | 1254 | 279  | 145 | 9.56025196 | 4.042224986 | -1.241899018 | Down | 4.38E-18  | 1.67E-17  | AGAP007334-PA OS=Anopheles gambiae GN=AGAP007334 PE=4 SV=3                   |

|             |       |     |     |            |             |              |      |          |            |                                                                                        |
|-------------|-------|-----|-----|------------|-------------|--------------|------|----------|------------|----------------------------------------------------------------------------------------|
| CCG013954.1 | 7323  | 409 | 145 | 2.399921   | 0.692195839 | -1.793734739 | Down | 1.78E-43 | 8.05E-43   | AAEL011854-PA OS=Aedes aegypti GN=AAEL011854 PE=4 SV=1                                 |
| CCG006920.1 | 474   | 2   | 146 | 0.1813069  | 10.76773926 | 5.892137763  | Up   | 9.36E-05 | 0.00015354 | AAEL004436-PA OS=Aedes aegypti GN=AAEL004436 PE=4 SV=1                                 |
| CCG017130.1 | 413   | 3   | 146 | 0.31212882 | 12.35813174 | 5.307175262  | Up   | 5.28E-05 | 8.83E-05   | -                                                                                      |
| CCG028032.1 | 1797  | 8   | 146 | 0.19129542 | 2.840238402 | 3.892137763  | Up   | 2.19E-06 | 3.97E-06   | AAEL000452-PA OS=Aedes aegypti GN=AAEL000452 PE=4 SV=1                                 |
| CCG021284.1 | 1617  | 11  | 146 | 0.29231112 | 3.156405942 | 3.432706144  | Up   | 2.67E-07 | 5.03E-07   | AAEL011013-PA OS=Aedes aegypti GN=AAEL011013 PE=4 SV=1                                 |
| CCG000777.1 | 1173  | 15  | 146 | 0.5494851  | 4.351158064 | 2.985247167  | Up   | 1.48E-08 | 2.93E-08   | AAEL000550-PA OS=Aedes aegypti GN=AAEL000550 PE=4 SV=1                                 |
| CCG021747.1 | 1721  | 16  | 146 | 0.3994862  | 2.965664386 | 2.892137763  | Up   | 7.09E-09 | 1.42E-08   | Uncharacterized protein OS=Anopheles darlingi GN=AND_00142 PE=4 SV=1                   |
| CCG015718.1 | 263   | 24  | 146 | 3.92119251 | 19.40649585 | 2.307175262  | Up   | 1.93E-11 | 4.23E-11   | -                                                                                      |
| CCG019355.1 | 399   | 25  | 146 | 2.69233926 | 12.7917504  | 2.248281573  | Up   | 9.32E-12 | 2.08E-11   | AAEL013782-PA OS=Aedes aegypti GN=AAEL013782 PE=4 SV=1                                 |
| CCG015177.1 | 1073  | 27  | 146 | 1.08125148 | 4.756671397 | 2.137250261  | Up   | 2.28E-12 | 5.40E-12   | Pol polyprotein OS=Drosophila melanogaster GN=pol PE=4 SV=1                            |
| CCG007329.1 | 2001  | 34  | 146 | 0.73012043 | 2.550678865 | 1.804674921  | Up   | 3.73E-13 | 9.98E-13   | AAEL000033-PA OS=Aedes aegypti GN=AAEL000033 PE=4 SV=1                                 |
| CCG020718.1 | 2363  | 38  | 146 | 0.69100716 | 2.159927384 | 1.644210249  | Up   | 7.78E-12 | 1.74E-11   | AAEL003153-PA OS=Aedes aegypti GN=AAEL003153 PE=4 SV=1                                 |
| CCG009890.1 | 1014  | 50  | 146 | 2.11882321 | 5.033440245 | 1.248281573  | Up   | 2.50E-08 | 4.91E-08   | AAEL005203-PA OS=Aedes aegypti GN=AAEL005203 PE=4 SV=1                                 |
| CCG002907.1 | 986   | 51  | 146 | 2.22257248 | 5.176377697 | 1.219712421  | Up   | 4.41E-08 | 8.58E-08   | AAEL007974-PA OS=Aedes aegypti GN=AAEL007974 PE=4 SV=1                                 |
| CCG026370.1 | 558   | 55  | 146 | 4.23536811 | 9.146789263 | 1.110778049  | Up   | 3.73E-07 | 6.99E-07   | AAEL014183-PA OS=Aedes aegypti GN=AAEL014183 PE=4 SV=1                                 |
| CCG006624.1 | 1531  | 56  | 146 | 1.57172119 | 3.333708954 | 1.084782841  | Up   | 6.15E-07 | 1.14E-06   | Putative uncharacterized protein OS=Caenorhabditis brenneri GN=CAEBREN_31323 PE=4 SV=1 |
| CCG008198.1 | 19131 | 266 | 146 | 0.59745698 | 0.26678733  | -1.163144673 | Down | 9.53E-16 | 3.47E-15   | Uncharacterized protein OS=Anopheles darlingi GN=AND_22381 PE=4 SV=1                   |

|             |      |      |     |            |             |              |      |          |            |                                                                                                  |
|-------------|------|------|-----|------------|-------------|--------------|------|----------|------------|--------------------------------------------------------------------------------------------------|
| CCG018574.1 | 1366 | 571  | 146 | 17.9617265 | 3.736389758 | -2.265209173 | Down | 3.61E-81 | 1.84E-80   | Out at first protein (Fragment)<br>OS=Culex quinquefasciatus<br>GN=CpipJ_CPIJ020077 PE=4<br>SV=1 |
| CCG000290.1 | 606  | 0    | 147 | 0.001      | 8.479978029 | 13.04984481  | Up   | 4.44E-16 | 1.65E-15   | AAEL010818-PA OS=Aedes<br>aegypti GN=AAEL010818 PE=3<br>SV=1                                     |
| CCG015710.1 | 297  | 2    | 147 | 0.28935848 | 17.30258143 | 5.901985549  | Up   | 9.36E-05 | 0.00015407 | AAEL007013-PA OS=Aedes<br>aegypti GN=AAEL007013 PE=4<br>SV=1                                     |
| CCG025417.1 | 615  | 7    | 147 | 0.48908641 | 8.355880789 | 4.094630627  | Up   | 4.31E-06 | 7.70E-06   | -                                                                                                |
| CCG003369.1 | 1356 | 10   | 147 | 0.31688595 | 3.789724694 | 3.580057454  | Up   | 5.43E-07 | 1.01E-06   | AAEL001732-PA OS=Aedes<br>aegypti GN=AAEL001732 PE=4<br>SV=1                                     |
| CCG009001.1 | 1557 | 20   | 147 | 0.55195549 | 3.300492412 | 2.580057454  | Up   | 3.69E-10 | 7.73E-10   | Uncharacterized protein<br>OS=Anopheles darlingi<br>GN=AND_17136 PE=4 SV=1                       |
| CCG016264.1 | 301  | 22   | 147 | 3.14064505 | 17.0726468  | 2.44255393   | Up   | 8.38E-11 | 1.80E-10   | AAEL006177-PA OS=Aedes<br>aegypti GN=AAEL006177 PE=4<br>SV=1                                     |
| CCG026951.1 | 1989 | 50   | 147 | 1.08018438 | 2.583643381 | 1.258129359  | Up   | 1.83E-08 | 3.62E-08   | AAEL005053-PA OS=Aedes<br>aegypti GN=AAEL005053 PE=4<br>SV=1                                     |
| CCG001787.1 | 447  | 50   | 147 | 4.80645801 | 11.49634605 | 1.258129359  | Up   | 1.83E-08 | 3.62E-08   | AAEL009459-PA OS=Aedes<br>aegypti GN=AAEL009459 PE=4<br>SV=1                                     |
| CCG018511.1 | 1667 | 51   | 147 | 1.31461096 | 3.082703471 | 1.229560207  | Up   | 3.25E-08 | 6.36E-08   | -                                                                                                |
| CCG024619.1 | 2168 | 276  | 147 | 5.47031677 | 2.370325962 | -1.206538908 | Down | 3.57E-17 | 1.35E-16   | AAEL009038-PA (Fragment)<br>OS=Aedes aegypti<br>GN=AAEL009038 PE=4 SV=1                          |
| CCG023336.1 | 876  | 307  | 147 | 15.059028  | 5.866286171 | -1.360109297 | Down | 1.61E-22 | 6.42E-22   | AAEL002935-PA OS=Aedes<br>aegypti GN=AAEL002935 PE=4<br>SV=1                                     |
| CCG028363.1 | 1827 | 388  | 147 | 9.12548277 | 2.812734913 | -1.697927294 | Down | 2.29E-38 | 1.02E-37   | AAEL008940-PA OS=Aedes<br>aegypti GN=AAEL008940 PE=4<br>SV=1                                     |
| CCG008089.1 | 1876 | 412  | 147 | 9.43685003 | 2.739267956 | -1.784514979 | Down | 1.76E-43 | 7.99E-43   | AAEL006707-PA (Fragment)<br>OS=Aedes aegypti<br>GN=AAEL006707 PE=4 SV=1                          |
| CCG015347.1 | 2166 | 464  | 147 | 9.20496623 | 2.372514629 | -1.955995446 | Down | 4.42E-55 | 2.10E-54   | AAEL000474-PA OS=Aedes<br>aegypti GN=AAEL000474 PE=4<br>SV=1                                     |
| CCG012608.1 | 1911 | 5274 | 147 | 118.588373 | 2.689098213 | -5.462696307 | Down | 0        | 0          | AAEL009910-PA OS=Aedes<br>aegypti GN=AAEL009910 PE=4<br>SV=1                                     |

|             |      |     |     |            |             |              |      |          |            |                                                                                          |
|-------------|------|-----|-----|------------|-------------|--------------|------|----------|------------|------------------------------------------------------------------------------------------|
| CCG015185.1 | 1449 | 4   | 148 | 0.11861901 | 3.570617641 | 4.911766569  | Up   | 2.95E-05 | 5.03E-05   | AAEL014397-PA OS=Aedes aegypti GN=AAEL014397 PE=4 SV=1                                   |
| CCG004487.1 | 834  | 17  | 148 | 0.87588188 | 6.203627053 | 2.824303728  | Up   | 3.39E-09 | 6.89E-09   | AAEL011589-PA OS=Aedes aegypti GN=AAEL011589 PE=4 SV=1                                   |
| CCG007903.1 | 539  | 44  | 148 | 3.50773344 | 9.59893314  | 1.452334951  | Up   | 3.04E-10 | 6.38E-10   | Uncharacterized protein OS=Anopheles darlingi GN=AND_08991 PE=4 SV=1                     |
| CCG006114.1 | 878  | 52  | 148 | 2.54490456 | 5.892739137 | 1.211326851  | Up   | 4.21E-08 | 8.21E-08   | AAEL002303-PA OS=Aedes aegypti GN=AAEL002303 PE=4 SV=1                                   |
| CCG020633.1 | 234  | 60  | 148 | 11.0178807 | 22.11036309 | 1.004875974  | Up   | 2.39E-06 | 4.31E-06   | Myosin heavy chain OS=Culex quinquefasciatus GN=CpipJ_CPIJ015897 PE=4 SV=1               |
| CCG015284.1 | 321  | 263 | 148 | 35.2057327 | 16.11783477 | -1.12715242  | Down | 6.86E-15 | 2.47E-14   | Actinin OS=Culex quinquefasciatus GN=CpipJ_CPIJ003874 PE=4 SV=1                          |
| CCG024878.1 | 2529 | 271 | 148 | 4.60450695 | 2.04579872  | -1.170382472 | Down | 3.68E-16 | 1.38E-15   | AAEL011941-PA OS=Aedes aegypti GN=AAEL011941 PE=4 SV=1                                   |
| CCG021564.1 | 482  | 368 | 148 | 32.8067683 | 10.73407669 | -1.611795387 | Down | 5.96E-34 | 2.57E-33   | AAEL011100-PA OS=Aedes aegypti GN=AAEL011100 PE=4 SV=1                                   |
| CCG000106.1 | 618  | 480 | 148 | 33.3745512 | 8.371885052 | -1.995124026 | Down | 2.09E-58 | 1.00E-57   | AAEL009032-PA OS=Aedes aegypti GN=AAEL009032 PE=4 SV=1                                   |
| CCG015673.1 | 3660 | 527 | 148 | 6.18717217 | 1.413613378 | -2.129892582 | Down | 1.56E-69 | 7.74E-69   | AAEL001442-PA OS=Aedes aegypti GN=AAEL001442 PE=4 SV=1                                   |
| CCG014082.1 | 1114 | 2   | 149 | 0.07714495 | 4.67574797  | 5.921481724  | Up   | 9.36E-05 | 0.00015355 | AAEL004775-PA OS=Aedes aegypti GN=AAEL004775 PE=4 SV=1                                   |
| CCG023397.2 | 1128 | 13  | 149 | 0.49521857 | 4.617715637 | 3.221042006  | Up   | 6.34E-08 | 1.23E-07   | Putative uncharacterized protein OS=Culex quinquefasciatus GN=CpipJ_CPIJ015361 PE=4 SV=1 |
| CCG012349.1 | 507  | 31  | 149 | 2.62734078 | 10.2737342  | 1.967285414  | Up   | 2.45E-13 | 6.90E-13   | AAEL000463-PA OS=Aedes aegypti GN=AAEL000463 PE=4 SV=1                                   |
| CCG016727.1 | 1734 | 32  | 149 | 0.79298241 | 3.003911903 | 1.921481724  | Up   | 1.91E-13 | 5.50E-13   | AAEL001004-PA OS=Aedes aegypti GN=AAEL001004 PE=4 SV=1                                   |
| CCG023585.1 | 3601 | 37  | 149 | 0.44151074 | 1.446482432 | 1.712028359  | Up   | 1.18E-12 | 2.89E-12   | -                                                                                        |
| CCG027014.1 | 2244 | 44  | 149 | 0.84254382 | 2.321204652 | 1.462050106  | Up   | 2.16E-10 | 4.56E-10   | AAEL007644-PA (Fragment) OS=Aedes aegypti GN=GPRNNA6 PE=3 SV=2                           |



|             |      |     |     |            |             |              |      |           |           |                                                                               |
|-------------|------|-----|-----|------------|-------------|--------------|------|-----------|-----------|-------------------------------------------------------------------------------|
| CCG005990.1 | 659  | 46  | 149 | 2.99940484 | 7.904071683 | 1.397919768  | Up   | 8.22E-10  | 1.70E-09  | AAEL007825-PA OS=Aedes aegypti GN=AAEL007825 PE=4 SV=1                        |
| CCG004916.1 | 1296 | 59  | 149 | 1.95618391 | 4.01912287  | 1.038838675  | Up   | 1.15E-06  | 2.11E-06  | AAEL012138-PA OS=Aedes aegypti GN=AAEL012138 PE=4 SV=1                        |
| CCG022320.1 | 972  | 246 | 149 | 10.8750563 | 5.358830493 | -1.021032781 | Down | 3.79E-12  | 8.78E-12  | AAEL003894-PA OS=Aedes aegypti GN=GNBPB5 PE=4 SV=1                            |
| CCG016210.1 | 393  | 268 | 149 | 29.3025162 | 13.25390137 | -1.144607466 | Down | 1.73E-15  | 6.29E-15  | AAEL002608-PA OS=Aedes aegypti GN=AAEL002608 PE=4 SV=1                        |
| CCG006497.1 | 1725 | 328 | 149 | 8.17047707 | 3.019584486 | -1.43607028  | Down | 6.88E-26  | 2.82E-25  | AAEL002367-PA (Fragment) OS=Aedes aegypti GN=AAEL002367 PE=4 SV=1             |
| CCG007696.1 | 750  | 458 | 149 | 26.2401846 | 6.945044319 | -1.917722064 | Down | 5.32E-53  | 2.51E-52  | Steroid dehydrogenase OS=Culex quinquefasciatus GN=CpipJ_CPIJ007736 PE=3 SV=1 |
| CCG020243.1 | 1026 | 574 | 149 | 24.0395981 | 5.076786783 | -2.243425202 | Down | 1.26E-80  | 6.42E-80  | AAEL007060-PA OS=Aedes aegypti GN=AAEL007060 PE=3 SV=1                        |
| CCG005944.1 | 384  | 714 | 149 | 79.8968503 | 13.56453969 | -2.55829854  | Down | 1.02E-116 | 5.53E-116 | AAEL002860-PA OS=Aedes aegypti GN=AAEL002860 PE=4 SV=1                        |
| CCG003389.1 | 636  | 0   | 150 | 0.001      | 8.244876597 | 13.00928219  | Up   | 4.44E-16  | 1.63E-15  | AAEL010110-PA OS=Aedes aegypti GN=AAEL010110 PE=4 SV=1                        |
| CCG001048.1 | 1515 | 0   | 150 | 0.001      | 3.461215522 | 11.75706306  | Up   | 4.44E-16  | 1.63E-15  | Cytochrome P450 6CB1 (Fragment) OS=Aedes aegypti GN=CYP6CB1 PE=2 SV=1         |
| CCG020723.1 | 2793 | 0   | 150 | 0.001      | 1.877458473 | 10.87456528  | Up   | 4.44E-16  | 1.65E-15  | AAEL011258-PA OS=Aedes aegypti GN=AAEL011258 PE=4 SV=1                        |
| CCG016470.1 | 1245 | 26  | 150 | 0.89735992 | 4.211840575 | 2.230692176  | Up   | 4.60E-12  | 1.05E-11  | -                                                                             |
| CCG016241.3 | 1005 | 26  | 150 | 1.11165483 | 5.21765325  | 2.230692176  | Up   | 4.60E-12  | 1.05E-11  | -                                                                             |
| CCG020705.1 | 756  | 30  | 150 | 1.7051482  | 6.936166026 | 2.024241299  | Up   | 3.72E-13  | 9.96E-13  | AAEL012822-PA OS=Aedes aegypti GN=AAEL012822 PE=4 SV=1                        |
| CCG018991.1 | 1178 | 34  | 150 | 1.24021305 | 4.451393477 | 1.843669053  | Up   | 1.47E-13  | 4.39E-13  | AAEL004775-PA OS=Aedes aegypti GN=AAEL004775 PE=4 SV=1                        |
| CCG010340.1 | 947  | 42  | 150 | 1.90573269 | 5.53721385  | 1.538814472  | Up   | 3.72E-11  | 8.07E-11  | AAEL003847-PA OS=Aedes aegypti GN=AAEL003847 PE=4 SV=1                        |
| CCG009770.1 | 498  | 54  | 150 | 4.65936881 | 10.52960144 | 1.176244392  | Up   | 6.94E-08  | 1.34E-07  | AAEL006748-PA OS=Aedes aegypti GN=AAEL006748 PE=4 SV=1                        |

|             |      |     |     |            |             |              |      |          |          |                                                                                                            |
|-------------|------|-----|-----|------------|-------------|--------------|------|----------|----------|------------------------------------------------------------------------------------------------------------|
| CCG019470.1 | 393  | 256 | 150 | 27.9904633 | 13.34285373 | -1.068868106 | Down | 1.88E-13 | 5.44E-13 | AAEL014640-PA OS=Aedes aegypti GN=PGRPLC PE=4 SV=1                                                         |
| CCG023032.1 | 591  | 290 | 150 | 21.0849798 | 8.872659079 | -1.248777196 | Down | 6.89E-19 | 2.66E-18 | AAEL003730-PA OS=Aedes aegypti GN=AAEL003730 PE=4 SV=1                                                     |
| CCG020054.1 | 1320 | 427 | 150 | 13.9000581 | 3.972531451 | -1.806960365 | Down | 9.15E-46 | 4.19E-45 | AAEL007796-PA OS=Aedes aegypti GN=CLIPD1 PE=3 SV=1                                                         |
| CCG004535.1 | 1533 | 619 | 150 | 17.3504669 | 3.420575027 | -2.342663705 | Down | 1.69E-91 | 8.82E-91 | Adenylylurate kinase OS=Culex quinquefasciatus GN=CpipJ_CPIJ006069 PE=3 SV=1                               |
| CCG013978.1 | 1170 | 7   | 151 | 0.25708388 | 4.511709224 | 4.133363021  | Up   | 4.31E-06 | 7.69E-06 | AAEL010401-PA OS=Aedes aegypti GN=AAEL010401 PE=4 SV=1                                                     |
| CCG017823.1 | 1674 | 8   | 151 | 0.20535118 | 3.153345157 | 3.940717943  | Up   | 2.19E-06 | 3.97E-06 | AAEL009254-PA OS=Aedes aegypti GN=AAEL009254 PE=3 SV=1                                                     |
| CCG003333.1 | 521  | 9   | 151 | 0.74227948 | 10.13186141 | 3.770792942  | Up   | 1.09E-06 | 2.01E-06 | -                                                                                                          |
| CCG017780.1 | 885  | 10  | 151 | 0.48553372 | 5.964632534 | 3.618789848  | Up   | 5.43E-07 | 1.01E-06 | AAEL008915-PA OS=Aedes aegypti GN=AAEL008915 PE=4 SV=1                                                     |
| CCG012871.1 | 2863 | 35  | 151 | 0.52530238 | 1.843765209 | 1.811434926  | Up   | 1.61E-13 | 4.76E-13 | Retrovirus-related Pol polyprotein from transposon TNT 1-94 OS=Trichinella spiralis GN=Tsp_01017 PE=4 SV=1 |
| CCG027717.1 | 1626 | 37  | 151 | 0.97778609 | 3.246432837 | 1.731264578  | Up   | 5.82E-13 | 1.49E-12 | AAEL006795-PA OS=Aedes aegypti GN=CYP9J15 PE=3 SV=2                                                        |
| CCG000360.1 | 960  | 41  | 151 | 1.83516575 | 5.498645617 | 1.583165939  | Up   | 1.25E-11 | 2.78E-11 | AAEL009174-PA OS=Aedes aegypti GN=AAEL009174 PE=2 SV=1                                                     |
| CCG025669.1 | 1245 | 48  | 151 | 1.65666447 | 4.239919512 | 1.355755442  | Up   | 1.53E-09 | 3.15E-09 | Putative uncharacterized protein OS=Culex quinquefasciatus GN=CpipJ_CPIJ000155 PE=4 SV=1                   |
| CCG025732.1 | 1986 | 50  | 151 | 1.08181608 | 2.657955585 | 1.296861753  | Up   | 5.25E-09 | 1.06E-08 | AAEL004692-PA OS=Aedes aegypti GN=AAEL004692 PE=4 SV=1                                                     |
| CCG012009.1 | 3468 | 261 | 151 | 3.23388141 | 1.522116434 | -1.087188053 | Down | 4.97E-14 | 1.68E-13 | AAEL001304-PA OS=Aedes aegypti GN=AAEL001304 PE=3 SV=1                                                     |
| CCG007748.1 | 1221 | 285 | 151 | 10.0297906 | 4.323259453 | -1.214100166 | Down | 7.61E-18 | 2.90E-17 | AAEL000044-PA OS=Aedes aegypti GN=CYP325Q1 PE=3 SV=1                                                       |
| CCG011387.1 | 1824 | 346 | 151 | 8.15105711 | 2.894024009 | -1.493910284 | Down | 8.61E-29 | 3.60E-28 | AAEL014138-PA OS=Aedes aegypti GN=SRPN16 PE=3 SV=2                                                         |

|             |      |     |     |            |             |              |      |           |           |                                                                                     |
|-------------|------|-----|-----|------------|-------------|--------------|------|-----------|-----------|-------------------------------------------------------------------------------------|
| CCG008845.1 | 869  | 412 | 151 | 20.3723023 | 6.074453156 | -1.745782584 | Down | 3.30E-42  | 1.49E-41  | Fatty acid desaturase OS=Culex quinquefasciatus<br>GN=CpipJ_CPIJ004097 PE=4<br>SV=1 |
| CCG001744.1 | 1591 | 473 | 151 | 12.774786  | 3.317850278 | -1.94497843  | Down | 1.06E-55  | 5.03E-55  | AAEL004120-PA OS=Aedes aegypti GN=AAEL004120 PE=4<br>SV=1                           |
| CCG013624.1 | 468  | 561 | 151 | 51.5085921 | 11.27927306 | -2.191139017 | Down | 1.42E-76  | 7.13E-76  | AGAP012191-PA (Fragment)<br>OS=Anopheles gambiae<br>GN=AGAP012191 PE=4 SV=4         |
| CCG009368.1 | 1914 | 772 | 151 | 17.3315753 | 2.757941375 | -2.651739094 | Down | 2.92E-131 | 1.63E-130 | AAEL014527-PA OS=Aedes aegypti GN=AAEL014527 PE=4<br>SV=1                           |
| CCG005067.1 | 384  | 814 | 151 | 91.0868853 | 13.74661404 | -2.728167041 | Down | 1.03E-142 | 5.82E-142 | AAEL002860-PA OS=Aedes aegypti GN=AAEL002860 PE=4<br>SV=1                           |
| CCG000022.1 | 1560 | 13  | 152 | 0.35808112 | 3.40619107  | 3.249800999  | Up   | 6.34E-08  | 1.23E-07  | AAEL003543-PA OS=Aedes aegypti GN=AAEL003543 PE=4<br>SV=1                           |
| CCG004905.1 | 432  | 20  | 152 | 1.98933957 | 12.30013442 | 2.628312622  | Up   | 3.69E-10  | 7.71E-10  | AAEL000408-PA OS=Aedes aegypti GN=AAEL000408 PE=4<br>SV=1                           |
| CCG003805.1 | 477  | 28  | 152 | 2.52233243 | 11.13974438 | 2.142885795  | Up   | 1.17E-12  | 2.86E-12  | AAEL013273-PA OS=Aedes aegypti GN=AAEL013273 PE=4<br>SV=1                           |
| CCG027934.1 | 1257 | 49  | 152 | 1.67503341 | 4.227253834 | 1.335530873  | Up   | 2.07E-09  | 4.24E-09  | AAEL005618-PA OS=Aedes aegypti GN=AAEL005618 PE=4<br>SV=1                           |
| CCG000304.1 | 1977 | 51  | 152 | 1.1084757  | 2.687738022 | 1.277815375  | Up   | 6.95E-09  | 1.40E-08  | AAEL000305-PA OS=Aedes aegypti GN=AAEL000305 PE=4<br>SV=1                           |
| CCG004927.1 | 3660 | 60  | 152 | 0.70442188 | 1.451819145 | 1.043350122  | Up   | 8.20E-07  | 1.51E-06  | AAEL013736-PA (Fragment)<br>OS=Aedes aegypti<br>GN=AAEL013736 PE=4 SV=1             |
| CCG017513.1 | 1944 | 389 | 152 | 8.59836768 | 2.733363204 | -1.653385628 | Down | 4.43E-37  | 1.94E-36  | AAEL005160-PA OS=Aedes aegypti GN=AAEL005160 PE=4<br>SV=1                           |
| CCG013321.1 | 534  | 749 | 152 | 60.2702832 | 9.950670542 | -2.598581191 | Down | 1.53E-124 | 8.43E-124 | AAEL007659-PA OS=Aedes aegypti GN=AAEL007659 PE=4<br>SV=1                           |
| CCG008082.1 | 5973 | 771 | 152 | 5.54657046 | 0.889612936 | -2.640346333 | Down | 1.83E-130 | 1.02E-129 | AAEL000581-PA OS=Aedes aegypti GN=AAEL000581 PE=4<br>SV=1                           |
| CCG010696.1 | 363  | 808 | 152 | 95.646131  | 14.6381765  | -2.707970765 | Down | 1.59E-140 | 8.95E-140 | AAEL007184-PA OS=Aedes aegypti GN=AAEL007184 PE=4<br>SV=1                           |
| CCG011022.1 | 309  | 0   | 153 | 0.001      | 17.30943801 | 14.07927126  | Up   | 4.44E-16  | 1.65E-15  | AAEL013570-PA OS=Aedes aegypti GN=AAEL013570 PE=4<br>SV=1                           |

|             |      |     |     |            |             |              |      |           |            |                                                                                          |
|-------------|------|-----|-----|------------|-------------|--------------|------|-----------|------------|------------------------------------------------------------------------------------------|
| CCG004373.1 | 885  | 2   | 153 | 0.09710674 | 6.043634289 | 5.959701047  | Up   | 9.36E-05  | 0.00015367 | -                                                                                        |
| CCG026909.1 | 1095 | 15  | 153 | 0.5886265  | 4.884581138 | 3.052810451  | Up   | 1.48E-08  | 2.93E-08   | AGAP004623-PA OS=Anopheles gambiae GN=AgaP_AGAP004623 PE=4 SV=5                          |
| CCG011590.1 | 315  | 17  | 153 | 2.31900155 | 16.97973443 | 2.872238205  | Up   | 3.39E-09  | 6.88E-09   | Uncharacterized protein OS=Anopheles darlingi GN=AND_13841 PE=4 SV=1                     |
| CCG024989.1 | 622  | 26  | 153 | 1.79616254 | 8.59906165  | 2.259261328  | Up   | 4.60E-12  | 1.05E-11   | -                                                                                        |
| CCG009441.1 | 1440 | 52  | 153 | 1.55168486 | 3.714316907 | 1.259261328  | Up   | 9.15E-09  | 1.83E-08   | AAEL005091-PA OS=Aedes aegypti GN=AAEL005091 PE=4 SV=1                                   |
| CCG017464.1 | 1432 | 296 | 153 | 8.88201218 | 3.735067281 | -1.249752319 | Down | 2.87E-19  | 1.11E-18   | AAEL009480-PA OS=Aedes aegypti GN=AAEL009480 PE=4 SV=1                                   |
| CCG024450.1 | 2643 | 908 | 153 | 14.7622092 | 2.023691391 | -2.866847441 | Down | 1.10E-167 | 6.37E-167  | AAEL005793-PA OS=Aedes aegypti GN=AAEL005793 PE=4 SV=1                                   |
| CCG009385.1 | 1515 | 14  | 154 | 0.39708006 | 3.553514603 | 3.161744822  | Up   | 3.07E-08  | 6.02E-08   | AAEL003471-PA OS=Aedes aegypti GN=AAEL003471 PE=4 SV=1                                   |
| CCG011067.1 | 525  | 14  | 154 | 1.14585959 | 10.25442785 | 3.161744822  | Up   | 3.07E-08  | 6.00E-08   | -                                                                                        |
| CCG010278.1 | 2087 | 31  | 154 | 0.6382663  | 2.579575766 | 2.014903434  | Up   | 2.40E-13  | 6.77E-13   | Putative uncharacterized protein OS=Culex quinquefasciatus GN=CpipJ_CPIJ004626 PE=4 SV=1 |
| CCG021604.1 | 2853 | 36  | 154 | 0.54220485 | 1.88698725  | 1.799174743  | Up   | 1.33E-13  | 4.03E-13   | AAEL005992-PA OS=Aedes aegypti GN=AAEL005992 PE=4 SV=1                                   |
| CCG016162.1 | 946  | 47  | 154 | 2.13485996 | 5.690882265 | 1.414510893  | Up   | 2.99E-10  | 6.28E-10   | AAEL014058-PA OS=Aedes aegypti GN=AAEL014058 PE=4 SV=1                                   |
| CCG004044.1 | 771  | 54  | 154 | 3.0095534  | 6.98258706  | 1.214212242  | Up   | 2.10E-08  | 4.15E-08   | AAEL009431-PA OS=Aedes aegypti GN=AAEL009431 PE=3 SV=1                                   |
| CCG010174.2 | 1602 | 56  | 154 | 1.50206313 | 3.360533472 | 1.161744822  | Up   | 6.25E-08  | 1.21E-07   | AAEL006457-PA OS=Aedes aegypti GN=AAEL006457 PE=4 SV=1                                   |
| CCG001133.1 | 1893 | 264 | 154 | 5.99260958 | 2.843937994 | -1.075294375 | Down | 6.00E-14  | 1.99E-13   | AAEL005762-PA OS=Aedes aegypti GN=AAEL005762 PE=4 SV=1                                   |
| CCG015915.1 | 1022 | 316 | 154 | 13.286141  | 5.267685541 | -1.334681004 | Down | 1.63E-22  | 6.51E-22   | Voltage-dependent para-like sodium channel (Fragment) OS=Aedes albopictus PE=2 SV=1      |
| CCG023119.1 | 243  | 376 | 154 | 66.488149  | 22.15462808 | -1.585489107 | Down | 7.22E-34  | 3.11E-33   | -                                                                                        |

|             |      |      |     |            |             |              |      |          |          |                                                                                              |
|-------------|------|------|-----|------------|-------------|--------------|------|----------|----------|----------------------------------------------------------------------------------------------|
| CCG020995.1 | 1374 | 648  | 154 | 20.2652023 | 3.918176581 | -2.370750258 | Down | 4.46E-97 | 2.35E-96 | AGAP008408-PA OS=Anopheles gambiae GN=AGAP008408 PE=4 SV=4                                   |
| CCG020421.1 | 1146 | 1476 | 154 | 55.3432184 | 4.697709095 | -3.558377262 | Down | 0        | 0        | AAEL004058-PA OS=Aedes aegypti GN=AAEL004058 PE=4 SV=1                                       |
| CCG000785.1 | 660  | 4    | 155 | 0.26042263 | 8.209898333 | 4.978437609  | Up   | 2.95E-05 | 5.04E-05 | AAEL007204-PA OS=Aedes aegypti GN=AAEL007204 PE=4 SV=1                                       |
| CCG007918.1 | 921  | 16   | 155 | 0.74648833 | 5.883314766 | 2.978437609  | Up   | 7.09E-09 | 1.42E-08 | AAEL006871-PA OS=Aedes aegypti GN=AAEL006871 PE=4 SV=1                                       |
| CCG008704.1 | 1629 | 19   | 155 | 0.50118168 | 3.326293984 | 2.730510096  | Up   | 7.73E-10 | 1.60E-09 | Synaptic vesicular amine transporter OS=Culex quinquefasciatus GN=CpipJ_CPIJ012480 PE=4 SV=1 |
| CCG023123.1 | 690  | 27   | 155 | 1.6814244  | 7.852946231 | 2.223550107  | Up   | 2.28E-12 | 5.41E-12 | Putative uncharacterized protein OS=Culex quinquefasciatus GN=CpipJ_CPIJ008409 PE=4 SV=1     |
| CCG026328.1 | 2092 | 28   | 155 | 0.57512073 | 2.590120889 | 2.171082687  | Up   | 1.17E-12 | 2.85E-12 | AAEL010940-PA OS=Aedes aegypti GN=CYP314A1 PE=3 SV=2                                         |
| CCG002099.1 | 333  | 32   | 155 | 4.12922375 | 16.27187057 | 1.978437609  | Up   | 1.78E-13 | 5.19E-13 | AAEL006133-PA OS=Aedes aegypti GN=AAEL006133 PE=4 SV=1                                       |
| CCG012245.1 | 632  | 38   | 155 | 2.58362328 | 8.573628006 | 1.730510096  | Up   | 3.08E-13 | 8.48E-13 | -                                                                                            |
| CCG023086.1 | 1335 | 42   | 155 | 1.35185682 | 4.058826142 | 1.586120186  | Up   | 6.30E-12 | 1.42E-11 | AAEL010476-PA (Fragment) OS=Aedes aegypti GN=AAEL010476 PE=4 SV=1                            |
| CCG021479.1 | 2571 | 43   | 155 | 0.71866923 | 2.107558499 | 1.552172854  | Up   | 1.32E-11 | 2.91E-11 | AGAP005207-PA OS=Anopheles gambiae GN=AGAP005207 PE=4 SV=3                                   |
| CCG019366.1 | 1677 | 253  | 155 | 6.48261351 | 3.231087    | -1.004555966 | Down | 3.69E-12 | 8.56E-12 | AAEL005178-PA (Fragment) OS=Aedes aegypti GN=AAEL005178 PE=4 SV=1                            |
| CCG018667.1 | 1488 | 258  | 155 | 7.45039753 | 3.641487164 | -1.032789646 | Down | 6.97E-13 | 1.76E-12 | Ca-activated Cl channel protein OS=Culex quinquefasciatus GN=CpipJ_CPIJ009092 PE=4 SV=1      |

|             |      |     |     |            |             |              |      |           |            |                                                                                                                           |
|-------------|------|-----|-----|------------|-------------|--------------|------|-----------|------------|---------------------------------------------------------------------------------------------------------------------------|
| CCG022909.1 | 1125 | 267 | 155 | 10.1981503 | 4.816473689 | -1.082258323 | Down | 3.18E-14  | 1.10E-13   | Rho/rac/cdc GTPase-activating protein OS=Culex quinquefasciatus<br>AAEL008471-PA OS=Aedes aegypti GN=AAEL008471 PE=4 SV=1 |
| CCG027762.1 | 4128 | 326 | 155 | 3.39344319 | 1.312629094 | -1.370290545 | Down | 4.52E-24  | 1.82E-23   | AAEL011752-PA OS=Aedes aegypti GN=GST11 PE=3 SV=2                                                                         |
| CCG015905.1 | 1213 | 974 | 155 | 34.5033153 | 4.46705103  | -2.949340353 | Down | 3.84E-185 | 2.26E-184  | -                                                                                                                         |
| CCG025978.1 | 264  | 2   | 156 | 0.32552829 | 20.65716355 | 5.987715423  | Up   | 9.36E-05  | 0.00015405 | AAEL008458-PA OS=Aedes aegypti GN=AAEL008458 PE=4 SV=1                                                                    |
| CCG007355.1 | 186  | 3   | 156 | 0.69306024 | 29.31984503 | 5.402752922  | Up   | 5.28E-05  | 8.84E-05   | CEC-A OS=Anopheles melas GN=CEC-A PE=4 SV=1                                                                               |
| CCG022261.1 | 253  | 4   | 156 | 0.67936339 | 21.55530109 | 4.987715423  | Up   | 2.95E-05  | 5.03E-05   | AAEL009254-PA OS=Aedes aegypti GN=AAEL009254 PE=3 SV=1                                                                    |
| CCG015236.1 | 867  | 18  | 156 | 0.89210522 | 6.290070561 | 2.817790421  | Up   | 1.62E-09  | 3.33E-09   | Gastfura zinc finger protein XLCGF62.1 OS=Culex quinquefasciatus GN=CpipJ_CPIJ007367 PE=4 SV=1                            |
| CCG002267.1 | 1008 | 24  | 156 | 1.02308892 | 5.4102095   | 2.402752922  | Up   | 1.93E-11  | 4.23E-11   | AAEL010250-PA OS=Aedes aegypti GN=AAEL010250 PE=4 SV=1                                                                    |
| CCG023115.1 | 719  | 34  | 156 | 2.03194851 | 7.584827784 | 1.900252581  | Up   | 9.33E-14  | 2.94E-13   | AAEL005976-PA OS=Aedes aegypti GN=AAEL005976 PE=2 SV=1                                                                    |
| CCG009801.1 | 552  | 37  | 156 | 2.88021772 | 9.879513001 | 1.778262057  | Up   | 1.29E-13  | 3.96E-13   | AAEL012227-PA OS=Aedes aegypti GN=AAEL012227 PE=4 SV=1                                                                    |
| CCG004889.1 | 729  | 40  | 156 | 2.35773578 | 7.480783507 | 1.665787328  | Up   | 9.90E-13  | 2.45E-12   | AAEL006704-PA OS=Aedes aegypti GN=AAEL006704 PE=4 SV=1                                                                    |
| CCG018059.1 | 1059 | 41  | 156 | 1.66360634 | 5.149661168 | 1.630163418  | Up   | 2.12E-12  | 5.05E-12   | AAEL001996-PA OS=Aedes aegypti GN=AAEL001996 PE=4 SV=1                                                                    |
| CCG014718.1 | 2015 | 44  | 156 | 0.93829693 | 2.706447234 | 1.528283804  | Up   | 1.90E-11  | 4.18E-11   | AAEL010569-PA OS=Aedes aegypti GN=AAEL010569 PE=4 SV=1                                                                    |
| CCG014304.1 | 1113 | 46  | 156 | 1.77592794 | 4.899812378 | 1.464153467  | Up   | 7.75E-11  | 1.66E-10   | GG13338 OS=Drosophila erecta GN=GG13338 PE=4 SV=1                                                                         |
| CCG023036.1 | 1891 | 48  | 156 | 1.09071775 | 2.883919184 | 1.402752922  | Up   | 2.96E-10  | 6.22E-10   | AAEL007321-PA OS=Aedes aegypti GN=AAEL007321 PE=4 SV=1                                                                    |
| CCG020388.1 | 1488 | 52  | 156 | 1.50163051 | 3.664980629 | 1.287275705  | Up   | 3.59E-09  | 7.27E-09   |                                                                                                                           |

|             |      |     |     |            |             |              |      |           |           |                                                                                        |
|-------------|------|-----|-----|------------|-------------|--------------|------|-----------|-----------|----------------------------------------------------------------------------------------|
| CCG005925.1 | 1536 | 391 | 156 | 10.9382593 | 3.550449985 | -1.623309375 | Down | 2.51E-36  | 1.10E-35  | AAEL004048-PA OS=Aedes aegypti GN=AAEL004048 PE=4 SV=1                                 |
| CCG016460.1 | 873  | 657 | 156 | 32.3380477 | 6.246839836 | -2.372034138 | Down | 1.83E-98  | 9.67E-98  | AAEL004251-PA OS=Aedes aegypti GN=AAEL004251 PE=4 SV=1                                 |
| CCG019020.1 | 642  | 5   | 157 | 0.33465525 | 8.548986687 | 4.675005858  | Up   | 1.59E-05  | 2.76E-05  | AAEL008029-PA OS=Aedes aegypti GN=AAEL008029 PE=3 SV=1                                 |
| CCG022425.1 | 852  | 6   | 157 | 0.30260376 | 6.441842081 | 4.411971452  | Up   | 8.38E-06  | 1.48E-05  | Techniquein-55 OS=Culex quinquefasciatus GN=CpipJ_CPIJ014772 PE=4 SV=1                 |
| CCG006533.1 | 1617 | 8   | 157 | 0.21258991 | 3.394217349 | 3.996933953  | Up   | 2.19E-06  | 3.97E-06  | AAEL001053-PA OS=Aedes aegypti GN=AAEL001053 PE=4 SV=1                                 |
| CCG018201.1 | 332  | 8   | 157 | 1.03541529 | 16.53147426 | 3.996933953  | Up   | 2.19E-06  | 3.97E-06  | Cell division protein kinase 2 OS=Culex quinquefasciatus GN=CpipJ_CPIJ001155 PE=4 SV=1 |
| CCG018601.1 | 714  | 15  | 157 | 0.90272552 | 7.686903996 | 3.090043357  | Up   | 1.48E-08  | 2.93E-08  | AAEL006106-PA OS=Aedes aegypti GN=AAEL006106 PE=4 SV=1                                 |
| CCG004322.1 | 5726 | 20  | 157 | 0.15008639 | 0.958513701 | 2.675005858  | Up   | 3.69E-10  | 7.73E-10  | -                                                                                      |
| CCG021151.1 | 2820 | 40  | 157 | 0.60949978 | 1.946258671 | 1.675005858  | Up   | 7.04E-13  | 1.77E-12  | AAEL011173-PA OS=Aedes aegypti GN=AAEL011173 PE=4 SV=1                                 |
| CCG000918.1 | 1069 | 44  | 157 | 1.76863267 | 5.134190321 | 1.537502334  | Up   | 1.34E-11  | 2.96E-11  | AAEL007497-PA OS=Aedes aegypti GN=AAEL007497 PE=4 SV=1                                 |
| CCG014648.1 | 1027 | 44  | 157 | 1.84096234 | 5.344157209 | 1.537502334  | Up   | 1.34E-11  | 2.96E-11  | AAEL004220-PA OS=Aedes aegypti GN=AAEL004220 PE=4 SV=1                                 |
| CCG002453.1 | 1200 | 46  | 157 | 1.64717316 | 4.573707878 | 1.473371997  | Up   | 5.50E-11  | 1.18E-10  | AAEL011248-PA OS=Aedes aegypti GN=AAEL011248 PE=4 SV=1                                 |
| CCG008531.1 | 1065 | 54  | 157 | 2.17874711 | 5.153473665 | 1.242046451  | Up   | 8.45E-09  | 1.69E-08  | AAEL002469-PA OS=Aedes aegypti GN=AAEL002469 PE=4 SV=1                                 |
| CCG018471.1 | 1026 | 463 | 157 | 19.3908257 | 5.349365939 | -1.857934431 | Down | 2.33E-51  | 1.09E-50  | AAEL007164-PA OS=Aedes aegypti GN=AAEL007164 PE=4 SV=1                                 |
| CCG021854.1 | 1062 | 718 | 157 | 29.0511012 | 5.1680315   | -2.490906081 | Down | 8.24E-114 | 4.45E-113 | AAEL005979-PA (Fragment) OS=Aedes aegypti GN=SCR3 PE=4 SV=2                            |
| CCG002765.1 | 1698 | 862 | 157 | 21.8138464 | 3.232302387 | -2.754610106 | Down | 1.29E-152 | 7.35E-152 | AAEL012509-PA (Fragment) OS=Aedes aegypti GN=AAEL012509 PE=4 SV=1                      |

|             |      |     |     |            |             |              |      |          |          |                                                                                         |
|-------------|------|-----|-----|------------|-------------|--------------|------|----------|----------|-----------------------------------------------------------------------------------------|
| CCG015786.1 | 1134 | 6   | 158 | 0.22735309 | 4.870729921 | 4.421131451  | Up   | 8.38E-06 | 1.47E-05 | AAEL007080-PA OS=Aedes aegypti GN=AAEL007686 PE=4 SV=1                                  |
| CCG022535.1 | 954  | 7   | 158 | 0.31529155 | 5.789735566 | 4.19873903   | Up   | 4.31E-06 | 7.70E-06 | AAEL000643-PA OS=Aedes aegypti GN=AAEL006643 PE=4 SV=1                                  |
| CCG017888.1 | 480  | 14  | 158 | 1.25328393 | 11.50709944 | 3.19873903   | Up   | 3.07E-08 | 6.01E-08 | AAEL013597-PA OS=Aedes aegypti GN=AAEL013597 PE=4 SV=1                                  |
| CCG024173.1 | 1449 | 32  | 158 | 0.94895204 | 3.81187559  | 2.006093952  | Up   | 1.77E-13 | 5.16E-13 | AAEL015402-PA OS=Aedes aegypti GN=AAEL015402 PE=4 SV=1                                  |
| CCG026425.1 | 1761 | 37  | 158 | 0.90282804 | 3.136517734 | 1.796640586  | Up   | 8.70E-14 | 2.77E-13 | AAEL001146-PA OS=Aedes aegypti GN=AAEL001146 PE=3 SV=1                                  |
| CCG015469.1 | 2115 | 38  | 158 | 0.77203306 | 2.611540298 | 1.758166439  | Up   | 1.27E-13 | 3.90E-13 | N-acetylglucosaminyltransferase OS=Culex quinquefasciatus GN=CpipJ_CPIJ005697 PE=3 SV=1 |
| CCG015844.1 | 5040 | 45  | 158 | 0.38365834 | 1.095914232 | 1.514240856  | Up   | 1.92E-11 | 4.23E-11 | AAEL003012-PA OS=Aedes aegypti GN=AAEL003012 PE=4 SV=1                                  |
| CCG005359.1 | 903  | 52  | 158 | 2.47444762 | 6.116730598 | 1.305654234  | Up   | 1.91E-09 | 3.91E-09 | AAEL010800-PA OS=Aedes aegypti GN=AAEL010800 PE=4 SV=1                                  |
| CCG023172.1 | 1581 | 316 | 158 | 8.58851116 | 3.493616528 | -1.297686796 | Down | 1.29E-21 | 5.09E-21 | AAEL007080-PA OS=Aedes aegypti GN=AAEL007088 PE=4 SV=1                                  |
| CCG004203.1 | 1695 | 415 | 158 | 10.5206135 | 3.258647628 | -1.690873574 | Down | 1.10E-40 | 4.92E-40 | AAEL000780-PA OS=Aedes aegypti GN=AAEL000780 PE=4 SV=1                                  |
| CCG025773.1 | 3891 | 468 | 158 | 5.16829499 | 1.419534241 | -1.864270768 | Down | 3.94E-52 | 1.85E-51 | AAEL005859-PA OS=Aedes aegypti GN=AAEL005859 PE=4 SV=1                                  |
| CCG000091.1 | 3789 | 570 | 158 | 6.46417227 | 1.457748147 | -2.148724157 | Down | 6.75E-76 | 3.39E-75 | AGAP013009-PA OS=Anopheles gambiae GN=AgaP_AGAP013009 PE=4 SV=1                         |
| CCG014324.1 | 804  | 0   | 159 | 0.001      | 6.913390556 | 12.75517771  | Up   | 4.44E-16 | 1.66E-15 | AAEL009778-PA OS=Aedes aegypti GN=AAEL009778 PE=4 SV=1                                  |
| CCG024054.1 | 1143 | 7   | 159 | 0.26315673 | 4.862962386 | 4.207841237  | Up   | 4.31E-06 | 7.70E-06 | AAEL013016-PA OS=Aedes aegypti GN=AAEL013016 PE=4 SV=1                                  |
| CCG009508.1 | 2028 | 13  | 159 | 0.27544702 | 2.74081164  | 3.314756441  | Up   | 6.34E-08 | 1.23E-07 | AAEL001370-PA OS=Aedes aegypti GN=AAEL001370 PE=3 SV=1                                  |
| CCG014434.1 | 612  | 23  | 159 | 1.61487565 | 9.082297397 | 2.491634203  | Up   | 4.01E-11 | 8.67E-11 | AAEL001738-PA OS=Aedes aegypti GN=AAEL001738 PE=4 SV=1                                  |



|             |      |     |     |            |             |              |      |           |           |                                                                                          |
|-------------|------|-----|-----|------------|-------------|--------------|------|-----------|-----------|------------------------------------------------------------------------------------------|
| CCG004819.1 | 369  | 23  | 159 | 2.67833034 | 15.06332251 | 2.491634203  | Up   | 4.01E-11  | 8.68E-11  | AAEL008426-PA OS=Aedes aegypti GN=AAEL008426 PE=4 SV=1                                   |
| CCG012047.1 | 884  | 46  | 159 | 2.23598167 | 6.287744352 | 1.491634203  | Up   | 2.76E-11  | 6.01E-11  | AAEL003050-PA OS=Aedes aegypti GN=AAEL003050 PE=4 SV=1                                   |
| CCG002426.1 | 502  | 292 | 159 | 24.9943476 | 11.07244224 | -1.1746284   | Down | 2.19E-17  | 8.31E-17  | Uncharacterized protein OS=Anopheles darlingi GN=AND_07716 PE=4 SV=1                     |
| CCG028089.1 | 1716 | 309 | 159 | 7.73755711 | 3.23914103  | -1.256266869 | Down | 3.37E-20  | 1.32E-19  | Putative uncharacterized protein OS=Culex quinquefasciatus GN=CpipJ_CPIJ008574 PE=4 SV=1 |
| CCG001708.1 | 963  | 335 | 159 | 14.9479347 | 5.771927318 | -1.372821126 | Down | 9.30E-25  | 3.77E-24  | AAEL010049-PA OS=Aedes aegypti GN=AAEL010049 PE=4 SV=1                                   |
| CCG015496.1 | 1164 | 506 | 159 | 18.6792833 | 4.775228528 | -1.967797416 | Down | 2.21E-60  | 1.07E-59  | AAEL005781-PA OS=Aedes aegypti GN=AAEL005781 PE=4 SV=1                                   |
| CCG008872.1 | 1166 | 648 | 159 | 23.8802642 | 4.767037742 | -2.324653844 | Down | 8.18E-95  | 4.29E-94  | AAEL009217-PA OS=Aedes aegypti GN=AAEL009217 PE=4 SV=1                                   |
| CCG026979.1 | 1818 | 659 | 159 | 15.5759379 | 3.057407044 | -2.348938496 | Down | 1.32E-97  | 6.94E-97  | AAEL008625-PA OS=Aedes aegypti GN=AAEL008625 PE=3 SV=1                                   |
| CCG019802.1 | 745  | 984 | 159 | 56.7546562 | 7.460893969 | -2.927318346 | Down | 1.41E-185 | 8.32E-185 | AAEL007762-PA OS=Aedes aegypti GN=AAEL007762 PE=4 SV=1                                   |
| CCG002965.1 | 390  | 0   | 160 | 0.001      | 14.34185714 | 13.80794423  | Up   | 4.44E-16  | 1.66E-15  | AAEL011472-PA OS=Aedes aegypti GN=AAEL011472 PE=4 SV=1                                   |
| CCG022834.1 | 1617 | 7   | 160 | 0.18601617 | 3.459075005 | 4.216886377  | Up   | 4.31E-06  | 7.70E-06  | AAEL006712-PA OS=Aedes aegypti GN=AAEL006712 PE=4 SV=1                                   |
| CCG006182.1 | 600  | 15  | 160 | 1.07424337 | 9.322207139 | 3.117350703  | Up   | 1.48E-08  | 2.92E-08  | -                                                                                        |
| CCG012160.1 | 1002 | 29  | 160 | 1.24363503 | 5.582159964 | 2.166260304  | Up   | 6.66E-13  | 1.69E-12  | AAEL002712-PA OS=Aedes aegypti GN=AAEL002712 PE=4 SV=1                                   |
| CCG005372.1 | 906  | 31  | 160 | 1.47026686 | 6.173647112 | 2.070044988  | Up   | 2.40E-13  | 6.77E-13  | Putative uncharacterized protein OS=Culex quinquefasciatus GN=CpipJ_CPIJ000877 PE=4 SV=1 |
| CCG011518.1 | 1425 | 40  | 160 | 1.20616799 | 3.925139848 | 1.702313204  | Up   | 2.75E-13  | 7.66E-13  | AAEL011900-PA OS=Aedes aegypti GN=AAEL011900 PE=4 SV=1                                   |
| CCG019842.1 | 1191 | 46  | 160 | 1.65962031 | 4.696326015 | 1.500679343  | Up   | 1.95E-11  | 4.28E-11  | AAEL005363-PA (Fragment) OS=Aedes aegypti GN=AAEL005363 PE=4 SV=1                        |

|             |      |      |     |            |             |              |      |          |          |                                                                                                    |
|-------------|------|------|-----|------------|-------------|--------------|------|----------|----------|----------------------------------------------------------------------------------------------------|
| CCG020596.1 | 1203 | 54   | 160 | 1.92881602 | 4.64947987  | 1.269353797  | Up   | 3.35E-09 | 6.81E-09 | Krüppel protein OS=Culex quinquefasciatus GN=CpipJ_CPIJ014712 PE=4 SV=1                            |
| CCG026505.1 | 1380 | 338  | 160 | 10.5244712 | 4.053133539 | -1.376638138 | Down | 4.59E-25 | 1.86E-24 | AAEL002397-PA OS=Aedes aegypti GN=AAEL002397 PE=4 SV=1                                             |
| CCG024547.1 | 1023 | 449  | 160 | 18.8596391 | 5.46757017  | -1.786330336 | Down | 2.69E-47 | 1.24E-46 | AGAP005912-PA OS=Anopheles gambiae GN=AGAP005912 PE=4 SV=3                                         |
| CCG005886.1 | 1350 | 518  | 160 | 16.4876463 | 4.143203173 | -1.992566989 | Down | 8.71E-63 | 4.23E-62 | AAEL012101-PA OS=Aedes aegypti GN=AAEL012101 PE=3 SV=1                                             |
| CCG017033.1 | 3378 | 2023 | 160 | 25.733503  | 1.655809439 | -3.958039306 | Down | 0        | 0        | Insulin receptor tyrosine kinase substrate OS=Culex quinquefasciatus GN=CpipJ_CPIJ007108 PE=4 SV=1 |
| CCG013395.1 | 1755 | 2727 | 160 | 66.7683569 | 3.187079364 | -4.388857686 | Down | 0        | 0        | Uncharacterized protein OS=Anopheles darlingi GN=AND_09568 PE=4 SV=1                               |
| CCG011364.1 | 645  | 8    | 161 | 0.53295795 | 8.726019473 | 4.033230082  | Up   | 2.19E-06 | 3.96E-06 | AAEL005890-PA OS=Aedes aegypti GN=AAEL005890 PE=4 SV=1                                             |
| CCG006241.1 | 627  | 21   | 161 | 1.43917771 | 8.976527209 | 2.640912659  | Up   | 1.76E-10 | 3.73E-10 | RPA-interacting protein alpha OS=Culex quinquefasciatus GN=CpipJ_CPIJ008848 PE=4 SV=1              |
| CCG001224.3 | 1728 | 25   | 161 | 0.62166861 | 3.257107963 | 2.389373892  | Up   | 9.32E-12 | 2.08E-11 | AAEL003549-PA OS=Aedes aegypti GN=AAEL003549 PE=4 SV=1                                             |
| CCG002836.1 | 672  | 46   | 161 | 2.94138064 | 8.375420477 | 1.509668126  | Up   | 1.38E-11 | 3.05E-11 | AAEL000279-PA (Fragment) OS=Aedes aegypti GN=AAEL000279 PE=3 SV=1                                  |
| CCG012779.1 | 900  | 59   | 161 | 2.81690482 | 6.253647289 | 1.150587033  | Up   | 3.98E-08 | 7.76E-08 | AAEL005665-PA (Fragment) OS=Aedes aegypti GN=SRPN3 PE=3 SV=2                                       |
| CCG009665.1 | 2052 | 283  | 161 | 5.92613786 | 2.742827758 | -1.111428161 | Down | 1.39E-15 | 5.04E-15 | AAEL010952-PA OS=Aedes aegypti GN=AAEL010952 PE=4 SV=1                                             |
| CCG024737.1 | 2514 | 320  | 161 | 5.46949685 | 2.238775879 | -1.288698013 | Down | 1.19E-21 | 4.71E-21 | AAEL003741-PA OS=Aedes aegypti GN=AAEL003741 PE=4 SV=1                                             |

|             |      |      |     |            |             |              |      |           |            |                                                                                                |
|-------------|------|------|-----|------------|-------------|--------------|------|-----------|------------|------------------------------------------------------------------------------------------------|
| CCG000723.1 | 1512 | 366  | 161 | 10.401404  | 3.722409101 | -1.482469756 | Down | 4.95E-30  | 2.08E-29   | Voltage-dependent para-like sodium channel (Fragment)<br>OS=Aedes albopictus PE=2 SV=1         |
| CCG000402.1 | 960  | 719  | 161 | 32.1825408 | 5.862794334 | -2.456617879 | Down | 3.87E-112 | 2.09E-111  | AAEL007213-PA OS=Aedes aegypti GN=AAEL007213 PE=3 SV=1                                         |
| CCG024223.1 | 1285 | 1289 | 161 | 43.1034925 | 4.379986428 | -3.298806466 | Down | 5.77E-273 | 3.59E-272  | -                                                                                              |
| CCG007962.1 | 2772 | 2    | 162 | 0.03100269 | 2.043016175 | 6.042163207  | Up   | 9.36E-05  | 0.00015391 | AAEL009308-PA OS=Aedes aegypti GN=AAEL009308 PE=4 SV=1                                         |
| CCG004424.1 | 948  | 2    | 162 | 0.09065345 | 5.97388274  | 6.042163207  | Up   | 9.36E-05  | 0.00015392 | Putative salivary protein 34k-1<br>OS=Aedes albopictus PE=2 SV=1                               |
| CCG027104.1 | 330  | 9    | 162 | 1.17190185 | 17.16133587 | 3.872238205  | Up   | 1.09E-06  | 2.01E-06   | AAEL014451-PA OS=Aedes aegypti GN=AAEL014451 PE=4 SV=1                                         |
| CCG000588.1 | 544  | 18   | 162 | 1.42179269 | 10.41036919 | 2.872238205  | Up   | 1.62E-09  | 3.32E-09   | Histone transcription regulator<br>OS=Culex quinquefasciatus<br>GN=CpipJ_CPIJ002429 PE=4 SV=1  |
| CCG022825.1 | 567  | 20   | 162 | 1.51568729 | 9.988079078 | 2.720235112  | Up   | 3.69E-10  | 7.71E-10   | AAEL012187-PA OS=Aedes aegypti GN=AAEL012187 PE=4 SV=1                                         |
| CCG023931.1 | 1668 | 44   | 162 | 1.1334942  | 3.39522832  | 1.582731588  | Up   | 2.28E-12  | 5.41E-12   | AAEL001475-PA OS=Aedes aegypti GN=AAEL001475 PE=4 SV=1                                         |
| CCG015399.1 | 351  | 52   | 162 | 6.36588661 | 16.13458928 | 1.341723489  | Up   | 5.31E-10  | 1.11E-09   | AAEL004276-PA OS=Aedes aegypti GN=AAEL004276 PE=4 SV=1                                         |
| CCG027758.1 | 1566 | 289  | 162 | 7.92991909 | 3.616373459 | -1.132762476 | Down | 2.48E-16  | 9.30E-16   | AAEL000714-PA OS=Aedes aegypti GN=AAEL000714 PE=4 SV=1                                         |
| CCG026547.1 | 283  | 289  | 162 | 43.8807537 | 20.01145172 | -1.132762476 | Down | 2.48E-16  | 9.30E-16   | Aquaporin-1 OS=Culex quinquefasciatus<br>GN=CpipJ_CPIJ015704 PE=4 SV=1                         |
| CCG023276.2 | 378  | 342  | 162 | 38.8773789 | 14.98211862 | -1.375689308 | Down | 2.56E-25  | 1.05E-24   | Putative uncharacterized protein<br>OS=Culex quinquefasciatus<br>GN=CpipJ_CPIJ009959 PE=4 SV=1 |
| CCG013181.1 | 1110 | 389  | 162 | 15.0587629 | 5.102018772 | -1.561463138 | Down | 3.06E-34  | 1.32E-33   | AAEL003614-PA OS=Aedes aegypti GN=CLIPB40 PE=3 SV=1                                            |
| CCG025398.1 | 1785 | 514  | 162 | 12.3733578 | 3.172683942 | -1.963461342 | Down | 3.93E-61  | 1.90E-60   | AAEL005829-PA OS=Aedes aegypti GN=AAEL005829 PE=4 SV=1                                         |
| CCG025113.1 | 558  | 17   | 163 | 1.30911378 | 10.21182637 | 2.963578517  | Up   | 3.39E-09  | 6.88E-09   | -                                                                                              |

|             |      |     |     |            |             |              |      |           |           |                                                                         |
|-------------|------|-----|-----|------------|-------------|--------------|------|-----------|-----------|-------------------------------------------------------------------------|
| CCG006907.1 | 1032 | 60  | 163 | 2.49824038 | 5.521510769 | 1.144150762  | Up   | 3.76E-08  | 7.35E-08  | AAEL003956-PA OS=Aedes aegypti GN=AAEL003956 PE=4 SV=1                  |
| CCG002034.1 | 2214 | 323 | 163 | 6.26884565 | 2.573712337 | -1.284348997 | Down | 9.87E-22  | 3.91E-21  | AAEL001299-PA OS=Aedes aegypti GN=AAEL001299 PE=4 SV=1                  |
| CCG003407.1 | 1314 | 486 | 163 | 15.8929155 | 4.336529006 | -1.873771146 | Down | 1.95E-54  | 9.23E-54  | AAEL003781-PA OS=Aedes aegypti GN=AAEL003781 PE=3 SV=1                  |
| CCG009334.1 | 2823 | 628 | 163 | 9.55897745 | 2.018490653 | -2.243579391 | Down | 4.76E-88  | 2.46E-87  | AAEL007535-PA OS=Aedes aegypti GN=AAEL007535 PE=4 SV=1                  |
| CCG002637.1 | 1323 | 977 | 163 | 31.731996  | 4.307028809 | -2.881173394 | Down | 3.11E-181 | 1.82E-180 | AAEL014436-PA (Fragment) OS=Aedes aegypti GN=AAEL014436 PE=4 SV=1       |
| CCG014123.1 | 645  | 0   | 164 | 0.001      | 8.88861611  | 13.1177431   | Up   | 4.44E-16  | 1.63E-15  | AAEL004817-PA OS=Aedes aegypti GN=AAEL004817 PE=4 SV=1                  |
| CCG028111.1 | 1725 | 0   | 164 | 0.001      | 3.323569502 | 11.69851781  | Up   | 4.44E-16  | 1.64E-15  | Putative 62 kDa salivary secreted protein OS=Aedes albopictus PE=2 SV=1 |
| CCG026730.1 | 285  | 21  | 164 | 3.16619097 | 20.11634172 | 2.667547786  | Up   | 1.76E-10  | 3.72E-10  | AAEL003821-PA OS=Aedes aegypti GN=AAEL003821 PE=4 SV=1                  |
| CCG012535.2 | 480  | 27  | 164 | 2.41704757 | 11.9440779  | 2.304977706  | Up   | 2.28E-12  | 5.40E-12  | AAEL012816-PA OS=Aedes aegypti GN=AAEL012816 PE=4 SV=1                  |
| CCG014450.1 | 1005 | 28  | 164 | 1.19716674 | 5.70463422  | 2.252510286  | Up   | 1.17E-12  | 2.85E-12  | AAEL013879-PA OS=Aedes aegypti GN=AAEL013879 PE=4 SV=1                  |
| CCG024076.1 | 450  | 33  | 164 | 3.15111387 | 12.74034976 | 2.015471089  | Up   | 1.31E-13  | 4.00E-13  | AAEL006555-PA OS=Aedes aegypti GN=AAEL006555 PE=4 SV=1                  |
| CCG027510.1 | 965  | 37  | 164 | 1.64754423 | 5.941095742 | 1.850411843  | Up   | 5.48E-14  | 1.83E-13  | AAEL005229-PA OS=Aedes aegypti GN=AAEL005229 PE=4 SV=1                  |
| CCG002475.1 | 474  | 42  | 164 | 3.80744484 | 12.09526876 | 1.667547786  | Up   | 3.07E-13  | 8.46E-13  | AAEL009769-PA OS=Aedes aegypti GN=AAEL009769 PE=4 SV=1                  |
| CCG007364.1 | 1817 | 43  | 164 | 1.01689521 | 3.155287502 | 1.633600454  | Up   | 5.91E-13  | 1.52E-12  | AAEL007980-PA OS=Aedes aegypti GN=AAEL007980 PE=4 SV=1                  |
| CCG018669.1 | 1836 | 45  | 164 | 1.05317977 | 3.122634744 | 1.568012112  | Up   | 2.27E-12  | 5.40E-12  | AAEL009724-PA OS=Aedes aegypti GN=AAEL009724 PE=4 SV=1                  |
| CCG008437.1 | 1314 | 297 | 164 | 9.71233728 | 4.363133478 | -1.154453912 | Down | 3.25E-17  | 1.23E-16  | AAEL010590-PA OS=Aedes aegypti GN=AAEL010590 PE=4 SV=1                  |

|             |      |     |     |            |             |              |      |           |           |                                                                                                |
|-------------|------|-----|-----|------------|-------------|--------------|------|-----------|-----------|------------------------------------------------------------------------------------------------|
| CCG025599.1 | 1049 | 302 | 164 | 12.3706958 | 5.465354996 | -1.178539531 | Down | 5.12E-18  | 1.96E-17  | AAEL002512-PA OS=Aedes aegypti GN=AAEL002512 PE=4 SV=1                                         |
| CCG014617.1 | 2112 | 313 | 164 | 6.36814722 | 2.714563158 | -1.230153638 | Down | 7.99E-20  | 3.11E-19  | Putative uncharacterized protein OS=Culex quinquefasciatus GN=CpipJ_CPIJ005107 PE=4 SV=1       |
| CCG016988.1 | 332  | 764 | 164 | 98.8821604 | 17.26854636 | -2.51756362  | Down | 1.74E-122 | 9.58E-122 | -                                                                                              |
| CCG017554.1 | 933  | 814 | 164 | 37.4891361 | 6.144863227 | -2.609019776 | Down | 8.39E-136 | 4.69E-135 | AAEL008912-PA OS=Aedes aegypti GN=AAEL008912 PE=4 SV=1                                         |
| CCG025842.2 | 1506 | 19  | 165 | 0.54211485 | 3.830090085 | 2.820707905  | Up   | 7.73E-10  | 1.60E-09  | AAEL008914-PA OS=Aedes aegypti GN=AAEL008914 PE=4 SV=1                                         |
| CCG006455.1 | 747  | 20  | 165 | 1.15046144 | 7.721707721 | 2.746707323  | Up   | 3.69E-10  | 7.72E-10  | AGAP011122-PA OS=Anopheles gambiae GN=AGAP011122 PE=3 SV=4                                     |
| CCG009384.1 | 987  | 21  | 165 | 0.91424967 | 5.844088822 | 2.676317995  | Up   | 1.76E-10  | 3.73E-10  | AAEL003484-PA OS=Aedes aegypti GN=AAEL003484 PE=4 SV=1                                         |
| CCG007809.1 | 1353 | 22  | 165 | 0.69869487 | 4.263204484 | 2.609203799  | Up   | 8.38E-11  | 1.80E-10  | AAEL012306-PA OS=Aedes aegypti GN=AAEL012306 PE=4 SV=1                                         |
| CCG023303.1 | 666  | 23  | 165 | 1.48393978 | 8.660834335 | 2.545073462  | Up   | 4.01E-11  | 8.66E-11  | AAEL001131-PA OS=Aedes aegypti GN=AAEL001131 PE=4 SV=1                                         |
| CCG002119.1 | 1551 | 25  | 165 | 0.69261339 | 3.718965614 | 2.424779228  | Up   | 9.32E-12  | 2.08E-11  | AAEL003879-PA OS=Aedes aegypti GN=AAEL003879 PE=4 SV=1                                         |
| CCG006639.1 | 1422 | 55  | 165 | 1.66197989 | 4.056340132 | 1.287275705  | Up   | 1.27E-09  | 2.61E-09  | AAEL014413-PA OS=Aedes aegypti GN=CYP304C1 PE=3 SV=1                                           |
| CCG005339.1 | 1138 | 58  | 165 | 2.19002162 | 5.068642942 | 1.210654423  | Up   | 7.10E-09  | 1.42E-08  | AAEL006285-PA OS=Aedes aegypti GN=AAEL006285 PE=4 SV=1                                         |
| CCG016739.1 | 870  | 295 | 165 | 14.5701974 | 6.630018009 | -1.135935726 | Down | 1.04E-16  | 3.93E-16  | AAEL000953-PA OS=Aedes aegypti GN=AAEL000953 PE=4 SV=1                                         |
| CCG020845.1 | 450  | 337 | 165 | 32.1795568 | 12.81803482 | -1.327969363 | Down | 9.92E-24  | 3.99E-23  | 26S proteasome regulatory complex subunit RPN5/PSMD12 OS=Aedes aegypti GN=AAEL014325 PE=2 SV=1 |
| CCG024485.1 | 1905 | 668 | 165 | 15.0676025 | 3.02788224  | -2.315068874 | Down | 3.39E-97  | 1.78E-96  | AAEL010268-PA OS=Aedes aegypti GN=AAEL010268 PE=4 SV=1                                         |
| CCG002812.1 | 964  | 7   | 166 | 0.31202089 | 6.019786249 | 4.269997713  | Up   | 4.31E-06  | 7.69E-06  | AAEL006009-PA OS=Aedes aegypti GN=AAEL006009 PE=4 SV=1                                         |

|             |      |     |     |            |             |              |      |           |            |                                                                                |
|-------------|------|-----|-----|------------|-------------|--------------|------|-----------|------------|--------------------------------------------------------------------------------|
| CCG022235.1 | 651  | 14  | 166 | 0.92408031 | 8.91409208  | 3.269997713  | Up   | 3.07E-08  | 6.01E-08   | AAEL013578-PA OS=Aedes aegypti GN=AAEL013578 PE=4 SV=1                         |
| CCG014734.1 | 892  | 30  | 166 | 1.44517045 | 6.505688278 | 2.17046204   | Up   | 3.71E-13  | 9.95E-13   | AAEL006838-PA OS=Aedes aegypti GN=AAEL006838 PE=4 SV=1                         |
| CCG019143.1 | 2116 | 56  | 166 | 1.13719524 | 2.742473509 | 1.269997713  | Up   | 1.67E-09  | 3.42E-09   | AAEL006381-PA OS=Aedes aegypti GN=AAEL006381 PE=4 SV=1                         |
| CCG006651.1 | 1008 | 59  | 166 | 2.51509359 | 5.757017802 | 1.194709586  | Up   | 9.14E-09  | 1.83E-08   | AAEL005746-PA OS=Aedes aegypti GN=AAEL005746 PE=4 SV=1                         |
| CCG012880.1 | 915  | 60  | 166 | 2.81768752 | 6.342157316 | 1.17046204   | Up   | 1.57E-08  | 3.11E-08   | AAEL011624-PA OS=Aedes aegypti GN=AAEL011624 PE=3 SV=1                         |
| CCG013350.1 | 976  | 62  | 166 | 2.72963478 | 5.945772484 | 1.123156325  | Up   | 4.48E-08  | 8.71E-08   | AAEL008250-PA OS=Aedes aegypti GN=AAEL008250 PE=4 SV=1                         |
| CCG012892.1 | 1184 | 67  | 166 | 2.43156437 | 4.901244885 | 1.011263445  | Up   | 5.04E-07  | 9.40E-07   | AAEL009499-PA OS=Aedes aegypti GN=AAEL009499 PE=4 SV=1                         |
| CCG019885.1 | 1461 | 451 | 166 | 13.2644424 | 3.971987641 | -1.739630988 | Down | 8.05E-46  | 3.69E-45   | AAEL009920-PA OS=Aedes aegypti GN=AAEL009920 PE=4 SV=1                         |
| CCG009309.1 | 828  | 742 | 166 | 38.5066945 | 7.008543411 | -2.457922741 | Down | 9.71E-116 | 5.27E-115  | Putative salivary secreted protein 275 OS=Aedes albopictus PE=2 SV=1           |
| CCG026878.1 | 1062 | 787 | 166 | 31.8429201 | 5.464288083 | -2.54286719  | Down | 1.41E-127 | 7.81E-127  | AAEL010068-PA OS=Aedes aegypti GN=AAEL010068 PE=4 SV=1                         |
| CCG011996.1 | 1068 | 1   | 167 | 0.04023383 | 5.466322304 | 7.086017496  | Up   | 0.000587  | 0.00091768 | AAEL008570-PA OS=Aedes aegypti GN=AAEL008570 PE=3 SV=1                         |
| CCG015980.1 | 333  | 25  | 167 | 3.22595605 | 17.53162829 | 2.442161307  | Up   | 9.32E-12  | 2.08E-11   | AAEL003906-PA OS=Aedes aegypti GN=AAEL003906 PE=4 SV=1                         |
| CCG011934.1 | 403  | 32  | 167 | 3.41198885 | 14.48643231 | 2.086017496  | Up   | 1.77E-13  | 5.17E-13   | -                                                                              |
| CCG007295.1 | 1570 | 39  | 167 | 1.06740105 | 3.71849186  | 1.800615277  | Up   | 7.93E-14  | 2.55E-13   | AAEL013462-PA OS=Aedes aegypti GN=AAEL013462 PE=4 SV=1                         |
| CCG000184.1 | 1649 | 40  | 167 | 1.04232225 | 3.540347011 | 1.764089401  | Up   | 8.28E-14  | 2.66E-13   | Quinone oxidoreductase OS=Culex quinquefasciatus GN=CpipJ_CPIJ019133 PE=4 SV=1 |
| CCG027725.1 | 375  | 41  | 167 | 4.69802432 | 15.56808592 | 1.728465492  | Up   | 1.35E-13  | 4.07E-13   | AAEL006792-PA OS=Aedes aegypti GN=AAEL006792 PE=4 SV=1                         |
| CCG001937.1 | 3270 | 387 | 167 | 5.08540896 | 1.785330954 | -1.51017226  | Down | 1.67E-32  | 7.11E-32   | Nfr3 OS=Culex quinquefasciatus GN=CpipJ_CPIJ017533 PE=4 SV=1                   |

|             |      |     |     |            |             |              |      |          |           |                                                                         |
|-------------|------|-----|-----|------------|-------------|--------------|------|----------|-----------|-------------------------------------------------------------------------|
| CCG014444.1 | 1983 | 465 | 167 | 10.0761102 | 2.944040454 | -1.77506941  | Down | 1.67E-48 | 7.74E-48  | AAEL014970-PA (Fragment)<br>OS=Aedes aegypti<br>GN=AAEL014970 PE=4 SV=1 |
| CCG017353.1 | 270  | 1   | 168 | 0.15914717 | 21.75181666 | 7.094630627  | Up   | 0.000587 | 0.0009182 | AAEL000323-PA OS=Aedes<br>aegypti GN=AAEL000323 PE=4<br>SV=1            |
| CCG023510.1 | 1938 | 14  | 168 | 0.31041088 | 3.030438853 | 3.287275705  | Up   | 3.07E-08 | 6.02E-08  | AAEL000199-PA OS=Aedes<br>aegypti GN=AAEL000199 PE=3<br>SV=1            |
| CCG021244.2 | 663  | 22  | 168 | 1.42584338 | 8.858205879 | 2.635199008  | Up   | 8.38E-11 | 1.80E-10  | AAEL001871-PA OS=Aedes<br>aegypti GN=AAEL001871 PE=4<br>SV=1            |
| CCG020384.3 | 1611 | 32  | 168 | 0.8535267  | 3.645555865 | 2.094630627  | Up   | 1.77E-13 | 5.16E-13  | AAEL002222-PA OS=Aedes<br>aegypti GN=AAEL002222 PE=4<br>SV=1            |
| CCG021086.2 | 306  | 43  | 168 | 6.03823068 | 19.1927794  | 1.668365872  | Up   | 2.00E-13 | 5.77E-13  | AAEL001642-PA OS=Aedes<br>aegypti GN=AAEL001642 PE=4<br>SV=1            |
| CCG027971.1 | 1566 | 44  | 168 | 1.20732332 | 3.750313217 | 1.635199008  | Up   | 2.92E-13 | 8.09E-13  | AAEL013489-PA OS=Aedes<br>aegypti GN=AAEL013489 PE=4<br>SV=1            |
| CCG002779.1 | 342  | 46  | 168 | 5.77955495 | 17.17248684 | 1.571068671  | Up   | 1.19E-12 | 2.90E-12  | AAEL014732-PA OS=Aedes<br>aegypti GN=AAEL014732 PE=4<br>SV=2            |
| CCG013329.1 | 318  | 54  | 168 | 7.29674739 | 18.46852358 | 1.339743124  | Up   | 2.66E-10 | 5.60E-10  | AAEL012697-PA OS=Aedes<br>aegypti GN=AAEL012697 PE=4<br>SV=1            |
| CCG007676.1 | 948  | 60  | 168 | 2.71960346 | 6.195137656 | 1.187740031  | Up   | 8.71E-09 | 1.74E-08  | AAEL000264-PA OS=Aedes<br>aegypti GN=AAEL000264 PE=4<br>SV=1            |
| CCG023658.1 | 819  | 61  | 168 | 3.200432   | 7.170928569 | 1.163893289  | Up   | 1.49E-08 | 2.95E-08  | AAEL002318-PA OS=Aedes<br>aegypti GN=AAEL002318 PE=4<br>SV=1            |
| CCG012589.1 | 1240 | 62  | 168 | 2.14848673 | 4.736282659 | 1.140434316  | Up   | 2.52E-08 | 4.96E-08  | AAEL003692-PA OS=Aedes<br>aegypti GN=AAEL003692 PE=4<br>SV=1            |
| CCG008895.1 | 972  | 66  | 168 | 2.91769803 | 6.042171294 | 1.050236507  | Up   | 1.85E-07 | 3.50E-07  | AAEL001185-PA OS=Aedes<br>aegypti GN=AAEL001185 PE=4<br>SV=1            |
| CCG019087.1 | 495  | 68  | 168 | 5.90291304 | 11.86462727 | 1.007167785  | Up   | 4.69E-07 | 8.76E-07  | AAEL005495-PA (Fragment)<br>OS=Aedes aegypti<br>GN=AAEL005495 PE=4 SV=1 |
| CCG004238.1 | 2898 | 295 | 168 | 4.37407581 | 2.026566769 | -1.109940518 | Down | 3.78E-16 | 1.42E-15  | AAEL007004-PA (Fragment)<br>OS=Aedes aegypti<br>GN=GPRBOS1 PE=4 SV=2    |
| CCG027784.1 | 930  | 312 | 168 | 14.4156529 | 6.315043546 | -1.190771592 | Down | 7.60E-19 | 2.93E-18  | AAEL011624-PA OS=Aedes<br>aegypti GN=AAEL011624 PE=3<br>SV=1            |

|             |      |      |     |            |             |              |      |           |            |                                                                                          |
|-------------|------|------|-----|------------|-------------|--------------|------|-----------|------------|------------------------------------------------------------------------------------------|
| CCG024698.1 | 1167 | 335  | 168 | 12.3349281 | 5.032553983 | -1.293386659 | Down | 1.03E-22  | 4.13E-22   | AAEL014372-PA OS=Aedes aegypti GN=AAEL014372 PE=4 SV=1                                   |
| CCG011123.1 | 2658 | 433  | 168 | 6.99996053 | 2.209552482 | -1.663592588 | Down | 1.95E-41  | 8.76E-41   | -                                                                                        |
| CCG015610.1 | 1248 | 634  | 168 | 21.8291761 | 4.705921873 | -2.213708404 | Down | 2.06E-87  | 1.06E-86   | AAEL012370-PA OS=Aedes aegypti GN=AAEL012370 PE=3 SV=1                                   |
| CCG027943.1 | 3381 | 1015 | 168 | 12.8998168 | 1.737057231 | -2.892633385 | Down | 5.37E-189 | 3.18E-188  | Tyrosine kinase OS=Culex quinquefasciatus GN=CpipJ_CPIJ000270 PE=3 SV=1                  |
| CCG018027.1 | 1547 | 1315 | 168 | 36.5256632 | 3.796373948 | -3.266216458 | Down | 7.72E-276 | 4.81E-275  | AAEL001570-PA (Fragment) OS=Aedes aegypti GN=AAEL001570 PE=4 SV=1                        |
| CCG027352.3 | 1191 | 9    | 169 | 0.32470832 | 4.960494353 | 3.933267639  | Up   | 1.09E-06  | 2.01E-06   | AAEL005905-PA OS=Aedes aegypti GN=AAEL005905 PE=4 SV=1                                   |
| CCG006889.1 | 1083 | 11   | 169 | 0.43644236 | 5.45516969  | 3.643761021  | Up   | 2.67E-07  | 5.04E-07   | AAEL015285-PA OS=Aedes aegypti GN=AAEL015285 PE=4 SV=1                                   |
| CCG008112.1 | 389  | 25   | 169 | 2.76155107 | 15.18752898 | 2.45933645   | Up   | 9.32E-12  | 2.08E-11   | -                                                                                        |
| CCG008233.1 | 315  | 29   | 169 | 3.95594382 | 18.75539293 | 2.245211645  | Up   | 6.66E-13  | 1.69E-12   | AAEL013332-PA OS=Aedes aegypti GN=AAEL013332 PE=4 SV=1                                   |
| CCG003658.1 | 648  | 38   | 169 | 2.51983012 | 9.117204899 | 1.855265127  | Up   | 4.37E-14  | 1.48E-13   | AAEL011057-PA OS=Aedes aegypti GN=AAEL011057 PE=4 SV=1                                   |
| CCG004338.1 | 2148 | 44   | 169 | 0.88019941 | 2.750441701 | 1.643761021  | Up   | 2.14E-13  | 6.15E-13   | AAEL009522-PA OS=Aedes aegypti GN=AAEL009522 PE=4 SV=1                                   |
| CCG000686.1 | 1794 | 276  | 169 | 6.6107284  | 3.293171    | -1.005331817 | Down | 3.80E-13  | 1.02E-12   | AAEL006581-PA OS=Aedes aegypti GN=AAEL006581 PE=4 SV=1                                   |
| CCG002396.1 | 292  | 346  | 169 | 50.9161924 | 20.23270128 | -1.331435588 | Down | 2.06E-24  | 8.32E-24   | -                                                                                        |
| CCG022625.1 | 2355 | 617  | 169 | 11.257888  | 2.508683131 | -2.165934039 | Down | 7.82E-83  | 3.99E-82   | Putative uncharacterized protein OS=Culex quinquefasciatus GN=CpipJ_CPIJ005715 PE=4 SV=1 |
| CCG005597.1 | 261  | 0    | 170 | 0.001      | 22.76975882 | 14.47483139  | Up   | 4.44E-16  | 1.66E-15   | -                                                                                        |
| CCG015386.1 | 642  | 0    | 170 | 0.001      | 9.256864566 | 13.1763079   | Up   | 4.44E-16  | 1.63E-15   | AAEL008029-PA OS=Aedes aegypti GN=AAEL008029 PE=3 SV=1                                   |
| CCG003975.1 | 396  | 1    | 170 | 0.10850943 | 15.00734104 | 7.11170414   | Up   | 0.000587  | 0.00091734 | -                                                                                        |
| CCG024075.1 | 279  | 2    | 170 | 0.30802677 | 21.30074212 | 6.11170414   | Up   | 9.36E-05  | 0.00015334 | -                                                                                        |
| CCG004312.1 | 591  | 3    | 170 | 0.21812048 | 10.05568029 | 5.526741639  | Up   | 5.28E-05  | 8.84E-05   | AAEL010150-PA OS=Aedes aegypti GN=AAEL010150 PE=4 SV=1                                   |



|             |      |      |     |            |             |              |      |          |          |                                                                |
|-------------|------|------|-----|------------|-------------|--------------|------|----------|----------|----------------------------------------------------------------|
| CCG028618.1 | 1080 | 15   | 170 | 0.59680187 | 5.502691714 | 3.204813544  | Up   | 1.48E-08 | 2.92E-08 | AAEL015285-PA OS=Aedes aegypti GN=AAEL015285 PE=4 SV=1         |
| CCG000980.1 | 723  | 42   | 170 | 2.49616716 | 8.219788453 | 1.719386717  | Up   | 1.01E-13 | 3.16E-13 | AAEL012417-PA OS=Aedes aegypti GN=AAEL012417 PE=4 SV=1         |
| CCG020141.1 | 1236 | 61   | 170 | 2.1206746  | 4.808177226 | 1.180966802  | Up   | 8.29E-09 | 1.66E-08 | AAEL002159-PA OS=Aedes aegypti GN=AAEL002159 PE=4 SV=1         |
| CCG017776.1 | 1524 | 66   | 170 | 1.86089402 | 3.899545309 | 1.067310021  | Up   | 1.07E-07 | 2.05E-07 | AAEL015415-PA OS=Aedes aegypti GN=AAEL015415 PE=4 SV=1         |
| CCG025703.1 | 777  | 67   | 170 | 3.70524095 | 7.648529024 | 1.045614949  | Up   | 1.73E-07 | 3.28E-07 | AAEL012823-PA OS=Aedes aegypti GN=AAEL012823 PE=3 SV=1         |
| CCG019223.1 | 825  | 277  | 170 | 14.4274139 | 7.203523699 | -1.002038026 | Down | 3.99E-13 | 1.06E-12 | AAEL001946-PA OS=Aedes aegypti GN=AAEL001946 PE=4 SV=1         |
| CCG015507.2 | 1122 | 652  | 170 | 24.9699349 | 5.296708602 | -2.237024014 | Down | 5.14E-91 | 2.68E-90 | AAEL010027-PA OS=Aedes aegypti GN=AAEL010027 PE=4 SV=1         |
| CCG009694.1 | 561  | 3310 | 170 | 253.529094 | 10.5934172  | -4.580911362 | Down | 0        | 0        | AAEL001683-PA OS=Aedes aegypti GN=AAEL001683 PE=4 SV=1         |
| CCG014323.1 | 582  | 6    | 171 | 0.44298695 | 10.27124627 | 4.535203218  | Up   | 8.38E-06 | 1.47E-05 | AAEL009773-PA OS=Aedes aegypti GN=AAEL009773 PE=4 SV=1         |
| CCG015543.1 | 792  | 8    | 171 | 0.43403772 | 7.547809758 | 4.120165719  | Up   | 2.19E-06 | 3.97E-06 | AAEL006919-PA OS=Aedes aegypti GN=AAEL006919 PE=3 SV=1         |
| CCG008725.1 | 1632 | 32   | 171 | 0.84254382 | 3.662907677 | 2.120165719  | Up   | 1.77E-13 | 5.17E-13 | AAEL013070-PA OS=Aedes aegypti GN=AAEL013070 PE=4 SV=1         |
| CCG011187.2 | 914  | 61   | 171 | 2.86778316 | 6.540334057 | 1.189428381  | Up   | 6.16E-09 | 1.24E-08 | AAEL012608-PA OS=Aedes aegypti GN=AAEL012608 PE=4 SV=1         |
| CCG019956.2 | 2880 | 62   | 171 | 0.9250429  | 2.075647683 | 1.165969408  | Up   | 1.06E-08 | 2.11E-08 | AAEL011911-PA OS=Aedes aegypti GN=AAEL011911 PE=4 SV=1         |
| CCG005811.1 | 1984 | 321  | 171 | 6.95226049 | 3.01303696  | -1.206263768 | Down | 1.03E-19 | 3.99E-19 | AAEL007561-PA OS=Aedes aegypti GN=AAEL007561 PE=4 SV=1         |
| CCG024066.1 | 1948 | 403  | 171 | 8.88952929 | 3.068719368 | -1.53447031  | Down | 1.49E-34 | 6.44E-34 | AAEL012920-PA (Fragment) OS=Aedes aegypti GN=GPRALS3 PE=3 SV=2 |
| CCG024846.1 | 741  | 619  | 171 | 35.8950954 | 8.06729464  | -2.153629881 | Down | 1.67E-82 | 8.52E-82 | AAEL001294-PA OS=Aedes aegypti GN=AAEL001294 PE=4 SV=1         |

|             |       |       |     |            |             |              |      |           |            |                                                                                          |
|-------------|-------|-------|-----|------------|-------------|--------------|------|-----------|------------|------------------------------------------------------------------------------------------|
| CCG005100.1 | 405   | 902   | 171 | 95.7004954 | 14.7601613  | -2.696817905 | Down | 6.07E-156 | 3.47E-155  | Putative uncharacterized protein OS=Culex quinquefasciatus GN=CpipJ_CPIJ004234 PE=4 SV=1 |
| CCG002770.1 | 1131  | 10    | 172 | 0.37992692 | 5.316378077 | 3.806649864  | Up   | 5.43E-07  | 1.01E-06   | AAEL011659-PA OS=Aedes aegypti GN=AAEL011659 PE=4 SV=1                                   |
| CCG018302.2 | 1377  | 20    | 172 | 0.62410653 | 4.366611187 | 2.806649864  | Up   | 3.69E-10  | 7.72E-10   | AAEL002129-PA OS=Aedes aegypti GN=AAEL002129 PE=4 SV=1                                   |
| CCG007920.2 | 2226  | 20    | 172 | 0.38607129 | 2.701178619 | 2.806649864  | Up   | 3.69E-10  | 7.71E-10   | AAEL006864-PA OS=Aedes aegypti GN=AAEL006864 PE=4 SV=1                                   |
| CCG001288.1 | 909   | 46    | 172 | 2.17448602 | 6.614767442 | 1.605016002  | Up   | 3.07E-13  | 8.46E-13   | AAEL009957-PA OS=Aedes aegypti GN=AAEL009957 PE=4 SV=1                                   |
| CCG024695.1 | 13347 | 674   | 172 | 2.16989594 | 0.450500008 | -2.268026823 | Down | 1.25E-95  | 6.55E-95   | AAEL009216-PA (Fragment) OS=Aedes aegypti GN=AAEL009216 PE=4 SV=1                        |
| CCG006472.1 | 4413  | 4211  | 172 | 41.0028444 | 1.362525177 | -4.911369202 | Down | 0         | 0          | r-box/in protein OS=Culex quinquefasciatus GN=CpipJ_CPIJ011369 PE=4 SV=1                 |
| CCG012363.1 | 426   | 15880 | 172 | 1601.7826  | 14.1146094  | -6.826345334 | Down | 0         | 0          | AAEL004249-PA OS=Aedes aegypti GN=AAEL004249 PE=4 SV=1                                   |
| CCG020442.1 | 544   | 0     | 173 | 0.001      | 11.11724611 | 13.44051184  | Up   | 4.44E-16  | 1.63E-15   | Histone H2B OS=Aedes aegypti GN=AAEL015682 PE=3 SV=1                                     |
| CCG022130.1 | 1578  | 0     | 173 | 0.001      | 3.832561395 | 11.90409319  | Up   | 4.44E-16  | 1.63E-15   | Alkaline phosphatase OS=Culex quinquefasciatus GN=CpipJ_CPIJ001263 PE=3 SV=1             |
| CCG008249.1 | 426   | 2     | 173 | 0.20173584 | 14.19667108 | 6.136941431  | Up   | 9.36E-05  | 0.00015324 | -                                                                                        |
| CCG006249.1 | 1596  | 10    | 173 | 0.26923393 | 3.789337019 | 3.815013337  | Up   | 5.43E-07  | 1.01E-06   | AAEL003447-PA OS=Aedes aegypti GN=AAEL003447 PE=4 SV=1                                   |
| CCG028299.1 | 857   | 20    | 173 | 1.00279427 | 7.056921682 | 2.815013337  | Up   | 3.69E-10  | 7.71E-10   | -                                                                                        |
| CCG014227.1 | 417   | 24    | 173 | 2.47307825 | 14.50307406 | 2.551978931  | Up   | 1.93E-11  | 4.23E-11   | AAEL003874-PA OS=Aedes aegypti GN=AAEL003874 PE=4 SV=1                                   |
| CCG018779.1 | 1008  | 26    | 173 | 1.10834633 | 5.999783613 | 2.436501713  | Up   | 4.60E-12  | 1.05E-11   | ETS transcription factor E74B OS=Aedes aegypti GN=E74B PE=2 SV=1                         |
| CCG016758.1 | 762   | 26    | 173 | 1.46615892 | 7.936721629 | 2.436501713  | Up   | 4.60E-12  | 1.05E-11   | AAEL009164-PA OS=Aedes aegypti GN=AAEL009164 PE=4 SV=1                                   |

|             |      |      |     |            |             |              |      |           |            |                                                                                       |
|-------------|------|------|-----|------------|-------------|--------------|------|-----------|------------|---------------------------------------------------------------------------------------|
| CCG013159.1 | 1989 | 38   | 173 | 0.82094013 | 3.04061432  | 1.889013918  | Up   | 4.26E-14  | 1.45E-13   | Putative uncharacterized protein OS=Tribolium castaneum GN=TcasGA2_TC010973 PE=4 SV=1 |
| CCG022852.1 | 540  | 42   | 173 | 3.34209047 | 11.19959608 | 1.744624009  | Up   | 8.44E-14  | 2.70E-13   | AAEL005225-PA OS=Aedes aegypti GN=AAEL005225 PE=4 SV=1                                |
| CCG023259.1 | 1203 | 0    | 174 | 0.001      | 5.056309359 | 12.30386902  | Up   | 4.44E-16  | 1.63E-15   | AAEL007000-PA OS=Aedes aegypti GN=AAEL007000 PE=4 SV=1                                |
| CCG001260.1 | 1188 | 15   | 174 | 0.54254715 | 5.120151648 | 3.238366104  | Up   | 1.48E-08  | 2.93E-08   | AAEL004244-PA OS=Aedes aegypti GN=AAEL004244 PE=4 SV=1                                |
| CCG000260.1 | 1164 | 35   | 174 | 1.29204528 | 5.225721786 | 2.015973683  | Up   | 6.39E-14  | 2.11E-13   | AAEL010576-PA OS=Aedes aegypti GN=AAEL010576 PE=4 SV=1                                |
| CCG023620.1 | 1954 | 39   | 174 | 0.85763544 | 3.112968351 | 1.859854481  | Up   | 7.35E-14  | 2.38E-13   | AAEL014628-PA OS=Aedes aegypti GN=AAEL014628 PE=4 SV=1                                |
| CCG025074.1 | 1053 | 56   | 174 | 2.28519006 | 5.776581347 | 1.337901778  | Up   | 1.33E-10  | 2.83E-10   | AAEL009581-PA OS=Aedes aegypti GN=AAEL009581 PE=4 SV=1                                |
| CCG026410.1 | 498  | 349  | 174 | 30.1133281 | 12.21433767 | -1.301826527 | Down | 8.08E-24  | 3.25E-23   | Mitochondrial phosphate carrier protein OS=Aedes aegypti PE=2 SV=1                    |
| CCG026490.1 | 497  | 388  | 174 | 33.5457888 | 12.2389138  | -1.454656143 | Down | 6.83E-31  | 2.89E-30   | -                                                                                     |
| CCG003442.1 | 693  | 666  | 174 | 41.2955891 | 8.777402826 | -2.234121667 | Down | 8.81E-93  | 4.60E-92   | AAEL012858-PA OS=Aedes aegypti GN=AAEL012858 PE=4 SV=1                                |
| CCG026797.1 | 373  | 763  | 174 | 87.8978754 | 16.30761437 | -2.430282547 | Down | 2.17E-117 | 1.18E-116  | AAEL003837-PA OS=Aedes aegypti GN=AAEL003837 PE=4 SV=1                                |
| CCG004124.1 | 1931 | 802  | 174 | 17.8465703 | 3.15004669  | -2.502201727 | Down | 1.41E-127 | 7.80E-127  | AAEL003476-PA OS=Aedes aegypti GN=AAEL003476 PE=4 SV=1                                |
| CCG020305.1 | 1920 | 1426 | 174 | 31.91398   | 3.168093832 | -3.332501567 | Down | 1.00E-304 | 6.32E-304  | AAEL002376-PA (Fragment) OS=Aedes aegypti GN=AAEL002376 PE=4 SV=2                     |
| CCG026159.1 | 753  | 2    | 175 | 0.11412944 | 8.124433513 | 6.153524316  | Up   | 9.36E-05  | 0.00015329 | AAEL015464-PA OS=Aedes aegypti GN=AAEL015464 PE=3 SV=1                                |
| CCG010749.1 | 1725 | 2    | 175 | 0.04981998 | 3.546491846 | 6.153524316  | Up   | 9.36E-05  | 0.00015351 | Putative salivary secreted protein 62k-3 OS=Aedes albopictus PE=2 SV=1                |

|             |      |      |     |            |             |              |      |           |           |                                                                                          |
|-------------|------|------|-----|------------|-------------|--------------|------|-----------|-----------|------------------------------------------------------------------------------------------|
| CCG023964.1 | 882  | 8    | 175 | 0.38974816 | 6.936166026 | 4.153524316  | Up   | 2.19E-06  | 3.96E-06  | AAEL002232-PA OS=Aedes aegypti GN=AAEL002232 PE=4 SV=1                                   |
| CCG025169.1 | 1247 | 10   | 175 | 0.34458488 | 4.905932987 | 3.831596221  | Up   | 5.43E-07  | 1.01E-06  | Putative uncharacterized protein OS=Culex quinquefasciatus GN=CpipJ_CPIJ016173 PE=4 SV=1 |
| CCG006707.1 | 841  | 15   | 175 | 0.7664043  | 7.274314429 | 3.24663372   | Up   | 1.48E-08  | 2.93E-08  | AAEL008962-PA OS=Aedes aegypti GN=AAEL008962 PE=4 SV=1                                   |
| CCG010220.1 | 672  | 17   | 175 | 1.08703198 | 9.103717909 | 3.066061474  | Up   | 3.39E-09  | 6.90E-09  | AAEL011868-PA OS=Aedes aegypti GN=AAEL011868 PE=4 SV=1                                   |
| CCG021339.1 | 1245 | 31   | 175 | 1.06992913 | 4.913814004 | 2.199328005  | Up   | 2.40E-13  | 6.76E-13  | AAEL005268-PA OS=Aedes aegypti GN=AAEL005268 PE=4 SV=1                                   |
| CCG023963.3 | 1398 | 40   | 175 | 1.22946308 | 4.376036077 | 1.831596221  | Up   | 6.91E-14  | 2.25E-13  | AAEL005084-PA OS=Aedes aegypti GN=AAEL005084 PE=4 SV=1                                   |
| CCG007467.1 | 1314 | 54   | 175 | 1.7658795  | 4.655782675 | 1.398636813  | Up   | 2.69E-11  | 5.86E-11  | AAEL003781-PA OS=Aedes aegypti GN=AAEL003781 PE=3 SV=1                                   |
| CCG027672.1 | 648  | 55   | 175 | 3.64712254 | 9.440892647 | 1.372164602  | Up   | 5.12E-11  | 1.10E-10  | AAEL010620-PA OS=Aedes aegypti GN=AAEL010620 PE=4 SV=1                                   |
| CCG019965.1 | 914  | 364  | 175 | 17.1126733 | 6.693324327 | -1.354270325 | Down | 3.07E-26  | 1.26E-25  | AAEL009805-PA OS=Aedes aegypti GN=AAEL009805 PE=4 SV=1                                   |
| CCG015986.1 | 1359 | 408  | 175 | 12.900406  | 4.501617686 | -1.518901026 | Down | 1.85E-34  | 7.98E-34  | AAEL010120-PA OS=Aedes aegypti GN=AAEL010120 PE=4 SV=1                                   |
| CCG024772.1 | 416  | 1153 | 175 | 119.096404 | 14.70600585 | -3.017652482 | Down | 5.19E-224 | 3.14E-223 | AAEL002781-PA OS=Aedes aegypti GN=AAEL002781 PE=3 SV=1                                   |
| CCG003246.1 | 1258 | 2125 | 175 | 72.5840112 | 4.863035322 | -3.89972281  | Down | 0         | 0         | -                                                                                        |
| CCG026578.1 | 1083 | 16   | 176 | 0.63482526 | 5.681123464 | 3.161744822  | Up   | 7.09E-09  | 1.42E-08  | AAEL003146-PA OS=Aedes aegypti GN=AAEL003146 PE=4 SV=1                                   |
| CCG003681.1 | 825  | 20   | 176 | 1.04169054 | 7.457765711 | 2.839816728  | Up   | 3.69E-10  | 7.72E-10  | AAEL007259-PA OS=Aedes aegypti GN=AAEL007259 PE=4 SV=1                                   |
| CCG010626.1 | 1182 | 25   | 176 | 0.90883533 | 5.205293327 | 2.517888633  | Up   | 9.32E-12  | 2.08E-11  | Putative uncharacterized protein OS=Culex quinquefasciatus GN=CpipJ_CPIJ008082 PE=4 SV=1 |
| CCG000885.1 | 1275 | 46   | 176 | 1.55028062 | 4.825613107 | 1.638182866  | Up   | 9.70E-14  | 3.05E-13  | N-acetylglucosamine-6-phosphate deacetylase OS=Aedes aegypti GN=AAEL002430 PE=3 SV=1     |

|             |      |      |     |            |             |              |      |           |           |                                                                      |
|-------------|------|------|-----|------------|-------------|--------------|------|-----------|-----------|----------------------------------------------------------------------|
| CCG015781.1 | 870  | 62   | 176 | 3.06221097 | 7.072019209 | 1.207548512  | Up   | 2.40E-09  | 4.90E-09  | AAEL007688-PA OS=Aedes aegypti GN=AAEL007688 PE=4 SV=1               |
| CCG026896.1 | 1092 | 67   | 176 | 2.63642145 | 5.634301018 | 1.095655632  | Up   | 3.32E-08  | 6.49E-08  | AAEL001451-PA OS=Aedes aegypti GN=AAEL001451 PE=4 SV=1               |
| CCG020140.1 | 2054 | 68   | 176 | 1.42256181 | 2.995451174 | 1.074281981  | Up   | 5.43E-08  | 1.05E-07  | AAEL008101-PA OS=Aedes aegypti GN=AAEL008101 PE=4 SV=1               |
| CCG016715.1 | 1692 | 334  | 176 | 8.4822053  | 3.636321934 | -1.22195947  | Down | 7.64E-21  | 3.00E-20  | AAEL014019-PA OS=Aedes aegypti GN=CYP4J17 PE=3 SV=2                  |
| CCG021963.1 | 1068 | 756  | 176 | 30.4167784 | 5.760914524 | -2.400497602 | Down | 1.21E-114 | 6.55E-114 | AAEL010773-PA OS=Aedes aegypti GN=CLIFE10 PE=3 SV=2                  |
| CCG001990.1 | 1575 | 1623 | 176 | 44.2792884 | 3.906448706 | -3.502702462 | Down | 0         | 0         | AAEL003194-PA OS=Aedes aegypti GN=AAEL003194 PE=4 SV=1               |
| CCG009608.1 | 1134 | 8    | 177 | 0.30313746 | 5.456450607 | 4.169918754  | Up   | 2.19E-06  | 3.97E-06  | -                                                                    |
| CCG021718.1 | 360  | 13   | 177 | 1.55168486 | 17.18781941 | 3.469479036  | Up   | 6.34E-08  | 1.23E-07  | Uncharacterized protein OS=Anopheles darlingi GN=AND_13030 PE=4 SV=1 |
| CCG023582.1 | 807  | 13   | 177 | 0.69220142 | 7.667428734 | 3.469479036  | Up   | 6.34E-08  | 1.22E-07  | AAEL012656-PA OS=Aedes aegypti GN=AAEL012656 PE=4 SV=1               |
| CCG018311.1 | 888  | 14   | 177 | 0.67745077 | 6.968034897 | 3.362563832  | Up   | 3.07E-08  | 6.01E-08  | AAEL002232-PA OS=Aedes aegypti GN=AAEL002232 PE=4 SV=1               |
| CCG000738.1 | 967  | 17   | 177 | 0.75541416 | 6.398774549 | 3.082455913  | Up   | 3.39E-09  | 6.90E-09  | AAEL007541-PA OS=Aedes aegypti GN=AAEL007541 PE=4 SV=1               |
| CCG010146.1 | 849  | 18   | 177 | 0.91101911 | 7.288121306 | 2.999993752  | Up   | 1.62E-09  | 3.33E-09  | AAEL012511-PA OS=Aedes aegypti GN=AAEL012511 PE=4 SV=1               |
| CCG011301.1 | 1233 | 20   | 177 | 0.69699488 | 5.018341434 | 2.847990659  | Up   | 3.69E-10  | 7.73E-10  | AAEL010930-PA OS=Aedes aegypti GN=AAEL010930 PE=4 SV=1               |
| CCG002990.1 | 714  | 26   | 177 | 1.56472423 | 8.666127435 | 2.469479036  | Up   | 4.60E-12  | 1.05E-11  | AAEL007714-PA OS=Aedes aegypti GN=AAEL007714 PE=4 SV=1               |
| CCG017261.1 | 1149 | 26   | 177 | 0.97233516 | 5.385217571 | 2.469479036  | Up   | 4.60E-12  | 1.05E-11  | AAEL008028-PA OS=Aedes aegypti GN=AAEL008028 PE=4 SV=1               |
| CCG010374.1 | 981  | 45   | 177 | 1.97108874 | 6.307456665 | 1.678065658  | Up   | 0         | 0         | AAEL006067-PA OS=Aedes aegypti GN=AAEL006067 PE=4 SV=1               |
| CCG023390.1 | 3558 | 49   | 177 | 0.59176981 | 1.739071104 | 1.55520891   | Up   | 4.09E-13  | 1.09E-12  | AAEL001494-PA OS=Aedes aegypti GN=AAEL001494 PE=4 SV=1               |

|             |      |      |     |            |             |              |      |           |           |                                                                                          |
|-------------|------|------|-----|------------|-------------|--------------|------|-----------|-----------|------------------------------------------------------------------------------------------|
| CCG016649.1 | 1002 | 53   | 177 | 2.27285023 | 6.17526446  | 1.441998299  | Up   | 7.08E-12  | 1.59E-11  | AAEL002846-PA OS=Aedes aegypti GN=AAEL002846 PE=4 SV=1                                   |
| CCG017878.1 | 1650 | 354  | 177 | 9.21896124 | 3.75006969  | -1.297686796 | Down | 5.02E-24  | 2.02E-23  | AAEL004258-PA OS=Aedes aegypti GN=AAEL004258 PE=4 SV=1                                   |
| CCG017635.1 | 2196 | 361  | 177 | 7.06378606 | 2.817675314 | -1.325936273 | Down | 3.00E-25  | 1.22E-24  | AAEL014617-PA OS=Aedes aegypti GN=CYP9J28 PE=3 SV=1                                      |
| CCG026590.1 | 876  | 410  | 177 | 20.1114055 | 7.06348743  | -1.509561346 | Down | 2.56E-34  | 1.10E-33  | AGAP008575-PA OS=Anopheles gambiae GN=AGAP008575 PE=4 SV=4                               |
| CCG000884.1 | 2512 | 415  | 177 | 7.09890122 | 2.463222527 | -1.527048772 | Down | 2.74E-35  | 1.19E-34  | GK21210 OS=Drosophila willistoni GN=GK21210 PE=4 SV=1                                    |
| CCG023725.1 | 1329 | 617  | 177 | 19.9490792 | 4.65584273  | -2.099207925 | Down | 1.27E-79  | 6.45E-79  | AAEL002688-PA OS=Aedes aegypti GN=AAEL002688 PE=3 SV=1                                   |
| CCG018575.1 | 1554 | 1131 | 177 | 31.2733397 | 3.981734227 | -2.97346446  | Down | 1.73E-216 | 1.04E-215 | AAEL003568-PA OS=Aedes aegypti GN=AAEL003568 PE=4 SV=1                                   |
| CCG009519.1 | 3699 | 1874 | 177 | 21.7694735 | 1.672780478 | -3.701986484 | Down | 0         | 0         | Homeotic protein span-major OS=Culex quinquefasciatus GN=CpipJ_CPIJ015319 PE=4 SV=1      |
| CCG018750.1 | 1081 | 17   | 178 | 0.67574976 | 5.756311994 | 3.090583794  | Up   | 3.39E-09  | 6.89E-09  | AAEL006871-PA OS=Aedes aegypti GN=AAEL006871 PE=4 SV=1                                   |
| CCG027984.1 | 825  | 23   | 178 | 1.19794412 | 7.542513049 | 2.654484679  | Up   | 4.01E-11  | 8.68E-11  | Putative uncharacterized protein OS=Culex quinquefasciatus GN=CpipJ_CPIJ012744 PE=4 SV=1 |
| CCG020545.1 | 1569 | 26   | 178 | 0.71205424 | 3.965948544 | 2.477606917  | Up   | 4.60E-12  | 1.05E-11  | AAEL008052-PA OS=Aedes aegypti GN=AAEL008052 PE=4 SV=1                                   |
| CCG007511.1 | 834  | 33   | 178 | 1.7002413  | 7.461119023 | 2.133652515  | Up   | 1.31E-13  | 4.01E-13  | AAEL001425-PA OS=Aedes aegypti GN=AAEL001425 PE=4 SV=1                                   |
| CCG004036.1 | 606  | 38   | 178 | 2.69447181 | 10.26827272 | 1.930119121  | Up   | 4.26E-14  | 1.45E-13  | AAEL001382-PA OS=Aedes aegypti GN=AAEL001382 PE=4 SV=1                                   |
| CCG017374.1 | 939  | 40   | 178 | 1.83044663 | 6.626808589 | 1.85611854   | Up   | 6.86E-14  | 2.24E-13  | AAEL010416-PA OS=Aedes aegypti GN=AAEL010416 PE=4 SV=1                                   |
| CCG021503.1 | 873  | 46   | 178 | 2.26415555 | 7.127804428 | 1.654484679  | Up   | 6.39E-14  | 2.11E-13  | AAEL010239-PA OS=Aedes aegypti GN=AAEL010239 PE=4 SV=1                                   |

|             |      |     |     |            |             |              |      |           |           |                                                                                               |
|-------------|------|-----|-----|------------|-------------|--------------|------|-----------|-----------|-----------------------------------------------------------------------------------------------|
| CCG007575.1 | 6042 | 52  | 178 | 0.36981566 | 1.02988634  | 1.477606917  | Up   | 2.54E-12  | 5.98E-12  | Cadherin 69D OS=Culex quinquefasciatus<br>GN=CpipJ_CPIJ002664 PE=4 SV=1                       |
| CCG005421.1 | 4449 | 315 | 178 | 3.04236152 | 1.398645373 | -1.121161384 | Down | 2.13E-17  | 8.11E-17  | AAEL010466-PA (Fragment)<br>OS=Aedes aegypti<br>GN=AAEL010466 PE=4 SV=1                       |
| CCG006480.1 | 1134 | 361 | 178 | 13.6790778 | 5.487278012 | -1.317808392 | Down | 5.03E-25  | 2.05E-24  | vesicular monoamine transporter<br>OS=Culex quinquefasciatus<br>GN=CpipJ_CPIJ007766 PE=4 SV=1 |
| CCG014472.1 | 2010 | 394 | 178 | 8.4229231  | 3.095807595 | -1.444005185 | Down | 5.14E-31  | 2.18E-30  | AAEL000915-PA OS=Aedes aegypti<br>GN=AAEL000915 PE=4 SV=1                                     |
| CCG012224.1 | 970  | 738 | 178 | 32.6924373 | 6.415023985 | -2.349430371 | Down | 4.08E-109 | 2.19E-108 | AAEL009295-PA OS=Aedes aegypti<br>GN=AAEL009295 PE=4 SV=1                                     |
| CCG028503.1 | 2752 | 919 | 178 | 14.3492682 | 2.261109471 | -2.665874417 | Down | 7.95E-157 | 4.55E-156 | AAEL000590-PA OS=Aedes aegypti<br>GN=DNR1 PE=4 SV=1                                           |
| CCG011206.2 | 1005 | 18  | 179 | 0.76960719 | 6.226399545 | 3.01620398   | Up   | 1.62E-09  | 3.33E-09  | AAEL013286-PA (Fragment)<br>OS=Aedes aegypti<br>GN=AAEL013286 PE=4 SV=1                       |
| CCG008265.1 | 804  | 27  | 179 | 1.44301348 | 7.782999431 | 2.431241479  | Up   | 2.28E-12  | 5.41E-12  | AAEL009778-PA OS=Aedes aegypti<br>GN=AAEL009778 PE=4 SV=1                                     |
| CCG007031.1 | 1888 | 27  | 179 | 0.61450362 | 3.31437052  | 2.431241479  | Up   | 2.28E-12  | 5.41E-12  | AAEL003034-PA OS=Aedes aegypti<br>GN=AAEL003034 PE=4 SV=1                                     |
| CCG001657.1 | 1254 | 32  | 179 | 1.09651635 | 4.990057051 | 2.186128981  | Up   | 1.77E-13  | 5.17E-13  | AAEL010376-PA OS=Aedes aegypti<br>GN=AAEL010376 PE=4 SV=1                                     |
| CCG009082.1 | 1131 | 48  | 179 | 1.82364921 | 5.532742301 | 1.60116648   | Up   | 1.52E-13  | 4.52E-13  | AAEL006666-PA OS=Aedes aegypti<br>GN=AAEL006666 PE=4 SV=1                                     |
| CCG020728.1 | 492  | 59  | 179 | 5.15287468 | 12.71856005 | 1.303485932  | Up   | 1.69E-10  | 3.59E-10  | Uncharacterized protein<br>OS=Anopheles darlingi<br>GN=AND_20430 PE=4 SV=1                    |
| CCG004931.1 | 1654 | 70  | 179 | 1.81854983 | 3.783271791 | 1.056845964  | Up   | 6.27E-08  | 1.22E-07  | AAEL012038-PA OS=Aedes aegypti<br>GN=AAEL012038 PE=4 SV=1                                     |
| CCG021702.1 | 2966 | 586 | 179 | 8.48963738 | 2.109754397 | -2.008627873 | Down | 1.54E-71  | 7.65E-71  | Uncharacterized protein<br>OS=Anopheles darlingi<br>GN=AND_14085 PE=4 SV=1                    |

|             |      |      |     |            |             |              |      |           |           |                                                                                                                   |
|-------------|------|------|-----|------------|-------------|--------------|------|-----------|-----------|-------------------------------------------------------------------------------------------------------------------|
| CCG002522.1 | 1620 | 713  | 179 | 18.9119881 | 3.862673792 | -2.291629285 | Down | 2.40E-102 | 1.28E-101 | AAEL000464-PA OS=Aedes aegypti GN=AAEL000464 PE=4 SV=1                                                            |
| CCG000500.1 | 723  | 2    | 180 | 0.1188651  | 8.70330542  | 6.1941663    | Up   | 9.36E-05  | 0.0001536 | AAEL003987-PA OS=Aedes aegypti GN=AAEL003987 PE=4 SV=1                                                            |
| CCG009407.1 | 1128 | 3    | 180 | 0.11428121 | 5.578448421 | 5.609203799  | Up   | 5.28E-05  | 8.86E-05  | AAEL002291-PA OS=Aedes aegypti GN=AAEL002291 PE=4 SV=1                                                            |
| CCG008621.1 | 1032 | 9    | 180 | 0.37473606 | 6.097373856 | 4.024241299  | Up   | 1.09E-06  | 2.01E-06  | AAEL007257-PA OS=Aedes aegypti GN=AAEL007257 PE=4 SV=1                                                            |
| CCG014722.1 | 2739 | 16   | 180 | 0.25100977 | 2.297367586 | 3.1941663    | Up   | 7.09E-09  | 1.42E-08  | AAEL012906-PA OS=Aedes aegypti GN=AAEL012906 PE=4 SV=1                                                            |
| CCG022262.1 | 446  | 32   | 180 | 3.08303029 | 14.10872157 | 2.1941663    | Up   | 1.77E-13  | 5.16E-13  | Anti-microbial peptide cecropin OS=Anopheles darlingi PE=3 SV=1                                                   |
| CCG000843.2 | 873  | 46   | 180 | 2.26415555 | 7.207892118 | 1.670604344  | Up   | 4.82E-14  | 1.63E-13  | Cleavage and polyadenylation specificity factor subunit 4 OS=Culex quinquefasciatus GN=CpipJ_CPIJ009192 PE=4 SV=1 |
| CCG017971.1 | 2310 | 582  | 180 | 10.8261409 | 2.724021567 | -1.990709043 | Down | 3.07E-70  | 1.52E-69  | AAEL004090-PA (Fragment) OS=Aedes aegypti GN=AAEL004090 PE=4 SV=1                                                 |
| CCG007112.1 | 1617 | 618  | 180 | 16.4225702 | 3.891459381 | -2.077296728 | Down | 1.09E-78  | 5.54E-78  | AAEL005206-PA OS=Aedes aegypti GN=AAEL005206 PE=4 SV=1                                                            |
| CCG021358.1 | 1656 | 1010 | 180 | 26.2073864 | 3.799812693 | -2.785973277 | Down | 1.06E-180 | 6.24E-180 | AAEL011766-PA OS=Aedes aegypti GN=AAEL011766 PE=4 SV=1                                                            |
| CCG024653.1 | 1626 | 26   | 181 | 0.68709293 | 3.891419493 | 2.501719373  | Up   | 4.60E-12  | 1.05E-11  | Putative uncharacterized protein OS=Culex quinquefasciatus GN=CpipJ_CPIJ002640 PE=4 SV=1                          |
| CCG018472.1 | 1854 | 28   | 181 | 0.64894961 | 3.412863051 | 2.394804169  | Up   | 1.17E-12  | 2.85E-12  | Putative uncharacterized protein OS=Culex quinquefasciatus GN=CpipJ_CPIJ002893 PE=4 SV=1                          |
| CCG005540.1 | 1461 | 43   | 181 | 1.26468076 | 4.330902187 | 1.775894336  | Up   | 8.53E-14  | 2.71E-13  | AAEL001870-PA OS=Aedes aegypti GN=AAEL001870 PE=4 SV=1                                                            |
| CCG007056.1 | 1195 | 49   | 181 | 1.76193891 | 5.294935645 | 1.587449247  | Up   | 8.46E-14  | 2.70E-13  | AAEL006548-PA OS=Aedes aegypti GN=AAEL006548 PE=4 SV=1                                                            |
| CCG024257.1 | 1959 | 49   | 181 | 1.07479173 | 3.229937772 | 1.587449247  | Up   | 8.46E-14  | 2.70E-13  | AAEL004194-PA OS=Aedes aegypti GN=AAEL004194 PE=4 SV=1                                                            |



|             |      |      |     |            |             |              |      |          |          |                                                                              |
|-------------|------|------|-----|------------|-------------|--------------|------|----------|----------|------------------------------------------------------------------------------|
| CCG013042.1 | 417  | 55   | 181 | 5.66747099 | 15.17373644 | 1.420799377  | Up   | 6.96E-12 | 1.56E-11 | AAEL008223-PA OS=Aedes aegypti GN=AAEL008223 PE=4 SV=1                       |
| CCG016953.1 | 1107 | 60   | 181 | 2.32898291 | 5.715851938 | 1.295268495  | Up   | 1.64E-10 | 3.48E-10 | AAEL002853-PA OS=Aedes aegypti GN=AAEL002853 PE=4 SV=1                       |
| CCG027649.1 | 903  | 65   | 181 | 3.09305952 | 7.007140748 | 1.179791278  | Up   | 2.80E-09 | 5.70E-09 | AAEL007321-PA OS=Aedes aegypti GN=AAEL007321 PE=4 SV=1                       |
| CCG017295.1 | 4509 | 70   | 181 | 0.66708393 | 1.403292991 | 1.072876074  | Up   | 3.63E-08 | 7.08E-08 | AAEL015233-PA OS=Aedes aegypti GN=AAEL015233 PE=4 SV=1                       |
| CCG016816.1 | 1650 | 521  | 181 | 13.5680192 | 3.834817028 | -1.822980471 | Down | 3.99E-56 | 1.90E-55 | AAEL008650-PA OS=Aedes aegypti GN=AAEL008650 PE=4 SV=1                       |
| CCG020116.1 | 8794 | 1491 | 181 | 7.28540759 | 0.719518774 | -3.339905451 | Down | 0        | 0        | Retrotransposon ninja DNA (Fragment) OS=Drosophila simulans GN=pol PE=4 SV=1 |
| CCG024120.1 | 572  | 0    | 182 | 0.001      | 11.12308806 | 13.44126975  | Up   | 4.44E-16 | 1.66E-15 | AAEL013741-PA OS=Aedes aegypti GN=AAEL013741 PE=4 SV=1                       |
| CCG011502.1 | 603  | 0    | 182 | 0.001      | 10.55125435 | 13.3651269   | Up   | 4.44E-16 | 1.64E-15 | AAEL007855-PA OS=Aedes aegypti GN=AAEL007855 PE=4 SV=1                       |
| CCG024177.1 | 839  | 11   | 182 | 0.56336958 | 7.583321064 | 3.750676225  | Up   | 2.67E-07 | 5.03E-07 | AAEL009284-PA OS=Aedes aegypti GN=AAEL009284 PE=4 SV=1                       |
| CCG023332.1 | 690  | 13   | 182 | 0.80957471 | 9.220878801 | 3.509668126  | Up   | 6.34E-08 | 1.23E-07 | AAEL011580-PA OS=Aedes aegypti GN=AAEL011580 PE=4 SV=1                       |
| CCG015261.1 | 1119 | 19   | 182 | 0.72960229 | 5.68579658  | 2.962180331  | Up   | 7.73E-10 | 1.61E-09 | AAEL004955-PA OS=Aedes aegypti GN=AAEL004955 PE=4 SV=1                       |
| CCG028027.1 | 2208 | 35   | 182 | 0.68113257 | 2.881524625 | 2.080824827  | Up   | 6.39E-14 | 2.11E-13 | AAEL000425-PA OS=Aedes aegypti GN=AAEL000425 PE=4 SV=1                       |
| CCG019451.1 | 2595 | 56   | 182 | 0.92728522 | 2.451794363 | 1.402752922  | Up   | 9.68E-12 | 2.16E-11 | AAEL003726-PA OS=Aedes aegypti GN=AAEL003726 PE=4 SV=1                       |
| CCG013930.1 | 327  | 56   | 182 | 7.35873131 | 19.45690022 | 1.402752922  | Up   | 9.68E-12 | 2.16E-11 | AGAP001351-PA OS=Anopheles gambiae GN=AgaP_AGAP001351 PE=4 SV=3              |
| CCG019415.1 | 2148 | 65   | 182 | 1.30029458 | 2.96201414  | 1.187740031  | Up   | 2.08E-09 | 4.26E-09 | AAEL015386-PA OS=Aedes aegypti GN=AAEL015386 PE=4 SV=1                       |
| CCG023885.1 | 3147 | 310  | 182 | 4.23279877 | 2.021737011 | -1.066016561 | Down | 6.53E-16 | 2.39E-15 | AAEL001804-PA OS=Aedes aegypti GN=AAEL001804 PE=3 SV=1                       |

|             |      |      |     |            |             |              |      |           |           |                                                                                    |
|-------------|------|------|-----|------------|-------------|--------------|------|-----------|-----------|------------------------------------------------------------------------------------|
| CCG019950.1 | 1178 | 337  | 182 | 12.2927    | 5.401024085 | -1.186496937 | Down | 4.00E-20  | 1.56E-19  | AAEL014909-PA OS=Aedes aegypti GN=AAEL014909 PE=4 SV=1                             |
| CCG021921.1 | 7231 | 353  | 182 | 2.09767893 | 0.879879183 | -1.253416529 | Down | 8.93E-23  | 3.57E-22  | Tyrosine kinase OS=Culex quinquefasciatus GN=CpipJ_CPIJ003860 PE=4 SV=1            |
| CCG009654.1 | 3144 | 698  | 182 | 9.53971843 | 2.023666149 | -2.236975382 | Down | 2.64E-97  | 1.39E-96  | AAEL005321-PA OS=Aedes aegypti GN=AAEL005321 PE=4 SV=1                             |
| CCG005408.1 | 1947 | 1497 | 182 | 33.038363  | 3.267799883 | -3.337750662 | Down | 0         | 0         | AAEL007191-PA OS=Aedes aegypti GN=AAEL007191 PE=2 SV=1                             |
| CCG026615.1 | 750  | 0    | 183 | 0.001      | 8.529819532 | 13.0582995   | Up   | 4.44E-16  | 1.65E-15  | AAEL000499-PA OS=Aedes aegypti GN=SPZ1A PE=4 SV=1                                  |
| CCG007734.1 | 669  | 10   | 183 | 0.64229798 | 9.562577951 | 3.896084947  | Up   | 5.43E-07  | 1.01E-06  | AAEL004787-PA OS=Aedes aegypti GN=AAEL004787 PE=4 SV=1                             |
| CCG028545.1 | 411  | 12   | 183 | 1.25459079 | 15.56536411 | 3.633050541  | Up   | 1.30E-07  | 2.49E-07  | AAEL009177-PA OS=Aedes aegypti GN=AAEL009177 PE=4 SV=1                             |
| CCG020097.1 | 954  | 18   | 183 | 0.81074971 | 6.705832966 | 3.048088041  | Up   | 1.62E-09  | 3.33E-09  | AAEL001749-PA OS=Aedes aegypti GN=AAEL001749 PE=4 SV=1                             |
| CCG025731.1 | 1239 | 59   | 183 | 2.04617784 | 5.163329015 | 1.335369993  | Up   | 4.72E-11  | 1.02E-10  | Argininosuccinate synthase OS=Culex quinquefasciatus GN=CpipJ_CPIJ012882 PE=3 SV=1 |
| CCG017136.1 | 290  | 74   | 183 | 10.9646909 | 22.0598781  | 1.008559676  | Up   | 1.39E-07  | 2.65E-07  | -                                                                                  |
| CCG017683.1 | 3574 | 309  | 183 | 3.71506659 | 1.789973321 | -1.053449986 | Down | 1.37E-15  | 5.00E-15  | AAEL005918-PA OS=Aedes aegypti GN=AAEL005918 PE=3 SV=1                             |
| CCG005321.1 | 1749 | 355  | 183 | 8.72170142 | 3.657727072 | -1.253662172 | Down | 6.67E-23  | 2.67E-22  | AGAP013390-PA OS=Anopheles gambiae GN=AgaP_AGAP013390 PE=4 SV=1                    |
| CCG016819.1 | 4293 | 388  | 183 | 3.8835912  | 1.490185104 | -1.3818998   | Down | 1.08E-28  | 4.53E-28  | AAEL004880-PA (Fragment) OS=Aedes aegypti GN=AAEL004880 PE=4 SV=1                  |
| CCG010232.1 | 917  | 860  | 183 | 40.2987696 | 6.976406379 | -2.530179807 | Down | 1.94E-138 | 1.09E-137 | AAEL001466-PA OS=Aedes aegypti GN=AAEL001466 PE=4 SV=1                             |
| CCG020154.1 | 2445 | 1031 | 183 | 18.1193441 | 2.616509059 | -2.791815575 | Down | 7.80E-185 | 4.59E-184 | AAEL010028-PA OS=Aedes aegypti GN=AAEL010028 PE=3 SV=1                             |
| CCG018694.1 | 1436 | 2191 | 183 | 65.5617608 | 4.45498931  | -3.879360727 | Down | 0         | 0         | -                                                                                  |

|             |      |      |     |            |             |              |      |          |          |                                                                                 |
|-------------|------|------|-----|------------|-------------|--------------|------|----------|----------|---------------------------------------------------------------------------------|
| CCG024592.1 | 470  | 2411 | 183 | 220.425596 | 13.61141415 | -4.017402894 | Down | 0        | 0        | Putative salivary odorant binding protein 1 OS=Culex quinquefasciatus PE=2 SV=1 |
| CCG003513.1 | 1155 | 6    | 184 | 0.2232194  | 5.569110759 | 4.640912659  | Up   | 8.38E-06 | 1.48E-05 | AAEL004909-PA OS=Aedes aegypti GN=AAEL004909 PE=4 SV=1                          |
| CCG014254.1 | 1910 | 19   | 184 | 0.42744762 | 3.367708338 | 2.977947646  | Up   | 7.73E-10 | 1.60E-09 | AAEL008536-PA OS=Aedes aegypti GN=AAEL008536 PE=4 SV=1                          |
| CCG021217.1 | 541  | 28   | 184 | 2.2239419  | 11.88969118 | 2.418520238  | Up   | 1.17E-12 | 2.86E-12 | AAEL004355-PA OS=Aedes aegypti GN=AAEL004355 PE=4 SV=1                          |
| CCG000535.1 | 2556 | 68   | 184 | 1.14316978 | 2.516558265 | 1.138412319  | Up   | 5.71E-09 | 1.15E-08 | AAEL013903-PB OS=Aedes aegypti GN=AAEL013903 PE=4 SV=1                          |
| CCG000437.1 | 673  | 346  | 184 | 22.0914237 | 9.557686369 | -1.208753068 | Down | 3.41E-21 | 1.34E-20 | AAEL013852-PA OS=Aedes aegypti GN=ABDA_AEDAE_b PE=2 SV=2                        |
| CCG023060.1 | 1842 | 483  | 184 | 11.2673083 | 3.49203199  | -1.690004219 | Down | 4.86E-47 | 2.24E-46 | Transporter OS=Aedes aegypti GN=AAEL003860 PE=3 SV=1                            |
| CCG006822.1 | 2766 | 506  | 184 | 7.86069621 | 2.325496358 | -1.757118415 | Down | 6.65E-52 | 3.13E-51 | AAEL007535-PA OS=Aedes aegypti GN=AAEL007535 PE=4 SV=1                          |
| CCG026080.1 | 489  | 14   | 185 | 1.23021735 | 13.22552393 | 3.426339742  | Up   | 3.07E-08 | 6.00E-08 | AAEL007250-PA OS=Aedes aegypti GN=AAEL007250 PE=4 SV=1                          |
| CCG001916.1 | 957  | 17   | 185 | 0.76330772 | 6.757869595 | 3.146231823  | Up   | 3.39E-09 | 6.89E-09 | AAEL011648-PA OS=Aedes aegypti GN=AAEL011648 PE=3 SV=1                          |
| CCG011346.1 | 1306 | 17   | 185 | 0.55933039 | 4.951976419 | 3.146231823  | Up   | 3.39E-09 | 6.88E-09 | AGAP005368-PA OS=Anopheles gambiae GN=AGAP005368 PE=4 SV=2                      |
| CCG007270.1 | 698  | 23   | 185 | 1.41590816 | 9.265445849 | 2.710132708  | Up   | 4.01E-11 | 8.68E-11 | AAEL012938-PA OS=Aedes aegypti GN=AAEL012938 PE=4 SV=1                          |
| CCG022065.1 | 1666 | 46   | 185 | 1.18643925 | 3.88192149  | 1.710132708  | Up   | 3.57E-14 | 1.24E-13 | AAEL004604-PA (Fragment) OS=Aedes aegypti GN=AAEL004604 PE=4 SV=1               |
| CCG027474.1 | 824  | 57   | 185 | 2.97242096 | 7.848642236 | 1.40080465   | Up   | 6.90E-12 | 1.55E-11 | AAEL008486-PA OS=Aedes aegypti GN=AAEL008486 PE=4 SV=1                          |
| CCG000811.1 | 769  | 65   | 185 | 3.63203218 | 8.40998856  | 1.211326851  | Up   | 8.52E-10 | 1.76E-09 | -                                                                               |
| CCG027238.1 | 288  | 72   | 185 | 10.7424337 | 22.45583751 | 1.063769663  | Up   | 3.19E-08 | 6.24E-08 | AAEL007695-PA OS=Aedes aegypti GN=AAEL007695 PE=4 SV=1                          |

|             |      |      |     |            |             |              |      |          |            |                                                                                          |
|-------------|------|------|-----|------------|-------------|--------------|------|----------|------------|------------------------------------------------------------------------------------------|
| CCG019618.1 | 1702 | 74   | 185 | 1.86824933 | 3.799812693 | 1.024241299  | Up   | 8.19E-08 | 1.58E-07   | AAEL005374-PA OS=Aedes aegypti GN=AAEL003374 PE=4 SV=1                                   |
| CCG022988.1 | 7731 | 335  | 185 | 1.86196625 | 0.836538766 | -1.154322621 | Down | 3.23E-19 | 1.25E-18   | AAEL008384-PA OS=Aedes aegypti GN=AAEL008384 PE=3 SV=1                                   |
| CCG005288.1 | 387  | 4054 | 185 | 450.127401 | 16.71132094 | -4.751435709 | Down | 0        | 0          | AAEL002185-PA OS=Aedes aegypti GN=AAEL002185 PE=4 SV=1                                   |
| CCG005147.1 | 1662 | 1    | 186 | 0.02585423 | 3.912298123 | 7.241472015  | Up   | 0.000587 | 0.00091774 | AAEL006333-PA OS=Aedes aegypti GN=AAEL006333 PE=3 SV=1                                   |
| CCG011089.1 | 1107 | 1    | 186 | 0.03881638 | 5.873748401 | 7.241472015  | Up   | 0.000587 | 0.00091609 | FXa-directed anticoagulant OS=Aedes albopictus PE=2 SV=1                                 |
| CCG020249.1 | 424  | 6    | 186 | 0.60806228 | 15.33547047 | 4.656509514  | Up   | 8.38E-06 | 1.47E-05   | AAEL006972-PA OS=Aedes aegypti GN=AAEL006972 PE=4 SV=1                                   |
| CCG010067.1 | 681  | 14   | 186 | 0.88337193 | 9.548075594 | 3.434117093  | Up   | 3.07E-08 | 6.00E-08   | AAEL006501-PA OS=Aedes aegypti GN=AAEL006501 PE=4 SV=1                                   |
| CCG022149.1 | 742  | 36   | 186 | 2.08478497 | 8.763125983 | 2.071547013  | Up   | 6.13E-14 | 2.03E-13   | Putative uncharacterized protein OS=Culex quinquefasciatus GN=CpipJ_CPIJ005826 PE=4 SV=1 |
| CCG003470.1 | 916  | 43   | 186 | 2.0171382  | 7.098514716 | 1.81520726   | Up   | 8.46E-14 | 2.71E-13   | AGAP005314-PA OS=Anopheles gambiae GN=AGAP005314 PE=4 SV=2                               |
| CCG005504.1 | 1503 | 47   | 186 | 1.34369762 | 4.326173972 | 1.686883163  | Up   | 0        | 0          | AAEL007564-PA OS=Aedes aegypti GN=AAEL007564 PE=4 SV=1                                   |
| CCG014871.1 | 2519 | 53   | 186 | 0.90408731 | 2.581278078 | 1.51355156   | Up   | 2.96E-13 | 8.19E-13   | AAEL014398-PA OS=Aedes aegypti GN=AAEL014398 PE=4 SV=1                                   |
| CCG020595.1 | 2921 | 68   | 186 | 1.00032248 | 2.226032003 | 1.154009174  | Up   | 3.21E-09 | 6.53E-09   | AAEL010494-PA OS=Aedes aegypti GN=AAEL010494 PE=4 SV=1                                   |
| CCG012462.1 | 1545 | 633  | 186 | 17.6050757 | 4.208569242 | -2.064589675 | Down | 6.37E-80 | 3.24E-79   | AAEL001770-PA OS=Aedes aegypti GN=AAEL001770 PE=4 SV=1                                   |
| CCG026030.1 | 1815 | 658  | 186 | 15.5780085 | 3.582501091 | -2.120471759 | Down | 6.91E-86 | 3.56E-85   | AAEL008559-PA OS=Aedes aegypti GN=AAEL008559 PE=3 SV=1                                   |
| CCG000332.1 | 837  | 0    | 187 | 0.001      | 7.81027211  | 12.9311571   | Up   | 4.44E-16 | 1.64E-15   | AAEL005972-PA OS=Aedes aegypti GN=AAEL005972 PE=4 SV=1                                   |
| CCG022376.1 | 971  | 5    | 187 | 0.22126537 | 6.732438472 | 4.927279569  | Up   | 1.59E-05 | 2.76E-05   | Putative uncharacterized protein OS=Culex quinquefasciatus GN=CpipJ_CPIJ005145 PE=4 SV=1 |

|             |      |     |     |            |             |              |      |          |          |                                                                                              |
|-------------|------|-----|-----|------------|-------------|--------------|------|----------|----------|----------------------------------------------------------------------------------------------|
| CCG012771.1 | 3801 | 20  | 187 | 0.226097   | 1.719862604 | 2.927279569  | Up   | 3.69E-10 | 7.71E-10 | AAEL010370-PA OS=Aedes aegypti GN=AAEL010370 PE=4 SV=1                                       |
| CCG026433.1 | 928  | 20  | 187 | 0.92607187 | 7.044394134 | 2.927279569  | Up   | 3.69E-10 | 7.72E-10 | AAEL012839-PA OS=Aedes aegypti GN=AAEL012839 PE=4 SV=1                                       |
| CCG007648.1 | 1050 | 28  | 187 | 1.14585959 | 6.225902625 | 2.441852742  | Up   | 1.17E-12 | 2.85E-12 | AAEL001249-PA OS=Aedes aegypti GN=AAEL001249 PE=4 SV=1                                       |
| CCG022998.1 | 2020 | 33  | 187 | 0.70198081 | 3.236236513 | 2.204813544  | Up   | 1.31E-13 | 4.02E-13 | AAEL005083-PA OS=Aedes aegypti GN=AAEL005083 PE=4 SV=1                                       |
| CCG017556.1 | 894  | 45  | 187 | 2.1629061  | 7.312301741 | 1.757354567  | Up   | 0        | 0        | AAEL008911-PA OS=Aedes aegypti GN=AAEL008911 PE=4 SV=1                                       |
| CCG024830.1 | 1759 | 49  | 187 | 1.19699659 | 3.716428514 | 1.63449782   | Up   | 0        | 0        | Kruppel-like zinc finger protein, putative OS=Ixodes scapularis GN=IscW_ISCW018847 PE=4 SV=1 |
| CCG008152.1 | 506  | 55  | 187 | 4.67062333 | 12.91936315 | 1.46784795   | Up   | 8.47E-13 | 2.12E-12 | RAB-interacting factor OS=Aedes aegypti PE=2 SV=1                                            |
| CCG004313.1 | 601  | 65  | 187 | 4.64730907 | 10.87720093 | 1.226839851  | Up   | 4.66E-10 | 9.72E-10 | AAEL003105-PA (Fragment) OS=Aedes aegypti GN=AAEL003105 PE=4 SV=1                            |
| CCG002055.1 | 1005 | 68  | 187 | 2.90740493 | 6.504674384 | 1.161744822  | Up   | 2.40E-09 | 4.90E-09 | AAEL002790-PA OS=Aedes aegypti GN=AAEL002790 PE=4 SV=1                                       |
| CCG018023.1 | 520  | 72  | 187 | 5.94965556 | 12.57153415 | 1.079282662  | Up   | 1.84E-08 | 3.63E-08 | AGAP007614-PA OS=Anopheles gambiae GN=AGAP007614 PE=4 SV=2                                   |
| CCG003921.1 | 1491 | 75  | 187 | 2.16145546 | 4.384438468 | 1.020388973  | Up   | 7.64E-08 | 1.47E-07 | Cytochrome P450 OS=Aedes albopictus PE=2 SV=1                                                |
| CCG024877.1 | 3780 | 323 | 187 | 3.67175245 | 1.729417396 | -1.086182691 | Down | 5.55E-17 | 2.10E-16 | AAEL010252-PA OS=Aedes aegypti GN=AAEL010252 PE=4 SV=1                                       |
| CCG017747.1 | 1977 | 336 | 187 | 7.30289875 | 3.306625066 | -1.143109759 | Down | 5.41E-19 | 2.09E-18 | AAEL000330-PA OS=Aedes aegypti GN=AAEL000330 PE=2 SV=1                                       |
| CCG024706.1 | 4698 | 346 | 187 | 3.16465053 | 1.391485261 | -1.185420564 | Down | 1.36E-20 | 5.34E-20 | Putative uncharacterized protein OS=Culex quinquefasciatus GN=CpipJ_CPIJ015717 PE=4 SV=1     |
| CCG023795.2 | 1812 | 468 | 187 | 11.0981434 | 3.607725031 | -1.621157056 | Down | 4.55E-43 | 2.05E-42 | AAEL010527-PA OS=Aedes aegypti GN=AAEL010527 PE=4 SV=1                                       |

|             |      |     |     |            |             |              |      |          |          |                                                                                           |
|-------------|------|-----|-----|------------|-------------|--------------|------|----------|----------|-------------------------------------------------------------------------------------------|
| CCG000631.1 | 1752 | 584 | 187 | 14.3232449 | 3.731277258 | -1.940616895 | Down | 3.69E-68 | 1.82E-67 | AAEL007282-PA OS=Aedes aegypti GN=AAEL007282 PE=4 SV=1                                    |
| CCG023732.1 | 714  | 10  | 188 | 0.60181701 | 9.204700327 | 3.934973961  | Up   | 5.43E-07 | 1.01E-06 | AAEL013634-PA OS=Aedes aegypti GN=AAEL013634 PE=4 SV=1                                    |
| CCG012902.1 | 1890 | 13  | 188 | 0.29555902 | 3.477331234 | 3.556462337  | Up   | 6.34E-08 | 1.23E-07 | AAEL009031-PA OS=Aedes aegypti GN=AAEL009031 PE=4 SV=1                                    |
| CCG008144.1 | 813  | 14  | 188 | 0.73994623 | 8.083832759 | 3.449547133  | Up   | 3.07E-08 | 6.01E-08 | AAEL001580-PA OS=Aedes aegypti GN=AAEL001580 PE=4 SV=1                                    |
| CCG008699.1 | 1227 | 25  | 188 | 0.87550397 | 5.356280386 | 2.613045866  | Up   | 9.32E-12 | 2.08E-11 | AAEL009918-PA OS=Aedes aegypti GN=AAEL009918 PE=4 SV=1                                    |
| CCG026465.1 | 2106 | 32  | 188 | 0.65291145 | 3.120681877 | 2.256902055  | Up   | 1.77E-13 | 5.17E-13 | Putative uncharacterized protein OS=Culex quinquefasciatus GN=CpipJ_CPIJ006366 PE=4 SV=1  |
| CCG012980.1 | 2355 | 33  | 188 | 0.60212367 | 2.79072443  | 2.212507936  | Up   | 1.31E-13 | 4.01E-13 | Putative uncharacterized protein (Fragment) OS=Solenopsis invicta GN=SINV_11683 PE=4 SV=1 |
| CCG017445.1 | 834  | 435 | 188 | 22.4122716 | 7.880283013 | -1.507969535 | Down | 2.96E-36 | 1.29E-35 | Membrane glycoprotein LIG-1 (Fragment) OS=Aedes aegypti PE=2 SV=1                         |
| CCG011122.1 | 1638 | 607 | 188 | 15.9234609 | 4.012305271 | -1.988650651 | Down | 4.42E-73 | 2.21E-72 | AAEL012481-PA (Fragment) OS=Aedes aegypti GN=HPX6 PE=4 SV=2                               |
| CCG000272.1 | 2832 | 614 | 188 | 9.31617834 | 2.320676565 | -2.00519279  | Down | 1.05E-74 | 5.26E-74 | AAEL011638-PA (Fragment) OS=Aedes aegypti GN=AAEL011638 PE=4 SV=1                         |
| CCG007322.2 | 1284 | 12  | 189 | 0.4015863  | 5.145727656 | 3.679593127  | Up   | 1.30E-07 | 2.49E-07 | tRNA methyltransferase OS=Culex quinquefasciatus GN=CpipJ_CPIJ009249 PE=4 SV=1            |
| CCG011365.2 | 318  | 17  | 189 | 2.29712418 | 20.77708903 | 3.177092787  | Up   | 3.39E-09 | 6.88E-09 | AAEL005884-PA OS=Aedes aegypti GN=AAEL005884 PE=4 SV=1                                    |
| CCG023173.1 | 498  | 24  | 189 | 2.07083058 | 13.26729781 | 2.679593127  | Up   | 1.93E-11 | 4.23E-11 | AAEL010832-PA OS=Aedes aegypti GN=AAEL010832 PE=4 SV=1                                    |
| CCG024132.1 | 810  | 36  | 189 | 1.90976598 | 8.156931247 | 2.094630627  | Up   | 6.13E-14 | 2.03E-13 | AAEL004513-PA (Fragment) OS=Aedes aegypti GN=AAEL004513 PE=3 SV=1                         |

|             |      |      |     |            |             |              |      |           |            |                                                               |
|-------------|------|------|-----|------------|-------------|--------------|------|-----------|------------|---------------------------------------------------------------|
| CCG016874.1 | 931  | 50   | 189 | 2.30771937 | 7.096793029 | 1.620699438  | Up   | 0         | 0          | AAEL0006859-PA OS=Redes<br>aegypti GN=AAEL006859 PE=4<br>SV_1 |
| CCG002160.1 | 1083 | 70   | 189 | 2.7773605  | 6.100751902 | 1.135272611  | Up   | 3.83E-09  | 7.76E-09   | AAEL001930-PA OS=Redes<br>aegypti GN=AAEL001930 PE=4<br>SV_1  |
| CCG009010.1 | 1081 | 76   | 189 | 3.02099892 | 6.11203914  | 1.016628115  | Up   | 7.12E-08  | 1.37E-07   | -                                                             |
| CCG009923.1 | 1956 | 1389 | 189 | 30.5137839 | 3.377870302 | -3.175275256 | Down | 1.84E-283 | 1.15E-282  | AAEL003247-PA OS=Redes<br>aegypti GN=AAEL003247 PE=4<br>SV_2  |
| CCG008458.1 | 513  | 0    | 190 | 0.001      | 12.94750992 | 13.66038704  | Up   | 4.44E-16  | 1.64E-15   | AAEL001949-PA OS=Redes<br>aegypti GN=AAEL001949 PE=4<br>SV_1  |
| CCG002691.1 | 593  | 2    | 190 | 0.14492322 | 11.20079694 | 6.272168812  | Up   | 9.36E-05  | 0.00015372 | -                                                             |
| CCG005082.1 | 231  | 8    | 190 | 1.48812934 | 28.75356098 | 4.272168812  | Up   | 2.19E-06  | 3.96E-06   | -                                                             |
| CCG004650.1 | 1202 | 18   | 190 | 0.64347356 | 5.525850738 | 3.102243811  | Up   | 1.62E-09  | 3.32E-09   | AAEL001996-PA OS=Redes<br>aegypti GN=AAEL001996 PE=4<br>SV_1  |
| CCG022994.1 | 2058 | 26   | 190 | 0.54286351 | 3.227440518 | 2.571729094  | Up   | 4.60E-12  | 1.05E-11   | AAEL005067-PA OS=Redes<br>aegypti GN=AAEL005067 PE=4<br>SV_1  |
| CCG015346.1 | 1018 | 28   | 190 | 1.18187875 | 6.52462926  | 2.46481389   | Up   | 1.17E-12  | 2.86E-12   | AAEL000427-PA OS=Redes<br>aegypti GN=AAEL000427 PE=4<br>SV_1  |
| CCG000665.1 | 1761 | 28   | 190 | 0.68322122 | 3.771761832 | 2.46481389   | Up   | 1.17E-12  | 2.85E-12   | AAEL009100-PA OS=Redes<br>aegypti GN=AAEL009100 PE=3<br>SV_1  |
| CCG010928.1 | 1005 | 28   | 190 | 1.19716674 | 6.609027449 | 2.46481389   | Up   | 1.17E-12  | 2.85E-12   | -                                                             |
| CCG005148.1 | 1341 | 30   | 190 | 0.9612916  | 4.953074263 | 2.365278217  | Up   | 3.71E-13  | 9.93E-13   | AAEL009669-PA OS=Redes<br>aegypti GN=AAEL009669 PE=4<br>SV_1  |
| CCG009596.1 | 1731 | 38   | 190 | 0.94329862 | 3.837130322 | 2.024241299  | Up   | 4.26E-14  | 1.45E-13   | AAEL010596-PA OS=Redes<br>aegypti GN=AAEL010596 PE=3<br>SV_1  |
| CCG022800.1 | 1308 | 40   | 190 | 1.31405916 | 5.078037146 | 1.950240717  | Up   | 6.86E-14  | 2.24E-13   | AAEL011367-PA OS=Redes<br>aegypti GN=AAEL011367 PE=4<br>SV_1  |
| CCG007064.1 | 774  | 45   | 190 | 2.49824038 | 8.58148913  | 1.780315716  | Up   | 0         | 0          | AAEL002258-PA OS=Redes<br>aegypti GN=AAEL002258 PE=4<br>SV_1  |
| CCG026242.1 | 1197 | 56   | 190 | 2.01027998 | 5.548932821 | 1.46481389   | Up   | 6.14E-13  | 1.57E-12   | AAEL005947-PA OS=Redes<br>aegypti GN=AAEL005947 PE=4<br>SV_1  |
| CCG009645.1 | 1605 | 319  | 190 | 8.54040208 | 4.138362982 | -1.045243802 | Down | 7.39E-16  | 2.70E-15   | -                                                             |
| CCG002022.1 | 537  | 334  | 190 | 26.7260547 | 12.36885025 | -1.11153548  | Down | 4.04E-18  | 1.55E-17   | AAEL003270-PA OS=Redes<br>aegypti GN=AAEL003270 PE=4<br>SV_1  |
| CCG026644.1 | 1140 | 454  | 190 | 17.1125083 | 5.826379462 | -1.554379675 | Down | 1.99E-39  | 8.85E-39   | AAEL013794-PA OS=Redes<br>aegypti GN=AAEL013794 PE=4<br>SV_1  |

|             |      |      |     |            |             |              |      |           |           |                                                                                          |
|-------------|------|------|-----|------------|-------------|--------------|------|-----------|-----------|------------------------------------------------------------------------------------------|
| CCG015231.1 | 993  | 606  | 190 | 26.2232217 | 6.688894851 | -1.971005171 | Down | 4.06E-72  | 2.02E-71  | -                                                                                        |
| CCG007219.1 | 1224 | 633  | 190 | 22.2220931 | 5.426529891 | -2.033892877 | Down | 2.15E-78  | 1.09E-77  | AAEL009107-PA OS=Aedes aegypti GN=AAEL009167 PE=3 SV=1                                   |
| CCG005409.1 | 1469 | 721  | 190 | 21.0899787 | 4.521492571 | -2.221686637 | Down | 1.33E-99  | 7.07E-99  | -                                                                                        |
| CCG005078.1 | 934  | 3    | 191 | 0.13801842 | 7.148855314 | 5.694779531  | Up   | 5.28E-05  | 8.86E-05  | -                                                                                        |
| CCG026372.1 | 1680 | 14   | 191 | 0.35808112 | 3.974423133 | 3.47238711   | Up   | 3.07E-08  | 6.00E-08  | AAEL014180-PA OS=Aedes aegypti GN=AAEL014180 PE=4 SV=1                                   |
| CCG008011.1 | 777  | 21   | 191 | 1.16134418 | 8.593347315 | 2.887424609  | Up   | 1.76E-10  | 3.73E-10  | Aisr1 OS=Culex quinquefasciatus GN=CpipJ_CPIJ008260 PE=4 SV=1                            |
| CCG013646.1 | 909  | 40   | 191 | 1.89085741 | 7.345468497 | 1.957813937  | Up   | 6.86E-14  | 2.25E-13  | AAEL009957-PA OS=Aedes aegypti GN=AAEL009957 PE=4 SV=1                                   |
| CCG018115.1 | 1495 | 61   | 191 | 1.75328014 | 4.46624138  | 1.349004694  | Up   | 1.24E-11  | 2.76E-11  | AAEL003244-PA OS=Aedes aegypti GN=AAEL003244 PE=4 SV=1                                   |
| CCG015580.1 | 2968 | 69   | 191 | 0.99895946 | 2.249673472 | 1.171217575  | Up   | 1.27E-09  | 2.61E-09  | AAEL005690-PA OS=Aedes aegypti GN=AAEL005690 PE=4 SV=1                                   |
| CCG016324.3 | 1588 | 362  | 191 | 9.79536771 | 4.204679385 | -1.220103855 | Down | 2.08E-22  | 8.28E-22  | Putative uncharacterized protein OS=Culex quinquefasciatus GN=CpipJ_CPIJ014309 PE=4 SV=1 |
| CCG021047.1 | 1059 | 701  | 191 | 28.4436109 | 6.305033865 | -2.173528602 | Down | 2.82E-94  | 1.48E-93  | AAEL015296-PA OS=Aedes aegypti GN=AAEL015296 PE=3 SV=1                                   |
| CCG011482.1 | 3270 | 707  | 191 | 9.29039828 | 2.041905463 | -2.185824373 | Down | 9.64E-96  | 5.07E-95  | Tyrosine kinase OS=Culex quinquefasciatus GN=CpipJ_CPIJ000270 PE=3 SV=1                  |
| CCG018579.1 | 2418 | 901  | 191 | 16.0114685 | 2.7613858   | -2.535641264 | Down | 2.62E-145 | 1.48E-144 | AAEL002869-PA OS=Aedes aegypti GN=AAEL002869 PE=4 SV=1                                   |
| CCG015004.1 | 1164 | 1532 | 191 | 56.5546679 | 5.736280811 | -3.30145855  | Down | 0         | 0         | AAEL012849-PA OS=Aedes aegypti GN=AAEL012849 PE=4 SV=1                                   |
| CCG012108.1 | 372  | 2    | 192 | 0.23102008 | 18.04298156 | 6.287275705  | Up   | 9.36E-05  | 0.0001534 | AGAP006823-PA OS=Anopheles gambiae GN=AGAP006823 PE=4 SV=1                               |
| CCG009427.1 | 3255 | 6    | 192 | 0.07920688 | 2.062055035 | 4.702313204  | Up   | 8.38E-06  | 1.47E-05  | AAEL008126-PA OS=Aedes aegypti GN=GPRCIR PE=4 SV=2                                       |
| CCG000168.1 | 743  | 16   | 192 | 0.92532403 | 9.033632759 | 3.287275705  | Up   | 7.09E-09  | 1.42E-08  | -                                                                                        |
| CCG007587.1 | 870  | 21   | 192 | 1.03720049 | 7.714930046 | 2.894958282  | Up   | 1.76E-10  | 3.73E-10  | AAEL004125-PA OS=Aedes aegypti GN=AAEL004125 PE=4 SV=1                                   |



|             |      |      |     |            |             |              |      |          |          |                                                                                    |
|-------------|------|------|-----|------------|-------------|--------------|------|----------|----------|------------------------------------------------------------------------------------|
| CCG014508.1 | 927  | 43   | 192 | 1.99320236 | 7.240549234 | 1.86101095   | Up   | 8.46E-14 | 2.70E-13 | AAEL007203-PA OS=Aedes aegypti GN=AAEL007203 PE=4 SV=1                             |
| CCG011108.1 | 2231 | 51   | 192 | 0.98227542 | 3.008511493 | 1.614850363  | Up   | 0        | 0        | AAEL003763-PA (Fragment) OS=Aedes aegypti GN=CYP329B1 PE=3 SV=1                    |
| CCG001976.1 | 2520 | 60   | 192 | 1.02308892 | 2.663487754 | 1.380385109  | Up   | 4.68E-12 | 1.07E-11 | AAEL007693-PA OS=Aedes aegypti GN=AAEL007693 PE=4 SV=1                             |
| CCG000301.1 | 1203 | 64   | 192 | 2.28600417 | 5.579375844 | 1.287275705  | Up   | 5.60E-11 | 1.21E-10 | AAEL000315-PA OS=Aedes aegypti GN=AAEL000315 PE=4 SV=1                             |
| CCG023856.1 | 1844 | 76   | 192 | 1.77098689 | 3.639907343 | 1.039348191  | Up   | 3.20E-08 | 6.27E-08 | AAEL008544-PA OS=Aedes aegypti GN=AAEL008544 PE=4 SV=1                             |
| CCG024972.1 | 3128 | 334  | 192 | 4.58820056 | 2.145776579 | -1.096428588 | Down | 9.37E-18 | 3.57E-17 | -                                                                                  |
| CCG027669.1 | 3036 | 423  | 192 | 5.9868899  | 2.210800112 | -1.437238149 | Down | 5.93E-33 | 2.54E-32 | AAEL007619-PA OS=Aedes aegypti GN=TOLL5A PE=4 SV=1                                 |
| CCG018927.1 | 1612 | 558  | 192 | 14.8741389 | 4.163764975 | -1.836845607 | Down | 1.33E-60 | 6.44E-60 | AAEL006969-PA OS=Aedes aegypti GN=CYP6AG7 PE=3 SV=1                                |
| CCG006875.2 | 1221 | 680  | 192 | 23.9307285 | 5.497124603 | -2.122115232 | Down | 8.74E-89 | 4.53E-88 | Alanylacylase OS=Culex quinquefasciatus GN=CpipJ_CPIJ013671 PE=4 SV=1              |
| CCG017577.1 | 3069 | 1714 | 192 | 23.9980857 | 2.187028068 | -3.45587569  | Down | 0        | 0        | AAEL005392-PA OS=Aedes aegypti GN=AAEL005392 PE=4 SV=1                             |
| CCG008719.1 | 1128 | 8    | 193 | 0.30474989 | 5.981336363 | 4.294770241  | Up   | 2.19E-06 | 3.97E-06 | DNA replication complex GINS protein PSF2 OS=Aedes aegypti GN=AAEL006660 PE=3 SV=1 |
| CCG015577.3 | 1554 | 8    | 193 | 0.22120841 | 4.341665005 | 4.294770241  | Up   | 2.19E-06 | 3.96E-06 | AAEL013862-PA OS=Aedes aegypti GN=AAEL013862 PE=3 SV=1                             |
| CCG018265.1 | 1767 | 17   | 193 | 0.41340435 | 3.818306405 | 3.2073074    | Up   | 3.39E-09 | 6.89E-09 | AAEL009198-PA OS=Aedes aegypti GN=AAEL009198 PE=4 SV=1                             |
| CCG006100.1 | 915  | 28   | 193 | 1.31492084 | 7.373713024 | 2.487415319  | Up   | 1.17E-12 | 2.85E-12 | AAEL002928-PA OS=Aedes aegypti GN=AAEL002928 PE=4 SV=1                             |
| CCG018558.1 | 810  | 42   | 193 | 2.22806031 | 8.329564712 | 1.902452818  | Up   | 7.66E-14 | 2.47E-13 | AAEL002219-PA OS=Aedes aegypti GN=AAEL002219 PE=4 SV=1                             |
| CCG018989.1 | 1326 | 42   | 193 | 1.36103232 | 5.088195639 | 1.902452818  | Up   | 7.66E-14 | 2.47E-13 | AGAP006454-PA OS=Anopheles gambiae GN=AGAP006454 PE=4 SV=4                         |

|             |      |     |     |            |             |              |      |          |          |                                                                                          |
|-------------|------|-----|-----|------------|-------------|--------------|------|----------|----------|------------------------------------------------------------------------------------------|
| CCG027195.1 | 1206 | 55  | 193 | 1.95964793 | 5.594483762 | 1.513410528  | Up   | 4.09E-14 | 1.40E-13 | AAEL003657-PA OS=Aedes aegypti GN=AAEL003657 PE=4 SV=1                                   |
| CCG019671.1 | 1068 | 63  | 193 | 2.53473154 | 6.317366495 | 1.317490318  | Up   | 2.24E-11 | 4.90E-11 | AAEL008608-PA OS=Aedes aegypti GN=AAEL008608 PE=4 SV=1                                   |
| CCG009607.1 | 791  | 64  | 193 | 3.47669155 | 8.529642752 | 1.294770241  | Up   | 4.09E-11 | 8.84E-11 | AAEL001738-PA OS=Aedes aegypti GN=AAEL001738 PE=4 SV=1                                   |
| CCG003901.1 | 656  | 73  | 193 | 4.78169303 | 10.28498082 | 1.104945682  | Up   | 5.68E-09 | 1.14E-08 | -                                                                                        |
| CCG026608.1 | 802  | 480 | 193 | 25.7175469 | 8.41265264  | -1.612120355 | Down | 8.74E-44 | 3.96E-43 | -                                                                                        |
| CCG015339.1 | 1174 | 675 | 193 | 24.7057673 | 5.74697395  | -2.103973451 | Down | 3.45E-87 | 1.78E-86 | AAEL003291-PA OS=Aedes aegypti GN=AAEL003291 PE=4 SV=1                                   |
| CCG009388.1 | 861  | 23  | 194 | 1.14785586 | 7.876777809 | 2.77866409   | Up   | 4.01E-11 | 8.66E-11 | AAEL003451-PA OS=Aedes aegypti GN=AAEL003451 PE=4 SV=1                                   |
| CCG015763.2 | 1554 | 39  | 194 | 1.07839102 | 4.364160678 | 2.016823827  | Up   | 7.33E-14 | 2.38E-13 | AAEL014412-PA OS=Aedes aegypti GN=CYP304B2 PE=3 SV=1                                     |
| CCG019092.1 | 1806 | 50  | 194 | 1.18963828 | 3.755208025 | 1.658369856  | Up   | 0        | 0        | AAEL002312-PA OS=Aedes aegypti GN=AAEL002312 PE=4 SV=1                                   |
| CCG006010.1 | 1603 | 54  | 194 | 1.44751445 | 4.230758387 | 1.547338544  | Up   | 6.22E-15 | 2.24E-14 | AAEL013897-PA OS=Aedes aegypti GN=AAEL013897 PE=4 SV=1                                   |
| CCG004684.1 | 402  | 60  | 194 | 6.41339323 | 16.87041217 | 1.39533545   | Up   | 2.38E-12 | 5.62E-12 | AAEL001819-PA OS=Aedes aegypti GN=AAEL001819 PE=4 SV=1                                   |
| CCG010620.1 | 2873 | 71  | 194 | 1.06190434 | 2.360565852 | 1.152478927  | Up   | 1.53E-09 | 3.14E-09 | Putative uncharacterized protein OS=Culex quinquefasciatus GN=CpipJ_CPIJ004442 PE=4 SV=1 |
| CCG027558.1 | 4815 | 76  | 194 | 0.67823465 | 1.408495471 | 1.054298533  | Up   | 1.87E-08 | 3.69E-08 | AAEL008117-PA OS=Aedes aegypti GN=AAEL008117 PE=4 SV=1                                   |
| CCG010292.1 | 1419 | 350 | 194 | 10.5985956 | 4.779355669 | -1.148985066 | Down | 7.18E-20 | 2.80E-19 | AAEL005284-PA OS=Aedes aegypti GN=AAEL005284 PE=4 SV=1                                   |
| CCG004310.1 | 1722 | 367 | 194 | 9.1578935  | 3.938388905 | -1.217410207 | Down | 1.27E-22 | 5.07E-22 | AAEL010142-PA OS=Aedes aegypti GN=AAEL010142 PE=4 SV=1                                   |
| CCG018661.1 | 2373 | 489 | 194 | 8.85469879 | 2.857945931 | -1.631464609 | Down | 2.52E-45 | 1.15E-44 | AAEL002511-PA (Fragment) OS=Aedes aegypti GN=AAEL002511 PE=4 SV=1                        |
| CCG020993.1 | 1293 | 505 | 194 | 16.7824563 | 5.245093344 | -1.677913532 | Down | 1.29E-48 | 5.95E-48 | AAEL001899-PA OS=Aedes aegypti GN=AAEL001899 PE=4 SV=1                                   |

|             |      |     |     |            |             |              |      |           |           |                                                                                          |
|-------------|------|-----|-----|------------|-------------|--------------|------|-----------|-----------|------------------------------------------------------------------------------------------|
| CCG023042.1 | 636  | 588 | 194 | 39.7267358 | 10.66337373 | -1.897446299 | Down | 1.34E-66  | 6.57E-66  | AAEL001817-PA OS=Aedes aegypti GN=AAEL001817 PE=4 SV=1                                   |
| CCG028356.1 | 1200 | 748 | 194 | 26.7844679 | 5.651588078 | -2.244668414 | Down | 1.38E-104 | 7.35E-104 | AAEL011248-PA OS=Aedes aegypti GN=AAEL011248 PE=4 SV=1                                   |
| CCG026935.1 | 444  | 0   | 195 | 0.001      | 15.35329723 | 13.9062609   | Up   | 4.44E-16  | 1.63E-15  | AAEL0003185-PA OS=Aedes aegypti GN=AAEL003185 PE=4 SV=1                                  |
| CCG022213.1 | 594  | 0   | 195 | 0.001      | 11.47620197 | 13.48635764  | Up   | 4.44E-16  | 1.66E-15  | AAEL0006892-PA OS=Aedes aegypti GN=AAEL006892 PE=4 SV=1                                  |
| CCG007632.1 | 1008 | 16  | 195 | 0.68205928 | 6.762761876 | 3.309643518  | Up   | 7.09E-09  | 1.42E-08  | AAEL007481-PA OS=Aedes aegypti GN=AAEL007481 PE=4 SV=1                                   |
| CCG016101.1 | 822  | 32  | 195 | 1.67278772 | 8.293021862 | 2.309643518  | Up   | 1.77E-13  | 5.16E-13  | Putative uncharacterized protein OS=Culex quinquefasciatus GN=CpipJ_CPIJ013674 PE=4 SV=1 |
| CCG024682.1 | 1184 | 38  | 195 | 1.37909621 | 5.757486462 | 2.061716004  | Up   | 4.26E-14  | 1.45E-13  | AAEL007270-PA OS=Aedes aegypti GN=AAEL007270 PE=4 SV=1                                   |
| CCG004649.2 | 1878 | 40  | 195 | 0.91522331 | 3.629853019 | 1.987715423  | Up   | 6.86E-14  | 2.24E-13  | AAEL001966-PA OS=Aedes aegypti GN=AAEL001966 PE=4 SV=1                                   |
| CCG001946.1 | 1074 | 44  | 195 | 1.76039881 | 6.347173157 | 1.850211899  | Up   | 3.91E-14  | 1.34E-13  | AAEL0005139-PA OS=Aedes aegypti GN=AAEL005139 PE=4 SV=1                                  |
| CCG000492.1 | 1233 | 50  | 195 | 1.74248721 | 5.528681241 | 1.665787328  | Up   | 0         | 0         | AAEL001590-PA OS=Aedes aegypti GN=AAEL001590 PE=4 SV=1                                   |
| CCG020188.1 | 2814 | 479 | 195 | 7.31432227 | 2.422481866 | -1.594238328 | Down | 5.12E-43  | 2.31E-42  | AAEL0003276-PA OS=Aedes aegypti GN=AAEL003276 PE=3 SV=1                                  |
| CCG010102.1 | 693  | 520 | 195 | 32.2428023 | 9.836744546 | -1.712724295 | Down | 1.88E-51  | 8.83E-51  | AAEL012858-PA OS=Aedes aegypti GN=AAEL012858 PE=4 SV=1                                   |
| CCG016765.1 | 1677 | 6   | 196 | 0.15373787 | 4.085761626 | 4.732060547  | Up   | 8.38E-06  | 1.48E-05  | AAEL004909-PA OS=Aedes aegypti GN=AAEL004909 PE=4 SV=1                                   |
| CCG002197.1 | 635  | 8   | 196 | 0.54135099 | 10.79027126 | 4.317023048  | Up   | 2.19E-06  | 3.97E-06  | -                                                                                        |
| CCG023383.1 | 681  | 12  | 196 | 0.75717594 | 10.06141299 | 3.732060547  | Up   | 1.30E-07  | 2.49E-07  | -                                                                                        |
| CCG002721.1 | 552  | 15  | 196 | 1.16765583 | 12.41272146 | 3.410132452  | Up   | 1.48E-08  | 2.93E-08  | -                                                                                        |
| CCG011525.1 | 1116 | 38  | 196 | 1.46312716 | 6.13962567  | 2.069095534  | Up   | 4.26E-14  | 1.45E-13  | Extracellular signal-regulated kinase OS=Sarcophaga crassipalpis GN=erk PE=2 SV=1        |
| CCG026963.1 | 1380 | 39  | 196 | 1.21436207 | 4.965088585 | 2.031620829  | Up   | 7.33E-14  | 2.38E-13  | AAEL005068-PA OS=Aedes aegypti GN=AAEL005068 PE=4 SV=1                                   |

|             |      |      |     |            |             |              |      |          |            |                                                                                                     |
|-------------|------|------|-----|------------|-------------|--------------|------|----------|------------|-----------------------------------------------------------------------------------------------------|
| CCG012792.1 | 342  | 40   | 196 | 5.02569995 | 20.03456797 | 1.995094953  | Up   | 6.86E-14 | 2.25E-13   | AAEL007444-PA OS=Aedes aegypti GN=AAEL007444 PE=4 SV=1                                              |
| CCG006982.1 | 1035 | 46   | 196 | 1.90976598 | 6.620118113 | 1.793461092  | Up   | 3.40E-14 | 1.18E-13   | AAEL007607-PA OS=Aedes aegypti GN=AAEL007607 PE=4 SV=1                                              |
| CCG025008.1 | 918  | 46   | 196 | 2.15316753 | 7.463858657 | 1.793461092  | Up   | 3.40E-14 | 1.18E-13   | AAEL015041-PA OS=Aedes aegypti GN=AAEL015041 PE=3 SV=1                                              |
| CCG023474.1 | 1434 | 50   | 196 | 1.49824737 | 4.778118722 | 1.673166858  | Up   | 0        | 0          | DNA ligase 4 OS=Culex quinquefasciatus GN=CpipJ_CPIJ005161 PE=3 SV=1                                |
| CCG016131.1 | 1449 | 55   | 196 | 1.63101132 | 4.728655795 | 1.535663334  | Up   | 0        | 0          | AAEL006815-PA OS=Aedes aegypti GN=CYP9J16 PE=3 SV=1                                                 |
| CCG016333.1 | 3888 | 75   | 196 | 0.82889149 | 1.762299961 | 1.088204357  | Up   | 6.64E-09 | 1.33E-08   | Cainmodulin-binding transcription activator OS=Culex quinquefasciatus GN=CpipJ_CPIJ003688 PE=4 SV=1 |
| CCG012307.1 | 1647 | 333  | 196 | 8.68786984 | 4.160183514 | -1.062355319 | Down | 6.83E-17 | 2.58E-16   | AAEL010219-PA OS=Aedes aegypti GN=AAEL010219 PE=4 SV=1                                              |
| CCG026336.1 | 2562 | 381  | 196 | 6.39011276 | 2.674403687 | -1.25662414  | Down | 1.51E-24 | 6.11E-24   | -                                                                                                   |
| CCG016582.1 | 915  | 1995 | 196 | 93.6881099 | 7.488330325 | -3.645149983 | Down | 0        | 0          | Putative uncharacterized protein OS=Culex quinquefasciatus GN=CpipJ_CPIJ009981 PE=4 SV=1            |
| CCG018504.1 | 1035 | 0    | 197 | 0.001      | 6.653894226 | 12.69998322  | Up   | 4.44E-16 | 1.64E-15   | AAEL005916-PA OS=Aedes aegypti GN=AAEL005916 PE=4 SV=1                                              |
| CCG014759.1 | 852  | 1    | 197 | 0.05043396 | 8.083075733 | 7.324365023  | Up   | 0.000587 | 0.00091763 | AAEL002647-PA OS=Aedes aegypti GN=AAEL002647 PE=4 SV=1                                              |
| CCG014052.1 | 411  | 11   | 197 | 1.15004156 | 16.75615699 | 3.864933405  | Up   | 2.67E-07 | 5.03E-07   | AAEL011472-PA OS=Aedes aegypti GN=AAEL011472 PE=4 SV=1                                              |
| CCG015486.1 | 1683 | 17   | 197 | 0.43403772 | 4.091967038 | 3.236902182  | Up   | 3.39E-09 | 6.89E-09   | AAEL005783-PA OS=Aedes aegypti GN=AAEL005783 PE=4 SV=1                                              |
| CCG018109.1 | 2946 | 18   | 197 | 0.2625442  | 2.337671597 | 3.154440022  | Up   | 1.62E-09 | 3.33E-09   | AAEL009477-PA OS=Aedes aegypti GN=AAEL009477 PE=4 SV=1                                              |
| CCG011765.1 | 1348 | 24   | 197 | 0.76503979 | 5.108887629 | 2.739402523  | Up   | 1.93E-11 | 4.23E-11   | AAEL012505-PA OS=Aedes aegypti GN=AAEL012505 PE=4 SV=1                                              |
| CCG026348.1 | 1752 | 29   | 197 | 0.71125702 | 3.930810801 | 2.466384028  | Up   | 6.66E-13 | 1.69E-12   | AAEL001015-PA OS=Aedes aegypti GN=AAEL001015 PE=4 SV=1                                              |

|             |      |     |     |            |             |              |      |          |          |                                                                |
|-------------|------|-----|-----|------------|-------------|--------------|------|----------|----------|----------------------------------------------------------------|
| CCG016564.1 | 891  | 30  | 197 | 1.44679241 | 7.729271071 | 2.417474428  | Up   | 3.71E-13 | 9.94E-13 | AAEL013901-PA OS=Aedes aegypti GN=AAEL013901 PE=4 SV=1         |
| CCG018808.1 | 1539 | 32  | 197 | 0.89345777 | 4.474841146 | 2.324365023  | Up   | 1.77E-13 | 5.16E-13 | AAEL012391-PA OS=Aedes aegypti GN=AAEL012391 PE=4 SV=1         |
| CCG027408.1 | 3474 | 50  | 197 | 0.61844753 | 1.982377814 | 1.680508833  | Up   | 0        | 0        | AAEL002820-PA OS=Aedes aegypti GN=AAEL002820 PE=4 SV=1         |
| CCG004181.1 | 1130 | 59  | 197 | 2.24355252 | 6.094496039 | 1.441721974  | Up   | 4.50E-13 | 1.18E-12 | AAEL000562-PA OS=Aedes aegypti GN=AAEL000562 PE=4 SV=1         |
| CCG018930.1 | 2964 | 437 | 197 | 6.33528138 | 2.323475211 | -1.447124446 | Down | 2.51E-34 | 1.08E-33 | AAEL007004-PA (Fragment) OS=Aedes aegypti GN=GPRBOS1 PE=4 SV=2 |
| CCG023908.1 | 762  | 456 | 197 | 25.7141719 | 9.037769717 | -1.508524991 | Down | 6.06E-38 | 2.68E-37 | AAEL001850-PA OS=Aedes aegypti GN=AAEL001850 PE=4 SV=1         |
| CCG022390.1 | 1603 | 495 | 197 | 13.2688825 | 4.296182485 | -1.626919692 | Down | 1.11E-45 | 5.08E-45 | AAEL000515-PA OS=Aedes aegypti GN=AAEL000515 PE=4 SV=1         |
| CCG021590.1 | 753  | 725 | 197 | 41.3719224 | 9.145790869 | -2.177472162 | Down | 1.16E-97 | 6.10E-97 | AAEL008936-PA OS=Aedes aegypti GN=AAEL008936 PE=4 SV=1         |
| CCG011739.1 | 918  | 0   | 198 | 0.001      | 7.54002048  | 12.88035273  | Up   | 4.44E-16 | 1.64E-15 | AAEL000769-PA OS=Aedes aegypti GN=AAEL000769 PE=4 SV=1         |
| CCG022854.1 | 1178 | 19  | 198 | 0.69306024 | 5.87583939  | 3.08374231   | Up   | 7.73E-10 | 1.60E-09 | AAEL012864-PA OS=Aedes aegypti GN=AAEL012864 PE=4 SV=1         |
| CCG026360.1 | 720  | 25  | 198 | 1.49200467 | 9.613526112 | 2.687813634  | Up   | 9.32E-12 | 2.08E-11 | AAEL011715-PA OS=Aedes aegypti GN=AAEL011715 PE=4 SV=1         |
| CCG016259.1 | 969  | 32  | 198 | 1.41902116 | 7.143177297 | 2.331669824  | Up   | 1.77E-13 | 5.16E-13 | AAEL014018-PA OS=Aedes aegypti GN=AAEL014018 PE=4 SV=1         |
| CCG004855.1 | 785  | 35  | 198 | 1.91584804 | 8.817501657 | 2.202386807  | Up   | 6.39E-14 | 2.11E-13 | AAEL008550-PA OS=Aedes aegypti GN=AAEL008550 PE=4 SV=1         |
| CCG003774.2 | 946  | 61  | 198 | 2.7707757  | 7.316848627 | 1.400932486  | Up   | 1.27E-12 | 3.10E-12 | AAEL011007-PA OS=Aedes aegypti GN=AAEL011007 PE=4 SV=1         |
| CCG023012.1 | 863  | 62  | 198 | 3.0870493  | 8.02055481  | 1.377473514  | Up   | 2.23E-12 | 5.30E-12 | -                                                              |
| CCG007923.1 | 1260 | 65  | 198 | 2.21669266 | 5.493443493 | 1.309302011  | Up   | 1.54E-11 | 3.40E-11 | AAEL006870-PA OS=Aedes aegypti GN=AAEL006870 PE=4 SV=1         |
| CCG008599.1 | 484  | 65  | 198 | 5.77072882 | 14.30111323 | 1.309302011  | Up   | 1.54E-11 | 3.40E-11 | AAEL004272-PA OS=Aedes aegypti GN=AAEL004272 PE=4 SV=1         |

|             |      |     |     |            |             |              |      |          |          |                                                                                          |
|-------------|------|-----|-----|------------|-------------|--------------|------|----------|----------|------------------------------------------------------------------------------------------|
| CCG000062.1 | 774  | 405 | 198 | 22.4841635 | 8.942814988 | -1.330108274 | Down | 2.93E-28 | 1.22E-27 | AAEL008753-PA OS=Aedes aegypti GN=AAEL008753 PE=4 SV=1                                   |
| CCG000432.1 | 3228 | 488 | 198 | 6.49604414 | 2.144280917 | -1.599067514 | Down | 5.57E-44 | 2.53E-43 | AAEL012287-PA OS=Aedes aegypti GN=AAEL012287 PE=3 SV=1                                   |
| CCG027889.1 | 4219 | 575 | 198 | 5.85626864 | 1.640611235 | -1.835748322 | Down | 2.41E-62 | 1.17E-61 | AAEL004488-PA OS=Aedes aegypti GN=AAEL004488 PE=3 SV=1                                   |
| CCG002612.1 | 306  | 658 | 198 | 92.3989718 | 22.62006144 | -2.03027395  | Down | 3.13E-81 | 1.59E-80 | AAEL011992-PA OS=Aedes aegypti GN=AAEL011992 PE=4 SV=1                                   |
| CCG027565.1 | 1758 | 0   | 199 | 0.001      | 3.957165573 | 11.95025172  | Up   | 4.44E-16 | 1.65E-15 | 60 kDa chaperonin OS=Wolbachia endosymbiont of Drosophila ananassae GN=groL PE=3 SV=1    |
| CCG005093.1 | 399  | 7   | 199 | 0.75385499 | 17.43533102 | 4.531582902  | Up   | 4.31E-06 | 7.70E-06 | -                                                                                        |
| CCG004078.1 | 1023 | 8   | 199 | 0.33602921 | 6.800290399 | 4.338937824  | Up   | 2.19E-06 | 3.96E-06 | AAEL015060-PA (Fragment) OS=Aedes aegypti GN=AAEL015060 PE=4 SV=1                        |
| CCG015151.1 | 1022 | 14  | 199 | 0.5886265  | 6.806944303 | 3.531582902  | Up   | 3.07E-08 | 6.01E-08 | Late trypsin OS=Aedes albopictus PE=3 SV=1                                               |
| CCG015827.1 | 1185 | 15  | 199 | 0.54392069 | 5.870630445 | 3.432047229  | Up   | 1.48E-08 | 2.93E-08 | AAEL002244-PA OS=Aedes aegypti GN=AAEL002244 PE=4 SV=1                                   |
| CCG005097.1 | 1314 | 20  | 199 | 0.65402945 | 5.294290013 | 3.017009729  | Up   | 3.69E-10 | 7.72E-10 | AAEL012582-PA OS=Aedes aegypti GN=AAEL012582 PE=4 SV=1                                   |
| CCG013206.1 | 654  | 29  | 199 | 1.90538579 | 10.63715149 | 2.480956829  | Up   | 6.66E-13 | 1.69E-12 | AAEL001631-PA OS=Aedes aegypti GN=AAEL001631 PE=4 SV=1                                   |
| CCG005106.1 | 606  | 45  | 199 | 3.19082188 | 11.47969815 | 1.847084728  | Up   | 0        | 0        | Putative uncharacterized protein OS=Culex quinquefasciatus GN=CpipJ_CPIJ003834 PE=4 SV=1 |
| CCG002580.1 | 1155 | 48  | 199 | 1.7857552  | 6.023114353 | 1.753975324  | Up   | 5.35E-14 | 1.80E-13 | AAEL013357-PA OS=Aedes aegypti GN=AAEL013357 PE=4 SV=1                                   |
| CCG009212.1 | 678  | 53  | 199 | 3.35899105 | 10.26061516 | 1.61101737   | Up   | 0        | 0        | AAEL012258-PA OS=Aedes aegypti GN=AAEL012258 PE=4 SV=1                                   |
| CCG008147.1 | 731  | 59  | 199 | 3.46814547 | 9.516685469 | 1.456294775  | Up   | 2.20E-13 | 6.31E-13 | Inhibitor of growth protein 4 OS=Harpegnathos saltator GN=EAI_01644 PE=4 SV=1            |
| CCG018381.1 | 621  | 344 | 199 | 23.8028804 | 11.20241075 | -1.08732693  | Down | 5.15E-18 | 1.97E-17 | AAEL001509-PA OS=Aedes aegypti GN=AAEL001509 PE=4 SV=1                                   |

|             |      |      |     |            |             |              |      |           |           |                                                                                          |
|-------------|------|------|-----|------------|-------------|--------------|------|-----------|-----------|------------------------------------------------------------------------------------------|
| CCG011234.1 | 1341 | 385  | 199 | 12.3365756 | 5.18769357  | -1.249776811 | Down | 1.37E-24  | 5.55E-24  | AAEL009020-PA OS=Aedes aegypti GN=GSTT3 PE=3 SV=2                                        |
| CCG015891.1 | 1524 | 438  | 199 | 12.3495694 | 4.564761862 | -1.435849235 | Down | 5.14E-34  | 2.21E-33  | AAEL015201-PA OS=Aedes aegypti GN=AAEL015201 PE=4 SV=1                                   |
| CCG021413.1 | 1461 | 453  | 199 | 13.3232647 | 4.761599642 | -1.484429416 | Down | 7.58E-37  | 3.32E-36  | AAEL009920-PA OS=Aedes aegypti GN=AAEL009920 PE=4 SV=1                                   |
| CCG001668.1 | 6303 | 463  | 199 | 3.1564314  | 1.103712054 | -1.515930559 | Down | 9.03E-39  | 4.01E-38  | AAEL005529-PA OS=Aedes aegypti GN=AAEL005529 PE=4 SV=1                                   |
| CCG001039.1 | 3275 | 1253 | 199 | 16.4400237 | 2.124182314 | -2.952232875 | Down | 7.24E-238 | 4.43E-237 | AAEL001627-PA OS=Aedes aegypti GN=UAP PE=2 SV=1                                          |
| CCG014931.1 | 2274 | 2878 | 199 | 54.3829799 | 3.059233543 | -4.151913052 | Down | 0         | 0         | AAEL010921-PA OS=Aedes aegypti GN=AAEL010921 PE=4 SV=1                                   |
| CCG002167.1 | 1236 | 0    | 200 | 0.001      | 5.656679089 | 12.46573961  | Up   | 4.44E-16  | 1.65E-15  | AAEL005842-PA OS=Aedes aegypti GN=AAEL005842 PE=4 SV=1                                   |
| CCG014703.1 | 858  | 20   | 200 | 1.00162552 | 8.148782464 | 3.024241299  | Up   | 3.69E-10  | 7.73E-10  | AAEL007801-PA OS=Aedes aegypti GN=AAEL007801 PE=4 SV=1                                   |
| CCG028403.1 | 2081 | 21   | 200 | 0.43362058 | 3.359757499 | 2.953851971  | Up   | 1.76E-10  | 3.72E-10  | -                                                                                        |
| CCG015613.1 | 975  | 24   | 200 | 1.05771654 | 7.170928569 | 2.761206893  | Up   | 1.93E-11  | 4.23E-11  | AAEL012361-PA OS=Aedes aegypti GN=AAEL012361 PE=4 SV=1                                   |
| CCG024625.1 | 1440 | 30   | 200 | 0.8952028  | 4.855316218 | 2.439278798  | Up   | 3.71E-13  | 9.94E-13  | AAEL002292-PA OS=Aedes aegypti GN=AAEL002292 PE=4 SV=1                                   |
| CCG016376.1 | 999  | 35   | 200 | 1.50544616 | 6.998654008 | 2.216886377  | Up   | 6.39E-14  | 2.11E-13  | Putative uncharacterized protein OS=Culex quinquefasciatus GN=CpipJ_CPIJ013990 PE=4 SV=1 |
| CCG009063.1 | 756  | 44   | 200 | 2.50088402 | 9.248221368 | 1.886737775  | Up   | 3.91E-14  | 1.34E-13  | AAEL007247-PA OS=Aedes aegypti GN=AAEL007247 PE=4 SV=1                                   |
| CCG013131.1 | 1836 | 46   | 200 | 1.07658376 | 3.808091152 | 1.822607438  | Up   | 3.40E-14  | 1.18E-13  | AAEL006445-PA OS=Aedes aegypti GN=AAEL006445 PE=4 SV=1                                   |
| CCG006849.1 | 612  | 53   | 200 | 3.72123519 | 11.42427345 | 1.618248939  | Up   | 0         | 0         | AAEL013347-PA OS=Aedes aegypti GN=AAEL013347 PE=3 SV=1                                   |
| CCG025162.1 | 959  | 57   | 200 | 2.5539884  | 7.29056867  | 1.513279379  | Up   | 4.09E-14  | 1.40E-13  | AAEL001717-PA OS=Aedes aegypti GN=AAEL001717 PE=4 SV=1                                   |
| CCG023153.3 | 2361 | 352  | 200 | 6.40633062 | 2.961311035 | -1.113262225 | Down | 4.67E-19  | 1.80E-18  | AAEL006535-PA OS=Aedes aegypti GN=AAEL006535 PE=4 SV=1                                   |

|             |      |      |     |            |             |              |      |           |           |                                                                                                 |
|-------------|------|------|-----|------------|-------------|--------------|------|-----------|-----------|-------------------------------------------------------------------------------------------------|
| CCG015902.1 | 1620 | 371  | 200 | 9.84059972 | 4.315836639 | -1.189105983 | Down | 4.56E-22  | 1.81E-21  | AAEL011756-PA OS=Aedes aegypti GN=AAEL011756 PE=3 SV=1                                          |
| CCG010222.1 | 1413 | 416  | 200 | 12.6506791 | 4.948092961 | -1.354270325 | Down | 9.34E-30  | 3.93E-29  | AAEL012440-PA OS=Aedes aegypti GN=AAEL012440 PE=4 SV=1                                          |
| CCG003063.1 | 3126 | 716  | 200 | 9.84207613 | 2.236613997 | -2.137646384 | Down | 2.95E-94  | 1.55E-93  | AAEL009547-PA OS=Aedes aegypti GN=AAEL009547 PE=3 SV=1                                          |
| CCG014540.1 | 2790 | 770  | 200 | 11.8590307 | 2.505969661 | -2.242545242 | Down | 1.75E-107 | 9.38E-107 | AAEL009795-PA OS=Aedes aegypti GN=AAEL009795 PE=4 SV=1                                          |
| CCG008490.1 | 4413 | 3103 | 200 | 30.2141596 | 1.584331601 | -4.253278588 | Down | 0         | 0         | Putative uncharacterized protein OS=Culex quinquefasciatus GN=CpipJ_CPIJ016210 PE=4 SV=1        |
| CCG010881.1 | 561  | 22   | 201 | 1.68508763 | 12.52515799 | 2.893933276  | Up   | 8.38E-11  | 1.80E-10  | AAEL003435-PA OS=Aedes aegypti GN=AAEL003435 PE=4 SV=1                                          |
| CCG012440.1 | 777  | 35   | 201 | 1.93557363 | 9.043260787 | 2.224081878  | Up   | 6.39E-14  | 2.11E-13  | Putative uncharacterized protein OS=Culex quinquefasciatus GN=CpipJ_CPIJ000877 PE=4 SV=1        |
| CCG017312.1 | 1075 | 66   | 201 | 2.63814185 | 6.536384773 | 1.308970776  | Up   | 1.07E-11  | 2.37E-11  | AAEL002324-PA OS=Aedes aegypti GN=AAEL002324 PE=4 SV=1                                          |
| CCG025376.1 | 876  | 77   | 201 | 3.77702005 | 8.021248437 | 1.086578354  | Up   | 4.45E-09  | 8.98E-09  | AAEL011017-PA OS=Aedes aegypti GN=AAEL011017 PE=4 SV=1                                          |
| CCG012953.1 | 661  | 435  | 201 | 28.2781158 | 10.63027781 | -1.411506696 | Down | 5.73E-33  | 2.45E-32  | -                                                                                               |
| CCG009147.1 | 3336 | 1289 | 201 | 16.6031139 | 2.10629905  | -2.978671653 | Down | 6.64E-247 | 4.08E-246 | AAEL003331-PA OS=Aedes aegypti GN=AAEL003331 PE=4 SV=2                                          |
| CCG003120.1 | 603  | 13   | 202 | 0.92637902 | 11.71073285 | 3.660084968  | Up   | 6.34E-08  | 1.23E-07  | AAEL003010-PA OS=Aedes aegypti GN=AAEL003010 PE=4 SV=1                                          |
| CCG012316.1 | 3127 | 26   | 202 | 0.35727953 | 2.258257726 | 2.660084968  | Up   | 4.60E-12  | 1.05E-11  | AGAP005525-PA OS=Anopheles gambiae GN=AGAP005525 PE=4 SV=1                                      |
| CCG015478.1 | 543  | 27   | 202 | 2.13661664 | 13.00473648 | 2.605637184  | Up   | 2.28E-12  | 5.41E-12  | -                                                                                               |
| CCG020719.1 | 1605 | 51   | 202 | 1.36539344 | 4.399733276 | 1.688099345  | Up   | 0         | 0         | AAEL003172-PA OS=Aedes aegypti GN=AAEL003172 PE=4 SV=1                                          |
| CCG010985.1 | 2001 | 63   | 202 | 1.35287021 | 3.529021443 | 1.383244763  | Up   | 1.16E-12  | 2.83E-12  | Testis-specific serine/threonine kinase OS=Culex quinquefasciatus GN=CpipJ_CPIJ001596 PE=4 SV=1 |



|             |      |      |     |            |             |              |      |           |           |                                                                                          |
|-------------|------|------|-----|------------|-------------|--------------|------|-----------|-----------|------------------------------------------------------------------------------------------|
| CCG004075.1 | 561  | 335  | 202 | 25.6592889 | 12.58747221 | -1.027492599 | Down | 3.71E-16  | 1.39E-15  | AAEL015061-PA OS=Aedes aegypti GN=AAEL015061 PE=4 SV=1                                   |
| CCG015324.1 | 1613 | 343  | 202 | 9.13739552 | 4.377911908 | -1.06154008  | Down | 2.47E-17  | 9.39E-17  | AAEL015267-PA OS=Aedes aegypti GN=AAEL013267 PE=4 SV=1                                   |
| CCG009244.1 | 921  | 374  | 202 | 17.4491648 | 7.667287631 | -1.186369773 | Down | 3.71E-22  | 1.47E-21  | AAEL012425-PA OS=Aedes aegypti GN=AAEL012425 PE=4 SV=1                                   |
| CCG016934.1 | 3972 | 388  | 202 | 4.19744638 | 1.777837842 | -1.239388156 | Down | 1.83E-24  | 7.39E-24  | AAEL011178-PA OS=Aedes aegypti GN=AAEL011178 PE=4 SV=1                                   |
| CCG008690.1 | 1194 | 762  | 202 | 27.422896  | 5.914214328 | -2.213122501 | Down | 1.17E-104 | 6.26E-104 | AAEL005611-PA OS=Aedes aegypti GN=AAEL003611 PE=3 SV=1                                   |
| CCG004589.1 | 1236 | 8    | 203 | 0.27812126 | 5.741529276 | 4.367649121  | Up   | 2.19E-06  | 3.97E-06  | AAEL000721-PA OS=Aedes aegypti GN=AAEL000721 PE=4 SV=1                                   |
| CCG020036.1 | 609  | 13   | 203 | 0.91725213 | 11.65275892 | 3.667209403  | Up   | 6.34E-08  | 1.23E-07  | AAEL010194-PA OS=Aedes aegypti GN=AAEL010194 PE=4 SV=1                                   |
| CCG022937.1 | 1038 | 18   | 203 | 0.74513991 | 6.836734282 | 3.19772412   | Up   | 1.62E-09  | 3.33E-09  | AAEL014289-PA OS=Aedes aegypti GN=AAEL014289 PE=4 SV=1                                   |
| CCG016565.1 | 894  | 19   | 203 | 0.91322702 | 7.937953227 | 3.119721608  | Up   | 7.73E-10  | 1.61E-09  | AAEL013902-PA OS=Aedes aegypti GN=AAEL013902 PE=4 SV=1                                   |
| CCG021673.1 | 605  | 39   | 203 | 2.76994983 | 11.72980196 | 2.082246902  | Up   | 7.33E-14  | 2.37E-13  | -                                                                                        |
| CCG010490.1 | 414  | 54   | 203 | 5.60474799 | 17.14137726 | 1.612761619  | Up   | 0         | 0         | -                                                                                        |
| CCG022047.1 | 1986 | 55   | 203 | 1.18999769 | 3.573278039 | 1.586289407  | Up   | 0         | 0         | AAEL009512-PA OS=Aedes aegypti GN=AAEL009512 PE=4 SV=1                                   |
| CCG005174.1 | 984  | 64   | 203 | 2.79477949 | 7.211920919 | 1.367649121  | Up   | 1.56E-12  | 3.77E-12  | AAEL004376-PA OS=Aedes aegypti GN=AAEL004376 PE=4 SV=1                                   |
| CCG008798.1 | 2437 | 76   | 203 | 1.34004917 | 2.911994331 | 1.119721608  | Up   | 1.54E-09  | 3.16E-09  | AAEL005091-PA OS=Aedes aegypti GN=AAEL005091 PE=4 SV=1                                   |
| CCG012600.1 | 2820 | 346  | 203 | 5.27217311 | 2.516500066 | -1.066979107 | Down | 1.32E-17  | 5.03E-17  | Putative uncharacterized protein OS=Culex quinquefasciatus GN=CpipJ_CPIJ005448 PE=4 SV=1 |
| CCG027790.1 | 1986 | 1391 | 203 | 30.0961233 | 3.573278039 | -3.074257584 | Down | 5.89E-275 | 3.67E-274 | AAEL003316-PA OS=Aedes aegypti GN=AAEL003316 PE=4 SV=1                                   |
| CCG003734.2 | 1191 | 22   | 204 | 0.79373145 | 5.987815669 | 2.915306927  | Up   | 8.38E-11  | 1.80E-10  | AAEL005406-PA OS=Aedes aegypti GN=AAEL005406 PE=4 SV=1                                   |

|             |      |     |     |            |             |              |      |          |          |                                                                             |
|-------------|------|-----|-----|------------|-------------|--------------|------|----------|----------|-----------------------------------------------------------------------------|
| CCG009562.2 | 1158 | 37  | 204 | 1.37295352 | 6.158452903 | 2.16528518   | Up   | 5.17E-14 | 1.74E-13 | AGAP009500-PA (Fragment)<br>OS=Anopheles gambiae<br>GN=AGAP009500 PE=3 SV=4 |
| CCG009882.1 | 828  | 41  | 204 | 2.1277284  | 8.61290877  | 2.017186541  | Up   | 1.02E-13 | 3.20E-13 | AAEL010949-PA OS=Aedes<br>aegypti GN=AAEL010949 PE=4<br>SV=1                |
| CCG002686.1 | 516  | 47  | 204 | 3.91390994 | 13.82071407 | 1.820149694  | Up   | 0        | 0        | AAEL000772-PA OS=Aedes<br>aegypti GN=AAEL000772 PE=4<br>SV=1                |
| CCG009323.1 | 835  | 49  | 204 | 2.52157724 | 8.540704744 | 1.760028702  | Up   | 0        | 0        | Survivin OS=Culex<br>quinquefasciatus<br>GN=CpipJ_CPIJ002689 PE=4<br>SV=1   |
| CCG004434.1 | 1359 | 404 | 204 | 12.7739314 | 5.247600045 | -1.283472937 | Down | 9.37E-27 | 3.87E-26 | AGAP007868-PA OS=Anopheles<br>gambiae GN=AGAP007868 PE=4<br>SV=2            |
| CCG000799.1 | 1716 | 8   | 205 | 0.2003251  | 4.176251013 | 4.381793303  | Up   | 2.19E-06 | 3.97E-06 | AAEL014814-PA OS=Aedes<br>aegypti GN=AAEL014814 PE=4<br>SV=1                |
| CCG015614.1 | 1236 | 9   | 205 | 0.31288642 | 5.798096067 | 4.211868302  | Up   | 1.09E-06 | 2.01E-06 | AAEL009445-PA OS=Aedes<br>aegypti GN=AAEL009445 PE=4<br>SV=1                |
| CCG000183.1 | 1038 | 10  | 205 | 0.41396661 | 6.90409127  | 4.059865208  | Up   | 5.43E-07 | 1.01E-06 | AAEL002980-PA OS=Aedes<br>aegypti GN=AAEL002980 PE=4<br>SV=1                |
| CCG010488.1 | 1005 | 19  | 205 | 0.81236314 | 7.130792774 | 3.13386579   | Up   | 7.73E-10 | 1.60E-09 | AAEL013286-PA (Fragment)<br>OS=Aedes aegypti<br>GN=AAEL013286 PE=4 SV=1     |
| CCG028020.2 | 774  | 54  | 205 | 2.99788846 | 9.258975114 | 1.626905801  | Up   | 0        | 0        | AAEL013197-PA OS=Aedes<br>aegypti GN=AAEL013197 PE=4<br>SV=1                |
| CCG022241.2 | 996  | 60  | 205 | 2.58853823 | 7.195227649 | 1.474902708  | Up   | 0        | 0        | AAEL012398-PA OS=Aedes<br>aegypti GN=AAEL012398 PE=4<br>SV=1                |
| CCG024499.1 | 786  | 65  | 205 | 3.55347678 | 9.117616715 | 1.35942549   | Up   | 1.58E-12 | 3.81E-12 | AAEL004867-PA OS=Aedes<br>aegypti GN=AAEL004867 PE=4<br>SV=1                |
| CCG014276.1 | 1689 | 398 | 205 | 10.125491  | 4.243011686 | -1.254831317 | Down | 1.62E-25 | 6.61E-25 | AAEL012981-PA OS=Aedes<br>aegypti GN=AAEL012981 PE=4<br>SV=1                |
| CCG006595.1 | 1056 | 478 | 205 | 19.4503155 | 6.786407896 | -1.519073505 | Down | 4.33E-40 | 1.93E-39 | AAEL000327-PA OS=Aedes<br>aegypti GN=AAEL000327 PE=4<br>SV=1                |
| CCG025378.1 | 2667 | 578 | 205 | 9.31252591 | 2.687081642 | -1.793132379 | Down | 1.07E-60 | 5.16E-60 | AAEL003890-PA OS=Aedes<br>aegypti GN=AAEL003890 PE=3<br>SV=1                |

|             |      |      |     |            |             |              |      |           |           |                                                                                          |
|-------------|------|------|-----|------------|-------------|--------------|------|-----------|-----------|------------------------------------------------------------------------------------------|
| CCG014610.1 | 2198 | 644  | 205 | 12.5898585 | 3.260439826 | -1.949123575 | Down | 2.06E-75  | 1.04E-74  | AAEL005678-PA OS=Aedes aegypti GN=AAEL005678 PE=4 SV=1                                   |
| CCG007425.1 | 957  | 649  | 205 | 29.1403947 | 7.488450092 | -1.960281365 | Down | 1.48E-76  | 7.43E-76  | AAEL004096-PA OS=Aedes aegypti GN=AAEL004096 PE=4 SV=1                                   |
| CCG011921.1 | 717  | 1172 | 205 | 70.2378368 | 9.995044265 | -2.812963551 | Down | 1.46E-211 | 8.79E-211 | AAEL006297-PA OS=Aedes aegypti GN=AAEL006297 PE=4 SV=1                                   |
| CCG004125.1 | 768  | 35   | 206 | 1.95825613 | 9.376829447 | 2.259530714  | Up   | 6.39E-14  | 2.11E-13  | AAEL005705-PA OS=Aedes aegypti GN=AAEL005705 PE=4 SV=1                                   |
| CCG027192.1 | 1338 | 43   | 206 | 1.38094065 | 5.382216005 | 1.962548976  | Up   | 8.46E-14  | 2.71E-13  | AAEL003700-PA OS=Aedes aegypti GN=AAEL003700 PE=4 SV=1                                   |
| CCG017083.1 | 762  | 53   | 206 | 2.98870858 | 9.450662749 | 1.660893276  | Up   | 0         | 0         | AAEL006676-PA OS=Aedes aegypti GN=AAEL006676 PE=4 SV=1                                   |
| CCG027906.1 | 1194 | 62   | 206 | 2.23125925 | 6.031327483 | 1.434617421  | Up   | 1.33E-15  | 4.84E-15  | AAEL015115-PA OS=Aedes aegypti GN=AAEL015115 PE=4 SV=1                                   |
| CCG019495.2 | 708  | 69   | 206 | 4.18772837 | 10.17147601 | 1.280289274  | Up   | 1.36E-11  | 3.01E-11  | AAEL004291-PA OS=Aedes aegypti GN=AAEL004291 PE=4 SV=1                                   |
| CCG005189.2 | 610  | 542  | 206 | 38.1796658 | 11.80558199 | -1.69333531  | Down | 1.02E-52  | 4.81E-52  | AAEL000711-PA OS=Aedes aegypti GN=AAEL000711 PE=4 SV=1                                   |
| CCG015450.1 | 1602 | 1627 | 206 | 43.6402985 | 4.495259061 | -3.279184805 | Down | 0         | 0         | AAEL008125-PA OS=Aedes aegypti GN=AAEL008125 PE=4 SV=1                                   |
| CCG008239.3 | 1404 | 2285 | 206 | 69.932937  | 5.129205851 | -3.769164719 | Down | 0         | 0         | AGAP000697-PA OS=Anopheles gambiae GN=AgaP_AGAP000697 PE=4 SV=4                          |
| CCG027471.1 | 456  | 3    | 207 | 0.28269562 | 15.86921775 | 5.810837661  | Up   | 5.28E-05  | 8.85E-05  | Putative uncharacterized protein OS=Culex quinquefasciatus GN=CpipJ_CPIJ000199 PE=4 SV=1 |
| CCG026731.1 | 392  | 9    | 207 | 0.98655003 | 18.46011044 | 4.22587516   | Up   | 1.09E-06  | 2.01E-06  | AAEL003821-PA OS=Aedes aegypti GN=AAEL003821 PE=4 SV=1                                   |
| CCG015442.2 | 1722 | 10   | 207 | 0.24953388 | 4.202301563 | 4.073872066  | Up   | 5.43E-07  | 1.01E-06  | AAEL011836-PA OS=Aedes aegypti GN=AAEL011836 PE=4 SV=1                                   |
| CCG011888.1 | 1073 | 24   | 207 | 0.96111242 | 6.744047802 | 2.810837661  | Up   | 1.93E-11  | 4.24E-11  | AAEL008623-PA OS=Aedes aegypti GN=AAEL008623 PE=4 SV=1                                   |
| CCG026118.1 | 831  | 36   | 207 | 1.86150475 | 8.708018402 | 2.22587516   | Up   | 6.13E-14  | 2.03E-13  | AAEL014815-PA (Fragment) OS=Aedes aegypti GN=AAEL014815 PE=4 SV=1                        |

|             |      |     |     |            |             |             |      |           |           |                                                                                          |
|-------------|------|-----|-----|------------|-------------|-------------|------|-----------|-----------|------------------------------------------------------------------------------------------|
| CCG000548.1 | 1034 | 48  | 207 | 1.99472656 | 6.99841711  | 1.810837661 | Up   | 5.35E-14  | 1.80E-13  | AAEL001717-PA OS=Aedes aegypti GN=AAEL001717 PE=4 SV=1                                   |
| CCG022788.1 | 912  | 50  | 207 | 2.35579685 | 7.934608873 | 1.751943972 | Up   | 0         | 0         | AAEL005279-PA OS=Aedes aegypti GN=AAEL005279 PE=4 SV=1                                   |
| CCG012808.1 | 558  | 54  | 207 | 4.15836141 | 12.968393   | 1.640912659 | Up   | 0         | 0         | AAEL007902-PA OS=Aedes aegypti GN=AAEL007902 PE=4 SV=1                                   |
| CCG004744.1 | 900  | 67  | 207 | 3.19885802 | 8.040403658 | 1.329710971 | Up   | 2.82E-12  | 6.61E-12  | AAEL008081-PA OS=Aedes aegypti GN=AAEL008081 PE=4 SV=1                                   |
| CCG010890.1 | 1738 | 511 | 207 | 12.6337942 | 4.163615243 | -1.60137932 | Down | 4.57E-46  | 2.10E-45  | -                                                                                        |
| CCG014791.1 | 2337 | 744 | 207 | 13.6797101 | 3.096432731 | -2.14335865 | Down | 3.35E-98  | 1.77E-97  | AAEL006201-PA OS=Aedes aegypti GN=AAEL006201 PE=4 SV=1                                   |
| CCG006219.1 | 2607 | 853 | 207 | 14.0595257 | 2.775743495 | -2.34060177 | Down | 2.94E-125 | 1.62E-124 | Putative uncharacterized protein OS=Culex quinquefasciatus GN=CpipJ_CPIJ013200 PE=4 SV=1 |
| CCG022736.1 | 405  | 0   | 208 | 0.001      | 17.95388042 | 14.13200807 | Up   | 4.44E-16  | 1.63E-15  | AAEL007013-PA OS=Aedes aegypti GN=AAEL007013 PE=4 SV=1                                   |
| CCG002330.1 | 504  | 7   | 208 | 0.59680187 | 14.42722533 | 4.595398    | Up   | 4.31E-06  | 7.70E-06  | -                                                                                        |
| CCG003580.1 | 488  | 12  | 208 | 1.05663282 | 14.90024912 | 3.817790421 | Up   | 1.30E-07  | 2.49E-07  | AAEL010999-PA OS=Aedes aegypti GN=AAEL010999 PE=4 SV=1                                   |
| CCG019797.1 | 1539 | 30  | 208 | 0.83761666 | 4.724705373 | 2.495862326 | Up   | 3.71E-13  | 9.94E-13  | AGAP000928-PA OS=Anopheles gambiae GN=AGAP000928 PE=4 SV=3                               |
| CCG020423.1 | 448  | 45  | 208 | 4.31615638 | 16.2306285  | 1.910899826 | Up   | 0         | 0         | -                                                                                        |
| CCG006908.1 | 897  | 48  | 208 | 2.29938379 | 8.106267078 | 1.817790421 | Up   | 5.35E-14  | 1.80E-13  | Methionine aminopeptidase OS=Aedes aegypti GN=AAEL013150 PE=3 SV=1                       |
| CCG026154.1 | 847  | 49  | 208 | 2.48585242 | 8.58479524  | 1.788043078 | Up   | 0         | 0         | AAEL003817-PA OS=Aedes aegypti GN=AAEL003817 PE=2 SV=1                                   |
| CCG023677.2 | 1245 | 59  | 208 | 2.03631674 | 5.840418931 | 1.520109873 | Up   | 0         | 0         | AAEL006413-PA OS=Aedes aegypti GN=AAEL006413 PE=4 SV=1                                   |
| CCG011619.1 | 1134 | 62  | 208 | 2.3493153  | 6.412100149 | 1.448556612 | Up   | 0         | 0         | AAEL012592-PA OS=Aedes aegypti GN=AAEL012592 PE=4 SV=1                                   |
| CCG009911.1 | 1371 | 64  | 208 | 2.00588112 | 5.303662705 | 1.402752922 | Up   | 2.16E-13  | 6.19E-13  | AAEL010283-PA OS=Aedes aegypti GN=AAEL010283 PE=4 SV=1                                   |

|             |      |      |     |            |             |              |      |           |           |                                                                              |
|-------------|------|------|-----|------------|-------------|--------------|------|-----------|-----------|------------------------------------------------------------------------------|
| CCG020019.1 | 585  | 361  | 208 | 26.5163661 | 12.42960952 | -1.093102105 | Down | 5.60E-19  | 2.16E-18  | AAEL008315-PA OS=Aedes aegypti GN=AAEL008315 PE=4 SV=1                       |
| CCG008004.1 | 2766 | 398  | 208 | 6.18291915 | 2.62882197  | -1.233871699 | Down | 6.88E-25  | 2.79E-24  | AAEL002141-PA OS=Aedes aegypti GN=AAEL002141 PE=4 SV=1                       |
| CCG009446.1 | 1677 | 400  | 208 | 10.2491913 | 4.335910297 | -1.241103268 | Down | 3.18E-25  | 1.30E-24  | AAEL010676-PA (Fragment) OS=Aedes aegypti GN=AAEL010676 PE=4 SV=1            |
| CCG001054.1 | 1471 | 535  | 208 | 15.6280136 | 4.943114595 | -1.660642159 | Down | 1.15E-50  | 5.35E-50  | AAEL009513-PA (Fragment) OS=Aedes aegypti GN=AAEL009513 PE=4 SV=1            |
| CCG010398.1 | 3339 | 23   | 209 | 0.29598799 | 2.188164075 | 2.88611038   | Up   | 4.01E-11  | 8.66E-11  | AAEL011649-PA OS=Aedes aegypti GN=AAEL011649 PE=4 SV=1                       |
| CCG022355.1 | 1203 | 26   | 209 | 0.92868919 | 6.07338308  | 2.709232618  | Up   | 4.60E-12  | 1.05E-11  | AAEL001481-PA OS=Aedes aegypti GN=AAEL001481 PE=4 SV=1                       |
| CCG023095.1 | 1380 | 29   | 209 | 0.90298718 | 5.294405685 | 2.551691341  | Up   | 6.66E-13  | 1.69E-12  | AAEL007136-PA OS=Aedes aegypti GN=AAEL007136 PE=4 SV=1                       |
| CCG025668.1 | 618  | 34   | 209 | 2.36403071 | 11.8224593  | 2.322209495  | Up   | 8.82E-14  | 2.79E-13  | -                                                                            |
| CCG007191.1 | 327  | 50   | 209 | 6.57029581 | 22.34336344 | 1.765816146  | Up   | 0         | 0         | AAEL011433-PA OS=Aedes aegypti GN=AAEL011433 PE=4 SV=1                       |
| CCG019607.2 | 1024 | 59   | 209 | 2.47579526 | 7.135038912 | 1.527029287  | Up   | 0         | 0         | Putative integral membrane protein OS=Glossina morsitans morsitans PE=2 SV=1 |
| CCG004808.1 | 1510 | 67   | 209 | 1.90660412 | 4.838595924 | 1.343583145  | Up   | 1.40E-12  | 3.39E-12  | -                                                                            |
| CCG026759.1 | 674  | 74   | 209 | 4.71774534 | 10.84017781 | 1.20021897   | Up   | 9.38E-11  | 2.00E-10  | AAEL011974-PA OS=Aedes aegypti GN=AAEL011974 PE=4 SV=1                       |
| CCG008251.1 | 1119 | 379  | 209 | 14.5536456 | 6.529293874 | -1.156381702 | Down | 1.36E-21  | 5.38E-21  | AAEL005979-PA (Fragment) OS=Aedes aegypti GN=SCR3 PE=4 SV=2                  |
| CCG014240.1 | 3999 | 420  | 209 | 4.51295037 | 1.827026718 | -1.304573182 | Down | 2.00E-28  | 8.36E-28  | AAEL006849-PA (Fragment) OS=Aedes aegypti GN=AAEL006849 PE=4 SV=1            |
| CCG003601.1 | 1239 | 846  | 209 | 29.3401093 | 5.896916744 | -2.314841517 | Down | 1.37E-122 | 7.53E-122 | AAEL012646-PA OS=Aedes aegypti GN=AAEL012646 PE=4 SV=1                       |
| CCG028192.1 | 556  | 1090 | 209 | 84.2392279 | 13.14079109 | -2.680440084 | Down | 8.80E-187 | 5.20E-186 | -                                                                            |

|             |      |      |     |            |             |              |      |          |            |                                                                                                    |
|-------------|------|------|-----|------------|-------------|--------------|------|----------|------------|----------------------------------------------------------------------------------------------------|
| CCG010909.1 | 424  | 9    | 210 | 0.91209342 | 17.31424085 | 4.24663372   | Up   | 1.09E-06 | 2.01E-06   | Histone H2B OS=Aedes aegypti<br>GN=AAEL015674 PE=3 SV=1                                            |
| CCG009140.1 | 1697 | 24   | 210 | 0.60770397 | 4.3260095   | 2.831596221  | Up   | 1.93E-11 | 4.23E-11   | AAEL002785-PA OS=Aedes<br>aegypti GN=AAEL002785 PE=4<br>SV=1                                       |
| CCG001942.1 | 399  | 32   | 210 | 3.44619425 | 18.39909304 | 2.416558721  | Up   | 1.77E-13 | 5.16E-13   | AAEL002461-PA OS=Aedes<br>aegypti GN=AAEL002461 PE=4<br>SV=1                                       |
| CCG018672.1 | 1182 | 34   | 210 | 1.23601605 | 6.210861355 | 2.32909588   | Up   | 8.82E-14 | 2.80E-13   | AAEL009727-PA OS=Aedes<br>aegypti GN=AAEL009727 PE=4<br>SV=1                                       |
| CCG011897.1 | 990  | 78   | 210 | 3.38549424 | 7.415392043 | 1.131156503  | Up   | 5.85E-10 | 1.22E-09   | AAEL013769-PA OS=Aedes<br>aegypti GN=AAEL013769 PE=4<br>SV=1                                       |
| CCG016220.1 | 819  | 414  | 210 | 21.7209647 | 8.963660711 | -1.276928236 | Down | 3.59E-27 | 1.49E-26   | Pyrroline-5-carboxylate reductase<br>OS=Aedes aegypti<br>GN=AAEL007033 PE=3 SV=1                   |
| CCG025766.2 | 1221 | 491  | 210 | 17.2793937 | 6.012480035 | -1.523020493 | Down | 2.75E-41 | 1.23E-40   | AAEL014422-PA OS=Aedes<br>aegypti GN=AAEL014422 PE=4<br>SV=1                                       |
| CCG022487.1 | 1846 | 683  | 210 | 15.8983363 | 3.976835386 | -1.999183047 | Down | 1.42E-82 | 7.26E-82   | AAEL012184-PA OS=Aedes<br>aegypti GN=AAEL012184 PE=4<br>SV=1                                       |
| CCG010867.1 | 1794 | 719  | 210 | 17.2214265 | 4.092105977 | -2.073289239 | Down | 5.04E-91 | 2.62E-90   | Protease III zinc metalloprotease<br>OS=Culex quinquefasciatus<br>GN=CpipJ_CPIJ011546 PE=4<br>SV=1 |
| CCG021781.1 | 573  | 2902 | 210 | 217.623333 | 12.8119339  | -4.086273083 | Down | 0        | 0          | AAEL009066-PA OS=Aedes<br>aegypti GN=AAEL009066 PE=4<br>SV=1                                       |
| CCG004528.1 | 828  | 1    | 211 | 0.05189581 | 8.908449757 | 7.423412393  | Up   | 0.000587 | 0.00091632 | AAEL001690-PA OS=Aedes<br>aegypti GN=AAEL001690 PE=3<br>SV=1                                       |
| CCG027083.1 | 1911 | 18   | 211 | 0.40473847 | 3.859862061 | 3.253487391  | Up   | 1.62E-09 | 3.33E-09   | AAEL007475-PA OS=Aedes<br>aegypti GN=AAEL007475 PE=4<br>SV=1                                       |
| CCG003725.2 | 1200 | 25   | 211 | 0.8952028  | 6.146830332 | 2.779556203  | Up   | 9.32E-12 | 2.08E-11   | AAEL007816-PA OS=Aedes<br>aegypti GN=CYP4D23 PE=3<br>SV=1                                          |
| CCG002439.1 | 948  | 28   | 211 | 1.26914828 | 7.780797889 | 2.61605747   | Up   | 1.17E-12 | 2.86E-12   | AAEL011163-PA OS=Aedes<br>aegypti GN=AAEL011163 PE=4<br>SV=1                                       |
| CCG018363.1 | 1173 | 29   | 211 | 1.06233785 | 6.288317476 | 2.565431397  | Up   | 6.66E-13 | 1.69E-12   | AAEL008721-PA OS=Aedes<br>aegypti GN=AAEL008721 PE=4<br>SV=1                                       |
| CCG000613.1 | 972  | 38   | 211 | 1.67988674 | 7.588679423 | 2.175484879  | Up   | 4.26E-14 | 1.45E-13   | AAEL003384-PA OS=Aedes<br>aegypti GN=AAEL003384 PE=4<br>SV=1                                       |

|             |      |    |     |            |             |             |    |          |          |                                                                                           |
|-------------|------|----|-----|------------|-------------|-------------|----|----------|----------|-------------------------------------------------------------------------------------------|
| CCG024084.1 | 402  | 40 | 211 | 4.27559548 | 18.34874726 | 2.101484298 | Up | 6.86E-14 | 2.25E-13 | AAEL006551-FA OS=Aedes aegypti GN=AAEL006551 PE=4 SV=1                                    |
| CCG020017.1 | 618  | 41 | 211 | 2.85074291 | 11.93559288 | 2.065860388 | Up | 1.02E-13 | 3.19E-13 | AAEL008316-FA OS=Aedes aegypti GN=AAEL008316 PE=4 SV=1                                    |
| CCG005856.1 | 1935 | 45 | 211 | 0.99929615 | 3.811987803 | 1.931559296 | Up | 0        | 0        | AAEL011904-FA OS=Aedes aegypti GN=AAEL011904 PE=4 SV=1                                    |
| CCG002485.1 | 1330 | 48 | 211 | 1.55078741 | 5.54601233  | 1.838449892 | Up | 5.35E-14 | 1.80E-13 | Putative uncharacterized protein OS=Tribolium castaneum GN=TcasGA2_TC011569 PE=4 SV=1     |
| CCG017420.1 | 462  | 57 | 211 | 5.30146076 | 15.96579307 | 1.590522378 | Up | 0        | 0        | AAEL012071-FA OS=Aedes aegypti GN=AAEL012071 PE=4 SV=1                                    |
| CCG010238.1 | 228  | 65 | 211 | 12.2501436 | 32.35173859 | 1.401044579 | Up | 1.73E-13 | 5.06E-13 | AAEL002252-FA OS=Aedes aegypti GN=AAEL002252 PE=4 SV=1                                    |
| CCG023436.1 | 639  | 66 | 211 | 4.43818855 | 11.54334335 | 1.379018273 | Up | 1.69E-13 | 4.96E-13 | Exosomal 3'-5' exoribonuclease complex subunit ski4 (Fragment) OS=Aedes aegypti PE=2 SV=1 |
| CCG006939.1 | 712  | 74 | 211 | 4.46595556 | 10.3598264  | 1.213959027 | Up | 5.16E-11 | 1.11E-10 | AAEL011092-FA OS=Aedes aegypti GN=AAEL011092 PE=4 SV=1                                    |
| CCG000526.1 | 2223 | 82 | 211 | 1.58502845 | 3.318127035 | 1.065860388 | Up | 3.24E-09 | 6.59E-09 | Integrin beta (Fragment) OS=Aedes aegypti GN=AAEL001829 PE=3 SV=1                         |
| CCG022170.1 | 1723 | 38 | 212 | 0.94767842 | 4.301308576 | 2.182306145 | Up | 4.26E-14 | 1.45E-13 | AAEL002529-FA OS=Aedes aegypti GN=AAEL002529 PE=4 SV=1                                    |
| CCG003252.1 | 652  | 38 | 212 | 2.50437104 | 11.36680165 | 2.182306145 | Up | 4.26E-14 | 1.45E-13 | Defensin D (Fragment) OS=Aedes albopictus GN=DefD PE=2 SV=1                               |
| CCG011367.1 | 552  | 42 | 212 | 3.26943633 | 13.42600485 | 2.037916236 | Up | 7.66E-14 | 2.47E-13 | Putative uncharacterized protein OS=Culex quinquefasciatus GN=CpipJ_CPIJ013877 PE=4 SV=1  |
| CCG003782.1 | 1545 | 44 | 212 | 1.22373354 | 4.796863868 | 1.97080204  | Up | 3.91E-14 | 1.35E-13 | -                                                                                         |
| CCG015927.1 | 411  | 45 | 212 | 4.70471547 | 18.03200651 | 1.938380562 | Up | 0        | 0        | AAEL010634-FA OS=Aedes aegypti GN=AAEL010634 PE=4 SV=1                                    |
| CCG001568.1 | 919  | 48 | 212 | 2.2443387  | 8.064368526 | 1.845271158 | Up | 5.35E-14 | 1.79E-13 | Uncharacterized protein OS=Anopheles darlingi GN=AND_13864 PE=4 SV=1                      |

|             |      |      |     |            |             |              |      |           |           |                                                                                                       |
|-------------|------|------|-----|------------|-------------|--------------|------|-----------|-----------|-------------------------------------------------------------------------------------------------------|
| CCG008815.1 | 1076 | 75   | 212 | 2.99510232 | 6.887690219 | 1.201414968  | Up   | 6.63E-11  | 1.43E-10  | Thyroid hormone receptor-associated protein 6 OS=Culex quinquefasciatus GN=CpipJ_CPIJ004789 PE=4 SV=1 |
| CCG023114.1 | 1638 | 453  | 212 | 11.8835713 | 4.524514454 | -1.393133582 | Down | 1.29E-33  | 5.52E-33  | AAEL007036-FA OS=Aedes aegypti GN=AAEL007038 PE=4 SV=1                                                |
| CCG005277.1 | 3426 | 529  | 212 | 6.63484811 | 2.163209187 | -1.616890254 | Down | 2.80E-48  | 1.30E-47  | AAEL004222-FA OS=Aedes aegypti GN=AAEL004222 PE=3 SV=1                                                |
| CCG004977.1 | 1149 | 679  | 212 | 25.3929067 | 6.450091102 | -1.977034106 | Down | 6.52E-81  | 3.32E-80  | AAEL013984-FA OS=Aedes aegypti GN=AAEL013984 PE=4 SV=1                                                |
| CCG022450.1 | 1632 | 701  | 212 | 18.4569755 | 4.541148698 | -2.023036976 | Down | 5.08E-86  | 2.61E-85  | AAEL000788-FA OS=Aedes aegypti GN=AAEL000788 PE=4 SV=1                                                |
| CCG007503.1 | 730  | 0    | 213 | 0.001      | 10.20015473 | 13.31630342  | Up   | 4.44E-16  | 1.64E-15  | AAEL012453-FA OS=Aedes aegypti GN=AAEL012453 PE=4 SV=1                                                |
| CCG009604.1 | 885  | 14   | 213 | 0.67974721 | 8.413686952 | 3.629667902  | Up   | 3.07E-08  | 6.01E-08  | AAEL005577-FA OS=Aedes aegypti GN=AAEL005577 PE=4 SV=1                                                |
| CCG005256.1 | 1155 | 35   | 213 | 1.30211317 | 6.446851041 | 2.307739807  | Up   | 6.39E-14  | 2.11E-13  | AAEL011765-FA OS=Aedes aegypti GN=AAEL011765 PE=4 SV=1                                                |
| CCG010103.1 | 1097 | 36   | 213 | 1.41012803 | 6.787705517 | 2.267097823  | Up   | 6.13E-14  | 2.03E-13  | AAEL012855-FA OS=Aedes aegypti GN=AAEL012855 PE=4 SV=1                                                |
| CCG022931.2 | 8020 | 85   | 213 | 0.45541489 | 0.928443012 | 1.027631888  | Up   | 7.78E-09  | 1.56E-08  | AAEL003987-FA OS=Aedes aegypti GN=AAEL003987 PE=4 SV=1                                                |
| CCG011649.1 | 807  | 362  | 213 | 19.2751474 | 9.226905765 | -1.062823063 | Down | 3.06E-18  | 1.17E-17  | Veli, isoform C OS=Drosophila melanogaster GN=veli PE=4 SV=2                                          |
| CCG011793.1 | 904  | 377  | 213 | 17.9199004 | 8.236850611 | -1.121397889 | Down | 1.60E-20  | 6.27E-20  | AAEL013640-FA OS=Aedes aegypti GN=AAEL013640 PE=3 SV=1                                                |
| CCG023645.1 | 928  | 855  | 213 | 39.5895723 | 8.023828613 | -2.302757786 | Down | 4.37E-123 | 2.40E-122 | AAEL001447-FA OS=Aedes aegypti GN=AAEL001447 PE=4 SV=1                                                |
| CCG005162.1 | 1572 | 865  | 213 | 23.6442878 | 4.736713074 | -2.319533498 | Down | 1.31E-125 | 7.24E-125 | Partial acyl-CoA reductase 1 OS=Culex quinquefasciatus GN=CpipJ_CPIJ017921 PE=4 SV=1                  |
| CCG014885.1 | 858  | 1276 | 213 | 63.9037079 | 8.678453325 | -2.88038979  | Down | 4.84E-236 | 2.96E-235 | AAEL000153-FA OS=Aedes aegypti GN=AAEL000153 PE=4 SV=1                                                |
| CCG010904.1 | 443  | 0    | 214 | 0.001      | 16.88729397 | 14.04365055  | Up   | 4.44E-16  | 1.63E-15  | Histone H2B OS=Aedes aegypti GN=AAEL015674 PE=3 SV=1                                                  |



|             |      |      |     |            |             |              |      |           |           |                                                                                          |
|-------------|------|------|-----|------------|-------------|--------------|------|-----------|-----------|------------------------------------------------------------------------------------------|
| CCG017817.1 | 732  | 7    | 214 | 0.41091276 | 10.22004266 | 4.636425268  | Up   | 4.31E-06  | 7.71E-06  | AAEL007174-PA OS=Aedes aegypti GN=AAEL007174 PE=4 SV=1                                   |
| CCG024401.1 | 1819 | 25   | 214 | 0.5905681  | 4.112738444 | 2.799924     | Up   | 9.32E-12  | 2.08E-11  | AAEL002739-PA OS=Aedes aegypti GN=AAEL002739 PE=4 SV=1                                   |
| CCG010983.1 | 1382 | 35   | 214 | 1.08823496 | 5.413220861 | 2.314497173  | Up   | 6.39E-14  | 2.11E-13  | AAEL009798-PA OS=Aedes aegypti GN=AAEL009798 PE=4 SV=1                                   |
| CCG011129.1 | 1016 | 54   | 214 | 2.28382448 | 7.363259084 | 1.688892688  | Up   | 0         | 0         | AAEL003786-PA OS=Aedes aegypti GN=AAEL003786 PE=4 SV=1                                   |
| CCG011200.2 | 2628 | 57   | 214 | 0.93199196 | 2.84667855  | 1.610890176  | Up   | 0         | 0         | AAEL009432-PA OS=Aedes aegypti GN=SCRBQ3 PE=4 SV=2                                       |
| CCG013705.1 | 540  | 68   | 214 | 5.41100362 | 13.85383561 | 1.356317349  | Up   | 5.24E-13  | 1.35E-12  | Putative glycoprotein hormone-alpha2 OS=Aedes aegypti GN=gpa2 PE=2 SV=1                  |
| CCG025323.1 | 3069 | 647  | 214 | 9.05878732 | 2.437625034 | -1.893841712 | Down | 6.45E-73  | 3.22E-72  | Transporter OS=Aedes aegypti GN=AAEL003641 PE=3 SV=1                                     |
| CCG012433.1 | 1275 | 750  | 214 | 25.2763145 | 5.867506846 | -2.106966595 | Down | 7.56E-97  | 3.98E-96  | AAEL000024-PA OS=Aedes aegypti GN=AAEL000024 PE=4 SV=1                                   |
| CCG010161.1 | 560  | 1460 | 214 | 112.028237 | 13.35905577 | -3.067972464 | Down | 6.61E-288 | 4.14E-287 | -                                                                                        |
| CCG011450.1 | 5877 | 6795 | 214 | 49.6816993 | 1.272940485 | -5.286477645 | Down | 0         | 0         | Putative uncharacterized protein OS=Culex quinquefasciatus GN=CpipJ_CPIJ008587 PE=4 SV=1 |
| CCG001799.1 | 1134 | 4    | 215 | 0.15156873 | 6.627891981 | 5.450506053  | Up   | 2.95E-05  | 5.03E-05  | AAEL007686-PA OS=Aedes aegypti GN=AAEL007686 PE=4 SV=1                                   |
| CCG005284.1 | 3420 | 36   | 215 | 0.452313   | 2.197669446 | 2.280581052  | Up   | 6.13E-14  | 2.03E-13  | AAEL011780-PA OS=Aedes aegypti GN=AAEL011780 PE=3 SV=1                                   |
| CCG022706.1 | 1563 | 43   | 215 | 1.18214881 | 4.808720093 | 2.024241299  | Up   | 8.46E-14  | 2.70E-13  | AAEL012566-PA OS=Aedes aegypti GN=AAEL012566 PE=4 SV=1                                   |
| CCG004853.1 | 1689 | 62   | 215 | 1.5773378  | 4.449987866 | 1.496309743  | Up   | 0         | 0         | AAEL008522-PA OS=Aedes aegypti GN=AAEL008522 PE=4 SV=1                                   |
| CCG015963.1 | 813  | 74   | 215 | 3.91114436 | 9.244808741 | 1.241052688  | Up   | 1.54E-11  | 3.40E-11  | SCO1, mitochondrial OS=Culex quinquefasciatus GN=CpipJ_CPIJ003089 PE=4 SV=1              |
| CCG026085.1 | 1189 | 436  | 215 | 15.756774  | 6.321303201 | -1.317678271 | Down | 6.99E-30  | 2.94E-29  | AAEL015598-PA OS=Aedes aegypti GN=AAEL015598 PE=4 SV=1                                   |

|             |      |      |     |            |             |              |      |           |           |                                                                             |
|-------------|------|------|-----|------------|-------------|--------------|------|-----------|-----------|-----------------------------------------------------------------------------|
| CCG026933.1 | 2358 | 442  | 215 | 8.05454737 | 3.187459502 | -1.337396506 | Down | 6.13E-31  | 2.60E-30  | AAEL007804-PA (Fragment)<br>OS=Aedes aegypti<br>GN=AAEL007804 PE=4 SV=1     |
| CCG025135.1 | 2607 | 541  | 215 | 8.91700285 | 2.883018606 | -1.62897873  | Down | 7.45E-50  | 3.47E-49  | AAEL005645-PA OS=Aedes<br>aegypti GN=AAEL005645 PE=3<br>SV=1                |
| CCG019954.3 | 1089 | 1658 | 215 | 65.4213223 | 6.901771815 | -3.244722238 | Down | 0         | 0         | Phosphoserine aminotransferase<br>OS=Aedes aegypti PE=2 SV=1                |
| CCG006975.1 | 465  | 33   | 216 | 3.04946504 | 16.2386834  | 2.412806587  | Up   | 1.31E-13  | 4.01E-13  | AGAP008101-PA (Fragment)<br>OS=Anopheles gambiae<br>GN=AGAP008101 PE=4 SV=4 |
| CCG024927.1 | 552  | 68   | 216 | 5.2933731  | 13.67932569 | 1.369737865  | Up   | 2.44E-13  | 6.87E-13  | AAEL006134-PA OS=Aedes<br>aegypti GN=AAEL006134 PE=4<br>SV=1                |
| CCG026799.1 | 2076 | 87   | 216 | 1.80075477 | 3.637277352 | 1.01425721   | Up   | 8.83E-09  | 1.76E-08  | Transporter OS=Aedes aegypti<br>GN=AAEL015287 PE=3 SV=1                     |
| CCG024554.1 | 1494 | 15   | 217 | 0.43142304 | 5.077607804 | 3.556973841  | Up   | 1.48E-08  | 2.93E-08  | AAEL010046-PA OS=Aedes<br>aegypti GN=AAEL010046 PE=4<br>SV=1                |
| CCG010635.1 | 798  | 22   | 217 | 1.18462927 | 9.50619807  | 3.004432818  | Up   | 8.38E-11  | 1.80E-10  | AAEL010046-PA OS=Aedes<br>aegypti GN=AAEL010046 PE=4<br>SV=1                |
| CCG007887.2 | 642  | 23   | 217 | 1.53941417 | 11.81611536 | 2.94030248   | Up   | 4.01E-11  | 8.68E-11  | AAEL000692-PA OS=Aedes<br>aegypti GN=AAEL000692 PE=4<br>SV=1                |
| CCG014050.1 | 2022 | 23   | 217 | 0.48877542 | 3.751704283 | 2.94030248   | Up   | 4.01E-11  | 8.67E-11  | AAEL011477-PA OS=Aedes<br>aegypti GN=AAEL011477 PE=4<br>SV=1                |
| CCG021508.1 | 2991 | 23   | 217 | 0.33042591 | 2.536257459 | 2.94030248   | Up   | 4.01E-11  | 8.68E-11  | Uncharacterized protein<br>OS=Anopheles darlingi<br>GN=AND_07180 PE=4 SV=1  |
| CCG019604.1 | 1471 | 375  | 217 | 10.9542151 | 5.156999361 | -1.086882349 | Down | 1.74E-19  | 6.75E-19  | AAEL007363-PA OS=Aedes<br>aegypti GN=AAEL007363 PE=4<br>SV=1                |
| CCG002851.1 | 450  | 414  | 217 | 39.5321558 | 16.85765791 | -1.229622521 | Down | 1.08E-25  | 4.42E-25  | AAEL003459-PA OS=Aedes<br>aegypti GN=AAEL003459 PE=4<br>SV=1                |
| CCG009619.1 | 522  | 870  | 217 | 71.6162244 | 14.53246372 | -2.301007154 | Down | 4.27E-125 | 2.36E-124 | AAEL009627-PA OS=Aedes<br>aegypti GN=AAEL009627 PE=4<br>SV=1                |
| CCG018011.1 | 2274 | 7    | 218 | 0.13227271 | 3.351321168 | 4.663142607  | Up   | 4.31E-06  | 7.71E-06  | AAEL001477-PA OS=Aedes<br>aegypti GN=AAEL001477 PE=4<br>SV=1                |

|             |      |     |     |            |             |              |      |           |           |                                                                                                   |
|-------------|------|-----|-----|------------|-------------|--------------|------|-----------|-----------|---------------------------------------------------------------------------------------------------|
| CCG016179.1 | 1019 | 10  | 218 | 0.42168532 | 7.478807003 | 4.148569434  | Up   | 5.43E-07  | 1.01E-06  | Pol polyprotein (Fragment)<br>OS=Drosophila buzzatii GN=pol<br>PE=4 SV=1                          |
| CCG008689.1 | 984  | 19  | 218 | 0.82970016 | 7.74482148  | 3.222570015  | Up   | 7.73E-10  | 1.60E-09  | Putative uncharacterized protein<br>OS=Culex quinquefasciatus<br>GN=CpipJ_CPIJ010331 PE=4<br>SV=1 |
| CCG006043.1 | 399  | 20  | 218 | 2.15387141 | 19.10001087 | 3.148569434  | Up   | 3.69E-10  | 7.71E-10  | AAEL010832-PA OS=Aedes<br>aegypti GN=AAEL010832 PE=4<br>SV=1                                      |
| CCG017143.1 | 1929 | 39  | 218 | 0.86875047 | 3.950702092 | 2.18509531   | Up   | 7.33E-14  | 2.37E-13  | AAEL005636-PA OS=Aedes<br>aegypti GN=AAEL005636 PE=4<br>SV=1                                      |
| CCG010653.1 | 1185 | 42  | 218 | 1.52297794 | 6.4311429   | 2.078180106  | Up   | 7.66E-14  | 2.47E-13  | AAEL000241-PA OS=Aedes<br>aegypti GN=AAEL000241 PE=4<br>SV=1                                      |
| CCG006703.1 | 1370 | 47  | 218 | 1.47414418 | 5.562703895 | 1.915908677  | Up   | 0         | 0         | Putative uncharacterized protein<br>OS=Culex quinquefasciatus<br>GN=CpipJ_CPIJ000155 PE=4<br>SV=1 |
| CCG001676.1 | 686  | 50  | 218 | 3.13190486 | 11.10918999 | 1.826641339  | Up   | 0         | 0         | 5-hydroxyisourate hydrolase<br>OS=Culex quinquefasciatus<br>GN=CpipJ_CPIJ014057 PE=3<br>SV=1      |
| CCG019359.1 | 633  | 66  | 218 | 4.48025669 | 12.03934334 | 1.426103409  | Up   | 0         | 0         | AAEL005204-PA OS=Aedes<br>aegypti GN=AAEL005204 PE=4<br>SV=1                                      |
| CCG000555.1 | 385  | 83  | 218 | 9.26360512 | 19.79455672 | 1.095458097  | Up   | 7.67E-10  | 1.59E-09  | -                                                                                                 |
| CCG019159.1 | 2148 | 384 | 218 | 7.68174027 | 3.547907047 | -1.114464972 | Down | 1.11E-20  | 4.36E-20  | AAEL002774-PA OS=Aedes<br>aegypti GN=AAEL002774 PE=4<br>SV=1                                      |
| CCG014893.1 | 709  | 499 | 218 | 30.2424507 | 10.74880724 | -1.492398477 | Down | 9.94E-41  | 4.45E-40  | -                                                                                                 |
| CCG020988.1 | 1326 | 672 | 218 | 21.7765171 | 5.747288338 | -1.921819894 | Down | 3.70E-77  | 1.87E-76  | AAEL009167-PA OS=Aedes<br>aegypti GN=AAEL009167 PE=3<br>SV=1                                      |
| CCG010304.1 | 438  | 854 | 218 | 83.7811721 | 17.39932497 | -2.267594731 | Down | 1.20E-120 | 6.57E-120 | AAEL012513-PA OS=Aedes<br>aegypti GN=AAEL012513 PE=4<br>SV=1                                      |
| CCG015521.1 | 2190 | 10  | 219 | 0.19620883 | 3.495827677 | 4.155172169  | Up   | 5.43E-07  | 1.01E-06  | AAEL004017-PA OS=Aedes<br>aegypti GN=AAEL004017 PE=4<br>SV=1                                      |
| CCG014577.1 | 810  | 83  | 219 | 4.40307157 | 9.451682238 | 1.102060832  | Up   | 5.80E-10  | 1.21E-09  | AAEL012610-PA OS=Aedes<br>aegypti GN=AAEL012610 PE=2<br>SV=1                                      |
| CCG009393.1 | 1036 | 18  | 220 | 0.7465784  | 7.423572288 | 3.313747916  | Up   | 1.62E-09  | 3.33E-09  | AAEL008576-PA OS=Aedes<br>aegypti GN=AAEL008576 PE=4<br>SV=1                                      |

|             |      |      |     |            |             |              |      |           |           |                                                                                          |
|-------------|------|------|-----|------------|-------------|--------------|------|-----------|-----------|------------------------------------------------------------------------------------------|
| CCG022397.1 | 507  | 27   | 220 | 2.28832906 | 15.16927197 | 2.728785415  | Up   | 2.28E-12  | 5.41E-12  | AAEL007988-PA OS=Aedes aegypti GN=AAEL007988 PE=4 SV=1                                   |
| CCG005900.2 | 2919 | 33   | 220 | 0.48578323 | 2.63474508  | 2.439278798  | Up   | 1.31E-13  | 4.01E-13  | AAEL008183-PA OS=Aedes aegypti GN=AAEL008183 PE=4 SV=1                                   |
| CCG013163.1 | 963  | 70   | 220 | 3.12344904 | 7.986314527 | 1.3543899    | Up   | 2.07E-13  | 5.93E-13  | -                                                                                        |
| CCG008939.1 | 1152 | 72   | 220 | 2.68560841 | 6.6760598   | 1.313747916  | Up   | 9.54E-13  | 2.37E-12  | AGAP006521-PA OS=Anopheles gambiae GN=AGAP006521 PE=4 SV=4                               |
| CCG010433.1 | 468  | 76   | 220 | 6.97799109 | 16.43337797 | 1.235745404  | Up   | 1.05E-11  | 2.32E-11  | AAEL001105-PA OS=Aedes aegypti GN=AAEL001105 PE=4 SV=1                                   |
| CCG019985.2 | 1691 | 624  | 220 | 15.8563657 | 4.548090414 | -1.801729302 | Down | 8.15E-66  | 3.99E-65  | Putative uncharacterized protein OS=Culex quinquefasciatus GN=CpipJ_CPIJ014431 PE=4 SV=1 |
| CCG000287.1 | 258  | 1007 | 220 | 167.715204 | 29.80938329 | -2.492175051 | Down | 5.85E-159 | 3.36E-158 | Putative uncharacterized protein OS=Culex quinquefasciatus GN=CpipJ_CPIJ015032 PE=4 SV=1 |
| CCG021580.1 | 699  | 21   | 221 | 1.29093623 | 11.05261683 | 3.09789834   | Up   | 1.76E-10  | 3.73E-10  | AAEL006839-PA OS=Aedes aegypti GN=AAEL006839 PE=4 SV=1                                   |
| CCG012403.1 | 2491 | 51   | 221 | 0.87974968 | 3.101476984 | 1.817790421  | Up   | 0         | 0         | Putative uncharacterized protein OS=Culex quinquefasciatus GN=CpipJ_CPIJ009352 PE=4 SV=1 |
| CCG022330.1 | 442  | 55   | 221 | 5.34691268 | 17.47913839 | 1.70885605   | Up   | 0         | 0         | -                                                                                        |
| CCG026236.1 | 339  | 55   | 221 | 6.97149087 | 22.78990905 | 1.70885605   | Up   | 0         | 0         | AAEL005501-PA OS=Aedes aegypti GN=AAEL005501 PE=4 SV=1                                   |
| CCG014384.1 | 1166 | 79   | 221 | 2.9113285  | 6.625882647 | 1.186435015  | Up   | 4.08E-11  | 8.80E-11  | AAEL005258-PA OS=Aedes aegypti GN=AAEL005258 PE=4 SV=1                                   |
| CCG017241.1 | 723  | 80   | 221 | 4.75460411 | 10.68572499 | 1.168287668  | Up   | 6.97E-11  | 1.50E-10  | AAEL001202-PA OS=Aedes aegypti GN=AAEL001202 PE=4 SV=1                                   |
| CCG003878.1 | 1389 | 85   | 221 | 2.6295374  | 5.562116031 | 1.080824827  | Up   | 8.93E-10  | 1.84E-09  | AAEL013263-PA OS=Aedes aegypti GN=AAEL013263 PE=4 SV=1                                   |
| CCG022103.1 | 630  | 401  | 221 | 27.3505771 | 12.26314153 | -1.157242663 | Down | 8.85E-23  | 3.53E-22  | AAEL007763-PA OS=Aedes aegypti GN=AAEL007763 PE=4 SV=1                                   |
| CCG026314.1 | 873  | 714  | 221 | 35.1436317 | 8.849689767 | -1.989564501 | Down | 1.07E-85  | 5.51E-85  | AAEL010783-PA OS=Aedes aegypti GN=AAEL010783 PE=3 SV=1                                   |

|             |       |      |     |            |             |              |      |           |           |                                                                                         |
|-------------|-------|------|-----|------------|-------------|--------------|------|-----------|-----------|-----------------------------------------------------------------------------------------|
| CCG022264.1 | 11563 | 1068 | 221 | 3.96883824 | 0.668146603 | -2.570480168 | Down | 1.33E-174 | 7.72E-174 | AAEL014889-PA (Fragment)<br>OS=Aedes aegypti<br>GN=AAEL014889 PE=2 SV=1                 |
| CCG022545.1 | 1062  | 1155 | 221 | 46.732621  | 7.274744978 | -2.683461373 | Down | 4.72E-198 | 2.81E-197 | AGAP003014-PA OS=Anopheles<br>gambiae GN=AgaP_AGAP003014<br>PE=4 SV=4                   |
| CCG023431.1 | 1281  | 24   | 222 | 0.80505358 | 6.058343047 | 2.911766569  | Up   | 1.93E-11  | 4.23E-11  | AAEL008050-PA OS=Aedes<br>aegypti GN=AAEL008050 PE=4<br>SV=1                            |
| CCG024003.1 | 1357  | 29   | 222 | 0.91829204 | 5.71904012  | 2.638748075  | Up   | 6.66E-13  | 1.69E-12  | AAEL008798-PA OS=Aedes<br>aegypti GN=AAEL008798 PE=4<br>SV=1                            |
| CCG023377.2 | 2067  | 30   | 222 | 0.62365362 | 3.754589958 | 2.589838475  | Up   | 3.71E-13  | 9.94E-13  | Zinc finger protein OS=Culex<br>quinquefasciatus<br>GN=CpipJ_CPIJ018423 PE=4<br>SV=1    |
| CCG009033.1 | 943   | 36   | 222 | 1.64041405 | 8.229838222 | 2.326804069  | Up   | 6.13E-14  | 2.03E-13  | AAEL000659-PA OS=Aedes<br>aegypti GN=AAEL000659 PE=4<br>SV=1                            |
| CCG013619.1 | 1323  | 62   | 222 | 2.01369883 | 5.866014696 | 1.54253276   | Up   | 0         | 0         | AAEL015215-PA OS=Aedes<br>aegypti GN=AAEL015215 PE=4<br>SV=1                            |
| CCG013674.1 | 2043  | 71   | 222 | 1.49331922 | 3.798696742 | 1.346981951  | Up   | 1.20E-13  | 3.69E-13  | AAEL004623-PA OS=Aedes<br>aegypti GN=AAEL004623 PE=4<br>SV=1                            |
| CCG012674.1 | 1044  | 80   | 222 | 3.29269997 | 7.433656555 | 1.174800975  | Up   | 5.21E-11  | 1.12E-10  | AAEL001417-PA OS=Aedes<br>aegypti GN=AAEL001417 PE=4<br>SV=1                            |
| CCG022056.1 | 1163  | 88   | 222 | 3.25136427 | 6.673033055 | 1.037297452  | Up   | 2.85E-09  | 5.81E-09  | NAD-dependent protein<br>deacetylase OS=Aedes aegypti<br>GN=AAEL004004 PE=3 SV=1        |
| CCG000647.1 | 1446  | 0    | 223 | 0.001      | 5.391214191 | 12.39639451  | Up   | 4.44E-16  | 1.64E-15  | Angiopoietin like salivary protein<br>OS=Aedes albopictus PE=2 SV=1                     |
| CCG003430.2 | 3218  | 3    | 223 | 0.0400588  | 2.422528191 | 5.918250603  | Up   | 5.28E-05  | 8.84E-05  | Drosophila melanogaster<br>SD07741p OS=Plasmodium yoelii<br>yoelii GN=PY02675 PE=4 SV=1 |
| CCG022445.1 | 1632  | 10   | 223 | 0.26329494 | 4.776774338 | 4.181285009  | Up   | 5.43E-07  | 1.01E-06  | AAEL010492-PA OS=Aedes<br>aegypti GN=AAEL010492 PE=4<br>SV=1                            |
| CCG023549.1 | 1266  | 12   | 223 | 0.40729606 | 6.157737536 | 3.918250603  | Up   | 1.30E-07  | 2.49E-07  | AAEL014934-PA OS=Aedes<br>aegypti GN=AAEL014934 PE=4<br>SV=1                            |
| CCG014558.1 | 2391  | 16   | 223 | 0.28754318 | 3.260433174 | 3.503213104  | Up   | 7.09E-09  | 1.42E-08  | AAEL001591-PA OS=Aedes<br>aegypti GN=AAEL001591 PE=4<br>SV=1                            |

|             |      |     |     |            |             |              |      |          |          |                                                                                          |
|-------------|------|-----|-----|------------|-------------|--------------|------|----------|----------|------------------------------------------------------------------------------------------|
| CCG007502.1 | 573  | 23  | 223 | 1.72478865 | 13.60505361 | 2.979651148  | Up   | 4.01E-11 | 8.67E-11 | AAEL004909-PA OS=Aedes aegypti GN=AAEL004909 PE=4 SV=1                                   |
| CCG022688.3 | 1572 | 23  | 223 | 0.62869205 | 4.95909397  | 2.979651148  | Up   | 4.01E-11 | 8.67E-11 | AAEL013154-PA OS=Aedes aegypti GN=AAEL013154 PE=4 SV=1                                   |
| CCG004509.1 | 1661 | 66  | 223 | 1.70740667 | 4.693374907 | 1.458818984  | Up   | 0        | 0        | AAEL013993-PA OS=Aedes aegypti GN=AAEL013993 PE=4 SV=1                                   |
| CCG021811.1 | 1691 | 72  | 223 | 1.82958066 | 4.610109829 | 1.333288102  | Up   | 3.34E-13 | 9.11E-13 | AAEL004456-PA OS=Aedes aegypti GN=AAEL004456 PE=4 SV=1                                   |
| CCG001677.1 | 567  | 0   | 224 | 0.001      | 13.81067724 | 13.75349645  | Up   | 4.44E-16 | 1.66E-15 | 5-hydroxyisourate hydrolase OS=Culex quinquefasciatus GN=CpipJ_CPIJ014057 PE=3 SV=1      |
| CCG013598.1 | 1878 | 6   | 224 | 0.1372835  | 4.169677315 | 4.924705625  | Up   | 8.38E-06 | 1.48E-05 | AAEL004021-PA OS=Aedes aegypti GN=AAEL004021 PE=3 SV=1                                   |
| CCG025997.1 | 1200 | 11  | 224 | 0.39388923 | 6.525544997 | 4.050236507  | Up   | 2.67E-07 | 5.03E-07 | AAEL013821-PA OS=Aedes aegypti GN=AAEL013821 PE=4 SV=1                                   |
| CCG004958.2 | 954  | 16  | 224 | 0.72066641 | 8.208232701 | 3.509668126  | Up   | 7.09E-09 | 1.42E-08 | Putative uncharacterized protein OS=Culex quinquefasciatus GN=CpipJ_CPIJ001384 PE=4 SV=1 |
| CCG023427.1 | 1407 | 23  | 224 | 0.70241926 | 5.5654968   | 2.98610617   | Up   | 4.01E-11 | 8.66E-11 | AAEL000980-PA OS=Aedes aegypti GN=AAEL000980 PE=4 SV=1                                   |
| CCG009730.1 | 582  | 54  | 224 | 3.98688259 | 13.45473195 | 1.754780624  | Up   | 0        | 0        | AAEL000050-PA OS=Aedes aegypti GN=AAEL000050 PE=4 SV=1                                   |
| CCG004768.1 | 1392 | 63  | 224 | 1.94475092 | 5.625469825 | 1.532388202  | Up   | 0        | 0        | AGAP001675-PA OS=Anopheles gambiae GN=AgaP_AGAP001675 PE=4 SV=2                          |
| CCG015747.1 | 2161 | 81  | 224 | 1.61061939 | 3.623625172 | 1.169818123  | Up   | 4.96E-11 | 1.07E-10 | AAEL005676-PA OS=Aedes aegypti GN=AAEL005676 PE=4 SV=1                                   |
| CCG004319.1 | 630  | 366 | 224 | 24.9633696 | 12.42960952 | -1.006031712 | Down | 5.82E-17 | 2.20E-16 | AAEL006702-PA OS=Aedes aegypti GN=AAEL006702 PE=4 SV=1                                   |
| CCG001423.1 | 1225 | 390 | 224 | 13.6801604 | 6.39237061  | -1.097662188 | Down | 1.66E-20 | 6.52E-20 | Pyrroline-5-carboxylate reductase OS=Aedes aegypti GN=P5CR-1 PE=2 SV=1                   |
| CCG012954.1 | 888  | 624 | 224 | 30.1949486 | 8.818304051 | -1.775734093 | Down | 1.60E-64 | 7.80E-64 | AAEL006568-PA OS=Aedes aegypti GN=AAEL006568 PE=3 SV=1                                   |

|             |      |      |     |            |             |              |      |           |           |                                                                                       |
|-------------|------|------|-----|------------|-------------|--------------|------|-----------|-----------|---------------------------------------------------------------------------------------|
| CCG016175.1 | 1476 | 658  | 224 | 19.1558844 | 5.305321136 | -1.852275648 | Down | 5.95E-72  | 2.96E-71  | AAEL002672-PA OS=Aedes aegypti GN=AAEL002672 PE=4 SV=1                                |
| CCG025969.1 | 6015 | 677  | 224 | 4.83632757 | 1.301854364 | -1.893343898 | Down | 3.46E-76  | 1.74E-75  | Ubiquitin specific proteinase OS=Culex quinquefasciatus GN=CpipJ_CPIJ005165 PE=4 SV=1 |
| CCG010652.1 | 1941 | 783  | 224 | 17.3340042 | 4.034340029 | -2.103200371 | Down | 8.49E-101 | 4.50E-100 | AAEL000223-PA OS=Aedes aegypti GN=AAEL000223 PE=4 SV=1                                |
| CCG000080.1 | 2019 | 1949 | 224 | 41.4799469 | 3.878481425 | -3.418850249 | Down | 0         | 0         | AAEL001813-PA OS=Aedes aegypti GN=AAEL001813 PE=3 SV=1                                |
| CCG022141.1 | 546  | 2013 | 224 | 158.421384 | 14.34185714 | -3.465463331 | Down | 0         | 0         | AAEL009872-PA OS=Aedes aegypti GN=AAEL009872 PE=4 SV=1                                |
| CCG009015.1 | 1050 | 17   | 225 | 0.69570047 | 7.491059308 | 3.428631554  | Up   | 3.39E-09  | 6.89E-09  | AAEL014658-PA OS=Aedes aegypti GN=AAEL014658 PE=3 SV=1                                |
| CCG019540.1 | 765  | 24   | 225 | 1.34807011 | 10.28184611 | 2.931131894  | Up   | 1.93E-11  | 4.23E-11  | AAEL008716-PA OS=Aedes aegypti GN=AAEL008716 PE=4 SV=1                                |
| CCG000210.1 | 625  | 48   | 225 | 3.30007562 | 12.58497964 | 1.931131894  | Up   | 5.35E-14  | 1.79E-13  | AAEL013608-PA OS=Aedes aegypti GN=AAEL013608 PE=4 SV=1                                |
| CCG021981.1 | 1359 | 61   | 225 | 1.92873717 | 5.787794168 | 1.585357057  | Up   | 1.75E-14  | 6.17E-14  | AAEL002493-PA OS=Aedes aegypti GN=AAEL002493 PE=3 SV=1                                |
| CCG003428.1 | 839  | 80   | 225 | 4.09723334 | 9.374984832 | 1.1941663    | Up   | 2.15E-11  | 4.70E-11  | Uncharacterized protein OS=Anopheles darlingi GN=AND_04538 PE=4 SV=1                  |
| CCG015766.1 | 2601 | 475  | 225 | 7.84722181 | 3.024072385 | -1.375689308 | Down | 1.58E-34  | 6.84E-34  | AAEL001707-PA OS=Aedes aegypti GN=AAEL001707 PE=4 SV=1                                |
| CCG013062.1 | 771  | 1805 | 225 | 100.597109 | 10.20183174 | -3.301688727 | Down | 0         | 0         | AAEL008159-PA OS=Aedes aegypti GN=AAEL008159 PE=4 SV=1                                |
| CCG017087.1 | 3615 | 3682 | 225 | 43.7661308 | 2.175826355 | -4.330179516 | Down | 0         | 0         | AAEL001766-PA OS=Aedes aegypti GN=AAEL001766 PE=4 SV=1                                |
| CCG022517.1 | 757  | 8    | 226 | 0.45410552 | 10.43668501 | 4.522492166  | Up   | 2.19E-06  | 3.97E-06  | AAEL000049-PA OS=Aedes aegypti GN=AAEL000049 PE=4 SV=1                                |
| CCG021982.1 | 996  | 29   | 226 | 1.25112681 | 7.93229975  | 2.664511171  | Up   | 6.66E-13  | 1.69E-12  | AAEL002493-PA OS=Aedes aegypti GN=AAEL002493 PE=3 SV=1                                |
| CCG024928.1 | 480  | 35   | 226 | 3.13320982 | 16.45952198 | 2.393209149  | Up   | 6.39E-14  | 2.11E-13  | Uncharacterized protein OS=Anopheles darlingi GN=AND_16009 PE=4 SV=1                  |

|             |      |      |     |            |             |              |      |           |            |                                                                                          |
|-------------|------|------|-----|------------|-------------|--------------|------|-----------|------------|------------------------------------------------------------------------------------------|
| CCG017637.1 | 2721 | 41   | 226 | 0.64746752 | 2.903554043 | 2.164940162  | Up   | 1.02E-13  | 3.20E-13   | AAEL011649-PA OS=Aedes aegypti GN=AAEL011649 PE=4 SV=1                                   |
| CCG002583.1 | 657  | 66   | 226 | 4.31659434 | 12.02522154 | 1.478098047  | Up   | 0         | 0          | AAEL005414-PA OS=Aedes aegypti GN=AAEL005414 PE=4 SV=1                                   |
| CCG023440.3 | 1665 | 69   | 226 | 1.78072774 | 4.745087418 | 1.413967709  | Up   | 0         | 0          | AAEL006419-PA OS=Aedes aegypti GN=AAEL006419 PE=4 SV=1                                   |
| CCG009766.1 | 2589 | 70   | 226 | 1.16179275 | 3.051591561 | 1.393209149  | Up   | 0         | 0          | AAEL003070-PA OS=Aedes aegypti GN=AAEL003070 PE=4 SV=1                                   |
| CCG015658.1 | 1857 | 1    | 227 | 0.02313933 | 4.273305777 | 7.528861691  | Up   | 0.000587  | 0.00091615 | AAEL013916-PA OS=Aedes aegypti GN=AAEL013916 PE=4 SV=1                                   |
| CCG012891.1 | 1481 | 57   | 227 | 1.65379802 | 5.358223381 | 1.695971677  | Up   | 0         | 0          | AAEL009511-PA OS=Aedes aegypti GN=AAEL009511 PE=4 SV=1                                   |
| CCG019590.1 | 1005 | 498  | 227 | 21.2924655 | 7.896048584 | -1.431140241 | Down | 2.91E-38  | 1.29E-37   | AAEL012025-PA OS=Aedes aegypti GN=AAEL012025 PE=4 SV=1                                   |
| CCG006134.1 | 1008 | 0    | 228 | 0.001      | 7.90722927  | 12.94895654  | Up   | 4.44E-16  | 1.65E-15   | Mediator complex subunit 4 OS=Culex quinquefasciatus GN=CpipJ_CPIJ013633 PE=4 SV=1       |
| CCG025309.1 | 1152 | 43   | 228 | 1.60390502 | 6.918825611 | 2.108938463  | Up   | 8.46E-14  | 2.70E-13   | AAEL006666-PA OS=Aedes aegypti GN=AAEL006666 PE=4 SV=1                                   |
| CCG014093.1 | 774  | 51   | 228 | 2.8313391  | 10.29778696 | 1.862777876  | Up   | 0         | 0          | Putative uncharacterized protein OS=Culex quinquefasciatus GN=CpipJ_CPIJ001626 PE=4 SV=1 |
| CCG014548.1 | 2346 | 72   | 228 | 1.31876423 | 3.397479584 | 1.365278217  | Up   | 2.35E-14  | 8.21E-14   | AAEL006209-PA OS=Aedes aegypti GN=AAEL006209 PE=4 SV=1                                   |
| CCG006484.1 | 999  | 81   | 228 | 3.48403254 | 7.97846557  | 1.195353215  | Up   | 1.53E-11  | 3.39E-11   | AAEL008794-PA OS=Aedes aegypti GN=AAEL008794 PE=4 SV=1                                   |
| CCG006571.1 | 1137 | 85   | 228 | 3.21233724 | 7.010102994 | 1.125812282  | Up   | 1.26E-10  | 2.69E-10   | AAEL005732-PA OS=Aedes aegypti GN=AAEL005732 PE=3 SV=1                                   |
| CCG024383.1 | 531  | 376  | 228 | 30.4267801 | 15.01033353 | -1.019385634 | Down | 9.84E-18  | 3.75E-17   | AAEL004496-PA OS=Aedes aegypti GN=AAEL004496 PE=4 SV=1                                   |
| CCG009419.1 | 1851 | 702  | 228 | 16.2964634 | 4.306043816 | -1.920124002 | Down | 1.99E-80  | 1.01E-79   | AAEL006434-PA OS=Aedes aegypti GN=AAEL006434 PE=3 SV=1                                   |
| CCG017389.1 | 2838 | 1170 | 228 | 17.7147955 | 2.808487352 | -2.657089596 | Down | 2.11E-198 | 1.26E-197  | UDP-glucuronosyl transferase OS=Aedes aegypti PE=2 SV=1                                  |



|             |      |      |     |            |             |              |      |          |          |                                                                                                                       |
|-------------|------|------|-----|------------|-------------|--------------|------|----------|----------|-----------------------------------------------------------------------------------------------------------------------|
| CCG007023.1 | 2072 | 1742 | 228 | 36.1260993 | 3.846760185 | -3.231325691 | Down | 0        | 0        | AAEL007495-PA OS=Aedes aegypti GN=AAEL007495 PE=3 SV=1                                                                |
| CCG008915.1 | 1455 | 10   | 229 | 0.29532464 | 5.502024317 | 4.219588897  | Up   | 5.43E-07 | 1.01E-06 | AAEL005325-PA OS=Aedes aegypti GN=AAEL005325 PE=4 SV=1                                                                |
| CCG004863.1 | 1947 | 27   | 229 | 0.5958823  | 4.111682271 | 2.78662949   | Up   | 2.28E-12 | 5.41E-12 | AAEL001984-PA OS=Aedes aegypti GN=AAEL001984 PE=4 SV=1                                                                |
| CCG019686.1 | 943  | 40   | 229 | 1.82268227 | 8.489337626 | 2.219588897  | Up   | 6.86E-14 | 2.24E-13 | AAEL005592-PA OS=Aedes aegypti GN=AAEL005592 PE=4 SV=1                                                                |
| CCG008715.1 | 1287 | 41   | 229 | 1.3688882  | 6.220237281 | 2.183964987  | Up   | 1.02E-13 | 3.20E-13 | AAEL008599-PA (Fragment) OS=Aedes aegypti GN=AAEL008599 PE=3 SV=1                                                     |
| CCG003476.1 | 2278 | 53   | 229 | 0.99973483 | 3.514242924 | 1.813596537  | Up   | 0        | 0        | AAEL012229-PA OS=Aedes aegypti GN=AAEL012229 PE=4 SV=1                                                                |
| CCG022577.1 | 1296 | 62   | 229 | 2.05565088 | 6.177041189 | 1.587320682  | Up   | 0        | 0        | AAEL005746-PA OS=Aedes aegypti GN=AAEL005746 PE=4 SV=1                                                                |
| CCG000878.1 | 1536 | 68   | 229 | 1.90230596 | 5.211878503 | 1.454054151  | Up   | 0        | 0        | SYB1-POZ domain-containing protein 3 OS=Culex quinquefasciatus GN=Cuq3.12-PA OS=Aedes aegypti GN=AAEL009412 PE=4 SV=1 |
| CCG001176.1 | 2604 | 92   | 229 | 1.51813194 | 3.074287781 | 1.017955036  | Up   | 2.83E-09 | 5.76E-09 | AAEL009412-PA OS=Aedes aegypti GN=AAEL009412 PE=4 SV=1                                                                |
| CCG016487.1 | 3400 | 440  | 229 | 5.56078918 | 2.354542759 | -1.239842722 | Down | 1.53E-27 | 6.33E-27 | AAEL008242-PA OS=Aedes aegypti GN=AAEL008242 PE=4 SV=1                                                                |
| CCG005473.1 | 3422 | 527  | 229 | 6.61748981 | 2.33940543  | -1.50014216  | Down | 3.07E-43 | 1.39E-42 | AAEL004509-PA OS=Aedes aegypti GN=AAEL004509 PE=4 SV=1                                                                |
| CCG025116.1 | 876  | 36   | 230 | 1.7658795  | 9.178542988 | 2.377878253  | Up   | 6.13E-14 | 2.03E-13 | AAEL003484-PA OS=Aedes aegypti GN=AAEL003484 PE=4 SV=1                                                                |
| CCG024610.1 | 393  | 43   | 230 | 4.70152313 | 20.45904239 | 2.1215385    | Up   | 8.46E-14 | 2.70E-13 | AAEL013061-PA OS=Aedes aegypti GN=AAEL013061 PE=4 SV=1                                                                |
| CCG011650.1 | 1203 | 45   | 230 | 1.60734668 | 6.683627313 | 2.055950158  | Up   | 0        | 0        | AAEL004843-PA OS=Aedes aegypti GN=AAEL004843 PE=3 SV=1                                                                |
| CCG011865.1 | 1008 | 65   | 230 | 2.77086582 | 7.97659093  | 1.525435442  | Up   | 0        | 0        | AAEL011367-PA OS=Aedes aegypti GN=AAEL011367 PE=4 SV=1                                                                |
| CCG010516.1 | 1434 | 73   | 230 | 2.18744116 | 5.606976051 | 1.357978696  | Up   | 0        | 0        | AAEL009786-PA OS=Aedes aegypti GN=AAEL009786 PE=4 SV=1                                                                |

|             |      |      |     |            |             |              |      |           |           |                                                                              |
|-------------|------|------|-----|------------|-------------|--------------|------|-----------|-----------|------------------------------------------------------------------------------|
| CCG016958.1 | 1251 | 75   | 230 | 2.57612318 | 6.427181181 | 1.318984564  | Up   | 1.19E-13  | 3.68E-13  | AAEL004497-PA OS=Aedes aegypti GN=AAEL004497 PE=4 SV=1                       |
| CCG021350.1 | 706  | 3800 | 230 | 231.281858 | 11.38867374 | -4.343980448 | Down | 0         | 0         | AAEL002889-PA OS=Aedes aegypti GN=AAEL002889 PE=4 SV=1                       |
| CCG005677.1 | 408  | 0    | 231 | 0.001      | 19.79255376 | 14.27267015  | Up   | 4.44E-16  | 1.63E-15  | AAEL013744-PA OS=Aedes aegypti GN=AAEL013744 PE=2 SV=1                       |
| CCG012213.2 | 8548 | 15   | 231 | 0.07540314 | 0.94470776  | 3.64717165   | Up   | 1.48E-08  | 2.93E-08  | Polyprotein OS=Culex sinensis GN=CLF_101279 PE=4 SV=1                        |
| CCG025980.1 | 4288 | 30   | 231 | 0.30062781 | 1.88324672  | 2.64717165   | Up   | 3.71E-13  | 9.94E-13  | AAEL001966-PA OS=Aedes aegypti GN=AAEL001966 PE=4 SV=1                       |
| CCG027208.2 | 1080 | 39   | 231 | 1.55168486 | 7.477186976 | 2.268660026  | Up   | 7.33E-14  | 2.38E-13  | AAEL009134-PA (Fragment) OS=Aedes aegypti GN=AAEL009134 PE=4 SV=1            |
| CCG027067.1 | 366  | 49   | 231 | 5.75277868 | 22.06383042 | 1.939352401  | Up   | 0         | 0         | Single-stranded DNA-binding protein OS=Aedes aegypti GN=AAEL000147 PE=3 SV=1 |
| CCG028124.1 | 606  | 84   | 231 | 5.95620084 | 13.32567976 | 1.161744822  | Up   | 3.17E-11  | 6.89E-11  | AAEL010423-PA OS=Aedes aegypti GN=AAEL010423 PE=4 SV=1                       |
| CCG005101.1 | 1860 | 444  | 231 | 10.2572915 | 4.341592438 | -1.240353621 | Down | 8.55E-28  | 3.55E-27  | AAEL006905-PA OS=Aedes aegypti GN=AAEL006905 PE=4 SV=1                       |
| CCG006412.1 | 2932 | 559  | 231 | 8.19238801 | 2.754216212 | -1.572642228 | Down | 5.87E-49  | 2.72E-48  | AAEL010676-PA (Fragment) OS=Aedes aegypti GN=AAEL010676 PE=4 SV=1            |
| CCG027941.1 | 1713 | 626  | 231 | 15.7028919 | 4.714163418 | -1.735956602 | Down | 9.69E-63  | 4.71E-62  | AAEL002880-PA OS=Aedes aegypti GN=AAEL002880 PE=3 SV=1                       |
| CCG025347.1 | 354  | 907  | 231 | 110.094772 | 22.81175688 | -2.270896495 | Down | 3.01E-128 | 1.67E-127 | AAEL002526-PA OS=Aedes aegypti GN=AAEL002526 PE=4 SV=1                       |
| CCG022765.1 | 1855 | 17   | 232 | 0.39379272 | 4.372140276 | 3.472831358  | Up   | 3.39E-09  | 6.89E-09  | AAEL010136-PA OS=Aedes aegypti GN=AAEL010136 PE=4 SV=1                       |
| CCG023408.1 | 828  | 20   | 232 | 1.03791629 | 9.795072719 | 3.238366104  | Up   | 3.69E-10  | 7.71E-10  | AAEL010949-PA OS=Aedes aegypti GN=AAEL010949 PE=4 SV=1                       |
| CCG011479.1 | 2420 | 27   | 232 | 0.47941439 | 3.351371988 | 2.805406697  | Up   | 2.28E-12  | 5.41E-12  | AAEL000918-PA (Fragment) OS=Aedes aegypti GN=AAEL000918 PE=4 SV=2            |
| CCG008611.1 | 575  | 43   | 232 | 3.21338885 | 14.10490472 | 2.134029444  | Up   | 8.46E-14  | 2.71E-13  | -                                                                            |

|             |      |      |     |            |             |              |      |          |          |                                                                                      |
|-------------|------|------|-----|------------|-------------|--------------|------|----------|----------|--------------------------------------------------------------------------------------|
| CCG006115.1 | 1376 | 69   | 232 | 2.15473233 | 5.89412806  | 1.451769742  | Up   | 0        | 0        | AAEL002285-PA (Fragment)<br>OS=Aedes aegypti<br>GN=AAEL002285 PE=4 SV=1              |
| CCG027355.1 | 5001 | 418  | 232 | 3.5915515  | 1.621739694 | -1.147064933 | Down | 2.30E-23 | 9.21E-23 | AAEL009135-PA (Fragment)<br>OS=Aedes aegypti<br>GN=AAEL009135 PE=4 SV=1              |
| CCG012374.1 | 1008 | 574  | 232 | 24.4688767 | 8.04595259  | -1.604612728 | Down | 1.12E-51 | 5.24E-51 | AAEL000629-PA OS=Aedes<br>aegypti GN=AAEL000629 PE=3<br>SV=1                         |
| CCG020204.1 | 503  | 2283 | 232 | 195.02963  | 16.12389704 | -3.596420945 | Down | 0        | 0        | -                                                                                    |
| CCG026165.1 | 375  | 0    | 233 | 0.001      | 21.72074263 | 14.40678581  | Up   | 4.44E-16 | 1.64E-15 | AAEL013544-PA OS=Aedes<br>aegypti GN=AAEL013544 PE=4<br>SV=1                         |
| CCG003214.1 | 594  | 0    | 233 | 0.001      | 13.71259005 | 13.74321347  | Up   | 4.44E-16 | 1.63E-15 | AAEL000692-PA OS=Aedes<br>aegypti GN=AAEL006892 PE=4<br>SV=1                         |
| CCG026680.1 | 309  | 7    | 233 | 0.97342441 | 26.36012456 | 4.759144426  | Up   | 4.31E-06 | 7.71E-06 | AAEL003968-PA OS=Aedes<br>aegypti GN=AAEL003968 PE=4<br>SV=1                         |
| CCG021948.1 | 1554 | 13   | 233 | 0.35946367 | 5.241491948 | 3.86605963   | Up   | 6.34E-08 | 1.23E-07 | AAEL002785-PA OS=Aedes<br>aegypti GN=AAEL002785 PE=4<br>SV=1                         |
| CCG013854.1 | 1468 | 15   | 233 | 0.43906405 | 5.548554828 | 3.659608753  | Up   | 1.48E-08 | 2.92E-08 | Zinc finger protein OS=Culex<br>quinquefasciatus<br>GN=CpipJ_CPIJ001406 PE=4<br>SV=1 |
| CCG014823.1 | 438  | 44   | 233 | 4.31659434 | 18.59652623 | 2.10706773   | Up   | 3.91E-14 | 1.34E-13 | AAEL010249-PA OS=Aedes<br>aegypti GN=AAEL010249 PE=4<br>SV=1                         |
| CCG006833.1 | 456  | 60   | 233 | 5.65391245 | 17.86245282 | 1.659608753  | Up   | 0        | 0        | AAEL015541-PA (Fragment)<br>OS=Aedes aegypti<br>GN=AAEL015541 PE=4 SV=1              |
| CCG007693.1 | 867  | 66   | 233 | 3.27105246 | 9.394784877 | 1.522105229  | Up   | 0        | 0        | AAEL012523-PA OS=Aedes<br>aegypti GN=AAEL012523 PE=4<br>SV=1                         |
| CCG016298.1 | 1333 | 73   | 233 | 2.35318127 | 6.110486488 | 1.37667479   | Up   | 0        | 0        | AAEL005958-PA OS=Aedes<br>aegypti GN=AAEL005958 PE=4<br>SV=1                         |
| CCG008797.1 | 2846 | 84   | 233 | 1.2682564  | 2.862009307 | 1.174181926  | Up   | 1.77E-11 | 3.90E-11 | -                                                                                    |
| CCG008454.1 | 1341 | 93   | 233 | 2.98000397 | 6.074033175 | 1.027340537  | Up   | 1.56E-09 | 3.20E-09 | AAEL015014-PA OS=Aedes<br>aegypti GN=AAEL015014 PE=4<br>SV=1                         |
| CCG001528.1 | 747  | 1667 | 233 | 95.8909606 | 10.90398727 | -3.136539041 | Down | 0        | 0        | AAEL000629-PA OS=Aedes<br>aegypti GN=AAEL006297 PE=4<br>SV=1                         |

|             |       |      |     |            |             |              |      |           |           |                                                                                                   |
|-------------|-------|------|-----|------------|-------------|--------------|------|-----------|-----------|---------------------------------------------------------------------------------------------------|
| CCG005060.1 | 1050  | 22   | 234 | 0.90031825 | 7.790701681 | 3.113246305  | Up   | 8.38E-11  | 1.80E-10  | Fibrinogen and fibronectin<br>OS=Culex quinquefasciatus<br>GN=CpipJ_CPIJ009584 PE=4<br>SV=1       |
| CCG007884.1 | 852   | 25   | 234 | 1.26084902 | 9.60121686  | 2.928821734  | Up   | 9.32E-12  | 2.08E-11  | Putative uncharacterized protein<br>OS=Culex quinquefasciatus<br>GN=CpipJ_CPIJ006742 PE=4<br>SV=1 |
| CCG021845.1 | 858   | 33   | 234 | 1.6526821  | 9.534075483 | 2.528283804  | Up   | 1.31E-13  | 4.01E-13  | AAEL012389-PA OS=Aedes<br>aegypti GN=AAEL012389 PE=4<br>SV=1                                      |
| CCG001508.2 | 2700  | 44   | 234 | 0.70024753 | 3.02971732  | 2.113246305  | Up   | 3.91E-14  | 1.35E-13  | AAEL003172-PA OS=Aedes<br>aegypti GN=AAEL003172 PE=4<br>SV=1                                      |
| CCG005642.2 | 1890  | 941  | 234 | 21.3939261 | 4.3281676   | -2.305372989 | Down | 1.83E-135 | 1.02E-134 | Uncharacterized protein<br>OS=Anopheles darlingi<br>GN=AND_22059 PE=4 SV=1                        |
| CCG006186.1 | 819   | 20   | 235 | 1.04932197 | 10.03076318 | 3.256902055  | Up   | 3.69E-10  | 7.72E-10  | Putative uncharacterized protein<br>OS=Culex quinquefasciatus<br>GN=CpipJ_CPIJ012958 PE=4<br>SV=1 |
| CCG025756.1 | 560   | 26   | 235 | 1.99502339 | 14.66999115 | 2.878390432  | Up   | 4.60E-12  | 1.05E-11  | -                                                                                                 |
| CCG014001.1 | 249   | 41   | 235 | 7.07533783 | 32.99275117 | 2.221278146  | Up   | 1.02E-13  | 3.20E-13  | AAEL003749-PA OS=Aedes<br>aegypti GN=AAEL003749 PE=4<br>SV=1                                      |
| CCG017039.1 | 1425  | 91   | 235 | 2.74403218 | 5.765049152 | 1.07103551   | Up   | 3.53E-10  | 7.41E-10  | AAEL006300-PA OS=Aedes<br>aegypti GN=AAEL006300 PE=4<br>SV=1                                      |
| CCG023285.1 | 1374  | 468  | 235 | 14.6359795 | 5.979035692 | -1.291534569 | Down | 5.08E-31  | 2.16E-30  | AAEL006982-PA OS=Aedes<br>aegypti GN=AAEL006982 PE=3<br>SV=1                                      |
| CCG010990.1 | 2712  | 678  | 235 | 10.7424337 | 3.029201711 | -1.826311313 | Down | 1.11E-72  | 5.52E-72  | Neurexin-4 OS=Culex<br>quinquefasciatus<br>GN=CpipJ_CPIJ011417 PE=4<br>SV=1                       |
| CCG001499.1 | 4503  | 783  | 235 | 7.47175265 | 1.824382643 | -2.034038347 | Down | 1.51E-96  | 7.96E-96  | AAEL014592-PA OS=Aedes<br>aegypti GN=AAEL014592 PE=4<br>SV=1                                      |
| CCG001431.2 | 14786 | 875  | 235 | 2.54284579 | 0.55560632  | -2.194309056 | Down | 1.26E-118 | 6.87E-118 | AGAP005010-PA OS=Anopheles<br>gambiae GN=AGAP005010 PE=3<br>SV=4                                  |
| CCG020885.1 | 1995  | 5920 | 235 | 127.509187 | 4.117892251 | -4.95255131  | Down | 0         | 0         | AAEL012082-PA OS=Aedes<br>aegypti GN=AAEL012082 PE=4<br>SV=1                                      |

|             |      |      |     |            |             |              |      |          |           |                                                                                                |
|-------------|------|------|-----|------------|-------------|--------------|------|----------|-----------|------------------------------------------------------------------------------------------------|
| CCG006187.1 | 1935 | 14   | 236 | 0.31089214 | 4.263645126 | 3.777601331  | Up   | 3.07E-08 | 6.01E-08  | AAEL014096-PA (Fragment)<br>OS=Aedes aegypti<br>GN=AAEL014096 PE=4 SV=1                        |
| CCG020734.1 | 1373 | 23   | 236 | 0.71981347 | 6.008851652 | 3.061394297  | Up   | 4.01E-11 | 8.68E-11  | AAEL002159-PA OS=Aedes<br>aegypti GN=AAEL002159 PE=4<br>SV=1                                   |
| CCG018671.1 | 1647 | 30   | 236 | 0.78269098 | 5.009200558 | 2.678065658  | Up   | 3.71E-13 | 9.95E-13  | AAEL009725-PA OS=Aedes<br>aegypti GN=AAEL009725 PE=4<br>SV=1                                   |
| CCG016542.1 | 660  | 82   | 236 | 5.338664   | 12.5002323  | 1.227404249  | Up   | 2.40E-12 | 5.67E-12  | AAEL007525-PA OS=Aedes<br>aegypti GN=AAEL007525 PE=3<br>SV=1                                   |
| CCG003585.1 | 759  | 605  | 236 | 34.2512377 | 10.86976722 | -1.655835079 | Down | 7.77E-57 | 3.71E-56  | AAEL011004-PA OS=Aedes<br>aegypti GN=AAEL011004 PE=4<br>SV=1                                   |
| CCG011492.1 | 924  | 2249 | 236 | 104.58759  | 8.928737357 | -3.550111693 | Down | 0        | 0         | AAEL006065-PA OS=Aedes<br>aegypti GN=AAEL006065 PE=3<br>SV=1                                   |
| CCG002191.1 | 261  | 2    | 237 | 0.32927    | 31.74372259 | 6.591056453  | Up   | 9.36E-05 | 0.0001537 | AAEL012504-PA OS=Aedes<br>aegypti GN=AAEL012504 PE=4<br>SV=1                                   |
| CCG014347.1 | 1812 | 33   | 237 | 0.78256139 | 4.572357392 | 2.546662333  | Up   | 1.31E-13 | 4.01E-13  | AAEL014289-PA OS=Aedes<br>aegypti GN=AAEL014289 PE=4<br>SV=1                                   |
| CCG008882.1 | 984  | 52   | 237 | 2.27075833 | 8.419828857 | 1.890616735  | Up   | 0        | 0         | Methionine aminopeptidase<br>OS=Aedes aegypti<br>GN=AAEL003769 PE=3 SV=1                       |
| CCG017226.1 | 1414 | 57   | 237 | 1.73216045 | 5.859343419 | 1.758166439  | Up   | 0        | 0         | AAEL007864-PA OS=Aedes<br>aegypti GN=AAEL007864 PE=4<br>SV=1                                   |
| CCG025843.1 | 933  | 68   | 237 | 3.13177058 | 8.880076736 | 1.503593611  | Up   | 0        | 0         | AAEL008911-PA OS=Aedes<br>aegypti GN=AAEL008911 PE=4<br>SV=1                                   |
| CCG005105.1 | 441  | 72   | 237 | 7.01546688 | 18.78710112 | 1.421131451  | Up   | 0        | 0         | AAEL010292-PA (Fragment)<br>OS=Aedes aegypti<br>GN=AAEL010292 PE=4 SV=1                        |
| CCG002799.1 | 1077 | 73   | 237 | 2.91252612 | 7.692768426 | 1.401231894  | Up   | 0        | 0         | Sennelureonine protein kinase<br>OS=Culex quinquefasciatus<br>GN=CpipJ_CPIJ011728 PE=4<br>SV=1 |
| CCG004547.1 | 2295 | 78   | 237 | 1.46040928 | 3.610070412 | 1.305654234  | Up   | 6.28E-14 | 2.08E-13  | Uncharacterized protein<br>OS=Anopheles darlingi<br>GN=AND_09268 PE=4 SV=1                     |

|             |       |      |     |            |             |              |      |           |           |                                                                                                   |
|-------------|-------|------|-----|------------|-------------|--------------|------|-----------|-----------|---------------------------------------------------------------------------------------------------|
| CCG000399.1 | 897   | 473  | 237 | 22.6585111 | 9.236467776 | -1.294639921 | Down | 1.91E-31  | 8.11E-31  | Neurongin OS=Culex quinquefasciatus<br>GN=CpipJ_CPIJ010245 PE=4<br>SV=1                           |
| CCG012644.1 | 672   | 672  | 237 | 42.9697346 | 12.32903511 | -1.80126097  | Down | 1.03E-70  | 5.09E-70  | AAEL013326-PA OS=Aedes aegypti GN=AAEL013326 PE=4<br>SV=1                                         |
| CCG013054.1 | 1129  | 5    | 238 | 0.19029998 | 7.369415298 | 5.275202872  | Up   | 1.59E-05  | 2.76E-05  | Tetrancopeptide repeat protein, tpr OS=Culex quinquefasciatus<br>GN=CpipJ_CPIJ016841 PE=4<br>SV=1 |
| CCG000514.1 | 2381  | 12   | 238 | 0.21656313 | 3.494359459 | 4.012168466  | Up   | 1.30E-07  | 2.49E-07  | AAEL007904-PA OS=Aedes aegypti GN=AAEL007904 PE=4<br>SV=1                                         |
| CCG005590.1 | 2148  | 41   | 238 | 0.82018581 | 3.873403106 | 2.239578963  | Up   | 1.02E-13  | 3.20E-13  | AAEL010786-PA OS=Aedes aegypti GN=AAEL010786 PE=4<br>SV=1                                         |
| CCG015039.1 | 992   | 48   | 238 | 2.07918071 | 8.387167209 | 2.012168466  | Up   | 5.35E-14  | 1.79E-13  | Putative uncharacterized protein OS=Culex quinquefasciatus<br>GN=CpipJ_CPIJ009013 PE=4<br>SV=1    |
| CCG026214.1 | 2916  | 443  | 238 | 6.52798094 | 2.853247555 | -1.194031921 | Down | 3.35E-26  | 1.37E-25  | AAEL004819-PA OS=Aedes aegypti GN=AAEL004819 PE=4<br>SV=1                                         |
| CCG000611.1 | 921   | 487  | 238 | 22.7212386 | 9.033734931 | -1.330646995 | Down | 1.15E-33  | 4.92E-33  | AGAP007599-PA OS=Anopheles gambiae GN=AGAP007599 PE=4<br>SV=4                                     |
| CCG021411.1 | 19747 | 1110 | 238 | 2.41537476 | 0.421333361 | -2.519212994 | Down | 3.11E-177 | 1.82E-176 | AAEL013387-PA OS=Aedes aegypti GN=AAEL013387 PE=4<br>SV=1                                         |
| CCG021961.1 | 1824  | 1111 | 238 | 26.172903  | 4.561441816 | -2.520512134 | Down | 1.70E-177 | 9.91E-177 | AAEL014138-PA OS=Aedes aegypti GN=SRPN16 PE=3 SV=2                                                |
| CCG013043.1 | 1083  | 0    | 239 | 0.001      | 7.714707432 | 12.91339573  | Up   | 4.44E-16  | 1.63E-15  | AAEL011245-PA OS=Aedes aegypti GN=AAEL011245 PE=4<br>SV=1                                         |
| CCG027224.1 | 819   | 9    | 239 | 0.47219489 | 10.20149957 | 4.43325501   | Up   | 1.09E-06  | 2.01E-06  | -                                                                                                 |
| CCG014330.1 | 1590  | 43   | 239 | 1.16207458 | 5.254734685 | 2.176915257  | Up   | 8.46E-14  | 2.70E-13  | AAEL013892-PA OS=Aedes aegypti GN=AAEL013892 PE=4<br>SV=1                                         |
| CCG006385.2 | 2572  | 65   | 239 | 1.08593808 | 3.248455734 | 1.580812199  | Up   | 0         | 0         | AAEL008539-PA OS=Aedes aegypti GN=AAEL008539 PE=4<br>SV=1                                         |
| CCG011430.1 | 912   | 67   | 239 | 3.15676778 | 9.161215075 | 1.537090821  | Up   | 0         | 0         | Uncharacterized protein OS=Anopheles darlingi<br>GN=AND_19886 PE=4 SV=1                           |

|             |      |      |     |            |             |              |      |           |           |                                                                                          |
|-------------|------|------|-----|------------|-------------|--------------|------|-----------|-----------|------------------------------------------------------------------------------------------|
| CCG010236.1 | 644  | 75   | 239 | 5.00423928 | 12.97364619 | 1.374361321  | Up   | 0         | 0         | AAEL008067-PA OS=Aedes aegypti GN=AAEL008067 PE=4 SV=1                                   |
| CCG008418.1 | 2955 | 414  | 239 | 6.02012526 | 2.827420693 | -1.090306946 | Down | 1.88E-21  | 7.44E-21  | B-cell CLL/lymphoma 11A OS=Culex quinquefasciatus GN=CpipJ_CPIJ011139 PE=4 SV=1          |
| CCG005782.1 | 491  | 479  | 239 | 41.9195578 | 17.01635061 | -1.300701834 | Down | 4.80E-32  | 2.05E-31  | AAEL006951-PA OS=Aedes aegypti GN=AAEL006951 PE=4 SV=1                                   |
| CCG008748.1 | 1410 | 574  | 239 | 17.4926437 | 5.925551878 | -1.561726915 | Down | 9.93E-50  | 4.63E-49  | Tubulin beta-1 chain OS=Culex quinquefasciatus GN=CpipJ_CPIJ003635 PE=3 SV=1             |
| CCG011363.1 | 4227 | 676  | 239 | 6.87190457 | 1.976585793 | -1.797699424 | Down | 6.21E-71  | 3.08E-70  | AAEL005886-PA OS=Aedes aegypti GN=AAEL005886 PE=4 SV=1                                   |
| CCG023919.1 | 900  | 877  | 239 | 41.8716192 | 9.28336461  | -2.173253021 | Down | 1.84E-117 | 1.00E-116 | AAEL009750-PA OS=Aedes aegypti GN=AAEL009750 PE=4 SV=1                                   |
| CCG015716.1 | 9328 | 1956 | 239 | 9.01037745 | 0.895693412 | -3.330510643 | Down | 0         | 0         | -                                                                                        |
| CCG018297.1 | 474  | 37   | 240 | 3.3541776  | 17.7003933  | 2.399750434  | Up   | 5.17E-14  | 1.74E-13  | AAEL013696-PA OS=Aedes aegypti GN=AAEL013696 PE=4 SV=1                                   |
| CCG017264.1 | 993  | 51   | 240 | 2.2069048  | 8.449130338 | 1.936778457  | Up   | 0         | 0         | AAEL006856-PA OS=Aedes aegypti GN=AAEL006856 PE=4 SV=1                                   |
| CCG007940.1 | 1119 | 61   | 240 | 2.34240734 | 7.497753731 | 1.678466462  | Up   | 1.75E-14  | 6.17E-14  | Putative uncharacterized protein OS=Culex quinquefasciatus GN=CpipJ_CPIJ007533 PE=4 SV=1 |
| CCG001547.1 | 2492 | 63   | 240 | 1.08631352 | 3.366768228 | 1.631923876  | Up   | 0         | 0         | AAEL009415-PA OS=Aedes aegypti GN=AAEL009415 PE=4 SV=1                                   |
| CCG020955.1 | 1533 | 64   | 240 | 1.79390934 | 5.472920043 | 1.609203799  | Up   | 0         | 0         | AAEL008174-PA OS=Aedes aegypti GN=AAEL008174 PE=4 SV=1                                   |
| CCG016192.1 | 497  | 78   | 240 | 6.74374105 | 16.88126041 | 1.323801581  | Up   | 0         | 0         | AAEL010572-PA OS=Aedes aegypti GN=AAEL010572 PE=4 SV=1                                   |
| CCG012156.1 | 1017 | 84   | 240 | 3.54912262 | 8.249740831 | 1.216886377  | Up   | 2.21E-12  | 5.26E-12  | AAEL004827-PA OS=Aedes aegypti GN=AAEL004827 PE=1 SV=1                                   |
| CCG003049.1 | 2895 | 86   | 240 | 1.27647571 | 2.898095484 | 1.182939045  | Up   | 6.51E-12  | 1.46E-11  | AAEL011258-PA OS=Aedes aegypti GN=AAEL011258 PE=4 SV=1                                   |
| CCG003000.1 | 495  | 96   | 240 | 8.33352429 | 16.94946753 | 1.024241299  | Up   | 9.72E-10  | 2.01E-09  | -                                                                                        |
| CCG015530.1 | 1671 | 401  | 240 | 10.3117077 | 5.020937418 | -1.038254627 | Down | 2.43E-19  | 9.41E-19  | AAEL012287-PA OS=Aedes aegypti GN=AAEL012287 PE=3 SV=1                                   |

|             |      |      |     |            |             |              |      |           |           |                                                                                                                          |
|-------------|------|------|-----|------------|-------------|--------------|------|-----------|-----------|--------------------------------------------------------------------------------------------------------------------------|
| CCG007702.1 | 3129 | 426  | 240 | 5.85014604 | 2.681363511 | -1.125505821 | Down | 4.12E-23  | 1.65E-22  | Growth factor receptor-bound protein OS=Culex quinquefasciatus<br>AAEL010793-PA OS=Aedes aegypti GN=AAEL010793 PE=4 SV=1 |
| CCG027705.1 | 1545 | 1064 | 240 | 29.592102  | 5.430411926 | -2.446078636 | Down | 3.29E-164 | 1.90E-163 | AAEL003861-PA OS=Aedes aegypti GN=AAEL003861 PE=4 SV=1                                                                   |
| CCG020999.1 | 795  | 3    | 241 | 0.16214994 | 10.59741472 | 6.030240039  | Up   | 5.28E-05  | 8.84E-05  | AAEL003861-PA OS=Aedes aegypti GN=AAEL003861 PE=4 SV=1                                                                   |
| CCG021077.1 | 500  | 20   | 241 | 1.71878938 | 16.8498894  | 3.293274445  | Up   | 3.69E-10  | 7.72E-10  | -                                                                                                                        |
| CCG016152.1 | 879  | 26   | 241 | 1.27100466 | 9.584692494 | 2.914762822  | Up   | 4.60E-12  | 1.06E-11  | Predicted protein OS=Culex quinquefasciatus<br>GN=CpipJ_CPIJ015175 PE=4 SV=1                                             |
| CCG004572.1 | 1095 | 39   | 241 | 1.5304289  | 7.694013427 | 2.329800321  | Up   | 7.33E-14  | 2.38E-13  | AAEL013006-PA OS=Aedes aegypti GN=AAEL013006 PE=4 SV=1                                                                   |
| CCG006766.1 | 1646 | 51   | 241 | 1.33138303 | 5.11843542  | 1.942777198  | Up   | 0         | 0         | AAEL001359-PA OS=Aedes aegypti GN=AAEL001359 PE=4 SV=1                                                                   |
| CCG013578.1 | 2127 | 53   | 241 | 1.07070801 | 3.960951905 | 1.887282085  | Up   | 0         | 0         | AAEL007932-PA OS=Aedes aegypti GN=AAEL007932 PE=4 SV=1                                                                   |
| CCG018380.1 | 2770 | 73   | 241 | 1.13241539 | 3.041496282 | 1.425377981  | Up   | 0         | 0         | AAEL001530-PA OS=Aedes aegypti GN=AAEL001530 PE=4 SV=1                                                                   |
| CCG003122.1 | 1749 | 83   | 241 | 2.03915836 | 4.817006691 | 1.240163109  | Up   | 1.07E-12  | 2.64E-12  | Cholinesterase OS=Culex quinquefasciatus<br>GN=CpipJ_CPIJ019485 PE=4 SV=1                                                |
| CCG026061.1 | 495  | 92   | 241 | 7.98629411 | 17.02009031 | 1.091640584  | Up   | 1.10E-10  | 2.35E-10  | AAEL010516-PA OS=Aedes aegypti GN=AAEL010516 PE=4 SV=1                                                                   |
| CCG016840.1 | 1860 | 459  | 241 | 10.6038216 | 4.529540162 | -1.227147803 | Down | 3.18E-28  | 1.33E-27  | AAEL001368-PA OS=Aedes aegypti GN=AAEL001368 PE=4 SV=1                                                                   |
| CCG000963.1 | 2574 | 661  | 241 | 11.0345744 | 3.27309429  | -1.753303921 | Down | 4.62E-67  | 2.27E-66  | AAEL000515-PA OS=Aedes aegypti GN=AAEL000515 PE=4 SV=1                                                                   |
| CCG008462.1 | 1411 | 882  | 241 | 26.8598908 | 5.970903403 | -2.169432306 | Down | 7.36E-118 | 4.02E-117 | AAEL001920-PA OS=Aedes aegypti GN=AAEL001920 PE=4 SV=1                                                                   |
| CCG003083.1 | 1504 | 11   | 242 | 0.31427332 | 5.624935491 | 4.161744822  | Up   | 2.67E-07  | 5.04E-07  | AAEL013616-PA OS=Aedes aegypti GN=AAEL013616 PE=4 SV=1                                                                   |
| CCG027628.1 | 1395 | 35   | 242 | 1.0780937  | 6.06444658  | 2.491893424  | Up   | 6.39E-14  | 2.11E-13  | AAEL007758-PA OS=Aedes aegypti GN=AAEL007758 PE=4 SV=1                                                                   |



|             |      |      |     |            |             |              |      |          |          |                                                                                            |
|-------------|------|------|-----|------------|-------------|--------------|------|----------|----------|--------------------------------------------------------------------------------------------|
| CCG018222.1 | 894  | 49   | 242 | 2.35516442 | 9.462978724 | 2.006466597  | Up   | 0        | 0        | AGAP001238-PB OS=Anopheles gambiae GN=AgaP_AGAP001238 PE=4 SV=1                            |
| CCG016579.1 | 537  | 53   | 242 | 4.24096077 | 15.75400927 | 1.893255987  | Up   | 0        | 0        | AAEL010088-PA OS=Aedes aegypti GN=AAEL010088 PE=4 SV=1                                     |
| CCG009715.1 | 942  | 73   | 242 | 3.32992636 | 8.980788725 | 1.431351882  | Up   | 0        | 0        | AAEL002362-PA OS=Aedes aegypti GN=AAEL002362 PE=4 SV=1                                     |
| CCG025600.1 | 1092 | 475  | 242 | 18.6910476 | 7.7471639   | -1.270607262 | Down | 1.05E-30 | 4.44E-30 | Lipase OS=Aedes aegypti GN=AAEL015326 PE=3 SV=1                                            |
| CCG013038.1 | 4662 | 516  | 242 | 4.75598092 | 1.814651004 | -1.390050814 | Down | 6.18E-38 | 2.73E-37 | AAEL011241-PA OS=Aedes aegypti GN=AAEL011241 PE=4 SV=1                                     |
| CCG006218.1 | 2257 | 17   | 243 | 0.3236533  | 3.76378434  | 3.539662866  | Up   | 3.39E-09 | 6.90E-09 | Putative uncharacterized protein OS=Culex quinquefasciatus GN=CpipJ_CPIJ003716 PE=4 SV=1   |
| CCG023066.1 | 1065 | 17   | 243 | 0.68590187 | 7.976395545 | 3.539662866  | Up   | 3.39E-09 | 6.88E-09 | AAEL004349-PA OS=Aedes aegypti GN=AAEL004349 PE=4 SV=1                                     |
| CCG006991.1 | 1518 | 33   | 243 | 0.93412467 | 5.596087784 | 2.582731588  | Up   | 1.31E-13 | 4.01E-13 | AAEL007426-PA OS=Aedes aegypti GN=AAEL007426 PE=4 SV=1                                     |
| CCG018489.1 | 618  | 48   | 243 | 3.33745512 | 13.74573019 | 2.042163207  | Up   | 5.35E-14 | 1.79E-13 | -                                                                                          |
| CCG008755.1 | 1962 | 64   | 243 | 1.40166311 | 4.32969483  | 1.627125707  | Up   | 0        | 0        | Leucine-rich transmembrane protein OS=Culex quinquefasciatus GN=CpipJ_CPIJ003712 PE=2 SV=1 |
| CCG020594.1 | 1374 | 68   | 243 | 2.12659531 | 6.182577333 | 1.539662866  | Up   | 0        | 0        | AAEL010501-PA OS=Aedes aegypti GN=AAEL010501 PE=4 SV=1                                     |
| CCG006741.1 | 567  | 91   | 243 | 6.89637716 | 14.98211862 | 1.119331067  | Up   | 3.82E-11 | 8.27E-11 | AAEL003678-PA OS=Aedes aegypti GN=AAEL003678 PE=3 SV=1                                     |
| CCG027525.1 | 812  | 95   | 243 | 5.02724728 | 10.46165179 | 1.057270099  | Up   | 2.73E-10 | 5.74E-10 | AAEL012051-PA OS=Aedes aegypti GN=AAEL012051 PE=4 SV=1                                     |
| CCG000919.1 | 1005 | 459  | 243 | 19.6249833 | 8.452598264 | -1.215224636 | Down | 8.17E-28 | 3.39E-27 | AAEL007500-PA OS=Aedes aegypti GN=AAEL007500 PE=4 SV=1                                     |
| CCG024845.1 | 627  | 3942 | 243 | 270.154217 | 13.54842306 | -4.317586354 | Down | 0        | 0        | AAEL001323-PA OS=Aedes aegypti GN=AAEL001323 PE=4 SV=1                                     |
| CCG017358.1 | 801  | 4    | 244 | 0.21458045 | 10.64896321 | 5.633050541  | Up   | 2.95E-05 | 5.03E-05 | -                                                                                          |
| CCG008095.1 | 877  | 26   | 244 | 1.27390319 | 9.726134016 | 2.932610823  | Up   | 4.60E-12 | 1.05E-11 | -                                                                                          |

|             |      |      |     |            |             |              |      |           |            |                                                                                                   |
|-------------|------|------|-----|------------|-------------|--------------|------|-----------|------------|---------------------------------------------------------------------------------------------------|
| CCG027021.1 | 389  | 39   | 244 | 4.30801967 | 21.92755664 | 2.347648323  | Up   | 7.33E-14  | 2.37E-13   | AAEL008585-PA (Fragment)<br>OS=Aedes aegypti<br>GN=AAEL008585 PE=3 SV=1                           |
| CCG024129.1 | 1092 | 50   | 244 | 1.96747869 | 7.811190048 | 1.989194352  | Up   | 0         | 0          | AAEL004512-PA OS=Aedes<br>aegypti GN=AAEL004512 PE=4<br>SV=1                                      |
| CCG027732.1 | 645  | 79   | 244 | 5.26295974 | 13.22452641 | 1.329269793  | Up   | 0         | 0          | AAEL000944-PA OS=Aedes<br>aegypti GN=AAEL000944 PE=4<br>SV=1                                      |
| CCG024857.1 | 4049 | 546  | 244 | 5.79438753 | 2.10664844  | -1.4597066   | Down | 5.27E-43  | 2.38E-42   | AAEL002338-PA OS=Aedes<br>aegypti GN=AAEL002338 PE=4<br>SV=1                                      |
| CCG024710.1 | 1515 | 2    | 245 | 0.05672572 | 5.653318686 | 6.638951143  | Up   | 9.36E-05  | 0.00015365 | AAEL002671-PA OS=Aedes<br>aegypti GN=AAEL002671 PE=4<br>SV=1                                      |
| CCG023277.1 | 2358 | 17   | 245 | 0.30979028 | 3.632221293 | 3.551488302  | Up   | 3.39E-09  | 6.89E-09   | AAEL008509-PA OS=Aedes<br>aegypti GN=AAEL008509 PE=3<br>SV=1                                      |
| CCG025198.1 | 1605 | 26   | 245 | 0.69608293 | 5.336310162 | 2.938511425  | Up   | 4.60E-12  | 1.05E-11   | AAEL002349-PA OS=Aedes<br>aegypti GN=AAEL002349 PE=4<br>SV=1                                      |
| CCG009070.1 | 1113 | 45   | 245 | 1.73732081 | 7.695218157 | 2.147098046  | Up   | 0         | 0          | AAEL007627-PA OS=Aedes<br>aegypti GN=AAEL007627 PE=4<br>SV=1                                      |
| CCG009769.1 | 819  | 46   | 245 | 2.41344053 | 10.45760416 | 2.115389187  | Up   | 3.40E-14  | 1.18E-13   | AAEL006720-PA OS=Aedes<br>aegypti GN=AAEL006720 PE=4<br>SV=1                                      |
| CCG011414.1 | 399  | 52   | 245 | 5.60006566 | 21.46560854 | 1.938511425  | Up   | 0         | 0          | Putative uncharacterized protein<br>OS=Culex quinquefasciatus<br>GN=CpipJ_CPIJ014272 PE=4<br>SV=1 |
| CCG028577.1 | 977  | 83   | 245 | 3.65044828 | 8.766405127 | 1.263911711  | Up   | 4.09E-13  | 1.09E-12   | AAEL011383-PA OS=Aedes<br>aegypti GN=AAEL011383 PE=4<br>SV=1                                      |
| CCG001788.1 | 716  | 91   | 245 | 5.46123722 | 11.96198018 | 1.131156503  | Up   | 2.16E-11  | 4.73E-11   | AAEL002758-PA OS=Aedes<br>aegypti GN=AAEL002758 PE=4<br>SV=1                                      |
| CCG026364.1 | 679  | 99   | 245 | 6.26510122 | 12.61381121 | 1.009594523  | Up   | 1.03E-09  | 2.12E-09   | AAEL009538-PA OS=Aedes<br>aegypti GN=AAEL009538 PE=4<br>SV=1                                      |
| CCG007821.1 | 1311 | 658  | 245 | 21.5668081 | 6.533011296 | -1.722992631 | Down | 3.55E-65  | 1.73E-64   | AAEL001876-PA OS=Aedes<br>aegypti GN=AAEL001876 PE=3<br>SV=1                                      |
| CCG003613.1 | 1125 | 1376 | 245 | 52.5567598 | 7.61313583  | -2.787313612 | Down | 1.32E-245 | 8.12E-245  | AAEL010793-PA OS=Aedes<br>aegypti GN=AAEL010793 PE=4<br>SV=1                                      |
| CCG009387.1 | 708  | 12   | 246 | 0.72830059 | 12.1465199  | 4.059865208  | Up   | 1.30E-07  | 2.49E-07   | AAEL003456-PA OS=Aedes<br>aegypti GN=AAEL003456 PE=4<br>SV=1                                      |
| CCG012074.1 | 739  | 15   | 246 | 0.87218676 | 11.63699064 | 3.737937114  | Up   | 1.48E-08  | 2.92E-08   | -                                                                                                 |

|             |      |      |     |            |             |              |      |           |           |                                                                                    |
|-------------|------|------|-----|------------|-------------|--------------|------|-----------|-----------|------------------------------------------------------------------------------------|
| CCG000823.1 | 606  | 24   | 246 | 1.70177167 | 14.19098364 | 3.059865208  | Up   | 1.93E-11  | 4.24E-11  | DNA replication complex GINS protein PSF2 OS=Aedes aegypti GN=AAEL006660 PE=3 SV=1 |
| CCG025809.1 | 1948 | 75   | 246 | 1.6543789  | 4.414648915 | 1.416009019  | Up   | 0         | 0         | AAEL004609-PA OS=Aedes aegypti GN=AAEL004609 PE=4 SV=1                             |
| CCG018526.1 | 579  | 1652 | 246 | 122.601039 | 14.85273935 | -3.045170262 | Down | 0         | 0         | -                                                                                  |
| CCG006309.1 | 1122 | 3    | 247 | 0.11489234 | 7.695806027 | 6.065717935  | Up   | 5.28E-05  | 8.85E-05  | -                                                                                  |
| CCG013531.1 | 264  | 4    | 247 | 0.65105659 | 32.70717562 | 5.650680435  | Up   | 2.95E-05  | 5.03E-05  | AAEL010910-PA OS=Aedes aegypti GN=AAEL010910 PE=4 SV=1                             |
| CCG018168.1 | 582  | 33   | 247 | 2.43642825 | 14.83624461 | 2.606286316  | Up   | 1.31E-13  | 4.01E-13  | AAEL002427-PA OS=Aedes aegypti GN=AAEL002427 PE=4 SV=1                             |
| CCG016656.1 | 924  | 89   | 247 | 4.13885972 | 9.344907319 | 1.174947004  | Up   | 4.28E-12  | 9.85E-12  | AAEL012438-PA OS=Aedes aegypti GN=AAEL012438 PE=4 SV=1                             |
| CCG005234.1 | 1758 | 448  | 247 | 10.950194  | 4.911657772 | -1.156674487 | Down | 3.04E-25  | 1.24E-24  | AAEL003139-PA OS=Aedes aegypti GN=AAEL003139 PE=4 SV=1                             |
| CCG004441.1 | 1755 | 541  | 247 | 13.245941  | 4.920053768 | -1.428804348 | Down | 2.55E-41  | 1.14E-40  | AAEL010462-PA OS=Aedes aegypti GN=AAEL010462 PE=4 SV=1                             |
| CCG010077.1 | 1399 | 617  | 247 | 18.9509123 | 6.172047436 | -1.618446244 | Down | 4.27E-56  | 2.03E-55  | AAEL011334-PA OS=Aedes aegypti GN=AAEL011334 PE=4 SV=1                             |
| CCG027055.1 | 1548 | 1026 | 247 | 28.4799404 | 5.577967935 | -2.35213458  | Down | 3.57E-151 | 2.03E-150 | AAEL015058-PA OS=Aedes aegypti GN=AAEL015058 PE=4 SV=1                             |
| CCG017077.1 | 1596 | 16   | 248 | 0.43077428 | 5.432113183 | 3.656509514  | Up   | 7.09E-09  | 1.42E-08  | Importin subunit alpha OS=Aedes aegypti GN=AAEL012960 PE=3 SV=1                    |
| CCG007058.1 | 246  | 75   | 248 | 13.1005288 | 35.2424904  | 1.427690824  | Up   | 0         | 0         | AGAP006038-PA OS=Anopheles gambiae GN=AGAP006038 PE=4 SV=4                         |
| CCG013318.1 | 1288 | 86   | 248 | 2.86909719 | 6.73109677  | 1.23024476   | Up   | 4.58E-13  | 1.20E-12  | AAEL004970-PA OS=Aedes aegypti GN=AAEL004970 PE=4 SV=1                             |
| CCG006344.1 | 570  | 96   | 248 | 7.23700793 | 15.20991691 | 1.071547013  | Up   | 1.13E-10  | 2.41E-10  | AAEL000467-PA OS=Aedes aegypti GN=AAEL000467 PE=2 SV=1                             |
| CCG001082.1 | 3114 | 439  | 248 | 6.05771146 | 2.784088837 | -1.121567615 | Down | 1.21E-23  | 4.88E-23  | AAEL009547-PA OS=Aedes aegypti GN=AAEL009547 PE=3 SV=1                             |
| CCG012801.1 | 566  | 860  | 248 | 65.2897028 | 15.31740749 | -2.091683335 | Down | 9.44E-110 | 5.07E-109 | AAEL002797-PA OS=Aedes aegypti GN=AAEL002797 PE=4 SV=1                             |

|             |      |      |     |            |             |              |      |           |            |                                                                                        |
|-------------|------|------|-----|------------|-------------|--------------|------|-----------|------------|----------------------------------------------------------------------------------------|
| CCG023354.1 | 1295 | 1120 | 248 | 37.1630137 | 6.694712463 | -2.472773503 | Down | 5.67E-175 | 3.31E-174  | Carbonic anhydrase OS=Aedes aegypti PE=2 SV=1                                          |
| CCG005577.1 | 660  | 28   | 249 | 1.82295844 | 13.18880442 | 2.854960214  | Up   | 1.17E-12  | 2.86E-12   | AAEL007882-PA OS=Aedes aegypti GN=AAEL007882 PE=4 SV=1                                 |
| CCG026616.1 | 426  | 51   | 249 | 5.144264   | 20.43335896 | 1.989889794  | Up   | 0         | 0          | AAEL004774-PA OS=Aedes aegypti GN=AAEL004774 PE=4 SV=1                                 |
| CCG025764.1 | 2442 | 66   | 249 | 1.16134418 | 3.564541735 | 1.617921017  | Up   | 0         | 0          | AAEL010494-PA OS=Aedes aegypti GN=AAEL010494 PE=4 SV=1                                 |
| CCG015966.1 | 1161 | 73   | 249 | 2.70180071 | 7.497511556 | 1.472490577  | Up   | 0         | 0          | AAEL007613-PA OS=Aedes aegypti GN=TOLL1A PE=4 SV=1                                     |
| CCG014012.1 | 663  | 87   | 249 | 5.63856246 | 13.12912657 | 1.21937164   | Up   | 6.66E-13  | 1.69E-12   | AAEL004448-PA OS=Aedes aegypti GN=AAEL004448 PE=4 SV=1                                 |
| CCG000405.1 | 1955 | 90   | 249 | 1.97814635 | 4.452486402 | 1.17046204   | Up   | 3.94E-12  | 9.10E-12   | AAEL004551-PA OS=Aedes aegypti GN=AAEL004551 PE=4 SV=1                                 |
| CCG008773.1 | 1337 | 505  | 249 | 16.2301541 | 6.510554163 | -1.317824442 | Down | 2.36E-34  | 1.02E-33   | -                                                                                      |
| CCG018753.1 | 1773 | 531  | 249 | 12.8691083 | 4.909538024 | -1.390252915 | Down | 5.36E-39  | 2.38E-38   | AGAP002366-PA OS=Anopheles gambiae GN=AgaP_AGAP002366 PE=3 SV=3                        |
| CCG021125.1 | 3432 | 751  | 249 | 9.40275953 | 2.536308542 | -1.890353962 | Down | 3.88E-84  | 1.98E-83   | AAEL009195-PA OS=Aedes aegypti GN=AAEL009195 PE=4 SV=1                                 |
| CCG013200.1 | 1887 | 838  | 249 | 19.0824789 | 4.612936363 | -2.048491298 | Down | 3.76E-104 | 2.00E-103  | AAEL006143-PA OS=Aedes aegypti GN=AAEL006143 PE=4 SV=1                                 |
| CCG018777.1 | 1083 | 1    | 250 | 0.03967658 | 8.069777648 | 7.668097488  | Up   | 0.000587  | 0.00091672 | Arginine N-methyltransferase 1 OS=Culex quinquefasciatus GN=CpipJ_CPIJ003726 PE=4 SV=1 |
| CCG024576.1 | 474  | 7    | 250 | 0.63457414 | 18.43790969 | 4.860742566  | Up   | 4.31E-06  | 7.71E-06   | -                                                                                      |
| CCG005300.1 | 1257 | 20   | 250 | 0.68368711 | 6.952720122 | 3.346169394  | Up   | 3.69E-10  | 7.71E-10   | AAEL012371-PA OS=Aedes aegypti GN=AAEL012371 PE=4 SV=1                                 |
| CCG021989.1 | 923  | 42   | 250 | 1.95528587 | 9.46865568  | 2.275780066  | Up   | 7.66E-14  | 2.47E-13   | -                                                                                      |
| CCG006329.1 | 2187 | 46   | 250 | 0.90379872 | 3.996145036 | 2.144535532  | Up   | 3.40E-14  | 1.18E-13   | AAEL007982-PA OS=Aedes aegypti GN=AAEL007982 PE=4 SV=1                                 |
| CCG005144.1 | 1941 | 56   | 250 | 1.23972444 | 4.50261164  | 1.860742566  | Up   | 0         | 0          | AAEL014096-PA (Fragment) OS=Aedes aegypti GN=AAEL014096 PE=4 SV=1                      |
| CCG017433.1 | 524  | 75   | 250 | 6.15024827 | 16.67856716 | 1.439278798  | Up   | 0         | 0          | -                                                                                      |

|             |      |      |     |            |             |              |      |           |           |                                                                                          |
|-------------|------|------|-----|------------|-------------|--------------|------|-----------|-----------|------------------------------------------------------------------------------------------|
| CCG019647.1 | 1947 | 87   | 250 | 1.92006518 | 4.488736103 | 1.225153993  | Up   | 4.60E-13  | 1.20E-12  | AAEL005423-PA OS=Aedes aegypti GN=AAEL005423 PE=4 SV=1                                   |
| CCG009185.1 | 1065 | 1168 | 250 | 47.125493  | 8.206168256 | -2.52172707  | Down | 1.31E-186 | 7.75E-186 | AAEL005255-PA OS=Aedes aegypti GN=AAEL003255 PE=4 SV=1                                   |
| CCG003157.1 | 636  | 3    | 251 | 0.20268743 | 13.79642684 | 6.088894257  | Up   | 5.28E-05  | 8.83E-05  | -                                                                                        |
| CCG006244.2 | 909  | 14   | 251 | 0.66180009 | 9.652945511 | 3.866501836  | Up   | 3.07E-08  | 6.01E-08  | AAEL012339-PA OS=Aedes aegypti GN=AAEL012339 PE=4 SV=1                                   |
| CCG013486.1 | 717  | 27   | 251 | 1.61810716 | 12.23783469 | 2.918969256  | Up   | 2.28E-12  | 5.41E-12  | AAEL013815-PA OS=Aedes aegypti GN=AAEL013815 PE=4 SV=1                                   |
| CCG023378.1 | 867  | 28   | 251 | 1.38771923 | 10.12056225 | 2.866501836  | Up   | 1.17E-12  | 2.86E-12  | -                                                                                        |
| CCG013827.1 | 1318 | 41   | 251 | 1.33669129 | 6.65745635  | 2.316304753  | Up   | 1.02E-13  | 3.20E-13  | AAEL011872-PA OS=Aedes aegypti GN=AAEL011872 PE=4 SV=1                                   |
| CCG022014.1 | 1432 | 51   | 251 | 1.53034669 | 6.127463317 | 2.001431416  | Up   | 0         | 0         | AAEL013384-PA OS=Aedes aegypti GN=AAEL013384 PE=4 SV=1                                   |
| CCG028419.1 | 918  | 87   | 251 | 4.07229511 | 9.558308791 | 1.230913262  | Up   | 3.06E-13  | 8.44E-13  | AAEL006923-PA OS=Aedes aegypti GN=AAEL006923 PE=4 SV=1                                   |
| CCG000365.1 | 1893 | 826  | 251 | 18.7496042 | 4.635249588 | -2.016141214 | Down | 1.39E-100 | 7.39E-100 | Putative uncharacterized protein OS=Culex quinquefasciatus GN=CpipJ_CPIJ004327 PE=4 SV=1 |
| CCG019795.1 | 1317 | 922  | 251 | 30.0820769 | 6.662511367 | -2.174766183 | Down | 1.68E-123 | 9.26E-123 | -                                                                                        |
| CCG013740.1 | 987  | 10   | 252 | 0.43535699 | 8.925517474 | 4.357665032  | Up   | 5.43E-07  | 1.01E-06  | AAEL008941-PA OS=Aedes aegypti GN=AAEL008941 PE=4 SV=1                                   |
| CCG008215.1 | 906  | 15   | 252 | 0.71141945 | 9.723494202 | 3.772702532  | Up   | 1.48E-08  | 2.93E-08  | AAEL013096-PA OS=Aedes aegypti GN=AAEL013096 PE=4 SV=1                                   |
| CCG006631.1 | 1227 | 73   | 252 | 2.55647158 | 7.179694985 | 1.489768568  | Up   | 0         | 0         | Schiffum OS=Culex quinquefasciatus GN=CpipJ_CPIJ000181 PE=4 SV=1                         |
| CCG026744.1 | 816  | 76   | 252 | 4.00208313 | 10.79593841 | 1.431665614  | Up   | 0         | 0         | AAEL000090-PA OS=Aedes aegypti GN=AAEL000090 PE=4 SV=1                                   |
| CCG012458.1 | 789  | 84   | 252 | 4.5747246  | 11.16538117 | 1.287275705  | Up   | 3.86E-14  | 1.33E-13  | AAEL001778-PA OS=Aedes aegypti GN=AAEL001778 PE=4 SV=1                                   |
| CCG020730.1 | 1830 | 930  | 252 | 21.8370782 | 4.813926637 | -2.181493779 | Down | 4.84E-125 | 2.67E-124 | AAEL009014-PA (Fragment) OS=Aedes aegypti GN=AAEL009014 PE=4 SV=1                        |

|             |       |      |     |            |             |              |      |           |           |                                                                            |
|-------------|-------|------|-----|------------|-------------|--------------|------|-----------|-----------|----------------------------------------------------------------------------|
| CCG010159.1 | 838   | 1060 | 252 | 54.3531249 | 10.51251282 | -2.370255422 | Down | 1.43E-157 | 8.19E-157 | AAEL008697-PA OS=Aedes aegypti GN=AAEL008697 PE=4 SV=1                     |
| CCG016810.1 | 1644  | 34   | 253 | 0.88866848 | 5.379832131 | 2.597843937  | Up   | 8.82E-14  | 2.80E-13  | AAEL007446-PA OS=Aedes aegypti GN=AAEL007446 PE=4 SV=1                     |
| CCG021998.1 | 2848  | 45   | 253 | 0.67894595 | 3.105492986 | 2.193453682  | Up   | 0         | 0         | AAEL005690-PA OS=Aedes aegypti GN=AAEL005690 PE=4 SV=1                     |
| CCG002834.1 | 2151  | 48   | 253 | 0.95887832 | 4.111782438 | 2.100344278  | Up   | 5.35E-14  | 1.79E-13  | AAEL005472-PA OS=Aedes aegypti GN=AAEL005472 PE=4 SV=1                     |
| CCG026778.1 | 1361  | 52   | 253 | 1.64175327 | 6.498489363 | 1.98486706   | Up   | 0         | 0         | AAEL014554-PA OS=Aedes aegypti GN=AAEL014554 PE=4 SV=1                     |
| CCG018803.1 | 372   | 59   | 253 | 6.81509232 | 23.77538716 | 1.802663729  | Up   | 0         | 0         | AAEL005382-PA OS=Aedes aegypti GN=AAEL005382 PE=4 SV=1                     |
| CCG003560.1 | 10005 | 66   | 253 | 0.28345852 | 0.884002401 | 1.640912659  | Up   | 0         | 0         | Pharmin OS=Culex quinquefasciatus GN=Cole_CPI001694 PE=4 SV=1              |
| CCG011989.1 | 2754  | 69   | 253 | 1.07658376 | 3.211490205 | 1.576782322  | Up   | 0         | 0         | AAEL003227-PA OS=Aedes aegypti GN=AAEL003227 PE=4 SV=1                     |
| CCG013337.1 | 531   | 79   | 253 | 6.3928607  | 16.65620343 | 1.38152603   | Up   | 0         | 0         | AAEL003794-PA OS=Aedes aegypti GN=AAEL003794 PE=3 SV=1                     |
| CCG004655.1 | 768   | 82   | 253 | 4.58791437 | 11.51620316 | 1.327754774  | Up   | 0         | 0         | AAEL013206-PA OS=Aedes aegypti GN=AAEL013206 PE=4 SV=1                     |
| CCG004645.1 | 2277  | 93   | 253 | 1.7550221  | 3.884252975 | 1.146147967  | Up   | 6.25E-12  | 1.41E-11  | AAEL007970-PA OS=Aedes aegypti GN=AAEL007970 PE=4 SV=1                     |
| CCG027108.1 | 1844  | 797  | 253 | 18.5720599 | 4.796336238 | -1.953129135 | Down | 3.79E-93  | 1.98E-92  | Cytochrome P450 OS=Aedes albopictus GN=CYP6Y7 PE=2 SV=1                    |
| CCG015921.1 | 819   | 979  | 253 | 51.3643104 | 10.79907695 | -2.249858271 | Down | 1.07E-136 | 6.00E-136 | Pyrroline-5-carboxylate reductase OS=Aedes aegypti GN=AAEL007033 PE=3 SV=1 |
| CCG024712.1 | 711   | 2801 | 253 | 169.280206 | 12.43944307 | -3.76641949  | Down | 0         | 0         | AAEL011070-PA OS=Aedes aegypti GN=CTLGA3 PE=2 SV=1                         |
| CCG017672.1 | 1695  | 4208 | 253 | 106.676486 | 5.217961076 | -4.353612211 | Down | 0         | 0         | Uncharacterized protein OS=Anopheles darlingi GN=AND_09568 PE=4 SV=1       |
| CCG008754.1 | 1560  | 7    | 254 | 0.19281291 | 5.691924551 | 4.883642969  | Up   | 4.31E-06  | 7.70E-06  | AAEL003543-PA OS=Aedes aegypti GN=AAEL003543 PE=4 SV=1                     |
| CCG017563.1 | 654   | 23   | 254 | 1.51116804 | 13.57706774 | 3.167435935  | Up   | 4.01E-11  | 8.67E-11  | -                                                                          |

|             |      |     |     |            |             |              |      |          |          |                                                                                  |
|-------------|------|-----|-----|------------|-------------|--------------|------|----------|----------|----------------------------------------------------------------------------------|
| CCG002954.1 | 821  | 39  | 254 | 2.04119324 | 10.81534994 | 2.405595672  | Up   | 7.33E-14 | 2.38E-13 | -                                                                                |
| CCG015904.1 | 930  | 76  | 254 | 3.51150519 | 9.547744409 | 1.443070377  | Up   | 0        | 0        | AAEL011748-PA OS=Aedes aegypti GN=AAEL011748 PE=2 SV=1                           |
| CCG020874.1 | 234  | 81  | 254 | 14.8741389 | 37.94616368 | 1.351147888  | Up   | 4.91E-14 | 1.66E-13 | AAEL000211-PA OS=Aedes aegypti GN=AAEL000211 PE=4 SV=1                           |
| CCG018473.1 | 1591 | 85  | 254 | 2.29568035 | 5.581019673 | 1.281606954  | Up   | 1.73E-14 | 6.10E-14 | Transmembrane protein 15 OS=Culex quinquefasciatus GN=CpipJ_CPIJ002894 PE=4 SV=1 |
| CCG010868.1 | 414  | 86  | 254 | 8.92608014 | 21.44783164 | 1.264733136  | Up   | 0        | 0        | AAEL012108-PA OS=Aedes aegypti GN=AAEL012108 PE=4 SV=1                           |
| CCG008819.1 | 1743 | 441 | 254 | 10.8718606 | 5.094321457 | -1.093636955 | Down | 7.48E-23 | 2.99E-22 | AAEL000523-PA OS=Aedes aegypti GN=AAEL000523 PE=4 SV=1                           |
| CCG000591.1 | 939  | 492 | 254 | 22.5144935 | 9.456232482 | -1.251516615 | Down | 4.91E-31 | 2.08E-30 | Acyl-coenzyme A oxidase OS=Aedes aegypti GN=AAEL008574 PE=3 SV=1                 |
| CCG025944.1 | 2080 | 673 | 254 | 13.9031882 | 4.268943414 | -1.703464804 | Down | 1.42E-65 | 6.93E-65 | -                                                                                |
| CCG023738.1 | 9026 | 696 | 254 | 3.31342071 | 0.983758287 | -1.751945605 | Down | 1.93E-70 | 9.55E-70 | AAEL013413-PA OS=Aedes aegypti GN=AAEL013413 PE=4 SV=1                           |
| CCG027444.1 | 1662 | 790 | 254 | 20.4248438 | 5.342600662 | -1.934710952 | Down | 3.42E-91 | 1.78E-90 | AAEL001517-PA OS=Aedes aegypti GN=AAEL001517 PE=4 SV=1                           |
| CCG004157.1 | 354  | 0   | 255 | 0.001      | 25.18180954 | 14.62009434  | Up   | 4.44E-16 | 1.63E-15 | -                                                                                |
| CCG023859.1 | 1342 | 19  | 255 | 0.60836435 | 6.642593574 | 3.448739127  | Up   | 7.73E-10 | 1.60E-09 | AAEL014400-PA OS=Aedes aegypti GN=AAEL014400 PE=4 SV=1                           |
| CCG014095.1 | 633  | 33  | 255 | 2.24012834 | 14.08271813 | 2.652272521  | Up   | 1.31E-13 | 4.01E-13 | AAEL004624-PA OS=Aedes aegypti GN=AAEL004624 PE=4 SV=1                           |
| CCG010764.1 | 1079 | 71  | 255 | 2.82748022 | 8.261687282 | 1.546919521  | Up   | 0        | 0        | AAEL005149-PA (Fragment) OS=Aedes aegypti GN=AAEL005149 PE=4 SV=1                |
| CCG003767.1 | 1986 | 90  | 255 | 1.94726894 | 4.488600492 | 1.204813544  | Up   | 5.59E-13 | 1.44E-12 | AAEL002870-PA OS=Aedes aegypti GN=AAEL002870 PE=4 SV=1                           |
| CCG001180.1 | 1193 | 92  | 255 | 3.3136761  | 7.472221774 | 1.173104685  | Up   | 2.07E-12 | 4.93E-12 | AAEL013336-PA OS=Aedes aegypti GN=AAEL013336 PE=4 SV=1                           |
| CCG007964.1 | 1986 | 97  | 255 | 2.09872319 | 4.488600492 | 1.096753798  | Up   | 2.69E-11 | 5.86E-11 | Uncharacterized protein OS=Anopheles darlingi GN=AND_05226 PE=4 SV=1             |

|             |      |      |     |            |             |              |      |           |           |                                                                                                  |
|-------------|------|------|-----|------------|-------------|--------------|------|-----------|-----------|--------------------------------------------------------------------------------------------------|
| CCG004480.1 | 216  | 101  | 255 | 20.0923296 | 41.27018786 | 1.038455158  | Up   | 1.83E-10  | 3.88E-10  | AAEL002121-PA OS=Aedes aegypti GN=AAEL002121 PE=4 SV=1                                           |
| CCG024395.1 | 1581 | 562  | 255 | 15.274504  | 5.638431737 | -1.43775968  | Down | 2.99E-43  | 1.35E-42  | Subunit-dependent prospanate transporter OS=Culex quinquefasciatus GN=CpipJ_CPIJ001942 PE=4 SV=1 |
| CCG006400.1 | 1647 | 644  | 255 | 16.8017663 | 5.412483653 | -1.634250237 | Down | 2.79E-59  | 1.34E-58  | AAEL000311-PA OS=Aedes aegypti GN=AAEL000311 PE=4 SV=1                                           |
| CCG023089.2 | 1365 | 1077 | 255 | 33.9035928 | 6.530667089 | -2.376135894 | Down | 1.52E-160 | 8.73E-160 | AAEL010480-PA OS=Aedes aegypti GN=AAEL010480 PE=1 SV=1                                           |
| CCG027186.1 | 2555 | 41   | 256 | 0.6895339  | 3.502668827 | 2.344761199  | Up   | 1.02E-13  | 3.19E-13  | Putative uncharacterized protein OS=Culex quinquefasciatus GN=CpipJ_CPIJ003369 PE=4 SV=1         |
| CCG027957.1 | 813  | 49   | 256 | 2.5898118  | 11.00777227 | 2.08760336   | Up   | 0         | 0         | AAEL007983-PA OS=Aedes aegypti GN=AAEL007983 PE=4 SV=1                                           |
| CCG008285.1 | 635  | 56   | 256 | 3.78945691 | 14.09341552 | 1.894958282  | Up   | 0         | 0         | AAEL000477-PA OS=Aedes aegypti GN=AAEL000477 PE=4 SV=1                                           |
| CCG013673.1 | 573  | 82   | 256 | 6.14924649 | 15.61835751 | 1.344761199  | Up   | 0         | 0         | AAEL004623-PA OS=Aedes aegypti GN=AAEL004623 PE=4 SV=1                                           |
| CCG019063.1 | 2685 | 86   | 256 | 1.3763118  | 3.333079648 | 1.276048449  | Up   | 0         | 0         | AAEL001217-PA OS=Aedes aegypti GN=AAEL001217 PE=4 SV=1                                           |
| CCG017972.1 | 2472 | 711  | 256 | 12.3590135 | 3.620274617 | -1.771392546 | Down | 5.06E-73  | 2.53E-72  | AAEL004090-PA (Fragment) OS=Aedes aegypti GN=AAEL004090 PE=4 SV=1                                |
| CCG003998.1 | 1131 | 33   | 257 | 1.25375883 | 7.94365794  | 2.663543634  | Up   | 1.31E-13  | 4.00E-13  | AAEL007607-PA OS=Aedes aegypti GN=AAEL007607 PE=4 SV=1                                           |
| CCG026365.1 | 653  | 41   | 257 | 2.69794658 | 13.75846421 | 2.350385748  | Up   | 1.02E-13  | 3.20E-13  | Stam1 OS=Culex quinquefasciatus GN=CpipJ_CPIJ013090 PE=4 SV=1                                    |
| CCG001170.1 | 1108 | 51   | 257 | 1.9778488  | 8.108553367 | 2.035512411  | Up   | 0         | 0         | AAEL009399-PA OS=Aedes aegypti GN=AAEL009399 PE=4 SV=1                                           |
| CCG027769.1 | 2074 | 84   | 257 | 1.74033641 | 4.331859754 | 1.31562033   | Up   | 0         | 0         | Modifier of mag4 OS=Culex quinquefasciatus GN=CpipJ_CPIJ001651 PE=4 SV=1                         |
| CCG016761.1 | 832  | 530  | 257 | 27.3725473 | 10.79841001 | -1.341910796 | Down | 5.97E-37  | 2.62E-36  | AAEL001184-PA OS=Aedes aegypti GN=AAEL001184 PE=4 SV=1                                           |



|             |      |      |     |            |             |              |      |           |           |                                                                      |
|-------------|------|------|-----|------------|-------------|--------------|------|-----------|-----------|----------------------------------------------------------------------|
| CCG001470.1 | 1425 | 51   | 258 | 1.53786419 | 6.329288005 | 2.041115117  | Up   | 0         | 0         | AAEL014744-PA OS=Aedes aegypti GN=AAEL014744 PE=4 SV=1               |
| CCG001544.1 | 189  | 86   | 258 | 19.552366  | 47.72082226 | 1.287275705  | Up   | 0         | 0         | AAEL009092-PA OS=Aedes aegypti GN=AAEL009092 PE=3 SV=1               |
| CCG009027.1 | 1146 | 91   | 258 | 3.41208189 | 7.870187964 | 1.205745819  | Up   | 3.90E-13  | 1.04E-12  | AAEL012767-PA OS=Aedes aegypti GN=AAEL012767 PE=4 SV=1               |
| CCG018496.1 | 795  | 558  | 258 | 30.1598892 | 11.3449502  | -1.410580853 | Down | 8.97E-42  | 4.03E-41  | AAEL011081-PA OS=Aedes aegypti GN=AAEL011081 PE=4 SV=1               |
| CCG020018.1 | 8084 | 889  | 258 | 4.72539511 | 1.115689684 | -2.08249915  | Down | 9.49E-113 | 5.12E-112 | AAEL008307-PA OS=Aedes aegypti GN=AAEL008307 PE=4 SV=1               |
| CCG001011.2 | 1284 | 1594 | 258 | 53.3440475 | 7.024326641 | -2.924895455 | Down | 3.73E-299 | 2.35E-298 | AAEL001232-PA OS=Aedes aegypti GN=AAEL001232 PE=3 SV=1               |
| CCG016330.1 | 2752 | 5351 | 258 | 83.5505269 | 3.277338447 | -4.672052354 | Down | 0         | 0         | Uncharacterized protein OS=Anopheles darlingi GN=AND_16398 PE=4 SV=1 |
| CCG021340.1 | 1038 | 5802 | 258 | 240.18343  | 8.689051452 | -4.788794121 | Down | 0         | 0         | AAEL000213-PA OS=Aedes aegypti GN=AAEL000213 PE=4 SV=1               |
| CCG007437.1 | 603  | 32   | 259 | 2.28031759 | 15.01524657 | 2.719121492  | Up   | 1.77E-13  | 5.17E-13  | AAEL011589-PA OS=Aedes aegypti GN=AAEL011589 PE=4 SV=1               |
| CCG003535.1 | 1412 | 38   | 259 | 1.15640929 | 6.412318473 | 2.471193978  | Up   | 4.26E-14  | 1.45E-13  | AAEL002045-PA OS=Aedes aegypti GN=AAEL002045 PE=4 SV=1               |
| CCG005349.1 | 565  | 57   | 259 | 4.33499977 | 16.02512156 | 1.886231477  | Up   | 0         | 0         | AAEL003965-PA OS=Aedes aegypti GN=AAEL003965 PE=4 SV=1               |
| CCG026819.1 | 691  | 72   | 259 | 4.47730954 | 13.10302993 | 1.54919649   | Up   | 0         | 0         | AAEL008656-PA OS=Aedes aegypti GN=AAEL008656 PE=4 SV=1               |
| CCG000914.1 | 1493 | 77   | 259 | 2.21612161 | 6.064429795 | 1.452334951  | Up   | 0         | 0         | AAEL013054-PA OS=Aedes aegypti GN=AAEL013054 PE=4 SV=1               |
| CCG008155.1 | 614  | 104  | 259 | 7.27826124 | 14.74624379 | 1.018681773  | Up   | 2.54E-10  | 5.35E-10  | GK21198 OS=Drosophila willistoni GN=GK21198 PE=4 SV=1                |
| CCG025334.1 | 3315 | 457  | 259 | 5.92373114 | 2.731280146 | -1.116928864 | Down | 2.16E-24  | 8.73E-24  | AAEL011038-PA OS=Aedes aegypti GN=AAEL011038 PE=3 SV=1               |
| CCG017782.2 | 2964 | 587  | 259 | 8.5098631  | 3.054721216 | -1.478095202 | Down | 5.98E-47  | 2.75E-46  | AAEL006825-PA OS=Aedes aegypti GN=AAEL006825 PE=4 SV=1               |

|             |      |      |     |            |             |              |      |          |            |                                                                                                         |
|-------------|------|------|-----|------------|-------------|--------------|------|----------|------------|---------------------------------------------------------------------------------------------------------|
| CCG010853.1 | 2025 | 732  | 259 | 15.5327633 | 4.471206758 | -1.796578347 | Down | 1.36E-76 | 6.83E-76   | AAEL004479-PA (Fragment)<br>OS=Aedes aegypti<br>GN=AAEL004479 PE=4 SV=1                                 |
| CCG010648.1 | 425  | 1    | 260 | 0.10110526 | 21.38623991 | 7.724681017  | Up   | 0.000587 | 0.00091859 | Histone H2B OS=Aedes aegypti<br>GN=AAEL015674 PE=3 SV=1                                                 |
| CCG014288.1 | 1413 | 4    | 260 | 0.12164115 | 6.43252085  | 5.724681017  | Up   | 2.95E-05 | 5.04E-05   | AAEL014380-PA OS=Aedes<br>aegypti GN=AAEL014380 PE=4<br>SV=1                                            |
| CCG013606.1 | 657  | 9    | 260 | 0.5886265  | 13.83432566 | 4.554756015  | Up   | 1.09E-06 | 2.01E-06   | -                                                                                                       |
| CCG002977.1 | 932  | 34   | 260 | 1.56756543 | 9.752308971 | 2.637218176  | Up   | 8.82E-14 | 2.80E-13   | Putative uncharacterized protein<br>OS=Culex quinquefasciatus<br>GN=CpipJ_CPIJ016896 PE=4<br>SV=1       |
| CCG020716.1 | 2117 | 43   | 260 | 0.87279102 | 4.293411413 | 2.298416262  | Up   | 8.46E-14 | 2.70E-13   | AAEL003176-PA OS=Aedes<br>aegypti GN=AAEL003176 PE=4<br>SV=1                                            |
| CCG013447.1 | 1111 | 46   | 260 | 1.77912493 | 8.18105487  | 2.201119061  | Up   | 3.40E-14 | 1.18E-13   | AAEL003916-PA OS=Aedes<br>aegypti GN=AAEL003916 PE=4<br>SV=1                                            |
| CCG016511.1 | 500  | 59   | 260 | 5.07042868 | 18.17830392 | 1.842037967  | Up   | 0        | 0          | AAEL012167-PA OS=Aedes<br>aegypti GN=AAEL012167 PE=4<br>SV=1                                            |
| CCG008475.1 | 1042 | 68   | 260 | 2.80416694 | 8.722794588 | 1.637218176  | Up   | 0        | 0          | AAEL005638-PA OS=Aedes<br>aegypti GN=AAEL005638 PE=4<br>SV=1                                            |
| CCG027035.1 | 1509 | 99   | 260 | 2.81908796 | 6.023294871 | 1.095324397  | Up   | 1.80E-11 | 3.96E-11   | AAEL006353-PA OS=Aedes<br>aegypti GN=AAEL006353 PE=4<br>SV=1                                            |
| CCG007155.1 | 633  | 102  | 260 | 6.92403307 | 14.35884986 | 1.052255675  | Up   | 7.66E-11 | 1.64E-10   | AGAP010064-PA OS=Anopheles<br>gambiae GN=AGAP010064 PE=4<br>SV=1                                        |
| CCG013255.1 | 4449 | 586  | 260 | 5.65975826 | 2.042965152 | -1.470075838 | Down | 1.67E-46 | 7.67E-46   | AAEL006955-PA OS=Aedes<br>aegypti GN=AAEL006955 PE=4<br>SV=1                                            |
| CCG016535.1 | 4242 | 1828 | 260 | 18.5168965 | 2.142657228 | -3.111369338 | Down | 0        | 0          | AGAP007349-PA (Fragment)<br>OS=Anopheles gambiae<br>GN=AGAP007349 PE=4 SV=4                             |
| CCG008846.1 | 1476 | 10   | 261 | 0.29112286 | 6.181646502 | 4.408291106  | Up   | 5.43E-07 | 1.01E-06   | AAEL000980-PA OS=Aedes<br>aegypti GN=AAEL000980 PE=4<br>SV=1                                            |
| CCG021759.1 | 1427 | 14   | 261 | 0.42156712 | 6.393910468 | 3.922864278  | Up   | 3.07E-08 | 6.01E-08   | Terminal deoxycytidyl transferase<br>rev1 OS=Culex quinquefasciatus<br>GN=CpipJ_CPIJ007351 PE=4<br>SV=1 |

|             |      |      |     |            |             |              |      |          |          |                                                                                                   |
|-------------|------|------|-----|------------|-------------|--------------|------|----------|----------|---------------------------------------------------------------------------------------------------|
| CCG003085.1 | 786  | 24   | 261 | 1.31205297 | 11.60828274 | 3.1452567    | Up   | 1.93E-11 | 4.24E-11 | Putative uncharacterized protein<br>OS=Culex quinquefasciatus<br>GN=CpipJ_CPIJ010852 PE=4<br>SV=1 |
| CCG013143.1 | 1426 | 35   | 261 | 1.05465688 | 6.398394276 | 2.600936183  | Up   | 6.39E-14 | 2.11E-13 | AAEL004040-PA OS=Aedes<br>aegypti GN=AAEL004646 PE=3<br>SV=1                                      |
| CCG017140.1 | 2352 | 86   | 261 | 1.57117227 | 3.87929857  | 1.303954446  | Up   | 0        | 0        | AAEL005631-PA OS=Aedes<br>aegypti GN=AAEL005631 PE=4<br>SV=1                                      |
| CCG026827.1 | 480  | 94   | 261 | 8.41490636 | 19.00856299 | 1.175630349  | Up   | 9.14E-13 | 2.28E-12 | AAEL009911-PA OS=Aedes<br>aegypti GN=AAEL009911 PE=4<br>SV=1                                      |
| CCG017982.1 | 954  | 689  | 261 | 31.0336972 | 9.564056853 | -1.698140972 | Down | 8.46E-67 | 4.15E-66 | AAEL004080-PA OS=Aedes<br>aegypti GN=AAEL004086 PE=4<br>SV=1                                      |
| CCG011722.1 | 1302 | 2675 | 261 | 88.2826729 | 7.007765159 | -3.655103976 | Down | 0        | 0        | AAEL013637-PA OS=Aedes<br>aegypti GN=AAEL013637 PE=4<br>SV=1                                      |
| CCG027270.1 | 642  | 23   | 262 | 1.53941417 | 14.26646186 | 3.212174249  | Up   | 4.01E-11 | 8.66E-11 | AAEL004121-PA OS=Aedes<br>aegypti GN=AAEL004121 PE=4<br>SV=1                                      |
| CCG005561.1 | 722  | 35   | 262 | 2.08302038 | 12.68569046 | 2.606453188  | Up   | 6.39E-14 | 2.11E-13 | -                                                                                                 |
| CCG004020.1 | 1836 | 59   | 262 | 1.3808357  | 4.988599409 | 1.853093156  | Up   | 0        | 0        | AAEL005684-PA OS=Aedes<br>aegypti GN=AAEL005684 PE=3<br>SV=1                                      |
| CCG021099.1 | 1896 | 97   | 262 | 2.19834613 | 4.830732339 | 1.135823363  | Up   | 3.78E-12 | 8.77E-12 | AAEL001982-PA OS=Aedes<br>aegypti GN=AAEL001982 PE=4<br>SV=1                                      |
| CCG020665.1 | 3384 | 653  | 262 | 8.29173661 | 2.70658053  | -1.615202976 | Down | 4.25E-59 | 2.04E-58 | AAEL007670-PA (Fragment)<br>OS=Aedes aegypti<br>GN=AAEL007670 PE=4 SV=1                           |
| CCG015127.2 | 2805 | 659  | 262 | 10.0952068 | 3.265265068 | -1.62839845  | Down | 2.58E-60 | 1.25E-59 | AAEL005397-PA OS=Aedes<br>aegypti GN=AAEL005397 PE=4<br>SV=1                                      |
| CCG028096.1 | 3840 | 662  | 262 | 7.40780321 | 2.385174092 | -1.634951201 | Down | 6.32E-61 | 3.06E-60 | AAEL005906-PA OS=Aedes<br>aegypti GN=AAEL005908 PE=4<br>SV=1                                      |
| CCG026950.1 | 858  | 30   | 263 | 1.50243827 | 10.71564894 | 2.834341598  | Up   | 3.71E-13 | 9.96E-13 | AAEL004315-PA OS=Aedes<br>aegypti GN=AAEL004315 PE=4<br>SV=1                                      |
| CCG019079.1 | 1194 | 34   | 263 | 1.22359378 | 7.700189942 | 2.653769352  | Up   | 8.82E-14 | 2.80E-13 | AGAP004623-PA OS=Anopheles<br>gambiae GN=AgaP_AGAP004623<br>PE=4 SV=5                             |
| CCG004076.1 | 894  | 42   | 263 | 2.01871236 | 10.2841463  | 2.34891477   | Up   | 7.66E-14 | 2.47E-13 | AAEL015062-PA OS=Aedes<br>aegypti GN=AAEL015062 PE=4<br>SV=1                                      |

|             |      |      |     |            |             |              |      |           |           |                                                                       |
|-------------|------|------|-----|------------|-------------|--------------|------|-----------|-----------|-----------------------------------------------------------------------|
| CCG015984.1 | 276  | 57   | 263 | 8.87418432 | 33.31169127 | 1.908342179  | Up   | 0         | 0         | AAEL010119-PA OS=Aedes aegypti GN=AAEL010119 PE=4 SV=1                |
| CCG007396.1 | 390  | 83   | 263 | 9.14484096 | 23.57442767 | 1.366192762  | Up   | 1.33E-13  | 4.03E-13  | AAEL004069-PA OS=Aedes aegypti GN=AAEL004069 PE=4 SV=1                |
| CCG012093.1 | 303  | 437  | 263 | 61.9728516 | 30.34332274 | -1.030257276 | Down | 1.09E-20  | 4.26E-20  | AAEL010095-PA (Fragment) OS=Aedes aegypti GN=AAEL010095 PE=2 SV=1     |
| CCG025382.1 | 2224 | 567  | 263 | 10.9549638 | 4.134004852 | -1.405972732 | Down | 3.23E-42  | 1.46E-41  | AAEL004544-PA OS=Aedes aegypti GN=AAEL004544 PE=4 SV=1                |
| CCG004025.1 | 2220 | 1007 | 263 | 19.4912265 | 4.14145351  | -2.234615775 | Down | 2.27E-139 | 1.27E-138 | CD109 antigen OS=Culex quinquefasciatus GN=CpipJ_CPIJ020143 PE=4 SV=1 |
| CCG007800.1 | 1439 | 3006 | 263 | 89.7616555 | 6.389177756 | -3.812397101 | Down | 0         | 0         | AAEL015304-PA OS=Aedes aegypti GN=AAEL015304 PE=4 SV=1                |
| CCG025369.1 | 765  | 29   | 264 | 1.62891804 | 12.06403277 | 2.888726328  | Up   | 6.66E-13  | 1.69E-12  | AAEL006603-PA OS=Aedes aegypti GN=AAEL006603 PE=4 SV=1                |
| CCG027016.1 | 384  | 36   | 264 | 4.02841262 | 24.03381528 | 2.576782322  | Up   | 6.13E-14  | 2.03E-13  | AAEL000755-PA OS=Aedes aegypti GN=AAEL000755 PE=4 SV=1                |
| CCG020605.1 | 1578 | 52   | 264 | 1.41598618 | 5.848532996 | 2.046267605  | Up   | 0         | 0         | AAEL002151-PA OS=Aedes aegypti GN=AAEL002151 PE=4 SV=1                |
| CCG002757.1 | 1044 | 65   | 264 | 2.67531873 | 8.840024011 | 1.72433951   | Up   | 0         | 0         | AAEL005725-PA OS=Aedes aegypti GN=AAEL005725 PE=4 SV=1                |
| CCG021717.1 | 2826 | 75   | 264 | 1.14038574 | 3.265741355 | 1.517888633  | Up   | 0         | 0         | AAEL005033-PA OS=Aedes aegypti GN=AAEL005033 PE=4 SV=1                |
| CCG019217.1 | 1824 | 80   | 264 | 1.88463748 | 5.059750585 | 1.424779228  | Up   | 0         | 0         | AAEL011781-PA OS=Aedes aegypti GN=AAEL011781 PE=4 SV=1                |
| CCG007343.1 | 489  | 1816 | 264 | 159.576765 | 18.8731801  | -3.079841164 | Down | 0         | 0         | AAEL009066-PA OS=Aedes aegypti GN=AAEL009066 PE=4 SV=1                |
| CCG012028.1 | 318  | 3580 | 264 | 483.747327 | 29.02196562 | -4.059036549 | Down | 0         | 0         | AAEL013515-PA OS=Aedes aegypti GN=AAEL013515 PE=4 SV=1                |
| CCG024095.1 | 564  | 26   | 265 | 1.98087429 | 16.42543146 | 3.051722035  | Up   | 4.60E-12  | 1.05E-11  | AAEL013814-PA OS=Aedes aegypti GN=AAEL013814 PE=4 SV=1                |
| CCG005332.2 | 477  | 34   | 265 | 3.06283224 | 19.42126487 | 2.664698912  | Up   | 8.82E-14  | 2.80E-13  | AAEL013273-PA OS=Aedes aegypti GN=AAEL013273 PE=4 SV=1                |
| CCG025603.1 | 532  | 48   | 265 | 3.87696854 | 17.41342734 | 2.167199253  | Up   | 5.35E-14  | 1.80E-13  | -                                                                     |

|             |       |     |     |            |             |              |      |           |           |                                                                                          |
|-------------|-------|-----|-----|------------|-------------|--------------|------|-----------|-----------|------------------------------------------------------------------------------------------|
| CCG015499.1 | 1340  | 50  | 265 | 1.60334831 | 6.913390556 | 2.108305563  | Up   | 0         | 0         | AAEL013869-PA OS=Aedes aegypti GN=AAEL013869 PE=4 SV=1                                   |
| CCG021161.1 | 1482  | 54  | 265 | 1.56569883 | 6.250973917 | 1.997274251  | Up   | 0         | 0         | AAEL007981-PA OS=Aedes aegypti GN=AAEL007981 PE=4 SV=1                                   |
| CCG020773.1 | 3720  | 60  | 265 | 0.69306024 | 2.490307351 | 1.845271158  | Up   | 0         | 0         | -                                                                                        |
| CCG026228.2 | 12870 | 440 | 265 | 1.46905076 | 0.719809118 | -1.02919796  | Down | 8.65E-21  | 3.40E-20  | AGAP005010-PA OS=Anopheles gambiae GN=AGAP005010 PE=3 SV=4                               |
| CCG018323.1 | 1523  | 480 | 265 | 13.5426609 | 6.082694251 | -1.154728842 | Down | 7.32E-27  | 3.02E-26  | AAEL003674-PA OS=Aedes aegypti GN=AAEL003674 PE=4 SV=1                                   |
| CCG002976.1 | 678   | 11  | 266 | 0.69714909 | 13.71519413 | 4.298164021  | Up   | 2.67E-07  | 5.03E-07  | -                                                                                        |
| CCG021204.1 | 1425  | 21  | 266 | 0.63323819 | 6.525544997 | 3.365278217  | Up   | 1.76E-10  | 3.72E-10  | AAEL011893-PA OS=Aedes aegypti GN=AAEL011893 PE=4 SV=1                                   |
| CCG013359.3 | 1536  | 33  | 266 | 0.92317789 | 6.05397241  | 2.71320152   | Up   | 1.31E-13  | 4.02E-13  | AAEL006827-PA OS=Aedes aegypti GN=CYP12F8 PE=3 SV=1                                      |
| CCG005258.1 | 495   | 52  | 266 | 4.51399232 | 18.78565984 | 2.057155921  | Up   | 0         | 0         | AAEL011767-PA OS=Aedes aegypti GN=AAEL011767 PE=4 SV=1                                   |
| CCG025633.1 | 1082  | 53  | 266 | 2.10480216 | 8.594178948 | 2.029675185  | Up   | 0         | 0         | AAEL006816-PA OS=Aedes aegypti GN=AAEL006816 PE=4 SV=1                                   |
| CCG025459.1 | 1321  | 931 | 266 | 30.2837418 | 7.039289645 | -2.105041718 | Down | 1.25E-119 | 6.83E-119 | -                                                                                        |
| CCG018834.1 | 2271  | 19  | 267 | 0.3595002  | 4.110021972 | 3.515081622  | Up   | 7.73E-10  | 1.60E-09  | AGAP007560-PA OS=Anopheles gambiae GN=AGAP007560 PE=4 SV=4                               |
| CCG001406.1 | 993   | 23  | 267 | 0.99527079 | 9.399657501 | 3.239447179  | Up   | 4.01E-11  | 8.66E-11  | AAEL003004-PA OS=Aedes aegypti GN=AAEL003004 PE=4 SV=1                                   |
| CCG011499.1 | 1596  | 25  | 267 | 0.67308482 | 5.848283144 | 3.119152946  | Up   | 9.32E-12  | 2.08E-11  | Purative uncharacterized protein OS=Culex quinquefasciatus GN=CpipJ_CPIJ005826 PE=4 SV=1 |
| CCG009841.1 | 1632  | 59  | 267 | 1.55344016 | 5.719276898 | 1.880366086  | Up   | 0         | 0         | AAEL010492-PA OS=Aedes aegypti GN=AAEL010492 PE=4 SV=1                                   |
| CCG014799.2 | 1932  | 82  | 267 | 1.8237672  | 4.831190424 | 1.405457131  | Up   | 0         | 0         | Malate dehydrogenase OS=Culex quinquefasciatus GN=CpipJ_CPIJ016732 PE=4 SV=1             |
| CCG004314.1 | 519   | 82  | 267 | 6.78905248 | 17.9843158  | 1.405457131  | Up   | 0         | 0         | AAEL006566-PA OS=Aedes aegypti GN=AAEL006566 PE=4 SV=1                                   |

|             |      |      |     |            |             |              |      |           |           |                                                                                            |
|-------------|------|------|-----|------------|-------------|--------------|------|-----------|-----------|--------------------------------------------------------------------------------------------|
| CCG021657.1 | 1269 | 84   | 267 | 2.84433231 | 7.355287548 | 1.370691713  | Up   | 0         | 0         | AAEL010726-PA OS=Aedes aegypti GN=AAEL010728 PE=4 SV=1                                     |
| CCG014867.1 | 5108 | 92   | 267 | 0.77392631 | 1.827302251 | 1.239447179  | Up   | 7.15E-14  | 2.33E-13  | AAEL014406-PA OS=Aedes aegypti GN=AAEL014406 PE=4 SV=1                                     |
| CCG011051.1 | 1530 | 793  | 267 | 22.2712415 | 6.100562025 | -1.86816792  | Down | 2.42E-87  | 1.25E-86  | Putative uncharacterized protein OS=Culex quinquefasciatus GN=CpipJ_CPIJ009754 PE=4 SV=1   |
| CCG016178.1 | 3477 | 922  | 267 | 11.3943328 | 2.684457837 | -2.085613805 | Down | 4.33E-117 | 2.36E-116 | AAEL012475-PA (Fragment) OS=Aedes aegypti GN=AAEL012475 PE=4 SV=1                          |
| CCG018942.1 | 1497 | 1183 | 267 | 33.9567108 | 6.235043352 | -2.445225223 | Down | 2.78E-182 | 1.63E-181 | AAEL009124-PA OS=Aedes aegypti GN=CYP6N12 PE=3 SV=1                                        |
| CCG008299.1 | 759  | 107  | 268 | 6.05765692 | 12.34363396 | 1.026935408  | Up   | 9.36E-11  | 2.00E-10  | AAEL000625-PA OS=Aedes aegypti GN=AAEL006625 PE=4 SV=1                                     |
| CCG014485.1 | 4287 | 468  | 268 | 4.69088775 | 2.185401954 | -1.101962325 | Down | 1.96E-24  | 7.93E-24  | AAEL004214-PA (Fragment) OS=Aedes aegypti GN=AAEL004214 PE=4 SV=1                          |
| CCG003334.1 | 971  | 583  | 268 | 25.799542  | 9.648628399 | -1.418949679 | Down | 6.01E-44  | 2.73E-43  | Uncharacterized protein OS=Anopheles darlingi GN=AND_16013 PE=4 SV=1                       |
| CCG018090.1 | 663  | 1033 | 268 | 66.9498278 | 14.13094747 | -2.244222145 | Down | 1.10E-143 | 6.23E-143 | AAEL007946-PA OS=Aedes aegypti GN=GSTE6 PE=3 SV=2                                          |
| CCG018139.1 | 2086 | 1286 | 268 | 26.49045   | 4.491283881 | -2.560272533 | Down | 6.84E-209 | 4.10E-208 | AAEL000378-PA OS=Aedes aegypti GN=AAEL000378 PE=4 SV=1                                     |
| CCG020041.1 | 1521 | 6    | 269 | 0.16950586 | 6.182627516 | 5.188813066  | Up   | 8.38E-06  | 1.47E-05  | AAEL004948-PA OS=Aedes aegypti GN=AAEL004948 PE=3 SV=1                                     |
| CCG011109.1 | 549  | 8    | 269 | 0.62615278 | 17.12891886 | 4.773775566  | Up   | 2.19E-06  | 3.96E-06  | -                                                                                          |
| CCG000076.1 | 564  | 24   | 269 | 1.82849935 | 16.6733625  | 3.188813066  | Up   | 1.93E-11  | 4.24E-11  | Putative uncharacterized protein OS=Culex quinquefasciatus GN=CpipJ_CPIJ019728 PE=4 SV=1   |
| CCG019721.1 | 2514 | 27   | 269 | 0.4614888  | 3.740563426 | 3.018888064  | Up   | 2.28E-12  | 5.40E-12  | Leucine-rich transmembrane protein OS=Culex quinquefasciatus GN=CpipJ_CPIJ011619 PE=4 SV=1 |
| CCG009438.1 | 1203 | 33   | 269 | 1.1787209  | 7.816938031 | 2.729381447  | Up   | 1.31E-13  | 4.00E-13  | AAEL004843-PA OS=Aedes aegypti GN=AAEL004843 PE=3 SV=1                                     |

|             |      |      |     |            |             |              |      |           |           |                                                                   |
|-------------|------|------|-----|------------|-------------|--------------|------|-----------|-----------|-------------------------------------------------------------------|
| CCG008759.1 | 1041 | 66   | 269 | 2.72430594 | 9.033406774 | 1.729381447  | Up   | 0         | 0         | AAEL011634-PA OS=Aedes aegypti GN=AAEL011634 PE=4 SV=1            |
| CCG004263.1 | 1341 | 74   | 269 | 2.37118595 | 7.012510404 | 1.564322201  | Up   | 0         | 0         | AGAP003454-PA OS=Anopheles gambiae GN=AgaP_AGAP003454 PE=4 SV=5   |
| CCG003230.1 | 1674 | 88   | 269 | 2.25886299 | 5.617548657 | 1.314343948  | Up   | 3.22E-14  | 1.12E-13  | AAEL007981-PA OS=Aedes aegypti GN=AAEL007981 PE=4 SV=1            |
| CCG025126.1 | 1602 | 101  | 269 | 2.70907815 | 5.870022754 | 1.115564084  | Up   | 3.89E-12  | 9.00E-12  | AAEL011900-PA OS=Aedes aegypti GN=AAEL011900 PE=4 SV=1            |
| CCG001126.1 | 1512 | 104  | 269 | 2.95559021 | 6.21942887  | 1.073335848  | Up   | 1.73E-11  | 3.80E-11  | AAEL005739-PA (Fragment) OS=Aedes aegypti GN=AAEL005739 PE=4 SV=1 |
| CCG003882.1 | 4256 | 1492 | 269 | 15.0636382 | 2.209533941 | -2.769256254 | Down | 2.86E-264 | 1.77E-263 | Adams-20 OS=Culex quinquefasciatus GN=CpipJ_CPIJ010188 PE=4 SV=1  |
| CCG019554.1 | 1572 | 4    | 270 | 0.10933775 | 6.004284178 | 5.779128801  | Up   | 2.95E-05  | 5.03E-05  | AAEL005916-PA OS=Aedes aegypti GN=AAEL005916 PE=4 SV=1            |
| CCG016015.1 | 3642 | 23   | 270 | 0.27136296 | 2.591635016 | 3.255566845  | Up   | 4.01E-11  | 8.68E-11  | AAEL006754-PA OS=Aedes aegypti GN=AAEL006754 PE=4 SV=1            |
| CCG013977.1 | 2476 | 26   | 270 | 0.45121692 | 3.812089955 | 3.078689083  | Up   | 4.60E-12  | 1.05E-11  | AAEL010401-PA OS=Aedes aegypti GN=AAEL010401 PE=4 SV=1            |
| CCG028196.1 | 967  | 44   | 270 | 1.95518958 | 9.760842532 | 2.319697182  | Up   | 3.91E-14  | 1.34E-13  | AAEL010842-PA OS=Aedes aegypti GN=AAEL010842 PE=4 SV=1            |
| CCG019857.1 | 1999 | 46   | 270 | 0.9887983  | 4.721728228 | 2.255566845  | Up   | 3.40E-14  | 1.18E-13  | AAEL010405-PA OS=Aedes aegypti GN=AAEL010405 PE=4 SV=1            |
| CCG011395.1 | 2192 | 56   | 270 | 1.09776694 | 4.305992121 | 1.971773879  | Up   | 0         | 0         | AAEL000322-PA OS=Aedes aegypti GN=AAEL000322 PE=4 SV=1            |
| CCG028486.1 | 2796 | 56   | 270 | 0.86062416 | 3.375799259 | 1.971773879  | Up   | 0         | 0         | AAEL004211-PA OS=Aedes aegypti GN=AAEL004211 PE=4 SV=1            |
| CCG023913.3 | 2460 | 480  | 270 | 8.38433846 | 3.836884036 | -1.127761795 | Down | 6.46E-26  | 2.65E-25  | AAEL000549-PA OS=Aedes aegypti GN=AAEL000549 PE=4 SV=1            |
| CCG001793.1 | 363  | 0    | 271 | 0.001      | 26.09832784 | 14.67166975  | Up   | 4.44E-16  | 1.64E-15  | -                                                                 |
| CCG003330.1 | 1435 | 48   | 271 | 1.43731516 | 6.601876659 | 2.199499744  | Up   | 5.35E-14  | 1.79E-13  | AAEL004838-PA OS=Aedes aegypti GN=AAEL004838 PE=4 SV=1            |

|             |       |      |     |            |             |              |      |           |           |                                                                                                          |
|-------------|-------|------|-----|------------|-------------|--------------|------|-----------|-----------|----------------------------------------------------------------------------------------------------------|
| CCG019597.1 | 754   | 78   | 271 | 4.44514496 | 12.56457958 | 1.499060026  | Up   | 0         | 0         | AAEL007357-PA OS=Aedes aegypti GN=AAEL007357 PE=4 SV=1                                                   |
| CCG026754.1 | 1197  | 87   | 271 | 3.12311354 | 7.914530497 | 1.341518749  | Up   | 0         | 0         | Gastrin zinc finger protein XLCGF52.1 OS=Culex quinquefasciatus GN=CpipJ_CPIJ006243 PE=4 SV=1            |
| CCG013441.1 | 417   | 93   | 271 | 9.58317822 | 22.71868826 | 1.245303434  | Up   | 7.04E-14  | 2.29E-13  | AAEL000702-PA OS=Aedes aegypti GN=AAEL000702 PE=4 SV=1                                                   |
| CCG020768.2 | 19485 | 570  | 271 | 1.25700532 | 0.486204414 | -1.370355864 | Down | 7.37E-41  | 3.30E-40  | AAEL005929-PA OS=Aedes aegypti GN=AAEL005929 PE=3 SV=1                                                   |
| CCG021498.1 | 234   | 0    | 272 | 0.001      | 40.63526189 | 15.31044457  | Up   | 4.44E-16  | 1.65E-15  | Putative secreted protein (Precursor) OS=Aedes aegypti GN=SGP1A2 PE=4 SV=1                               |
| CCG025613.1 | 947   | 22   | 272 | 0.99824093 | 10.04081445 | 3.330344426  | Up   | 8.38E-11  | 1.80E-10  | AAEL008088-PA OS=Aedes aegypti GN=AAEL008088 PE=4 SV=1                                                   |
| CCG012587.1 | 1329  | 34   | 272 | 1.09930096 | 7.154741371 | 2.702313204  | Up   | 8.82E-14  | 2.80E-13  | Zinc finger and BTB domain-containing protein 24 OS=Culex quinquefasciatus GN=CpipJ_CPIJ017225 PE=4 SV=1 |
| CCG017962.1 | 627   | 66   | 272 | 4.52312996 | 15.16531305 | 1.745381926  | Up   | 0         | 0         | AAEL001162-PA OS=Aedes aegypti GN=AAEL001162 PE=4 SV=1                                                   |
| CCG011391.2 | 920   | 70   | 272 | 3.26943633 | 10.33549052 | 1.660493028  | Up   | 0         | 0         | AAEL000660-PA OS=Aedes aegypti GN=AAEL000660 PE=4 SV=1                                                   |
| CCG027658.1 | 1641  | 84   | 272 | 2.19954766 | 5.794424913 | 1.397458622  | Up   | 0         | 0         | AAEL002321-PA OS=Aedes aegypti GN=AAEL002321 PE=3 SV=1                                                   |
| CCG011459.1 | 693   | 96   | 272 | 5.95251735 | 13.72099752 | 1.204813544  | Up   | 0         | 0         | AAEL011952-PA OS=Aedes aegypti GN=AAEL011952 PE=4 SV=1                                                   |
| CCG010570.1 | 3591  | 607  | 272 | 7.26333303 | 2.647911802 | -1.455776661 | Down | 1.98E-47  | 9.15E-47  | AAEL012395-PA OS=Aedes aegypti GN=AAEL012395 PE=3 SV=1                                                   |
| CCG026119.1 | 1341  | 1352 | 272 | 43.3222082 | 7.09071684  | -2.611103391 | Down | 1.70E-224 | 1.03E-223 | AAEL010480-PA OS=Aedes aegypti GN=AAEL010480 PE=1 SV=1                                                   |
| CCG016350.1 | 1317  | 3836 | 272 | 125.157101 | 7.219932636 | -4.11561096  | Down | 0         | 0         | AAEL009863-PA OS=Aedes aegypti GN=AAEL009863 PE=4 SV=1                                                   |
| CCG012317.1 | 1203  | 35   | 273 | 1.25015853 | 7.933175028 | 2.665787328  | Up   | 6.39E-14  | 2.11E-13  | AAEL013688-PA OS=Aedes aegypti GN=AAEL013688 PE=4 SV=1                                                   |



|             |      |      |     |            |             |              |      |           |           |                                                                   |
|-------------|------|------|-----|------------|-------------|--------------|------|-----------|-----------|-------------------------------------------------------------------|
| CCG024785.1 | 956  | 37   | 273 | 1.66305458 | 9.982855187 | 2.585616979  | Up   | 5.17E-14  | 1.74E-13  | AAEL008897-PA OS=Aedes aegypti GN=AAEL008897 PE=4 SV=1            |
| CCG025437.1 | 1581 | 39   | 273 | 1.05997448 | 6.036438684 | 2.509668126  | Up   | 7.33E-14  | 2.37E-13  | AAEL008951-PA OS=Aedes aegypti GN=AAEL008951 PE=4 SV=1            |
| CCG019259.1 | 1034 | 64   | 273 | 2.65963541 | 9.229796479 | 1.795070345  | Up   | 0         | 0         | AAEL014259-PA OS=Aedes aegypti GN=AAEL014259 PE=4 SV=1            |
| CCG002866.6 | 1767 | 80   | 273 | 1.94543224 | 5.401024085 | 1.47314225   | Up   | 0         | 0         | Broad complex isoform Z1 OS=Aedes aegypti GN=BR-C PE=2 SV=1       |
| CCG026397.1 | 1299 | 89   | 273 | 2.94403878 | 7.346889576 | 1.319336914  | Up   | 0         | 0         | AAEL002402-PA OS=Aedes aegypti GN=AAEL002402 PE=4 SV=1            |
| CCG020100.1 | 4947 | 97   | 273 | 0.84254382 | 1.929171126 | 1.195157503  | Up   | 1.90E-13  | 5.49E-13  | AAEL012698-PA (Fragment) OS=Aedes aegypti GN=AAEL012698 PE=3 SV=1 |
| CCG003907.1 | 3111 | 582  | 273 | 8.03869674 | 3.067698347 | -1.389804998 | Down | 1.47E-42  | 6.64E-42  | AAEL009536-PA OS=Aedes aegypti GN=AAEL009536 PE=4 SV=1            |
| CCG003562.2 | 987  | 599  | 273 | 26.0778835 | 9.669310597 | -1.431341848 | Down | 1.10E-45  | 5.04E-45  | AAEL001308-PA OS=Aedes aegypti GN=AAEL001308 PE=4 SV=1            |
| CCG020938.1 | 573  | 27   | 274 | 2.02475189 | 16.71652327 | 3.045457785  | Up   | 2.28E-12  | 5.40E-12  | AAEL000535-PA OS=Aedes aegypti GN=AAEL000535 PE=4 SV=1            |
| CCG010979.1 | 2519 | 45   | 274 | 0.7676213  | 3.802527922 | 2.30849219   | Up   | 0         | 0         | AAEL008443-PA OS=Aedes aegypti GN=AAEL008443 PE=4 SV=1            |
| CCG002611.1 | 933  | 86   | 274 | 3.96076868 | 10.26641783 | 1.374080532  | Up   | 0         | 0         | AAEL011988-PA OS=Aedes aegypti GN=AAEL011988 PE=4 SV=1            |
| CCG022725.1 | 1896 | 93   | 274 | 2.10769268 | 5.051987255 | 1.261186476  | Up   | 5.22E-14  | 1.75E-13  | AAEL003859-PA (Fragment) OS=Aedes aegypti GN=AAEL003859 PE=4 SV=1 |
| CCG027356.1 | 947  | 94   | 274 | 4.26521125 | 10.11464397 | 1.245756435  | Up   | 0         | 0         | AAEL012139-PA OS=Aedes aegypti GN=AAEL012139 PE=4 SV=1            |
| CCG009196.1 | 3945 | 654  | 274 | 7.12349973 | 2.428027335 | -1.552801539 | Down | 5.91E-56  | 2.82E-55  | AAEL004000-PA OS=Aedes aegypti GN=TOLL10 PE=4 SV=1                |
| CCG003703.1 | 1560 | 1355 | 274 | 37.3230708 | 6.140107587 | -2.603731849 | Down | 2.87E-224 | 1.74E-223 | AAEL003686-PA OS=Aedes aegypti GN=SRPN11 PE=3 SV=1                |

|             |      |     |     |            |             |              |      |          |            |                                                                             |
|-------------|------|-----|-----|------------|-------------|--------------|------|----------|------------|-----------------------------------------------------------------------------|
| CCG028110.1 | 636  | 0   | 275 | 0.001      | 15.11560709 | 13.8837513   | Up   | 4.44E-16 | 1.63E-15   | Putative salivary secreted protein 62k-2 OS=Aedes albopictus PE=2 SV=1      |
| CCG002658.1 | 768  | 2   | 275 | 0.11190035 | 12.51761213 | 6.805601012  | Up   | 9.36E-05 | 0.00015402 | AAEL009491-PA OS=Aedes aegypti GN=AAEL009491 PE=4 SV=1                      |
| CCG024116.1 | 533  | 4   | 275 | 0.32247456 | 18.03663436 | 5.805601012  | Up   | 2.95E-05 | 5.04E-05   | -                                                                           |
| CCG022231.1 | 1371 | 4   | 275 | 0.12536757 | 7.012054057 | 5.805601012  | Up   | 2.95E-05 | 5.03E-05   | AAEL013582-PA OS=Aedes aegypti GN=AAEL013582 PE=4 SV=1                      |
| CCG007652.2 | 3033 | 33  | 275 | 0.46752431 | 3.169642635 | 2.761206893  | Up   | 1.31E-13 | 4.01E-13   | AAEL006034-PA OS=Aedes aegypti GN=AAEL006034 PE=4 SV=1                      |
| CCG008094.1 | 1620 | 49  | 275 | 1.29970185 | 5.934275378 | 2.190891168  | Up   | 0        | 0          | AAEL004232-PA OS=Aedes aegypti GN=AAEL004232 PE=4 SV=1                      |
| CCG005250.1 | 1437 | 50  | 275 | 1.49511951 | 6.689997295 | 2.161744822  | Up   | 0        | 0          | AAEL001925-PA OS=Aedes aegypti GN=AAEL001925 PE=4 SV=1                      |
| CCG018990.1 | 1488 | 58  | 275 | 1.67489557 | 6.460703033 | 1.947620017  | Up   | 0        | 0          | Zinc finger protein OS=Culex quinquefasciatus GN=CpipJ_CPIJ018272 PE=4 SV=1 |
| CCG027542.1 | 1998 | 64  | 275 | 1.37640792 | 4.811574631 | 1.805601012  | Up   | 0        | 0          | AAEL012916-PA OS=Aedes aegypti GN=AAEL012916 PE=4 SV=1                      |
| CCG017244.1 | 484  | 77  | 275 | 6.83609414 | 19.86265726 | 1.538814472  | Up   | 0        | 0          | AAEL000301-PA OS=Aedes aegypti GN=AAEL000301 PE=3 SV=1                      |
| CCG008808.1 | 461  | 87  | 275 | 8.10925577 | 20.85363582 | 1.362657516  | Up   | 0        | 0          | AAEL007241-PA OS=Aedes aegypti GN=AAEL007241 PE=4 SV=1                      |
| CCG000077.1 | 1305 | 101 | 275 | 3.32562697 | 7.366686676 | 1.147389529  | Up   | 6.48E-13 | 1.65E-12   | AGAP004026-PB OS=Anopheles gambiae GN=GPRMTH6 PE=4 SV=1                     |
| CCG004208.1 | 1083 | 108 | 275 | 4.28507049 | 8.876755413 | 1.05071351   | Up   | 2.30E-11 | 5.03E-11   | AAEL003244-PA OS=Aedes aegypti GN=AAEL003244 PE=4 SV=1                      |
| CCG006471.1 | 1734 | 703 | 275 | 17.4208324 | 5.544132706 | -1.651779867 | Down | 1.58E-65 | 7.73E-65   | AAEL011923-PA OS=Aedes aegypti GN=AAEL011923 PE=4 SV=1                      |
| CCG014399.1 | 624  | 856 | 275 | 58.9456616 | 15.40629185 | -1.935865974 | Down | 9.81E-99 | 5.19E-98   | AAEL008489-PA OS=Aedes aegypti GN=AAEL008489 PE=2 SV=1                      |

|             |      |     |     |            |             |             |    |          |          |                                                                                                     |
|-------------|------|-----|-----|------------|-------------|-------------|----|----------|----------|-----------------------------------------------------------------------------------------------------|
| CCG012761.1 | 1943 | 4   | 276 | 0.0884606  | 4.965766541 | 5.810837661 | Up | 2.95E-05 | 5.04E-05 | ATP-binding cassette sub-family G member 4 OS=Culex quinquefasciatus GN=CpipJ_CPIJ019125 PE=3 SV=1  |
| CCG019488.1 | 1249 | 42  | 276 | 1.44493903 | 7.724967485 | 2.418520238 | Up | 7.66E-14 | 2.47E-13 | AAEL000600-PA OS=Aedes aegypti GN=AAEL006080 PE=3 SV=1                                              |
| CCG014087.1 | 2562 | 78  | 276 | 1.30821206 | 3.765997029 | 1.525435442 | Up | 0        | 0        | Single-minded OS=Culex quinquefasciatus GN=CpipJ_CPIJ009948 PE=4 SV=1                               |
| CCG001216.1 | 669  | 87  | 276 | 5.58799239 | 14.42224871 | 1.367894165 | Up | 0        | 0        | AAEL004990-PA OS=Aedes aegypti GN=AAEL004990 PE=4 SV=1                                              |
| CCG004402.1 | 3195 | 92  | 276 | 1.23731317 | 3.019869918 | 1.287275705 | Up | 1.75E-14 | 6.18E-14 | DNA-repair protein complementing XP-G cells OS=Culex quinquefasciatus GN=CpipJ_CPIJ004184 PE=4 SV=1 |
| CCG020908.1 | 1719 | 92  | 276 | 2.2997182  | 5.61284723  | 1.287275705 | Up | 1.75E-14 | 6.17E-14 | AAEL014110-PA OS=Aedes aegypti GN=AAEL014110 PE=4 SV=1                                              |
| CCG012729.1 | 1791 | 109 | 276 | 2.61513181 | 5.387205131 | 1.042653336 | Up | 2.82E-11 | 6.14E-11 | AAEL000670-PA OS=Aedes aegypti GN=AAEL008870 PE=4 SV=1                                              |
| CCG010044.1 | 474  | 8   | 277 | 0.72522759 | 20.42920394 | 4.81605537  | Up | 2.19E-06 | 3.96E-06 | Putative uncharacterized protein OS=Culex quinquefasciatus GN=CpipJ_CPIJ017096 PE=4 SV=1            |
| CCG024517.1 | 1710 | 17  | 277 | 0.4271845  | 5.662831968 | 3.728592529 | Up | 3.39E-09 | 6.90E-09 | AAEL004916-PA OS=Aedes aegypti GN=AAEL004916 PE=4 SV=1                                              |
| CCG020302.1 | 1398 | 29  | 277 | 0.89136073 | 6.926639961 | 2.958074375 | Up | 6.66E-13 | 1.69E-12 | Putative uncharacterized protein OS=Culex quinquefasciatus GN=CpipJ_CPIJ000812 PE=4 SV=1            |
| CCG010783.1 | 978  | 37  | 277 | 1.62564436 | 9.90127062  | 2.606602004 | Up | 5.17E-14 | 1.74E-13 | Paralmyosin OS=Culex quinquefasciatus GN=CpipJ_CPIJ002902 PE=4 SV=1                                 |
| CCG007291.1 | 1753 | 50  | 277 | 1.22560566 | 5.523926221 | 2.17219918  | Up | 0        | 0        | AAEL007975-PA OS=Aedes aegypti GN=AAEL007975 PE=4 SV=1                                              |
| CCG017558.1 | 705  | 70  | 277 | 4.26649847 | 13.73537967 | 1.686772353 | Up | 0        | 0        | Hypothetical conserved protein OS=Aedes aegypti PE=2 SV=1                                           |

|             |      |     |     |            |             |              |      |           |           |                                                                                          |
|-------------|------|-----|-----|------------|-------------|--------------|------|-----------|-----------|------------------------------------------------------------------------------------------|
| CCG011006.1 | 627  | 89  | 277 | 6.09937222 | 15.44408719 | 1.340321939  | Up   | 0         | 0         | AAEL010170-PA OS=Aedes aegypti GN=AAEL010170 PE=3 SV=1                                   |
| CCG006371.1 | 419  | 13  | 278 | 1.33318986 | 23.19427433 | 4.120814558  | Up   | 6.34E-08  | 1.23E-07  | -                                                                                        |
| CCG005235.1 | 1563 | 38  | 278 | 1.04468965 | 6.217786912 | 2.573326763  | Up   | 4.26E-14  | 1.45E-13  | AAEL003149-PA OS=Aedes aegypti GN=AAEL003149 PE=4 SV=1                                   |
| CCG024789.1 | 1635 | 62  | 278 | 1.62943336 | 5.943976112 | 1.867057966  | Up   | 0         | 0         | AAEL011904-PA OS=Aedes aegypti GN=AAEL011904 PE=4 SV=1                                   |
| CCG005391.2 | 1329 | 105 | 278 | 3.39490003 | 7.312566548 | 1.107008759  | Up   | 2.17E-12  | 5.15E-12  | AAEL006409-PA OS=Aedes aegypti GN=AAEL006409 PE=4 SV=1                                   |
| CCG011609.1 | 1696 | 108 | 278 | 2.73628027 | 5.730189235 | 1.066366774  | Up   | 1.02E-11  | 2.26E-11  | AAEL013547-PA OS=Aedes aegypti GN=AAEL013547 PE=4 SV=1                                   |
| CCG014670.1 | 3348 | 569 | 278 | 7.30280137 | 2.902748191 | -1.331030566 | Down | 4.54E-39  | 2.02E-38  | AAEL000121-PA (Fragment) OS=Aedes aegypti GN=AAEL000121 PE=4 SV=1                        |
| CCG013382.1 | 561  | 887 | 278 | 67.9396695 | 17.32335284 | -1.971536018 | Down | 9.52E-105 | 5.07E-104 | AAEL006451-PA OS=Aedes aegypti GN=AAEL006451 PE=4 SV=1                                   |
| CCG023093.1 | 1248 | 900 | 278 | 30.9877894 | 7.787180243 | -1.992526915 | Down | 9.50E-108 | 5.09E-107 | AAEL007128-PA OS=Aedes aegypti GN=AAEL007128 PE=4 SV=1                                   |
| CCG025474.1 | 1093 | 29  | 279 | 1.1400936  | 8.923475956 | 2.968453521  | Up   | 6.66E-13  | 1.69E-12  | AAEL004243-PA OS=Aedes aegypti GN=AAEL004243 PE=4 SV=1                                   |
| CCG006579.2 | 1227 | 56  | 279 | 1.96112888 | 7.948948019 | 2.019079594  | Up   | 0         | 0         | AAEL012687-PA OS=Aedes aegypti GN=AAEL012687 PE=4 SV=1                                   |
| CCG006630.1 | 1391 | 71  | 279 | 2.19327905 | 7.011760762 | 1.676687396  | Up   | 0         | 0         | Putative uncharacterized protein OS=Culex quinquefasciatus GN=CpipJ_CPIJ000180 PE=4 SV=1 |
| CCG027251.1 | 1173 | 74  | 279 | 2.71079315 | 8.314884245 | 1.61698115   | Up   | 0         | 0         | Uncharacterized protein OS=Anopheles darlingi GN=AND_16470 PE=4 SV=1                     |
| CCG020478.1 | 1056 | 75  | 279 | 3.05182774 | 9.236135624 | 1.597615825  | Up   | 0         | 0         | -                                                                                        |
| CCG006736.1 | 640  | 103 | 279 | 6.91544166 | 15.23962378 | 1.139933988  | Up   | 5.82E-13  | 1.49E-12  | AAEL000535-PA OS=Aedes aegypti GN=AAEL000535 PE=4 SV=1                                   |
| CCG016181.1 | 1002 | 106 | 279 | 4.54570047 | 9.733891437 | 1.098514061  | Up   | 2.85E-12  | 6.68E-12  | GH regulated tbc protein-1 OS=Culex quinquefasciatus GN=CpipJ_CPIJ006102 PE=4 SV=1       |

|             |       |      |     |            |             |              |      |           |           |                                                                                   |
|-------------|-------|------|-----|------------|-------------|--------------|------|-----------|-----------|-----------------------------------------------------------------------------------|
| CCG011510.1 | 728   | 574  | 279 | 33.8799831 | 13.39747146 | -1.338472411 | Down | 1.00E-39  | 4.47E-39  | AAEL007054-PA OS=Aedes aegypti GN=AAEL007054 PE=4 SV=1                            |
| CCG010280.1 | 1554  | 1435 | 279 | 39.6792594 | 6.276292934 | -2.660400506 | Down | 3.12E-243 | 1.91E-242 | AAEL002688-PA OS=Aedes aegypti GN=AAEL002688 PE=3 SV=1                            |
| CCG018537.1 | 2650  | 2099 | 279 | 34.0352728 | 3.680512913 | -3.209051936 | Down | 0         | 0         | AAEL008658-PA OS=Aedes aegypti GN=AAEL008658 PE=4 SV=1                            |
| CCG000159.1 | 1902  | 7    | 280 | 0.15814308 | 5.146328862 | 5.024241299  | Up   | 4.31E-06  | 7.70E-06  | AAEL002921-PA OS=Aedes aegypti GN=AAEL002921 PE=4 SV=1                            |
| CCG014037.1 | 753   | 41   | 280 | 2.33965354 | 12.99909362 | 2.474044216  | Up   | 1.02E-13  | 3.19E-13  | AAEL013188-PA OS=Aedes aegypti GN=AAEL013188 PE=4 SV=1                            |
| CCG001794.1 | 486   | 50   | 280 | 4.42075459 | 20.14057098 | 2.187740031  | Up   | 0         | 0         | AAEL002487-PA OS=Aedes aegypti GN=AAEL002487 PE=2 SV=1                            |
| CCG027865.1 | 906   | 83   | 280 | 3.93652094 | 10.80388245 | 1.456556789  | Up   | 1.32E-13  | 4.01E-13  | AAEL012387-PA OS=Aedes aegypti GN=AAEL012387 PE=4 SV=1                            |
| CCG010657.1 | 3735  | 87   | 280 | 1.00090145 | 2.620700802 | 1.388652725  | Up   | 0         | 0         | AAEL010619-PA OS=Aedes aegypti GN=AAEL010619 PE=3 SV=1                            |
| CCG020929.1 | 1752  | 101  | 280 | 2.47713653 | 5.58693921  | 1.173384738  | Up   | 9.70E-14  | 3.05E-13  | B250208117 KIK protein OS=Culex quinquefasciatus GN=CpipJ_CPIJ005754 PE=4 SV=1    |
| CCG022766.1 | 2292  | 101  | 280 | 1.89351797 | 4.270644632 | 1.173384738  | Up   | 9.70E-14  | 3.05E-13  | AAEL010135-PA OS=Aedes aegypti GN=AAEL010135 PE=4 SV=1                            |
| CCG004074.1 | 437   | 1827 | 280 | 179.646923 | 22.39889587 | -3.003664698 | Down | 0         | 0         | -                                                                                 |
| CCG002133.1 | 11878 | 2952 | 280 | 10.6791258 | 0.824071182 | -3.695880785 | Down | 0         | 0         | AAEL001818-PA OS=Aedes aegypti GN=AAEL001818 PE=4 SV=1                            |
| CCG026777.1 | 420   | 16   | 281 | 1.63694227 | 23.38875184 | 3.836739524  | Up   | 7.09E-09  | 1.42E-08  | AAEL007250-PA OS=Aedes aegypti GN=AAEL007250 PE=4 SV=1                            |
| CCG025502.1 | 804   | 60   | 281 | 3.20669661 | 12.21800469 | 1.929848928  | Up   | 0         | 0         | AAEL012915-PA OS=Aedes aegypti GN=AAEL012915 PE=4 SV=1                            |
| CCG008403.1 | 1143  | 66   | 281 | 2.48119202 | 8.594292015 | 1.792345405  | Up   | 0         | 0         | UDP-galactose transporter OS=Culex quinquefasciatus GN=CpipJ_CPIJ007457 PE=4 SV=1 |
| CCG007636.1 | 633   | 66   | 281 | 4.48025669 | 15.51860312 | 1.792345405  | Up   | 0         | 0         | AAEL000215-PA OS=Aedes aegypti GN=AAEL000215 PE=3 SV=1                            |
| CCG016847.1 | 1423  | 114  | 281 | 3.44241022 | 6.903215582 | 1.00384951   | Up   | 7.50E-11  | 1.61E-10  | AAEL008876-PA OS=Aedes aegypti GN=AAEL008876 PE=4 SV=1                            |

|             |       |     |     |            |             |              |      |           |           |                                                                                                   |
|-------------|-------|-----|-----|------------|-------------|--------------|------|-----------|-----------|---------------------------------------------------------------------------------------------------|
| CCG017331.1 | 18363 | 488 | 281 | 1.14192836 | 0.534949397 | -1.093997814 | Down | 3.95E-25  | 1.61E-24  | Amidophosphoribosyltransferase<br>OS=Aedes aegypti<br>GN=AAEL003581 PE=3 SV=1                     |
| CCG024358.1 | 2166  | 560 | 281 | 11.109442  | 4.535215038 | -1.292543493 | Down | 7.83E-37  | 3.43E-36  | AAEL014679-PA OS=Aedes<br>aegypti GN=AAEL014679 PE=4<br>SV=1                                      |
| CCG000528.1 | 2727  | 919 | 281 | 14.4808163 | 3.602228006 | -2.007181527 | Down | 4.78E-111 | 2.57E-110 | AAEL010294-PA OS=Aedes<br>aegypti GN=AAEL010294 PE=4<br>SV=1                                      |
| CCG025418.1 | 1182  | 10  | 282 | 0.36353413 | 8.340299535 | 4.519936461  | Up   | 5.43E-07  | 1.01E-06  | AAEL009465-PA OS=Aedes<br>aegypti GN=AAEL009465 PE=4<br>SV=1                                      |
| CCG016163.1 | 1356  | 49  | 282 | 1.55274115 | 7.270084108 | 2.227154712  | Up   | 0         | 0         | CpJ0B OS=Culex<br>quinquefasciatus<br>GN=CpipJ_CPIJ006746 PE=4<br>SV=1                            |
| CCG015495.1 | 588   | 59  | 282 | 4.31158902 | 16.76570417 | 1.959221507  | Up   | 0         | 0         | AAEL005789-PA OS=Aedes<br>aegypti GN=AAEL005789 PE=4<br>SV=1                                      |
| CCG022529.1 | 1095  | 76  | 282 | 2.98237427 | 9.00295347  | 1.593937043  | Up   | 0         | 0         | Putative uncharacterized protein<br>OS=Culex quinquefasciatus<br>GN=CpipJ_CPIJ006253 PE=4<br>SV=1 |
| CCG004122.1 | 1704  | 112 | 282 | 2.82430181 | 5.785348621 | 1.034509634  | Up   | 2.31E-11  | 5.04E-11  | AAEL007839-PA OS=Aedes<br>aegypti GN=AAEL007839 PE=4<br>SV=1                                      |
| CCG028246.1 | 318   | 543 | 282 | 73.3728487 | 31.00073601 | -1.242943832 | Down | 9.93E-34  | 4.27E-33  | AAEL013515-PA OS=Aedes<br>aegypti GN=AAEL013515 PE=4<br>SV=1                                      |
| CCG026404.1 | 660   | 21  | 283 | 1.36721883 | 14.98968534 | 3.454654024  | Up   | 1.76E-10  | 3.73E-10  | AAEL000672-PA OS=Aedes<br>aegypti GN=AAEL000672 PE=3<br>SV=1                                      |
| CCG016750.1 | 2351  | 26  | 283 | 0.47520761 | 4.208078403 | 3.146531729  | Up   | 4.60E-12  | 1.05E-11  | Putative uncharacterized protein<br>OS=Culex quinquefasciatus<br>GN=CpipJ_CPIJ007173 PE=4<br>SV=1 |
| CCG017566.1 | 1250  | 40  | 283 | 1.37503151 | 7.914553861 | 2.525043352  | Up   | 6.86E-14  | 2.25E-13  | AAEL006856-PA OS=Aedes<br>aegypti GN=AAEL006856 PE=4<br>SV=1                                      |
| CCG002852.1 | 1194  | 58  | 283 | 2.08730704 | 8.285755717 | 1.988990452  | Up   | 0         | 0         | AAEL002848-PA (Fragment)<br>OS=Aedes aegypti<br>GN=AAEL002848 PE=3 SV=1                           |
| CCG023515.1 | 2440  | 83  | 283 | 1.4616754  | 4.054587019 | 1.471932015  | Up   | 1.32E-13  | 4.01E-13  | AAEL007417-PA OS=Aedes<br>aegypti GN=AAEL007417 PE=4<br>SV=1                                      |
| CCG012893.1 | 1599  | 83  | 283 | 2.23044901 | 6.187112149 | 1.471932015  | Up   | 1.32E-13  | 4.02E-13  | AAEL009499-PA OS=Aedes<br>aegypti GN=AAEL009499 PE=4<br>SV=1                                      |

|             |      |      |     |            |             |              |      |           |           |                                                                         |
|-------------|------|------|-----|------------|-------------|--------------|------|-----------|-----------|-------------------------------------------------------------------------|
| CCG019690.1 | 861  | 95   | 283 | 4.74114377 | 11.49035113 | 1.277115838  | Up   | 0         | 0         | -                                                                       |
| CCG012568.1 | 709  | 99   | 283 | 6.00000526 | 13.95372684 | 1.217614827  | Up   | 1.42E-14  | 5.05E-14  | AAEL002934-PA OS=Aedes aegypti GN=AAEL002934 PE=4 SV=1                  |
| CCG002897.1 | 2375 | 115  | 283 | 2.08063978 | 4.165554664 | 1.001481396  | Up   | 6.99E-11  | 1.50E-10  | AAEL009154-PA OS=Aedes aegypti GN=AAEL009154 PE=4 SV=1                  |
| CCG004226.1 | 1551 | 949  | 283 | 26.2916042 | 6.378589508 | -2.04329283  | Down | 2.61E-117 | 1.42E-116 | Abc transporter OS=Culex quinquefasciatus GN=CpipJ_CPIJ007889 PE=3 SV=1 |
| CCG010332.1 | 897  | 38   | 284 | 1.8203455  | 11.06817236 | 2.60413281   | Up   | 4.26E-14  | 1.45E-13  | Methionine aminopeptidase OS=Aedes aegypti GN=AAEL013150 PE=3 SV=1      |
| CCG007189.1 | 1638 | 41   | 284 | 1.07555502 | 6.061142004 | 2.494508319  | Up   | 1.02E-13  | 3.19E-13  | AAEL004874-PA OS=Aedes aegypti GN=AAEL004874 PE=4 SV=1                  |
| CCG023026.1 | 375  | 42   | 284 | 4.81261028 | 26.47506828 | 2.459742901  | Up   | 7.66E-14  | 2.48E-13  | AAEL005729-PA OS=Aedes aegypti GN=HOT_AEDAE PE=4 SV=1                   |
| CCG012279.1 | 540  | 65   | 284 | 5.17228287 | 18.38546408 | 1.82969251   | Up   | 0         | 0         | AAEL011200-PA OS=Aedes aegypti GN=AAEL011200 PE=4 SV=1                  |
| CCG012272.1 | 810  | 66   | 284 | 3.50123763 | 12.25697605 | 1.807666204  | Up   | 0         | 0         | AAEL012610-PA OS=Aedes aegypti GN=AAEL012610 PE=2 SV=1                  |
| CCG024800.1 | 1056 | 77   | 284 | 3.13320982 | 9.401657768 | 1.585273783  | Up   | 0         | 0         | Uncharacterized protein OS=Anopheles darlingi GN=AND_03220 PE=4 SV=1    |
| CCG014690.1 | 978  | 86   | 284 | 3.77852472 | 10.15148323 | 1.425795569  | Up   | 0         | 0         | AAEL008636-PA OS=Aedes aegypti GN=AAEL008636 PE=4 SV=1                  |
| CCG020725.1 | 1027 | 96   | 284 | 4.0166451  | 9.667137881 | 1.267097823  | Up   | 0         | 0         | -                                                                       |
| CCG014594.1 | 2099 | 107  | 284 | 2.19045336 | 4.729943117 | 1.110593337  | Up   | 1.10E-12  | 2.69E-12  | -                                                                       |
| CCG007691.1 | 2732 | 522  | 284 | 8.21017623 | 3.634022915 | -1.175845673 | Down | 7.03E-30  | 2.96E-29  | AAEL012522-PA OS=Aedes aegypti GN=AAEL012522 PE=4 SV=1                  |
| CCG026430.1 | 801  | 524  | 284 | 28.1100386 | 12.39469489 | -1.181362678 | Down | 3.35E-30  | 1.41E-29  | AAEL005106-PA OS=Aedes aegypti GN=AAEL005106 PE=4 SV=1                  |
| CCG027317.1 | 2415 | 1262 | 284 | 22.4545777 | 4.111035447 | -2.449435872 | Down | 1.01E-194 | 6.02E-194 | AAEL010062-PA (Fragment) OS=Aedes aegypti GN=AAEL010062 PE=4 SV=1       |
| CCG001950.1 | 579  | 0    | 285 | 0.001      | 17.20744193 | 14.07074502  | Up   | 4.44E-16  | 1.66E-15  | AAEL008835-PA OS=Aedes aegypti GN=AAEL008835 PE=4 SV=1                  |

|             |      |      |     |            |             |              |      |           |           |                                                                                                   |
|-------------|------|------|-----|------------|-------------|--------------|------|-----------|-----------|---------------------------------------------------------------------------------------------------|
| CCG007532.1 | 1350 | 0    | 285 | 0.001      | 7.380080652 | 12.84942087  | Up   | 4.44E-16  | 1.63E-15  | Tubulin alpha-2 chain OS=Culex quinquefasciatus<br>GN=CpipJ_CPIJ004534 PE=3<br>SV=1               |
| CCG021444.1 | 1178 | 33   | 285 | 1.2037362  | 8.457647606 | 2.812737194  | Up   | 1.31E-13  | 4.01E-13  | Ribonuclease OS=Aedes aegypti<br>GN=AAEL003510 PE=3 SV=1                                          |
| CCG006768.1 | 1698 | 36   | 285 | 0.91101911 | 5.867555289 | 2.687206311  | Up   | 6.13E-14  | 2.03E-13  | AAEL003559-PA (Fragment)<br>OS=Aedes aegypti<br>GN=AAEL003559 PE=4 SV=1                           |
| CCG011163.1 | 1028 | 57   | 285 | 2.38256311 | 9.691740156 | 2.024241299  | Up   | 0         | 0         | -                                                                                                 |
| CCG011015.1 | 828  | 59   | 285 | 3.06185307 | 12.03274019 | 1.974488264  | Up   | 0         | 0         | AAEL012523-PA OS=Aedes<br>aegypti GN=AAEL012523 PE=4<br>SV=1                                      |
| CCG019235.1 | 3054 | 73   | 285 | 1.02710892 | 3.26231463  | 1.667306754  | Up   | 0         | 0         | Putative uncharacterized protein<br>OS=Culex quinquefasciatus<br>GN=CpipJ_CPIJ004892 PE=4<br>SV=1 |
| CCG006059.1 | 597  | 90   | 285 | 6.47784944 | 16.68862459 | 1.365278217  | Up   | 0         | 0         | Tryptophan 2,3-dioxygenase<br>OS=Culex quinquefasciatus<br>GN=CpipJ_CPIJ002864 PE=4<br>SV=1       |
| CCG022221.1 | 663  | 93   | 285 | 6.02742884 | 15.02731354 | 1.317972502  | Up   | 4.04E-14  | 1.38E-13  | AAEL014296-PA OS=Aedes<br>aegypti GN=AAEL014296 PE=4<br>SV=1                                      |
| CCG021541.1 | 2324 | 996  | 285 | 18.4156005 | 4.287052014 | -2.102870619 | Down | 1.11E-127 | 6.15E-127 | AAEL002946-PA OS=Aedes<br>aegypti GN=AAEL002946 PE=4<br>SV=1                                      |
| CCG022586.1 | 2202 | 1464 | 285 | 28.5684339 | 4.524572607 | -2.658568525 | Down | 6.45E-248 | 3.97E-247 | AAEL008658-PA OS=Aedes<br>aegypti GN=AAEL008658 PE=4<br>SV=1                                      |
| CCG011855.1 | 971  | 21   | 286 | 0.92931455 | 10.2966706  | 3.469867118  | Up   | 1.76E-10  | 3.72E-10  | AAEL014754-PA OS=Aedes<br>aegypti GN=AAEL014754 PE=3<br>SV=1                                      |
| CCG009281.1 | 1367 | 37   | 286 | 1.16304329 | 7.313875023 | 2.652731175  | Up   | 5.17E-14  | 1.74E-13  | AAEL006298-PA (Fragment)<br>OS=Aedes aegypti<br>GN=AAEL006298 PE=4 SV=1                           |
| CCG021268.1 | 4524 | 49   | 286 | 0.46541048 | 2.210006003 | 2.247474696  | Up   | 0         | 0         | AAEL005047-PA OS=Aedes<br>aegypti GN=AAEL005047 PE=4<br>SV=1                                      |
| CCG025910.1 | 1711 | 52   | 286 | 1.30591829 | 5.843405702 | 2.161744822  | Up   | 0         | 0         | AAEL004163-PA OS=Aedes<br>aegypti GN=AAEL004163 PE=4<br>SV=1                                      |
| CCG000313.1 | 455  | 71   | 286 | 6.70516738 | 21.97377397 | 1.712437421  | Up   | 0         | 0         | AGAP007614-PA OS=Anopheles<br>gambiae GN=AGAP007614 PE=4<br>SV=2                                  |



|             |       |      |     |            |             |              |      |           |           |                                                                            |
|-------------|-------|------|-----|------------|-------------|--------------|------|-----------|-----------|----------------------------------------------------------------------------|
| CCG008510.1 | 1239  | 80   | 286 | 2.77447843 | 8.069465018 | 1.540256446  | Up   | 0         | 0         | Aminomethyltransferase<br>OS=Aedes aegypti<br>GN=AAEL010276 PE=3 SV=1      |
| CCG013998.1 | 711   | 85   | 286 | 5.13702875 | 14.06197912 | 1.452793604  | Up   | 0         | 0         | AAEL003756-PA OS=Aedes<br>aegypti GN=AAEL003756 PE=4<br>SV=1               |
| CCG007114.1 | 1008  | 111  | 286 | 4.73178625 | 9.918717418 | 1.067768674  | Up   | 4.86E-12  | 1.11E-11  | AAEL005208-PA OS=Aedes<br>aegypti GN=AAEL005208 PE=2<br>SV=1               |
| CCG028590.1 | 1812  | 574  | 286 | 13.6118254 | 5.517697106 | -1.302722386 | Down | 3.72E-38  | 1.65E-37  | AAEL013140-PA OS=Aedes<br>aegypti GN=AAEL013140 PE=3<br>SV=1               |
| CCG021828.1 | 2963  | 1010 | 286 | 14.6471252 | 3.374305487 | -2.117955037 | Down | 1.22E-130 | 6.80E-130 | AAEL009795-PA OS=Aedes<br>aegypti GN=AAEL009795 PE=4<br>SV=1               |
| CCG018321.1 | 920   | 4    | 287 | 0.18682493 | 10.90546243 | 5.86722013   | Up   | 2.95E-05  | 5.04E-05  | AAEL003648-PA OS=Aedes<br>aegypti GN=AAEL003648 PE=4<br>SV=1               |
| CCG025436.1 | 1062  | 23   | 287 | 0.93060631 | 9.447293252 | 3.343658174  | Up   | 4.01E-11  | 8.68E-11  | AAEL008938-PA OS=Aedes<br>aegypti GN=AAEL008938 PE=4<br>SV=1               |
| CCG023686.1 | 702   | 35   | 287 | 2.14236569 | 14.29205902 | 2.737937114  | Up   | 6.39E-14  | 2.11E-13  | AAEL014295-PA OS=Aedes<br>aegypti GN=AAEL014295 PE=4<br>SV=1               |
| CCG005520.1 | 325   | 38   | 287 | 5.02415359 | 30.87084749 | 2.619292617  | Up   | 4.26E-14  | 1.45E-13  | -                                                                          |
| CCG021719.1 | 753   | 44   | 287 | 2.51084771 | 13.32407096 | 2.407788512  | Up   | 3.91E-14  | 1.34E-13  | Ribosome biogenesis protein<br>(Fragment) OS=Aedes albopictus<br>PE=2 SV=1 |
| CCG026046.1 | 714   | 45   | 287 | 2.70817655 | 14.05185635 | 2.375367034  | Up   | 0         | 0         | AAEL003362-PA OS=Aedes<br>aegypti GN=AAEL003362 PE=4<br>SV=1               |
| CCG005857.1 | 1608  | 63   | 287 | 1.68351572 | 6.239443678 | 1.889940207  | Up   | 0         | 0         | AAEL011904-PA OS=Aedes<br>aegypti GN=AAEL011904 PE=4<br>SV=1               |
| CCG001488.1 | 2175  | 76   | 287 | 1.50147119 | 4.612885257 | 1.619292617  | Up   | 0         | 0         | AAEL011911-PA OS=Aedes<br>aegypti GN=AAEL011911 PE=4<br>SV=1               |
| CCG026536.1 | 681   | 92   | 287 | 5.80501554 | 14.73278331 | 1.343658174  | Up   | 1.44E-14  | 5.11E-14  | Pyridoxamine-phosphate oxidase<br>OS=Aedes aegypti PE=2 SV=1               |
| CCG017344.1 | 1362  | 101  | 287 | 3.18644875 | 7.366391655 | 1.209008648  | Up   | 0         | 0         | AAEL006769-PA OS=Aedes<br>aegypti GN=AAEL006769 PE=3<br>SV=1               |
| CCG018843.1 | 23442 | 574  | 287 | 1.05215543 | 0.427993577 | -1.297686796 | Down | 6.18E-38  | 2.73E-37  | AAEL006808-PA OS=Aedes<br>aegypti GN=AAEL006808 PE=4<br>SV=1               |
| CCG023923.1 | 869   | 824  | 287 | 40.7446045 | 11.54548381 | -1.819280397 | Down | 1.76E-87  | 9.13E-87  | AAEL012644-PA OS=Aedes<br>aegypti GN=AAEL012644 PE=4<br>SV=1               |

|             |       |      |     |            |             |              |      |           |            |                                                                              |
|-------------|-------|------|-----|------------|-------------|--------------|------|-----------|------------|------------------------------------------------------------------------------|
| CCG013769.1 | 852   | 1    | 288 | 0.05043396 | 11.81688229 | 7.872238205  | Up   | 0.000587  | 0.00091865 | Putative salivary mucin OS=Aedes albopictus PE=2 SV=1                        |
| CCG021994.1 | 651   | 71   | 288 | 4.68640731 | 15.46541277 | 1.722491086  | Up   | 0         | 0          | Hypothetical conserved protein OS=Aedes aegypti PE=2 SV=1                    |
| CCG007647.1 | 1057  | 77   | 288 | 3.13024557 | 9.525055544 | 1.605451665  | Up   | 0         | 0          | III-proximal protein OS=Culex quinquefasciatus GN=CpipJ_CPIJ002301 PE=4 SV=1 |
| CCG024926.1 | 732   | 112  | 288 | 6.5746042  | 13.75407611 | 1.064883283  | Up   | 4.56E-12  | 1.05E-11   | AAEL000129-PA OS=Aedes aegypti GN=AAEL006129 PE=4 SV=1                       |
| CCG017501.1 | 2603  | 494  | 288 | 8.15484015 | 3.867838536 | -1.076129026 | Down | 8.72E-25  | 3.54E-24   | AAEL001543-PA OS=Aedes aegypti GN=AAEL001543 PE=4 SV=1                       |
| CCG021263.1 | 6165  | 572  | 288 | 3.98681074 | 1.633087382 | -1.287633132 | Down | 2.26E-37  | 9.95E-37   | AAEL007759-PA OS=Aedes aegypti GN=AAEL007759 PE=4 SV=1                       |
| CCG025354.1 | 1231  | 598  | 288 | 20.8740059 | 8.178703258 | -1.351763469 | Down | 6.33E-42  | 2.85E-41   | AAEL008001-PA OS=Aedes aegypti GN=AAEL008001 PE=4 SV=1                       |
| CCG011044.1 | 16092 | 1299 | 288 | 3.46866053 | 0.625651486 | -2.47094751  | Down | 1.89E-202 | 1.13E-201  | AAEL009637-PA OS=Aedes aegypti GN=CAT-B3 PE=2 SV=1                           |
| CCG024717.1 | 2278  | 56   | 289 | 1.05632359 | 4.435005262 | 2.069883964  | Up   | 0         | 0          | AAEL009383-PA OS=Aedes aegypti GN=AAEL009383 PE=4 SV=1                       |
| CCG014835.1 | 1197  | 57   | 289 | 2.04617784 | 8.44021887  | 2.044348872  | Up   | 0         | 0          | AAEL011703-PA OS=Aedes aegypti GN=AAEL011703 PE=4 SV=1                       |
| CCG022436.1 | 1644  | 64   | 289 | 1.67278772 | 6.145341841 | 1.877238886  | Up   | 0         | 0          | AAEL007446-PA OS=Aedes aegypti GN=AAEL007446 PE=4 SV=1                       |
| CCG006734.1 | 1623  | 96   | 289 | 2.54164789 | 6.224856431 | 1.292276386  | Up   | 0         | 0          | AAEL006356-PA OS=Aedes aegypti GN=AAEL006356 PE=4 SV=1                       |
| CCG008677.1 | 730   | 105  | 289 | 6.18057827 | 13.83964656 | 1.162993369  | Up   | 0         | 0          | AAEL013010-PA OS=Aedes aegypti GN=AAEL013010 PE=4 SV=1                       |
| CCG002155.1 | 747   | 50   | 290 | 2.87615359 | 13.5714863  | 2.238366104  | Up   | 0         | 0          | AAEL001934-PA OS=Aedes aegypti GN=AAEL001934 PE=4 SV=1                       |
| CCG021417.1 | 998   | 60   | 290 | 2.58335078 | 10.1582167  | 1.975331698  | Up   | 0         | 0          | AAEL010970-PA OS=Aedes aegypti GN=AAEL010970 PE=4 SV=1                       |
| CCG018348.1 | 190   | 72   | 290 | 16.2832679 | 53.35736981 | 1.712297292  | Up   | 0         | 0          | -                                                                            |
| CCG004960.1 | 519   | 497  | 290 | 41.1482815 | 19.53352652 | -1.074879748 | Down | 6.98E-25  | 2.83E-24   | AAEL010956-PA OS=Aedes aegypti GN=AAEL010956 PE=4 SV=1                       |

|             |      |      |     |            |             |              |      |          |          |                                                                                          |
|-------------|------|------|-----|------------|-------------|--------------|------|----------|----------|------------------------------------------------------------------------------------------|
| CCG014686.1 | 906  | 504  | 290 | 23.9036934 | 11.18973539 | -1.09505763  | Down | 6.14E-26 | 2.51E-25 | AAEL006568-PA OS=Aedes aegypti GN=AAEL006568 PE=3 SV=1                                   |
| CCG005370.1 | 827  | 21   | 291 | 1.0911299  | 12.30091722 | 3.494871124  | Up   | 1.76E-10 | 3.72E-10 | Alpha-tubulin (Fragment) OS=Cochliomyia hominivorax PE=2 SV=1                            |
| CCG020301.1 | 1236 | 38   | 291 | 1.32107598 | 8.230468075 | 2.639261033  | Up   | 4.26E-14 | 1.45E-13 | AAEL009454-PA OS=Aedes aegypti GN=AAEL009454 PE=4 SV=1                                   |
| CCG003088.1 | 1462 | 44   | 291 | 1.29320679 | 6.958179576 | 2.427756928  | Up   | 3.91E-14 | 1.34E-13 | AAEL005132-PA OS=Aedes aegypti GN=AAEL005132 PE=4 SV=1                                   |
| CCG003880.1 | 1065 | 51   | 291 | 2.0577056  | 9.55197985  | 2.214763205  | Up   | 0        | 0        | AAEL005019-PA OS=Aedes aegypti GN=AAEL005019 PE=4 SV=1                                   |
| CCG020406.1 | 6393 | 69   | 291 | 0.4637747  | 1.591249576 | 1.77866409   | Up   | 0        | 0        | AAEL014742-PA (Fragment) OS=Aedes aegypti GN=AAEL014742 PE=4 SV=1                        |
| CCG015900.1 | 1193 | 82   | 291 | 2.95349391 | 8.527123672 | 1.529636542  | Up   | 0        | 0        | AAEL006694-PA OS=Aedes aegypti GN=AAEL006694 PE=4 SV=1                                   |
| CCG004640.1 | 1786 | 95   | 291 | 2.28562418 | 5.695889441 | 1.317332938  | Up   | 0        | 0        | Putative uncharacterized protein OS=Culex quinquefasciatus GN=CpipJ_CPIJ009123 PE=4 SV=1 |
| CCG019786.1 | 826  | 1749 | 291 | 90.9855519 | 12.31580937 | -2.885126027 | Down | 0        | 0        | AAEL014889-PA (Fragment) OS=Aedes aegypti GN=AAEL014889 PE=2 SV=1                        |
| CCG007565.1 | 312  | 8115 | 291 | 1117.62627 | 32.60531584 | -5.099186833 | Down | 0        | 0        | AAEL001082-PA OS=Aedes aegypti GN=AAEL001082 PE=4 SV=1                                   |
| CCG005940.1 | 579  | 0    | 292 | 0.001      | 17.63008086 | 14.10575147  | Up   | 4.44E-16 | 1.66E-15 | AAEL005005-PA OS=Aedes aegypti GN=AAEL005005 PE=4 SV=1                                   |
| CCG022015.1 | 2431 | 13   | 292 | 0.22978468 | 4.19901967  | 4.191698045  | Up   | 6.34E-08 | 1.23E-07 | -                                                                                        |
| CCG000950.1 | 3357 | 35   | 292 | 0.4480014  | 3.04075568  | 2.762854746  | Up   | 6.39E-14 | 2.10E-13 | AAEL008178-PA OS=Aedes aegypti GN=AAEL008178 PE=3 SV=1                                   |
| CCG016258.1 | 889  | 482  | 292 | 23.2974264 | 11.48235862 | -1.020751574 | Down | 2.45E-22 | 9.74E-22 | AAEL011967-PA OS=Aedes aegypti GN=AAEL011967 PE=4 SV=1                                   |
| CCG012143.1 | 1842 | 745  | 292 | 17.3791815 | 5.541702941 | -1.648958853 | Down | 3.62E-69 | 1.79E-68 | AAEL005285-PA (Fragment) OS=Aedes aegypti GN=AAEL005285 PE=4 SV=1                        |

|             |      |      |     |            |             |              |      |           |            |                                                                          |
|-------------|------|------|-----|------------|-------------|--------------|------|-----------|------------|--------------------------------------------------------------------------|
| CCG023583.1 | 2739 | 753  | 292 | 11.8131472 | 3.726840751 | -1.664368292 | Down | 8.18E-71  | 4.06E-70   | AAEL012655-PA OS=Aedes aegypti GN=AAEL012655 PE=3 SV=1                   |
| CCG025651.1 | 1317 | 820  | 292 | 26.7541248 | 7.750810036 | -1.787342337 | Down | 5.59E-85  | 2.87E-84   | AAEL002397-PA OS=Aedes aegypti GN=AAEL002397 PE=4 SV=1                   |
| CCG005588.1 | 1017 | 67   | 293 | 2.83084781 | 10.0715586  | 1.830980868  | Up   | 0         | 0          | AAEL012014-PA OS=Aedes aegypti GN=AAEL012014 PE=3 SV=1                   |
| CCG005769.1 | 1332 | 540  | 293 | 17.4201627 | 7.689771092 | -1.179745539 | Down | 5.22E-31  | 2.21E-30   | AAEL010988-PA (Fragment) OS=Aedes aegypti GN=AAEL010988 PE=4 SV=1        |
| CCG020820.1 | 1699 | 556  | 293 | 14.0619026 | 6.028708119 | -1.221871014 | Down | 1.28E-33  | 5.50E-33   | -                                                                        |
| CCG017107.1 | 1901 | 1536 | 293 | 34.7193647 | 5.388098419 | -2.687892442 | Down | 3.23E-263 | 2.00E-262  | AAEL007997-PA OS=Aedes aegypti GN=AAEL007997 PE=4 SV=1                   |
| CCG027863.1 | 1347 | 19   | 294 | 0.60610613 | 7.630091589 | 3.654058035  | Up   | 7.73E-10  | 1.60E-09   | AAEL012388-PA OS=Aedes aegypti GN=AAEL012388 PE=4 SV=1                   |
| CCG026300.1 | 1500 | 28   | 294 | 0.80210171 | 6.851822247 | 3.094630627  | Up   | 1.17E-12  | 2.85E-12   | AAEL013312-PA (Fragment) OS=Aedes aegypti GN=AAEL013312 PE=4 SV=1        |
| CCG024512.1 | 2133 | 48   | 294 | 0.96697012 | 4.818440399 | 2.317023048  | Up   | 5.35E-14  | 1.79E-13   | AAEL004910-PA OS=Aedes aegypti GN=AAEL004910 PE=4 SV=1                   |
| CCG004212.1 | 1158 | 52   | 294 | 1.9295563  | 8.875417419 | 2.201545831  | Up   | 0         | 0          | AAEL011567-PA OS=Aedes aegypti GN=AAEL011567 PE=3 SV=1                   |
| CCG027333.1 | 631  | 67   | 294 | 4.56255502 | 16.28800851 | 1.835896358  | Up   | 0         | 0          | AAEL012135-PB OS=Aedes aegypti GN=GALE2 PE=4 SV=1                        |
| CCG015086.1 | 1085 | 73   | 294 | 2.89105127 | 9.472565319 | 1.71216099   | Up   | 0         | 0          | mediator complex OS=Culex quinquefasciatus GN=CpipJ_CPIJ013675 PE=4 SV=1 |
| CCG014078.1 | 781  | 633  | 294 | 34.8269424 | 13.15970982 | -1.404076141 | Down | 7.75E-47  | 3.57E-46   | -                                                                        |
| CCG000121.1 | 1049 | 660  | 294 | 27.0352954 | 9.79764859  | -1.464336666 | Down | 7.35E-52  | 3.46E-51   | AAEL006518-PA OS=Aedes aegypti GN=AAEL006518 PE=4 SV=1                   |
| CCG019298.1 | 1633 | 1137 | 294 | 29.9183027 | 6.293774263 | -2.24903099  | Down | 2.24E-158 | 1.29E-157  | AAEL001816-PA OS=Aedes aegypti GN=AAEL001816 PE=3 SV=1                   |
| CCG026452.1 | 450  | 0    | 295 | 0.001      | 22.91709255 | 14.4841364   | Up   | 4.44E-16  | 1.64E-15   | AAEL003185-PA OS=Aedes aegypti GN=AAEL003185 PE=4 SV=1                   |
| CCG027500.1 | 1100 | 1    | 295 | 0.0390634  | 9.375174225 | 7.906884348  | Up   | 0.000587  | 0.00091683 | AAEL002875-PA OS=Aedes aegypti GN=AAEL002875 PE=4 SV=1                   |

|             |      |      |     |            |             |              |      |           |           |                                                                                          |
|-------------|------|------|-----|------------|-------------|--------------|------|-----------|-----------|------------------------------------------------------------------------------------------|
| CCG008913.1 | 1169 | 48   | 295 | 1.76436891 | 8.821806371 | 2.321921847  | Up   | 5.35E-14  | 1.79E-13  | AAEL011748-PA OS=Aedes aegypti GN=AAEL011748 PE=2 SV=1                                   |
| CCG025973.1 | 663  | 74   | 295 | 4.79601864 | 15.5545877  | 1.697430982  | Up   | 0         | 0         | AAEL003817-PA OS=Aedes aegypti GN=AAEL003817 PE=2 SV=1                                   |
| CCG020224.1 | 1596 | 92   | 295 | 2.47695212 | 6.461586246 | 1.383322392  | Up   | 1.44E-14  | 5.12E-14  | -                                                                                        |
| CCG014336.1 | 1248 | 759  | 295 | 26.1330357 | 8.263374718 | -1.661071727 | Down | 3.65E-71  | 1.81E-70  | AAEL011740-PA OS=Aedes aegypti GN=AAEL011740 PE=4 SV=1                                   |
| CCG013856.1 | 1046 | 14   | 296 | 0.57512073 | 9.89259075  | 4.104411647  | Up   | 3.07E-08  | 6.01E-08  | AAEL006787-PA OS=Aedes aegypti GN=AAEL006787 PE=4 SV=1                                   |
| CCG017159.1 | 3003 | 19   | 296 | 0.27186978 | 3.445770871 | 3.663839056  | Up   | 7.73E-10  | 1.60E-09  | Putative uncharacterized protein OS=Culex quinquefasciatus GN=CpipJ_CPIJ001516 PE=4 SV=1 |
| CCG019385.1 | 2352 | 21   | 296 | 0.38365834 | 4.399511022 | 3.519449147  | Up   | 1.76E-10  | 3.72E-10  | AAEL007753-PA OS=Aedes aegypti GN=AAEL007753 PE=4 SV=1                                   |
| CCG012534.1 | 351  | 89   | 296 | 10.8954598 | 29.48048412 | 1.436033138  | Up   | 0         | 0         | AAEL012819-PA OS=Aedes aegypti GN=AAEL012819 PE=4 SV=1                                   |
| CCG014699.1 | 861  | 974  | 296 | 48.6092004 | 12.01817645 | -2.016011393 | Down | 2.94E-118 | 1.61E-117 | AAEL010338-PA OS=Aedes aegypti GN=AAEL010338 PE=4 SV=1                                   |
| CCG008602.1 | 1924 | 1102 | 296 | 24.6115632 | 5.378196427 | -2.194141939 | Down | 6.81E-149 | 3.86E-148 | AAEL012613-PA OS=Aedes aegypti GN=AAEL012613 PE=4 SV=1                                   |
| CCG005828.1 | 1299 | 5    | 297 | 0.16539544 | 7.992769978 | 5.59470423   | Up   | 1.59E-05  | 2.76E-05  | AAEL006827-PA OS=Aedes aegypti GN=CYP12F8 PE=3 SV=1                                      |
| CCG020736.1 | 1449 | 14   | 297 | 0.41516652 | 7.165361078 | 4.109277403  | Up   | 3.07E-08  | 6.01E-08  | Putative uncharacterized protein OS=Culex quinquefasciatus GN=CpipJ_CPIJ014034 PE=4 SV=1 |
| CCG023647.1 | 1992 | 39   | 297 | 0.84127492 | 5.212152712 | 2.631230106  | Up   | 7.33E-14  | 2.38E-13  | AAEL001468-PA OS=Aedes aegypti GN=AAEL001468 PE=4 SV=1                                   |
| CCG027065.1 | 1392 | 40   | 297 | 1.23476249 | 7.45877026  | 2.59470423   | Up   | 6.86E-14  | 2.24E-13  | AAEL003178-PA OS=Aedes aegypti GN=AAEL003178 PE=4 SV=1                                   |
| CCG012788.3 | 2118 | 92   | 297 | 1.86648517 | 4.902081304 | 1.393070369  | Up   | 1.44E-14  | 5.11E-14  | AAEL006023-PA OS=Aedes aegypti GN=AAEL006023 PE=4 SV=1                                   |
| CCG009493.1 | 885  | 97   | 297 | 4.70967713 | 11.73176068 | 1.316719482  | Up   | 3.62E-14  | 1.25E-13  | AAEL001155-PA OS=Aedes aegypti GN=AAEL001155 PE=4 SV=1                                   |
| CCG018157.1 | 489  | 102  | 297 | 8.96301213 | 21.23232761 | 1.244206983  | Up   | 0         | 0         | AAEL003029-PA OS=Aedes aegypti GN=AAEL003029 PE=4 SV=1                                   |

|             |      |      |     |            |             |              |      |          |          |                                                                                                   |
|-------------|------|------|-----|------------|-------------|--------------|------|----------|----------|---------------------------------------------------------------------------------------------------|
| CCG000203.1 | 2208 | 116  | 297 | 2.25746794 | 4.702268207 | 1.058651329  | Up   | 2.84E-12 | 6.67E-12 | Zinc finger protein SZZA<br>OS=Culex quinquefasciatus<br>GN=CpipJ_CPIJ001554 PE=4<br>SV=1         |
| CCG019367.2 | 2304 | 693  | 297 | 12.9244905 | 4.506340365 | -1.520079218 | Down | 2.13E-57 | 1.02E-56 | AAEL005181-PA OS=Aedes<br>aegypti GN=AAEL005181 PE=4<br>SV=1                                      |
| CCG023575.1 | 477  | 4751 | 297 | 427.985763 | 21.76647422 | -4.297383167 | Down | 0        | 0        | AAEL005768-PA OS=Aedes<br>aegypti GN=AAEL005768 PE=4<br>SV=1                                      |
| CCG001678.1 | 1279 | 8    | 298 | 0.26877082 | 8.14508716  | 4.921481724  | Up   | 2.19E-06 | 3.97E-06 | Putative uncharacterized protein<br>OS=Culex quinquefasciatus<br>GN=CpipJ_CPIJ014034 PE=4<br>SV=1 |
| CCG014170.1 | 1539 | 17   | 298 | 0.47464944 | 6.769049044 | 3.834018883  | Up   | 3.39E-09 | 6.89E-09 | AAEL002852-PA OS=Aedes<br>aegypti GN=AAEL002852 PE=4<br>SV=1                                      |
| CCG010770.1 | 246  | 30   | 298 | 5.24021154 | 42.34783121 | 3.014591129  | Up   | 3.71E-13 | 9.94E-13 | AAEL007539-PA OS=Aedes<br>aegypti GN=AAEL007539 PE=4<br>SV=1                                      |
| CCG011328.1 | 1143 | 37   | 298 | 1.39097129 | 9.114231389 | 2.712028359  | Up   | 5.17E-14 | 1.74E-13 | Flap endonuclease 1<br>OS=Anopheles darlingi GN=Fen1<br>PE=3 SV=1                                 |
| CCG001300.1 | 1206 | 79   | 298 | 2.81476703 | 8.638114824 | 1.617700976  | Up   | 0        | 0        | AAEL006110-PA (Fragment)<br>OS=Aedes aegypti<br>GN=AAEL006110 PE=4 SV=1                           |
| CCG007708.1 | 3093 | 121  | 298 | 1.68100158 | 3.368110727 | 1.002618487  | Up   | 2.10E-11 | 4.59E-11 | Uncharacterized protein<br>OS=Anopheles darlingi<br>GN=AND_16340 PE=4 SV=1                        |
| CCG027596.1 | 1031 | 624  | 298 | 26.0069005 | 10.10433218 | -1.363920495 | Down | 2.94E-44 | 1.34E-43 | AAEL013871-PA OS=Aedes<br>aegypti GN=AAEL013871 PE=4<br>SV=1                                      |
| CCG022105.1 | 3342 | 718  | 298 | 9.23167847 | 3.117165314 | -1.56635831  | Down | 5.03E-62 | 2.44E-61 | AAEL012475-PA (Fragment)<br>OS=Aedes aegypti<br>GN=AAEL012475 PE=4 SV=1                           |
| CCG000417.1 | 1131 | 19   | 299 | 0.72186115 | 9.241843285 | 3.678387365  | Up   | 7.73E-10 | 1.60E-09 | AAEL003922-PA OS=Aedes<br>aegypti GN=AAEL003922 PE=4<br>SV=1                                      |
| CCG007091.1 | 1083 | 21   | 299 | 0.83320815 | 9.651454067 | 3.533997455  | Up   | 1.76E-10 | 3.72E-10 | Arginine N-methyltransferase 1<br>OS=Culex quinquefasciatus<br>GN=CpipJ_CPIJ003726 PE=4<br>SV=1   |
| CCG026516.1 | 1659 | 45   | 299 | 1.16554434 | 6.30049714  | 2.434461782  | Up   | 0        | 0        | AAEL010013-PA OS=Aedes<br>aegypti GN=AAEL010013 PE=4<br>SV=1                                      |

|             |      |     |     |            |             |              |      |          |          |                                                                                          |
|-------------|------|-----|-----|------------|-------------|--------------|------|----------|----------|------------------------------------------------------------------------------------------|
| CCG022332.1 | 822  | 62  | 299 | 3.24102621 | 12.71596686 | 1.972118568  | Up   | 0        | 0        | AAEL011065-PA OS=Aedes aegypti GN=AAEL011065 PE=4 SV=1                                   |
| CCG004641.1 | 1923 | 66  | 299 | 1.47478028 | 5.435530294 | 1.881920759  | Up   | 0        | 0        | AAEL007982-PA OS=Aedes aegypti GN=AAEL007982 PE=4 SV=1                                   |
| CCG015382.1 | 678  | 679 | 299 | 43.0331118 | 15.41670318 | -1.480952886 | Down | 3.47E-54 | 1.64E-53 | AAEL001306-PA OS=Aedes aegypti GN=AAEL001306 PE=4 SV=1                                   |
| CCG009651.2 | 1278 | 18  | 300 | 0.60520753 | 8.206168256 | 3.761206893  | Up   | 1.62E-09 | 3.32E-09 | Uncharacterized protein OS=Anopheles darlingi GN=AND_15689 PE=4 SV=1                     |
| CCG023156.1 | 936  | 22  | 300 | 1.00997239 | 11.20457589 | 3.471700276  | Up   | 8.38E-11 | 1.80E-10 | AAEL008124-PA OS=Aedes aegypti GN=AAEL008124 PE=4 SV=1                                   |
| CCG012795.1 | 1398 | 42  | 300 | 1.29093623 | 7.501776131 | 2.538814472  | Up   | 7.66E-14 | 2.47E-13 | AAEL010332-PA OS=Aedes aegypti GN=AAEL010332 PE=4 SV=1                                   |
| CCG021883.1 | 1219 | 45  | 300 | 1.58624943 | 8.603349493 | 2.439278798  | Up   | 0        | 0        | AAEL012240-PA (Fragment) OS=Aedes aegypti GN=AAEL012240 PE=4 SV=1                        |
| CCG026998.1 | 1695 | 52  | 300 | 1.31824555 | 6.187305623 | 2.230692176  | Up   | 0        | 0        | AAEL010498-PA OS=Aedes aegypti GN=AAEL010498 PE=4 SV=1                                   |
| CCG010166.1 | 1075 | 54  | 300 | 2.15847969 | 9.755798169 | 2.176244392  | Up   | 0        | 0        | AAEL014712-PA OS=Aedes aegypti GN=AAEL014712 PE=4 SV=1                                   |
| CCG025856.1 | 399  | 57  | 300 | 6.13853352 | 26.28441863 | 2.09824188   | Up   | 0        | 0        | Putative uncharacterized protein OS=Culex quinquefasciatus GN=CpipJ_CPIJ001479 PE=4 SV=1 |
| CCG022804.1 | 1083 | 62  | 300 | 2.45994787 | 9.683733178 | 1.976935584  | Up   | 0        | 0        | AAEL006311-PA OS=Aedes aegypti GN=AAEL006311 PE=4 SV=1                                   |
| CCG017046.2 | 1011 | 73  | 300 | 3.10266135 | 10.3733759  | 1.741307335  | Up   | 0        | 0        | AAEL008794-PA OS=Aedes aegypti GN=AAEL008794 PE=4 SV=1                                   |
| CCG025816.1 | 1905 | 78  | 300 | 1.75939071 | 5.505240437 | 1.645729675  | Up   | 0        | 0        | AAEL012156-PA OS=Aedes aegypti GN=AAEL012156 PE=4 SV=1                                   |
| CCG003101.1 | 726  | 87  | 300 | 5.14926572 | 14.44556891 | 1.488188398  | Up   | 0        | 0        | AAEL002135-PA OS=Aedes aegypti GN=AAEL002135 PE=4 SV=1                                   |
| CCG026069.1 | 1270 | 88  | 300 | 2.97743043 | 8.257860655 | 1.471700276  | Up   | 2.93E-14 | 1.02E-13 | AAEL005475-PA OS=Aedes aegypti GN=AAEL005475 PE=4 SV=1                                   |
| CCG013716.1 | 1035 | 18  | 301 | 0.74729973 | 10.16660996 | 3.766007879  | Up   | 1.62E-09 | 3.33E-09 | AAEL006971-PA OS=Aedes aegypti GN=AAEL006971 PE=4 SV=1                                   |

|             |      |     |     |            |             |              |      |           |           |                                                                                                                                                                              |
|-------------|------|-----|-----|------------|-------------|--------------|------|-----------|-----------|------------------------------------------------------------------------------------------------------------------------------------------------------------------------------|
| CCG009352.1 | 774  | 21  | 301 | 1.16584551 | 13.59488541 | 3.543615458  | Up   | 1.76E-10  | 3.73E-10  | AAEL012675-PA OS=Aedes aegypti GN=AAEL012675 PE=4 SV=1                                                                                                                       |
| CCG011152.1 | 2745 | 39  | 301 | 0.61049896 | 3.833311952 | 2.650530662  | Up   | 7.33E-14  | 2.38E-13  | AAEL006631-PA OS=Aedes aegypti GN=AAEL006631 PE=4 SV=1                                                                                                                       |
| CCG023413.1 | 2541 | 46  | 301 | 0.77788579 | 4.141063089 | 2.412370925  | Up   | 3.40E-14  | 1.18E-13  | AAEL002994-PA OS=Aedes aegypti GN=AAEL002994 PE=4 SV=1                                                                                                                       |
| CCG004476.1 | 2381 | 48  | 301 | 0.86625252 | 4.419336963 | 2.35097038   | Up   | 5.35E-14  | 1.79E-13  | AAEL012727-PA OS=Aedes aegypti GN=AAEL012727 PE=4 SV=1                                                                                                                       |
| CCG022654.1 | 1301 | 55  | 301 | 1.81655296 | 8.087964111 | 2.154573167  | Up   | 0         | 0         | AAEL008602-PA OS=Aedes aegypti GN=AAEL008602 PE=4 SV=1                                                                                                                       |
| CCG026284.1 | 1640 | 66  | 301 | 1.72926981 | 6.416122749 | 1.891538761  | Up   | 0         | 0         | AAEL009246-PA OS=Aedes aegypti GN=AAEL009246 PE=3 SV=1                                                                                                                       |
| CCG003589.1 | 714  | 71  | 301 | 4.27290078 | 14.73731276 | 1.786185761  | Up   | 0         | 0         | AAEL006221-PA OS=Aedes aegypti GN=AAEL006221 PE=4 SV=1                                                                                                                       |
| CCG019393.1 | 702  | 85  | 301 | 5.20288809 | 14.98923263 | 1.526541944  | Up   | 0         | 0         | AAEL007351-PA OS=Aedes aegypti GN=AAEL007351 PE=4 SV=1                                                                                                                       |
| CCG021749.1 | 669  | 105 | 301 | 6.74412875 | 15.72861182 | 1.221687363  | Up   | 0         | 0         | AAEL002371-PA OS=Aedes aegypti GN=AAEL002371 PE=4 SV=1                                                                                                                       |
| CCG004909.1 | 456  | 664 | 301 | 62.5699644 | 23.07552919 | -1.439106551 | Down | 7.44E-51  | 3.48E-50  | AAEL005150-PA OS=Aedes aegypti GN=AAEL005150 PE=4 SV=1                                                                                                                       |
| CCG011433.1 | 2533 | 725 | 301 | 12.2988778 | 4.154141851 | -1.565904304 | Down | 1.38E-62  | 6.71E-62  | LINE-1 retrotransposon-like element, putative (Fragment) OS=Aspergillus flavus (strain ATCC 200026 / FGSC A1120 / NRRL 3357 / JCM 12722 / SRRC 167) GN=AFLA_063980 PE=4 SV=1 |
| CCG018264.1 | 3825 | 814 | 301 | 9.14440888 | 2.750965048 | -1.732952104 | Down | 7.62E-81  | 3.88E-80  | AAEL009195-PA OS=Aedes aegypti GN=AAEL009195 PE=4 SV=1                                                                                                                       |
| CCG025048.1 | 558  | 100 | 302 | 7.70066929 | 18.92007094 | 1.296861753  | Up   | 0         | 0         | AAEL013472-PA OS=Aedes aegypti GN=AAEL013472 PE=4 SV=1                                                                                                                       |
| CCG024035.1 | 823  | 595 | 302 | 31.065604  | 12.82794603 | -1.276027915 | Down | 2.78E-38  | 1.23E-37  | AAEL005666-PA OS=Aedes aegypti GN=AAEL005666 PE=4 SV=1                                                                                                                       |
| CCG022568.1 | 1596 | 916 | 302 | 24.6618276 | 6.614912021 | -1.898485845 | Down | 8.29E-103 | 4.41E-102 | AAEL000311-PA OS=Aedes aegypti GN=AAEL000311 PE=4 SV=1                                                                                                                       |



|             |      |      |     |            |             |              |      |           |           |                                                                                                   |
|-------------|------|------|-----|------------|-------------|--------------|------|-----------|-----------|---------------------------------------------------------------------------------------------------|
| CCG027334.1 | 1538 | 1117 | 302 | 31.2075381 | 6.864369041 | -2.184695527 | Down | 4.46E-150 | 2.53E-149 | AGAP000380-PA OS=Anopheles gambiae GN=AgaP_AGAP000380 PE=3 SV=5                                   |
| CCG022384.1 | 1686 | 1709 | 302 | 43.5559172 | 6.261802838 | -2.798218739 | Down | 6.00E-306 | 3.80E-305 | AAEL011831-PA OS=Aedes aegypti GN=AAEL011831 PE=4 SV=1                                            |
| CCG015626.1 | 1522 | 32   | 303 | 0.90343726 | 6.959499252 | 2.945487187  | Up   | 1.77E-13  | 5.17E-13  | AAEL007864-PA OS=Aedes aegypti GN=AAEL007864 PE=4 SV=1                                            |
| CCG004429.1 | 1281 | 94   | 303 | 3.15312651 | 8.268819564 | 1.390898336  | Up   | 0         | 0         | AAEL001600-PA OS=Aedes aegypti GN=AAEL001600 PE=4 SV=1                                            |
| CCG000944.1 | 4764 | 2836 | 303 | 25.5798    | 2.223416848 | -3.52415463  | Down | 0         | 0         | AAEL008160-PA OS=Aedes aegypti GN=AAEL008160 PE=4 SV=1                                            |
| CCG014859.1 | 456  | 7    | 304 | 0.65962312 | 23.30551785 | 5.142885795  | Up   | 4.31E-06  | 7.70E-06  | AAEL008463-PA OS=Aedes aegypti GN=AAEL008463 PE=3 SV=1                                            |
| CCG015554.1 | 1752 | 14   | 304 | 0.34336546 | 6.065819714 | 4.142885795  | Up   | 3.07E-08  | 6.00E-08  | AAEL005452-PA OS=Aedes aegypti GN=AAEL005452 PE=4 SV=1                                            |
| CCG023580.1 | 939  | 33   | 304 | 1.51011847 | 11.31769557 | 2.905846598  | Up   | 1.31E-13  | 4.00E-13  | AAEL006853-PA OS=Aedes aegypti GN=AAEL006853 PE=4 SV=1                                            |
| CCG025562.2 | 974  | 48   | 304 | 2.11760499 | 10.9110022  | 2.365278217  | Up   | 5.35E-14  | 1.79E-13  | AAEL012747-PA OS=Aedes aegypti GN=AAEL012747 PE=4 SV=1                                            |
| CCG009130.1 | 639  | 48   | 304 | 3.22777349 | 16.63116767 | 2.365278217  | Up   | 5.35E-14  | 1.80E-13  | -                                                                                                 |
| CCG017116.1 | 1356 | 64   | 304 | 2.02807007 | 7.83725379  | 1.950240717  | Up   | 0         | 0         | AAEL000477-PA OS=Aedes aegypti GN=AAEL000477 PE=4 SV=1                                            |
| CCG017838.1 | 699  | 65   | 304 | 3.99575501 | 15.20359963 | 1.927872904  | Up   | 0         | 0         | NAD(P)+H <sub>2</sub> O-hydrate epimerase OS=Culex quinquefasciatus GN=CpipJ_CPIJ004022 PE=3 SV=1 |
| CCG028451.1 | 1636 | 88   | 304 | 2.31133047 | 6.49591451  | 1.490809099  | Up   | 2.93E-14  | 1.02E-13  | AAEL008648-PA OS=Aedes aegypti GN=AAEL008648 PE=4 SV=1                                            |
| CCG011240.1 | 1713 | 520  | 304 | 13.0439358 | 6.203920688 | -1.072127096 | Down | 7.40E-26  | 3.03E-25  | AAEL008596-PA OS=Aedes aegypti GN=SPZ3A PE=4 SV=1                                                 |
| CCG019696.1 | 685  | 2081 | 304 | 130.540172 | 15.51433013 | -3.072820532 | Down | 0         | 0         | AAEL006829-PA OS=Aedes aegypti GN=AAEL006829 PE=4 SV=1                                            |
| CCG014945.1 | 477  | 2133 | 304 | 192.147681 | 22.27948876 | -3.108427533 | Down | 0         | 0         | AAEL003662-PA OS=Aedes aegypti GN=AAEL003662 PE=4 SV=1                                            |
| CCG015046.1 | 597  | 2312 | 304 | 166.408754 | 17.80119956 | -3.224684965 | Down | 0         | 0         | AAEL011070-PA OS=Aedes aegypti GN=CTLGA3 PE=2 SV=1                                                |

|             |      |     |     |            |             |              |      |          |          |                                                                                          |
|-------------|------|-----|-----|------------|-------------|--------------|------|----------|----------|------------------------------------------------------------------------------------------|
| CCG007987.1 | 1056 | 105 | 305 | 4.27255884 | 10.09685077 | 1.240733119  | Up   | 0        | 0        | AAEL004974-PA OS=Aedes aegypti GN=AAEL004974 PE=4 SV=1                                   |
| CCG024908.1 | 2271 | 771 | 305 | 14.5881398 | 4.694968919 | -1.635608414 | Down | 1.06E-70 | 5.26E-70 | Putative uncharacterized protein OS=Culex quinquefasciatus GN=CpipJ_CPIJ011195 PE=4 SV=1 |
| CCG015867.1 | 1667 | 0   | 306 | 0.001      | 6.417056204 | 12.6476959   | Up   | 4.44E-16 | 1.64E-15 | AAEL000123-PA OS=Aedes aegypti GN=AAEL006123 PE=3 SV=1                                   |
| CCG010399.1 | 957  | 16  | 306 | 0.71840727 | 11.1778816  | 3.959701047  | Up   | 7.09E-09 | 1.42E-08 | AAEL011648-PA OS=Aedes aegypti GN=AAEL011648 PE=3 SV=1                                   |
| CCG002035.1 | 1097 | 74  | 306 | 2.8985965  | 9.751351588 | 1.750247681  | Up   | 0        | 0        | AAEL001322-PA OS=Aedes aegypti GN=AAEL001322 PE=4 SV=1                                   |
| CCG025414.1 | 2185 | 79  | 306 | 1.55359681 | 4.895758669 | 1.655920298  | Up   | 0        | 0        | Putative uncharacterized protein OS=Culex quinquefasciatus GN=CpipJ_CPIJ009399 PE=4 SV=1 |
| CCG022646.1 | 2787 | 104 | 306 | 1.60346337 | 3.838260744 | 1.259261328  | Up   | 0        | 0        | AAEL006397-PA (Fragment) OS=Aedes aegypti GN=AAEL006397 PE=4 SV=1                        |
| CCG015343.1 | 1983 | 724 | 306 | 15.6883953 | 5.394469336 | -1.540144841 | Down | 4.97E-61 | 2.41E-60 | AAEL003316-PA OS=Aedes aegypti GN=AAEL003316 PE=4 SV=1                                   |
| CCG023257.1 | 399  | 74  | 307 | 7.96932421 | 26.89772173 | 1.754954684  | Up   | 0        | 0        | AAEL012078-PA OS=Aedes aegypti GN=AAEL012078 PE=4 SV=1                                   |
| CCG022582.1 | 855  | 76  | 307 | 3.81953197 | 12.55227014 | 1.716480536  | Up   | 0        | 0        | AAEL006915-PA OS=Aedes aegypti GN=AAEL006915 PE=4 SV=1                                   |
| CCG021448.1 | 1908 | 76  | 307 | 1.71158272 | 5.624838034 | 1.716480536  | Up   | 0        | 0        | AAEL003546-PA OS=Aedes aegypti GN=AAEL003546 PE=4 SV=1                                   |
| CCG014515.1 | 1202 | 95  | 307 | 3.39611047 | 8.928611455 | 1.394552441  | Up   | 0        | 0        | AAEL014651-PA OS=Aedes aegypti GN=AAEL014651 PE=4 SV=1                                   |
| CCG008606.1 | 3660 | 98  | 307 | 1.15055574 | 2.932292615 | 1.349698205  | Up   | 0        | 0        | Putative uncharacterized protein OS=Drosophila simulans GN=pol PE=4 SV=1                 |
| CCG010178.1 | 1376 | 103 | 307 | 3.21648449 | 7.79955739  | 1.277907522  | Up   | 0        | 0        | AAEL006463-PA OS=Aedes aegypti GN=AAEL006463 PE=4 SV=1                                   |
| CCG000515.1 | 2397 | 7   | 308 | 0.12548525 | 4.491927095 | 5.161744822  | Up   | 4.31E-06 | 7.70E-06 | AAEL008530-PA OS=Aedes aegypti GN=AAEL008530 PE=4 SV=1                                   |

|             |      |     |     |            |             |              |      |          |            |                                                                       |
|-------------|------|-----|-----|------------|-------------|--------------|------|----------|------------|-----------------------------------------------------------------------|
| CCG007690.1 | 1752 | 27  | 308 | 0.66220481 | 6.145633131 | 3.214212242  | Up   | 2.28E-12 | 5.40E-12   | AAEL001426-PA OS=Aedes aegypti GN=AAEL001426 PE=4 SV=1                |
| CCG010823.1 | 504  | 33  | 308 | 2.81349453 | 21.36339136 | 2.924705625  | Up   | 1.31E-13 | 4.01E-13   | AAEL0008801-PA OS=Aedes aegypti GN=AAEL008801 PE=4 SV=1               |
| CCG010311.1 | 501  | 40  | 308 | 3.43071733 | 21.49131586 | 2.64717165   | Up   | 6.86E-14 | 2.25E-13   | AAEL0007250-PA OS=Aedes aegypti GN=AAEL007250 PE=4 SV=1               |
| CCG022069.1 | 1311 | 75  | 308 | 2.4582228  | 8.212928487 | 1.740281054  | Up   | 0        | 0          | AAEL010524-PA OS=Aedes aegypti GN=AAEL010524 PE=4 SV=1                |
| CCG015767.2 | 1944 | 114 | 308 | 2.51983012 | 5.538657019 | 1.13620973   | Up   | 1.33E-13 | 4.02E-13   | AGAP008245-PA (Fragment) OS=Anopheles gambiae GN=AGAP008245 PE=4 SV=3 |
| CCG025483.1 | 1746 | 723 | 308 | 17.7933093 | 6.166752145 | -1.528752092 | Down | 2.68E-60 | 1.29E-59   | AAEL000838-PA OS=Aedes aegypti GN=AAEL000838 PE=4 SV=1                |
| CCG003542.1 | 643  | 773 | 308 | 51.6572393 | 16.74517768 | -1.625224859 | Down | 3.04E-70 | 1.51E-69   | AAEL002074-PA OS=Aedes aegypti GN=AAEL002074 PE=4 SV=1                |
| CCG020003.2 | 1118 | 9   | 309 | 0.34591021 | 9.661992417 | 4.80385123   | Up   | 1.09E-06 | 2.01E-06   | -                                                                     |
| CCG008373.1 | 795  | 27  | 309 | 1.45934948 | 13.58755663 | 3.21888873   | Up   | 2.28E-12 | 5.41E-12   | AAEL005009-PA OS=Aedes aegypti GN=AAEL005009 PE=4 SV=1                |
| CCG006541.1 | 693  | 77  | 309 | 4.77441496 | 15.58745674 | 1.706989691  | Up   | 0        | 0          | -                                                                     |
| CCG028053.1 | 2640 | 78  | 309 | 1.26956034 | 4.091707395 | 1.688374013  | Up   | 0        | 0          | AAEL002820-PA OS=Aedes aegypti GN=AAEL002820 PE=4 SV=1                |
| CCG015227.1 | 609  | 121 | 309 | 8.53750064 | 17.73745078 | 1.054912994  | Up   | 1.10E-12 | 2.71E-12   | AAEL012658-PA OS=Aedes aegypti GN=AAEL012658 PE=4 SV=1                |
| CCG002508.1 | 1638 | 806 | 309 | 21.1438377 | 6.594693237 | -1.680859797 | Down | 1.00E-76 | 5.04E-76   | AAEL000101-PA OS=Aedes aegypti GN=AAEL000101 PE=4 SV=1                |
| CCG019377.1 | 954  | 2   | 310 | 0.0900833  | 11.35960776 | 6.978437609  | Up   | 9.36E-05 | 0.00015382 | AAEL000643-PA OS=Aedes aegypti GN=AAEL006643 PE=4 SV=1                |
| CCG012580.1 | 1587 | 24  | 310 | 0.64982585 | 6.828648897 | 3.393475108  | Up   | 1.93E-11 | 4.23E-11   | AAEL003700-PA OS=Aedes aegypti GN=AAEL003700 PE=4 SV=1                |
| CCG016263.1 | 954  | 30  | 310 | 1.35124952 | 11.35960776 | 3.071547013  | Up   | 3.71E-13 | 9.95E-13   | -                                                                     |
| CCG008060.1 | 917  | 49  | 310 | 2.29609269 | 11.81795616 | 2.363727765  | Up   | 0        | 0          | AAEL008171-PA OS=Aedes aegypti GN=AAEL008171 PE=4 SV=1                |
| CCG024387.1 | 1904 | 70  | 310 | 1.57976965 | 5.691736239 | 1.849154592  | Up   | 0        | 0          | AAEL002739-PA OS=Aedes aegypti GN=AAEL002739 PE=4 SV=1                |

|             |      |     |     |            |             |              |      |          |          |                                                                                          |
|-------------|------|-----|-----|------------|-------------|--------------|------|----------|----------|------------------------------------------------------------------------------------------|
| CCG001923.1 | 1087 | 98  | 310 | 3.87399631 | 9.969701747 | 1.363727765  | Up   | 0        | 0        | AAEL001573-PA OS=Aedes aegypti GN=AAEL001573 PE=4 SV=1                                   |
| CCG002172.1 | 1881 | 109 | 310 | 2.49000589 | 5.761332163 | 1.210253284  | Up   | 0        | 0        | AAEL011366-PA OS=Aedes aegypti GN=AAEL011366 PE=4 SV=1                                   |
| CCG012609.1 | 1527 | 4   | 311 | 0.11255988 | 7.119858596 | 5.983083974  | Up   | 2.95E-05 | 5.03E-05 | Putative uncharacterized protein OS=Culex quinquefasciatus GN=CpipJ_CPIJ005075 PE=4 SV=1 |
| CCG018427.1 | 996  | 9   | 311 | 0.38828073 | 10.91568682 | 4.813158973  | Up   | 1.09E-06 | 2.01E-06 | AAEL006547-PA OS=Aedes aegypti GN=AAEL006547 PE=2 SV=1                                   |
| CCG011683.1 | 1725 | 16  | 311 | 0.39855986 | 6.302622653 | 3.983083974  | Up   | 7.09E-09 | 1.42E-08 | AAEL000053-PA OS=Aedes aegypti GN=AAEL000053 PE=4 SV=1                                   |
| CCG022454.1 | 525  | 41  | 311 | 3.35573166 | 20.70861729 | 2.625531969  | Up   | 1.02E-13 | 3.19E-13 | Structural maintenance of chromosomes protein OS=Aedes aegypti GN=AAEL001655 PE=3 SV=1   |
| CCG020881.1 | 2319 | 51  | 311 | 0.94500063 | 4.688238066 | 2.310658632  | Up   | 0        | 0        | AAEL010663-PA OS=Aedes aegypti GN=AAEL010663 PE=4 SV=1                                   |
| CCG017421.1 | 588  | 56  | 311 | 4.09235568 | 18.48983686 | 2.175729052  | Up   | 0        | 0        | AAEL012081-PA OS=Aedes aegypti GN=AAEL012081 PE=4 SV=1                                   |
| CCG024154.1 | 582  | 60  | 311 | 4.42986955 | 18.68045374 | 2.076193378  | Up   | 0        | 0        | AAEL011841-PA OS=Aedes aegypti GN=AAEL011841 PE=3 SV=1                                   |
| CCG020245.1 | 618  | 62  | 311 | 4.31087952 | 17.59227197 | 2.028887664  | Up   | 0        | 0        | AAEL003288-PA OS=Aedes aegypti GN=AAEL003288 PE=3 SV=1                                   |
| CCG019452.1 | 4631 | 62  | 311 | 0.5752804  | 2.347662292 | 2.028887664  | Up   | 0        | 0        | AAEL003737-PA (Fragment) OS=Aedes aegypti GN=AAEL003737 PE=4 SV=1                        |
| CCG016027.1 | 3141 | 65  | 311 | 0.88921769 | 3.461325717 | 1.960716161  | Up   | 0        | 0        | AAEL011173-PA OS=Aedes aegypti GN=AAEL011173 PE=4 SV=1                                   |
| CCG025863.1 | 896  | 86  | 311 | 4.12432721 | 12.13395544 | 1.556819219  | Up   | 0        | 0        | -                                                                                        |
| CCG004687.1 | 888  | 90  | 311 | 4.35504067 | 12.24327036 | 1.491230878  | Up   | 0        | 0        | AAEL004867-PA OS=Aedes aegypti GN=AAEL004867 PE=4 SV=1                                   |
| CCG016524.1 | 501  | 725 | 311 | 62.1817517 | 21.70064686 | -1.518753211 | Down | 6.87E-60 | 3.31E-59 | AAEL003467-PA OS=Aedes aegypti GN=AAEL003467 PE=4 SV=1                                   |
| CCG021610.1 | 1275 | 54  | 312 | 1.81989464 | 8.554495963 | 2.232827921  | Up   | 0        | 0        | AAEL008393-PA OS=Aedes aegypti GN=AAEL008393 PE=4 SV=1                                   |

|             |      |      |     |            |             |              |      |           |            |                                                                                          |
|-------------|------|------|-----|------------|-------------|--------------|------|-----------|------------|------------------------------------------------------------------------------------------|
| CCG018752.2 | 3892 | 75   | 312 | 0.82803959 | 2.802410677 | 1.758896732  | Up   | 0         | 0          | AAEL006864-PA OS=Aedes aegypti GN=AAEL006864 PE=4 SV=1                                   |
| CCG024948.1 | 584  | 81   | 312 | 5.95984333 | 18.67633965 | 1.64786542   | Up   | 4.46E-14  | 1.51E-13   | -                                                                                        |
| CCG020167.1 | 2360 | 118  | 312 | 2.14848673 | 4.621602692 | 1.105072373  | Up   | 4.60E-14  | 1.55E-13   | AAEL006622-PA OS=Aedes aegypti GN=AAEL006622 PE=3 SV=1                                   |
| CCG015143.1 | 2728 | 606  | 312 | 9.54532961 | 3.998160687 | -1.255458561 | Down | 5.11E-38  | 2.26E-37   | AAEL014428-PA OS=Aedes aegypti GN=AAEL014428 PE=3 SV=1                                   |
| CCG013932.1 | 1773 | 1193 | 312 | 28.9130814 | 6.151710295 | -2.232662905 | Down | 1.41E-164 | 8.13E-164  | Acetylcholinesterase OS=Aedes albopictus GN=AP-AChE PE=2 SV=1                            |
| CCG010906.1 | 417  | 2    | 313 | 0.20608985 | 26.23966578 | 6.992332051  | Up   | 9.36E-05  | 0.00015364 | Histone H2B OS=Aedes aegypti GN=AAEL015674 PE=3 SV=1                                     |
| CCG023769.1 | 653  | 55   | 313 | 3.61919664 | 16.7564175  | 2.210972337  | Up   | 0         | 0          | Putative uncharacterized protein OS=Culex quinquefasciatus GN=CpipJ_CPIJ009802 PE=4 SV=1 |
| CCG012002.1 | 927  | 91   | 313 | 4.21817244 | 11.8036037  | 1.484537411  | Up   | 0         | 0          | AAEL004900-PA OS=Aedes aegypti GN=AAEL004900 PE=3 SV=1                                   |
| CCG007261.1 | 1243 | 120  | 313 | 4.14832514 | 8.802848455 | 1.085441455  | Up   | 1.18E-13  | 3.65E-13   | AAEL011762-PA OS=Aedes aegypti GN=AAEL011762 PE=4 SV=1                                   |
| CCG024472.1 | 2244 | 1431 | 313 | 27.4018227 | 4.876087625 | -2.490475906 | Down | 6.88E-225 | 4.17E-224  | Putative uncharacterized protein OS=Culex quinquefasciatus GN=CpipJ_CPIJ005148 PE=4 SV=1 |
| CCG015870.1 | 848  | 2527 | 313 | 128.047782 | 12.90323187 | -3.310877898 | Down | 0         | 0          | NADH dehydrogenase OS=Ochlerotatus taeniorhynchus PE=2 SV=1                              |
| CCG004463.1 | 645  | 11   | 314 | 0.73281718 | 17.01844792 | 4.537502334  | Up   | 2.67E-07  | 5.03E-07   | AAEL009356-PA OS=Aedes aegypti GN=AAEL009356 PE=4 SV=1                                   |
| CCG017508.1 | 1125 | 39   | 314 | 1.48961747 | 9.757243472 | 2.711531734  | Up   | 7.33E-14  | 2.38E-13   | AAEL000786-PA OS=Aedes aegypti GN=AAEL000786 PE=4 SV=1                                   |
| CCG011631.1 | 1680 | 43   | 314 | 1.09982059 | 6.533868397 | 2.570669198  | Up   | 8.46E-14  | 2.70E-13   | AAEL009924-PA OS=Aedes aegypti GN=AAEL009924 PE=4 SV=1                                   |
| CCG000111.2 | 1185 | 54   | 314 | 1.95811449 | 9.263205828 | 2.242046451  | Up   | 0         | 0          | AAEL012236-PA OS=Aedes aegypti GN=AAEL012236 PE=4 SV=1                                   |
| CCG003731.1 | 4922 | 68   | 314 | 0.59364932 | 2.23017044  | 1.909471111  | Up   | 0         | 0          | AAEL012505-PA OS=Aedes aegypti GN=AAEL012505 PE=4 SV=1                                   |

|             |      |      |     |            |             |              |      |           |           |                                                                      |
|-------------|------|------|-----|------------|-------------|--------------|------|-----------|-----------|----------------------------------------------------------------------|
| CCG009573.1 | 909  | 104  | 314 | 4.91622926 | 12.07579638 | 1.296494235  | Up   | 0         | 0         | AAEL009293-PA OS=Aedes aegypti GN=AAEL009293 PE=4 SV=1               |
| CCG011918.1 | 1908 | 529  | 314 | 11.9135166 | 5.75309167  | -1.050189959 | Down | 1.88E-25  | 7.66E-25  | AAEL010268-PA OS=Aedes aegypti GN=AAEL010268 PE=4 SV=1               |
| CCG004185.1 | 1059 | 651  | 314 | 26.4148227 | 10.36534363 | -1.34957978  | Down | 2.23E-45  | 1.02E-44  | AAEL012518-PA OS=Aedes aegypti GN=AAEL012518 PE=4 SV=1               |
| CCG001401.1 | 1157 | 1596 | 314 | 59.2737221 | 9.487380213 | -2.643310984 | Down | 2.39E-268 | 1.49E-267 | AAEL002971-PA OS=Aedes aegypti GN=AAEL002971 PE=4 SV=1               |
| CCG012514.1 | 1050 | 0    | 315 | 0.001      | 10.48748303 | 13.35638086  | Up   | 4.44E-16  | 1.65E-15  | AAEL007783-PA OS=Aedes aegypti GN=AAEL007783 PE=4 SV=1               |
| CCG017875.1 | 1644 | 26   | 315 | 0.67957001 | 6.698209965 | 3.301081504  | Up   | 4.60E-12  | 1.05E-11  | AAEL010362-PA OS=Aedes aegypti GN=AAEL010362 PE=4 SV=1               |
| CCG014942.1 | 971  | 28   | 315 | 1.23908606 | 11.3407386  | 3.1941663    | Up   | 1.17E-12  | 2.86E-12  | AAEL001358-PA OS=Aedes aegypti GN=AAEL001358 PE=4 SV=1               |
| CCG008178.1 | 624  | 40   | 315 | 2.75447017 | 17.64720702 | 2.679593127  | Up   | 6.86E-14  | 2.25E-13  | Transmembrane trafficking protein OS=Aedes aegypti PE=2 SV=1         |
| CCG021103.1 | 2042 | 56   | 315 | 1.17840604 | 5.392682264 | 2.1941663    | Up   | 0         | 0         | AAEL001986-PA OS=Aedes aegypti GN=AAEL001986 PE=3 SV=1               |
| CCG002443.1 | 1521 | 84   | 315 | 2.37308199 | 7.239879805 | 1.609203799  | Up   | 0         | 0         | AAEL011053-PA OS=Aedes aegypti GN=AAEL011053 PE=4 SV=1               |
| CCG000820.1 | 1617 | 110  | 315 | 2.9231112  | 6.810053917 | 1.220161509  | Up   | 0         | 0         | AAEL006805-PA OS=Aedes aegypti GN=CYP9J2 PE=3 SV=2                   |
| CCG017061.1 | 2703 | 971  | 315 | 15.4360386 | 4.073939025 | -1.921806263 | Down | 1.15E-110 | 6.20E-110 | AAEL009530-PA OS=Aedes aegypti GN=AAEL009530 PE=4 SV=1               |
| CCG015079.1 | 498  | 4    | 316 | 0.34513843 | 22.18236036 | 6.006093952  | Up   | 2.95E-05  | 5.04E-05  | AAEL012441-PA OS=Aedes aegypti GN=AAEL012441 PE=4 SV=1               |
| CCG007878.1 | 390  | 7    | 316 | 0.77125165 | 28.32516785 | 5.19873903   | Up   | 4.31E-06  | 7.69E-06  | AAEL004909-PA OS=Aedes aegypti GN=AAEL004909 PE=4 SV=1               |
| CCG022620.1 | 1002 | 42   | 316 | 1.8011266  | 11.02476593 | 2.613776529  | Up   | 7.66E-14  | 2.47E-13  | -                                                                    |
| CCG022673.1 | 411  | 47   | 316 | 4.91381393 | 26.8778965  | 2.4515051    | Up   | 0         | 0         | Histone H3 OS=Gecko japonicus PE=2 SV=1                              |
| CCG017795.1 | 498  | 55   | 316 | 4.74565342 | 22.18236036 | 2.224734238  | Up   | 0         | 0         | Nuclear receptor FTZ-F1 protein OS=Aedes aegypti GN=FTZ-F1 PE=2 SV=1 |

|             |       |      |     |            |             |              |      |          |          |                                                                                          |
|-------------|-------|------|-----|------------|-------------|--------------|------|----------|----------|------------------------------------------------------------------------------------------|
| CCG020264.1 | 399   | 76   | 316 | 8.18471135 | 27.68625429 | 1.758166439  | Up   | 0        | 0        | AAEL008355-PA OS=Aedes aegypti GN=AAEL008355 PE=4 SV=1                                   |
| CCG008921.1 | 1422  | 102  | 316 | 3.08221725 | 7.768505949 | 1.33366861   | Up   | 0        | 0        | AAEL012917-PA (Fragment) OS=Aedes aegypti GN=AAEL012917 PE=4 SV=1                        |
| CCG027457.1 | 1605  | 119  | 316 | 3.18591802 | 6.882751065 | 1.111276189  | Up   | 0        | 0        | AAEL001144-PA OS=Aedes aegypti GN=AAEL001144 PE=4 SV=1                                   |
| CCG021954.1 | 1029  | 825  | 316 | 34.4509534 | 10.73548636 | -1.682156357 | Down | 1.41E-78 | 7.14E-78 | AAEL008227-PA OS=Aedes aegypti GN=AAEL008227 PE=4 SV=1                                   |
| CCG014168.1 | 1760  | 30   | 317 | 0.73243866 | 6.29646235  | 3.103761638  | Up   | 3.71E-13 | 9.95E-13 | AAEL002849-PA OS=Aedes aegypti GN=AAEL002849 PE=4 SV=1                                   |
| CCG011611.2 | 1893  | 49   | 317 | 1.11226466 | 5.854080157 | 2.39594239   | Up   | 0        | 0        | AAEL013796-PA OS=Aedes aegypti GN=AAEL013796 PE=4 SV=1                                   |
| CCG012492.1 | 1068  | 116  | 317 | 4.66712473 | 10.37619264 | 1.152671239  | Up   | 1.26E-13 | 3.88E-13 | AAEL004448-PA OS=Aedes aegypti GN=AAEL004448 PE=4 SV=1                                   |
| CCG027218.1 | 852   | 1879 | 317 | 94.7654124 | 13.00677669 | -2.865097117 | Down | 0        | 0        | AAEL008601-PA OS=Aedes aegypti GN=AAEL008601 PE=2 SV=1                                   |
| CCG005313.1 | 1047  | 2645 | 317 | 108.552959 | 10.58431111 | -3.358399773 | Down | 0        | 0        | AAEL003067-PB OS=Aedes aegypti GN=AAEL003067 PE=4 SV=1                                   |
| CCG023636.1 | 1611  | 26   | 318 | 0.69349044 | 6.900516458 | 3.314756441  | Up   | 4.60E-12 | 1.05E-11 | AAEL007931-PA OS=Aedes aegypti GN=AAEL007931 PE=4 SV=1                                   |
| CCG005525.1 | 12363 | 56   | 318 | 0.19463764 | 0.899193724 | 2.207841237  | Up   | 0        | 0        | Cytoplasmic dynein heavy chain OS=Culex quinquefasciatus GN=CpipJ_CPIJ005887 PE=4 SV=1   |
| CCG025806.1 | 2025  | 102  | 318 | 2.16440145 | 5.489744204 | 1.342770817  | Up   | 0        | 0        | AAEL010576-PA OS=Aedes aegypti GN=AAEL010576 PE=4 SV=1                                   |
| CCG008667.1 | 1600  | 120  | 318 | 3.2227301  | 6.947957508 | 1.108305563  | Up   | 0        | 0        | AAEL011053-PA OS=Aedes aegypti GN=AAEL011053 PE=4 SV=1                                   |
| CCG025552.1 | 507   | 2234 | 318 | 189.338042 | 21.92649312 | -3.110217311 | Down | 0        | 0        | AAEL008006-PA OS=Aedes aegypti GN=AAEL008006 PE=4 SV=1                                   |
| CCG020385.1 | 768   | 50   | 319 | 2.79750876 | 14.52043007 | 2.375869628  | Up   | 0        | 0        | Putative uncharacterized protein OS=Culex quinquefasciatus GN=CpipJ_CPIJ013304 PE=4 SV=1 |
| CCG023007.1 | 750   | 87   | 319 | 4.98448921 | 14.86892039 | 1.576782322  | Up   | 0        | 0        | AAEL011338-PA OS=Aedes aegypti GN=AAEL011338 PE=4 SV=1                                   |

|             |       |      |     |            |             |              |      |           |           |                                                                                                                           |
|-------------|-------|------|-----|------------|-------------|--------------|------|-----------|-----------|---------------------------------------------------------------------------------------------------------------------------|
| CCG026473.1 | 394   | 0    | 320 | 0.001      | 28.39250905 | 14.79322273  | Up   | 4.44E-16  | 1.66E-15  | Chromosome undetermined SCAF14565, whole genome shotgun sequence OS=Tetraodon nigroviridis GN=GSTENG00016696001 PE=3 SV=1 |
| CCG017120.1 | 759   | 15   | 320 | 0.84920424 | 14.73866741 | 4.117350703  | Up   | 1.48E-08  | 2.93E-08  | AAEL009090-FA OS=Aedes aegypti GN=AAEL009090 PE=4 SV=1                                                                    |
| CCG024425.1 | 1164  | 32   | 320 | 1.18129855 | 9.610522824 | 3.024241299  | Up   | 1.77E-13  | 5.16E-13  | Ribonuclease OS=Aedes aegypti GN=AAEL003510 PE=3 SV=1                                                                     |
| CCG017979.1 | 957   | 35   | 320 | 1.57151589 | 11.68928795 | 2.894958282  | Up   | 6.39E-14  | 2.11E-13  | Aldo/keto reductase OS=Aedes aegypti PE=2 SV=1                                                                            |
| CCG008813.1 | 902   | 77   | 320 | 3.66814808 | 12.40204941 | 1.757454758  | Up   | 0         | 0         | AAEL007238-FA OS=Aedes aegypti GN=AAEL007238 PE=4 SV=1                                                                    |
| CCG022599.1 | 1306  | 89   | 320 | 2.9282591  | 8.565580832 | 1.548507868  | Up   | 0         | 0         | Serine/threonine protein kinase OS=Culex quinquefasciatus GN=CpipJ_CPIJ011728 PE=4 SV=1                                   |
| CCG009971.1 | 12781 | 111  | 320 | 0.37318211 | 0.875256128 | 1.229825432  | Up   | 0         | 0         | -                                                                                                                         |
| CCG021715.1 | 2295  | 1290 | 320 | 24.1529227 | 4.874356674 | -2.308914052 | Down | 2.45E-185 | 1.44E-184 | AAEL007028-FA OS=Aedes aegypti GN=AAEL007028 PE=4 SV=1                                                                    |
| CCG011440.1 | 577   | 26   | 321 | 1.93624454 | 19.4481921  | 3.328302973  | Up   | 4.60E-12  | 1.05E-11  | -                                                                                                                         |
| CCG000374.1 | 2772  | 26   | 321 | 0.40303503 | 4.048198717 | 3.328302973  | Up   | 4.60E-12  | 1.05E-11  | Putative uncharacterized protein OS=Culex quinquefasciatus GN=CpipJ_CPIJ014679 PE=4 SV=1                                  |
| CCG025943.1 | 435   | 38   | 321 | 3.75367797 | 25.79679734 | 2.780815177  | Up   | 4.26E-14  | 1.45E-13  | Uncharacterized protein OS=Anopheles darlingi GN=AND_12728 PE=4 SV=1                                                      |
| CCG003800.1 | 1023  | 83   | 321 | 3.486303   | 10.96931265 | 1.65370326   | Up   | 1.32E-13  | 4.02E-13  | AAEL001041-FA OS=Aedes aegypti GN=AAEL001041 PE=4 SV=1                                                                    |
| CCG024002.1 | 1257  | 123  | 321 | 4.2046757  | 8.927292636 | 1.086228186  | Up   | 0         | 0         | AAEL008822-FA OS=Aedes aegypti GN=AAEL008822 PE=4 SV=1                                                                    |
| CCG000773.1 | 498   | 557  | 321 | 48.0605265 | 22.53334708 | -1.092790826 | Down | 2.10E-28  | 8.78E-28  | S95 ribosomal protein L35, mitochondrial OS=Culex quinquefasciatus GN=CpipJ_CPIJ019136 PE=4 SV=1                          |



|             |       |      |     |            |             |              |      |           |           |                                                                      |
|-------------|-------|------|-----|------------|-------------|--------------|------|-----------|-----------|----------------------------------------------------------------------|
| CCG004903.1 | 11847 | 1174 | 321 | 4.25816396 | 0.947210842 | -2.168474002 | Down | 3.70E-156 | 2.12E-155 | AAEL007293-PA OS=Aedes aegypti GN=AAEL007293 PE=2 SV=1               |
| CCG022471.1 | 1527  | 2615 | 321 | 73.5860223 | 7.348792956 | -3.32385254  | Down | 0         | 0         | Dihydrolipoyl dehydrogenase OS=Aedes aegypti GN=AAEL006928 PE=3 SV=1 |
| CCG023511.1 | 718   | 26   | 322 | 1.5560071  | 15.6776673  | 3.332790364  | Up   | 4.60E-12  | 1.05E-11  | AAEL000215-PA OS=Aedes aegypti GN=AAEL000215 PE=3 SV=1               |
| CCG014195.1 | 1689  | 76   | 322 | 1.93351085 | 6.66463299  | 1.785302568  | Up   | 0         | 0         | AAEL012057-PA OS=Aedes aegypti GN=AAEL012057 PE=4 SV=1               |
| CCG013816.1 | 669   | 641  | 322 | 41.1713003 | 16.82595683 | -1.290950465 | Down | 7.77E-42  | 3.49E-41  | AAEL013528-PA OS=Aedes aegypti GN=TPX1 PE=4 SV=1                     |
| CCG023555.1 | 2539  | 1273 | 322 | 21.5441009 | 4.43346401  | -2.280786622 | Down | 3.47E-180 | 2.03E-179 | AAEL001499-PA OS=Aedes aegypti GN=AAEL001499 PE=4 SV=1               |
| CCG009484.1 | 603   | 27   | 323 | 1.92401797 | 18.72557777 | 3.282816056  | Up   | 2.28E-12  | 5.41E-12  | AAEL004976-PA OS=Aedes aegypti GN=AAEL004976 PE=4 SV=1               |
| CCG004524.1 | 1749  | 34   | 323 | 0.83531788 | 6.45598822  | 2.950240717  | Up   | 8.82E-14  | 2.80E-13  | AGAP005314-PA OS=Anopheles gambiae GN=AGAP005314 PE=4 SV=2           |
| CCG008296.1 | 3942  | 82   | 323 | 0.89384024 | 2.864414865 | 1.680151554  | Up   | 0         | 0         | AAEL006614-PA OS=Aedes aegypti GN=AAEL006614 PE=4 SV=1               |
| CCG013239.1 | 1368  | 86   | 323 | 2.70131373 | 8.254037571 | 1.611438804  | Up   | 0         | 0         | AGAP006454-PA OS=Anopheles gambiae GN=AGAP006454 PE=4 SV=4           |
| CCG023037.1 | 219   | 89   | 323 | 17.4625862 | 51.55946757 | 1.561970128  | Up   | 0         | 0         | AAEL002578-PA OS=Aedes aegypti GN=AAEL002578 PE=4 SV=1               |
| CCG015268.1 | 1863  | 117  | 323 | 2.69858237 | 6.060935801 | 1.167338839  | Up   | 9.73E-14  | 3.06E-13  | AAEL006244-PA OS=Aedes aegypti GN=AAEL006244 PE=4 SV=1               |
| CCG012524.1 | 2063  | 603  | 323 | 12.5597431 | 5.473351138 | -1.198310633 | Down | 2.93E-35  | 1.27E-34  | AAEL002579-PA OS=Aedes aegypti GN=AAEL002579 PE=4 SV=1               |
| CCG018736.1 | 738   | 697  | 323 | 40.5825271 | 15.30016721 | -1.407311287 | Down | 1.43E-51  | 6.73E-51  | AAEL010075-PA OS=Aedes aegypti GN=AAEL010075 PE=3 SV=1               |
| CCG017086.1 | 3509  | 790  | 323 | 9.67400694 | 3.217875006 | -1.588005285 | Down | 2.04E-69  | 1.01E-68  | AAEL015018-PA (Fragment) OS=Aedes aegypti GN=AAEL015018 PE=4 SV=1    |

|             |      |      |     |            |             |              |      |           |           |                                                                                                   |
|-------------|------|------|-----|------------|-------------|--------------|------|-----------|-----------|---------------------------------------------------------------------------------------------------|
| CCG008353.1 | 861  | 8    | 324 | 0.39925421 | 13.15503098 | 5.042163207  | Up   | 2.19E-06  | 3.97E-06  | Putative uncharacterized protein<br>OS=Culex quinquefasciatus<br>GN=CpipJ_CPIJ018760 PE=4<br>SV=1 |
| CCG004511.1 | 1470 | 15   | 324 | 0.43846668 | 7.705089574 | 4.135272611  | Up   | 1.48E-08  | 2.93E-08  | Putative uncharacterized protein<br>OS=Culex quinquefasciatus<br>GN=CpipJ_CPIJ014034 PE=4<br>SV=1 |
| CCG000370.1 | 2193 | 23   | 324 | 0.45066297 | 5.164834325 | 3.518601251  | Up   | 4.01E-11  | 8.67E-11  | AAEL003691-PA OS=Aedes<br>aegypti GN=AAEL003691 PE=4<br>SV=1                                      |
| CCG021558.1 | 987  | 39   | 324 | 1.69789225 | 11.47566532 | 2.756760988  | Up   | 7.33E-14  | 2.38E-13  | AAEL008320-PA OS=Aedes<br>aegypti GN=AAEL008320 PE=4<br>SV=1                                      |
| CCG009574.1 | 1455 | 98   | 324 | 2.89418144 | 7.784523487 | 1.427453363  | Up   | 0         | 0         | AAEL009282-PA OS=Aedes<br>aegypti GN=AAEL009282 PE=4<br>SV=1                                      |
| CCG006593.1 | 1179 | 699  | 324 | 25.4756951 | 9.606854686 | -1.406985439 | Down | 1.07E-51  | 5.04E-51  | Cytosolic acid phosphatase<br>OS=Culex quinquefasciatus<br>GN=CpipJ_CPIJ008635 PE=4<br>SV=1       |
| CCG017341.1 | 3039 | 1007 | 324 | 14.2384083 | 3.727042341 | -1.933684761 | Down | 1.20E-115 | 6.53E-115 | AAEL003025-PA OS=Aedes<br>aegypti GN=AAEL003025 PE=4<br>SV=1                                      |
| CCG023926.1 | 813  | 5587 | 324 | 295.291399 | 13.93171178 | -4.405694898 | Down | 0         | 0         | AAEL012646-PA OS=Aedes<br>aegypti GN=AAEL012646 PE=4<br>SV=1                                      |
| CCG002306.1 | 576  | 25   | 325 | 1.86500584 | 19.72472214 | 3.402752922  | Up   | 9.32E-12  | 2.08E-11  | AAEL010504-PA OS=Aedes<br>aegypti GN=AAEL010504 PE=4<br>SV=1                                      |
| CCG026907.1 | 1260 | 29   | 325 | 0.98898596 | 9.017015834 | 3.188628117  | Up   | 6.66E-13  | 1.69E-12  | AAEL003744-PA (Fragment)<br>OS=Aedes aegypti<br>GN=AAEL003744 PE=4 SV=1                           |
| CCG012407.1 | 460  | 36   | 325 | 3.3628488  | 24.6987825  | 2.87668411   | Up   | 6.13E-14  | 2.03E-13  | AAEL009759-PA OS=Aedes<br>aegypti GN=AAEL009759 PE=4<br>SV=1                                      |
| CCG006333.1 | 2628 | 60   | 325 | 0.98104417 | 4.32322677  | 2.139718516  | Up   | 0         | 0         | Uncharacterized protein<br>OS=Nomascus leucogenys<br>GN=ZNF808 PE=4 SV=1                          |
| CCG008877.1 | 921  | 61   | 325 | 2.84598677 | 12.33598257 | 2.115871774  | Up   | 1.75E-14  | 6.18E-14  | AAEL009222-PA OS=Aedes<br>aegypti GN=AAEL009222 PE=4<br>SV=1                                      |
| CCG008401.1 | 1170 | 88   | 325 | 3.23191166 | 9.710632437 | 1.587177493  | Up   | 2.93E-14  | 1.02E-13  | AAEL008120-PA OS=Aedes<br>aegypti GN=AAEL008120 PE=3<br>SV=1                                      |

|             |      |      |     |            |             |              |      |           |           |                                                                                                   |
|-------------|------|------|-----|------------|-------------|--------------|------|-----------|-----------|---------------------------------------------------------------------------------------------------|
| CCG010037.1 | 253  | 119  | 325 | 20.2110609 | 44.90687728 | 1.151791348  | Up   | 0         | 0         | Uncharacterized protein<br>OS=Anopheles darlingi<br>GN=AND_05744 PE=4 SV=1                        |
| CCG013104.1 | 540  | 893  | 325 | 71.0592093 | 21.03970361 | -1.755907253 | Down | 3.83E-90  | 1.99E-89  | AAEL004729-FA OS=Aedes<br>aegypti GN=AAEL004729 PE=4<br>SV=1                                      |
| CCG023784.1 | 4026 | 982  | 325 | 10.4809437 | 2.822016878 | -1.892970103 | Down | 1.19E-109 | 6.41E-109 | AAEL012395-FA OS=Aedes<br>aegypti GN=AAEL012395 PE=3<br>SV=1                                      |
| CCG026029.1 | 1367 | 2144 | 325 | 67.3936438 | 8.311221617 | -3.019480079 | Down | 0         | 0         | Larval chymotrypsin-like protein<br>(Precursor) OS=Aedes aegypti<br>PE=2 SV=1                     |
| CCG018556.1 | 906  | 40   | 326 | 1.89711853 | 12.57880599 | 2.729113263  | Up   | 6.86E-14  | 2.25E-13  | AAEL002179-FA OS=Aedes<br>aegypti GN=AAEL002179 PE=4<br>SV=1                                      |
| CCG012315.1 | 2652 | 62   | 326 | 1.00457147 | 4.2972844   | 2.096845048  | Up   | 0         | 0         | AAEL013690-FA OS=Aedes<br>aegypti GN=AAEL013690 PE=4<br>SV=1                                      |
| CCG012731.1 | 1233 | 70   | 326 | 2.43948209 | 9.242820947 | 1.921758341  | Up   | 0         | 0         | AAEL008867-FA OS=Aedes<br>aegypti GN=AAEL008867 PE=4<br>SV=1                                      |
| CCG007749.1 | 459  | 92   | 326 | 8.61267012 | 24.82875431 | 1.527479402  | Up   | 1.44E-14  | 5.12E-14  | Nuclear protein localization 4<br>OS=Culex quinquefasciatus<br>GN=CpipJ_CPIJ006953 PE=4<br>SV=1   |
| CCG020117.1 | 1689 | 611  | 326 | 15.5444096 | 6.747423462 | -1.203987212 | Down | 5.80E-36  | 2.53E-35  | AAEL012981-FA OS=Aedes<br>aegypti GN=AAEL012981 PE=4<br>SV=1                                      |
| CCG016857.1 | 1488 | 653  | 326 | 18.8570139 | 7.658869777 | -1.299897823 | Down | 4.96E-43  | 2.24E-42  | Putative uncharacterized protein<br>OS=Culex quinquefasciatus<br>GN=CpipJ_CPIJ011712 PE=4<br>SV=1 |
| CCG017570.1 | 984  | 25   | 327 | 1.09171074 | 11.61723222 | 3.41160384   | Up   | 9.32E-12  | 2.08E-11  | Trypsin-like salivary secreted<br>protein OS=Aedes albopictus<br>PE=2 SV=1                        |
| CCG010565.1 | 1550 | 49   | 327 | 1.35839806 | 7.375068713 | 2.440750185  | Up   | 0         | 0         | AAEL011655-FA OS=Aedes<br>aegypti GN=AAEL011655 PE=3<br>SV=1                                      |
| CCG015011.1 | 1365 | 54   | 327 | 1.69990159 | 8.37462015  | 2.300572527  | Up   | 0         | 0         | AAEL010118-FA OS=Aedes<br>aegypti GN=AAEL010118 PE=4<br>SV=1                                      |
| CCG010526.1 | 1770 | 111  | 327 | 2.69471217 | 6.458393505 | 1.261044163  | Up   | 0         | 0         | Putative uncharacterized protein<br>OS=Culex quinquefasciatus<br>GN=CpipJ_CPIJ017830 PE=4<br>SV=1 |
| CCG025860.1 | 3537 | 674  | 327 | 8.18818239 | 3.231935681 | -1.341144752 | Down | 1.75E-46  | 8.03E-46  | AAEL000712-FA OS=Aedes<br>aegypti GN=AAEL000712 PE=4<br>SV=1                                      |

|             |      |      |     |            |             |              |      |           |           |                                                                                                            |
|-------------|------|------|-----|------------|-------------|--------------|------|-----------|-----------|------------------------------------------------------------------------------------------------------------|
| CCG027708.4 | 4228 | 1007 | 327 | 10.2342769 | 2.703726704 | -1.920387939 | Down | 1.39E-114 | 7.51E-114 | AAEL004582-PA OS=Aedes aegypti GN=AAEL004582 PE=4 SV=1                                                     |
| CCG026865.1 | 1575 | 1422 | 327 | 38.7955318 | 7.25800413  | -2.41824572  | Down | 7.59E-216 | 4.57E-215 | Putative adenosine deaminase OS=Aedes albopictus PE=2 SV=1                                                 |
| CCG020712.1 | 2156 | 1693 | 327 | 33.742004  | 5.302113407 | -2.669906229 | Down | 9.45E-288 | 5.91E-287 | AAEL007191-PA OS=Aedes aegypti GN=AAEL007191 PE=2 SV=1                                                     |
| CCG006433.1 | 222  | 5923 | 327 | 1146.44026 | 51.49259687 | -4.476652341 | Down | 0         | 0         | AAEL009337-PA OS=Aedes aegypti GN=AAEL009337 PE=3 SV=1                                                     |
| CCG014329.1 | 1008 | 45   | 328 | 1.91829172 | 11.37531228 | 2.568012112  | Up   | 0         | 0         | AAEL013887-PA OS=Aedes aegypti GN=AAEL013887 PE=4 SV=1                                                     |
| CCG009733.1 | 1710 | 45   | 328 | 1.13078249 | 6.705447241 | 2.568012112  | Up   | 0         | 0         | AAEL010176-PA OS=Aedes aegypti GN=AAEL010176 PE=4 SV=1                                                     |
| CCG026859.1 | 2078 | 76   | 328 | 1.57155911 | 5.517957065 | 1.811937695  | Up   | 0         | 0         | Eukaryotic translation initiation factor 4 gamma 3 OS=Culex quinquefasciatus GN=CpipJ_CPIJ009979 PE=4 SV=1 |
| CCG002803.1 | 1834 | 132  | 328 | 3.09269628 | 6.252080033 | 1.015471089  | Up   | 1.36E-12  | 3.30E-12  | AAEL000602-PA (Fragment) OS=Aedes aegypti GN=GPRNNB2 PE=4 SV=2                                             |
| CCG019192.1 | 1425 | 33   | 329 | 0.99508859 | 8.071068813 | 3.019862858  | Up   | 1.31E-13  | 4.01E-13  | tetracycline resistance OS=Culex quinquefasciatus GN=CpipJ_CPIJ003321 PE=4 SV=1                            |
| CCG005236.1 | 663  | 60   | 329 | 3.88866377 | 17.34731985 | 2.157366382  | Up   | 0         | 0         | AAEL010173-PA OS=Aedes aegypti GN=AAEL010173 PE=4 SV=1                                                     |
| CCG018902.1 | 4623 | 63   | 329 | 0.58557069 | 2.487837564 | 2.086977054  | Up   | 0         | 0         | Putative uncharacterized protein OS=Culex quinquefasciatus GN=CpipJ_CPIJ010464 PE=4 SV=1                   |
| CCG022230.1 | 1335 | 78   | 329 | 2.51059124 | 8.615185811 | 1.778854759  | Up   | 0         | 0         | AAEL013099-PA OS=Aedes aegypti GN=AAEL013099 PE=4 SV=1                                                     |
| CCG027928.1 | 291  | 26   | 330 | 3.83922027 | 39.64340665 | 3.3681957    | Up   | 4.60E-12  | 1.05E-11  | AAEL005232-PA OS=Aedes aegypti GN=AAEL005232 PE=4 SV=1                                                     |
| CCG025857.1 | 1230 | 34   | 330 | 1.18778128 | 9.379049866 | 2.981172577  | Up   | 8.82E-14  | 2.80E-13  | AAEL000699-PA OS=Aedes aegypti GN=AAEL000699 PE=4 SV=1                                                     |
| CCG014836.1 | 1347 | 34   | 330 | 1.08461097 | 8.564388519 | 2.981172577  | Up   | 8.82E-14  | 2.79E-13  | AAEL011705-PA OS=Aedes aegypti GN=AAEL011705 PE=4 SV=1                                                     |

|             |       |      |     |            |             |              |      |           |           |                                                                                         |
|-------------|-------|------|-----|------------|-------------|--------------|------|-----------|-----------|-----------------------------------------------------------------------------------------|
| CCG024516.1 | 1569  | 73   | 330 | 1.99922921 | 7.352601233 | 1.878810859  | Up   | 0         | 0         | AAEL004895-PA OS=Aedes<br>aegypti GN=AAEL004895 PE=4<br>SV-1                            |
| CCG005255.1 | 1932  | 76   | 330 | 1.69032082 | 5.971134231 | 1.820707905  | Up   | 0         | 0         | AAEL012747-PA OS=Aedes<br>aegypti GN=AAEL012747 PE=4<br>SV-1                            |
| CCG001440.1 | 984   | 96   | 330 | 4.19216923 | 11.72381233 | 1.483672917  | Up   | 0         | 0         | AAEL003240-PA OS=Aedes<br>aegypti GN=AAEL003246 PE=4<br>SV-1                            |
| CCG020713.1 | 420   | 1023 | 330 | 104.661996 | 27.46721746 | -1.929955012 | Down | 3.76E-117 | 2.05E-116 | AAEL001429-PA OS=Aedes<br>aegypti GN=AAEL001429 PE=4<br>SV-1                            |
| CCG022969.1 | 2214  | 6    | 331 | 0.11644915 | 5.226372905 | 5.48803811   | Up   | 8.38E-06  | 1.47E-05  | AAEL014020-PA OS=Aedes<br>aegypti GN=AAEL014020 PE=4<br>SV-1                            |
| CCG019685.1 | 1464  | 34   | 331 | 0.997931   | 7.903818041 | 2.985537769  | Up   | 8.82E-14  | 2.79E-13  | AAEL005592-PA OS=Aedes<br>aegypti GN=AAEL005592 PE=4<br>SV-1                            |
| CCG009434.1 | 768   | 60   | 331 | 3.35701052 | 15.06665314 | 2.166110015  | Up   | 0         | 0         | AAEL014183-PA OS=Aedes<br>aegypti GN=AAEL014183 PE=4<br>SV-1                            |
| CCG014059.1 | 13534 | 8307 | 331 | 26.3742859 | 0.854971894 | -4.947111228 | Down | 0         | 0         | AAEL008032-PA OS=Aedes<br>aegypti GN=AAEL008032 PE=4<br>SV-1                            |
| CCG012610.1 | 1347  | 20   | 332 | 0.63800645 | 8.616293904 | 3.75542454   | Up   | 3.69E-10  | 7.72E-10  | AAEL008419-PA OS=Aedes<br>aegypti GN=AAEL008419 PE=4<br>SV-1                            |
| CCG021159.1 | 2129  | 33   | 332 | 0.66604098 | 5.451455091 | 3.032958516  | Up   | 1.31E-13  | 4.01E-13  | AAEL007980-PA OS=Aedes<br>aegypti GN=AAEL007980 PE=4<br>SV-1                            |
| CCG015262.1 | 948   | 35   | 332 | 1.58643535 | 12.24277203 | 2.948069618  | Up   | 6.39E-14  | 2.10E-13  | AAEL004960-PA OS=Aedes<br>aegypti GN=AAEL004960 PE=4<br>SV-1                            |
| CCG005846.1 | 1048  | 43   | 332 | 1.76307117 | 11.0745686  | 2.65108788   | Up   | 8.46E-14  | 2.70E-13  | AAEL003786-PA OS=Aedes<br>aegypti GN=AAEL003786 PE=4<br>SV-1                            |
| CCG027633.1 | 997   | 72   | 332 | 3.10313028 | 11.6410711  | 1.907427634  | Up   | 0         | 0         | AAEL003390-PA OS=Aedes<br>aegypti GN=AAEL003390 PE=4<br>SV-1                            |
| CCG013794.1 | 1202  | 103  | 332 | 3.68209872 | 9.655697079 | 1.390852108  | Up   | 0         | 0         | G173-specific cyprin-C OS=Culex<br>quinquefasciatus<br>GN=CpipJ_CPIJ006239 PE=3<br>SV-1 |
| CCG005829.1 | 2652  | 3041 | 332 | 49.2726105 | 4.376375524 | -3.492977466 | Down | 0         | 0         | AAEL006822-PA OS=Aedes<br>aegypti GN=AAEL006822 PE=4<br>SV-1                            |
| CCG007048.1 | 606   | 8    | 333 | 0.56725722 | 19.20974615 | 5.081691571  | Up   | 2.19E-06  | 3.96E-06  | AAEL001624-PA OS=Aedes<br>aegypti GN=AAEL001624 PE=4<br>SV-1                            |

|             |      |      |     |            |             |              |      |           |           |                                                                                                   |
|-------------|------|------|-----|------------|-------------|--------------|------|-----------|-----------|---------------------------------------------------------------------------------------------------|
| CCG006231.1 | 2883 | 55   | 333 | 0.81974867 | 4.037844664 | 2.300331857  | Up   | 0         | 0         | isoleducyl-tRNA synthetase<br>OS=Culex quinquefasciatus<br>GN=CpipJ_CPIJ015134 PE=4<br>SV=1       |
| CCG018080.1 | 1968 | 57   | 333 | 1.24455024 | 5.915196222 | 2.248801557  | Up   | 0         | 0         | isoleducyl-tRNA synthetase<br>OS=Culex quinquefasciatus<br>GN=CpipJ_CPIJ015134 PE=4<br>SV=1       |
| CCG005707.1 | 1665 | 65   | 333 | 1.67749715 | 6.991655354 | 2.059323758  | Up   | 0         | 0         | isoleducyl-tRNA synthetase<br>OS=Aedes aegypti<br>GN=AAEL002744 PE=4<br>SV=1                      |
| CCG023663.1 | 732  | 70   | 333 | 4.10912763 | 15.9031505  | 1.952408554  | Up   | 0         | 0         | Eukaryotic translation initiation<br>factor 6 OS=Aedes aegypti<br>GN=EIF6 PE=3 SV=1               |
| CCG020543.1 | 786  | 75   | 333 | 4.10016552 | 14.81056764 | 1.85287288   | Up   | 0         | 0         | AAEL013168-PA (Fragment)<br>OS=Aedes aegypti<br>GN=AAEL013168 PE=3 SV=1                           |
| CCG003273.1 | 537  | 79   | 333 | 6.32143209 | 21.67803755 | 1.777910823  | Up   | 0         | 0         | AAEL007902-PA OS=Aedes<br>aegypti GN=AAEL007902 PE=4<br>SV=1                                      |
| CCG012958.1 | 1482 | 82   | 333 | 2.37754267 | 7.854997412 | 1.724139566  | Up   | 0         | 0         | Putative uncharacterized protein<br>OS=Culex quinquefasciatus<br>GN=CpipJ_CPIJ003369 PE=4<br>SV=1 |
| CCG004941.1 | 1929 | 82   | 333 | 1.82660354 | 6.034788059 | 1.724139566  | Up   | 0         | 0         | AAEL013943-PB (Fragment)<br>OS=Aedes aegypti<br>GN=AAEL013943 PE=4 SV=1                           |
| CCG013289.1 | 1161 | 95   | 333 | 3.51604202 | 10.02679256 | 1.511835963  | Up   | 0         | 0         | AAEL011356-PA OS=Aedes<br>aegypti GN=AAEL011356 PE=4<br>SV=1                                      |
| CCG028064.1 | 1338 | 98   | 333 | 3.14726008 | 8.7003783   | 1.466981727  | Up   | 0         | 0         | AAEL000905-PA (Fragment)<br>OS=Aedes aegypti<br>GN=AAEL000905 PE=4 SV=2                           |
| CCG014697.1 | 987  | 663  | 333 | 28.8641682 | 11.7944338  | -1.291173489 | Down | 3.18E-43  | 1.44E-42  | AAEL010337-PB OS=Aedes<br>aegypti GN=AAEL010337 PE=4<br>SV=1                                      |
| CCG028152.1 | 1308 | 1053 | 333 | 34.5926075 | 8.899928261 | -1.95859815  | Down | 6.41E-123 | 3.53E-122 | AAEL012888-PA (Fragment)<br>OS=Aedes aegypti<br>GN=AAEL012888 PE=4 SV=1                           |
| CCG018029.3 | 3213 | 1284 | 333 | 17.1718454 | 3.623126724 | -2.244737916 | Down | 3.55E-178 | 2.08E-177 | Putative uncharacterized protein<br>OS=Culex quinquefasciatus<br>GN=CpipJ_CPIJ000250 PE=4<br>SV=1 |

|             |      |      |     |            |             |              |      |           |           |                                                                         |
|-------------|------|------|-----|------------|-------------|--------------|------|-----------|-----------|-------------------------------------------------------------------------|
| CCG015355.1 | 2037 | 1387 | 333 | 29.2582336 | 5.714828751 | -2.356060501 | Down | 4.32E-204 | 2.59E-203 | AAEL011280-PA (Fragment)<br>OS=Aedes aegypti<br>GN=AAEL011280 PE=3 SV=1 |
| CCG011394.1 | 516  | 1569 | 333 | 130.657972 | 22.56028327 | -2.533938066 | Down | 2.11E-251 | 1.30E-250 | AAEL000663-PA OS=Aedes<br>aegypti GN=AAEL000663 PE=4<br>SV=1            |
| CCG012576.1 | 975  | 1632 | 333 | 71.924725  | 11.93959607 | -2.590733771 | Down | 3.59E-268 | 2.23E-267 | AAEL014452-PA OS=Aedes<br>aegypti GN=AAEL014452 PE=3<br>SV=1            |
| CCG027729.1 | 1565 | 30   | 334 | 0.82370098 | 7.460744052 | 3.179126901  | Up   | 3.71E-13  | 9.94E-13  | AAEL013254-PA OS=Aedes<br>aegypti GN=AAEL013254 PE=4<br>SV=1            |
| CCG023102.1 | 1104 | 31   | 334 | 1.20657769 | 10.57614533 | 3.131821186  | Up   | 2.40E-13  | 6.78E-13  | AAEL001472-PA OS=Aedes<br>aegypti GN=AAEL001472 PE=3<br>SV=1            |
| CCG009886.1 | 2520 | 54   | 334 | 0.92078003 | 4.633358906 | 2.331129994  | Up   | 0         | 0         | AAEL000491-PA OS=Aedes<br>aegypti GN=AAEL006491 PE=4<br>SV=1            |
| CCG005917.1 | 2325 | 82   | 334 | 1.51549172 | 5.021963201 | 1.728465492  | Up   | 0         | 0         | AAEL014992-PA (Fragment)<br>OS=Aedes aegypti<br>GN=AAEL014992 PE=4 SV=1 |
| CCG007524.1 | 993  | 84   | 334 | 3.63490202 | 11.75837305 | 1.693700074  | Up   | 0         | 0         | AAEL000290-PA OS=Aedes<br>aegypti GN=AAEL000290 PE=4<br>SV=1            |
| CCG014902.1 | 961  | 1462 | 334 | 65.37123   | 12.14991097 | -2.4277101   | Down | 6.75E-223 | 4.09E-222 | AAEL012764-PA OS=Aedes<br>aegypti GN=AAEL012764 PE=3<br>SV=1            |
| CCG017410.1 | 957  | 6    | 335 | 0.26940272 | 12.23722332 | 5.505367988  | Up   | 8.38E-06  | 1.47E-05  | -                                                                       |
| CCG024207.1 | 643  | 9    | 335 | 0.60144263 | 18.2130991  | 4.920405488  | Up   | 1.09E-06  | 2.01E-06  | AAEL010085-PA OS=Aedes<br>aegypti GN=AAEL010085 PE=4<br>SV=1            |
| CCG002550.1 | 1077 | 37   | 335 | 1.47621187 | 10.8737444  | 2.880877124  | Up   | 5.17E-14  | 1.74E-13  | AAEL006788-PA (Fragment)<br>OS=Aedes aegypti<br>GN=AAEL006788 PE=2 SV=1 |
| CCG019865.1 | 367  | 56   | 335 | 6.55668975 | 31.91014365 | 2.282975567  | Up   | 0         | 0         | AAEL003435-PA OS=Aedes<br>aegypti GN=AAEL003435 PE=4<br>SV=1            |
| CCG008858.1 | 1044 | 101  | 335 | 4.15703371 | 11.21745471 | 1.432119006  | Up   | 0         | 0         | AAEL008416-PA OS=Aedes<br>aegypti GN=AAEL008416 PE=4<br>SV=1            |
| CCG015317.1 | 3168 | 128  | 335 | 1.73615089 | 3.696661212 | 1.090330489  | Up   | 6.93E-14  | 2.26E-13  | AAEL009926-PA OS=Aedes<br>aegypti GN=AAEL009926 PE=4<br>SV=1            |
| CCG026662.1 | 1371 | 135  | 335 | 4.23115549 | 8.541956761 | 1.013514892  | Up   | 9.52E-13  | 2.36E-12  | Undn OS=Culex<br>quinquefasciatus<br>GN=Cuq11_CUL002280 PE=4            |

|             |      |      |     |            |             |              |      |          |          |                                                                                                   |
|-------------|------|------|-----|------------|-------------|--------------|------|----------|----------|---------------------------------------------------------------------------------------------------|
| CCG013364.1 | 3114 | 639  | 335 | 8.81748889 | 3.760765163 | -1.229341632 | Down | 9.65E-39 | 4.28E-38 | Angiotensin-converting enzyme<br>OS=Culex quinquefasciatus<br>GN=CpipJ_CPIJ004086 PE=4<br>SV=1    |
| CCG025981.1 | 2037 | 86   | 336 | 1.81413705 | 5.766313694 | 1.668365872  | Up   | 0        | 0        | AAEL001966-PA OS=Aedes<br>aegypti GN=AAEL001966 PE=4<br>SV=1                                      |
| CCG021038.1 | 579  | 98   | 336 | 7.27294299 | 20.28666839 | 1.479920782  | Up   | 0        | 0        | AAEL002008-PA (Fragment)<br>OS=Aedes aegypti<br>GN=AAEL002008 PE=4 SV=1                           |
| CCG021520.1 | 492  | 99   | 336 | 8.64634904 | 23.87394511 | 1.465274007  | Up   | 0        | 0        | AAEL005355-PA OS=Aedes<br>aegypti GN=AAEL005355 PE=4<br>SV=1                                      |
| CCG016368.1 | 3810 | 5054 | 336 | 56.9997477 | 3.082934644 | -4.208579322 | Down | 0        | 0        | AAEL013228-PA (Fragment)<br>OS=Aedes aegypti<br>GN=AAEL013228 PE=4 SV=1                           |
| CCG004458.1 | 1743 | 26   | 337 | 0.64097137 | 6.759001304 | 3.398478267  | Up   | 4.60E-12 | 1.05E-11 | Putative uncharacterized protein<br>OS=Culex quinquefasciatus<br>GN=CpipJ_CPIJ000812 PE=4<br>SV=1 |
| CCG010505.1 | 2151 | 44   | 337 | 0.87897179 | 5.476959215 | 2.639486366  | Up   | 3.91E-14 | 1.34E-13 | AAEL009531-PA OS=Aedes<br>aegypti GN=AAEL009531 PE=4<br>SV=1                                      |
| CCG004806.1 | 770  | 90   | 337 | 5.02243651 | 15.29992113 | 1.607064889  | Up   | 0        | 0        | AAEL014183-PA OS=Aedes<br>aegypti GN=AAEL014183 PE=4<br>SV=1                                      |
| CCG019961.1 | 870  | 132  | 337 | 6.51954594 | 13.54130951 | 1.054523866  | Up   | 2.58E-13 | 7.23E-13 | AAEL011912-PA OS=Aedes<br>aegypti GN=AAEL011912 PE=2<br>SV=1                                      |
| CCG021265.1 | 1818 | 832  | 337 | 19.664917  | 6.480164616 | -1.601521733 | Down | 6.68E-74 | 3.35E-73 | AAEL006216-PA OS=Aedes<br>aegypti GN=AAEL006216 PE=4<br>SV=1                                      |
| CCG012583.1 | 1611 | 44   | 338 | 1.17359921 | 7.334511204 | 2.643761021  | Up   | 3.91E-14 | 1.35E-13 | AAEL003657-PA OS=Aedes<br>aegypti GN=AAEL003657 PE=4<br>SV=1                                      |
| CCG022674.1 | 1035 | 55   | 338 | 2.28341585 | 11.41632613 | 2.321832927  | Up   | 0        | 0        | Cytosine-specific<br>methyltransferase OS=Aedes<br>aegypti GN=AAEL006166 PE=3<br>SV=1             |
| CCG020842.1 | 1360 | 65   | 338 | 2.05370055 | 8.688159963 | 2.080824827  | Up   | 0        | 0        | AAEL002069-PA OS=Aedes<br>aegypti GN=AAEL002069 PE=4<br>SV=1                                      |
| CCG019978.1 | 1449 | 82   | 338 | 2.43168961 | 8.154518667 | 1.745640635  | Up   | 0        | 0        | AAEL013478-PA OS=Aedes<br>aegypti GN=AAEL013478 PE=4<br>SV=1                                      |
| CCG007644.1 | 234  | 114  | 338 | 20.9339733 | 50.49528867 | 1.270302626  | Up   | 8.48E-14 | 2.70E-13 | AAEL001247-PA OS=Aedes<br>aegypti GN=AAEL001247 PE=4<br>SV=1                                      |



|             |      |      |     |            |             |              |      |           |           |                                                                                          |
|-------------|------|------|-----|------------|-------------|--------------|------|-----------|-----------|------------------------------------------------------------------------------------------|
| CCG022291.1 | 600  | 137  | 338 | 9.81142274 | 19.69316258 | 1.005160557  | Up   | 1.15E-12  | 2.81E-12  | AAEL009140-PA OS=Aedes aegypti GN=AAEL009140 PE=4 SV=1                                   |
| CCG005692.2 | 195  | 620  | 338 | 136.62172  | 60.59434641 | -1.172931765 | Down | 4.83E-35  | 2.09E-34  | AAEL002081-PA OS=Aedes aegypti GN=AAEL002081 PE=4 SV=1                                   |
| CCG024918.1 | 1962 | 656  | 338 | 14.3670468 | 6.022373878 | -1.254359365 | Down | 5.85E-41  | 2.62E-40  | AAEL006778-PA (Fragment) OS=Aedes aegypti GN=GPRFZ2 PE=4 SV=2                            |
| CCG016030.1 | 894  | 42   | 339 | 2.01871236 | 13.25599086 | 2.715137244  | Up   | 7.66E-14  | 2.47E-13  | AAEL015062-PA OS=Aedes aegypti GN=AAEL015062 PE=4 SV=1                                   |
| CCG009496.1 | 972  | 52   | 339 | 2.29879239 | 12.1922385  | 2.407014949  | Up   | 0         | 0         | AAEL001185-PA OS=Aedes aegypti GN=AAEL001185 PE=4 SV=1                                   |
| CCG005145.1 | 1895 | 84   | 339 | 1.90472702 | 6.253749776 | 1.715137244  | Up   | 0         | 0         | Putative uncharacterized protein OS=Culex quinquefasciatus GN=CpipJ_CPIJ012958 PE=4 SV=1 |
| CCG018552.1 | 965  | 120  | 339 | 5.34338669 | 12.28067961 | 1.200564071  | Up   | 0         | 0         | Putative uncharacterized protein OS=Aedes aegypti PE=2 SV=1                              |
| CCG019768.1 | 1872 | 584  | 339 | 13.4050881 | 6.330585377 | -1.082369892 | Down | 2.90E-29  | 1.22E-28  | AAEL005491-PA OS=Aedes aegypti GN=AAEL005491 PE=3 SV=1                                   |
| CCG014293.1 | 1339 | 823  | 339 | 26.4108227 | 8.850527129 | -1.577293953 | Down | 1.52E-71  | 7.58E-71  | AAEL012021-PA OS=Aedes aegypti GN=AAEL012021 PE=4 SV=1                                   |
| CCG025187.1 | 1245 | 20   | 340 | 0.69027686 | 9.546838637 | 3.789776045  | Up   | 3.69E-10  | 7.71E-10  | -                                                                                        |
| CCG013487.1 | 1455 | 74   | 340 | 2.18540231 | 8.1689444   | 1.902250774  | Up   | 0         | 0         | AAEL014654-PA OS=Aedes aegypti GN=AAEL014654 PE=4 SV=1                                   |
| CCG001368.1 | 823  | 85   | 340 | 4.43794343 | 14.44205845 | 1.702313204  | Up   | 0         | 0         | AAEL004276-PA OS=Aedes aegypti GN=AAEL004276 PE=4 SV=1                                   |
| CCG004749.1 | 1383 | 108  | 340 | 3.35555411 | 8.594225671 | 1.356816638  | Up   | 0         | 0         | AAEL009798-PA OS=Aedes aegypti GN=AAEL009798 PE=4 SV=1                                   |
| CCG022100.1 | 1488 | 658  | 340 | 19.0014015 | 7.987778295 | -1.250239634 | Down | 7.11E-41  | 3.19E-40  | AAEL007773-PA OS=Aedes aegypti GN=AAEL007773 PE=4 SV=1                                   |
| CCG021933.1 | 625  | 1076 | 340 | 73.9766951 | 19.01730256 | -1.959758223 | Down | 1.16E-125 | 6.41E-125 | AAEL000467-PA OS=Aedes aegypti GN=AAEL000467 PE=2 SV=1                                   |
| CCG008561.1 | 1954 | 43   | 341 | 0.94559805 | 6.100702344 | 2.689676378  | Up   | 8.46E-14  | 2.70E-13  | AAEL003672-PA OS=Aedes aegypti GN=AAEL003672 PE=4 SV=1                                   |
| CCG016228.1 | 501  | 63   | 341 | 5.4033798  | 23.79395685 | 2.138661209  | Up   | 0         | 0         | AAEL004879-PA OS=Aedes aegypti GN=AAEL004879 PE=4 SV=1                                   |

|             |      |      |     |            |             |              |      |           |           |                                                                             |
|-------------|------|------|-----|------------|-------------|--------------|------|-----------|-----------|-----------------------------------------------------------------------------|
| CCG007263.1 | 1071 | 73   | 341 | 2.92884279 | 11.13050642 | 1.926116574  | Up   | 0         | 0         | AAEL012418-PA OS=Aedes aegypti GN=AAEL012418 PE=4 SV=1                      |
| CCG021643.1 | 666  | 81   | 341 | 5.2260488  | 17.89905763 | 1.77609113   | Up   | 4.46E-14  | 1.51E-13  | AAEL003678-PA OS=Aedes aegypti GN=AAEL003678 PE=3 SV=1                      |
| CCG025055.1 | 699  | 91   | 341 | 5.59405701 | 17.05403774 | 1.608146493  | Up   | 0         | 0         | AAEL005586-PA OS=Aedes aegypti GN=AAEL005586 PE=4 SV=1                      |
| CCG026495.1 | 1059 | 718  | 341 | 29.1333989 | 11.25663114 | -1.371898901 | Down | 4.20E-51  | 1.97E-50  | AAEL011597-PA OS=Aedes aegypti GN=AAEL011597 PE=4 SV=1                      |
| CCG027472.1 | 670  | 1255 | 341 | 80.488085  | 17.79219758 | -2.177530516 | Down | 1.11E-167 | 6.44E-167 | AAEL008490-PA OS=Aedes aegypti GN=AAEL008490 PE=4 SV=1                      |
| CCG015538.1 | 2777 | 8    | 342 | 0.1237875  | 4.305268511 | 5.120165719  | Up   | 2.19E-06  | 3.96E-06  | AGAP001039-PB OS=Anopheles gambiae GN=AgaP_AGAP001039 PE=3 SV=1             |
| CCG002364.1 | 1250 | 12   | 342 | 0.41250945 | 9.564584525 | 4.535203218  | Up   | 1.30E-07  | 2.49E-07  | AAEL006080-PA OS=Aedes aegypti GN=AAEL006080 PE=3 SV=1                      |
| CCG022032.1 | 615  | 17   | 342 | 1.18778128 | 19.44021245 | 4.032702877  | Up   | 3.39E-09  | 6.88E-09  | AAEL004861-PA OS=Aedes aegypti GN=AAEL004861 PE=4 SV=1                      |
| CCG007522.1 | 1257 | 25   | 342 | 0.85460888 | 9.511321127 | 3.476309529  | Up   | 9.32E-12  | 2.08E-11  | AAEL000287-PA (Fragment) OS=Aedes aegypti GN=AAEL000287 PE=4 SV=1           |
| CCG010791.1 | 759  | 42   | 342 | 2.37777188 | 15.7519508  | 2.727848296  | Up   | 7.66E-14  | 2.47E-13  | AAEL006747-PA OS=Aedes aegypti GN=AAEL006747 PE=4 SV=1                      |
| CCG001113.1 | 759  | 54   | 342 | 3.05713527 | 15.7519508  | 2.365278217  | Up   | 0         | 0         | AAEL000865-PA OS=Aedes aegypti GN=AAEL000865 PE=4 SV=1                      |
| CCG012685.1 | 906  | 74   | 342 | 3.50966927 | 13.1961707  | 1.910712353  | Up   | 0         | 0         | AAEL002179-PA OS=Aedes aegypti GN=AAEL002179 PE=4 SV=1                      |
| CCG005766.1 | 693  | 28   | 343 | 1.73615089 | 17.30258143 | 3.317023048  | Up   | 1.17E-12  | 2.86E-12  | AAEL007053-PB OS=Aedes aegypti GN=AAEL007053 PE=4 SV=1                      |
| CCG016809.1 | 1788 | 49   | 343 | 1.17758221 | 6.706201864 | 2.509668126  | Up   | 0         | 0         | Zinc finger protein OS=Culex quinquefasciatus GN=CpipJ_CPIJ010644 PE=4 SV=1 |
| CCG010413.1 | 1905 | 54   | 343 | 1.21803972 | 6.294324899 | 2.369490468  | Up   | 0         | 0         | AAEL004917-PA OS=Aedes aegypti GN=AAEL004917 PE=4 SV=1                      |
| CCG010380.1 | 561  | 107  | 343 | 8.19565348 | 21.37377706 | 1.382910984  | Up   | 0         | 0         | AAEL009850-PA OS=Aedes aegypti GN=GALE14 PE=4 SV=1                          |

|             |      |      |     |            |             |              |      |          |          |                                                                                          |
|-------------|------|------|-----|------------|-------------|--------------|------|----------|----------|------------------------------------------------------------------------------------------|
| CCG018692.1 | 2663 | 123  | 343 | 1.98470798 | 4.502699562 | 1.181863465  | Up   | 0        | 0        | AAEL003974-PA OS=Aedes aegypti GN=AAEL003974 PE=4 SV=1                                   |
| CCG018943.2 | 1554 | 607  | 343 | 16.7841885 | 7.716016044 | -1.121174736 | Down | 4.78E-32 | 2.03E-31 | Cytochrome P450 CYP6N3v2 OS=Aedes albopictus PE=2 SV=1                                   |
| CCG003080.1 | 420  | 14   | 344 | 1.43232449 | 28.63249336 | 4.321223036  | Up   | 3.07E-08 | 6.01E-08 | -                                                                                        |
| CCG023734.1 | 829  | 71   | 344 | 3.68015821 | 14.50620894 | 1.978830839  | Up   | 0        | 0        | Alkaline phosphatase OS=Aedes aegypti GN=AAEL003298 PE=3 SV=1                            |
| CCG001483.1 | 966  | 105  | 344 | 4.67062333 | 12.44891015 | 1.414332441  | Up   | 0        | 0        | Conserved membrane protein OS=Aedes aegypti PE=2 SV=1                                    |
| CCG027252.1 | 1260 | 116  | 344 | 3.95594382 | 9.544164452 | 1.270596963  | Up   | 1.16E-13 | 3.58E-13 | AAEL013825-PA OS=Aedes aegypti GN=AAEL013825 PE=4 SV=1                                   |
| CCG028518.1 | 708  | 744  | 344 | 45.1546364 | 16.98537741 | -1.410580853 | Down | 4.06E-55 | 1.93E-54 | AAEL006131-PA OS=Aedes aegypti GN=AAEL006131 PE=4 SV=1                                   |
| CCG019278.1 | 777  | 5    | 345 | 0.27651052 | 15.52201478 | 5.810837661  | Up   | 1.59E-05 | 2.76E-05 | AAEL011383-PA OS=Aedes aegypti GN=AAEL011383 PE=4 SV=1                                   |
| CCG015233.1 | 1914 | 70   | 345 | 1.57151589 | 6.301256785 | 2.003482739  | Up   | 0        | 0        | AAEL009262-PA OS=Aedes aegypti GN=AAEL009262 PE=4 SV=1                                   |
| CCG002374.1 | 669  | 72   | 345 | 4.62454543 | 18.02781089 | 1.962840754  | Up   | 0        | 0        | AAEL014052-PA OS=Aedes aegypti GN=AAEL014052 PE=4 SV=1                                   |
| CCG012530.4 | 2316 | 9883 | 345 | 183.363509 | 5.207515322 | -5.13796757  | Down | 0        | 0        | Putative uncharacterized protein OS=Culex quinquefasciatus GN=CpipJ_CPIJ008688 PE=4 SV=1 |
| CCG016272.1 | 2004 | 5    | 346 | 0.10720992 | 6.035710461 | 5.815013337  | Up   | 1.59E-05 | 2.76E-05 | AAEL004909-PA OS=Aedes aegypti GN=AAEL004909 PE=4 SV=1                                   |
| CCG026622.1 | 1071 | 12   | 346 | 0.48145361 | 11.29371033 | 4.551978931  | Up   | 1.30E-07 | 2.49E-07 | AAEL004943-PA OS=Aedes aegypti GN=AAEL004943 PE=4 SV=1                                   |
| CCG020339.1 | 1254 | 23   | 346 | 0.78812113 | 9.645585138 | 3.613379475  | Up   | 4.01E-11 | 8.67E-11 | AAEL014744-PA OS=Aedes aegypti GN=AAEL014744 PE=4 SV=1                                   |
| CCG002422.1 | 1896 | 28   | 346 | 0.63457414 | 6.379516753 | 3.329586509  | Up   | 1.17E-12 | 2.85E-12 | AAEL009031-PA OS=Aedes aegypti GN=AAEL009031 PE=4 SV=1                                   |
| CCG012945.1 | 1829 | 47   | 346 | 1.10419766 | 6.613211462 | 2.58235258   | Up   | 0        | 0        | AAEL008643-PA OS=Aedes aegypti GN=AAEL008643 PE=4 SV=1                                   |

|             |      |      |     |            |             |              |      |          |          |                                                                               |
|-------------|------|------|-----|------------|-------------|--------------|------|----------|----------|-------------------------------------------------------------------------------|
| CCG023126.1 | 1467 | 54   | 346 | 1.58170802 | 8.245101406 | 2.382053929  | Up   | 0        | 0        | Serine/threonine-protein kinase RIO1 OS=Aedes aegypti GN=AAEL011857 PE=3 SV=1 |
| CCG014620.1 | 912  | 65   | 346 | 3.06253591 | 13.26267956 | 2.114573618  | Up   | 0        | 0        | AAEL005840-PA OS=Aedes aegypti GN=AAEL005846 PE=4 SV=1                        |
| CCG016866.1 | 3342 | 73   | 346 | 0.93859684 | 3.619259055 | 1.947116873  | Up   | 0        | 0        | AAEL009289-PA OS=Aedes aegypti GN=AAEL009289 PE=4 SV=1                        |
| CCG000308.1 | 5385 | 105  | 346 | 0.83784998 | 2.246158545 | 1.422695914  | Up   | 0        | 0        | AAEL012462-PA OS=Aedes aegypti GN=AAEL012462 PE=4 SV=1                        |
| CCG016306.1 | 1018 | 126  | 346 | 5.31845438 | 11.88169328 | 1.159661508  | Up   | 1.34E-13 | 4.06E-13 | AAEL006010-PA OS=Aedes aegypti GN=AAEL006010 PE=4 SV=1                        |
| CCG010798.1 | 659  | 140  | 346 | 9.12862344 | 18.35442149 | 1.007658415  | Up   | 4.03E-13 | 1.07E-12 | AAEL007825-PA OS=Aedes aegypti GN=AAEL007825 PE=4 SV=1                        |
| CCG013959.1 | 675  | 714  | 346 | 45.4524304 | 17.91935372 | -1.342838833 | Down | 3.12E-49 | 1.45E-48 | AAEL001946-PA OS=Aedes aegypti GN=AAEL001946 PE=4 SV=1                        |
| CCG009996.1 | 1476 | 2573 | 346 | 74.9059127 | 8.194826398 | -3.19229431  | Down | 0        | 0        | AAEL004440-PA OS=Aedes aegypti GN=AAEL004440 PE=4 SV=1                        |
| CCG016497.1 | 410  | 7    | 347 | 0.73362962 | 29.58663912 | 5.333750134  | Up   | 4.31E-06 | 7.71E-06 | AAEL005153-PA OS=Aedes aegypti GN=AAEL005153 PE=4 SV=1                        |
| CCG009342.1 | 1011 | 14   | 347 | 0.59503094 | 11.99853812 | 4.333750134  | Up   | 3.07E-08 | 6.00E-08 | AAEL003107-PA OS=Aedes aegypti GN=AAEL003107 PE=4 SV=1                        |
| CCG019473.1 | 902  | 25   | 347 | 1.19095717 | 13.44847233 | 3.497248867  | Up   | 9.32E-12 | 2.08E-11 | AAEL012372-PA OS=Aedes aegypti GN=AAEL012372 PE=4 SV=1                        |
| CCG006456.1 | 1107 | 39   | 347 | 1.51383889 | 10.95801449 | 2.855702838  | Up   | 7.33E-14 | 2.38E-13 | AAEL000278-PA (Fragment) OS=Aedes aegypti GN=AAEL000278 PE=3 SV=1             |
| CCG027503.1 | 1269 | 53   | 347 | 1.79463825 | 9.559119023 | 2.413184602  | Up   | 0        | 0        | AAEL010770-PA OS=Aedes aegypti GN=AAEL010770 PE=4 SV=1                        |
| CCG020473.1 | 1199 | 80   | 347 | 2.86703817 | 10.11719937 | 1.819176962  | Up   | 0        | 0        | AAEL001407-PA OS=Aedes aegypti GN=AAEL001407 PE=4 SV=1                        |
| CCG025841.1 | 705  | 109  | 347 | 6.64354762 | 17.20641424 | 1.372920732  | Up   | 0        | 0        | Hypothetical conserved protein OS=Aedes aegypti PE=2 SV=1                     |
| CCG008384.1 | 2436 | 119  | 347 | 2.09909623 | 4.979688851 | 1.246287293  | Up   | 0        | 0        | AAEL005402-PA OS=Aedes aegypti GN=AAEL005402 PE=4 SV=1                        |

|             |      |      |     |            |             |              |      |           |           |                                                                       |
|-------------|------|------|-----|------------|-------------|--------------|------|-----------|-----------|-----------------------------------------------------------------------|
| CCG001821.1 | 787  | 17   | 348 | 0.92818995 | 15.4580436  | 4.057793858  | Up   | 3.39E-09  | 6.89E-09  | AAEL002905-PA OS=Aedes aegypti GN=AAEL002905 PE=4 SV=1                |
| CCG004516.1 | 780  | 31   | 348 | 1.7077715  | 15.59676964 | 3.191060389  | Up   | 2.40E-13  | 6.76E-13  | AAEL001684-PA OS=Aedes aegypti GN=AAEL001684 PE=4 SV=1                |
| CCG026989.1 | 3828 | 57   | 348 | 0.63983147 | 3.178025161 | 2.312366686  | Up   | 0         | 0         | AAEL010355-PA OS=Aedes aegypti GN=AAEL010355 PE=4 SV=1                |
| CCG003112.1 | 905  | 76   | 348 | 3.6085081  | 13.44251969 | 1.897329186  | Up   | 0         | 0         | AAEL008755-PA OS=Aedes aegypti GN=AAEL008755 PE=4 SV=1                |
| CCG017680.1 | 1833 | 78   | 348 | 1.82849935 | 6.63692325  | 1.859854481  | Up   | 0         | 0         | AAEL006640-PA OS=Aedes aegypti GN=AAEL006640 PE=3 SV=1                |
| CCG011839.1 | 1698 | 106  | 348 | 2.68244515 | 7.164593826 | 1.417336245  | Up   | 0         | 0         | AAEL004868-PA OS=Aedes aegypti GN=AAEL004868 PE=4 SV=1                |
| CCG010957.1 | 2115 | 126  | 348 | 2.55989908 | 5.75200015  | 1.167976776  | Up   | 1.34E-13  | 4.06E-13  | AGAP009971-PA (Fragment) OS=Anopheles gambiae GN=AGAP009971 PE=3 SV=3 |
| CCG007577.1 | 2527 | 131  | 348 | 2.22755648 | 4.81419878  | 1.111833698  | Up   | 1.29E-13  | 3.96E-13  | AAEL007729-PA OS=Aedes aegypti GN=AAEL007729 PE=4 SV=1                |
| CCG013708.1 | 1566 | 605  | 348 | 16.6006957 | 7.768505949 | -1.095534632 | Down | 7.91E-31  | 3.35E-30  | AAEL000714-PA OS=Aedes aegypti GN=AAEL000714 PE=4 SV=1                |
| CCG012327.1 | 923  | 819  | 348 | 38.1280744 | 13.18036871 | -1.532462942 | Down | 2.64E-68  | 1.30E-67  | AAEL000692-PA OS=Aedes aegypti GN=AAEL000692 PE=4 SV=1                |
| CCG019888.1 | 2049 | 1596 | 348 | 33.4698372 | 5.937276875 | -2.494988237 | Down | 4.03E-251 | 2.48E-250 | AAEL014457-PA (Fragment) OS=Aedes aegypti GN=AAEL014457 PE=4 SV=1     |
| CCG014681.1 | 1476 | 28   | 349 | 0.81514402 | 8.265879806 | 3.342041508  | Up   | 1.17E-12  | 2.85E-12  | AAEL000699-PA OS=Aedes aegypti GN=AAEL000699 PE=4 SV=1                |
| CCG005346.1 | 1917 | 41   | 349 | 0.91901884 | 6.364339381 | 2.791844425  | Up   | 1.02E-13  | 3.19E-13  | AAEL010136-PA OS=Aedes aegypti GN=AAEL010136 PE=4 SV=1                |
| CCG012270.2 | 691  | 48   | 349 | 2.98487303 | 17.65620636 | 2.564433929  | Up   | 5.35E-14  | 1.79E-13  | AAEL010182-PA OS=Aedes aegypti GN=AAEL010182 PE=4 SV=1                |
| CCG014733.1 | 834  | 876  | 349 | 45.1336781 | 14.62882325 | -1.62539063  | Down | 2.27E-79  | 1.15E-78  | AAEL001031-PA OS=Aedes aegypti GN=AAEL001031 PE=3 SV=1                |
| CCG025057.1 | 714  | 83   | 350 | 4.99508119 | 17.13641018 | 1.778484884  | Up   | 1.32E-13  | 4.02E-13  | Dacapo OS=Aedes albopictus PE=2 SV=1                                  |

|             |      |      |     |            |             |              |      |           |           |                                                                                          |
|-------------|------|------|-----|------------|-------------|--------------|------|-----------|-----------|------------------------------------------------------------------------------------------|
| CCG027685.1 | 591  | 8635 | 350 | 627.823449 | 20.70287118 | -4.922456147 | Down | 0         | 0         | AAEL009707-PA OS=Aedes aegypti GN=AAEL009707 PE=4 SV=1                                   |
| CCG025257.1 | 1843 | 40   | 351 | 0.93260412 | 6.657816141 | 2.835712329  | Up   | 6.86E-14  | 2.25E-13  | AAEL007461-PA OS=Aedes aegypti GN=AAEL007461 PE=4 SV=1                                   |
| CCG013852.1 | 810  | 85   | 351 | 4.50916968 | 15.1485866  | 1.748249488  | Up   | 0         | 0         | AAEL001664-PA OS=Aedes aegypti GN=AAEL001664 PE=4 SV=1                                   |
| CCG006132.1 | 2694 | 919  | 351 | 14.6581983 | 4.55469753  | -1.686280627 | Down | 1.27E-87  | 6.59E-87  | AAEL003472-PA OS=Aedes aegypti GN=AAEL003472 PE=4 SV=1                                   |
| CCG009528.1 | 2076 | 1559 | 351 | 32.2686976 | 5.910575697 | -2.448764789 | Down | 5.30E-240 | 3.25E-239 | AAEL011436-PA OS=Aedes aegypti GN=AAEL011436 PE=4 SV=1                                   |
| CCG014821.1 | 348  | 11   | 352 | 1.35823874 | 35.36009605 | 4.702313204  | Up   | 2.67E-07  | 5.03E-07  | AAEL007291-PA OS=Aedes aegypti GN=AAEL007291 PE=4 SV=1                                   |
| CCG004295.1 | 1476 | 49   | 352 | 1.42650203 | 8.336933214 | 2.547034978  | Up   | 0         | 0         | AAEL001359-PA OS=Aedes aegypti GN=AAEL001359 PE=4 SV=1                                   |
| CCG009428.1 | 2319 | 86   | 352 | 1.59353048 | 5.306301606 | 1.735480068  | Up   | 0         | 0         | Putative uncharacterized protein OS=Culex quinquefasciatus GN=CpipJ_CPIJ007254 PE=4 SV=1 |
| CCG017981.1 | 969  | 2038 | 352 | 90.3739104 | 12.69898186 | -2.831193514 | Down | 0         | 0         | AAEL004118-PA OS=Aedes aegypti GN=AAEL004118 PE=4 SV=1                                   |
| CCG010905.1 | 442  | 0    | 353 | 0.001      | 27.91916674 | 14.76896826  | Up   | 4.44E-16  | 1.64E-15  | Predicted protein OS=Nematostella vectensis GN=v1g229551 PE=3 SV=1                       |
| CCG027194.1 | 1626 | 53   | 353 | 1.40061251 | 7.589342989 | 2.437917123  | Up   | 0         | 0         | AAEL003657-PA OS=Aedes aegypti GN=AAEL003657 PE=4 SV=1                                   |
| CCG022161.1 | 2090 | 60   | 353 | 1.2335809  | 5.90443622  | 2.258946981  | Up   | 0         | 0         | AAEL013550-PA OS=Aedes aegypti GN=AAEL013550 PE=4 SV=1                                   |
| CCG026192.1 | 1464 | 67   | 353 | 1.96651108 | 8.429147336 | 2.099748387  | Up   | 0         | 0         | AAEL014112-PA OS=Aedes aegypti GN=AAEL014112 PE=4 SV=1                                   |
| CCG003173.1 | 618  | 79   | 353 | 5.49289488 | 19.96807719 | 1.862056829  | Up   | 0         | 0         | AAEL002898-PA OS=Aedes aegypti GN=AAEL002898 PE=3 SV=1                                   |
| CCG011833.1 | 2184 | 79   | 353 | 1.55430817 | 5.650307555 | 1.862056829  | Up   | 0         | 0         | AAEL004889-PA OS=Aedes aegypti GN=AAEL004889 PE=4 SV=1                                   |
| CCG001456.1 | 623  | 79   | 353 | 5.44881065 | 19.80781974 | 1.862056829  | Up   | 0         | 0         | AAEL008355-PA OS=Aedes aegypti GN=AAEL008355 PE=4 SV=1                                   |

|             |      |      |     |            |             |              |      |          |          |                                                                                          |
|-------------|------|------|-----|------------|-------------|--------------|------|----------|----------|------------------------------------------------------------------------------------------|
| CCG009425.1 | 927  | 91   | 353 | 4.21817244 | 13.31205146 | 1.658042937  | Up   | 0        | 0        | AAEL008120-PA OS=Aedes aegypti GN=AAEL008120 PE=3 SV=1                                   |
| CCG020686.1 | 927  | 130  | 353 | 6.02596063 | 13.31205146 | 1.143469764  | Up   | 0        | 0        | AGAP008088-PA OS=Anopheles gambiae GN=AGAP008088 PE=4 SV=4                               |
| CCG010137.1 | 477  | 0    | 354 | 0.001      | 25.94387836 | 14.66310654  | Up   | 4.44E-16 | 1.64E-15 | Histone H2B OS=Aedes aegypti GN=AAEL015674 PE=3 SV=1                                     |
| CCG002165.1 | 960  | 43   | 354 | 1.92468603 | 12.89086456 | 2.743653999  | Up   | 8.46E-14 | 2.70E-13 | Putative uncharacterized protein OS=Culex quinquefasciatus GN=CpipJ_CPIJ013990 PE=4 SV=1 |
| CCG011281.1 | 873  | 47   | 354 | 2.31337632 | 14.17552117 | 2.615329902  | Up   | 0        | 0        | AAEL003342-PA OS=Aedes aegypti GN=AAEL003342 PE=4 SV=1                                   |
| CCG009068.1 | 2175 | 85   | 354 | 1.67927698 | 5.689760909 | 1.760527818  | Up   | 0        | 0        | AAEL007630-PA OS=Aedes aegypti GN=AAEL007630 PE=4 SV=1                                   |
| CCG009327.1 | 1344 | 130  | 354 | 4.15629873 | 9.2077604   | 1.147550941  | Up   | 0        | 0        | AAEL003964-PA OS=Aedes aegypti GN=AAEL003964 PE=4 SV=1                                   |
| CCG023009.1 | 3257 | 661  | 354 | 8.72060012 | 3.799579361 | -1.198587708 | Down | 1.68E-38 | 7.43E-38 | AAEL001431-PA OS=Aedes aegypti GN=AAEL001431 PE=4 SV=1                                   |
| CCG023637.1 | 732  | 33   | 355 | 1.93716017 | 16.95380909 | 3.129594299  | Up   | 1.31E-13 | 4.02E-13 | Serehiac OS=Culex quinquefasciatus GN=CpipJ_CPIJ001564 PE=4 SV=1                         |
| CCG002237.1 | 1830 | 42   | 355 | 0.98619063 | 6.781523636 | 2.781670995  | Up   | 7.66E-14 | 2.47E-13 | AAEL009306-PA OS=Aedes aegypti GN=AAEL009306 PE=4 SV=1                                   |
| CCG016860.1 | 1956 | 49   | 355 | 1.07644018 | 6.344677022 | 2.559278574  | Up   | 0        | 0        | AAEL003660-PA OS=Aedes aegypti GN=AAEL003660 PE=4 SV=1                                   |
| CCG025983.1 | 2013 | 68   | 355 | 1.45153599 | 6.165021487 | 2.086525577  | Up   | 0        | 0        | AAEL002013-PA OS=Aedes aegypti GN=AAEL002013 PE=4 SV=1                                   |
| CCG023798.1 | 918  | 142  | 355 | 6.64673455 | 13.51872359 | 1.024241299  | Up   | 3.60E-13 | 9.69E-13 | AAEL015041-PA OS=Aedes aegypti GN=AAEL015041 PE=3 SV=1                                   |
| CCG021652.1 | 831  | 699  | 355 | 36.1442172 | 14.93404122 | -1.275160227 | Down | 1.25E-44 | 5.71E-44 | -                                                                                        |
| CCG010019.1 | 7101 | 2913 | 355 | 17.6272126 | 1.747667688 | -3.334301568 | Down | 0        | 0        | AAEL012268-PA OS=Aedes aegypti GN=AAEL012268 PE=4 SV=1                                   |
| CCG006626.1 | 972  | 45   | 356 | 1.98933957 | 12.80364869 | 2.686193538  | Up   | 0        | 0        | AAEL009399-PA OS=Aedes aegypti GN=AAEL009399 PE=4 SV=1                                   |

|             |      |     |     |            |             |              |      |          |            |                                                                      |
|-------------|------|-----|-----|------------|-------------|--------------|------|----------|------------|----------------------------------------------------------------------|
| CCG026158.1 | 939  | 47  | 356 | 2.15077479 | 13.25361718 | 2.623457783  | Up   | 0        | 0          | AAEL003839-PA OS=Aedes aegypti GN=AAEL003839 PE=4 SV=1               |
| CCG025899.1 | 846  | 52  | 356 | 2.64116572 | 14.7105751  | 2.477606917  | Up   | 0        | 0          | AAEL011069-PA OS=Aedes aegypti GN=AAEL011069 PE=4 SV=1               |
| CCG004184.1 | 913  | 99  | 356 | 4.65936881 | 13.63104768 | 1.548690015  | Up   | 0        | 0          | AAEL012525-PA OS=Aedes aegypti GN=AAEL012525 PE=4 SV=1               |
| CCG012611.1 | 1394 | 121 | 356 | 3.72979762 | 8.927651744 | 1.259183398  | Up   | 0        | 0          | AAEL007574-PA OS=Aedes aegypti GN=AAEL007574 PE=4 SV=1               |
| CCG017920.1 | 2883 | 598 | 356 | 8.91290368 | 4.316734836 | -1.045955039 | Down | 2.21E-28 | 9.24E-28   | AAEL001225-PA OS=Aedes aegypti GN=AAEL001225 PE=3 SV=1               |
| CCG026700.2 | 1210 | 703 | 356 | 24.9650607 | 10.28524507 | -1.279334244 | Down | 4.27E-45 | 1.95E-44   | AAEL013984-PA OS=Aedes aegypti GN=AAEL013984 PE=4 SV=1               |
| CCG018505.1 | 1143 | 2   | 357 | 0.07518764 | 10.91872687 | 7.182093468  | Up   | 9.36E-05 | 0.00015385 | AAEL005938-PA OS=Aedes aegypti GN=AAEL005938 PE=4 SV=1               |
| CCG004545.1 | 744  | 38  | 357 | 2.19469075 | 16.77433442 | 2.934165954  | Up   | 4.26E-14 | 1.45E-13   | -                                                                    |
| CCG026488.1 | 1953 | 71  | 357 | 1.56213577 | 6.390222636 | 2.032346348  | Up   | 0        | 0          | AAEL004950-PA OS=Aedes aegypti GN=AAEL004950 PE=4 SV=1               |
| CCG007949.1 | 1513 | 72  | 357 | 2.04482544 | 8.24858216  | 2.012168466  | Up   | 0        | 0          | AAEL003101-PA OS=Aedes aegypti GN=AAEL003101 PE=4 SV=1               |
| CCG010460.1 | 1272 | 73  | 357 | 2.46603037 | 9.811403151 | 1.992268909  | Up   | 0        | 0          | Uncharacterized protein OS=Anopheles darlingi GN=AND_22896 PE=4 SV=1 |
| CCG005847.1 | 1179 | 142 | 357 | 5.17532003 | 10.58533063 | 1.032346348  | Up   | 3.20E-13 | 8.78E-13   | AAEL003776-PA OS=Aedes aegypti GN=AAEL003776 PE=4 SV=1               |
| CCG002287.1 | 2724 | 4   | 358 | 0.063098   | 4.594369708 | 6.186128981  | Up   | 2.95E-05 | 5.04E-05   | AAEL004462-PA OS=Aedes aegypti GN=AAEL004462 PE=4 SV=1               |
| CCG012073.1 | 2616 | 55  | 358 | 0.90341567 | 4.784045522 | 2.404769268  | Up   | 0        | 0          | AAEL009438-PA OS=Aedes aegypti GN=AAEL009438 PE=4 SV=1               |
| CCG010284.1 | 4336 | 106 | 358 | 1.05045938 | 2.886315287 | 1.458208527  | Up   | 0        | 0          | AAEL014493-PA OS=Aedes aegypti GN=AAEL014493 PE=4 SV=1               |
| CCG000635.2 | 6188 | 115 | 358 | 0.79856488 | 2.022473026 | 1.34063893   | Up   | 6.13E-14 | 2.03E-13   | AAEL005723-PA OS=Aedes aegypti GN=AAEL005723 PE=4 SV=1               |
| CCG022209.1 | 2254 | 139 | 358 | 2.64986385 | 5.552379363 | 1.067187908  | Up   | 1.57E-13 | 4.66E-13   | AAEL000899-PA OS=Aedes aegypti GN=AAEL000899 PE=4 SV=1               |



|             |      |      |     |            |             |              |      |          |          |                                                                                                   |
|-------------|------|------|-----|------------|-------------|--------------|------|----------|----------|---------------------------------------------------------------------------------------------------|
| CCG006802.1 | 4467 | 663  | 358 | 6.37764362 | 2.801670715 | -1.186736079 | Down | 4.96E-38 | 2.19E-37 | AAEL012249-PA (Fragment)<br>OS=Aedes aegypti<br>GN=AAEL012249 PE=4 SV=1                           |
| CCG010818.1 | 933  | 29   | 359 | 1.33560804 | 13.45125548 | 3.332172243  | Up   | 6.66E-13 | 1.69E-12 | Putative salivary Gram negative<br>bacteria-binding protein<br>OS=Aedes albopictus PE=2 SV=1      |
| CCG013420.1 | 1785 | 38   | 359 | 0.91476186 | 7.030824292 | 2.942225724  | Up   | 4.26E-14 | 1.45E-13 | AAEL004654-PA OS=Aedes<br>aegypti GN=AAEL004654 PE=4<br>SV=1                                      |
| CCG015133.1 | 2100 | 58   | 359 | 1.18678315 | 5.976200648 | 2.332172243  | Up   | 0        | 0        | AAEL011415-PA OS=Aedes<br>aegypti GN=AAEL011415 PE=4<br>SV=1                                      |
| CCG008484.1 | 1176 | 92   | 359 | 3.36157788 | 10.67178687 | 1.666591282  | Up   | 1.44E-14 | 5.12E-14 | Putative salivary Gram negative<br>bacteria-binding protein<br>OS=Aedes albopictus PE=2 SV=1      |
| CCG023146.1 | 699  | 127  | 359 | 7.80709055 | 17.95425087 | 1.201468551  | Up   | 1.57E-13 | 4.66E-13 | AAEL008007-PA OS=Aedes<br>aegypti GN=AAEL008007 PE=4<br>SV=1                                      |
| CCG016999.1 | 942  | 137  | 359 | 6.24931384 | 13.3227403  | 1.092121155  | Up   | 2.92E-13 | 8.09E-13 | AAEL006853-PA OS=Aedes<br>aegypti GN=AAEL006853 PE=4<br>SV=1                                      |
| CCG028019.1 | 753  | 140  | 359 | 7.98906088 | 16.66669503 | 1.060870221  | Up   | 8.88E-16 | 3.24E-15 | AAEL013188-PA OS=Aedes<br>aegypti GN=AAEL013188 PE=4<br>SV=1                                      |
| CCG012139.3 | 1176 | 2048 | 359 | 74.8316467 | 10.67178687 | -2.809846762 | Down | 0        | 0        | Takeout OS=Aedes aegypti PE=2<br>SV=1                                                             |
| CCG026694.1 | 681  | 48   | 360 | 3.02870376 | 18.48014631 | 2.609203799  | Up   | 5.35E-14 | 1.80E-13 | AAEL004438-PA OS=Aedes<br>aegypti GN=AAEL004438 PE=3<br>SV=1                                      |
| CCG002139.1 | 1212 | 77   | 360 | 2.72992538 | 10.38364657 | 1.927379759  | Up   | 0        | 0        | AAEL010427-PA OS=Aedes<br>aegypti GN=AAEL010427 PE=4<br>SV=1                                      |
| CCG002792.1 | 6775 | 96   | 360 | 0.60887004 | 1.85756157  | 1.609203799  | Up   | 0        | 0        | AGAP001529-PA OS=Anopheles<br>gambiae GN=AgaP_AGAP001529<br>PE=4 SV=5                             |
| CCG012981.1 | 1299 | 940  | 360 | 31.0943422 | 9.688206034 | -1.682350646 | Down | 2.75E-89 | 1.43E-88 | Putative uncharacterized protein<br>OS=Culex quinquefasciatus<br>GN=CpipJ_CPIJ009026 PE=4<br>SV=1 |
| CCG008204.1 | 1221 | 90   | 361 | 3.16730231 | 10.33573949 | 1.706315134  | Up   | 0        | 0        | AAEL012942-PA OS=Aedes<br>aegypti GN=AAEL012942 PE=4<br>SV=1                                      |

|             |      |      |     |            |             |              |      |           |           |                                                                          |
|-------------|------|------|-----|------------|-------------|--------------|------|-----------|-----------|--------------------------------------------------------------------------|
| CCG013462.1 | 1817 | 735  | 361 | 17.3818134 | 6.945480415 | -1.323432209 | Down | 1.55E-49  | 7.23E-49  | AAEL006305-PA (Fragment)<br>OS=Aedes aegypti<br>GN=AAEL006305 PE=4 SV=1  |
| CCG003415.1 | 1650 | 1263 | 361 | 32.8913787 | 7.648447221 | -2.104470693 | Down | 1.50E-161 | 8.67E-161 | AAEL008635-PA OS=Aedes<br>aegypti GN=AAEL008635 PE=3<br>SV=1             |
| CCG028204.1 | 3018 | 1616 | 361 | 23.0083138 | 4.181556632 | -2.460043252 | Down | 4.65E-250 | 2.86E-249 | AAEL014426-PA OS=Aedes<br>aegypti GN=AAEL014426 PE=3<br>SV=1             |
| CCG027198.1 | 489  | 0    | 362 | 0.001      | 25.87913332 | 14.65950168  | Up   | 4.44E-16  | 1.64E-15  | Predicted protein<br>OS=Nematostella vectensis<br>GN=v1g229551 PE=3 SV=1 |
| CCG022985.1 | 1215 | 39   | 362 | 1.37927543 | 10.41555242 | 2.916756872  | Up   | 7.33E-14  | 2.38E-13  | AAEL014267-PA OS=Aedes<br>aegypti GN=AAEL014267 PE=4<br>SV=1             |
| CCG008180.1 | 594  | 43   | 362 | 3.11060368 | 21.30453904 | 2.775894336  | Up   | 8.46E-14  | 2.70E-13  | AAEL006290-PA OS=Aedes<br>aegypti GN=AAEL006290 PE=4<br>SV=1             |
| CCG000812.1 | 1749 | 59   | 362 | 1.44952221 | 7.235503826 | 2.319516042  | Up   | 0         | 0         | AAEL015533-PA OS=Aedes<br>aegypti GN=AAEL015533 PE=3<br>SV=1             |
| CCG003274.1 | 2468 | 78   | 362 | 1.35803861 | 5.12759165  | 1.916756872  | Up   | 0         | 0         | AI_G2 OS=Culex quinquefasciatus<br>GN=CpipJ_CPIJ015325 PE=3<br>SV=1      |
| CCG003036.1 | 465  | 114  | 362 | 10.5345156 | 27.21483052 | 1.369269077  | Up   | 8.48E-14  | 2.70E-13  | AAEL013494-PA OS=Aedes<br>aegypti GN=AAEL013494 PE=4<br>SV=1             |
| CCG020562.1 | 848  | 114  | 362 | 5.77659168 | 14.92322664 | 1.369269077  | Up   | 8.48E-14  | 2.70E-13  | AAEL007992-PA OS=Aedes<br>aegypti GN=AAEL007992 PE=3<br>SV=1             |
| CCG019801.1 | 2352 | 146  | 362 | 2.66733897 | 5.380483075 | 1.012334532  | Up   | 1.05E-13  | 3.29E-13  | AAEL007753-PA OS=Aedes<br>aegypti GN=AAEL007753 PE=4<br>SV=1             |
| CCG020112.1 | 864  | 17   | 363 | 0.84546932 | 14.68733156 | 4.118676101  | Up   | 3.39E-09  | 6.90E-09  | -                                                                        |
| CCG006610.1 | 1369 | 21   | 363 | 0.65914129 | 9.269433505 | 3.813821519  | Up   | 1.76E-10  | 3.72E-10  | AAEL014934-PA OS=Aedes<br>aegypti GN=AAEL014934 PE=4<br>SV=1             |
| CCG011205.1 | 539  | 67   | 363 | 5.34132137 | 23.54332925 | 2.140049751  | Up   | 0         | 0         | AAEL013291-PA OS=Aedes<br>aegypti GN=AAEL013291 PE=4<br>SV=1             |
| CCG028002.1 | 776  | 940  | 363 | 52.0509672 | 16.35290524 | -1.670378005 | Down | 2.16E-88  | 1.12E-87  | AAEL007489-PA OS=Aedes<br>aegypti GN=AAEL007489 PE=4<br>SV=1             |
| CCG025602.1 | 783  | 1529 | 363 | 83.9089709 | 16.20671069 | -2.37223375  | Down | 1.19E-226 | 7.25E-226 | AAEL004957-PA OS=Aedes<br>aegypti GN=AAEL004957 PE=4<br>SV=1             |
| CCG011436.1 | 490  | 2184 | 363 | 191.522246 | 25.89766218 | -2.886618199 | Down | 0         | 0         | AAEL000958-PA OS=Aedes<br>aegypti GN=AAEL000958 PE=4<br>SV=1             |

|             |      |      |     |            |             |              |      |           |           |                                                                                                   |
|-------------|------|------|-----|------------|-------------|--------------|------|-----------|-----------|---------------------------------------------------------------------------------------------------|
| CCG017801.1 | 1556 | 27   | 364 | 0.74561879 | 8.177900222 | 3.455220342  | Up   | 2.28E-12  | 5.41E-12  | Putative uncharacterized protein<br>OS=Culex quinquefasciatus<br>GN=CpipJ_CPIJ017880 PE=4<br>SV=1 |
| CCG020068.1 | 1110 | 74   | 364 | 2.86464897 | 11.46379527 | 2.000654478  | Up   | 0         | 0         | AAEL010605-PA (Fragment)<br>OS=Aedes aegypti<br>GN=AAEL010605 PE=4 SV=1                           |
| CCG015410.1 | 464  | 1298 | 364 | 120.204128 | 27.4241654  | -2.131966824 | Down | 9.29E-169 | 5.38E-168 | AAEL004060-PA OS=Aedes<br>aegypti GN=AAEL004060 PE=4<br>SV=1                                      |
| CCG018133.1 | 1971 | 1656 | 364 | 36.1024254 | 6.456018643 | -2.483379113 | Down | 4.59E-259 | 2.84E-258 | AAEL014156-PA OS=Aedes<br>aegypti GN=AAEL014156 PE=4<br>SV=1                                      |
| CCG018335.1 | 1437 | 30   | 365 | 0.8970717  | 8.879450955 | 3.307175262  | Up   | 3.71E-13  | 9.95E-13  | AAEL007774-PA OS=Aedes<br>aegypti GN=AAEL007774 PE=4<br>SV=1                                      |
| CCG001698.1 | 1029 | 34   | 365 | 1.41979687 | 12.4001662  | 3.126603016  | Up   | 8.82E-14  | 2.79E-13  | AAEL007279-PA OS=Aedes<br>aegypti GN=AAEL007279 PE=3<br>SV=1                                      |
| CCG009024.1 | 612  | 66   | 365 | 4.63399099 | 20.84929906 | 2.169671738  | Up   | 0         | 0         | AAEL007211-PA OS=Aedes<br>aegypti GN=AAEL007211 PE=4<br>SV=1                                      |
| CCG026380.1 | 1153 | 75   | 365 | 2.79508248 | 11.06658371 | 1.985247167  | Up   | 0         | 0         | AAEL009465-PA OS=Aedes<br>aegypti GN=AAEL009465 PE=4<br>SV=1                                      |
| CCG024325.1 | 1914 | 107  | 365 | 2.4021743  | 6.666547033 | 1.472598871  | Up   | 0         | 0         | AAEL008161-PA (Fragment)<br>OS=Aedes aegypti<br>GN=AAEL008161 PE=4 SV=1                           |
| CCG023933.1 | 648  | 109  | 365 | 7.22793375 | 19.69100466 | 1.445881533  | Up   | 0         | 0         | AAEL010046-PA OS=Aedes<br>aegypti GN=AAEL010046 PE=4<br>SV=1                                      |
| CCG018063.1 | 1124 | 133  | 365 | 5.08449707 | 11.35210945 | 1.158783422  | Up   | 9.90E-14  | 3.11E-13  | AAEL001597-PA OS=Aedes<br>aegypti GN=AAEL001597 PE=4<br>SV=1                                      |
| CCG022503.1 | 1455 | 135  | 365 | 3.98688259 | 8.769602077 | 1.137250261  | Up   | 1.90E-13  | 5.49E-13  | AAEL002285-PA (Fragment)<br>OS=Aedes aegypti<br>GN=AAEL002285 PE=4 SV=1                           |
| CCG006922.1 | 852  | 1027 | 365 | 51.7956778 | 14.97625707 | -1.790154609 | Down | 3.44E-106 | 1.84E-105 | AAEL014354-PA OS=Aedes<br>aegypti GN=CLIPB43 PE=3 SV=1                                            |
| CCG007182.1 | 915  | 30   | 366 | 1.40884376 | 13.98331071 | 3.311122446  | Up   | 3.71E-13  | 9.93E-13  | -                                                                                                 |
| CCG021636.1 | 834  | 45   | 366 | 2.31851086 | 15.34140204 | 2.726159946  | Up   | 0         | 0         | Ecdysone-induced protein 75C<br>OS=Aedes aegypti GN=e75C<br>PE=2 SV=1                             |

|             |      |     |     |            |             |              |      |          |            |                                                                                     |
|-------------|------|-----|-----|------------|-------------|--------------|------|----------|------------|-------------------------------------------------------------------------------------|
| CCG008762.1 | 978  | 87  | 366 | 3.82246105 | 13.0825453  | 1.775069546  | Up   | 0        | 0          | Nuclear distribution protein NUDC<br>OS=Aedes aegypti PE=2 SV=1                     |
| CCG021942.1 | 1170 | 112 | 366 | 4.11334212 | 10.93566607 | 1.41065812   | Up   | 0        | 0          | AGAP004234-PA OS=Anopheles<br>gambiae GN=AgaP_AGAP004234<br>PE=4 SV=4               |
| CCG019457.1 | 5001 | 140 | 366 | 1.20291199 | 2.558434173 | 1.088730025  | Up   | 0        | 0          | AAEL009806-PA (Fragment)<br>OS=Aedes aegypti<br>GN=AAEL009806 PE=4 SV=1             |
| CCG006702.1 | 1740 | 769 | 366 | 18.9906471 | 7.3532927   | -1.368826746 | Down | 2.00E-54 | 9.47E-54   | AAEL000993-PA OS=Aedes<br>aegypti GN=AAEL000993 PE=3<br>SV=1                        |
| CCG001899.1 | 4206 | 792 | 366 | 8.09130523 | 3.042018378 | -1.411343578 | Down | 1.32E-58 | 6.33E-58   | AAEL010379-PA OS=Aedes<br>aegypti GN=AAEL010379 PE=3<br>SV=1                        |
| CCG028309.1 | 727  | 892 | 366 | 52.7221503 | 17.59935254 | -1.582886858 | Down | 8.78E-78 | 4.44E-77   | -                                                                                   |
| CCG023564.1 | 614  | 2   | 367 | 0.13996656 | 20.89525664 | 7.221949457  | Up   | 9.36E-05 | 0.00015322 | GK23465 OS=Drosophila willistoni<br>GN=GK23465 PE=4 SV=1                            |
| CCG006818.1 | 246  | 21  | 367 | 3.66814808 | 52.15320153 | 3.829632034  | Up   | 1.76E-10 | 3.72E-10   | AAEL007539-PA OS=Aedes<br>aegypti GN=AAEL007539 PE=4<br>SV=1                        |
| CCG016284.1 | 767  | 27  | 367 | 1.5126243  | 16.72710245 | 3.467061954  | Up   | 2.28E-12 | 5.41E-12   | AAEL000697-PA OS=Aedes<br>aegypti GN=AAEL000697 PE=4<br>SV=1                        |
| CCG027995.1 | 1962 | 42  | 367 | 0.91984141 | 6.53908643  | 2.829632034  | Up   | 7.66E-14 | 2.47E-13   | AAEL000685-PA OS=Aedes<br>aegypti GN=AAEL000685 PE=4<br>SV=1                        |
| CCG021347.1 | 926  | 62  | 367 | 2.87702327 | 13.85495419 | 2.267753146  | Up   | 0        | 0          | AAEL003360-PA OS=Aedes<br>aegypti GN=AAEL003360 PE=4<br>SV=1                        |
| CCG010026.1 | 1016 | 64  | 367 | 2.70675494 | 12.62764525 | 2.221949457  | Up   | 0        | 0          | AAEL003390-PA OS=Aedes<br>aegypti GN=AAEL003390 PE=4<br>SV=1                        |
| CCG018164.1 | 1383 | 69  | 367 | 2.14382624 | 9.276708297 | 2.113425     | Up   | 0        | 0          | AAEL002427-PA OS=Aedes<br>aegypti GN=AAEL002427 PE=4<br>SV=1                        |
| CCG020621.1 | 1788 | 999 | 367 | 24.0082578 | 7.175440478 | -1.742391411 | Down | 1.51E-99 | 8.01E-99   | AGAP002896-PA (Fragment)<br>OS=Anopheles gambiae<br>GN=AgaP_AGAP002896 PE=4<br>SV=5 |
| CCG004423.1 | 480  | 3   | 368 | 0.26856084 | 26.80134553 | 6.640912659  | Up   | 5.28E-05 | 8.84E-05   | Putative salivary protein 34k-1<br>OS=Aedes albopictus PE=2 SV=1                    |
| CCG027390.1 | 1636 | 41  | 368 | 1.07686988 | 7.86347546  | 2.868323155  | Up   | 1.02E-13 | 3.19E-13   | AAEL002852-PA OS=Aedes<br>aegypti GN=AAEL002852 PE=4<br>SV=1                        |

|             |      |      |     |            |             |              |      |          |          |                                                                                          |
|-------------|------|------|-----|------------|-------------|--------------|------|----------|----------|------------------------------------------------------------------------------------------|
| CCG014346.1 | 1866 | 41   | 368 | 0.94413672 | 6.894236791 | 2.868323155  | Up   | 1.02E-13 | 3.19E-13 | AAEL014291-PA OS=Aedes aegypti GN=AAEL014291 PE=4 SV=1                                   |
| CCG024130.1 | 924  | 50   | 368 | 2.32520209 | 13.9227769  | 2.58201897   | Up   | 0        | 0        | AAEL004519-PA OS=Aedes aegypti GN=AAEL004519 PE=4 SV=1                                   |
| CCG011144.1 | 5088 | 81   | 368 | 0.68407007 | 2.528428823 | 1.886025157  | Up   | 4.46E-14 | 1.51E-13 | Putative uncharacterized protein OS=Culex quinquefasciatus GN=CpipJ_CPIJ016906 PE=4 SV=1 |
| CCG028394.1 | 1145 | 111  | 368 | 4.16562493 | 11.23549856 | 1.431459294  | Up   | 0        | 0        | AAEL000702-PA OS=Aedes aegypti GN=AAEL000702 PE=4 SV=1                                   |
| CCG013044.1 | 1440 | 128  | 368 | 3.81953197 | 8.933781842 | 1.22587516   | Up   | 4.15E-14 | 1.42E-13 | UDP-glucose 6-dehydrogenase OS=Aedes aegypti GN=AAEL011242 PE=3 SV=1                     |
| CCG005634.1 | 2049 | 658  | 368 | 13.798968  | 6.278499684 | -1.136068614 | Down | 2.61E-35 | 1.13E-34 | AAEL007030-PA OS=Aedes aegypti GN=AAEL007030 PE=4 SV=1                                   |
| CCG025112.1 | 825  | 2634 | 368 | 137.190644 | 15.59351012 | -3.13716447  | Down | 0        | 0        | AAEL003474-PA OS=Aedes aegypti GN=AAEL003474 PE=4 SV=1                                   |
| CCG019723.1 | 836  | 25   | 369 | 1.2849801  | 15.43014848 | 3.58593402   | Up   | 9.32E-12 | 2.08E-11 | AAEL013351-PA OS=Aedes aegypti GN=AAEL013351 PE=3 SV=1                                   |
| CCG000291.1 | 1379 | 40   | 369 | 1.24640274 | 9.354317715 | 2.907862115  | Up   | 6.86E-14 | 2.24E-13 | -                                                                                        |
| CCG010218.1 | 1438 | 56   | 369 | 1.67336936 | 8.970517475 | 2.422435288  | Up   | 0        | 0        | AAEL010331-PA OS=Aedes aegypti GN=AAEL010331 PE=4 SV=1                                   |
| CCG022089.1 | 853  | 77   | 369 | 3.87886233 | 15.12263087 | 1.963003669  | Up   | 0        | 0        | AAEL004291-PA OS=Aedes aegypti GN=AAEL004291 PE=4 SV=1                                   |
| CCG003536.1 | 1398 | 77   | 369 | 2.36671643 | 9.227184642 | 1.963003669  | Up   | 0        | 0        | AAEL002044-PA OS=Aedes aegypti GN=AAEL002044 PE=4 SV=1                                   |
| CCG009861.1 | 501  | 97   | 369 | 8.31948954 | 25.74771283 | 1.629877368  | Up   | 3.62E-14 | 1.25E-13 | AAEL014545-PA OS=Aedes aegypti GN=AAEL014545 PE=4 SV=1                                   |
| CCG025880.1 | 884  | 117  | 369 | 5.68717076 | 14.59231236 | 1.35942549   | Up   | 9.44E-14 | 2.98E-13 | AAEL009284-PA OS=Aedes aegypti GN=AAEL009284 PE=4 SV=1                                   |
| CCG013002.3 | 1044 | 136  | 369 | 5.59758995 | 12.35594265 | 1.142327369  | Up   | 1.70E-13 | 4.99E-13 | AAEL013065-PA OS=Aedes aegypti GN=AAEL013065 PE=4 SV=1                                   |
| CCG010470.1 | 903  | 611  | 369 | 29.0747595 | 14.28527589 | -1.02523836  | Down | 4.49E-28 | 1.87E-27 | -                                                                                        |
| CCG004611.1 | 4053 | 676  | 369 | 7.16692341 | 3.182729862 | -1.171089226 | Down | 5.80E-38 | 2.56E-37 | AAEL006522-PA (Fragment) OS=Aedes aegypti GN=AAEL006522 PE=4 SV=1                        |

|             |      |      |     |            |             |              |      |           |           |                                                                                                |
|-------------|------|------|-----|------------|-------------|--------------|------|-----------|-----------|------------------------------------------------------------------------------------------------|
| CCG008545.1 | 522  | 12   | 371 | 0.98780999 | 24.84582506 | 4.65262608   | Up   | 1.30E-07  | 2.49E-07  | -                                                                                              |
| CCG003818.1 | 1116 | 28   | 371 | 1.0780937  | 11.6214343  | 3.430233658  | Up   | 1.17E-12  | 2.85E-12  | AAEL004955-PA OS=Aedes aegypti GN=AAEL004955 PE=4 SV=1                                         |
| CCG006919.1 | 2324 | 36   | 371 | 0.66562412 | 5.580688762 | 3.067663579  | Up   | 6.13E-14  | 2.03E-13  | DNA ligase (Fragment)<br>OS=Anopheles gambiae<br>GN=AGAP009222 PE=3 SV=3                       |
| CCG007214.1 | 965  | 37   | 371 | 1.64754423 | 13.43991781 | 3.028135215  | Up   | 5.17E-14  | 1.74E-13  | -                                                                                              |
| CCG008338.2 | 1283 | 87   | 371 | 2.91377    | 10.10874566 | 1.794645085  | Up   | 0         | 0         | AAEL004309-PA OS=Aedes aegypti GN=AAEL004309 PE=4 SV=1                                         |
| CCG008800.1 | 1206 | 88   | 371 | 3.13543669 | 10.75416309 | 1.778156962  | Up   | 2.93E-14  | 1.02E-13  | AAEL009170-PA OS=Aedes aegypti GN=AAEL009170 PE=3 SV=1                                         |
| CCG002518.1 | 873  | 129  | 371 | 6.34947968 | 14.85626653 | 1.226361325  | Up   | 0         | 0         | AAEL005479-PA OS=Aedes aegypti GN=AAEL005479 PE=4 SV=1                                         |
| CCG001200.1 | 1944 | 1083 | 371 | 23.9383861 | 6.671564137 | -1.843228947 | Down | 1.89E-116 | 1.03E-115 | AAEL005160-PA OS=Aedes aegypti GN=AAEL005160 PE=4 SV=1                                         |
| CCG024809.1 | 1590 | 18   | 372 | 0.48644983 | 8.178917584 | 4.071547013  | Up   | 1.62E-09  | 3.32E-09  | AGAP004522-PA OS=Anopheles gambiae GN=AgaP_AGAP004522 PE=4 SV=4                                |
| CCG003887.1 | 1809 | 31   | 372 | 0.73635256 | 7.188766699 | 3.287275705  | Up   | 2.40E-13  | 6.77E-13  | AAEL013167-PA OS=Aedes aegypti GN=AAEL013167 PE=4 SV=1                                         |
| CCG021040.1 | 1182 | 60   | 372 | 2.1812048  | 11.00209726 | 2.334581419  | Up   | 0         | 0         | Putative uncharacterized protein<br>OS=Culex quinquefasciatus<br>GN=CpipJ_CPIJ008082 PE=4 SV=1 |
| CCG003001.1 | 1053 | 124  | 372 | 5.06006371 | 12.34993253 | 1.287275705  | Up   | 1.61E-13  | 4.76E-13  | AAEL015291-PA (Fragment)<br>OS=Aedes aegypti<br>GN=AAEL015291 PE=4 SV=1                        |
| CCG026512.1 | 877  | 629  | 372 | 30.818658  | 14.82836825 | -1.055444192 | Down | 3.45E-30  | 1.46E-29  | AAEL010002-PA OS=Aedes aegypti GN=AAEL010002 PE=4 SV=1                                         |
| CCG000018.1 | 3901 | 2428 | 372 | 26.7445567 | 3.333627008 | -3.004080691 | Down | 0         | 0         | AAEL004133-PA OS=Aedes aegypti GN=AAEL004133 PE=4 SV=1                                         |
| CCG018508.1 | 1461 | 23   | 373 | 0.67645715 | 8.925008375 | 3.721783068  | Up   | 4.01E-11  | 8.66E-11  | AAEL001870-PA OS=Aedes aegypti GN=AAEL001870 PE=4 SV=1                                         |
| CCG001396.1 | 507  | 48   | 373 | 4.06814055 | 25.71881112 | 2.660382523  | Up   | 5.35E-14  | 1.80E-13  | AAEL005259-PA OS=Aedes aegypti GN=AAEL005259 PE=4 SV=1                                         |

|             |      |      |     |            |             |              |      |           |           |                                                                                                        |
|-------------|------|------|-----|------------|-------------|--------------|------|-----------|-----------|--------------------------------------------------------------------------------------------------------|
| CCG004648.1 | 1967 | 73   | 373 | 1.594708   | 6.629098747 | 2.055520465  | Up   | 0         | 0         | AAEL001996-PA OS=Aedes aegypti GN=AAEL001996 PE=4 SV=1                                                 |
| CCG023137.1 | 2214 | 80   | 373 | 1.55265527 | 5.889538047 | 1.923416929  | Up   | 0         | 0         | AAEL002514-PA OS=Aedes aegypti GN=AAEL002514 PE=4 SV=1                                                 |
| CCG006032.1 | 1473 | 90   | 373 | 2.62544203 | 8.852299549 | 1.753491928  | Up   | 0         | 0         | AAEL002864-PA OS=Aedes aegypti GN=AAEL002864 PE=4 SV=1                                                 |
| CCG017755.1 | 1066 | 101  | 373 | 4.07124127 | 12.23211748 | 1.587133541  | Up   | 0         | 0         | AAEL008691-PA OS=Aedes aegypti GN=AAEL008691 PE=4 SV=1                                                 |
| CCG008557.1 | 710  | 102  | 373 | 6.1731168  | 18.36540456 | 1.572919682  | Up   | 0         | 0         | Ubiquitin conjugation factor E4A OS=Culex quinquefasciatus GN=CpipJ_CPIJ001165 PE=4 SV=1               |
| CCG014006.1 | 1332 | 726  | 373 | 23.4204409 | 9.789367294 | -1.258480714 | Down | 2.27E-45  | 1.04E-44  | AAEL006630-PA OS=Aedes aegypti GN=AAEL006630 PE=4 SV=1                                                 |
| CCG015692.1 | 2358 | 1146 | 373 | 20.8835097 | 5.529871601 | -1.917046305 | Down | 7.82E-130 | 4.34E-129 | AAEL014316-PA (Fragment) OS=Aedes aegypti GN=AAEL014316 PE=4 SV=1                                      |
| CCG027807.1 | 465  | 40   | 374 | 3.69632126 | 28.1169796  | 2.927279569  | Up   | 6.86E-14  | 2.25E-13  | AAEL000408-PA OS=Aedes aegypti GN=AAEL000408 PE=4 SV=1                                                 |
| CCG021152.1 | 849  | 76   | 374 | 3.84652512 | 15.39975914 | 2.00128015   | Up   | 0         | 0         | AAEL011171-PA OS=Aedes aegypti GN=AAEL011171 PE=3 SV=1                                                 |
| CCG010949.1 | 1644 | 134  | 374 | 3.50239929 | 7.952795324 | 1.183118473  | Up   | 0         | 0         | AAEL002560-PA OS=Aedes aegypti GN=AAEL002560 PE=4 SV=1                                                 |
| CCG010098.1 | 996  | 52   | 375 | 2.2433998  | 13.1620018  | 2.552620271  | Up   | 0         | 0         | Ribosomal protein S6 kinase, 90kD, polypeptide OS=Culex quinquefasciatus GN=CpipJ_CPIJ012176 PE=4 SV=1 |
| CCG028220.1 | 327  | 102  | 375 | 13.4034035 | 40.08976694 | 1.580634647  | Up   | 0         | 0         | -                                                                                                      |
| CCG002793.1 | 443  | 106  | 375 | 10.2816972 | 29.59222074 | 1.525139535  | Up   | 0         | 0         | Shmp sm protein OS=Culex quinquefasciatus GN=CpipJ_CPIJ001194 PE=4 SV=1                                |
| CCG021868.1 | 1107 | 110  | 375 | 4.26980199 | 11.84223468 | 1.471700276  | Up   | 0         | 0         | AAEL001326-PA OS=Aedes aegypti GN=AAEL001326 PE=4 SV=1                                                 |
| CCG006255.1 | 3192 | 138  | 375 | 1.85771409 | 4.10694041  | 1.144535532  | Up   | 1.49E-13  | 4.45E-13  | Putative uncharacterized protein OS=Culex quinquefasciatus GN=CpipJ_CPIJ013304 PE=4 SV=1               |

|             |      |      |     |            |             |              |      |           |            |                                                                                                   |
|-------------|------|------|-----|------------|-------------|--------------|------|-----------|------------|---------------------------------------------------------------------------------------------------|
| CCG006264.1 | 468  | 144  | 375 | 13.2214568 | 28.01143972 | 1.083134988  | Up   | 7.62E-14  | 2.46E-13   | Peptidyl-prolyl cis-trans isomerase<br>OS=Aedes aegypti<br>GN=AAEL004779 PE=3 SV=1                |
| CCG010078.1 | 483  | 649  | 375 | 57.7378008 | 27.14151923 | -1.089014679 | Down | 1.21E-32  | 5.15E-32   | Putative uncharacterized protein<br>OS=Culex quinquefasciatus<br>GN=CpipJ_CPIJ019370 PE=4<br>SV=1 |
| CCG016315.1 | 1173 | 1451 | 375 | 53.1535251 | 11.17591968 | -2.249771815 | Down | 1.18E-201 | 7.06E-201  | AAEL0008963-PA OS=Aedes<br>aegypti GN=AAEL008963 PE=3<br>SV=1                                     |
| CCG025054.1 | 2522 | 6859 | 375 | 116.863366 | 5.197999124 | -4.490722551 | Down | 0         | 0          | AAEL0005569-PA OS=Aedes<br>aegypti GN=AAEL005569 PE=4<br>SV=1                                     |
| CCG023622.1 | 849  | 10   | 376 | 0.50612173 | 15.4821108  | 4.934973961  | Up   | 5.43E-07  | 1.01E-06   | -                                                                                                 |
| CCG004904.1 | 1080 | 26   | 376 | 1.03445657 | 12.17065932 | 3.556462337  | Up   | 4.60E-12  | 1.05E-11   | AAEL000411-PA OS=Aedes<br>aegypti GN=AAEL000411 PE=4<br>SV=1                                      |
| CCG001507.1 | 1869 | 39   | 376 | 0.89663973 | 7.032804744 | 2.971499837  | Up   | 7.33E-14  | 2.38E-13   | AAEL0003178-PA OS=Aedes<br>aegypti GN=AAEL003178 PE=4<br>SV=1                                     |
| CCG026487.1 | 1929 | 41   | 376 | 0.91330177 | 6.814054985 | 2.899350051  | Up   | 1.02E-13  | 3.19E-13   | Zinc finger protein 394 OS=Culex<br>quinquefasciatus<br>GN=CpipJ_CPIJ005856 PE=4<br>SV=1          |
| CCG011159.1 | 3309 | 106  | 376 | 1.37648591 | 3.972291347 | 1.528981601  | Up   | 0         | 0          | AAEL0006614-PA OS=Aedes<br>aegypti GN=AAEL006614 PE=4<br>SV=1                                     |
| CCG020707.1 | 3213 | 125  | 376 | 1.67171392 | 4.090977923 | 1.291117771  | Up   | 2.35E-14  | 8.22E-14   | AAEL0005429-PA OS=Aedes<br>aegypti GN=AAEL005429 PE=4<br>SV=1                                     |
| CCG012894.1 | 1533 | 139  | 376 | 3.89614684 | 8.5742414   | 1.137960983  | Up   | 1.46E-13  | 4.37E-13   | AAEL0009499-PA OS=Aedes<br>aegypti GN=AAEL009499 PE=4<br>SV=1                                     |
| CCG016477.1 | 489  | 1    | 377 | 0.08787267 | 26.95147309 | 8.260733917  | Up   | 0.000587  | 0.00091598 | AAEL013262-PA OS=Aedes<br>aegypti GN=AAEL013262 PE=4<br>SV=1                                      |
| CCG000857.1 | 2448 | 38   | 377 | 0.66701385 | 5.383688866 | 3.012806404  | Up   | 4.26E-14  | 1.45E-13   | AAEL012906-PA OS=Aedes<br>aegypti GN=AAEL012906 PE=4<br>SV=1                                      |
| CCG024187.1 | 1960 | 40   | 377 | 0.87693336 | 6.724117522 | 2.938805822  | Up   | 6.86E-14  | 2.24E-13   | AAEL0008769-PA OS=Aedes<br>aegypti GN=AAEL008769 PE=3<br>SV=1                                     |
| CCG026931.1 | 1278 | 81   | 377 | 2.72343388 | 10.31241811 | 1.920883914  | Up   | 4.46E-14  | 1.51E-13   | AAEL010728-PA OS=Aedes<br>aegypti GN=AAEL010728 PE=4<br>SV=1                                      |
| CCG027145.1 | 1780 | 100  | 377 | 2.41403003 | 7.404084462 | 1.616877727  | Up   | 0         | 0          | AAEL014348-PB OS=Aedes<br>aegypti GN=CASPS8 PE=4 SV=1                                             |



|             |      |      |     |            |             |              |      |           |            |                                                                                          |
|-------------|------|------|-----|------------|-------------|--------------|------|-----------|------------|------------------------------------------------------------------------------------------|
| CCG019120.2 | 1152 | 122  | 377 | 4.55061426 | 11.44033884 | 1.32999658   | Up   | 8.04E-14  | 2.58E-13   | AAEL000461-PA OS=Aedes aegypti GN=AAEL000461 PE=4 SV=1                                   |
| CCG025975.1 | 1590 | 1395 | 377 | 37.6998615 | 8.288849272 | -2.18531549  | Down | 5.23E-187 | 3.09E-186  | AAEL013611-PA OS=Aedes aegypti GN=AAEL013611 PE=4 SV=1                                   |
| CCG008307.1 | 2313 | 5336 | 377 | 99.1294872 | 5.697911951 | -4.120809034 | Down | 0         | 0          | Myosin light chain kinase OS=Culex quinquefasciatus GN=CpipJ_CPIJ005740 PE=4 SV=1        |
| CCG019130.1 | 734  | 1    | 378 | 0.05854187 | 18.00303627 | 8.264555628  | Up   | 0.000587  | 0.00091564 | AAEL009973-PA OS=Aedes aegypti GN=AAEL009973 PE=4 SV=1                                   |
| CCG001120.1 | 791  | 29   | 378 | 1.57537586 | 16.70572518 | 3.406574633  | Up   | 6.66E-13  | 1.69E-12   | AAEL006819-PA OS=Aedes aegypti GN=AAEL006819 PE=4 SV=1                                   |
| CCG006386.1 | 1379 | 45   | 378 | 1.40220309 | 9.582471806 | 2.772702532  | Up   | 0         | 0          | Putative uncharacterized protein OS=Culex quinquefasciatus GN=CpipJ_CPIJ008646 PE=4 SV=1 |
| CCG027535.1 | 1551 | 54   | 378 | 1.49604492 | 8.519812134 | 2.509668126  | Up   | 0         | 0          | AAEL001785-PA OS=Aedes aegypti GN=AAEL001785 PE=4 SV=1                                   |
| CCG006131.1 | 1134 | 58   | 378 | 2.19774657 | 11.65275892 | 2.406574633  | Up   | 0         | 0          | AAEL008544-PA OS=Aedes aegypti GN=AAEL008544 PE=4 SV=1                                   |
| CCG014579.1 | 1736 | 84   | 378 | 2.07918071 | 7.611882846 | 1.872238205  | Up   | 0         | 0          | Putative uncharacterized protein OS=Culex quinquefasciatus GN=CpipJ_CPIJ011278 PE=4 SV=1 |
| CCG028197.1 | 900  | 85   | 378 | 4.05825271 | 14.68247624 | 1.855164692  | Up   | 0         | 0          | Protein kinase C OS=Aedes aegypti GN=AAEL001108 PE=3 SV=1                                |
| CCG010492.1 | 1107 | 86   | 378 | 3.33820883 | 11.93697256 | 1.838290873  | Up   | 0         | 0          | AAEL005637-PA OS=Aedes aegypti GN=AAEL005637 PE=4 SV=1                                   |
| CCG021584.1 | 1010 | 96   | 378 | 4.084252   | 13.08339467 | 1.679593127  | Up   | 0         | 0          | AAEL002836-PA (Fragment) OS=Aedes aegypti GN=AAEL002836 PE=4 SV=1                        |
| CCG023666.1 | 984  | 98   | 378 | 4.27950609 | 13.42909413 | 1.649845784  | Up   | 0         | 0          | AAEL009589-PA OS=Aedes aegypti GN=AAEL009589 PE=4 SV=1                                   |
| CCG000055.1 | 737  | 150  | 378 | 8.74553622 | 17.92975389 | 1.035736938  | Up   | 0         | 0          | AAEL011710-PA OS=Aedes aegypti GN=AAEL011710 PE=4 SV=1                                   |
| CCG003501.1 | 744  | 1307 | 378 | 75.4858107 | 17.76105997 | -2.087487798 | Down | 2.26E-165 | 1.31E-164  | AAEL014944-PA OS=Aedes aegypti GN=SGP2D7 PE=2 SV=1                                       |

|             |      |      |     |            |             |              |      |           |           |                                                                                                   |
|-------------|------|------|-----|------------|-------------|--------------|------|-----------|-----------|---------------------------------------------------------------------------------------------------|
| CCG005099.1 | 405  | 1571 | 378 | 166.680131 | 32.62772499 | -2.352911837 | Down | 1.59E-230 | 9.65E-230 | Putative uncharacterized protein<br>OS=Culex quinquefasciatus<br>GN=CpipJ_CPIJ004235 PE=4<br>SV=1 |
| CCG023160.1 | 1119 | 45   | 379 | 1.72800541 | 11.84020277 | 2.776514146  | Up   | 0         | 0         | AAEL013503-PA OS=Aedes<br>aegypti GN=AAEL013503 PE=4<br>SV=1                                      |
| CCG013116.1 | 606  | 49   | 379 | 3.47445049 | 21.86334471 | 2.653657398  | Up   | 0         | 0         | AAEL005704-PA OS=Aedes<br>aegypti GN=AAEL005704 PE=4<br>SV=1                                      |
| CCG001584.1 | 4632 | 66   | 379 | 0.61226306 | 2.860359865 | 2.223973123  | Up   | 0         | 0         | AAEL002922-PA OS=Aedes<br>aegypti GN=AAEL002922 PE=4<br>SV=1                                      |
| CCG014808.1 | 1879 | 75   | 379 | 1.71513044 | 7.051190472 | 2.039548551  | Up   | 0         | 0         | NADPH:adrenodoxin<br>oxidoreductase, mitochondrial<br>OS=Aedes aegypti<br>GN=AAEL006733 PE=3 SV=1 |
| CCG005376.1 | 1089 | 77   | 379 | 3.03826406 | 12.16637915 | 2.001580701  | Up   | 0         | 0         | AAEL011989-PA OS=Aedes<br>aegypti GN=AAEL011989 PE=4<br>SV=1                                      |
| CCG023379.1 | 1215 | 79   | 379 | 2.7939169  | 10.90468057 | 1.964586494  | Up   | 0         | 0         | Uncharacterized protein<br>OS=Anopheles darlingi<br>GN=AND_02694 PE=4 SV=1                        |
| CCG007383.2 | 1119 | 80   | 379 | 3.07200962 | 11.84020277 | 1.946439147  | Up   | 0         | 0         | AGAP001896-PA OS=Anopheles<br>gambiae GN=AGAP001896 PE=4<br>SV=1                                  |
| CCG008694.1 | 1788 | 146  | 379 | 3.50871435 | 7.410059786 | 1.078542683  | Up   | 9.99E-15  | 3.57E-14  | AAEL009899-PA OS=Aedes<br>aegypti GN=AAEL009899 PE=4<br>SV=1                                      |
| CCG005111.1 | 438  | 2435 | 379 | 238.884255 | 30.24928515 | -2.981338815 | Down | 0         | 0         | AAEL001164-PA OS=Aedes<br>aegypti GN=AAEL001164 PE=4<br>SV=1                                      |
| CCG019237.1 | 984  | 54   | 380 | 2.35809519 | 13.50014753 | 2.51728131   | Up   | 0         | 0         | AAEL005813-PA OS=Aedes<br>aegypti GN=AAEL005813 PE=4<br>SV=1                                      |
| CCG020342.1 | 1797 | 66   | 380 | 1.57818725 | 7.392401321 | 2.227774693  | Up   | 0         | 0         | AAEL012156-PA OS=Aedes<br>aegypti GN=AAEL012156 PE=4<br>SV=1                                      |
| CCG023531.2 | 2283 | 687  | 380 | 12.9304458 | 5.818723247 | -1.151997477 | Down | 1.37E-37  | 6.02E-37  | AAEL007180-PA OS=Aedes<br>aegypti GN=AAEL007180 PE=4<br>SV=2                                      |
| CCG005933.1 | 735  | 6    | 381 | 0.35077334 | 18.12122918 | 5.690997891  | Up   | 8.38E-06  | 1.47E-05  | AAEL005000-PA OS=Aedes<br>aegypti GN=AAEL005000 PE=4<br>SV=1                                      |
| CCG022938.1 | 1866 | 22   | 381 | 0.50660995 | 7.137783199 | 3.816528773  | Up   | 8.38E-11  | 1.80E-10  | AAEL014291-PA OS=Aedes<br>aegypti GN=AAEL014291 PE=4<br>SV=1                                      |

|             |      |      |     |            |             |              |      |           |           |                                                                                                |
|-------------|------|------|-----|------------|-------------|--------------|------|-----------|-----------|------------------------------------------------------------------------------------------------|
| CCG000130.1 | 330  | 40   | 381 | 5.20845268 | 40.36091955 | 2.954032296  | Up   | 6.86E-14  | 2.24E-13  | AAEL014055-PA OS=Aedes aegypti GN=AAEL014055 PE=4 SV=1                                         |
| CCG023654.1 | 966  | 45   | 381 | 2.00169571 | 13.78789177 | 2.784107295  | Up   | 0         | 0         | Cuiclicron OS=Culex quinquefasciatus GN=CpipJ_CPIJ005389 PE=4 SV=1                             |
| CCG013164.1 | 1717 | 49   | 381 | 1.22627664 | 7.757194788 | 2.661250547  | Up   | 0         | 0         | AAEL008392-PA OS=Aedes aegypti GN=AAEL008392 PE=4 SV=1                                         |
| CCG019080.1 | 1257 | 81   | 381 | 2.76893278 | 10.59594547 | 1.936110388  | Up   | 4.46E-14  | 1.51E-13  | AAEL003744-PA (Fragment) OS=Aedes aegypti GN=AAEL003744 PE=4 SV=1                              |
| CCG024032.1 | 1230 | 105  | 381 | 3.66814808 | 10.82853939 | 1.561714874  | Up   | 0         | 0         | AAEL004682-PA OS=Aedes aegypti GN=AAEL004682 PE=4 SV=1                                         |
| CCG025554.1 | 1002 | 112  | 381 | 4.80300427 | 13.29251841 | 1.468605469  | Up   | 0         | 0         | AAEL007996-PA OS=Aedes aegypti GN=AAEL007996 PE=4 SV=1                                         |
| CCG014946.1 | 978  | 1584 | 381 | 69.595153  | 13.61871518 | -2.353396229 | Down | 1.78E-232 | 1.09E-231 | tRNA pseudouridine synthase OS=Aedes aegypti GN=AAEL003683 PE=3 SV=1                           |
| CCG009321.1 | 1332 | 19   | 382 | 0.61293165 | 10.02557187 | 4.031814518  | Up   | 7.73E-10  | 1.60E-09  | AAEL010588-PA (Fragment) OS=Aedes aegypti GN=AAEL010588 PE=4 SV=1                              |
| CCG007463.1 | 1868 | 52   | 382 | 1.19615964 | 7.148855314 | 2.579302314  | Up   | 0         | 0         | Gastrula zinc finger protein XLCGF62.1 OS=Culex quinquefasciatus GN=CpipJ_CPIJ007367 PE=4 SV=1 |
| CCG009227.1 | 5034 | 63   | 382 | 0.53776188 | 2.652773486 | 2.302462108  | Up   | 0         | 0         | AAEL003012-PA OS=Aedes aegypti GN=AAEL003012 PE=4 SV=1                                         |
| CCG025348.1 | 1027 | 7610 | 382 | 318.402805 | 13.00298123 | -4.613938707 | Down | 0         | 0         | -                                                                                              |
| CCG002383.1 | 1386 | 3    | 383 | 0.09300808 | 9.660187593 | 6.698551285  | Up   | 5.28E-05  | 8.84E-05  | AAEL010782-PA OS=Aedes aegypti GN=AAEL010782 PE=3 SV=1                                         |
| CCG019134.1 | 1974 | 17   | 383 | 0.37005344 | 6.782684906 | 4.196050944  | Up   | 3.39E-09  | 6.89E-09  | AAEL002281-PA OS=Aedes aegypti GN=AAEL002281 PE=4 SV=1                                         |
| CCG007063.1 | 1905 | 24   | 383 | 0.54135099 | 7.028356957 | 3.698551285  | Up   | 1.93E-11  | 4.23E-11  | AAEL002250-PA OS=Aedes aegypti GN=AAEL002250 PE=4 SV=1                                         |
| CCG012794.1 | 1359 | 25   | 383 | 0.79046605 | 9.85211185  | 3.639657596  | Up   | 9.32E-12  | 2.08E-11  | AAEL010331-PA OS=Aedes aegypti GN=AAEL010331 PE=4 SV=1                                         |

|             |      |      |     |            |             |              |      |           |           |                                                                                            |
|-------------|------|------|-----|------------|-------------|--------------|------|-----------|-----------|--------------------------------------------------------------------------------------------|
| CCG027870.1 | 564  | 46   | 383 | 3.50462374 | 23.73939717 | 2.75995183   | Up   | 3.40E-14  | 1.18E-13  | -                                                                                          |
| CCG005955.1 | 840  | 114  | 383 | 5.83160684 | 15.93930953 | 1.450623772  | Up   | 8.48E-14  | 2.70E-13  | NADPH17AD oxidoreductase<br>OS=Culex quinquefasciatus<br>GN=CpipJ_CPIJ003677 PE=4<br>SV=1  |
| CCG018494.1 | 7563 | 1788 | 383 | 10.1586521 | 1.770331879 | -2.520617235 | Down | 1.84E-284 | 1.15E-283 | Tyrosine-protein kinase receptor<br>(Fragment) OS=Aedes aegypti<br>GN=AAEL007742 PE=3 SV=1 |
| CCG011840.1 | 2091 | 11   | 384 | 0.22604834 | 6.4198844   | 4.827844086  | Up   | 2.67E-07  | 5.03E-07  | AAEL004869-PA (Fragment)<br>OS=Aedes aegypti<br>GN=AAEL004869 PE=4 SV=1                    |
| CCG022196.1 | 967  | 40   | 384 | 1.77744507 | 13.88208716 | 2.96534761   | Up   | 6.86E-14  | 2.24E-13  | AAEL008320-PA OS=Aedes<br>aegypti GN=AAEL008320 PE=4<br>SV=1                               |
| CCG010014.1 | 2499 | 44   | 384 | 0.75656996 | 5.371740008 | 2.827844086  | Up   | 3.91E-14  | 1.34E-13  | AAEL009815-PA OS=Aedes<br>aegypti GN=AAEL009815 PE=4<br>SV=1                               |
| CCG001165.1 | 2595 | 61   | 384 | 1.01007854 | 5.173016678 | 2.356538367  | Up   | 1.75E-14  | 6.17E-14  | AAEL002195-PA (Fragment)<br>OS=Aedes aegypti<br>GN=AAEL002195 PE=4 SV=1                    |
| CCG026438.1 | 1300 | 65   | 384 | 2.14848673 | 10.32613714 | 2.264907892  | Up   | 0         | 0         | AAEL003526-PA OS=Aedes<br>aegypti GN=AAEL003526 PE=4<br>SV=1                               |
| CCG023932.1 | 860  | 67   | 384 | 3.34764212 | 15.60927707 | 2.221186514  | Up   | 0         | 0         | AAEL010053-PA OS=Aedes<br>aegypti GN=AAEL010053 PE=4<br>SV=1                               |
| CCG003203.1 | 1113 | 71   | 384 | 2.74110616 | 12.06107662 | 2.137528585  | Up   | 0         | 0         | AAEL005064-PA OS=Aedes<br>aegypti GN=CLIPB5 PE=3 SV=1                                      |
| CCG009136.1 | 1532 | 83   | 384 | 2.32799476 | 8.762387912 | 1.912236273  | Up   | 1.32E-13  | 4.02E-13  | AAEL005635-PA OS=Aedes<br>aegypti GN=AAEL005635 PE=4<br>SV=1                               |
| CCG011630.1 | 2385 | 94   | 384 | 1.69356606 | 5.628502424 | 1.732686853  | Up   | 0         | 0         | AAEL009919-PA OS=Aedes<br>aegypti GN=AAEL009919 PE=4<br>SV=1                               |
| CCG027707.1 | 1340 | 123  | 384 | 3.94423683 | 10.01789424 | 1.344761199  | Up   | 0         | 0         | Uncharacterized protein<br>OS=Anopheles darlingi<br>GN=AND_17122 PE=4 SV=1                 |
| CCG004357.1 | 714  | 130  | 384 | 7.82362115 | 18.80109003 | 1.264907892  | Up   | 0         | 0         | FAM105 OS=Culex<br>quinquefasciatus<br>GN=CpipJ_CPIJ016405 PE=4<br>SV=1                    |

|             |       |      |     |            |             |              |      |           |           |                                                                                                |
|-------------|-------|------|-----|------------|-------------|--------------|------|-----------|-----------|------------------------------------------------------------------------------------------------|
| CCG015468.1 | 3642  | 627  | 384 | 7.39759023 | 3.685880912 | -1.005045928 | Down | 6.93E-28  | 2.88E-27  | Serine-enriched protein OS=Culex quinquefasciatus GN=CpipJ_CPIJ005696 PE=4 SV=1                |
| CCG016960.1 | 3861  | 1582 | 384 | 17.6063507 | 3.476813851 | -2.34025818  | Down | 1.31E-230 | 7.97E-230 | AAEL000037-PA OS=Aedes aegypti GN=CLIPB35 PE=3 SV=1                                            |
| CCG025026.1 | 2448  | 1607 | 384 | 28.2076648 | 5.483651258 | -2.362878509 | Down | 5.65E-237 | 3.45E-236 | microtubule-associated protein OS=Culex quinquefasciatus GN=CpipJ_CPIJ013260 PE=4 SV=1         |
| CCG014070.1 | 807   | 68   | 385 | 3.62074592 | 16.67774047 | 2.203564998  | Up   | 0         | 0         | Fat body protein 2 OS=Culex quinquefasciatus GN=CpipJ_CPIJ018909 PE=3 SV=1                     |
| CCG012221.1 | 1820  | 16   | 386 | 0.37775591 | 7.414227931 | 4.294770241  | Up   | 7.09E-09  | 1.42E-08  | AAEL002058-PA OS=Aedes aegypti GN=AAEL002838 PE=4 SV=1                                         |
| CCG026687.1 | 3939  | 30   | 386 | 0.32726378 | 3.425715876 | 3.387879645  | Up   | 3.71E-13  | 9.95E-13  | AAEL000658-PA OS=Aedes aegypti GN=AAEL006658 PE=4 SV=1                                         |
| CCG004327.1 | 651   | 54   | 386 | 3.56430978 | 20.72794905 | 2.539882739  | Up   | 0         | 0         | AAEL013578-PA OS=Aedes aegypti GN=AAEL013578 PE=4 SV=1                                         |
| CCG011014.1 | 780   | 156  | 386 | 8.59394692 | 17.29986517 | 1.009368022  | Up   | 1.59E-13  | 4.71E-13  | AAEL013225-PA OS=Aedes aegypti GN=AAEL013225 PE=4 SV=1                                         |
| CCG026050.1 | 390   | 770  | 386 | 84.8376812 | 34.59973034 | -1.293944394 | Down | 4.43E-50  | 2.07E-49  | AAEL009810-PA OS=Aedes aegypti GN=AAEL009810 PE=2 SV=1                                         |
| CCG006328.1 | 1836  | 31   | 387 | 0.72552384 | 7.368656378 | 3.34430665   | Up   | 2.40E-13  | 6.78E-13  | Putative uncharacterized protein OS=Culex quinquefasciatus GN=CpipJ_CPIJ009123 PE=4 SV=1       |
| CCG018315.1 | 785   | 55   | 387 | 3.01061835 | 17.23420778 | 2.517143246  | Up   | 0         | 0         | Mediator complex OS=Culex quinquefasciatus GN=CpipJ_CPIJ006001 PE=4 SV=1                       |
| CCG010986.1 | 1700  | 127  | 387 | 3.21009194 | 7.958148889 | 1.309818273  | Up   | 1.57E-13  | 4.67E-13  | S-methyl-5-riboadenosine phosphorylase OS=Culex quinquefasciatus GN=CpipJ_CPIJ002278 PE=3 SV=1 |
| CCG023353.1 | 20046 | 863  | 387 | 1.8498893  | 0.674890408 | -1.454713789 | Down | 1.30E-66  | 6.37E-66  | Putative uncharacterized protein OS=Culex quinquefasciatus GN=CpipJ_CPIJ016863 PE=4 SV=1       |

|             |      |      |     |            |             |              |      |           |           |                                                                   |
|-------------|------|------|-----|------------|-------------|--------------|------|-----------|-----------|-------------------------------------------------------------------|
| CCG016626.1 | 6855 | 1379 | 387 | 8.64409395 | 1.973574487 | -2.130903782 | Down | 4.72E-179 | 2.76E-178 | AAEL007465-PA OS=Aedes aegypti GN=AAEL007465 PE=4 SV=1            |
| CCG006583.1 | 676  | 2463 | 387 | 156.559847 | 20.01309632 | -2.967697953 | Down | 0         | 0         | AAEL007283-PA OS=Aedes aegypti GN=AAEL007283 PE=4 SV=1            |
| CCG002975.1 | 1488 | 15   | 388 | 0.43316265 | 9.115464642 | 4.39533545   | Up   | 1.48E-08  | 2.93E-08  | AAEL009709-PA OS=Aedes aegypti GN=AAEL009709 PE=4 SV=1            |
| CCG013525.1 | 2674 | 17   | 388 | 0.27318081 | 5.072479951 | 4.214763205  | Up   | 3.39E-09  | 6.89E-09  | Polyprotein OS=Antheraea mylitta PE=4 SV=1                        |
| CCG005988.1 | 1798 | 32   | 388 | 0.76475612 | 7.543832807 | 3.302226046  | Up   | 1.77E-13  | 5.17E-13  | AAEL004125-PA OS=Aedes aegypti GN=AAEL004125 PE=4 SV=1            |
| CCG020412.1 | 1941 | 94   | 388 | 2.08096602 | 6.988053265 | 1.747637194  | Up   | 0         | 0         | AAEL002594-PA (Fragment) OS=Aedes aegypti GN=AAEL002594 PE=4 SV=1 |
| CCG027007.1 | 1049 | 114  | 388 | 4.66973284 | 12.93023011 | 1.469336032  | Up   | 8.48E-14  | 2.70E-13  | AAEL007647-PA OS=Aedes aegypti GN=AAEL007647 PE=4 SV=1            |
| CCG003837.1 | 1458 | 670  | 388 | 19.7460372 | 9.303025643 | -1.085791239 | Down | 1.71E-33  | 7.35E-33  | AAEL001699-PA OS=Aedes aegypti GN=AAEL001699 PE=4 SV=1            |
| CCG006390.1 | 777  | 713  | 388 | 39.4304    | 17.45664271 | -1.17553222  | Down | 3.52E-40  | 1.57E-39  | Protein OS=Culex quinquefasciatus                                 |
| CCG019541.1 | 1014 | 38   | 389 | 1.61030564 | 13.41101545 | 3.058012035  | Up   | 4.26E-14  | 1.45E-13  | AAEL008716-PA OS=Aedes aegypti GN=AAEL008716 PE=4 SV=1            |
| CCG023905.2 | 663  | 52   | 389 | 3.37017526 | 20.5109648  | 2.605499831  | Up   | 0         | 0         | AAEL001871-PA OS=Aedes aegypti GN=AAEL001871 PE=4 SV=1            |
| CCG008308.1 | 663  | 59   | 389 | 3.8238527  | 20.5109648  | 2.423296499  | Up   | 0         | 0         | Dacapo OS=Aedes albopictus PE=2 SV=1                              |
| CCG006921.1 | 830  | 67   | 389 | 3.46864123 | 16.38405984 | 2.239850358  | Up   | 0         | 0         | AAEL004448-PA OS=Aedes aegypti GN=AAEL004448 PE=4 SV=1            |
| CCG019035.1 | 927  | 73   | 389 | 3.38380866 | 14.66965444 | 2.11611499   | Up   | 0         | 0         | AAEL004900-PA OS=Aedes aegypti GN=AAEL004900 PE=3 SV=1            |
| CCG024275.1 | 1482 | 74   | 389 | 2.14558729 | 9.175957938 | 2.096486183  | Up   | 0         | 0         | AAEL014397-PA OS=Aedes aegypti GN=AAEL014397 PE=4 SV=1            |
| CCG004930.1 | 1203 | 80   | 389 | 2.85750521 | 11.30404793 | 1.984011454  | Up   | 0         | 0         | AAEL012040-PA OS=Aedes aegypti GN=AAEL012040 PE=4 SV=1            |
| CCG020971.1 | 378  | 89   | 389 | 10.1172126 | 35.97558112 | 1.830206118  | Up   | 0         | 0         | AAEL009372-PA OS=Aedes aegypti GN=AAEL009372 PE=4 SV=1            |

|             |      |     |     |            |             |              |      |          |          |                                                                                  |
|-------------|------|-----|-----|------------|-------------|--------------|------|----------|----------|----------------------------------------------------------------------------------|
| CCG003915.1 | 593  | 93  | 389 | 6.73892971 | 22.93215795 | 1.766780738  | Up   | 4.04E-14 | 1.38E-13 | AAEL005705-PA OS=Aedes aegypti GN=AAEL005705 PE=4 SV=1                           |
| CCG020634.1 | 936  | 102 | 389 | 4.68259928 | 14.52860007 | 1.633514207  | Up   | 0        | 0        | AAEL001405-PA OS=Aedes aegypti GN=AAEL001405 PE=4 SV=1                           |
| CCG026690.1 | 1106 | 744 | 389 | 28.9054996 | 12.29545178 | -1.233219262 | Down | 4.85E-45 | 2.21E-44 | AAEL010592-PA OS=Aedes aegypti GN=AAEL010592 PE=4 SV=1                           |
| CCG013552.1 | 1182 | 22  | 390 | 0.79977509 | 11.5344568  | 3.850211899  | Up   | 8.38E-11 | 1.80E-10 | AAEL000287-PA (Fragment) OS=Aedes aegypti GN=AAEL000287 PE=4 SV=1                |
| CCG004315.1 | 1083 | 32  | 390 | 1.26965051 | 12.58885313 | 3.309643518  | Up   | 1.77E-13 | 5.17E-13 | AAEL006547-PA OS=Aedes aegypti GN=AAEL006547 PE=2 SV=1                           |
| CCG025639.1 | 2271 | 46  | 390 | 0.87036891 | 6.00340288  | 2.786081562  | Up   | 3.40E-14 | 1.18E-13 | AAEL014110-PA OS=Aedes aegypti GN=AAEL014110 PE=4 SV=1                           |
| CCG019372.1 | 597  | 53  | 390 | 3.81473356 | 22.83706523 | 2.581723063  | Up   | 0        | 0        | AAEL007877-PA OS=Aedes aegypti GN=AAEL007877 PE=4 SV=1                           |
| CCG014283.1 | 867  | 108 | 390 | 5.3526313  | 15.7251764  | 1.554756015  | Up   | 0        | 0        | AAEL015082-PA (Fragment) OS=Aedes aegypti GN=AAEL015082 PE=4 SV=1                |
| CCG027490.1 | 2681 | 111 | 390 | 1.77905279 | 5.085314413 | 1.515227651  | Up   | 0        | 0        | AAEL002248-PA (Fragment) OS=Aedes aegypti GN=AAEL002248 PE=4 SV=1                |
| CCG002492.1 | 922  | 114 | 390 | 5.31296068 | 14.78712358 | 1.476753503  | Up   | 8.48E-14 | 2.70E-13 | -                                                                                |
| CCG010836.1 | 1275 | 132 | 390 | 4.44863135 | 10.69311995 | 1.265249398  | Up   | 1.46E-13 | 4.36E-13 | AAEL003125-PA OS=Aedes aegypti GN=AAEL003125 PE=3 SV=1                           |
| CCG015275.1 | 1221 | 137 | 390 | 4.82133795 | 11.16603435 | 1.211611435  | Up   | 2.90E-13 | 8.03E-13 | AAEL005103-PA OS=Aedes aegypti GN=AAEL005103 PE=4 SV=1                           |
| CCG007206.1 | 1956 | 31  | 391 | 0.68101318 | 6.988080889 | 3.359141691  | Up   | 2.40E-13 | 6.76E-13 | Putative uncharacterized protein OS=Daphnia pulex GN=DAPPUDRAFT_311987 PE=4 SV=1 |
| CCG008311.1 | 2844 | 64  | 391 | 0.96697012 | 4.806148459 | 2.313338001  | Up   | 0        | 0        | AAEL003562-PA OS=Aedes aegypti GN=AAEL003562 PE=4 SV=1                           |
| CCG017062.1 | 4106 | 76  | 391 | 0.79534823 | 3.328954266 | 2.065410488  | Up   | 0        | 0        | AAEL009531-PA OS=Aedes aegypti GN=AAEL009531 PE=4 SV=1                           |

|             |      |      |     |            |             |              |      |          |          |                                                                                          |
|-------------|------|------|-----|------------|-------------|--------------|------|----------|----------|------------------------------------------------------------------------------------------|
| CCG020541.1 | 2988 | 102  | 391 | 1.46683833 | 4.574526847 | 1.640912659  | Up   | 0        | 0        | AAEL013167-PA OS=Aedes aegypti GN=AAEL013167 PE=4 SV=1                                   |
| CCG021399.1 | 1187 | 132  | 391 | 4.77843721 | 11.51532116 | 1.268943882  | Up   | 1.46E-13 | 4.36E-13 | -                                                                                        |
| CCG014038.1 | 774  | 145  | 391 | 8.04988568 | 17.65980132 | 1.133428911  | Up   | 0        | 0        | AAEL013197-PA OS=Aedes aegypti GN=AAEL013197 PE=4 SV=1                                   |
| CCG008236.1 | 1361 | 905  | 391 | 28.5728213 | 10.04311993 | -1.508435981 | Down | 1.42E-73 | 7.09E-73 | Putative uncharacterized protein OS=Culex quinquefasciatus GN=CpipJ_CPIJ010714 PE=4 SV=1 |
| CCG028232.1 | 1140 | 2492 | 391 | 93.9303322 | 11.99007563 | -2.969750352 | Down | 0        | 0        | AAEL012556-PA OS=Aedes aegypti GN=AAEL012556 PE=4 SV=1                                   |
| CCG022827.1 | 753  | 51   | 392 | 2.91030075 | 18.19873107 | 2.644597706  | Up   | 0        | 0        | Phosphatase and actin regulator OS=Culex quinquefasciatus GN=CpipJ_CPIJ018341 PE=4 SV=1  |
| CCG003477.1 | 1488 | 58   | 392 | 1.67489557 | 9.209438505 | 2.459042053  | Up   | 0        | 0        | AAEL013014-PA OS=Aedes aegypti GN=AAEL013014 PE=4 SV=1                                   |
| CCG019518.1 | 405  | 139  | 392 | 14.7476373 | 33.83615925 | 1.198081975  | Up   | 1.46E-13 | 4.37E-13 | AAEL008044-PA OS=Aedes aegypti GN=AAEL008044 PE=4 SV=1                                   |
| CCG019446.1 | 3393 | 150  | 392 | 1.8996346  | 4.038798849 | 1.088204357  | Up   | 0        | 0        | Pol-like protein OS=Aedes aegypti PE=4 SV=1                                              |
| CCG003793.1 | 1596 | 792  | 392 | 21.3233269 | 8.586243418 | -1.312333572 | Down | 1.44E-52 | 6.77E-52 | AAEL001920-PA OS=Aedes aegypti GN=AAEL001920 PE=4 SV=1                                   |
| CCG027245.1 | 1208 | 5    | 393 | 0.17785486 | 11.37301554 | 5.998770611  | Up   | 1.59E-05 | 2.76E-05 | AAEL007829-PA (Fragment) OS=Aedes aegypti GN=AAEL007829 PE=4 SV=1                        |
| CCG003177.2 | 1221 | 32   | 393 | 1.12615193 | 11.25192692 | 3.320698706  | Up   | 1.77E-13 | 5.16E-13 | AAEL005406-PA OS=Aedes aegypti GN=AAEL005406 PE=4 SV=1                                   |
| CCG018648.1 | 1125 | 49   | 393 | 1.87157066 | 12.21209135 | 2.705988862  | Up   | 0        | 0        | AAEL013921-PA OS=Aedes aegypti GN=AAEL013921 PE=4 SV=1                                   |
| CCG017323.2 | 777  | 57   | 393 | 3.15221991 | 17.68159945 | 2.487808692  | Up   | 0        | 0        | -                                                                                        |
| CCG019389.1 | 1512 | 123  | 393 | 3.49555381 | 9.086377494 | 1.378184201  | Up   | 0        | 0        | tRNA pseudouridine synthase OS=Aedes aegypti GN=AAEL007354 PE=3 SV=1                     |
| CCG019331.1 | 3705 | 129  | 393 | 1.49611222 | 3.708124905 | 1.309471451  | Up   | 0        | 0        | AAEL007127-PA (Fragment) OS=Aedes aegypti GN=AAEL007127 PE=4 SV=1                        |



|             |       |      |     |            |             |              |      |          |          |                                                                                                                   |
|-------------|-------|------|-----|------------|-------------|--------------|------|----------|----------|-------------------------------------------------------------------------------------------------------------------|
| CCG017527.1 | 15291 | 997  | 393 | 2.80170201 | 0.898476409 | -1.640750988 | Down | 2.71E-91 | 1.41E-90 | AAEL010027-PA OS=Aedes aegypti GN=AAEL010027 PE=4 SV=1                                                            |
| CCG021649.1 | 1388  | 2432 | 393 | 75.2899096 | 9.898128798 | -2.927228807 | Down | 0        | 0        | AAEL000354-PA OS=Aedes aegypti GN=AAEL000354 PE=4 SV=1                                                            |
| CCG005228.1 | 432   | 18   | 394 | 1.79040561 | 31.88324317 | 4.154440022  | Up   | 1.62E-09 | 3.33E-09 | AAEL000555-PA OS=Aedes aegypti GN=AAEL008535 PE=4 SV=1                                                            |
| CCG020843.1 | 1347  | 62   | 394 | 1.97782    | 10.22536084 | 2.370168713  | Up   | 0        | 0        | Uncharacterized protein OS=Anopheles darlingi GN=AND_17290 PE=4 SV=1                                              |
| CCG019736.1 | 708   | 87   | 394 | 5.28017925 | 19.45418227 | 1.881421527  | Up   | 0        | 0        | -                                                                                                                 |
| CCG016861.1 | 1450  | 90   | 394 | 2.66708698 | 9.49900762  | 1.832511927  | Up   | 0        | 0        | AAEL003649-PA OS=Aedes aegypti GN=AAEL003649 PE=4 SV=1                                                            |
| CCG019574.1 | 1521  | 92   | 394 | 2.5990898  | 9.055595692 | 1.800803067  | Up   | 1.44E-14 | 5.12E-14 | AAEL001787-PA OS=Aedes aegypti GN=AAEL001787 PE=4 SV=1                                                            |
| CCG013767.1 | 1044  | 101  | 394 | 4.15703371 | 13.19306614 | 1.666153541  | Up   | 0        | 0        | AAEL011338-PA OS=Aedes aegypti GN=AAEL011338 PE=4 SV=1                                                            |
| CCG021562.1 | 876   | 114  | 394 | 5.59195176 | 15.72324321 | 1.491475009  | Up   | 8.48E-14 | 2.70E-13 | Cleavage and polyadenylation specificity factor subunit 4 OS=Culex quinquefasciatus GN=CpipJ_CPIJ009192 PE=4 SV=1 |
| CCG015596.1 | 780   | 784  | 394 | 43.1900922 | 17.6584116  | -1.290344821 | Down | 9.59E-51 | 4.48E-50 | AAEL003716-PA OS=Aedes aegypti GN=AAEL003716 PE=2 SV=1                                                            |
| CCG023125.1 | 696   | 25   | 395 | 1.54345311 | 19.83982662 | 3.684165857  | Up   | 9.32E-12 | 2.08E-11 | AAEL011866-PA OS=Aedes aegypti GN=AAEL011866 PE=4 SV=1                                                            |
| CCG002578.1 | 717   | 62   | 395 | 3.71565348 | 19.25874383 | 2.373825736  | Up   | 0        | 0        | AAEL014041-PA OS=Aedes aegypti GN=AAEL014041 PE=4 SV=1                                                            |
| CCG002295.1 | 3477  | 77   | 395 | 0.95158745 | 3.971388934 | 2.061235506  | Up   | 0        | 0        | AAEL003438-PA OS=Aedes aegypti GN=AAEL003438 PE=4 SV=1                                                            |
| CCG005517.1 | 735   | 87   | 395 | 5.08621348 | 18.78710112 | 1.885078551  | Up   | 0        | 0        | AAEL006172-PA OS=Aedes aegypti GN=AAEL006172 PE=4 SV=1                                                            |
| CCG003520.1 | 1406  | 143  | 395 | 4.37032151 | 9.8211375   | 1.16815071   | Up   | 0        | 0        | AAEL014512-PA (Fragment) OS=Aedes aegypti GN=AAEL014512 PE=4 SV=1                                                 |
| CCG017777.1 | 615   | 158  | 395 | 11.039379  | 22.45287695 | 1.024241299  | Up   | 0        | 0        | Male specific 1 protein OS=Aedes aegypti GN=DSXM1 PE=2 SV=1                                                       |

|             |       |      |     |            |             |              |      |           |            |                                                                                                                           |
|-------------|-------|------|-----|------------|-------------|--------------|------|-----------|------------|---------------------------------------------------------------------------------------------------------------------------|
| CCG016414.1 | 3621  | 657  | 395 | 7.796497   | 3.81345466  | -1.031727513 | Down | 2.32E-30  | 9.78E-30   | AAEL004678-PA OS=Aedes aegypti GN=AAEL004678 PE=4 SV=1                                                                    |
| CCG010647.1 | 389   | 2    | 396 | 0.22092409 | 35.58734602 | 7.331669824  | Up   | 9.36E-05  | 0.00015353 | Chromosome undetermined SCAF14565, whole genome shotgun sequence OS=Tetraodon nigroviridis GN=GSTENG00016696001 PE=3 SV=1 |
| CCG000834.1 | 638   | 116  | 396 | 7.81267902 | 21.69824076 | 1.473688829  | Up   | 1.16E-13  | 3.59E-13   | AAEL009089-PA OS=Aedes aegypti GN=AAEL009089 PE=4 SV=1                                                                    |
| CCG023129.1 | 2448  | 37   | 397 | 0.64946086 | 5.669295702 | 3.125855035  | Up   | 5.17E-14  | 1.74E-13   | Ribonuclease P/MKP protein subunit POP1 OS=Culex quinquefasciatus GN=CpipJ_CPIJ007891 PE=4 SV=1                           |
| CCG017197.1 | 1395  | 91   | 397 | 2.80304362 | 9.948699555 | 1.827513761  | Up   | 0         | 0          | AAEL002329-PA OS=Aedes aegypti GN=AAEL002329 PE=4 SV=1                                                                    |
| CCG026724.1 | 1074  | 126  | 397 | 5.04114205 | 12.92219356 | 1.358028477  | Up   | 1.34E-13  | 4.06E-13   | AAEL005093-PA OS=Aedes aegypti GN=CLIPB46 PE=3 SV=1                                                                       |
| CCG000376.1 | 792   | 136  | 397 | 7.3786413  | 17.52327762 | 1.24784556   | Up   | 1.70E-13  | 4.99E-13   | AAEL005036-PA OS=Aedes aegypti GN=AAEL005036 PE=4 SV=1                                                                    |
| CCG013950.1 | 23081 | 689  | 397 | 1.28270643 | 0.60129266  | -1.093051772 | Down | 9.41E-35  | 4.07E-34   | AAEL008894-PA OS=Aedes aegypti GN=AAEL008894 PE=4 SV=1                                                                    |
| CCG025148.1 | 23271 | 880  | 397 | 1.62491369 | 0.596383304 | -1.446051313 | Down | 2.71E-67  | 1.33E-66   | AAEL002172-PA OS=Aedes aegypti GN=AAEL002172 PE=4 SV=1                                                                    |
| CCG013374.1 | 969   | 1702 | 397 | 75.4741881 | 14.32243125 | -2.397706921 | Down | 2.49E-255 | 1.54E-254  | AAEL005337-PA OS=Aedes aegypti GN=AAEL005337 PE=4 SV=1                                                                    |
| CCG005495.1 | 1488  | 35   | 398 | 1.01071284 | 9.350399298 | 3.209654807  | Up   | 6.39E-14  | 2.11E-13   | Stm1 cell tumor OS=Culex quinquefasciatus GN=CpipJ_CPIJ003969 PE=4 SV=1                                                   |
| CCG017044.1 | 825   | 53   | 398 | 2.76047992 | 16.86472019 | 2.61101737   | Up   | 0         | 0          | AAEL008790-PA OS=Aedes aegypti GN=AAEL008790 PE=4 SV=1                                                                    |
| CCG011228.1 | 864   | 73   | 398 | 3.63054471 | 16.10346546 | 2.149113265  | Up   | 0         | 0          | AAEL010343-PA (Fragment) OS=Aedes aegypti GN=AAEL010343 PE=4 SV=1                                                         |

|             |      |      |     |            |             |              |      |           |           |                                                                                           |
|-------------|------|------|-----|------------|-------------|--------------|------|-----------|-----------|-------------------------------------------------------------------------------------------|
| CCG025127.1 | 429  | 3798 | 398 | 380.417371 | 32.43215421 | -3.552086366 | Down | 0         | 0         | Putative salivary odorant binding protein 1 OS=Culex quinquefasciatus PE=2 SV=1           |
| CCG007264.1 | 1116 | 70   | 399 | 2.69523425 | 12.49852368 | 2.213275123  | Up   | 0         | 0         | AAEL012414-PA OS=Aedes aegypti GN=AAEL012414 PE=4 SV=1                                    |
| CCG023888.1 | 7149 | 1218 | 399 | 7.32090317 | 1.951091402 | -1.907740278 | Down | 5.71E-137 | 3.20E-136 | AAEL001803-PA (Fragment) OS=Aedes aegypti GN=AAEL001803 PE=4 SV=1                         |
| CCG017693.1 | 1008 | 1928 | 399 | 82.1881432 | 13.83765122 | -2.570331196 | Down | 0         | 0         | AAEL010783-PA OS=Aedes aegypti GN=AAEL010783 PE=3 SV=1                                    |
| CCG026736.1 | 2743 | 84   | 400 | 1.31587959 | 5.097816518 | 1.953851971  | Up   | 0         | 0         | AAEL006317-PA OS=Aedes aegypti GN=AAEL006317 PE=4 SV=1                                    |
| CCG008321.1 | 1437 | 99   | 400 | 2.96033662 | 9.730905156 | 1.716812774  | Up   | 0         | 0         | AAEL013521-PA OS=Aedes aegypti GN=AAEL013521 PE=3 SV=1                                    |
| CCG003656.1 | 2193 | 128  | 400 | 2.50803741 | 6.376338673 | 1.346169394  | Up   | 4.15E-14  | 1.42E-13  | AAEL011047-PA (Fragment) OS=Aedes aegypti GN=AAEL011047 PE=4 SV=1                         |
| CCG017437.1 | 672  | 986  | 400 | 63.0478547 | 20.80849808 | -1.599274443 | Down | 4.60E-87  | 2.37E-86  | Putative uncharacterized protein OS=Culex quinquefasciatus GN=CpipJ_CPIJ001349 PE=4 SV=1  |
| CCG022081.1 | 1104 | 1301 | 400 | 50.6373412 | 12.66604231 | -1.999235853 | Down | 1.36E-155 | 7.78E-155 | AAEL001261-PA OS=Aedes aegypti GN=AAEL001261 PE=4 SV=1                                    |
| CCG014058.1 | 2428 | 2250 | 400 | 39.8195646 | 5.759188925 | -2.789539893 | Down | 0         | 0         | AAEL008028-PA OS=Aedes aegypti GN=AAEL008028 PE=4 SV=1                                    |
| CCG002538.1 | 1233 | 29   | 401 | 1.01064258 | 11.36923681 | 3.491790635  | Up   | 6.66E-13  | 1.69E-12  | AAEL001939-PA OS=Aedes aegypti GN=AAEL001939 PE=4 SV=1                                    |
| CCG023116.1 | 7988 | 83   | 401 | 0.44648072 | 1.754915997 | 1.974732199  | Up   | 1.32E-13  | 4.02E-13  | AAEL014263-PA OS=Aedes aegypti GN=AAEL014263 PE=4 SV=1                                    |
| CCG026306.1 | 830  | 116  | 401 | 6.00540869 | 16.88948071 | 1.491790635  | Up   | 1.16E-13  | 3.59E-13  | Phosphataseppt regulatory subunit OS=Culex quinquefasciatus GN=CpipJ_CPIJ003122 PE=4 SV=1 |
| CCG014446.1 | 1152 | 134  | 401 | 4.99821566 | 12.16863627 | 1.28368244   | Up   | 0         | 0         | AAEL014712-PA OS=Aedes aegypti GN=AAEL014712 PE=4 SV=1                                    |
| CCG012745.1 | 464  | 999  | 401 | 92.5145795 | 30.21178661 | -1.614569238 | Down | 2.13E-89  | 1.11E-88  | AAEL004972-PA OS=Aedes aegypti GN=AAEL004972 PE=4 SV=1                                    |

|             |       |      |     |            |             |              |      |           |            |                                                                                                                                          |
|-------------|-------|------|-----|------------|-------------|--------------|------|-----------|------------|------------------------------------------------------------------------------------------------------------------------------------------|
| CCG024624.1 | 398   | 1    | 402 | 0.10796416 | 35.30961624 | 8.353364895  | Up   | 0.000587  | 0.00091541 | Chromosome undetermined<br>SCAF14565, whole genome<br>shotgun sequence OS=Tetraodon<br>nigroviridis<br>GN=GSTENG00016696001 PE=3<br>SV=1 |
| CCG026310.1 | 903   | 81   | 402 | 3.85442802 | 15.56282089 | 2.013514892  | Up   | 4.46E-14  | 1.51E-13   | AAEL003151-FA OS=Aedes<br>aegypti GN=AAEL003151 PE=4<br>SV=1                                                                             |
| CCG021465.1 | 1149  | 86   | 402 | 3.21618553 | 12.23083313 | 1.92710014   | Up   | 0         | 0          | AAEL012211-FA OS=Aedes<br>aegypti GN=AAEL012211 PE=4<br>SV=1                                                                             |
| CCG024178.1 | 1245  | 2    | 403 | 0.06902769 | 11.31581168 | 7.356949232  | Up   | 9.36E-05  | 0.00015346 | AAEL015402-FA OS=Aedes<br>aegypti GN=AAEL015402 PE=4<br>SV=1                                                                             |
| CCG005017.1 | 810   | 69   | 403 | 3.6603848  | 17.39282165 | 2.248424776  | Up   | 0         | 0          | AAEL014038-FA OS=Aedes<br>aegypti GN=AAEL014038 PE=3<br>SV=1                                                                             |
| CCG027722.1 | 10348 | 849  | 403 | 3.52544498 | 1.361440427 | -1.372671511 | Down | 3.74E-60  | 1.80E-59   | AAEL006808-FA OS=Aedes<br>aegypti GN=AAEL006808 PE=4<br>SV=1                                                                             |
| CCG007777.1 | 4587  | 31   | 404 | 0.29039934 | 3.078950036 | 3.406328376  | Up   | 2.40E-13  | 6.76E-13   | Putative uncharacterized protein<br>OS=Culex quinquefasciatus<br>GN=CpipJ_CPIJ010464 PE=4<br>SV=1                                        |
| CCG016418.2 | 2184  | 60   | 404 | 1.18048721 | 6.466640941 | 2.453634091  | Up   | 0         | 0          | AAEL004136-FA OS=Aedes<br>aegypti GN=AAEL004136 PE=4<br>SV=1                                                                             |
| CCG014375.1 | 1339  | 74   | 404 | 2.37472768 | 10.54753086 | 2.151071321  | Up   | 0         | 0          | AAEL009087-FA OS=Aedes<br>aegypti GN=AAEL009087 PE=4<br>SV=1                                                                             |
| CCG001317.1 | 4845  | 122  | 404 | 1.08200364 | 2.914993564 | 1.429787349  | Up   | 8.04E-14  | 2.58E-13   | AAEL001089-FA OS=Aedes<br>aegypti GN=AAEL001089 PE=4<br>SV=1                                                                             |
| CCG027281.1 | 1061  | 146  | 404 | 5.91289468 | 13.31116288 | 1.170700128  | Up   | 9.33E-15  | 3.34E-14   | AAEL007885-FA OS=Aedes<br>aegypti GN=AAEL007885 PE=4<br>SV=1                                                                             |
| CCG010993.1 | 1125  | 100  | 405 | 3.81953197 | 12.58497964 | 1.720235112  | Up   | 0         | 0          | AAEL008459-FA OS=Aedes<br>aegypti GN=AAEL008459 PE=4<br>SV=1                                                                             |
| CCG000775.1 | 1301  | 114  | 405 | 3.76521887 | 10.88247663 | 1.531201287  | Up   | 8.48E-14  | 2.70E-13   | Quinone oxidoreductase<br>OS=Culex quinquefasciatus<br>GN=CpipJ_CPIJ019133 PE=4<br>SV=1                                                  |
| CCG009341.1 | 1357  | 138  | 405 | 4.36980352 | 10.433384   | 1.255566845  | Up   | 1.49E-13  | 4.45E-13   | AAEL003092-FA OS=Aedes<br>aegypti GN=AAEL003092 PE=4<br>SV=1                                                                             |
| CCG007553.1 | 1914  | 1285 | 405 | 28.8485418 | 7.39712753  | -1.963461342 | Down | 4.53E-150 | 2.57E-149  | -                                                                                                                                        |

|             |      |      |     |            |             |              |      |           |           |                                                                                          |
|-------------|------|------|-----|------------|-------------|--------------|------|-----------|-----------|------------------------------------------------------------------------------------------|
| CCG016870.1 | 1194 | 26   | 406 | 0.93568936 | 11.88698523 | 3.667209403  | Up   | 4.60E-12  | 1.05E-11  | AAEL005326-PA OS=Aedes aegypti GN=AAEL005326 PE=4 SV=1                                   |
| CCG000406.1 | 2657 | 99   | 406 | 1.60105522 | 5.341761524 | 1.738292501  | Up   | 0         | 0         | AAEL004545-PA (Fragment) OS=Aedes aegypti GN=AAEL004545 PE=4 SV=1                        |
| CCG006302.1 | 471  | 141  | 406 | 12.8635511 | 30.13388613 | 1.228097769  | Up   | 0         | 0         | AAEL004726-PA OS=Aedes aegypti GN=AAEL004726 PE=4 SV=1                                   |
| CCG010438.1 | 522  | 162  | 406 | 13.3354349 | 27.18977082 | 1.027799118  | Up   | 0         | 0         | AAEL007589-PA OS=Aedes aegypti GN=AAEL007589 PE=4 SV=1                                   |
| CCG028151.1 | 5484 | 1092 | 406 | 8.55633665 | 2.588085407 | -1.72510802  | Down | 3.90E-107 | 2.08E-106 | AAEL012889-PA (Fragment) OS=Aedes aegypti GN=AAEL012889 PE=4 SV=1                        |
| CCG003413.1 | 1599 | 31   | 407 | 0.83305927 | 8.89807295  | 3.417001878  | Up   | 2.40E-13  | 6.76E-13  | Putative uncharacterized protein OS=Culex quinquefasciatus GN=CpipJ_CPIJ003716 PE=4 SV=1 |
| CCG007411.1 | 627  | 79   | 407 | 5.4140495  | 22.69221475 | 2.06741744   | Up   | 0         | 0         | AAEL004859-PA (Fragment) OS=Aedes aegypti GN=AAEL004859 PE=4 SV=1                        |
| CCG015246.1 | 870  | 128  | 407 | 6.32198394 | 16.35404442 | 1.371198188  | Up   | 4.15E-14  | 1.42E-13  | AAEL002686-PA OS=Aedes aegypti GN=AAEL002686 PE=3 SV=1                                   |
| CCG028244.1 | 1467 | 162  | 407 | 4.74512407 | 9.69871755  | 1.031348185  | Up   | 0         | 0         | AGAP006038-PA OS=Anopheles gambiae GN=AGAP006038 PE=4 SV=4                               |
| CCG007005.1 | 2313 | 1289 | 407 | 23.9463847 | 6.151326695 | -1.96083836  | Down | 2.90E-150 | 1.65E-149 | AAEL014864-PA OS=Aedes aegypti GN=AAEL014864 PE=4 SV=1                                   |
| CCG016753.1 | 1086 | 1473 | 407 | 58.2821539 | 13.1013063  | -2.153343527 | Down | 1.07E-193 | 6.36E-193 | -                                                                                        |
| CCG005178.3 | 2430 | 105  | 408 | 1.85671693 | 5.869537828 | 1.660493028  | Up   | 0         | 0         | Scarfoid attachment factor B OS=Culex quinquefasciatus GN=CpipJ_CPIJ017179 PE=1 SV=1     |
| CCG000583.2 | 1677 | 116  | 408 | 2.97226548 | 8.505054814 | 1.516757551  | Up   | 1.16E-13  | 3.59E-13  | AAEL006508-PA OS=Aedes aegypti GN=AAEL006508 PE=4 SV=1                                   |
| CCG003538.1 | 2631 | 2077 | 408 | 33.9217555 | 5.421123878 | -2.645546955 | Down | 0         | 0         | AAEL002070-PA (Fragment) OS=Aedes aegypti GN=AAEL002070 PE=4 SV=1                        |

|             |      |       |     |            |             |              |      |          |          |                                                                                                      |
|-------------|------|-------|-----|------------|-------------|--------------|------|----------|----------|------------------------------------------------------------------------------------------------------|
| CCG021900.1 | 939  | 47    | 409 | 2.15077479 | 15.22676805 | 2.823681385  | Up   | 0        | 0        | AAEL008691-PA OS=Aedes aegypti GN=AAEL008691 PE=4 SV=1                                               |
| CCG018751.1 | 1773 | 51    | 409 | 1.23601605 | 8.064261252 | 2.705844895  | Up   | 0        | 0        | AAEL008658-PA OS=Aedes aegypti GN=AAEL008658 PE=4 SV=1                                               |
| CCG012418.1 | 1239 | 107   | 409 | 3.71086489 | 11.53989927 | 1.63680325   | Up   | 0        | 0        | AAEL007239-PA OS=Aedes aegypti GN=AAEL007239 PE=4 SV=1                                               |
| CCG025000.1 | 670  | 853   | 409 | 54.7062442 | 21.34020179 | -1.358131695 | Down | 1.79E-59 | 8.61E-59 | AAEL006918-PB OS=Aedes aegypti GN=AAEL006918 PE=4 SV=1                                               |
| CCG005323.1 | 2689 | 11731 | 409 | 187.459262 | 5.317194199 | -5.139768143 | Down | 0        | 0        | AGAP000113-PA (Fragment) OS=Anopheles gambiae GN=AgaP_AGAP000113 PE=4 SV=5                           |
| CCG005336.1 | 1040 | 54    | 410 | 2.23112084 | 13.78162834 | 2.626905801  | Up   | 0        | 0        | Dihydrodipicolinate reductase OS=Culex quinquefasciatus GN=CpipJ_CPIJ002390 PE=4 SV=1                |
| CCG016692.1 | 2100 | 96    | 410 | 1.96433073 | 6.82518737  | 1.796830803  | Up   | 0        | 0        | AAEL005634-PA OS=Aedes aegypti GN=AAEL005634 PE=4 SV=1                                               |
| CCG024392.1 | 522  | 117   | 410 | 9.63114741 | 27.45765034 | 1.511428584  | Up   | 9.44E-14 | 2.97E-13 | AAEL003401-PA OS=Aedes aegypti GN=AAEL003401 PE=4 SV=1                                               |
| CCG008416.2 | 1047 | 5621  | 410 | 230.690428 | 13.68948756 | -4.074817796 | Down | 0        | 0        | AAEL003067-PB OS=Aedes aegypti GN=AAEL003067 PE=4 SV=1                                               |
| CCG017379.1 | 591  | 29    | 411 | 2.10849798 | 24.31108588 | 3.527326792  | Up   | 6.66E-13 | 1.69E-12 | AAEL010150-PA OS=Aedes aegypti GN=AAEL010150 PE=4 SV=1                                               |
| CCG028530.1 | 1295 | 31    | 411 | 1.02861913 | 11.09486622 | 3.431111477  | Up   | 2.40E-13 | 6.77E-13 | Atfermis protein OS=Culex quinquefasciatus GN=CpipJ_CPIJ014048 PE=4 SV=1                             |
| CCG017311.1 | 2355 | 36    | 411 | 0.65686219 | 6.100998621 | 3.215382786  | Up   | 6.13E-14 | 2.03E-13 | AAEL002322-PA OS=Aedes aegypti GN=AAEL002322 PE=4 SV=1                                               |
| CCG016785.1 | 1905 | 49    | 411 | 1.10525827 | 7.542179398 | 2.770597943  | Up   | 0        | 0        | AAEL011664-PA OS=Aedes aegypti GN=AAEL011664 PE=4 SV=1                                               |
| CCG016932.1 | 4641 | 95    | 411 | 0.87957871 | 3.095852565 | 1.815452179  | Up   | 0        | 0        | ATYP4-binding cassette sub-family A member 3 OS=Culex quinquefasciatus GN=CpipJ_CPIJ004978 PE=3 SV=1 |

|             |       |      |     |            |             |              |      |           |           |                                                                   |
|-------------|-------|------|-----|------------|-------------|--------------|------|-----------|-----------|-------------------------------------------------------------------|
| CCG007948.1 | 10466 | 1782 | 411 | 7.31626859 | 1.37281213  | -2.413973834 | Down | 2.07E-269 | 1.29E-268 | AAEL005903-PA OS=Aedes aegypti GN=AAEL005903 PE=4 SV=1            |
| CCG016751.1 | 536   | 25   | 412 | 2.00418538 | 26.87091424 | 3.744957541  | Up   | 9.32E-12  | 2.08E-11  | AAEL004842-PA OS=Aedes aegypti GN=AAEL004842 PE=4 SV=1            |
| CCG013260.1 | 534   | 44   | 412 | 3.54057738 | 26.97155436 | 2.929382112  | Up   | 3.91E-14  | 1.34E-13  | AAEL009759-PA OS=Aedes aegypti GN=AAEL009759 PE=4 SV=1            |
| CCG018925.1 | 14914 | 94   | 412 | 0.27082976 | 0.965724154 | 1.834224879  | Up   | 0         | 0         | AAEL011396-PA OS=Aedes aegypti GN=AAEL011396 PE=4 SV=1            |
| CCG026852.1 | 1185  | 129  | 412 | 4.67771795 | 12.15427007 | 1.377586476  | Up   | 0         | 0         | Uricase OS=Aedes aegypti GN=UO PE=2 SV=1                          |
| CCG016856.2 | 1962  | 134  | 412 | 2.93473213 | 7.340881769 | 1.322724541  | Up   | 0         | 0         | AAEL014112-PA OS=Aedes aegypti GN=AAEL014112 PE=4 SV=1            |
| CCG003642.1 | 537   | 150  | 412 | 12.0027192 | 26.82087529 | 1.159995041  | Up   | 0         | 0         | AAEL006771-PA OS=Aedes aegypti GN=AAEL006771 PE=4 SV=1            |
| CCG009784.1 | 1325  | 152  | 412 | 4.92935823 | 10.87004531 | 1.140886218  | Up   | 8.39E-14  | 2.69E-13  | AAEL000562-PA OS=Aedes aegypti GN=AAEL000562 PE=4 SV=1            |
| CCG010001.1 | 1815  | 932  | 412 | 22.0648995 | 7.935432524 | -1.475372414 | Down | 2.68E-73  | 1.34E-72  | AAEL009038-PA (Fragment) OS=Aedes aegypti GN=AAEL009038 PE=4 SV=1 |
| CCG021923.1 | 1777  | 1084 | 412 | 26.2122635 | 8.105126635 | -1.69333531  | Down | 1.26E-103 | 6.73E-103 | AAEL000271-PA OS=Aedes aegypti GN=AAEL000271 PE=4 SV=1            |
| CCG018684.1 | 372   | 2467 | 412 | 284.963267 | 38.71723126 | -2.879728269 | Down | 0         | 0         | AAEL004829-PA OS=Aedes aegypti GN=AAEL004829 PE=4 SV=1            |
| CCG002380.1 | 1260  | 15   | 413 | 0.51154446 | 11.45854628 | 4.48542058   | Up   | 1.48E-08  | 2.93E-08  | AAEL003004-PA OS=Aedes aegypti GN=AAEL003004 PE=4 SV=1            |
| CCG011975.1 | 1719  | 55   | 414 | 1.37483153 | 8.419270846 | 2.614440448  | Up   | 0         | 0         | AAEL009187-PA OS=Aedes aegypti GN=AAEL009187 PE=4 SV=1            |
| CCG015700.1 | 2952  | 109  | 414 | 1.5866196  | 4.902685157 | 1.627615837  | Up   | 0         | 0         | AAEL004387-PA OS=Aedes aegypti GN=AAEL004387 PE=4 SV=1            |
| CCG016864.1 | 1011  | 125  | 414 | 5.31277629 | 14.31525874 | 1.430015877  | Up   | 2.35E-14  | 8.22E-14  | AAEL007105-PA OS=Aedes aegypti GN=AAEL007105 PE=4 SV=1            |
| CCG023434.1 | 1896  | 23   | 415 | 0.52125733 | 7.651732521 | 3.875718774  | Up   | 4.01E-11  | 8.67E-11  | AAEL009397-PA OS=Aedes aegypti GN=AAEL009397 PE=4 SV=1            |
| CCG021092.1 | 717   | 39   | 415 | 2.3372659  | 20.2338701  | 3.113878511  | Up   | 7.33E-14  | 2.38E-13  | AAEL008400-PA OS=Aedes aegypti GN=AAEL008400 PE=4 SV=1            |

|             |      |      |     |            |             |              |      |           |           |                                                                                          |
|-------------|------|------|-----|------------|-------------|--------------|------|-----------|-----------|------------------------------------------------------------------------------------------|
| CCG012728.1 | 2326 | 54   | 415 | 0.99757767 | 6.237181797 | 2.644393228  | Up   | 0         | 0         | AAEL008865-PA OS=Aedes aegypti GN=AAEL008865 PE=3 SV=1                                   |
| CCG024253.1 | 1494 | 82   | 415 | 2.35844594 | 9.710632437 | 2.041728725  | Up   | 0         | 0         | Uncharacterized protein OS=Danio rerio GN=BX005085.3 PE=1 SV=1                           |
| CCG003409.1 | 1242 | 133  | 415 | 4.60142891 | 11.68090568 | 1.343998295  | Up   | 9.90E-14  | 3.11E-13  | AAEL004420-PA OS=Aedes aegypti GN=AAEL004420 PE=4 SV=1                                   |
| CCG002505.1 | 2571 | 135  | 415 | 2.25628711 | 5.642817915 | 1.322465133  | Up   | 1.90E-13  | 5.49E-13  | AAEL002496-PA OS=Aedes aegypti GN=AAEL002496 PE=4 SV=1                                   |
| CCG019136.1 | 668  | 1127 | 415 | 72.4953457 | 21.71809111 | -1.73899107  | Down | 9.39E-112 | 5.06E-111 | AAEL002293-PA OS=Aedes aegypti GN=AAEL002293 PE=4 SV=1                                   |
| CCG012169.1 | 426  | 115  | 416 | 11.599811  | 34.13765995 | 1.557262871  | Up   | 6.13E-14  | 2.02E-13  | Putative uncharacterized protein OS=Culex quinquefasciatus GN=CpipJ_CPIJ005871 PE=4 SV=1 |
| CCG017372.1 | 732  | 120  | 416 | 7.04421879 | 19.86699882 | 1.495862326  | Up   | 0         | 0         | AAEL010419-PA OS=Aedes aegypti GN=AAEL010419 PE=4 SV=1                                   |
| CCG026897.2 | 1221 | 132  | 416 | 4.64537671 | 11.91043664 | 1.358358803  | Up   | 1.46E-13  | 4.36E-13  | AAEL001448-PA OS=Aedes aegypti GN=AAEL001448 PE=4 SV=1                                   |
| CCG021064.1 | 603  | 838  | 416 | 59.7158169 | 24.1171528  | -1.308053512 | Down | 3.02E-55  | 1.44E-54  | AAEL008054-PA OS=Aedes aegypti GN=AAEL008054 PE=4 SV=1                                   |
| CCG011764.1 | 5541 | 4398 | 416 | 34.1059182 | 2.624552091 | -3.699878967 | Down | 0         | 0         | AAEL011436-PA OS=Aedes aegypti GN=AAEL011436 PE=4 SV=1                                   |
| CCG027199.1 | 458  | 0    | 417 | 0.001      | 31.82882405 | 14.95804624  | Up   | 4.44E-16  | 1.65E-15  | Histone H2A OS=Aedes aegypti GN=AAEL003669 PE=3 SV=1                                     |
| CCG000563.1 | 1086 | 27   | 417 | 1.06830832 | 13.42320572 | 3.651329275  | Up   | 2.28E-12  | 5.41E-12  | AAEL013795-PA OS=Aedes aegypti GN=AAEL013795 PE=4 SV=1                                   |
| CCG017369.1 | 2133 | 38   | 417 | 0.76551801 | 6.834318525 | 3.158289264  | Up   | 4.26E-14  | 1.45E-13  | AAEL007211-PA OS=Aedes aegypti GN=AAEL007211 PE=4 SV=1                                   |
| CCG024267.1 | 717  | 48   | 417 | 2.87663495 | 20.33138273 | 2.821254277  | Up   | 5.35E-14  | 1.79E-13  | AAEL008038-PA OS=Aedes aegypti GN=AAEL008038 PE=4 SV=1                                   |
| CCG002386.1 | 1358 | 73   | 417 | 2.30986055 | 10.73461076 | 2.216392218  | Up   | 0         | 0         | AAEL010782-PA OS=Aedes aegypti GN=AAEL010782 PE=3 SV=1                                   |
| CCG010331.1 | 3849 | 1714 | 417 | 19.1348727 | 3.787373711 | -2.336934617 | Down | 2.99E-249 | 1.84E-248 | AAEL002583-PA OS=Aedes aegypti GN=TOLL7 PE=4 SV=1                                        |
| CCG008256.1 | 1332 | 4    | 418 | 0.12903824 | 10.97039016 | 6.409672336  | Up   | 2.95E-05  | 5.04E-05  | AAEL010627-PA OS=Aedes aegypti GN=AAEL010627 PE=4 SV=1                                   |



|             |      |      |     |            |             |              |      |          |          |                                                            |
|-------------|------|------|-----|------------|-------------|--------------|------|----------|----------|------------------------------------------------------------|
| CCG013026.1 | 1089 | 90   | 418 | 3.55121774 | 13.41832846 | 1.91781924   | Up   | 0        | 0        | AAEL014272-PA OS=Aedes aegypti GN=AAEL014272 PE=4 SV=1     |
| CCG017651.1 | 3423 | 117  | 418 | 1.46872888 | 4.268933594 | 1.539307616  | Up   | 9.44E-14 | 2.98E-13 | AAEL011978-PA OS=Aedes aegypti GN=AAEL011978 PE=4 SV=1     |
| CCG024355.1 | 594  | 160  | 418 | 11.5743393 | 24.60026884 | 1.087744241  | Up   | 4.24E-14 | 1.44E-13 | AAEL005313-PA OS=Aedes aegypti GN=AAEL005313 PE=4 SV=1     |
| CCG004542.1 | 4572 | 2317 | 418 | 21.7762194 | 3.19609792  | -2.768369993 | Down | 0        | 0        | AAEL008421-PA OS=Aedes aegypti GN=AAEL008421 PE=4 SV=1     |
| CCG027229.1 | 742  | 2686 | 418 | 155.548123 | 19.69347667 | -2.981571254 | Down | 0        | 0        | AAEL014944-PA OS=Aedes aegypti GN=SGP2D7 PE=2 SV=1         |
| CCG023633.1 | 1392 | 15   | 419 | 0.46303593 | 10.52264222 | 4.506229042  | Up   | 1.48E-08 | 2.93E-08 | AAEL007939-PA OS=Aedes aegypti GN=AAEL007939 PE=4 SV=1     |
| CCG014896.1 | 411  | 146  | 419 | 15.264188  | 35.63872985 | 1.223295079  | Up   | 9.33E-15 | 3.34E-14 | Ribosomal protein OS=Aedes aegypti GN=AAEL009613 PE=3 SV=1 |
| CCG019497.1 | 2685 | 167  | 419 | 2.67260547 | 5.455313954 | 1.029415345  | Up   | 1.62E-13 | 4.78E-13 | AAEL009404-PA OS=Aedes aegypti GN=AAEL009404 PE=4 SV=1     |
| CCG003795.1 | 492  | 776  | 419 | 67.7734026 | 29.77137798 | -1.186793205 | Down | 3.19E-44 | 1.45E-43 | AAEL001952-PA OS=Aedes aegypti GN=AAEL001952 PE=2 SV=1     |
| CCG022747.1 | 2253 | 1002 | 419 | 19.1103746 | 6.501339533 | -1.555547156 | Down | 5.55E-85 | 2.85E-84 | AAEL001207-PA OS=Aedes aegypti GN=AAEL001207 PE=4 SV=2     |
| CCG009744.1 | 1365 | 62   | 420 | 1.95173886 | 10.75639285 | 2.462362411  | Up   | 0        | 0        | AAEL005374-PA OS=Aedes aegypti GN=AAEL003374 PE=4 SV=1     |
| CCG009279.1 | 1179 | 107  | 420 | 3.89971298 | 12.45333015 | 1.675091735  | Up   | 0        | 0        | AAEL006286-PA OS=Aedes aegypti GN=AAEL006286 PE=4 SV=1     |
| CCG014462.1 | 270  | 129  | 420 | 20.5299843 | 54.37954165 | 1.405331466  | Up   | 0        | 0        | Activating transcription factor OS=Aedes aegypti PE=2 SV=1 |
| CCG003181.1 | 1761 | 58   | 421 | 1.41524396 | 8.357430165 | 2.562008632  | Up   | 0        | 0        | AAEL014483-PA OS=Aedes aegypti GN=AAEL014483 PE=4 SV=1     |
| CCG000387.1 | 1254 | 92   | 421 | 3.15248452 | 11.73639117 | 1.896427671  | Up   | 1.44E-14 | 5.12E-14 | AAEL010376-PA OS=Aedes aegypti GN=AAEL010376 PE=4 SV=1     |
| CCG003424.1 | 1098 | 126  | 421 | 4.93095315 | 13.40385658 | 1.442709703  | Up   | 1.34E-13 | 4.06E-13 | AAEL008850-PA OS=Aedes aegypti GN=AAEL008850 PE=4 SV=1     |
| CCG024082.1 | 1458 | 746  | 421 | 21.9858862 | 10.09426236 | -1.123042193 | Down | 4.23E-39 | 1.88E-38 | AAEL006542-PA OS=Aedes aegypti GN=AAEL006542 PE=4 SV=1     |

|             |      |      |     |            |             |              |      |          |          |                                                                                          |
|-------------|------|------|-----|------------|-------------|--------------|------|----------|----------|------------------------------------------------------------------------------------------|
| CCG000658.1 | 1230 | 1062 | 421 | 37.1006977 | 11.96539392 | -1.632578424 | Down | 1.96E-96 | 1.03E-95 | Possible mucin OS=Aedes aegypti PE=2 SV=1                                                |
| CCG022816.1 | 3568 | 3868 | 421 | 46.5826607 | 4.124841514 | -3.497382453 | Down | 0        | 0        | AAEL003135-PA OS=Aedes aegypti GN=AAEL003135 PE=4 SV=1                                   |
| CCG016906.1 | 1424 | 6700 | 421 | 202.175015 | 10.33527705 | -4.289955753 | Down | 0        | 0        | AAEL015304-PA OS=Aedes aegypti GN=AAEL015304 PE=4 SV=1                                   |
| CCG025737.1 | 441  | 0    | 422 | 0.001      | 33.45213786 | 15.02981079  | Up   | 4.44E-16 | 1.64E-15 | -                                                                                        |
| CCG017096.2 | 684  | 32   | 422 | 2.01027998 | 21.56782573 | 3.423412393  | Up   | 1.77E-13 | 5.17E-13 | AAEL003332-PA OS=Aedes aegypti GN=AAEL003332 PE=4 SV=1                                   |
| CCG019231.1 | 1679 | 94   | 422 | 2.40569092 | 8.786416199 | 1.868823541  | Up   | 0        | 0        | AAEL001778-PA OS=Aedes aegypti GN=AAEL001778 PE=4 SV=1                                   |
| CCG007829.1 | 1530 | 107  | 422 | 3.00507294 | 9.642086796 | 1.681945406  | Up   | 0        | 0        | AAEL005053-PA OS=Aedes aegypti GN=AAEL005053 PE=4 SV=1                                   |
| CCG021650.1 | 2472 | 135  | 422 | 2.34664813 | 5.967796439 | 1.346596795  | Up   | 1.90E-13 | 5.49E-13 | Putative uncharacterized protein OS=Culex quinquefasciatus GN=CpipJ_CPIJ000842 PE=4 SV=1 |
| CCG026949.1 | 973  | 146  | 422 | 6.4476683  | 15.16176033 | 1.233587834  | Up   | 9.33E-15 | 3.33E-14 | AAEL010250-PA OS=Aedes aegypti GN=AAEL010250 PE=4 SV=1                                   |
| CCG021744.1 | 1692 | 34   | 423 | 0.86345802 | 8.739569193 | 3.339364216  | Up   | 8.82E-14 | 2.79E-13 | AAEL008116-PA OS=Aedes aegypti GN=AAEL008116 PE=4 SV=1                                   |
| CCG008126.1 | 2547 | 64   | 423 | 1.07972635 | 5.805791549 | 2.426827057  | Up   | 0        | 0        | AAEL004200-PA OS=Aedes aegypti GN=AAEL004200 PE=3 SV=1                                   |
| CCG025895.2 | 959  | 96   | 423 | 4.30145414 | 15.41955274 | 1.841864556  | Up   | 0        | 0        | -                                                                                        |
| CCG006202.1 | 978  | 146  | 423 | 6.41470476 | 15.11999087 | 1.237002498  | Up   | 9.33E-15 | 3.34E-14 | AAEL006067-PA OS=Aedes aegypti GN=AAEL006067 PE=4 SV=1                                   |
| CCG011114.1 | 621  | 17   | 424 | 1.17630513 | 23.86845306 | 4.342770817  | Up   | 3.39E-09 | 6.89E-09 | Putative uncharacterized protein OS=Culex quinquefasciatus GN=CpipJ_CPIJ014666 PE=4 SV=1 |
| CCG013983.1 | 3288 | 41   | 424 | 0.53581482 | 4.508001628 | 3.072681654  | Up   | 1.02E-13 | 3.19E-13 | AAEL004243-PA OS=Aedes aegypti GN=AAEL004243 PE=4 SV=1                                   |
| CCG025303.1 | 822  | 42   | 424 | 2.19553389 | 18.03200651 | 3.037916236  | Up   | 7.66E-14 | 2.48E-13 | Clp-domain serine protease OS=Culex quinquefasciatus GN=CpipJ_CPIJ000615 PE=3 SV=1       |
| CCG013290.1 | 1547 | 47   | 424 | 1.30547998 | 9.581324726 | 2.875644807  | Up   | 0        | 0        | AAEL011362-PA OS=Aedes aegypti GN=AAEL011362 PE=4 SV=1                                   |

|             |      |      |     |            |             |              |      |           |           |                                                                                                            |
|-------------|------|------|-----|------------|-------------|--------------|------|-----------|-----------|------------------------------------------------------------------------------------------------------------|
| CCG011243.1 | 417  | 54   | 424 | 5.56442606 | 35.54510636 | 2.675346156  | Up   | 0         | 0         | Putative uncharacterized protein<br>OS=Culex quinquefasciatus<br>GN=CpipJ_CPIJ007523 PE=4<br>SV=1          |
| CCG025412.1 | 1560 | 92   | 424 | 2.53411255 | 9.501480353 | 1.906671702  | Up   | 1.44E-14  | 5.12E-14  | AAEL009240-PA OS=Aedes<br>aegypti GN=AAEL009246 PE=3<br>SV=1                                               |
| CCG018233.1 | 769  | 113  | 424 | 6.31414826 | 19.27478459 | 1.610054696  | Up   | 1.42E-13  | 4.26E-13  | AAEL008714-PA OS=Aedes<br>aegypti GN=AAEL008714 PE=4<br>SV=1                                               |
| CCG011168.2 | 2364 | 148  | 424 | 2.69015259 | 6.270012416 | 1.220780293  | Up   | 0         | 0         | Gastrin zinc finger protein<br>XLCGF8.2DB OS=Culex<br>quinquefasciatus<br>GN=CpipJ_CPIJ012331 PE=4<br>SV=1 |
| CCG013615.1 | 969  | 1608 | 424 | 71.3058135 | 15.29650088 | -2.220818033 | Down | 1.13E-219 | 6.86E-219 | AAEL013656-PA OS=Aedes<br>aegypti GN=AAEL013656 PE=4<br>SV=1                                               |
| CCG009808.1 | 3606 | 1894 | 424 | 22.5692394 | 4.110457391 | -2.456986957 | Down | 2.69E-292 | 1.69E-291 | AAEL005437-PA OS=Aedes<br>aegypti GN=AAEL005437 PE=4<br>SV=1                                               |
| CCG008322.1 | 1770 | 4713 | 424 | 114.416022 | 8.374186074 | -3.772196308 | Down | 0         | 0         | AAEL013526-PA OS=Aedes<br>aegypti GN=AAEL013526 PE=4<br>SV=1                                               |
| CCG001171.1 | 1314 | 21   | 425 | 0.68673092 | 11.30690078 | 4.041314812  | Up   | 1.76E-10  | 3.72E-10  | AAEL009401-PA OS=Aedes<br>aegypti GN=AAEL009401 PE=4<br>SV=1                                               |
| CCG007794.1 | 2385 | 70   | 425 | 1.26116622 | 6.229462318 | 2.304349218  | Up   | 0         | 0         | AAEL014631-PA OS=Aedes<br>aegypti GN=AAEL014631 PE=4<br>SV=1                                               |
| CCG025982.1 | 1996 | 85   | 425 | 1.82987347 | 7.443520856 | 2.024241299  | Up   | 0         | 0         | AAEL001996-PA OS=Aedes<br>aegypti GN=AAEL001996 PE=4<br>SV=1                                               |
| CCG005360.1 | 2595 | 707  | 425 | 11.7069759 | 5.72534398  | -1.03193417  | Down | 1.48E-32  | 6.33E-32  | AAEL010804-PA OS=Aedes<br>aegypti GN=AAEL010804 PE=4<br>SV=1                                               |
| CCG007479.1 | 415  | 895  | 425 | 92.6696686 | 35.80064489 | -1.372111637 | Down | 2.82E-63  | 1.37E-62  | AAEL002526-PA OS=Aedes<br>aegypti GN=AAEL002526 PE=4<br>SV=1                                               |
| CCG028061.1 | 2110 | 12   | 426 | 0.24437764 | 7.057926969 | 4.852060323  | Up   | 1.30E-07  | 2.49E-07  | AAEL000918-PA (Fragment)<br>OS=Aedes aegypti<br>GN=AAEL000918 PE=4 SV=2                                    |
| CCG007771.1 | 759  | 136  | 426 | 7.69945179 | 19.62085099 | 1.349559983  | Up   | 1.70E-13  | 4.99E-13  | AAEL009497-PA OS=Aedes<br>aegypti GN=AAEL009497 PE=4<br>SV=1                                               |
| CCG005113.1 | 2079 | 146  | 426 | 3.0175956  | 7.163167823 | 1.247198265  | Up   | 9.33E-15  | 3.34E-14  | AAEL001163-PA OS=Aedes<br>aegypti GN=AAEL001163 PE=4<br>SV=1                                               |

|             |      |      |     |            |             |              |      |          |          |                                                                                        |
|-------------|------|------|-----|------------|-------------|--------------|------|----------|----------|----------------------------------------------------------------------------------------|
| CCG018453.1 | 1475 | 157  | 426 | 4.57372768 | 10.09642434 | 1.142402075  | Up   | 0        | 0        | Delta-aminolevulinic acid dehydratase OS=Aedes aegypti GN=AAEL002304 PE=2 SV=1         |
| CCG000593.1 | 954  | 755  | 426 | 34.0064462 | 15.61029969 | -1.12331001  | Down | 1.45E-39 | 6.45E-39 | homeobox protein extradenticle OS=Culex quinquefasciatus GN=CpipJ_CPIJ008039 PE=3 SV=1 |
| CCG025568.1 | 2583 | 1016 | 426 | 16.9017617 | 5.765476541 | -1.551661863 | Down | 7.85E-86 | 4.04E-85 | AAEL011280-PA (Fragment) OS=Aedes aegypti GN=AAEL011280 PE=3 SV=1                      |
| CCG028339.1 | 2370 | 11   | 427 | 0.19943759 | 6.29838995  | 4.980973845  | Up   | 2.67E-07 | 5.03E-07 | AAEL000730-PA OS=Aedes aegypti GN=AAEL000730 PE=4 SV=1                                 |
| CCG000926.1 | 1473 | 27   | 427 | 0.78763261 | 10.1338657  | 3.685517961  | Up   | 2.28E-12 | 5.40E-12 | AAEL013312-PA (Fragment) OS=Aedes aegypti GN=AAEL013312 PE=4 SV=1                      |
| CCG003193.1 | 2004 | 58   | 427 | 1.24363503 | 7.448694701 | 2.582424468  | Up   | 0        | 0        | zinc finger protein 394 OS=Culex quinquefasciatus GN=CpipJ_CPIJ002919 PE=4 SV=1        |
| CCG009635.1 | 1819 | 92   | 427 | 2.17329059 | 8.206258484 | 1.916843507  | Up   | 1.44E-14 | 5.12E-14 | AAEL001561-PA OS=Aedes aegypti GN=AAEL001561 PE=4 SV=1                                 |
| CCG012584.1 | 256  | 0    | 428 | 0.001      | 58.44586898 | 15.83481344  | Up   | 4.44E-16 | 1.65E-15 | histone H2B OS=Ixodes scapularis GN=IscW_ISCW019496 PE=2 SV=1                          |
| CCG005390.1 | 1138 | 25   | 428 | 0.94397484 | 13.1477526  | 3.799924     | Up   | 9.32E-12 | 2.08E-11 | AAEL006407-PA OS=Aedes aegypti GN=AAEL006407 PE=4 SV=1                                 |
| CCG027125.1 | 1471 | 63   | 428 | 1.84030814 | 10.17140888 | 2.466500267  | Up   | 0        | 0        | Queuine tRNA-ribosyltransferase OS=Aedes aegypti GN=AAEL010993 PE=3 SV=1               |
| CCG006531.1 | 457  | 70   | 428 | 6.58179742 | 32.73991785 | 2.314497173  | Up   | 0        | 0        | AAEL003029-PA OS=Aedes aegypti GN=AAEL003029 PE=4 SV=1                                 |
| CCG010601.1 | 1167 | 76   | 428 | 2.79837175 | 12.82103038 | 2.195852677  | Up   | 0        | 0        | AAEL001811-PA OS=Aedes aegypti GN=AAEL001811 PE=4 SV=1                                 |
| CCG025979.1 | 884  | 111  | 428 | 5.39552097 | 16.92550052 | 1.649364324  | Up   | 0        | 0        | AAEL001997-PA OS=Aedes aegypti GN=AAEL001997 PE=4 SV=1                                 |
| CCG016459.1 | 1443 | 169  | 428 | 5.03249144 | 10.36877509 | 1.042900754  | Up   | 0        | 0        | AAEL004247-PA OS=Aedes aegypti GN=AAEL004247 PE=4 SV=1                                 |

|             |      |      |     |            |             |              |      |           |            |                                                                                          |
|-------------|------|------|-----|------------|-------------|--------------|------|-----------|------------|------------------------------------------------------------------------------------------|
| CCG013087.1 | 1170 | 18   | 429 | 0.66107284 | 12.81803482 | 4.27722204   | Up   | 1.62E-09  | 3.33E-09   | AAEL004318-PA OS=Aedes aegypti GN=AAEL004318 PE=4 SV=1                                   |
| CCG011005.1 | 1566 | 27   | 429 | 0.74085749 | 9.576692679 | 3.692259539  | Up   | 2.28E-12  | 5.42E-12   | AAEL010185-PA OS=Aedes aegypti GN=AAEL010185 PE=4 SV=1                                   |
| CCG023370.1 | 1120 | 51   | 429 | 1.95665756 | 13.39026851 | 2.774721699  | Up   | 0         | 0          | AAEL000697-PA OS=Aedes aegypti GN=AAEL006971 PE=4 SV=1                                   |
| CCG009833.1 | 3887 | 72   | 429 | 0.79594054 | 3.858271349 | 2.27722204   | Up   | 0         | 0          | Putative uncharacterized protein OS=Culex quinquefasciatus GN=CpipJ_CPIJ014679 PE=4 SV=1 |
| CCG013217.1 | 1203 | 144  | 429 | 5.14350938 | 12.4664179  | 1.27722204   | Up   | 7.53E-14  | 2.43E-13   | AAEL003750-PA OS=Aedes aegypti GN=AAEL003750 PE=4 SV=1                                   |
| CCG013426.1 | 729  | 2    | 430 | 0.11788679 | 20.62010838 | 7.450506053  | Up   | 9.36E-05  | 0.00015377 | AAEL014270-PA OS=Aedes aegypti GN=AAEL014276 PE=4 SV=1                                   |
| CCG016381.1 | 1290 | 16   | 430 | 0.53295795 | 11.65275892 | 4.450506053  | Up   | 7.09E-09  | 1.42E-08   | DNA primase OS=Aedes aegypti GN=AAEL014314 PE=3 SV=1                                     |
| CCG003700.1 | 1540 | 96   | 430 | 2.67863281 | 9.761077281 | 1.865543553  | Up   | 0         | 0          | AAEL005050-PA OS=Aedes aegypti GN=AAEL005050 PE=4 SV=1                                   |
| CCG017775.1 | 1430 | 111  | 430 | 3.33541297 | 10.51192938 | 1.656090187  | Up   | 0         | 0          | AAEL012913-PA OS=Aedes aegypti GN=AAEL012913 PE=4 SV=1                                   |
| CCG011041.1 | 3786 | 1948 | 430 | 22.1090975 | 3.970432914 | -2.477271909 | Down | 1.60E-303 | 1.01E-302  | Putative uncharacterized protein OS=Culex quinquefasciatus GN=CpipJ_CPIJ006592 PE=4 SV=1 |
| CCG025371.1 | 540  | 21   | 431 | 1.67104523 | 27.90188387 | 4.06153984   | Up   | 1.76E-10  | 3.73E-10   | AAEL006610-PA OS=Aedes aegypti GN=AAEL006610 PE=4 SV=1                                   |
| CCG016032.1 | 1347 | 23   | 431 | 0.73370742 | 11.18561046 | 3.930295307  | Up   | 4.01E-11  | 8.66E-11   | Uncharacterized protein OS=Anopheles darlingi GN=AND_17290 PE=4 SV=1                     |
| CCG009025.1 | 927  | 85   | 431 | 3.94005118 | 16.25352458 | 2.044466327  | Up   | 0         | 0          | AAEL012771-PA OS=Aedes aegypti GN=AAEL012771 PE=4 SV=1                                   |
| CCG019356.1 | 504  | 89   | 431 | 7.58790948 | 29.89487557 | 1.978123832  | Up   | 0         | 0          | AAEL013778-PA OS=Aedes aegypti GN=AAEL013778 PE=4 SV=1                                   |
| CCG013509.1 | 1686 | 99   | 431 | 2.52313388 | 8.936546435 | 1.824500643  | Up   | 0         | 0          | AAEL014321-PA OS=Aedes aegypti GN=AAEL014321 PE=4 SV=1                                   |

|             |      |      |     |            |             |              |      |           |           |                                                                                 |
|-------------|------|------|-----|------------|-------------|--------------|------|-----------|-----------|---------------------------------------------------------------------------------|
| CCG016987.1 | 306  | 128  | 431 | 17.9742681 | 49.23861859 | 1.453857263  | Up   | 4.15E-14  | 1.42E-13  | Putative uncharacterized protein<br>OS=Ochlerotatus taeniorhynchus<br>PE=4 SV=1 |
| CCG015999.1 | 2117 | 132  | 431 | 2.67926546 | 7.117155073 | 1.409463144  | Up   | 1.46E-13  | 4.35E-13  | AAEL012975-PA OS=Aedes<br>aegypti GN=AAEL012975 PE=4<br>SV=1                    |
| CCG024279.1 | 1631 | 167  | 431 | 4.39972145 | 9.237901465 | 1.07015297   | Up   | 1.62E-13  | 4.78E-13  | AAEL007343-PA OS=Aedes<br>aegypti GN=AAEL007343 PE=4<br>SV=1                    |
| CCG017769.1 | 1905 | 1407 | 431 | 31.7367016 | 7.909195427 | -2.00454935  | Down | 1.06E-168 | 6.17E-168 | AAEL006216-PA OS=Aedes<br>aegypti GN=AAEL006216 PE=4<br>SV=1                    |
| CCG019138.2 | 663  | 2422 | 431 | 156.972394 | 22.72551627 | -2.788125887 | Down | 0         | 0         | AAEL002309-PA OS=Aedes<br>aegypti GN=TPX4 PE=4 SV=1                             |
| CCG016602.1 | 3285 | 2630 | 431 | 34.4019489 | 4.586611047 | -2.906989821 | Down | 0         | 0         | AAEL008032-PA OS=Aedes<br>aegypti GN=AAEL008032 PE=4<br>SV=1                    |
| CCG007919.1 | 2084 | 49   | 432 | 1.01032485 | 7.24662935  | 2.842490862  | Up   | 0         | 0         | AAEL006858-PA OS=Aedes<br>aegypti GN=AAEL006858 PE=4<br>SV=1                    |
| CCG004873.1 | 1391 | 86   | 432 | 2.65664786 | 10.85691989 | 2.030935951  | Up   | 0         | 0         | AAEL007652-PA OS=Aedes<br>aegypti GN=AAEL007652 PE=4<br>SV=1                    |
| CCG021884.1 | 771  | 107  | 432 | 5.96337432 | 19.58751695 | 1.71573372   | Up   | 0         | 0         | AAEL012238-PA OS=Aedes<br>aegypti GN=AAEL012238 PE=2<br>SV=1                    |
| CCG020004.1 | 586  | 14   | 433 | 1.02658069 | 25.83094512 | 4.653181496  | Up   | 3.07E-08  | 6.01E-08  | -                                                                               |
| CCG026194.1 | 930  | 18   | 433 | 0.83167228 | 16.27627295 | 4.290611417  | Up   | 1.62E-09  | 3.33E-09  | -                                                                               |
| CCG005507.2 | 1518 | 75   | 433 | 2.1230106  | 9.971629672 | 2.231717728  | Up   | 0         | 0         | AAEL001395-PA OS=Aedes<br>aegypti GN=AAEL001395 PE=4<br>SV=1                    |
| CCG021645.1 | 1258 | 86   | 433 | 2.93751763 | 12.03253883 | 2.034271664  | Up   | 0         | 0         | -                                                                               |
| CCG010065.1 | 492  | 88   | 433 | 7.68564359 | 30.7661257  | 2.0011048    | Up   | 2.93E-14  | 1.02E-13  | AAEL006502-PA OS=Aedes<br>aegypti GN=AAEL006502 PE=4<br>SV=1                    |
| CCG001897.1 | 1182 | 107  | 433 | 3.88981523 | 12.8062046  | 1.719069432  | Up   | 0         | 0         | AAEL010388-PA OS=Aedes<br>aegypti GN=AAEL010388 PE=4<br>SV=1                    |
| CCG025038.1 | 1583 | 111  | 433 | 3.01303888 | 9.562181833 | 1.666120552  | Up   | 0         | 0         | AAEL005395-PA OS=Aedes<br>aegypti GN=AAEL005395 PE=4<br>SV=1                    |
| CCG004514.1 | 1582 | 761  | 433 | 20.6700177 | 9.568226196 | -1.111216225 | Down | 3.35E-39  | 1.49E-38  | AGAP007599-PA OS=Anopheles<br>gambiae GN=AGAP007599 PE=4<br>SV=4                |

|             |      |      |     |            |             |              |      |           |           |                                                                         |
|-------------|------|------|-----|------------|-------------|--------------|------|-----------|-----------|-------------------------------------------------------------------------|
| CCG003186.1 | 360  | 1417 | 433 | 169.13365  | 42.04703845 | -2.008087624 | Down | 2.80E-170 | 1.62E-169 | AAEL005667-PA (Fragment)<br>OS=Aedes aegypti<br>GN=AAEL005667 PE=4 SV=1 |
| CCG014520.1 | 1077 | 23   | 434 | 0.91764521 | 14.08717931 | 3.94030248   | Up   | 4.01E-11  | 8.67E-11  | AAEL007581-PA OS=Aedes<br>aegypti GN=AAEL007581 PE=4<br>SV=1            |
| CCG005560.1 | 2110 | 32   | 434 | 0.6516737  | 7.190470199 | 3.463864436  | Up   | 1.77E-13  | 5.17E-13  | AAEL003549-PA OS=Aedes<br>aegypti GN=AAEL003549 PE=4<br>SV=1            |
| CCG023979.1 | 1389 | 44   | 434 | 1.3611723  | 10.92288849 | 3.004432818  | Up   | 3.91E-14  | 1.34E-13  | AAEL000289-PA OS=Aedes<br>aegypti GN=AAEL000289 PE=4<br>SV=1            |
| CCG015551.1 | 3743 | 78   | 434 | 0.89544197 | 4.053404253 | 2.178462217  | Up   | 0         | 0         | AAEL003036-PA OS=Aedes<br>aegypti GN=AAEL003036 PE=4<br>SV=1            |
| CCG005556.1 | 636  | 93   | 434 | 6.28331025 | 23.85517629 | 1.924705625  | Up   | 4.04E-14  | 1.39E-13  | -                                                                       |
| CCG007129.4 | 1686 | 128  | 434 | 3.26223371 | 8.998749774 | 1.463864436  | Up   | 4.15E-14  | 1.42E-13  | AAEL005820-PA OS=Aedes<br>aegypti GN=AAEL005820 PE=4<br>SV=1            |
| CCG014872.1 | 2187 | 175  | 434 | 3.43836468 | 6.937307782 | 1.012653324  | Up   | 3.55E-13  | 9.58E-13  | AAEL008533-PA OS=Aedes<br>aegypti GN=AAEL008533 PE=4<br>SV=1            |
| CCG009863.1 | 1725 | 37   | 435 | 0.92166967 | 8.815565447 | 3.257731429  | Up   | 5.17E-14  | 1.74E-13  | AAEL012465-PA OS=Aedes<br>aegypti GN=AAEL012465 PE=4<br>SV=1            |
| CCG006096.1 | 3450 | 1010 | 435 | 12.5795455 | 4.407782723 | -1.512954783 | Down | 2.95E-82  | 1.51E-81  | AAEL004690-PA OS=Aedes<br>aegypti GN=AAEL004690 PE=4<br>SV=1            |
| CCG020898.1 | 1158 | 26   | 436 | 0.96477815 | 13.16218366 | 3.77005781   | Up   | 4.60E-12  | 1.05E-11  | AAEL013531-PA OS=Aedes<br>aegypti GN=AAEL013531 PE=3<br>SV=1            |
| CCG017303.1 | 942  | 98   | 436 | 4.47031209 | 16.18026398 | 1.855787684  | Up   | 0         | 0         | AAEL002362-PA OS=Aedes<br>aegypti GN=AAEL002362 PE=4<br>SV=1            |
| CCG022027.1 | 1330 | 113  | 436 | 3.65081204 | 11.46000652 | 1.650318566  | Up   | 1.42E-13  | 4.27E-13  | AAEL014961-PA OS=Aedes<br>aegypti GN=AAEL014961 PE=4<br>SV=1            |
| CCG003576.1 | 1611 | 122  | 436 | 3.25407053 | 9.461085458 | 1.539760191  | Up   | 8.04E-14  | 2.58E-13  | -                                                                       |
| CCG011407.1 | 1329 | 135  | 436 | 4.36487146 | 11.46862955 | 1.393681932  | Up   | 1.90E-13  | 5.49E-13  | AAEL009635-PA OS=Aedes<br>aegypti GN=AAEL009635 PE=4<br>SV=1            |
| CCG015962.1 | 1083 | 161  | 436 | 6.38792915 | 14.07369222 | 1.13958065   | Up   | 0         | 0         | Conserved membrane protein<br>OS=Aedes aegypti PE=2 SV=1                |
| CCG023643.1 | 1411 | 3240 | 436 | 98.6689866 | 10.8021323  | -3.191280569 | Down | 0         | 0         | AAEL003611-PA OS=Aedes<br>aegypti GN=AAEL003611 PE=3<br>SV=1            |
| CCG010646.1 | 477  | 7    | 437 | 0.63058311 | 32.02676509 | 5.666447751  | Up   | 4.31E-06  | 7.69E-06  | Histone H2A OS=Gasterosteus<br>aculeatus PE=3 SV=1                      |

|             |      |      |     |            |             |              |      |          |          |                                                                                          |
|-------------|------|------|-----|------------|-------------|--------------|------|----------|----------|------------------------------------------------------------------------------------------|
| CCG001168.1 | 1296 | 81   | 437 | 2.68560841 | 11.78762882 | 2.13395267   | Up   | 4.46E-14 | 1.51E-13 | AAEL007926-PA OS=Aedes aegypti GN=AAEL007926 PE=4 SV=1                                   |
| CCG005773.1 | 1390 | 104  | 437 | 3.21500173 | 10.99047982 | 1.773362955  | Up   | 0        | 0        | AAEL014705-PA OS=Aedes aegypti GN=AAEL014705 PE=4 SV=1                                   |
| CCG010154.1 | 967  | 129  | 437 | 5.73226036 | 15.79810439 | 1.462575418  | Up   | 0        | 0        | -                                                                                        |
| CCG012396.1 | 1986 | 174  | 437 | 3.76471995 | 7.692229078 | 1.030859177  | Up   | 1.78E-13 | 5.20E-13 | AAEL011277-PA (Fragment) OS=Aedes aegypti GN=AAEL011277 PE=4 SV=1                        |
| CCG016523.1 | 920  | 1058 | 437 | 49.4151948 | 16.60518147 | -1.573321239 | Down | 4.11E-91 | 2.14E-90 | AAEL003482-PA OS=Aedes aegypti GN=AAEL003482 PE=4 SV=1                                   |
| CCG017921.1 | 2217 | 34   | 438 | 0.65898556 | 6.906506642 | 3.389637422  | Up   | 8.82E-14 | 2.80E-13 | Putative uncharacterized protein OS=Culex quinquefasciatus GN=CpipJ_CPIJ014312 PE=4 SV=1 |
| CCG024612.1 | 1509 | 79   | 438 | 2.24957524 | 10.14693521 | 2.173319515  | Up   | 0        | 0        | AAEL005468-PA OS=Aedes aegypti GN=AAEL005468 PE=4 SV=1                                   |
| CCG019052.2 | 1428 | 719  | 438 | 21.6353216 | 10.72249666 | -1.012747697 | Down | 4.06E-32 | 1.73E-31 | AAEL000851-PA OS=Aedes aegypti GN=AAEL000851 PE=4 SV=1                                   |
| CCG012053.1 | 2415 | 963  | 438 | 17.1345153 | 6.340258893 | -1.434291724 | Down | 1.38E-72 | 6.88E-72 | AAEL004122-PA OS=Aedes aegypti GN=AAEL004122 PE=4 SV=1                                   |
| CCG020675.1 | 1229 | 18   | 439 | 0.62933704 | 12.4871306  | 4.310465332  | Up   | 1.62E-09 | 3.32E-09 | AAEL006787-PA OS=Aedes aegypti GN=AAEL006787 PE=4 SV=1                                   |
| CCG027987.1 | 2469 | 29   | 439 | 0.50470729 | 6.215748685 | 3.622409338  | Up   | 6.66E-13 | 1.69E-12 | AAEL001591-PA OS=Aedes aegypti GN=AAEL001591 PE=4 SV=1                                   |
| CCG006225.1 | 1061 | 108  | 439 | 4.37392209 | 14.46435768 | 1.725502831  | Up   | 0        | 0        | AAEL011782-PA OS=Aedes aegypti GN=AAEL011782 PE=4 SV=1                                   |
| CCG017961.1 | 1605 | 131  | 439 | 3.50718706 | 9.561796575 | 1.446967332  | Up   | 1.26E-13 | 3.87E-13 | AAEL009701-PA (Fragment) OS=Aedes aegypti GN=AAEL009701 PE=4 SV=1                        |
| CCG000596.1 | 3465 | 1103 | 439 | 13.6783888 | 4.429057288 | -1.626826742 | Down | 1.40E-99 | 7.41E-99 | Uncharacterized protein OS=Anopheles darlingi GN=AND_13904 PE=4 SV=1                     |
| CCG021776.1 | 2286 | 3375 | 439 | 63.4395688 | 6.713334866 | -3.240281453 | Down | 0        | 0        | AAEL000153-PA OS=Aedes aegypti GN=AAEL000153 PE=4 SV=1                                   |
| CCG023003.1 | 682  | 0    | 440 | 0.001      | 22.55372695 | 14.46107823  | Up   | 4.44E-16 | 1.64E-15 | AAEL008137-PA OS=Aedes aegypti GN=AAEL008137 PE=4 SV=1                                   |



|             |       |      |     |            |             |              |      |           |           |                                                                                              |
|-------------|-------|------|-----|------------|-------------|--------------|------|-----------|-----------|----------------------------------------------------------------------------------------------|
| CCG010136.1 | 1324  | 6    | 440 | 0.19472689 | 11.61755421 | 5.898710417  | Up   | 8.38E-06  | 1.48E-05  | Histone H2A OS=Gasterosteus aculeatus PE=3 SV=1                                              |
| CCG009776.1 | 2265  | 1554 | 440 | 29.4812219 | 6.791011823 | -2.118097871 | Down | 5.71E-200 | 3.41E-199 | Alpha-amylase T OS=Culex quinquefasciatus GN=CpipJ_CPIJ017521 PE=3 SV=1                      |
| CCG020688.1 | 1572  | 6    | 441 | 0.16400662 | 9.806997491 | 5.901985549  | Up   | 8.38E-06  | 1.48E-05  | Putative uncharacterized protein OS=Culex quinquefasciatus GN=CpipJ_CPIJ001997 PE=4 SV=1     |
| CCG003839.2 | 720   | 17   | 441 | 1.01456318 | 21.41194452 | 4.399485208  | Up   | 3.39E-09  | 6.89E-09  | AAEL001684-PA OS=Aedes aegypti GN=AAEL001684 PE=4 SV=1                                       |
| CCG015950.3 | 1593  | 53   | 441 | 1.42962708 | 9.677715039 | 2.759027595  | Up   | 0         | 0         | AAEL005688-PA OS=Aedes aegypti GN=AAEL005688 PE=3 SV=1                                       |
| CCG002811.1 | 477   | 60   | 441 | 5.40499806 | 32.31991626 | 2.580057454  | Up   | 0         | 0         | AAEL006006-PA OS=Aedes aegypti GN=AAEL006006 PE=4 SV=1                                       |
| CCG023966.1 | 243   | 97   | 441 | 17.1525278 | 63.44279859 | 1.887035207  | Up   | 3.62E-14  | 1.25E-13  | AAEL008842-PA OS=Aedes aegypti GN=AAEL008842 PE=4 SV=1                                       |
| CCG027956.1 | 445   | 106  | 441 | 10.2354873 | 34.64404507 | 1.759027595  | Up   | 0         | 0         | -                                                                                            |
| CCG008608.1 | 984   | 162  | 441 | 7.07428558 | 15.66727648 | 1.147098046  | Up   | 0         | 0         | AAEL010316-PA OS=Aedes aegypti GN=AAEL010316 PE=4 SV=1                                       |
| CCG007729.1 | 999   | 998  | 441 | 42.9267219 | 15.43203209 | -1.475947956 | Down | 2.10E-78  | 1.06E-77  | AAEL008343-PA OS=Aedes aegypti GN=CYP4G35 PE=3 SV=1                                          |
| CCG005307.1 | 1669  | 1347 | 441 | 34.6795881 | 9.237028194 | -1.908586086 | Down | 2.32E-151 | 1.32E-150 | Substrate carrier family 25 member 2 OS=Culex quinquefasciatus GN=CpipJ_CPIJ004614 PE=4 SV=1 |
| CCG016869.1 | 16943 | 1560 | 441 | 3.95637054 | 0.909909701 | -2.120382264 | Down | 5.18E-201 | 3.09E-200 | AAEL005337-PA OS=Aedes aegypti GN=AAEL005337 PE=4 SV=1                                       |
| CCG025069.2 | 1005  | 9001 | 441 | 384.846349 | 15.33990055 | -4.648921527 | Down | 0         | 0         | AAEL006576-PA OS=Aedes aegypti GN=AAEL006576 PE=3 SV=1                                       |
| CCG000536.1 | 1263  | 59   | 442 | 2.0072956  | 12.23401293 | 2.607572714  | Up   | 0         | 0         | AAEL013901-PA OS=Aedes aegypti GN=AAEL013901 PE=4 SV=1                                       |
| CCG002720.1 | 3130  | 61   | 442 | 0.83742933 | 4.936600107 | 2.559478426  | Up   | 1.75E-14  | 6.17E-14  | Zinc finger protein 337 OS=Culex quinquefasciatus GN=CpipJ_CPIJ014708 PE=4 SV=1              |
| CCG028198.1 | 999   | 108  | 442 | 4.64537671 | 15.46702536 | 1.735328261  | Up   | 0         | 0         | Protein kinase C OS=Aedes aegypti GN=AAEL001108 PE=3 SV=1                                    |

|             |       |      |     |            |             |              |      |           |           |                                                                                    |
|-------------|-------|------|-----|------------|-------------|--------------|------|-----------|-----------|------------------------------------------------------------------------------------|
| CCG014716.1 | 2155  | 115  | 442 | 2.29304848 | 7.170096674 | 1.644725712  | Up   | 6.13E-14  | 2.03E-13  | AAEL001984-PA OS=Aedes aegypti GN=AAEL001984 PE=4 SV=1                             |
| CCG015677.1 | 2567  | 131  | 442 | 2.19284583 | 6.019305934 | 1.456792762  | Up   | 1.26E-13  | 3.87E-13  | AAEL001470-PA OS=Aedes aegypti GN=AAEL001470 PE=4 SV=1                             |
| CCG013256.1 | 18873 | 1068 | 442 | 2.43160476 | 0.818712358 | -1.570480168 | Down | 1.02E-91  | 5.34E-91  | Uncharacterized protein OS=Anopheles darlingi GN=AND_14085 PE=4 SV=1               |
| CCG007046.2 | 1056  | 1865 | 442 | 75.8887832 | 14.63215751 | -2.374744152 | Down | 2.30E-276 | 1.43E-275 | Galactose-1-phosphate uridylyltransferase OS=Aedes aegypti GN=AAEL001607 PE=3 SV=1 |
| CCG017640.1 | 1389  | 40   | 443 | 1.23742936 | 11.14940001 | 3.171547997  | Up   | 6.86E-14  | 2.25E-13  | AAEL000289-PA OS=Aedes aegypti GN=AAEL000289 PE=4 SV=1                             |
| CCG014888.1 | 903   | 114  | 443 | 5.42475055 | 17.15007377 | 1.660586078  | Up   | 8.48E-14  | 2.70E-13  | AAEL013177-PA OS=Aedes aegypti GN=AAEL013177 PE=4 SV=1                             |
| CCG015668.1 | 1199  | 127  | 443 | 4.5514231  | 12.916194   | 1.504791406  | Up   | 1.57E-13  | 4.67E-13  | AAEL007196-PA OS=Aedes aegypti GN=AAEL007196 PE=2 SV=1                             |
| CCG005749.1 | 873   | 163  | 443 | 8.02298596 | 17.73942338 | 1.144747938  | Up   | 1.80E-13  | 5.24E-13  | AAEL009703-PA OS=Aedes aegypti GN=AAEL009703 PE=4 SV=1                             |
| CCG008830.1 | 1476  | 1813 | 443 | 52.7805751 | 10.49221993 | -2.330687117 | Down | 1.14E-262 | 7.05E-262 | AAEL004440-PA OS=Aedes aegypti GN=AAEL004440 PE=4 SV=1                             |
| CCG006760.1 | 1870  | 2534 | 443 | 58.2274372 | 8.281559685 | -2.813724717 | Down | 0         | 0         | AAEL012200-PA OS=Aedes aegypti GN=CYP4C38 PE=3 SV=1                                |
| CCG007968.1 | 1476  | 21   | 444 | 0.61135801 | 10.51590439 | 4.104411647  | Up   | 1.76E-10  | 3.72E-10  | AAEL002186-PA OS=Aedes aegypti GN=AAEL002186 PE=4 SV=1                             |
| CCG005748.1 | 601   | 72   | 444 | 5.14778851 | 25.82608134 | 2.326804069  | Up   | 0         | 0         | Glyoxylase OS=Aedes aegypti PE=2 SV=1                                              |
| CCG006951.1 | 1113  | 94   | 444 | 3.62907013 | 13.94561984 | 1.942140218  | Up   | 0         | 0         | AAEL003087-PA OS=Aedes aegypti GN=AAEL003087 PE=4 SV=1                             |
| CCG019628.1 | 1882  | 146  | 444 | 3.33346507 | 8.247329908 | 1.306904511  | Up   | 9.33E-15  | 3.33E-14  | AAEL004910-PA OS=Aedes aegypti GN=AAEL004910 PE=4 SV=1                             |
| CCG019383.1 | 681   | 148  | 444 | 9.33850326 | 22.79218045 | 1.287275705  | Up   | 0         | 0         | AAEL013890-PA OS=Aedes aegypti GN=AAEL013890 PE=4 SV=1                             |
| CCG022550.1 | 670   | 6    | 445 | 0.38480359 | 23.21855696 | 5.915012229  | Up   | 8.38E-06  | 1.48E-05  | -                                                                                  |

|             |      |      |     |            |             |              |      |           |           |                                                                                          |
|-------------|------|------|-----|------------|-------------|--------------|------|-----------|-----------|------------------------------------------------------------------------------------------|
| CCG005710.1 | 1632 | 20   | 445 | 0.52658988 | 9.532128164 | 4.178046635  | Up   | 3.69E-10  | 7.72E-10  | AAEL002838-PA OS=Aedes aegypti GN=AAEL002838 PE=4 SV=1                                   |
| CCG002744.1 | 299  | 32   | 445 | 4.59876758 | 52.02820456 | 3.49997473   | Up   | 1.77E-13  | 5.17E-13  | AAEL001029-PA OS=Aedes aegypti GN=AAEL001029 PE=4 SV=1                                   |
| CCG003099.1 | 1215 | 66   | 445 | 2.33415842 | 12.80364869 | 2.45558061   | Up   | 0         | 0         | AAEL002170-PA OS=Aedes aegypti GN=AAEL002170 PE=4 SV=1                                   |
| CCG016399.1 | 1164 | 145  | 445 | 5.35275904 | 13.3646333  | 1.32006564   | Up   | 0         | 0         | AAEL007668-PA OS=Aedes aegypti GN=AAEL007668 PE=4 SV=1                                   |
| CCG018917.1 | 2367 | 149  | 445 | 2.70489669 | 6.572215109 | 1.280806209  | Up   | 2.33E-13  | 6.62E-13  | AAEL000922-PA OS=Aedes aegypti GN=AAEL000922 PE=4 SV=1                                   |
| CCG004116.1 | 1602 | 174  | 445 | 4.66712473 | 9.710632437 | 1.057031234  | Up   | 1.78E-13  | 5.20E-13  | AAEL008643-PA OS=Aedes aegypti GN=AAEL008643 PE=4 SV=1                                   |
| CCG008231.1 | 2244 | 1545 | 445 | 29.5847772 | 6.932456847 | -2.093416393 | Down | 7.67E-196 | 4.57E-195 | AAEL003154-PA OS=Aedes aegypti GN=AAEL003154 PE=4 SV=1                                   |
| CCG028600.1 | 873  | 49   | 446 | 2.41181786 | 17.85955491 | 2.88850326   | Up   | 0         | 0         | Ring finger protein 121 OS=Culex quinquefasciatus GN=CpipJ_CPIJ006831 PE=4 SV=1          |
| CCG020582.1 | 539  | 120  | 446 | 9.56654574 | 28.92651473 | 1.596322508  | Up   | 0         | 0         | AAEL000561-PA OS=Aedes aegypti GN=AAEL000561 PE=4 SV=1                                   |
| CCG010805.1 | 2414 | 129  | 446 | 2.29622857 | 6.458737134 | 1.491985848  | Up   | 0         | 0         | AAEL013552-PA OS=Aedes aegypti GN=AAEL013552 PE=4 SV=1                                   |
| CCG027314.1 | 1929 | 862  | 446 | 19.2016129 | 8.082629052 | -1.248330955 | Down | 6.98E-53  | 3.30E-52  | Putative uncharacterized protein OS=Culex quinquefasciatus GN=CpipJ_CPIJ008752 PE=4 SV=1 |
| CCG014539.1 | 4616 | 3050 | 446 | 28.3920473 | 3.377684454 | -3.071380424 | Down | 0         | 0         | AAEL009795-PA OS=Aedes aegypti GN=AAEL009795 PE=4 SV=1                                   |
| CCG004222.1 | 489  | 20   | 447 | 1.75745336 | 31.95572539 | 4.18451613   | Up   | 3.69E-10  | 7.72E-10  | AAEL005232-PA OS=Aedes aegypti GN=AAEL005232 PE=4 SV=1                                   |
| CCG004899.1 | 1278 | 30   | 447 | 1.00867922 | 12.2271907  | 3.599553629  | Up   | 3.71E-13  | 9.95E-13  | Putative uncharacterized protein OS=Culex quinquefasciatus GN=CpipJ_CPIJ001997 PE=4 SV=1 |
| CCG017874.1 | 2004 | 55   | 447 | 1.17930908 | 7.797579699 | 2.725084511  | Up   | 0         | 0         | AAEL010355-PA OS=Aedes aegypti GN=AAEL010355 PE=4 SV=1                                   |

|             |      |      |     |            |             |              |      |           |           |                                                                                       |
|-------------|------|------|-----|------------|-------------|--------------|------|-----------|-----------|---------------------------------------------------------------------------------------|
| CCG012166.1 | 1033 | 110  | 447 | 4.57567358 | 15.12715365 | 1.725084511  | Up   | 0         | 0         | Peptidyl-prolyl cis-trans isomerase<br>OS=Aedes aegypti<br>GN=AAEL003477 PE=3 SV=1    |
| CCG015934.1 | 1223 | 118  | 447 | 4.14589426 | 12.77706436 | 1.623801176  | Up   | 0         | 0         | AAEL003084-PA (Fragment)<br>OS=Aedes aegypti<br>GN=AAEL801117_b PE=2 SV=1             |
| CCG017246.1 | 2304 | 172  | 447 | 3.20781005 | 6.782269843 | 1.08017947   | Up   | 1.35E-13  | 4.09E-13  | AAEL010800-PA OS=Aedes<br>aegypti GN=AAEL010800 PE=4<br>SV=1                          |
| CCG003662.1 | 2547 | 886  | 447 | 14.9474617 | 6.135198161 | -1.284718664 | Down | 9.75E-57  | 4.66E-56  | AAEL006390-PA OS=Aedes<br>aegypti GN=AAEL006390 PE=2<br>SV=1                          |
| CCG002345.1 | 1914 | 1281 | 447 | 28.7587409 | 8.164237052 | -1.816610535 | Down | 1.12E-134 | 6.27E-134 | Putative carboxylesterase<br>OS=Aedes aegypti PE=2 SV=1                               |
| CCG028623.1 | 1449 | 1427 | 447 | 42.3173301 | 10.78423031 | -1.972325394 | Down | 1.95E-167 | 1.13E-166 | AAEL011981-PA OS=Aedes<br>aegypti GN=AAEL011981 PE=3<br>SV=1                          |
| CCG002946.1 | 1032 | 30   | 448 | 1.24912019 | 15.17568604 | 3.60277753   | Up   | 3.71E-13  | 9.96E-13  | Cytosine-specific<br>methyltransferase OS=Aedes<br>aegypti GN=AAEL006166 PE=3<br>SV=1 |
| CCG011211.1 | 786  | 0    | 449 | 0.001      | 19.96980442 | 14.28553258  | Up   | 4.44E-16  | 1.65E-15  | AAEL013288-PA OS=Aedes<br>aegypti GN=AAEL013288 PE=4<br>SV=1                          |
| CCG018502.1 | 990  | 0    | 449 | 0.001      | 15.85481441 | 13.95263337  | Up   | 4.44E-16  | 1.63E-15  | AAEL005916-PA OS=Aedes<br>aegypti GN=AAEL005916 PE=4<br>SV=1                          |
| CCG002828.1 | 2139 | 6    | 449 | 0.12053221 | 7.338132899 | 5.927922338  | Up   | 8.38E-06  | 1.47E-05  | AAEL002320-PA OS=Aedes<br>aegypti GN=AAEL002320 PE=4<br>SV=1                          |
| CCG007399.1 | 1437 | 35   | 449 | 1.04658365 | 10.92294104 | 3.383601822  | Up   | 6.39E-14  | 2.11E-13  | Wd repeat protein OS=Culex<br>quinquefasciatus<br>GN=CpipJ_CPIJ009423 PE=4<br>SV=1    |
| CCG015899.1 | 1642 | 121  | 449 | 3.16646644 | 9.559236462 | 1.594021601  | Up   | 0         | 0         | AAEL006694-PA OS=Aedes<br>aegypti GN=AAEL006694 PE=4<br>SV=1                          |
| CCG007924.1 | 1275 | 132  | 449 | 4.44863135 | 12.31079708 | 1.468490719  | Up   | 1.46E-13  | 4.36E-13  | AAEL006870-PA OS=Aedes<br>aegypti GN=AAEL006870 PE=4<br>SV=1                          |
| CCG013860.1 | 1722 | 139  | 449 | 3.46852097 | 9.115137207 | 1.393943766  | Up   | 1.46E-13  | 4.37E-13  | -                                                                                     |
| CCG023090.1 | 707  | 1082 | 449 | 65.7613194 | 22.20122528 | -1.566599945 | Down | 1.46E-92  | 7.62E-92  | AAEL001325-PA OS=Aedes<br>aegypti GN=AAEL001325 PE=4<br>SV=1                          |
| CCG013241.1 | 1266 | 19   | 450 | 0.64488543 | 12.42592776 | 4.268166882  | Up   | 7.73E-10  | 1.60E-09  | AAEL012371-PA OS=Aedes<br>aegypti GN=AAEL012371 PE=4<br>SV=1                          |

|             |      |       |     |            |             |              |      |           |           |                                                                                          |
|-------------|------|-------|-----|------------|-------------|--------------|------|-----------|-----------|------------------------------------------------------------------------------------------|
| CCG020735.1 | 2087 | 32    | 450 | 0.65885554 | 7.537721393 | 3.516094395  | Up   | 1.77E-13  | 5.16E-13  | AAEL008101-PA OS=Aedes aegypti GN=AAEL008101 PE=4 SV=1                                   |
| CCG002710.1 | 1188 | 68    | 450 | 2.4595471  | 13.2417715  | 2.428631554  | Up   | 0         | 0         | AAEL007581-PA OS=Aedes aegypti GN=AAEL007581 PE=4 SV=1                                   |
| CCG000414.1 | 1768 | 73    | 450 | 1.77420284 | 8.897751441 | 2.326269836  | Up   | 0         | 0         | AAEL003913-PA OS=Aedes aegypti GN=AAEL003913 PE=4 SV=1                                   |
| CCG010180.1 | 1800 | 82    | 450 | 1.95751013 | 8.739569193 | 2.15854239   | Up   | 0         | 0         | AAEL006453-PA OS=Aedes aegypti GN=AAEL006453 PE=4 SV=1                                   |
| CCG013109.1 | 1539 | 119   | 450 | 3.32254608 | 10.22171835 | 1.621276632  | Up   | 0         | 0         | AAEL012306-PA OS=Aedes aegypti GN=AAEL012306 PE=4 SV=1                                   |
| CCG013347.1 | 1347 | 124   | 450 | 3.95564001 | 11.67871162 | 1.561898085  | Up   | 1.61E-13  | 4.77E-13  | AAEL008419-PA OS=Aedes aegypti GN=AAEL008419 PE=4 SV=1                                   |
| CCG018377.1 | 1374 | 130   | 450 | 4.06554985 | 11.44921728 | 1.493726582  | Up   | 0         | 0         | AAEL001533-PA OS=Aedes aegypti GN=AAEL001533 PE=3 SV=1                                   |
| CCG011446.1 | 1458 | 148   | 450 | 4.3618112  | 10.7895916  | 1.306641029  | Up   | 0         | 0         | AAEL014348-PB OS=Aedes aegypti GN=CASPS8 PE=4 SV=1                                       |
| CCG008101.1 | 930  | 1225  | 450 | 56.5999192 | 16.91529521 | -1.742471639 | Down | 1.21E-121 | 6.62E-121 | AAEL000757-PB OS=Aedes aegypti GN=AAEL000757 PE=4 SV=1                                   |
| CCG014618.1 | 642  | 13258 | 450 | 887.371871 | 24.50346503 | -5.178481142 | Down | 0         | 0         | AAEL004212-PA OS=Aedes aegypti GN=AAEL004212 PE=4 SV=1                                   |
| CCG024435.1 | 2661 | 35    | 451 | 0.56517877 | 5.924908991 | 3.39001381   | Up   | 6.39E-14  | 2.11E-13  | AAEL013016-PA OS=Aedes aegypti GN=AAEL013016 PE=4 SV=1                                   |
| CCG010762.1 | 717  | 64    | 451 | 3.83551327 | 21.98909738 | 2.519296827  | Up   | 0         | 0         | AAEL005132-PA OS=Aedes aegypti GN=AAEL005132 PE=4 SV=1                                   |
| CCG011128.1 | 1806 | 116   | 451 | 2.75996081 | 8.729890822 | 1.661315832  | Up   | 1.16E-13  | 3.59E-13  | Mitochondrial GTPase 1 OS=Culex quinquefasciatus GN=CpipJ_CPIJ017444 PE=3 SV=1           |
| CCG020694.1 | 312  | 141   | 451 | 19.4190147 | 50.53263726 | 1.379745475  | Up   | 0         | 0         | -                                                                                        |
| CCG005579.1 | 3306 | 991   | 451 | 12.8805224 | 4.768960322 | -1.43344442  | Down | 1.41E-74  | 7.05E-74  | Putative uncharacterized protein OS=Culex quinquefasciatus GN=CpipJ_CPIJ006609 PE=4 SV=1 |
| CCG019361.1 | 2114 | 1142  | 451 | 23.2126002 | 7.457986199 | -1.638050108 | Down | 4.73E-104 | 2.52E-103 | -                                                                                        |
| CCG005412.1 | 610  | 3455  | 451 | 243.377759 | 25.84620135 | -3.235173168 | Down | 0         | 0         | AAEL002797-PA OS=Aedes aegypti GN=AAEL002797 PE=4 SV=1                                   |

|             |       |      |     |            |             |              |      |           |           |                                                                                          |
|-------------|-------|------|-----|------------|-------------|--------------|------|-----------|-----------|------------------------------------------------------------------------------------------|
| CCG000767.1 | 2088  | 20   | 452 | 0.4115875  | 7.567596313 | 4.200564071  | Up   | 3.69E-10  | 7.71E-10  | AAEL001681-PA OS=Aedes aegypti GN=AAEL001681 PE=4 SV=1                                   |
| CCG001928.1 | 1692  | 68   | 452 | 1.72691605 | 9.338735875 | 2.435029325  | Up   | 0         | 0         | AAEL004456-PA OS=Aedes aegypti GN=AAEL004456 PE=4 SV=1                                   |
| CCG018691.1 | 900   | 142  | 452 | 6.77966924 | 17.55682345 | 1.372745047  | Up   | 2.62E-13  | 7.35E-13  | -                                                                                        |
| CCG022690.1 | 9075  | 1296 | 452 | 6.13650425 | 1.741172573 | -1.817357837 | Down | 2.63E-136 | 1.47E-135 | AGAP003681-PA OS=Anopheles gambiae GN=AgaP_AGAP003681 PE=4 SV=2                          |
| CCG026843.1 | 1344  | 6211 | 452 | 198.575165 | 11.75680141 | -4.078117686 | Down | 0         | 0         | AAEL003674-PA OS=Aedes aegypti GN=AAEL003674 PE=4 SV=1                                   |
| CCG027133.1 | 1665  | 17   | 453 | 0.43873002 | 9.511170798 | 4.438217603  | Up   | 3.39E-09  | 6.88E-09  | AAEL000404-PA OS=Aedes aegypti GN=AAEL000404 PE=4 SV=1                                   |
| CCG002307.1 | 829   | 26   | 453 | 1.34766357 | 19.10265305 | 3.825240726  | Up   | 4.60E-12  | 1.05E-11  | Ribulose-phosphate 3-epimerase OS=Aedes aegypti PE=2 SV=1                                |
| CCG002208.2 | 1038  | 36   | 453 | 1.49027981 | 15.25635778 | 3.355755442  | Up   | 6.13E-14  | 2.03E-13  | AAEL008443-PA OS=Aedes aegypti GN=AAEL008443 PE=4 SV=1                                   |
| CCG008717.1 | 942   | 80   | 453 | 3.64923436 | 16.81114584 | 2.203752349  | Up   | 0         | 0         | AAEL006646-PA OS=Aedes aegypti GN=AAEL006646 PE=4 SV=1                                   |
| CCG007850.1 | 1218  | 137  | 453 | 4.83321317 | 13.00172363 | 1.427648361  | Up   | 2.90E-13  | 8.04E-13  | AAEL014441-PA OS=Aedes aegypti GN=AAEL014441 PE=4 SV=1                                   |
| CCG002730.1 | 465   | 1917 | 453 | 177.146196 | 34.05612769 | -2.378954178 | Down | 1.27E-284 | 7.96E-284 | Putative uncharacterized protein OS=Culex quinquefasciatus GN=CpipJ_CPIJ015665 PE=4 SV=1 |
| CCG021004.1 | 2586  | 2335 | 453 | 38.799045  | 6.123781662 | -2.663526391 | Down | 0         | 0         | AAEL014344-PA OS=Aedes aegypti GN=AAEL014344 PE=4 SV=1                                   |
| CCG009874.1 | 1614  | 15   | 454 | 0.39934698 | 9.833369055 | 4.621971096  | Up   | 1.48E-08  | 2.93E-08  | AAEL007875-PA OS=Aedes aegypti GN=AAEL007875 PE=4 SV=1                                   |
| CCG002020.1 | 1414  | 71   | 454 | 2.15760336 | 11.22422748 | 2.379114572  | Up   | 0         | 0         | AAEL010811-PA OS=Aedes aegypti GN=AAEL010811 PE=4 SV=1                                   |
| CCG017619.1 | 955   | 107  | 454 | 4.81441006 | 16.61890854 | 1.787394705  | Up   | 0         | 0         | AAEL014899-PA OS=Aedes aegypti GN=AAEL014899 PE=3 SV=1                                   |
| CCG010624.1 | 1696  | 115  | 454 | 2.91363177 | 9.357934938 | 1.68337164   | Up   | 6.13E-14  | 2.03E-13  | AAEL001971-PA OS=Aedes aegypti GN=AAEL001971 PE=4 SV=1                                   |
| CCG012199.1 | 12315 | 924  | 454 | 3.22403855 | 1.288758234 | -1.32288735  | Down | 8.90E-62  | 4.32E-61  | AAEL005903-PA OS=Aedes aegypti GN=AAEL005903 PE=4 SV=1                                   |

|             |      |      |     |            |             |              |      |           |           |                                                                                                            |
|-------------|------|------|-----|------------|-------------|--------------|------|-----------|-----------|------------------------------------------------------------------------------------------------------------|
| CCG000368.1 | 930  | 26   | 455 | 1.20130441 | 17.10324294 | 3.831596221  | Up   | 4.60E-12  | 1.05E-11  | AAEL003654-PA OS=Aedes aegypti GN=AAEL003654 PE=4 SV=1                                                     |
| CCG000487.1 | 1599 | 27   | 455 | 0.72556775 | 9.94747713  | 3.777148437  | Up   | 2.28E-12  | 5.42E-12  | AAEL003172-PA OS=Aedes aegypti GN=AAEL003172 PE=4 SV=1                                                     |
| CCG022239.1 | 954  | 38   | 455 | 1.71158272 | 16.67297267 | 3.284108425  | Up   | 4.26E-14  | 1.45E-13  | AAEL004455-PA OS=Aedes aegypti GN=AAEL004455 PE=4 SV=1                                                     |
| CCG002890.1 | 1923 | 872  | 455 | 19.4849759 | 8.271459143 | -1.236148386 | Down | 1.12E-52  | 5.27E-52  | AAEL011814-PA OS=Aedes aegypti GN=AAEL011814 PE=4 SV=1                                                     |
| CCG022846.1 | 4911 | 1682 | 455 | 14.716981  | 3.238854802 | -2.183926051 | Down | 6.87E-225 | 4.17E-224 | AAEL014592-PA OS=Aedes aegypti GN=AAEL014592 PE=4 SV=1                                                     |
| CCG024922.1 | 2676 | 22   | 456 | 0.35326389 | 5.957015773 | 4.075771599  | Up   | 8.38E-11  | 1.80E-10  | AAEL006140-PA OS=Aedes aegypti GN=AAEL006140 PE=3 SV=1                                                     |
| CCG025394.1 | 2361 | 60   | 456 | 1.09198817 | 6.751789161 | 2.628312622  | Up   | 0         | 0         | Ubiquitin conjugating enzyme 7 interacting protein OS=Culex quinquefasciatus GN=CpipJ_CPIJ017240 PE=4 SV=1 |
| CCG013792.1 | 1323 | 85   | 456 | 2.76071613 | 12.04911127 | 2.125812282  | Up   | 0         | 0         | AAEL013391-PA OS=Aedes aegypti GN=AAEL013391 PE=4 SV=1                                                     |
| CCG026959.1 | 1214 | 90   | 456 | 3.18556517 | 13.13095075 | 2.043350122  | Up   | 0         | 0         | AAEL005070-PA OS=Aedes aegypti GN=AAEL005070 PE=4 SV=1                                                     |
| CCG004794.1 | 1614 | 126  | 456 | 3.3545146  | 9.876687861 | 1.557923294  | Up   | 1.34E-13  | 4.06E-13  | AAEL011017-PA OS=Aedes aegypti GN=AAEL011017 PE=4 SV=1                                                     |
| CCG012847.1 | 1194 | 127  | 456 | 4.57048266 | 13.35089967 | 1.546518531  | Up   | 1.57E-13  | 4.67E-13  | AAEL011058-PA (Fragment) OS=Aedes aegypti GN=AAEL011058 PE=4 SV=1                                          |
| CCG026580.1 | 2244 | 169  | 456 | 3.2361342  | 7.103820948 | 1.134323782  | Up   | 0         | 0         | AAEL003147-PA OS=Aedes aegypti GN=AAEL003147 PE=4 SV=1                                                     |
| CCG012658.1 | 1164 | 48   | 457 | 1.77194782 | 13.72502791 | 2.953401058  | Up   | 5.35E-14  | 1.79E-13  | AAEL001917-PA OS=Aedes aegypti GN=AAEL001917 PE=4 SV=1                                                     |
| CCG013914.1 | 1337 | 99   | 457 | 3.18175297 | 11.94908937 | 1.909006939  | Up   | 0         | 0         | AAEL002808-PA OS=Aedes aegypti GN=AAEL002808 PE=3 SV=1                                                     |
| CCG020697.1 | 1407 | 113  | 457 | 3.45101635 | 11.35460731 | 1.718184596  | Up   | 1.42E-13  | 4.26E-13  | AAEL009727-PA OS=Aedes aegypti GN=AAEL009727 PE=4 SV=1                                                     |
| CCG026602.1 | 1471 | 145  | 457 | 4.23562986 | 10.86059312 | 1.358454469  | Up   | 0         | 0         | AAEL003822-PA OS=Aedes aegypti GN=AAEL003822 PE=4 SV=1                                                     |

|             |      |      |     |            |             |              |      |          |          |                                                                                                    |
|-------------|------|------|-----|------------|-------------|--------------|------|----------|----------|----------------------------------------------------------------------------------------------------|
| CCG006553.1 | 1872 | 155  | 457 | 3.5578573  | 8.534151968 | 1.262239154  | Up   | 3.42E-13 | 9.27E-13 | AAEL010006-PA OS=Aedes aegypti GN=AAEL010006 PE=4 SV=1                                             |
| CCG017773.1 | 786  | 109  | 458 | 5.95890722 | 20.37009003 | 1.773332667  | Up   | 0        | 0        | Activin receptor type I OS=Culex quinquefasciatus GN=CpipJ_CPIJ017088 PE=4 SV=1                    |
| CCG020079.1 | 3109 | 151  | 458 | 2.08698293 | 5.149852287 | 1.303112253  | Up   | 0        | 0        | AAEL011162-PA OS=Aedes aegypti GN=AAEL011162 PE=4 SV=1                                             |
| CCG000948.1 | 603  | 2399 | 458 | 170.952559 | 26.55205765 | -2.68670045  | Down | 0        | 0        | AAEL008166-PA OS=Aedes aegypti GN=AAEL008166 PE=3 SV=1                                             |
| CCG019598.1 | 702  | 60   | 459 | 3.67262689 | 22.85733481 | 2.637772952  | Up   | 0        | 0        | AAEL007351-PA OS=Aedes aegypti GN=AAEL007351 PE=4 SV=1                                             |
| CCG011422.1 | 1824 | 84   | 459 | 1.97886936 | 8.797066359 | 2.152346124  | Up   | 0        | 0        | AAEL005297-PA OS=Aedes aegypti GN=AAEL005297 PE=4 SV=1                                             |
| CCG018211.1 | 972  | 122  | 459 | 5.3933206  | 16.50807514 | 1.61392621   | Up   | 8.04E-14 | 2.58E-13 | AAEL002939-PA OS=Aedes aegypti GN=AAEL002939 PE=4 SV=1                                             |
| CCG025694.1 | 357  | 184  | 459 | 22.146866  | 44.94635585 | 1.021101591  | Up   | 3.33E-13 | 9.08E-13 | AAEL003764-PA OS=Aedes aegypti GN=AAEL003764 PE=4 SV=1                                             |
| CCG011617.1 | 270  | 843  | 459 | 134.16106  | 59.42907051 | -1.174725274 | Down | 3.86E-47 | 1.78E-46 | Activating transcription factor OS=Aedes aegypti PE=2 SV=1                                         |
| CCG017906.1 | 2157 | 34   | 460 | 0.67731617 | 7.455172608 | 3.460340414  | Up   | 8.82E-14 | 2.79E-13 | DNA mismatch repair protein spellchecker 1 OS=Culex quinquefasciatus GN=CpipJ_CPIJ017719 PE=3 SV=1 |
| CCG027796.1 | 1194 | 58   | 460 | 2.08730704 | 13.46801283 | 2.68982226   | Up   | 0        | 0        | AAEL001321-PA OS=Aedes aegypti GN=AAEL001321 PE=3 SV=1                                             |
| CCG017543.1 | 564  | 65   | 460 | 4.95218573 | 28.51206971 | 2.525435442  | Up   | 0        | 0        | D-tyrosyl-tRNA(Tyr) deacylase OS=Aedes aegypti GN=AAEL014489 PE=3 SV=1                             |
| CCG014307.1 | 2698 | 122  | 460 | 1.9430347  | 5.960269576 | 1.617065917  | Up   | 8.04E-14 | 2.58E-13 | AAEL010559-PA OS=Aedes aegypti GN=AAEL010559 PE=4 SV=1                                             |
| CCG014662.1 | 477  | 180  | 460 | 16.2149942 | 33.71238431 | 1.055950158  | Up   | 3.32E-13 | 9.05E-13 | AAEL014545-PA OS=Aedes aegypti GN=AAEL014545 PE=4 SV=1                                             |
| CCG027345.2 | 549  | 768  | 460 | 60.110667  | 29.29108801 | -1.037159246 | Down | 1.69E-35 | 7.33E-35 | AAEL000288-PA OS=Aedes aegypti GN=AAEL000288 PE=4 SV=1                                             |



|             |       |      |     |            |             |              |      |           |           |                                                                    |
|-------------|-------|------|-----|------------|-------------|--------------|------|-----------|-----------|--------------------------------------------------------------------|
| CCG009803.1 | 33896 | 1059 | 460 | 1.34248728 | 0.474416076 | -1.500683619 | Down | 3.89E-85  | 2.00E-84  | AAEL005977-PA OS=Aedes aegypti GN=AAEL005977 PE=4 SV=1             |
| CCG020538.1 | 752   | 1067 | 460 | 60.969025  | 21.38405228 | -1.511541206 | Down | 1.13E-86  | 5.80E-86  | AAEL012352-PA OS=Aedes aegypti GN=AAEL012352 PE=4 SV=1             |
| CCG028211.1 | 3294  | 2824 | 460 | 36.8386553 | 4.881848001 | -2.915721119 | Down | 0         | 0         | -                                                                  |
| CCG024623.1 | 489   | 3    | 461 | 0.263618   | 32.95657585 | 6.965973644  | Up   | 5.28E-05  | 8.84E-05  | Predicted protein OS=Nematostella vectensis GN=v1g229551 PE=3 SV=1 |
| CCG024252.1 | 804   | 8    | 461 | 0.42755955 | 20.04448457 | 5.550936144  | Up   | 2.19E-06  | 3.97E-06  | AAEL008084-PA OS=Aedes aegypti GN=AAEL008084 PE=4 SV=1             |
| CCG015694.1 | 1413  | 13   | 461 | 0.39533372 | 11.40535428 | 4.850496426  | Up   | 6.34E-08  | 1.23E-07  | DNA primase OS=Aedes aegypti GN=AAEL014314 PE=3 SV=1               |
| CCG003819.1 | 807   | 17   | 461 | 0.90518648 | 19.96996975 | 4.463473303  | Up   | 3.39E-09  | 6.88E-09  | AAEL004960-PA OS=Aedes aegypti GN=AAEL004960 PE=4 SV=1             |
| CCG005578.1 | 1953  | 33   | 461 | 0.7260631  | 8.251800098 | 3.506542025  | Up   | 1.31E-13  | 4.01E-13  | AAEL007882-PA OS=Aedes aegypti GN=AAEL007882 PE=4 SV=1             |
| CCG005961.1 | 2040  | 50   | 461 | 1.05317977 | 7.899885094 | 2.907079954  | Up   | 0         | 0         | AAEL015662-PA OS=Aedes aegypti GN=AAEL015662 PE=4 SV=1             |
| CCG017263.1 | 873   | 170  | 461 | 8.36753137 | 18.46021259 | 1.141545208  | Up   | 3.53E-13  | 9.52E-13  | AAEL006867-PA OS=Aedes aegypti GN=AAEL006867 PE=4 SV=1             |
| CCG009112.1 | 1127  | 934  | 461 | 35.6111199 | 14.29970328 | -1.316342595 | Down | 5.85E-62  | 2.84E-61  | -                                                                  |
| CCG009181.1 | 693   | 32   | 462 | 1.98417245 | 23.30551785 | 3.554062245  | Up   | 1.77E-13  | 5.16E-13  | AAEL009789-PA OS=Aedes aegypti GN=AAEL009789 PE=4 SV=1             |
| CCG002900.1 | 1650  | 56   | 462 | 1.45836675 | 9.788317496 | 2.746707323  | Up   | 0         | 0         | AAEL012679-PA OS=Aedes aegypti GN=AAEL012679 PE=4 SV=1             |
| CCG016578.1 | 937   | 76   | 462 | 3.48527196 | 17.23663166 | 2.306134732  | Up   | 0         | 0         | AAEL010083-PA OS=Aedes aegypti GN=IMD PE=4 SV=1                    |
| CCG027802.1 | 2494  | 98   | 462 | 1.68846591 | 6.475831543 | 1.939352401  | Up   | 0         | 0         | AAEL003170-PA OS=Aedes aegypti GN=AAEL003170 PE=4 SV=1             |
| CCG002477.3 | 1764  | 156  | 462 | 3.80004456 | 9.155739155 | 1.268660026  | Up   | 1.42E-13  | 4.27E-13  | AAEL009764-PB OS=Aedes aegypti GN=AAEL009764 PE=4 SV=1             |
| CCG014367.1 | 510   | 940  | 462 | 79.1991187 | 31.66808602 | -1.322454701 | Down | 8.75E-63  | 4.25E-62  | AAEL014863-PA OS=Aedes aegypti GN=AAEL014863 PE=4 SV=1             |
| CCG010544.1 | 1287  | 1261 | 462 | 42.1016592 | 12.549125   | -1.746290315 | Down | 1.52E-125 | 8.37E-125 | AAEL014318-PA OS=Aedes aegypti GN=AAEL014318 PE=4 SV=1             |

|             |       |      |     |            |             |              |      |           |           |                                                                                     |
|-------------|-------|------|-----|------------|-------------|--------------|------|-----------|-----------|-------------------------------------------------------------------------------------|
| CCG002490.1 | 477   | 7    | 463 | 0.63058311 | 33.93224768 | 5.749826665  | Up   | 4.31E-06  | 7.69E-06  | -                                                                                   |
| CCG021695.1 | 1848  | 23   | 463 | 0.53479648 | 8.75848601  | 4.033619631  | Up   | 4.01E-11  | 8.66E-11  | AAEL000938-PA OS=Aedes aegypti GN=AAEL000938 PE=4 SV=1                              |
| CCG008117.1 | 495   | 46   | 463 | 3.99314705 | 32.69834777 | 3.033619631  | Up   | 3.40E-14  | 1.18E-13  | AAEL011767-PA OS=Aedes aegypti GN=AAEL011767 PE=4 SV=1                              |
| CCG012559.1 | 1035  | 53   | 463 | 2.20038255 | 15.63834024 | 2.829261133  | Up   | 0         | 0         | AAEL011684-PA OS=Aedes aegypti GN=AAEL011684 PE=4 SV=1                              |
| CCG008181.1 | 780   | 137  | 463 | 7.54724826 | 20.75087455 | 1.459149504  | Up   | 2.90E-13  | 8.04E-13  | AAEL006290-PA OS=Aedes aegypti GN=AAEL006290 PE=4 SV=1                              |
| CCG012339.1 | 1587  | 140  | 463 | 3.79065082 | 10.19891755 | 1.42789857   | Up   | 0         | 0         | AAEL007810-PA OS=Aedes aegypti GN=CYP4D23 PE=3 SV=2                                 |
| CCG026111.1 | 2601  | 147  | 463 | 2.42850865 | 6.222868953 | 1.357509242  | Up   | 7.02E-14  | 2.29E-13  | AAEL013943-PB (Fragment) OS=Aedes aegypti GN=AAEL013943 PE=4 SV=1                   |
| CCG007251.1 | 23177 | 861  | 463 | 1.59627827 | 0.698351044 | -1.19268784  | Down | 2.99E-49  | 1.39E-48  | AAEL010879-PA OS=Aedes aegypti GN=AAEL010879 PE=4 SV=1                              |
| CCG020015.2 | 1452  | 1324 | 463 | 39.181769  | 11.14716401 | -1.81350582  | Down | 8.36E-139 | 4.70E-138 | AAEL008309-PA OS=Aedes aegypti GN=AAEL008309 PE=4 SV=1                              |
| CCG011763.1 | 981   | 1573 | 463 | 68.9005021 | 16.49916631 | -2.062121368 | Down | 1.70E-195 | 1.01E-194 | AAEL006966-PA OS=Aedes aegypti GN=AAEL006966 PE=3 SV=1                              |
| CCG027449.1 | 1979  | 1641 | 463 | 35.6307905 | 8.178717608 | -2.123177936 | Down | 1.06E-211 | 6.34E-211 | AAEL000119-PA OS=Aedes aegypti GN=AAEL000119 PE=4 SV=1                              |
| CCG019874.1 | 1914  | 3648 | 463 | 81.8984283 | 8.456469251 | -3.275708427 | Down | 0         | 0         | AAEL003434-PA OS=Aedes aegypti GN=AAEL003434 PE=4 SV=1                              |
| CCG002444.1 | 2242  | 46   | 464 | 0.88162703 | 7.234897601 | 3.036732243  | Up   | 3.40E-14  | 1.18E-13  | AAEL011047-PA (Fragment) OS=Aedes aegypti GN=AAEL011047 PE=4 SV=1                   |
| CCG005012.1 | 1551  | 110  | 464 | 3.04749891 | 10.45818209 | 1.778934485  | Up   | 0         | 0         | AAEL008547-PA OS=Aedes aegypti GN=AAEL008547 PE=4 SV=1                              |
| CCG016105.1 | 804   | 121  | 464 | 6.46683817 | 20.1749259  | 1.641430962  | Up   | 0         | 0         | Chip-domain serine protease OS=Culex quinquefasciatus GN=CpipJ_CPIJ000615 PE=3 SV=1 |
| CCG005444.1 | 1317  | 138  | 464 | 4.50252344 | 12.31635567 | 1.451769742  | Up   | 1.49E-13  | 4.45E-13  | AAEL003885-PA OS=Aedes aegypti GN=AAEL003885 PE=4 SV=1                              |

|             |       |      |     |            |             |              |      |           |           |                                                                      |
|-------------|-------|------|-----|------------|-------------|--------------|------|-----------|-----------|----------------------------------------------------------------------|
| CCG005124.1 | 485   | 153  | 464 | 13.5554008 | 33.44461943 | 1.302906356  | Up   | 0         | 0         | AAEL003985-PA OS=Aedes aegypti GN=AAEL003985 PE=4 SV=1               |
| CCG008832.1 | 648   | 174  | 464 | 11.5381695 | 25.0318525  | 1.117350703  | Up   | 1.78E-13  | 5.19E-13  | AAEL004425-PA OS=Aedes aegypti GN=AAEL004425 PE=4 SV=1               |
| CCG005021.1 | 1031  | 177  | 464 | 7.37695735 | 15.73291991 | 1.092688649  | Up   | 0         | 0         | AAEL013113-PA OS=Aedes aegypti GN=AAEL013113 PE=4 SV=1               |
| CCG001045.1 | 705   | 62   | 465 | 3.77889865 | 23.05758681 | 2.609203799  | Up   | 0         | 0         | AAEL006646-PA OS=Aedes aegypti GN=AAEL006646 PE=4 SV=1               |
| CCG018974.1 | 1569  | 68   | 465 | 1.8622957  | 10.36048356 | 2.475937269  | Up   | 0         | 0         | AAEL012628-PA OS=Aedes aegypti GN=AAEL012628 PE=4 SV=1               |
| CCG000367.1 | 1535  | 94   | 465 | 2.63137137 | 10.58996658 | 2.008811258  | Up   | 0         | 0         | AAEL007980-PA OS=Aedes aegypti GN=AAEL007980 PE=4 SV=1               |
| CCG018719.1 | 1224  | 137  | 465 | 4.80952095 | 13.28071789 | 1.465368027  | Up   | 2.90E-13  | 8.04E-13  | AAEL005368-PA OS=Aedes aegypti GN=AAEL005368 PE=4 SV=1               |
| CCG022181.1 | 1664  | 1592 | 465 | 41.1104672 | 9.768989603 | -2.073224511 | Down | 3.21E-199 | 1.92E-198 | AAEL007218-PA OS=Aedes aegypti GN=AAEL007218 PE=4 SV=1               |
| CCG023975.1 | 1203  | 8    | 466 | 0.28575052 | 13.54161012 | 5.566499348  | Up   | 2.19E-06  | 3.96E-06  | AAEL007000-PA OS=Aedes aegypti GN=AAEL007000 PE=4 SV=1               |
| CCG024058.1 | 2240  | 42   | 466 | 0.80568252 | 7.272570079 | 3.174181926  | Up   | 7.66E-14  | 2.47E-13  | AAEL013014-PA OS=Aedes aegypti GN=AAEL013014 PE=4 SV=1               |
| CCG017816.1 | 702   | 158  | 466 | 9.67125081 | 23.20592162 | 1.2627186    | Up   | 0         | 0         | AAEL005915-PA OS=Aedes aegypti GN=AAEL005915 PE=4 SV=1               |
| CCG023779.1 | 1648  | 955  | 466 | 24.900544  | 9.885046709 | -1.332857574 | Down | 1.62E-64  | 7.90E-64  | AAEL001645-PA OS=Aedes aegypti GN=AAEL001645 PE=4 SV=1               |
| CCG005848.1 | 10089 | 2447 | 466 | 10.4219388 | 1.614685001 | -2.690299038 | Down | 0         | 0         | AAEL001184-PA OS=Aedes aegypti GN=AAEL001184 PE=4 SV=1               |
| CCG017831.1 | 192   | 6    | 467 | 1.34280421 | 85.02872527 | 5.984629443  | Up   | 8.38E-06  | 1.47E-05  | Putative salivary basic peptide 4.2k-1 OS=Aedes albopictus PE=4 SV=1 |
| CCG013394.1 | 792   | 33   | 467 | 1.79040561 | 20.61302431 | 3.525197824  | Up   | 1.31E-13  | 4.01E-13  | Glyoxylase 3 OS=Aedes aegypti PE=2 SV=1                              |
| CCG020190.1 | 1155  | 94   | 467 | 3.49710394 | 14.13464524 | 2.015003092  | Up   | 0         | 0         | AAEL012784-PA OS=Aedes aegypti GN=AAEL012784 PE=4 SV=1               |
| CCG012855.1 | 1314  | 126  | 467 | 4.12038551 | 12.42428862 | 1.59231202   | Up   | 1.34E-13  | 4.06E-13  | AAEL003415-PA OS=Aedes aegypti GN=AAEL003415 PE=4 SV=1               |

|             |      |      |     |            |             |              |      |           |           |                                                                                          |
|-------------|------|------|-----|------------|-------------|--------------|------|-----------|-----------|------------------------------------------------------------------------------------------|
| CCG022462.1 | 2676 | 55   | 468 | 0.88315972 | 6.113779346 | 2.79131821   | Up   | 0         | 0         | AAEL004136-PA OS=Aedes aegypti GN=AAEL004136 PE=4 SV=1                                   |
| CCG012896.1 | 1235 | 75   | 468 | 2.60949805 | 13.24734699 | 2.343859233  | Up   | 0         | 0         | AAEL009502-PA OS=Aedes aegypti GN=AAEL009502 PE=4 SV=1                                   |
| CCG007547.1 | 723  | 130  | 468 | 7.72623167 | 22.62859409 | 1.55031011   | Up   | 0         | 0         | Uncharacterized protein OS=Anopheles darlingi GN=AND_22817 PE=4 SV=1                     |
| CCG010300.1 | 2190 | 132  | 468 | 2.58995661 | 7.470535858 | 1.528283804  | Up   | 1.46E-13  | 4.36E-13  | AAEL012505-PA OS=Aedes aegypti GN=AAEL012505 PE=4 SV=1                                   |
| CCG011959.1 | 2319 | 189  | 468 | 3.50206116 | 7.05496918  | 1.010435499  | Up   | 2.34E-13  | 6.65E-13  | AAEL012975-PA OS=Aedes aegypti GN=AAEL012975 PE=4 SV=1                                   |
| CCG022104.1 | 449  | 1017 | 468 | 97.3278844 | 36.43758024 | -1.41742604  | Down | 3.21E-75  | 1.61E-74  | AAEL007764-PA OS=Aedes aegypti GN=AAEL007764 PE=4 SV=1                                   |
| CCG009881.1 | 938  | 1238 | 468 | 56.7127201 | 17.44186943 | -1.701117676 | Down | 7.68E-119 | 4.20E-118 | AAEL010955-PA OS=Aedes aegypti GN=AAEL010955 PE=4 SV=1                                   |
| CCG009401.1 | 1557 | 1252 | 468 | 34.5524134 | 10.50769013 | -1.717340924 | Down | 8.86E-122 | 4.86E-121 | AAEL011677-PA OS=Aedes aegypti GN=AAEL011677 PE=4 SV=1                                   |
| CCG017485.1 | 540  | 8    | 469 | 0.63658866 | 30.36191075 | 5.575757316  | Up   | 2.19E-06  | 3.96E-06  | Putative salivary protein 34k-1 OS=Aedes albopictus PE=2 SV=1                            |
| CCG026337.1 | 1165 | 35   | 469 | 1.29093623 | 14.07333202 | 3.446474299  | Up   | 6.39E-14  | 2.11E-13  | -                                                                                        |
| CCG027985.1 | 1512 | 50   | 469 | 1.42095683 | 10.84353955 | 2.931901127  | Up   | 0         | 0         | AAEL001008-PA OS=Aedes aegypti GN=AAEL001008 PE=4 SV=1                                   |
| CCG014679.1 | 2559 | 60   | 469 | 1.00749671 | 6.406968271 | 2.668866721  | Up   | 0         | 0         | AAEL000707-PA OS=Aedes aegypti GN=AAEL000707 PE=4 SV=1                                   |
| CCG019160.1 | 867  | 148  | 469 | 7.33508734 | 18.91053265 | 1.366303951  | Up   | 0         | 0         | Putative uncharacterized protein OS=Culex quinquefasciatus GN=CpipJ_CPIJ011649 PE=4 SV=1 |
| CCG005531.1 | 1035 | 182  | 469 | 7.55603063 | 15.84099691 | 1.067962676  | Up   | 0         | 0         | AAEL006868-PA OS=Aedes aegypti GN=AAEL006868 PE=3 SV=1                                   |
| CCG008642.1 | 1952 | 876  | 469 | 19.2835489 | 8.399299081 | -1.199029743 | Down | 1.73E-50  | 8.06E-50  | -                                                                                        |
| CCG016415.1 | 1683 | 2036 | 469 | 51.9824003 | 9.741789546 | -2.41576453  | Down | 8.00E-308 | 5.06E-307 | Purine nucleoside phosphorylase OS=Culex quinquefasciatus GN=CpipJ_CPIJ007359 PE=3 SV=1  |
| CCG006332.1 | 2484 | 38   | 470 | 0.65734699 | 6.614488761 | 3.330902637  | Up   | 4.26E-14  | 1.45E-13  | AAEL007980-PA OS=Aedes aegypti GN=AAEL007980 PE=4 SV=1                                   |

|             |      |     |     |            |             |             |      |          |          |                                                                                          |
|-------------|------|-----|-----|------------|-------------|-------------|------|----------|----------|------------------------------------------------------------------------------------------|
| CCG023704.1 | 537  | 57  | 470 | 4.56103328 | 30.59662958 | 2.745940136 | Up   | 0        | 0        | AAEL007838-PA OS=Aedes aegypti GN=AAEL007838 PE=4 SV=1                                   |
| CCG005109.1 | 2150 | 111 | 470 | 2.21843746 | 7.642041899 | 1.784414284 | Up   | 0        | 0        | AAEL006013-PA OS=Aedes aegypti GN=AAEL006013 PE=4 SV=1                                   |
| CCG018243.1 | 355  | 118 | 470 | 14.2828977 | 46.28278897 | 1.696187101 | Up   | 0        | 0        | AAEL013457-PA OS=Aedes aegypti GN=AAEL013457 PE=4 SV=1                                   |
| CCG002103.1 | 3120 | 147 | 470 | 2.02453557 | 5.266150668 | 1.379157806 | Up   | 7.02E-14 | 2.29E-13 | Putative uncharacterized protein OS=Culex quinquefasciatus GN=CpipJ_CPIJ003554 PE=4 SV=1 |
| CCG013975.1 | 747  | 13  | 471 | 0.74779993 | 22.04196568 | 4.881456735 | Up   | 6.34E-08 | 1.23E-07 | AAEL010421-PA OS=Aedes aegypti GN=AAEL010421 PE=4 SV=1                                   |
| CCG006786.1 | 1431 | 40  | 471 | 1.20111068 | 11.50618334 | 3.259968359 | Up   | 6.86E-14 | 2.25E-13 | Ryndremine 5-monooxygenase OS=Culex quinquefasciatus GN=CpipJ_CPIJ017147 PE=4 SV=1       |
| CCG017659.2 | 2324 | 66  | 471 | 1.22031088 | 7.084917539 | 2.537502334 | Up   | 0        | 0        | AAEL000853-PA OS=Aedes aegypti GN=AAEL000853 PE=4 SV=1                                   |
| CCG005084.1 | 678  | 100 | 471 | 6.33771897 | 24.28517457 | 1.938040264 | Up   | 0        | 0        | AAEL005512-PA OS=Aedes aegypti GN=AAEL005512 PE=4 SV=1                                   |
| CCG007306.1 | 3723 | 112 | 471 | 1.29266996 | 4.422602299 | 1.774541531 | Up   | 0        | 0        | Putative uncharacterized protein OS=Culex quinquefasciatus GN=CpipJ_CPIJ008434 PE=4 SV=1 |
| CCG004826.1 | 966  | 116 | 471 | 5.15992672 | 17.04487408 | 1.723915458 | Up   | 1.16E-13 | 3.59E-13 | AAEL010099-PA OS=Aedes aegypti GN=AAEL010099 PE=4 SV=1                                   |
| CCG019629.2 | 621  | 773 | 471 | 53.4872864 | 26.51424857 | -1.01242815 | Down | 2.19E-34 | 9.44E-34 | AAEL004902-PA OS=Aedes aegypti GN=AAEL004902 PE=3 SV=1                                   |
| CCG020629.1 | 4392 | 54  | 472 | 0.52831641 | 3.756900418 | 2.830068751 | Up   | 0        | 0        | AAEL005539-PA OS=Aedes aegypti GN=AAEL005539 PE=4 SV=1                                   |
| CCG015764.1 | 1503 | 72  | 472 | 2.0584304  | 10.97824793 | 2.415031252 | Up   | 0        | 0        | AAEL014410-PA OS=Aedes aegypti GN=AAEL014410 PE=4 SV=1                                   |
| CCG009303.1 | 1569 | 106 | 472 | 2.90299036 | 10.51644782 | 1.857035799 | Up   | 0        | 0        | AAEL007778-PA OS=Aedes aegypti GN=AAEL007778 PE=4 SV=1                                   |
| CCG011836.1 | 1767 | 108 | 472 | 2.62633352 | 9.338034316 | 1.830068751 | Up   | 0        | 0        | AAEL004866-PA OS=Aedes aegypti GN=AAEL004866 PE=4 SV=1                                   |
| CCG001537.1 | 2104 | 179 | 472 | 3.6556951  | 7.842351063 | 1.101140476 | Up   | 0        | 0        | AAEL009500-PA OS=Aedes aegypti GN=AAEL009500 PE=4 SV=1                                   |

|             |      |      |     |            |             |              |      |           |            |                                                                   |
|-------------|------|------|-----|------------|-------------|--------------|------|-----------|------------|-------------------------------------------------------------------|
| CCG019931.1 | 3507 | 1556 | 472 | 19.0649863 | 4.704963398 | -2.018670092 | Down | 4.37E-188 | 2.58E-187  | AAEL009821-PA OS=Aedes aegypti GN=AAEL009821 PE=4 SV=1            |
| CCG006331.1 | 1470 | 40   | 473 | 1.16924448 | 11.24847953 | 3.266081482  | Up   | 6.86E-14  | 2.24E-13   | AAEL007980-PA OS=Aedes aegypti GN=AAEL007980 PE=4 SV=1            |
| CCG028222.1 | 861  | 48   | 473 | 2.39552527 | 19.20472115 | 3.003047076  | Up   | 5.35E-14  | 1.79E-13   | AAEL010253-PA OS=Aedes aegypti GN=AAEL010253 PE=4 SV=1            |
| CCG016040.1 | 1020 | 71   | 473 | 2.99103055 | 16.21104403 | 2.438262458  | Up   | 0         | 0          | AAEL003455-PA OS=Aedes aegypti GN=AAEL003455 PE=4 SV=1            |
| CCG028422.2 | 3822 | 133  | 473 | 1.49528381 | 4.326338282 | 1.532727142  | Up   | 9.90E-14  | 3.11E-13   | AAEL001410-PA (Fragment) OS=Aedes aegypti GN=AAEL001410 PE=4 SV=1 |
| CCG010863.1 | 729  | 2    | 474 | 0.11788679 | 22.73007296 | 7.591056453  | Up   | 9.36E-05  | 0.00015387 | NOS protein OS=Aedes aegypti GN=nos PE=2 SV=1                     |
| CCG026299.1 | 1228 | 104  | 474 | 3.63913062 | 13.49366709 | 1.890616735  | Up   | 0         | 0          | AAEL013314-PA OS=Aedes aegypti GN=AAEL013314 PE=4 SV=1            |
| CCG003275.1 | 1200 | 117  | 474 | 4.18954912 | 13.80851933 | 1.720691733  | Up   | 9.44E-14  | 2.97E-13   | AAEL007896-PA (Fragment) OS=Aedes aegypti GN=AAEL007896 PE=4 SV=1 |
| CCG027365.1 | 3556 | 142  | 474 | 1.71588929 | 4.659792798 | 1.441309333  | Up   | 2.62E-13  | 7.35E-13   | AAEL005272-PA OS=Aedes aegypti GN=AAEL005272 PE=4 SV=1            |
| CCG009515.2 | 1206 | 174  | 474 | 6.19961345 | 13.73982022 | 1.148112957  | Up   | 1.78E-13  | 5.20E-13   | AAEL001378-PA OS=Aedes aegypti GN=AAEL001378 PE=4 SV=1            |
| CCG007421.1 | 2265 | 1523 | 474 | 28.8931151 | 7.315771828 | -1.981643774 | Down | 1.09E-179 | 6.37E-179  | AAEL004086-PA OS=Aedes aegypti GN=AAEL004086 PE=4 SV=1            |
| CCG011318.1 | 627  | 15   | 475 | 1.02798408 | 26.48354301 | 4.687206311  | Up   | 1.48E-08  | 2.92E-08   | Putative 23.4 kDa salivary protein OS=Aedes albopictus PE=2 SV=1  |
| CCG022997.1 | 1446 | 44   | 475 | 1.30751613 | 11.48352799 | 3.134665288  | Up   | 3.91E-14  | 1.35E-13   | AAEL005068-PA OS=Aedes aegypti GN=AAEL005068 PE=4 SV=1            |
| CCG026331.1 | 2175 | 89   | 475 | 1.75830178 | 7.634566192 | 2.118363476  | Up   | 0         | 0          | AAEL009731-PA OS=Aedes aegypti GN=AAEL009731 PE=4 SV=1            |
| CCG003715.1 | 2061 | 178  | 475 | 3.7111173  | 8.056856607 | 1.118363476  | Up   | 1.15E-13  | 3.57E-13   | AAEL002151-PA OS=Aedes aegypti GN=AAEL002151 PE=4 SV=1            |
| CCG004359.1 | 252  | 802  | 475 | 136.752886 | 65.89357725 | -1.053361519 | Down | 6.56E-38  | 2.89E-37   | AAEL008785-PA OS=Aedes aegypti GN=AAEL008785 PE=4 SV=1            |

|             |      |     |     |            |             |             |    |          |          |                                                                   |
|-------------|------|-----|-----|------------|-------------|-------------|----|----------|----------|-------------------------------------------------------------------|
| CCG008816.1 | 3435 | 40  | 476 | 0.50037537 | 4.844291046 | 3.275202872 | Up | 6.86E-14 | 2.24E-13 | AAEL007237-PA OS=Aedes aegypti GN=AAEL007237 PE=4 SV=1            |
| CCG018429.1 | 387  | 88  | 476 | 9.77089573 | 42.99777712 | 2.137699348 | Up | 2.93E-14 | 1.02E-13 | AAEL006557-PA OS=Aedes aegypti GN=AAEL006557 PE=4 SV=1            |
| CCG007579.1 | 741  | 121 | 476 | 7.01665032 | 22.45632894 | 1.67826773  | Up | 0        | 0        | AAEL002459-PA OS=Aedes aegypti GN=AAEL002459 PE=4 SV=1            |
| CCG007769.1 | 364  | 21  | 477 | 2.47902315 | 45.81070885 | 4.207841237 | Up | 1.76E-10 | 3.72E-10 | -                                                                 |
| CCG010803.1 | 1710 | 92  | 477 | 2.31182198 | 9.75151931  | 2.076596704 | Up | 1.44E-14 | 5.11E-14 | AAEL013548-PA OS=Aedes aegypti GN=AAEL013548 PE=4 SV=1            |
| CCG027354.1 | 381  | 98  | 477 | 11.0525827 | 43.76666147 | 1.985448816 | Up | 0        | 0        | AAEL005909-PA OS=Aedes aegypti GN=AAEL005909 PE=4 SV=1            |
| CCG018510.1 | 549  | 153 | 477 | 11.9751719 | 30.37358474 | 1.342770817 | Up | 0        | 0        | AAEL010361-PA OS=Aedes aegypti GN=AAEL010361 PE=4 SV=1            |
| CCG018982.1 | 1079 | 154 | 477 | 6.13284442 | 15.45421503 | 1.333372119 | Up | 1.82E-13 | 5.28E-13 | AAEL010591-PA OS=Aedes aegypti GN=GSTD6 PE=3 SV=1                 |
| CCG016126.1 | 1314 | 26  | 478 | 0.85023828 | 12.71693782 | 3.902740294 | Up | 4.60E-12 | 1.05E-11 | AAEL006750-PA OS=Aedes aegypti GN=AAEL006750 PE=4 SV=1            |
| CCG020652.1 | 2574 | 27  | 478 | 0.45073148 | 6.491863363 | 3.84829251  | Up | 2.28E-12 | 5.41E-12 | AAEL010080-PA OS=Aedes aegypti GN=AAEL010080 PE=4 SV=1            |
| CCG025929.1 | 1854 | 135 | 478 | 3.12886417 | 9.012975349 | 1.526364415 | Up | 1.90E-13 | 5.49E-13 | AAEL000639-PA OS=Aedes aegypti GN=AAEL000639 PE=3 SV=1            |
| CCG005893.1 | 4131 | 172 | 478 | 1.78910539 | 4.045039046 | 1.176915257 | Up | 1.35E-13 | 4.09E-13 | AAEL012549-PA (Fragment) OS=Aedes aegypti GN=AAEL012549 PE=4 SV=1 |
| CCG001703.1 | 2149 | 15  | 479 | 0.29992835 | 7.792003059 | 4.699304454 | Up | 1.48E-08 | 2.93E-08 | AAEL009411-PA OS=Aedes aegypti GN=AAEL009411 PE=4 SV=1            |
| CCG018876.1 | 1030 | 63  | 479 | 2.6282459  | 16.2572957  | 2.628915126 | Up | 0        | 0        | -                                                                 |
| CCG028533.1 | 1335 | 71  | 479 | 2.28528177 | 12.54308208 | 2.45644793  | Up | 0        | 0        | AAEL007318-PA OS=Aedes aegypti GN=AAEL007318 PE=4 SV=1            |
| CCG000154.1 | 2273 | 78  | 479 | 1.47454435 | 7.366922382 | 2.320792831 | Up | 0        | 0        | AAEL001250-PA OS=Aedes aegypti GN=AAEL001250 PE=4 SV=1            |
| CCG015894.1 | 921  | 83  | 479 | 3.87240822 | 18.18134047 | 2.231155618 | Up | 1.32E-13 | 4.02E-13 | AAEL006697-PA OS=Aedes aegypti GN=AAEL006697 PE=4 SV=1            |
| CCG015617.1 | 1065 | 113 | 479 | 4.55923006 | 15.72301838 | 1.786016087 | Up | 1.42E-13 | 4.27E-13 | AAEL007857-PA OS=Aedes aegypti GN=AAEL007857 PE=4 SV=1            |

|             |      |      |     |            |             |              |      |           |           |                                                                             |
|-------------|------|------|-----|------------|-------------|--------------|------|-----------|-----------|-----------------------------------------------------------------------------|
| CCG007337.1 | 784  | 124  | 479 | 6.79623354 | 21.35843696 | 1.651998739  | Up   | 1.61E-13  | 4.76E-13  | -                                                                           |
| CCG003684.1 | 3213 | 134  | 479 | 1.79207732 | 5.211644748 | 1.540105859  | Up   | 0         | 0         | AGAP009234-PA (Fragment)<br>OS=Anopheles gambiae<br>GN=AGAP009234 PE=3 SV=4 |
| CCG005170.1 | 1449 | 150  | 479 | 4.44821269 | 11.55625574 | 1.377376359  | Up   | 0         | 0         | AAEL015402-PA OS=Aedes<br>aegypti GN=AAEL015402 PE=4<br>SV=1                |
| CCG001073.1 | 2158 | 64   | 480 | 1.27435728 | 7.775705677 | 2.609203799  | Up   | 0         | 0         | AAEL005433-PA OS=Aedes<br>aegypti GN=AAEL005433 PE=4<br>SV=1                |
| CCG027275.1 | 996  | 89   | 480 | 3.83966504 | 16.8473623  | 2.133470368  | Up   | 0         | 0         | AAEL002282-PA OS=Aedes<br>aegypti GN=AAEL002282 PE=4<br>SV=1                |
| CCG013618.1 | 2340 | 130  | 480 | 2.38720748 | 7.170928569 | 1.586835986  | Up   | 0         | 0         | AAEL007610-PA OS=Aedes<br>aegypti GN=AAEL007610 PE=4<br>SV=1                |
| CCG015471.1 | 2257 | 142  | 480 | 2.70345694 | 7.434635734 | 1.45945668   | Up   | 2.62E-13  | 7.34E-13  | AAEL001151-PA OS=Aedes<br>aegypti GN=AAEL001151 PE=3<br>SV=1                |
| CCG004268.1 | 1632 | 155  | 480 | 4.08107161 | 10.28184611 | 1.333079394  | Up   | 3.42E-13  | 9.25E-13  | AAEL011925-PA OS=Aedes<br>aegypti GN=AAEL011925 PE=4<br>SV=1                |
| CCG019285.1 | 1128 | 156  | 480 | 5.94262287 | 14.87586246 | 1.323801581  | Up   | 1.42E-13  | 4.26E-13  | AAEL001656-PA OS=Aedes<br>aegypti GN=AAEL001656 PE=4<br>SV=1                |
| CCG021800.1 | 6177 | 1792 | 480 | 12.4658838 | 2.716524664 | -2.198151123 | Down | 1.94E-241 | 1.19E-240 | AAEL000239-PA OS=Aedes<br>aegypti GN=AAEL000239 PE=4<br>SV=1                |
| CCG027393.1 | 1896 | 2270 | 480 | 51.4458321 | 8.850196651 | -2.539272783 | Down | 0         | 0         | AAEL001232-PA OS=Aedes<br>aegypti GN=AAEL001232 PE=3<br>SV=1                |
| CCG011491.1 | 2742 | 3235 | 480 | 50.6955111 | 6.119610814 | -3.050346197 | Down | 0         | 0         | AAEL006085-PA OS=Aedes<br>aegypti GN=AAEL006085 PE=3<br>SV=1                |
| CCG007081.1 | 1488 | 9    | 481 | 0.25989759 | 11.30035694 | 5.442281286  | Up   | 1.09E-06  | 2.01E-06  | AAEL009709-PA OS=Aedes<br>aegypti GN=AAEL009709 PE=4<br>SV=1                |
| CCG006232.1 | 1112 | 28   | 481 | 1.08197173 | 15.12134094 | 3.804851366  | Up   | 1.17E-12  | 2.86E-12  | AAEL009918-PA OS=Aedes<br>aegypti GN=AAEL009918 PE=4<br>SV=1                |
| CCG027389.1 | 1602 | 29   | 481 | 0.77785412 | 10.49621169 | 3.754225292  | Up   | 6.66E-13  | 1.69E-12  | AAEL002849-PA OS=Aedes<br>aegypti GN=AAEL002849 PE=4<br>SV=1                |
| CCG009394.1 | 669  | 82   | 481 | 5.26684341 | 25.1344262  | 2.254654283  | Up   | 0         | 0         | AAEL008582-PA OS=Aedes<br>aegypti GN=AAEL008582 PE=4<br>SV=1                |
| CCG000911.1 | 1641 | 108  | 481 | 2.82798985 | 10.24675876 | 1.857318785  | Up   | 0         | 0         | AAEL013048-PA OS=Aedes<br>aegypti GN=AAEL013048 PE=4<br>SV=1                |



|             |      |      |     |            |             |              |      |           |           |                                                                                          |
|-------------|------|------|-----|------------|-------------|--------------|------|-----------|-----------|------------------------------------------------------------------------------------------|
| CCG025611.1 | 2067 | 1414 | 481 | 29.3948741 | 8.134944909 | -1.853360117 | Down | 1.37E-152 | 7.82E-152 | AAEL011520-PA OS=Aedes aegypti GN=AAEL011520 PE=4 SV=1                                   |
| CCG025340.1 | 1014 | 53   | 482 | 2.2459526  | 16.61724793 | 2.887282085  | Up   | 0         | 0         | AAEL012397-PA OS=Aedes aegypti GN=AAEL012397 PE=4 SV=1                                   |
| CCG013658.1 | 2169 | 85   | 482 | 1.68392229 | 7.768505949 | 2.205811604  | Up   | 0         | 0         | AAEL000125-PA OS=Aedes aegypti GN=AAEL006125 PE=4 SV=1                                   |
| CCG005815.1 | 343  | 814  | 482 | 101.974822 | 49.12504199 | -1.053682444 | Down | 1.81E-38  | 8.00E-38  | AAEL000958-PA OS=Aedes aegypti GN=AAEL000958 PE=4 SV=1                                   |
| CCG017584.1 | 2791 | 1199 | 482 | 18.4595886 | 6.037223004 | -1.612413403 | Down | 1.03E-106 | 5.52E-106 | AAEL002123-PA (Fragment) OS=Aedes aegypti GN=AAEL002123 PE=4 SV=1                        |
| CCG013553.1 | 1338 | 10   | 483 | 0.32114899 | 12.61946762 | 5.296264488  | Up   | 5.43E-07  | 1.01E-06  | AAEL000299-PA (Fragment) OS=Aedes aegypti GN=AAEL000299 PE=4 SV=1                        |
| CCG025762.1 | 1984 | 44   | 483 | 0.95295782 | 8.510507904 | 3.158760964  | Up   | 3.91E-14  | 1.35E-13  | Zinc finger protein 605 OS=Culex quinquefasciatus GN=CpipJ_CPIJ005857 PE=4 SV=1          |
| CCG028194.1 | 1482 | 45   | 483 | 1.30474903 | 11.39328454 | 3.126339486  | Up   | 0         | 0         | Zinc finger protein OS=Culex quinquefasciatus GN=CpipJ_CPIJ018272 PE=4 SV=1              |
| CCG016738.2 | 2160 | 71   | 483 | 1.41243109 | 7.817059112 | 2.468445463  | Up   | 0         | 0         | AAEL002404-PA OS=Aedes aegypti GN=AAEL002404 PE=3 SV=1                                   |
| CCG011392.1 | 816  | 93   | 483 | 4.89728593 | 20.6922153  | 2.079033772  | Up   | 4.04E-14  | 1.39E-13  | AAEL000645-PA OS=Aedes aegypti GN=AAEL000645 PE=4 SV=1                                   |
| CCG027675.1 | 845  | 183  | 483 | 9.30587152 | 19.98206826 | 1.102492744  | Up   | 3.05E-13  | 8.42E-13  | Putative uncharacterized protein OS=Culex quinquefasciatus GN=CpipJ_CPIJ017674 PE=4 SV=1 |
| CCG019970.1 | 954  | 45   | 484 | 2.02687427 | 17.73564566 | 3.129323345  | Up   | 0         | 0         | AAEL010791-PA OS=Aedes aegypti GN=AAEL010791 PE=4 SV=1                                   |
| CCG014396.1 | 1302 | 127  | 484 | 4.19136428 | 12.99524267 | 1.632491754  | Up   | 1.57E-13  | 4.67E-13  | Seryl-tRNA synthetase OS=Culex quinquefasciatus GN=CpipJ_CPIJ007184 PE=3 SV=1            |
| CCG027166.1 | 2123 | 145  | 484 | 2.93481466 | 7.96976258  | 1.441267351  | Up   | 0         | 0         | AAEL015129-PA OS=Aedes aegypti GN=AAEL015129 PE=4 SV=1                                   |

|             |      |      |     |            |             |              |      |           |           |                                                                                           |
|-------------|------|------|-----|------------|-------------|--------------|------|-----------|-----------|-------------------------------------------------------------------------------------------|
| CCG017749.1 | 2090 | 1433 | 484 | 29.4620238 | 8.095600937 | -1.863646453 | Down | 8.75E-156 | 5.00E-155 | AAEL000378-PA OS=Aedes aegypti GN=AAEL000378 PE=4 SV=1                                    |
| CCG003677.1 | 1678 | 1684 | 484 | 43.1233809 | 10.08331702 | -2.096499982 | Down | 1.10E-213 | 6.59E-213 | Putative nucleoside phosphorylase OS=Culex quinquefasciatus GN=CpipJ_CPIJ007359 PE=3 SV=1 |
| CCG024300.1 | 1479 | 132  | 485 | 3.83502702 | 11.4636675  | 1.579760022  | Up   | 1.46E-13  | 4.36E-13  | AAEL010803-PA (Fragment) OS=Aedes aegypti GN=AAEL010803 PE=3 SV=1                         |
| CCG026318.1 | 701  | 140  | 485 | 8.58168737 | 24.18653956 | 1.494871124  | Up   | 0         | 0         | AAEL003749-PA OS=Aedes aegypti GN=AAEL003749 PE=4 SV=1                                    |
| CCG002117.1 | 1332 | 163  | 485 | 5.25830836 | 12.72880198 | 1.275425987  | Up   | 1.80E-13  | 5.24E-13  | AAEL003885-PA OS=Aedes aegypti GN=AAEL003885 PE=4 SV=1                                    |
| CCG000714.1 | 1572 | 189  | 485 | 5.16620855 | 10.78547343 | 1.061911717  | Up   | 2.34E-13  | 6.64E-13  | AAEL014582-PA OS=Aedes aegypti GN=AAEL014582 PE=4 SV=1                                    |
| CCG026562.1 | 1641 | 935  | 485 | 24.4830602 | 10.33197089 | -1.244668414 | Down | 5.94E-57  | 2.84E-56  | -                                                                                         |
| CCG016998.1 | 837  | 8    | 486 | 0.41070236 | 20.29835425 | 5.627125707  | Up   | 2.19E-06  | 3.96E-06  | AAEL012659-PA OS=Aedes aegypti GN=AAEL012659 PE=4 SV=1                                    |
| CCG001280.1 | 2835 | 37   | 486 | 0.5608043  | 5.992847447 | 3.417672342  | Up   | 5.17E-14  | 1.74E-13  | AAEL003036-PA OS=Aedes aegypti GN=AAEL003036 PE=4 SV=1                                    |
| CCG011946.1 | 1508 | 46   | 486 | 1.31074787 | 11.26639424 | 3.103563751  | Up   | 3.40E-14  | 1.18E-13  | Putative uncharacterized protein OS=Culex quinquefasciatus GN=CpipJ_CPIJ003105 PE=4 SV=1  |
| CCG014232.1 | 1506 | 119  | 486 | 3.39535088 | 11.28135625 | 1.732307944  | Up   | 0         | 0         | AAEL000788-PA OS=Aedes aegypti GN=AAEL008788 PE=4 SV=1                                    |
| CCG017922.1 | 771  | 163  | 486 | 9.08439266 | 22.03595656 | 1.278397553  | Up   | 1.80E-13  | 5.25E-13  | AAEL015052-PA OS=Aedes aegypti GN=AAEL015052 PE=4 SV=1                                    |
| CCG024900.2 | 2808 | 1566 | 486 | 23.9638905 | 6.05047098  | -1.98574279  | Down | 3.25E-185 | 1.92E-184 | AAEL000200-PA OS=Aedes aegypti GN=AAEL000200 PE=4 SV=1                                    |
| CCG017095.1 | 942  | 2544 | 486 | 116.045653 | 18.03579884 | -2.685757248 | Down | 0         | 0         | AAEL003347-PA OS=Aedes aegypti GN=AAEL003347 PE=4 SV=1                                    |
| CCG026074.1 | 920  | 19   | 487 | 0.88741843 | 18.50508781 | 4.382163652  | Up   | 7.73E-10  | 1.60E-09  | AAEL006209-PA OS=Aedes aegypti GN=AAEL006209 PE=4 SV=1                                    |
| CCG011676.1 | 1071 | 62   | 487 | 2.48751031 | 15.89606049 | 2.675894856  | Up   | 0         | 0         | AAEL004355-PA OS=Aedes aegypti GN=AAEL004355 PE=4 SV=1                                    |

|             |       |      |     |            |             |              |      |           |           |                                                                            |
|-------------|-------|------|-----|------------|-------------|--------------|------|-----------|-----------|----------------------------------------------------------------------------|
| CCG019055.1 | 1938  | 107  | 487 | 2.37242601 | 8.784665009 | 1.888624179  | Up   | 0         | 0         | AAEL000811-PA (Fragment)<br>OS=Aedes aegypti<br>GN=GPRMTH7 PE=4 SV=2       |
| CCG000103.1 | 711   | 153  | 487 | 9.24665175 | 23.94469872 | 1.372703323  | Up   | 0         | 0         | AAEL011150-PA OS=Aedes<br>aegypti GN=AAEL011150 PE=4<br>SV=1               |
| CCG008018.1 | 489   | 8    | 488 | 0.70298134 | 34.88678745 | 5.633050541  | Up   | 2.19E-06  | 3.97E-06  | AAEL000235-PA OS=Aedes<br>aegypti GN=AAEL000235 PE=4<br>SV=1               |
| CCG016427.1 | 7506  | 87   | 488 | 0.49805048 | 2.272800302 | 2.190107046  | Up   | 0         | 0         | Rapsynoid OS=Culex<br>quinquefasciatus<br>GN=CpipJ_CPIJ003545 PE=4<br>SV=1 |
| CCG006558.2 | 1539  | 188  | 488 | 5.2490644  | 11.08488568 | 1.07846169   | Up   | 1.80E-13  | 5.24E-13  | AAEL009998-PA OS=Aedes<br>aegypti GN=AAEL009998 PE=4<br>SV=1               |
| CCG011166.1 | 2314  | 198  | 488 | 3.67675344 | 7.372359146 | 1.003693921  | Up   | 0         | 0         | AAEL002514-PA OS=Aedes<br>aegypti GN=AAEL002514 PE=4<br>SV=1               |
| CCG015431.1 | 49807 | 1095 | 488 | 0.94468367 | 0.342514889 | -1.463664613 | Down | 8.61E-85  | 4.41E-84  | AAEL003978-PA OS=Aedes<br>aegypti GN=AAEL003978 PE=4<br>SV=1               |
| CCG002365.1 | 891   | 55   | 489 | 2.65245275 | 19.1858556  | 2.854644145  | Up   | 0         | 0         | AAEL006068-PA OS=Aedes<br>aegypti GN=AAEL006068 PE=4<br>SV=1               |
| CCG018775.1 | 1478  | 64   | 489 | 1.8606651  | 11.56603338 | 2.636003859  | Up   | 0         | 0         | Ecdysteroid receptor OS=Aedes<br>albopictus GN=EcR PE=2 SV=1               |
| CCG022183.1 | 738   | 93   | 489 | 5.41488526 | 23.16341103 | 2.096845048  | Up   | 4.04E-14  | 1.38E-13  | Putative uncharacterized protein<br>OS=Amblyomma maculatum<br>PE=2 SV=1    |
| CCG008945.1 | 1068  | 150  | 489 | 6.03507509 | 16.00617729 | 1.407185168  | Up   | 0         | 0         | AAEL010469-PA OS=Aedes<br>aegypti GN=AAEL010469 PE=4<br>SV=1               |
| CCG019825.2 | 1779  | 1372 | 489 | 33.1391095 | 9.609104745 | -1.786060907 | Down | 9.06E-141 | 5.10E-140 | AAEL009658-PA OS=Aedes<br>aegypti GN=AAEL009658 PE=4<br>SV=1               |
| CCG019135.1 | 2139  | 12   | 490 | 0.24106443 | 8.008207395 | 5.053988642  | Up   | 1.30E-07  | 2.49E-07  | AAEL002320-PA OS=Aedes<br>aegypti GN=AAEL002320 PE=4<br>SV=1               |
| CCG020448.1 | 1956  | 33   | 490 | 0.72494951 | 8.757441523 | 3.594557023  | Up   | 1.31E-13  | 4.00E-13  | AAEL003572-PA OS=Aedes<br>aegypti GN=AAEL003572 PE=4<br>SV=1               |
| CCG010446.1 | 1930  | 59   | 490 | 1.31358256 | 8.875417419 | 2.756308093  | Up   | 0         | 0         | AAEL007472-PA OS=Aedes<br>aegypti GN=AAEL007472 PE=4<br>SV=1               |
| CCG022159.1 | 966   | 134  | 490 | 5.96060501 | 17.73245923 | 1.572861952  | Up   | 0         | 0         | AAEL013557-PA OS=Aedes<br>aegypti GN=AAEL013557 PE=4<br>SV=1               |

|             |      |     |     |            |             |              |      |          |          |                                                                                          |
|-------------|------|-----|-----|------------|-------------|--------------|------|----------|----------|------------------------------------------------------------------------------------------|
| CCG009735.1 | 987  | 142 | 490 | 6.18206921 | 17.35517287 | 1.489204023  | Up   | 2.62E-13 | 7.34E-13 | AAEL010173-PA OS=Aedes aegypti GN=AAEL010173 PE=4 SV=1                                   |
| CCG026283.1 | 1914 | 148 | 490 | 3.32263361 | 8.949611086 | 1.429497777  | Up   | 0        | 0        | AAEL013977-PA OS=Aedes aegypti GN=AAEL013977 PE=4 SV=1                                   |
| CCG024382.1 | 1545 | 881 | 490 | 24.502483  | 11.08709102 | -1.144047066 | Down | 3.31E-47 | 1.53E-46 | AAEL004496-PA OS=Aedes aegypti GN=AAEL004496 PE=4 SV=1                                   |
| CCG003111.1 | 477  | 9   | 491 | 0.81074971 | 35.98430586 | 5.471967417  | Up   | 1.09E-06 | 2.01E-06 | AAEL013145-PA OS=Aedes aegypti GN=AAEL013145 PE=4 SV=1                                   |
| CCG012796.1 | 1643 | 72  | 491 | 1.88303158 | 10.44705654 | 2.471967417  | Up   | 0        | 0        | AAEL011868-PA OS=Aedes aegypti GN=AAEL011868 PE=4 SV=1                                   |
| CCG018738.1 | 852  | 95  | 491 | 4.79122628 | 20.14614307 | 2.07203681   | Up   | 0        | 0        | AAEL010071-PA OS=Aedes aegypti GN=AAEL010071 PE=3 SV=1                                   |
| CCG027068.1 | 2304 | 107 | 491 | 1.99555625 | 7.449875823 | 1.900425432  | Up   | 0        | 0        | AAEL000116-PA OS=Aedes aegypti GN=AAEL000116 PE=4 SV=1                                   |
| CCG024291.1 | 4375 | 175 | 491 | 1.71878938 | 3.923317462 | 1.190681306  | Up   | 3.55E-13 | 9.58E-13 | AAEL013769-PA OS=Aedes aegypti GN=AAEL013769 PE=4 SV=1                                   |
| CCG015834.2 | 1668 | 194 | 491 | 4.99767897 | 10.29047596 | 1.041979576  | Up   | 5.97E-13 | 1.53E-12 | AAEL005820-PA OS=Aedes aegypti GN=AAEL005820 PE=4 SV=1                                   |
| CCG017973.1 | 1410 | 853 | 491 | 25.9951657 | 12.17341411 | -1.094509513 | Down | 1.05E-42 | 4.72E-42 | AAEL004119-PA OS=Aedes aegypti GN=AAEL004119 PE=4 SV=1                                   |
| CCG016367.1 | 1416 | 40  | 492 | 1.21383431 | 12.1465199  | 3.322899614  | Up   | 6.86E-14 | 2.24E-13 | Putative uncharacterized protein OS=Culex quinquefasciatus GN=CpipJ_CPIJ017880 PE=4 SV=1 |
| CCG005954.1 | 1298 | 65  | 492 | 2.15179719 | 13.25074898 | 2.622459896  | Up   | 0        | 0        | U3 small nucleolar ribonucleoprotein component OS=Aedes aegypti PE=2 SV=1                |
| CCG007785.1 | 546  | 120 | 492 | 9.44389772 | 31.50086478 | 1.737937114  | Up   | 0        | 0        | AAEL014722-PA OS=Aedes aegypti GN=AAEL014722 PE=4 SV=1                                   |
| CCG008916.1 | 1221 | 129 | 492 | 4.53979997 | 14.0863818  | 1.633600454  | Up   | 0        | 0        | AAEL012140-PA OS=Aedes aegypti GN=AAEL012140 PE=4 SV=1                                   |
| CCG027554.1 | 1897 | 162 | 492 | 3.66952926 | 9.066669569 | 1.304977706  | Up   | 0        | 0        | AAEL007472-PA OS=Aedes aegypti GN=AAEL007472 PE=4 SV=1                                   |
| CCG023043.1 | 7149 | 938 | 492 | 5.63793692 | 2.405857067 | -1.228616403 | Down | 5.30E-56 | 2.52E-55 | AAEL001803-PA (Fragment) OS=Aedes aegypti GN=AAEL001803 PE=4 SV=1                        |

|             |      |      |     |            |             |              |      |           |          |                                                                                          |
|-------------|------|------|-----|------------|-------------|--------------|------|-----------|----------|------------------------------------------------------------------------------------------|
| CCG012694.1 | 1262 | 1106 | 492 | 37.6581034 | 13.62874182 | -1.466307961 | Down | 7.47E-86  | 3.84E-85 | AAEL009560-PA OS=Aedes aegypti GN=AAEL009560 PE=4 SV=1                                   |
| CCG012547.1 | 843  | 19   | 493 | 0.96847563 | 20.44416423 | 4.399829527  | Up   | 7.73E-10  | 1.60E-09 | AAEL002806-PA OS=Aedes aegypti GN=AAEL002806 PE=4 SV=1                                   |
| CCG004796.1 | 1971 | 46   | 493 | 1.00284515 | 8.744003272 | 3.124195084  | Up   | 3.40E-14  | 1.18E-13 | AAEL007344-PA OS=Aedes aegypti GN=AAEL007344 PE=4 SV=1                                   |
| CCG006751.1 | 1110 | 50   | 493 | 1.93557363 | 15.52651392 | 3.00390085   | Up   | 0         | 0        | AAEL002267-PA OS=Aedes aegypti GN=AAEL002267 PE=4 SV=1                                   |
| CCG011568.1 | 900  | 85   | 493 | 4.05825271 | 19.14936717 | 2.238366104  | Up   | 0         | 0        | AAEL001086-PA OS=Aedes aegypti GN=AAEL001086 PE=4 SV=1                                   |
| CCG020987.1 | 1869 | 180  | 493 | 4.1383372  | 9.221204092 | 1.155903944  | Up   | 3.32E-13  | 9.06E-13 | AAEL006937-PA OS=Aedes aegypti GN=AAEL006937 PE=4 SV=1                                   |
| CCG024861.1 | 1162 | 37   | 494 | 1.36822735 | 14.86178031 | 3.44122707   | Up   | 5.17E-14  | 1.74E-13 | -                                                                                        |
| CCG006998.1 | 1357 | 52   | 494 | 1.64659263 | 12.72615234 | 2.950240717  | Up   | 0         | 0        | AAEL014961-PA OS=Aedes aegypti GN=AAEL014961 PE=4 SV=1                                   |
| CCG000039.1 | 1397 | 83   | 494 | 2.55296204 | 12.36176716 | 2.275641004  | Up   | 1.32E-13  | 4.01E-13 | AAEL006523-PA OS=Aedes aegypti GN=AAEL006523 PE=4 SV=1                                   |
| CCG002614.1 | 946  | 192  | 494 | 8.72113007 | 18.25516779 | 1.065717935  | Up   | 0         | 0        | AAEL000964-PA OS=Aedes aegypti GN=AAEL000964 PE=4 SV=1                                   |
| CCG008360.1 | 945  | 815  | 494 | 37.0585542 | 18.27448542 | -1.019975814 | Down | 1.37E-36  | 5.99E-36 | AAEL003989-PA OS=Aedes aegypti GN=AAEL003989 PE=4 SV=1                                   |
| CCG014947.2 | 1197 | 34   | 495 | 1.22052713 | 14.45643024 | 3.566135078  | Up   | 8.82E-14  | 2.79E-13 | AAEL003654-PA OS=Aedes aegypti GN=AAEL003654 PE=4 SV=1                                   |
| CCG004974.1 | 1370 | 68   | 495 | 2.13280435 | 12.63091022 | 2.566135078  | Up   | 0         | 0        | AAEL001644-PA OS=Aedes aegypti GN=AAEL001644 PE=4 SV=1                                   |
| CCG020282.1 | 456  | 80   | 495 | 7.53854993 | 37.94812939 | 2.331669824  | Up   | 0         | 0        | Putative uncharacterized protein OS=Culex quinquefasciatus GN=CpipJ_CPIJ000199 PE=4 SV=1 |
| CCG002755.1 | 1409 | 170  | 495 | 5.18442504 | 12.28129667 | 1.244206983  | Up   | 3.53E-13  | 9.52E-13 | AAEL005727-PA OS=Aedes aegypti GN=AAEL005727 PE=4 SV=1                                   |
| CCG021167.1 | 3636 | 1184 | 495 | 13.9923448 | 4.759171343 | -1.555855447 | Down | 4.18E-100 | 2.21E-99 | AAEL006355-PA OS=Aedes aegypti GN=SCRC1 PE=4 SV=2                                        |
| CCG017484.1 | 375  | 9    | 496 | 1.03127363 | 46.23814741 | 5.486584513  | Up   | 1.09E-06  | 2.01E-06 | Putative salivary protein 34k-1 OS=Aedes albopictus PE=2 SV=1                            |

|             |       |     |     |            |             |             |    |          |          |                                                                                          |
|-------------|-------|-----|-----|------------|-------------|-------------|----|----------|----------|------------------------------------------------------------------------------------------|
| CCG013375.1 | 1254  | 10  | 496 | 0.34266136 | 13.82719719 | 5.334581419 | Up | 5.43E-07 | 1.01E-06 | AAEL005326-PA OS=Aedes aegypti GN=AAEL005326 PE=4 SV=1                                   |
| CCG007831.1 | 885   | 25  | 496 | 1.21383431 | 19.59243534 | 4.012653324 | Up | 9.32E-12 | 2.08E-11 | AAEL006107-PA OS=Aedes aegypti GN=AAEL006107 PE=4 SV=1                                   |
| CCG000113.1 | 896   | 86  | 496 | 4.12432721 | 19.35190321 | 2.23024476  | Up | 0        | 0        | AAEL000046-PA OS=Aedes aegypti GN=AAEL000046 PE=4 SV=1                                   |
| CCG016555.1 | 2394  | 93  | 496 | 1.66925034 | 7.242817577 | 2.117350703 | Up | 4.04E-14 | 1.39E-13 | AAEL004896-PA OS=Aedes aegypti GN=AAEL004896 PE=4 SV=1                                   |
| CCG014201.1 | 4122  | 146 | 496 | 1.52197507 | 4.206527239 | 1.466684955 | Up | 9.33E-15 | 3.34E-14 | AAEL004332-PA OS=Aedes aegypti GN=AAEL004332 PE=4 SV=1                                   |
| CCG009495.1 | 1227  | 156 | 496 | 5.46314474 | 14.13146315 | 1.371107295 | Up | 1.42E-13 | 4.27E-13 | Light protein OS=Culex quinquefasciatus GN=CpipJ_CPIJ010406 PE=4 SV=1                    |
| CCG004949.1 | 1677  | 43  | 497 | 1.10178807 | 10.36032412 | 3.233150491 | Up | 8.46E-14 | 2.70E-13 | AAEL002048-PA OS=Aedes aegypti GN=AAEL002048 PE=3 SV=1                                   |
| CCG013695.1 | 2286  | 96  | 497 | 1.80450329 | 7.600290269 | 2.074452745 | Up | 0        | 0        | AAEL013594-PA OS=Aedes aegypti GN=AAEL013594 PE=4 SV=1                                   |
| CCG019989.1 | 1256  | 103 | 497 | 3.52379193 | 13.83301239 | 1.972914718 | Up | 0        | 0        | AAEL009269-PA OS=Aedes aegypti GN=AAEL009269 PE=4 SV=1                                   |
| CCG016285.1 | 953   | 172 | 497 | 7.75529313 | 18.2311265  | 1.233150491 | Up | 1.35E-13 | 4.10E-13 | AAEL000701-PA OS=Aedes aegypti GN=AAEL000701 PE=4 SV=1                                   |
| CCG000587.1 | 2148  | 43  | 498 | 0.86019487 | 8.104851877 | 3.236050381 | Up | 8.46E-14 | 2.70E-13 | AAEL006532-PA OS=Aedes aegypti GN=AAEL006532 PE=4 SV=1                                   |
| CCG018918.1 | 12363 | 46  | 498 | 0.15988092 | 1.408171304 | 3.13875318  | Up | 3.40E-14 | 1.18E-13 | Cytoplasmic dynein heavy chain OS=Culex quinquefasciatus GN=CpipJ_CPIJ005887 PE=4 SV=1   |
| CCG027738.1 | 485   | 80  | 498 | 7.08779128 | 35.89530275 | 2.340387041 | Up | 0        | 0        | -                                                                                        |
| CCG004580.1 | 1839  | 111 | 498 | 2.59360551 | 9.466678539 | 1.86789927  | Up | 0        | 0        | AAEL004708-PA (Fragment) OS=Aedes aegypti GN=AAEL004708 PE=4 SV=1                        |
| CCG000078.1 | 1242  | 111 | 498 | 3.84029029 | 14.01708682 | 1.86789927  | Up | 0        | 0        | AAEL011326-PA OS=Aedes aegypti GN=GPRMTH5 PE=4 SV=2                                      |
| CCG014210.1 | 516   | 144 | 498 | 11.9915538 | 33.738802   | 1.492390134 | Up | 7.53E-14 | 2.44E-13 | Putative uncharacterized protein OS=Culex quinquefasciatus GN=CpipJ_CPIJ010577 PE=4 SV=1 |

|             |      |      |     |            |             |              |      |           |           |                                                                           |
|-------------|------|------|-----|------------|-------------|--------------|------|-----------|-----------|---------------------------------------------------------------------------|
| CCG024843.1 | 917  | 195  | 498 | 9.13751172 | 18.98497474 | 1.054984822  | Up   | 2.26E-13  | 6.47E-13  | AAEL010002-PA OS=Aedes aegypti GN=AAEL010002 PE=4 SV=1                    |
| CCG020785.1 | 2943 | 958  | 498 | 13.9874298 | 5.915467833 | -1.24156671  | Down | 4.36E-58  | 2.09E-57  | -                                                                         |
| CCG005312.1 | 1902 | 3    | 499 | 0.06777561 | 9.171493223 | 7.080246708  | Up   | 5.28E-05  | 8.85E-05  | AAEL003088-PA OS=Aedes aegypti GN=AAEL003088 PE=4 SV=1                    |
| CCG010886.1 | 1627 | 107  | 499 | 2.82591371 | 10.72168415 | 1.923742223  | Up   | 0         | 0         | AAEL002298-PA OS=Aedes aegypti GN=AAEL002298 PE=4 SV=1                    |
| CCG017382.1 | 1073 | 118  | 499 | 4.72546942 | 16.2573906  | 1.78256616   | Up   | 0         | 0         | AAEL002790-PA OS=Aedes aegypti GN=AAEL002790 PE=4 SV=1                    |
| CCG007610.1 | 1317 | 163  | 499 | 5.31819798 | 13.24539112 | 1.316481055  | Up   | 1.80E-13  | 5.23E-13  | AAEL001978-PA (Fragment) OS=Aedes aegypti GN=AAEL001978 PE=4 SV=1         |
| CCG028343.1 | 1438 | 167  | 499 | 4.99022648 | 12.13086238 | 1.281504917  | Up   | 1.62E-13  | 4.78E-13  | AAEL009116-PA OS=Aedes aegypti GN=AAEL009116 PE=4 SV=1                    |
| CCG010931.1 | 1069 | 179  | 499 | 7.19511927 | 16.31822274 | 1.181393432  | Up   | 0         | 0         | -                                                                         |
| CCG014448.1 | 1962 | 1111 | 499 | 24.3319955 | 8.891019424 | -1.452433892 | Down | 4.98E-85  | 2.56E-84  | Voltage-gated calcium channel beta subunit OS=Anopheles gambiae PE=2 SV=1 |
| CCG008211.1 | 382  | 1550 | 499 | 174.353635 | 45.66539296 | -1.932843291 | Down | 7.44E-177 | 4.34E-176 | -                                                                         |
| CCG001904.1 | 1707 | 34   | 500 | 0.85587052 | 10.23968271 | 3.580634647  | Up   | 8.82E-14  | 2.80E-13  | AAEL012566-PA OS=Aedes aegypti GN=AAEL012566 PE=4 SV=1                    |
| CCG012151.1 | 1164 | 43   | 500 | 1.58736992 | 15.01644191 | 3.241832734  | Up   | 8.46E-14  | 2.70E-13  | AAEL009518-PA OS=Aedes aegypti GN=AAEL009518 PE=4 SV=1                    |
| CCG012582.1 | 1614 | 46   | 500 | 1.22466406 | 10.8297016  | 3.144535532  | Up   | 3.40E-14  | 1.18E-13  | AAEL003657-PA OS=Aedes aegypti GN=AAEL003657 PE=4 SV=1                    |
| CCG021938.1 | 1173 | 87   | 500 | 3.18701356 | 14.90122625 | 2.225153993  | Up   | 0         | 0         | AAEL002846-PA OS=Aedes aegypti GN=AAEL002846 PE=4 SV=1                    |
| CCG020091.1 | 1558 | 189  | 500 | 5.21263148 | 11.21895917 | 1.105855064  | Up   | 2.34E-13  | 6.64E-13  | AAEL001385-PA OS=Aedes aegypti GN=AAEL001385 PE=4 SV=1                    |
| CCG019821.1 | 1278 | 81   | 501 | 2.72343388 | 13.70430099 | 2.331129994  | Up   | 4.46E-14  | 1.51E-13  | Uncharacterized protein OS=Anopheles darlingi GN=AND_05553 PE=4 SV=1      |
| CCG011299.1 | 1554 | 93   | 501 | 2.57154782 | 11.27033247 | 2.131821186  | Up   | 4.04E-14  | 1.39E-13  | AAEL010935-PA OS=Aedes aegypti GN=AAEL010935 PE=4 SV=1                    |

|             |      |      |     |            |             |              |      |          |          |                                                                                 |
|-------------|------|------|-----|------------|-------------|--------------|------|----------|----------|---------------------------------------------------------------------------------|
| CCG008654.1 | 969  | 127  | 501 | 5.63174024 | 18.07440316 | 1.68229531   | Up   | 1.57E-13 | 4.67E-13 | AAEL006039-PA OS=Aedes aegypti GN=AAEL006039 PE=3 SV=1                          |
| CCG010325.1 | 1413 | 4    | 502 | 0.12164115 | 12.41971333 | 6.673856758  | Up   | 2.95E-05 | 5.04E-05 | AAEL014380-PA OS=Aedes aegypti GN=AAEL014380 PE=4 SV=1                          |
| CCG005932.1 | 2385 | 156  | 502 | 2.81059899 | 7.358094314 | 1.388454539  | Up   | 1.42E-13 | 4.26E-13 | AAEL007215-PA OS=Aedes aegypti GN=AAEL007215 PE=4 SV=1                          |
| CCG003003.1 | 402  | 923  | 502 | 98.6593658 | 43.65436552 | -1.17633008  | Down | 1.48E-51 | 6.96E-51 | AAEL008672-PA OS=Aedes aegypti GN=AAEL008672 PE=3 SV=1                          |
| CCG025146.1 | 1979 | 111  | 503 | 2.4101266  | 8.885302282 | 1.882311927  | Up   | 0        | 0        | AAEL004853-PA OS=Aedes aegypti GN=AAEL004853 PE=3 SV=1                          |
| CCG005369.1 | 780  | 138  | 503 | 7.60233766 | 22.54360669 | 1.568203337  | Up   | 1.49E-13 | 4.45E-13 | AAEL009944-PA OS=Aedes aegypti GN=AAEL009944 PE=4 SV=1                          |
| CCG009789.1 | 1134 | 39   | 504 | 1.47779511 | 15.5370119  | 3.394190908  | Up   | 7.33E-14 | 2.37E-13 | AAEL008112-PA OS=Aedes aegypti GN=AAEL008112 PE=4 SV=1                          |
| CCG010951.1 | 453  | 98   | 504 | 9.29588078 | 38.89397681 | 2.064883283  | Up   | 0        | 0        | AAEL002550-PA OS=Aedes aegypti GN=AAEL002550 PE=4 SV=1                          |
| CCG008133.1 | 916  | 1144 | 504 | 53.6652581 | 19.23468504 | -1.480278209 | Down | 5.46E-90 | 2.84E-89 | -                                                                               |
| CCG010908.1 | 710  | 3    | 505 | 0.18156226 | 24.86468982 | 7.097490281  | Up   | 5.28E-05 | 8.85E-05 | histone H1 OS=Culex quinquefasciatus GN=CpipJ_CPIJ012377 PE=3 SV=1              |
| CCG010219.1 | 1416 | 68   | 505 | 2.06351833 | 12.46746453 | 2.59498994   | Up   | 0        | 0        | AAEL010332-PA OS=Aedes aegypti GN=AAEL010332 PE=4 SV=1                          |
| CCG023361.1 | 999  | 123  | 505 | 5.29056793 | 17.67160137 | 1.739938276  | Up   | 0        | 0        | AAEL001688-PA OS=Aedes aegypti GN=AAEL001688 PE=4 SV=1                          |
| CCG016836.2 | 1443 | 167  | 505 | 4.97293533 | 12.23418556 | 1.298748489  | Up   | 1.62E-13 | 4.77E-13 | AAEL001859-PA OS=Aedes aegypti GN=AAEL001859 PE=4 SV=1                          |
| CCG022292.1 | 918  | 177  | 505 | 8.28501419 | 19.23086032 | 1.214847231  | Up   | 0        | 0        | AAEL009145-PA (Fragment) OS=Aedes aegypti GN=AAEL009145 PE=4 SV=1               |
| CCG021977.1 | 285  | 180  | 505 | 27.1387798 | 61.94361323 | 1.190599685  | Up   | 3.32E-13 | 9.06E-13 | AAEL008928-PA OS=Aedes aegypti GN=AAEL008928 PE=3 SV=1                          |
| CCG028416.1 | 1220 | 1111 | 505 | 39.1306354 | 14.47043424 | -1.43519032  | Down | 1.55E-83 | 7.94E-83 | NADP+-dependent farnesol dehydrogenase 1 OS=Aedes aegypti GN=FOHSDR-1 PE=2 SV=1 |



|             |      |      |     |            |             |              |      |           |           |                                                                                           |
|-------------|------|------|-----|------------|-------------|--------------|------|-----------|-----------|-------------------------------------------------------------------------------------------|
| CCG013485.1 | 1884 | 1637 | 505 | 37.3362291 | 9.370451046 | -1.994385825 | Down | 1.23E-194 | 7.29E-194 | AAEL013821-PA OS=Aedes aegypti GN=AAEL013821 PE=4 SV=1                                    |
| CCG018683.1 | 1260 | 40   | 506 | 1.36411856 | 14.03880004 | 3.363378684  | Up   | 6.86E-14  | 2.25E-13  | AAEL004837-PA OS=Aedes aegypti GN=AAEL004837 PE=4 SV=1                                    |
| CCG012898.1 | 1359 | 61   | 506 | 1.92873717 | 13.01610599 | 2.754569441  | Up   | 1.75E-14  | 6.17E-14  | AAEL006220-PA OS=Aedes aegypti GN=AAEL006220 PE=4 SV=1                                    |
| CCG024456.1 | 821  | 80   | 506 | 4.18706306 | 21.54553964 | 2.363378684  | Up   | 0         | 0         | Exosomal 3'-5' exoribonuclease complex subunit ski4 (Fragment) OS=Aedes aegypti PE=2 SV=1 |
| CCG017591.1 | 750  | 117  | 506 | 6.7032786  | 23.58518406 | 1.814942059  | Up   | 9.44E-14  | 2.97E-13  | AAEL012195-PA OS=Aedes aegypti GN=AAEL012195 PE=4 SV=1                                    |
| CCG016255.1 | 417  | 122  | 506 | 12.5714811 | 42.4193958  | 1.754569441  | Up   | 8.04E-14  | 2.58E-13  | AAEL011959-PA OS=Aedes aegypti GN=AAEL011959 PE=4 SV=1                                    |
| CCG020985.1 | 363  | 174  | 506 | 20.5970629 | 48.72971914 | 1.242363283  | Up   | 1.78E-13  | 5.20E-13  | AAEL001341-PA OS=Aedes aegypti GN=AAEL001341 PE=4 SV=1                                    |
| CCG011451.2 | 1672 | 192  | 506 | 4.93432359 | 10.5794785  | 1.100344278  | Up   | 0         | 0         | AAEL012479-PA OS=Aedes aegypti GN=AAEL012479 PE=4 SV=1                                    |
| CCG004582.2 | 1782 | 878  | 506 | 21.1713956 | 9.926424269 | -1.092770351 | Down | 8.47E-44  | 3.84E-43  | Uncharacterized protein OS=Anopheles darlingi GN=AND_22059 PE=4 SV=1                      |
| CCG010506.1 | 1344 | 63   | 507 | 2.01420631 | 13.18738566 | 2.710875217  | Up   | 0         | 0         | AAEL010138-PA OS=Aedes aegypti GN=AAEL010138 PE=4 SV=1                                    |
| CCG017936.2 | 720  | 93   | 507 | 5.55025739 | 24.61645323 | 2.14899633   | Up   | 4.04E-14  | 1.38E-13  | -                                                                                         |
| CCG016974.1 | 639  | 163  | 507 | 10.9609808 | 27.73684871 | 1.339426987  | Up   | 1.80E-13  | 5.24E-13  | AAEL011217-PA OS=Aedes aegypti GN=AAEL011217 PE=4 SV=1                                    |
| CCG010621.1 | 480  | 182  | 507 | 16.292691  | 36.92467984 | 1.180360501  | Up   | 0         | 0         | AAEL001959-PA OS=Aedes aegypti GN=AAEL001959 PE=4 SV=1                                    |
| CCG027818.1 | 1560 | 188  | 507 | 5.17840391 | 11.36143995 | 1.133566289  | Up   | 1.80E-13  | 5.24E-13  | AAEL008100-PA OS=Aedes aegypti GN=AAEL008100 PE=4 SV=1                                    |
| CCG020793.1 | 730  | 1038 | 507 | 61.0994309 | 24.27924154 | -1.331435588 | Down | 7.47E-70  | 3.70E-69  | AAEL013262-PA OS=Aedes aegypti GN=AAEL013262 PE=4 SV=1                                    |
| CCG013176.1 | 830  | 1726 | 507 | 89.3563397 | 21.35403172 | -2.065061608 | Down | 1.03E-214 | 6.21E-214 | AAEL000657-PA OS=Aedes aegypti GN=AAEL000657 PE=4 SV=1                                    |
| CCG019995.1 | 1413 | 100  | 508 | 3.04102863 | 12.56815612 | 2.047141701  | Up   | 0         | 0         | AAEL009259-PA OS=Aedes aegypti GN=AAEL009259 PE=4 SV=1                                    |

|             |      |      |     |            |             |              |      |           |           |                                                                        |
|-------------|------|------|-----|------------|-------------|--------------|------|-----------|-----------|------------------------------------------------------------------------|
| CCG009137.1 | 2251 | 127  | 508 | 2.42432532 | 7.889295691 | 1.702313204  | Up   | 1.57E-13  | 4.66E-13  | AAEL005631-PA OS=Aedes aegypti GN=AAEL005631 PE=4 SV=1                 |
| CCG018625.1 | 2175 | 143  | 508 | 2.82513657 | 8.164967632 | 1.531126554  | Up   | 0         | 0         | AAEL002016-PA OS=Aedes aegypti GN=AAEL002016 PE=4 SV=1                 |
| CCG018945.1 | 1844 | 2398 | 508 | 55.879297  | 9.630588178 | -2.536618053 | Down | 0         | 0         | Cytokrome P450 OS=Aedes albopictus GN=CYP6Y7 PE=2 SV=1                 |
| CCG010482.1 | 786  | 0    | 509 | 0.001      | 22.63837516 | 14.46648279  | Up   | 4.44E-16  | 1.65E-15  | AAEL013288-PA OS=Aedes aegypti GN=AAEL013288 PE=4 SV=1                 |
| CCG024402.1 | 1734 | 43   | 509 | 1.06557012 | 10.26168563 | 3.267570295  | Up   | 8.46E-14  | 2.70E-13  | AAEL002751-PA OS=Aedes aegypti GN=AAEL002751 PE=4 SV=1                 |
| CCG016219.1 | 551  | 75   | 509 | 5.84887495 | 32.29358054 | 2.465016359  | Up   | 0         | 0         | AAEL010121-PA OS=Aedes aegypti GN=AAEL010121 PE=4 SV=1                 |
| CCG023251.1 | 1545 | 99   | 509 | 2.75340047 | 11.51699863 | 2.06447843   | Up   | 0         | 0         | AAEL010835-PA (Fragment) OS=Aedes aegypti GN=AAEL010835 PE=4 SV=1      |
| CCG015296.1 | 930  | 105  | 509 | 4.85142165 | 19.13307836 | 1.979589532  | Up   | 0         | 0         | AAEL004797-PA OS=Aedes aegypti GN=AAEL004797 PE=4 SV=1                 |
| CCG028068.1 | 1233 | 133  | 509 | 4.63501598 | 14.43127565 | 1.638552614  | Up   | 9.90E-14  | 3.11E-13  | AAEL001740-PA OS=Aedes aegypti GN=AAEL001740 PE=4 SV=1                 |
| CCG003900.1 | 2046 | 137  | 509 | 2.87725007 | 8.696853801 | 1.595802967  | Up   | 2.90E-13  | 8.03E-13  | AAEL013092-PA OS=Aedes aegypti GN=AAEL013092 PE=4 SV=1                 |
| CCG024123.2 | 1515 | 977  | 509 | 27.7105153 | 11.745058   | -1.238379702 | Down | 5.71E-59  | 2.74E-58  | Cytokrome P450 OS=Culex quinquefasciatus GN=CpipJ_CPIJ005957 PE=3 SV=1 |
| CCG015550.1 | 1123 | 1581 | 509 | 60.4943459 | 15.84484673 | -1.932786602 | Down | 2.41E-180 | 1.41E-179 | AAEL003019-PA OS=Aedes aegypti GN=AAEL003019 PE=4 SV=1                 |
| CCG006606.1 | 1653 | 67   | 510 | 1.74166498 | 10.78567523 | 2.63057745   | Up   | 0         | 0         | AAEL001175-PA OS=Aedes aegypti GN=AAEL001175 PE=4 SV=1                 |
| CCG001963.1 | 528  | 83   | 510 | 6.75471207 | 33.76651734 | 2.321627209  | Up   | 1.32E-13  | 4.02E-13  | AAEL006781-PA OS=Aedes aegypti GN=AAEL006781 PE=4 SV=1                 |
| CCG021795.1 | 849  | 95   | 510 | 4.80815641 | 20.99967156 | 2.126811032  | Up   | 0         | 0         | AAEL005939-PA OS=Aedes aegypti GN=AAEL005939 PE=4 SV=1                 |
| CCG026106.1 | 1676 | 97   | 510 | 2.48691185 | 10.63766179 | 2.096753798  | Up   | 3.62E-14  | 1.25E-13  | AAEL007649-PA OS=Aedes aegypti GN=AAEL007649 PE=4 SV=1                 |

|             |      |      |     |             |             |              |      |           |           |                                                                                          |
|-------------|------|------|-----|-------------|-------------|--------------|------|-----------|-----------|------------------------------------------------------------------------------------------|
| CCG025632.1 | 5337 | 1024 | 510 | 8.24452094  | 3.340588562 | -1.303333359 | Down | 9.68E-67  | 4.75E-66  | AAEL006809-PA OS=Aedes aegypti GN=AAEL006809 PE=4 SV=1                                   |
| CCG004225.1 | 1383 | 54   | 511 | 1.677777706 | 12.91661564 | 2.944605183  | Up   | 0         | 0         | Serine/threonine-protein kinase RIO1 OS=Aedes aegypti GN=AAEL011857 PE=3 SV=1            |
| CCG005538.1 | 568  | 72   | 511 | 5.44686777  | 31.45013984 | 2.529567683  | Up   | 0         | 0         | Odorant-binding protein 2 OS=Aedes aegypti PE=2 SV=1                                     |
| CCG015160.1 | 2555 | 169  | 511 | 2.84222511  | 6.991655354 | 1.298613248  | Up   | 0         | 0         | AAEL005472-PA OS=Aedes aegypti GN=AAEL005472 PE=4 SV=1                                   |
| CCG015250.1 | 2053 | 20   | 512 | 0.41860433  | 8.718284319 | 4.380385109  | Up   | 3.69E-10  | 7.72E-10  | AAEL003542-PA OS=Aedes aegypti GN=AAEL003542 PE=4 SV=1                                   |
| CCG013648.1 | 1341 | 48   | 512 | 1.53806656  | 13.3472317  | 3.117350703  | Up   | 5.35E-14  | 1.79E-13  | AAEL009971-PA OS=Aedes aegypti GN=AAEL009971 PE=4 SV=1                                   |
| CCG009494.1 | 1719 | 71   | 512 | 1.77478252  | 10.41223834 | 2.552566084  | Up   | 0         | 0         | AAEL001152-PA OS=Aedes aegypti GN=AAEL001152 PE=4 SV=1                                   |
| CCG010830.1 | 665  | 109  | 512 | 7.04315951  | 26.91524467 | 1.934128879  | Up   | 0         | 0         | AAEL001264-PA OS=Aedes aegypti GN=AAEL001264 PE=4 SV=1                                   |
| CCG019633.1 | 870  | 120  | 512 | 5.92685995  | 20.57314679 | 1.795422608  | Up   | 0         | 0         | AAEL014038-PA OS=Aedes aegypti GN=AAEL014038 PE=3 SV=1                                   |
| CCG027023.1 | 666  | 129  | 512 | 8.32296661  | 26.87483139 | 1.691085948  | Up   | 0         | 0         | AAEL013320-PA OS=Aedes aegypti GN=AAEL013320 PE=4 SV=1                                   |
| CCG021792.1 | 1362 | 130  | 512 | 4.10136968  | 13.14143738 | 1.679945391  | Up   | 0         | 0         | Putative uncharacterized protein OS=Culex quinquefasciatus GN=CpipJ_CPIJ000820 PE=4 SV=1 |
| CCG021571.1 | 2481 | 1650 | 512 | 28.5772117  | 7.214283639 | -1.985937105 | Down | 4.57E-195 | 2.72E-194 | AAEL004074-PA OS=Aedes aegypti GN=AAEL004074 PE=4 SV=1                                   |
| CCG002690.1 | 1260 | 7    | 513 | 0.23872075  | 14.23301269 | 5.897773297  | Up   | 4.31E-06  | 7.71E-06  | AAEL002556-PA (Fragment) OS=Aedes aegypti GN=AAEL002556 PE=4 SV=1                        |
| CCG025158.1 | 1743 | 19   | 513 | 0.46840216  | 10.28892483 | 4.457200706  | Up   | 7.73E-10  | 1.60E-09  | AAEL011085-PA OS=Aedes aegypti GN=AAEL011085 PE=4 SV=1                                   |
| CCG003093.1 | 990  | 39   | 513 | 1.69274712  | 18.11474342 | 3.419726001  | Up   | 7.33E-14  | 2.38E-13  | AAEL000157-PA OS=Aedes aegypti GN=AAEL000157 PE=4 SV=1                                   |

|             |      |      |     |            |             |              |      |           |           |                                                                                   |
|-------------|------|------|-----|------------|-------------|--------------|------|-----------|-----------|-----------------------------------------------------------------------------------|
| CCG020673.1 | 1302 | 57   | 513 | 1.8811635  | 13.77388324 | 2.872238205  | Up   | 0         | 0         | Zinc finger protein OS=Culex quinquefasciatus<br>GN=CpipJ_CPIJ001406 PE=4<br>SV=1 |
| CCG017941.1 | 855  | 71   | 513 | 3.56824697 | 20.97496606 | 2.5553811    | Up   | 0         | 0         | AAEL005424-PA OS=Aedes aegypti GN=AAEL005424 PE=4<br>SV=1                         |
| CCG024388.1 | 1734 | 99   | 513 | 2.45328935 | 10.34232756 | 2.075771599  | Up   | 0         | 0         | AAEL002751-PA OS=Aedes aegypti GN=AAEL002751 PE=4<br>SV=1                         |
| CCG011086.1 | 363  | 120  | 513 | 14.2048709 | 49.40384569 | 1.798237624  | Up   | 0         | 0         | AAEL013060-PA OS=Aedes aegypti GN=AAEL013060 PE=4<br>SV=1                         |
| CCG007317.1 | 738  | 160  | 513 | 9.31593162 | 24.30026556 | 1.383200125  | Up   | 4.24E-14  | 1.44E-13  | AAEL009615-PA OS=Aedes aegypti GN=GPROP8 PE=2 SV=1                                |
| CCG021774.1 | 1374 | 38   | 514 | 1.1883915  | 13.07755041 | 3.46001024   | Up   | 4.26E-14  | 1.45E-13  | AAEL011655-PA OS=Aedes aegypti GN=AAEL011655 PE=3<br>SV=1                         |
| CCG017810.1 | 1851 | 112  | 514 | 2.60000555 | 9.707484744 | 1.900582831  | Up   | 0         | 0         | AAEL011465-PA OS=Aedes aegypti GN=AAEL011465 PE=4<br>SV=1                         |
| CCG028137.1 | 1663 | 118  | 514 | 3.04896493 | 10.80490334 | 1.825294704  | Up   | 0         | 0         | AAEL012146-PA (Fragment)<br>OS=Aedes aegypti<br>GN=AAEL012146 PE=4 SV=1           |
| CCG026922.1 | 558  | 175  | 514 | 13.4761712 | 32.20171015 | 1.256726641  | Up   | 3.55E-13  | 9.58E-13  | AAEL009085-PA OS=Aedes aegypti GN=AAEL009085 PE=4<br>SV=1                         |
| CCG006273.1 | 2284 | 201  | 514 | 3.78148715 | 7.867142846 | 1.056886062  | Up   | 0         | 0         | AAEL011074-PA OS=Aedes aegypti GN=AAEL011074 PE=4<br>SV=1                         |
| CCG012308.1 | 1404 | 203  | 514 | 6.21286049 | 12.79811557 | 1.042601836  | Up   | 9.28E-14  | 2.93E-13  | AAEL010223-PA OS=Aedes aegypti GN=AAEL010223 PE=4<br>SV=1                         |
| CCG010872.1 | 2364 | 1776 | 514 | 32.2818311 | 7.600911278 | -2.086478113 | Down | 7.41E-224 | 4.49E-223 | AAEL012094-PA OS=Aedes aegypti GN=AAEL012094 PE=4<br>SV=1                         |
| CCG019339.1 | 1851 | 1936 | 514 | 44.9429531 | 9.707484744 | -2.210925484 | Down | 1.38E-262 | 8.53E-262 | AGAP001797-PA OS=Anopheles gambiae GN=AgaP_AGAP001797<br>PE=3 SV=4                |
| CCG006896.1 | 1464 | 2891 | 514 | 84.8534855 | 12.27360264 | -2.78941514  | Down | 0         | 0         | AAEL011981-PA OS=Aedes aegypti GN=AAEL011981 PE=3<br>SV=1                         |
| CCG021728.1 | 2217 | 89   | 515 | 1.7249916  | 8.120664203 | 2.235008395  | Up   | 0         | 0         | AAEL012059-PA OS=Aedes aegypti GN=AAEL012059 PE=4<br>SV=1                         |
| CCG028465.1 | 2151 | 102  | 515 | 2.03761643 | 8.369833816 | 2.038316484  | Up   | 0         | 0         | AAEL007067-PA OS=Aedes aegypti GN=AAEL007067 PE=4<br>SV=1                         |

|             |      |      |     |            |             |              |      |           |           |                                                                                          |
|-------------|------|------|-----|------------|-------------|--------------|------|-----------|-----------|------------------------------------------------------------------------------------------|
| CCG021365.1 | 807  | 121  | 515 | 6.44279788 | 22.3091853  | 1.791878589  | Up   | 0         | 0         | AGAP005928-PA OS=Anopheles gambiae GN=AGAP005928 PE=4 SV=1                               |
| CCG011335.1 | 1611 | 1413 | 515 | 37.6885382 | 11.1753647  | -1.753803924 | Down | 2.73E-141 | 1.54E-140 | AAEL010294-PA OS=Aedes aegypti GN=AAEL010294 PE=4 SV=1                                   |
| CCG013128.1 | 615  | 2411 | 515 | 168.455334 | 29.27400413 | -2.52467411  | Down | 0         | 0         | AAEL006439-PA OS=Aedes aegypti GN=AAEL006439 PE=4 SV=1                                   |
| CCG006253.1 | 318  | 92   | 516 | 12.4314955 | 56.72475099 | 2.189978503  | Up   | 1.44E-14  | 5.11E-14  | AAEL010581-PA OS=Aedes aegypti GN=AAEL010581 PE=4 SV=1                                   |
| CCG013389.1 | 1624 | 162  | 516 | 4.28638978 | 11.10743277 | 1.373690456  | Up   | 0         | 0         | AAEL002489 OS=Aedes aegypti GN=AAEL002489 PE=2 SV=1                                      |
| CCG026123.1 | 402  | 0    | 517 | 0.001      | 44.95877883 | 15.45631523  | Up   | 4.44E-16  | 1.63E-15  | AAEL013734-PA OS=Aedes aegypti GN=AAEL013734 PE=4 SV=1                                   |
| CCG014017.1 | 1242 | 103  | 517 | 3.56351261 | 14.55187527 | 2.029833147  | Up   | 0         | 0         | AAEL004420-PA OS=Aedes aegypti GN=AAEL004420 PE=4 SV=1                                   |
| CCG015503.1 | 1221 | 114  | 517 | 4.01191625 | 14.80215323 | 1.88344366   | Up   | 8.48E-14  | 2.70E-13  | AAEL012838-PA OS=Aedes aegypti GN=AAEL012838 PE=4 SV=1                                   |
| CCG024790.1 | 1782 | 120  | 517 | 2.89358482 | 10.1422161  | 1.809443079  | Up   | 0         | 0         | AAEL001711-PA OS=Aedes aegypti GN=AAEL001711 PE=3 SV=1                                   |
| CCG019667.1 | 1280 | 140  | 517 | 4.69981472 | 14.11986648 | 1.587050657  | Up   | 0         | 0         | AAEL000724-PA OS=Aedes aegypti GN=AAEL000724 PE=4 SV=1                                   |
| CCG013644.1 | 507  | 159  | 517 | 13.4757156 | 35.64778913 | 1.403450719  | Up   | 5.53E-14  | 1.84E-13  | AAEL009957-PA OS=Aedes aegypti GN=AAEL009957 PE=4 SV=1                                   |
| CCG011161.1 | 1068 | 197  | 517 | 7.92606528 | 16.92268642 | 1.094281855  | Up   | 0         | 0         | AAEL006611-PA OS=Aedes aegypti GN=AAEL006611 PE=4 SV=1                                   |
| CCG022509.1 | 879  | 31   | 518 | 1.51542864 | 20.60112329 | 3.764925181  | Up   | 2.40E-13  | 6.76E-13  | AAEL013852-PA OS=Aedes aegypti GN=AAEL013852 PE=4 SV=1                                   |
| CCG013853.1 | 1817 | 32   | 518 | 0.75675922 | 9.966091012 | 3.719121492  | Up   | 1.77E-13  | 5.17E-13  | Putative uncharacterized protein OS=Culex quinquefasciatus GN=CpipJ_CPIJ008808 PE=4 SV=1 |
| CCG004804.1 | 2472 | 63   | 518 | 1.09510246 | 7.325399421 | 2.741841568  | Up   | 0         | 0         | AAEL007237-PA OS=Aedes aegypti GN=AAEL007237 PE=4 SV=1                                   |
| CCG000122.1 | 3033 | 76   | 518 | 1.07672266 | 5.970454127 | 2.471193978  | Up   | 0         | 0         | histone transcription regulator OS=Culex quinquefasciatus GN=CpipJ_CPIJ002429 PE=4 SV=1  |

|             |       |      |     |            |             |              |      |           |           |                                                                         |
|-------------|-------|------|-----|------------|-------------|--------------|------|-----------|-----------|-------------------------------------------------------------------------|
| CCG024507.1 | 1758  | 148  | 518 | 3.61747481 | 10.30056164 | 1.509668126  | Up   | 0         | 0         | AAEL012329-PA (Fragment)<br>OS=Aedes aegypti<br>GN=AAEL012329 PE=3 SV=1 |
| CCG006576.1 | 1668  | 60   | 519 | 1.54567391 | 10.87730554 | 2.815013337  | Up   | 0         | 0         | AAEL012469-PA OS=Aedes<br>aegypti GN=AAEL012469 PE=4<br>SV=1            |
| CCG022463.1 | 749   | 88   | 519 | 5.04851355 | 24.22342543 | 2.262472314  | Up   | 2.93E-14  | 1.02E-13  | AAEL008891-PA OS=Aedes<br>aegypti GN=AAEL008891 PE=4<br>SV=1            |
| CCG026617.1 | 1361  | 92   | 519 | 2.9046404  | 13.3308932  | 2.198341976  | Up   | 1.44E-14  | 5.11E-14  | AAEL004740-PA OS=Aedes<br>aegypti GN=AAEL004740 PE=4<br>SV=1            |
| CCG000639.1 | 732   | 96   | 519 | 5.63537503 | 24.78599132 | 2.136941431  | Up   | 0         | 0         | AGAP003872-PA OS=Anopheles<br>gambiae GN=AgaP_AGAP003872<br>PE=4 SV=4   |
| CCG012142.1 | 2688  | 83   | 520 | 1.32681844 | 6.762761876 | 2.349641585  | Up   | 1.32E-13  | 4.01E-13  | AAEL011963-PA OS=Aedes<br>aegypti GN=AAEL011963 PE=4<br>SV=1            |
| CCG004227.1 | 1531  | 104  | 520 | 2.91891078 | 11.87348395 | 2.024241299  | Up   | 0         | 0         | AAEL015347-PA OS=Aedes<br>aegypti GN=AAEL015347 PE=4<br>SV=1            |
| CCG002638.1 | 1251  | 112  | 520 | 3.84701061 | 14.53101832 | 1.917326095  | Up   | 0         | 0         | AAEL014440-PA OS=Aedes<br>aegypti GN=AAEL014440 PE=4<br>SV=1            |
| CCG023699.1 | 2965  | 131  | 520 | 1.89849418 | 6.130962537 | 1.691258015  | Up   | 1.26E-13  | 3.87E-13  | AAEL003447-PA OS=Aedes<br>aegypti GN=AAEL003447 PE=4<br>SV=1            |
| CCG016645.1 | 1260  | 163  | 520 | 5.55878313 | 14.42722533 | 1.375952863  | Up   | 1.80E-13  | 5.25E-13  | AAEL005729-PA OS=Aedes<br>aegypti GN=HOT_AEDAE PE=4<br>SV=1             |
| CCG011657.1 | 1008  | 210  | 520 | 8.95202804 | 18.03403167 | 1.010435499  | Up   | 0         | 0         | AAEL000394-PA OS=Aedes<br>aegypti GN=AAEL000394 PE=4<br>SV=1            |
| CCG014125.1 | 459   | 996  | 520 | 93.2415156 | 39.60414798 | -1.235320915 | Down | 7.46E-60  | 3.59E-59  | AAEL008671-PA OS=Aedes<br>aegypti GN=AAEL008671 PE=4<br>SV=1            |
| CCG009201.1 | 930   | 69   | 521 | 3.18807708 | 19.5841529  | 2.618928309  | Up   | 0         | 0         | AAEL011851-PA OS=Aedes<br>aegypti GN=AAEL011851 PE=4<br>SV=1            |
| CCG000912.1 | 1282  | 84   | 521 | 2.81548963 | 14.20691279 | 2.335135343  | Up   | 0         | 0         | AAEL013048-PA OS=Aedes<br>aegypti GN=AAEL013048 PE=4<br>SV=1            |
| CCG015696.1 | 1605  | 1630 | 521 | 43.6390451 | 11.34782691 | -1.943203483 | Down | 3.23E-187 | 1.91E-186 | AAEL014318-PA OS=Aedes<br>aegypti GN=AAEL014318 PE=4<br>SV=1            |
| CCG022692.1 | 16935 | 2972 | 521 | 7.54095372 | 1.075480496 | -2.809765634 | Down | 0         | 0         | AAEL005244-PA OS=Aedes<br>aegypti GN=AAEL005244 PE=4<br>SV=1            |

|             |      |      |     |            |             |              |      |           |           |                                                                                                                     |
|-------------|------|------|-----|------------|-------------|--------------|------|-----------|-----------|---------------------------------------------------------------------------------------------------------------------|
| CCG012955.1 | 933  | 8720 | 521 | 401.603522 | 19.52118135 | -4.362659654 | Down | 0         | 0         | AAEL006586-PA (Fragment)<br>OS=Aedes aegypti<br>GN=AAEL006586 PE=3 SV=1                                             |
| CCG012842.1 | 702  | 47   | 522 | 2.87689106 | 25.99461606 | 3.175630349  | Up   | 0         | 0         | AAEL013274-PA OS=Aedes<br>aegypti GN=AAEL013274 PE=3<br>SV=1                                                        |
| CCG027396.1 | 1549 | 52   | 522 | 1.44249593 | 11.78064588 | 3.029779482  | Up   | 0         | 0         | AAEL000839-PA OS=Aedes<br>aegypti GN=AAEL000839 PE=4<br>SV=1                                                        |
| CCG000863.1 | 654  | 110  | 522 | 7.22732539 | 27.90247779 | 1.948859487  | Up   | 0         | 0         | -                                                                                                                   |
| CCG016794.1 | 2251 | 181  | 522 | 3.45514081 | 8.106717226 | 1.230373313  | Up   | 1.53E-13  | 4.55E-13  | AAEL011370-PA OS=Aedes<br>aegypti GN=AAEL011370 PE=4<br>SV=1                                                        |
| CCG001649.1 | 402  | 1813 | 523 | 193.791365 | 45.48054416 | -2.09118287  | Down | 3.81E-229 | 2.32E-228 | Cytochrome b-c1 complex subunit<br>7 OS=Aedes aegypti<br>GN=AAEL007868 PE=3 SV=1                                    |
| CCG002039.1 | 1387 | 62   | 524 | 1.92078122 | 13.20702021 | 2.781539895  | Up   | 0         | 0         | AAEL013760-PA OS=Aedes<br>aegypti GN=AAEL013760 PE=3<br>SV=1                                                        |
| CCG022758.1 | 1190 | 76   | 524 | 2.74428557 | 15.39339246 | 2.487808692  | Up   | 0         | 0         | AAEL002010-PA OS=Aedes<br>aegypti GN=AAEL002010 PE=4<br>SV=1                                                        |
| CCG004061.1 | 1290 | 99   | 524 | 3.29767731 | 14.20010622 | 2.106379585  | Up   | 0         | 0         | AAEL012841-PA OS=Aedes<br>aegypti GN=AAEL012841 PE=4<br>SV=1                                                        |
| CCG027082.1 | 450  | 109  | 524 | 10.4082246 | 40.70697117 | 1.967551881  | Up   | 0         | 0         | -                                                                                                                   |
| CCG010175.1 | 1263 | 171  | 524 | 5.81775504 | 14.50367144 | 1.31788369   | Up   | 3.42E-13  | 9.25E-13  | Transcription initiation factor TFIID<br>subunit 7 OS=Culex<br>quinquefasciatus<br>GN=CpipJ_CPIJ008789 PE=4<br>SV=1 |
| CCG014382.1 | 2185 | 182  | 524 | 3.5791724  | 8.383586741 | 1.227941565  | Up   | 0         | 0         | AAEL012288-PA OS=Aedes<br>aegypti GN=AAEL012288 PE=3<br>SV=1                                                        |
| CCG027551.3 | 1874 | 1384 | 524 | 31.7343184 | 9.774886355 | -1.698892022 | Down | 2.20E-132 | 1.23E-131 | Methyltetrahydropteroyl<br>reductase OS=Culex<br>quinquefasciatus<br>GN=CpipJ_CPIJ003297 PE=2<br>SV=1               |
| CCG013191.1 | 396  | 4135 | 524 | 448.686497 | 46.25792179 | -3.277935409 | Down | 0         | 0         | AAEL002606-PA OS=Aedes<br>aegypti GN=AAEL002606 PE=4<br>SV=1                                                        |
| CCG020171.1 | 1808 | 0    | 525 | 0.001      | 10.15104829 | 13.3093411   | Up   | 4.44E-16  | 1.64E-15  | AAEL003429-PA OS=Aedes<br>aegypti GN=AAEL003429 PE=4<br>SV=1                                                        |
| CCG007387.1 | 875  | 60   | 525 | 2.94649609 | 20.97496606 | 2.831596221  | Up   | 0         | 0         | AAEL007655-PA OS=Aedes<br>aegypti GN=AAEL007655 PE=4<br>SV=1                                                        |

|             |       |      |     |            |             |              |      |           |           |                                                                      |
|-------------|-------|------|-----|------------|-------------|--------------|------|-----------|-----------|----------------------------------------------------------------------|
| CCG027081.1 | 1503  | 82   | 525 | 2.34432351 | 12.21097492 | 2.380934812  | Up   | 0         | 0         | AAEL007454-PA OS=Aedes aegypti GN=AAEL007454 PE=4 SV=1               |
| CCG011083.1 | 944   | 128  | 525 | 5.82640469 | 19.44183825 | 1.738486816  | Up   | 4.15E-14  | 1.42E-13  | AAEL013998-PA OS=Aedes aegypti GN=AAEL013998 PE=4 SV=1               |
| CCG012332.1 | 483   | 164  | 525 | 14.5901376 | 37.99812693 | 1.380934812  | Up   | 1.14E-13  | 3.54E-13  | AAEL012723-PA OS=Aedes aegypti GN=AAEL012723 PE=4 SV=1               |
| CCG024326.1 | 3354  | 41   | 526 | 0.52527106 | 5.482425039 | 3.383680188  | Up   | 1.02E-13  | 3.19E-13  | AAEL008178-PA OS=Aedes aegypti GN=AAEL008178 PE=3 SV=1               |
| CCG008235.1 | 1179  | 50   | 526 | 1.82229579 | 15.59631347 | 3.097376003  | Up   | 0         | 0         | AAEL006286-PA OS=Aedes aegypti GN=AAEL006286 PE=4 SV=1               |
| CCG019390.1 | 1059  | 72   | 526 | 2.92145504 | 17.36360112 | 2.571307192  | Up   | 0         | 0         | AAEL007356-PA OS=Aedes aegypti GN=AAEL007356 PE=4 SV=1               |
| CCG014258.1 | 435   | 92   | 526 | 9.08785192 | 42.27138755 | 2.217670237  | Up   | 1.44E-14  | 5.12E-14  | AAEL010680-PA OS=Aedes aegypti GN=AAEL010680 PE=4 SV=1               |
| CCG003345.1 | 1212  | 126  | 526 | 4.46715063 | 15.17166137 | 1.76395227   | Up   | 1.34E-13  | 4.06E-13  | AAEL005564-PA OS=Aedes aegypti GN=AAEL005564 PE=4 SV=1               |
| CCG013537.1 | 1860  | 139  | 526 | 3.21117909 | 9.886050313 | 1.62229112   | Up   | 1.46E-13  | 4.37E-13  | AAEL002478-PA OS=Aedes aegypti GN=AAEL002478 PE=4 SV=1               |
| CCG002495.1 | 1173  | 177  | 526 | 6.48392415 | 15.67609001 | 1.273626643  | Up   | 0         | 0         | AAEL000044-PB OS=Aedes aegypti GN=AAEL000044 PE=3 SV=1               |
| CCG015843.1 | 4476  | 1450 | 526 | 13.9200436 | 4.108144232 | -1.760604992 | Down | 1.01E-145 | 5.70E-145 | Uncharacterized protein OS=Anopheles darlingi GN=AND_01925 PE=4 SV=1 |
| CCG003547.2 | 12095 | 1566 | 526 | 5.56350594 | 1.520302074 | -1.871636304 | Down | 4.71E-171 | 2.73E-170 | -                                                                    |
| CCG018851.1 | 1881  | 151  | 527 | 3.4494577  | 9.794264678 | 1.505567616  | Up   | 0         | 0         | Acyl-coenzyme A oxidase OS=Aedes aegypti GN=AAEL000370 PE=3 SV=1     |
| CCG012581.2 | 1623  | 42   | 528 | 1.11197095 | 11.37274808 | 3.3543899    | Up   | 7.66E-14  | 2.47E-13  | AAEL003679-PA OS=Aedes aegypti GN=AAEL003679 PE=4 SV=1               |
| CCG001898.1 | 2796  | 69   | 528 | 1.06041191 | 6.601562996 | 2.638182866  | Up   | 0         | 0         | AAEL010387-PA OS=Aedes aegypti GN=AAEL010387 PE=4 SV=1               |
| CCG022441.1 | 1482  | 71   | 528 | 2.05860402 | 12.45477067 | 2.596960204  | Up   | 0         | 0         | AAEL004007-PA OS=Aedes aegypti GN=AAEL004007 PE=3 SV=1               |
| CCG017419.1 | 1770  | 173  | 528 | 4.19986672 | 10.42823172 | 1.312079096  | Up   | 3.60E-13  | 9.69E-13  | AAEL012076-PA OS=Aedes aegypti GN=AAEL012076 PE=4 SV=1               |



|             |       |      |     |            |             |              |      |           |           |                                                                   |
|-------------|-------|------|-----|------------|-------------|--------------|------|-----------|-----------|-------------------------------------------------------------------|
| CCG019362.1 | 13426 | 1405 | 528 | 4.49668383 | 1.374792949 | -1.709647092 | Down | 1.45E-135 | 8.12E-135 | AAEL005179-PA OS=Aedes aegypti GN=AAEL005179 PE=4 SV=1            |
| CCG018673.1 | 1630  | 52   | 529 | 1.37081362 | 11.34535485 | 3.048997398  | Up   | 0         | 0         | AAEL009727-PA OS=Aedes aegypti GN=AAEL009727 PE=4 SV=1            |
| CCG007096.1 | 935   | 65   | 529 | 2.9872008  | 19.77853306 | 2.727069303  | Up   | 0         | 0         | AAEL011851-PA OS=Aedes aegypti GN=AAEL011851 PE=4 SV=1            |
| CCG008505.1 | 2531  | 129  | 529 | 2.1900813  | 7.306569898 | 1.738209861  | Up   | 0         | 0         | AAEL014815-PA (Fragment) OS=Aedes aegypti GN=AAEL014815 PE=4 SV=1 |
| CCG007928.1 | 687   | 151  | 529 | 9.44458505 | 26.91838197 | 1.511032377  | Up   | 0         | 0         | AAEL010931-PA OS=Aedes aegypti GN=AAEL010931 PE=2 SV=1            |
| CCG016673.1 | 1143  | 163  | 529 | 6.12779242 | 16.17928995 | 1.400708962  | Up   | 1.80E-13  | 5.24E-13  | AAEL000459-PA OS=Aedes aegypti GN=AAEL000459 PE=4 SV=1            |
| CCG025467.2 | 664   | 1165 | 529 | 75.3911759 | 27.8507958  | -1.436677124 | Down | 1.22E-87  | 6.31E-87  | AAEL009810-PA OS=Aedes aegypti GN=AAEL009810 PE=2 SV=1            |
| CCG010991.1 | 2460  | 53   | 530 | 0.92577071 | 7.531661256 | 3.024241299  | Up   | 0         | 0         | AAEL013940-PA OS=Aedes aegypti GN=AAEL013940 PE=4 SV=1            |
| CCG017306.1 | 639   | 107  | 530 | 7.19524508 | 28.99512784 | 2.010694767  | Up   | 0         | 0         | AAEL006599-PA OS=Aedes aegypti GN=AAEL006599 PE=4 SV=1            |
| CCG013005.1 | 1152  | 1071 | 530 | 39.9484251 | 16.08323497 | -1.312581011 | Down | 1.79E-70  | 8.87E-70  | AAEL011393-PA OS=Aedes aegypti GN=AAEL011393 PE=4 SV=1            |
| CCG020516.1 | 1472  | 48   | 531 | 1.401187   | 12.61062837 | 3.169918754  | Up   | 5.35E-14  | 1.79E-13  | AAEL014536-PA OS=Aedes aegypti GN=AAEL014536 PE=4 SV=1            |
| CCG025793.1 | 519   | 53   | 531 | 4.38804612 | 35.76656063 | 3.0269608    | Up   | 0         | 0         | AAEL011330-PA OS=Aedes aegypti GN=AAEL011330 PE=4 SV=1            |
| CCG001252.1 | 1200  | 67   | 531 | 2.39914352 | 15.46903747 | 2.688792064  | Up   | 0         | 0         | AAEL006915-PA OS=Aedes aegypti GN=AAEL006915 PE=4 SV=1            |
| CCG005714.1 | 1018  | 163  | 531 | 6.88022273 | 18.23462177 | 1.4061531    | Up   | 1.80E-13  | 5.24E-13  | AAEL003206-PA OS=Aedes aegypti GN=AAEL003206 PE=4 SV=1            |
| CCG011401.1 | 2379  | 181  | 531 | 3.26924    | 7.802793176 | 1.255035368  | Up   | 1.53E-13  | 4.55E-13  | AAEL015283-PA OS=Aedes aegypti GN=AAEL015283 PE=4 SV=1            |
| CCG014041.1 | 1161  | 207  | 531 | 7.66127051 | 15.98866922 | 1.061394297  | Up   | 6.88E-15  | 2.47E-14  | AAEL002078-PA OS=Aedes aegypti GN=AAEL002078 PE=4 SV=1            |

|             |      |      |     |            |             |              |      |          |          |                                                                                                   |
|-------------|------|------|-----|------------|-------------|--------------|------|----------|----------|---------------------------------------------------------------------------------------------------|
| CCG016111.1 | 6177 | 2432 | 531 | 16.9179852 | 3.00515541  | -2.493046259 | Down | 0        | 0        | Putative uncharacterized protein<br>OS=Culex quinquefasciatus<br>GN=CpipJ_CPIJ006967 PE=3<br>SV=1 |
| CCG003532.1 | 1764 | 150  | 532 | 3.653889   | 10.54297236 | 1.528776949  | Up   | 0        | 0        | AAEL009340-PA OS=Aedes<br>aegypti GN=AAEL009340 PE=4<br>SV=1                                      |
| CCG007611.1 | 2388 | 23   | 533 | 0.4138626  | 7.802663953 | 4.236742971  | Up   | 4.01E-11 | 8.67E-11 | AAEL004302-PA OS=Aedes<br>aegypti GN=AAEL004302 PE=4<br>SV=1                                      |
| CCG022222.1 | 1026 | 102  | 533 | 4.27184496 | 18.16058628 | 2.087879585  | Up   | 0        | 0        | AAEL014296-PA OS=Aedes<br>aegypti GN=AAEL014296 PE=4<br>SV=1                                      |
| CCG004643.3 | 5330 | 140  | 533 | 1.12866095 | 3.495827677 | 1.63102191   | Up   | 0        | 0        | Zinc finger protein 7 OS=Mus<br>musculus GN=Zfp7 PE=2 SV=1                                        |
| CCG014165.1 | 2065 | 162  | 533 | 3.37099129 | 9.023129065 | 1.420454924  | Up   | 0        | 0        | AAEL002821-PA OS=Aedes<br>aegypti GN=AAEL002821 PE=4<br>SV=1                                      |
| CCG007770.1 | 1099 | 70   | 534 | 2.73692577 | 16.98609627 | 2.633726119  | Up   | 0        | 0        | AAEL009501-PA OS=Aedes<br>aegypti GN=AAEL009501 PE=3<br>SV=1                                      |
| CCG000412.1 | 466  | 120  | 534 | 11.0651677 | 40.05948454 | 1.85611854   | Up   | 0        | 0        | -                                                                                                 |
| CCG000138.1 | 1215 | 176  | 534 | 6.22442246 | 15.36437843 | 1.303577517  | Up   | 0        | 0        | AAEL009984-PA OS=Aedes<br>aegypti GN=AAEL009984 PE=4<br>SV=1                                      |
| CCG017729.1 | 7689 | 1125 | 534 | 6.28702711 | 2.427847548 | -1.372700151 | Down | 4.06E-79 | 2.06E-78 | AAEL011164-PA (Fragment)<br>OS=Aedes aegypti<br>GN=AAEL011164 PE=4 SV=1                           |
| CCG014916.1 | 393  | 76   | 535 | 8.30966878 | 47.58951164 | 2.517780772  | Up   | 0        | 0        | AAEL006346-PA OS=Aedes<br>aegypti GN=AAEL006346 PE=4<br>SV=1                                      |
| CCG016164.1 | 1245 | 104  | 535 | 3.58943968 | 15.02223138 | 2.065268567  | Up   | 0        | 0        | AAEL012034-PA OS=Aedes<br>aegypti GN=AAEL012034 PE=4<br>SV=1                                      |
| CCG001063.1 | 1809 | 198  | 535 | 4.70315503 | 10.33868329 | 1.136351665  | Up   | 0        | 0        | AAEL010761-PA OS=Aedes<br>aegypti GN=AAEL010761 PE=4<br>SV=1                                      |
| CCG004833.1 | 591  | 35   | 536 | 2.54473894 | 31.70496844 | 3.639119377  | Up   | 6.39E-14 | 2.10E-13 | AAEL010109-PA OS=Aedes<br>aegypti GN=AAEL010109 PE=4<br>SV=1                                      |
| CCG009904.1 | 657  | 114  | 536 | 7.45593569 | 28.51999444 | 1.93551238   | Up   | 8.48E-14 | 2.70E-13 | AAEL009051-PA (Fragment)<br>OS=Aedes aegypti GN=TPX5<br>PE=4 SV=2                                 |
| CCG024074.1 | 2973 | 141  | 536 | 2.0379188  | 6.302602203 | 1.628851042  | Up   | 0        | 0        | AAEL005848-PA OS=Aedes<br>aegypti GN=AAEL005848 PE=4<br>SV=1                                      |

|             |      |      |     |            |             |              |      |           |           |                                                                                                |
|-------------|------|------|-----|------------|-------------|--------------|------|-----------|-----------|------------------------------------------------------------------------------------------------|
| CCG002692.1 | 4035 | 2126 | 536 | 22.6403112 | 4.643776047 | -2.285523487 | Down | 2.41E-300 | 1.52E-299 | Bruchpilot OS=Culex quinquefasciatus<br>GN=CpipJ_CPIJ017714 PE=4<br>SV_1                       |
| CCG026180.1 | 583  | 7    | 537 | 0.51593163 | 32.19999078 | 5.96373656   | Up   | 4.31E-06  | 7.69E-06  | -                                                                                              |
| CCG027212.1 | 1176 | 64   | 537 | 2.33848896 | 15.96309067 | 2.771091482  | Up   | 0         | 0         | Ferrochelatase OS=Aedes aegypti<br>GN=AAEL005415 PE=3 SV=1                                     |
| CCG000366.1 | 2021 | 80   | 537 | 1.70092962 | 9.288765278 | 2.449163387  | Up   | 0         | 0         | AAEL007980-PA OS=Aedes aegypti GN=AAEL007980 PE=4<br>SV_1                                      |
| CCG016434.1 | 946  | 95   | 537 | 4.31514248 | 19.84418037 | 2.201235873  | Up   | 0         | 0         | AAEL003650-PA OS=Aedes aegypti GN=AAEL003650 PE=4<br>SV_1                                      |
| CCG009661.1 | 909  | 139  | 537 | 6.57072949 | 20.65191928 | 1.652150409  | Up   | 1.46E-13  | 4.37E-13  | Putative uncharacterized protein OS=Culex quinquefasciatus<br>GN=CpipJ_CPIJ001384 PE=4<br>SV_1 |
| CCG005110.1 | 1854 | 42   | 538 | 0.97342441 | 10.14431117 | 3.381458144  | Up   | 7.66E-14  | 2.47E-13  | AAEL001175-PA OS=Aedes aegypti GN=AAEL001175 PE=4<br>SV_1                                      |
| CCG017765.1 | 1017 | 140  | 538 | 5.91520437 | 18.49316903 | 1.644492549  | Up   | 0         | 0         | AAEL006221-PA OS=Aedes aegypti GN=AAEL006221 PE=4<br>SV_1                                      |
| CCG002288.1 | 1422 | 16   | 539 | 0.48348506 | 13.2507111  | 4.776454667  | Up   | 7.09E-09  | 1.42E-08  | AAEL004468-PA OS=Aedes aegypti GN=AAEL004468 PE=4<br>SV_1                                      |
| CCG000468.1 | 457  | 142  | 539 | 13.3516462 | 41.23087786 | 1.626707547  | Up   | 2.62E-13  | 7.34E-13  | AAEL012284-PA OS=Aedes aegypti GN=AAEL012284 PE=4<br>SV_1                                      |
| CCG000351.1 | 978  | 69   | 540 | 3.03160704 | 19.30211601 | 2.670604344  | Up   | 0         | 0         | AAEL004625-PA OS=Aedes aegypti GN=AAEL004625 PE=4<br>SV_1                                      |
| CCG012351.1 | 351  | 100  | 540 | 12.2420896 | 53.78196427 | 2.135272611  | Up   | 0         | 0         | AAEL000456-PA OS=Aedes aegypti GN=AAEL000456 PE=4<br>SV_1                                      |
| CCG004341.1 | 2604 | 125  | 540 | 2.06267927 | 7.249412234 | 1.813344516  | Up   | 2.35E-14  | 8.22E-14  | AAEL012741-PA OS=Aedes aegypti GN=AAEL012741 PE=4<br>SV_1                                      |
| CCG015482.1 | 1566 | 139  | 540 | 3.81404413 | 12.0545782  | 1.660187728  | Up   | 1.46E-13  | 4.37E-13  | AAEL006290-PA OS=Aedes aegypti GN=AAEL006290 PE=4<br>SV_1                                      |
| CCG017308.1 | 1170 | 191  | 540 | 7.01471736 | 16.13458928 | 1.201699973  | Up   | 6.68E-14  | 2.19E-13  | Putative uncharacterized protein OS=Culex quinquefasciatus<br>GN=CpipJ_CPIJ003916 PE=4<br>SV_1 |
| CCG015511.1 | 1863 | 208  | 540 | 4.79747976 | 10.13283385 | 1.078689083  | Up   | 3.93E-13  | 1.05E-12  | AAEL006244-PA OS=Aedes aegypti GN=AAEL006244 PE=4<br>SV_1                                      |

|             |      |      |     |            |             |              |      |          |            |                                                                                                   |
|-------------|------|------|-----|------------|-------------|--------------|------|----------|------------|---------------------------------------------------------------------------------------------------|
| CCG014537.1 | 563  | 2    | 541 | 0.15264559 | 33.59223399 | 7.781797988  | Up   | 9.36E-05 | 0.00015332 | Histone H2B OS=Aedes aegypti<br>GN=AAEL015674 PE=3 SV=1                                           |
| CCG007424.2 | 957  | 60   | 541 | 2.69402725 | 19.76220244 | 2.874907392  | Up   | 0        | 0          | Aldo/keto reductase OS=Aedes<br>aegypti PE=2 SV=1                                                 |
| CCG003751.1 | 687  | 76   | 541 | 4.75356598 | 27.52900689 | 2.533870474  | Up   | 0        | 0          | Putative lipoyltransferase 2,<br>mitochondrial OS=Aedes aegypti<br>GN=AAEL009657 PE=3 SV=1        |
| CCG021078.1 | 1058 | 88   | 541 | 3.5740422  | 17.87564058 | 2.322366369  | Up   | 2.93E-14 | 1.02E-13   | AAEL009459-PA OS=Aedes<br>aegypti GN=AAEL009459 PE=4<br>SV=1                                      |
| CCG024281.1 | 2172 | 139  | 541 | 2.74990475 | 8.707379251 | 1.662856915  | Up   | 1.46E-13 | 4.37E-13   | Putative uncharacterized protein<br>OS=Culex quinquefasciatus<br>GN=CpipJ_CPIJ005947 PE=4<br>SV=1 |
| CCG004438.1 | 5810 | 219  | 541 | 1.61968535 | 3.255151073 | 1.007010928  | Up   | 4.32E-13 | 1.14E-12   | AAEL000715-PA OS=Aedes<br>aegypti GN=AAEL006715 PE=4<br>SV=1                                      |
| CCG014205.1 | 5256 | 1002 | 541 | 8.19171881 | 3.598254896 | -1.186868806 | Down | 1.36E-56 | 6.48E-56   | Abc transporter OS=Culex<br>quinquefasciatus<br>GN=CpipJ_CPIJ009791 PE=3<br>SV=1                  |
| CCG012548.1 | 1263 | 10   | 542 | 0.34021959 | 15.00188916 | 5.46253415   | Up   | 5.43E-07 | 1.01E-06   | Predicted protein OS=Culex<br>quinquefasciatus<br>GN=CpipJ_CPIJ019142 PE=4<br>SV=1                |
| CCG028259.1 | 1766 | 93   | 542 | 2.26284559 | 10.72898415 | 2.245303434  | Up   | 4.04E-14 | 1.38E-13   | AAEL000292-PA OS=Aedes<br>aegypti GN=AAEL000292 PE=4<br>SV=1                                      |
| CCG011340.1 | 630  | 127  | 542 | 8.66215285 | 30.07521589 | 1.795777558  | Up   | 1.57E-13 | 4.67E-13   | Putative uncharacterized protein<br>OS=Culex quinquefasciatus<br>GN=CpipJ_CPIJ003834 PE=4<br>SV=1 |
| CCG001482.1 | 813  | 201  | 542 | 10.6235137 | 23.30551785 | 1.133410554  | Up   | 0        | 0          | SCO1, mitochondrial OS=Culex<br>quinquefasciatus<br>GN=CpipJ_CPIJ003089 PE=4<br>SV=1              |
| CCG017255.1 | 2320 | 6407 | 542 | 118.666849 | 8.166976729 | -3.86097103  | Down | 0        | 0          | AAEL014553-PA OS=Aedes<br>aegypti GN=AAEL014553 PE=3<br>SV=1                                      |
| CCG011881.1 | 759  | 32   | 543 | 1.81163571 | 25.00967627 | 3.787121592  | Up   | 1.77E-13 | 5.17E-13   | AAEL005632-PA OS=Aedes<br>aegypti GN=AAEL005632 PE=4<br>SV=1                                      |
| CCG016966.1 | 561  | 150  | 543 | 11.4892339 | 33.83662083 | 1.558302901  | Up   | 0        | 0          | AAEL000780-PA OS=Aedes<br>aegypti GN=AAEL006786 PE=3<br>SV=1                                      |

|             |       |      |     |            |             |              |      |           |           |                                                                                                        |
|-------------|-------|------|-----|------------|-------------|--------------|------|-----------|-----------|--------------------------------------------------------------------------------------------------------|
| CCG019048.1 | 697   | 161  | 543 | 9.92557715 | 27.23435335 | 1.456204714  | Up   | 0         | 0         | AAEL009140-PA OS=Aedes aegypti GN=AAEL009140 PE=4 SV=1                                                 |
| CCG024337.1 | 966   | 113  | 544 | 5.02648034 | 19.68664862 | 1.969597083  | Up   | 1.42E-13  | 4.27E-13  | Cuiclicron OS=Culex quinquefasciatus GN=CpipJ_CPIJ005389 PE=4 SV=1                                     |
| CCG008216.1 | 1938  | 114  | 544 | 2.52763145 | 9.81284962  | 1.956886031  | Up   | 8.48E-14  | 2.70E-13  | Mediator of RNA polymerase II transcription subunit 16 OS=Acromyrmex echinatior GN=G5I_13705 PE=4 SV=1 |
| CCG001966.1 | 3486  | 128  | 544 | 1.57777568 | 5.455336364 | 1.789776045  | Up   | 4.15E-14  | 1.42E-13  | AAEL010924-PA OS=Aedes aegypti GN=AAEL010924 PE=4 SV=1                                                 |
| CCG017567.1 | 660   | 170  | 544 | 11.0679619 | 28.81409479 | 1.380385109  | Up   | 3.53E-13  | 9.53E-13  | AAEL006867-PA OS=Aedes aegypti GN=AAEL006867 PE=4 SV=1                                                 |
| CCG011249.1 | 35686 | 1306 | 544 | 1.57256272 | 0.532906534 | -1.561163136 | Down | 9.03E-111 | 4.86E-110 | AAEL006269-PA OS=Aedes aegypti GN=AAEL006269 PE=4 SV=1                                                 |
| CCG004262.1 | 1083  | 9    | 545 | 0.35708921 | 17.59211527 | 5.622500622  | Up   | 1.09E-06  | 2.01E-06  | AAEL009916-PA OS=Aedes aegypti GN=AAEL009916 PE=4 SV=1                                                 |
| CCG017043.1 | 2592  | 218  | 545 | 3.61396688 | 7.350409275 | 1.024241299  | Up   | 0         | 0         | AAEL008807-PA OS=Aedes aegypti GN=AAEL008807 PE=4 SV=1                                                 |
| CCG012843.1 | 1461  | 3766 | 545 | 110.762506 | 13.04056183 | -3.086391661 | Down | 0         | 0         | AAEL010951-PA OS=Aedes aegypti GN=AAEL010951 PE=3 SV=1                                                 |
| CCG005005.1 | 909   | 55   | 546 | 2.59992894 | 20.99804083 | 3.013710631  | Up   | 0         | 0         | Nuclear receptor FTZ-F1 protein OS=Aedes aegypti GN=FTZ-F1 PE=2 SV=1                                   |
| CCG021010.1 | 1092  | 58   | 546 | 2.28227528 | 17.47913839 | 2.93708935   | Up   | 0         | 0         | AAEL003878-PA OS=Aedes aegypti GN=AAEL003878 PE=4 SV=1                                                 |
| CCG016316.1 | 966   | 107  | 546 | 4.75958758 | 19.759026   | 2.053603358  | Up   | 0         | 0         | AAEL008941-PA OS=Aedes aegypti GN=AAEL008941 PE=4 SV=1                                                 |
| CCG026816.1 | 1287  | 185  | 546 | 6.17669068 | 14.83078409 | 1.263688884  | Up   | 0         | 0         | Putative uncharacterized protein OS=Culex quinquefasciatus GN=CpipJ_CPIJ006253 PE=4 SV=1               |
| CCG018190.1 | 717   | 941  | 546 | 56.3940311 | 26.62094717 | -1.082980568 | Down | 3.71E-46  | 1.70E-45  | AAEL004728-PA OS=Aedes aegypti GN=AAEL004728 PE=4 SV=1                                                 |
| CCG006509.1 | 993   | 15   | 547 | 0.64908965 | 19.25697623 | 4.890819631  | Up   | 1.48E-08  | 2.93E-08  | AAEL000698-PA OS=Aedes aegypti GN=AAEL000698 PE=4 SV=1                                                 |

|             |      |       |     |            |             |              |      |          |          |                                                                            |
|-------------|------|-------|-----|------------|-------------|--------------|------|----------|----------|----------------------------------------------------------------------------|
| CCG005079.1 | 1206 | 89    | 547 | 3.17106665 | 15.85586849 | 2.321976796  | Up   | 0        | 0        | Uncharacterized protein<br>OS=Anopheles darlingi<br>GN=AND_15285 PE=4 SV=1 |
| CCG025104.1 | 1281 | 113   | 547 | 3.79046059 | 14.92753895 | 1.977531264  | Up   | 1.42E-13 | 4.27E-13 | AAEL002129-PA OS=Aedes<br>aegypti GN=AAEL002129 PE=4<br>SV=1               |
| CCG025833.1 | 6669 | 5142  | 547 | 33.1309605 | 2.867323046 | -3.530403668 | Down | 0        | 0        | AAEL002228-PA OS=Aedes<br>aegypti GN=AAEL002228 PE=4<br>SV=1               |
| CCG006088.1 | 1563 | 0     | 548 | 0.001      | 12.2566447  | 13.58127647  | Up   | 4.44E-16 | 1.66E-15 | AAEL005916-PA OS=Aedes<br>aegypti GN=AAEL005916 PE=4<br>SV=1               |
| CCG023770.1 | 2146 | 12    | 548 | 0.24027811 | 8.926903854 | 5.215382786  | Up   | 1.30E-07 | 2.49E-07 | AAEL001635-PA OS=Aedes<br>aegypti GN=AAEL001635 PE=4<br>SV=1               |
| CCG010101.1 | 1503 | 38    | 548 | 1.08639382 | 12.74593192 | 3.552417773  | Up   | 4.26E-14 | 1.45E-13 | AAEL012851-PA OS=Aedes<br>aegypti GN=AAEL012851 PE=4<br>SV=1               |
| CCG001663.1 | 414  | 99    | 548 | 10.2753713 | 46.27327457 | 2.170988667  | Up   | 0        | 0        | -                                                                          |
| CCG020685.1 | 4077 | 106   | 548 | 1.11719202 | 4.698831413 | 2.072424832  | Up   | 0        | 0        | AAEL008592-PA OS=Aedes<br>aegypti GN=AAEL008592 PE=3<br>SV=1               |
| CCG010181.1 | 1977 | 145   | 548 | 3.15154857 | 9.690002869 | 1.620436197  | Up   | 0        | 0        | AAEL006459-PA OS=Aedes<br>aegypti GN=AAEL006459 PE=4<br>SV=1               |
| CCG010204.2 | 1965 | 148   | 548 | 3.23639731 | 9.749178459 | 1.590891921  | Up   | 0        | 0        | AAEL001729-PA OS=Aedes<br>aegypti GN=AAEL001729 PE=4<br>SV=1               |
| CCG016294.1 | 1016 | 189   | 548 | 7.99338567 | 18.8554485  | 1.238102863  | Up   | 2.34E-13 | 6.64E-13 | AAEL001105-PA OS=Aedes<br>aegypti GN=AAEL001105 PE=4<br>SV=1               |
| CCG026613.1 | 2619 | 1237  | 548 | 20.2953653 | 7.314675705 | -1.472284498 | Down | 2.23E-96 | 1.17E-95 | AAEL001320-PA OS=Aedes<br>aegypti GN=CYP9M4 PE=3 SV=1                      |
| CCG001672.1 | 984  | 22    | 549 | 0.96070545 | 19.50416052 | 4.343543924  | Up   | 8.38E-11 | 1.80E-10 | AAEL012018-PA OS=Aedes<br>aegypti GN=AAEL012018 PE=4<br>SV=1               |
| CCG011298.1 | 3741 | 47    | 549 | 0.53984965 | 5.13020421  | 3.248386691  | Up   | 0        | 0        | AAEL010940-PA (Fragment)<br>OS=Aedes aegypti<br>GN=AAEL010940 PE=4 SV=1    |
| CCG009266.1 | 498  | 163   | 549 | 14.064391  | 38.53834126 | 1.454247389  | Up   | 1.80E-13 | 5.24E-13 | AAEL003180-PA OS=Aedes<br>aegypti GN=AAEL003180 PE=4<br>SV=1               |
| CCG007239.1 | 1986 | 180   | 549 | 3.89453788 | 9.663692824 | 1.311122446  | Up   | 3.32E-13 | 9.05E-13 | AAEL006362-PA OS=Aedes<br>aegypti GN=AAEL006362 PE=3<br>SV=1               |
| CCG022399.1 | 5607 | 23735 | 549 | 181.895247 | 3.422881032 | -5.731752886 | Down | 0        | 0        | AAEL005416-PA OS=Aedes<br>aegypti GN=AAEL005416 PE=4<br>SV=1               |

|             |      |      |     |            |             |             |      |          |          |                                                                                                   |
|-------------|------|------|-----|------------|-------------|-------------|------|----------|----------|---------------------------------------------------------------------------------------------------|
| CCG006983.1 | 1088 | 17   | 550 | 0.6714021  | 17.671923   | 4.718138171 | Up   | 3.39E-09 | 6.89E-09 | Putative uncharacterized protein<br>OS=Culex quinquefasciatus<br>GN=CpipJ_CPIJ002513 PE=4<br>SV=1 |
| CCG009017.1 | 836  | 82   | 550 | 4.21473473 | 22.9988663  | 2.448049008 | Up   | 0        | 0        | AAEL014657-PA OS=Aedes<br>aegypti GN=AAEL014657 PE=4<br>SV=1                                      |
| CCG020522.1 | 999  | 92   | 550 | 3.95717276 | 19.24629852 | 2.282039056 | Up   | 1.44E-14 | 5.11E-14 | AAEL008561-PA OS=Aedes<br>aegypti GN=AAEL008561 PE=4<br>SV=1                                      |
| CCG026454.1 | 966  | 116  | 550 | 5.15992672 | 19.90378077 | 1.947620017 | Up   | 1.16E-13 | 3.59E-13 | AAEL003202-PA OS=Aedes<br>aegypti GN=AAEL003202 PE=4<br>SV=1                                      |
| CCG006248.1 | 910  | 204  | 550 | 9.63277567 | 21.12862882 | 1.13317567  | Up   | 6.59E-14 | 2.17E-13 | cGMP-phosphodiesterase delta<br>subunit OS=Glossina morsitans<br>morsitans PE=2 SV=1              |
| CCG003024.1 | 792  | 210  | 550 | 11.3934902 | 24.27658109 | 1.091355495 | Up   | 0        | 0        | AAEL010803-PA (Fragment)<br>OS=Aedes aegypti<br>GN=AAEL010803 PE=3 SV=1                           |
| CCG014709.2 | 1309 | 20   | 551 | 0.65652765 | 14.71505768 | 4.486293618 | Up   | 3.69E-10 | 7.71E-10 | Putative uncharacterized protein<br>OS=Culex quinquefasciatus<br>GN=CpipJ_CPIJ010882 PE=4<br>SV=1 |
| CCG016515.1 | 1016 | 67   | 551 | 2.83363407 | 18.95867175 | 2.742132522 | Up   | 0        | 0        | AAEL006177-PA OS=Aedes<br>aegypti GN=AAEL006177 PE=4<br>SV=1                                      |
| CCG025747.1 | 591  | 107  | 551 | 7.77963046 | 32.59223435 | 2.066754726 | Up   | 0        | 0        | AAEL012990-PA OS=Aedes<br>aegypti GN=AAEL012990 PE=4<br>SV=1                                      |
| CCG000822.1 | 615  | 134  | 551 | 9.36251128 | 31.32034228 | 1.742132522 | Up   | 0        | 0        | AAEL006654-PA OS=Aedes<br>aegypti GN=AAEL006654 PE=4<br>SV=1                                      |
| CCG009433.1 | 1312 | 161  | 551 | 5.27296286 | 14.68141044 | 1.477304834 | Up   | 0        | 0        | AAEL003084-PA (Fragment)<br>OS=Aedes aegypti<br>GN=AAEL801117_b PE=2 SV=1                         |
| CCG002892.1 | 777  | 189  | 551 | 10.4520976 | 24.79023231 | 1.245979288 | Up   | 2.34E-13 | 6.65E-13 | AAEL011810-PA OS=Aedes<br>aegypti GN=AAEL011810 PE=4<br>SV=1                                      |
| CCG003412.1 | 1770 | 4274 | 551 | 103.758557 | 10.88249181 | -3.25314948 | Down | 0        | 0        | AAEL004366-PA OS=Aedes<br>aegypti GN=AAEL004366 PE=4<br>SV=1                                      |
| CCG010907.1 | 467  | 6    | 552 | 0.55207368 | 41.32113229 | 6.22587516  | Up   | 8.38E-06 | 1.47E-05 | Histone H2A OS=Gasterosteus<br>aculeatus PE=3 SV=1                                                |
| CCG015016.1 | 940  | 13   | 552 | 0.59426229 | 20.52869019 | 5.110397942 | Up   | 6.34E-08 | 1.23E-07 | AAEL010667-PA OS=Aedes<br>aegypti GN=AAEL010667 PE=3<br>SV=1                                      |

|             |      |      |     |            |             |              |      |           |            |                                                                      |
|-------------|------|------|-----|------------|-------------|--------------|------|-----------|------------|----------------------------------------------------------------------|
| CCG019027.1 | 966  | 47   | 552 | 2.09065997 | 19.97615816 | 3.256248809  | Up   | 0         | 0          | AAEL008833-PA OS=Aedes aegypti GN=AAEL008833 PE=4 SV=1               |
| CCG004022.2 | 655  | 78   | 552 | 5.11700656 | 29.46102104 | 2.525435442  | Up   | 0         | 0          | AAEL007790-PA OS=Aedes aegypti GN=AAEL007790 PE=4 SV=1               |
| CCG000134.1 | 1814 | 118  | 552 | 2.79516465 | 10.63779977 | 1.928194611  | Up   | 0         | 0          | AAEL002426-PA OS=Aedes aegypti GN=AAEL002426 PE=4 SV=1               |
| CCG016669.1 | 862  | 166  | 552 | 8.27491409 | 22.38627468 | 1.435798229  | Up   | 1.83E-13  | 5.32E-13   | AAEL000410-PA OS=Aedes aegypti GN=AAEL000410 PE=3 SV=1               |
| CCG025984.1 | 1569 | 194  | 552 | 5.31302009 | 12.29889661 | 1.210924818  | Up   | 5.97E-13  | 1.53E-12   | AAEL002013-PA OS=Aedes aegypti GN=AAEL002013 PE=4 SV=1               |
| CCG018349.1 | 2766 | 973  | 552 | 15.1155285 | 6.976489074 | -1.115458334 | Down | 6.20E-50  | 2.89E-49   | AAEL008629-PA OS=Aedes aegypti GN=AAEL008629 PE=3 SV=1               |
| CCG010649.1 | 464  | 1    | 553 | 0.09260719 | 41.66363589 | 8.813448874  | Up   | 0.000587  | 0.00091581 | Histone H2A OS=Gasterosteus aculeatus PE=3 SV=1                      |
| CCG018544.1 | 3411 | 107  | 553 | 1.3479219  | 5.667524789 | 2.071981888  | Up   | 0         | 0          | AAEL010928-PA (Fragment) OS=Aedes aegypti GN=AAEL010928 PE=4 SV=1    |
| CCG001269.1 | 8017 | 1492 | 553 | 7.99686217 | 2.411366728 | -1.729582946 | Down | 3.33E-146 | 1.89E-145  | AAEL009173-PA OS=Aedes aegypti GN=AAEL009173 PE=4 SV=1               |
| CCG001804.1 | 1371 | 4    | 554 | 0.12536757 | 14.12610163 | 6.81605537   | Up   | 2.95E-05  | 5.03E-05   | AAEL013582-PA OS=Aedes aegypti GN=AAEL013582 PE=4 SV=1               |
| CCG021990.1 | 1653 | 4    | 554 | 0.10398    | 11.71620407 | 6.81605537   | Up   | 2.95E-05  | 5.03E-05   | AAEL006333-PA OS=Aedes aegypti GN=AAEL006333 PE=3 SV=1               |
| CCG014241.1 | 1108 | 86   | 554 | 3.33519601 | 17.47913839 | 2.389790615  | Up   | 0         | 0          | AAEL006839-PA OS=Aedes aegypti GN=AAEL006839 PE=4 SV=1               |
| CCG024347.1 | 2386 | 4100 | 554 | 73.8373478 | 8.116884045 | -3.185352825 | Down | 0         | 0          | AAEL005249-PA OS=Aedes aegypti GN=AAEL005249 PE=3 SV=1               |
| CCG005416.1 | 1293 | 21   | 555 | 0.69788432 | 15.00529281 | 4.426339742  | Up   | 1.76E-10  | 3.72E-10   | AAEL003773-PA OS=Aedes aegypti GN=AAEL003773 PE=4 SV=1               |
| CCG011513.1 | 1710 | 30   | 555 | 0.75385499 | 11.34610737 | 3.911766569  | Up   | 3.71E-13  | 9.95E-13   | AAEL007045-PA OS=Aedes aegypti GN=AAEL007045 PE=4 SV=1               |
| CCG023392.1 | 1475 | 47   | 555 | 1.3692051  | 13.15379228 | 3.264068313  | Up   | 0         | 0          | Uncharacterized protein OS=Anopheles darlingi GN=AND_05553 PE=4 SV=1 |



|             |      |      |     |            |             |              |      |          |            |                                                                   |
|-------------|------|------|-----|------------|-------------|--------------|------|----------|------------|-------------------------------------------------------------------|
| CCG016435.2 | 1326 | 143  | 555 | 4.63399099 | 14.63185793 | 1.658785828  | Up   | 0        | 0          | AAEL003650-PA OS=Aedes aegypti GN=AAEL003650 PE=4 SV=1            |
| CCG015756.1 | 2195 | 2369 | 555 | 46.3759915 | 8.839108706 | -2.391405318 | Down | 0        | 0          | AAEL000992-PA OS=Aedes aegypti GN=CYP6AG6 PE=3 SV=1               |
| CCG027682.1 | 579  | 0    | 556 | 0.001      | 33.56960602 | 15.03486798  | Up   | 4.44E-16 | 1.65E-15   | AAEL000655-PA OS=Aedes aegypti GN=AAEL008835 PE=4 SV=1            |
| CCG011766.1 | 5769 | 135  | 556 | 1.00553201 | 3.369180427 | 1.744438679  | Up   | 1.90E-13 | 5.48E-13   | AAEL012505-PA OS=Aedes aegypti GN=AAEL012505 PE=4 SV=1            |
| CCG003698.1 | 1862 | 185  | 556 | 4.26928083 | 10.43866911 | 1.289872816  | Up   | 0        | 0          | AAEL005057-PA OS=Aedes aegypti GN=AAEL005057 PE=4 SV=1            |
| CCG017629.1 | 675  | 3145 | 556 | 200.207134 | 28.79526205 | -2.797590025 | Down | 0        | 0          | AAEL004987-PA OS=Aedes aegypti GN=AAEL004987 PE=4 SV=1            |
| CCG001479.1 | 1344 | 42   | 557 | 1.34280421 | 14.48791679 | 3.431529298  | Up   | 7.66E-14 | 2.48E-13   | AAEL010138-PA OS=Aedes aegypti GN=AAEL010138 PE=4 SV=1            |
| CCG011148.1 | 3114 | 60   | 557 | 0.82793323 | 6.252973719 | 2.916956126  | Up   | 0        | 0          | AAEL005888-PA OS=Aedes aegypti GN=AAEL005888 PE=4 SV=1            |
| CCG002514.1 | 1809 | 73   | 557 | 1.7339915  | 10.76382541 | 2.634022162  | Up   | 0        | 0          | AAEL005478-PA (Fragment) OS=Aedes aegypti GN=AAEL005478 PE=4 SV=1 |
| CCG025433.1 | 2637 | 78   | 557 | 1.27100466 | 7.384057703 | 2.538444502  | Up   | 0        | 0          | AAEL005438-PA OS=Aedes aegypti GN=AAEL005438 PE=4 SV=1            |
| CCG024753.1 | 981  | 1    | 558 | 0.04380197 | 19.8845244  | 8.826434516  | Up   | 0.000587 | 0.00091802 | AAEL000684-PA OS=Aedes aegypti GN=AAEL006884 PE=4 SV=1            |
| CCG025254.1 | 1651 | 43   | 558 | 1.11913906 | 11.81509294 | 3.400169761  | Up   | 8.46E-14 | 2.70E-13   | AAEL007471-PA OS=Aedes aegypti GN=AAEL007471 PE=4 SV=1            |
| CCG027946.1 | 1274 | 80   | 558 | 2.69825649 | 15.31139595 | 2.504506421  | Up   | 0        | 0          | AAEL009611-PA OS=Aedes aegypti GN=AAEL009611 PE=4 SV=1            |
| CCG020967.1 | 2214 | 131  | 558 | 2.54247301 | 8.810622601 | 1.793011514  | Up   | 1.26E-13 | 3.87E-13   | AAEL009383-PA OS=Aedes aegypti GN=AAEL009383 PE=4 SV=1            |
| CCG017047.1 | 660  | 147  | 558 | 9.5705318  | 29.555634   | 1.626762171  | Up   | 7.02E-14 | 2.28E-13   | AAEL008800-PA OS=Aedes aegypti GN=AAEL008800 PE=4 SV=1            |
| CCG011966.1 | 2853 | 958  | 558 | 14.4286736 | 6.837265489 | -1.07744733  | Down | 1.39E-46 | 6.42E-46   | AAEL003076-PA OS=Aedes aegypti GN=AAEL003076 PE=4 SV=1            |
| CCG008834.1 | 621  | 92   | 559 | 6.36588661 | 31.46807845 | 2.305455721  | Up   | 1.44E-14 | 5.12E-14   | AAEL013778-PA OS=Aedes aegypti GN=AAEL013778 PE=4 SV=1            |

|             |      |     |     |            |             |             |    |          |            |                                                                                  |
|-------------|------|-----|-----|------------|-------------|-------------|----|----------|------------|----------------------------------------------------------------------------------|
| CCG012450.2 | 1841 | 119 | 559 | 2.77751136 | 10.61470761 | 1.934199913 | Up | 0        | 0          | AAEL011904-PA OS=Aedes aegypti GN=AAEL011904 PE=4 SV=1                           |
| CCG005859.1 | 495  | 125 | 559 | 10.8509431 | 39.47813478 | 1.863233392 | Up | 2.35E-14 | 8.22E-14   | AAEL009276-PA OS=Aedes aegypti GN=AAEL009276 PE=4 SV=1                           |
| CCG017162.1 | 1356 | 136 | 559 | 4.3096489  | 14.41126601 | 1.741554835 | Up | 1.70E-13 | 4.99E-13   | AAEL000477-PA OS=Aedes aegypti GN=AAEL000477 PE=4 SV=1                           |
| CCG004549.1 | 657  | 161 | 559 | 10.5298741 | 29.74380018 | 1.498100799 | Up | 0        | 0          | AAEL011720-PA OS=Aedes aegypti GN=AAEL011720 PE=4 SV=1                           |
| CCG003191.1 | 2058 | 23  | 560 | 0.48022541 | 9.512456265 | 4.308034265 | Up | 4.01E-11 | 8.68E-11   | AAEL000952-PA OS=Aedes aegypti GN=AAEL000952 PE=4 SV=1                           |
| CCG009836.1 | 2963 | 48  | 560 | 0.696101   | 6.607031722 | 3.24663372  | Up | 5.35E-14 | 1.79E-13   | Zinc finger protein 557 OS=Culex quinquefasciatus GN=CpipJ_CPIJ014708 PE=4 SV=1  |
| CCG026677.1 | 2189 | 57  | 560 | 1.11890127 | 8.943186383 | 2.998706207 | Up | 0        | 0          | AAEL003949-PA OS=Aedes aegypti GN=AAEL003949 PE=4 SV=1                           |
| CCG021613.1 | 1935 | 62  | 560 | 1.37680803 | 10.11712403 | 2.87739991  | Up | 0        | 0          | AAEL002366-PA OS=Aedes aegypti GN=AAEL002366 PE=4 SV=1                           |
| CCG013809.1 | 1023 | 140 | 560 | 5.88051109 | 19.13649559 | 1.702313204 | Up | 0        | 0          | Putative arsenite-translocating ATPase OS=Glossina morsitans morsitans PE=2 SV=1 |
| CCG009389.1 | 2649 | 178 | 560 | 2.88735854 | 7.390198185 | 1.35586279  | Up | 1.15E-13 | 3.58E-13   | AAEL008583-PA OS=Aedes aegypti GN=AAEL008583 PE=4 SV=1                           |
| CCG013408.2 | 1446 | 215 | 560 | 6.38899927 | 13.5384751  | 1.083403371 | Up | 0        | 0          | AAEL004553-PA OS=Aedes aegypti GN=AAEL004553 PE=4 SV=1                           |
| CCG019110.1 | 794  | 3   | 561 | 0.16235416 | 24.69973963 | 7.249207664 | Up | 5.28E-05 | 8.85E-05   | -                                                                                |
| CCG007408.1 | 1441 | 62  | 561 | 1.84880191 | 13.6097108  | 2.879973854 | Up | 0        | 0          | AAEL004053-PA OS=Aedes aegypti GN=AAEL004053 PE=4 SV=1                           |
| CCG020738.1 | 846  | 1   | 562 | 0.05079165 | 23.22287417 | 8.836739524 | Up | 0.000587 | 0.00091808 | AAEL010318-PA OS=Aedes aegypti GN=AAEL010318 PE=2 SV=1                           |
| CCG002106.1 | 2081 | 51  | 562 | 1.05307855 | 9.440918571 | 3.164314182 | Up | 0        | 0          | AAEL003176-PA OS=Aedes aegypti GN=AAEL003176 PE=4 SV=1                           |
| CCG019114.1 | 351  | 57  | 562 | 6.97799109 | 55.97308133 | 3.00384951  | Up | 0        | 0          | -                                                                                |
| CCG014757.1 | 1881 | 21  | 563 | 0.4797259  | 10.46332261 | 4.446986893 | Up | 1.76E-10 | 3.73E-10   | AAEL002647-PA OS=Aedes aegypti GN=AAEL002647 PE=4 SV=1                           |

|             |      |      |     |            |             |              |      |          |          |                                                                                       |
|-------------|------|------|-----|------------|-------------|--------------|------|----------|----------|---------------------------------------------------------------------------------------|
| CCG004224.1 | 913  | 33   | 563 | 1.55312294 | 21.55696585 | 3.794910197  | Up   | 1.31E-13 | 4.02E-13 | AAEL011866-PA OS=Aedes aegypti GN=AAEL011866 PE=4 SV=1                                |
| CCG019242.1 | 570  | 45   | 564 | 3.39234747 | 34.59029491 | 3.35001146   | Up   | 0        | 0        | AAEL001399-PA OS=Aedes aegypti GN=AAEL001399 PE=4 SV=1                                |
| CCG007619.1 | 3681 | 95   | 564 | 1.10897169 | 5.356280386 | 2.272008948  | Up   | 0        | 0        | AAEL010370-PA OS=Aedes aegypti GN=AAEL010370 PE=4 SV=1                                |
| CCG001919.1 | 2024 | 96   | 564 | 2.03809018 | 9.741337994 | 2.256902055  | Up   | 0        | 0        | AAEL001585-PA (Fragment) OS=Aedes aegypti GN=AAEL001585 PE=4 SV=1                     |
| CCG012044.1 | 3528 | 100  | 564 | 1.217963   | 5.588568055 | 2.198008366  | Up   | 0        | 0        | AAEL003089-PA OS=Aedes aegypti GN=AAEL003089 PE=4 SV=1                                |
| CCG019901.1 | 1611 | 120  | 564 | 3.20072511 | 12.23865183 | 1.934973961  | Up   | 0        | 0        | AAEL002384-PA OS=Aedes aegypti GN=AAEL002384 PE=4 SV=1                                |
| CCG003022.1 | 3426 | 153  | 564 | 1.91896363 | 5.754952744 | 1.584476714  | Up   | 0        | 0        | AAEL010796-PA OS=Aedes aegypti GN=AAEL010796 PE=4 SV=1                                |
| CCG021821.1 | 2923 | 187  | 564 | 2.74900457 | 6.745285015 | 1.294970096  | Up   | 3.31E-13 | 9.03E-13 | AAEL005892-PA OS=Aedes aegypti GN=AAEL005892 PE=4 SV=1                                |
| CCG023499.1 | 609  | 38   | 565 | 2.68119855 | 32.43255563 | 3.596492748  | Up   | 4.26E-14 | 1.45E-13 | AAEL005216-PA OS=Aedes aegypti GN=AAEL005216 PE=3 SV=1                                |
| CCG003018.1 | 1871 | 62   | 565 | 1.42390355 | 10.55661485 | 2.890223951  | Up   | 0        | 0        | AAEL010005-PA OS=Aedes aegypti GN=AAEL010005 PE=4 SV=1                                |
| CCG006865.4 | 1107 | 2735 | 565 | 106.162804 | 17.84230025 | -2.572904857 | Down | 0        | 0        | AAEL007874-PA OS=Aedes aegypti GN=AAEL007874 PE=4 SV=1                                |
| CCG009141.1 | 6516 | 37   | 566 | 0.24399634 | 3.036584508 | 3.637518081  | Up   | 5.17E-14 | 1.74E-13 | DNA polymerase OS=Aedes aegypti GN=AAEL002800 PE=3 SV=1                               |
| CCG020941.1 | 568  | 42   | 566 | 3.17733953 | 34.83518425 | 3.454654024  | Up   | 7.66E-14 | 2.47E-13 | AAEL008910-PA OS=Aedes aegypti GN=AAEL008910 PE=4 SV=1                                |
| CCG004504.1 | 1303 | 56   | 566 | 1.84674224 | 15.185253   | 3.039616525  | Up   | 0        | 0        | Integrator complex subunit 12 OS=Culex quinquefasciatus GN=CpipJ_CPIJ008030 PE=4 SV=1 |
| CCG008008.1 | 447  | 95   | 566 | 9.13227022 | 44.26484262 | 2.277115838  | Up   | 0        | 0        | AAEL003412-PA OS=Aedes aegypti GN=AAEL003412 PE=4 SV=1                                |
| CCG012885.1 | 1105 | 133  | 566 | 5.17192281 | 17.90623046 | 1.791689011  | Up   | 9.90E-14 | 3.11E-13 | AAEL009501-PA OS=Aedes aegypti GN=AAEL009501 PE=3 SV=1                                |

|             |      |      |     |            |             |              |      |           |           |                                                                                |
|-------------|------|------|-----|------------|-------------|--------------|------|-----------|-----------|--------------------------------------------------------------------------------|
| CCG016108.1 | 780  | 2162 | 566 | 119.10329  | 25.36715981 | -2.231179361 | Down | 2.23E-296 | 1.40E-295 | AAEL014366-PA OS=Aedes aegypti GN=AAEL014366 PE=4 SV=1                         |
| CCG007300.1 | 271  | 20   | 567 | 3.17119813 | 73.14148683 | 4.527590034  | Up   | 3.69E-10  | 7.71E-10  | AAEL005428-PA OS=Aedes aegypti GN=AAEL005428 PE=4 SV=1                         |
| CCG021720.1 | 594  | 82   | 567 | 5.93184889 | 33.36926419 | 2.491966124  | Up   | 0         | 0         | -                                                                              |
| CCG011773.1 | 934  | 133  | 567 | 6.1188166  | 21.22199457 | 1.794235693  | Up   | 9.90E-14  | 3.11E-13  | AAEL002374-PA OS=Aedes aegypti GN=AAEL002374 PE=4 SV=1                         |
| CCG026146.1 | 2210 | 158  | 567 | 3.07204437 | 8.968933452 | 1.545737381  | Up   | 0         | 0         | AAEL009512-PA OS=Aedes aegypti GN=AAEL009512 PE=4 SV=1                         |
| CCG002236.1 | 4092 | 161  | 567 | 1.69064694 | 4.843925447 | 1.518601251  | Up   | 0         | 0         | Num1-associated kinase OS=Culex quinquefasciatus GN=CpipJ_CPIJ004075 PE=4 SV=1 |
| CCG021752.1 | 993  | 175  | 567 | 7.57271254 | 19.96107042 | 1.398307017  | Up   | 3.55E-13  | 9.58E-13  | AAEL003230-PA OS=Aedes aegypti GN=AAEL003230 PE=4 SV=1                         |
| CCG018477.1 | 2001 | 1133 | 567 | 24.3301896 | 9.905718606 | -1.296414017 | Down | 4.70E-73  | 2.35E-72  | AAEL007153-PA OS=Aedes aegypti GN=AAEL007153 PE=4 SV=1                         |
| CCG028062.1 | 1803 | 12   | 568 | 0.28598825 | 11.01292358 | 5.267097823  | Up   | 1.30E-07  | 2.49E-07  | AAEL000904-PA (Fragment) OS=Aedes aegypti GN=AAEL000904 PE=4 SV=1              |
| CCG014882.1 | 1583 | 89   | 568 | 2.41586    | 12.54346254 | 2.376326892  | Up   | 0         | 0         | AAEL011765-PA OS=Aedes aegypti GN=AAEL011765 PE=4 SV=1                         |
| CCG023184.1 | 1031 | 102  | 568 | 4.25112796 | 19.25926402 | 2.179634981  | Up   | 0         | 0         | AAEL013998-PA OS=Aedes aegypti GN=AAEL013998 PE=4 SV=1                         |
| CCG008695.1 | 1083 | 116  | 568 | 4.60248312 | 18.33453482 | 1.994079328  | Up   | 1.16E-13  | 3.59E-13  | AAEL009916-PA OS=Aedes aegypti GN=AAEL009916 PE=4 SV=1                         |
| CCG003353.1 | 1238 | 193  | 568 | 6.69883585 | 16.03901551 | 1.259603286  | Up   | 6.08E-14  | 2.02E-13  | AAEL005573-PA OS=Aedes aegypti GN=AAEL005573 PE=4 SV=1                         |
| CCG001079.1 | 603  | 1050 | 568 | 74.822921  | 32.9291894  | -1.184113289 | Down | 5.26E-59  | 2.52E-58  | AAEL008054-PA OS=Aedes aegypti GN=AAEL008054 PE=4 SV=1                         |
| CCG019729.1 | 847  | 29   | 569 | 1.47121878 | 23.48436775 | 3.996617051  | Up   | 6.66E-13  | 1.69E-12  | AAEL010667-PA OS=Aedes aegypti GN=AAEL010667 PE=3 SV=1                         |
| CCG004879.1 | 484  | 144  | 569 | 12.7843839 | 41.09764356 | 1.684673045  | Up   | 7.53E-14  | 2.43E-13  | AAEL005841-PA OS=Aedes aegypti GN=AAEL005841 PE=4 SV=1                         |
| CCG025115.1 | 1515 | 197  | 569 | 5.58748364 | 13.12954421 | 1.232546227  | Up   | 0         | 0         | AAEL003471-PA OS=Aedes aegypti GN=AAEL003471 PE=4 SV=1                         |

|             |      |      |     |            |             |              |      |          |          |                                                                                           |
|-------------|------|------|-----|------------|-------------|--------------|------|----------|----------|-------------------------------------------------------------------------------------------|
| CCG023825.1 | 1019 | 989  | 569 | 41.7046786 | 19.52037241 | -1.095228665 | Down | 2.74E-49 | 1.28E-48 | AAEL001403-PA OS=Aedes aegypti GN=AAEL001403 PE=4 SV=1                                    |
| CCG009450.1 | 1510 | 1252 | 569 | 35.6278859 | 13.17301953 | -1.435420801 | Down | 6.38E-94 | 3.34E-93 | AAEL007410-PA OS=Aedes aegypti GN=AAEL007410 PE=4 SV=1                                    |
| CCG003391.1 | 975  | 101  | 570 | 4.45122379 | 20.43714642 | 2.19891983   | Up   | 0        | 0        | AAEL014649-PA OS=Aedes aegypti GN=AAEL014649 PE=4 SV=1                                    |
| CCG003667.2 | 1146 | 120  | 570 | 4.49944865 | 17.38762457 | 1.950240717  | Up   | 0        | 0        | AAEL000204-PA OS=Aedes aegypti GN=AAEL000204 PE=4 SV=1                                    |
| CCG022653.1 | 2313 | 167  | 570 | 3.10244085 | 8.614880138 | 1.47342702   | Up   | 1.62E-13 | 4.78E-13 | AAEL007980-PA OS=Aedes aegypti GN=AAEL007980 PE=4 SV=1                                    |
| CCG018862.1 | 1743 | 186  | 570 | 4.58541058 | 11.4321387  | 1.317972502  | Up   | 6.43E-13 | 1.64E-12 | AAEL011872-PA OS=Aedes aegypti GN=AAEL011872 PE=4 SV=1                                    |
| CCG019412.1 | 732  | 3231 | 570 | 189.665591 | 27.22160896 | -2.800633722 | Down | 0        | 0        | -                                                                                         |
| CCG014542.1 | 2733 | 6    | 571 | 0.09433531 | 7.303759984 | 6.274697638  | Up   | 8.38E-06 | 1.48E-05 | AAEL009787-PA OS=Aedes aegypti GN=AAEL009787 PE=4 SV=1                                    |
| CCG004560.1 | 604  | 23   | 571 | 1.63626473 | 33.0483047  | 4.336098183  | Up   | 4.01E-11 | 8.68E-11 | Uncharacterized protein (Fragment) OS=Monodelphis domestica PE=4 SV=1                     |
| CCG000835.1 | 4443 | 86   | 571 | 0.83173468 | 4.492724744 | 2.433395384  | Up   | 0        | 0        | Chromatin regulatory protein sir2 OS=Culex quinquefasciatus GN=CpipJ_CPIJ006726 PE=4 SV=1 |
| CCG020808.1 | 1530 | 110  | 571 | 3.08932732 | 13.04652029 | 2.078300426  | Up   | 0        | 0        | AAEL001190-PA OS=Aedes aegypti GN=AAEL001190 PE=4 SV=1                                    |
| CCG019514.1 | 1785 | 115  | 571 | 2.76835825 | 11.18273167 | 2.014170088  | Up   | 6.13E-14 | 2.03E-13 | AAEL013355-PA OS=Aedes aegypti GN=AAEL013355 PE=4 SV=1                                    |
| CCG015863.1 | 1052 | 127  | 571 | 5.18741093 | 18.97450194 | 1.870975452  | Up   | 1.57E-13 | 4.67E-13 | AAEL007647-PA OS=Aedes aegypti GN=AAEL007647 PE=4 SV=1                                    |
| CCG023088.1 | 3078 | 204  | 571 | 2.84789664 | 6.485112423 | 1.187234797  | Up   | 6.59E-14 | 2.17E-13 | AAEL014815-PA (Fragment) OS=Aedes aegypti GN=AAEL014815 PE=4 SV=1                         |
| CCG018522.1 | 1862 | 206  | 571 | 4.7539019  | 10.72028788 | 1.173159612  | Up   | 1.10E-13 | 3.43E-13 | AAEL004538-PA OS=Aedes aegypti GN=AAEL004538 PE=3 SV=1                                    |
| CCG003758.1 | 2385 | 1142 | 571 | 20.575026  | 8.369465844 | -1.297686796 | Down | 9.92E-74 | 4.97E-73 | AAEL003413-PA OS=Aedes aegypti GN=AAEL003413 PE=4 SV=1                                    |

|             |      |      |     |            |             |              |      |          |            |                                                                                          |
|-------------|------|------|-----|------------|-------------|--------------|------|----------|------------|------------------------------------------------------------------------------------------|
| CCG025893.1 | 915  | 0    | 572 | 0.001      | 21.8536987  | 14.41558985  | Up   | 4.44E-16 | 1.64E-15   | AAEL010638-PA OS=Aedes aegypti GN=AAEL010638 PE=3 SV=1                                   |
| CCG019129.1 | 753  | 6    | 572 | 0.34238832 | 26.55529125 | 6.27722204   | Up   | 8.38E-06 | 1.48E-05   | AAEL009962-PA OS=Aedes aegypti GN=AAEL009962 PE=4 SV=1                                   |
| CCG009602.1 | 1174 | 37   | 572 | 1.35424206 | 17.03248238 | 3.652731175  | Up   | 5.17E-14 | 1.74E-13   | AAEL005592-PA OS=Aedes aegypti GN=AAEL005592 PE=4 SV=1                                   |
| CCG017681.1 | 2187 | 59   | 572 | 1.15922009 | 9.143179842 | 2.979541491  | Up   | 0        | 0          | Condensin complex subunit 2 OS=Aedes aegypti GN=AAEL005962 PE=3 SV=1                     |
| CCG018433.1 | 1530 | 61   | 572 | 1.71317243 | 13.06936883 | 2.931447203  | Up   | 1.75E-14 | 6.17E-14   | Zinc finger protein 8 OS=Culex quinquefasciatus GN=CpipJ_CPIJ012305 PE=4 SV=1            |
| CCG004049.1 | 1254 | 80   | 572 | 2.74129088 | 15.94588063 | 2.540256446  | Up   | 0        | 0          | AAEL009429-PA (Fragment) OS=Aedes aegypti GN=AAEL009429 PE=4 SV=1                        |
| CCG000805.1 | 945  | 131  | 572 | 5.95665104 | 21.15993049 | 1.828761539  | Up   | 1.26E-13 | 3.87E-13   | Putative uncharacterized protein OS=Culex quinquefasciatus GN=CpipJ_CPIJ003895 PE=4 SV=1 |
| CCG003317.1 | 2070 | 133  | 572 | 2.76085734 | 9.659968268 | 1.806902105  | Up   | 9.90E-14 | 3.11E-13   | AAEL002563-PA OS=Aedes aegypti GN=AAEL002563 PE=4 SV=1                                   |
| CCG025489.1 | 531  | 182  | 572 | 14.7278563 | 37.65750342 | 1.3543899    | Up   | 0        | 0          | AAEL000825-PA OS=Aedes aegypti GN=AAEL000825 PE=4 SV=1                                   |
| CCG012486.1 | 1131 | 193  | 572 | 7.33258955 | 17.68004802 | 1.269727503  | Up   | 6.08E-14 | 2.02E-13   | AAEL008408-PA OS=Aedes aegypti GN=AAEL008408 PE=4 SV=1                                   |
| CCG027211.1 | 4743 | 2539 | 572 | 23.0023521 | 4.21592543  | -2.447860139 | Down | 0        | 0          | AAEL005416-PA OS=Aedes aegypti GN=AAEL005416 PE=4 SV=1                                   |
| CCG021973.1 | 5703 | 8774 | 572 | 66.1084432 | 3.506248345 | -4.23683445  | Down | 0        | 0          | Uncharacterized protein OS=Culex quinquefasciatus GN=CpipJ_CPIJ019410 PE=4 SV=1          |
| CCG018500.1 | 742  | 2    | 573 | 0.11582139 | 26.99608166 | 7.864704533  | Up   | 9.36E-05 | 0.00015376 | AAEL005916-PA OS=Aedes aegypti GN=AAEL005916 PE=4 SV=1                                   |
| CCG000059.1 | 2352 | 72   | 573 | 1.31540004 | 8.516620999 | 2.694779531  | Up   | 0        | 0          | Uncharacterized protein OS=Anopheles darlingi GN=AND_20768 PE=4 SV=1                     |

|             |      |      |     |            |             |              |      |           |           |                                                                                                   |
|-------------|------|------|-----|------------|-------------|--------------|------|-----------|-----------|---------------------------------------------------------------------------------------------------|
| CCG000754.1 | 3159 | 116  | 573 | 1.57786933 | 6.340959984 | 2.006723537  | Up   | 1.16E-13  | 3.59E-13  | AAEL013736-PA (Fragment)<br>OS=Aedes aegypti<br>GN=AAEL013736 PE=4 SV=1                           |
| CCG010846.1 | 1305 | 122  | 573 | 4.01709396 | 15.34949624 | 1.933967195  | Up   | 8.04E-14  | 2.58E-13  | Polyadenylate-binding protein-like<br>protein OS=Aedes aegypti PE=2<br>SV=1                       |
| CCG006824.1 | 2672 | 123  | 573 | 1.97802296 | 7.496666389 | 1.922190027  | Up   | 0         | 0         | AAEL002998-PA OS=Aedes<br>aegypti GN=AAEL002998 PE=4<br>SV=1                                      |
| CCG014825.1 | 1932 | 193  | 573 | 4.29252525 | 10.36806035 | 1.272247495  | Up   | 6.08E-14  | 2.02E-13  | AAEL010246-PA OS=Aedes<br>aegypti GN=AAEL010246 PE=4<br>SV=1                                      |
| CCG020642.1 | 1043 | 33   | 574 | 1.35954098 | 19.23878319 | 3.822826011  | Up   | 1.31E-13  | 4.01E-13  | AAEL011383-PA OS=Aedes<br>aegypti GN=AAEL011383 PE=4<br>SV=1                                      |
| CCG003785.1 | 1715 | 50   | 574 | 1.25276194 | 11.70032121 | 3.223363941  | Up   | 0         | 0         | AAEL010013-PA OS=Aedes<br>aegypti GN=AAEL010013 PE=4<br>SV=1                                      |
| CCG006498.2 | 3589 | 72   | 574 | 0.86202867 | 5.590986589 | 2.697295129  | Up   | 0         | 0         | Putative uncharacterized protein<br>OS=Culex quinquefasciatus<br>GN=CpipJ_CPIJ006312 PE=4<br>SV=1 |
| CCG017467.1 | 1544 | 111  | 574 | 3.08914543 | 12.99614693 | 2.072804264  | Up   | 0         | 0         | AAEL009476-PA OS=Aedes<br>aegypti GN=AAEL009476 PE=4<br>SV=1                                      |
| CCG013995.1 | 1428 | 123  | 574 | 3.70117462 | 14.05185635 | 1.924705625  | Up   | 0         | 0         | AAEL003762-PA OS=Aedes<br>aegypti GN=AAEL003762 PE=4<br>SV=1                                      |
| CCG027340.1 | 1710 | 206  | 574 | 5.17647095 | 11.73453267 | 1.180719603  | Up   | 1.10E-13  | 3.43E-13  | AAEL002837-PA OS=Aedes<br>aegypti GN=AAEL002837 PE=4<br>SV=1                                      |
| CCG009123.1 | 1149 | 70   | 575 | 2.61782543 | 17.49435087 | 2.740448333  | Up   | 0         | 0         | AAEL003124-PA OS=Aedes<br>aegypti GN=AAEL003124 PE=4<br>SV=1                                      |
| CCG020229.1 | 396  | 92   | 575 | 9.98286764 | 50.7601241  | 2.346169394  | Up   | 1.44E-14  | 5.11E-14  | AAEL000435-PA OS=Aedes<br>aegypti GN=AAEL000435 PE=4<br>SV=1                                      |
| CCG014500.1 | 1020 | 139  | 575 | 5.85567952 | 19.70687171 | 1.750790277  | Up   | 1.46E-13  | 4.37E-13  | AAEL006342-PA OS=Aedes<br>aegypti GN=AAEL006342 PE=4<br>SV=1                                      |
| CCG027655.1 | 1961 | 146  | 575 | 3.19917453 | 10.25038712 | 1.679906791  | Up   | 9.33E-15  | 3.34E-14  | AAEL013208-PA OS=Aedes<br>aegypti GN=AAEL013208 PE=4<br>SV=1                                      |
| CCG007432.1 | 2981 | 1481 | 575 | 21.3479292 | 6.743042316 | -1.662624576 | Down | 2.95E-137 | 1.66E-136 | AAEL004090-PA (Fragment)<br>OS=Aedes aegypti<br>GN=AAEL004090 PE=4 SV=1                           |

|             |      |      |     |            |             |              |      |          |          |                                                                                       |
|-------------|------|------|-----|------------|-------------|--------------|------|----------|----------|---------------------------------------------------------------------------------------|
| CCG011095.1 | 1690 | 49   | 576 | 1.24586804 | 11.91477362 | 3.257528361  | Up   | 0        | 0        | AAEL005202-PA OS=Reedes<br>aegypti GN=AAEL005202 PE=4<br>SV=1                         |
| CCG020661.1 | 1793 | 70   | 576 | 1.67756911 | 11.23032204 | 2.742955188  | Up   | 0        | 0        | AGAP009012-PA OS=Anopheles<br>gambiae GN=AGAP009012 PE=4<br>SV=4                      |
| CCG019538.3 | 2271 | 83   | 576 | 1.57044825 | 8.866564254 | 2.497198774  | Up   | 1.32E-13 | 4.02E-13 | AAEL008721-PA OS=Reedes<br>aegypti GN=AAEL008721 PE=4<br>SV=1                         |
| CCG013626.1 | 900  | 96   | 576 | 4.58343836 | 22.37329713 | 2.287275705  | Up   | 0        | 0        | AAEL005851-PA OS=Reedes<br>aegypti GN=AAEL005851 PE=4<br>SV=1                         |
| CCG017239.2 | 1617 | 98   | 576 | 2.60422634 | 12.45267002 | 2.257528361  | Up   | 0        | 0        | AAEL001212-PA OS=Reedes<br>aegypti GN=AAEL001212 PE=4<br>SV=1                         |
| CCG007687.1 | 2962 | 147  | 576 | 2.13252903 | 6.798098387 | 1.67256586   | Up   | 7.02E-14 | 2.29E-13 | AAEL011415-PA OS=Reedes<br>aegypti GN=AAEL011415 PE=4<br>SV=1                         |
| CCG022319.1 | 1554 | 69   | 577 | 1.90792258 | 12.98000367 | 2.766216256  | Up   | 0        | 0        | AAEL003899-PA OS=Reedes<br>aegypti GN=AAEL003899 PE=4<br>SV=1                         |
| CCG023774.1 | 1386 | 119  | 577 | 3.68932065 | 14.55333744 | 1.979922949  | Up   | 0        | 0        | AAEL001638-PA OS=Reedes<br>aegypti GN=AAEL001638 PE=4<br>SV=1                         |
| CCG015493.1 | 477  | 6680 | 577 | 601.756451 | 42.28705597 | -3.830891675 | Down | 0        | 0        | AAEL005768-PA OS=Reedes<br>aegypti GN=AAEL005768 PE=4<br>SV=1                         |
| CCG005908.1 | 570  | 44   | 578 | 3.31696197 | 35.44891925 | 3.417807268  | Up   | 3.91E-14 | 1.34E-13 | AAEL010085-PA OS=Reedes<br>aegypti GN=AAEL010085 PE=4<br>SV=1                         |
| CCG017276.1 | 965  | 173  | 578 | 7.70338247 | 20.93873987 | 1.442610659  | Up   | 3.60E-13 | 9.69E-13 | AAEL010964-PA OS=Reedes<br>aegypti GN=AAEL010964 PE=4<br>SV=1                         |
| CCG011302.1 | 1584 | 228  | 578 | 6.18503756 | 12.75623988 | 1.044348872  | Up   | 1.05E-13 | 3.28E-13 | AAEL010938-PA OS=Reedes<br>aegypti GN=AAEL010938 PE=4<br>SV=1                         |
| CCG018229.1 | 773  | 9772 | 578 | 543.208598 | 26.1395653  | -4.377199262 | Down | 0        | 0        | Myosin light chain 2 OS=Culex<br>quinquefasciatus<br>GN=CpipJ_CPIJ017123 PE=4<br>SV=1 |
| CCG020636.1 | 1203 | 65   | 579 | 2.32172298 | 16.82530528 | 2.857364929  | Up   | 0        | 0        | AAEL001407-PA OS=Reedes<br>aegypti GN=AAEL001407 PE=4<br>SV=1                         |
| CCG026191.1 | 1278 | 75   | 579 | 2.52169804 | 15.83790473 | 2.650914051  | Up   | 0        | 0        | AAEL014105-PA OS=Reedes<br>aegypti GN=AAEL014105 PE=4<br>SV=1                         |
| CCG004895.1 | 2895 | 128  | 579 | 1.89987082 | 6.991655354 | 1.879732742  | Up   | 4.15E-14 | 1.42E-13 | AAEL011693-PA OS=Reedes<br>aegypti GN=AAEL011693 PE=3<br>SV=1                         |



|             |      |      |     |            |             |              |      |           |           |                                                                             |
|-------------|------|------|-----|------------|-------------|--------------|------|-----------|-----------|-----------------------------------------------------------------------------|
| CCG010339.1 | 2838 | 159  | 579 | 2.40739528 | 7.132079722 | 1.566849787  | Up   | 5.53E-14  | 1.84E-13  | AAEL003865-PA OS=Aedes aegypti GN=AAEL003865 PE=4 SV=1                      |
| CCG014586.1 | 2902 | 1412 | 579 | 20.9073967 | 6.974790576 | -1.583791631 | Down | 3.95E-122 | 2.17E-121 | AAEL009937-PA OS=Aedes aegypti GN=AAEL009937 PE=4 SV=1                      |
| CCG009828.1 | 1398 | 39   | 580 | 1.1987265  | 14.50343385 | 3.596820075  | Up   | 7.33E-14  | 2.38E-13  | AAEL014400-PA OS=Aedes aegypti GN=AAEL014400 PE=4 SV=1                      |
| CCG007386.1 | 1602 | 53   | 580 | 1.42159546 | 12.65655464 | 3.154301839  | Up   | 0         | 0         | AAEL007654-PA OS=Aedes aegypti GN=AAEL007654 PE=4 SV=1                      |
| CCG004213.1 | 872  | 56   | 580 | 2.75952424 | 23.25206483 | 3.074867372  | Up   | 0         | 0         | AAEL000110-PA OS=Aedes aegypti GN=AAEL000110 PE=4 SV=1                      |
| CCG017094.1 | 1215 | 183  | 580 | 6.47198472 | 16.68790167 | 1.366522456  | Up   | 3.05E-13  | 8.41E-13  | AAEL003346-PA OS=Aedes aegypti GN=AAEL003346 PE=4 SV=1                      |
| CCG009370.1 | 1860 | 209  | 580 | 4.82831964 | 10.90096803 | 1.174863162  | Up   | 0         | 0         | AAEL007248-PA OS=Aedes aegypti GN=AAEL007248 PE=4 SV=1                      |
| CCG005175.1 | 546  | 227  | 580 | 17.8647065 | 37.1351658  | 1.055673807  | Up   | 0         | 0         | AAEL008710-PA OS=Aedes aegypti GN=AAEL008710 PE=4 SV=1                      |
| CCG023424.1 | 4922 | 1171 | 580 | 10.2229905 | 4.119423106 | -1.311303067 | Down | 9.09E-77  | 4.58E-76  | -                                                                           |
| CCG016266.1 | 1248 | 1609 | 580 | 55.3992812 | 16.24663504 | -1.769726317 | Down | 1.18E-162 | 6.82E-162 | AAEL007128-PA OS=Aedes aegypti GN=AAEL007128 PE=4 SV=1                      |
| CCG027473.1 | 4486 | 61   | 581 | 0.58429644 | 4.527587785 | 2.95397022   | Up   | 1.75E-14  | 6.18E-14  | AAEL008475-PA OS=Aedes aegypti GN=AAEL008475 PE=4 SV=1                      |
| CCG016033.1 | 1319 | 117  | 581 | 3.81156857 | 15.3986041  | 2.014342838  | Up   | 9.44E-14  | 2.97E-13  | AAEL002069-PA OS=Aedes aegypti GN=AAEL002069 PE=4 SV=1                      |
| CCG023373.1 | 1800 | 153  | 581 | 3.65242744 | 11.28375489 | 1.627319715  | Up   | 0         | 0         | AAEL010598-PA OS=Aedes aegypti GN=AAEL010598 PE=4 SV=1                      |
| CCG006149.1 | 2013 | 83   | 582 | 1.77172776 | 10.10716199 | 2.512149115  | Up   | 1.32E-13  | 4.01E-13  | AAEL002013-PA OS=Aedes aegypti GN=AAEL002013 PE=4 SV=1                      |
| CCG015581.1 | 1720 | 101  | 582 | 2.52322279 | 11.82890528 | 2.228977064  | Up   | 0         | 0         | AAEL005677-PA OS=Aedes aegypti GN=AAEL005677 PE=4 SV=1                      |
| CCG003531.1 | 1114 | 152  | 582 | 5.86301585 | 18.26365986 | 1.639261033  | Up   | 8.39E-14  | 2.69E-13  | SNARE_virga_protein OS=Culex quinquefasciatus GN=CpipJ_CPIJ007069 PE=4 SV=1 |
| CCG016959.1 | 1524 | 1067 | 582 | 30.0844533 | 13.35020806 | -1.172155914 | Down | 5.42E-59  | 2.60E-58  | AAEL004496-PA OS=Aedes aegypti GN=AAEL004496 PE=4 SV=1                      |

|             |      |      |     |            |             |              |      |           |           |                                                                                          |
|-------------|------|------|-----|------------|-------------|--------------|------|-----------|-----------|------------------------------------------------------------------------------------------|
| CCG011262.1 | 4161 | 1512 | 582 | 15.6140925 | 4.889621985 | -1.675053877 | Down | 1.40E-141 | 7.87E-141 | AAEL008242-PA OS=Aedes aegypti GN=AAEL008242 PE=4 SV=1                                   |
| CCG014767.1 | 3140 | 62   | 583 | 0.84844699 | 6.490660942 | 2.935468967  | Up   | 0         | 0         | Tetracycline resistance OS=Culex quinquefasciatus GN=CpipJ_CPIJ003321 PE=4 SV=1          |
| CCG016129.1 | 2189 | 153  | 583 | 3.00336656 | 9.310495824 | 1.632277434  | Up   | 0         | 0         | AAEL006795-PA OS=Aedes aegypti GN=CYP9J15 PE=3 SV=2                                      |
| CCG020347.1 | 1539 | 160  | 583 | 4.46728885 | 13.242804   | 1.567737182  | Up   | 4.24E-14  | 1.44E-13  | Putative uncharacterized protein OS=Culex quinquefasciatus GN=CpipJ_CPIJ009391 PE=4 SV=1 |
| CCG024265.1 | 732  | 213  | 583 | 12.5034883 | 27.84245268 | 1.154955657  | Up   | 3.57E-13  | 9.59E-13  | AAEL008801-PA OS=Aedes aegypti GN=AAEL008801 PE=4 SV=1                                   |
| CCG010246.1 | 1158 | 9    | 584 | 0.33396167 | 17.63008086 | 5.722212761  | Up   | 1.09E-06  | 2.01E-06  | AAEL000828-PA OS=Aedes aegypti GN=AAEL000828 PE=3 SV=1                                   |
| CCG008559.1 | 490  | 0    | 585 | 0.001      | 41.73590186 | 15.34900133  | Up   | 4.44E-16  | 1.63E-15  | Predicted protein OS=Nematostella vectensis GN=v1g229551 PE=3 SV=1                       |
| CCG021583.1 | 1989 | 38   | 585 | 0.82094013 | 10.28184611 | 3.646678505  | Up   | 4.26E-14  | 1.45E-13  | Actin OS=Culex quinquefasciatus GN=CpipJ_CPIJ003226 PE=3 SV=1                            |
| CCG021053.1 | 1632 | 89   | 585 | 2.34332499 | 12.53099995 | 2.418872587  | Up   | 0         | 0         | AAEL005019-PA OS=Aedes aegypti GN=AAEL005019 PE=4 SV=1                                   |
| CCG010831.1 | 1872 | 137  | 585 | 3.14468677 | 10.92446149 | 1.796573935  | Up   | 2.90E-13  | 8.03E-13  | AAEL001282-PA OS=Aedes aegypti GN=AAEL001282 PE=4 SV=1                                   |
| CCG023535.1 | 765  | 39   | 586 | 2.19061392 | 26.77849698 | 3.611667839  | Up   | 7.33E-14  | 2.38E-13  | AAEL000141-PA OS=Aedes aegypti GN=AAEL000141 PE=4 SV=1                                   |
| CCG028121.1 | 2115 | 42   | 586 | 0.85329969 | 9.685839333 | 3.504752635  | Up   | 7.66E-14  | 2.47E-13  | AAEL000900-PA OS=Aedes aegypti GN=AAEL000900 PE=4 SV=1                                   |
| CCG027441.1 | 1013 | 43   | 586 | 1.82398676 | 20.22265566 | 3.470805304  | Up   | 8.46E-14  | 2.71E-13  | AAEL000128-PA (Fragment) OS=Aedes aegypti GN=AAEL000128 PE=4 SV=1                        |
| CCG023065.1 | 1217 | 87   | 586 | 3.07178875 | 16.83282678 | 2.454126562  | Up   | 0         | 0         | AAEL004333-PA OS=Aedes aegypti GN=AAEL004333 PE=4 SV=1                                   |
| CCG007941.1 | 1011 | 237  | 586 | 10.0730238 | 20.26266092 | 1.008326809  | Up   | 2.32E-13  | 6.61E-13  | AAEL009183-PA OS=Aedes aegypti GN=AAEL009183 PE=3 SV=1                                   |

|             |      |      |     |            |             |              |      |           |            |                                                                                                     |
|-------------|------|------|-----|------------|-------------|--------------|------|-----------|------------|-----------------------------------------------------------------------------------------------------|
| CCG001094.1 | 631  | 2485 | 586 | 169.223123 | 32.46521424 | -2.381960078 | Down | 0         | 0          | Putative uncharacterized protein<br>OS=Culex quinquefasciatus<br>GN=CpipJ_CPIJ007377 PE=4<br>SV=1   |
| CCG027161.1 | 2013 | 37   | 587 | 0.78980635 | 10.19399328 | 3.690076531  | Up   | 5.17E-14  | 1.74E-13   | AAEL012059-PA OS=Aedes<br>aegypti GN=AAEL012059 PE=4<br>SV=1                                        |
| CCG005518.1 | 1523 | 982  | 587 | 27.7060272 | 13.47374161 | -1.040049317 | Down | 4.13E-45  | 1.88E-44   | AAEL000186-PA OS=Aedes<br>aegypti GN=AAEL006186 PE=4<br>SV=1                                        |
| CCG027169.1 | 1185 | 61   | 588 | 2.21194414 | 17.34638544 | 2.971248211  | Up   | 1.75E-14  | 6.18E-14   | AAEL001587-PA OS=Aedes<br>aegypti GN=AAEL001587 PE=4<br>SV=1                                        |
| CCG006308.1 | 1423 | 69   | 588 | 2.08356408 | 14.44516285 | 2.793461092  | Up   | 0         | 0          | CXAX prenyl protease z<br>OS=Culex quinquefasciatus<br>GN=CpipJ_CPIJ002690 PE=4<br>SV=1             |
| CCG020129.1 | 1462 | 71   | 588 | 2.0867655  | 14.05982677 | 2.752238429  | Up   | 0         | 0          | AAEL012330-PA OS=Aedes<br>aegypti GN=AAEL012330 PE=3<br>SV=1                                        |
| CCG022951.1 | 642  | 90   | 588 | 6.02379457 | 32.01786097 | 2.410132452  | Up   | 0         | 0          | AAEL004945-PA (Fragment)<br>OS=Aedes aegypti<br>GN=AAEL004945 PE=4 SV=1                             |
| CCG021085.1 | 2013 | 1383 | 588 | 29.5216806 | 10.21135953 | -1.531599892 | Down | 5.77E-114 | 3.12E-113  | AAEL001645-PA OS=Aedes<br>aegypti GN=AAEL001645 PE=4<br>SV=1                                        |
| CCG014928.1 | 1299 | 99   | 589 | 3.27482966 | 15.85098154 | 2.275080408  | Up   | 0         | 0          | AAEL013546-PA OS=Aedes<br>aegypti GN=AAEL013546 PE=3<br>SV=1                                        |
| CCG014507.1 | 1146 | 141  | 589 | 5.28685216 | 17.96721206 | 1.764885675  | Up   | 0         | 0          | AAEL007219-PA OS=Aedes<br>aegypti GN=AAEL007219 PE=4<br>SV=1                                        |
| CCG022389.1 | 1657 | 1599 | 589 | 41.4656642 | 12.42632771 | -1.738517196 | Down | 1.10E-157 | 6.33E-157  | AAEL000505-PA OS=Aedes<br>aegypti GN=AAEL000505 PE=4<br>SV=1                                        |
| CCG004419.1 | 1046 | 2    | 590 | 0.0821601  | 19.71833967 | 7.906884348  | Up   | 9.36E-05  | 0.00015327 | Similar to Aedes aegypti 34 kDa<br>salivary secreted protein 34k-2<br>OS=Aedes albopictus PE=2 SV=1 |
| CCG006164.1 | 1695 | 18   | 590 | 0.45631577 | 12.16836773 | 4.736959347  | Up   | 1.62E-09  | 3.32E-09   | AAEL004698-PA OS=Aedes<br>aegypti GN=AAEL004698 PE=4<br>SV=1                                        |
| CCG015632.1 | 1414 | 35   | 590 | 1.06360729 | 14.58655113 | 3.777601331  | Up   | 6.39E-14  | 2.11E-13   | AAEL000874-PA OS=Aedes<br>aegypti GN=AAEL008724 PE=4<br>SV=1                                        |
| CCG002763.1 | 616  | 36   | 590 | 2.51121826 | 33.48276509 | 3.736959347  | Up   | 6.13E-14  | 2.03E-13   | -                                                                                                   |
| CCG002254.1 | 1692 | 44   | 590 | 1.11741627 | 12.18994285 | 3.447452729  | Up   | 3.91E-14  | 1.34E-13   | AAEL000116-PA OS=Aedes<br>aegypti GN=AAEL008116 PE=4<br>SV=1                                        |

|             |       |      |     |            |             |              |      |          |          |                                                                         |
|-------------|-------|------|-----|------------|-------------|--------------|------|----------|----------|-------------------------------------------------------------------------|
| CCG008533.1 | 1924  | 105  | 590 | 2.3450219  | 10.72005369 | 2.19263883   | Up   | 0        | 0        | AAEL010896-PA OS=Aedes aegypti GN=AAEL010896 PE=4 SV=1                  |
| CCG021008.1 | 1339  | 106  | 590 | 3.40163694 | 15.40357229 | 2.178963894  | Up   | 0        | 0        | AAEL003870-PA OS=Aedes aegypti GN=AAEL003870 PE=4 SV=1                  |
| CCG007641.1 | 13256 | 178  | 590 | 0.57699251 | 1.55592813  | 1.431150917  | Up   | 1.15E-13 | 3.58E-13 | AAEL001257-PA OS=Aedes aegypti GN=AAEL001257 PE=3 SV=1                  |
| CCG000326.1 | 576   | 4    | 591 | 0.29840093 | 35.86864856 | 6.909327524  | Up   | 2.95E-05 | 5.04E-05 | AAEL011582-PA OS=Aedes aegypti GN=AAEL011582 PE=4 SV=1                  |
| CCG017426.1 | 1260  | 6    | 591 | 0.20461778 | 16.39709649 | 6.324365023  | Up   | 8.38E-06 | 1.48E-05 | Putative salivary serpin OS=Aedes albopictus PE=2 SV=1                  |
| CCG003541.1 | 2043  | 128  | 591 | 2.69218112 | 10.11274673 | 1.909327524  | Up   | 4.15E-14 | 1.42E-13 | AAEL002080-PA OS=Aedes aegypti GN=AAEL002080 PE=4 SV=1                  |
| CCG008371.1 | 1227  | 129  | 591 | 4.51760046 | 16.83809419 | 1.898100269  | Up   | 0        | 0        | Stoucho protein OS=Culex quinquefasciatus GN=CpipJ_CPIJ009226 PE=4 SV=1 |
| CCG016289.1 | 3157  | 153  | 591 | 2.08247368 | 6.544295715 | 1.651939681  | Up   | 0        | 0        | AAEL013725-PA OS=Aedes aegypti GN=AAEL013725 PE=4 SV=1                  |
| CCG027913.1 | 1110  | 220  | 591 | 8.51652398 | 18.61292034 | 1.12796781   | Up   | 4.61E-13 | 1.20E-12 | AAEL003409-PA OS=Aedes aegypti GN=AAEL003409 PE=3 SV=1                  |
| CCG024582.1 | 2631  | 1145 | 591 | 18.7002456 | 7.852657382 | -1.251804359 | Down | 5.97E-70 | 2.96E-69 | AGAP005258-PA OS=Anopheles gambiae GN=AGAP005258 PE=4 SV=4              |
| CCG001403.1 | 1650  | 49   | 592 | 1.27607091 | 12.54260597 | 3.297056725  | Up   | 0        | 0        | AAEL012038-PA OS=Aedes aegypti GN=AAEL012038 PE=4 SV=1                  |
| CCG026257.1 | 2097  | 62   | 592 | 1.27044518 | 9.869003266 | 2.957570259  | Up   | 0        | 0        | AAEL001160-PA OS=Aedes aegypti GN=AAEL001160 PE=4 SV=1                  |
| CCG018478.1 | 3636  | 93   | 592 | 1.09906087 | 5.691776636 | 2.372607758  | Up   | 4.04E-14 | 1.39E-13 | AAEL007150-PA OS=Aedes aegypti GN=AAEL007150 PE=4 SV=1                  |
| CCG015229.1 | 1242  | 107  | 592 | 3.70190145 | 16.66288233 | 2.170299583  | Up   | 0        | 0        | AAEL004873-PA OS=Aedes aegypti GN=AAEL004873 PE=2 SV=1                  |
| CCG008217.1 | 831   | 151  | 592 | 7.80797825 | 24.90409127 | 1.67336183   | Up   | 0        | 0        | Proteasome subunit alpha type OS=Aedes aegypti GN=AAEL015007 PE=3 SV=1  |

|             |      |      |     |            |             |              |      |           |           |                                                                                                   |
|-------------|------|------|-----|------------|-------------|--------------|------|-----------|-----------|---------------------------------------------------------------------------------------------------|
| CCG014320.1 | 1729 | 1916 | 592 | 47.6171264 | 11.96951987 | -1.992115276 | Down | 4.02E-227 | 2.44E-226 | Putative uncharacterized protein<br>OS=Culex quinquefasciatus<br>GN=CpipJ_CPIJ005148 PE=4<br>SV=1 |
| CCG009500.1 | 1878 | 54   | 593 | 1.23555147 | 11.03847611 | 3.159313996  | Up   | 0         | 0         | AAEL012142-PA OS=Aedes<br>aegypti GN=AAEL012142 PE=4<br>SV=1                                      |
| CCG019022.1 | 2092 | 78   | 593 | 1.60212204 | 9.909301207 | 2.62879928   | Up   | 0         | 0         | AAEL013355-PA OS=Aedes<br>aegypti GN=AAEL013355 PE=4<br>SV=1                                      |
| CCG026212.1 | 3096 | 198  | 593 | 2.74806442 | 6.695819808 | 1.284844878  | Up   | 0         | 0         | AAEL007171-PA OS=Aedes<br>aegypti GN=AAEL007171 PE=3<br>SV=1                                      |
| CCG028116.1 | 2265 | 1428 | 593 | 27.0908525 | 9.152431844 | -1.565578766 | Down | 1.95E-121 | 1.07E-120 | Alpha-amylase 1 OS=Culex<br>quinquefasciatus<br>GN=CpipJ_CPIJ017521 PE=3<br>SV=1                  |
| CCG007027.1 | 7467 | 176  | 594 | 1.01281282 | 2.780931619 | 1.457200706  | Up   | 0         | 0         | AAEL005044-PA OS=Aedes<br>aegypti GN=AAEL005044 PE=4<br>SV=1                                      |
| CCG010255.1 | 2112 | 190  | 594 | 3.86564847 | 9.832015342 | 1.346776716  | Up   | 2.69E-13  | 7.52E-13  | AAEL002910-PA OS=Aedes<br>aegypti GN=AAEL002910 PE=4<br>SV=1                                      |
| CCG011049.1 | 9529 | 1214 | 594 | 5.47436854 | 2.17916008  | -1.328920382 | Down | 3.77E-81  | 1.92E-80  | -                                                                                                 |
| CCG016480.1 | 2298 | 36   | 595 | 0.67315511 | 9.051425013 | 3.749134061  | Up   | 6.13E-14  | 2.03E-13  | AAEL006655-PA OS=Aedes<br>aegypti GN=AAEL006655 PE=4<br>SV=1                                      |
| CCG000242.1 | 9048 | 152  | 595 | 0.72186115 | 2.298869881 | 1.671131549  | Up   | 8.39E-14  | 2.69E-13  | -                                                                                                 |
| CCG001789.1 | 1472 | 163  | 595 | 4.75819751 | 14.13055345 | 1.570330908  | Up   | 1.80E-13  | 5.25E-13  | AAEL002772-PA OS=Aedes<br>aegypti GN=AAEL002772 PE=4<br>SV=1                                      |
| CCG026846.1 | 3115 | 206  | 595 | 2.84165821 | 6.677423653 | 1.232558535  | Up   | 1.10E-13  | 3.44E-13  | -                                                                                                 |
| CCG011082.1 | 823  | 239  | 595 | 12.4784527 | 25.27360228 | 1.018192254  | Up   | 6.72E-13  | 1.70E-12  | Putative uncharacterized protein<br>OS=Culex quinquefasciatus<br>GN=CpipJ_CPIJ017674 PE=4<br>SV=1 |
| CCG027697.1 | 595  | 4    | 596 | 0.28887217 | 35.01703018 | 6.921481724  | Up   | 2.95E-05  | 5.03E-05  | histone H1 OS=Culex<br>quinquefasciatus<br>GN=CpipJ_CPIJ012396 PE=3<br>SV=1                       |
| CCG010655.1 | 2069 | 108  | 596 | 2.24298276 | 10.07014643 | 2.166594222  | Up   | 0         | 0         | AAEL010613-PA OS=Aedes<br>aegypti GN=AAEL010613 PE=4<br>SV=1                                      |
| CCG002891.1 | 1635 | 118  | 596 | 3.10117962 | 12.74320058 | 2.038838675  | Up   | 0         | 0         | AGAP001363-PA OS=Anopheles<br>gambiae GN=AgaP_AGAP001363<br>PE=4 SV=4                             |

|             |      |      |     |            |             |              |      |           |           |                                                                       |
|-------------|------|------|-----|------------|-------------|--------------|------|-----------|-----------|-----------------------------------------------------------------------|
| CCG008498.1 | 3709 | 128  | 596 | 1.48291346 | 5.61745294  | 1.921481724  | Up   | 4.15E-14  | 1.42E-13  | AAEL007256-PA OS=Aedes aegypti GN=AAEL007256 PE=4 SV=1                |
| CCG014876.1 | 1326 | 128  | 596 | 4.14790802 | 15.71276995 | 1.921481724  | Up   | 4.15E-14  | 1.42E-13  | AAEL014308-PA OS=Aedes aegypti GN=AAEL014308 PE=4 SV=1                |
| CCG002920.1 | 657  | 137  | 596 | 8.96020341 | 31.71253114 | 1.823449641  | Up   | 2.90E-13  | 8.04E-13  | AAEL001875-PA OS=Aedes aegypti GN=AAEL001875 PE=4 SV=2                |
| CCG001313.1 | 2066 | 164  | 596 | 3.41095667 | 10.0847691  | 1.56392972   | Up   | 1.14E-13  | 3.54E-13  | AAEL000867-PA (Fragment) OS=Aedes aegypti GN=AAEL000867 PE=4 SV=1     |
| CCG004397.1 | 682  | 208  | 596 | 13.105139  | 30.55004832 | 1.221042006  | Up   | 3.93E-13  | 1.05E-12  | AAEL001622-PA OS=Aedes aegypti GN=AAEL001622 PE=3 SV=1                |
| CCG003223.1 | 1815 | 37   | 597 | 0.87596704 | 11.49867286 | 3.714446959  | Up   | 5.17E-14  | 1.74E-13  | AAEL008320-PA OS=Aedes aegypti GN=AAEL008320 PE=4 SV=1                |
| CCG024461.1 | 2285 | 49   | 597 | 0.92145164 | 9.133519139 | 3.309190481  | Up   | 0         | 0         | AGAP003794-PA OS=Anopheles gambiae GN=AgaP_AGAP003794 PE=4 SV=5       |
| CCG023521.1 | 1188 | 75   | 597 | 2.71273577 | 17.56741686 | 2.695081635  | Up   | 0         | 0         | tRNA-dihydrouridine synthase OS=Aedes aegypti GN=AAEL005898 PE=3 SV=1 |
| CCG000927.1 | 684  | 111  | 598 | 6.97315869 | 30.56293788 | 2.131899012  | Up   | 0         | 0         | AAEL013309-PA OS=Aedes aegypti GN=AAEL013309 PE=4 SV=1                |
| CCG013050.1 | 2373 | 130  | 598 | 2.3540099  | 8.809544673 | 1.903947065  | Up   | 0         | 0         | AAEL009427-PA OS=Aedes aegypti GN=AAEL009427 PE=4 SV=1                |
| CCG004448.2 | 1764 | 145  | 598 | 3.5320927  | 11.8509351  | 1.746405788  | Up   | 0         | 0         | AAEL001426-PA OS=Aedes aegypti GN=AAEL001426 PE=4 SV=1                |
| CCG013032.1 | 620  | 215  | 598 | 14.9007951 | 33.71782179 | 1.178122028  | Up   | 0         | 0         | AAEL000722-PA OS=Aedes aegypti GN=AAEL000722 PE=4 SV=1                |
| CCG001579.1 | 5457 | 1670 | 598 | 13.1499829 | 3.830868519 | -1.779317509 | Down | 5.10E-170 | 2.96E-169 | Strinthe OS=Culex quinquefasciatus GN=Cuq1_Cuq1014866 PE=4 SV=1       |
| CCG002942.1 | 2022 | 22   | 599 | 0.46752431 | 10.35608694 | 4.469293778  | Up   | 8.38E-11  | 1.80E-10  | AAEL007457-PA OS=Aedes aegypti GN=AAEL007457 PE=4 SV=1                |
| CCG006675.1 | 1003 | 169  | 599 | 7.24016466 | 20.87737566 | 1.52784596   | Up   | 0         | 0         | AAEL007280-PA OS=Aedes aegypti GN=AAEL007280 PE=4 SV=1                |
| CCG000392.1 | 3825 | 1701 | 599 | 19.1088937 | 5.47451184  | -1.803442029 | Down | 2.10E-176 | 1.23E-175 | AAEL010379-PA OS=Aedes aegypti GN=AAEL010379 PE=3 SV=1                |

|             |      |      |     |            |             |              |      |           |           |                                                                                          |
|-------------|------|------|-----|------------|-------------|--------------|------|-----------|-----------|------------------------------------------------------------------------------------------|
| CCG009860.1 | 1473 | 1778 | 599 | 51.8670659 | 14.21589123 | -1.867314212 | Down | 2.50E-193 | 1.48E-192 | AAEL012404-PA OS=Aedes aegypti GN=AAEL012464 PE=3 SV=1                                   |
| CCG002643.1 | 915  | 2149 | 599 | 100.920175 | 22.88525441 | -2.140724371 | Down | 1.51E-279 | 9.42E-279 | AAEL010163-PA OS=Aedes aegypti GN=AAEL010163 PE=4 SV=1                                   |
| CCG003865.1 | 1071 | 2435 | 599 | 97.6949615 | 19.551828   | -2.32098066  | Down | 0         | 0         | AAEL002457-PA OS=Aedes aegypti GN=AAEL002457 PE=4 SV=1                                   |
| CCG013787.1 | 1549 | 74   | 600 | 2.05278267 | 13.54097228 | 2.721678529  | Up   | 0         | 0         | AAEL005325-PA OS=Aedes aegypti GN=AAEL005325 PE=4 SV=1                                   |
| CCG022629.1 | 2927 | 75   | 600 | 1.10103522 | 7.16602872  | 2.702313204  | Up   | 0         | 0         | AAEL009308-PA OS=Aedes aegypti GN=AAEL009308 PE=4 SV=1                                   |
| CCG004160.1 | 1821 | 107  | 600 | 2.52485536 | 11.51837785 | 2.189664908  | Up   | 0         | 0         | AAEL004343-PA OS=Aedes aegypti GN=AAEL004343 PE=3 SV=1                                   |
| CCG024270.1 | 3834 | 175  | 600 | 1.9613207  | 5.470778838 | 1.479920782  | Up   | 3.55E-13  | 9.59E-13  | AAEL008035-PA OS=Aedes aegypti GN=AAEL008035 PE=4 SV=1                                   |
| CCG009926.1 | 1023 | 9    | 601 | 0.37803286 | 20.53756045 | 5.763609383  | Up   | 1.09E-06  | 2.01E-06  | AAEL010910-PA OS=Aedes aegypti GN=AAEL010910 PE=4 SV=1                                   |
| CCG026426.1 | 1854 | 145  | 601 | 3.36063189 | 11.33221378 | 1.753625295  | Up   | 0         | 0         | AAEL001151-PA OS=Aedes aegypti GN=AAEL001151 PE=3 SV=1                                   |
| CCG003830.1 | 6285 | 1513 | 601 | 10.3441859 | 3.342867835 | -1.629661888 | Down | 3.20E-136 | 1.79E-135 | AAEL009888-PA OS=Aedes aegypti GN=AAEL009888 PE=4 SV=1                                   |
| CCG002231.1 | 1227 | 2933 | 601 | 102.714125 | 17.12300272 | -2.584626971 | Down | 0         | 0         | AAEL013431-PA (Fragment) OS=Aedes aegypti GN=AAEL013431 PE=4 SV=1                        |
| CCG006577.1 | 1890 | 51   | 602 | 1.15950078 | 11.13485853 | 3.263507539  | Up   | 0         | 0         | AAEL006381-PA OS=Aedes aegypti GN=AAEL006381 PE=4 SV=1                                   |
| CCG022814.1 | 1722 | 66   | 602 | 1.64692363 | 12.22118619 | 2.891538761  | Up   | 0         | 0         | AAEL004352-PA OS=Aedes aegypti GN=AAEL004352 PE=4 SV=1                                   |
| CCG024056.1 | 2226 | 70   | 602 | 1.35124952 | 9.454125165 | 2.806649864  | Up   | 0         | 0         | AAEL013014-PA OS=Aedes aegypti GN=AAEL013014 PE=4 SV=1                                   |
| CCG009177.1 | 2379 | 72   | 602 | 1.30047116 | 8.846104505 | 2.766007879  | Up   | 0         | 0         | Receptor protein tyrosine kinase OS=Culex quinquefasciatus GN=CpipJ_CPIJ000058 PE=3 SV=1 |
| CCG017968.1 | 918  | 157  | 602 | 7.34885439 | 22.92470873 | 1.641312132  | Up   | 0         | 0         | AAEL008373-PA OS=Aedes aegypti GN=AAEL008373 PE=4 SV=1                                   |

|             |      |        |     |            |             |              |      |           |           |                                                                                          |
|-------------|------|--------|-----|------------|-------------|--------------|------|-----------|-----------|------------------------------------------------------------------------------------------|
| CCG017266.1 | 1242 | 206    | 602 | 7.12702523 | 16.94434993 | 1.249432353  | Up   | 1.10E-13  | 3.43E-13  | AAEL006868-PA OS=Aedes aegypti GN=AAEL006868 PE=3 SV=1                                   |
| CCG000205.1 | 4136 | 226535 | 602 | 2353.51761 | 5.088221136 | -8.85344156  | Down | 0         | 0         | ADP,ATP carrier protein 2 OS=Culex quinquefasciatus GN=CpipJ_CPIJ005941 PE=3 SV=1        |
| CCG004332.1 | 684  | 86     | 603 | 5.40262745 | 30.81848084 | 2.512062641  | Up   | 0         | 0         | Single-stranded DNA-binding protein OS=Aedes aegypti GN=AAEL000147 PE=3 SV=1             |
| CCG026604.1 | 2835 | 183    | 603 | 2.77370774 | 7.43556998  | 1.422627557  | Up   | 3.05E-13  | 8.42E-13  | AAEL003865-PA OS=Aedes aegypti GN=AAEL003865 PE=4 SV=1                                   |
| CCG021820.1 | 1407 | 198    | 603 | 6.04691361 | 14.98211862 | 1.308970776  | Up   | 0         | 0         | AAEL010563-PA OS=Aedes aegypti GN=AAEL010563 PE=3 SV=1                                   |
| CCG027447.1 | 2477 | 228    | 603 | 3.95522789 | 8.510230478 | 1.105437382  | Up   | 1.05E-13  | 3.28E-13  | AAEL013769-PA OS=Aedes aegypti GN=AAEL013769 PE=4 SV=1                                   |
| CCG027462.2 | 1722 | 11     | 604 | 0.27448727 | 12.26178814 | 5.481286325  | Up   | 2.67E-07  | 5.03E-07  | AAEL011836-PA OS=Aedes aegypti GN=AAEL011836 PE=4 SV=1                                   |
| CCG021644.2 | 1548 | 161    | 604 | 4.46907447 | 13.64005114 | 1.609801065  | Up   | 0         | 0         | AAEL000403-PA OS=Aedes aegypti GN=AAEL000403 PE=4 SV=1                                   |
| CCG010168.1 | 6087 | 983    | 604 | 6.93925565 | 3.468835086 | -1.000329663 | Down | 1.93E-42  | 8.70E-42  | AAEL005871-PA OS=Aedes aegypti GN=AAEL005871 PE=4 SV=1                                   |
| CCG017201.1 | 2307 | 1366   | 604 | 25.4428511 | 9.152492055 | -1.475023825 | Down | 1.60E-106 | 8.55E-106 | Phosphoserine aminotransferase OS=Aedes aegypti PE=2 SV=1                                |
| CCG017023.1 | 891  | 61     | 605 | 2.94181124 | 23.73710151 | 3.012367198  | Up   | 1.75E-14  | 6.17E-14  | AAEL014296-PA OS=Aedes aegypti GN=AAEL014296 PE=4 SV=1                                   |
| CCG020064.1 | 2064 | 83     | 605 | 1.7279496  | 10.24697551 | 2.568065105  | Up   | 1.32E-13  | 4.02E-13  | AAEL014145-PA OS=Aedes aegypti GN=AAEL014145 PE=4 SV=1                                   |
| CCG002801.1 | 1302 | 99     | 605 | 3.26728397 | 16.24405334 | 2.313747916  | Up   | 0         | 0         | Putative uncharacterized protein OS=Culex quinquefasciatus GN=CpipJ_CPIJ011327 PE=4 SV=1 |
| CCG023328.1 | 1005 | 102    | 605 | 4.36110739 | 21.04453477 | 2.270679194  | Up   | 0         | 0         | AAEL005203-PA OS=Aedes aegypti GN=AAEL005203 PE=4 SV=1                                   |
| CCG027760.1 | 1053 | 68     | 606 | 2.77487365 | 20.11843848 | 2.858024346  | Up   | 0         | 0         | KRR1 small subunit processome component OS=Aedes aegypti GN=AAEL000708 PE=3 SV=1         |



|             |      |      |     |            |             |              |      |          |          |                                                                   |
|-------------|------|------|-----|------------|-------------|--------------|------|----------|----------|-------------------------------------------------------------------|
| CCG022229.1 | 540  | 98   | 606 | 7.7982111  | 39.23095504 | 2.330777343  | Up   | 0        | 0        | AGAP010252-PA OS=Anopheles gambiae GN=AGAP010252 PE=3 SV=3        |
| CCG007221.2 | 2013 | 111  | 606 | 2.36941905 | 10.52395217 | 2.151071321  | Up   | 0        | 0        | AAEL005074-PA OS=Aedes aegypti GN=AAEL005074 PE=4 SV=1            |
| CCG019571.1 | 2965 | 153  | 606 | 2.21732526 | 7.144929418 | 1.688099345  | Up   | 0        | 0        | AAEL001756-PA OS=Aedes aegypti GN=AAEL001756 PE=3 SV=1            |
| CCG012442.1 | 912  | 188  | 606 | 8.85779617 | 23.22885496 | 1.390898336  | Up   | 1.80E-13 | 5.24E-13 | AAEL011988-PA OS=Aedes aegypti GN=AAEL011988 PE=4 SV=1            |
| CCG014493.1 | 1803 | 233  | 606 | 5.55293853 | 11.74970367 | 1.081301043  | Up   | 0        | 0        | AAEL006343-PA OS=Aedes aegypti GN=AAEL006343 PE=4 SV=1            |
| CCG017615.1 | 1733 | 30   | 607 | 0.74384999 | 12.24447432 | 4.040975314  | Up   | 3.71E-13 | 9.93E-13 | AGAP013226-PA OS=Anopheles gambiae GN=AgaP_AGAP013226 PE=4 SV=1   |
| CCG023635.1 | 1065 | 67   | 607 | 2.7032603  | 19.92457653 | 2.88177672   | Up   | 0        | 0        | AAEL015082-PA (Fragment) OS=Aedes aegypti GN=AAEL015082 PE=4 SV=1 |
| CCG001035.1 | 690  | 151  | 607 | 9.40352163 | 30.75315073 | 1.709461171  | Up   | 0        | 0        | -                                                                 |
| CCG010591.1 | 1643 | 1320 | 607 | 34.5222457 | 12.91520024 | -1.418456304 | Down | 3.53E-97 | 1.86E-96 | AAEL010151-PA OS=Aedes aegypti GN=CYP6N16 PE=3 SV=2               |
| CCG013097.1 | 1029 | 25   | 608 | 1.04396829 | 20.65561932 | 4.306384527  | Up   | 9.32E-12 | 2.08E-11 | AAEL007980-PA OS=Aedes aegypti GN=AAEL007980 PE=4 SV=1            |
| CCG017890.1 | 2160 | 45   | 608 | 0.8952028  | 9.840107536 | 3.458387621  | Up   | 0        | 0        | AAEL013593-PA OS=Aedes aegypti GN=AAEL013593 PE=4 SV=1            |
| CCG008817.1 | 1734 | 102  | 608 | 2.52763145 | 12.2575734  | 2.277815375  | Up   | 0        | 0        | AAEL007244-PA OS=Aedes aegypti GN=AAEL007244 PE=4 SV=1            |
| CCG009595.1 | 900  | 215  | 609 | 10.2649922 | 23.65510062 | 1.204418772  | Up   | 0        | 0        | AAEL010592-PA OS=Aedes aegypti GN=AAEL010592 PE=4 SV=1            |
| CCG000118.1 | 1047 | 1318 | 609 | 54.0917958 | 20.33389738 | -1.411523033 | Down | 2.52E-96 | 1.32E-95 | AAEL006526-PA OS=Aedes aegypti GN=AAEL006526 PE=4 SV=1            |
| CCG003021.2 | 1536 | 77   | 610 | 2.15408175 | 13.88316981 | 2.688192096  | Up   | 0        | 0        | AAEL010805-PA OS=Aedes aegypti GN=AAEL010805 PE=4 SV=1            |
| CCG020316.1 | 1563 | 183  | 611 | 5.0310054  | 13.66571152 | 1.441641935  | Up   | 3.05E-13 | 8.42E-13 | AAEL004757-PA OS=Aedes aegypti GN=AAEL004757 PE=4 SV=1            |

|             |      |      |     |            |             |              |      |          |            |                                                                                               |
|-------------|------|------|-----|------------|-------------|--------------|------|----------|------------|-----------------------------------------------------------------------------------------------|
| CCG020992.2 | 1940 | 218  | 611 | 4.82855781 | 11.01005521 | 1.189157449  | Up   | 0        | 0          | AAEL001893-PA OS=Aedes aegypti GN=AAEL001893 PE=4 SV=1                                        |
| CCG028549.1 | 2356 | 240  | 611 | 4.37722254 | 9.066004715 | 1.050451178  | Up   | 0        | 0          | AAEL009174-PA OS=Aedes aegypti GN=AAEL009174 PE=2 SV=1                                        |
| CCG026999.1 | 630  | 241  | 611 | 16.4376286 | 33.90397954 | 1.044452437  | Up   | 2.37E-13 | 6.72E-13   | Ubiquitin carboxyl-terminal hydrolase (Fragment) OS=Anopheles gambiae GN=AGAP009348 PE=3 SV=4 |
| CCG013805.1 | 1137 | 1182 | 611 | 44.6703837 | 18.78584618 | -1.249672547 | Down | 5.81E-72 | 2.89E-71   | AAEL012311-PA OS=Aedes aegypti GN=AAEL012311 PE=3 SV=1                                        |
| CCG007431.1 | 2460 | 1286 | 611 | 22.4630401 | 8.682726467 | -1.371333154 | Down | 4.88E-90 | 2.54E-89   | AAEL004090-PA (Fragment) OS=Aedes aegypti GN=AAEL004090 PE=4 SV=1                             |
| CCG027427.1 | 1665 | 159  | 612 | 4.1034161  | 12.84952876 | 1.646818091  | Up   | 5.53E-14 | 1.85E-13   | AAEL011371-PA OS=Aedes aegypti GN=AAEL011371 PE=4 SV=1                                        |
| CCG003976.1 | 1869 | 187  | 612 | 4.29927254 | 11.44701198 | 1.412806587  | Up   | 3.31E-13 | 9.04E-13   | AAEL009736-PA OS=Aedes aegypti GN=AAEL009736 PE=4 SV=1                                        |
| CCG027301.2 | 1194 | 20   | 613 | 0.71976105 | 17.94759101 | 4.640128373  | Up   | 3.69E-10 | 7.70E-10   | AAEL004128-PA OS=Aedes aegypti GN=AAEL004128 PE=4 SV=1                                        |
| CCG002816.1 | 1525 | 51   | 613 | 1.43702063 | 14.05208109 | 3.289631126  | Up   | 0        | 0          | AAEL011361-PA OS=Aedes aegypti GN=AAEL011361 PE=4 SV=1                                        |
| CCG014300.1 | 1236 | 71   | 613 | 2.46832618 | 17.33772141 | 2.812309348  | Up   | 0        | 0          | AAEL003572-PA OS=Aedes aegypti GN=AAEL003572 PE=4 SV=1                                        |
| CCG005066.1 | 2219 | 73   | 613 | 1.41360551 | 9.657243651 | 2.772231909  | Up   | 0        | 0          | AAEL002864-PA OS=Aedes aegypti GN=AAEL002864 PE=4 SV=1                                        |
| CCG004176.1 | 1868 | 176  | 613 | 4.04854031 | 11.47185421 | 1.502624849  | Up   | 0        | 0          | AAEL007797-PA OS=Aedes aegypti GN=AAEL007797 PE=4 SV=1                                        |
| CCG020178.1 | 1362 | 2574 | 613 | 81.2071196 | 15.73379123 | -2.367739871 | Down | 0        | 0          | AAEL014137-PA OS=Aedes aegypti GN=CLIPB25 PE=3 SV=1                                           |
| CCG010120.1 | 885  | 0    | 614 | 0.001      | 24.25353891 | 14.56590765  | Up   | 4.44E-16 | 1.64E-15   | AAEL014276-PA OS=Aedes aegypti GN=AAEL014276 PE=4 SV=1                                        |
| CCG005939.1 | 701  | 2    | 614 | 0.12259553 | 30.6196604  | 7.964408049  | Up   | 9.36E-05 | 0.00015403 | -                                                                                             |
| CCG017158.1 | 705  | 78   | 614 | 4.7540983  | 30.44593183 | 2.67900583   | Up   | 0        | 0          | AAEL005028-PA OS=Aedes aegypti GN=AAEL005028 PE=4 SV=1                                        |

|             |      |      |     |            |             |              |      |           |           |                                                                                                                 |
|-------------|------|------|-----|------------|-------------|--------------|------|-----------|-----------|-----------------------------------------------------------------------------------------------------------------|
| CCG014675.1 | 1887 | 95   | 614 | 2.16328818 | 11.37487119 | 2.394552441  | Up   | 0         | 0         | AAEL010795-PA OS=Aedes aegypti GN=AAEL010795 PE=4 SV=1                                                          |
| CCG010360.1 | 1802 | 1066 | 614 | 25.419388  | 11.91142172 | -1.093583674 | Down | 7.33E-53  | 3.46E-52  | AAEL001548-PA OS=Aedes aegypti GN=AAEL001548 PE=4 SV=1                                                          |
| CCG020389.1 | 4542 | 1532 | 614 | 14.4935344 | 4.725755601 | -1.616792533 | Down | 2.41E-136 | 1.35E-135 | AAEL007316-PA OS=Aedes aegypti GN=AAEL007316 PE=4 SV=1                                                          |
| CCG023245.1 | 795  | 7352 | 614 | 397.375458 | 26.99922256 | -3.879513002 | Down | 0         | 0         | NADH dehydrogenase iron-sulfur protein 3, mitochondrial OS=Culex quinquefasciatus GN=CpipJ_CPIJ013503 PE=3 SV=1 |
| CCG022858.1 | 1820 | 68   | 615 | 1.60546261 | 11.81282429 | 2.879292963  | Up   | 0         | 0         | Predicted acetyltransferase OS=Aedes aegypti PE=2 SV=1                                                          |
| CCG006588.2 | 1314 | 176  | 615 | 5.75545913 | 16.36175054 | 1.507324185  | Up   | 0         | 0         | AAEL008932-PA OS=Aedes aegypti GN=AAEL008932 PE=3 SV=1                                                          |
| CCG022511.1 | 5013 | 205  | 615 | 1.75719042 | 4.288717378 | 1.287275705  | Up   | 1.83E-13  | 5.31E-13  | Canalicular multispecific organic anion transporter 1 OS=Culex quinquefasciatus GN=CpipJ_CPIJ016918 PE=3 SV=1   |
| CCG001424.1 | 763  | 32   | 616 | 1.80213828 | 28.22319593 | 3.969099745  | Up   | 1.77E-13  | 5.16E-13  | AAEL009555-PA OS=Aedes aegypti GN=AAEL009555 PE=4 SV=1                                                          |
| CCG004751.1 | 6676 | 120  | 616 | 0.7723739  | 3.225628893 | 2.062209149  | Up   | 0         | 0         | AAEL012178-PA OS=Aedes aegypti GN=AAEL012178 PE=4 SV=1                                                          |
| CCG007242.1 | 1375 | 203  | 616 | 6.34389536 | 15.66130799 | 1.303763827  | Up   | 9.28E-14  | 2.93E-13  | AAEL013643-PA OS=Aedes aegypti GN=AAEL013643 PE=4 SV=1                                                          |
| CCG013204.5 | 2007 | 237  | 616 | 5.07415401 | 10.72959566 | 1.080356496  | Up   | 2.32E-13  | 6.62E-13  | AAEL007865-PA OS=Aedes aegypti GN=AAEL007865 PE=4 SV=1                                                          |
| CCG002091.1 | 822  | 1796 | 616 | 93.8852109 | 26.19744342 | -1.84147189  | Down | 1.41E-191 | 8.38E-191 | AAEL011315-PA OS=Aedes aegypti GN=AAEL011315 PE=4 SV=1                                                          |
| CCG001439.5 | 2036 | 43   | 617 | 0.90751404 | 10.59393751 | 3.545175128  | Up   | 8.46E-14  | 2.70E-13  | AAEL003261-PA OS=Aedes aegypti GN=AAEL003261 PE=4 SV=1                                                          |
| CCG001062.1 | 723  | 138  | 617 | 8.20169208 | 29.83299691 | 1.862915426  | Up   | 1.49E-13  | 4.45E-13  | AAEL010753-PA OS=Aedes aegypti GN=AAEL010753 PE=4 SV=1                                                          |
| CCG009830.1 | 1428 | 159  | 617 | 4.78444524 | 15.10452155 | 1.658556928  | Up   | 5.53E-14  | 1.85E-13  | AAEL007967-PA OS=Aedes aegypti GN=AAEL007967 PE=4 SV=1                                                          |

|             |      |       |     |            |             |              |      |           |           |                                                                                           |
|-------------|------|-------|-----|------------|-------------|--------------|------|-----------|-----------|-------------------------------------------------------------------------------------------|
| CCG000052.1 | 1569 | 183   | 617 | 5.01176637 | 13.74713625 | 1.455740045  | Up   | 3.05E-13  | 8.41E-13  | AAEL014628-PA OS=Aedes aegypti GN=AAEL014628 PE=4 SV=1                                    |
| CCG004008.1 | 1191 | 239   | 617 | 8.62280988 | 18.11020719 | 1.070573075  | Up   | 6.72E-13  | 1.70E-12  | AAEL008416-PA OS=Aedes aegypti GN=AAEL008416 PE=4 SV=1                                    |
| CCG028029.1 | 1055 | 1712  | 617 | 69.7290859 | 20.44479315 | -1.770027103 | Down | 5.59E-173 | 3.25E-172 | AAEL000431-PA OS=Aedes aegypti GN=AAEL000431 PE=4 SV=1                                    |
| CCG006203.1 | 992  | 11834 | 617 | 512.604677 | 21.74320239 | -4.559210297 | Down | 0         | 0         | AAEL006070-PA OS=Aedes aegypti GN=AAEL006070 PE=3 SV=1                                    |
| CCG014788.1 | 477  | 26    | 618 | 2.34216583 | 45.29185544 | 4.273336514  | Up   | 4.60E-12  | 1.05E-11  | AAEL013145-PA OS=Aedes aegypti GN=AAEL013145 PE=4 SV=1                                    |
| CCG010131.1 | 621  | 58    | 618 | 4.01327634 | 34.78939621 | 3.115795237  | Up   | 0         | 0         | AAEL003944-PA OS=Aedes aegypti GN=AAEL003944 PE=4 SV=1                                    |
| CCG011134.1 | 1338 | 146   | 618 | 4.68877523 | 16.14664802 | 1.783951673  | Up   | 9.33E-15  | 3.34E-14  | SV1 OS=Culex quinquefasciatus GN=CpipJ_CPIJ017451 PE=4 SV=1                               |
| CCG007830.1 | 747  | 167   | 618 | 9.60635299 | 28.92130528 | 1.590071939  | Up   | 1.62E-13  | 4.77E-13  | AAEL013467-PA OS=Aedes aegypti GN=AAEL013467 PE=4 SV=1                                    |
| CCG015665.1 | 3261 | 24    | 619 | 0.3162446  | 6.635747722 | 4.391146302  | Up   | 1.93E-11  | 4.23E-11  | Predicted protein (Fragment) OS=Nematostella vectensis GN=v1g103876 PE=4 SV=1             |
| CCG025259.1 | 1258 | 31    | 619 | 1.05887263 | 17.20125065 | 4.021912493  | Up   | 2.40E-13  | 6.76E-13  | AAEL007461-PA OS=Aedes aegypti GN=AAEL007461 PE=4 SV=1                                    |
| CCG010600.1 | 1566 | 89    | 619 | 2.44208581 | 13.81811834 | 2.500375372  | Up   | 0         | 0         | AAEL001827-PA OS=Aedes aegypti GN=AAEL001827 PE=4 SV=1                                    |
| CCG011843.1 | 2136 | 183   | 619 | 3.6813958  | 10.13069912 | 1.460408965  | Up   | 3.05E-13  | 8.42E-13  | AAEL012938-PA OS=Aedes aegypti GN=AAEL012938 PE=4 SV=1                                    |
| CCG027887.1 | 1840 | 1497  | 619 | 34.9596156 | 11.76042028 | -1.571749703 | Down | 6.12E-128 | 3.39E-127 | AAEL013434-PA OS=Aedes aegypti GN=AAEL013434 PE=4 SV=1                                    |
| CCG012828.1 | 1629 | 40    | 620 | 1.05511933 | 13.30517594 | 3.656509514  | Up   | 6.86E-14  | 2.24E-13  | Ubiquitin carboxyl-terminal hydrolase (Fragment) OS=Aedes aegypti GN=AAEL003517 PE=3 SV=1 |
| CCG022593.1 | 1521 | 50    | 620 | 1.4125488  | 14.24992216 | 3.334581419  | Up   | 0         | 0         | AAEL002784-PA OS=Aedes aegypti GN=AAEL002784 PE=4 SV=1                                    |
| CCG024952.1 | 3570 | 1014  | 620 | 12.204849  | 6.071185322 | -1.007404328 | Down | 3.21E-44  | 1.46E-43  | AAEL003026-PA OS=Aedes aegypti GN=AAEL003026 PE=4 SV=1                                    |

|             |      |      |     |            |             |              |      |           |           |                                                                                                |
|-------------|------|------|-----|------------|-------------|--------------|------|-----------|-----------|------------------------------------------------------------------------------------------------|
| CCG015336.1 | 815  | 1149 | 620 | 60.5794173 | 26.5940265  | -1.187725474 | Down | 1.05E-64  | 5.14E-64  | Putative uncharacterized protein<br>OS=Aedes aegypti PE=2 SV=1                                 |
| CCG001267.1 | 1683 | 24   | 622 | 0.61275914 | 12.91981471 | 4.398121473  | Up   | 1.93E-11  | 4.23E-11  | AAEL009218-PA OS=Aedes<br>aegypti GN=AAEL009218 PE=3<br>SV=1                                   |
| CCG020950.1 | 571  | 30   | 622 | 2.25760427 | 38.08064475 | 4.076193378  | Up   | 3.71E-13  | 9.94E-13  | -                                                                                              |
| CCG017451.1 | 1668 | 112  | 622 | 2.88525796 | 13.03600009 | 2.175729052  | Up   | 0         | 0         | AAEL013204-PA OS=Aedes<br>aegypti GN=AAEL013204 PE=4<br>SV=1                                   |
| CCG011269.1 | 882  | 1893 | 622 | 92.2241583 | 24.65311582 | -1.903374722 | Down | 4.02E-211 | 2.41E-210 | Putative uncharacterized protein<br>OS=Tribolium castaneum<br>GN=TcasGA2_TC013386 PE=4<br>SV=1 |
| CCG016245.1 | 3037 | 3151 | 622 | 44.5826914 | 7.159712925 | -2.638510065 | Down | 0         | 0         | Transporter OS=Aedes aegypti<br>GN=AAEL010681 PE=3 SV=1                                        |
| CCG002715.1 | 738  | 128  | 623 | 7.4527453  | 29.51084882 | 1.985401557  | Up   | 4.15E-14  | 1.42E-13  | AAEL009060-PA OS=Aedes<br>aegypti GN=AAEL009060 PE=4<br>SV=1                                   |
| CCG022255.1 | 1380 | 131  | 623 | 4.07901104 | 15.78188872 | 1.951978555  | Up   | 1.26E-13  | 3.87E-13  | Glycylpeptide N-<br>tetradecanoyltransferase<br>OS=Aedes aegypti<br>GN=AAEL005092 PE=3 SV=1    |
| CCG016630.1 | 1207 | 154  | 623 | 5.48246821 | 18.04391585 | 1.718615016  | Up   | 1.82E-13  | 5.29E-13  | Uncharacterized protein<br>OS=Anopheles darlingi<br>GN=AND_05216 PE=4 SV=1                     |
| CCG022308.1 | 1141 | 157  | 623 | 5.91257523 | 19.08764805 | 1.690780808  | Up   | 0         | 0         | AAEL008615-PA OS=Aedes<br>aegypti GN=AAEL008615 PE=4<br>SV=1                                   |
| CCG023823.1 | 1533 | 172  | 623 | 4.82113135 | 14.20678828 | 1.559136802  | Up   | 1.35E-13  | 4.09E-13  | AAEL015082-PA (Fragment)<br>OS=Aedes aegypti<br>GN=AAEL015082 PE=4 SV=1                        |
| CCG003249.1 | 1194 | 208  | 623 | 7.48551491 | 18.24037389 | 1.284961839  | Up   | 3.93E-13  | 1.05E-12  | AAEL006435-PA OS=Aedes<br>aegypti GN=AAEL006435 PE=3<br>SV=1                                   |
| CCG009921.1 | 959  | 94   | 624 | 4.21184051 | 22.74657425 | 2.433126571  | Up   | 0         | 0         | -                                                                                              |
| CCG018898.1 | 2067 | 132  | 624 | 2.74407594 | 10.55344204 | 1.943321303  | Up   | 1.46E-13  | 4.36E-13  | AAEL004791-PA OS=Aedes<br>aegypti GN=AAEL004791 PE=4<br>SV=1                                   |
| CCG018668.1 | 3942 | 136  | 624 | 1.48246674 | 5.533730265 | 1.900252581  | Up   | 1.70E-13  | 4.98E-13  | AAEL003495-PA (Fragment)<br>OS=Aedes aegypti<br>GN=AAEL003495 PE=4 SV=1                        |

|             |      |      |     |            |             |              |      |           |           |                                                                         |
|-------------|------|------|-----|------------|-------------|--------------|------|-----------|-----------|-------------------------------------------------------------------------|
| CCG024421.3 | 1860 | 148  | 624 | 3.41909716 | 11.72793801 | 1.778262057  | Up   | 0         | 0         | AAEL003546-PA OS=Aedes aegypti GN=AAEL003546 PE=4 SV=1                  |
| CCG013718.1 | 2979 | 155  | 624 | 2.23575323 | 7.322579626 | 1.711591017  | Up   | 3.42E-13  | 9.27E-13  | AAEL005025-PA OS=Aedes aegypti GN=AAEL005025 PE=4 SV=1                  |
| CCG016326.1 | 2067 | 2329 | 624 | 48.4163096 | 10.55344204 | -2.197779502 | Down | 0         | 0         | SLC12-like K,Cl cotransporter OS=Aedes aegypti GN=KCC1A PE=2 SV=1       |
| CCG025779.1 | 1128 | 50   | 625 | 1.90468682 | 19.36961257 | 3.346169394  | Up   | 0         | 0         | Nucleoprotein N OS=Tibrogargan virus GN=N PE=4 SV=1                     |
| CCG021997.1 | 1779 | 114  | 625 | 2.75354117 | 12.28157559 | 2.157135569  | Up   | 8.48E-14  | 2.70E-13  | AAEL005677-PA OS=Aedes aegypti GN=AAEL005677 PE=4 SV=1                  |
| CCG025940.1 | 2031 | 137  | 625 | 2.89850007 | 10.75771688 | 1.8919935    | Up   | 2.90E-13  | 8.04E-13  | AAEL011309-PA OS=Aedes aegypti GN=AAEL011309 PE=3 SV=1                  |
| CCG008709.1 | 2364 | 1613 | 625 | 29.3190279 | 9.242353208 | -1.66550514  | Down | 1.10E-149 | 6.27E-149 | Mis transporter OS=Culex quinquefasciatus GN=CpipJ_CPIJ017440 PE=4 SV=1 |
| CCG024662.1 | 813  | 17   | 626 | 0.89850614 | 26.91744312 | 4.904869209  | Up   | 3.39E-09  | 6.88E-09  | AGAP013324-PA OS=Anopheles gambiae GN=AgaP_AGAP013324 PE=4 SV=1         |
| CCG003761.1 | 694  | 85   | 626 | 5.26286375 | 31.53297011 | 2.582941115  | Up   | 0         | 0         | AAEL003435-PA OS=Aedes aegypti GN=AAEL003435 PE=4 SV=1                  |
| CCG023052.1 | 761  | 126  | 626 | 7.11456841 | 28.75674279 | 2.015052127  | Up   | 1.34E-13  | 4.06E-13  | AAEL000163-PA OS=Aedes aegypti GN=AAEL000163 PE=4 SV=1                  |
| CCG012807.1 | 2588 | 136  | 626 | 2.25806952 | 8.45590466  | 1.904869209  | Up   | 1.70E-13  | 4.98E-13  | AG2 OS=Culex quinquefasciatus GN=CpipJ_CPIJ015325 PE=3 SV=1             |
| CCG003529.1 | 1425 | 151  | 626 | 4.55328416 | 15.35710966 | 1.753927311  | Up   | 0         | 0         | AAEL009331-PA OS=Aedes aegypti GN=AAEL009331 PE=4 SV=1                  |
| CCG025636.2 | 1602 | 158  | 626 | 4.23796384 | 13.66035035 | 1.688551303  | Up   | 0         | 0         | AAEL008468-PA OS=Aedes aegypti GN=AAEL008468 PE=4 SV=1                  |
| CCG011149.1 | 675  | 221  | 626 | 14.0686094 | 32.42056483 | 1.204429491  | Up   | 0         | 0         | AAEL007349-PA OS=Aedes aegypti GN=AAEL007349 PE=4 SV=1                  |
| CCG020584.1 | 2208 | 1063 | 626 | 20.6869692 | 9.911178107 | -1.061593831 | Down | 2.68E-50  | 1.25E-49  | AAEL002412-PA OS=Aedes aegypti GN=AAEL002412 PE=4 SV=1                  |
| CCG002983.1 | 1193 | 53   | 627 | 1.90896558 | 18.37287472 | 3.266714382  | Up   | 0         | 0         | AAEL007708-PA OS=Aedes aegypti GN=AAEL007708 PE=4 SV=1                  |

|             |      |     |     |            |             |             |    |          |          |                                                                                               |
|-------------|------|-----|-----|------------|-------------|-------------|----|----------|----------|-----------------------------------------------------------------------------------------------|
| CCG007406.1 | 1911 | 60  | 628 | 1.34912825 | 11.48812026 | 3.090043357 | Up | 0        | 0        | AAEL004049-PA OS=Aedes aegypti GN=AAEL004049 PE=4 SV=1                                        |
| CCG011912.1 | 1341 | 65  | 628 | 2.08279847 | 16.37121388 | 2.97456614  | Up | 0        | 0        | DNA replication licensing factor Mcm6 OS=Culex quinquefasciatus GN=CpipJ_CPIJ009047 PE=3 SV=1 |
| CCG019425.1 | 1128 | 77  | 628 | 2.9332177  | 19.46258671 | 2.730147412 | Up | 0        | 0        | AAEL003385-PA OS=Aedes aegypti GN=AAEL003385 PE=4 SV=1                                        |
| CCG009386.1 | 1282 | 86  | 628 | 2.8825251  | 17.12464728 | 2.570669198 | Up | 0        | 0        | AAEL003456-PA OS=Aedes aegypti GN=AAEL003456 PE=4 SV=1                                        |
| CCG028043.1 | 2799 | 112 | 628 | 1.71940346 | 7.843443306 | 2.189579031 | Up | 0        | 0        | AAEL000924-PA OS=Aedes aegypti GN=AAEL000924 PE=4 SV=1                                        |
| CCG008685.1 | 465  | 209 | 628 | 19.3132786 | 47.21246842 | 1.289574821 | Up | 0        | 0        | Beta-arrestin 1 OS=Culex quinquefasciatus GN=CpipJ_CPIJ017114 PE=4 SV=1                       |
| CCG013832.1 | 1125 | 175 | 629 | 6.68418094 | 19.54556097 | 1.548018299 | Up | 3.55E-13 | 9.57E-13 | Proteasome subunit beta type OS=Aedes aegypti GN=AAEL002401 PE=3 SV=1                         |
| CCG020450.1 | 1368 | 247 | 629 | 7.7584243  | 16.07365211 | 1.050862179 | Up | 0        | 0        | AAEL004186-PA (Fragment) OS=Aedes aegypti GN=AAEL004186 PE=4 SV=1                             |
| CCG023854.1 | 1407 | 48  | 630 | 1.46591845 | 15.65295975 | 3.416558721 | Up | 5.35E-14 | 1.79E-13 | AAEL008550-PA OS=Aedes aegypti GN=AAEL008550 PE=4 SV=1                                        |
| CCG012732.1 | 1599 | 70  | 630 | 1.88110158 | 13.77342987 | 2.872238205 | Up | 0        | 0        | AAEL008867-PA OS=Aedes aegypti GN=AAEL008867 PE=4 SV=1                                        |
| CCG002660.1 | 2583 | 79  | 630 | 1.31421178 | 8.526408969 | 2.697740474 | Up | 0        | 0        | Putative uncharacterized protein OS=Culex quinquefasciatus GN=CpipJ_CPIJ002374 PE=4 SV=1      |
| CCG010813.1 | 2528 | 150 | 630 | 2.54962824 | 8.711912329 | 1.772702532 | Up | 0        | 0        | AAEL009242-PA OS=Aedes aegypti GN=AAEL009242 PE=4 SV=1                                        |
| CCG025220.1 | 2805 | 223 | 630 | 3.4161322  | 7.851591575 | 1.200621322 | Up | 0        | 0        | AAEL005811-PA OS=Aedes aegypti GN=AAEL005811 PE=4 SV=1                                        |
| CCG000848.1 | 546  | 30  | 631 | 2.36097443 | 40.40049935 | 4.096918803 | Up | 3.71E-13 | 9.93E-13 | AAEL005263-PA OS=Aedes aegypti GN=AAEL005263 PE=4 SV=1                                        |
| CCG018883.1 | 1356 | 45  | 631 | 1.42598677 | 16.2674577  | 3.511956302 | Up | 0        | 0        | AAEL011423-PA OS=Aedes aegypti GN=AAEL011423 PE=4 SV=1                                        |

|             |      |      |     |            |             |              |      |           |           |                                                                                          |
|-------------|------|------|-----|------------|-------------|--------------|------|-----------|-----------|------------------------------------------------------------------------------------------|
| CCG011261.1 | 1668 | 61   | 631 | 1.57143514 | 13.22462389 | 3.073072061  | Up   | 1.75E-14  | 6.17E-14  | AAEL013204-PA OS=Aedes aegypti GN=AAEL013204 PE=4 SV=1                                   |
| CCG027242.1 | 859  | 71   | 631 | 3.55163115 | 25.67947921 | 2.854062279  | Up   | 0         | 0         | AAEL006838-PA OS=Aedes aegypti GN=AAEL006838 PE=4 SV=1                                   |
| CCG018763.1 | 1452 | 144  | 631 | 4.26146128 | 15.19192331 | 1.833884397  | Up   | 7.53E-14  | 2.43E-13  | Putative uncharacterized protein OS=Culex quinquefasciatus GN=CpipJ_CPIJ004597 PE=4 SV=1 |
| CCG013928.1 | 732  | 221  | 631 | 12.9731029 | 30.13479869 | 1.215906839  | Up   | 0         | 0         | AAEL000488-PA OS=Aedes aegypti GN=AAEL000488 PE=4 SV=1                                   |
| CCG013160.1 | 1440 | 34   | 632 | 1.01456318 | 15.34279925 | 3.918631111  | Up   | 8.82E-14  | 2.80E-13  | AAEL004055-PA OS=Aedes aegypti GN=AAEL004055 PE=4 SV=1                                   |
| CCG026841.1 | 1105 | 39   | 632 | 1.51657887 | 19.99423613 | 3.720691733  | Up   | 7.33E-14  | 2.38E-13  | AAEL003648-PA OS=Aedes aegypti GN=AAEL003648 PE=4 SV=1                                   |
| CCG027165.1 | 1813 | 41   | 632 | 0.97173697 | 12.18622776 | 3.648541947  | Up   | 1.02E-13  | 3.19E-13  | AAEL009187-PA OS=Aedes aegypti GN=AAEL009187 PE=4 SV=1                                   |
| CCG025096.1 | 4041 | 47   | 632 | 0.49977172 | 5.467367216 | 3.4515051    | Up   | 0         | 0         | AAEL014493-PA OS=Aedes aegypti GN=AAEL014493 PE=4 SV=1                                   |
| CCG005024.1 | 996  | 52   | 632 | 2.2433998  | 22.18236036 | 3.305654234  | Up   | 0         | 0         | AAEL013114-PA OS=Aedes aegypti GN=AAEL013114 PE=4 SV=1                                   |
| CCG023235.1 | 897  | 218  | 632 | 10.4430347 | 24.63058074 | 1.237909627  | Up   | 0         | 0         | AAEL007593-PA OS=Aedes aegypti GN=CLIPC2 PE=3 SV=1                                       |
| CCG019184.1 | 856  | 131  | 633 | 6.57597574 | 25.8511556  | 1.974951892  | Up   | 1.26E-13  | 3.87E-13  | Condensin complex subunit 2 OS=Aedes aegypti GN=AAEL005962 PE=3 SV=1                     |
| CCG003150.1 | 1191 | 134  | 633 | 4.83454613 | 18.5798398  | 1.942285703  | Up   | 0         | 0         | AAEL007279-PA OS=Aedes aegypti GN=AAEL007279 PE=3 SV=1                                   |
| CCG025035.1 | 1375 | 155  | 633 | 4.84386099 | 16.09351942 | 1.732250488  | Up   | 3.42E-13  | 9.26E-13  | AAEL011526-PA OS=Aedes aegypti GN=GPRMTH5 PE=4 SV=2                                      |
| CCG020483.1 | 305  | 157  | 633 | 22.118847  | 72.55275147 | 1.713754144  | Up   | 0         | 0         | -                                                                                        |
| CCG001273.1 | 3242 | 235  | 633 | 3.11470933 | 6.825598148 | 1.131857947  | Up   | 4.34E-13  | 1.14E-12  | AAEL008115-PA OS=Aedes aegypti GN=AAEL008115 PE=4 SV=1                                   |
| CCG017552.1 | 4965 | 1591 | 633 | 13.769355  | 4.456916253 | -1.627343227 | Down | 7.52E-143 | 4.24E-142 | -                                                                                        |
| CCG027939.1 | 2134 | 1874 | 633 | 37.7344342 | 10.36953571 | -1.863530344 | Down | 4.28E-203 | 2.56E-202 | AAEL012291-PA OS=Aedes aegypti GN=AAEL012291 PE=4 SV=1                                   |



|             |      |     |     |            |             |             |    |          |          |                                                                                          |
|-------------|------|-----|-----|------------|-------------|-------------|----|----------|----------|------------------------------------------------------------------------------------------|
| CCG003055.1 | 1566 | 23  | 634 | 0.63110083 | 14.15296774 | 4.487090278 | Up | 4.01E-11 | 8.66E-11 | AAEL000422-PA OS=Aedes aegypti GN=AAEL000422 PE=4 SV=1                                   |
| CCG023750.1 | 1914 | 53  | 634 | 1.18986203 | 11.57970087 | 3.282731779 | Up | 0        | 0        | AAEL009254-PA OS=Aedes aegypti GN=AAEL009254 PE=3 SV=1                                   |
| CCG011608.1 | 2055 | 97  | 634 | 2.02825511 | 10.78518125 | 2.410739392 | Up | 3.62E-14 | 1.25E-13 | AAEL013546-PA OS=Aedes aegypti GN=AAEL013548 PE=4 SV=1                                   |
| CCG026570.1 | 1466 | 106 | 634 | 3.10695216 | 15.11838163 | 2.282731779 | Up | 0        | 0        | AAEL013521-PA OS=Aedes aegypti GN=AAEL013521 PE=3 SV=1                                   |
| CCG022913.1 | 1551 | 127 | 634 | 3.51847601 | 14.28984363 | 2.021967547 | Up | 1.57E-13 | 4.67E-13 | Spire OS=Culex quinquefasciatus GN=CpipJ_CPIJ011319 PE=4 SV=1                            |
| CCG010318.1 | 2041 | 146 | 634 | 3.07377817 | 10.85916094 | 1.820827675 | Up | 9.33E-15 | 3.34E-14 | AGAP002258-PB OS=Anopheles gambiae GN=AgaP_AGAP002258 PE=4 SV=1                          |
| CCG020490.1 | 828  | 47  | 635 | 2.43910329 | 26.80978955 | 3.458337134 | Up | 0        | 0        | Putative uncharacterized protein OS=Culex quinquefasciatus GN=CpipJ_CPIJ009765 PE=4 SV=1 |
| CCG027947.2 | 1362 | 81  | 635 | 2.5554688  | 16.29846237 | 2.673075983 | Up | 4.46E-14 | 1.51E-13 | RNA methyltransferase OS=Culex quinquefasciatus GN=CpipJ_CPIJ009249 PE=4 SV=1            |
| CCG019001.1 | 816  | 150 | 635 | 7.89884827 | 27.20405116 | 1.784107295 | Up | 0        | 0        | AAEL014671-PA OS=Aedes aegypti GN=AAEL014671 PE=4 SV=1                                   |
| CCG016968.1 | 798  | 153 | 635 | 8.23855814 | 27.81767638 | 1.755538143 | Up | 0        | 0        | AAEL000789-PA OS=Aedes aegypti GN=AAEL000789 PE=4 SV=1                                   |
| CCG024760.1 | 1734 | 50  | 636 | 1.23903502 | 12.82206691 | 3.371339969 | Up | 0        | 0        | AAEL000445-PA OS=Aedes aegypti GN=AAEL006445 PE=4 SV=1                                   |
| CCG002998.1 | 1311 | 67  | 636 | 2.19601237 | 16.95916402 | 2.949106969 | Up | 0        | 0        | AAEL007316-PA OS=Aedes aegypti GN=AAEL007318 PE=4 SV=1                                   |
| CCG025097.1 | 3286 | 111 | 636 | 1.45150351 | 6.766118085 | 2.220780293 | Up | 0        | 0        | AAEL014497-PA OS=Aedes aegypti GN=AAEL014497 PE=4 SV=1                                   |
| CCG026038.1 | 4266 | 116 | 636 | 1.16842223 | 5.211782472 | 2.157215164 | Up | 1.16E-13 | 3.58E-13 | CK3F complex subunit 3 OS=Culex quinquefasciatus GN=CpipJ_CPIJ000292 PE=4 SV=1           |
| CCG004688.1 | 1518 | 176 | 636 | 4.98199822 | 14.64655074 | 1.55576454  | Up | 0        | 0        | AAEL004892-PA OS=Aedes aegypti GN=AAEL004892 PE=4 SV=1                                   |

|             |      |      |     |            |             |              |      |          |          |                                                                                               |
|-------------|------|------|-----|------------|-------------|--------------|------|----------|----------|-----------------------------------------------------------------------------------------------|
| CCG025016.1 | 429  | 187  | 636 | 18.7303971 | 51.82625647 | 1.468301699  | Up   | 3.31E-13 | 9.04E-13 | AAEL002261-PA OS=Aedes aegypti GN=AAEL002261 PE=3 SV=1                                        |
| CCG000394.1 | 1182 | 203  | 636 | 7.37974292 | 18.81003725 | 1.349860242  | Up   | 9.28E-14 | 2.93E-13 | AAEL010388-PA OS=Aedes aegypti GN=AAEL010388 PE=4 SV=1                                        |
| CCG017285.1 | 2754 | 216  | 636 | 3.37017526 | 8.073153242 | 1.260308657  | Up   | 1.38E-13 | 4.17E-13 | AAEL003227-PA OS=Aedes aegypti GN=AAEL003227 PE=4 SV=1                                        |
| CCG003789.1 | 1464 | 13   | 637 | 0.38156185 | 15.21067097 | 5.317023048  | Up   | 6.34E-08 | 1.23E-07 | AAEL009404-PA OS=Aedes aegypti GN=AAEL009404 PE=4 SV=1                                        |
| CCG013984.1 | 3146 | 146  | 637 | 1.99414534 | 7.078328768 | 1.827638207  | Up   | 9.33E-15 | 3.33E-14 | AAEL004237-PA OS=Aedes aegypti GN=AAEL004237 PE=4 SV=1                                        |
| CCG023264.1 | 1787 | 191  | 637 | 4.59273604 | 12.46134432 | 1.440033938  | Up   | 6.68E-14 | 2.19E-13 | Transmembrane protein 15 OS=Culex quinquefasciatus GN=CpipJ_CPIJ002894 PE=4 SV=1              |
| CCG013066.1 | 1541 | 88   | 638 | 2.45382002 | 14.47331641 | 2.560294199  | Up   | 2.93E-14 | 1.02E-13 | AAEL001580-PA OS=Aedes aegypti GN=AAEL001580 PE=4 SV=1                                        |
| CCG009749.1 | 939  | 161  | 638 | 7.36754768 | 23.75226899 | 1.688808939  | Up   | 0        | 0        | AAEL006727-PA OS=Aedes aegypti GN=AAEL006727 PE=4 SV=1                                        |
| CCG007246.2 | 726  | 2612 | 638 | 154.596345 | 30.72090989 | -2.331213364 | Down | 0        | 0        | AAEL006711-PA OS=Aedes aegypti GN=AAEL006711 PE=4 SV=1                                        |
| CCG025085.1 | 939  | 20   | 639 | 0.91522331 | 23.78949825 | 4.70005723   | Up   | 3.69E-10 | 7.72E-10 | Sub1 OS=Culex quinquefasciatus GN=CpipJ_CPIJ009759 PE=4 SV=1                                  |
| CCG021426.1 | 1572 | 27   | 639 | 0.73802979 | 14.21013922 | 4.267097823  | Up   | 2.28E-12 | 5.41E-12 | AAEL013154-PA OS=Aedes aegypti GN=AAEL013154 PE=4 SV=1                                        |
| CCG021732.1 | 1369 | 114  | 639 | 3.57819558 | 16.31726724 | 2.189095311  | Up   | 8.48E-14 | 2.70E-13 | AAEL000465-PA OS=Aedes aegypti GN=AAEL000465 PE=4 SV=1                                        |
| CCG004503.1 | 652  | 140  | 639 | 9.22663013 | 34.26125592 | 1.892702308  | Up   | 0        | 0        | AAEL007790-PA OS=Aedes aegypti GN=AAEL007790 PE=4 SV=1                                        |
| CCG024277.1 | 2617 | 165  | 639 | 2.70921139 | 8.535857416 | 1.655663111  | Up   | 1.31E-14 | 4.67E-14 | AAEL014407-PA OS=Aedes aegypti GN=AAEL014407 PE=4 SV=1                                        |
| CCG027864.2 | 1657 | 192  | 639 | 4.97899158 | 13.48119424 | 1.437022824  | Up   | 0        | 0        | AAEL012390-PA OS=Aedes aegypti GN=AAEL012390 PE=4 SV=1                                        |
| CCG017486.1 | 954  | 9    | 640 | 0.40537485 | 23.45209343 | 5.854316297  | Up   | 1.09E-06 | 2.01E-06 | Similar to Aedes aegypti 34 kDa salivary secreted protein 34k-2 OS=Aedes albopictus PE=2 SV=1 |

|             |      |      |     |            |             |              |      |           |           |                                                                               |
|-------------|------|------|-----|------------|-------------|--------------|------|-----------|-----------|-------------------------------------------------------------------------------|
| CCG021431.1 | 2894 | 74   | 640 | 1.09874235 | 7.730925064 | 2.814787933  | Up   | 0         | 0         | AAEL000707-PA OS=Aedes aegypti GN=AAEL000707 PE=4 SV=1                        |
| CCG011681.1 | 1140 | 157  | 640 | 5.9177617  | 19.62569924 | 1.72962055   | Up   | 0         | 0         | AAEL000013-PA OS=Aedes aegypti GN=AAEL000013 PE=4 SV=1                        |
| CCG002019.1 | 1320 | 12   | 641 | 0.39063395 | 16.97595107 | 5.44153125   | Up   | 1.30E-07  | 2.49E-07  | AAEL010808-PA OS=Aedes aegypti GN=AAEL010808 PE=4 SV=1                        |
| CCG005547.1 | 1509 | 27   | 641 | 0.76884217 | 14.84973851 | 4.271606248  | Up   | 2.28E-12  | 5.40E-12  | AAEL000260-PA OS=Aedes aegypti GN=AAEL000260 PE=4 SV=1                        |
| CCG012150.1 | 1899 | 33   | 641 | 0.74670945 | 11.80002918 | 3.982099631  | Up   | 1.31E-13  | 4.00E-13  | AAEL012142-PA OS=Aedes aegypti GN=AAEL012142 PE=4 SV=1                        |
| CCG007518.1 | 732  | 41   | 641 | 2.40677475 | 30.61237078 | 3.668941746  | Up   | 1.02E-13  | 3.20E-13  | Eukaryotic translation initiation factor 6 OS=Aedes aegypti GN=EIF6 PE=3 SV=1 |
| CCG014864.1 | 1605 | 66   | 641 | 1.76697974 | 13.96152985 | 2.982099631  | Up   | 0         | 0         | AAEL008536-PA OS=Aedes aegypti GN=AAEL008536 PE=4 SV=1                        |
| CCG024498.1 | 1942 | 99   | 641 | 2.19052715 | 11.5387515  | 2.39713713   | Up   | 0         | 0         | AAEL004892-PA OS=Aedes aegypti GN=AAEL004892 PE=4 SV=1                        |
| CCG000443.1 | 1329 | 106  | 641 | 3.42723241 | 16.86098978 | 2.298573296  | Up   | 0         | 0         | AAEL000846-PA OS=Aedes aegypti GN=AAEL000846 PE=4 SV=1                        |
| CCG015967.1 | 2694 | 126  | 641 | 2.00972033 | 8.31783794  | 2.049213827  | Up   | 1.34E-13  | 4.06E-13  | AAEL007618-PA OS=Aedes aegypti GN=AAEL007618 PE=4 SV=1                        |
| CCG011074.1 | 2376 | 182  | 641 | 3.29145274 | 9.431083927 | 1.51869911   | Up   | 0         | 0         | AAEL013900-PA (Fragment) OS=Aedes aegypti GN=AAEL013900 PE=4 SV=1             |
| CCG000751.1 | 1728 | 237  | 641 | 5.89341846 | 12.9677404  | 1.137750502  | Up   | 2.32E-13  | 6.61E-13  | AAEL007399-PA OS=Aedes aegypti GN=AAEL007399 PE=4 SV=1                        |
| CCG012516.1 | 1272 | 1089 | 641 | 36.7877681 | 17.616553   | -1.062294488 | Down | 1.54E-51  | 7.22E-51  | AAEL008793-PA OS=Aedes aegypti GN=AAEL008793 PE=4 SV=1                        |
| CCG007604.1 | 5748 | 2148 | 641 | 16.0575835 | 3.898443878 | -2.042284528 | Down | 7.25E-263 | 4.49E-262 | AAEL002171-PA (Fragment) OS=Aedes aegypti GN=AAEL002171 PE=4 SV=1             |
| CCG003955.1 | 741  | 41   | 642 | 2.37754267 | 30.28773777 | 3.671190686  | Up   | 1.02E-13  | 3.19E-13  | AAEL009212-PA OS=Aedes aegypti GN=AAEL009212 PE=4 SV=1                        |

|             |      |      |     |            |             |              |      |          |            |                                                                                                                         |
|-------------|------|------|-----|------------|-------------|--------------|------|----------|------------|-------------------------------------------------------------------------------------------------------------------------|
| CCG011531.1 | 1708 | 125  | 642 | 3.14474053 | 13.14005485 | 2.062958406  | Up   | 2.35E-14 | 8.23E-14   | Phosphatidylinositol N-acetylglucosaminyl transferase subunit Q OS=Culex quinquefasciatus GN=CpipJ_CPIJ005945 PE=4 SV=1 |
| CCG002813.1 | 2193 | 19   | 643 | 0.3722868  | 10.24996442 | 4.783060618  | Up   | 7.73E-10 | 1.60E-09   | Zinc finger protein 558 OS=Culex quinquefasciatus GN=CpipJ_CPIJ018144 PE=4 SV=1                                         |
| CCG002447.1 | 852  | 77   | 643 | 3.88341498 | 26.38283094 | 2.76420159   | Up   | 0        | 0          | AAEL011057-PA OS=Aedes aegypti GN=AAEL011057 PE=4 SV=1                                                                  |
| CCG005029.1 | 1614 | 243  | 643 | 6.46942101 | 13.92699626 | 1.106175628  | Up   | 1.53E-14 | 5.41E-14   | Peptidoglycan recognition protein LE OS=Armigeres subalbus GN=PGRP-LE PE=2 SV=1                                         |
| CCG000016.1 | 3513 | 1228 | 643 | 15.0204481 | 6.398568735 | -1.231106714 | Down | 5.53E-73 | 2.76E-72   | AAEL008859-PA OS=Aedes aegypti GN=AAEL008859 PE=3 SV=1                                                                  |
| CCG005629.1 | 1398 | 99   | 644 | 3.04292112 | 16.10381276 | 2.403873462  | Up   | 0        | 0          | AGAP001363-PA OS=Anopheles gambiae GN=AgaP_AGAP001363 PE=4 SV=4                                                         |
| CCG005803.1 | 1287 | 143  | 644 | 4.77441496 | 17.49271969 | 1.873358745  | Up   | 0        | 0          | AAEL002282-PA OS=Aedes aegypti GN=AAEL002282 PE=4 SV=1                                                                  |
| CCG003153.1 | 1108 | 170  | 644 | 6.59282932 | 20.3187096  | 1.623839146  | Up   | 3.53E-13 | 9.53E-13   | AAEL004376-PA OS=Aedes aegypti GN=AAEL004376 PE=4 SV=1                                                                  |
| CCG027955.1 | 1494 | 187  | 644 | 5.37840721 | 15.06902961 | 1.486335622  | Up   | 3.31E-13 | 9.04E-13   | AAEL002819-PA OS=Aedes aegypti GN=AAEL002819 PE=4 SV=1                                                                  |
| CCG009081.1 | 759  | 30   | 645 | 1.69840848 | 29.70762651 | 4.128577959  | Up   | 3.71E-13 | 9.93E-13   | AAEL006683-PA OS=Aedes aegypti GN=AAEL006683 PE=4 SV=1                                                                  |
| CCG012282.1 | 591  | 55   | 645 | 3.99887547 | 38.15243404 | 3.254108841  | Up   | 0        | 0          | AAEL011205-PA OS=Aedes aegypti GN=AAEL011205 PE=4 SV=1                                                                  |
| CCG021312.1 | 1662 | 2    | 646 | 0.05170847 | 13.58787412 | 8.037703559  | Up   | 9.36E-05 | 0.00015326 | AAEL000889-PA (Fragment) OS=Aedes aegypti GN=AAEL000889 PE=4 SV=2                                                       |
| CCG026688.1 | 1821 | 135  | 646 | 3.18556517 | 12.40145348 | 1.960887961  | Up   | 1.90E-13 | 5.48E-13   | Putative uncharacterized protein OS=Culex quinquefasciatus GN=CpipJ_CPIJ006732 PE=4 SV=1                                |

|             |       |      |     |            |             |              |      |           |           |                                                                                                                                                |
|-------------|-------|------|-----|------------|-------------|--------------|------|-----------|-----------|------------------------------------------------------------------------------------------------------------------------------------------------|
| CCG014868.1 | 2787  | 232  | 646 | 3.57695674 | 8.102994903 | 1.179722563  | Up   | 2.91E-13  | 8.05E-13  | AAEL014406-PA OS=Aedes aegypti GN=AAEL014406 PE=4 SV=1                                                                                         |
| CCG027569.1 | 897   | 31   | 647 | 1.4850187  | 25.2151673  | 4.085738795  | Up   | 2.40E-13  | 6.78E-13  | AAEL002496-PA OS=Aedes aegypti GN=AAEL002496 PE=4 SV=1                                                                                         |
| CCG013233.1 | 630   | 72   | 647 | 4.91082681 | 35.90159535 | 2.870010104  | Up   | 0         | 0         | AAEL010760-PA OS=Aedes aegypti GN=AAEL010760 PE=4 SV=1                                                                                         |
| CCG013461.1 | 1707  | 118  | 647 | 2.97037416 | 13.25014943 | 2.157292056  | Up   | 0         | 0         | AAEL006289-PA (Fragment) OS=Aedes aegypti GN=AAEL006289 PE=4 SV=1                                                                              |
| CCG015333.1 | 1368  | 116  | 648 | 3.64363247 | 16.55918373 | 2.184182212  | Up   | 1.16E-13  | 3.58E-13  | AAEL004131-PA OS=Aedes aegypti GN=AAEL004131 PE=4 SV=1                                                                                         |
| CCG017859.1 | 1416  | 232  | 649 | 7.040239   | 16.02254352 | 1.186406877  | Up   | 2.91E-13  | 8.06E-13  | AAEL009958-PA OS=Aedes aegypti GN=AAEL009958 PE=4 SV=1                                                                                         |
| CCG022697.1 | 13984 | 1477 | 649 | 4.53849385 | 1.622420025 | -1.484066239 | Down | 4.56E-116 | 2.48E-115 | AAEL006136-PA OS=Aedes aegypti GN=AAEL006136 PE=3 SV=1                                                                                         |
| CCG013994.1 | 1002  | 4    | 650 | 0.17153587 | 22.67752485 | 7.046609112  | Up   | 2.95E-05  | 5.03E-05  | Uncharacterized protein OS=Tetrapisispora phaffii (strain ATCC 24235 / CBS 4417 / NBRC 1672 / NRRL Y-8282 / UCD 70-5) GN=TPHA0B00750 PE=4 SV=1 |
| CCG014461.1 | 1062  | 136  | 650 | 5.50271554 | 21.39630876 | 1.95914627   | Up   | 1.70E-13  | 4.99E-13  | AAEL013291-PA OS=Aedes aegypti GN=AAEL013291 PE=4 SV=1                                                                                         |
| CCG026443.1 | 1113  | 1193 | 650 | 46.0583049 | 20.41588491 | -1.173769216 | Down | 6.93E-66  | 3.39E-65  | AAEL005238-PA OS=Aedes aegypti GN=AAEL005238 PE=4 SV=1                                                                                         |
| CCG011199.1 | 2715  | 1407 | 650 | 22.2682934 | 8.369384863 | -1.411797502 | Down | 9.88E-103 | 5.25E-102 | Uncharacterized protein OS=Anopheles darlingi GN=AND_15753 PE=4 SV=1                                                                           |
| CCG017376.1 | 1275  | 140  | 651 | 4.71824537 | 17.84928485 | 1.91954392   | Up   | 0         | 0         | AAEL010427-PA OS=Aedes aegypti GN=AAEL010427 PE=4 SV=1                                                                                         |
| CCG026947.1 | 1566  | 193  | 651 | 5.29575912 | 14.53246372 | 1.4563699    | Up   | 6.08E-14  | 2.02E-13  | AAEL001157-PA OS=Aedes aegypti GN=AAEL001157 PE=4 SV=1                                                                                         |
| CCG011110.1 | 3861  | 3456 | 651 | 38.4624198 | 5.894285983 | -2.706060565 | Down | 0         | 0         | AAEL004824-PA (Fragment) OS=Aedes aegypti GN=AAEL004824 PE=4 SV=1                                                                              |

|             |      |      |     |            |             |              |      |           |           |                                                                       |
|-------------|------|------|-----|------------|-------------|--------------|------|-----------|-----------|-----------------------------------------------------------------------|
| CCG018467.1 | 984  | 23   | 652 | 1.00437388 | 23.16341103 | 4.527479402  | Up   | 4.01E-11  | 8.67E-11  | AAEL012018-PA OS=Aedes aegypti GN=AAEL012018 PE=4 SV=1                |
| CCG016823.1 | 2214 | 50   | 652 | 0.97040954 | 10.29484935 | 3.407185168  | Up   | 0         | 0         | AAEL001598-PA OS=Aedes aegypti GN=AAEL001598 PE=4 SV=1                |
| CCG022434.1 | 2445 | 139  | 652 | 2.44286017 | 9.322207139 | 1.932100285  | Up   | 1.46E-13  | 4.37E-13  | AAEL010729-PA (Fragment) OS=Aedes aegypti GN=AAEL010729 PE=4 SV=1     |
| CCG003482.1 | 1563 | 147  | 652 | 4.04129942 | 14.58272326 | 1.851369013  | Up   | 7.02E-14  | 2.29E-13  | AAEL004057-PA OS=Aedes aegypti GN=AAEL004057 PE=4 SV=1                |
| CCG013698.1 | 2718 | 1540 | 652 | 24.3463544 | 8.385870661 | -1.537673278 | Down | 2.03E-127 | 1.12E-126 | AAEL005464-PA OS=Aedes aegypti GN=AAEL005464 PE=4 SV=1                |
| CCG007283.1 | 6267 | 2049 | 652 | 14.0489846 | 3.636954916 | -1.949662911 | Down | 7.20E-236 | 4.39E-235 | AAEL000239-PA OS=Aedes aegypti GN=AAEL000239 PE=4 SV=1                |
| CCG008179.1 | 980  | 51   | 653 | 2.23618007 | 23.29362728 | 3.380827043  | Up   | 0         | 0         | AAEL006294-PA OS=Aedes aegypti GN=AAEL006294 PE=4 SV=1                |
| CCG017059.1 | 1506 | 59   | 653 | 1.68340926 | 15.15787167 | 3.170609336  | Up   | 0         | 0         | AAEL008788-PA OS=Aedes aegypti GN=AAEL008788 PE=4 SV=1                |
| CCG007338.1 | 1362 | 193  | 653 | 6.08895652 | 16.76046603 | 1.460795348  | Up   | 6.08E-14  | 2.02E-13  | AAEL007460-PA OS=Aedes aegypti GN=AAEL007460 PE=4 SV=1                |
| CCG015056.1 | 693  | 215  | 653 | 13.3311586 | 32.94048302 | 1.305059536  | Up   | 0         | 0         | AAEL013774-PA OS=Aedes aegypti GN=AAEL013774 PE=4 SV=1                |
| CCG008177.1 | 1852 | 38   | 654 | 0.88166842 | 12.34487743 | 3.807532516  | Up   | 4.26E-14  | 1.45E-13  | AAEL005783-PA OS=Aedes aegypti GN=AAEL005783 PE=4 SV=1                |
| CCG009097.1 | 1620 | 73   | 654 | 1.93629051 | 14.11278581 | 2.86563547   | Up   | 0         | 0         | AAEL014483-PA OS=Aedes aegypti GN=AAEL014483 PE=4 SV=1                |
| CCG011692.1 | 1693 | 78   | 654 | 1.97970425 | 13.50426049 | 2.77005781   | Up   | 0         | 0         | AGAP008634-PA (Fragment) OS=Anopheles gambiae GN=AGAP008634 PE=4 SV=4 |
| CCG010046.1 | 714  | 147  | 654 | 8.84671007 | 32.02060646 | 1.855787684  | Up   | 7.02E-14  | 2.29E-13  | AAEL012195-PA OS=Aedes aegypti GN=AAEL012195 PE=4 SV=1                |
| CCG026752.1 | 1128 | 148  | 654 | 5.63787298 | 20.2683626  | 1.846006664  | Up   | 0         | 0         | AAEL013389-PA OS=Aedes aegypti GN=AAEL013389 PE=4 SV=1                |
| CCG017449.1 | 1177 | 247  | 654 | 9.01743793 | 19.424565   | 1.107092798  | Up   | 0         | 0         | AAEL013207-PA OS=Aedes aegypti GN=AAEL013207 PE=4 SV=1                |

|             |       |      |     |            |             |              |      |          |            |                                                                                                |
|-------------|-------|------|-----|------------|-------------|--------------|------|----------|------------|------------------------------------------------------------------------------------------------|
| CCG007340.1 | 20582 | 1078 | 654 | 2.25057691 | 1.110811049 | -1.018681433 | Down | 9.65E-48 | 4.46E-47   | AAEL009055-PA OS=Aedes aegypti GN=AAEL009055 PE=4 SV=1                                         |
| CCG024833.1 | 1734  | 44   | 655 | 1.09035082 | 13.20511608 | 3.598232682  | Up   | 3.91E-14 | 1.34E-13   | Putative uncharacterized protein OS=Culex quinquefasciatus GN=CpipJ_CPIJ000812 PE=4 SV=1       |
| CCG021817.1 | 1140  | 52   | 655 | 1.96002298 | 20.08567657 | 3.357224582  | Up   | 0        | 0          | Cell growth-regulating nuclear protein OS=Culex quinquefasciatus GN=CpipJ_CPIJ013225 PE=4 SV=1 |
| CCG008420.1 | 1551  | 95   | 655 | 2.63193088 | 14.76316653 | 2.487808692  | Up   | 0        | 0          | AAEL012734-PA OS=Aedes aegypti GN=AAEL012734 PE=4 SV=1                                         |
| CCG014222.1 | 2374  | 113  | 655 | 2.04531593 | 9.645185883 | 2.237485338  | Up   | 1.42E-13 | 4.26E-13   | AAEL012593-PA (Fragment) OS=Aedes aegypti GN=AAEL012593 PE=4 SV=1                              |
| CCG017383.1 | 1297  | 123  | 655 | 4.07500182 | 17.65433407 | 2.115149795  | Up   | 0        | 0          | AAEL002801-PA OS=Aedes aegypti GN=AAEL002801 PE=4 SV=1                                         |
| CCG011656.2 | 3932  | 106  | 656 | 1.15839061 | 5.832306603 | 2.331944754  | Up   | 0        | 0          | AAEL000396-PA OS=Aedes aegypti GN=AAEL000396 PE=4 SV=1                                         |
| CCG024937.1 | 2190  | 191  | 656 | 3.74758873 | 10.47152035 | 1.48243638   | Up   | 6.68E-14 | 2.19E-13   | AAEL000965-PA OS=Aedes aegypti GN=AAEL000965 PE=4 SV=1                                         |
| CCG025738.1 | 2730  | 200  | 656 | 3.14796591 | 8.400230609 | 1.416009019  | Up   | 0        | 0          | AAEL000962-PA OS=Aedes aegypti GN=AAEL000962 PE=4 SV=1                                         |
| CCG007698.1 | 1144  | 225  | 656 | 8.45121529 | 20.04600486 | 1.246084017  | Up   | 0        | 0          | AAEL011189-PA OS=Aedes aegypti GN=AAEL011189 PE=4 SV=1                                         |
| CCG027695.1 | 506   | 2    | 657 | 0.16984085 | 45.3904898  | 8.062062764  | Up   | 9.36E-05 | 0.00015342 | Predicted protein OS=Nematostella vectensis GN=v1g229551 PE=3 SV=1                             |
| CCG021056.1 | 1085  | 69   | 657 | 2.7326375  | 21.16828372 | 2.953538307  | Up   | 0        | 0          | AAEL006637-PA OS=Aedes aegypti GN=AAEL006637 PE=4 SV=1                                         |
| CCG015000.1 | 1935  | 131  | 657 | 2.90906214 | 11.86955444 | 2.028639763  | Up   | 1.26E-13 | 3.87E-13   | AAEL002006-PA OS=Aedes aegypti GN=AAEL002006 PE=4 SV=1                                         |
| CCG021019.1 | 568   | 193  | 657 | 14.6006317 | 40.43589408 | 1.469605727  | Up   | 6.08E-14 | 2.02E-13   | 26S proteasome regulatory complex subunit RPN5/PSMD12 OS=Aedes aegypti GN=AAEL014325 PE=2 SV=1 |

|             |      |      |     |            |             |              |      |          |          |                                                                                                                 |
|-------------|------|------|-----|------------|-------------|--------------|------|----------|----------|-----------------------------------------------------------------------------------------------------------------|
| CCG007395.1 | 718  | 1176 | 657 | 70.3793982 | 31.9882839  | -1.137609581 | Down | 7.27E-62 | 3.53E-61 | AAEL004071-PA OS=Aedes aegypti GN=AAEL004071 PE=4 SV=1                                                          |
| CCG006258.1 | 792  | 0    | 658 | 0.001      | 29.04361883 | 14.8259336   | Up   | 4.44E-16 | 1.63E-15 | AAEL008580-PA OS=Aedes aegypti GN=AAEL008580 PE=4 SV=1                                                          |
| CCG027921.1 | 1641 | 169  | 658 | 4.42528041 | 14.01739556 | 1.663377541  | Up   | 0        | 0        | Leucokinin receptor protein OS=Aedes aegypti PE=2 SV=1                                                          |
| CCG027239.1 | 915  | 173  | 658 | 8.12433234 | 25.13939466 | 1.62962875   | Up   | 3.60E-13 | 9.69E-13 | AAEL007688-PA OS=Aedes aegypti GN=AAEL007688 PE=4 SV=1                                                          |
| CCG020856.1 | 1849 | 176  | 658 | 4.0901424  | 12.44053332 | 1.604825359  | Up   | 0        | 0        | ShfC domain-containing histone demethylation protein 3C OS=Culex quinquefasciatus GN=CpipJ_CPIJ011492 PE=4 SV=1 |
| CCG001234.1 | 816  | 208  | 658 | 10.9530696 | 28.18939475 | 1.363817259  | Up   | 3.93E-13 | 1.05E-12 | AAEL009686-PA (Fragment) OS=Aedes aegypti GN=AAEL009686 PE=4 SV=1                                               |
| CCG017745.1 | 1531 | 217  | 658 | 6.0904196  | 15.02452392 | 1.302705745  | Up   | 1.47E-13 | 4.37E-13 | AAEL010842-PA OS=Aedes aegypti GN=AAEL010842 PE=4 SV=1                                                          |
| CCG028580.1 | 2130 | 219  | 658 | 4.41801497 | 10.79931743 | 1.289469918  | Up   | 4.32E-13 | 1.14E-12 | AAEL011389-PA OS=Aedes aegypti GN=AAEL011389 PE=4 SV=1                                                          |
| CCG027182.1 | 1080 | 136  | 659 | 5.41100362 | 21.33102259 | 1.978985018  | Up   | 1.70E-13 | 4.98E-13 | AAEL008932-PA OS=Aedes aegypti GN=AAEL008932 PE=3 SV=1                                                          |
| CCG004862.2 | 4211 | 143  | 659 | 1.45919545 | 5.470791829 | 1.906576522  | Up   | 0        | 0        | AAEL001410-PA (Fragment) OS=Aedes aegypti GN=AAEL001410 PE=4 SV=1                                               |
| CCG011338.1 | 2559 | 165  | 659 | 2.77061595 | 9.002541771 | 1.700125645  | Up   | 1.31E-14 | 4.67E-14 | AAEL010280-PA OS=Aedes aegypti GN=AAEL010280 PE=4 SV=1                                                          |
| CCG013650.1 | 981  | 213  | 659 | 9.32982005 | 23.48369459 | 1.331738239  | Up   | 3.57E-13 | 9.60E-13 | AAEL003961-PA OS=Aedes aegypti GN=AAEL003961 PE=3 SV=1                                                          |
| CCG010792.1 | 909  | 259  | 659 | 12.2433017 | 25.34378921 | 1.049639571  | Up   | 0        | 0        | AAEL006735-PA OS=Aedes aegypti GN=AAEL006735 PE=2 SV=1                                                          |
| CCG013100.1 | 1739 | 45   | 660 | 1.11192528 | 13.26766111 | 3.576782322  | Up   | 0        | 0        | AAEL005286-PA OS=Aedes aegypti GN=AAEL005286 PE=4 SV=1                                                          |
| CCG012639.3 | 1624 | 234  | 660 | 6.19145191 | 14.20718145 | 1.198270698  | Up   | 4.60E-13 | 1.20E-12 | AAEL004971-PA OS=Aedes aegypti GN=AAEL004971 PE=4 SV=1                                                          |



|             |      |      |     |            |             |              |      |          |          |                                                                                   |
|-------------|------|------|-----|------------|-------------|--------------|------|----------|----------|-----------------------------------------------------------------------------------|
| CCG010695.1 | 1821 | 20   | 661 | 0.47193558 | 12.68941293 | 4.74889157   | Up   | 3.69E-10 | 7.71E-10 | AAEL007176-PA OS=Aedes aegypti GN=AAEL007176 PE=3 SV=1                            |
| CCG013550.1 | 1592 | 29   | 661 | 0.78274014 | 14.51471165 | 4.21283867   | Up   | 6.66E-13 | 1.69E-12 | AAEL000261-PA OS=Aedes aegypti GN=AAEL000261 PE=4 SV=1                            |
| CCG026930.1 | 1893 | 61   | 661 | 1.384656   | 12.20677282 | 3.140082328  | Up   | 1.75E-14 | 6.18E-14 | AAEL010730-PA OS=Aedes aegypti GN=AAEL010730 PE=4 SV=1                            |
| CCG018019.1 | 1580 | 95   | 661 | 2.58362328 | 14.62494997 | 2.500964057  | Up   | 0        | 0        | tRNA pseudouridine synthase OS=Aedes aegypti GN=AAEL007354 PE=3 SV=1              |
| CCG022838.1 | 1401 | 69   | 662 | 2.11628243 | 16.51847197 | 2.964476154  | Up   | 0        | 0        | AAEL012147-PA OS=Aedes aegypti GN=AAEL012147 PE=4 SV=1                            |
| CCG010373.1 | 1004 | 9935 | 662 | 425.203499 | 23.05017851 | -4.205303642 | Down | 0        | 0        | AAEL006070-PA OS=Aedes aegypti GN=AAEL006070 PE=3 SV=1                            |
| CCG007095.1 | 264  | 0    | 663 | 0.001      | 87.79294508 | 16.42181739  | Up   | 4.44E-16 | 1.65E-15 | -                                                                                 |
| CCG008932.1 | 1083 | 34   | 663 | 1.34900367 | 21.40105032 | 3.987715423  | Up   | 8.82E-14 | 2.80E-13 | AAEL011245-PA OS=Aedes aegypti GN=AAEL011245 PE=4 SV=1                            |
| CCG001460.1 | 807  | 35   | 663 | 1.86361922 | 28.72036865 | 3.945895247  | Up   | 6.39E-14 | 2.11E-13 | AAEL009995-PA OS=Aedes aegypti GN=AAEL009995 PE=4 SV=1                            |
| CCG015546.1 | 1508 | 49   | 663 | 1.39623143 | 15.3695872  | 3.46046842   | Up   | 0        | 0        | AAEL009023-PA OS=Aedes aegypti GN=AAEL009023 PE=4 SV=1                            |
| CCG014584.1 | 636  | 63   | 663 | 4.25643598 | 36.44235456 | 3.09789834   | Up   | 0        | 0        | AAEL005256-PA OS=Aedes aegypti GN=AAEL005256 PE=4 SV=1                            |
| CCG021068.1 | 987  | 196  | 663 | 8.53299694 | 23.48261145 | 1.46046842   | Up   | 7.93E-14 | 2.55E-13 | AGAP002890-PA OS=Anopheles gambiae GN=AgaP_AGAP002890 PE=4 SV=5                   |
| CCG006014.1 | 984  | 225  | 663 | 9.82539663 | 23.55420478 | 1.261397073  | Up   | 0        | 0        | Short-chain dehydrogenase OS=Culex quinquefasciatus GN=CpipJ_CPIJ009166 PE=3 SV=1 |
| CCG016080.1 | 1875 | 42   | 664 | 0.96252206 | 12.37989108 | 3.685035212  | Up   | 7.66E-14 | 2.48E-13 | AAEL011220-PA OS=Aedes aegypti GN=AAEL011220 PE=4 SV=1                            |
| CCG002496.1 | 1286 | 46   | 664 | 1.53702006 | 18.04999672 | 3.553790679  | Up   | 3.40E-14 | 1.18E-13 | AAEL001600-PA OS=Aedes aegypti GN=AAEL001600 PE=4 SV=1                            |
| CCG005365.1 | 546  | 99   | 664 | 7.79121562 | 42.51336223 | 2.447996015  | Up   | 0        | 0        | AAEL014307-PA OS=Aedes aegypti GN=AAEL014307 PE=4 SV=1                            |

|             |      |     |     |            |             |             |    |          |          |                                                                    |
|-------------|------|-----|-----|------------|-------------|-------------|----|----------|----------|--------------------------------------------------------------------|
| CCG023213.1 | 2073 | 187 | 664 | 3.87618928 | 11.19744128 | 1.530458175 | Up | 3.31E-13 | 9.03E-13 | AAEL000434-PA OS=Aedes aegypti GN=AAEL000434 PE=3 SV=1             |
| CCG018688.1 | 3108 | 201 | 664 | 2.77893071 | 7.468563635 | 1.426300944 | Up | 0        | 0        | AAEL014331-PA OS=Aedes aegypti GN=AAEL014331 PE=3 SV=1             |
| CCG009461.1 | 1052 | 0   | 665 | 0.001      | 22.09815024 | 14.43163799 | Up | 4.44E-16 | 1.64E-15 | AAEL015464-PA OS=Aedes aegypti GN=AAEL015464 PE=3 SV=1             |
| CCG025700.1 | 2243 | 97  | 665 | 1.85825424 | 10.36435758 | 2.479610892 | Up | 3.62E-14 | 1.25E-13 | AAEL013316-PA (Fragment) OS=Aedes aegypti GN=AAEL013316 PE=4 SV=1  |
| CCG005587.1 | 507  | 185 | 665 | 15.6792917 | 45.8525721  | 1.548142274 | Up | 0        | 0        | AAEL009995-PA OS=Aedes aegypti GN=AAEL009995 PE=4 SV=1             |
| CCG001998.1 | 408  | 5   | 666 | 0.52658988 | 57.06424591 | 6.759763476 | Up | 1.59E-05 | 2.76E-05 | Short form D7 salivary protein SD7-1 OS=Aedes albopictus PE=2 SV=1 |
| CCG013549.1 | 1616 | 41  | 666 | 1.09019747 | 14.40730961 | 3.724139566 | Up | 1.02E-13 | 3.20E-13 | AAEL000292-PA OS=Aedes aegypti GN=AAEL000292 PE=4 SV=1             |
| CCG026888.1 | 1836 | 62  | 666 | 1.45104768 | 12.68094354 | 3.127495261 | Up | 0        | 0        | AAEL000128-PA (Fragment) OS=Aedes aegypti GN=AAEL000128 PE=4 SV=1  |
| CCG010533.1 | 750  | 0   | 667 | 0.001      | 31.08956081 | 14.92414262 | Up | 4.44E-16 | 1.65E-15 | AAEL000499-PA OS=Aedes aegypti GN=SPZ1A PE=4 SV=1                  |
| CCG000408.1 | 670  | 4   | 667 | 0.25653573 | 34.80174717 | 7.083856155 | Up | 2.95E-05 | 5.03E-05 | AAEL004562-PA OS=Aedes aegypti GN=AAEL004562 PE=4 SV=1             |
| CCG013684.1 | 693  | 31  | 667 | 1.92216706 | 33.64671083 | 4.129659845 | Up | 2.40E-13 | 6.77E-13 | AAEL013774-PA OS=Aedes aegypti GN=AAEL013774 PE=4 SV=1             |
| CCG013194.1 | 1505 | 151 | 667 | 4.31124912 | 15.49313662 | 1.845451416 | Up | 0        | 0        | AAEL012260-PA OS=Aedes aegypti GN=AAEL012260 PE=4 SV=1             |
| CCG007774.1 | 1224 | 156 | 667 | 5.4765348  | 19.04997599 | 1.798453936 | Up | 1.42E-13 | 4.27E-13 | AAEL009495-PA (Fragment) OS=Aedes aegypti GN=AAEL009495 PE=4 SV=1  |
| CCG021156.1 | 2560 | 216 | 667 | 3.62557136 | 9.108269768 | 1.328968653 | Up | 1.38E-13 | 4.17E-13 | AAEL007974-PA OS=Aedes aegypti GN=AAEL007974 PE=4 SV=1             |
| CCG008789.1 | 3030 | 46  | 668 | 0.65234581 | 7.706973229 | 3.56245554  | Up | 3.40E-14 | 1.18E-13 | AAEL008509-PA OS=Aedes aegypti GN=AAEL008509 PE=3 SV=1             |
| CCG019789.1 | 2067 | 167 | 668 | 3.47167183 | 11.29759501 | 1.702313204 | Up | 1.62E-13 | 4.77E-13 | AAEL000434-PA OS=Aedes aegypti GN=AAEL000434 PE=3 SV=1             |

|             |      |      |     |            |             |              |      |           |           |                                                                                          |
|-------------|------|------|-----|------------|-------------|--------------|------|-----------|-----------|------------------------------------------------------------------------------------------|
| CCG021242.1 | 1230 | 265  | 668 | 9.25770705 | 18.98547064 | 1.036168947  | Up   | 4.94E-13  | 1.28E-12  | AAEL001874-PA OS=Aedes aegypti GN=AAEL001874 PE=4 SV=1                                   |
| CCG006000.1 | 641  | 0    | 669 | 0.001      | 36.48531538 | 15.1550283   | Up   | 4.44E-16  | 1.65E-15  | -                                                                                        |
| CCG017582.1 | 1158 | 65   | 669 | 2.41194538 | 20.1961029  | 3.065807791  | Up   | 0         | 0         | AAEL002106-PA OS=Aedes aegypti GN=AAEL002106 PE=4 SV=1                                   |
| CCG017309.1 | 2283 | 199  | 669 | 3.7455003  | 10.2440154  | 1.451550984  | Up   | 0         | 0         | AAEL002345-PA OS=Aedes aegypti GN=AAEL002345 PE=4 SV=1                                   |
| CCG003192.1 | 540  | 211  | 669 | 16.7900259 | 43.30942067 | 1.367076416  | Up   | 1.30E-13  | 3.98E-13  | AAEL000947-PA OS=Aedes aegypti GN=AAEL000947 PE=2 SV=1                                   |
| CCG001827.1 | 1373 | 234  | 670 | 7.32331966 | 17.059028   | 1.21996577   | Up   | 4.60E-13  | 1.20E-12  | AAEL001945-PA OS=Aedes aegypti GN=AAEL001945 PE=4 SV=1                                   |
| CCG000979.1 | 1071 | 24   | 671 | 0.96290722 | 21.90196425 | 4.507519659  | Up   | 1.93E-11  | 4.23E-11  | AAEL012418-PA OS=Aedes aegypti GN=AAEL012418 PE=4 SV=1                                   |
| CCG010177.2 | 681  | 63   | 671 | 3.97517369 | 34.44493937 | 3.115202237  | Up   | 0         | 0         | AAEL006473-PA OS=Aedes aegypti GN=AAEL006473 PE=4 SV=1                                   |
| CCG015444.1 | 582  | 106  | 671 | 7.82610287 | 40.30413009 | 2.364561705  | Up   | 0         | 0         | AAEL011841-PA OS=Aedes aegypti GN=AAEL011841 PE=3 SV=1                                   |
| CCG011501.1 | 3310 | 231  | 671 | 2.99879417 | 7.086708071 | 1.240733119  | Up   | 1.29E-13  | 3.97E-13  | Putative uncharacterized protein OS=Culex quinquefasciatus GN=CpipJ_CPIJ001501 PE=4 SV=1 |
| CCG028033.1 | 678  | 1582 | 671 | 100.262714 | 34.59735061 | -1.535051724 | Down | 1.63E-130 | 9.06E-130 | AAEL005593-PA OS=Aedes aegypti GN=AAEL005593 PE=4 SV=1                                   |
| CCG016495.1 | 597  | 4152 | 671 | 298.844787 | 39.29146351 | -2.927108568 | Down | 0         | 0         | -                                                                                        |
| CCG026259.1 | 783  | 49   | 672 | 2.68903831 | 30.00250574 | 3.479920782  | Up   | 0         | 0         | Proliferating cell nuclear antigen OS=Aedes aegypti GN=PCNA PE=2 SV=1                    |
| CCG012890.1 | 2695 | 119  | 672 | 1.8973649  | 8.716869013 | 2.199812863  | Up   | 0         | 0         | AAEL009500-PA OS=Aedes aegypti GN=AAEL009500 PE=4 SV=1                                   |
| CCG028556.1 | 2796 | 125  | 672 | 1.92103606 | 8.401989267 | 2.128846342  | Up   | 2.35E-14  | 8.22E-14  | AAEL010497-PA OS=Aedes aegypti GN=AAEL010497 PE=4 SV=1                                   |
| CCG011512.1 | 1468 | 160  | 672 | 4.68334982 | 16.0026989  | 1.772702532  | Up   | 4.24E-14  | 1.45E-13  | Putative uncharacterized protein OS=Culex quinquefasciatus GN=CpipJ_CPIJ014088 PE=4 SV=1 |
| CCG019649.1 | 849  | 158  | 673 | 7.99672328 | 27.71133129 | 1.79299515   | Up   | 0         | 0         | AAEL005401-PA OS=Aedes aegypti GN=AAEL005401 PE=4 SV=1                                   |

|             |      |      |     |            |             |              |      |           |           |                                                                         |
|-------------|------|------|-----|------------|-------------|--------------|------|-----------|-----------|-------------------------------------------------------------------------|
| CCG023211.1 | 453  | 209  | 673 | 19.8248886 | 51.93580633 | 1.389416766  | Up   | 0         | 0         | Putative salivary secreted peptide<br>OS=Aedes albopictus PE=2 SV=1     |
| CCG002520.1 | 1269 | 110  | 674 | 3.72472089 | 18.56728018 | 2.317558271  | Up   | 0         | 0         | AAEL001492-PA OS=Aedes<br>aegypti GN=AAEL001492 PE=4<br>SV=1            |
| CCG014826.1 | 1092 | 215  | 674 | 8.46015837 | 21.57681185 | 1.350725135  | Up   | 0         | 0         | AAEL010247-PA OS=Aedes<br>aegypti GN=AAEL010247 PE=4<br>SV=1            |
| CCG000447.1 | 831  | 1111 | 674 | 57.4481049 | 28.35364446 | -1.018725116 | Down | 3.75E-49  | 1.74E-48  | AAEL000545-PA OS=Aedes<br>aegypti GN=CTLMA11 PE=4<br>SV=1               |
| CCG012596.1 | 651  | 43   | 675 | 2.83824668 | 36.24706117 | 3.674792141  | Up   | 8.46E-14  | 2.71E-13  | AAEL013066-PA (Fragment)<br>OS=Aedes aegypti<br>GN=AAEL013066 PE=4 SV=1 |
| CCG023127.1 | 2612 | 1333 | 675 | 21.9290414 | 9.034011034 | -1.279404169 | Down | 6.65E-84  | 3.40E-83  | AAEL011863-PA (Fragment)<br>OS=Aedes aegypti<br>GN=AAEL011863 PE=4 SV=1 |
| CCG024745.1 | 1030 | 15   | 676 | 0.62577283 | 22.94349039 | 5.196302044  | Up   | 1.48E-08  | 2.92E-08  | AAEL009880-PA OS=Aedes<br>aegypti GN=AAEL009880 PE=4<br>SV=1            |
| CCG019674.1 | 4149 | 156  | 676 | 1.61563717 | 5.695780935 | 1.817790421  | Up   | 1.42E-13  | 4.27E-13  | AAEL008592-PA OS=Aedes<br>aegypti GN=AAEL008592 PE=3<br>SV=1            |
| CCG018806.1 | 1556 | 166  | 676 | 4.58417477 | 15.18752898 | 1.728153209  | Up   | 1.83E-13  | 5.32E-13  | AAEL012390-PA OS=Aedes<br>aegypti GN=AAEL012390 PE=4<br>SV=1            |
| CCG018121.1 | 918  | 177  | 676 | 8.28501419 | 25.74269619 | 1.63558709   | Up   | 0         | 0         | AAEL001451-PA OS=Aedes<br>aegypti GN=AAEL001451 PE=4<br>SV=1            |
| CCG007137.1 | 1142 | 193  | 676 | 7.2619604  | 20.69334072 | 1.510735603  | Up   | 6.08E-14  | 2.02E-13  | -                                                                       |
| CCG002047.2 | 1515 | 1592 | 676 | 45.1536749 | 15.59854462 | -1.53343198  | Down | 4.00E-131 | 2.23E-130 | AAEL009099-PA OS=Aedes<br>aegypti GN=AAEL009099 PE=4<br>SV=1            |
| CCG017694.1 | 2043 | 2837 | 677 | 59.6696706 | 11.58431394 | -2.364825208 | Down | 0         | 0         | AAEL007103-PA OS=Aedes<br>aegypti GN=AAEL007103 PE=4<br>SV=1            |
| CCG008317.1 | 1746 | 108  | 678 | 2.65792173 | 13.57486349 | 2.352567165  | Up   | 0         | 0         | AAEL013211-PA OS=Aedes<br>aegypti GN=AAEL013211 PE=4<br>SV=1            |
| CCG010619.1 | 2172 | 124  | 678 | 2.45315244 | 10.91239026 | 2.153258357  | Up   | 1.61E-13  | 4.77E-13  | AAEL009924-PA OS=Aedes<br>aegypti GN=AAEL009924 PE=4<br>SV=1            |
| CCG018768.2 | 2128 | 166  | 678 | 3.35196238 | 11.13802239 | 1.732415236  | Up   | 1.83E-13  | 5.32E-13  | AAEL011701-PA OS=Aedes<br>aegypti GN=AAEL011701 PE=4<br>SV=1            |
| CCG005464.1 | 930  | 230  | 678 | 10.6269236 | 25.48571145 | 1.261964616  | Up   | 3.85E-13  | 1.03E-12  | AAEL009110-PA OS=Aedes<br>aegypti GN=AAEL009110 PE=4<br>SV=1            |

|             |      |      |     |            |             |              |      |           |           |                                                                           |
|-------------|------|------|-----|------------|-------------|--------------|------|-----------|-----------|---------------------------------------------------------------------------|
| CCG009107.1 | 669  | 252  | 678 | 16.185909  | 35.42856749 | 1.130174743  | Up   | 5.42E-14  | 1.81E-13  | AAEL014029-PA OS=Aedes aegypti GN=AAEL014029 PE=3 SV=1                    |
| CCG003979.1 | 927  | 252  | 678 | 11.6810929 | 25.56818948 | 1.130174743  | Up   | 5.42E-14  | 1.81E-13  | AAEL009735-PA OS=Aedes aegypti GN=AAEL009735 PE=4 SV=1                    |
| CCG016063.1 | 1268 | 51   | 679 | 1.72827797 | 18.71977124 | 3.437155626  | Up   | 0         | 0         | AAEL004943-PA OS=Aedes aegypti GN=AAEL004943 PE=4 SV=1                    |
| CCG000193.1 | 1563 | 142  | 679 | 3.90384025 | 15.18660904 | 1.959833849  | Up   | 2.62E-13  | 7.35E-13  | AAEL008613-PA OS=Aedes aegypti GN=AAEL008613 PE=4 SV=1                    |
| CCG017030.1 | 603  | 183  | 679 | 13.0405662 | 39.36429507 | 1.59388113   | Up   | 3.05E-13  | 8.41E-13  | AAEL003774-PA OS=Aedes aegypti GN=AAEL003774 PE=4 SV=1                    |
| CCG019074.1 | 1176 | 0    | 680 | 0.001      | 20.21396956 | 14.30306504  | Up   | 4.44E-16  | 1.65E-15  | AAEL005606-PA OS=Aedes aegypti GN=AAEL005606 PE=4 SV=1                    |
| CCG010726.2 | 1959 | 158  | 680 | 3.46565496 | 12.13457285 | 1.807923392  | Up   | 0         | 0         | AAEL006074-PA OS=Aedes aegypti GN=AAEL006074 PE=4 SV=1                    |
| CCG006223.1 | 1805 | 199  | 680 | 4.73738348 | 13.16987712 | 1.475079519  | Up   | 0         | 0         | AAEL011781-PA OS=Aedes aegypti GN=AAEL011781 PE=4 SV=1                    |
| CCG022868.1 | 3390 | 1761 | 680 | 22.3214462 | 7.012279707 | -1.670475054 | Down | 6.26E-164 | 3.61E-163 | AAEL012616-PA OS=Aedes aegypti GN=AAEL012616 PE=4 SV=1                    |
| CCG004056.1 | 1149 | 82   | 681 | 3.06659551 | 20.71939642 | 2.756272187  | Up   | 0         | 0         | -                                                                         |
| CCG007692.1 | 1479 | 115  | 681 | 3.34112203 | 16.09640736 | 2.268334141  | Up   | 6.13E-14  | 2.03E-13  | AAEL012520-PA OS=Aedes aegypti GN=AAEL012520 PE=4 SV=1                    |
| CCG018303.1 | 1206 | 210  | 681 | 7.4822921  | 19.74012146 | 1.399578674  | Up   | 0         | 0         | AAEL002107-PA OS=Aedes aegypti GN=AAEL002107 PE=4 SV=1                    |
| CCG009518.1 | 1127 | 1144 | 682 | 43.6179027 | 21.15487556 | -1.043930204 | Down | 1.42E-52  | 6.71E-52  | AAEL007908-PA OS=Aedes aegypti GN=AAEL007908 PE=4 SV=1                    |
| CCG004536.1 | 2897 | 1943 | 682 | 28.8195355 | 8.22973585  | -1.808129053 | Down | 6.14E-202 | 3.67E-201 | AAEL013788-PA OS=Aedes aegypti GN=AAEL013788 PE=4 SV=1                    |
| CCG011670.1 | 2541 | 48   | 683 | 0.81170691 | 9.396498637 | 3.533092471  | Up   | 5.35E-14  | 1.79E-13  | AAEL004368-PA OS=Aedes aegypti GN=AAEL004368 PE=4 SV=1                    |
| CCG007349.1 | 1110 | 112  | 683 | 4.33568493 | 21.5103631  | 2.31070005   | Up   | 0         | 0         | Fanconi anemia group J protein OS=Danaus plexippus GN=KGM_13519 PE=4 SV=1 |
| CCG004791.1 | 1176 | 175  | 683 | 6.39430575 | 20.30314884 | 1.66684386   | Up   | 3.55E-13  | 9.58E-13  | AAEL008743-PA OS=Aedes aegypti GN=AAEL008743 PE=4 SV=1                    |

|             |       |      |     |            |             |              |      |           |           |                                                                                          |
|-------------|-------|------|-----|------------|-------------|--------------|------|-----------|-----------|------------------------------------------------------------------------------------------|
| CCG015157.1 | 2261  | 216  | 683 | 4.10502551 | 10.56015172 | 1.36316747   | Up   | 1.38E-13  | 4.17E-13  | AGAP006748-PA OS=Anopheles gambiae GN=AGAP006748 PE=4 SV=2                               |
| CCG026234.1 | 2211  | 236  | 683 | 4.58654788 | 10.79896112 | 1.235411923  | Up   | 4.60E-13  | 1.20E-12  | AAEL005499-PA OS=Aedes aegypti GN=AAEL005499 PE=3 SV=1                                   |
| CCG018888.1 | 40924 | 1219 | 683 | 1.27993614 | 0.583435222 | -1.133427439 | Down | 1.09E-63  | 5.29E-63  | AAEL011412-PA OS=Aedes aegypti GN=AAEL011412 PE=4 SV=1                                   |
| CCG006192.1 | 2916  | 37   | 684 | 0.5452264  | 8.200089613 | 3.910712353  | Up   | 5.17E-14  | 1.74E-13  | WU-repeat protein OS=Culex quinquefasciatus GN=CpipJ_CPIJ011019 PE=4 SV=1                |
| CCG009605.1 | 1623  | 177  | 684 | 4.68616329 | 14.7328782  | 1.652560169  | Up   | 0         | 0         | AAEL005584-PA OS=Aedes aegypti GN=AAEL005584 PE=4 SV=1                                   |
| CCG000331.1 | 2522  | 1728 | 684 | 29.4415945 | 9.481150401 | -1.634721783 | Down | 5.43E-156 | 3.11E-155 | AAEL005977-PA OS=Aedes aegypti GN=AAEL005977 PE=4 SV=1                                   |
| CCG012860.1 | 1902  | 65   | 685 | 1.46847148 | 12.59012597 | 3.099905569  | Up   | 0         | 0         | AAEL002921-PA OS=Aedes aegypti GN=AAEL002921 PE=4 SV=1                                   |
| CCG007966.1 | 774   | 176  | 685 | 9.77089573 | 30.9385266  | 1.662841763  | Up   | 0         | 0         | AAEL002235-PA OS=Aedes aegypti GN=AAEL002235 PE=4 SV=1                                   |
| CCG016668.1 | 1343  | 38   | 686 | 1.21582272 | 17.85657324 | 3.876450457  | Up   | 4.26E-14  | 1.45E-13  | AAEL000436-PA OS=Aedes aegypti GN=AAEL000436 PE=4 SV=1                                   |
| CCG004869.1 | 1924  | 110  | 686 | 2.45668961 | 12.46433361 | 2.343018256  | Up   | 0         | 0         | AAEL007661-PA OS=Aedes aegypti GN=AAEL007661 PE=3 SV=1                                   |
| CCG008875.1 | 849   | 157  | 686 | 7.94611111 | 28.24661704 | 1.829757221  | Up   | 0         | 0         | AAEL009220-PA OS=Aedes aegypti GN=AAEL009220 PE=4 SV=1                                   |
| CCG017772.1 | 2568  | 206  | 686 | 3.44694912 | 9.338542783 | 1.437877443  | Up   | 1.10E-13  | 3.44E-13  | AAEL006226-PA OS=Aedes aegypti GN=AAEL006226 PE=4 SV=1                                   |
| CCG009263.1 | 2307  | 214  | 686 | 3.9859225  | 10.39504892 | 1.382910984  | Up   | 0         | 0         | AAEL003205-PA OS=Aedes aegypti GN=AAEL003205 PE=4 SV=1                                   |
| CCG003462.1 | 3384  | 231  | 686 | 2.9332177  | 7.086695587 | 1.272628929  | Up   | 1.29E-13  | 3.97E-13  | Putative uncharacterized protein OS=Culex quinquefasciatus GN=CpipJ_CPIJ001735 PE=4 SV=1 |
| CCG019227.1 | 2094  | 67   | 687 | 1.37486734 | 11.46911946 | 3.060390302  | Up   | 0         | 0         | AAEL001933-PA OS=Aedes aegypti GN=AAEL001933 PE=4 SV=1                                   |
| CCG012968.1 | 1683  | 78   | 687 | 1.9914672  | 14.26995612 | 2.841077274  | Up   | 0         | 0         | AAEL013862-PA OS=Aedes aegypti GN=AAEL013862 PE=3 SV=1                                   |

|             |      |      |     |            |             |              |      |          |            |                                                                                                                           |
|-------------|------|------|-----|------------|-------------|--------------|------|----------|------------|---------------------------------------------------------------------------------------------------------------------------|
| CCG024274.1 | 1771 | 102  | 687 | 2.47482379 | 13.56088997 | 2.454054151  | Up   | 0        | 0          | AAEL008538-PA OS=Aedes aegypti GN=AAEL008538 PE=4 SV=1                                                                    |
| CCG010443.1 | 2163 | 160  | 687 | 3.17852868 | 11.10325296 | 1.804551398  | Up   | 4.24E-14 | 1.45E-13   | AAEL007462-PA OS=Aedes aegypti GN=AAEL007462 PE=4 SV=1                                                                    |
| CCG006893.1 | 1011 | 173  | 687 | 7.35288238 | 23.7550308  | 1.691851265  | Up   | 3.60E-13 | 9.69E-13   | AAEL014237-PA OS=Aedes aegypti GN=AAEL014237 PE=4 SV=1                                                                    |
| CCG023914.1 | 1978 | 2973 | 687 | 64.5849449 | 12.14172707 | -2.411224255 | Down | 0        | 0          | AAEL003837-PA OS=Aedes aegypti GN=AAEL003837 PE=4 SV=1                                                                    |
| CCG024611.1 | 1395 | 29   | 688 | 0.89327764 | 17.24107127 | 4.270596963  | Up   | 6.66E-13 | 1.69E-12   | AAEL009023-PA OS=Aedes aegypti GN=AAEL009023 PE=4 SV=1                                                                    |
| CCG001902.1 | 1864 | 39   | 688 | 0.89904488 | 12.90305495 | 3.84317574   | Up   | 7.33E-14 | 2.38E-13   | AAEL012568-PA OS=Aedes aegypti GN=AAEL012568 PE=4 SV=1                                                                    |
| CCG024552.1 | 1737 | 82   | 688 | 2.02850791 | 13.8464562  | 2.771025954  | Up   | 0        | 0          | AAEL003338-PA OS=Aedes aegypti GN=AAEL003338 PE=4 SV=1                                                                    |
| CCG004151.1 | 1848 | 95   | 688 | 2.20894198 | 13.01476971 | 2.55872235   | Up   | 0        | 0          | AAEL006988-PA OS=Aedes aegypti GN=AAEL006988 PE=4 SV=1                                                                    |
| CCG004175.1 | 810  | 105  | 688 | 5.57015078 | 29.69295607 | 2.414332441  | Up   | 0        | 0          | AAEL005304-PA OS=Aedes aegypti GN=AAEL005304 PE=4 SV=1                                                                    |
| CCG022995.1 | 2205 | 158  | 688 | 3.07901046 | 10.90761652 | 1.82479721   | Up   | 0        | 0          | AAEL005067-PA OS=Aedes aegypti GN=AAEL005067 PE=4 SV=1                                                                    |
| CCG003031.1 | 444  | 263  | 688 | 25.4527932 | 54.16958203 | 1.089658969  | Up   | 1.40E-14 | 4.97E-14   | AAEL008768-PA OS=Aedes aegypti GN=AAEL008768 PE=2 SV=1                                                                    |
| CCG010650.1 | 446  | 1    | 689 | 0.0963447  | 54.00505089 | 9.130673377  | Up   | 0.000587 | 0.00091723 | Chromosome undetermined SCAF14565, whole genome shotgun sequence OS=Tetraodon nigroviridis GN=GSTENG00016696001 PE=3 SV=1 |
| CCG018006.1 | 3864 | 77   | 689 | 0.85628094 | 6.233502251 | 2.863886836  | Up   | 0        | 0          | AAEL008021-PA OS=Aedes aegypti GN=AAEL008021 PE=4 SV=1                                                                    |
| CCG013301.1 | 5388 | 99   | 689 | 0.78953299 | 4.47035128  | 2.501316756  | Up   | 0        | 0          | AAEL007856-PA OS=Aedes aegypti GN=AAEL007856 PE=4 SV=1                                                                    |
| CCG004284.1 | 2817 | 122  | 689 | 1.86095407 | 8.550320446 | 2.199936039  | Up   | 8.04E-14 | 2.58E-13   | AAEL005719-PA OS=Aedes aegypti GN=AAEL005719 PE=4 SV=1                                                                    |

|             |      |      |     |            |             |              |      |          |          |                                                                                          |
|-------------|------|------|-----|------------|-------------|--------------|------|----------|----------|------------------------------------------------------------------------------------------|
| CCG021765.1 | 1999 | 155  | 689 | 3.33182034 | 12.04915092 | 1.854548971  | Up   | 3.42E-13 | 9.26E-13 | AAEL011420-PA OS=Aedes aegypti GN=AAEL011420 PE=4 SV=1                                   |
| CCG022427.1 | 3390 | 29   | 690 | 0.3675877  | 7.115401467 | 4.27478476   | Up   | 6.66E-13 | 1.69E-12 | AAEL008126-PA OS=Aedes aegypti GN=GPRCIR PE=4 SV=2                                       |
| CCG006646.1 | 1580 | 43   | 690 | 1.16942949 | 15.26658922 | 3.706501001  | Up   | 8.46E-14 | 2.70E-13 | AAEL013540-PA OS=Aedes aegypti GN=AAEL013540 PE=4 SV=1                                   |
| CCG019326.1 | 264  | 63   | 690 | 10.2541412 | 91.36822338 | 3.155485832  | Up   | 0        | 0        | AAEL007125-PA OS=Aedes aegypti GN=AAEL007125 PE=4 SV=1                                   |
| CCG017408.1 | 1074 | 232  | 690 | 9.28210282 | 22.45922809 | 1.27478476   | Up   | 2.91E-13 | 8.05E-13 | AAEL008700-PA OS=Aedes aegypti GN=AAEL008700 PE=4 SV=1                                   |
| CCG011162.1 | 835  | 1126 | 690 | 57.9448158 | 28.88767781 | -1.004225357 | Down | 1.16E-48 | 5.37E-48 | AAEL006619-PA OS=Aedes aegypti GN=AAEL006619 PE=4 SV=1                                   |
| CCG005498.1 | 774  | 14   | 691 | 0.77723034 | 31.20952099 | 5.327500182  | Up   | 3.07E-08 | 6.01E-08 | AAEL013692-PA OS=Aedes aegypti GN=PIWI3 PE=4 SV=1                                        |
| CCG026182.1 | 1756 | 36   | 691 | 0.8809285  | 13.75636062 | 3.964930103  | Up   | 6.13E-14 | 2.03E-13 | Putative uncharacterized protein OS=Culex quinquefasciatus GN=CpipJ_CPIJ013877 PE=4 SV=1 |
| CCG027958.1 | 8953 | 188  | 691 | 0.90230203 | 2.69810893  | 1.580266253  | Up   | 1.80E-13 | 5.25E-13 | AAEL007980-PA OS=Aedes aegypti GN=AAEL007980 PE=4 SV=1                                   |
| CCG008226.1 | 1605 | 59   | 692 | 1.5795728  | 15.0723536  | 3.254298382  | Up   | 0        | 0        | AAEL003172-PA OS=Aedes aegypti GN=AAEL003172 PE=4 SV=1                                   |
| CCG012478.1 | 1110 | 83   | 692 | 3.21305223 | 21.79380858 | 2.761902     | Up   | 1.32E-13 | 4.01E-13 | AAEL013006-PA OS=Aedes aegypti GN=AAEL013006 PE=4 SV=1                                   |
| CCG013910.1 | 1524 | 119  | 692 | 3.35524831 | 15.87344326 | 2.242123668  | Up   | 0        | 0        | AAEL002784-PA OS=Aedes aegypti GN=AAEL002784 PE=4 SV=1                                   |
| CCG025942.1 | 1942 | 62   | 693 | 1.37184529 | 12.47481246 | 3.184828436  | Up   | 0        | 0        | AAEL009281-PA OS=Aedes aegypti GN=AAEL009281 PE=4 SV=1                                   |
| CCG002709.1 | 1757 | 76   | 693 | 1.85867947 | 13.7883243  | 2.891097233  | Up   | 0        | 0        | AAEL007573-PA OS=Aedes aegypti GN=AAEL007573 PE=4 SV=1                                   |
| CCG005254.1 | 1005 | 143  | 693 | 6.11410154 | 24.10555801 | 1.979153409  | Up   | 0        | 0        | AAEL012749-PA OS=Aedes aegypti GN=AAEL012749 PE=4 SV=1                                   |
| CCG011884.2 | 1176 | 148  | 693 | 5.40775572 | 20.6004131  | 1.92957138   | Up   | 0        | 0        | AAEL000204-PA OS=Aedes aegypti GN=AAEL000204 PE=4 SV=1                                   |
| CCG002435.1 | 3561 | 276  | 693 | 3.33042593 | 6.803169279 | 1.030500289  | Up   | 0        | 0        | AAEL011162-PA OS=Aedes aegypti GN=AAEL011162 PE=4 SV=1                                   |



|             |      |      |     |            |             |              |      |          |          |                                                                                                |
|-------------|------|------|-----|------------|-------------|--------------|------|----------|----------|------------------------------------------------------------------------------------------------|
| CCG001503.1 | 1905 | 59   | 694 | 1.33082118 | 12.73545621 | 3.258462007  | Up   | 0        | 0        | Predicted protein OS=Culex quinquefasciatus<br>GN=CpipJ_CPIJ006823 PE=4<br>SV=1                |
| CCG026312.2 | 4572 | 157  | 694 | 1.47555738 | 5.306440087 | 1.846484308  | Up   | 0        | 0        | AAEL007215-PA OS=Aedes aegypti GN=AAEL007215 PE=4<br>SV=1                                      |
| CCG013155.2 | 1242 | 201  | 694 | 6.95403918 | 19.53385192 | 1.490053365  | Up   | 0        | 0        | AAEL004449-PA OS=Aedes aegypti GN=AAEL004449 PE=4<br>SV=1                                      |
| CCG016305.1 | 831  | 220  | 694 | 11.3758624 | 29.19499889 | 1.359745343  | Up   | 4.61E-13 | 1.20E-12 | AAEL006001-PA OS=Aedes aegypti GN=AAEL006001 PE=4<br>SV=1                                      |
| CCG028399.1 | 2207 | 226  | 694 | 4.40016313 | 10.99277031 | 1.320926094  | Up   | 2.04E-14 | 7.16E-14 | AAEL006449-PA OS=Aedes aegypti GN=AAEL006449 PE=4<br>SV=1                                      |
| CCG027466.1 | 2426 | 243  | 694 | 4.30405833 | 10.00043037 | 1.216292553  | Up   | 1.53E-14 | 5.41E-14 | AAEL011370-PA OS=Aedes aegypti GN=AAEL011370 PE=4<br>SV=1                                      |
| CCG000807.1 | 3967 | 277  | 694 | 3.00040748 | 6.115715674 | 1.02736289   | Up   | 0        | 0        | AAEL012583-PA (Fragment)<br>OS=Aedes aegypti<br>GN=AAEL012583 PE=4 SV=1                        |
| CCG019780.1 | 2487 | 2610 | 694 | 45.0948964 | 9.755144383 | -2.208729035 | Down | 0        | 0        | AAEL003129-PA OS=Aedes aegypti GN=AAEL003129 PE=4<br>SV=1                                      |
| CCG019334.1 | 411  | 5206 | 694 | 544.283305 | 59.02930433 | -3.20485454  | Down | 0        | 0        | AAEL013613-PA OS=Aedes aegypti GN=AAEL013613 PE=4<br>SV=1                                      |
| CCG013418.2 | 1578 | 145  | 695 | 3.94842302 | 15.39670618 | 1.963273281  | Up   | 0        | 0        | AAEL007208-PA OS=Aedes aegypti GN=AAEL007208 PE=4<br>SV=1                                      |
| CCG014737.1 | 792  | 201  | 695 | 10.9051978 | 30.67677065 | 1.49213068   | Up   | 0        | 0        | AAEL006845-PA OS=Aedes aegypti GN=AAEL006845 PE=4<br>SV=1                                      |
| CCG027485.1 | 986  | 241  | 695 | 10.5027445 | 24.64097602 | 1.230293035  | Up   | 2.37E-13 | 6.72E-13 | AAEL000184-PA OS=Aedes aegypti GN=AAEL000184 PE=4<br>SV=1                                      |
| CCG026708.2 | 2280 | 79   | 696 | 1.48886361 | 10.67147396 | 2.841475951  | Up   | 0        | 0        | AAEL013110-PA OS=Aedes aegypti GN=AAEL013110 PE=4<br>SV=1                                      |
| CCG020432.1 | 1041 | 134  | 696 | 5.53116661 | 23.37268072 | 2.079167509  | Up   | 0        | 0        | RNA-interacting protein alpha<br>OS=Culex quinquefasciatus<br>GN=CpipJ_CPIJ008848 PE=4<br>SV=1 |
| CCG011787.1 | 906  | 178  | 696 | 8.44217744 | 26.85536494 | 1.669523269  | Up   | 1.15E-13 | 3.57E-13 | AAEL012917-PA (Fragment)<br>OS=Aedes aegypti<br>GN=AAEL012917 PE=4 SV=1                        |

|             |      |      |     |            |             |              |      |          |            |                                                              |
|-------------|------|------|-----|------------|-------------|--------------|------|----------|------------|--------------------------------------------------------------|
| CCG008624.1 | 2244 | 240  | 696 | 4.59569354 | 10.84267408 | 1.238366104  | Up   | 0        | 0          | AAEL007251-PA OS=Redes<br>SV-1<br>aegypti GN=AAEL007251 PE=4 |
| CCG020281.1 | 561  | 7513 | 696 | 575.457426 | 43.37069632 | -3.729916687 | Down | 0        | 0          | AAEL008490-PA OS=Redes<br>SV-1<br>aegypti GN=AAEL008490 PE=4 |
| CCG004951.1 | 465  | 4    | 697 | 0.36963213 | 52.39982561 | 7.14732805   | Up   | 2.95E-05 | 5.03E-05   | AAEL002047-PA OS=Redes<br>SV-1<br>aegypti GN=AAEL002047 PE=2 |
| CCG003067.1 | 1584 | 104  | 697 | 2.8212452  | 15.38252456 | 2.446888332  | Up   | 0        | 0          | -                                                            |
| CCG014887.1 | 558  | 115  | 697 | 8.85576968 | 43.66652134 | 2.301837999  | Up   | 6.13E-14 | 2.03E-13   | AAEL013176-PA OS=Redes<br>SV-1<br>aegypti GN=AAEL013176 PE=4 |
| CCG015132.1 | 2100 | 130  | 697 | 2.66003119 | 11.60281853 | 2.124960237  | Up   | 0        | 0          | AAEL011415-PA OS=Redes<br>SV-1<br>aegypti GN=AAEL011415 PE=4 |
| CCG027193.1 | 1905 | 145  | 697 | 3.27066221 | 12.79050861 | 1.96741896   | Up   | 0        | 0          | AAEL003679-PA OS=Redes<br>SV-1<br>aegypti GN=AAEL003679 PE=4 |
| CCG023761.1 | 439  | 3369 | 697 | 329.760902 | 55.50323214 | -2.570776663 | Down | 0        | 0          | -                                                            |
| CCG013230.1 | 481  | 0    | 698 | 0.001      | 50.7294744  | 15.63053659  | Up   | 4.44E-16 | 1.63E-15   | -                                                            |
| CCG018501.1 | 1558 | 0    | 698 | 0.001      | 15.661667   | 13.93495016  | Up   | 4.44E-16 | 1.64E-15   | AAEL005916-PA OS=Redes<br>SV-1<br>aegypti GN=AAEL005916 PE=4 |
| CCG006500.1 | 1992 | 97   | 698 | 2.09240174 | 12.24943634 | 2.549483588  | Up   | 3.62E-14 | 1.25E-13   | AAEL012392-PA OS=Redes<br>SV-1<br>aegypti GN=AAEL012392 PE=4 |
| CCG019959.1 | 1797 | 130  | 698 | 3.10855064 | 13.57867401 | 2.127028617  | Up   | 0        | 0          | AAEL008897-PA OS=Redes<br>SV-1<br>aegypti GN=AAEL008897 PE=4 |
| CCG020844.1 | 612  | 137  | 698 | 9.6190419  | 39.87071436 | 2.051364347  | Up   | 2.90E-13 | 8.03E-13   | AAEL014324-PA OS=Redes<br>SV-1<br>aegypti GN=AAEL014324 PE=4 |
| CCG007731.1 | 888  | 183  | 698 | 8.85524936 | 27.4784653  | 1.633696592  | Up   | 3.05E-13 | 8.41E-13   | AAEL006956-PA OS=Redes<br>SV-1<br>aegypti GN=AAEL006956 PE=4 |
| CCG021791.2 | 710  | 208  | 698 | 12.5883166 | 34.36743266 | 1.448956712  | Up   | 3.93E-13 | 1.05E-12   | AAEL006628-PA OS=Redes<br>SV-1<br>aegypti GN=AAEL006628 PE=4 |
| CCG017133.1 | 1329 | 2    | 699 | 0.06466476 | 18.38663316 | 8.151461849  | Up   | 9.36E-05 | 0.00015344 | AAEL009987-PA OS=Redes<br>SV-1<br>aegypti GN=AAEL009987 PE=4 |
| CCG000229.1 | 741  | 67   | 699 | 3.88525266 | 32.97683598 | 3.085372659  | Up   | 0        | 0          | AAEL003360-PA OS=Redes<br>SV-1<br>aegypti GN=AAEL003360 PE=4 |
| CCG018116.1 | 2134 | 87   | 699 | 1.75181205 | 11.45071952 | 2.708518353  | Up   | 0        | 0          | AAEL003273-PA OS=Redes<br>SV-1<br>aegypti GN=AAEL003273 PE=4 |
| CCG006585.1 | 981  | 1203 | 699 | 52.6937724 | 24.90910853 | -1.080959078 | Down | 2.43E-58 | 1.16E-57   | AAEL006065-PA OS=Redes<br>SV-1<br>aegypti GN=AAEL006065 PE=3 |

|             |       |      |     |            |             |              |      |          |          |                                                                                           |
|-------------|-------|------|-----|------------|-------------|--------------|------|----------|----------|-------------------------------------------------------------------------------------------|
| CCG012429.1 | 1027  | 98   | 700 | 4.10032521 | 23.82745252 | 2.538814472  | Up   | 0        | 0        | Dihydrodipicolate reductase OS=Culex quinquefasciatus<br>GN=CpipJ_CPIJ002390 PE=4<br>SV=1 |
| CCG026004.1 | 990   | 116  | 700 | 5.03483759 | 24.71797348 | 2.295543321  | Up   | 1.16E-13 | 3.58E-13 | AAEL012874-PA OS=Aedes aegypti GN=AAEL012874 PE=4<br>SV=1                                 |
| CCG019330.1 | 2688  | 155  | 700 | 2.47779348 | 9.103717909 | 1.87739991   | Up   | 3.42E-13 | 9.27E-13 | AAEL007130-PA OS=Aedes aegypti GN=AAEL007130 PE=3<br>SV=1                                 |
| CCG003110.1 | 1311  | 210  | 700 | 6.88302385 | 18.66574656 | 1.439278798  | Up   | 0        | 0        | AAEL002102-PA OS=Aedes aegypti GN=AAEL002102 PE=4<br>SV=1                                 |
| CCG008297.1 | 3042  | 96   | 701 | 1.35604685 | 8.055802767 | 2.570621337  | Up   | 0        | 0        | Rhopper OS=Culex quinquefasciatus<br>GN=CpipJ_CPIJ004355 PE=4<br>SV=1                     |
| CCG008972.1 | 2412  | 189  | 702 | 3.36703144 | 10.17442384 | 1.595398     | Up   | 2.34E-13 | 6.64E-13 | DNA topoisomerase OS=Aedes aegypti GN=AAEL011603 PE=3<br>SV=1                             |
| CCG016992.2 | 12986 | 2545 | 702 | 8.4212209  | 1.889782096 | -2.155809517 | Down | 0        | 0        | AAEL010187-PA (Fragment)<br>OS=Aedes aegypti<br>GN=AAEL010187 PE=4 SV=1                   |
| CCG002130.1 | 1401  | 88   | 703 | 2.69902687 | 17.54151932 | 2.700262464  | Up   | 2.93E-14 | 1.02E-13 | AAEL013540-PA OS=Aedes aegypti GN=AAEL013540 PE=4<br>SV=1                                 |
| CCG012542.2 | 1710  | 93   | 703 | 2.33695048 | 14.37173601 | 2.620535272  | Up   | 4.04E-14 | 1.39E-13 | AAEL005571-PA OS=Aedes aegypti GN=AAEL005571 PE=4<br>SV=1                                 |
| CCG018045.1 | 627   | 112  | 703 | 7.67561448 | 39.19564365 | 2.352339161  | Up   | 0        | 0        | Subolesin-like protein OS=Aedes albopictus PE=2 SV=1                                      |
| CCG026667.1 | 2225  | 135  | 703 | 2.60715244 | 11.0452443  | 2.082878486  | Up   | 1.90E-13 | 5.48E-13 | AAEL002063-PA OS=Aedes aegypti GN=AAEL002063 PE=4<br>SV=1                                 |
| CCG004838.1 | 1299  | 142  | 703 | 4.69723042 | 18.91891345 | 2.009946963  | Up   | 2.62E-13 | 7.34E-13 | AAEL010107-PA OS=Aedes aegypti GN=AAEL010107 PE=4<br>SV=1                                 |
| CCG019575.1 | 2034  | 168  | 703 | 3.54912262 | 12.08243293 | 1.76737666   | Up   | 1.45E-13 | 4.33E-13 | AAEL001765-PA OS=Aedes aegypti GN=AAEL001765 PE=4<br>SV=1                                 |
| CCG013402.1 | 1719  | 260  | 703 | 6.49920361 | 14.29649132 | 1.13732627   | Up   | 3.22E-13 | 8.81E-13 | AGAP010551-PA (Fragment)<br>OS=Anopheles gambiae<br>GN=AGAP010551 PE=4 SV=4               |
| CCG011613.2 | 1514  | 273  | 703 | 7.7481754  | 16.23227779 | 1.066936942  | Up   | 1.53E-14 | 5.41E-14 | AAEL012586-PA OS=Aedes aegypti GN=AAEL012586 PE=4<br>SV=1                                 |

|             |      |      |     |            |             |              |      |           |           |                                                                                 |
|-------------|------|------|-----|------------|-------------|--------------|------|-----------|-----------|---------------------------------------------------------------------------------|
| CCG017294.1 | 941  | 1287 | 703 | 58.7694457 | 26.11654471 | -1.170102255 | Down | 1.38E-70  | 6.85E-70  | AAEL012023-PA OS=Aedes aegypti GN=AAEL012023 PE=4 SV=1                          |
| CCG006299.1 | 2508 | 47   | 704 | 0.8052542  | 9.81284962  | 3.607155971  | Up   | 0         | 0         | AAEL005281-PA OS=Aedes aegypti GN=AAEL005281 PE=4 SV=1                          |
| CCG005103.1 | 639  | 127  | 704 | 8.5401507  | 38.51428302 | 2.173060136  | Up   | 1.57E-13  | 4.66E-13  | AAEL006908-PA OS=Aedes aegypti GN=AAEL006908 PE=4 SV=1                          |
| CCG014291.1 | 1440 | 173  | 704 | 5.16233617 | 17.09071309 | 1.727116595  | Up   | 3.60E-13  | 9.69E-13  | AAEL012016-PA OS=Aedes aegypti GN=AAEL012016 PE=4 SV=1                          |
| CCG020803.1 | 1011 | 200  | 704 | 8.50044206 | 24.34285544 | 1.517888633  | Up   | 0         | 0         | AAEL001158-PB OS=Aedes aegypti GN=AAEL001158 PE=3 SV=1                          |
| CCG027344.1 | 521  | 2324 | 704 | 191.673058 | 47.23728762 | -2.020649531 | Down | 2.82E-280 | 1.76E-279 | -                                                                               |
| CCG004234.1 | 936  | 27   | 705 | 1.23951158 | 26.33075334 | 4.408905149  | Up   | 2.28E-12  | 5.41E-12  | AAEL008124-PA OS=Aedes aegypti GN=AAEL008124 PE=4 SV=1                          |
| CCG022301.1 | 1291 | 33   | 705 | 1.09837432 | 19.09030606 | 4.119398532  | Up   | 1.31E-13  | 4.00E-13  | AAEL011762-PA OS=Aedes aegypti GN=AAEL011762 PE=4 SV=1                          |
| CCG017013.1 | 1305 | 52   | 705 | 1.71220398 | 18.88550584 | 3.463352933  | Up   | 0         | 0         | Polyadenylate-binding protein-like protein OS=Aedes aegypti PE=2 SV=1           |
| CCG000243.1 | 894  | 168  | 705 | 8.07484946 | 27.5677686  | 1.771475228  | Up   | 1.45E-13  | 4.33E-13  | AAEL007179-PA OS=Aedes aegypti GN=AAEL007179 PE=4 SV=1                          |
| CCG006321.1 | 1752 | 176  | 705 | 4.31659434 | 14.0671148  | 1.704361032  | Up   | 0         | 0         | AAEL000426-PA OS=Aedes aegypti GN=AAEL000426 PE=4 SV=1                          |
| CCG017560.1 | 651  | 1342 | 705 | 88.5796987 | 37.85804167 | -1.226376305 | Down | 4.11E-79  | 2.08E-78  | AAEL007410-PA OS=Aedes aegypti GN=AAEL007410 PE=4 SV=1                          |
| CCG000228.1 | 543  | 1485 | 705 | 117.513915 | 45.38781791 | -1.372454565 | Down | 8.35E-104 | 4.45E-103 | AAEL006652-PA OS=Aedes aegypti GN=AAEL006652 PE=4 SV=1                          |
| CCG004142.1 | 1323 | 122  | 706 | 3.96243962 | 18.65498367 | 2.23510024   | Up   | 8.04E-14  | 2.58E-13  | AAEL007560-PA OS=Aedes aegypti GN=AAEL007560 PE=4 SV=1                          |
| CCG015988.1 | 1572 | 160  | 706 | 4.37350988 | 15.70009122 | 1.843909482  | Up   | 4.24E-14  | 1.44E-13  | Zinc finger protein 189 OS=Culex quinquefasciatus GN=CpipJ_CPIJ000772 PE=4 SV=1 |
| CCG028447.1 | 1278 | 93   | 707 | 3.12690557 | 19.33920319 | 2.628720798  | Up   | 4.04E-14  | 1.38E-13  | AAEL014536-PA OS=Aedes aegypti GN=AAEL014536 PE=4 SV=1                          |
| CCG022160.1 | 2333 | 113  | 707 | 2.08126018 | 10.59387127 | 2.347700646  | Up   | 1.42E-13  | 4.26E-13  | AAEL013552-PA OS=Aedes aegypti GN=AAEL013552 PE=4 SV=1                          |

|             |      |      |     |            |             |             |      |          |          |                                                                                          |
|-------------|------|------|-----|------------|-------------|-------------|------|----------|----------|------------------------------------------------------------------------------------------|
| CCG005637.1 | 1410 | 3091 | 707 | 94.1981913 | 17.52872459 | -2.42597833 | Down | 0        | 0        | AAEL010075-PA OS=Aedes aegypti GN=AAEL010075 PE=3 SV=1                                   |
| CCG028283.1 | 591  | 34   | 708 | 2.47203211 | 41.87895085 | 4.082455913 | Up   | 8.82E-14 | 2.80E-13 | AAEL010109-PA OS=Aedes aegypti GN=AAEL010109 PE=4 SV=1                                   |
| CCG014839.1 | 1052 | 85   | 708 | 3.4718892  | 23.52705319 | 2.760527818 | Up   | 0        | 0        | AAEL011700-PA OS=Aedes aegypti GN=AAEL011700 PE=4 SV=1                                   |
| CCG022754.1 | 9760 | 2838 | 708 | 12.4946831 | 2.535907782 | -2.30074012 | Down | 0        | 0        | AAEL008478-PA OS=Aedes aegypti GN=AAEL008478 PE=4 SV=1                                   |
| CCG000917.1 | 936  | 33   | 709 | 1.51495859 | 26.48014768 | 4.127560902 | Up   | 1.31E-13 | 4.01E-13 | AAEL015338-PA OS=Aedes aegypti GN=AAEL015338 PE=4 SV=1                                   |
| CCG028467.1 | 1059 | 60   | 709 | 2.43454587 | 23.40454979 | 3.265064425 | Up   | 0        | 0        | AAEL010747-PA OS=Aedes aegypti GN=AAEL010747 PE=4 SV=1                                   |
| CCG006687.1 | 1395 | 69   | 709 | 2.12538472 | 17.7673249  | 3.063430564 | Up   | 0        | 0        | Putative uncharacterized protein OS=Culex quinquefasciatus GN=CpipJ_CPIJ016357 PE=4 SV=1 |
| CCG022437.1 | 1886 | 95   | 709 | 2.1644352  | 13.14179122 | 2.602099413 | Up   | 0        | 0        | Zinc finger protein OS=Culex quinquefasciatus GN=CpipJ_CPIJ010644 PE=4 SV=1              |
| CCG001106.1 | 1587 | 85   | 710 | 2.30146657 | 15.63980876 | 2.764597482 | Up   | 0        | 0        | AAEL007368-PA OS=Aedes aegypti GN=AAEL007368 PE=4 SV=1                                   |
| CCG001102.1 | 1084 | 116  | 710 | 4.59823728 | 22.8970263  | 2.316007423 | Up   | 1.16E-13 | 3.59E-13 | AAEL006144-PA OS=Aedes aegypti GN=AAEL006144 PE=2 SV=1                                   |
| CCG013345.1 | 930  | 229  | 710 | 10.5807196 | 26.68857689 | 1.33478463  | Up   | 2.46E-13 | 6.93E-13 | AAEL004797-PA OS=Aedes aegypti GN=AAEL004797 PE=4 SV=1                                   |
| CCG025310.4 | 1686 | 40   | 711 | 1.01944803 | 14.74219145 | 3.854090859 | Up   | 6.86E-14 | 2.24E-13 | AAEL006681-PA OS=Aedes aegypti GN=AAEL006681 PE=4 SV=1                                   |
| CCG005638.1 | 1487 | 203  | 711 | 5.86607675 | 16.71508728 | 1.510683036 | Up   | 9.28E-14 | 2.93E-13 | AAEL009079-PA OS=Aedes aegypti GN=AAEL009079 PE=4 SV=1                                   |
| CCG009091.1 | 1011 | 12   | 712 | 0.51002652 | 24.6194788  | 5.593084134 | Up   | 1.30E-07 | 2.49E-07 | AAEL004593-PA OS=Aedes aegypti GN=AAEL004593 PE=4 SV=1                                   |
| CCG000493.1 | 1777 | 63   | 712 | 1.52340646 | 14.00691787 | 3.200766711 | Up   | 0        | 0        | AAEL001580-PA OS=Aedes aegypti GN=AAEL001580 PE=4 SV=1                                   |
| CCG002336.1 | 2292 | 95   | 712 | 1.78103176 | 10.85963921 | 2.608191026 | Up   | 0        | 0        | Zinc finger protein 558 OS=Culex quinquefasciatus GN=CpipJ_CPIJ018144 PE=4 SV=1          |

|             |      |      |     |            |             |              |      |          |          |                                                                                             |
|-------------|------|------|-----|------------|-------------|--------------|------|----------|----------|---------------------------------------------------------------------------------------------|
| CCG000653.1 | 604  | 122  | 712 | 8.67931726 | 41.20909447 | 2.247309297  | Up   | 8.04E-14 | 2.58E-13 | AAEL004343-PA OS=Aedes aegypti GN=AAEL004345 PE=3 SV=1                                      |
| CCG012619.1 | 1086 | 3006 | 712 | 118.938326 | 22.91923855 | -2.375582659 | Down | 0        | 0        | AAEL007542-PA OS=Aedes aegypti GN=AAEL007542 PE=3 SV=1                                      |
| CCG003163.1 | 1158 | 31   | 713 | 1.15031241 | 21.52439667 | 4.22587516   | Up   | 2.40E-13 | 6.78E-13 | AAEL004316-PB OS=Aedes aegypti GN=AAEL004318 PE=4 SV=1                                      |
| CCG009248.1 | 793  | 151  | 713 | 8.18213105 | 31.43159059 | 1.941666731  | Up   | 0        | 0        | GK19160 OS=Drosophila willistoni GN=GK19160 PE=4 SV=1                                       |
| CCG012081.1 | 3346 | 260  | 713 | 3.33895128 | 7.449268183 | 1.157703657  | Up   | 3.22E-13 | 8.82E-13 | AAEL012449-PA OS=Aedes aegypti GN=AAEL012449 PE=4 SV=1                                      |
| CCG003498.1 | 2022 | 74   | 714 | 1.57258178 | 12.34431732 | 2.972640102  | Up   | 0        | 0        | AAEL007642-PA OS=Aedes aegypti GN=TUBE PE=4 SV=1                                            |
| CCG013120.1 | 943  | 128  | 714 | 5.83258328 | 26.46893915 | 2.182093468  | Up   | 4.15E-14 | 1.42E-13 | AAEL012624-PA OS=Aedes aegypti GN=AAEL012624 PE=4 SV=1                                      |
| CCG001114.1 | 1002 | 168  | 714 | 7.2045064  | 24.91038884 | 1.789776045  | Up   | 1.45E-13 | 4.33E-13 | AAEL000883-PA OS=Aedes aegypti GN=AAEL000883 PE=4 SV=1                                      |
| CCG012595.1 | 2609 | 226  | 714 | 3.72217709 | 9.566964207 | 1.361914505  | Up   | 2.04E-14 | 7.16E-14 | Uncharacterized protein OS=Anopheles darlingi GN=AND_10270 PE=4 SV=1                        |
| CCG020007.1 | 1630 | 256  | 714 | 6.7486209  | 15.31301203 | 1.182093468  | Up   | 0        | 0        | AAEL014283-PA OS=Aedes aegypti GN=AAEL014283 PE=4 SV=1                                      |
| CCG023188.1 | 743  | 8    | 715 | 0.46266201 | 33.64087199 | 6.184112635  | Up   | 2.19E-06 | 3.96E-06 | Putative uncharacterized protein OS=Culex quinquefasciatus GN=CpipJ_CPIJ013878 PE=4 SV=1    |
| CCG016251.1 | 858  | 115  | 715 | 5.75934671 | 29.13189731 | 2.338622585  | Up   | 6.13E-14 | 2.03E-13 | Putative uncharacterized protein OS=Amblyomma maculatum PE=2 SV=1                           |
| CCG008040.1 | 3658 | 170  | 715 | 1.99695322 | 6.833014733 | 1.774721699  | Up   | 3.53E-13 | 9.53E-13 | AAEL001370-PA OS=Aedes aegypti GN=AAEL001370 PE=3 SV=1                                      |
| CCG017222.1 | 1976 | 204  | 715 | 4.43614669 | 12.64937646 | 1.511687294  | Up   | 6.59E-14 | 2.17E-13 | AAEL009374-PA OS=Aedes aegypti GN=AAEL009374 PE=4 SV=1                                      |
| CCG019905.1 | 1782 | 86   | 716 | 2.07373579 | 14.04608651 | 2.759864226  | Up   | 0        | 0        | Small nuclear ribonucleoprotein-associated protein OS=Aedes aegypti GN=AAEL002377 PE=2 SV=1 |

|             |      |      |     |            |             |              |      |          |          |                                                                       |
|-------------|------|------|-----|------------|-------------|--------------|------|----------|----------|-----------------------------------------------------------------------|
| CCG012793.1 | 1515 | 125  | 716 | 3.54535764 | 16.52153543 | 2.220344696  | Up   | 2.35E-14 | 8.23E-14 | AAEL011862-PA OS=Aedes aegypti GN=AAEL011862 PE=4 SV=1                |
| CCG012302.1 | 2648 | 82   | 717 | 1.33063378 | 9.465666331 | 2.830590508  | Up   | 0        | 0        | AAEL008463-PA OS=Aedes aegypti GN=AAEL008463 PE=3 SV=1                |
| CCG020325.1 | 1191 | 230  | 717 | 8.29810156 | 21.04541095 | 1.342652462  | Up   | 3.85E-13 | 1.03E-12 | AAEL012209-PA OS=Aedes aegypti GN=AAEL012209 PE=4 SV=1                |
| CCG003277.1 | 1360 | 179  | 718 | 5.65557536 | 18.45591377 | 1.70633746   | Up   | 0        | 0        | AAEL007895-PA OS=Aedes aegypti GN=AAEL007895 PE=4 SV=1                |
| CCG002929.1 | 2268 | 181  | 718 | 3.42924249 | 11.06703824 | 1.690307351  | Up   | 1.53E-13 | 4.55E-13 | AAEL000315-PA OS=Aedes aegypti GN=AAEL000315 PE=4 SV=1                |
| CCG022396.1 | 1281 | 214  | 718 | 7.17839438 | 19.59410049 | 1.448686251  | Up   | 0        | 0        | AAEL008005-PA OS=Aedes aegypti GN=AAEL008005 PE=4 SV=1                |
| CCG023977.1 | 1506 | 68   | 719 | 1.9402005  | 16.6899077  | 3.104698323  | Up   | 0        | 0        | AAEL000260-PA OS=Aedes aegypti GN=AAEL000260 PE=4 SV=1                |
| CCG025401.1 | 2721 | 143  | 719 | 2.25824037 | 9.237413083 | 2.032289827  | Up   | 0        | 0        | AAEL005837-PA OS=Aedes aegypti GN=AAEL005837 PE=4 SV=1                |
| CCG015645.1 | 2733 | 180  | 719 | 2.83005936 | 9.19685364  | 1.700308068  | Up   | 3.32E-13 | 9.05E-13 | AAEL009261-PA OS=Aedes aegypti GN=AAEL009261 PE=4 SV=1                |
| CCG006750.1 | 2514 | 232  | 719 | 3.96538521 | 9.998011535 | 1.334180169  | Up   | 2.91E-13 | 8.05E-13 | AGAP008245-PA (Fragment) OS=Anopheles gambiae GN=AGAP008245 PE=4 SV=3 |
| CCG002163.1 | 1644 | 1391 | 719 | 36.3569956 | 15.28893005 | -1.24974554  | Down | 2.30E-84 | 1.18E-83 | AAEL005666-PA OS=Aedes aegypti GN=AAEL005666 PE=4 SV=1                |
| CCG014702.1 | 2328 | 5146 | 719 | 94.9837862 | 10.79682174 | -3.137074577 | Down | 0        | 0        | AAEL002971-PA OS=Aedes aegypti GN=AAEL002971 PE=4 SV=1                |
| CCG020005.1 | 612  | 20   | 720 | 1.40423969 | 41.12738444 | 4.872238205  | Up   | 3.69E-10 | 7.72E-10 | AAEL014287-PA OS=Aedes aegypti GN=AAEL014287 PE=3 SV=1                |
| CCG023857.1 | 2673 | 93   | 720 | 1.49501882 | 9.416370848 | 2.655007489  | Up   | 4.04E-14 | 1.39E-13 | AAEL008550-PA OS=Aedes aegypti GN=AAEL008550 PE=4 SV=1                |
| CCG023181.1 | 1128 | 189  | 720 | 7.19971617 | 22.31379368 | 1.631923876  | Up   | 2.34E-13 | 6.64E-13 | Rab-protein OS=Aedes aegypti PE=2 SV=1                                |
| CCG007047.1 | 636  | 190  | 720 | 12.8368704 | 39.57540767 | 1.624310692  | Up   | 2.69E-13 | 7.52E-13 | AAEL001615-PA OS=Aedes aegypti GN=AAEL001615 PE=4 SV=1                |
| CCG025702.1 | 2403 | 275  | 720 | 4.91746859 | 10.47439004 | 1.090878492  | Up   | 4.31E-13 | 1.14E-12 | AAEL012969-PA OS=Aedes aegypti GN=AAEL012969 PE=4 SV=1                |

|             |      |      |     |            |             |              |      |           |           |                                                                                          |
|-------------|------|------|-----|------------|-------------|--------------|------|-----------|-----------|------------------------------------------------------------------------------------------|
| CCG015517.1 | 2561 | 263  | 721 | 4.4127451  | 9.841826456 | 1.157249664  | Up   | 1.40E-14  | 4.97E-14  | AAEL005402-PA OS=Aedes aegypti GN=AAEL005402 PE=4 SV=1                                   |
| CCG008026.1 | 851  | 14   | 722 | 0.70690515 | 29.65907853 | 5.390813309  | Up   | 3.07E-08  | 6.01E-08  | AAEL005000-PA OS=Aedes aegypti GN=AAEL005000 PE=4 SV=1                                   |
| CCG001644.1 | 1560 | 21   | 722 | 0.57843874 | 16.17940758 | 4.805850808  | Up   | 1.76E-10  | 3.72E-10  | AAEL000739-PA OS=Aedes aegypti GN=AAEL000739 PE=4 SV=1                                   |
| CCG026526.1 | 1131 | 52   | 722 | 1.97561998 | 22.31642425 | 3.497728513  | Up   | 0         | 0         | AAEL011659-PA OS=Aedes aegypti GN=AAEL011659 PE=4 SV=1                                   |
| CCG017580.1 | 582  | 72   | 722 | 5.31584346 | 43.36748424 | 3.028243229  | Up   | 0         | 0         | AAEL002103-PA OS=Aedes aegypti GN=AAEL002103 PE=4 SV=1                                   |
| CCG007398.1 | 1599 | 123  | 722 | 3.3053642  | 15.78478789 | 2.255653725  | Up   | 0         | 0         | AAEL004057-PA OS=Aedes aegypti GN=AAEL004057 PE=4 SV=1                                   |
| CCG028378.1 | 1078 | 218  | 722 | 8.68961238 | 23.41361394 | 1.429983906  | Up   | 0         | 0         | -                                                                                        |
| CCG004481.1 | 816  | 102  | 723 | 5.37121683 | 30.9740614  | 2.527739699  | Up   | 0         | 0         | AAEL002103-PA OS=Aedes aegypti GN=AAEL002103 PE=4 SV=1                                   |
| CCG020809.1 | 975  | 190  | 723 | 8.37358931 | 25.92290678 | 1.630309432  | Up   | 2.69E-13  | 7.52E-13  | AAEL001154-PA OS=Aedes aegypti GN=AAEL001154 PE=4 SV=1                                   |
| CCG018820.3 | 1410 | 1184 | 723 | 36.0823871 | 17.92541426 | -1.009288325 | Down | 1.72E-51  | 8.05E-51  | Tubulin beta-1 chain OS=Culex quinquefasciatus GN=CpipJ_CPIJ003635 PE=3 SV=1             |
| CCG015242.2 | 6256 | 2373 | 723 | 16.2991017 | 4.040094966 | -2.012331344 | Down | 1.38E-284 | 8.62E-284 | Putative uncharacterized protein OS=Culex quinquefasciatus GN=CpipJ_CPIJ007959 PE=4 SV=1 |
| CCG018480.1 | 785  | 171  | 724 | 9.36028614 | 32.24177374 | 1.784306576  | Up   | 3.42E-13  | 9.25E-13  | Ribulose-phosphate 3-epimerase OS=Aedes aegypti PE=2 SV=1                                |
| CCG016608.2 | 2070 | 276  | 724 | 5.72929795 | 12.22695284 | 1.093634634  | Up   | 0         | 0         | Ceramide kinase OS=Culex quinquefasciatus GN=CpipJ_CPIJ003342 PE=4 SV=1                  |
| CCG023297.1 | 1968 | 1850 | 724 | 40.3932973 | 12.86066686 | -1.651150465 | Down | 2.82E-169 | 1.64E-168 | Discs overgrown protein kinase OS=Culex quinquefasciatus GN=CpipJ_CPIJ006381 PE=4 SV=1   |
| CCG019434.1 | 974  | 21   | 725 | 0.92645218 | 26.02130458 | 4.811832966  | Up   | 1.76E-10  | 3.73E-10  | Putative uncharacterized protein OS=Culex quinquefasciatus GN=CpipJ_CPIJ005419 PE=4 SV=1 |



|             |      |      |     |            |             |              |      |           |           |                                                                      |
|-------------|------|------|-----|------------|-------------|--------------|------|-----------|-----------|----------------------------------------------------------------------|
| CCG011141.1 | 1218 | 126  | 725 | 4.44514496 | 20.80849808 | 2.226870465  | Up   | 1.34E-13  | 4.06E-13  | AAEL000956-PA OS=Reedes aegypti GN=AAEL000956 PE=4 SV=1              |
| CCG028131.1 | 984  | 181  | 725 | 7.90398574 | 25.75686043 | 1.704304502  | Up   | 1.53E-13  | 4.55E-13  | AAEL007370-PA OS=Reedes aegypti GN=AAEL007370 PE=3 SV=1              |
| CCG025352.1 | 2664 | 128  | 726 | 2.06461187 | 9.526917769 | 2.206138942  | Up   | 4.15E-14  | 1.42E-13  | AAEL011811-PA OS=Reedes aegypti GN=AAEL011811 PE=3 SV=1              |
| CCG027257.1 | 942  | 177  | 726 | 8.07393103 | 26.94236617 | 1.738533392  | Up   | 0         | 0         | AAEL001709-PA OS=Reedes aegypti GN=AAEL001709 PE=4 SV=1              |
| CCG008489.1 | 714  | 255  | 726 | 15.3463338 | 35.54581084 | 1.211785505  | Up   | 0         | 0         | AAEL004445-PA OS=Reedes aegypti GN=AAEL004445 PE=4 SV=1              |
| CCG023634.1 | 1761 | 119  | 727 | 2.90369019 | 14.43195185 | 2.313306994  | Up   | 0         | 0         | AAEL007943-PA OS=Reedes aegypti GN=AAEL007943 PE=4 SV=1              |
| CCG009827.1 | 1530 | 135  | 727 | 3.79144717 | 16.6108936  | 2.131309161  | Up   | 1.90E-13  | 5.49E-13  | AAEL014400-PA OS=Reedes aegypti GN=AAEL014400 PE=4 SV=1              |
| CCG009174.1 | 1194 | 1779 | 727 | 64.0227453 | 21.28531592 | -1.588726038 | Down | 4.68E-154 | 2.67E-153 | AAEL005319-PA OS=Reedes aegypti GN=AAEL005319 PE=4 SV=1              |
| CCG025294.1 | 2025 | 21   | 728 | 0.44561206 | 12.56771629 | 4.817790421  | Up   | 1.76E-10  | 3.72E-10  | AAEL006549-PA OS=Reedes aegypti GN=AAEL006549 PE=4 SV=1              |
| CCG003972.1 | 1509 | 72   | 728 | 2.05024579 | 16.86522564 | 3.040182843  | Up   | 0         | 0         | AAEL010447-PA OS=Reedes aegypti GN=AAEL010447 PE=4 SV=1              |
| CCG021179.1 | 1257 | 128  | 728 | 4.37559748 | 20.24632099 | 2.210107844  | Up   | 4.15E-14  | 1.42E-13  | Uncharacterized protein OS=Anopheles darlingi GN=AND_22964 PE=4 SV=1 |
| CCG012566.1 | 1077 | 204  | 729 | 8.13911408 | 23.66256617 | 1.539662866  | Up   | 6.59E-14  | 2.17E-13  | -                                                                    |
| CCG019486.1 | 2100 | 253  | 729 | 5.17682993 | 12.13551608 | 1.229094633  | Up   | 3.13E-13  | 8.61E-13  | AAEL006075-PA OS=Reedes aegypti GN=AAEL006075 PE=4 SV=1              |
| CCG000895.1 | 846  | 270  | 729 | 13.7137451 | 30.12362147 | 1.135272611  | Up   | 2.59E-13  | 7.26E-13  | AAEL015284-PA OS=Reedes aegypti GN=AAEL015284 PE=4 SV=1              |
| CCG001467.1 | 3579 | 26   | 730 | 0.31215789 | 7.130355419 | 4.513626139  | Up   | 4.60E-12  | 1.05E-11  | AAEL012489-PA OS=Reedes aegypti GN=AAEL012489 PE=4 SV=1              |
| CCG018475.1 | 996  | 43   | 730 | 1.85511906 | 25.62203016 | 3.787801103  | Up   | 8.46E-14  | 2.70E-13  | AAEL007167-PA OS=Reedes aegypti GN=AAEL007167 PE=4 SV=1              |
| CCG017812.1 | 2524 | 145  | 730 | 2.46854656 | 10.11075358 | 2.034156768  | Up   | 0         | 0         | AAEL012202-PA OS=Reedes aegypti GN=AAEL012202 PE=4 SV=1              |

|             |      |     |     |            |             |             |    |          |          |                                                                                          |
|-------------|------|-----|-----|------------|-------------|-------------|----|----------|----------|------------------------------------------------------------------------------------------|
| CCG021001.1 | 1269 | 6   | 731 | 0.20316659 | 20.1375101  | 6.631078299 | Up | 8.38E-06 | 1.47E-05 | AAEL013830-PA OS=Aedes aegypti GN=AAEL013830 PE=4 SV=1                                   |
| CCG005262.1 | 3045 | 110 | 731 | 1.55227284 | 8.392282535 | 2.434681086 | Up | 0        | 0        | AAEL004441-PA OS=Aedes aegypti GN=AAEL004441 PE=4 SV=1                                   |
| CCG020063.1 | 2037 | 216 | 731 | 4.55643725 | 12.54516461 | 1.461153298 | Up | 1.38E-13 | 4.17E-13 | AAEL014149-PA OS=Aedes aegypti GN=AAEL014149 PE=4 SV=1                                   |
| CCG001812.1 | 552  | 263 | 731 | 20.4728989 | 46.29438464 | 1.17712181  | Up | 1.40E-14 | 4.97E-14 | AAEL005816-PA OS=Aedes aegypti GN=AAEL005816 PE=4 SV=1                                   |
| CCG017723.1 | 621  | 36  | 732 | 2.49099911 | 41.20685764 | 4.048088041 | Up | 6.13E-14 | 2.03E-13 | Putative uncharacterized protein OS=Culex quinquefasciatus GN=CpipJ_CPIJ014666 PE=4 SV=1 |
| CCG025635.1 | 2055 | 99  | 732 | 2.07007481 | 12.45229129 | 2.588656422 | Up | 0        | 0        | AAEL010663-PA OS=Aedes aegypti GN=AAEL010663 PE=4 SV=1                                   |
| CCG001050.1 | 1468 | 101 | 732 | 2.95636457 | 17.43151131 | 2.559801559 | Up | 0        | 0        | AAEL002772-PA OS=Aedes aegypti GN=AAEL002772 PE=4 SV=1                                   |
| CCG021181.2 | 1751 | 101 | 732 | 2.47855123 | 14.6141968  | 2.559801559 | Up | 0        | 0        | AAEL002366-PA OS=Aedes aegypti GN=AAEL002366 PE=4 SV=1                                   |
| CCG024570.2 | 2115 | 214 | 732 | 4.34776511 | 12.0990348  | 1.476546056 | Up | 0        | 0        | AAEL002782-PA (Fragment) OS=Aedes aegypti GN=AAEL002782 PE=4 SV=1                        |
| CCG007597.1 | 2264 | 85  | 733 | 1.613263   | 11.31820533 | 2.810591656 | Up | 0        | 0        | AAEL010650-PA OS=Aedes aegypti GN=AAEL010650 PE=3 SV=1                                   |
| CCG013999.1 | 1551 | 152 | 733 | 4.2110894  | 16.521223   | 1.972055079 | Up | 8.39E-14 | 2.69E-13 | AAEL003770-PA OS=Aedes aegypti GN=AAEL003770 PE=3 SV=1                                   |
| CCG008897.1 | 982  | 171 | 733 | 7.48250979 | 26.09411087 | 1.802130077 | Up | 3.42E-13 | 9.27E-13 | AAEL000844-PA OS=Aedes aegypti GN=AAEL000844 PE=4 SV=1                                   |
| CCG025278.1 | 1122 | 197 | 733 | 7.5445969  | 22.83816121 | 1.597930772 | Up | 0        | 0        | Structural maintenance of chromosomes protein OS=Aedes aegypti GN=AAEL001655 PE=3 SV=1   |
| CCG002476.1 | 1140 | 248 | 733 | 9.34780192 | 22.47755866 | 1.265786282 | Up | 5.86E-14 | 1.95E-13 | AAEL009767-PA OS=Aedes aegypti GN=AAEL009767 PE=4 SV=1                                   |
| CCG024055.1 | 2910 | 44  | 734 | 0.6497142  | 8.817654691 | 3.762517838 | Up | 3.91E-14 | 1.34E-13 | AAEL013016-PA OS=Aedes aegypti GN=AAEL013016 PE=4 SV=1                                   |

|             |      |      |     |            |             |              |      |           |           |                                                                   |
|-------------|------|------|-----|------------|-------------|--------------|------|-----------|-----------|-------------------------------------------------------------------|
| CCG025705.1 | 2286 | 128  | 734 | 2.40600439 | 11.22457356 | 2.221949457  | Up   | 4.15E-14  | 1.42E-13  | AAEL013594-PA OS=Aedes aegypti GN=AAEL013594 PE=4 SV=1            |
| CCG012623.1 | 1460 | 145  | 734 | 4.26754214 | 17.57491449 | 2.042040367  | Up   | 0         | 0         | AAEL007541-PA OS=Aedes aegypti GN=AAEL007541 PE=4 SV=1            |
| CCG017559.1 | 2967 | 155  | 734 | 2.24479571 | 8.648255865 | 1.945825051  | Up   | 3.42E-13  | 9.26E-13  | AAEL007409-PA (Fragment) OS=Aedes aegypti GN=AAEL007409 PE=4 SV=1 |
| CCG016365.1 | 3429 | 1577 | 734 | 19.7618173 | 7.483049038 | -1.401017488 | Down | 1.35E-113 | 7.32E-113 | AAEL004694-PA OS=Aedes aegypti GN=AAEL004694 PE=4 SV=1            |
| CCG000524.1 | 2481 | 40   | 735 | 0.69278089 | 10.35644233 | 3.901985549  | Up   | 6.86E-14  | 2.24E-13  | AAEL010280-PA OS=Aedes aegypti GN=AAEL010280 PE=4 SV=1            |
| CCG025761.1 | 2796 | 84   | 735 | 1.29093623 | 9.189675761 | 2.831596221  | Up   | 0         | 0         | AAEL010497-PA OS=Aedes aegypti GN=AAEL010497 PE=4 SV=1            |
| CCG000357.1 | 561  | 115  | 735 | 8.80841262 | 45.80095085 | 2.378423593  | Up   | 6.13E-14  | 2.03E-13  | AGAP003741-PA OS=Anopheles gambiae GN=AgaP_AGAP003741 PE=4 SV=3   |
| CCG027541.1 | 1113 | 119  | 735 | 4.59424835 | 23.08565447 | 2.32909588   | Up   | 0         | 0         | AAEL012913-PA OS=Aedes aegypti GN=AAEL012913 PE=4 SV=1            |
| CCG028619.1 | 1011 | 217  | 735 | 9.22297963 | 25.41477095 | 1.462362411  | Up   | 1.47E-13  | 4.37E-13  | AAEL014237-PA OS=Aedes aegypti GN=AAEL014237 PE=4 SV=1            |
| CCG019691.1 | 1645 | 236  | 735 | 6.16465494 | 15.61965558 | 1.341270594  | Up   | 4.60E-13  | 1.20E-12  | AAEL005557-PA OS=Aedes aegypti GN=AAEL005557 PE=4 SV=1            |
| CCG022072.1 | 1785 | 256  | 735 | 6.1626062  | 14.39458455 | 1.223913644  | Up   | 0         | 0         | AAEL004916-PA OS=Aedes aegypti GN=AAEL004916 PE=4 SV=1            |
| CCG023420.1 | 5223 | 3609 | 735 | 29.6913215 | 4.919458822 | -2.593469784 | Down | 0         | 0         | AAEL002972-PA OS=Aedes aegypti GN=AAEL002972 PE=3 SV=1            |
| CCG004886.1 | 759  | 97   | 736 | 5.49152076 | 33.89893505 | 2.625962318  | Up   | 3.62E-14  | 1.25E-13  | AAEL015658-PA OS=Aedes aegypti GN=AAEL015658 PE=4 SV=1            |
| CCG021369.1 | 717  | 134  | 736 | 8.03060591 | 35.88464673 | 2.159785969  | Up   | 0         | 0         | AAEL004437-PA OS=Aedes aegypti GN=AAEL004437 PE=4 SV=1            |
| CCG004942.1 | 2221 | 201  | 736 | 3.88875131 | 11.58455277 | 1.574823469  | Up   | 0         | 0         | AAEL010761-PA OS=Aedes aegypti GN=AAEL010761 PE=4 SV=1            |

|             |       |      |     |            |             |             |      |           |           |                                                                                                |
|-------------|-------|------|-----|------------|-------------|-------------|------|-----------|-----------|------------------------------------------------------------------------------------------------|
| CCG021223.1 | 31651 | 1697 | 736 | 2.30386527 | 0.812906123 | -1.50289569 | Down | 1.43E-135 | 8.01E-135 | AGAP012613-PA OS=Anopheles gambiae str. PEST<br>GN=AgaP_AGAP012613 PE=4 SV=1                   |
| CCG001846.1 | 951   | 125  | 737 | 5.64796722 | 27.09174551 | 2.262049728 | Up   | 2.35E-14  | 8.22E-14  | AAEL007258-PA OS=Aedes aegypti GN=AAEL007258 PE=4 SV=1                                         |
| CCG007363.1 | 1399  | 200  | 737 | 6.14292132 | 18.41619012 | 1.583977823 | Up   | 0         | 0         | AAEL007980-PA OS=Aedes aegypti GN=AAEL007980 PE=4 SV=1                                         |
| CCG007718.1 | 1227  | 175  | 738 | 6.12852776 | 21.0262496  | 1.778579098 | Up   | 3.55E-13  | 9.58E-13  | AAEL002532-PA OS=Aedes aegypti GN=AAEL002532 PE=4 SV=1                                         |
| CCG007631.1 | 894   | 186  | 738 | 8.9400119  | 28.85817479 | 1.690631399 | Up   | 6.43E-13  | 1.64E-12  | AAEL007492-PA OS=Aedes aegypti GN=AAEL007492 PE=4 SV=1                                         |
| CCG018215.1 | 1559  | 281  | 738 | 7.74502593 | 16.54856206 | 1.09536389  | Up   | 0         | 0         | AAEL001190-PA OS=Aedes aegypti GN=AAEL001190 PE=4 SV=1                                         |
| CCG013917.1 | 2205  | 32   | 739 | 0.62359706 | 11.7161753  | 4.231743758 | Up   | 1.77E-13  | 5.17E-13  | AAEL002810-PA OS=Aedes aegypti GN=AAEL002810 PE=3 SV=1                                         |
| CCG004103.1 | 3621  | 61   | 739 | 0.72387567 | 7.134539225 | 3.30100642  | Up   | 1.75E-14  | 6.18E-14  | AGAP007129-PA OS=Anopheles gambiae GN=AGAP007129 PE=4 SV=4                                     |
| CCG025749.1 | 1146  | 98   | 739 | 3.67454973 | 22.54290274 | 2.617033914 | Up   | 0         | 0         | Uncharacterized protein<br>OS=Anopheles darlingi<br>GN=AND_13112 PE=4 SV=1                     |
| CCG022733.1 | 1073  | 109  | 739 | 4.36505226 | 24.07657645 | 2.463559433 | Up   | 0         | 0         | AAEL006986-PA (Fragment)<br>OS=Aedes aegypti<br>GN=AAEL006986 PE=4 SV=1                        |
| CCG005478.1 | 861   | 244  | 739 | 12.1772535 | 30.00483918 | 1.30100642  | Up   | 2.78E-13  | 7.73E-13  | AAEL010071-PA OS=Aedes aegypti GN=AAEL010071 PE=3 SV=1                                         |
| CCG027701.1 | 1792  | 188  | 740 | 4.50798555 | 14.43589554 | 1.679105813 | Up   | 1.80E-13  | 5.25E-13  | AAEL002097-PA OS=Aedes aegypti GN=AAEL002097 PE=4 SV=1                                         |
| CCG011774.1 | 1853  | 237  | 740 | 5.4958592  | 13.96067178 | 1.344951415 | Up   | 2.32E-13  | 6.61E-13  | Putative uncharacterized protein<br>OS=Culex quinquefasciatus<br>GN=CpipJ_CPIJ011988 PE=4 SV=1 |
| CCG017631.1 | 2346  | 295  | 740 | 5.40327012 | 11.02690742 | 1.02912352  | Up   | 2.32E-13  | 6.62E-13  | AAEL004986-PA (Fragment)<br>OS=Aedes aegypti<br>GN=AAEL004986 PE=4 SV=1                        |

|             |      |      |     |            |             |              |      |           |           |                                                                                                 |
|-------------|------|------|-----|------------|-------------|--------------|------|-----------|-----------|-------------------------------------------------------------------------------------------------|
| CCG025080.1 | 697  | 55   | 741 | 3.39072511 | 37.16511203 | 3.454283223  | Up   | 0         | 0         | AAEL001402-PA OS=Aedes aegypti GN=AAEL001402 PE=4 SV=1                                          |
| CCG027357.1 | 2619 | 86   | 742 | 1.41099549 | 9.904177688 | 2.811323826  | Up   | 0         | 0         | AAEL004896-PA OS=Aedes aegypti GN=AAEL004896 PE=4 SV=1                                          |
| CCG027736.1 | 473  | 122  | 742 | 11.0831028 | 54.83941092 | 2.306851243  | Up   | 8.04E-14  | 2.58E-13  | AAEL001623-PA OS=Aedes aegypti GN=AAEL001623 PE=2 SV=1                                          |
| CCG003087.1 | 1965 | 259  | 742 | 5.6636953  | 13.20052996 | 1.220780293  | Up   | 0         | 0         | AAEL005149-PA (Fragment) OS=Aedes aegypti GN=AAEL005149 PE=4 SV=1                               |
| CCG022626.1 | 2152 | 1315 | 742 | 26.2570637 | 12.05345788 | -1.123258504 | Down | 1.36E-67  | 6.68E-67  | AAEL001104-PA OS=Aedes aegypti GN=AAEL001104 PE=4 SV=1                                          |
| CCG027176.1 | 1012 | 1436 | 742 | 60.9728645 | 25.6314638  | -1.250251453 | Down | 4.35E-87  | 2.24E-86  | Putative short-chain dehydrogenase/reductase Mc1 OS=Aedes aegypti GN=SDR2 PE=2 SV=1             |
| CCG000044.1 | 960  | 2708 | 742 | 121.21046  | 27.01983476 | -2.165423443 | Down | 0         | 0         | AAEL006953-PA OS=Aedes aegypti GN=AAEL006953 PE=4 SV=1                                          |
| CCG020766.1 | 1981 | 101  | 743 | 2.19078405 | 13.11155964 | 2.581320122  | Up   | 0         | 0         | AAEL015455-PA OS=Aedes aegypti GN=AAEL015455 PE=4 SV=1                                          |
| CCG008303.1 | 2283 | 129  | 743 | 2.42798763 | 11.37713519 | 2.228304349  | Up   | 0         | 0         | Zinc finger protein 109 OS=Culex quinquefasciatus GN=CpipJ_CPIJ004616 PE=4 SV=1                 |
| CCG018887.2 | 2719 | 175  | 743 | 2.76561367 | 9.552776624 | 1.788320493  | Up   | 3.55E-13  | 9.57E-13  | AAEL011413-PA OS=Aedes aegypti GN=AAEL011413 PE=4 SV=1                                          |
| CCG011473.1 | 1773 | 266  | 743 | 6.44667197 | 14.64974599 | 1.184249169  | Up   | 4.09E-14  | 1.40E-13  | AAEL002115-PA OS=Aedes aegypti GN=AAEL002115 PE=4 SV=1                                          |
| CCG025953.1 | 1401 | 1559 | 743 | 47.8157147 | 18.53961431 | -1.366873608 | Down | 3.27E-108 | 1.75E-107 | AAEL013654-PA OS=Aedes aegypti GN=AAEL013654 PE=4 SV=1                                          |
| CCG002862.1 | 852  | 2069 | 743 | 104.347865 | 30.48591507 | -1.775186326 | Down | 1.77E-209 | 1.06E-208 | AAEL008601-PA OS=Aedes aegypti GN=AAEL008601 PE=2 SV=1                                          |
| CCG006133.1 | 1485 | 8    | 744 | 0.23148679 | 17.51444978 | 6.241472015  | Up   | 2.19E-06  | 3.97E-06  | AAEL006209-PA OS=Aedes aegypti GN=AAEL006209 PE=4 SV=1                                          |
| CCG005152.1 | 3024 | 98   | 744 | 1.3925377  | 8.600845873 | 2.626762171  | Up   | 0         | 0         | histone-lysine N-methyltransferase ash1 OS=Culex quinquefasciatus GN=CpipJ_CPIJ001202 PE=4 SV=1 |

|             |      |      |     |            |             |              |      |           |           |                                                                                        |
|-------------|------|------|-----|------------|-------------|--------------|------|-----------|-----------|----------------------------------------------------------------------------------------|
| CCG017466.1 | 1225 | 114  | 744 | 3.99881612 | 21.23180238 | 2.408582001  | Up   | 8.48E-14  | 2.70E-13  | AAEL009476-PA OS=Aedes aegypti GN=AAEL009476 PE=4 SV=1                                 |
| CCG010072.1 | 2786 | 114  | 744 | 1.75827342 | 9.3355915   | 2.408582001  | Up   | 8.48E-14  | 2.70E-13  | AAEL006491-PA OS=Aedes aegypti GN=AAEL006491 PE=4 SV=1                                 |
| CCG028042.1 | 2746 | 198  | 744 | 3.09832755 | 9.471579723 | 1.612115395  | Up   | 0         | 0         | XP4-binding protein Z OS=Culex quinquefasciatus GN=CpipJ_CPIJ005885 PE=4 SV=1          |
| CCG021665.1 | 3159 | 280  | 744 | 3.80865011 | 8.233288357 | 1.112188998  | Up   | 0         | 0         | AAEL013108-PA OS=Aedes aegypti GN=AAEL013108 PE=4 SV=1                                 |
| CCG018772.1 | 1998 | 1788 | 744 | 38.4533961 | 13.01749646 | -1.562659006 | Down | 3.82E-151 | 2.17E-150 | AAEL010047-PA OS=Aedes aegypti GN=AAEL010047 PE=3 SV=1                                 |
| CCG025139.1 | 521  | 1976 | 744 | 162.971585 | 49.92122441 | -1.706895217 | Down | 2.03E-189 | 1.20E-188 | Salivary cysteine-rich peptide OS=Culex quinquefasciatus GN=CpipJ_CPIJ006214 PE=4 SV=1 |
| CCG014400.1 | 2046 | 85   | 745 | 1.78515515 | 12.7291868  | 2.834018883  | Up   | 0         | 0         | AAEL005452-PA OS=Aedes aegypti GN=AAEL005452 PE=4 SV=1                                 |
| CCG022180.1 | 1896 | 109  | 746 | 2.47030647 | 13.75468063 | 2.477160699  | Up   | 0         | 0         | AAEL007208-PA OS=Aedes aegypti GN=AAEL007208 PE=4 SV=1                                 |
| CCG017889.2 | 2412 | 110  | 746 | 1.95964793 | 10.81213701 | 2.463985311  | Up   | 0         | 0         | AAEL013590-PA OS=Aedes aegypti GN=AAEL013590 PE=4 SV=1                                 |
| CCG001238.1 | 720  | 300  | 746 | 17.9040561 | 36.22065899 | 1.016526334  | Up   | 1.10E-13  | 3.42E-13  | AAEL000939-PA OS=Aedes aegypti GN=AAEL000939 PE=4 SV=1                                 |
| CCG017056.1 | 255  | 2446 | 746 | 412.172435 | 102.270096  | -2.010863664 | Down | 5.40E-293 | 3.39E-292 | AAEL008802-PA OS=Aedes aegypti GN=AAEL008802 PE=4 SV=1                                 |
| CCG002482.1 | 1254 | 7    | 747 | 0.23986295 | 20.82442803 | 6.439922715  | Up   | 4.31E-06  | 7.70E-06  | AAEL006884-PA OS=Aedes aegypti GN=AAEL006884 PE=4 SV=1                                 |
| CCG005515.1 | 1757 | 62   | 747 | 1.51629115 | 14.86273919 | 3.293081326  | Up   | 0         | 0         | AAEL006177-PA OS=Aedes aegypti GN=AAEL006177 PE=4 SV=1                                 |
| CCG027119.1 | 1848 | 93   | 747 | 2.16243794 | 14.13086188 | 2.708118825  | Up   | 4.04E-14  | 1.39E-13  | AAEL010986-PA (Fragment) OS=Aedes aegypti GN=AAEL010986 PE=3 SV=1                      |
| CCG025587.1 | 1938 | 126  | 747 | 2.79369792 | 13.4746299  | 2.269997713  | Up   | 1.34E-13  | 4.06E-13  | AAEL002136-PA OS=Aedes aegypti GN=AAEL002136 PE=4 SV=1                                 |
| CCG021335.1 | 1128 | 144  | 747 | 5.48549804 | 23.15056095 | 2.077352635  | Up   | 7.53E-14  | 2.44E-13  | AAEL013389-PA OS=Aedes aegypti GN=AAEL013389 PE=4 SV=1                                 |

|             |      |      |     |            |             |              |      |           |           |                                                                                   |
|-------------|------|------|-----|------------|-------------|--------------|------|-----------|-----------|-----------------------------------------------------------------------------------|
| CCG021819.1 | 2514 | 247  | 747 | 4.22176788 | 10.38736386 | 1.298910405  | Up   | 0         | 0         | AAEL010569-PA OS=Aedes aegypti GN=AAEL010569 PE=4 SV=1                            |
| CCG024445.1 | 2788 | 2463 | 747 | 37.9607089 | 9.366511029 | -2.018923276 | Down | 1.40E-296 | 8.81E-296 | AAEL006240-PA OS=Aedes aegypti GN=AAEL006240 PE=4 SV=1                            |
| CCG008821.1 | 300  | 8    | 748 | 1.14585959 | 87.16263675 | 6.249207664  | Up   | 2.19E-06  | 3.97E-06  | Defensin OS=Culex quinquefasciatus PE=4 SV=1                                      |
| CCG023463.1 | 1602 | 39   | 748 | 1.04607968 | 16.32259115 | 3.963805445  | Up   | 7.33E-14  | 2.38E-13  | AAEL003878-PA OS=Aedes aegypti GN=AAEL003878 PE=4 SV=1                            |
| CCG008013.1 | 1023 | 288  | 748 | 12.0970514 | 25.56089054 | 1.079282662  | Up   | 0         | 0         | Methylthioribose-1-phosphate isomerase OS=Glossina morsitans morsitans PE=2 SV=1  |
| CCG023669.1 | 1204 | 52   | 749 | 1.85583571 | 21.74730009 | 3.550695394  | Up   | 0         | 0         | AAEL002045-PA OS=Aedes aegypti GN=AAEL002045 PE=4 SV=1                            |
| CCG005845.1 | 1875 | 173  | 749 | 3.96467418 | 13.96466629 | 1.816506885  | Up   | 3.60E-13  | 9.68E-13  | Mitochondrial GTPase 1 OS=Culex quinquefasciatus GN=CpipJ_CPIJ017444 PE=3 SV=1    |
| CCG028506.1 | 1152 | 222  | 749 | 8.28062594 | 22.72894905 | 1.456719246  | Up   | 0         | 0         | AAEL000463-PA OS=Aedes aegypti GN=AAEL000463 PE=4 SV=1                            |
| CCG015331.1 | 1326 | 1591 | 749 | 51.5572004 | 19.74641727 | -1.384583008 | Down | 1.45E-112 | 7.83E-112 | AAEL004137-PA OS=Aedes aegypti GN=AAEL004137 PE=3 SV=1                            |
| CCG002829.1 | 1965 | 17   | 750 | 0.37174834 | 13.34285373 | 5.165597148  | Up   | 3.39E-09  | 6.88E-09  | AAEL002281-PA OS=Aedes aegypti GN=AAEL002281 PE=4 SV=1                            |
| CCG024403.1 | 1731 | 74   | 750 | 1.83694995 | 15.14656706 | 3.043606624  | Up   | 0         | 0         | AAEL002751-PA OS=Aedes aegypti GN=AAEL002751 PE=4 SV=1                            |
| CCG006027.1 | 1519 | 92   | 750 | 2.60251191 | 17.26050532 | 2.729498033  | Up   | 1.44E-14  | 5.12E-14  | AAEL012931-PA OS=Aedes aegypti GN=AAEL012931 PE=4 SV=1                            |
| CCG011073.1 | 984  | 170  | 750 | 7.42363301 | 26.64502803 | 1.843669053  | Up   | 3.53E-13  | 9.52E-13  | Short-chain dehydrogenase OS=Culex quinquefasciatus GN=CpipJ_CPIJ009166 PE=3 SV=1 |
| CCG021023.1 | 4213 | 256  | 750 | 2.61102589 | 6.223286869 | 1.253059989  | Up   | 0         | 0         | AAEL006226-PA OS=Aedes aegypti GN=AAEL006226 PE=4 SV=1                            |
| CCG012256.1 | 678  | 69   | 751 | 4.37302609 | 38.72222103 | 3.146457845  | Up   | 0         | 0         | GM16159 OS=Drosophila sechellia GN=GM16159 PE=4 SV=1                              |

|             |      |      |     |            |             |              |      |           |           |                                                                                                                 |
|-------------|------|------|-----|------------|-------------|--------------|------|-----------|-----------|-----------------------------------------------------------------------------------------------------------------|
| CCG011183.1 | 1140 | 293  | 751 | 11.0439757 | 23.02953145 | 1.060225447  | Up   | 4.19E-13  | 1.11E-12  | StAR-related lipid transfer domain containing protein OS=Aedes aegypti PE=2 SV=1                                |
| CCG014159.1 | 2871 | 296  | 751 | 4.43017814 | 9.144432552 | 1.045528936  | Up   | 2.26E-13  | 6.47E-13  | AAEL001581-PA OS=Aedes aegypti GN=AAEL001581 PE=4 SV=1                                                          |
| CCG024801.1 | 1037 | 296  | 751 | 12.265228  | 25.31693911 | 1.045528936  | Up   | 2.26E-13  | 6.47E-13  | AAEL000421-PA OS=Aedes aegypti GN=AAEL000421 PE=4 SV=1                                                          |
| CCG016003.1 | 2081 | 305  | 751 | 6.29782271 | 12.61588941 | 1.002316869  | Up   | 5.30E-13  | 1.37E-12  | AAEL002329-PB OS=Aedes aegypti GN=AAEL002329 PE=4 SV=1                                                          |
| CCG009653.1 | 879  | 107  | 752 | 5.23067304 | 29.90742222 | 2.515435069  | Up   | 0         | 0         | AAEL013942-PA OS=Aedes aegypti GN=AAEL013942 PE=4 SV=1                                                          |
| CCG020515.1 | 3075 | 127  | 752 | 1.77468497 | 8.549146059 | 2.268217369  | Up   | 1.57E-13  | 4.66E-13  | AAEL010600-PA OS=Aedes aegypti GN=AAEL010600 PE=4 SV=1                                                          |
| CCG019494.1 | 1056 | 101  | 753 | 4.10979469 | 24.92763486 | 2.600607776  | Up   | 0         | 0         | AAEL004285-PA OS=Aedes aegypti GN=AAEL004285 PE=4 SV=1                                                          |
| CCG014271.1 | 1389 | 101  | 753 | 3.12450914 | 18.95146322 | 2.600607776  | Up   | 0         | 0         | AAEL012211-PA OS=Aedes aegypti GN=AAEL012211 PE=4 SV=1                                                          |
| CCG017114.1 | 1239 | 107  | 753 | 3.71086489 | 21.24582922 | 2.517352272  | Up   | 0         | 0         | AAEL000502-PA (Fragment) OS=Aedes aegypti GN=AAEL000502 PE=4 SV=1                                               |
| CCG006657.1 | 1338 | 161  | 753 | 5.17049871 | 19.67382841 | 1.92790238   | Up   | 0         | 0         | AAEL002159-PA OS=Aedes aegypti GN=AAEL002159 PE=4 SV=1                                                          |
| CCG002570.1 | 836  | 286  | 753 | 14.7001724 | 31.48753877 | 1.098947922  | Up   | 0         | 0         | AAEL004570-PA OS=Aedes aegypti GN=AAEL004570 PE=4 SV=1                                                          |
| CCG016373.1 | 3896 | 1530 | 753 | 16.8746648 | 6.756566327 | -1.320496679 | Down | 8.48E-101 | 4.50E-100 | AAEL005763-PA (Fragment) OS=Aedes aegypti GN=AAEL005763 PE=4 SV=1                                               |
| CCG023039.1 | 1863 | 154  | 754 | 3.55198021 | 14.14843837 | 1.993947376  | Up   | 1.82E-13  | 5.29E-13  | JmjC domain-containing histone demethylation protein 3C OS=Culex quinquefasciatus GN=CpipJ_CPIJ011492 PE=4 SV=1 |
| CCG002218.1 | 1791 | 225  | 754 | 5.39820787 | 14.71721981 | 1.446952726  | Up   | 0         | 0         | AAEL002828-PB (Fragment) OS=Aedes aegypti GN=AAEL002828 PE=4 SV=1                                               |



|             |       |      |     |            |             |              |      |           |           |                                                                                          |
|-------------|-------|------|-----|------------|-------------|--------------|------|-----------|-----------|------------------------------------------------------------------------------------------|
| CCG017290.1 | 1697  | 1485 | 754 | 37.6016829 | 15.53243411 | -1.275513299 | Down | 8.07E-93  | 4.22E-92  | AAEL014762-PA OS=Aedes aegypti GN=AAEL014762 PE=4 SV=1                                   |
| CCG021032.1 | 2148  | 2099 | 754 | 41.9895125 | 12.27120144 | -1.774752534 | Down | 2.06E-212 | 1.24E-211 | Uncharacterized protein OS=Anopheles darlingi GN=AND_18243 PE=4 SV=1                     |
| CCG007045.1 | 1787  | 2598 | 754 | 62.4708285 | 14.75016267 | -2.082451798 | Down | 0         | 0         | Galactose-1-phosphate uridylyltransferase OS=Aedes aegypti GN=AAEL001607 PE=3 SV=1       |
| CCG022950.1 | 1735  | 81   | 755 | 2.00607983 | 15.21239133 | 2.922796035  | Up   | 4.46E-14  | 1.51E-13  | AAEL004945-PA (Fragment) OS=Aedes aegypti GN=AAEL004945 PE=4 SV=1                        |
| CCG011503.1 | 2703  | 122  | 755 | 1.93944048 | 9.764520519 | 2.3319087    | Up   | 8.04E-14  | 2.58E-13  | Putative uncharacterized protein OS=Culex quinquefasciatus GN=CpipJ_CPIJ015878 PE=4 SV=1 |
| CCG006917.1 | 1105  | 152  | 755 | 5.91076892 | 23.88551942 | 2.014718525  | Up   | 8.39E-14  | 2.69E-13  | AAEL009356-PA OS=Aedes aegypti GN=AAEL009356 PE=4 SV=1                                   |
| CCG018662.1 | 1328  | 154  | 755 | 4.98293609 | 19.87462271 | 1.995859497  | Up   | 1.82E-13  | 5.28E-13  | AAEL014061-PA (Fragment) OS=Aedes aegypti GN=AAEL014061 PE=4 SV=1                        |
| CCG025205.1 | 1579  | 155  | 755 | 4.21805501 | 16.7153255  | 1.986521633  | Up   | 3.42E-13  | 9.26E-13  | AAEL007811-PA OS=Aedes aegypti GN=AAEL007811 PE=2 SV=1                                   |
| CCG019859.1 | 18463 | 212  | 755 | 0.49339673 | 1.429534689 | 1.534725583  | Up   | 0         | 0         | AAEL007993-PA OS=Aedes aegypti GN=CLIPB27 PE=3 SV=1                                      |
| CCG024607.1 | 315   | 1617 | 755 | 220.577971 | 83.7888856  | -1.396457925 | Down | 7.42E-116 | 4.02E-115 | W-rich putative salivary secreted peptide OS=Aedes albopictus PE=4 SV=1                  |
| CCG020869.1 | 3429  | 34   | 756 | 0.42606328 | 7.707336611 | 4.177092787  | Up   | 8.82E-14  | 2.80E-13  | AAEL000201-PA (Fragment) OS=Aedes aegypti GN=AAEL000201 PE=4 SV=1                        |
| CCG019378.3 | 3936  | 36   | 756 | 0.39301587 | 6.714547063 | 4.094630627  | Up   | 6.13E-14  | 2.03E-13  | AAEL006658-PA OS=Aedes aegypti GN=AAEL006658 PE=4 SV=1                                   |
| CCG018690.1 | 651   | 189  | 756 | 12.4750842 | 40.59670851 | 1.702313204  | Up   | 2.34E-13  | 6.64E-13  | AAEL004632-PA OS=Aedes aegypti GN=AAEL004632 PE=4 SV=1                                   |

|             |      |      |     |            |             |              |      |           |            |                                                                                                                   |
|-------------|------|------|-----|------------|-------------|--------------|------|-----------|------------|-------------------------------------------------------------------------------------------------------------------|
| CCG009005.1 | 1836 | 129  | 757 | 3.01911534 | 14.41362501 | 2.255235438  | Up   | 0         | 0          | Lamin OS=Culex quinquefasciatus<br>GN=CpipJ_CPIJ014365 PE=4<br>SV=1                                               |
| CCG022387.1 | 1296 | 1756 | 758 | 58.2213379 | 20.44627608 | -1.509709888 | Down | 3.74E-141 | 2.10E-140  | AAEL000516-PA OS=Aedes<br>aegypti GN=AAEL000516 PE=4<br>SV=1                                                      |
| CCG004239.3 | 2730 | 2035 | 758 | 32.0305531 | 9.706364027 | -1.722445837 | Down | 1.57E-197 | 9.36E-197  | AAEL007024-PA OS=Aedes<br>aegypti GN=CYP6AG3 PE=3<br>SV=1                                                         |
| CCG013319.1 | 804  | 2156 | 758 | 115.227298 | 32.95817636 | -1.805774221 | Down | 1.90E-223 | 1.15E-222  | AAEL007659-PA OS=Aedes<br>aegypti GN=AAEL007659 PE=4<br>SV=1                                                      |
| CCG012464.1 | 1534 | 37   | 759 | 1.03642776 | 17.29682664 | 4.060815914  | Up   | 5.17E-14  | 1.74E-13   | AAEL001785-PA OS=Aedes<br>aegypti GN=AAEL001785 PE=4<br>SV=1                                                      |
| CCG011158.1 | 2982 | 44   | 759 | 0.63402694 | 8.897831009 | 3.810837661  | Up   | 3.91E-14  | 1.35E-13   | Riepper OS=Culex<br>quinquefasciatus<br>GN=CpipJ_CPIJ004355 PE=4<br>SV=1                                          |
| CCG024034.1 | 1770 | 64   | 759 | 1.55370792 | 14.99058309 | 3.270269279  | Up   | 0         | 0          | AAEL004654-PA OS=Aedes<br>aegypti GN=AAEL004654 PE=4<br>SV=1                                                      |
| CCG004803.1 | 1078 | 91   | 759 | 3.62731526 | 24.61348058 | 2.762474639  | Up   | 0         | 0          | Hybrid hormone receptor-<br>associated protein 6 OS=Culex<br>quinquefasciatus<br>GN=CpipJ_CPIJ004789 PE=4<br>SV=1 |
| CCG008517.1 | 5348 | 124  | 759 | 0.99630649 | 4.961356034 | 2.316072969  | Up   | 1.61E-13  | 4.76E-13   | AAEL010698-PA (Fragment)<br>OS=Aedes aegypti<br>GN=AAEL010698 PE=4 SV=1                                           |
| CCG009856.1 | 1179 | 2    | 760 | 0.07289183 | 22.53459741 | 8.272168812  | Up   | 9.36E-05  | 0.00015399 | AAEL012453-PA OS=Aedes<br>aegypti GN=AAEL012453 PE=4<br>SV=1                                                      |
| CCG017182.1 | 2154 | 93   | 760 | 1.85523924 | 12.33439663 | 2.733010001  | Up   | 4.04E-14  | 1.38E-13   | AAEL013590-PA OS=Aedes<br>aegypti GN=AAEL013590 PE=4<br>SV=1                                                      |
| CCG023973.1 | 1011 | 171  | 760 | 7.26787796 | 26.27921894 | 1.854316297  | Up   | 3.42E-13  | 9.27E-13   | AAEL007015-PA OS=Aedes<br>aegypti GN=AAEL007015 PE=4<br>SV=1                                                      |
| CCG014863.1 | 2559 | 200  | 760 | 3.35832236 | 10.382294   | 1.628312622  | Up   | 0         | 0          | AAEL008539-PA OS=Aedes<br>aegypti GN=AAEL008539 PE=4<br>SV=1                                                      |
| CCG025490.1 | 2582 | 241  | 760 | 4.01073046 | 10.28981036 | 1.359279476  | Up   | 2.37E-13  | 6.71E-13   | AAEL000853-PA OS=Aedes<br>aegypti GN=AAEL000853 PE=4<br>SV=1                                                      |
| CCG026698.1 | 613  | 257  | 760 | 18.0150437 | 43.34141982 | 1.266544263  | Up   | 4.14E-13  | 1.10E-12   | AAEL000983-PA OS=Aedes<br>aegypti GN=AAEL000983 PE=4<br>SV=1                                                      |

|             |      |      |     |            |             |              |      |           |           |                                                                                                            |
|-------------|------|------|-----|------------|-------------|--------------|------|-----------|-----------|------------------------------------------------------------------------------------------------------------|
| CCG010785.2 | 2333 | 280  | 760 | 5.15710488 | 11.38803701 | 1.142885795  | Up   | 0         | 0         | AAEL007151-PA OS=Aedes aegypti GN=AAEL007151 PE=4 SV=1                                                     |
| CCG003816.1 | 3243 | 3333 | 760 | 44.1622342 | 8.192503961 | -2.43043679  | Down | 0         | 0         | AAEL008635-PA OS=Aedes aegypti GN=AAEL008635 PE=3 SV=1                                                     |
| CCG002424.1 | 273  | 89   | 761 | 14.0084483 | 97.44779716 | 2.798332416  | Up   | 0         | 0         | AAEL006830-PA OS=Aedes aegypti GN=AAEL006830 PE=4 SV=1                                                     |
| CCG017174.1 | 951  | 95   | 761 | 4.29245509 | 27.97397332 | 2.704210239  | Up   | 0         | 0         | AAEL011301-PA OS=Aedes aegypti GN=AAEL011301 PE=4 SV=1                                                     |
| CCG027540.1 | 1524 | 227  | 761 | 6.40034761 | 17.45619988 | 1.44751736   | Up   | 0         | 0         | AAEL015415-PA OS=Aedes aegypti GN=AAEL015415 PE=4 SV=1                                                     |
| CCG000033.1 | 3494 | 304  | 761 | 3.73863747 | 7.613980717 | 1.026138334  | Up   | 0         | 0         | Peptidase OS=Culex quinquefasciatus GN=CpipJ_CPIJ014636 PE=4 SV=1                                          |
| CCG027127.1 | 1489 | 306  | 761 | 8.83058347 | 17.86652023 | 1.016678005  | Up   | 0         | 0         | Ultraspiracle OS=Aedes albopictus GN=USP PE=2 SV=1                                                         |
| CCG025903.1 | 1866 | 2165 | 761 | 49.8550243 | 14.25683206 | -1.806085462 | Down | 2.00E-224 | 1.21E-223 | AAEL004567-PA OS=Aedes aegypti GN=AAEL004567 PE=4 SV=1                                                     |
| CCG019181.1 | 1622 | 8    | 762 | 0.21193457 | 16.42306221 | 6.275960391  | Up   | 2.19E-06  | 3.97E-06  | Cytochrome P450 6CB1 (Fragment) OS=Aedes aegypti GN=CYP6CB1 PE=2 SV=1                                      |
| CCG009203.1 | 1134 | 85   | 762 | 3.22083549 | 23.49048228 | 2.866569455  | Up   | 0         | 0         | AAEL003124-PA OS=Aedes aegypti GN=AAEL003124 PE=4 SV=1                                                     |
| CCG002269.1 | 2162 | 121  | 762 | 2.40487414 | 12.32109477 | 2.357097154  | Up   | 0         | 0         | AAEL003273-PA OS=Aedes aegypti GN=AAEL003273 PE=4 SV=1                                                     |
| CCG017522.1 | 2508 | 196  | 762 | 3.35808133 | 10.62129462 | 1.661250547  | Up   | 7.93E-14  | 2.55E-13  | Glutamyl-tRNA(Gln) amidotransferase subunit A, mitochondrial OS=Drosophila mojavensis GN=GI22341 PE=3 SV=1 |
| CCG024784.1 | 1576 | 280  | 762 | 7.63421681 | 16.90241555 | 1.146677374  | Up   | 0         | 0         | AAEL011912-PA OS=Aedes aegypti GN=AAEL011912 PE=2 SV=1                                                     |
| CCG018676.1 | 1816 | 77   | 764 | 1.82195461 | 14.70711644 | 3.012955491  | Up   | 0         | 0         | AAEL009786-PA OS=Aedes aegypti GN=AAEL009786 PE=4 SV=1                                                     |

|             |       |      |     |            |             |              |      |           |           |                                                                                                 |
|-------------|-------|------|-----|------------|-------------|--------------|------|-----------|-----------|-------------------------------------------------------------------------------------------------|
| CCG011675.1 | 1296  | 95   | 764 | 3.14978765 | 20.60811995 | 2.709886424  | Up   | 0         | 0         | AAEL004371-PA (Fragment)<br>OS=Aedes aegypti<br>GN=AAEL004371 PE=4 SV=1                         |
| CCG012326.1 | 1516  | 244  | 764 | 6.91597312 | 17.61749568 | 1.349004694  | Up   | 2.78E-13  | 7.73E-13  | UDP-galactose transporter<br>OS=Culex quinquefasciatus<br>GN=CpipJ_CPIJ007457 PE=4<br>SV=1      |
| CCG010047.1 | 1131  | 1736 | 764 | 65.9553132 | 23.6146096  | -1.481809201 | Down | 9.02E-136 | 5.04E-135 | -                                                                                               |
| CCG021397.1 | 6170  | 24   | 765 | 0.16714321 | 4.334373052 | 4.696666641  | Up   | 1.93E-11  | 4.24E-11  | Polyprotein OS=Antheraea mylitta<br>PE=4 SV=1                                                   |
| CCG015241.1 | 912   | 28   | 765 | 1.31924624 | 29.32355453 | 4.474274219  | Up   | 1.17E-12  | 2.85E-12  | AAEL010327-PA OS=Aedes<br>aegypti GN=AAEL010327 PE=3<br>SV=1                                    |
| CCG008031.1 | 3603  | 248  | 765 | 2.95767255 | 7.42244844  | 1.327432831  | Up   | 5.86E-14  | 1.95E-13  | Aluminate kinase SKIZ OS=Culex<br>quinquefasciatus<br>GN=CpipJ_CPIJ003293 PE=4<br>SV=1          |
| CCG002999.1 | 1216  | 287  | 765 | 10.1417055 | 21.9926659  | 1.116722215  | Up   | 2.87E-13  | 7.99E-13  | AAEL014050-PA OS=Aedes<br>aegypti GN=AAEL014050 PE=4<br>SV=1                                    |
| CCG021783.1 | 1671  | 18   | 766 | 0.46286967 | 16.02515859 | 5.113588784  | Up   | 1.62E-09  | 3.33E-09  | AAEL009057-PA OS=Aedes<br>aegypti GN=AAEL009057 PE=3<br>SV=1                                    |
| CCG026554.1 | 1495  | 49   | 766 | 1.40837257 | 17.91173245 | 3.668803942  | Up   | 0         | 0         | AAEL011838-PA OS=Aedes<br>aegypti GN=AAEL011838 PE=4<br>SV=1                                    |
| CCG021616.1 | 1859  | 72   | 766 | 1.66423932 | 14.40454008 | 3.113588784  | Up   | 0         | 0         | Cell division protein kinase 6<br>OS=Culex quinquefasciatus<br>GN=CpipJ_CPIJ000891 PE=4<br>SV=1 |
| CCG022837.1 | 1341  | 295  | 766 | 9.45270075 | 19.96870992 | 1.078942641  | Up   | 2.32E-13  | 6.62E-13  | Spastin OS=Culex<br>quinquefasciatus<br>GN=CpipJ_CPIJ013667 PE=3<br>SV=1                        |
| CCG003046.1 | 2214  | 305  | 766 | 5.91949822 | 12.09486902 | 1.030848353  | Up   | 5.30E-13  | 1.37E-12  | AAEL010404-PA OS=Aedes<br>aegypti GN=AAEL010404 PE=4<br>SV=1                                    |
| CCG021962.1 | 18936 | 1477 | 766 | 3.35162115 | 1.414133925 | -1.244940325 | Down | 6.22E-89  | 3.23E-88  | AAEL010769-PA OS=Aedes<br>aegypti GN=SRPN6 PE=3 SV=1                                            |
| CCG008081.1 | 4440  | 1631 | 766 | 15.784603  | 6.031090092 | -1.388027281 | Down | 8.84E-116 | 4.80E-115 | AAEL000564-PA OS=Aedes<br>aegypti GN=AAEL000564 PE=4<br>SV=1                                    |
| CCG019819.1 | 3219  | 176  | 767 | 2.34938592 | 8.329604935 | 1.825964353  | Up   | 0         | 0         | AAEL009289-PA OS=Aedes<br>aegypti GN=AAEL009289 PE=4<br>SV=1                                    |
| CCG028570.1 | 2209  | 192  | 767 | 3.73480717 | 12.13807075 | 1.700433471  | Up   | 0         | 0         | AAEL006459-PA OS=Aedes<br>aegypti GN=AAEL006459 PE=4<br>SV=1                                    |

|             |      |      |     |            |             |              |      |           |           |                                                                                          |
|-------------|------|------|-----|------------|-------------|--------------|------|-----------|-----------|------------------------------------------------------------------------------------------|
| CCG013655.1 | 6722 | 270  | 767 | 1.72594888 | 3.988842351 | 1.208580374  | Up   | 2.59E-13  | 7.26E-13  | AAEL010461-PA OS=Aedes aegypti GN=AAEL010461 PE=4 SV=1                                   |
| CCG016411.1 | 1647 | 1250 | 767 | 32.612124  | 16.27990181 | -1.002316408 | Down | 1.16E-53  | 5.50E-53  | AAEL010348-PA OS=Aedes aegypti GN=AAEL010348 PE=3 SV=1                                   |
| CCG013132.1 | 765  | 204  | 768 | 11.4585959 | 35.09536805 | 1.614850363  | Up   | 6.59E-14  | 2.17E-13  | AAEL009809-PA OS=Aedes aegypti GN=AAEL009809 PE=4 SV=1                                   |
| CCG003004.1 | 1614 | 1784 | 768 | 47.495667  | 16.63442166 | -1.513624195 | Down | 6.38E-144 | 3.60E-143 | AAEL008672-PA OS=Aedes aegypti GN=AAEL008672 PE=3 SV=1                                   |
| CCG004569.1 | 1612 | 190  | 769 | 5.06467095 | 16.67674618 | 1.719297383  | Up   | 2.69E-13  | 7.53E-13  | Cen division protein kinase 9 OS=Culex quinquefasciatus GN=CpipJ_CPIJ008862 PE=4 SV=1    |
| CCG011741.1 | 2040 | 203  | 769 | 4.27590987 | 13.17789943 | 1.623817075  | Up   | 9.28E-14  | 2.93E-13  | AAEL007387-PA OS=Aedes aegypti GN=AAEL007387 PE=4 SV=1                                   |
| CCG015209.1 | 816  | 250  | 769 | 13.1647471 | 32.94474858 | 1.323368707  | Up   | 2.10E-13  | 6.02E-13  | Putative uncharacterized protein OS=Culex quinquefasciatus GN=CpipJ_CPIJ003086 PE=4 SV=1 |
| CCG020066.3 | 3699 | 89   | 770 | 1.03387574 | 7.277067617 | 2.815294408  | Up   | 0         | 0         | AAEL015044-PA OS=Aedes aegypti GN=AAEL015044 PE=4 SV=1                                   |
| CCG025120.1 | 815  | 108  | 770 | 5.69414888 | 33.02806517 | 2.536140337  | Up   | 0         | 0         | AAEL005882-PA (Fragment) OS=Aedes aegypti GN=AAEL005882 PE=4 SV=1                        |
| CCG023747.3 | 1914 | 189  | 770 | 4.24309292 | 14.06367456 | 1.728785415  | Up   | 2.34E-13  | 6.64E-13  | AAEL009262-PA OS=Aedes aegypti GN=AAEL009262 PE=4 SV=1                                   |
| CCG011418.1 | 3049 | 227  | 770 | 3.19912422 | 8.828426735 | 1.464479352  | Up   | 0         | 0         | AAEL010512-PA OS=Aedes aegypti GN=AAEL010512 PE=4 SV=1                                   |
| CCG028236.1 | 1053 | 2846 | 770 | 116.136624 | 25.5630324  | -2.183692107 | Down | 0         | 0         | AGAP000969-PB OS=Anopheles gambiae GN=AgaP_AGAP000969 PE=4 SV=1                          |
| CCG007224.1 | 3045 | 54   | 771 | 0.76202485 | 8.851504562 | 3.538012752  | Up   | 0         | 0         | AAEL005047-PA OS=Aedes aegypti GN=AAEL005047 PE=4 SV=1                                   |
| CCG019810.1 | 3169 | 75   | 772 | 1.01695491 | 8.516184812 | 3.065951551  | Up   | 0         | 0         | Putative uncharacterized protein OS=Culex quinquefasciatus GN=CpipJ_CPIJ001516 PE=4 SV=1 |
| CCG000213.1 | 1212 | 79   | 772 | 2.80083254 | 22.26715319 | 2.990989493  | Up   | 0         | 0         | AAEL003868-PA OS=Aedes aegypti GN=AAEL003868 PE=4 SV=1                                   |

|             |       |      |     |            |             |              |      |          |            |                                                        |
|-------------|-------|------|-----|------------|-------------|--------------|------|----------|------------|--------------------------------------------------------|
| CCG026640.1 | 2564  | 92   | 772 | 1.54181575 | 10.525659   | 2.771208285  | Up   | 1.44E-14 | 5.11E-14   | AAEL003170-PA OS=Aedes aegypti GN=AAEL003170 PE=4 SV=1 |
| CCG016128.1 | 2937  | 94   | 772 | 1.3752656  | 9.188896721 | 2.740181389  | Up   | 0        | 0          | Transporter OS=Aedes aegypti GN=AAEL006800 PE=3 SV=1   |
| CCG025407.1 | 2011  | 253  | 772 | 5.40593877 | 13.42008437 | 1.311776666  | Up   | 3.13E-13 | 8.62E-13   | AAEL014582-PA OS=Aedes aegypti GN=AAEL014582 PE=4 SV=1 |
| CCG015826.1 | 1470  | 253  | 772 | 7.39547133 | 18.35904059 | 1.311776666  | Up   | 3.13E-13 | 8.62E-13   | AAEL002214-PA OS=Aedes aegypti GN=AAEL002214 PE=4 SV=1 |
| CCG001117.1 | 1326  | 261  | 772 | 8.45784369 | 20.35278256 | 1.266864245  | Up   | 8.02E-14 | 2.58E-13   | AAEL000875-PA OS=Aedes aegypti GN=AAEL000875 PE=4 SV=1 |
| CCG012733.1 | 13512 | 5318 | 772 | 16.9118597 | 1.997320135 | -3.081897821 | Down | 0        | 0          | AAEL008855-PA OS=Aedes aegypti GN=AAEL008855 PE=4 SV=1 |
| CCG004494.1 | 1047  | 0    | 773 | 0.001      | 25.8096924  | 14.65562533  | Up   | 4.44E-16 | 1.64E-15   | AAEL007783-PA OS=Aedes aegypti GN=AAEL007783 PE=4 SV=1 |
| CCG019030.1 | 1566  | 26   | 773 | 0.71341833 | 17.25590546 | 4.59619809   | Up   | 4.60E-12 | 1.05E-11   | AAEL010598-PA OS=Aedes aegypti GN=AAEL010598 PE=4 SV=1 |
| CCG025891.1 | 3927  | 109  | 773 | 1.1926919  | 6.881270167 | 2.528453483  | Up   | 0        | 0          | AAEL010633-PA OS=Aedes aegypti GN=AAEL010633 PE=4 SV=1 |
| CCG002085.1 | 2499  | 155  | 773 | 2.66518962 | 10.81342455 | 2.020513402  | Up   | 3.42E-13 | 9.27E-13   | AAEL007512-PA OS=Aedes aegypti GN=AAEL007512 PE=4 SV=1 |
| CCG024057.1 | 2300  | 245  | 773 | 4.57721086 | 11.74902085 | 1.359999869  | Up   | 3.40E-13 | 9.24E-13   | AAEL013631-PA OS=Aedes aegypti GN=AAEL013631 PE=4 SV=1 |
| CCG019308.1 | 1023  | 0    | 774 | 0.001      | 26.4493707  | 14.69094578  | Up   | 4.44E-16 | 1.63E-15   | AAEL013715-PA OS=Aedes aegypti GN=AAEL013715 PE=3 SV=1 |
| CCG021609.1 | 1155  | 136  | 774 | 5.05963975 | 23.42658547 | 2.211040119  | Up   | 1.70E-13 | 4.98E-13   | AAEL008391-PA OS=Aedes aegypti GN=AAEL008391 PE=4 SV=1 |
| CCG011103.1 | 357   | 227  | 774 | 27.3224923 | 75.79189418 | 1.471954473  | Up   | 0        | 0          | AAEL003764-PA OS=Aedes aegypti GN=AAEL003764 PE=4 SV=1 |
| CCG004807.1 | 1314  | 229  | 774 | 7.48863716 | 20.59186166 | 1.459299172  | Up   | 2.46E-13 | 6.92E-13   | AAEL007885-PA OS=Aedes aegypti GN=AAEL007885 PE=4 SV=1 |
| CCG016125.1 | 1170  | 2    | 775 | 0.07345254 | 23.1561235  | 8.300365704  | Up   | 9.36E-05 | 0.00015361 | AAEL006726-PA OS=Aedes aegypti GN=AAEL006726 PE=4 SV=1 |
| CCG023393.1 | 3780  | 155  | 775 | 1.76198647 | 7.16737156  | 2.024241299  | Up   | 3.42E-13 | 9.28E-13   | AAEL009294-PA OS=Aedes aegypti GN=AAEL009294 PE=4 SV=1 |

|             |      |     |     |            |             |             |    |          |            |                                                                   |
|-------------|------|-----|-----|------------|-------------|-------------|----|----------|------------|-------------------------------------------------------------------|
| CCG027036.3 | 1770 | 67  | 776 | 1.62653798 | 15.32634055 | 3.236136856 | Up | 0        | 0          | AAEL006338-PA OS=Aedes aegypti GN=AAEL006338 PE=2 SV=1            |
| CCG002276.1 | 1170 | 8   | 777 | 0.29381015 | 23.21588124 | 6.304083992 | Up | 2.19E-06 | 3.96E-06   | AAEL006726-PA OS=Aedes aegypti GN=AAEL006726 PE=4 SV=1            |
| CCG007183.1 | 3129 | 50  | 777 | 0.68663686 | 8.680914366 | 3.660227802 | Up | 0        | 0          | AAEL007123-PA (Fragment) OS=Aedes aegypti GN=AAEL007123 PE=3 SV=2 |
| CCG019687.1 | 1254 | 112 | 777 | 3.83780724 | 21.66075044 | 2.49672907  | Up | 0        | 0          | AAEL005582-PA OS=Aedes aegypti GN=AAEL005582 PE=4 SV=1            |
| CCG013804.1 | 1333 | 167 | 778 | 5.38330509 | 20.40325531 | 1.922235256 | Up | 1.62E-13 | 4.78E-13   | AAEL009971-PA OS=Aedes aegypti GN=AAEL009971 PE=4 SV=1            |
| CCG000477.1 | 1294 | 77  | 779 | 2.55693166 | 21.0452068  | 3.041006181 | Up | 0        | 0          | AAEL000130-PA OS=Aedes aegypti GN=AAEL000130 PE=4 SV=1            |
| CCG009641.1 | 1512 | 98  | 779 | 2.78507539 | 18.01091111 | 2.693082878 | Up | 0        | 0          | AAEL014868-PA OS=Aedes aegypti GN=AAEL014868 PE=4 SV=1            |
| CCG001043.1 | 1548 | 166 | 779 | 4.6078656  | 17.59205272 | 1.932753291 | Up | 1.83E-13 | 5.32E-13   | AAEL000262-PA OS=Aedes aegypti GN=AAEL000262 PE=4 SV=1            |
| CCG011354.1 | 551  | 1   | 780 | 0.077985   | 49.48721576 | 9.309643518 | Up | 0.000587 | 0.00091751 | -                                                                 |
| CCG017483.1 | 948  | 16  | 780 | 0.72522759 | 28.76313912 | 5.309643518 | Up | 7.09E-09 | 1.42E-08   | Putative salivary protein 34k-1 OS=Aedes albopictus PE=2 SV=1     |
| CCG014024.1 | 465  | 106 | 780 | 9.79525133 | 58.63969007 | 2.581723063 | Up | 0        | 0          | AAEL003469-PA OS=Aedes aegypti GN=AAEL003469 PE=4 SV=1            |
| CCG001404.1 | 1141 | 108 | 780 | 4.0672492  | 23.89785792 | 2.554756015 | Up | 0        | 0          | AAEL012040-PA OS=Aedes aegypti GN=AAEL012040 PE=4 SV=1            |
| CCG012661.1 | 1875 | 116 | 780 | 2.65839425 | 14.54264314 | 2.451662522 | Up | 1.16E-13 | 3.59E-13   | AAEL011220-PA OS=Aedes aegypti GN=AAEL011220 PE=4 SV=1            |
| CCG026268.1 | 2046 | 131 | 780 | 2.75123912 | 13.32720229 | 2.276220516 | Up | 1.26E-13 | 3.87E-13   | AAEL002973-PA OS=Aedes aegypti GN=AAEL002973 PE=4 SV=1            |
| CCG009962.1 | 4482 | 137 | 780 | 1.31344347 | 6.083769719 | 2.211611435 | Up | 2.90E-13 | 8.04E-13   | AAEL014774-PA OS=Aedes aegypti GN=AAEL014774 PE=4 SV=1            |
| CCG020799.1 | 1248 | 92  | 781 | 3.16764069 | 21.87693442 | 2.787929986 | Up | 1.44E-14 | 5.12E-14   | AAEL009474-PA OS=Aedes aegypti GN=PGRPS1 PE=4 SV=2                |
| CCG021986.1 | 1229 | 150 | 781 | 5.24447534 | 22.21514578 | 2.082673251 | Up | 0        | 0          | -                                                                 |
| CCG022071.1 | 4191 | 180 | 781 | 1.84551473 | 6.514534517 | 1.819638846 | Up | 3.32E-13 | 9.05E-13   | AAEL004895-PA OS=Aedes aegypti GN=AAEL004895 PE=4 SV=1            |

|             |      |      |     |            |             |              |      |          |          |                                                                                          |
|-------------|------|------|-----|------------|-------------|--------------|------|----------|----------|------------------------------------------------------------------------------------------|
| CCG006754.1 | 2457 | 262  | 781 | 4.58203926 | 11.11209367 | 1.27806894   | Up   | 0        | 0        | AAEL004551-PA OS=Aedes aegypti GN=AAEL004551 PE=4 SV=1                                   |
| CCG008934.1 | 6261 | 1362 | 781 | 9.34751294 | 4.360711413 | -1.100019046 | Down | 1.15E-67 | 5.67E-67 | AAEL011241-PA OS=Aedes aegypti GN=AAEL011241 PE=4 SV=1                                   |
| CCG006377.1 | 2781 | 96   | 782 | 1.48331338 | 9.830051218 | 2.7283755    | Up   | 0        | 0        | AAEL002496-PA OS=Aedes aegypti GN=AAEL002496 PE=4 SV=1                                   |
| CCG008661.1 | 737  | 102  | 782 | 5.94696463 | 37.09277128 | 2.640912659  | Up   | 0        | 0        | GH15970 OS=Drosophila grimshawi GN=GH15970 PE=4 SV=1                                     |
| CCG011667.1 | 2379 | 221  | 782 | 3.99172398 | 11.49111914 | 1.525435442  | Up   | 0        | 0        | AAEL005441-PA (Fragment) OS=Aedes aegypti GN=AAEL005441 PE=4 SV=1                        |
| CCG022502.1 | 1227 | 1554 | 782 | 54.4213265 | 22.27984714 | -1.288432787 | Down | 1.46E-98 | 7.71E-98 | AAEL000328-PA OS=Aedes aegypti GN=AAEL000328 PE=4 SV=1                                   |
| CCG007341.1 | 1740 | 21   | 783 | 0.51860025 | 15.73122455 | 4.922864278  | Up   | 1.76E-10 | 3.73E-10 | AAEL009057-PA OS=Aedes aegypti GN=AAEL009057 PE=3 SV=1                                   |
| CCG009362.1 | 2880 | 168  | 783 | 2.50656785 | 9.504281497 | 1.922864278  | Up   | 1.45E-13 | 4.33E-13 | Putative uncharacterized protein OS=Culex quinquefasciatus GN=CpipJ_CPIJ007254 PE=4 SV=1 |
| CCG002274.1 | 4755 | 244  | 783 | 2.2049664  | 5.756536427 | 1.384444364  | Up   | 2.78E-13 | 7.73E-13 | AAEL002818-PA OS=Aedes aegypti GN=AAEL002818 PE=4 SV=1                                   |
| CCG027131.1 | 1789 | 260  | 783 | 6.24490274 | 15.30035255 | 1.292813888  | Up   | 3.22E-13 | 8.81E-13 | AGAP002097-PA OS=Anopheles gambiae GN=AgaP_AGAP002097 PE=4 SV=5                          |
| CCG009662.1 | 1715 | 2693 | 783 | 67.4737582 | 15.96054269 | -2.079816813 | Down | 0        | 0        | AAEL010951-PA OS=Aedes aegypti GN=AAEL010951 PE=3 SV=1                                   |
| CCG024984.1 | 1476 | 55   | 784 | 1.60117575 | 18.56862398 | 3.535663334  | Up   | 0        | 0        | AAEL012260-PA OS=Aedes aegypti GN=AAEL012260 PE=4 SV=1                                   |
| CCG002651.1 | 1439 | 108  | 784 | 3.22496966 | 19.04606601 | 2.562135546  | Up   | 0        | 0        | AAEL011317-PA OS=Aedes aegypti GN=AAEL011317 PE=3 SV=1                                   |
| CCG003748.1 | 708  | 108  | 784 | 6.55470528 | 38.71086015 | 2.562135546  | Up   | 0        | 0        | AAEL011627-PA OS=Aedes aegypti GN=AAEL011627 PE=4 SV=1                                   |
| CCG018310.1 | 1227 | 283  | 784 | 9.91070489 | 22.33682884 | 1.172364805  | Up   | 0        | 0        | Discs overgrown protein kinase OS=Culex quinquefasciatus GN=CpipJ_CPIJ003503 PE=3 SV=1   |



|             |       |     |     |            |             |             |    |          |          |                                                                                 |
|-------------|-------|-----|-----|------------|-------------|-------------|----|----------|----------|---------------------------------------------------------------------------------|
| CCG013589.1 | 1479  | 38  | 785 | 1.10402293 | 18.55459585 | 4.070934534 | Up | 4.26E-14 | 1.45E-13 | AAEL012520-PA OS=Aedes aegypti GN=AAEL012520 PE=4 SV=1                          |
| CCG013154.1 | 1015  | 72  | 785 | 3.0480994  | 27.03669681 | 3.148937046 | Up | 0        | 0        | AAEL004482-PA OS=Aedes aegypti GN=AAEL004482 PE=4 SV=1                          |
| CCG017099.1 | 1788  | 214 | 785 | 5.14291007 | 15.34801301 | 1.577395061 | Up | 0        | 0        | AAEL006306-PA OS=Aedes aegypti GN=AAEL006306 PE=4 SV=1                          |
| CCG018709.1 | 2760  | 233 | 785 | 3.62751745 | 9.942843212 | 1.454675903 | Up | 0        | 0        | Paq OS=Culex quinquefasciatus GN=CpipJ_CPIJ018849 PE=4 SV=1                     |
| CCG024146.1 | 4818  | 270 | 785 | 2.40801751 | 5.695775688 | 1.242046451 | Up | 2.59E-13 | 7.26E-13 | AAEL001142-PA OS=Aedes aegypti GN=AAEL001142 PE=4 SV=1                          |
| CCG023212.1 | 1527  | 304 | 785 | 8.55455096 | 17.97134726 | 1.070934534 | Up | 0        | 0        | AAEL000415-PA OS=Aedes aegypti GN=AAEL000415 PE=4 SV=1                          |
| CCG020321.1 | 1343  | 28  | 786 | 0.89586937 | 20.45957226 | 4.513343784 | Up | 1.17E-12 | 2.85E-12 | AAEL011261-PA OS=Aedes aegypti GN=AAEL011261 PE=4 SV=1                          |
| CCG021944.1 | 1770  | 140 | 786 | 3.39873607 | 15.52384494 | 2.191415689 | Up | 0        | 0        | AAEL002427-PA OS=Aedes aegypti GN=AAEL002427 PE=4 SV=1                          |
| CCG021772.1 | 2040  | 215 | 786 | 4.52867301 | 13.4692184  | 1.572505856 | Up | 0        | 0        | AAEL000003-PA OS=Aedes aegypti GN=AAEL000003 PE=4 SV=1                          |
| CCG000071.1 | 1710  | 130 | 787 | 3.26670497 | 16.08898469 | 2.300165216 | Up | 0        | 0        | Zinc finger protein 569 OS=Culex quinquefasciatus GN=CpipJ_CPIJ020006 PE=4 SV=1 |
| CCG004783.1 | 1139  | 238 | 787 | 8.97875052 | 24.15466534 | 1.427715266 | Up | 6.86E-13 | 1.73E-12 | G73-specific cyclin-C OS=Culex quinquefasciatus GN=CpipJ_CPIJ006239 PE=3 SV=1   |
| CCG016288.1 | 1027  | 273 | 787 | 11.4223345 | 26.78886448 | 1.229775888 | Up | 1.53E-14 | 5.42E-14 | AAEL006570-PA OS=Aedes aegypti GN=AAEL006570 PE=4 SV=1                          |
| CCG005061.1 | 13465 | 302 | 787 | 0.96374748 | 2.043235338 | 1.08412829  | Up | 4.59E-13 | 1.20E-12 | Salivary purine nucleosidase OS=Aedes albopictus PE=2 SV=1                      |
| CCG023004.1 | 975   | 0   | 788 | 0.001      | 28.25345856 | 14.78613986 | Up | 4.44E-16 | 1.63E-15 | AAEL008137-PA OS=Aedes aegypti GN=AAEL008137 PE=4 SV=1                          |
| CCG000746.1 | 1563  | 77  | 788 | 2.11687112 | 17.6245183  | 3.057578483 | Up | 0        | 0        | AAEL010437-PA (Fragment) OS=Aedes aegypti GN=AAEL010437 PE=4 SV=1               |
| CCG022475.1 | 5124  | 218 | 788 | 1.8281425  | 5.376097209 | 1.556180698 | Up | 0        | 0        | Pol-like protein OS=Biomphalaria glabrata PE=4 SV=1                             |

|             |      |      |     |            |             |              |      |           |           |                                                                                          |
|-------------|------|------|-----|------------|-------------|--------------|------|-----------|-----------|------------------------------------------------------------------------------------------|
| CCG011411.1 | 777  | 229  | 788 | 12.6641818 | 35.45318159 | 1.485161235  | Up   | 2.46E-13  | 6.92E-13  | AAEL009634-PA OS=Aedes aegypti GN=AAEL009634 PE=3 SV=1                                   |
| CCG026021.1 | 1821 | 1482 | 788 | 34.9704265 | 15.12746958 | -1.208964709 | Down | 2.99E-85  | 1.54E-84  | AAEL003586-PA OS=Aedes aegypti GN=AAEL003586 PE=4 SV=1                                   |
| CCG023940.1 | 4203 | 1681 | 788 | 17.1858491 | 6.554157054 | -1.390738986 | Down | 1.27E-119 | 6.96E-119 | AAEL003933-PA OS=Aedes aegypti GN=DBLOX PE=4 SV=2                                        |
| CCG017480.1 | 3123 | 29   | 789 | 0.39901451 | 8.831918147 | 4.468213699  | Up   | 6.66E-13  | 1.69E-12  | AAEL014084-PA OS=Aedes aegypti GN=AAEL014084 PE=3 SV=1                                   |
| CCG009650.1 | 1150 | 261  | 789 | 9.75226151 | 23.98441772 | 1.298288697  | Up   | 8.02E-14  | 2.58E-13  | AAEL014548-PA (Fragment) OS=Aedes aegypti GN=TPX3 PE=4 SV=2                              |
| CCG022000.1 | 604  | 3128 | 789 | 222.532003 | 45.66569598 | -2.284830103 | Down | 0         | 0         | AAEL005538-PA OS=Aedes aegypti GN=AAEL005538 PE=4 SV=1                                   |
| CCG017153.1 | 1218 | 155  | 790 | 5.46823388 | 22.67408756 | 2.051897642  | Up   | 3.42E-13  | 9.27E-13  | AAEL012705-PA OS=Aedes aegypti GN=AAEL012705 PE=4 SV=1                                   |
| CCG011986.1 | 4266 | 162  | 790 | 1.63176207 | 6.473754958 | 1.988172044  | Up   | 0         | 0         | Condensin complex subunit 1 OS=Aedes aegypti GN=AAEL004634 PE=3 SV=1                     |
| CCG023380.1 | 1521 | 254  | 790 | 7.17574792 | 18.15715888 | 1.33933736   | Up   | 2.35E-13  | 6.67E-13  | AAEL011123-PA OS=Aedes aegypti GN=AAEL011123 PE=3 SV=1                                   |
| CCG017471.1 | 4897 | 270  | 790 | 2.36917058 | 5.639583143 | 1.25120645   | Up   | 2.59E-13  | 7.26E-13  | AAEL010940-PA (Fragment) OS=Aedes aegypti GN=AAEL010940 PE=4 SV=1                        |
| CCG017708.1 | 1161 | 29   | 791 | 1.07331809 | 23.81739615 | 4.471866093  | Up   | 6.66E-13  | 1.69E-12  | AAEL005819-PA OS=Aedes aegypti GN=AAEL005819 PE=4 SV=1                                   |
| CCG003752.1 | 7566 | 266  | 791 | 1.5106991  | 3.654770939 | 1.274564653  | Up   | 4.09E-14  | 1.40E-13  | Putative uncharacterized protein OS=Culex quinquefasciatus GN=CpipJ_CPIJ006312 PE=4 SV=1 |
| CCG008415.1 | 1902 | 30   | 792 | 0.67775607 | 14.55675878 | 4.424779228  | Up   | 3.71E-13  | 9.93E-13  | AAEL003088-PA OS=Aedes aegypti GN=AAEL003088 PE=4 SV=1                                   |
| CCG007415.1 | 2112 | 1864 | 792 | 37.9240461 | 13.10935379 | -1.532516321 | Down | 4.69E-153 | 2.67E-152 | AAEL011574-PA OS=Aedes aegypti GN=AAEL011574 PE=4 SV=1                                   |
| CCG013980.1 | 903  | 51   | 793 | 2.42686209 | 30.69979344 | 3.661064918  | Up   | 0         | 0         | AAEL010412-PA OS=Aedes aegypti GN=AAEL010412 PE=4 SV=1                                   |

|             |      |      |     |            |             |              |      |           |           |                                                                                                                   |
|-------------|------|------|-----|------------|-------------|--------------|------|-----------|-----------|-------------------------------------------------------------------------------------------------------------------|
| CCG017796.1 | 1038 | 98   | 793 | 4.05687282 | 26.70704574 | 2.718780415  | Up   | 0         | 0         | Nuclear receptor FTZ-F1 protein<br>OS=Aedes aegypti GN=FTZ-F1<br>PE=2 SV=1                                        |
| CCG023339.1 | 987  | 294  | 793 | 12.7994954 | 28.08704507 | 1.133817915  | Up   | 0         | 0         | AAEL005390-PA (Fragment)<br>OS=Aedes aegypti<br>GN=AAEL005390 PE=4 SV=1                                           |
| CCG009775.1 | 2475 | 3901 | 793 | 67.7272464 | 11.20077312 | -2.596138024 | Down | 0         | 0         | AAEL006749-PA OS=Aedes<br>aegypti GN=AAEL006749 PE=4<br>SV=1                                                      |
| CCG021295.1 | 1965 | 68   | 794 | 1.48699336 | 14.12563448 | 3.24784556   | Up   | 0         | 0         | AAEL007692-PA OS=Aedes<br>aegypti GN=AAEL007692 PE=4<br>SV=1                                                      |
| CCG025320.1 | 1003 | 101  | 794 | 4.32696231 | 27.67385021 | 2.677096918  | Up   | 0         | 0         | AAEL007038-PA OS=Aedes<br>aegypti GN=AAEL007038 PE=4<br>SV=1                                                      |
| CCG009360.1 | 1524 | 119  | 794 | 3.35524831 | 18.21317044 | 2.440490638  | Up   | 0         | 0         | AAEL008133-PA OS=Aedes<br>aegypti GN=AAEL008133 PE=4<br>SV=1                                                      |
| CCG016736.1 | 1642 | 147  | 794 | 3.84686418 | 16.90430679 | 2.135636056  | Up   | 7.02E-14  | 2.29E-13  | AAEL011059-PA OS=Aedes<br>aegypti GN=AAEL011059 PE=4<br>SV=1                                                      |
| CCG027417.1 | 797  | 284  | 794 | 15.3116746 | 34.82668978 | 1.185561281  | Up   | 0         | 0         | AAEL014368-PA OS=Aedes<br>aegypti GN=AAEL014368 PE=4<br>SV=1                                                      |
| CCG022628.1 | 4077 | 290  | 794 | 3.05646874 | 6.808160843 | 1.155399311  | Up   | 1.62E-13  | 4.77E-13  | AAEL001140-PA (Fragment)<br>OS=Aedes aegypti<br>GN=AAEL001140 PE=3 SV=1                                           |
| CCG027962.1 | 1359 | 142  | 795 | 4.48984718 | 20.45020606 | 2.187377134  | Up   | 2.62E-13  | 7.35E-13  | AAEL007277-PA (Fragment)<br>OS=Aedes aegypti<br>GN=AAEL007277 PE=4 SV=1                                           |
| CCG016763.1 | 1446 | 258  | 796 | 7.66679912 | 19.24397532 | 1.327710569  | Up   | 1.69E-13  | 4.97E-13  | -                                                                                                                 |
| CCG004193.1 | 1197 | 2191 | 796 | 78.6522043 | 23.24710803 | -1.758435945 | Down | 8.65E-219 | 5.22E-218 | Acetyl-CoA acetyltransferase<br>OS=Aedes aegypti PE=2 SV=1                                                        |
| CCG011597.1 | 845  | 69   | 797 | 3.50877123 | 32.97248117 | 3.232224661  | Up   | 0         | 0         | AAEL002108-PA OS=Aedes<br>aegypti GN=AAEL002108 PE=4<br>SV=1                                                      |
| CCG028505.1 | 3889 | 86   | 797 | 0.95021784 | 7.16424443  | 2.914484363  | Up   | 0         | 0         | DNA polymerase subunit gamma<br>1, mitochondrial OS=Culex<br>quinquefasciatus<br>GN=CpipJ_CPIJ012266 PE=3<br>SV=1 |
| CCG028617.1 | 2037 | 127  | 797 | 2.67901635 | 13.67783338 | 2.352064431  | Up   | 1.57E-13  | 4.66E-13  | AAEL001455-PA OS=Aedes<br>aegypti GN=AAEL001455 PE=4<br>SV=1                                                      |

|             |      |      |     |            |             |              |      |          |            |                                                                   |
|-------------|------|------|-----|------------|-------------|--------------|------|----------|------------|-------------------------------------------------------------------|
| CCG004368.1 | 702  | 147  | 797 | 8.99793588 | 39.6890977  | 2.141076773  | Up   | 7.02E-14 | 2.29E-13   | AAEL009116-PA OS=Aedes aegypti GN=AAEL009116 PE=4 SV=1            |
| CCG005524.1 | 2589 | 164  | 797 | 2.72191444 | 10.76158617 | 1.983197113  | Up   | 1.14E-13 | 3.54E-13   | AAEL000922-PA OS=Aedes aegypti GN=AAEL000922 PE=4 SV=1            |
| CCG016703.1 | 1264 | 172  | 797 | 5.84714743 | 22.04252103 | 1.914484363  | Up   | 1.35E-13 | 4.09E-13   | AAEL009222-PA OS=Aedes aegypti GN=AAEL009222 PE=4 SV=1            |
| CCG001049.1 | 1362 | 0    | 798 | 0.001      | 20.48216216 | 14.3220804   | Up   | 4.44E-16 | 1.64E-15   | AAEL009018-PA OS=Aedes aegypti GN=AAEL009018 PE=3 SV=1            |
| CCG005672.2 | 1698 | 137  | 798 | 3.46693383 | 16.42915481 | 2.244526057  | Up   | 2.90E-13 | 8.04E-13   | AAEL011982-PA OS=Aedes aegypti GN=AAEL011982 PE=4 SV=1            |
| CCG002244.1 | 1614 | 237  | 798 | 6.30968222 | 17.28420376 | 1.453814891  | Up   | 2.32E-13 | 6.62E-13   | AAEL004530-PA OS=Aedes aegypti GN=AAEL004530 PE=4 SV=1            |
| CCG020733.1 | 6117 | 1513 | 798 | 10.6282832 | 4.560520658 | -1.220638132 | Down | 2.63E-88 | 1.36E-87   | AAEL000656-PA OS=Aedes aegypti GN=AAEL000656 PE=4 SV=1            |
| CCG013072.1 | 845  | 31   | 799 | 1.57640447 | 33.05522265 | 4.390168586  | Up   | 2.40E-13 | 6.77E-13   | AAEL009836-PA OS=Aedes aegypti GN=AAEL009836 PE=4 SV=1            |
| CCG016293.1 | 1428 | 73   | 799 | 2.19663209 | 19.55998819 | 3.154540338  | Up   | 0        | 0          | AAEL001111-PA OS=Aedes aegypti GN=AAEL001111 PE=4 SV=1            |
| CCG003659.1 | 1776 | 143  | 799 | 3.45983787 | 15.7272878  | 2.18449356   | Up   | 0        | 0          | AAEL008947-PA (Fragment) OS=Aedes aegypti GN=AAEL008947 PE=4 SV=1 |
| CCG027168.1 | 1607 | 198  | 799 | 5.29434191 | 17.38124651 | 1.715008277  | Up   | 0        | 0          | AAEL013902-PA OS=Aedes aegypti GN=AAEL013902 PE=4 SV=1            |
| CCG018391.1 | 777  | 2    | 800 | 0.11060421 | 35.99307776 | 8.346169394  | Up   | 9.36E-05 | 0.00015349 | -                                                                 |
| CCG024391.1 | 1128 | 131  | 800 | 4.99027946 | 24.79310409 | 2.312746392  | Up   | 1.26E-13 | 3.87E-13   | AAEL003385-PA OS=Aedes aegypti GN=AAEL003385 PE=4 SV=1            |
| CCG003609.1 | 897  | 133  | 800 | 6.37120926 | 31.1779503  | 2.290886958  | Up   | 9.90E-14 | 3.11E-13   | AAEL012673-PA OS=Aedes aegypti GN=AAEL012673 PE=4 SV=1            |
| CCG017712.1 | 1875 | 206  | 800 | 4.72094151 | 14.91553142 | 1.659668866  | Up   | 1.10E-13 | 3.44E-13   | AAEL005140-PA OS=Aedes aegypti GN=AAEL005140 PE=4 SV=1            |
| CCG004601.1 | 1536 | 37   | 801 | 1.03507824 | 18.23019511 | 4.138518271  | Up   | 5.17E-14 | 1.74E-13   | AAEL010501-PA OS=Aedes aegypti GN=AAEL010501 PE=4 SV=1            |

|             |      |      |     |            |             |              |      |           |           |                                                                                                   |
|-------------|------|------|-----|------------|-------------|--------------|------|-----------|-----------|---------------------------------------------------------------------------------------------------|
| CCG007442.1 | 855  | 63   | 801 | 3.16619097 | 32.75038561 | 3.370691713  | Up   | 0         | 0         | male-specific transcription factor FRU-MA OS=Culex quinquefasciatus GN=CpipJ_CPIJ010851 PE=4 SV=1 |
| CCG022621.1 | 3135 | 160  | 801 | 2.19303271 | 8.931923348 | 2.026043541  | Up   | 4.24E-14  | 1.45E-13  | AAEL005806-PA (Fragment) OS=Aedes aegypti GN=AAEL005806 PE=4 SV=1                                 |
| CCG000601.1 | 1074 | 178  | 801 | 7.12161337 | 26.07223435 | 1.872238205  | Up   | 1.15E-13  | 3.57E-13  | AAEL001449-PA OS=Aedes aegypti GN=AAEL001449 PE=4 SV=1                                            |
| CCG015974.1 | 1221 | 1582 | 801 | 55.6741361 | 22.9333167  | -1.279562248 | Down | 3.05E-99  | 1.61E-98  | AGAP003014-PA OS=Anopheles gambiae GN=AgaP_AGAP003014 PE=4 SV=4                                   |
| CCG017826.1 | 576  | 1892 | 801 | 141.143642 | 48.61385364 | -1.537724737 | Down | 4.23E-156 | 2.42E-155 | AAEL009257-PA OS=Aedes aegypti GN=AAEL009257 PE=4 SV=1                                            |
| CCG023568.1 | 2619 | 30   | 802 | 0.49220773 | 10.70505459 | 4.442881035  | Up   | 3.71E-13  | 9.94E-13  | AAEL013025-PA OS=Aedes aegypti GN=AAEL013025 PE=4 SV=1                                            |
| CCG002104.1 | 2616 | 55   | 802 | 0.90341567 | 10.71733103 | 3.568411917  | Up   | 0         | 0         | AAEL003153-PA OS=Aedes aegypti GN=AAEL003153 PE=4 SV=1                                            |
| CCG025956.1 | 3430 | 281  | 802 | 3.52026106 | 8.173917776 | 1.21534531   | Up   | 0         | 0         | Na-K-Cl cotransporter OS=Aedes aegypti PE=2 SV=1                                                  |
| CCG011231.2 | 1458 | 69   | 803 | 2.03354711 | 19.25342678 | 3.243044925  | Up   | 0         | 0         | AAEL015034-PA OS=Aedes aegypti GN=AAEL015034 PE=4 SV=1                                            |
| CCG010441.1 | 1287 | 92   | 803 | 3.07165158 | 21.8115744  | 2.828007425  | Up   | 1.44E-14  | 5.12E-14  | AAEL007594-PA OS=Aedes aegypti GN=AAEL007594 PE=3 SV=1                                            |
| CCG014371.1 | 769  | 305  | 803 | 17.0426126 | 36.50389629 | 1.098903949  | Up   | 5.30E-13  | 1.37E-12  | AAEL011737-PA OS=Aedes aegypti GN=AAEL011737 PE=4 SV=1                                            |
| CCG021478.1 | 741  | 87   | 804 | 5.04502957 | 37.93043796 | 2.910421399  | Up   | 0         | 0         | AAEL012372-PA OS=Aedes aegypti GN=AAEL012372 PE=4 SV=1                                            |
| CCG016699.1 | 1020 | 226  | 804 | 9.52074512 | 27.55534757 | 1.533185933  | Up   | 2.04E-14  | 7.16E-14  | AAEL009225-PA OS=Aedes aegypti GN=AAEL009225 PE=4 SV=1                                            |
| CCG005882.1 | 1119 | 1929 | 804 | 74.0738321 | 25.117475   | -1.560272533 | Down | 1.53E-162 | 8.80E-162 | AAEL012098-PA (Fragment) OS=Aedes aegypti GN=AAEL012098 PE=4 SV=1                                 |

|             |      |      |     |            |             |              |      |           |            |                                                                                                   |
|-------------|------|------|-----|------------|-------------|--------------|------|-----------|------------|---------------------------------------------------------------------------------------------------|
| CCG015923.1 | 2478 | 91   | 805 | 1.5779846  | 11.35650234 | 2.847363537  | Up   | 0         | 0          | Putative uncharacterized protein<br>OS=Culex quinquefasciatus<br>GN=CpipJ_CPIJ005532 PE=4<br>SV=1 |
| CCG011701.1 | 1116 | 124  | 805 | 4.77441496 | 25.21631971 | 2.400961866  | Up   | 1.61E-13  | 4.77E-13   | Transcription factor 11B OS=Culex<br>quinquefasciatus<br>GN=CpipJ_CPIJ011738 PE=4<br>SV=1         |
| CCG019519.1 | 1950 | 170  | 805 | 3.74607943 | 14.43149374 | 1.945767241  | Up   | 3.53E-13  | 9.52E-13   | AAEL008037-PA OS=Aedes<br>aegypti GN=AAEL008037 PE=3<br>SV=1                                      |
| CCG015871.1 | 474  | 2703 | 805 | 245.036271 | 59.3700692  | -2.04518762  | Down | 0         | 0          | AAEL007135-PA OS=Aedes<br>aegypti GN=AAEL007135 PE=4<br>SV=1                                      |
| CCG023685.1 | 2163 | 2854 | 805 | 56.6970054 | 13.01036191 | -2.123611443 | Down | 0         | 0          | AAEL012552-PA OS=Aedes<br>aegypti GN=AAEL012552 PE=4<br>SV=1                                      |
| CCG018163.1 | 2730 | 53   | 806 | 0.83421096 | 10.32101505 | 3.629028778  | Up   | 0         | 0          | Putative uncharacterized protein<br>OS=Culex quinquefasciatus<br>GN=CpipJ_CPIJ009453 PE=4<br>SV=1 |
| CCG017010.1 | 660  | 135  | 806 | 8.7892639  | 42.69147133 | 2.280133635  | Up   | 1.90E-13  | 5.48E-13   | Probable ER retained protein<br>OS=Aedes aegypti PE=2 SV=1                                        |
| CCG013478.1 | 1474 | 172  | 806 | 5.01410743 | 19.11558418 | 1.930684478  | Up   | 1.35E-13  | 4.09E-13   | AAEL014705-PA OS=Aedes<br>aegypti GN=AAEL014705 PE=4<br>SV=1                                      |
| CCG010283.1 | 4610 | 1994 | 806 | 18.5860414 | 6.11201108  | -1.604500462 | Down | 6.38E-175 | 3.72E-174  | AAEL002683-PA OS=Aedes<br>aegypti GN=AAEL002683 PE=4<br>SV=1                                      |
| CCG019008.1 | 2196 | 84   | 807 | 1.64365105 | 12.84668914 | 2.966420644  | Up   | 0         | 0          | AAEL004387-PA OS=Aedes<br>aegypti GN=AAEL004387 PE=4<br>SV=1                                      |
| CCG009339.1 | 1719 | 187  | 807 | 4.67442721 | 16.41147723 | 1.811843607  | Up   | 3.31E-13  | 9.04E-13   | AAEL003101-PA OS=Aedes<br>aegypti GN=AAEL003101 PE=4<br>SV=1                                      |
| CCG025934.1 | 822  | 3524 | 807 | 184.215748 | 34.32035201 | -2.424260142 | Down | 0         | 0          | AAEL004081-PA OS=Aedes<br>aegypti GN=AAEL004081 PE=4<br>SV=1                                      |
| CCG000380.1 | 1176 | 2    | 808 | 0.07307778 | 24.01895207 | 8.360524687  | Up   | 9.36E-05  | 0.00015339 | AAEL005606-PA OS=Aedes<br>aegypti GN=AAEL005606 PE=4<br>SV=1                                      |
| CCG026773.1 | 870  | 82   | 808 | 4.05002096 | 32.46699728 | 3.002972682  | Up   | 0         | 0          | AAEL010747-PA OS=Aedes<br>aegypti GN=AAEL010747 PE=4<br>SV=1                                      |
| CCG022360.1 | 786  | 83   | 808 | 4.5375165  | 35.93675271 | 2.985485255  | Up   | 1.32E-13  | 4.02E-13   | Putative uncharacterized protein<br>OS=Culex quinquefasciatus<br>GN=CpipJ_CPIJ009358 PE=4<br>SV=1 |

|             |       |      |     |            |             |              |      |           |           |                                                                                          |
|-------------|-------|------|-----|------------|-------------|--------------|------|-----------|-----------|------------------------------------------------------------------------------------------|
| CCG002018.1 | 2009  | 114  | 808 | 2.43830251 | 14.05987438 | 2.527634672  | Up   | 8.48E-14  | 2.70E-13  | AAEL010816-PA OS=Aedes aegypti GN=AAEL010816 PE=3 SV=1                                   |
| CCG025936.1 | 1625  | 1342 | 808 | 35.4863901 | 17.38233085 | -1.02964427  | Down | 5.09E-60  | 2.45E-59  | AAEL006186-PA OS=Aedes aegypti GN=AAEL006186 PE=4 SV=1                                   |
| CCG010040.1 | 627   | 71   | 809 | 4.86579132 | 45.10565536 | 3.212561977  | Up   | 0         | 0         | AAEL000604-PA OS=Aedes aegypti GN=AAEL000604 PE=4 SV=1                                   |
| CCG025664.1 | 1341  | 176  | 809 | 5.6395774  | 21.08966884 | 1.902877478  | Up   | 0         | 0         | AAEL012081-PA OS=Aedes aegypti GN=AAEL012081 PE=4 SV=1                                   |
| CCG016967.1 | 1292  | 136  | 810 | 4.52312996 | 21.91656671 | 2.27662846   | Up   | 1.70E-13  | 4.98E-13  | AAEL006788-PA (Fragment) OS=Aedes aegypti GN=AAEL006788 PE=2 SV=1                        |
| CCG009692.1 | 1632  | 193  | 810 | 5.08159239 | 17.35061531 | 1.771634264  | Up   | 6.08E-14  | 2.02E-13  | AAEL001705-PA OS=Aedes aegypti GN=AAEL001705 PE=4 SV=1                                   |
| CCG026762.1 | 1275  | 194  | 810 | 6.53814001 | 22.2087876  | 1.764178459  | Up   | 5.97E-13  | 1.53E-12  | AAEL005717-PA OS=Aedes aegypti GN=AAEL005717 PE=4 SV=1                                   |
| CCG028572.1 | 1166  | 207  | 810 | 7.62841772 | 24.28490925 | 1.670604344  | Up   | 6.88E-15  | 2.47E-14  | AAEL006458-PA OS=Aedes aegypti GN=AAEL006458 PE=3 SV=1                                   |
| CCG009950.1 | 1044  | 306  | 810 | 12.5945774 | 27.12280094 | 1.106703459  | Up   | 0         | 0         | AAEL000055-PA OS=Aedes aegypti GN=AAEL000055 PE=4 SV=1                                   |
| CCG024565.2 | 3003  | 326  | 810 | 4.66471311 | 9.429305423 | 1.015363147  | Up   | 6.17E-13  | 1.58E-12  | Aldehyde dehydrogenase OS=Aedes aegypti GN=AAEL012162 PE=3 SV=1                          |
| CCG023261.1 | 297   | 2810 | 810 | 406.548668 | 95.34075483 | -2.092263114 | Down | 0         | 0         | Putative uncharacterized protein OS=Culex quinquefasciatus GN=CpipJ_CPIJ002897 PE=3 SV=1 |
| CCG001922.1 | 3958  | 99   | 811 | 1.07478619 | 7.163002138 | 2.736514688  | Up   | 0         | 0         | AAEL001554-PA OS=Aedes aegypti GN=AAEL001554 PE=4 SV=1                                   |
| CCG014483.1 | 429   | 139  | 811 | 13.9225947 | 66.08662579 | 2.246930235  | Up   | 1.46E-13  | 4.37E-13  | AAEL012955-PA OS=Aedes aegypti GN=AAEL012955 PE=4 SV=1                                   |
| CCG003849.1 | 27472 | 2583 | 811 | 4.04014358 | 1.032002128 | -1.96896062  | Down | 9.64E-301 | 6.09E-300 | AAEL012764-PA OS=Aedes aegypti GN=AAEL012764 PE=3 SV=1                                   |
| CCG016614.1 | 1318  | 98   | 813 | 3.1950182  | 21.56379288 | 2.754714902  | Up   | 0         | 0         | AAEL006033-PA OS=Aedes aegypti GN=AAEL006033 PE=4 SV=1                                   |
| CCG010343.1 | 1133  | 201  | 813 | 7.62305089 | 25.08480054 | 1.718373055  | Up   | 0         | 0         | AAEL003844-PA OS=Aedes aegypti GN=GALE5 PE=4 SV=1                                        |

|             |       |      |     |            |             |              |      |           |           |                                                                                |
|-------------|-------|------|-----|------------|-------------|--------------|------|-----------|-----------|--------------------------------------------------------------------------------|
| CCG007156.1 | 1743  | 31   | 814 | 0.7642351  | 16.32589632 | 4.417001878  | Up   | 2.40E-13  | 6.77E-13  | AAEL011085-PA OS=Aedes aegypti GN=AAEL011085 PE=4 SV=1                         |
| CCG000585.1 | 915   | 134  | 814 | 6.29283545 | 31.09949431 | 2.305108998  | Up   | 0         | 0         | AAEL006516-PA OS=Aedes aegypti GN=AAEL006516 PE=4 SV=1                         |
| CCG019430.1 | 1395  | 222  | 814 | 6.83819433 | 20.39859304 | 1.576782322  | Up   | 0         | 0         | AAEL005395-PA OS=Aedes aegypti GN=AAEL005395 PE=4 SV=1                         |
| CCG005682.1 | 384   | 292  | 814 | 32.6749024 | 74.10426378 | 1.181373629  | Up   | 0         | 0         | -                                                                              |
| CCG025255.1 | 1521  | 62   | 815 | 1.75156052 | 18.73175251 | 3.418773143  | Up   | 0         | 0         | AAEL007468-PA OS=Aedes aegypti GN=AAEL007468 PE=4 SV=1                         |
| CCG006888.1 | 2037  | 64   | 815 | 1.35005548 | 13.98674304 | 3.372969453  | Up   | 0         | 0         | AAEL001455-PA OS=Aedes aegypti GN=AAEL001455 PE=4 SV=1                         |
| CCG020185.1 | 2103  | 287  | 815 | 5.86415304 | 13.54778677 | 1.208062526  | Up   | 2.87E-13  | 7.98E-13  | AAEL001331-PA OS=Aedes aegypti GN=AAEL001331 PE=2 SV=1                         |
| CCG018554.3 | 1450  | 9227 | 815 | 273.435684 | 19.64896246 | -3.798676488 | Down | 0         | 0         | Hypothetical conserved protein OS=Glossina morsitans morsitans PE=2 SV=1       |
| CCG024897.1 | 1353  | 168  | 816 | 5.33548811 | 21.083484   | 1.982421123  | Up   | 1.45E-13  | 4.33E-13  | AAEL010491-PB OS=Aedes aegypti GN=AAEL010491 PE=4 SV=1                         |
| CCG003824.3 | 1773  | 291  | 816 | 7.0525622  | 16.08908846 | 1.189863203  | Up   | 6.00E-14  | 2.00E-13  | AAEL001133-PA OS=Aedes aegypti GN=AAEL001133 PE=4 SV=1                         |
| CCG017793.1 | 30970 | 2307 | 816 | 3.20087755 | 0.921083431 | -1.797063743 | Down | 2.36E-237 | 1.44E-236 | AAEL002049-PB (Fragment) OS=Aedes aegypti GN=AAEL002049 PE=4 SV=1              |
| CCG020758.1 | 738   | 0    | 817 | 0.001      | 38.70042293 | 15.24006171  | Up   | 4.44E-16  | 1.65E-15  | Serine 5-dehydrogenase OS=Culex quinquefasciatus GN=CpipJ_CPIJ016922 PE=3 SV=1 |
| CCG022874.1 | 1711  | 219  | 817 | 5.49992512 | 16.69252608 | 1.601718412  | Up   | 4.32E-13  | 1.14E-12  | -                                                                              |
| CCG025649.1 | 669   | 138  | 818 | 8.86371207 | 42.7442009  | 2.26974578   | Up   | 1.49E-13  | 4.45E-13  | AAEL002371-PA OS=Aedes aegypti GN=AAEL002371 PE=4 SV=1                         |
| CCG027418.1 | 1953  | 175  | 818 | 3.85033464 | 14.64202273 | 1.927059125  | Up   | 3.55E-13  | 9.58E-13  | AAEL012420-PA OS=Aedes aegypti GN=AAEL012420 PE=4 SV=1                         |
| CCG025225.1 | 1317  | 180  | 818 | 5.87285667 | 21.71288565 | 1.88641714   | Up   | 3.32E-13  | 9.06E-13  | AGAP013320-PA OS=Anopheles gambiae GN=AgaP_AGAP013320 PE=4 SV=1                |



|             |      |      |     |            |             |              |      |           |           |                                                                                          |
|-------------|------|------|-----|------------|-------------|--------------|------|-----------|-----------|------------------------------------------------------------------------------------------|
| CCG022589.1 | 5781 | 188  | 818 | 1.39738974 | 4.946526622 | 1.823681385  | Up   | 1.80E-13  | 5.24E-13  | AAEL002786-PA OS=Aedes aegypti GN=AAEL002786 PE=4 SV=1                                   |
| CCG021037.1 | 1510 | 1611 | 818 | 45.8438692 | 18.93766252 | -1.275470542 | Down | 1.58E-100 | 8.36E-100 | AAEL008569-PA OS=Aedes aegypti GN=AAEL008569 PE=4 SV=1                                   |
| CCG015170.1 | 1912 | 3220 | 818 | 72.365348  | 14.95599916 | -2.274574736 | Down | 0         | 0         | AAEL003434-PA OS=Aedes aegypti GN=AAEL003434 PE=4 SV=1                                   |
| CCG014139.1 | 3978 | 95   | 819 | 1.02617516 | 7.197292277 | 2.810177237  | Up   | 0         | 0         | AGAP007129-PA OS=Anopheles gambiae GN=AGAP007129 PE=4 SV=4                               |
| CCG000707.2 | 1686 | 123  | 819 | 3.1348027  | 16.98151167 | 2.43751834   | Up   | 0         | 0         | AAEL003146-PA OS=Aedes aegypti GN=AAEL003146 PE=4 SV=1                                   |
| CCG026674.1 | 501  | 309  | 819 | 26.5022914 | 57.14736263 | 1.108569818  | Up   | 6.25E-13  | 1.59E-12  | AAEL008924-PA OS=Aedes aegypti GN=AAEL008924 PE=4 SV=1                                   |
| CCG006634.1 | 541  | 23   | 820 | 1.82680942 | 52.9866672  | 4.858231347  | Up   | 4.01E-11  | 8.67E-11  | AAEL008511-PA OS=Aedes aegypti GN=AAEL008511 PE=4 SV=1                                   |
| CCG012058.1 | 2293 | 170  | 820 | 3.18571953 | 12.50143347 | 1.972402367  | Up   | 3.53E-13  | 9.52E-13  | AAEL001250-PA OS=Aedes aegypti GN=AAEL001250 PE=4 SV=1                                   |
| CCG000209.1 | 1299 | 34   | 821 | 1.12468897 | 22.09449209 | 4.296088774  | Up   | 8.82E-14  | 2.79E-13  | Putative uncharacterized protein OS=Culex quinquefasciatus GN=CpipJ_CPIJ009013 PE=4 SV=1 |
| CCG019082.1 | 2191 | 181  | 821 | 3.549759   | 13.09938167 | 1.883705729  | Up   | 1.53E-13  | 4.55E-13  | AAEL014321-PA OS=Aedes aegypti GN=AAEL014321 PE=4 SV=1                                   |
| CCG026620.1 | 2809 | 270  | 821 | 4.13023437 | 10.21742443 | 1.306736019  | Up   | 2.59E-13  | 7.26E-13  | AAEL004756-PA OS=Aedes aegypti GN=AAEL004756 PE=4 SV=1                                   |
| CCG003485.1 | 687  | 277  | 821 | 17.3254971 | 41.77692173 | 1.26980945   | Up   | 0         | 0         | AAEL004071-PA OS=Aedes aegypti GN=AAEL004071 PE=4 SV=1                                   |
| CCG028417.1 | 2235 | 1741 | 821 | 33.4721736 | 12.84149675 | -1.382148872 | Down | 1.15E-122 | 6.30E-122 | NADP+-dependent farnesol dehydrogenase 1 OS=Aedes aegypti GN=FOHSDR-1 PE=2 SV=1          |
| CCG010052.1 | 1227 | 2800 | 821 | 98.0564441 | 23.39099041 | -2.067659496 | Down | 0         | 0         | AAEL003430-PA OS=Aedes aegypti GN=AAEL003430 PE=4 SV=1                                   |

|             |      |      |     |            |             |              |      |           |           |                                                                                                            |
|-------------|------|------|-----|------------|-------------|--------------|------|-----------|-----------|------------------------------------------------------------------------------------------------------------|
| CCG023139.1 | 2260 | 98   | 822 | 1.86328938 | 12.71491306 | 2.770597943  | Up   | 0         | 0         | Gastrin zinc finger protein<br>XLCGF8.2DB OS=Culex<br>quinquefasciatus<br>GN=CpipJ_CPIJ012331 PE=4<br>SV=1 |
| CCG028060.1 | 2392 | 129  | 822 | 2.31734773 | 12.01325397 | 2.374080532  | Up   | 0         | 0         | AAEL007488-PA OS=Aedes<br>aegypti GN=AAEL007488 PE=4<br>SV=1                                               |
| CCG018016.1 | 1132 | 204  | 822 | 7.74366242 | 25.38489709 | 1.712882446  | Up   | 6.59E-14  | 2.17E-13  | AAEL001366-PA OS=Aedes<br>aegypti GN=AAEL001366 PE=4<br>SV=1                                               |
| CCG011887.1 | 897  | 76   | 823 | 3.640691   | 32.07431637 | 3.139134311  | Up   | 0         | 0         | AAEL008621-PA OS=Aedes<br>aegypti GN=AAEL008621 PE=4<br>SV=1                                               |
| CCG018874.1 | 2930 | 316  | 823 | 4.63427855 | 9.819338493 | 1.083281076  | Up   | 3.23E-13  | 8.83E-13  | AAEL006207-PA OS=Aedes<br>aegypti GN=AAEL006207 PE=4<br>SV=1                                               |
| CCG016835.2 | 357  | 1846 | 823 | 222.190841 | 80.59008903 | -1.463125013 | Down | 1.49E-141 | 8.40E-141 | AAEL001864-PA OS=Aedes<br>aegypti GN=4EBP PE=4 SV=1                                                        |
| CCG023190.1 | 4903 | 2578 | 823 | 22.5935092 | 5.867970994 | -1.944974724 | Down | 2.85E-295 | 1.79E-294 | SLC4-like anion exchanger<br>OS=Aedes aegypti PE=2 SV=1                                                    |
| CCG016576.1 | 2442 | 58   | 824 | 1.02057519 | 11.79591321 | 3.530832736  | Up   | 0         | 0         | AAEL010080-PA OS=Aedes<br>aegypti GN=AAEL010080 PE=4<br>SV=1                                               |
| CCG021555.1 | 1815 | 66   | 824 | 1.5625358  | 15.87086505 | 3.344419612  | Up   | 0         | 0         | AAEL008320-PA OS=Aedes<br>aegypti GN=AAEL008320 PE=4<br>SV=1                                               |
| CCG002001.1 | 1972 | 77   | 824 | 1.67782432 | 14.6073124  | 3.12202719   | Up   | 0         | 0         | AAEL000385-PA OS=Aedes<br>aegypti GN=AAEL000385 PE=4<br>SV=1                                               |
| CCG025578.1 | 1425 | 149  | 824 | 4.49297576 | 20.21447022 | 2.169645211  | Up   | 2.33E-13  | 6.63E-13  | AAEL011214-PA OS=Aedes<br>aegypti GN=AAEL011214 PE=4<br>SV=1                                               |
| CCG003479.1 | 2226 | 83   | 825 | 1.60219585 | 12.95623465 | 3.015524082  | Up   | 1.32E-13  | 4.01E-13  | AAEL013014-PA OS=Aedes<br>aegypti GN=AAEL013014 PE=4<br>SV=1                                               |
| CCG004760.1 | 3268 | 1630 | 825 | 21.4322728 | 8.82514637  | -1.280092736 | Down | 2.92E-102 | 1.55E-101 | AAEL006436-PA OS=Aedes<br>aegypti GN=AAEL006436 PE=4<br>SV=1                                               |
| CCG004279.1 | 2739 | 3276 | 825 | 51.3942499 | 10.52960144 | -2.287156129 | Down | 0         | 0         | Integrin beta OS=Aedes aegypti<br>GN=AAEL012466 PE=3 SV=1                                                  |
| CCG001913.1 | 1316 | 87   | 826 | 2.84070434 | 21.94189712 | 2.949367679  | Up   | 0         | 0         | AAEL004371-PA (Fragment)<br>OS=Aedes aegypti<br>GN=AAEL004371 PE=4 SV=1                                    |
| CCG020944.1 | 1587 | 163  | 826 | 4.41340059 | 18.19504513 | 2.043583021  | Up   | 1.80E-13  | 5.25E-13  | AAEL001365-PA OS=Aedes<br>aegypti GN=AAEL001365 PE=3<br>SV=1                                               |

|             |       |      |     |            |             |              |      |           |           |                                                                                                     |
|-------------|-------|------|-----|------------|-------------|--------------|------|-----------|-----------|-----------------------------------------------------------------------------------------------------|
| CCG018682.1 | 372   | 200  | 826 | 23.1020079 | 77.62241025 | 1.748454985  | Up   | 0         | 0         | AAEL004835-PA OS=Aedes aegypti GN=AAEL004835 PE=4 SV=1                                              |
| CCG004260.1 | 745   | 230  | 826 | 13.2658241 | 38.75910955 | 1.546821124  | Up   | 3.85E-13  | 1.03E-12  | Putative uncharacterized protein OS=Culex quinquefasciatus GN=CpipJ_CPIJ018772 PE=4 SV=1            |
| CCG025216.1 | 1062  | 270  | 826 | 10.9245088 | 27.18977082 | 1.315495578  | Up   | 2.59E-13  | 7.27E-13  | AAEL005825-PA OS=Aedes aegypti GN=AAEL005825 PE=2 SV=1                                              |
| CCG016965.1 | 3864  | 2673 | 827 | 29.7251813 | 7.482012135 | -1.990187399 | Down | 0         | 0         | AAEL006791-PA OS=Aedes aegypti GN=AAEL006791 PE=4 SV=1                                              |
| CCG016076.1 | 639   | 46   | 828 | 3.09328293 | 45.29804878 | 3.872238205  | Up   | 3.40E-14  | 1.18E-13  | AAEL000081-PA (Fragment) OS=Aedes aegypti GN=AAEL000081 PE=3 SV=1                                   |
| CCG025507.1 | 644   | 187  | 828 | 12.4772366 | 44.94635585 | 1.848905701  | Up   | 3.31E-13  | 9.04E-13  | Salivary purine nucleosidase OS=Aedes albopictus PE=2 SV=1                                          |
| CCG005989.1 | 1888  | 281  | 828 | 6.39538953 | 15.33127816 | 1.261373841  | Up   | 0         | 0         | AAEL009412-PA OS=Aedes aegypti GN=AAEL009412 PE=4 SV=1                                              |
| CCG015544.1 | 1319  | 26   | 829 | 0.84701524 | 21.97150223 | 4.697101777  | Up   | 4.60E-12  | 1.05E-11  | AAEL000661-PA OS=Aedes aegypti GN=AAEL000661 PE=4 SV=1                                              |
| CCG015138.1 | 1629  | 133  | 829 | 3.50827176 | 17.79030782 | 2.34225906   | Up   | 9.90E-14  | 3.11E-13  | C47D6 small nuclear ribonucleoprotein Prp31 OS=Culex quinquefasciatus GN=CpipJ_CPIJ002179 PE=4 SV=1 |
| CCG018462.1 | 46064 | 1799 | 829 | 1.67815545 | 0.629133628 | -1.415437976 | Down | 2.54E-131 | 1.41E-130 | AAEL009685-PA OS=Aedes aegypti GN=AAEL009685 PE=3 SV=1                                              |
| CCG023164.1 | 786   | 66   | 830 | 3.60814565 | 36.91522865 | 3.354886611  | Up   | 0         | 0         | AAEL008772-PA OS=Aedes aegypti GN=AAEL008772 PE=4 SV=1                                              |
| CCG005244.1 | 1285  | 194  | 830 | 6.48725954 | 22.58005426 | 1.799367888  | Up   | 5.97E-13  | 1.53E-12  | AAEL001945-PA OS=Aedes aegypti GN=AAEL001945 PE=4 SV=1                                              |
| CCG023723.1 | 1657  | 49   | 831 | 1.27068014 | 17.53188171 | 3.786308026  | Up   | 0         | 0         | Pipsqueak protein OS=Drosophila melanogaster GN=psq PE=4 SV=1                                       |
| CCG021435.1 | 2848  | 201  | 831 | 3.03262523 | 10.20025562 | 1.749966179  | Up   | 0         | 0         | Putative uncharacterized protein OS=Culex quinquefasciatus GN=CpipJ_CPIJ016357 PE=4 SV=1            |
| CCG008208.1 | 1266  | 269  | 831 | 9.13022007 | 22.9465466  | 1.329555508  | Up   | 0         | 0         | AAEL006663-PA OS=Aedes aegypti GN=AAEL006663 PE=4 SV=1                                              |

|             |      |      |     |            |             |              |      |           |           |                                                                        |
|-------------|------|------|-----|------------|-------------|--------------|------|-----------|-----------|------------------------------------------------------------------------|
| CCG002991.1 | 1636 | 132  | 832 | 3.4669957  | 17.77829234 | 2.358358803  | Up   | 1.46E-13  | 4.36E-13  | AAEL004385-PA OS=Aedes aegypti GN=AAEL004385 PE=4 SV=1                 |
| CCG012210.1 | 1068 | 136  | 832 | 5.47180141 | 27.23341411 | 2.315290081  | Up   | 1.70E-13  | 4.98E-13  | -                                                                      |
| CCG025392.1 | 1191 | 232  | 832 | 8.37025897 | 24.42089528 | 1.544771927  | Up   | 2.91E-13  | 8.06E-13  | AAEL005410-PA OS=Aedes aegypti GN=AAEL005410 PE=4 SV=1                 |
| CCG002275.1 | 1782 | 51   | 833 | 1.22977355 | 16.34132691 | 3.732060547  | Up   | 0         | 0         | AAEL0006750-PA OS=Aedes aegypti GN=AAEL006750 PE=4 SV=1                |
| CCG004556.1 | 2210 | 153  | 833 | 2.97482778 | 13.17658124 | 2.147098046  | Up   | 0         | 0         | AAEL011072-PA OS=Aedes aegypti GN=AAEL011072 PE=4 SV=1                 |
| CCG019560.1 | 1453 | 260  | 833 | 7.68900963 | 20.04146218 | 1.382118076  | Up   | 3.22E-13  | 8.81E-13  | AAEL010784-PA OS=Aedes aegypti GN=AAEL010784 PE=4 SV=1                 |
| CCG015801.1 | 570  | 284  | 833 | 21.4094818 | 51.08814834 | 1.25473877   | Up   | 0         | 0         | AAEL007494-PA OS=Aedes aegypti GN=AAEL007494 PE=4 SV=1                 |
| CCG001517.1 | 3534 | 71   | 834 | 0.86328556 | 8.249915911 | 3.256469658  | Up   | 0         | 0         | AAEL010401-PA OS=Aedes aegypti GN=AAEL010401 PE=4 SV=1                 |
| CCG027053.1 | 2231 | 211  | 834 | 4.0639238  | 13.0682218  | 1.685117589  | Up   | 1.30E-13  | 3.98E-13  | AAEL012291-PA OS=Aedes aegypti GN=AAEL012291 PE=4 SV=1                 |
| CCG005070.1 | 1995 | 221  | 834 | 4.76005581 | 14.61413676 | 1.618314218  | Up   | 0         | 0         | AAEL015141-PA OS=Aedes aegypti GN=AAEL015141 PE=4 SV=1                 |
| CCG017797.1 | 1876 | 337  | 834 | 7.71897685 | 15.54115289 | 1.009611996  | Up   | 0         | 0         | AAEL001480-PA OS=Aedes aegypti GN=AAEL001480 PE=4 SV=1                 |
| CCG005953.1 | 2124 | 115  | 835 | 2.32651576 | 13.7430137  | 2.56245554   | Up   | 6.13E-14  | 2.03E-13  | AAEL0006075-PA OS=Aedes aegypti GN=AAEL006075 PE=4 SV=1                |
| CCG025311.1 | 873  | 149  | 835 | 7.33389514 | 33.43661066 | 2.188777071  | Up   | 2.33E-13  | 6.62E-13  | AAEL0006678-PA OS=Aedes aegypti GN=AAEL006678 PE=4 SV=1                |
| CCG028260.1 | 1588 | 54   | 836 | 1.46118745 | 18.40372757 | 3.654784834  | Up   | 0         | 0         | AAEL000261-PA OS=Aedes aegypti GN=AAEL000261 PE=4 SV=1                 |
| CCG013693.1 | 2362 | 116  | 836 | 2.11028333 | 12.37303953 | 2.551691341  | Up   | 1.16E-13  | 3.58E-13  | AAEL012969-PA OS=Aedes aegypti GN=AAEL012969 PE=4 SV=1                 |
| CCG004573.1 | 4047 | 1791 | 836 | 19.0162576 | 7.221428066 | -1.396877286 | Down | 3.59E-128 | 1.99E-127 | Quick-to-court OS=Culex quinquefasciatus GN=CpipJ_CPIJ007694 PE=4 SV=1 |
| CCG004252.1 | 2855 | 2107 | 836 | 31.7118147 | 10.23646914 | -1.631302263 | Down | 3.41E-189 | 2.02E-188 | AAEL012655-PA OS=Aedes aegypti GN=AAEL012655 PE=3 SV=1                 |
| CCG015513.1 | 542  | 0    | 837 | 0.001      | 53.98538313 | 15.72028122  | Up   | 4.44E-16  | 1.64E-15  | -                                                                      |

|             |      |      |     |            |             |             |      |          |          |                                                                                          |
|-------------|------|------|-----|------------|-------------|-------------|------|----------|----------|------------------------------------------------------------------------------------------|
| CCG017767.1 | 1992 | 91   | 837 | 1.96297482 | 14.68879401 | 2.903602376 | Up   | 0        | 0        | AAEL006227-PA OS=Aedes aegypti GN=AAEL006227 PE=4 SV=1                                   |
| CCG000226.1 | 667  | 114  | 838 | 7.34415254 | 43.92059361 | 2.580229623 | Up   | 8.48E-14 | 2.70E-13 | AAEL007466-PA OS=Aedes aegypti GN=AAEL007466 PE=4 SV=1                                   |
| CCG012471.1 | 4986 | 198  | 838 | 1.70637935 | 5.875458471 | 1.783763017 | Up   | 0        | 0        | Uncharacterized protein OS=Anopheles darlingi GN=AND_13311 PE=4 SV=1                     |
| CCG002968.1 | 885  | 240  | 838 | 11.6528094 | 33.10173552 | 1.506229042 | Up   | 0        | 0        | AAEL009700-PA OS=Aedes aegypti GN=AAEL009700 PE=4 SV=1                                   |
| CCG017473.1 | 3174 | 256  | 838 | 3.46573789 | 9.229689961 | 1.413119638 | Up   | 0        | 0        | AAEL010928-PA (Fragment) OS=Aedes aegypti GN=AAEL010928 PE=4 SV=1                        |
| CCG006505.1 | 1293 | 168  | 839 | 5.58307457 | 22.68367688 | 2.022522781 | Up   | 1.45E-13 | 4.33E-13 | Ubiquitin fusion degradation protein 2 OS=Aedes aegypti PE=2 SV=1                        |
| CCG027531.2 | 2432 | 291  | 839 | 5.14152663 | 12.06003051 | 1.229964861 | Up   | 6.00E-14 | 1.99E-13 | AAEL012054-PA OS=Aedes aegypti GN=AAEL012054 PE=4 SV=1                                   |
| CCG022090.1 | 2040 | 8769 | 839 | 184.706668 | 14.37744814 | -3.68335641 | Down | 0        | 0        | AAEL008513-PA (Fragment) OS=Aedes aegypti GN=AAEL008513 PE=4 SV=1                        |
| CCG005724.1 | 846  | 143  | 840 | 7.26320573 | 34.71034573 | 2.256687385 | Up   | 0        | 0        | AAEL002375-PA OS=Aedes aegypti GN=AAEL002375 PE=4 SV=1                                   |
| CCG022131.1 | 1575 | 23   | 841 | 0.62749454 | 18.66661001 | 4.894713238 | Up   | 4.01E-11 | 8.67E-11 | Alkaline phosphatase OS=Aedes aegypti GN=AAEL003313 PE=3 SV=1                            |
| CCG001051.1 | 893  | 102  | 841 | 4.90807719 | 32.92263244 | 2.745849852 | Up   | 0        | 0        | AAEL002758-PA OS=Aedes aegypti GN=AAEL002758 PE=4 SV=1                                   |
| CCG012434.1 | 1466 | 302  | 841 | 8.85188257 | 20.05450939 | 1.179870455 | Up   | 4.59E-13 | 1.20E-12 | AAEL000064-PA OS=Aedes aegypti GN=DCE PE=2 SV=1                                          |
| CCG014229.1 | 2403 | 342  | 841 | 6.11554275 | 12.23466948 | 1.000422679 | Up   | 1.09E-13 | 3.41E-13 | AAEL003875-PA OS=Aedes aegypti GN=AAEL003875 PE=4 SV=1                                   |
| CCG003750.1 | 921  | 41   | 843 | 1.91287635 | 31.99764095 | 4.06415002  | Up   | 1.02E-13 | 3.19E-13 | AAEL009650-PA OS=Aedes aegypti GN=AAEL009650 PE=4 SV=1                                   |
| CCG022536.3 | 1904 | 252  | 843 | 5.68717076 | 15.47785048 | 1.444422101 | Up   | 5.42E-14 | 1.81E-13 | Putative uncharacterized protein OS=Culex quinquefasciatus GN=CpipJ_CPIJ006732 PE=4 SV=1 |

|             |      |      |     |            |             |              |      |           |           |                                                                                         |
|-------------|------|------|-----|------------|-------------|--------------|------|-----------|-----------|-----------------------------------------------------------------------------------------|
| CCG017645.1 | 1273 | 341  | 843 | 11.5103531 | 23.14990363 | 1.008074096  | Up   | 2.98E-13  | 8.25E-13  | AGAP012135-PA OS=Anopheles gambiae GN=AGAP012135 PE=4 SV=4                              |
| CCG017497.1 | 1215 | 2083 | 843 | 73.6674545 | 24.25500191 | -1.602745099 | Down | 2.38E-182 | 1.40E-181 | Short-chain dehydrogenase OS=Culex quinquefasciatus GN=CpipJ_CPIJ011768 PE=3 SV=1       |
| CCG011449.1 | 1014 | 21   | 844 | 0.88990575 | 29.09742169 | 5.03109497   | Up   | 1.76E-10  | 3.73E-10  | AAEL000687-PA OS=Aedes aegypti GN=AAEL006887 PE=3 SV=1                                  |
| CCG000562.1 | 1609 | 103  | 844 | 2.75070396 | 18.33734344 | 2.736911865  | Up   | 0         | 0         | Histone acetyltransferase Tipoo OS=Culex quinquefasciatus GN=CpipJ_CPIJ001206 PE=4 SV=1 |
| CCG007719.1 | 723  | 191  | 844 | 11.3516173 | 40.80883208 | 1.845983564  | Up   | 6.68E-14  | 2.19E-13  | AAEL002532-PA OS=Aedes aegypti GN=Aael_AEL002532 PE=4 SV=1                              |
| CCG019585.1 | 4251 | 217  | 844 | 2.19346799 | 6.940669394 | 1.66186116   | Up   | 1.47E-13  | 4.37E-13  | AAEL001244-PA OS=Aedes aegypti GN=AAEL001244 PE=4 SV=1                                  |
| CCG022110.1 | 2060 | 232  | 844 | 4.83930992 | 14.32271145 | 1.565431397  | Up   | 2.91E-13  | 8.05E-13  | AAEL012912-PA OS=Aedes aegypti GN=AAEL012912 PE=4 SV=1                                  |
| CCG009108.1 | 2277 | 293  | 844 | 5.52926317 | 12.9577451  | 1.228655538  | Up   | 4.19E-13  | 1.11E-12  | AAEL014027-PA OS=Aedes aegypti GN=AAEL014027 PE=4 SV=1                                  |
| CCG026016.1 | 1092 | 2365 | 844 | 93.0617421 | 27.01903443 | -1.784212076 | Down | 7.50E-241 | 4.60E-240 | AAEL011130-PA OS=Aedes aegypti GN=AAEL011130 PE=3 SV=1                                  |
| CCG002877.1 | 1013 | 3169 | 844 | 134.423582 | 29.1261457  | -2.206399552 | Down | 0         | 0         | AAEL000377-PA OS=Aedes aegypti GN=AAEL006377 PE=4 SV=1                                  |
| CCG012741.1 | 610  | 118  | 845 | 8.31217817 | 48.42580963 | 2.542477686  | Up   | 0         | 0         | AAEL005263-PA OS=Aedes aegypti GN=AAEL005263 PE=4 SV=1                                  |
| CCG013855.1 | 3669 | 162  | 845 | 1.89727365 | 8.051170311 | 2.085270732  | Up   | 0         | 0         | Tetrapeptide repeat protein 37 OS=Culex quinquefasciatus GN=CpipJ_CPIJ001407 PE=4 SV=1  |
| CCG001750.1 | 3361 | 165  | 845 | 2.10949307 | 8.788974672 | 2.058798521  | Up   | 1.31E-14  | 4.67E-14  | AAEL001962-PA OS=Aedes aegypti GN=AAEL001962 PE=4 SV=1                                  |
| CCG015171.1 | 2223 | 1581 | 845 | 30.5601216 | 13.28823386 | -1.201500917 | Down | 6.06E-90  | 3.15E-89  | AAEL003402-PA OS=Aedes aegypti GN=AAEL003402 PE=4 SV=1                                  |
| CCG015746.1 | 1575 | 2215 | 845 | 60.4304522 | 18.75539293 | -1.687970248 | Down | 9.46E-209 | 5.67E-208 | Putative adenosine deaminase OS=Aedes albopictus PE=2 SV=1                              |

|             |      |      |     |            |             |              |      |          |            |                                                                                                      |
|-------------|------|------|-----|------------|-------------|--------------|------|----------|------------|------------------------------------------------------------------------------------------------------|
| CCG013889.1 | 851  | 75   | 846 | 3.78699189 | 34.75288149 | 3.198008366  | Up   | 0        | 0          | AAEL002108-PA OS=Aedes aegypti GN=AAEL002108 PE=4 SV=1                                               |
| CCG020082.1 | 315  | 1386 | 846 | 189.066832 | 93.88794333 | -1.009884485 | Down | 5.00E-60 | 2.41E-59   | AAEL011156-PA OS=Aedes aegypti GN=AAEL011156 PE=4 SV=1                                               |
| CCG019405.1 | 1218 | 3693 | 846 | 130.285082 | 24.28136465 | -2.42375049  | Down | 0        | 0          | Triosephosphate isomerase OS=Aedes aegypti GN=AAEL002542 PE=3 SV=1                                   |
| CCG024960.1 | 3189 | 117  | 847 | 1.57650014 | 9.28493585  | 2.558166644  | Up   | 9.44E-14 | 2.97E-13   | AAEL007123-PA (Fragment) OS=Aedes aegypti GN=AAEL007123 PE=3 SV=2                                    |
| CCG015569.1 | 2200 | 82   | 848 | 1.6015992  | 13.47482668 | 3.072681654  | Up   | 0        | 0          | AAEL008459-PA OS=Aedes aegypti GN=AAEL008459 PE=4 SV=1                                               |
| CCG018251.1 | 2006 | 135  | 848 | 2.89178174 | 14.77797543 | 2.353418061  | Up   | 1.90E-13 | 5.48E-13   | AAEL007921-PA OS=Aedes aegypti GN=AAEL007921 PE=4 SV=1                                               |
| CCG001736.1 | 1495 | 152  | 848 | 4.3688292  | 19.82917639 | 2.182306145  | Up   | 8.39E-14 | 2.69E-13   | Zinc-dependent metallopeptidase OS=Capsaspora owczarzaki (strain ATCC 30864) GN=CAOG_06679 PE=4 SV=1 |
| CCG005418.1 | 1002 | 198  | 848 | 8.4910254  | 29.58544781 | 1.800877038  | Up   | 0        | 0          | AAEL010465-PA OS=Aedes aegypti GN=AAEL010465 PE=4 SV=1                                               |
| CCG018513.1 | 1194 | 229  | 848 | 8.24126401 | 24.82798886 | 1.59102987   | Up   | 2.46E-13 | 6.93E-13   | AAEL006752-PA OS=Aedes aegypti GN=AAEL006752 PE=4 SV=1                                               |
| CCG020277.1 | 1920 | 283  | 848 | 6.33355984 | 15.43990557 | 1.285575416  | Up   | 0        | 0          | AAEL008491-PA OS=Aedes aegypti GN=AAEL008491 PE=4 SV=1                                               |
| CCG011353.1 | 736  | 2    | 849 | 0.11676558 | 40.3255122  | 8.431933947  | Up   | 9.36E-05 | 0.00015357 | -                                                                                                    |
| CCG013411.1 | 1324 | 82   | 849 | 2.66126755 | 22.41659893 | 3.074381943  | Up   | 0        | 0          | Predicted protein OS=Culex quinquefasciatus GN=CpipJ_CPIJ000594 PE=4 SV=1                            |
| CCG001912.1 | 1280 | 98   | 849 | 3.28987031 | 23.18716952 | 2.817224103  | Up   | 0        | 0          | AAEL004355-PA OS=Aedes aegypti GN=AAEL004355 PE=4 SV=1                                               |
| CCG015156.1 | 3018 | 244  | 849 | 3.47402758 | 9.834187203 | 1.50119661   | Up   | 2.78E-13 | 7.73E-13   | AAEL007624-PA OS=Aedes aegypti GN=REL2 PE=4 SV=1                                                     |
| CCG001009.1 | 3591 | 47   | 850 | 0.56239976 | 8.274724382 | 3.879043383  | Up   | 0        | 0          | terminal deoxycytidyl transferase rev1 OS=Culex quinquefasciatus GN=CpipJ_CPIJ007351 PE=4 SV=1       |

|             |       |      |     |            |             |              |      |           |           |                                                                      |
|-------------|-------|------|-----|------------|-------------|--------------|------|-----------|-----------|----------------------------------------------------------------------|
| CCG019012.1 | 25109 | 6849 | 850 | 11.7208854 | 1.183421692 | -3.30804541  | Down | 0         | 0         | IP20063p OS=Drosophila melanogaster GN=CG33276-RB PE=4 SV=1          |
| CCG021418.1 | 870   | 325  | 851 | 16.0519124 | 34.19482015 | 1.091032618  | Up   | 1.19E-13  | 3.65E-13  | AAEL010964-PA OS=Aedes aegypti GN=AAEL010964 PE=4 SV=1               |
| CCG021911.1 | 7275  | 1466 | 851 | 8.65891834 | 4.089277462 | -1.082340863 | Down | 7.69E-71  | 3.82E-70  | Myosin-vIIra OS=Culex quinquefasciatus GN=CpipJ_CPIJ004181 PE=4 SV=1 |
| CCG020775.1 | 843   | 2110 | 852 | 107.551768 | 35.33149681 | -1.60600446  | Down | 3.13E-185 | 1.84E-184 | AAEL012408-PA OS=Aedes aegypti GN=AAEL012408 PE=4 SV=1               |
| CCG013446.1 | 3510  | 2843 | 852 | 34.8042608 | 8.485598806 | -2.03617556  | Down | 0         | 0         | AAEL005464-PA OS=Aedes aegypti GN=AAEL005464 PE=4 SV=1               |
| CCG011917.1 | 1059  | 5097 | 852 | 206.814672 | 28.12507253 | -2.878409814 | Down | 0         | 0         | AAEL010260-PA OS=Aedes aegypti GN=AAEL010260 PE=4 SV=1               |
| CCG014486.1 | 2553  | 51   | 853 | 0.85838483 | 11.68014496 | 3.766289793  | Up   | 0         | 0         | AAEL004200-PA OS=Aedes aegypti GN=AAEL004200 PE=3 SV=1               |
| CCG024368.1 | 639   | 102  | 853 | 6.85901867 | 46.66574348 | 2.766289793  | Up   | 0         | 0         | AAEL011710-PA OS=Aedes aegypti GN=AAEL011710 PE=4 SV=1               |
| CCG021213.1 | 483   | 330  | 853 | 29.3582038 | 61.73790908 | 1.072392921  | Up   | 1.76E-13  | 5.16E-13  | AAEL004813-PA OS=Aedes aegypti GN=AAEL004813 PE=4 SV=1               |
| CCG007402.1 | 1013  | 4836 | 853 | 205.134883 | 29.43673256 | -2.800883394 | Down | 0         | 0         | AAEL004065-PA OS=Aedes aegypti GN=AAEL004065 PE=4 SV=1               |
| CCG001999.1 | 399   | 20   | 854 | 2.15387141 | 74.82297835 | 5.118477369  | Up   | 3.69E-10  | 7.70E-10  | Short form D7 salivary protein SD7-1 OS=Aedes albopictus PE=2 SV=1   |
| CCG021890.1 | 1635  | 8    | 856 | 0.21024947 | 18.30231493 | 6.44378019   | Up   | 2.19E-06  | 3.96E-06  | AAEL000053-PA OS=Aedes aegypti GN=AAEL000053 PE=4 SV=1               |
| CCG020724.1 | 1566  | 182  | 856 | 4.99392829 | 19.10873877 | 1.93598555   | Up   | 0         | 0         | AAEL011251-PA OS=Aedes aegypti GN=AAEL011251 PE=4 SV=1               |
| CCG024983.3 | 1875  | 192  | 856 | 4.40010082 | 15.95961862 | 1.858817689  | Up   | 0         | 0         | AAEL002349-PA OS=Aedes aegypti GN=AAEL002349 PE=4 SV=1               |
| CCG021529.1 | 2271  | 223  | 856 | 4.2193971  | 13.17669966 | 1.64288029   | Up   | 0         | 0         | AAEL011269-PA OS=Aedes aegypti GN=AAEL011269 PE=4 SV=1               |
| CCG021378.1 | 558   | 276  | 856 | 21.2538472 | 53.62775075 | 1.335255733  | Up   | 0         | 0         | AAEL008740-PA OS=Aedes aegypti GN=AAEL008740 PE=4 SV=1               |



|             |      |      |     |            |             |              |      |           |           |                                                                   |
|-------------|------|------|-----|------------|-------------|--------------|------|-----------|-----------|-------------------------------------------------------------------|
| CCG020400.2 | 5559 | 2125 | 857 | 16.4257395 | 5.389322395 | -1.607782528 | Down | 7.83E-187 | 4.63E-186 | AAEL003837-PA OS=Aedes aegypti GN=AAEL003837 PE=4 SV=1            |
| CCG025258.1 | 1455 | 56   | 858 | 1.65381796 | 20.61457146 | 3.639792119  | Up   | 0         | 0         | AAEL007464-PA OS=Aedes aegypti GN=AAEL007464 PE=4 SV=1            |
| CCG016249.1 | 1344 | 137  | 858 | 4.38009944 | 22.31711419 | 2.349114958  | Up   | 2.90E-13  | 8.03E-13  | AAEL003004-PA OS=Aedes aegypti GN=AAEL003004 PE=4 SV=1            |
| CCG025189.1 | 567  | 308  | 858 | 23.3415842 | 52.89982623 | 1.180360501  | Up   | 0         | 0         | AAEL000950-PA OS=Aedes aegypti GN=AAEL000950 PE=4 SV=1            |
| CCG021612.1 | 2132 | 130  | 859 | 2.62010577 | 14.08497174 | 2.426459712  | Up   | 0         | 0         | AAEL012932-PA OS=Aedes aegypti GN=AAEL012932 PE=4 SV=1            |
| CCG001798.1 | 3414 | 142  | 860 | 1.78725903 | 8.806127131 | 2.300758934  | Up   | 2.62E-13  | 7.34E-13  | AAEL002465-PA (Fragment) OS=Aedes aegypti GN=AAEL002465 PE=4 SV=1 |
| CCG012740.1 | 3168 | 1445 | 860 | 19.5995159 | 9.489936245 | -1.046347724 | Down | 3.56E-66  | 1.74E-65  | AAEL005763-PA (Fragment) OS=Aedes aegypti GN=AAEL005763 PE=4 SV=1 |
| CCG011878.1 | 650  | 3154 | 860 | 208.502374 | 46.25248927 | -2.172460891 | Down | 0         | 0         | AAEL003593-PA OS=Aedes aegypti GN=AAEL003593 PE=4 SV=1            |
| CCG001773.1 | 1536 | 78   | 861 | 2.18205684 | 19.5957528  | 3.166780412  | Up   | 0         | 0         | AAEL010805-PA OS=Aedes aegypti GN=AAEL010805 PE=4 SV=1            |
| CCG027927.1 | 1788 | 107  | 861 | 2.57145504 | 16.83393529 | 2.710715645  | Up   | 0         | 0         | AGAP003794-PA OS=Anopheles gambiae GN=AgaP_AGAP003794 PE=4 SV=5   |
| CCG003441.1 | 1503 | 140  | 861 | 4.00250356 | 20.02599887 | 2.322899614  | Up   | 0         | 0         | AAEL012851-PA OS=Aedes aegypti GN=AAEL012851 PE=4 SV=1            |
| CCG010478.1 | 1386 | 36   | 862 | 1.116097   | 21.74172769 | 4.283932261  | Up   | 6.13E-14  | 2.03E-13  | AAEL008210-PA OS=Aedes aegypti GN=AAEL008210 PE=4 SV=1            |
| CCG026557.1 | 900  | 46   | 862 | 2.19623088 | 33.48226064 | 3.930295307  | Up   | 3.40E-14  | 1.18E-13  | AAEL008316-PA OS=Aedes aegypti GN=AAEL008316 PE=4 SV=1            |
| CCG023883.1 | 1554 | 5378 | 862 | 148.707357 | 19.39127064 | -2.938996777 | Down | 0         | 0         | AAEL001816-PA OS=Aedes aegypti GN=AAEL001816 PE=3 SV=1            |
| CCG023670.1 | 1407 | 86   | 863 | 2.62643723 | 21.44207026 | 3.029265198  | Up   | 0         | 0         | AAEL002044-PA OS=Aedes aegypti GN=AAEL002044 PE=4 SV=1            |
| CCG020559.1 | 2169 | 211  | 863 | 4.18008944 | 13.90917144 | 1.734430764  | Up   | 1.30E-13  | 3.98E-13  | AAEL009731-PA OS=Aedes aegypti GN=AAEL009731 PE=4 SV=1            |

|             |      |      |     |            |             |              |      |           |           |                                                                       |
|-------------|------|------|-----|------------|-------------|--------------|------|-----------|-----------|-----------------------------------------------------------------------|
| CCG020519.1 | 1355 | 293  | 863 | 9.29161051 | 22.26493938 | 1.260773099  | Up   | 4.19E-13  | 1.11E-12  | AAEL008561-PA OS=Aedes aegypti GN=AAEL008561 PE=4 SV=1                |
| CCG017599.1 | 655  | 1954 | 863 | 128.187575 | 46.05953108 | -1.476684799 | Down | 8.66E-152 | 4.93E-151 | Conserved insect protein (Fragment) OS=Aedes aegypti PE=2 SV=1        |
| CCG027580.1 | 1641 | 104  | 866 | 2.72324948 | 18.44842638 | 2.7600967    | Up   | 0         | 0         | AGAP004337-PA OS=Anopheles gambiae GN=AgaP_AGAP004337 PE=3 SV=5       |
| CCG017180.1 | 2002 | 116  | 866 | 2.48975485 | 15.12181203 | 2.602555423  | Up   | 1.16E-13  | 3.59E-13  | AAEL013593-PA OS=Aedes aegypti GN=AAEL013593 PE=4 SV=1                |
| CCG011504.1 | 1758 | 135  | 866 | 3.29972365 | 17.22063008 | 2.383720821  | Up   | 1.90E-13  | 5.49E-13  | AAEL007858-PA OS=Aedes aegypti GN=AAEL007858 PE=4 SV=1                |
| CCG026942.1 | 901  | 177  | 866 | 8.44133521 | 33.6002971  | 1.992930868  | Up   | 0         | 0         | AAEL000055-PA OS=Aedes aegypti GN=AAEL000055 PE=4 SV=1                |
| CCG008551.1 | 726  | 5230 | 866 | 309.547813 | 41.69954227 | -2.892058813 | Down | 0         | 0         | AAEL008289-PA OS=Aedes aegypti GN=AAEL008289 PE=4 SV=1                |
| CCG009469.1 | 1665 | 9031 | 866 | 233.068873 | 18.18250311 | -3.680133612 | Down | 0         | 0         | AAEL008343-PA OS=Aedes aegypti GN=CYP4G35 PE=3 SV=1                   |
| CCG026309.1 | 2962 | 171  | 867 | 2.48069704 | 10.23255434 | 2.044348872  | Up   | 3.42E-13  | 9.27E-13  | AGAP010179-PA (Fragment) OS=Anopheles gambiae GN=AGAP010179 PE=4 SV=4 |
| CCG005052.2 | 822  | 184  | 867 | 9.6185294  | 36.87205105 | 1.938639431  | Up   | 3.33E-13  | 9.08E-13  | AAEL002700-PA OS=Aedes aegypti GN=AAEL002700 PE=4 SV=1                |
| CCG001445.1 | 1196 | 290  | 867 | 10.4190828 | 25.34182773 | 1.282292297  | Up   | 1.62E-13  | 4.78E-13  | AAEL003246-PA OS=Aedes aegypti GN=AAEL003246 PE=4 SV=1                |
| CCG026619.1 | 1545 | 297  | 867 | 8.26020141 | 19.61736308 | 1.247882266  | Up   | 2.44E-13  | 6.87E-13  | AAEL004757-PA OS=Aedes aegypti GN=AAEL004757 PE=4 SV=1                |
| CCG018249.1 | 1247 | 76   | 868 | 2.61884509 | 24.33342762 | 3.215936923  | Up   | 0         | 0         | AAEL013453-PA OS=Aedes aegypti GN=AAEL013453 PE=4 SV=1                |
| CCG003614.1 | 1163 | 105  | 868 | 3.87946873 | 26.09095807 | 2.749618919  | Up   | 0         | 0         | AAEL006796-PA OS=Aedes aegypti GN=AAEL006796 PE=4 SV=1                |
| CCG003048.1 | 2679 | 333  | 868 | 5.34114282 | 11.32653387 | 1.084486069  | Up   | 4.41E-13  | 1.16E-12  | AAEL010364-PA OS=Aedes aegypti GN=AAEL010364 PE=4 SV=1                |

|             |      |      |     |            |             |             |      |          |          |                                                                                                   |
|-------------|------|------|-----|------------|-------------|-------------|------|----------|----------|---------------------------------------------------------------------------------------------------|
| CCG013611.1 | 1491 | 50   | 869 | 1.44097031 | 20.37474347 | 3.821669381 | Up   | 0        | 0        | Putative uncharacterized protein<br>OS=Culex quinquefasciatus<br>GN=CpipJ_CPIJ005572 PE=4<br>SV=1 |
| CCG017128.2 | 690  | 104  | 869 | 6.47659768 | 44.02716307 | 2.765085852 | Up   | 0        | 0        | AAEL008403-PA OS=Aedes<br>aegypti GN=AAEL008403 PE=4<br>SV=1                                      |
| CCG007617.1 | 1515 | 133  | 869 | 3.77226053 | 20.05197526 | 2.410243135 | Up   | 9.90E-14 | 3.11E-13 | AAEL013522-PA OS=Aedes<br>aegypti GN=AAEL013522 PE=4<br>SV=1                                      |
| CCG000839.1 | 1788 | 222  | 869 | 5.33516839 | 16.99034816 | 1.671109704 | Up   | 0        | 0        | Mi-primase inducer phosphatase 2<br>OS=Culex quinquefasciatus<br>GN=CpipJ_CPIJ001662 PE=4<br>SV=1 |
| CCG012670.1 | 1818 | 224  | 869 | 5.29440074 | 16.70997938 | 1.658170649 | Up   | 2.04E-13 | 5.87E-13 | AAEL001398-PA (Fragment)<br>OS=Aedes aegypti<br>GN=AAEL001398 PE=4 SV=1                           |
| CCG027521.1 | 1329 | 238  | 869 | 7.69510672 | 22.85834651 | 1.570707807 | Up   | 6.86E-13 | 1.73E-12 | AAEL007985-PA OS=Aedes<br>aegypti GN=AAEL007985 PE=4<br>SV=1                                      |
| CCG012050.1 | 1440 | 8678 | 869 | 258.952331 | 21.09634897 | -3.6176213  | Down | 0        | 0        | AAEL000992-PA OS=Aedes<br>aegypti GN=CYP6AG6 PE=3<br>SV=1                                         |
| CCG001174.2 | 1758 | 194  | 870 | 4.74182509 | 17.3001711  | 1.867271952 | Up   | 5.97E-13 | 1.53E-12 | Uncharacterized protein<br>OS=Anopheles darlingi<br>GN=AND_10957 PE=4 SV=1                        |
| CCG011230.1 | 561  | 0    | 872 | 0.001      | 54.33799883 | 15.72967381 | Up   | 4.44E-16 | 1.66E-15 | 5-hydroxyisourate hydrolase<br>OS=Culex quinquefasciatus<br>GN=CpipJ_CPIJ014057 PE=3<br>SV=1      |
| CCG004581.1 | 729  | 3    | 872 | 0.17683018 | 41.81566165 | 7.885535028 | Up   | 5.28E-05 | 8.85E-05 | -                                                                                                 |
| CCG003086.1 | 1360 | 83   | 872 | 2.62241763 | 22.41442452 | 3.095458097 | Up   | 1.32E-13 | 4.02E-13 | AAEL006235-PA OS=Aedes<br>aegypti GN=AAEL006235 PE=4<br>SV=1                                      |
| CCG000913.1 | 1387 | 193  | 872 | 5.97920604 | 21.9780947  | 1.878040491 | Up   | 6.08E-14 | 2.02E-13 | AAEL013048-PA OS=Aedes<br>aegypti GN=AAEL013048 PE=4<br>SV=1                                      |
| CCG010965.1 | 1453 | 200  | 872 | 5.9146228  | 20.97977794 | 1.826641339 | Up   | 0        | 0        | AAEL007971-PA OS=Aedes<br>aegypti GN=AAEL007971 PE=4<br>SV=1                                      |
| CCG016747.1 | 1491 | 224  | 872 | 6.45554698 | 20.44508206 | 1.663142607 | Up   | 2.04E-13 | 5.88E-13 | AAEL000559-PA OS=Aedes<br>aegypti GN=AAEL000559 PE=4<br>SV=1                                      |
| CCG008955.1 | 2931 | 321  | 872 | 4.70599959 | 10.40041533 | 1.144068041 | Up   | 0        | 0        | AAEL010200-PA OS=Aedes<br>aegypti GN=AAEL010200 PE=4<br>SV=1                                      |

|             |      |      |     |            |             |              |      |          |            |                                                                   |
|-------------|------|------|-----|------------|-------------|--------------|------|----------|------------|-------------------------------------------------------------------|
| CCG011156.1 | 3552 | 134  | 873 | 1.62104292 | 8.591941335 | 2.406061857  | Up   | 0        | 0          | AAEL006614-PA OS=Aedes aegypti GN=AAEL006614 PE=4 SV=1            |
| CCG027379.1 | 3784 | 337  | 873 | 3.82685004 | 8.065162691 | 1.075546266  | Up   | 0        | 0          | AAEL001252-PA OS=Aedes aegypti GN=AAEL001252 PE=4 SV=1            |
| CCG026474.1 | 362  | 2    | 874 | 0.23740185 | 84.40202735 | 8.473802673  | Up   | 9.36E-05 | 0.00015321 | willstoni t1ZA OS=Drosopma willstoni GN=GK10379 PE=3 SV=1         |
| CCG027570.1 | 2059 | 83   | 874 | 1.73214569 | 14.83901598 | 3.098763242  | Up   | 1.32E-13 | 4.01E-13   | AAEL002462-PA OS=Aedes aegypti GN=AAEL002462 PE=4 SV=1            |
| CCG021275.1 | 1620 | 93   | 874 | 2.46678106 | 18.86020611 | 2.934643862  | Up   | 4.04E-14 | 1.39E-13   | AAEL010656-PA OS=Aedes aegypti GN=AAEL010656 PE=4 SV=1            |
| CCG025132.1 | 1969 | 184  | 874 | 4.01545514 | 15.51728486 | 1.950240717  | Up   | 3.33E-13 | 9.08E-13   | AAEL014752-PA OS=Aedes aegypti GN=AAEL014752 PE=4 SV=1            |
| CCG013554.1 | 1179 | 257  | 874 | 9.36660034 | 25.91478702 | 1.468178124  | Up   | 4.14E-13 | 1.10E-12   | AAEL000290-PA OS=Aedes aegypti GN=AAEL000290 PE=4 SV=1            |
| CCG014281.1 | 1494 | 201  | 875 | 5.78106871 | 20.47422502 | 1.824400719  | Up   | 0        | 0          | AAEL007943-PA OS=Aedes aegypti GN=AAEL007943 PE=4 SV=1            |
| CCG002121.1 | 1911 | 300  | 875 | 6.74564123 | 16.00653698 | 1.24663372   | Up   | 1.10E-13 | 3.42E-13   | AAEL001859-PA OS=Aedes aegypti GN=AAEL001859 PE=4 SV=1            |
| CCG010484.1 | 897  | 1    | 876 | 0.04790383 | 34.13985558 | 9.477100263  | Up   | 0.000587 | 0.00091638 | AAEL013295-PA OS=Aedes aegypti GN=AAEL013295 PE=4 SV=1            |
| CCG009343.1 | 1614 | 33   | 876 | 0.87856335 | 18.97363721 | 4.432706144  | Up   | 1.31E-13 | 4.01E-13   | AAEL003100-PA OS=Aedes aegypti GN=AAEL003100 PE=2 SV=1            |
| CCG017891.1 | 1557 | 43   | 876 | 1.1867043  | 19.6682405  | 4.050835509  | Up   | 8.46E-14 | 2.70E-13   | AAEL000148-PA OS=Aedes aegypti GN=AAEL000148 PE=4 SV=1            |
| CCG011760.1 | 1755 | 284  | 876 | 6.95350691 | 17.44925952 | 1.327353144  | Up   | 0        | 0          | AAEL003371-PA OS=Aedes aegypti GN=AAEL003371 PE=4 SV=1            |
| CCG001005.1 | 651  | 317  | 876 | 20.9238185 | 47.0406305  | 1.168761233  | Up   | 2.22E-13 | 6.35E-13   | AAEL010486-PA OS=Aedes aegypti GN=AAEL010486 PE=4 SV=1            |
| CCG019867.2 | 495  | 1624 | 876 | 140.975453 | 61.86555647 | -1.188235654 | Down | 9.55E-91 | 4.97E-90   | AAEL003423-PA OS=Aedes aegypti GN=AAEL003423 PE=4 SV=1            |
| CCG007334.1 | 2102 | 142  | 877 | 2.90280795 | 14.58535144 | 2.328999117  | Up   | 2.62E-13 | 7.35E-13   | AAEL000077-PA OS=Aedes aegypti GN=AAEL000077 PE=4 SV=1            |
| CCG002916.1 | 1878 | 215  | 877 | 4.91932531 | 16.32503127 | 1.730553387  | Up   | 0        | 0          | AAEL001848-PA (Fragment) OS=Aedes aegypti GN=AAEL001848 PE=4 SV=1 |

|             |       |      |     |            |             |              |      |           |           |                                                                                                       |
|-------------|-------|------|-----|------------|-------------|--------------|------|-----------|-----------|-------------------------------------------------------------------------------------------------------|
| CCG016195.1 | 1801  | 1780 | 877 | 42.4686994 | 17.02299208 | -1.31891529  | Down | 9.72E-117 | 5.29E-116 | AAEL004957-PA OS=Aedes aegypti GN=AAEL004957 PE=4 SV=1                                                |
| CCG023529.1 | 2306  | 34   | 878 | 0.63355203 | 13.31021986 | 4.392927492  | Up   | 8.82E-14  | 2.80E-13  | AAEL001635-PA OS=Aedes aegypti GN=AAEL001635 PE=4 SV=1                                                |
| CCG024415.1 | 4326  | 80   | 878 | 0.79463217 | 7.095091772 | 3.158462238  | Up   | 0         | 0         | AAEL005539-PA OS=Aedes aegypti GN=AAEL005539 PE=4 SV=1                                                |
| CCG003757.1 | 3396  | 352  | 878 | 4.4538712  | 9.038093936 | 1.020958715  | Up   | 5.16E-13  | 1.34E-12  | AAEL003445-PA OS=Aedes aegypti GN=AAEL003445 PE=4 SV=1                                                |
| CCG023799.1 | 32813 | 1554 | 879 | 2.03501562 | 0.936468024 | -1.119738229 | Down | 3.80E-79  | 1.92E-78  | AAEL015040-PA OS=Aedes aegypti GN=AAEL015040 PE=4 SV=1                                                |
| CCG022911.1 | 8415  | 1599 | 879 | 8.16501553 | 3.651613224 | -1.160921665 | Down | 3.60E-86  | 1.85E-85  | Protein translocase subunit secA OS=Harpegnathos saltator GN=EAI_00772 PE=4 SV=1                      |
| CCG011810.1 | 2499  | 206  | 880 | 3.54212298 | 12.31023752 | 1.79717239   | Up   | 1.10E-13  | 3.44E-13  | Mediator of RNA polymerase II transcription subunit 16 OS=Acromyrmex echinator GN=G5I_13705 PE=4 SV=1 |
| CCG009038.1 | 4050  | 272  | 880 | 2.8858686  | 7.595872484 | 1.396210076  | Up   | 5.36E-13  | 1.38E-12  | AAEL002895-PA OS=Aedes aegypti GN=AAEL002895 PE=4 SV=1                                                |
| CCG001769.1 | 1125  | 1946 | 880 | 74.328092  | 27.34514094 | -1.442623077 | Down | 5.30E-146 | 3.00E-145 | AAEL002077-PA OS=Aedes aegypti GN=AAEL002077 PE=4 SV=1                                                |
| CCG023680.1 | 1122  | 29   | 881 | 1.11062594 | 27.4494134  | 4.627330418  | Up   | 6.66E-13  | 1.69E-12  | AAEL006407-PA OS=Aedes aegypti GN=AAEL006407 PE=4 SV=1                                                |
| CCG024867.1 | 5550  | 82   | 881 | 0.63486815 | 5.549232763 | 3.127759408  | Up   | 0         | 0         | AAEL013080-PA OS=Aedes aegypti GN=AAEL013080 PE=4 SV=1                                                |
| CCG005246.1 | 1344  | 119  | 882 | 3.80461192 | 22.94136913 | 2.592130286  | Up   | 0         | 0         | AAEL001917-PA OS=Aedes aegypti GN=AAEL001917 PE=4 SV=1                                                |
| CCG001261.1 | 1325  | 1723 | 882 | 55.87687   | 23.27033971 | -1.263758937 | Down | 7.31E-106 | 3.90E-105 | AAEL004229-PA OS=Aedes aegypti GN=GSTT4 PE=3 SV=1                                                     |
| CCG006334.1 | 3957  | 112  | 883 | 1.21622701 | 7.800899265 | 2.681227909  | Up   | 0         | 0         | Putative uncharacterized protein OS=Culex quinquefasciatus GN=CpipJ_CPIJ009355 PE=4 SV=1              |
| CCG020315.1 | 2882  | 257  | 883 | 3.83179105 | 10.71067258 | 1.482958282  | Up   | 4.14E-13  | 1.10E-12  | AAEL004756-PA OS=Aedes aegypti GN=AAEL004756 PE=4 SV=1                                                |

|             |       |      |     |            |             |              |      |           |           |                                                                                                         |
|-------------|-------|------|-----|------------|-------------|--------------|------|-----------|-----------|---------------------------------------------------------------------------------------------------------|
| CCG014421.1 | 1560  | 261  | 883 | 7.18916714 | 19.78728102 | 1.460676835  | Up   | 8.02E-14  | 2.58E-13  | AAEL014718-PA OS=Aedes aegypti GN=AAEL014718 PE=4 SV=1                                                  |
| CCG006078.1 | 1368  | 337  | 883 | 10.5853805 | 22.56444327 | 1.09197805   | Up   | 0         | 0         | AAEL007066-PA OS=Aedes aegypti GN=AAEL007066 PE=4 SV=1                                                  |
| CCG010744.1 | 1191  | 54   | 884 | 1.94824993 | 25.94720123 | 3.735328261  | Up   | 0         | 0         | AAEL006279-PA OS=Aedes aegypti GN=AAEL006279 PE=4 SV=1                                                  |
| CCG002681.1 | 1007  | 86   | 884 | 3.66970921 | 30.68829858 | 3.063951009  | Up   | 0         | 0         | AAEL006887-PA OS=Aedes aegypti GN=AAEL006887 PE=3 SV=1                                                  |
| CCG010680.1 | 1465  | 158  | 884 | 4.63427855 | 21.09427759 | 2.186435015  | Up   | 0         | 0         | AAEL002426-PA OS=Aedes aegypti GN=AAEL002426 PE=4 SV=1                                                  |
| CCG014948.1 | 1398  | 329  | 884 | 10.1123338 | 22.10523367 | 1.128271989  | Up   | 0         | 0         | AAEL001832-PA (Fragment) OS=Aedes aegypti GN=AAEL001832 PE=4 SV=1                                       |
| CCG008622.1 | 3618  | 87   | 885 | 1.03326891 | 8.551153937 | 3.048903353  | Up   | 0         | 0         | AAEL007256-PA OS=Aedes aegypti GN=AAEL007256 PE=4 SV=1                                                  |
| CCG003171.1 | 1465  | 282  | 886 | 8.27130728 | 21.1420022  | 1.35392474   | Up   | 5.45E-13  | 1.40E-12  | Hypothetical conserved protein OS=Aedes aegypti PE=2 SV=1                                               |
| CCG014000.1 | 17550 | 2108 | 886 | 5.16126499 | 1.764845198 | -1.548183059 | Down | 1.98E-175 | 1.16E-174 | Calcium-activated potassium channel alpha chain OS=Culex quinquefasciatus GN=CpipJ_CPIJ005769 PE=4 SV=1 |
| CCG018419.1 | 1096  | 9138 | 886 | 358.264083 | 28.26006681 | -3.664186635 | Down | 0         | 0         | AAEL000445-PA OS=Aedes aegypti GN=AAEL000445 PE=4 SV=1                                                  |
| CCG007742.1 | 621   | 127  | 887 | 8.7876913  | 49.93235346 | 2.506418811  | Up   | 1.57E-13  | 4.66E-13  | -                                                                                                       |
| CCG017398.1 | 753   | 225  | 887 | 12.8395621 | 41.17927158 | 1.681322307  | Up   | 0         | 0         | AAEL006560-PA OS=Aedes aegypti GN=AAEL006560 PE=3 SV=1                                                  |
| CCG025658.1 | 6309  | 295  | 887 | 2.00920458 | 4.914882152 | 1.290532354  | Up   | 2.32E-13  | 6.61E-13  | Pol-like protein OS=Biomphalaria glabrata PE=4 SV=1                                                     |
| CCG006378.1 | 1882  | 100  | 888 | 2.28319525 | 16.49465982 | 2.85287288   | Up   | 0         | 0         | AAEL002496-PA OS=Aedes aegypti GN=AAEL002496 PE=4 SV=1                                                  |
| CCG026130.1 | 1341  | 60   | 889 | 1.9225832  | 23.17517379 | 3.591462217  | Up   | 0         | 0         | AAEL002157-PA OS=Aedes aegypti GN=AAEL002157 PE=4 SV=1                                                  |
| CCG012837.1 | 1572  | 154  | 889 | 4.20950326 | 19.76966161 | 2.231566272  | Up   | 1.82E-13  | 5.28E-13  | AAEL003514-PA OS=Aedes aegypti GN=AAEL003514 PE=4 SV=1                                                  |

|             |      |     |     |            |             |             |    |          |          |                                                                                                     |
|-------------|------|-----|-----|------------|-------------|-------------|----|----------|----------|-----------------------------------------------------------------------------------------------------|
| CCG008027.1 | 354  | 312 | 889 | 37.8716305 | 87.79070071 | 1.212950594 | Up | 9.28E-14 | 2.94E-13 | AAEL013700-PA OS=Aedes aegypti GN=AAEL013700 PE=4 SV=1                                              |
| CCG020774.1 | 2529 | 109 | 890 | 1.85199726 | 12.30243825 | 2.731790405 | Up | 0        | 0        | AAEL014046-PA OS=Aedes aegypti GN=AAEL014046 PE=4 SV=1                                              |
| CCG018043.1 | 660  | 237 | 890 | 15.4300411 | 47.14070656 | 1.611231481 | Up | 2.32E-13 | 6.61E-13 | AAEL012180-PA OS=Aedes aegypti GN=AAEL012180 PE=4 SV=1                                              |
| CCG003735.1 | 1427 | 269 | 890 | 8.10011115 | 21.80298972 | 1.428512367 | Up | 0        | 0        | AGAP003717-PA OS=Anopheles gambiae GN=AgaP_AGAP003717 PE=4 SV=3                                     |
| CCG027132.1 | 7674 | 302 | 890 | 1.6910164  | 4.054321909 | 1.26156999  | Up | 4.59E-13 | 1.20E-12 | AAEL000399-PA OS=Aedes aegypti GN=AAEL000399 PE=4 SV=1                                              |
| CCG015571.1 | 798  | 143 | 891 | 7.70009029 | 39.03236166 | 2.341723489 | Up | 0        | 0        | AAEL008461-PA OS=Aedes aegypti GN=AAEL008461 PE=2 SV=1                                              |
| CCG005627.1 | 3431 | 145 | 891 | 1.81597538 | 9.078351677 | 2.321685735 | Up | 0        | 0        | AGAP001132-PA OS=Anopheles gambiae GN=AgaP_AGAP001132 PE=4 SV=5                                     |
| CCG003858.1 | 1569 | 145 | 891 | 3.97107171 | 19.85202333 | 2.321685735 | Up | 0        | 0        | Uncharacterized protein OS=Anopheles darlingi GN=AND_12258 PE=3 SV=1                                |
| CCG018577.1 | 1780 | 275 | 891 | 6.63858259 | 17.49877787 | 1.398307017 | Up | 4.31E-13 | 1.14E-12 | AAEL003140-PA OS=Aedes aegypti GN=AAEL003140 PE=4 SV=1                                              |
| CCG007856.1 | 2688 | 54  | 892 | 0.86323128 | 11.60073768 | 3.748325602 | Up | 0        | 0        | DNA-directed RNA polymerase OS=Aedes aegypti GN=AAEL013134 PE=3 SV=1                                |
| CCG023247.1 | 403  | 174 | 892 | 18.5526894 | 77.37663246 | 2.060269608 | Up | 1.78E-13 | 5.20E-13 | -                                                                                                   |
| CCG004753.1 | 621  | 182 | 892 | 12.5933844 | 50.21382106 | 1.995418464 | Up | 0        | 0        | AAEL000206-PA OS=Aedes aegypti GN=AAEL000206 PE=4 SV=1                                              |
| CCG009905.1 | 3516 | 238 | 892 | 2.90864529 | 8.868823345 | 1.60839534  | Up | 6.86E-13 | 1.73E-12 | AAEL009048-PA OS=Aedes aegypti GN=AAEL009048 PE=4 SV=1                                              |
| CCG005395.1 | 4128 | 257 | 892 | 2.67519908 | 7.553968721 | 1.497588555 | Up | 4.14E-13 | 1.10E-12 | DNA-repair protein complementing XP-G cells OS=Culex quinquefasciatus GN=CpipJ_CPIJ004184 PE=4 SV=1 |
| CCG001760.1 | 1131 | 258 | 892 | 9.80211453 | 27.57098398 | 1.491985848 | Up | 1.69E-13 | 4.97E-13 | AAEL004520-PA OS=Aedes aegypti GN=AAEL004520 PE=4 SV=1                                              |

|             |      |      |     |            |             |              |      |           |           |                                                                                         |
|-------------|------|------|-----|------------|-------------|--------------|------|-----------|-----------|-----------------------------------------------------------------------------------------|
| CCG015134.1 | 1612 | 287  | 892 | 7.65031876 | 19.34415811 | 1.338306177  | Up   | 2.87E-13  | 7.98E-13  | AAEL003537-PA OS=Aedes aegypti GN=AAEL003537 PE=4 SV=1                                  |
| CCG006814.1 | 1050 | 75   | 893 | 3.06926676 | 29.73118205 | 3.276010878  | Up   | 0         | 0         | AAEL007077-PA OS=Aedes aegypti GN=AAEL007077 PE=4 SV=1                                  |
| CCG025740.1 | 1023 | 144  | 893 | 6.04852569 | 30.51587601 | 2.334904567  | Up   | 7.53E-14  | 2.44E-13  | AAEL004285-PA OS=Aedes aegypti GN=AAEL004285 PE=4 SV=1                                  |
| CCG000560.1 | 2509 | 276  | 893 | 4.72684207 | 12.44230417 | 1.396305112  | Up   | 0         | 0         | AAEL009415-PA OS=Aedes aegypti GN=AAEL009415 PE=4 SV=1                                  |
| CCG021447.1 | 2105 | 311  | 893 | 6.34849761 | 14.83028083 | 1.224058799  | Up   | 0         | 0         | AAEL003528-PA OS=Aedes aegypti GN=AAEL003528 PE=4 SV=1                                  |
| CCG023731.1 | 1131 | 316  | 894 | 12.0056907 | 27.63280233 | 1.202663477  | Up   | 3.23E-13  | 8.83E-13  | AAEL013363-PA OS=Aedes aegypti GN=AAEL013363 PE=4 SV=1                                  |
| CCG007062.1 | 1881 | 53   | 895 | 1.21073681 | 16.6335235  | 3.780136621  | Up   | 0         | 0         | AAEL006544-PA OS=Aedes aegypti GN=AAEL006544 PE=4 SV=1                                  |
| CCG025234.1 | 1309 | 145  | 895 | 4.75982545 | 23.90195394 | 2.328147986  | Up   | 0         | 0         | Uncharacterized protein OS=Anopheles darlingi GN=AND_07785 PE=4 SV=1                    |
| CCG022869.1 | 1636 | 2183 | 895 | 57.3367547 | 19.12448515 | -1.584039339 | Down | 8.91E-188 | 5.27E-187 | isocitrate dehydrogenase [NADP] OS=Culex quinquefasciatus GN=CpipJ_CPIJ003304 PE=3 SV=1 |
| CCG028454.1 | 1587 | 3411 | 895 | 92.3564995 | 19.7149702  | -2.227921964 | Down | 0         | 0         | AAEL003419-PA OS=Aedes aegypti GN=AAEL003419 PE=4 SV=1                                  |
| CCG022493.1 | 984  | 25   | 896 | 1.09171074 | 31.83192682 | 4.865811936  | Up   | 9.32E-12  | 2.08E-11  | Trypsin-like salivary secreted protein OS=Aedes albopictus PE=2 SV=1                    |
| CCG003709.1 | 1930 | 121  | 896 | 2.69395745 | 16.22933471 | 2.590804889  | Up   | 0         | 0         | Heat shock protein 70 BZ OS=Culex quinquefasciatus GN=CpipJ_CPIJ014283 PE=3 SV=1        |
| CCG024639.1 | 2181 | 232  | 896 | 4.57082917 | 14.36158459 | 1.651687131  | Up   | 2.91E-13  | 8.05E-13  | AAEL011825-PA OS=Aedes aegypti GN=AAEL011825 PE=4 SV=1                                  |
| CCG010481.1 | 2520 | 325  | 896 | 5.54173165 | 12.42960952 | 1.165372218  | Up   | 1.19E-13  | 3.66E-13  | AAEL013290-PA OS=Aedes aegypti GN=AAEL013290 PE=4 SV=1                                  |
| CCG022588.1 | 1924 | 340  | 896 | 7.59340425 | 16.27994594 | 1.10027719   | Up   | 8.86E-14  | 2.80E-13  | AAEL013883-PA OS=Aedes aegypti GN=AAEL013883 PE=4 SV=1                                  |
| CCG010279.1 | 1593 | 2003 | 896 | 54.0291139 | 19.66265913 | -1.45827858  | Down | 1.15E-152 | 6.57E-152 | Sterol carrier protein-X OS=Aedes aegypti PE=2 SV=1                                     |



|             |      |      |     |            |             |              |      |           |           |                                                                                                          |
|-------------|------|------|-----|------------|-------------|--------------|------|-----------|-----------|----------------------------------------------------------------------------------------------------------|
| CCG006752.1 | 2104 | 2031 | 896 | 41.4788645 | 14.8871749  | -1.478306398 | Down | 5.99E-158 | 3.44E-157 | AAEL006150-PA OS=Aedes aegypti GN=AAEL006150 PE=4 SV=1                                                   |
| CCG012242.1 | 4038 | 2334 | 896 | 24.8368897 | 7.75696285  | -1.67892072  | Down | 3.54E-218 | 2.14E-217 | AAEL002721-PA OS=Aedes aegypti GN=AAEL002721 PE=4 SV=1                                                   |
| CCG019648.1 | 2127 | 13   | 897 | 0.26262649 | 14.74263012 | 5.810837661  | Up   | 6.34E-08  | 1.22E-07  | Werner syndrome necase OS=Culex quinquefasciatus GN=CpipJ_CPIJ007658 PE=4 SV=1                           |
| CCG014578.1 | 1566 | 66   | 897 | 1.81098498 | 20.02399378 | 3.466883259  | Up   | 0         | 0         | AAEL012611-PA OS=Aedes aegypti GN=AAEL012611 PE=4 SV=1                                                   |
| CCG001955.1 | 4338 | 270  | 897 | 2.67446481 | 7.228578669 | 1.434461782  | Up   | 2.59E-13  | 7.27E-13  | Dihydropyridine-sensitive r-type calcium channel OS=Culex quinquefasciatus GN=CpipJ_CPIJ001909 PE=4 SV=1 |
| CCG019049.1 | 2201 | 261  | 898 | 5.09545694 | 14.26284986 | 1.484978842  | Up   | 8.02E-14  | 2.58E-13  | AAEL009147-PA OS=Aedes aegypti GN=AAEL009147 PE=4 SV=1                                                   |
| CCG001441.2 | 1371 | 1539 | 898 | 48.2351726 | 22.89754379 | -1.074892678 | Down | 1.84E-73  | 9.23E-73  | ATPase n2b OS=Culex quinquefasciatus GN=CpipJ_CPIJ009335 PE=4 SV=1                                       |
| CCG009184.1 | 834  | 4176 | 898 | 215.157808 | 37.64092631 | -2.515021158 | Down | 0         | 0         | AAEL003235-PA OS=Aedes aegypti GN=AAEL003235 PE=4 SV=1                                                   |
| CCG002927.1 | 2268 | 105  | 899 | 1.98933957 | 13.85691835 | 2.800244992  | Up   | 0         | 0         | AAEL000305-PA OS=Aedes aegypti GN=AAEL000305 PE=4 SV=1                                                   |
| CCG004812.2 | 2111 | 129  | 899 | 2.62581514 | 14.88748973 | 2.503263254  | Up   | 0         | 0         | AAEL008839-PA OS=Aedes aegypti GN=AAEL008839 PE=4 SV=1                                                   |
| CCG013924.1 | 945  | 151  | 899 | 6.86606341 | 33.25660404 | 2.27608577   | Up   | 0         | 0         | AAEL000487-PA OS=Aedes aegypti GN=AAEL000487 PE=4 SV=1                                                   |
| CCG020700.1 | 2103 | 109  | 900 | 2.2271522  | 14.96074612 | 2.74791007   | Up   | 0         | 0         | AAEL003490-PA OS=Aedes aegypti GN=AAEL003490 PE=4 SV=1                                                   |
| CCG024497.1 | 1743 | 135  | 900 | 3.32812058 | 18.05074532 | 2.439278798  | Up   | 1.90E-13  | 5.49E-13  | AAEL004891-PA OS=Aedes aegypti GN=AAEL004891 PE=4 SV=1                                                   |
| CCG001407.1 | 1251 | 247  | 900 | 8.48403233 | 25.1498394  | 1.567727163  | Up   | 0         | 0         | AAEL002989-PA OS=Aedes aegypti GN=AAEL002989 PE=4 SV=1                                                   |
| CCG023848.1 | 1403 | 149  | 901 | 4.56342869 | 22.45004089 | 2.298527979  | Up   | 2.33E-13  | 6.63E-13  | AAEL013869-PA OS=Aedes aegypti GN=AAEL013869 PE=4 SV=1                                                   |

|             |      |      |     |            |             |              |      |          |          |                                                                                               |
|-------------|------|------|-----|------------|-------------|--------------|------|----------|----------|-----------------------------------------------------------------------------------------------|
| CCG008770.1 | 2037 | 160  | 901 | 3.3751387  | 15.46264476 | 2.195768405  | Up   | 4.24E-14 | 1.44E-13 | AAEL010432-PA OS=Aedes aegypti GN=AAEL010432 PE=4 SV=1                                        |
| CCG012550.1 | 726  | 178  | 901 | 10.5352793 | 43.38485864 | 2.041963069  | Up   | 1.15E-13 | 3.58E-13 | AAEL002774-PA OS=Aedes aegypti GN=AAEL002774 PE=4 SV=1                                        |
| CCG000305.1 | 3267 | 316  | 901 | 4.15624002 | 9.641079698 | 1.213915751  | Up   | 3.23E-13 | 8.83E-13 | AAEL013386-PA OS=Aedes aegypti GN=AAEL013386 PE=4 SV=1                                        |
| CCG015612.1 | 690  | 273  | 902 | 17.0010689 | 45.69908065 | 1.426539686  | Up   | 1.53E-14 | 5.41E-14 | AAEL012368-PA OS=Aedes aegypti GN=AAEL012368 PE=4 SV=1                                        |
| CCG024783.1 | 1707 | 354  | 902 | 8.91112247 | 18.47238761 | 1.051691277  | Up   | 0        | 0        | AAEL010516-PA OS=Aedes aegypti GN=AAEL010516 PE=4 SV=1                                        |
| CCG013101.1 | 3918 | 1518 | 902 | 16.6483045 | 8.04807699  | -1.048659248 | Down | 1.14E-69 | 5.62E-69 | AAEL005284-PA OS=Aedes aegypti GN=AAEL005284 PE=4 SV=1                                        |
| CCG008547.1 | 2092 | 178  | 904 | 3.65612465 | 15.10625344 | 2.046758735  | Up   | 1.15E-13 | 3.57E-13 | AAEL000452-PA OS=Aedes aegypti GN=AAEL000452 PE=4 SV=1                                        |
| CCG006293.1 | 1026 | 211  | 904 | 8.83685575 | 30.80144464 | 1.801392978  | Up   | 1.30E-13 | 3.98E-13 | AAEL011551-PA OS=Aedes aegypti GN=AAEL011551 PE=4 SV=1                                        |
| CCG024870.1 | 1753 | 211  | 904 | 5.17205591 | 18.02754261 | 1.801392978  | Up   | 1.30E-13 | 3.97E-13 | AAEL004866-PA OS=Aedes aegypti GN=AAEL004866 PE=4 SV=1                                        |
| CCG002084.1 | 2577 | 315  | 904 | 5.25241226 | 12.26320613 | 1.223284148  | Up   | 4.28E-13 | 1.13E-12 | AAEL001350-PA OS=Aedes aegypti GN=AAEL001350 PE=4 SV=1                                        |
| CCG007780.1 | 627  | 1684 | 904 | 115.408346 | 50.40236396 | -1.195184257 | Down | 6.81E-95 | 3.57E-94 | AAEL003590-PA OS=Aedes aegypti GN=AAEL003590 PE=4 SV=1                                        |
| CCG021483.1 | 2025 | 71   | 905 | 1.50659316 | 15.62332863 | 3.374340066  | Up   | 0        | 0        | AAEL013487-PA OS=Aedes aegypti GN=AAEL013487 PE=4 SV=1                                        |
| CCG014521.1 | 1632 | 75   | 905 | 1.97471207 | 19.38556402 | 3.295268495  | Up   | 0        | 0        | AAEL007573-PA OS=Aedes aegypti GN=AAEL007573 PE=4 SV=1                                        |
| CCG026502.1 | 4326 | 130  | 905 | 1.29127728 | 7.313277966 | 2.501719373  | Up   | 0        | 0        | DNA topoisomerase z-binding protein 1 OS=Culex quinquefasciatus GN=CpipJ_CPIJ010004 PE=4 SV=1 |
| CCG002605.1 | 1514 | 3559 | 905 | 101.010096 | 20.89646003 | -2.273169032 | Down | 0        | 0        | AAEL014820-PA OS=Aedes aegypti GN=AAEL014820 PE=4 SV=1                                        |
| CCG009319.3 | 1966 | 173  | 906 | 3.78116179 | 16.10996885 | 2.091052216  | Up   | 3.60E-13 | 9.69E-13 | AAEL010581-PA OS=Aedes aegypti GN=AAEL010581 PE=4 SV=1                                        |

|             |      |      |     |            |             |              |      |          |          |                                                                               |
|-------------|------|------|-----|------------|-------------|--------------|------|----------|----------|-------------------------------------------------------------------------------|
| CCG022055.1 | 1590 | 180  | 906 | 4.86449826 | 19.91962186 | 2.033827348  | Up   | 3.32E-13 | 9.06E-13 | Serine/threonine-protein phosphatase OS=Aedes aegypti GN=AAEL004040 PE=3 SV=1 |
| CCG000364.1 | 1042 | 135  | 907 | 5.56709613 | 30.42913343 | 2.450456347  | Up   | 1.90E-13 | 5.49E-13 | AAEL009177-PA OS=Aedes aegypti GN=AAEL009177 PE=4 SV=1                        |
| CCG000925.1 | 1092 | 137  | 908 | 5.39089161 | 29.06787116 | 2.430829608  | Up   | 2.90E-13 | 8.04E-13 | AAEL013314-PA OS=Aedes aegypti GN=AAEL013314 PE=4 SV=1                        |
| CCG012806.1 | 1926 | 169  | 908 | 3.77044919 | 16.48084907 | 2.127982255  | Up   | 0        | 0        | AAEL007896-PA (Fragment) OS=Aedes aegypti GN=AAEL007896 PE=4 SV=1             |
| CCG008922.1 | 2052 | 179  | 908 | 3.74833455 | 15.46886711 | 2.045045914  | Up   | 0        | 0        | AAEL000583-PA OS=Aedes aegypti GN=AAEL000583 PE=3 SV=1                        |
| CCG011080.1 | 1290 | 214  | 908 | 7.12831256 | 24.60629094 | 1.787394705  | Up   | 0        | 0        | AAEL013995-PA OS=Aedes aegypti GN=AAEL013995 PE=4 SV=1                        |
| CCG021486.1 | 1971 | 7245 | 908 | 157.948111 | 16.10457398 | -3.293908283 | Down | 0        | 0        | AAEL004680-PA OS=Aedes aegypti GN=AAEL004680 PE=4 SV=1                        |
| CCG004331.1 | 2304 | 22   | 909 | 0.41030129 | 13.79213263 | 5.071018069  | Up   | 8.38E-11 | 1.80E-10 | AAEL000116-PA OS=Aedes aegypti GN=AAEL000116 PE=4 SV=1                        |
| CCG028432.1 | 2387 | 100  | 909 | 1.80015646 | 13.31255701 | 2.886593498  | Up   | 0        | 0        | AAEL014827-PA OS=Aedes aegypti GN=AAEL014827 PE=4 SV=1                        |
| CCG025246.1 | 2903 | 179  | 909 | 2.64952893 | 10.94628784 | 2.046633911  | Up   | 0        | 0        | -                                                                             |
| CCG008048.1 | 276  | 8182 | 909 | 1273.83467 | 115.1343246 | -3.467788134 | Down | 0        | 0        | AAEL001390-PA OS=Aedes aegypti GN=AAEL001390 PE=4 SV=1                        |
| CCG005728.1 | 3837 | 326  | 910 | 3.65080362 | 8.290860532 | 1.183307785  | Up   | 6.17E-13 | 1.58E-12 | AAEL002382-PA OS=Aedes aegypti GN=AAEL002382 PE=4 SV=1                        |
| CCG028063.1 | 1590 | 351  | 910 | 9.4857716  | 20.00756721 | 1.076708719  | Up   | 4.44E-15 | 1.60E-14 | AAEL000905-PA (Fragment) OS=Aedes aegypti GN=AAEL000905 PE=4 SV=2             |
| CCG011877.1 | 582  | 4412 | 910 | 325.743074 | 54.65984856 | -2.575181137 | Down | 0        | 0        | AAEL003603-PA OS=Aedes aegypti GN=AAEL003603 PE=4 SV=1                        |
| CCG010865.1 | 2757 | 4820 | 910 | 75.1230036 | 11.5386405  | -2.702781492 | Down | 0        | 0        | AAEL012110-PA OS=Aedes aegypti GN=AAEL012110 PE=4 SV=1                        |
| CCG011754.1 | 1220 | 31   | 911 | 1.09185391 | 26.10409028 | 4.579424137  | Up   | 2.40E-13 | 6.76E-13 | AAEL008256-PA OS=Aedes aegypti GN=AAEL008256 PE=3 SV=1                        |

|             |       |      |     |            |             |              |      |           |           |                                                                                             |
|-------------|-------|------|-----|------------|-------------|--------------|------|-----------|-----------|---------------------------------------------------------------------------------------------|
| CCG020318.1 | 1719  | 66   | 911 | 1.64979784 | 18.52646314 | 3.489226328  | Up   | 0         | 0         | AAEL004740-FA OS=Aedes aegypti GN=AAEL004740 PE=4 SV=1                                      |
| CCG008962.1 | 3000  | 1944 | 911 | 27.844388  | 10.61566338 | -1.391192056 | Down | 4.25E-138 | 2.38E-137 | Heat shock protein 70 BZ OS=Culex quinquefasciatus GN=CpipJ_CPIJ014283 PE=3 SV=1            |
| CCG010285.1 | 3346  | 184  | 912 | 2.36295014 | 9.528376693 | 2.011641262  | Up   | 3.33E-13  | 9.08E-13  | AAEL014497-FA OS=Aedes aegypti GN=AAEL014497 PE=4 SV=1                                      |
| CCG012760.1 | 2835  | 219  | 912 | 3.31935516 | 11.24583718 | 1.760416158  | Up   | 4.32E-13  | 1.14E-12  | AAEL008333-FA OS=Aedes aegypti GN=AAEL008333 PE=4 SV=1                                      |
| CCG023051.1 | 1912  | 248  | 912 | 5.57348022 | 16.67465921 | 1.581006908  | Up   | 5.86E-14  | 1.95E-13  | AAEL000214-FA OS=Aedes aegypti GN=AAEL000214 PE=4 SV=1                                      |
| CCG013113.1 | 1023  | 342  | 912 | 14.3652485 | 31.16514997 | 1.117350703  | Up   | 1.09E-13  | 3.41E-13  | Putative arsenite-translocating ATPase OS=Glossina morsitans morsitans PE=2 SV=1            |
| CCG006039.1 | 2822  | 361  | 912 | 5.49683706 | 11.29764295 | 1.039348191  | Up   | 1.35E-13  | 4.08E-13  | AAEL010837-FA OS=Aedes aegypti GN=AAEL010837 PE=4 SV=1                                      |
| CCG018866.2 | 22677 | 1650 | 912 | 3.12651859 | 1.405915616 | -1.153047091 | Down | 6.57E-88  | 3.40E-87  | AAEL004669-FA OS=Aedes aegypti GN=AAEL004669 PE=4 SV=1                                      |
| CCG015007.1 | 45084 | 1988 | 912 | 1.89477048 | 0.707167696 | -1.421898824 | Down | 6.60E-146 | 3.73E-145 | AAEL009685-FA OS=Aedes aegypti GN=AAEL009685 PE=3 SV=1                                      |
| CCG028605.1 | 2016  | 189  | 913 | 4.02841262 | 15.83179895 | 1.97454183   | Up   | 2.34E-13  | 6.64E-13  | AAEL002006-FA OS=Aedes aegypti GN=AAEL002006 PE=4 SV=1                                      |
| CCG019904.1 | 2352  | 198  | 913 | 3.61735011 | 13.57011339 | 1.907427634  | Up   | 0         | 0         | AAEL002386-FA OS=Aedes aegypti GN=AAEL002386 PE=4 SV=1                                      |
| CCG004188.3 | 2211  | 1502 | 913 | 29.1906564 | 14.43550732 | -1.015884844 | Down | 1.60E-65  | 7.83E-65  | AAEL014217-FA OS=Aedes aegypti GN=AAEL014217 PE=4 SV=1                                      |
| CCG010618.1 | 2493  | 136  | 914 | 2.34411709 | 12.81663256 | 2.450900718  | Up   | 1.70E-13  | 4.98E-13  | AAEL009919-FA OS=Aedes aegypti GN=AAEL009919 PE=4 SV=1                                      |
| CCG014005.1 | 1317  | 187  | 914 | 6.10124554 | 24.26109717 | 1.991469099  | Up   | 3.31E-13  | 9.03E-13  | AAEL006617-FA OS=Aedes aegypti GN=AAEL006617 PE=4 SV=1                                      |
| CCG011923.1 | 861   | 77   | 915 | 3.84282179 | 37.15078194 | 3.273154596  | Up   | 0         | 0         | Goodpasture antigen-binding protein OS=Culex quinquefasciatus GN=CpipJ_CPIJ000098 PE=4 SV=1 |
| CCG005302.1 | 1230  | 120  | 915 | 4.19216923 | 26.00554736 | 2.633050541  | Up   | 0         | 0         | AAEL012705-FA OS=Aedes aegypti GN=AAEL012705 PE=4 SV=1                                      |

|             |      |     |     |            |             |             |    |          |          |                                                                                          |
|-------------|------|-----|-----|------------|-------------|-------------|----|----------|----------|------------------------------------------------------------------------------------------|
| CCG003590.1 | 2004 | 87  | 916 | 1.86545255 | 15.9789329  | 3.098573496 | Up | 0        | 0        | AAEL006227-PA OS=Aedes aegypti GN=AAEL006227 PE=4 SV=1                                   |
| CCG010914.1 | 5808 | 119 | 916 | 0.88040606 | 5.513392136 | 2.646699229 | Up | 0        | 0        | AAEL008377-PA OS=Aedes aegypti GN=AAEL008377 PE=4 SV=1                                   |
| CCG024222.1 | 1521 | 83  | 917 | 2.34483101 | 21.07609454 | 3.168051696 | Up | 1.32E-13 | 4.02E-13 | AAEL014161-PA OS=Aedes aegypti GN=AAEL014161 PE=4 SV=1                                   |
| CCG000938.1 | 2353 | 93  | 917 | 1.6983363  | 13.62377382 | 3.003932316 | Up | 4.04E-14 | 1.39E-13 | AAEL008572-PA OS=Aedes aegypti GN=AAEL008572 PE=4 SV=1                                   |
| CCG006463.1 | 1865 | 134 | 917 | 3.08736967 | 17.18860043 | 2.477001937 | Up | 0        | 0        | Putative uncharacterized protein OS=Culex quinquefasciatus GN=CpipJ_CPIJ005688 PE=4 SV=1 |
| CCG022394.1 | 1317 | 194 | 917 | 6.32963441 | 24.34072878 | 1.943178285 | Up | 5.97E-13 | 1.53E-12 | AAEL007996-PA OS=Aedes aegypti GN=AAEL007996 PE=4 SV=1                                   |
| CCG008300.1 | 2553 | 83  | 918 | 1.39697923 | 12.57019118 | 3.169624116 | Up | 1.32E-13 | 4.01E-13 | AAEL006631-PA OS=Aedes aegypti GN=AAEL006631 PE=4 SV=1                                   |
| CCG001277.1 | 2967 | 233 | 919 | 3.37443484 | 10.82799338 | 1.68204811  | Up | 0        | 0        | AGAP010179-PA (Fragment) OS=Anopheles gambiae GN=AGAP010179 PE=4 SV=4                    |
| CCG027060.1 | 2685 | 144 | 920 | 2.30452208 | 11.97825498 | 2.377878253 | Up | 7.53E-14 | 2.44E-13 | Anoctamin OS=Aedes aegypti GN=AAEL012806 PE=3 SV=1                                       |
| CCG022772.1 | 1452 | 158 | 920 | 4.67577002 | 22.14987234 | 2.244022507 | Up | 0        | 0        | AAEL003868-PA OS=Aedes aegypti GN=AAEL003868 PE=4 SV=1                                   |
| CCG021113.1 | 1400 | 315 | 920 | 9.66819029 | 22.97258188 | 1.248595236 | Up | 4.28E-13 | 1.13E-12 | AAEL009445-PA OS=Aedes aegypti GN=AAEL009445 PE=4 SV=1                                   |
| CCG003850.1 | 2547 | 47  | 921 | 0.79292404 | 12.64097876 | 3.994781698 | Up | 0        | 0        | Putative uncharacterized protein OS=Culex quinquefasciatus GN=CpipJ_CPIJ015955 PE=4 SV=1 |
| CCG022334.1 | 699  | 101 | 921 | 6.20878855 | 46.06090545 | 2.891159067 | Up | 0        | 0        | AAEL011061-PA OS=Aedes aegypti GN=AAEL011061 PE=4 SV=1                                   |
| CCG016430.1 | 648  | 158 | 921 | 10.4771884 | 49.6860693  | 2.245589802 | Up | 0        | 0        | AAEL002375-PA OS=Aedes aegypti GN=AAEL002375 PE=4 SV=1                                   |
| CCG005241.1 | 1119 | 177 | 921 | 6.79682129 | 28.77262994 | 2.081765    | Up | 0        | 0        | AAEL002077-PA OS=Aedes aegypti GN=AAEL002077 PE=4 SV=1                                   |
| CCG028498.1 | 2790 | 354 | 921 | 5.45207385 | 11.53999029 | 1.081765    | Up | 0        | 0        | AAEL000569-PA OS=Aedes aegypti GN=AAEL000569 PE=4 SV=1                                   |

|             |      |     |     |            |             |             |    |          |          |                                                                                    |
|-------------|------|-----|-----|------------|-------------|-------------|----|----------|----------|------------------------------------------------------------------------------------|
| CCG024436.1 | 2797 | 211 | 922 | 3.24154952 | 11.52360786 | 1.829836956 | Up | 1.30E-13 | 3.98E-13 | AAEL013624-PA OS=Aedes aegypti GN=AAEL013624 PE=4 SV=1                             |
| CCG004437.1 | 1135 | 269 | 922 | 10.1840164 | 28.39782483 | 1.479473782 | Up | 0        | 0        | Splicing factor Uzar 38 kDa subunit OS=Acromyrmex echinator GN=G5I_01763 PE=4 SV=1 |
| CCG024458.1 | 1755 | 361 | 922 | 8.83878871 | 18.36554483 | 1.055081117 | Up | 1.35E-13 | 4.08E-13 | AAEL014698-PA OS=Aedes aegypti GN=AAEL014698 PE=4 SV=1                             |
| CCG006330.1 | 1416 | 132 | 923 | 4.00565323 | 22.78706883 | 2.508105922 | Up | 1.46E-13 | 4.36E-13 | AAEL005074-PA OS=Aedes aegypti GN=AAEL005074 PE=4 SV=1                             |
| CCG025763.1 | 3165 | 158 | 923 | 2.1450926  | 10.1947834  | 2.248719293 | Up | 0        | 0        | AAEL010501-PA OS=Aedes aegypti GN=AAEL010501 PE=4 SV=1                             |
| CCG014212.1 | 2378 | 208 | 923 | 3.75849655 | 13.56875082 | 1.852060323 | Up | 3.93E-13 | 1.05E-12 | AAEL003463-PA OS=Aedes aegypti GN=AAEL003463 PE=4 SV=1                             |
| CCG009840.1 | 657  | 225 | 923 | 14.7156625 | 49.1118561  | 1.73871885  | Up | 0        | 0        | AAEL010500-PA OS=Aedes aegypti GN=GST-2 PE=2 SV=1                                  |
| CCG015208.1 | 1788 | 318 | 923 | 7.64226824 | 18.04613505 | 1.239617086 | Up | 1.20E-13 | 3.69E-13 | AAEL015320-PA (Fragment) OS=Aedes aegypti GN=AAEL015320 PE=4 SV=1                  |
| CCG027346.1 | 588  | 37  | 924 | 2.70387786 | 54.93443493 | 4.34460888  | Up | 5.17E-14 | 1.74E-13 | AAEL003950-PA OS=Aedes aegypti GN=AAEL003950 PE=4 SV=1                             |
| CCG022822.1 | 624  | 196 | 924 | 13.4969038 | 51.76514061 | 1.939352401 | Up | 7.93E-14 | 2.55E-13 | Subolesin-like protein OS=Aedes albopictus PE=2 SV=1                               |
| CCG012500.1 | 2480 | 126 | 925 | 2.18313974 | 13.03887339 | 2.578342836 | Up | 1.34E-13 | 4.06E-13 | Zinc finger protein z6 OS=Culex quinquefasciatus GN=CpipJ_CPIJ016622 PE=4 SV=1     |
| CCG024841.1 | 2699 | 197 | 925 | 3.13636077 | 11.98088404 | 1.93357094  | Up | 0        | 0        | -                                                                                  |
| CCG014247.1 | 1538 | 224 | 925 | 6.25827084 | 21.0249714  | 1.748267837 | Up | 2.04E-13 | 5.88E-13 | AAEL008550-PA OS=Aedes aegypti GN=AAEL008550 PE=4 SV=1                             |
| CCG024463.1 | 1672 | 245 | 925 | 6.2964025  | 19.33995575 | 1.61898482  | Up | 3.40E-13 | 9.24E-13 | AAEL009149-PA OS=Aedes aegypti GN=AAEL009149 PE=4 SV=1                             |
| CCG010260.1 | 2712 | 58  | 926 | 0.91896925 | 11.93634377 | 3.699200592 | Up | 0        | 0        | AAEL002918-PA OS=Aedes aegypti GN=AAEL002918 PE=4 SV=1                             |
| CCG001310.1 | 2730 | 169 | 926 | 2.66003119 | 11.8576426  | 2.156302151 | Up | 0        | 0        | XPA-binding protein z OS=Culex quinquefasciatus GN=CpipJ_CPIJ005885 PE=4 SV=1      |

|             |      |      |     |            |             |              |      |           |           |                                                            |
|-------------|------|------|-----|------------|-------------|--------------|------|-----------|-----------|------------------------------------------------------------|
| CCG026872.2 | 2541 | 261  | 926 | 4.41365633 | 12.73961601 | 1.529275591  | Up   | 8.02E-14  | 2.58E-13  | AGAP005366-PA OS=Anopheles gambiae GN=AGAP005366 PE=4 SV=3 |
| CCG002735.1 | 2406 | 108  | 927 | 1.92881602 | 13.468962   | 2.80385123   | Up   | 0         | 0         | AAEL004526-PA OS=Aedes aegypti GN=AAEL004526 PE=4 SV=1     |
| CCG009959.1 | 3180 | 190  | 927 | 2.56737408 | 10.19066747 | 1.988883124  | Up   | 2.69E-13  | 7.52E-13  | AAEL008656-PA OS=Aedes aegypti GN=AAEL008656 PE=4 SV=1     |
| CCG000553.1 | 2200 | 326  | 927 | 6.3673334  | 14.73014662 | 1.210010578  | Up   | 6.17E-13  | 1.58E-12  | AAEL007307-PA OS=Aedes aegypti GN=AAEL007307 PE=4 SV=1     |
| CCG002004.1 | 693  | 1793 | 927 | 111.175663 | 46.76237023 | -1.24942104  | Down | 3.74E-108 | 2.01E-107 | AAEL000235-PA OS=Aedes aegypti GN=AAEL000235 PE=4 SV=1     |
| CCG025197.2 | 1659 | 172  | 928 | 4.45496947 | 19.55472022 | 2.134029444  | Up   | 1.35E-13  | 4.09E-13  | AAEL002341-PA OS=Aedes aegypti GN=AAEL002341 PE=4 SV=1     |
| CCG024622.1 | 1692 | 223  | 928 | 5.66326881 | 19.17333383 | 1.759394299  | Up   | 0         | 0         | AAEL005120-PA OS=Aedes aegypti GN=AAEL005120 PE=4 SV=1     |
| CCG009139.1 | 2085 | 252  | 928 | 5.19346433 | 15.55936731 | 1.583014275  | Up   | 5.42E-14  | 1.81E-13  | AAEL002798-PA OS=Aedes aegypti GN=AAEL002798 PE=4 SV=1     |
| CCG027868.1 | 1290 | 363  | 928 | 12.0914835 | 25.14827972 | 1.056468461  | Up   | 0         | 0         | AAEL003248-PA OS=Aedes aegypti GN=AAEL003248 PE=4 SV=1     |
| CCG024793.1 | 921  | 5939 | 928 | 277.087138 | 35.22397486 | -2.975710118 | Down | 0         | 0         | AAEL011088-PA OS=Aedes aegypti GN=AAEL011088 PE=4 SV=1     |
| CCG014819.1 | 730  | 137  | 929 | 8.06418307 | 44.4879988  | 2.463815907  | Up   | 2.90E-13  | 8.03E-13  | AAEL003174-PA OS=Aedes aegypti GN=AAEL003174 PE=4 SV=1     |
| CCG014479.1 | 1920 | 122  | 930 | 2.73036855 | 16.93291531 | 2.632662772  | Up   | 8.04E-14  | 2.58E-13  | Heat shock 70 Ab OS=Aedes aegypti GN=Hsp70Ab PE=3 SV=1     |
| CCG022240.1 | 1018 | 205  | 930 | 8.65304086 | 31.93634322 | 1.88392001   | Up   | 1.83E-13  | 5.31E-13  | AAEL012389-PA OS=Aedes aegypti GN=AAEL012389 PE=4 SV=1     |
| CCG016842.1 | 1359 | 304  | 930 | 9.6120672  | 23.92288256 | 1.315472596  | Up   | 0         | 0         | AAEL009636-PA OS=Aedes aegypti GN=AAEL009636 PE=4 SV=1     |
| CCG021490.1 | 354  | 0    | 932 | 0.001      | 92.03704506 | 16.48992704  | Up   | 4.44E-16  | 1.64E-15  | AAEL010229-PA OS=Aedes aegypti GN=AAEL010229 PE=4 SV=1     |
| CCG010419.1 | 981  | 302  | 932 | 13.2281956 | 33.2121447  | 1.328094609  | Up   | 4.59E-13  | 1.20E-12  | -                                                          |
| CCG021334.1 | 2157 | 117  | 933 | 2.33076446 | 15.12103488 | 2.697681755  | Up   | 9.44E-14  | 2.98E-13  | AAEL013400-PA OS=Aedes aegypti GN=AAEL013400 PE=3 SV=1     |

|             |       |      |     |            |             |              |      |           |           |                                                                                                                        |
|-------------|-------|------|-----|------------|-------------|--------------|------|-----------|-----------|------------------------------------------------------------------------------------------------------------------------|
| CCG023100.1 | 891   | 207  | 933 | 9.98286764 | 36.60614167 | 1.874559517  | Up   | 6.88E-15  | 2.47E-14  | DRE2 OS=Glossina morsitans morsitans PE=2 SV=1                                                                         |
| CCG024734.1 | 2763  | 3    | 934 | 0.04665552 | 11.81723869 | 7.984629443  | Up   | 5.28E-05  | 8.84E-05  | AAEL003429-PA OS=Aedes aegypti GN=AAEL003429 PE=4 SV=1                                                                 |
| CCG015367.1 | 1741  | 168  | 934 | 4.14641896 | 18.7541818  | 2.177274521  | Up   | 1.45E-13  | 4.33E-13  | AAEL006577-PA OS=Aedes aegypti GN=AAEL006577 PE=3 SV=1                                                                 |
| CCG006733.1 | 1263  | 263  | 934 | 8.9477753  | 25.85196398 | 1.530672954  | Up   | 1.40E-14  | 4.98E-14  | AAEL006346-PA OS=Aedes aegypti GN=AAEL006346 PE=4 SV=1                                                                 |
| CCG020695.1 | 1191  | 273  | 934 | 9.84948577 | 27.41480311 | 1.476834803  | Up   | 1.53E-14  | 5.42E-14  | Coractor required for Sp1 transcriptional activation subunit 9 OS=Culex quinquefasciatus GN=CpipJ_CPIJ007281 PE=4 SV=1 |
| CCG006074.1 | 2039  | 39   | 935 | 0.8218831  | 16.03040156 | 4.28573354   | Up   | 7.33E-14  | 2.38E-13  | AAEL007045-PA OS=Aedes aegypti GN=AAEL007045 PE=4 SV=1                                                                 |
| CCG003483.1 | 833   | 189  | 935 | 9.74943558 | 39.23888209 | 2.008893334  | Up   | 2.34E-13  | 6.64E-13  | AAEL004067-PA OS=Aedes aegypti GN=AAEL004067 PE=4 SV=1                                                                 |
| CCG001076.1 | 1432  | 220  | 935 | 6.60149554 | 22.82541116 | 1.789776045  | Up   | 4.61E-13  | 1.20E-12  | -                                                                                                                      |
| CCG020837.1 | 1263  | 163  | 936 | 5.54557937 | 25.9073215  | 2.223949769  | Up   | 1.80E-13  | 5.25E-13  | AAEL005191-PA OS=Aedes aegypti GN=AAEL005191 PE=4 SV=1                                                                 |
| CCG013409.1 | 1044  | 212  | 936 | 8.72565492 | 31.34190331 | 1.844757469  | Up   | 0         | 0         | Insulin-like peptide 6 splice variant A OS=Aedes aegypti PE=2 SV=1                                                     |
| CCG006401.1 | 10126 | 2045 | 936 | 8.67796833 | 3.231379326 | -1.425207204 | Down | 1.47E-150 | 8.36E-150 | AAEL008485-PA OS=Aedes aegypti GN=AAEL008485 PE=4 SV=1                                                                 |
| CCG004374.1 | 1966  | 83   | 937 | 1.8140834  | 16.66119295 | 3.19917901   | Up   | 1.32E-13  | 4.02E-13  | AAEL000429-PA OS=Aedes aegypti GN=AAEL000429 PE=4 SV=1                                                                 |
| CCG008795.2 | 1717  | 148  | 937 | 3.70385598 | 19.07740555 | 2.364765076  | Up   | 0         | 0         | AAEL011816-PA OS=Aedes aegypti GN=AAEL011816 PE=4 SV=1                                                                 |
| CCG019214.1 | 1875  | 277  | 937 | 6.34806213 | 17.46981618 | 1.460476275  | Up   | 0         | 0         | AAEL011778-PA OS=Aedes aegypti GN=AAEL011778 PE=4 SV=1                                                                 |
| CCG021093.1 | 1875  | 102  | 938 | 2.33755356 | 17.48846059 | 2.903331974  | Up   | 0         | 0         | AAEL008400-PA OS=Aedes aegypti GN=AAEL008400 PE=4 SV=1                                                                 |
| CCG012431.1 | 1947  | 362  | 938 | 7.98923674 | 16.84173786 | 1.075911429  | Up   | 1.06E-12  | 2.62E-12  | AAEL000070-PA OS=Aedes aegypti GN=AAEL000070 PE=4 SV=1                                                                 |
| CCG008203.1 | 1209  | 6445 | 938 | 229.065293 | 27.12230241 | -3.078207327 | Down | 0         | 0         | AAEL012950-PA OS=Aedes aegypti GN=AAEL012950 PE=2 SV=1                                                                 |



|             |      |      |     |            |             |              |      |           |           |                                                                                               |
|-------------|------|------|-----|------------|-------------|--------------|------|-----------|-----------|-----------------------------------------------------------------------------------------------|
| CCG024289.1 | 1812 | 31   | 940 | 0.73513343 | 18.13508839 | 4.62463384   | Up   | 2.40E-13  | 6.77E-13  | AAEL004302-PA OS=Aedes aegypti GN=AAEL004562 PE=4 SV=1                                        |
| CCG025047.1 | 1296 | 79   | 940 | 2.61929709 | 25.35554025 | 3.275049402  | Up   | 0         | 0         | AAEL013471-PA OS=Aedes aegypti GN=AAEL013471 PE=4 SV=1                                        |
| CCG001190.1 | 2178 | 135  | 940 | 2.6634133  | 15.0875942  | 2.502014553  | Up   | 1.90E-13  | 5.48E-13  | AAEL004243-PA OS=Aedes aegypti GN=AAEL004243 PE=4 SV=1                                        |
| CCG015615.1 | 1899 | 75   | 941 | 1.69706693 | 17.32266374 | 3.351545426  | Up   | 0         | 0         | AAEL012360-PA OS=Aedes aegypti GN=AAEL012360 PE=4 SV=1                                        |
| CCG023684.1 | 2954 | 97   | 941 | 1.41098993 | 11.13599812 | 2.980451274  | Up   | 3.62E-14  | 1.25E-13  | Ubiquitin carboxyl-terminal hydrolase OS=Culex quinquefasciatus GN=CpipJ_CPIJ010867 PE=3 SV=1 |
| CCG018660.1 | 2520 | 20   | 942 | 0.34102964 | 13.06773679 | 5.259968359  | Up   | 3.69E-10  | 7.72E-10  | AAEL004302-PA OS=Aedes aegypti GN=AAEL004302 PE=4 SV=1                                        |
| CCG020469.1 | 981  | 217  | 942 | 9.50502794 | 33.56849819 | 1.820345221  | Up   | 1.47E-13  | 4.37E-13  | AAEL002644-PA OS=Aedes aegypti GN=AAEL002644 PE=4 SV=1                                        |
| CCG023270.1 | 885  | 239  | 942 | 11.604256  | 37.2098268  | 1.681029645  | Up   | 6.72E-13  | 1.70E-12  | Proteasome subunit beta type OS=Aedes aegypti GN=AAEL006174 PE=3 SV=1                         |
| CCG002796.1 | 4108 | 321  | 942 | 3.35766427 | 8.016235813 | 1.255466966  | Up   | 0         | 0         | AAEL006087-PA OS=Aedes aegypti GN=AAEL006087 PE=4 SV=1                                        |
| CCG002440.1 | 3324 | 175  | 943 | 2.26224535 | 9.917465402 | 2.132216053  | Up   | 3.55E-13  | 9.58E-13  | AAEL011147-PA OS=Aedes aegypti GN=AAEL011147 PE=4 SV=1                                        |
| CCG018844.1 | 4668 | 256  | 943 | 2.35652358 | 7.062051199 | 1.583427164  | Up   | 0         | 0         | AAEL006790-PA OS=Aedes aegypti GN=AAEL006790 PE=4 SV=1                                        |
| CCG019683.1 | 3987 | 314  | 943 | 3.38412257 | 8.268285678 | 1.288806416  | Up   | 4.97E-14  | 1.68E-13  | Putative uncharacterized protein OS=Culex quinquefasciatus GN=CpipJ_CPIJ015044 PE=4 SV=1      |
| CCG014192.1 | 2229 | 2447 | 943 | 47.1722479 | 14.78943697 | -1.673371222 | Down | 1.46E-227 | 8.89E-227 | AAEL005644-PA OS=Aedes aegypti GN=CLIFE12 PE=3 SV=1                                           |
| CCG008409.1 | 3712 | 233  | 944 | 2.69718431 | 8.890251421 | 1.720770109  | Up   | 0         | 0         | AAEL003089-PA OS=Aedes aegypti GN=AAEL003089 PE=4 SV=1                                        |
| CCG005734.1 | 1611 | 339  | 944 | 9.04204844 | 20.484552   | 1.17981479   | Up   | 1.30E-13  | 3.98E-13  | AAEL002384-PA OS=Aedes aegypti GN=AAEL002384 PE=4 SV=1                                        |

|             |       |      |     |            |             |              |      |          |          |                                                                   |
|-------------|-------|------|-----|------------|-------------|--------------|------|----------|----------|-------------------------------------------------------------------|
| CCG024231.1 | 1566  | 165  | 945 | 4.52746246 | 21.09551185 | 2.220161509  | Up   | 1.31E-14 | 4.67E-14 | AAEL005476-PA OS=Aedes aegypti GN=AAEL005476 PE=4 SV=1            |
| CCG016094.1 | 13783 | 194  | 945 | 0.60481234 | 2.396834619 | 1.986570881  | Up   | 5.97E-13 | 1.53E-12 | AAEL006715-PA OS=Aedes aegypti GN=AAEL006715 PE=4 SV=1            |
| CCG025434.1 | 963   | 64   | 946 | 2.85572483 | 34.34115247 | 3.588009577  | Up   | 0        | 0        | AAEL008942-PA OS=Aedes aegypti GN=AAEL008942 PE=4 SV=1            |
| CCG011602.1 | 2862  | 227  | 946 | 3.40815156 | 11.55504187 | 1.76146109   | Up   | 0        | 0        | AAEL005025-PA OS=Aedes aegypti GN=AAEL005025 PE=4 SV=1            |
| CCG003440.1 | 2027  | 2846 | 946 | 60.3314577 | 16.31501225 | -1.886710369 | Down | 0        | 0        | AAEL014895-PA OS=Aedes aegypti GN=CYP6BB2 PE=3 SV=1               |
| CCG014810.1 | 939   | 96   | 947 | 4.39307191 | 35.25611087 | 3.004571319  | Up   | 0        | 0        | AAEL006727-PA OS=Aedes aegypti GN=AAEL006727 PE=4 SV=1            |
| CCG020186.1 | 870   | 3742 | 947 | 184.819249 | 38.05228518 | -2.280060024 | Down | 0        | 0        | AAEL010330-PA OS=Aedes aegypti GN=AAEL010330 PE=4 SV=1            |
| CCG021603.1 | 3000  | 94   | 948 | 1.34638502 | 11.04681546 | 3.036467601  | Up   | 0        | 0        | AAEL004946-PA (Fragment) OS=Aedes aegypti GN=AAEL004946 PE=4 SV=1 |
| CCG007523.1 | 1734  | 107  | 948 | 2.65153495 | 19.11213747 | 2.849589466  | Up   | 0        | 0        | AAEL000299-PA (Fragment) OS=Aedes aegypti GN=AAEL000299 PE=4 SV=1 |
| CCG024234.1 | 411   | 219  | 948 | 22.8962819 | 80.63368949 | 1.816269393  | Up   | 4.32E-13 | 1.14E-12 | AAEL010634-PA OS=Aedes aegypti GN=AAEL010634 PE=4 SV=1            |
| CCG011947.1 | 2334  | 227  | 948 | 4.17914728 | 14.19899159 | 1.764507965  | Up   | 0        | 0        | AAEL009424-PA OS=Aedes aegypti GN=AAEL009424 PE=4 SV=1            |
| CCG012888.1 | 1971  | 263  | 948 | 5.73365814 | 16.81402658 | 1.552137463  | Up   | 1.40E-14 | 4.98E-14 | AAEL009502-PA OS=Aedes aegypti GN=AAEL009502 PE=4 SV=1            |
| CCG016883.1 | 714   | 358  | 948 | 21.545049  | 46.41519101 | 1.107240675  | Up   | 1.30E-13 | 3.97E-13 | AAEL006699-PA OS=Aedes aegypti GN=AAEL006699 PE=4 SV=1            |
| CCG004015.1 | 7005  | 8787 | 948 | 53.9007934 | 4.730970218 | -3.510098526 | Down | 0        | 0        | AAEL002204-PA OS=Aedes aegypti GN=AAEL002204 PE=4 SV=1            |
| CCG017183.1 | 2334  | 167  | 949 | 3.07452686 | 14.21396943 | 2.208873188  | Up   | 1.62E-13 | 4.77E-13 | AAEL013597-PA OS=Aedes aegypti GN=AAEL013597 PE=4 SV=1            |
| CCG002470.1 | 960   | 177  | 949 | 7.92254482 | 34.55771318 | 2.124971931  | Up   | 0        | 0        | AAEL008755-PA OS=Aedes aegypti GN=AAEL008755 PE=4 SV=1            |

|             |       |      |     |            |             |              |      |           |           |                                                                                          |
|-------------|-------|------|-----|------------|-------------|--------------|------|-----------|-----------|------------------------------------------------------------------------------------------|
| CCG009367.1 | 2218  | 2735 | 949 | 52.9856737 | 14.95735106 | -1.824747637 | Down | 5.03E-287 | 3.15E-286 | AGAP004519-PA OS=Anopheles gambiae GN=AGAP004519 PE=4 SV=4                               |
| CCG009537.1 | 676   | 174  | 950 | 11.0602571 | 49.12775582 | 2.151153411  | Up   | 1.78E-13  | 5.20E-13  | AAEL006502-PA OS=Aedes aegypti GN=AAEL006502 PE=4 SV=1                                   |
| CCG021889.1 | 1131  | 119  | 951 | 4.52113034 | 29.3946253  | 2.700796971  | Up   | 0         | 0         | AAEL000013-PA OS=Aedes aegypti GN=AAEL000013 PE=4 SV=1                                   |
| CCG023593.1 | 2844  | 321  | 951 | 4.8499595  | 11.68963474 | 1.269185248  | Up   | 0         | 0         | AAEL003562-PA OS=Aedes aegypti GN=AAEL003562 PE=4 SV=1                                   |
| CCG017038.1 | 1394  | 70   | 952 | 2.15773416 | 23.87394511 | 3.46784795   | Up   | 0         | 0         | AAEL006298-PA (Fragment) OS=Aedes aegypti GN=AAEL006298 PE=4 SV=1                        |
| CCG010423.1 | 714   | 181  | 952 | 10.8928879 | 46.6110357  | 2.09728508   | Up   | 1.53E-13  | 4.55E-13  | AAEL014098-PA OS=Aedes aegypti GN=AAEL014098 PE=4 SV=1                                   |
| CCG027981.1 | 1870  | 318  | 952 | 7.30715273 | 17.7969409  | 1.284248012  | Up   | 1.20E-13  | 3.69E-13  | AAEL013982-PA OS=Aedes aegypti GN=AAEL013982 PE=4 SV=1                                   |
| CCG001259.1 | 16478 | 1651 | 952 | 4.30531811 | 2.019679542 | -1.091993438 | Down | 1.11E-80  | 5.64E-80  | AAEL004242-PA OS=Aedes aegypti GN=AAEL004242 PE=4 SV=1                                   |
| CCG010322.1 | 1224  | 166  | 953 | 5.82759473 | 27.21833151 | 2.223606176  | Up   | 1.83E-13  | 5.31E-13  | AAEL014376-PA (Fragment) OS=Aedes aegypti GN=AAEL014376 PE=4 SV=1                        |
| CCG007366.2 | 2328  | 306  | 953 | 5.64808367 | 14.31066914 | 1.341257765  | Up   | 0         | 0         | AAEL007980-PA OS=Aedes aegypti GN=AAEL007980 PE=4 SV=1                                   |
| CCG019394.1 | 2340  | 327  | 953 | 6.00474496 | 14.2372811  | 1.245498782  | Up   | 6.36E-13  | 1.62E-12  | AAEL007353-PA OS=Aedes aegypti GN=AAEL007353 PE=3 SV=1                                   |
| CCG018386.1 | 1851  | 93   | 954 | 2.15893318 | 18.01739386 | 3.060999849  | Up   | 4.04E-14  | 1.39E-13  | AAEL006184-PA OS=Aedes aegypti GN=AAEL006184 PE=4 SV=1                                   |
| CCG027746.1 | 717   | 158  | 954 | 9.46892339 | 46.51352307 | 2.296377912  | Up   | 0         | 0         | Putative uncharacterized protein OS=Culex quinquefasciatus GN=CpipJ_CPIJ013057 PE=4 SV=1 |
| CCG024679.1 | 909   | 218  | 954 | 10.3051729 | 36.68888453 | 1.831974335  | Up   | 0         | 0         | Proteasome subunit alpha type OS=Aedes aegypti GN=AAEL006061 PE=3 SV=1                   |
| CCG022489.1 | 949   | 220  | 954 | 9.96137156 | 35.14246158 | 1.818798946  | Up   | 4.61E-13  | 1.20E-12  | AAEL011665-PA OS=Aedes aegypti GN=AAEL011665 PE=2 SV=1                                   |

|             |      |     |     |            |             |             |    |          |          |                                                                                                            |
|-------------|------|-----|-----|------------|-------------|-------------|----|----------|----------|------------------------------------------------------------------------------------------------------------|
| CCG024419.1 | 615  | 282 | 954 | 19.7031954 | 54.22796104 | 1.460607307 | Up | 5.45E-13 | 1.40E-12 | AAEL003550-PA OS=Aedes aegypti GN=AAEL003550 PE=2 SV=1                                                     |
| CCG019132.3 | 5214 | 111 | 955 | 0.91477571 | 6.402983183 | 2.80725426  | Up | 0        | 0        | AAEL002319-PA OS=Aedes aegypti GN=AAEL002319 PE=4 SV=1                                                     |
| CCG014529.1 | 1920 | 111 | 955 | 2.48418778 | 17.38810121 | 2.80725426  | Up | 0        | 0        | Zinc finger protein 136 (Fragment) OS=Culex quinquefasciatus GN=CpipJ_CPIJ009500 PE=4 SV=1                 |
| CCG004451.1 | 1106 | 135 | 955 | 5.24494952 | 30.18549215 | 2.52485453  | Up | 1.90E-13 | 5.48E-13 | AAEL002406-PA OS=Aedes aegypti GN=AAEL002406 PE=4 SV=1                                                     |
| CCG010556.1 | 1080 | 237 | 955 | 9.42946954 | 30.91217992 | 1.712926878 | Up | 2.32E-13 | 6.62E-13 | AAEL008257-PA OS=Aedes aegypti GN=AAEL008257 PE=2 SV=1                                                     |
| CCG004445.1 | 2571 | 312 | 955 | 5.21453022 | 12.98527978 | 1.316267908 | Up | 9.28E-14 | 2.93E-13 | AAEL001824-PA OS=Aedes aegypti GN=AAEL001824 PE=4 SV=1                                                     |
| CCG024792.1 | 1310 | 77  | 956 | 2.52570196 | 25.51153633 | 3.336393471 | Up | 0        | 0        | AAEL013179-PA OS=Aedes aegypti GN=AAEL013179 PE=4 SV=1                                                     |
| CCG019892.1 | 2877 | 267 | 956 | 3.98780644 | 11.61630608 | 1.54248408  | Up | 5.21E-13 | 1.35E-12 | AAEL006466-PA (Fragment) OS=Aedes aegypti GN=AAEL006466 PE=4 SV=1                                          |
| CCG008417.1 | 1890 | 274 | 956 | 6.22947475 | 17.68259926 | 1.505147929 | Up | 0        | 0        | AAEL003065-PA OS=Aedes aegypti GN=AAEL003065 PE=4 SV=1                                                     |
| CCG024406.1 | 1563 | 125 | 957 | 3.4364791  | 21.40439595 | 2.638904034 | Up | 2.35E-14 | 8.23E-14 | AAEL002744-PA OS=Aedes aegypti GN=AAEL002744 PE=4 SV=1                                                     |
| CCG022363.1 | 3068 | 226 | 957 | 3.1653064  | 10.90452114 | 1.784509356 | Up | 2.04E-14 | 7.17E-14 | AAEL006426-PA OS=Aedes aegypti GN=AAEL006426 PE=4 SV=1                                                     |
| CCG003610.1 | 2364 | 262 | 957 | 4.76229715 | 14.15189123 | 1.571265317 | Up | 0        | 0        | Ubiquitin conjugating enzyme 7 interacting protein OS=Culex quinquefasciatus GN=CpipJ_CPIJ017240 PE=4 SV=1 |
| CCG003990.1 | 1090 | 376 | 957 | 14.8225874 | 30.69272557 | 1.050099467 | Up | 3.71E-14 | 1.28E-13 | Probable ER retained protein OS=Aedes aegypti PE=2 SV=1                                                    |
| CCG019744.1 | 1085 | 382 | 957 | 15.1285149 | 30.8341667  | 1.02725949  | Up | 6.17E-13 | 1.57E-12 | AAEL008594-PA OS=Aedes aegypti GN=AAEL008594 PE=4 SV=1                                                     |
| CCG020699.1 | 1965 | 93  | 958 | 2.0336821  | 17.04327183 | 3.067036238 | Up | 4.04E-14 | 1.38E-13 | AAEL009724-PA OS=Aedes aegypti GN=AAEL009724 PE=4 SV=1                                                     |

|             |      |      |     |            |             |              |      |           |           |                                                                                          |
|-------------|------|------|-----|------------|-------------|--------------|------|-----------|-----------|------------------------------------------------------------------------------------------|
| CCG023101.1 | 1989 | 158  | 958 | 3.41338264 | 16.83762149 | 2.302414301  | Up   | 0         | 0         | AAEL001506-PA OS=Aedes aegypti GN=AAEL001506 PE=4 SV=1                                   |
| CCG024514.1 | 3309 | 197  | 958 | 2.55818607 | 10.12089125 | 1.98414323   | Up   | 0         | 0         | AAEL004911-PA OS=Aedes aegypti GN=AAEL004911 PE=4 SV=1                                   |
| CCG010140.1 | 1509 | 8    | 959 | 0.22780509 | 22.21669147 | 6.607700209  | Up   | 2.19E-06  | 3.96E-06  | AAEL002671-PA OS=Aedes aegypti GN=AAEL002671 PE=4 SV=1                                   |
| CCG014729.1 | 1854 | 98   | 959 | 2.27132362 | 18.08251749 | 2.992990365  | Up   | 0         | 0         | AAEL001124-PA OS=Aedes aegypti GN=AAEL001124 PE=4 SV=1                                   |
| CCG027261.1 | 2791 | 349  | 959 | 5.3731413  | 12.01181921 | 1.160616983  | Up   | 4.55E-14  | 1.54E-13  | AAEL001317-PA OS=Aedes aegypti GN=AAEL001317 PE=3 SV=1                                   |
| CCG009748.1 | 2328 | 2063 | 959 | 38.0784203 | 14.40076779 | -1.402827897 | Down | 2.75E-148 | 1.56E-147 | Putative uncharacterized protein OS=Culex quinquefasciatus GN=CpipJ_CPIJ011916 PE=4 SV=1 |
| CCG009928.1 | 1371 | 176  | 960 | 5.51617308 | 24.47844325 | 2.149772181  | Up   | 0         | 0         | AAEL013071-PA OS=Aedes aegypti GN=AAEL013071 PE=4 SV=1                                   |
| CCG001468.1 | 1545 | 1962 | 960 | 54.5673911 | 21.7216477  | -1.328905527 | Down | 5.70E-130 | 3.17E-129 | AAEL006514-PA OS=Aedes aegypti GN=AAEL006514 PE=4 SV=1                                   |
| CCG011677.1 | 2907 | 127  | 961 | 1.87724675 | 11.55655452 | 2.622021138  | Up   | 1.57E-13  | 4.67E-13  | AAEL004364-PA OS=Aedes aegypti GN=AAEL004364 PE=4 SV=1                                   |
| CCG017946.1 | 2371 | 256  | 961 | 4.63949897 | 14.16908645 | 1.610705825  | Up   | 0         | 0         | AAEL002258-PA OS=Aedes aegypti GN=AAEL002258 PE=4 SV=1                                   |
| CCG006482.1 | 2592 | 261  | 961 | 4.32681355 | 12.96099691 | 1.582799828  | Up   | 8.02E-14  | 2.58E-13  | AAEL008807-PA OS=Aedes aegypti GN=AAEL008807 PE=4 SV=1                                   |
| CCG008513.1 | 1823 | 129  | 962 | 3.04064496 | 18.44753826 | 2.600979032  | Up   | 0         | 0         | AAEL004232-PA OS=Aedes aegypti GN=AAEL004232 PE=4 SV=1                                   |
| CCG002399.1 | 1230 | 254  | 962 | 8.87342487 | 27.34135143 | 1.623521601  | Up   | 2.35E-13  | 6.67E-13  | AAEL005822-PA OS=Aedes aegypti GN=AAEL005822 PE=3 SV=1                                   |
| CCG020654.1 | 1135 | 297  | 962 | 11.2440627 | 29.62983459 | 1.397887167  | Up   | 2.44E-13  | 6.86E-13  | AAEL010083-PA OS=Aedes aegypti GN=IMD PE=4 SV=1                                          |
| CCG028231.1 | 2283 | 6197 | 962 | 116.637514 | 14.73055727 | -2.985147965 | Down | 0         | 0         | AAEL012556-PA OS=Aedes aegypti GN=AAEL012556 PE=4 SV=1                                   |
| CCG007505.1 | 7950 | 2327 | 963 | 12.5774305 | 4.23456862  | -1.570550304 | Down | 1.50E-197 | 8.96E-197 | -                                                                                        |
| CCG025222.1 | 3657 | 122  | 964 | 1.43349949 | 9.215143234 | 2.684465202  | Up   | 8.04E-14  | 2.58E-13  | Uncharacterized protein OS=Anopheles darlingi GN=AND_17442 PE=4 SV=1                     |

|             |       |      |     |            |             |              |      |           |           |                                                                                          |
|-------------|-------|------|-----|------------|-------------|--------------|------|-----------|-----------|------------------------------------------------------------------------------------------|
| CCG006643.1 | 1961  | 146  | 964 | 3.19917453 | 17.18499684 | 2.425377981  | Up   | 9.33E-15  | 3.34E-14  | AAEL007368-PA OS=Aedes aegypti GN=AAEL007368 PE=4 SV=1                                   |
| CCG022266.1 | 1867  | 203  | 965 | 4.67212433 | 18.06895398 | 1.951362419  | Up   | 9.28E-14  | 2.94E-13  | AAEL003277-PA OS=Aedes aegypti GN=AAEL003277 PE=3 SV=1                                   |
| CCG027653.1 | 1097  | 343  | 965 | 13.4353865 | 30.75181138 | 1.19463357   | Up   | 0         | 0         | AAEL013212-PA OS=Aedes aegypti GN=AAEL013212 PE=4 SV=1                                   |
| CCG023155.1 | 5906  | 55   | 966 | 0.40015838 | 5.717862405 | 3.836832869  | Up   | 0         | 0         | AAEL008123-PA OS=Aedes aegypti GN=AAEL008123 PE=4 SV=1                                   |
| CCG018364.1 | 499   | 78   | 966 | 6.71671202 | 67.6747402  | 3.332790364  | Up   | 0         | 0         | AAEL008719-PA OS=Aedes aegypti GN=AAEL008719 PE=4 SV=1                                   |
| CCG025512.1 | 1185  | 148  | 966 | 5.36668415 | 28.49763322 | 2.408739217  | Up   | 0         | 0         | AAEL009894-PA OS=Aedes aegypti GN=AAEL009894 PE=4 SV=1                                   |
| CCG022422.4 | 1851  | 167  | 966 | 3.87679399 | 18.24402775 | 2.23448829   | Up   | 1.62E-13  | 4.77E-13  | AAEL004874-PA OS=Aedes aegypti GN=AAEL004874 PE=4 SV=1                                   |
| CCG006880.1 | 10375 | 1838 | 966 | 7.61237323 | 3.254910396 | -1.225728469 | Down | 1.46E-107 | 7.80E-107 | AAEL007364-PA OS=Aedes aegypti GN=AAEL007364 PE=4 SV=1                                   |
| CCG006827.1 | 1856  | 172  | 967 | 3.98210903 | 18.21371425 | 2.193420529  | Up   | 1.35E-13  | 4.09E-13  | Glyz1n OS=Culex quinquefasciatus                                                         |
| CCG001015.1 | 9023  | 191  | 967 | 0.90958875 | 3.746498242 | 2.042256455  | Up   | 6.68E-14  | 2.19E-13  | CN_CpipJ_CPIJ015048 PE=4 SV=1                                                            |
| CCG004839.1 | 2175  | 240  | 967 | 4.74148796 | 15.54236949 | 1.712794688  | Up   | 0         | 0         | AAEL010101-PA (Fragment) OS=Aedes aegypti GN=AAEL010101 PE=4 SV=1                        |
| CCG027614.1 | 475   | 298  | 967 | 26.9578546 | 71.16769187 | 1.400516763  | Up   | 3.92E-13  | 1.05E-12  | Putative uncharacterized protein OS=Culex quinquefasciatus GN=CpipJ_CPIJ002917 PE=4 SV=1 |
| CCG009175.1 | 4005  | 1842 | 967 | 19.7628592 | 8.440612644 | -1.227372063 | Down | 5.11E-108 | 2.74E-107 | AAEL005319-PA OS=Aedes aegypti GN=AAEL005319 PE=4 SV=1                                   |
| CCG012095.1 | 957   | 286  | 968 | 12.8415299 | 35.36009605 | 1.461305104  | Up   | 0         | 0         | AAEL010099-PA OS=Aedes aegypti GN=AAEL010099 PE=4 SV=1                                   |
| CCG025958.1 | 962   | 378  | 968 | 16.8841577 | 35.17631176 | 1.058934017  | Up   | 1.08E-12  | 2.65E-12  | AAEL012276-PA OS=Aedes aegypti GN=AAEL012276 PE=2 SV=1                                   |
| CCG027654.1 | 1054  | 305  | 969 | 12.434316  | 32.1390609  | 1.370000627  | Up   | 5.30E-13  | 1.37E-12  | AAEL013207-PA OS=Aedes aegypti GN=AAEL013207 PE=4 SV=1                                   |
| CCG002902.1 | 1862  | 191  | 971 | 4.40774399 | 18.23012178 | 2.048211861  | Up   | 6.68E-14  | 2.20E-13  | AAEL012137-PA OS=Aedes aegypti GN=AAEL012137 PE=4 SV=1                                   |

|             |       |      |     |            |             |              |      |           |           |                                                                                          |
|-------------|-------|------|-----|------------|-------------|--------------|------|-----------|-----------|------------------------------------------------------------------------------------------|
| CCG014286.1 | 14727 | 1636 | 971 | 4.77344237 | 2.30491524  | -1.050316344 | Down | 3.92E-75  | 1.97E-74  | AAEL014378-PA OS=Aedes aegypti GN=AAEL014378 PE=4 SV=1                                   |
| CCG004665.1 | 3522  | 26   | 972 | 0.31720985 | 9.64776974  | 4.926685989  | Up   | 4.60E-12  | 1.05E-11  | Uncharacterized protein OS=Anopheles darlingi GN=AND_17442 PE=4 SV=1                     |
| CCG022393.1 | 693   | 38   | 972 | 2.35620478 | 49.0323882  | 4.379198194  | Up   | 4.26E-14  | 1.45E-13  | AAEL004492-PA OS=Aedes aegypti GN=AAEL004492 PE=4 SV=1                                   |
| CCG006785.1 | 1722  | 85   | 972 | 2.121038   | 19.73254647 | 3.217734771  | Up   | 0         | 0         | AAEL008878-PA OS=Aedes aegypti GN=AAEL008878 PE=4 SV=1                                   |
| CCG014790.1 | 2076  | 320  | 972 | 6.62346584 | 16.36774808 | 1.305197613  | Up   | 0         | 0         | AAEL002651-PA OS=Aedes aegypti GN=AAEL002651 PE=4 SV=1                                   |
| CCG006279.1 | 3554  | 358  | 972 | 4.32840883 | 9.560901807 | 1.14330993   | Up   | 1.30E-13  | 3.97E-13  | AAEL000965-PA OS=Aedes aegypti GN=AAEL000965 PE=4 SV=1                                   |
| CCG000345.1 | 3620  | 1643 | 972 | 19.5025619 | 9.386587023 | -1.054991058 | Down | 5.48E-76  | 2.76E-75  | AAEL003698-PA OS=Aedes aegypti GN=AAEL003698 PE=4 SV=1                                   |
| CCG022912.1 | 1667  | 1680 | 972 | 43.3048315 | 20.3835903  | -1.08711981  | Down | 1.76E-81  | 8.96E-81  | Putative uncharacterized protein OS=Culex quinquefasciatus GN=CpipJ_CPIJ012060 PE=4 SV=1 |
| CCG025281.3 | 2760  | 2219 | 972 | 34.5470439 | 12.31139312 | -1.488568245 | Down | 3.64E-174 | 2.12E-173 | AAEL002043-PA OS=Aedes aegypti GN=CYP305A5 PE=3 SV=1                                     |
| CCG027366.1 | 1104  | 332  | 973 | 12.9220579 | 30.81014792 | 1.253569767  | Up   | 0         | 0         | AAEL005259-PA OS=Aedes aegypti GN=AAEL005259 PE=4 SV=1                                   |
| CCG007122.1 | 1407  | 206  | 974 | 6.29123335 | 24.19997269 | 1.943590639  | Up   | 1.10E-13  | 3.43E-13  | AAEL007778-PA OS=Aedes aegypti GN=AAEL007778 PE=4 SV=1                                   |
| CCG013247.1 | 849   | 20   | 975 | 1.01224345 | 40.14643092 | 5.309643518  | Up   | 3.69E-10  | 7.72E-10  | AAEL008878-PA OS=Aedes aegypti GN=AAEL008878 PE=4 SV=1                                   |
| CCG008843.1 | 2493  | 100  | 975 | 1.72361551 | 13.67200957 | 2.987715423  | Up   | 0         | 0         | AAEL007512-PA OS=Aedes aegypti GN=AAEL007512 PE=4 SV=1                                   |
| CCG000140.1 | 2835  | 129  | 975 | 1.9552366  | 12.02268778 | 2.620344357  | Up   | 0         | 0         | AAEL008333-PA OS=Aedes aegypti GN=AAEL008333 PE=4 SV=1                                   |
| CCG027008.1 | 2292  | 223  | 975 | 4.1807377  | 14.8709947  | 1.830671713  | Up   | 0         | 0         | AAEL007638-PA OS=Aedes aegypti GN=AAEL007638 PE=4 SV=1                                   |
| CCG014509.1 | 2337  | 287  | 975 | 5.27698495 | 14.58464692 | 1.466664686  | Up   | 2.87E-13  | 7.98E-13  | -                                                                                        |

|             |      |      |     |            |             |              |      |           |           |                                                                                                   |
|-------------|------|------|-----|------------|-------------|--------------|------|-----------|-----------|---------------------------------------------------------------------------------------------------|
| CCG001108.1 | 8482 | 331  | 975 | 1.67684298 | 4.018429598 | 1.260884206  | Up   | 0         | 0         | Numo-associated kinase<br>OS=Culex quinquefasciatus<br>GN=CpipJ_CPIJ004075 PE=4<br>SV=1           |
| CCG001347.1 | 1519 | 393  | 975 | 11.1172519 | 22.43865691 | 1.01318611   | Up   | 1.08E-13  | 3.37E-13  | AAEL014141-PA OS=Aedes<br>aegypti GN=SRPN5 PE=3 SV=1                                              |
| CCG007110.2 | 2952 | 3103 | 975 | 45.1677122 | 11.54617881 | -1.967876369 | Down | 0         | 0         | AAEL005187-PA OS=Aedes<br>aegypti GN=AAEL005187 PE=4<br>SV=1                                      |
| CCG013858.1 | 1158 | 30   | 976 | 1.11320556 | 29.46397075 | 4.726159946  | Up   | 3.71E-13  | 9.95E-13  | AAEL006803-PA (Fragment)<br>OS=Aedes aegypti<br>GN=AAEL006803 PE=4 SV=1                           |
| CCG028535.1 | 4775 | 158  | 976 | 1.42182577 | 7.145398561 | 2.329269793  | Up   | 0         | 0         | AAEL004571-PA OS=Aedes<br>aegypti GN=AAEL004571 PE=4<br>SV=1                                      |
| CCG015427.1 | 2750 | 162  | 976 | 2.531308   | 12.40701023 | 2.293200538  | Up   | 0         | 0         | AAEL007729-PA OS=Aedes<br>aegypti GN=AAEL007729 PE=4<br>SV=1                                      |
| CCG001707.1 | 9325 | 1766 | 976 | 8.13775349 | 3.658903821 | -1.153219086 | Down | 5.61E-94  | 2.94E-93  | AAEL010047-PA OS=Aedes<br>aegypti GN=AAEL010047 PE=3<br>SV=1                                      |
| CCG027015.1 | 1992 | 2026 | 976 | 43.7031538 | 17.12815167 | -1.351367917 | Down | 1.25E-137 | 7.03E-137 | Putative uncharacterized protein<br>OS=Culex quinquefasciatus<br>GN=CpipJ_CPIJ001433 PE=4<br>SV=1 |
| CCG006374.1 | 1323 | 90   | 977 | 2.9231112  | 25.81574936 | 3.142674859  | Up   | 0         | 0         | histone acetyltransferase Tipou<br>OS=Culex quinquefasciatus<br>GN=CpipJ_CPIJ001206 PE=4<br>SV=1  |
| CCG020201.1 | 1194 | 319  | 977 | 11.4801887 | 28.60488811 | 1.317115342  | Up   | 0         | 0         | AAEL008084-PA OS=Aedes<br>aegypti GN=AAEL008084 PE=4<br>SV=1                                      |
| CCG013993.1 | 1965 | 31   | 978 | 0.67789403 | 17.39908126 | 4.681807548  | Up   | 2.40E-13  | 6.77E-13  | AAEL007692-PA OS=Aedes<br>aegypti GN=AAEL007692 PE=4<br>SV=1                                      |
| CCG022281.1 | 2922 | 191  | 978 | 2.80876773 | 11.7006142  | 2.058575031  | Up   | 6.68E-14  | 2.19E-13  | -                                                                                                 |
| CCG010759.1 | 1089 | 260  | 978 | 10.2590735 | 31.39503644 | 1.613636046  | Up   | 3.22E-13  | 8.81E-13  | AAEL005145-PA OS=Aedes<br>aegypti GN=AAEL005145 PE=4<br>SV=1                                      |
| CCG013323.1 | 3058 | 1880 | 978 | 26.4169722 | 11.18024679 | -1.240513088 | Down | 4.72E-112 | 2.55E-111 | AAEL007658-PA (Fragment)<br>OS=Aedes aegypti<br>GN=AAEL007658 PE=4 SV=1                           |
| CCG007310.1 | 6326 | 3669 | 978 | 24.9219027 | 5.404551799 | -2.20516733  | Down | 0         | 0         | AAEL014026-PA OS=Aedes<br>aegypti GN=AAEL014026 PE=4<br>SV=1                                      |



|             |       |      |     |            |             |              |      |          |          |                                                                   |
|-------------|-------|------|-----|------------|-------------|--------------|------|----------|----------|-------------------------------------------------------------------|
| CCG013161.1 | 1911  | 28   | 979 | 0.62959318 | 17.90902824 | 4.830123331  | Up   | 1.17E-12 | 2.85E-12 | AAEL004049-PA OS=Aedes aegypti GN=AAEL004049 PE=4 SV=1            |
| CCG027509.1 | 1737  | 49   | 979 | 1.21215717 | 19.70302416 | 4.022768409  | Up   | 0        | 0        | AAEL013842-PA OS=Aedes aegypti GN=AAEL013842 PE=4 SV=1            |
| CCG017134.1 | 1470  | 78   | 979 | 2.28002673 | 23.28173671 | 3.352076035  | Up   | 0        | 0        | AAEL009990-PA OS=Aedes aegypti GN=AAEL009990 PE=4 SV=1            |
| CCG004228.1 | 2909  | 113  | 979 | 1.66915779 | 11.76492023 | 2.817299291  | Up   | 1.42E-13 | 4.26E-13 | Ribonuclease P/MKP protein subunit POP1 OS=Culex quinquefasciatus |
| CCG015047.1 | 2198  | 129  | 979 | 2.5218816  | 15.57058824 | 2.626250998  | Up   | 0        | 0        | AAEL011072-PA OS=Aedes aegypti GN=AAEL011072 PE=4 SV=1            |
| CCG017857.1 | 1152  | 263  | 979 | 9.80993073 | 29.70846611 | 1.598559264  | Up   | 1.40E-14 | 4.97E-14 | Blood meal-induced protein OS=Aedes aegypti GN=MRRG PE=2 SV=2     |
| CCG000338.1 | 11411 | 355  | 980 | 1.33680272 | 3.002288251 | 1.167275928  | Up   | 2.28E-13 | 6.52E-13 | AAEL003652-PA OS=Aedes aegypti GN=AAEL003652 PE=3 SV=1            |
| CCG012140.1 | 2541  | 1618 | 980 | 27.3612871 | 13.48253099 | -1.02104475  | Down | 5.10E-71 | 2.53E-70 | AAEL011967-PA OS=Aedes aegypti GN=AAEL011967 PE=4 SV=1            |
| CCG002107.2 | 29945 | 1770 | 980 | 2.53987077 | 1.144067832 | -1.150582502 | Down | 7.59E-94 | 3.97E-93 | -                                                                 |
| CCG028516.1 | 4796  | 4405 | 980 | 39.4665723 | 7.143267564 | -2.465975161 | Down | 0        | 0        | AAEL002815-PA OS=Aedes aegypti GN=AAEL002815 PE=4 SV=1            |
| CCG026458.1 | 1692  | 121  | 982 | 3.07289473 | 20.28902352 | 2.723029181  | Up   | 0        | 0        | AAEL008000-PA OS=Aedes aegypti GN=AAEL008000 PE=4 SV=1            |
| CCG014478.2 | 1920  | 149  | 982 | 3.33463045 | 17.87970197 | 2.422723898  | Up   | 2.33E-13 | 6.63E-13 | Heat shock 70 Ab OS=Aedes aegypti GN=Hsp70Ab PE=3 SV=1            |
| CCG012849.1 | 4054  | 283  | 982 | 2.99961394 | 8.467939761 | 1.497234175  | Up   | 0        | 0        | AAEL006062-PA (Fragment) OS=Aedes aegypti GN=AAEL006062 PE=4 SV=1 |
| CCG017196.2 | 1637  | 138  | 984 | 3.62237225 | 21.01340522 | 2.536303252  | Up   | 1.49E-13 | 4.45E-13 | AAEL012787-PA OS=Aedes aegypti GN=AAEL012787 PE=4 SV=1            |
| CCG012324.1 | 666   | 158  | 984 | 10.1940211 | 51.65006658 | 2.341046961  | Up   | 0        | 0        | AAEL015143-PA OS=Aedes aegypti GN=AAEL015143 PE=2 SV=1            |
| CCG011480.1 | 2104  | 71   | 985 | 1.45002431 | 16.3659233  | 3.496545999  | Up   | 0        | 0        | AAEL000904-PA (Fragment) OS=Aedes aegypti GN=AAEL000904 PE=4 SV=1 |

|             |      |       |     |            |             |              |      |          |          |                                                                                          |
|-------------|------|-------|-----|------------|-------------|--------------|------|----------|----------|------------------------------------------------------------------------------------------|
| CCG022779.1 | 1017 | 83    | 985 | 3.50687116 | 33.85831133 | 3.271253687  | Up   | 1.32E-13 | 4.01E-13 | AAEL011023-PA OS=Aedes aegypti GN=AAEL011023 PE=4 SV=1                                   |
| CCG028171.1 | 771  | 291   | 985 | 16.2181489 | 44.6613523  | 1.461417775  | Up   | 6.00E-14 | 1.99E-13 | AAEL0006904-PA OS=Aedes aegypti GN=AAEL006904 PE=4 SV=1                                  |
| CCG002367.1 | 678  | 5788  | 985 | 366.827174 | 50.78746699 | -2.852556088 | Down | 0        | 0        | AAEL0009076-PA OS=Aedes aegypti GN=AAEL009078 PE=4 SV=1                                  |
| CCG026225.1 | 375  | 10785 | 985 | 1235.80957 | 91.82374032 | -3.750445438 | Down | 0        | 0        | AAEL007306-PA OS=Aedes aegypti GN=AAEL007306 PE=4 SV=1                                   |
| CCG019741.1 | 1245 | 121   | 987 | 4.17617501 | 27.71391098 | 2.730356241  | Up   | 0        | 0        | AAEL008599-PA (Fragment) OS=Aedes aegypti GN=AAEL008599 PE=3 SV=1                        |
| CCG018507.1 | 831  | 166   | 987 | 8.58360523 | 41.52084136 | 2.274180047  | Up   | 1.83E-13 | 5.32E-13 | Putative uncharacterized protein OS=Culex quinquefasciatus GN=CpipJ_CPIJ009943 PE=4 SV=1 |
| CCG024353.1 | 2479 | 190   | 987 | 3.29336409 | 13.91844259 | 2.07936387   | Up   | 2.69E-13 | 7.52E-13 | Zinc finger protein z6 OS=Culex quinquefasciatus GN=CpipJ_CPIJ016622 PE=4 SV=1           |
| CCG016675.1 | 2808 | 226   | 987 | 3.45839032 | 12.28768489 | 1.829040516  | Up   | 2.04E-14 | 7.16E-14 | AAEL000440-PA OS=Aedes aegypti GN=AAEL000440 PE=4 SV=1                                   |
| CCG003495.1 | 630  | 257   | 988 | 17.5289235 | 54.82345627 | 1.645055886  | Up   | 4.14E-13 | 1.10E-12 | AAEL0009317-PA OS=Aedes aegypti GN=AAEL009317 PE=2 SV=1                                  |
| CCG005864.1 | 2151 | 102   | 989 | 2.03761643 | 16.07333135 | 2.979714573  | Up   | 0        | 0        | AAEL013993-PA OS=Aedes aegypti GN=AAEL013993 PE=4 SV=1                                   |
| CCG018268.1 | 1080 | 130   | 989 | 5.17228287 | 32.01271827 | 2.629772102  | Up   | 0        | 0        | AAEL009739-PA OS=Aedes aegypti GN=AAEL009739 PE=4 SV=1                                   |
| CCG016004.1 | 1149 | 225   | 989 | 8.41443889 | 30.09028349 | 1.838358723  | Up   | 0        | 0        | AAEL001389-PA OS=Aedes aegypti GN=AAEL001389 PE=4 SV=1                                   |
| CCG014541.1 | 2298 | 47    | 990 | 0.8788414  | 15.06035422 | 4.099009067  | Up   | 0        | 0        | AAEL009799-PA OS=Aedes aegypti GN=AAEL009799 PE=4 SV=1                                   |
| CCG000783.1 | 1752 | 301   | 990 | 7.38235737 | 19.75382078 | 1.419978242  | Up   | 0        | 0        | AAEL000594-PA OS=Aedes aegypti GN=AAEL000594 PE=4 SV=1                                   |
| CCG016093.1 | 1136 | 319   | 990 | 12.0663251 | 30.46539965 | 1.336185305  | Up   | 0        | 0        | Splicing factor Uzar 56 kDa subunit OS=Acromyrmex echinator GN=G5I_01763 PE=4 SV=1       |

|             |      |     |     |            |             |             |    |          |          |                                                                                                   |
|-------------|------|-----|-----|------------|-------------|-------------|----|----------|----------|---------------------------------------------------------------------------------------------------|
| CCG008524.1 | 2004 | 17  | 991 | 0.36451372 | 17.28725164 | 5.56759161  | Up | 3.39E-09 | 6.90E-09 | Putative uncharacterized protein<br>OS=Culex quinquefasciatus<br>GN=CpipJ_CPIJ002013 PE=4<br>SV=1 |
| CCG018607.1 | 1095 | 30  | 991 | 1.177253   | 31.63803861 | 4.748163855 | Up | 3.71E-13 | 9.94E-13 | AAEL005000-PA OS=Aedes<br>aegypti GN=AAEL005000 PE=4<br>SV=1                                      |
| CCG021839.2 | 1779 | 402 | 991 | 9.70985571 | 19.47366626 | 1.00400276  | Up | 0        | 0        | AAEL006139-PA OS=Aedes<br>aegypti GN=AAEL006139 PE=3<br>SV=1                                      |
| CCG019980.1 | 1638 | 74  | 992 | 1.94124564 | 21.17131292 | 3.447056149 | Up | 0        | 0        | AAEL005585-PA OS=Aedes<br>aegypti GN=AAEL005585 PE=4<br>SV=1                                      |
| CCG022973.1 | 1592 | 288 | 992 | 7.77341933 | 21.78304683 | 1.486584513 | Up | 0        | 0        | AAEL002521-PA OS=Aedes<br>aegypti GN=AAEL002521 PE=4<br>SV=1                                      |
| CCG017482.1 | 1365 | 57  | 993 | 1.79434057 | 25.43118596 | 3.825073097 | Up | 0        | 0        | Uncharacterized protein<br>OS=Anopheles darlingi<br>GN=AND_13527 PE=4 SV=1                        |
| CCG010713.1 | 2019 | 64  | 993 | 1.36209164 | 17.19344667 | 3.657963111 | Up | 0        | 0        | AAEL003792-PA OS=Aedes<br>aegypti GN=AAEL003792 PE=4<br>SV=1                                      |
| CCG001854.1 | 1353 | 124 | 993 | 3.93809837 | 25.65673972 | 2.703766801 | Up | 1.61E-13 | 4.77E-13 | AAEL013531-PA OS=Aedes<br>aegypti GN=AAEL013531 PE=3<br>SV=1                                      |
| CCG005130.1 | 1356 | 260 | 993 | 8.23903466 | 25.59997702 | 1.635595298 | Up | 3.22E-13 | 8.81E-13 | AAEL006321-PA OS=Aedes<br>aegypti GN=AAEL006321 PE=4<br>SV=1                                      |
| CCG003232.1 | 1278 | 293 | 993 | 9.85143368 | 27.16241693 | 1.463206257 | Up | 4.19E-13 | 1.11E-12 | AAEL004183-PA OS=Aedes<br>aegypti GN=AAEL004183 PE=4<br>SV=1                                      |
| CCG015619.1 | 2547 | 174 | 994 | 2.93550602 | 13.64292388 | 2.21647175  | Up | 1.78E-13 | 5.20E-13 | Putative uncharacterized protein<br>OS=Culex quinquefasciatus<br>GN=CpipJ_CPIJ015878 PE=4<br>SV=1 |
| CCG011509.1 | 1080 | 230 | 994 | 9.150962   | 32.17456214 | 1.813925194 | Up | 3.85E-13 | 1.03E-12 | AAEL007066-PA OS=Aedes<br>aegypti GN=AAEL007066 PE=4<br>SV=1                                      |
| CCG011323.1 | 1644 | 74  | 995 | 1.9341608  | 21.15783783 | 3.451412554 | Up | 0        | 0        | Venus kinase receptor (Fragment)<br>OS=Aedes aegypti GN=VKR<br>PE=2 SV=1                          |
| CCG003390.1 | 1725 | 241 | 995 | 6.00330785 | 20.16433936 | 1.747976583 | Up | 2.37E-13 | 6.72E-13 | AAEL010107-PA OS=Aedes<br>aegypti GN=AAEL010107 PE=4<br>SV=1                                      |
| CCG027397.1 | 662  | 263 | 995 | 17.0710577 | 52.54302929 | 1.62194693  | Up | 1.40E-14 | 4.97E-14 | AAEL000847-PA OS=Aedes<br>aegypti GN=AAEL000847 PE=4<br>SV=1                                      |

|             |      |      |      |            |             |              |      |           |           |                                                                                                     |
|-------------|------|------|------|------------|-------------|--------------|------|-----------|-----------|-----------------------------------------------------------------------------------------------------|
| CCG007955.1 | 2009 | 2550 | 995  | 54.5409772 | 17.31383046 | -1.655415612 | Down | 2.04E-233 | 1.24E-232 | AAEL005738-PA OS=Aedes aegypti GN=AAEL005738 PE=4 SV=1                                              |
| CCG018728.1 | 2769 | 3153 | 995  | 48.9287011 | 12.56174987 | -1.961643535 | Down | 0         | 0         | AAEL000066-PA OS=Culex quinquefasciatus GN=CripJ_CPIJ001691 PE=4 SV=1                               |
| CCG013414.2 | 4551 | 353  | 996  | 3.33296337 | 7.650723723 | 1.198790763  | Up   | 0         | 0         | AAEL010888-PA OS=Aedes aegypti GN=AAEL010888 PE=4 SV=1                                              |
| CCG005334.2 | 3141 | 394  | 996  | 5.3900272  | 11.08514603 | 1.040263316  | Up   | 5.49E-13  | 1.41E-12  | AAEL000070-PA OS=Aedes aegypti GN=AAEL000070 PE=4 SV=1                                              |
| CCG027412.1 | 1833 | 3003 | 996  | 70.3972248 | 18.99533206 | -1.889873624 | Down | 0         | 0         | Synaptotagmin I isoform A OS=Culex pipiens GN=sytl PE=2 SV=1                                        |
| CCG001008.2 | 1776 | 111  | 997  | 2.68560841 | 19.62466326 | 2.869347032  | Up   | 0         | 0         | AAEL002272-PA OS=Aedes aegypti GN=AAEL002272 PE=4 SV=1                                              |
| CCG026826.1 | 2205 | 133  | 998  | 2.59182526 | 15.82238559 | 2.609926774  | Up   | 9.90E-14  | 3.11E-13  | AAEL009912-PA OS=Aedes aegypti GN=AAEL009912 PE=4 SV=1                                              |
| CCG018831.1 | 2642 | 378  | 998  | 6.14782728 | 13.20528396 | 1.102966785  | Up   | 1.08E-12  | 2.65E-12  | AAEL000925-PA OS=Aedes aegypti GN=AAEL000925 PE=4 SV=1                                              |
| CCG021607.1 | 1536 | 188  | 999  | 5.25931648 | 22.73653548 | 2.11206522   | Up   | 1.80E-13  | 5.25E-13  | U4/U6 small nuclear ribonucleoprotein Prp31 OS=Culex quinquefasciatus GN=CpipJ_CPIJ002179 PE=4 SV=1 |
| CCG015587.1 | 1749 | 198  | 999  | 4.86449826 | 19.96759205 | 2.037297452  | Up   | 0         | 0         | AAEL013211-PA OS=Aedes aegypti GN=AAEL013211 PE=4 SV=1                                              |
| CCG004830.1 | 783  | 339  | 999  | 18.6037548 | 44.60193933 | 1.261512608  | Up   | 1.30E-13  | 3.98E-13  | AAEL010112-PA OS=Aedes aegypti GN=AAEL010112 PE=4 SV=1                                              |
| CCG008788.2 | 938  | 3308 | 999  | 151.53932  | 37.23168283 | -2.025089448 | Down | 0         | 0         | AGAP005507-PA OS=Anopheles gambiae GN=AGAP005507 PE=4 SV=1                                          |
| CCG001576.1 | 1317 | 208  | 1000 | 6.78641215 | 26.54386999 | 1.96765777   | Up   | 3.93E-13  | 1.05E-12  | AAEL001371-PA OS=Aedes aegypti GN=AAEL001371 PE=4 SV=1                                              |
| CCG005089.1 | 2883 | 237  | 1000 | 3.53237152 | 12.12565965 | 1.77935424   | Up   | 2.32E-13  | 6.61E-13  | Lon protease homolog OS=Aedes aegypti GN=AAEL006474 PE=3 SV=1                                       |
| CCG012247.1 | 1437 | 3207 | 1000 | 95.8969651 | 24.32726289 | -1.97891115  | Down | 0         | 0         | AAEL003128-PA OS=Aedes aegypti GN=AAEL003128 PE=4 SV=1                                              |

|             |       |       |      |            |             |              |      |          |          |                                                                                          |
|-------------|-------|-------|------|------------|-------------|--------------|------|----------|----------|------------------------------------------------------------------------------------------|
| CCG005053.1 | 1287  | 141   | 1001 | 4.70763992 | 27.18977082 | 2.52998811   | Up   | 0        | 0        | AAEL012426-PA OS=Aedes aegypti GN=AAEL012426 PE=4 SV=1                                   |
| CCG015188.1 | 1221  | 213   | 1001 | 7.49594879 | 28.65948816 | 1.934829842  | Up   | 3.57E-13 | 9.60E-13 | AAEL006113-PA OS=Aedes aegypti GN=AAEL006113 PE=4 SV=1                                   |
| CCG013876.1 | 2979  | 10780 | 1001 | 155.493031 | 11.74663815 | -3.726530095 | Down | 0        | 0        | Ubiquitin carboxyl-terminal hydrolase OS=Aedes aegypti GN=AAEL010854 PE=3 SV=1           |
| CCG017229.1 | 1440  | 81    | 1002 | 2.41704757 | 24.32513425 | 3.331129994  | Up   | 4.46E-14 | 1.51E-13 | Putative uncharacterized protein OS=Culex quinquefasciatus GN=CpipJ_CPIJ005826 PE=4 SV=1 |
| CCG013192.1 | 1359  | 94    | 1002 | 2.97215236 | 25.77497669 | 3.116391145  | Up   | 0        | 0        | Putative uncharacterized protein OS=Culex quinquefasciatus GN=CpipJ_CPIJ000820 PE=4 SV=1 |
| CCG020324.1 | 1812  | 169   | 1002 | 4.00766289 | 19.33123252 | 2.270100561  | Up   | 0        | 0        | AAEL011267-PA OS=Aedes aegypti GN=AAEL011267 PE=4 SV=1                                   |
| CCG023484.1 | 1539  | 262   | 1002 | 7.31518549 | 22.76035954 | 1.637556995  | Up   | 0        | 0        | AAEL011065-PA OS=Aedes aegypti GN=AAEL011065 PE=4 SV=1                                   |
| CCG005760.1 | 1305  | 210   | 1003 | 6.91466994 | 26.8683154  | 1.958173577  | Up   | 0        | 0        | AAEL004443-PA OS=Aedes aegypti GN=AAEL004443 PE=4 SV=1                                   |
| CCG004112.1 | 2007  | 48    | 1004 | 1.02767676 | 17.48784747 | 4.088894257  | Up   | 5.35E-14 | 1.79E-13 | AAEL001357-PA OS=Aedes aegypti GN=AAEL001357 PE=4 SV=1                                   |
| CCG002105.1 | 483   | 191   | 1004 | 16.9921725 | 72.66689416 | 2.09642793   | Up   | 6.68E-14 | 2.19E-13 | AAEL003165-PA OS=Aedes aegypti GN=AAEL003165 PE=4 SV=1                                   |
| CCG027668.1 | 17138 | 4156  | 1004 | 10.4202484 | 2.047970001 | -2.347123181 | Down | 0        | 0        | AAEL007619-PA OS=Aedes aegypti GN=TOLL5A PE=4 SV=1                                       |
| CCG017327.1 | 1002  | 80    | 1005 | 3.43071733 | 35.06294227 | 3.353364895  | Up   | 0        | 0        | Putative uncharacterized protein OS=Culex quinquefasciatus GN=CpipJ_CPIJ011214 PE=4 SV=1 |
| CCG022306.1 | 2343  | 7465  | 1005 | 136.905279 | 14.99490745 | -3.190633555 | Down | 0        | 0        | AAEL011094-PA OS=Aedes aegypti GN=AAEL011094 PE=4 SV=1                                   |
| CCG008383.1 | 2181  | 133   | 1006 | 2.62034604 | 16.12472555 | 2.621445358  | Up   | 9.90E-14 | 3.11E-13 | AAEL010176-PA OS=Aedes aegypti GN=AAEL010176 PE=4 SV=1                                   |
| CCG025103.1 | 1320  | 193   | 1006 | 6.28269605 | 26.64244427 | 2.084270756  | Up   | 6.08E-14 | 2.02E-13 | AAEL002107-PA OS=Aedes aegypti GN=AAEL002107 PE=4 SV=1                                   |

|             |      |      |      |            |             |              |      |           |           |                                                                      |
|-------------|------|------|------|------------|-------------|--------------|------|-----------|-----------|----------------------------------------------------------------------|
| CCG005357.1 | 2307 | 278  | 1006 | 5.17797409 | 15.24405134 | 1.557786721  | Up   | 2.11E-14  | 7.39E-14  | AAEL010800-PA OS=Aedes aegypti GN=AAEL010800 PE=4 SV=1               |
| CCG018481.1 | 579  | 249  | 1007 | 18.4792123 | 60.79962817 | 1.71815924   | Up   | 0         | 0         | AAEL010504-PA OS=Aedes aegypti GN=AAEL010504 PE=4 SV=1               |
| CCG016127.1 | 2576 | 295  | 1007 | 4.92083529 | 13.66575493 | 1.473590028  | Up   | 2.32E-13  | 6.61E-13  | Dicer 2 isoform A OS=Aedes albopictus GN=Dcr-2 PE=2 SV=1             |
| CCG002362.1 | 1674 | 138  | 1008 | 3.54230787 | 21.05014515 | 2.571068671  | Up   | 1.49E-13  | 4.45E-13  | AAEL002249-PA OS=Aedes aegypti GN=AAEL002249 PE=4 SV=1               |
| CCG002790.1 | 732  | 4229 | 1008 | 248.25001  | 48.13926637 | -2.366507718 | Down | 0         | 0         | AAEL013744-PA OS=Aedes aegypti GN=AAEL013744 PE=2 SV=1               |
| CCG027709.1 | 830  | 2190 | 1009 | 113.377974 | 42.4974714  | -1.415691492 | Down | 1.79E-159 | 1.03E-158 | AAEL005772-PA OS=Aedes aegypti GN=AAEL005772 PE=2 SV=1               |
| CCG011025.2 | 2484 | 90   | 1010 | 1.55687444 | 14.21411415 | 3.190599685  | Up   | 0         | 0         | AAEL014265-PA OS=Aedes aegypti GN=AAEL014265 PE=4 SV=1               |
| CCG025770.1 | 1032 | 136  | 1010 | 5.6626782  | 34.21304219 | 2.59498994   | Up   | 1.70E-13  | 4.98E-13  | Uncharacterized protein OS=Anopheles darlingi GN=AND_01799 PE=4 SV=1 |
| CCG014127.1 | 2403 | 162  | 1010 | 2.89683604 | 14.69324159 | 2.342602779  | Up   | 0         | 0         | AAEL006032-PA OS=Aedes aegypti GN=AAEL006032 PE=4 SV=1               |
| CCG007654.1 | 1959 | 361  | 1010 | 7.91836355 | 18.02340967 | 1.186597755  | Up   | 1.35E-13  | 4.08E-13  | AAEL006041-PA (Fragment) OS=Aedes aegypti GN=AAEL006041 PE=4 SV=1    |
| CCG003060.1 | 1738 | 2209 | 1010 | 54.6145821 | 20.31522413 | -1.426724922 | Down | 9.86E-163 | 5.69E-162 | AAEL006910-PA OS=Aedes aegypti GN=AAEL006910 PE=4 SV=1               |
| CCG019622.4 | 2202 | 411  | 1011 | 8.02023657 | 16.05032598 | 1.000885902  | Up   | 0         | 0         | Coronin OS=Aedes aegypti GN=AAEL001360 PE=3 SV=1                     |
| CCG002031.1 | 2081 | 139  | 1012 | 2.87015527 | 17.00037294 | 2.566365706  | Up   | 1.46E-13  | 4.37E-13  | AAEL010847-PA OS=Aedes aegypti GN=AAEL010847 PE=4 SV=1               |
| CCG006138.1 | 1682 | 3610 | 1013 | 92.2239845 | 21.05394433 | -2.131051459 | Down | 0         | 0         | AAEL004951-PA OS=Aedes aegypti GN=AAEL004951 PE=4 SV=1               |
| CCG023679.1 | 2038 | 262  | 1014 | 5.52407776 | 17.39337225 | 1.654732139  | Up   | 0         | 0         | AAEL006409-PA OS=Aedes aegypti GN=AAEL006409 PE=4 SV=1               |
| CCG024808.1 | 2955 | 61   | 1015 | 0.88702329 | 12.00766529 | 3.758839878  | Up   | 1.75E-14  | 6.18E-14  | AAEL011329-PA (Fragment) OS=Aedes aegypti GN=AAEL011329 PE=4 SV=1    |

|             |      |      |      |            |             |              |      |           |           |                                                                 |
|-------------|------|------|------|------------|-------------|--------------|------|-----------|-----------|-----------------------------------------------------------------|
| CCG024107.1 | 1023 | 131  | 1015 | 5.50247823 | 34.68489826 | 2.656154214  | Up   | 1.26E-13  | 3.87E-13  | AAEL008088-PA OS=Aedes aegypti GN=AAEL008088 PE=4 SV=1          |
| CCG010509.1 | 759  | 395  | 1015 | 22.3623784 | 46.7492107  | 1.063868373  | Up   | 0         | 0         | AAEL001496-PA OS=Aedes aegypti GN=AAEL001496 PE=4 SV=1          |
| CCG012443.1 | 979  | 2202 | 1015 | 96.6489843 | 36.2437701  | -1.415021538 | Down | 3.19E-160 | 1.83E-159 | AAEL011992-PA OS=Aedes aegypti GN=AAEL011992 PE=4 SV=1          |
| CCG023897.1 | 743  | 49   | 1016 | 2.83380484 | 47.80297335 | 4.076288046  | Up   | 0         | 0         | -                                                               |
| CCG006554.2 | 3270 | 79   | 1016 | 1.03810674 | 10.86165419 | 3.387217142  | Up   | 0         | 0         | AAEL010010-PA OS=Aedes aegypti GN=AAEL010010 PE=4 SV=1          |
| CCG016322.1 | 2124 | 157  | 1016 | 3.17619978 | 16.72203823 | 2.396377142  | Up   | 0         | 0         | AAEL007058-PA OS=Aedes aegypti GN=AAEL007058 PE=4 SV=1          |
| CCG016654.1 | 1332 | 262  | 1017 | 8.45200486 | 26.69111672 | 1.658994166  | Up   | 0         | 0         | AAEL012440-PA OS=Aedes aegypti GN=AAEL012440 PE=4 SV=1          |
| CCG014280.1 | 1701 | 42   | 1018 | 1.0609811  | 20.9215319  | 4.301517627  | Up   | 7.66E-14  | 2.47E-13  | AAEL015080-PA OS=Aedes aegypti GN=AAEL015080 PE=4 SV=1          |
| CCG016437.1 | 1479 | 1674 | 1018 | 48.6351154 | 24.06188354 | -1.015248763 | Down | 9.68E-73  | 4.84E-72  | AAEL003697-PA OS=Aedes aegypti GN=SRPN17 PE=3 SV=2              |
| CCG025560.1 | 4866 | 1998 | 1018 | 17.6435532 | 7.313507142 | -1.270505818 | Down | 1.83E-123 | 1.01E-122 | AAEL009266-PA OS=Aedes aegypti GN=AAEL009266 PE=4 SV=1          |
| CCG025968.1 | 1119 | 235  | 1019 | 9.02402827 | 31.83421272 | 1.818734593  | Up   | 4.34E-13  | 1.14E-12  | AAEL002166-PA OS=Aedes aegypti GN=AAEL002166 PE=4 SV=1          |
| CCG021664.1 | 930  | 289  | 1019 | 13.3529605 | 38.30374627 | 1.520325857  | Up   | 0         | 0         | Caspase OS=Culex quinquefasciatus GN=CpipJ_CPIJ000671 PE=3 SV=1 |
| CCG003794.1 | 633  | 64   | 1020 | 4.34449134 | 56.33087252 | 3.696666641  | Up   | 0         | 0         | AAEL001955-PA OS=Aedes aegypti GN=AAEL001955 PE=4 SV=1          |
| CCG003408.1 | 1356 | 1829 | 1020 | 57.95844   | 26.2960489  | -1.140172719 | Down | 1.59E-95  | 8.35E-95  | Carboxypeptidase A OS=Aedes aegypti GN=CPA-II PE=2 SV=1         |
| CCG017967.1 | 1629 | 216  | 1021 | 5.69764437 | 21.91062037 | 1.943192853  | Up   | 1.38E-13  | 4.17E-13  | AAEL001173-PA OS=Aedes aegypti GN=AAEL001173 PE=4 SV=1          |
| CCG018248.1 | 1353 | 406  | 1021 | 12.8940963 | 26.3801926  | 1.032744438  | Up   | 1.21E-13  | 3.73E-13  | Caspase OS=Aedes aegypti GN=CASPL2 PE=3 SV=1                    |
| CCG010996.1 | 1200 | 3729 | 1021 | 133.52845  | 29.74366715 | -2.166492727 | Down | 0         | 0         | AAEL002781-PA OS=Aedes aegypti GN=AAEL002781 PE=3 SV=1          |

|             |      |       |      |            |             |              |      |          |          |                                                                                          |
|-------------|------|-------|------|------------|-------------|--------------|------|----------|----------|------------------------------------------------------------------------------------------|
| CCG000945.1 | 645  | 0     | 1022 | 0.001      | 55.39125405 | 15.75737058  | Up   | 4.44E-16 | 1.66E-15 | AAEL008182-PA OS=Aedes aegypti GN=AAEL008182 PE=4 SV=1                                   |
| CCG012088.1 | 1654 | 52    | 1022 | 1.35092273 | 21.60057972 | 3.999052967  | Up   | 0        | 0        | AAEL003763-PA (Fragment) OS=Aedes aegypti GN=CYP329B1 PE=3 SV=1                          |
| CCG008444.1 | 1785 | 73    | 1022 | 1.75730567 | 20.01532709 | 3.509668126  | Up   | 0        | 0        | Flizzled-5 OS=Culex quinquefasciatus GN=CpipJ_CPIJ018158 PE=4 SV=1                       |
| CCG006284.1 | 2364 | 73    | 1022 | 1.32689959 | 15.11309597 | 3.509668126  | Up   | 0        | 0        | AAEL000404-PA OS=Aedes aegypti GN=AAEL000404 PE=4 SV=1                                   |
| CCG017986.1 | 2468 | 94    | 1022 | 1.63661064 | 14.47623941 | 3.144903833  | Up   | 0        | 0        | AAEL005719-PA OS=Aedes aegypti GN=AAEL005719 PE=4 SV=1                                   |
| CCG007908.3 | 3058 | 187   | 1022 | 2.62764564 | 11.68324358 | 2.152598225  | Up   | 3.31E-13 | 9.03E-13 | AAEL005295-PA OS=Aedes aegypti GN=AAEL003293 PE=4 SV=1                                   |
| CCG027370.1 | 2736 | 227   | 1022 | 3.56510591 | 13.0582452  | 1.872944197  | Up   | 0        | 0        | Putative uncharacterized protein OS=Culex quinquefasciatus GN=CpipJ_CPIJ010636 PE=4 SV=1 |
| CCG011192.2 | 4489 | 331   | 1022 | 3.1684077  | 7.958868091 | 1.328805278  | Up   | 0        | 0        | AAEL004790-PA OS=Aedes aegypti GN=AAEL004790 PE=4 SV=1                                   |
| CCG007417.1 | 772  | 343   | 1022 | 19.0914754 | 46.27896226 | 1.277427919  | Up   | 0        | 0        | Nucleoside diphosphate kinase OS=Aedes aegypti GN=AAEL004107 PE=3 SV=1                   |
| CCG021142.1 | 1676 | 368   | 1022 | 9.43488206 | 21.31703989 | 1.175930729  | Up   | 3.69E-13 | 9.91E-13 | Uncharacterized protein OS=Anopheles darlingi GN=AND_17136 PE=4 SV=1                     |
| CCG010144.1 | 441  | 15662 | 1022 | 1526.05892 | 81.01441919 | -4.235488148 | Down | 0        | 0        | AAEL011184-PA OS=Aedes aegypti GN=AAEL011184 PE=3 SV=1                                   |
| CCG001266.1 | 1595 | 224   | 1023 | 6.03462104 | 22.42151545 | 1.893548712  | Up   | 2.04E-13 | 5.88E-13 | AAEL003354-PA OS=Aedes aegypti GN=AAEL003354 PE=4 SV=1                                   |
| CCG017156.1 | 2316 | 338   | 1023 | 6.27105799 | 15.441415   | 1.300024197  | Up   | 1.44E-13 | 4.32E-13 | Mediator complex OS=Culex quinquefasciatus GN=CpipJ_CPIJ001509 PE=4 SV=1                 |
| CCG010258.1 | 930  | 64    | 1024 | 2.95705701 | 38.49169399 | 3.702313204  | Up   | 0        | 0        | Eye pigment transporter OS=Aedes aegypti GN=white PE=2 SV=1                              |



|             |      |      |      |            |             |              |      |           |           |                                                                  |
|-------------|------|------|------|------------|-------------|--------------|------|-----------|-----------|------------------------------------------------------------------|
| CCG007819.1 | 1095 | 211  | 1024 | 8.28001279 | 32.69157572 | 1.981214015  | Up   | 1.30E-13  | 3.98E-13  | AAEL010077-PA OS=Aedes aegypti GN=AAEL010077 PE=4 SV=1           |
| CCG018361.1 | 2049 | 220  | 1024 | 4.61363671 | 17.47060782 | 1.92095349   | Up   | 4.61E-13  | 1.20E-12  | AAEL0008721-PA OS=Aedes aegypti GN=AAEL008721 PE=4 SV=1          |
| CCG008448.1 | 4653 | 386  | 1024 | 3.56465024 | 7.693375331 | 1.109856167  | Up   | 2.52E-13  | 7.09E-13  | AAEL0008705-PA OS=Aedes aegypti GN=AAEL008705 PE=4 SV=1          |
| CCG004525.1 | 746  | 6    | 1025 | 0.34560108 | 48.03248484 | 7.118758897  | Up   | 8.38E-06  | 1.47E-05  | AAEL012504-PA OS=Aedes aegypti GN=AAEL012504 PE=4 SV=1           |
| CCG012405.1 | 1569 | 155  | 1025 | 4.24493873 | 22.83762504 | 2.427596993  | Up   | 3.42E-13  | 9.25E-13  | AAEL007328-PA OS=Aedes aegypti GN=AAEL007328 PE=4 SV=1           |
| CCG020099.1 | 1305 | 163  | 1026 | 5.36710095 | 27.48443829 | 2.356400065  | Up   | 1.80E-13  | 5.24E-13  | AAEL012318-PA OS=Aedes aegypti GN=AAEL012318 PE=3 SV=1           |
| CCG004002.1 | 1673 | 38   | 1027 | 0.97600114 | 21.45974312 | 4.458606157  | Up   | 4.26E-14  | 1.45E-13  | AGAP001938-PA OS=Anopheles gambiae GN=AgaP_AGAP001938 PE=4 SV=4  |
| CCG024750.2 | 1836 | 198  | 1027 | 4.63399099 | 19.55454806 | 2.07717705   | Up   | 0         | 0         | AAEL011442-PA OS=Aedes aegypti GN=AAEL011442 PE=4 SV=1           |
| CCG005616.1 | 1447 | 2405 | 1029 | 71.4182528 | 24.85975591 | -1.522480708 | Down | 5.40E-195 | 3.21E-194 | AAEL012311-PA OS=Aedes aegypti GN=AAEL012311 PE=3 SV=1           |
| CCG027579.1 | 762  | 117  | 1030 | 6.59771516 | 47.25331375 | 2.840377106  | Up   | 9.44E-14  | 2.97E-13  | AAEL009579-PA OS=Aedes aegypti GN=AAEL009579 PE=4 SV=1           |
| CCG005187.1 | 2085 | 119  | 1030 | 2.45246927 | 17.26955639 | 2.815924063  | Up   | 0         | 0         | AAEL003141-PA OS=Aedes aegypti GN=AAEL003141 PE=4 SV=1           |
| CCG019657.1 | 1766 | 32   | 1031 | 0.77861354 | 20.4088241  | 4.712141821  | Up   | 1.77E-13  | 5.17E-13  | AAEL009987-PA OS=Aedes aegypti GN=AAEL009987 PE=4 SV=1           |
| CCG002971.1 | 1746 | 221  | 1031 | 5.43889539 | 20.64260215 | 1.924239262  | Up   | 0         | 0         | AAEL009704-PA OS=Aedes aegypti GN=AAEL009704 PE=4 SV=1           |
| CCG010251.1 | 978  | 2964 | 1031 | 130.227294 | 36.85274371 | -1.821187911 | Down | 0         | 0         | AAEL003453-PA OS=Aedes aegypti GN=AAEL003453 PE=4 SV=1           |
| CCG007922.1 | 3063 | 66   | 1032 | 0.92589046 | 11.77830285 | 3.66914634   | Up   | 0         | 0         | Raptorra OS=Culex quinquefasciatus GN=CpipJ_CPIJ004643 PE=4 SV=1 |

|             |      |      |      |            |             |              |      |          |          |                                                                                                |
|-------------|------|------|------|------------|-------------|--------------|------|----------|----------|------------------------------------------------------------------------------------------------|
| CCG011478.1 | 1533 | 156  | 1032 | 4.37265401 | 23.53355618 | 2.42813824   | Up   | 1.42E-13 | 4.26E-13 | Serine/threonine-protein phosphatase (Fragment)<br>OS=Aedes aegypti<br>GN=AAEL008930 PE=3 SV=1 |
| CCG000910.1 | 579  | 160  | 1032 | 11.8741926 | 62.3090529  | 2.391612364  | Up   | 4.24E-14 | 1.45E-13 | AAEL011233-FA OS=Aedes aegypti GN=AAEL011233 PE=4 SV=1                                         |
| CCG025408.1 | 1503 | 68   | 1033 | 1.94407316 | 24.02654684 | 3.627474901  | Up   | 0        | 0        | AAEL015640-FA OS=Aedes aegypti GN=AAEL015640 PE=4 SV=1                                         |
| CCG014771.1 | 825  | 390  | 1033 | 20.3129655 | 43.77199989 | 1.107607429  | Up   | 6.59E-13 | 1.68E-12 | AAEL012502-FA OS=Aedes aegypti GN=AAEL012502 PE=4 SV=1                                         |
| CCG009584.1 | 909  | 104  | 1034 | 4.91622926 | 39.76552055 | 3.015893956  | Up   | 0        | 0        | AAEL004976-FA OS=Aedes aegypti GN=AAEL004976 PE=4 SV=1                                         |
| CCG011307.1 | 2751 | 1778 | 1034 | 27.7717878 | 13.13953405 | -1.079705935 | Down | 3.47E-85 | 1.78E-84 | AAEL005439-FA OS=Aedes aegypti GN=AAEL005439 PE=4 SV=1                                         |
| CCG014290.1 | 3506 | 79   | 1035 | 0.96822848 | 10.31997047 | 3.413947508  | Up   | 0        | 0        | AAEL014377-FA OS=Aedes aegypti GN=AAEL014377 PE=4 SV=1                                         |
| CCG022025.2 | 1799 | 6124 | 1035 | 146.273849 | 20.11218258 | -2.862530311 | Down | 0        | 0        | AAEL005336-FA OS=Aedes aegypti GN=AAEL005336 PE=3 SV=1                                         |
| CCG013240.1 | 894  | 274  | 1036 | 13.1696949 | 40.51093371 | 1.621089409  | Up   | 0        | 0        | Putative uncharacterized protein<br>OS=Culex quinquefasciatus<br>GN=CpipJ_CPIJ017153 PE=4 SV=1 |
| CCG012564.1 | 2172 | 381  | 1036 | 7.5375087  | 16.67438984 | 1.145474304  | Up   | 0        | 0        | Semaphorin<br>OS=Culex quinquefasciatus<br>GN=CpipJ_CPIJ001595 PE=4 SV=1                       |
| CCG016276.1 | 816  | 42   | 1037 | 2.21167752 | 44.4261434  | 4.32819596   | Up   | 7.66E-14 | 2.47E-13 | AAEL000046-FA OS=Aedes aegypti GN=AAEL000046 PE=4 SV=1                                         |
| CCG021249.1 | 3504 | 276  | 1037 | 3.38460238 | 10.34581422 | 1.611988926  | Up   | 0        | 0        | AAEL008324-FA OS=Aedes aegypti GN=AAEL008324 PE=4 SV=1                                         |
| CCG010681.1 | 2193 | 159  | 1038 | 3.11545271 | 16.54659886 | 2.409020977  | Up   | 5.53E-14 | 1.84E-13 | AAEL013968-FA OS=Aedes aegypti GN=AAEL013968 PE=4 SV=1                                         |
| CCG015982.1 | 1065 | 301  | 1038 | 12.1444978 | 34.0720106  | 1.488284255  | Up   | 0        | 0        | AAEL003903-FA OS=Aedes aegypti GN=AAEL003903 PE=4 SV=1                                         |
| CCG026552.1 | 792  | 21   | 1039 | 1.13934902 | 45.86066864 | 5.33097572   | Up   | 1.76E-10 | 3.72E-10 | AAEL004798-FA OS=Aedes aegypti GN=AAEL004798 PE=4 SV=1                                         |

|             |      |      |      |            |             |             |      |           |           |                                                                           |
|-------------|------|------|------|------------|-------------|-------------|------|-----------|-----------|---------------------------------------------------------------------------|
| CCG017529.1 | 1866 | 82   | 1039 | 1.88827344 | 19.46497833 | 3.365741138 | Up   | 0         | 0         | AAEL012838-PA OS=Aedes aegypti GN=AAEL012838 PE=4 SV=1                    |
| CCG017199.1 | 3915 | 105  | 1039 | 1.15244499 | 9.277560553 | 3.009047625 | Up   | 0         | 0         | AAEL002339-PA OS=Aedes aegypti GN=AAEL002339 PE=4 SV=1                    |
| CCG019474.1 | 2841 | 138  | 1039 | 2.08723104 | 12.78481153 | 2.614768686 | Up   | 1.49E-13  | 4.45E-13  | Phosphatase 4 OS=Culex quinquefasciatus GN=CpipJ_CPIJ012238 PE=4 SV=1     |
| CCG000292.1 | 2766 | 96   | 1040 | 1.49135738 | 13.14410985 | 3.139718516 | Up   | 0         | 0         | AAEL006031-PA OS=Aedes aegypti GN=AAEL006031 PE=4 SV=1                    |
| CCG007222.1 | 1806 | 100  | 1040 | 2.37927656 | 20.13101209 | 3.080824827 | Up   | 0         | 0         | AAEL005074-PA OS=Aedes aegypti GN=AAEL005074 PE=4 SV=1                    |
| CCG010389.1 | 2961 | 242  | 1040 | 3.51187969 | 12.27848965 | 1.80581778  | Up   | 3.87E-13  | 1.03E-12  | AAEL001332-PA OS=Aedes aegypti GN=AAEL001332 PE=4 SV=1                    |
| CCG000248.1 | 1452 | 81   | 1041 | 2.39707197 | 25.06306207 | 3.386217554 | Up   | 4.46E-14  | 1.51E-13  | AAEL007656-PA OS=Aedes aegypti GN=AAEL007656 PE=4 SV=1                    |
| CCG027167.1 | 2673 | 270  | 1041 | 4.34037723 | 13.61450285 | 1.64925196  | Up   | 2.59E-13  | 7.26E-13  | AAEL013903-PB OS=Aedes aegypti GN=AAEL013903 PE=4 SV=1                    |
| CCG019118.2 | 1422 | 330  | 1041 | 9.97187934 | 25.59181865 | 1.359745343 | Up   | 1.76E-13  | 5.16E-13  | AAEL002137-PB OS=Aedes aegypti GN=AAEL002137 PE=4 SV=1                    |
| CCG014163.1 | 5542 | 321  | 1042 | 2.48886409 | 6.572812053 | 1.401023279 | Up   | 0         | 0         | -                                                                         |
| CCG000427.1 | 1519 | 167  | 1043 | 4.72412487 | 24.0036094  | 2.345132354 | Up   | 1.62E-13  | 4.78E-13  | CCA-adding enzyme OS=Culex quinquefasciatus GN=CpipJ_CPIJ013325 PE=3 SV=1 |
| CCG025028.1 | 717  | 376  | 1043 | 22.5336405 | 50.85283497 | 1.174247795 | Up   | 3.71E-14  | 1.28E-13  | AAEL009109-PA OS=Aedes aegypti GN=AAEL009109 PE=4 SV=1                    |
| CCG022026.1 | 1961 | 2032 | 1043 | 44.5254976 | 18.5933109  | -1.25984804 | Down | 6.69E-124 | 3.69E-123 | AAEL014960-PA (Fragment) OS=Aedes aegypti GN=AAEL014960 PE=4 SV=1         |
| CCG016800.1 | 1341 | 269  | 1044 | 8.61958136 | 27.21583963 | 1.658756838 | Up   | 0         | 0         | AAEL005346-PA OS=Aedes aegypti GN=AAEL005346 PE=4 SV=1                    |
| CCG010217.1 | 2361 | 194  | 1045 | 3.53076176 | 15.47285016 | 2.131687589 | Up   | 5.97E-13  | 1.53E-12  | AAEL011862-PA OS=Aedes aegypti GN=AAEL011862 PE=4 SV=1                    |
| CCG007403.1 | 6964 | 384  | 1045 | 2.36938226 | 5.245749458 | 1.14663793  | Up   | 1.03E-12  | 2.55E-12  | AAEL004064-PA OS=Aedes aegypti GN=AAEL004064 PE=4 SV=1                    |

|             |      |      |      |            |             |              |      |           |           |                                                                                                  |
|-------------|------|------|------|------------|-------------|--------------|------|-----------|-----------|--------------------------------------------------------------------------------------------------|
| CCG013057.1 | 3705 | 139  | 1046 | 1.61208991 | 9.869462214 | 2.614039267  | Up   | 1.46E-13  | 4.37E-13  | r-box and leucine-rich repeat protein 11 OS=Culex quinquefasciatus GN=CpipJ_CPIJ008371 PE=4 SV=1 |
| CCG006878.1 | 2640 | 236  | 1046 | 3.84123385 | 13.85089299 | 1.850337291  | Up   | 4.60E-13  | 1.20E-12  | AAEL007300-PA OS=Aedes aegypti GN=AAEL007360 PE=4 SV=1                                           |
| CCG025397.1 | 2189 | 45   | 1047 | 0.88334311 | 16.72056454 | 4.242505834  | Up   | 0         | 0         | Chromatin regulatory protein sir2 OS=Culex quinquefasciatus GN=CpipJ_CPIJ006725 PE=4 SV=1        |
| CCG011720.1 | 1578 | 341  | 1047 | 9.28560171 | 23.19475018 | 1.320731002  | Up   | 2.98E-13  | 8.25E-13  | AAEL013635-PA OS=Aedes aegypti GN=AAEL013635 PE=4 SV=1                                           |
| CCG003170.1 | 2679 | 394  | 1047 | 6.31955037 | 13.66230526 | 1.112307111  | Up   | 5.49E-13  | 1.41E-12  | Adenosine A2 receptor OS=Culex quinquefasciatus GN=CpipJ_CPIJ016092 PE=4 SV=1                    |
| CCG010631.1 | 4098 | 2102 | 1047 | 22.0406008 | 8.931507023 | -1.303188023 | Down | 5.50E-135 | 3.07E-134 | AAEL004319-PA (Fragment) OS=Aedes aegypti GN=AAEL004319 PE=4 SV=1                                |
| CCG027646.1 | 1377 | 225  | 1048 | 7.02119847 | 26.60586351 | 1.921955014  | Up   | 0         | 0         | AAEL007313-PA OS=Aedes aegypti GN=AAEL007313 PE=4 SV=1                                           |
| CCG000592.1 | 2328 | 2172 | 1048 | 40.0903194 | 15.73723112 | -1.349072182 | Down | 5.08E-147 | 2.87E-146 | AAEL011393-PB OS=Aedes aegypti GN=AAEL011393 PE=4 SV=1                                           |
| CCG027226.1 | 2417 | 2896 | 1048 | 51.4854578 | 15.15774682 | -1.764109682 | Down | 7.94E-290 | 4.97E-289 | AAEL012888-PA (Fragment) OS=Aedes aegypti GN=AAEL012888 PE=4 SV=1                                |
| CCG016499.1 | 2643 | 129  | 1049 | 2.09727422 | 13.87485143 | 2.725884911  | Up   | 0         | 0         | AAEL005152-PA OS=Aedes aegypti GN=AAEL005152 PE=4 SV=1                                           |
| CCG027694.1 | 2172 | 184  | 1049 | 3.64016168 | 16.88362446 | 2.21355021   | Up   | 3.33E-13  | 9.08E-13  | Zinc finger protein ZTT OS=Culex quinquefasciatus GN=CpipJ_CPIJ000636 PE=4 SV=1                  |
| CCG003584.1 | 639  | 425  | 1049 | 28.5792445 | 57.38847001 | 1.005793135  | Up   | 1.58E-12  | 3.80E-12  | Guanylate kinase OS=Culex quinquefasciatus GN=CpipJ_CPIJ007795 PE=4 SV=1                         |
| CCG001842.1 | 1787 | 4982 | 1049 | 119.795869 | 20.5211149  | -2.54539714  | Down | 0         | 0         | AAEL008167-PB OS=Aedes aegypti GN=AAEL008167 PE=3 SV=1                                           |

|             |      |      |      |            |             |              |      |           |           |                                                                                          |
|-------------|------|------|------|------------|-------------|--------------|------|-----------|-----------|------------------------------------------------------------------------------------------|
| CCG006780.1 | 771  | 224  | 1050 | 12.4840734 | 47.60854813 | 1.931131894  | Up   | 2.04E-13  | 5.88E-13  | AAEL007522-PA OS=Aedes aegypti GN=AAEL007522 PE=4 SV=1                                   |
| CCG009233.1 | 741  | 289  | 1050 | 16.7587764 | 49.53601972 | 1.563561134  | Up   | 0         | 0         | AAEL000649-PA OS=Aedes aegypti GN=AAEL000649 PE=4 SV=1                                   |
| CCG000092.1 | 1290 | 402  | 1050 | 13.3905685 | 28.45441133 | 1.087435125  | Up   | 0         | 0         | AAEL007280-PA OS=Aedes aegypti GN=AAEL007280 PE=4 SV=1                                   |
| CCG027844.1 | 1777 | 363  | 1051 | 8.77772294 | 20.67594197 | 1.23603442   | Up   | 0         | 0         | AAEL012973-PA OS=Aedes aegypti GN=AAEL012973 PE=4 SV=1                                   |
| CCG002100.1 | 1659 | 2074 | 1051 | 53.7186435 | 22.14656352 | -1.278340021 | Down | 2.60E-129 | 1.44E-128 | AAEL006150-PA OS=Aedes aegypti GN=AAEL006150 PE=4 SV=1                                   |
| CCG013625.1 | 1851 | 73   | 1052 | 1.69464648 | 19.86823726 | 3.551407634  | Up   | 0         | 0         | AAEL005858-PA OS=Aedes aegypti GN=AAEL005858 PE=4 SV=1                                   |
| CCG015406.1 | 957  | 312  | 1052 | 14.0089417 | 38.42853413 | 1.455829974  | Up   | 9.28E-14  | 2.93E-13  | AAEL011753-PA OS=Aedes aegypti GN=AAEL011753 PE=4 SV=1                                   |
| CCG007519.1 | 2309 | 99   | 1053 | 1.84235761 | 15.94242765 | 3.113246305  | Up   | 0         | 0         | AAEL008519-PA OS=Aedes aegypti GN=AAEL008519 PE=4 SV=1                                   |
| CCG003938.1 | 651  | 167  | 1053 | 11.022958  | 56.54541542 | 2.358898632  | Up   | 1.62E-13  | 4.77E-13  | AAEL002980-PA OS=Aedes aegypti GN=AAEL002980 PE=4 SV=1                                   |
| CCG015204.1 | 854  | 193  | 1053 | 9.71095876 | 43.10429209 | 2.150145888  | Up   | 6.08E-14  | 2.02E-13  | -                                                                                        |
| CCG018468.1 | 2091 | 268  | 1053 | 5.50735958 | 17.60452675 | 1.676513734  | Up   | 0         | 0         | AAEL012020-PA OS=Aedes aegypti GN=AAEL012020 PE=4 SV=1                                   |
| CCG014136.1 | 2117 | 377  | 1053 | 7.65214452 | 17.38831622 | 1.184182212  | Up   | 4.66E-13  | 1.21E-12  | Putative uncharacterized protein OS=Culex quinquefasciatus GN=CpipJ_CPIJ003701 PE=4 SV=1 |
| CCG020144.1 | 933  | 195  | 1054 | 8.9808127  | 39.49198684 | 2.136642042  | Up   | 2.26E-13  | 6.47E-13  | AAEL002139-PA OS=Aedes aegypti GN=AAEL002139 PE=4 SV=1                                   |
| CCG003827.1 | 1244 | 375  | 1054 | 12.9530952 | 29.61899013 | 1.19322557   | Up   | 0         | 0         | AAEL009879-PA OS=Aedes aegypti GN=AAEL009879 PE=4 SV=1                                   |
| CCG013244.3 | 2274 | 6609 | 1054 | 124.884334 | 16.20317666 | -2.946243925 | Down | 0         | 0         | (Z) long form OS=Culex quinquefasciatus GN=CpipJ_CPIJ017150 PE=4 SV=1                    |
| CCG011229.1 | 1347 | 152  | 1055 | 4.84884904 | 27.38009057 | 2.497412974  | Up   | 8.39E-14  | 2.69E-13  | AAEL010343-PA (Fragment) OS=Aedes aegypti GN=AAEL010343 PE=4 SV=1                        |

|             |      |      |      |            |             |              |      |           |           |                                                                                                   |
|-------------|------|------|------|------------|-------------|--------------|------|-----------|-----------|---------------------------------------------------------------------------------------------------|
| CCG023618.2 | 3057 | 311  | 1055 | 4.3714712  | 12.06443637 | 1.464569717  | Up   | 0         | 0         | Putative uncharacterized protein<br>OS=Culex quinquefasciatus<br>GN=CpipJ_CPIJ008646 PE=4<br>SV=1 |
| CCG004012.2 | 1443 | 32   | 1056 | 0.95289779 | 25.58277219 | 4.746707323  | Up   | 1.77E-13  | 5.16E-13  | AAEL011358-PA OS=Aedes<br>aegypti GN=AAEL011358 PE=4<br>SV=1                                      |
| CCG001642.1 | 1890 | 330  | 1056 | 7.50265207 | 19.53224353 | 1.380385109  | Up   | 1.76E-13  | 5.16E-13  | AAEL013891-PA OS=Aedes<br>aegypti GN=AAEL013891 PE=4<br>SV=1                                      |
| CCG017468.1 | 1697 | 1913 | 1056 | 48.4390703 | 21.75364777 | -1.154913835 | Down | 7.06E-102 | 3.75E-101 | AGAP000295-PA OS=Anopheles<br>gambiae GN=AgaP_AGAP000295<br>PE=4 SV=4                             |
| CCG018292.1 | 1748 | 117  | 1057 | 2.87612068 | 21.13895798 | 2.877708146  | Up   | 9.44E-14  | 2.97E-13  | AAEL007726-PA OS=Aedes<br>aegypti GN=AAEL007726 PE=4<br>SV=1                                      |
| CCG012657.1 | 1143 | 129  | 1057 | 4.84960259 | 32.32799523 | 2.73684561   | Up   | 0         | 0         | AAEL001922-PA OS=Aedes<br>aegypti GN=AAEL001922 PE=4<br>SV=1                                      |
| CCG019388.1 | 2589 | 143  | 1057 | 2.37337661 | 14.27226672 | 2.588201528  | Up   | 0         | 0         | Putative uncharacterized protein<br>OS=Culex quinquefasciatus<br>GN=CpipJ_CPIJ019663 PE=4<br>SV=1 |
| CCG001598.1 | 3313 | 411  | 1057 | 5.33068546 | 11.15330472 | 1.065078282  | Up   | 0         | 0         | Putative uncharacterized protein<br>OS=Culex quinquefasciatus<br>GN=CpipJ_CPIJ011525 PE=4<br>SV=1 |
| CCG009259.1 | 486  | 17   | 1058 | 1.50305656 | 76.10258606 | 5.661974275  | Up   | 3.39E-09  | 6.89E-09  | -                                                                                                 |
| CCG016429.1 | 1782 | 171  | 1058 | 4.12335837 | 20.75525074 | 2.331584601  | Up   | 3.42E-13  | 9.26E-13  | AAEL012413-PA OS=Aedes<br>aegypti GN=AAEL012413 PE=4<br>SV=1                                      |
| CCG007981.1 | 1248 | 8348 | 1058 | 287.428962 | 29.63610323 | -3.277777769 | Down | 0         | 0         | Phosphoglycerate kinase<br>OS=Aedes aegypti GN=PGK<br>PE=3 SV=1                                   |
| CCG014166.1 | 2120 | 64   | 1059 | 1.29719954 | 17.46264863 | 3.750800078  | Up   | 0         | 0         | Actin OS=Culex quinquefasciatus<br>GN=CpipJ_CPIJ003226 PE=3<br>SV=1                               |
| CCG027004.1 | 1134 | 224  | 1059 | 8.48784881 | 32.64622143 | 1.943445156  | Up   | 2.04E-13  | 5.87E-13  | AAEL010784-PA OS=Aedes<br>aegypti GN=AAEL010784 PE=4<br>SV=1                                      |
| CCG016492.2 | 1050 | 5035 | 1059 | 206.050108 | 35.25791914 | -2.546975985 | Down | 0         | 0         | AAEL006171-PA (Fragment)<br>OS=Aedes aegypti<br>GN=AAEL006171 PE=4 SV=1                           |

|             |      |      |      |            |             |              |      |           |           |                                                                                                |
|-------------|------|------|------|------------|-------------|--------------|------|-----------|-----------|------------------------------------------------------------------------------------------------|
| CCG016760.1 | 2811 | 102  | 1061 | 1.55920062 | 13.19485295 | 3.081096803  | Up   | 0         | 0         | Uncharacterized protein<br>OS=Anopheles darlingi<br>GN=AND_12961 PE=4 SV=1                     |
| CCG004023.3 | 1181 | 166  | 1061 | 6.03977641 | 31.40620801 | 2.378482713  | Up   | 1.83E-13  | 5.31E-13  | integrator complex subunit 12<br>OS=Culex quinquefasciatus<br>GN=CpipJ_CPIJ008030 PE=4<br>SV=1 |
| CCG024049.1 | 1626 | 273  | 1061 | 7.21447574 | 22.81102808 | 1.660765004  | Up   | 1.53E-14  | 5.41E-14  | AAEL001656-PA OS=Aedes<br>aegypti GN=AAEL001656 PE=4<br>SV=1                                   |
| CCG027505.1 | 727  | 29   | 1062 | 1.71406094 | 51.06697377 | 4.896900259  | Up   | 6.66E-13  | 1.69E-12  | AAEL004492-PA OS=Aedes<br>aegypti GN=AAEL004492 PE=4<br>SV=1                                   |
| CCG017481.1 | 1808 | 84   | 1062 | 1.99638148 | 20.53412054 | 3.362563832  | Up   | 0         | 0         | AAEL014729-PA (Fragment)<br>OS=Aedes aegypti<br>GN=AAEL014729 PE=4 SV=1                        |
| CCG015523.1 | 1266 | 2194 | 1062 | 74.4672968 | 29.32518952 | -1.344466556 | Down | 1.03E-147 | 5.81E-147 | AAEL004023-PA OS=Aedes<br>aegypti GN=AAEL004023 PE=4<br>SV=1                                   |
| CCG025208.1 | 2580 | 31   | 1063 | 0.51630301 | 14.40335202 | 4.802042775  | Up   | 2.40E-13  | 6.76E-13  | AAEL011811-PA OS=Aedes<br>aegypti GN=AAEL011811 PE=3<br>SV=1                                   |
| CCG020098.1 | 801  | 121  | 1063 | 6.49105854 | 46.39281924 | 2.837375848  | Up   | 0         | 0         | -                                                                                              |
| CCG002368.1 | 642  | 180  | 1063 | 12.0475891 | 57.88262961 | 2.264385989  | Up   | 3.32E-13  | 9.06E-13  | AAEL004121-PA OS=Aedes<br>aegypti GN=AAEL004121 PE=4<br>SV=1                                   |
| CCG021707.1 | 3900 | 401  | 1063 | 4.41817015 | 9.528371336 | 1.108780659  | Up   | 1.05E-13  | 3.28E-13  | AAEL006958-PA OS=Aedes<br>aegypti GN=AAEL006958 PE=4<br>SV=1                                   |
| CCG021402.1 | 719  | 328  | 1064 | 19.6023268 | 51.73241514 | 1.400043635  | Up   | 1.92E-13  | 5.53E-13  | AAEL005928-PA OS=Aedes<br>aegypti GN=AAEL005928 PE=4<br>SV=1                                   |
| CCG021756.1 | 1293 | 349  | 1064 | 11.5981728 | 28.7669037  | 1.310512413  | Up   | 4.55E-14  | 1.54E-13  | Uncharacterized protein<br>OS=Anopheles darlingi<br>GN=AND_06292 PE=4 SV=1                     |
| CCG000915.1 | 2267 | 422  | 1064 | 7.99877724 | 16.40741354 | 1.036496451  | Up   | 5.52E-13  | 1.42E-12  | AAEL013058-PA OS=Aedes<br>aegypti GN=AAEL013058 PE=4<br>SV=1                                   |
| CCG002116.1 | 1143 | 24   | 1066 | 0.90225165 | 32.60325725 | 5.175342426  | Up   | 1.93E-11  | 4.23E-11  | AAEL010862-PA OS=Aedes<br>aegypti GN=AAEL010862 PE=4<br>SV=1                                   |
| CCG021456.1 | 2235 | 359  | 1066 | 6.9020737  | 16.6736121  | 1.272464893  | Up   | 0         | 0         | AAEL003519-PA OS=Aedes<br>aegypti GN=AAEL003519 PE=4<br>SV=1                                   |
| CCG003020.1 | 1434 | 412  | 1066 | 12.3455583 | 25.98711509 | 1.073804399  | Up   | 3.41E-13  | 9.25E-13  | AAEL010008-PA OS=Aedes<br>aegypti GN=AAEL010008 PE=4<br>SV=1                                   |

|             |      |      |      |            |             |              |      |           |           |                                                                       |
|-------------|------|------|------|------------|-------------|--------------|------|-----------|-----------|-----------------------------------------------------------------------|
| CCG026472.1 | 8151 | 2057 | 1066 | 10.8439141 | 4.571895846 | -1.246021152 | Down | 2.88E-123 | 1.59E-122 | AAEL011566-PA OS=Aedes aegypti GN=AAEL011566 PE=4 SV=1                |
| CCG006826.1 | 1546 | 146  | 1067 | 4.05794389 | 24.12709011 | 2.571833106  | Up   | 9.33E-15  | 3.34E-14  | AAEL011554-PA OS=Aedes aegypti GN=AAEL011554 PE=4 SV=1                |
| CCG011154.1 | 3073 | 94   | 1068 | 1.31440125 | 12.14950849 | 3.208420284  | Up   | 0         | 0         | Rituper OS=Culex quinquefasciatus GN=CpipJ_CPIJ004355 PE=4 SV=1       |
| CCG024556.1 | 1937 | 166  | 1068 | 3.68248629 | 19.27487847 | 2.387969704  | Up   | 1.83E-13  | 5.31E-13  | AAEL014906-PA (Fragment) OS=Aedes aegypti GN=AAEL014906 PE=4 SV=1     |
| CCG024384.1 | 3217 | 186  | 1068 | 2.48441736 | 11.60566975 | 2.223850324  | Up   | 6.43E-13  | 1.64E-12  | AAEL005480-PA OS=Aedes aegypti GN=AAEL005480 PE=4 SV=1                |
| CCG013203.1 | 1941 | 345  | 1068 | 7.63758807 | 19.23515693 | 1.332556584  | Up   | 9.59E-13  | 2.38E-12  | AGAP007911-PA (Fragment) OS=Anopheles gambiae GN=AGAP007911 PE=4 SV=3 |
| CCG013123.1 | 1569 | 129  | 1069 | 3.53288449 | 23.81797187 | 2.753132086  | Up   | 0         | 0         | AAEL012628-PA OS=Aedes aegypti GN=AAEL012628 PE=4 SV=1                |
| CCG027278.1 | 561  | 250  | 1069 | 19.1487231 | 66.61389995 | 1.798575057  | Up   | 2.10E-13  | 6.02E-13  | AAEL004379-PA OS=Aedes aegypti GN=AAEL004379 PE=4 SV=1                |
| CCG024170.1 | 2370 | 70   | 1071 | 1.26914828 | 15.79760102 | 3.637772952  | Up   | 0         | 0         | AAEL002647-PA OS=Aedes aegypti GN=AAEL002647 PE=4 SV=1                |
| CCG023262.1 | 1018 | 142  | 1071 | 5.99381367 | 36.77830493 | 2.617308849  | Up   | 2.62E-13  | 7.35E-13  | AAEL007167-PA OS=Aedes aegypti GN=AAEL007167 PE=4 SV=1                |
| CCG015738.1 | 1092 | 300  | 1072 | 11.8048721 | 34.31801529 | 1.539583704  | Up   | 1.10E-13  | 3.42E-13  | AAEL011826-PA OS=Aedes aegypti GN=AAEL011826 PE=4 SV=1                |
| CCG013636.1 | 2106 | 310  | 1072 | 6.32507964 | 17.79452645 | 1.492277989  | Up   | 2.14E-13  | 6.15E-13  | AAEL004936-PA OS=Aedes aegypti GN=AAEL004936 PE=4 SV=1                |
| CCG006523.1 | 1302 | 94   | 1074 | 3.10226963 | 28.83655089 | 3.21650263   | Up   | 0         | 0         | AAEL012100-PA OS=Aedes aegypti GN=AAEL012100 PE=4 SV=1                |
| CCG025389.1 | 1888 | 152  | 1074 | 3.45942779 | 19.88622312 | 2.523163968  | Up   | 8.39E-14  | 2.69E-13  | AAEL010001-PA OS=Aedes aegypti GN=AAEL010001 PE=4 SV=1                |
| CCG027269.1 | 444  | 193  | 1074 | 18.6782855 | 84.56123706 | 2.178634445  | Up   | 6.08E-14  | 2.02E-13  | AAEL004121-PA OS=Aedes aegypti GN=AAEL004121 PE=4 SV=1                |
| CCG011437.1 | 1215 | 216  | 1074 | 7.63906393 | 30.90139033 | 2.01620398   | Up   | 1.38E-13  | 4.17E-13  | AAEL000956-PA OS=Aedes aegypti GN=AAEL000956 PE=4 SV=1                |



|             |       |      |      |            |             |              |      |          |          |                                                              |
|-------------|-------|------|------|------------|-------------|--------------|------|----------|----------|--------------------------------------------------------------|
| CCG005887.1 | 729   | 13   | 1075 | 0.76626413 | 51.55027096 | 6.07199443   | Up   | 6.34E-08 | 1.23E-07 | NOS protein OS=Aedes aegypti<br>GN=nos PE=2 SV=1             |
| CCG004041.1 | 714   | 158  | 1075 | 9.50870878 | 52.63325985 | 2.4686534    | Up   | 0        | 0        | AAEL006473-PA OS=Aedes<br>aegypti GN=AAEL006473 PE=4<br>SV=1 |
| CCG020465.1 | 12599 | 325  | 1075 | 1.1084343  | 2.982788121 | 1.42813824   | Up   | 1.19E-13 | 3.65E-13 | AAEL014246-PA OS=Aedes<br>aegypti GN=AAEL014248 PE=4<br>SV=1 |
| CCG017784.1 | 2562  | 332  | 1075 | 5.56828723 | 14.66828553 | 1.397394717  | Up   | 0        | 0        | AAEL012470-PA OS=Aedes<br>aegypti GN=AAEL012470 PE=4<br>SV=1 |
| CCG014891.1 | 3710  | 433  | 1075 | 5.01506606 | 10.12941982 | 1.014210934  | Up   | 9.43E-13 | 2.34E-12 | AAEL009529-PA OS=Aedes<br>aegypti GN=AAEL009529 PE=4<br>SV=1 |
| CCG006993.1 | 715   | 436  | 1075 | 26.2025235 | 52.5596469  | 1.004249824  | Up   | 1.61E-13 | 4.76E-13 | AAEL007414-PA OS=Aedes<br>aegypti GN=AAEL007414 PE=4<br>SV=1 |
| CCG019031.1 | 1800  | 166  | 1076 | 3.96276441 | 20.897281   | 2.398736135  | Up   | 1.83E-13 | 5.32E-13 | AAEL010596-PA OS=Aedes<br>aegypti GN=AAEL010598 PE=4<br>SV=1 |
| CCG018245.1 | 1017  | 403  | 1076 | 17.0273383 | 36.98633806 | 1.119139538  | Up   | 0        | 0        | AAEL011560-PA OS=Aedes<br>aegypti GN=AAEL011560 PE=4<br>SV=1 |
| CCG018623.1 | 1718  | 30   | 1077 | 0.75034461 | 21.91505476 | 4.868225143  | Up   | 3.71E-13 | 9.93E-13 | AAEL002036-PA OS=Aedes<br>aegypti GN=AAEL002036 PE=4<br>SV=1 |
| CCG000982.1 | 531   | 118  | 1077 | 9.54882991 | 70.90407549 | 2.892472689  | Up   | 0        | 0        | AAEL008843-PA OS=Aedes<br>aegypti GN=AAEL008843 PE=4<br>SV=1 |
| CCG005375.1 | 1625  | 188  | 1077 | 4.97126776 | 23.16927021 | 2.220526887  | Up   | 1.80E-13 | 5.24E-13 | AAEL011995-PA OS=Aedes<br>aegypti GN=AAEL011995 PE=4<br>SV=1 |
| CCG013470.2 | 858   | 4936 | 1077 | 247.201177 | 43.88119357 | -2.494010941 | Down | 0        | 0        | -                                                            |
| CCG007784.1 | 1125  | 102  | 1078 | 3.8959226  | 33.49779765 | 3.104029325  | Up   | 0        | 0        | AAEL014388-PA OS=Aedes<br>aegypti GN=AAEL014388 PE=4<br>SV=1 |
| CCG020628.1 | 601   | 7004 | 1078 | 500.765426 | 62.70386416 | -2.997508702 | Down | 0        | 0        | AAEL005536-PA OS=Aedes<br>aegypti GN=AAEL005538 PE=4<br>SV=1 |
| CCG027731.1 | 1224  | 114  | 1079 | 4.00208313 | 30.81697764 | 2.944902339  | Up   | 8.48E-14 | 2.70E-13 | AAEL014159-PA OS=Aedes<br>aegypti GN=AAEL014159 PE=4<br>SV=1 |
| CCG007330.1 | 2004  | 232  | 1079 | 4.97454013 | 18.82234563 | 1.919811358  | Up   | 2.91E-13 | 8.05E-13 | AAEL000004-PA OS=Aedes<br>aegypti GN=AAEL000004 PE=4<br>SV=1 |
| CCG017450.1 | 2040  | 326  | 1079 | 6.8667321  | 18.49018659 | 1.429064199  | Up   | 6.17E-13 | 1.57E-12 | AAEL013208-PA OS=Aedes<br>aegypti GN=AAEL013208 PE=4<br>SV=1 |
| CCG011605.1 | 1384  | 7678 | 1079 | 238.382675 | 27.25432127 | -3.128722492 | Down | 0        | 0        | AAEL009414-PA OS=Aedes<br>aegypti GN=AAEL009414 PE=4<br>SV=1 |

|             |       |      |      |            |             |              |      |          |          |                                                                                                                        |
|-------------|-------|------|------|------------|-------------|--------------|------|----------|----------|------------------------------------------------------------------------------------------------------------------------|
| CCG017771.1 | 1032  | 86   | 1080 | 3.58081122 | 36.58424313 | 3.352864046  | Up   | 0        | 0        | Replication factor C subunit 2<br>OS=Culex quinquefasciatus<br>GN=CpipJ_CPIJ000302 PE=4<br>SV=1                        |
| CCG021648.1 | 1582  | 4624 | 1080 | 125.595482 | 23.86532169 | -2.395796882 | Down | 0        | 0        | AAEL000526-PA OS=Aedes<br>aegypti GN=AAEL000328 PE=4<br>SV=1                                                           |
| CCG003579.1 | 798   | 39   | 1081 | 2.10002462 | 47.35576089 | 4.495061793  | Up   | 7.33E-14 | 2.38E-13 | -                                                                                                                      |
| CCG003423.1 | 897   | 126  | 1081 | 6.03588245 | 42.12920534 | 2.803184088  | Up   | 1.34E-13 | 4.06E-13 | AAEL008849-PA OS=Aedes<br>aegypti GN=AAEL008849 PE=4<br>SV=1                                                           |
| CCG012549.1 | 1888  | 384  | 1081 | 8.73960704 | 20.01583538 | 1.195501511  | Up   | 1.03E-12 | 2.55E-12 | AAEL002805-PA OS=Aedes<br>aegypti GN=AAEL002805 PE=4<br>SV=1                                                           |
| CCG023275.1 | 582   | 125  | 1082 | 9.22889489 | 64.9911606  | 2.816013703  | Up   | 2.35E-14 | 8.22E-14 | AAEL013274-PA OS=Aedes<br>aegypti GN=AAEL013274 PE=3<br>SV=1                                                           |
| CCG000398.2 | 1435  | 169  | 1082 | 5.06054714 | 26.3587843  | 2.380918551  | Up   | 0        | 0        | AAEL008406-PA OS=Aedes<br>aegypti GN=AAEL008408 PE=4<br>SV=1                                                           |
| CCG008527.1 | 1797  | 205  | 1082 | 4.90194524 | 21.04889008 | 2.102317888  | Up   | 1.83E-13 | 5.31E-13 | AAEL010006-PA OS=Aedes<br>aegypti GN=AAEL010006 PE=4<br>SV=1                                                           |
| CCG021269.1 | 2732  | 370  | 1082 | 5.81947357 | 13.84511547 | 1.250416527  | Up   | 0        | 0        | AAEL005080-PA OS=Aedes<br>aegypti GN=AAEL005080 PE=4<br>SV=1                                                           |
| CCG010778.1 | 1457  | 29   | 1083 | 0.85526582 | 25.98477265 | 4.925149736  | Up   | 6.66E-13 | 1.69E-12 | Eukaryotic translation initiation<br>factor 4 gamma 3 OS=Culex<br>quinquefasciatus<br>GN=CpipJ_CPIJ009979 PE=4<br>SV=1 |
| CCG017620.1 | 5136  | 275  | 1084 | 2.30075487 | 7.37826558  | 1.681174437  | Up   | 4.31E-13 | 1.14E-12 | AAEL014900-PA OS=Aedes<br>aegypti GN=AAEL014900 PE=4<br>SV=1                                                           |
| CCG001756.1 | 3493  | 231  | 1085 | 2.84168586 | 10.85878337 | 1.93404349   | Up   | 1.29E-13 | 3.97E-13 | AAEL004538-PA OS=Aedes<br>aegypti GN=AAEL004538 PE=3<br>SV=1                                                           |
| CCG012948.1 | 1647  | 413  | 1085 | 10.7750458 | 23.02958731 | 1.09579456   | Up   | 5.88E-13 | 1.51E-12 | AAEL006372-PA OS=Aedes<br>aegypti GN=AAEL006372 PE=4<br>SV=1                                                           |
| CCG002449.1 | 1386  | 111  | 1086 | 3.44129909 | 27.3915502  | 2.992705725  | Up   | 0        | 0        | AAEL012140-PA OS=Aedes<br>aegypti GN=AAEL012140 PE=4<br>SV=1                                                           |
| CCG003026.1 | 3363  | 316  | 1086 | 4.03759623 | 11.28893505 | 1.483340843  | Up   | 3.23E-13 | 8.83E-13 | AAEL009096-PA OS=Aedes<br>aegypti GN=AAEL009096 PE=4<br>SV=1                                                           |
| CCG019947.1 | 12702 | 423  | 1086 | 1.43097132 | 2.988874868 | 1.062607739  | Up   | 1.18E-13 | 3.65E-13 | AAEL012583-PA (Fragment)<br>OS=Aedes aegypti<br>GN=AAEL012583 PE=4 SV=1                                                |

|             |      |      |      |            |             |              |      |           |           |                                                                                          |
|-------------|------|------|------|------------|-------------|--------------|------|-----------|-----------|------------------------------------------------------------------------------------------|
| CCG008742.1 | 953  | 180  | 1087 | 8.11600444 | 39.87371128 | 2.296596333  | Up   | 3.32E-13  | 9.05E-13  | Ecdysteroid receptor OS=Aedes albopictus GN=EcR PE=2 SV=1                                |
| CCG015807.1 | 2493 | 431  | 1087 | 7.42878284 | 15.24253785 | 1.03690537   | Up   | 0         | 0         | Diacylglycerol kinase zeta OS=Culex quinquefasciatus GN=CpipJ_CPIJ018790 PE=4 SV=1       |
| CCG005877.1 | 2217 | 175  | 1088 | 3.39183742 | 17.15588865 | 2.338564933  | Up   | 3.55E-13  | 9.57E-13  | Putative uncharacterized protein OS=Culex quinquefasciatus GN=CpipJ_CPIJ005943 PE=4 SV=1 |
| CCG018216.1 | 966  | 267  | 1088 | 11.8767279 | 39.37329723 | 1.729080113  | Up   | 5.21E-13  | 1.35E-12  | AAEL001166-PA OS=Aedes aegypti GN=AAEL001166 PE=4 SV=1                                   |
| CCG013272.2 | 8127 | 2395 | 1088 | 12.6630386 | 4.680030162 | -1.436033896 | Down | 5.36E-178 | 3.13E-177 | AAEL010210-PA OS=Aedes aegypti GN=AAEL010210 PE=4 SV=1                                   |
| CCG022927.1 | 2667 | 109  | 1089 | 1.75616838 | 14.27430199 | 3.022917118  | Up   | 0         | 0         | AAEL001497-PA (Fragment) OS=Aedes aegypti GN=AAEL001497 PE=4 SV=1                        |
| CCG005400.1 | 3663 | 260  | 1089 | 3.04999481 | 10.3930012  | 1.76873363   | Up   | 3.22E-13  | 8.82E-13  | AAEL009430-PA OS=Aedes aegypti GN=AAEL009430 PE=4 SV=1                                   |
| CCG024478.1 | 999  | 7    | 1090 | 0.30108923 | 38.14266435 | 6.985070701  | Up   | 4.31E-06  | 7.70E-06  | Long form D7Bclu1 salivary protein d711 OS=Aedes albopictus PE=2 SV=1                    |
| CCG016482.1 | 2023 | 95   | 1090 | 2.01785704 | 18.83565086 | 3.222570015  | Up   | 0         | 0         | AAEL006640-PA OS=Aedes aegypti GN=AAEL006640 PE=3 SV=1                                   |
| CCG020589.1 | 1724 | 204  | 1090 | 5.08458577 | 22.10239077 | 2.120000282  | Up   | 6.59E-14  | 2.17E-13  | tRNA pseudouridine synthase OS=Aedes aegypti GN=AAEL004663 PE=3 SV=1                     |
| CCG019521.1 | 3789 | 116  | 1091 | 1.31551576 | 10.06584322 | 2.935767595  | Up   | 1.16E-13  | 3.59E-13  | AAEL008033-PA OS=Aedes aegypti GN=AAEL008035 PE=4 SV=1                                   |
| CCG003602.1 | 3459 | 240  | 1091 | 2.98142131 | 11.02615784 | 1.886857995  | Up   | 0         | 0         | AAEL013280-PA OS=Aedes aegypti GN=AAEL013280 PE=4 SV=1                                   |
| CCG018531.1 | 1188 | 278  | 1091 | 10.0552073 | 32.10393936 | 1.674807517  | Up   | 2.11E-14  | 7.39E-14  | AAEL008687-PA OS=Aedes aegypti GN=AAEL008687 PE=4 SV=1                                   |
| CCG021139.2 | 696  | 326  | 1091 | 20.1266286 | 54.79810339 | 1.445020436  | Up   | 6.17E-13  | 1.57E-12  | AAEL004480-PA OS=Aedes aegypti GN=AAEL004480 PE=4 SV=1                                   |

|             |       |      |      |            |             |              |      |           |           |                                                                                        |
|-------------|-------|------|------|------------|-------------|--------------|------|-----------|-----------|----------------------------------------------------------------------------------------|
| CCG021902.1 | 1437  | 378  | 1091 | 11.3031035 | 26.54104381 | 1.231506166  | Up   | 1.08E-12  | 2.65E-12  | G-protein signaling modulator OS=Culex quinquefasciatus GN=CpipJ_CPIJ010095 PE=4 SV=1  |
| CCG015167.1 | 3549  | 155  | 1092 | 1.87667198 | 10.75639285 | 2.518945939  | Up   | 3.42E-13  | 9.28E-13  | Structural maintenance of chromosomes protein OS=Aedes aegypti GN=AAEL003449 PE=3 SV=1 |
| CCG000385.1 | 4929  | 229  | 1092 | 1.99636219 | 7.744864726 | 1.955866557  | Up   | 2.46E-13  | 6.93E-13  | AAEL010373-PA OS=Aedes aegypti GN=AAEL010373 PE=4 SV=1                                 |
| CCG005161.1 | 1400  | 272  | 1093 | 8.34840558 | 27.29242608 | 1.708928048  | Up   | 5.36E-13  | 1.38E-12  | AAEL011058-PA (Fragment) OS=Aedes aegypti GN=AAEL011058 PE=4 SV=1                      |
| CCG019869.1 | 3551  | 409  | 1093 | 4.94920345 | 10.76017925 | 1.120433857  | Up   | 3.15E-13  | 8.65E-13  | AAEL003443-PA OS=Aedes aegypti GN=AAEL003445 PE=4 SV=1                                 |
| CCG013473.1 | 14730 | 2921 | 1093 | 8.52101798 | 2.593984828 | -1.715855753 | Down | 4.24E-281 | 2.65E-280 | AAEL003941-PA OS=Aedes aegypti GN=AAEL003941 PE=4 SV=1                                 |
| CCG005026.1 | 2367  | 104  | 1094 | 1.88798158 | 16.15731085 | 3.097270508  | Up   | 0         | 0         | AAEL013110-PA OS=Aedes aegypti GN=AAEL013110 PE=4 SV=1                                 |
| CCG024600.1 | 1281  | 212  | 1094 | 7.11130659 | 29.8550779  | 2.069789772  | Up   | 0         | 0         | AAEL005521-PA OS=Aedes aegypti GN=AAEL005521 PE=4 SV=1                                 |
| CCG016308.1 | 1044  | 426  | 1094 | 17.5336273 | 36.63252374 | 1.063000606  | Up   | 4.37E-13  | 1.15E-12  | AAEL013898-PA OS=Aedes aegypti GN=AAEL013898 PE=4 SV=1                                 |
| CCG010483.1 | 954   | 0    | 1095 | 0.001      | 40.12506611 | 15.29221615  | Up   | 4.44E-16  | 1.65E-15  | AAEL013300-PA OS=Aedes aegypti GN=AAEL013300 PE=4 SV=1                                 |
| CCG022679.2 | 2834  | 196  | 1096 | 2.97179534 | 13.51950294 | 2.185635443  | Up   | 7.93E-14  | 2.55E-13  | AAEL008095-PA OS=Aedes aegypti GN=AAEL008095 PE=4 SV=1                                 |
| CCG013961.1 | 2067  | 104  | 1097 | 2.16199923 | 18.55308641 | 3.101221296  | Up   | 0         | 0         | AAEL010167-PA OS=Aedes aegypti GN=AAEL010167 PE=4 SV=1                                 |
| CCG014846.1 | 1663  | 207  | 1097 | 5.34860798 | 23.06027037 | 2.108174057  | Up   | 6.88E-15  | 2.47E-14  | AAEL010323-PA OS=Aedes aegypti GN=AAEL010323 PE=4 SV=1                                 |
| CCG012558.1 | 2185  | 256  | 1097 | 5.0344403  | 17.55113484 | 1.801661014  | Up   | 0         | 0         | AAEL011697-PA OS=Aedes aegypti GN=AAEL011697 PE=3 SV=1                                 |

|             |      |      |      |            |             |              |      |          |          |                                                                                                           |
|-------------|------|------|------|------------|-------------|--------------|------|----------|----------|-----------------------------------------------------------------------------------------------------------|
| CCG010656.1 | 1623 | 176  | 1099 | 4.6596878  | 23.67168587 | 2.344857256  | Up   | 0        | 0        | Gastrin zinc finger protein<br>XLCGF26.1 OS=Culex<br>quinquefasciatus<br>GN=CpipJ_CPIJ006180 PE=4<br>SV=1 |
| CCG025357.1 | 1623 | 234  | 1099 | 6.19526673 | 23.67168587 | 1.933924155  | Up   | 4.60E-13 | 1.20E-12 | AAEL002162-PA OS=Aedes<br>aegypti GN=AAEL002182 PE=4<br>SV=1                                              |
| CCG015795.1 | 1101 | 346  | 1099 | 13.5036587 | 34.894774   | 1.369660647  | Up   | 2.24E-13 | 6.40E-13 | AAEL005646-PA OS=Aedes<br>aegypti GN=AAEL005646 PE=4<br>SV=1                                              |
| CCG016798.1 | 914  | 134  | 1100 | 6.29972039 | 42.07232434 | 2.739511822  | Up   | 0        | 0        | AAEL005344-PA OS=Aedes<br>aegypti GN=AAEL005344 PE=4<br>SV=1                                              |
| CCG002994.1 | 1423 | 5608 | 1100 | 169.342426 | 27.02326384 | -2.647669622 | Down | 0        | 0        | AAEL005630-PA OS=Aedes<br>aegypti GN=AAEL003630 PE=4<br>SV=1                                              |
| CCG020807.1 | 1262 | 264  | 1101 | 8.98891437 | 30.49846492 | 1.762517838  | Up   | 0        | 0        | AAEL001166-PA OS=Aedes<br>aegypti GN=AAEL001166 PE=4<br>SV=1                                              |
| CCG022012.1 | 544  | 230  | 1102 | 18.167351  | 70.81621508 | 1.962731661  | Up   | 3.85E-13 | 1.03E-12 | Strain nuclear nonnucleoprotein<br>SM D3 OS=Culex<br>quinquefasciatus<br>GN=CpipJ_CPIJ005588 PE=4<br>SV=1 |
| CCG004221.1 | 1785 | 345  | 1102 | 8.30507476 | 21.5820846  | 1.377769161  | Up   | 9.59E-13 | 2.38E-12 | AGAP003794-PA OS=Anopheles<br>gambiae GN=AgaP_AGAP003794<br>PE=4 SV=5                                     |
| CCG023948.1 | 2166 | 97   | 1103 | 1.92431406 | 17.80192949 | 3.209617437  | Up   | 3.62E-14 | 1.25E-13 | AAEL006125-PA OS=Aedes<br>aegypti GN=AAEL006125 PE=4<br>SV=1                                              |
| CCG024155.1 | 897  | 241  | 1104 | 11.5448228 | 43.02557141 | 1.897948324  | Up   | 2.37E-13 | 6.72E-13 | AGAP011766-PA (Fragment)<br>OS=Anopheles gambiae<br>GN=AGAP011766 PE=3 SV=2                               |
| CCG006360.1 | 2802 | 421  | 1105 | 6.45619496 | 13.78618695 | 1.094467435  | Up   | 4.57E-13 | 1.20E-12 | AAEL008714-PA OS=Aedes<br>aegypti GN=AAEL008714 PE=4<br>SV=1                                              |
| CCG027196.1 | 852  | 22   | 1106 | 1.10954714 | 45.38011046 | 5.354017255  | Up   | 8.38E-11 | 1.80E-10 | AAEL011906-PA OS=Aedes<br>aegypti GN=AAEL011906 PE=3<br>SV=1                                              |
| CCG007336.1 | 2010 | 29   | 1107 | 0.61996135 | 19.25314049 | 4.956771715  | Up   | 6.66E-13 | 1.69E-12 | AAEL007457-PA OS=Aedes<br>aegypti GN=AAEL007457 PE=4<br>SV=1                                              |
| CCG003062.1 | 2978 | 134  | 1107 | 1.93349377 | 12.99490006 | 2.74866352   | Up   | 0        | 0        | Protein translocase subunit secA<br>OS=Harpegnathos saltator<br>GN=EAI_00772 PE=4 SV=1                    |

|             |      |      |      |            |             |              |      |           |           |                                                                                          |
|-------------|------|------|------|------------|-------------|--------------|------|-----------|-----------|------------------------------------------------------------------------------------------|
| CCG019051.2 | 1216 | 2293 | 1107 | 81.0276328 | 31.82468124 | -1.348267929 | Down | 5.86E-155 | 3.35E-154 | AAEL006918-PA OS=Aedes aegypti GN=AAEL006918 PE=4 SV=1                                   |
| CCG008364.1 | 1341 | 2498 | 1107 | 80.0435474 | 28.85817479 | -1.471805051 | Down | 1.56E-192 | 9.28E-192 | Putative night chain OS=Culex quinquefasciatus GN=CpipJ_CPIJ010990 PE=4 SV=1             |
| CCG005191.1 | 1314 | 2969 | 1107 | 97.0906713 | 29.45115098 | -1.721008667 | Down | 6.70E-287 | 4.19E-286 | Synaptotagmin I isoform A OS=Culex pipiens GN=sytl PE=2 SV=1                             |
| CCG020638.1 | 1374 | 216  | 1108 | 6.75506745 | 28.19051722 | 2.061167868  | Up   | 1.38E-13  | 4.17E-13  | AAEL001412-PA OS=Aedes aegypti GN=AAEL001412 PE=4 SV=1                                   |
| CCG000450.1 | 2610 | 237  | 1108 | 3.90184946 | 14.84052516 | 1.927312121  | Up   | 2.32E-13  | 6.62E-13  | Putative uncharacterized protein OS=Culex quinquefasciatus GN=CpipJ_CPIJ012359 PE=4 SV=1 |
| CCG024718.1 | 4086 | 2426 | 1108 | 25.5126227 | 9.479630608 | -1.428308465 | Down | 8.09E-179 | 4.74E-178 | AAEL008495-PA OS=Aedes aegypti GN=AAEL008495 PE=4 SV=1                                   |
| CCG002250.2 | 3157 | 227  | 1109 | 3.08968317 | 12.28024357 | 1.990808367  | Up   | 0         | 0         | AAEL009878-PA OS=Aedes aegypti GN=AAEL009878 PE=4 SV=1                                   |
| CCG010821.1 | 2697 | 307  | 1109 | 4.8912527  | 14.37476045 | 1.555262009  | Up   | 0         | 0         | AAEL002446-PA (Fragment) OS=Aedes aegypti GN=AAEL002446 PE=4 SV=1                        |
| CCG013885.1 | 2168 | 124  | 1110 | 2.45767855 | 17.89837971 | 2.864460855  | Up   | 1.61E-13  | 4.76E-13  | AAEL002098-PA (Fragment) OS=Aedes aegypti GN=AAEL002098 PE=4 SV=1                        |
| CCG018830.1 | 2115 | 291  | 1110 | 5.91214788 | 18.34689703 | 1.633781822  | Up   | 6.00E-14  | 2.00E-13  | AAEL000884-PA OS=Aedes aegypti GN=AAEL000884 PE=4 SV=1                                   |
| CCG023490.1 | 2376 | 1978 | 1110 | 35.7719424 | 16.33151819 | -1.131169546 | Down | 7.37E-102 | 3.91E-101 | AAEL000485-PA OS=Aedes aegypti GN=AAEL000485 PE=4 SV=1                                   |
| CCG009952.2 | 5464 | 4277 | 1110 | 33.6349844 | 7.10169971  | -2.243726327 | Down | 0         | 0         | AAEL012587-PA OS=Aedes aegypti GN=AAEL012587 PE=4 SV=1                                   |
| CCG016440.1 | 2541 | 73   | 1111 | 1.23447093 | 15.28478768 | 3.630131746  | Up   | 0         | 0         | AAEL004368-PA OS=Aedes aegypti GN=AAEL004368 PE=4 SV=1                                   |
| CCG016663.1 | 2319 | 159  | 1111 | 2.94617844 | 16.74801444 | 2.50707335   | Up   | 5.53E-14  | 1.84E-13  | AAEL000439-PA OS=Aedes aegypti GN=AAEL000439 PE=4 SV=1                                   |
| CCG020635.1 | 4341 | 260  | 1111 | 2.57363073 | 8.946935152 | 1.797588492  | Up   | 3.22E-13  | 8.81E-13  | AAEL001397-PA OS=Aedes aegypti GN=AAEL001397 PE=3 SV=1                                   |

|             |      |      |      |            |             |              |      |          |          |                                                                                                   |
|-------------|------|------|------|------------|-------------|--------------|------|----------|----------|---------------------------------------------------------------------------------------------------|
| CCG026475.1 | 2010 | 341  | 1111 | 7.2898903  | 19.3227092  | 1.406328376  | Up   | 2.98E-13 | 8.25E-13 | Putative uncharacterized protein<br>OS=Culex quinquefasciatus<br>GN=CpipJ_CPIJ002173 PE=4<br>SV=1 |
| CCG006511.1 | 2810 | 104  | 1112 | 1.59033893 | 13.83402269 | 3.120814558  | Up   | 0        | 0        | AAEL009242-PA OS=Aedes<br>aegypti GN=AAEL009242 PE=4<br>SV=1                                      |
| CCG024251.1 | 1816 | 169  | 1112 | 3.99883543 | 21.40616948 | 2.42037484   | Up   | 0        | 0        | AAEL003771-PA OS=Aedes<br>aegypti GN=AAEL003771 PE=4<br>SV=1                                      |
| CCG024868.1 | 6414 | 417  | 1112 | 2.79363569 | 6.060742714 | 1.117350703  | Up   | 0        | 0        | AAEL013079-PA (Fragment)<br>OS=Aedes aegypti<br>GN=AAEL013079 PE=4 SV=1                           |
| CCG024218.1 | 2370 | 155  | 1113 | 2.8102569  | 16.41711479 | 2.546426676  | Up   | 3.42E-13 | 9.26E-13 | AAEL000003-PA OS=Aedes<br>aegypti GN=AAEL000003 PE=4<br>SV=1                                      |
| CCG017477.1 | 2876 | 313  | 1113 | 4.67646973 | 13.52870725 | 1.532532234  | Up   | 0        | 0        | Chloride channel protein 7<br>OS=Culex quinquefasciatus<br>GN=CpipJ_CPIJ008618 PE=4<br>SV=1       |
| CCG000907.1 | 956  | 401  | 1113 | 18.0239159 | 40.69933269 | 1.175092655  | Up   | 1.05E-13 | 3.28E-13 | AAEL004854-PA OS=Aedes<br>aegypti GN=AAEL004854 PE=4<br>SV=1                                      |
| CCG004820.1 | 1404 | 146  | 1114 | 4.46836272 | 27.73755009 | 2.634022162  | Up   | 9.33E-15 | 3.34E-14 | AGAP002348-PA OS=Anopheles<br>gambiae GN=AgaP_AGAP002348<br>PE=4 SV=5                             |
| CCG001395.1 | 1048 | 189  | 1114 | 7.74931283 | 37.15984764 | 2.261604297  | Up   | 2.34E-13 | 6.65E-13 | AAEL008700-PA OS=Aedes<br>aegypti GN=AAEL008700 PE=4<br>SV=1                                      |
| CCG007645.1 | 2176 | 260  | 1115 | 5.13425138 | 17.91290377 | 1.802773386  | Up   | 3.22E-13 | 8.81E-13 | AAEL001282-PA OS=Aedes<br>aegypti GN=AAEL001282 PE=4<br>SV=1                                      |
| CCG005429.3 | 906  | 231  | 1116 | 10.9558595 | 43.06118861 | 1.974685474  | Up   | 1.29E-13 | 3.97E-13 | AAEL000042-PA OS=Aedes<br>aegypti GN=AAEL000042 PE=4<br>SV=1                                      |
| CCG007422.1 | 966  | 3951 | 1116 | 175.748883 | 40.38658062 | -2.121567615 | Down | 0        | 0        | AAEL004118-PA OS=Aedes<br>aegypti GN=AAEL004118 PE=4<br>SV=1                                      |
| CCG008997.1 | 1881 | 295  | 1117 | 6.73900676 | 20.75938073 | 1.62315553   | Up   | 2.32E-13 | 6.62E-13 | AAEL003248-PA OS=Aedes<br>aegypti GN=AAEL003248 PE=4<br>SV=1                                      |
| CCG002881.1 | 666  | 421  | 1117 | 27.16255   | 58.63122396 | 1.110050251  | Up   | 4.57E-13 | 1.20E-12 | AAEL009713-PA OS=Aedes<br>aegypti GN=AAEL009713 PE=4<br>SV=1                                      |
| CCG004762.2 | 1742 | 205  | 1118 | 5.05671389 | 22.43590897 | 2.149537577  | Up   | 1.83E-13 | 5.30E-13 | AGAP002258-PB OS=Anopheles<br>gambiae GN=AgaP_AGAP002258<br>PE=4 SV=1                             |

|             |      |     |      |            |             |             |    |          |          |                                                                   |
|-------------|------|-----|------|------------|-------------|-------------|----|----------|----------|-------------------------------------------------------------------|
| CCG021278.1 | 1530 | 207 | 1118 | 5.81355233 | 25.54467545 | 2.135530719 | Up | 6.88E-15 | 2.47E-14 | AAEL010665-PA OS=Aedes aegypti GN=AAEL010665 PE=4 SV=1            |
| CCG026152.1 | 1177 | 272 | 1118 | 9.93013408 | 33.20590776 | 1.741554835 | Up | 5.36E-13 | 1.38E-12 | AAEL003864-PA OS=Aedes aegypti GN=AAEL003864 PE=4 SV=1            |
| CCG019634.1 | 1482 | 223 | 1119 | 6.46575629 | 26.39562194 | 2.029407625 | Up | 0        | 0        | AAEL014037-PA OS=Aedes aegypti GN=AAEL014037 PE=4 SV=1            |
| CCG009599.1 | 2886 | 321 | 1119 | 4.77937797 | 13.55450856 | 1.503878038 | Up | 0        | 0        | AAEL010577-PA OS=Aedes aegypti GN=AAEL010577 PE=4 SV=1            |
| CCG022821.1 | 1072 | 22  | 1120 | 0.88184157 | 36.52357275 | 5.372164602 | Up | 8.38E-11 | 1.80E-10 | -                                                                 |
| CCG022066.1 | 758  | 38  | 1120 | 2.15415556 | 51.65339048 | 4.583668707 | Up | 4.26E-14 | 1.45E-13 | AAEL004624-PA OS=Aedes aegypti GN=AAEL004624 PE=4 SV=1            |
| CCG016912.1 | 1095 | 64  | 1120 | 2.51147307 | 35.75641095 | 3.831596221 | Up | 0        | 0        | AAEL011738-PA OS=Aedes aegypti GN=AAEL011738 PE=4 SV=1            |
| CCG025859.1 | 2735 | 224 | 1121 | 3.51927625 | 14.32841984 | 2.025528845 | Up | 2.04E-13 | 5.88E-13 | AAEL000707-PA OS=Aedes aegypti GN=AAEL000707 PE=4 SV=1            |
| CCG028528.2 | 2128 | 299 | 1121 | 6.03757079 | 18.4155208  | 1.608882092 | Up | 4.80E-13 | 1.25E-12 | AAEL014389-PA OS=Aedes aegypti GN=AAEL014389 PE=4 SV=1            |
| CCG015846.1 | 1938 | 424 | 1121 | 9.40101521 | 20.22096402 | 1.104963312 | Up | 0        | 0        | AAEL005009-PA OS=Aedes aegypti GN=AAEL005009 PE=4 SV=1            |
| CCG019595.1 | 1401 | 115 | 1122 | 3.52713739 | 27.99656427 | 2.988680113 | Up | 6.13E-14 | 2.03E-13 | AAEL007356-PA OS=Aedes aegypti GN=AAEL007356 PE=4 SV=1            |
| CCG013437.1 | 1282 | 288 | 1122 | 9.65310731 | 30.59530931 | 1.664245163 | Up | 0        | 0        | AAEL003491-PA OS=Aedes aegypti GN=AAEL003491 PE=3 SV=1            |
| CCG026088.1 | 3795 | 389 | 1122 | 4.40453933 | 10.33549052 | 1.230543819 | Up | 0        | 0        | AAEL012508-PA OS=Aedes aegypti GN=AAEL012508 PE=4 SV=1            |
| CCG009002.1 | 2904 | 303 | 1123 | 4.48341239 | 13.51864491 | 1.592281433 | Up | 1.37E-13 | 4.14E-13 | AAEL004477-PA OS=Aedes aegypti GN=AAEL004477 PE=3 SV=1            |
| CCG017953.2 | 5029 | 141 | 1124 | 1.20475891 | 7.813303458 | 2.697188172 | Up | 0        | 0        | AAEL007468-PA OS=Aedes aegypti GN=AAEL007468 PE=4 SV=1            |
| CCG017911.1 | 1630 | 144 | 1124 | 3.79609925 | 24.10619822 | 2.666814523 | Up | 7.53E-14 | 2.44E-13 | AAEL004128-PA OS=Aedes aegypti GN=AAEL004128 PE=4 SV=1            |
| CCG001790.1 | 3885 | 136 | 1125 | 1.50421722 | 10.12305312 | 2.750559649 | Up | 1.70E-13 | 4.99E-13 | AAEL002465-PA (Fragment) OS=Aedes aegypti GN=AAEL002465 PE=4 SV=1 |



|             |       |      |      |            |             |              |      |           |           |                                                                                           |
|-------------|-------|------|------|------------|-------------|--------------|------|-----------|-----------|-------------------------------------------------------------------------------------------|
| CCG018560.1 | 3088  | 201  | 1125 | 2.79692897 | 12.73577117 | 2.186970799  | Up   | 0         | 0         | AAEL002238-PA OS=Aedes aegypti GN=AAEL002238 PE=4 SV=1                                    |
| CCG002261.1 | 1367  | 44   | 1126 | 1.38307851 | 28.79518628 | 4.379872697  | Up   | 3.91E-14  | 1.34E-13  | AAEL007554-PA OS=Aedes aegypti GN=AAEL007554 PE=4 SV=1                                    |
| CCG000978.1 | 1350  | 121  | 1126 | 3.8513614  | 29.15779233 | 2.920441079  | Up   | 0         | 0         | AAEL012414-PA OS=Aedes aegypti GN=AAEL012414 PE=4 SV=1                                    |
| CCG011087.1 | 414   | 244  | 1126 | 25.3251576 | 95.0797576  | 1.908566978  | Up   | 2.78E-13  | 7.73E-13  | AAEL012840-PA OS=Aedes aegypti GN=AAEL012840 PE=4 SV=1                                    |
| CCG020834.1 | 6410  | 2506 | 1126 | 16.7990881 | 6.1408767   | -1.451866383 | Down | 3.05E-189 | 1.81E-188 | -                                                                                         |
| CCG004390.2 | 1992  | 384  | 1127 | 8.28332233 | 19.77810137 | 1.255622503  | Up   | 1.03E-12  | 2.55E-12  | AAEL009686-PA (Fragment) OS=Aedes aegypti GN=AAEL009686 PE=4 SV=1                         |
| CCG014167.1 | 1777  | 395  | 1127 | 9.5515167  | 22.17106242 | 1.214876161  | Up   | 0         | 0         | AAEL002836-PA (Fragment) OS=Aedes aegypti GN=AAEL002836 PE=4 SV=1                         |
| CCG011474.1 | 14145 | 3315 | 1127 | 10.0703196 | 2.785293596 | -1.854208151 | Down | 0         | 0         | Putative uncharacterized protein (Fragment) OS=Solenopsis invicta GN=SINV_05561 PE=3 SV=1 |
| CCG014331.1 | 1486  | 51   | 1128 | 1.47473517 | 26.53629623 | 4.169439214  | Up   | 0         | 0         | AAEL013891-PA OS=Aedes aegypti GN=AAEL013891 PE=4 SV=1                                    |
| CCG014840.1 | 1700  | 84   | 1128 | 2.12321042 | 23.19584482 | 3.449547133  | Up   | 0         | 0         | AAEL011701-PA OS=Aedes aegypti GN=AAEL011701 PE=4 SV=1                                    |
| CCG006294.1 | 1494  | 353  | 1129 | 10.1528222 | 26.41760005 | 1.379618601  | Up   | 0         | 0         | AAEL011551-PA OS=Aedes aegypti GN=AAEL011551 PE=4 SV=1                                    |
| CCG017051.1 | 1671  | 369  | 1129 | 9.48882829 | 23.61932644 | 1.315665969  | Up   | 0         | 0         | AAEL008819-PA OS=Aedes aegypti GN=AAEL008819 PE=4 SV=1                                    |
| CCG010536.1 | 303   | 3154 | 1129 | 447.28232  | 130.2570775 | -1.77982397  | Down | 0         | 0         | AAEL013960-PA OS=Aedes aegypti GN=AAEL013960 PE=4 SV=1                                    |
| CCG014316.1 | 264   | 3812 | 1129 | 620.456926 | 149.4996003 | -2.053189429 | Down | 0         | 0         | AAEL009214-PA OS=Aedes aegypti GN=AAEL009214 PE=4 SV=1                                    |
| CCG016274.1 | 1129  | 139  | 1130 | 5.29033934 | 34.9892407  | 2.725479188  | Up   | 1.46E-13  | 4.37E-13  | AAEL000076-PA OS=Aedes aegypti GN=AAEL000076 PE=4 SV=1                                    |
| CCG011060.1 | 1461  | 2641 | 1130 | 77.6749275 | 27.03822913 | -1.522448325 | Down | 6.40E-214 | 3.85E-213 | AAEL007452-PA OS=Aedes aegypti GN=AAEL007452 PE=4 SV=1                                    |

|             |      |      |      |            |             |             |      |          |          |                                                                             |
|-------------|------|------|------|------------|-------------|-------------|------|----------|----------|-----------------------------------------------------------------------------|
| CCG025840.1 | 2673 | 186  | 1131 | 2.99003765 | 14.79154921 | 2.306537607 | Up   | 6.43E-13 | 1.64E-12 | AAEL007409-PA (Fragment)<br>OS=Aedes aegypti<br>GN=AAEL007409 PE=4 SV=1     |
| CCG004988.1 | 1761 | 225  | 1131 | 5.49017052 | 22.45190859 | 2.031915227 | Up   | 0        | 0        | Apyrase OS=Culex<br>quinquefasciatus<br>GN=CpipJ_CPIJ011013 PE=3<br>SV=1    |
| CCG004938.1 | 1221 | 160  | 1132 | 5.63075965 | 32.41013047 | 2.525043352 | Up   | 4.24E-14 | 1.45E-13 | AAEL012942-PA OS=Aedes<br>aegypti GN=AAEL012942 PE=4<br>SV=1                |
| CCG004519.1 | 1461 | 193  | 1132 | 5.67635782 | 27.0860844  | 2.254514409 | Up   | 6.08E-14 | 2.02E-13 | AAEL001691-PA OS=Aedes<br>aegypti GN=AAEL001691 PE=4<br>SV=1                |
| CCG013315.1 | 801  | 377  | 1132 | 20.2242072 | 49.40420637 | 1.288550733 | Up   | 4.66E-13 | 1.21E-12 | AAEL007179-PA OS=Aedes<br>aegypti GN=AAEL007179 PE=4<br>SV=1                |
| CCG002957.1 | 7715 | 434  | 1132 | 2.41722162 | 5.129328491 | 1.085420214 | Up   | 0        | 0        | AAEL007931-PA OS=Aedes<br>aegypti GN=AAEL007931 PE=4<br>SV=1                |
| CCG000094.1 | 1089 | 18   | 1133 | 0.71024355 | 36.3707324  | 5.678320348 | Up   | 1.62E-09 | 3.33E-09 | Long form D7Bclu1 salivary<br>protein d711 OS=Aedes albopictus<br>PE=2 SV=1 |
| CCG013575.1 | 6984 | 4887 | 1133 | 30.0677396 | 5.671209562 | -2.40648804 | Down | 0        | 0        | AAEL002228-PA OS=Aedes<br>aegypti GN=AAEL002228 PE=4<br>SV=1                |
| CCG018583.1 | 1381 | 91   | 1134 | 2.8314597  | 28.70578266 | 3.341723489 | Up   | 0        | 0        | AAEL001324-PA OS=Aedes<br>aegypti GN=AAEL001324 PE=4<br>SV=1                |
| CCG001940.1 | 2184 | 366  | 1134 | 7.20097201 | 18.15141294 | 1.33381829  | Up   | 0        | 0        | AAEL002488-PA OS=Aedes<br>aegypti GN=AAEL002488 PE=4<br>SV=1                |
| CCG004254.1 | 1404 | 166  | 1136 | 5.0804672  | 28.28532935 | 2.477020892 | Up   | 1.83E-13 | 5.32E-13 | AAEL007554-PA OS=Aedes<br>aegypti GN=AAEL007554 PE=4<br>SV=1                |
| CCG004145.1 | 3900 | 218  | 1136 | 2.40189799 | 10.18271857 | 2.083875999 | Up   | 0        | 0        | AAEL007563-PA (Fragment)<br>OS=Aedes aegypti GN=DUOX<br>PE=4 SV=2           |
| CCG000776.1 | 1689 | 105  | 1137 | 2.67129789 | 23.53319165 | 3.139084225 | Up   | 0        | 0        | AAEL000550-PA OS=Aedes<br>aegypti GN=AAEL000550 PE=4<br>SV=1                |
| CCG019716.1 | 1776 | 176  | 1137 | 4.25826199 | 22.38038327 | 2.393898124 | Up   | 0        | 0        | AAEL003304-PA OS=Aedes<br>aegypti GN=AAEL003304 PE=4<br>SV=1                |
| CCG009981.1 | 1431 | 233  | 1137 | 6.99646972 | 27.77607316 | 1.989143598 | Up   | 0        | 0        | AAEL001187-PA OS=Aedes<br>aegypti GN=AAEL001187 PE=4<br>SV=1                |

|             |      |       |      |            |             |              |      |           |           |                                                                              |
|-------------|------|-------|------|------------|-------------|--------------|------|-----------|-----------|------------------------------------------------------------------------------|
| CCG023493.1 | 453  | 391   | 1137 | 37.0886672 | 87.74295958 | 1.242304945  | Up   | 9.02E-13  | 2.25E-12  | Putative salivary secreted peptide<br>OS=Aedes albopictus PE=2 SV=1          |
| CCG008099.1 | 2130 | 1968  | 1137 | 39.701614  | 18.66082662 | -1.089184763 | Down | 2.05E-95  | 1.08E-94  | AAEL011369-FA OS=Aedes<br>aegypti GN=AAEL011369 PE=4<br>SV=1                 |
| CCG011132.1 | 1965 | 83    | 1138 | 1.8150066  | 20.24555673 | 3.479558615  | Up   | 1.32E-13  | 4.01E-13  | AAEL015340-FA OS=Aedes<br>aegypti GN=AAEL015340 PE=4<br>SV=1                 |
| CCG004813.1 | 966  | 125   | 1138 | 5.56026587 | 41.18273185 | 2.888813761  | Up   | 2.35E-14  | 8.22E-14  | AAEL008833-FA OS=Aedes<br>aegypti GN=AAEL008833 PE=4<br>SV=1                 |
| CCG014171.1 | 333  | 4337  | 1138 | 559.638856 | 119.4670239 | -2.227883682 | Down | 0         | 0         | AAEL002825-FA OS=Aedes<br>aegypti GN=AAEL002825 PE=4<br>SV=1                 |
| CCG025551.2 | 2014 | 325   | 1139 | 6.93404357 | 19.7703462  | 1.511569328  | Up   | 1.19E-13  | 3.66E-13  | AAEL008005-FA OS=Aedes<br>aegypti GN=AAEL008005 PE=4<br>SV=1                 |
| CCG017278.1 | 2126 | 2093  | 1139 | 42.3027538 | 18.72882279 | -1.175491361 | Down | 1.96E-114 | 1.06E-113 | AAEL000080-FA OS=Aedes<br>aegypti GN=AAEL000080 PE=3<br>SV=1                 |
| CCG010261.1 | 1164 | 301   | 1140 | 11.1115894 | 34.23748756 | 1.623511636  | Up   | 0         | 0         | AAEL002890-FA OS=Aedes<br>aegypti GN=AAEL002890 PE=4<br>SV=1                 |
| CCG023335.1 | 3180 | 347   | 1140 | 4.68883582 | 12.53221243 | 1.41833946   | Up   | 0         | 0         | AAEL002925-FA OS=Aedes<br>aegypti GN=AAEL002925 PE=4<br>SV=1                 |
| CCG007434.1 | 936  | 356   | 1140 | 16.3431897 | 42.57738838 | 1.381397882  | Up   | 7.93E-13  | 1.99E-12  | Uncharacterized protein<br>OS=Anopheles darlingi<br>GN=AND_19522 PE=4 SV=1   |
| CCG013059.1 | 7158 | 10543 | 1140 | 63.2900129 | 5.567537793 | -3.506866509 | Down | 0         | 0         | AAEL008160-FA OS=Aedes<br>aegypti GN=AAEL008160 PE=4<br>SV=1                 |
| CCG010748.1 | 1692 | 0     | 1141 | 0.001      | 23.57410981 | 14.52491567  | Up   | 4.44E-16  | 1.64E-15  | Putative salivary secreted protein<br>62k-2 OS=Aedes albopictus PE=2<br>SV=1 |
| CCG006185.1 | 1561 | 116   | 1141 | 3.19313851 | 25.55246239 | 3.000415285  | Up   | 1.16E-13  | 3.59E-13  | AAEL014000-FA OS=Aedes<br>aegypti GN=AAEL014000 PE=4<br>SV=1                 |
| CCG023678.1 | 1577 | 121   | 1141 | 3.29698027 | 25.29321103 | 2.939533043  | Up   | 0         | 0         | AAEL006400-FA OS=Aedes<br>aegypti GN=AAEL006400 PE=4<br>SV=1                 |
| CCG015618.1 | 1871 | 127   | 1141 | 2.91670566 | 21.31875671 | 2.869711593  | Up   | 1.57E-13  | 4.67E-13  | AAEL007858-FA OS=Aedes<br>aegypti GN=AAEL007858 PE=4<br>SV=1                 |
| CCG002154.1 | 985  | 68    | 1142 | 2.96643853 | 40.53030667 | 3.772197298  | Up   | 0         | 0         | AAEL014289-FA OS=Aedes<br>aegypti GN=AAEL014289 PE=4<br>SV=1                 |

|             |      |       |      |            |             |              |      |          |            |                                                                                              |
|-------------|------|-------|------|------------|-------------|--------------|------|----------|------------|----------------------------------------------------------------------------------------------|
| CCG024053.2 | 2950 | 96    | 1142 | 1.39833713 | 13.5330007  | 3.274697638  | Up   | 0        | 0          | AAEL013624-PA OS=Aedes aegypti GN=AAEL013624 PE=4 SV=1                                       |
| CCG010370.1 | 2685 | 136   | 1142 | 2.17649308 | 14.86865999 | 2.772197298  | Up   | 1.70E-13 | 4.98E-13   | AAEL001746-PA OS=Aedes aegypti GN=AAEL001746 PE=4 SV=1                                       |
| CCG007173.1 | 1577 | 111   | 1143 | 3.02450256 | 25.3375462  | 3.066507026  | Up   | 0        | 0          | AAEL000547-PA OS=Aedes aegypti GN=AAEL008547 PE=4 SV=1                                       |
| CCG019140.1 | 4651 | 185   | 1143 | 1.70918102 | 8.591122415 | 2.329541432  | Up   | 0        | 0          | AAEL002312-PA OS=Aedes aegypti GN=AAEL002312 PE=4 SV=1                                       |
| CCG002349.1 | 549  | 445   | 1143 | 34.8297485 | 72.78198607 | 1.063261366  | Up   | 0        | 0          | Growth factor receptor-bound protein OS=Culex quinquefasciatus GN=CpipJ_CPIJ000896 PE=4 SV=1 |
| CCG012454.1 | 2982 | 257   | 1144 | 3.70329369 | 13.41122355 | 1.856559991  | Up   | 4.14E-13 | 1.10E-12   | Putative uncharacterized protein OS=Culex quinquefasciatus GN=CpipJ_CPIJ004892 PE=4 SV=1     |
| CCG020537.1 | 1938 | 329   | 1144 | 7.29465567 | 20.63584553 | 1.500240767  | Up   | 0        | 0          | AAEL012355-PA (Fragment) OS=Aedes aegypti GN=AAEL012355 PE=4 SV=1                            |
| CCG024779.1 | 1896 | 440   | 1144 | 9.97187934 | 21.09296869 | 1.080824827  | Up   | 0        | 0          | AAEL014130-PA OS=Aedes aegypti GN=AAEL014130 PE=4 SV=1                                       |
| CCG015344.1 | 1096 | 12307 | 1144 | 482.507777 | 36.48929619 | -3.725006967 | Down | 0        | 0          | AAEL000445-PA OS=Aedes aegypti GN=AAEL000445 PE=4 SV=1                                       |
| CCG022157.1 | 5478 | 203   | 1145 | 1.59234321 | 7.30690524  | 2.19810917   | Up   | 9.28E-14 | 2.93E-13   | AAEL013557-PA OS=Aedes aegypti GN=AAEL013557 PE=4 SV=1                                       |
| CCG028347.1 | 2416 | 370   | 1145 | 6.58062989 | 16.5675608  | 1.332063626  | Up   | 0        | 0          | -                                                                                            |
| CCG026500.1 | 1853 | 320   | 1147 | 7.42056939 | 21.63904126 | 1.544034785  | Up   | 0        | 0          | AAEL010065-PA OS=Aedes aegypti GN=AAEL010065 PE=2 SV=1                                       |
| CCG007913.2 | 2979 | 145   | 1148 | 2.09151108 | 13.47166893 | 2.68731104   | Up   | 0        | 0          | AAEL003540-PA OS=Aedes aegypti GN=AAEL003540 PE=4 SV=1                                       |
| CCG012873.1 | 834  | 1     | 1149 | 0.05152246 | 48.16194246 | 9.868476286  | Up   | 0.000587 | 0.00091655 | AAEL014128-PA OS=Aedes aegypti GN=AAEL014128 PE=4 SV=1                                       |
| CCG010700.1 | 2639 | 145   | 1149 | 2.36097443 | 15.22056082 | 2.688567196  | Up   | 0        | 0          | AGAP002097-PA OS=Anopheles gambiae GN=AgaP_AGAP002097 PE=4 SV=5                              |

|             |      |      |      |            |             |              |      |          |          |                                                                            |
|-------------|------|------|------|------------|-------------|--------------|------|----------|----------|----------------------------------------------------------------------------|
| CCG013501.1 | 1351 | 61   | 1150 | 1.94015826 | 29.75723041 | 3.938994012  | Up   | 1.75E-14 | 6.17E-14 | Uncharacterized protein<br>OS=Anopheles darlingi<br>GN=AND_00721 PE=4 SV=1 |
| CCG022558.1 | 1764 | 256  | 1150 | 6.23597056 | 22.7902598  | 1.86973135   | Up   | 0        | 0        | AAEL003987-PA OS=Aedes<br>aegypti GN=AAEL003987 PE=4<br>SV=1               |
| CCG026958.2 | 2490 | 459  | 1150 | 7.92092698 | 16.14538887 | 1.027381006  | Up   | 5.70E-13 | 1.47E-12 | AAEL005077-PA OS=Aedes<br>aegypti GN=AAEL005077 PE=4<br>SV=1               |
| CCG026665.1 | 1465 | 55   | 1151 | 1.61319823 | 27.46551301 | 4.089625608  | Up   | 0        | 0        | AAEL010412-PA OS=Aedes<br>aegypti GN=AAEL010412 PE=4<br>SV=1               |
| CCG008541.1 | 1569 | 343  | 1151 | 9.39363861 | 25.64498188 | 1.448920556  | Up   | 0        | 0        | AAEL007738-PA OS=Aedes<br>aegypti GN=AAEL007738 PE=4<br>SV=1               |
| CCG023167.1 | 1078 | 426  | 1151 | 16.9806187 | 37.32558123 | 1.136275702  | Up   | 4.37E-13 | 1.15E-12 | -                                                                          |
| CCG019296.1 | 1633 | 21   | 1153 | 0.55258079 | 24.68272696 | 5.481172579  | Up   | 1.76E-10 | 3.73E-10 | AAEL007496-PA OS=Aedes<br>aegypti GN=AAEL007496 PE=4<br>SV=1               |
| CCG021449.1 | 1068 | 89   | 1153 | 3.58081122 | 37.74053663 | 3.397756571  | Up   | 0        | 0        | AAEL003522-PA OS=Aedes<br>aegypti GN=AAEL003522 PE=4<br>SV=1               |
| CCG025691.1 | 1591 | 300  | 1153 | 8.10240125 | 25.33431371 | 1.644671311  | Up   | 1.10E-13 | 3.42E-13 | AAEL012330-PA OS=Aedes<br>aegypti GN=AAEL012330 PE=3<br>SV=1               |
| CCG002461.1 | 1281 | 326  | 1154 | 10.9353111 | 31.49246791 | 1.526012558  | Up   | 6.17E-13 | 1.58E-12 | AAEL013965-PA (Fragment)<br>OS=Aedes aegypti<br>GN=AAEL013965 PE=4 SV=1    |
| CCG025388.1 | 1659 | 19   | 1155 | 0.49211872 | 24.33804079 | 5.628062827  | Up   | 7.73E-10 | 1.60E-09 | AAEL010010-PA OS=Aedes<br>aegypti GN=AAEL010010 PE=4<br>SV=1               |
| CCG008312.1 | 3586 | 245  | 1155 | 2.93574595 | 11.25956767 | 1.939352401  | Up   | 3.40E-13 | 9.24E-13 | AAEL003573-PA OS=Aedes<br>aegypti GN=AAEL003573 PE=4<br>SV=1               |
| CCG009134.1 | 2001 | 261  | 1155 | 5.60474799 | 20.17831568 | 1.848084344  | Up   | 8.02E-14 | 2.58E-13 | AAEL005636-PA OS=Aedes<br>aegypti GN=AAEL005636 PE=4<br>SV=1               |
| CCG013942.1 | 1869 | 442  | 1155 | 10.1619169 | 21.60342947 | 1.088087781  | Up   | 0        | 0        | AAEL006525-PA OS=Aedes<br>aegypti GN=AAEL006525 PE=4<br>SV=1               |
| CCG021250.1 | 1914 | 306  | 1156 | 6.86976948 | 21.11377636 | 1.619851044  | Up   | 0        | 0        | AAEL008319-PA OS=Aedes<br>aegypti GN=AAEL008319 PE=4<br>SV=1               |
| CCG012565.1 | 2076 | 408  | 1156 | 8.44491894 | 19.46616953 | 1.204813544  | Up   | 1.01E-12 | 2.49E-12 | AAEL002651-PA OS=Aedes<br>aegypti GN=AAEL002651 PE=4<br>SV=1               |
| CCG006176.2 | 930  | 3776 | 1156 | 174.466363 | 43.45351392 | -2.005404163 | Down | 0        | 0        | AAEL000757-PA OS=Aedes<br>aegypti GN=AAEL000757 PE=4<br>SV=1               |

|             |      |     |      |            |             |             |    |          |          |                                                                                          |
|-------------|------|-----|------|------------|-------------|-------------|----|----------|----------|------------------------------------------------------------------------------------------|
| CCG026717.1 | 1750 | 308 | 1157 | 7.56267329 | 23.11241499 | 1.611699812 | Up | 0        | 0        | AAEL004315-PA OS=Aedes aegypti GN=AAEL004315 PE=4 SV=1                                   |
| CCG024703.1 | 2027 | 316 | 1157 | 6.69878448 | 19.95398432 | 1.574705605 | Up | 3.23E-13 | 8.83E-13 | AAEL005552-PA OS=Aedes aegypti GN=AAEL005552 PE=3 SV=1                                   |
| CCG001285.1 | 1491 | 165 | 1158 | 4.75520202 | 27.15069383 | 2.513410528 | Up | 1.31E-14 | 4.67E-14 | AAEL005798-PA OS=Aedes aegypti GN=VATB PE=2 SV=1                                         |
| CCG006823.1 | 1848 | 283 | 1159 | 6.58032191 | 21.92459025 | 1.736319812 | Up | 0        | 0        | AAEL005461-PA (Fragment) OS=Aedes aegypti GN=AAEL005461 PE=4 SV=1                        |
| CCG009311.1 | 2433 | 53  | 1160 | 0.93604436 | 16.66732472 | 4.154301839 | Up | 0        | 0        | AAEL014341-PA OS=Aedes aegypti GN=AAEL014341 PE=4 SV=1                                   |
| CCG012268.1 | 1434 | 146 | 1161 | 4.37488232 | 28.30303998 | 2.693640902 | Up | 9.33E-15 | 3.34E-14 | Putative uncharacterized protein OS=Culex quinquefasciatus GN=CpipJ_CPIJ011278 PE=4 SV=1 |
| CCG000196.1 | 3624 | 231 | 1161 | 2.73896487 | 11.19938171 | 2.031716419 | Up | 1.29E-13 | 3.97E-13 | AAEL006139-PA OS=Aedes aegypti GN=AAEL006139 PE=3 SV=1                                   |
| CCG020157.1 | 2853 | 84  | 1162 | 1.26514466 | 14.23817652 | 3.492390134 | Up | 0        | 0        | AGAP005525-PA OS=Anopheles gambiae GN=AGAP005525 PE=4 SV=1                               |
| CCG007039.1 | 414  | 138 | 1162 | 14.3232449 | 98.11960775 | 2.7761831   | Up | 1.49E-13 | 4.45E-13 | -                                                                                        |
| CCG000390.1 | 1479 | 182 | 1162 | 5.28768878 | 27.46552915 | 2.376912917 | Up | 0        | 0        | AAEL010378-PA OS=Aedes aegypti GN=AAEL010378 PE=4 SV=1                                   |
| CCG012391.1 | 1641 | 433 | 1162 | 11.3381445 | 24.75412408 | 1.126484342 | Up | 9.43E-13 | 2.34E-12 | Putative uncharacterized protein OS=Culex quinquefasciatus GN=CpipJ_CPIJ000417 PE=4 SV=1 |
| CCG006081.1 | 1572 | 0   | 1163 | 0.001      | 25.86289815 | 14.65859633 | Up | 4.44E-16 | 1.65E-15 | AAEL005916-PA OS=Aedes aegypti GN=AAEL005916 PE=4 SV=1                                   |
| CCG013715.1 | 636  | 177 | 1163 | 11.9585582 | 63.92527655 | 2.418343035 | Up | 0        | 0        | AAEL001795-PA OS=Aedes aegypti GN=AAEL001795 PE=3 SV=1                                   |
| CCG023621.1 | 528  | 145 | 1164 | 11.8004006 | 77.06711016 | 2.707279457 | Up | 0        | 0        | Putative uncharacterized protein OS=Culex quinquefasciatus GN=CpipJ_CPIJ005778 PE=4 SV=1 |
| CCG015072.1 | 2049 | 186 | 1164 | 3.90062013 | 19.85916748 | 2.348029736 | Up | 6.43E-13 | 1.64E-12 | AAEL004708-PA (Fragment) OS=Aedes aegypti GN=AAEL004708 PE=4 SV=1                        |

|             |       |      |      |            |             |              |      |           |           |                                                                         |
|-------------|-------|------|------|------------|-------------|--------------|------|-----------|-----------|-------------------------------------------------------------------------|
| CCG011901.1 | 3903  | 233  | 1164 | 2.56519297 | 10.42568131 | 2.023002402  | Up   | 0         | 0         | AAEL001387-PA OS=Aedes aegypti GN=AAEL001387 PE=4 SV=1                  |
| CCG021336.1 | 1026  | 340  | 1164 | 14.2394832 | 39.66026722 | 1.477797611  | Up   | 8.86E-14  | 2.80E-13  | AAEL013394-PA OS=Aedes aegypti GN=AAEL013394 PE=3 SV=1                  |
| CCG021416.1 | 12680 | 384  | 1164 | 1.30129165 | 3.209103641 | 1.302226046  | Up   | 1.03E-12  | 2.55E-12  | AAEL010974-PA OS=Aedes aegypti GN=AAEL010974 PE=4 SV=1                  |
| CCG000279.1 | 918   | 446  | 1164 | 20.8763634 | 44.32618101 | 1.086288647  | Up   | 0         | 0         | AAEL011803-PA OS=Aedes aegypti GN=AAEL011803 PE=4 SV=1                  |
| CCG016002.1 | 3948  | 165  | 1165 | 1.79584757 | 10.31570224 | 2.522105229  | Up   | 1.31E-14  | 4.67E-14  | AAEL002339-PA OS=Aedes aegypti GN=AAEL002339 PE=4 SV=1                  |
| CCG020900.1 | 5208  | 334  | 1165 | 2.75573951 | 7.819967826 | 1.504723151  | Up   | 3.15E-13  | 8.65E-13  | AAEL013534-PA (Fragment) OS=Aedes aegypti GN=AAEL013534 PE=4 SV=1       |
| CCG003554.1 | 2385  | 349  | 1166 | 6.28781441 | 17.09071309 | 1.442582051  | Up   | 4.55E-14  | 1.54E-13  | AAEL012247-PA OS=Aedes aegypti GN=AAEL012247 PE=4 SV=1                  |
| CCG021410.1 | 2871  | 436  | 1166 | 6.52553267 | 14.19761432 | 1.121480952  | Up   | 1.61E-13  | 4.76E-13  | AAEL013386-PA OS=Aedes aegypti GN=AAEL013386 PE=4 SV=1                  |
| CCG012636.1 | 1140  | 448  | 1167 | 16.8863518 | 35.78623596 | 1.083547127  | Up   | 0         | 0         | Membrann OS=Culex quinquefasciatus GN=CpipJ_CPIJ004746 PE=4 SV=1        |
| CCG007679.1 | 4731  | 2237 | 1167 | 20.3177545 | 8.623189388 | -1.236447492 | Down | 2.81E-132 | 1.56E-131 | AAEL004098-PA OS=Aedes aegypti GN=AAEL004098 PE=4 SV=1                  |
| CCG027138.1 | 17690 | 2149 | 1169 | 5.22000903 | 2.310131461 | -1.176077349 | Down | 1.55E-117 | 8.43E-117 | AAEL005179-PA OS=Aedes aegypti GN=AAEL005179 PE=4 SV=1                  |
| CCG018589.1 | 1230  | 8691 | 1169 | 303.617857 | 33.22457362 | -3.191934052 | Down | 0         | 0         | Alginate kinase OS=Culex quinquefasciatus GN=CpipJ_CPIJ007538 PE=3 SV=1 |
| CCG023441.1 | 1614  | 375  | 1170 | 9.9836744  | 25.34150175 | 1.343859233  | Up   | 0         | 0         | AAEL002658-PA OS=Aedes aegypti GN=AAEL002658 PE=4 SV=1                  |
| CCG012799.1 | 1798  | 3307 | 1170 | 79.0327655 | 22.74815563 | -1.796701312 | Down | 0         | 0         | AAEL005430-PA OS=Aedes aegypti GN=AAEL005430 PE=4 SV=1                  |
| CCG003410.1 | 1812  | 3655 | 1170 | 86.6746027 | 22.57239725 | -1.941049673 | Down | 0         | 0         | AAEL004439-PA OS=Aedes aegypti GN=AAEL004439 PE=4 SV=1                  |
| CCG017547.1 | 2720  | 138  | 1171 | 2.18008212 | 15.05005224 | 2.787314108  | Up   | 1.49E-13  | 4.45E-13  | AAEL009479-PA OS=Aedes aegypti GN=AAEL009479 PE=4 SV=1                  |

|             |       |       |      |            |             |              |      |           |           |                                                                                 |
|-------------|-------|-------|------|------------|-------------|--------------|------|-----------|-----------|---------------------------------------------------------------------------------|
| CCG019105.1 | 33052 | 12110 | 1171 | 15.7437821 | 1.23853752  | -3.66807268  | Down | 0         | 0         | AAEL004204-PA OS=Aedes aegypti GN=AAEL004264 PE=4 SV=1                          |
| CCG028574.1 | 981   | 118   | 1172 | 5.16863271 | 41.76462832 | 3.014427009  | Up   | 0         | 0         | AAEL011385-PA OS=Aedes aegypti GN=AAEL011385 PE=4 SV=1                          |
| CCG002010.1 | 3516  | 174   | 1172 | 2.12648857 | 11.65275892 | 2.454126562  | Up   | 1.78E-13  | 5.20E-13  | AAEL014631-PA OS=Aedes aegypti GN=AAEL014631 PE=4 SV=1                          |
| CCG000879.1 | 954   | 237   | 1172 | 10.6748712 | 42.9466461  | 2.008326809  | Up   | 2.32E-13  | 6.62E-13  | AAEL009765-PA OS=Aedes aegypti GN=AAEL009765 PE=4 SV=1                          |
| CCG025184.2 | 2976  | 262   | 1172 | 3.78295379 | 13.76717083 | 1.863647057  | Up   | 0         | 0         | Viterbigenin convervase OS=Culex quinquefasciatus GN=CpipJ_CPIJ011701 PE=4 SV=1 |
| CCG007517.1 | 414   | 2607  | 1172 | 270.584778 | 98.96401057 | -1.451104809 | Down | 1.24E-196 | 7.40E-196 | AAEL002587-PA OS=Aedes aegypti GN=AAEL002587 PE=4 SV=1                          |
| CCG020269.1 | 867   | 23    | 1173 | 1.13991222 | 47.2964921  | 5.374738546  | Up   | 4.01E-11  | 8.68E-11  | AAEL005325-PA OS=Aedes aegypti GN=AAEL005325 PE=4 SV=1                          |
| CCG027539.1 | 19727 | 413   | 1173 | 0.89960462 | 2.078676872 | 1.20830253   | Up   | 5.88E-13  | 1.51E-12  | AAEL011567-PA OS=Aedes aegypti GN=AAEL011567 PE=3 SV=1                          |
| CCG024028.1 | 22197 | 3628  | 1173 | 7.02321022 | 1.847369404 | -1.926658239 | Down | 0         | 0         | AAEL010061-PA OS=Aedes aegypti GN=AAEL010061 PE=4 SV=1                          |
| CCG014428.1 | 660   | 144   | 1174 | 9.37521482 | 62.18335899 | 2.729604895  | Up   | 7.53E-14  | 2.44E-13  | GATA transcription factor GATAb-2 OS=Aedes aegypti PE=2 SV=1                    |
| CCG006562.1 | 2714  | 173   | 1174 | 2.73904351 | 15.12196644 | 2.464901669  | Up   | 3.60E-13  | 9.68E-13  | AAEL000157-PA OS=Aedes aegypti GN=AAEL000157 PE=4 SV=1                          |
| CCG022989.1 | 11652 | 387   | 1174 | 1.42716163 | 3.522229397 | 1.303340141  | Up   | 1.31E-12  | 3.18E-12  | AGAP005300-PA OS=Anopheles gambiae GN=AGAP005300 PE=2 SV=1                      |
| CCG016706.1 | 628   | 33    | 1175 | 2.25796376 | 65.40760383 | 4.856364126  | Up   | 1.31E-13  | 4.01E-13  | -                                                                               |
| CCG012299.1 | 1545  | 120   | 1175 | 3.33745512 | 26.58639172 | 2.99386765   | Up   | 0         | 0         | AAEL009352-PA OS=Aedes aegypti GN=AAEL009352 PE=4 SV=1                          |
| CCG001783.1 | 1976  | 461   | 1175 | 10.0248217 | 20.78743685 | 1.052135305  | Up   | 1.29E-13  | 3.95E-13  | AAEL009394-PA OS=Aedes aegypti GN=AAEL009394 PE=4 SV=1                          |
| CCG003478.1 | 2249  | 350   | 1176 | 6.68715301 | 18.27965028 | 1.450774437  | Up   | 3.00E-14  | 1.04E-13  | AAEL013631-PA OS=Aedes aegypti GN=AAEL013631 PE=4 SV=1                          |
| CCG025795.1 | 915   | 113   | 1177 | 5.30664482 | 44.96818772 | 3.083032846  | Up   | 1.42E-13  | 4.27E-13  | AAEL011321-PA OS=Aedes aegypti GN=AAEL011321 PE=4 SV=1                          |



|             |       |      |      |            |             |              |      |           |           |                                                                                          |
|-------------|-------|------|------|------------|-------------|--------------|------|-----------|-----------|------------------------------------------------------------------------------------------|
| CCG009379.1 | 11206 | 4137 | 1177 | 15.8634474 | 3.671773314 | -2.111157433 | Down | 0         | 0         | Ank2, isoform 1 OS=Drosophila melanogaster GN=Ank2 PE=2 SV=1                             |
| CCG006341.1 | 1152  | 151  | 1178 | 5.63231764 | 35.74726566 | 2.666032288  | Up   | 0         | 0         | AAEL007701-PA OS=Aedes aegypti GN=AAEL007701 PE=4 SV=1                                   |
| CCG000187.1 | 887   | 209  | 1179 | 10.124774  | 46.46652572 | 2.198302075  | Up   | 0         | 0         | -                                                                                        |
| CCG020986.1 | 26840 | 2276 | 1179 | 3.64378226 | 1.535611338 | -1.246623636 | Down | 2.78E-136 | 1.55E-135 | Putative uncharacterized protein OS=Culex quinquefasciatus GN=CpipJ_CPIJ017286 PE=4 SV=1 |
| CCG022214.1 | 3216  | 3569 | 1179 | 47.6862509 | 12.81586079 | -1.895642979 | Down | 0         | 0         | 6-phosphofructokinase OS=Aedes aegypti GN=AAEL006895 PE=3 SV=1                           |
| CCG003491.1 | 1623  | 182  | 1180 | 4.81854079 | 25.41636882 | 2.399089708  | Up   | 0         | 0         | AAEL000437-PA OS=Aedes aegypti GN=AAEL006437 PE=4 SV=1                                   |
| CCG010941.1 | 424   | 3034 | 1180 | 307.476827 | 97.28954385 | -1.660121022 | Down | 1.86E-278 | 1.16E-277 | AAEL003011-PA OS=Aedes aegypti GN=AAEL003011 PE=4 SV=1                                   |
| CCG004191.1 | 1197  | 215  | 1181 | 7.71803922 | 34.49099822 | 2.159913604  | Up   | 0         | 0         | Ribonucleotide reductase R2 subunit OS=Aedes albopictus PE=2 SV=1                        |
| CCG009737.1 | 12600 | 396  | 1181 | 1.35047737 | 3.276644831 | 1.278749833  | Up   | 4.78E-13  | 1.24E-12  | AAEL010184-PA OS=Aedes aegypti GN=AAEL010184 PE=4 SV=1                                   |
| CCG015570.1 | 3062  | 74   | 1182 | 1.03845864 | 13.49467118 | 3.699874158  | Up   | 0         | 0         | AAEL000465-PA OS=Aedes aegypti GN=AAEL008465 PE=4 SV=1                                   |
| CCG004555.1 | 1776  | 312  | 1182 | 7.54873716 | 23.26615042 | 1.623925305  | Up   | 9.28E-14  | 2.93E-13  | AAEL000431-PA OS=Aedes aegypti GN=AAEL008431 PE=4 SV=1                                   |
| CCG012046.1 | 2487  | 370  | 1182 | 6.39276309 | 16.61466954 | 1.377946063  | Up   | 0         | 0         | AAEL003083-PA OS=Aedes aegypti GN=AAEL003083 PE=4 SV=1                                   |
| CCG005738.1 | 1077  | 373  | 1182 | 14.8818115 | 38.36646532 | 1.366295704  | Up   | 3.38E-13  | 9.19E-13  | AAEL000807-PA OS=Aedes aegypti GN=AAEL000807 PE=4 SV=1                                   |
| CCG013727.1 | 1638  | 400  | 1182 | 10.4932197 | 25.22630229 | 1.265471334  | Up   | 3.36E-13  | 9.14E-13  | AAEL002867-PA OS=Aedes aegypti GN=AAEL002867 PE=3 SV=1                                   |
| CCG025933.1 | 2163  | 2294 | 1182 | 45.572155  | 19.10341338 | -1.254322152 | Down | 1.14E-138 | 6.40E-138 | AAEL001616-PA OS=Aedes aegypti GN=AAEL001616 PE=3 SV=1                                   |
| CCG026753.1 | 2178  | 136  | 1183 | 2.68314229 | 18.98789781 | 2.823084721  | Up   | 1.70E-13  | 4.99E-13  | AAEL013400-PA OS=Aedes aegypti GN=AAEL013400 PE=3 SV=1                                   |

|             |       |      |      |            |             |              |      |           |           |                                                                                                   |
|-------------|-------|------|------|------------|-------------|--------------|------|-----------|-----------|---------------------------------------------------------------------------------------------------|
| CCG008106.1 | 1215  | 65   | 1184 | 2.29879239 | 34.0663372  | 3.889398756  | Up   | 0         | 0         | AAEL007075-PA (Fragment)<br>OS=Aedes aegypti<br>GN=AAEL007075 PE=4 SV=1                           |
| CCG022805.1 | 1671  | 399  | 1184 | 10.2602777 | 24.76995793 | 1.271521633  | Up   | 0         | 0         | AAEL006308-PA OS=Aedes<br>aegypti GN=AAEL006308 PE=4<br>SV=1                                      |
| CCG025707.1 | 771   | 156  | 1185 | 8.69426537 | 53.72964718 | 2.627582329  | Up   | 1.42E-13  | 4.26E-13  | AAEL013939-PA OS=Aedes<br>aegypti GN=AAEL013939 PE=4<br>SV=1                                      |
| CCG023565.1 | 2295  | 313  | 1185 | 5.86036032 | 18.05035206 | 1.622965701  | Up   | 0         | 0         | AAEL002767-PA OS=Aedes<br>aegypti GN=AAEL002767 PE=3<br>SV=1                                      |
| CCG001878.1 | 1077  | 420  | 1185 | 16.7569996 | 38.46384213 | 1.19873903   | Up   | 1.84E-13  | 5.32E-13  | AAEL002723-PA OS=Aedes<br>aegypti GN=AAEL002723 PE=3<br>SV=1                                      |
| CCG004351.1 | 752   | 2823 | 1185 | 161.307927 | 55.08717816 | -1.550028866 | Down | 1.20E-234 | 7.32E-234 | Mitochondrial ATP synthase F<br>chain OS=Culex tarsalis PE=4<br>SV=1                              |
| CCG020696.1 | 1381  | 87   | 1186 | 2.70699994 | 30.02209721 | 3.471258003  | Up   | 0         | 0         | AAEL009727-PA OS=Aedes<br>aegypti GN=AAEL009727 PE=4<br>SV=1                                      |
| CCG012048.1 | 1946  | 111  | 1187 | 2.4509972  | 21.32347098 | 3.121001557  | Up   | 0         | 0         | AAEL003056-PA OS=Aedes<br>aegypti GN=AAEL003056 PE=3<br>SV=1                                      |
| CCG011673.1 | 4986  | 175  | 1187 | 1.50816357 | 8.322397619 | 2.464206312  | Up   | 3.55E-13  | 9.57E-13  | AAEL004377-PA OS=Aedes<br>aegypti GN=AAEL004377 PE=4<br>SV=1                                      |
| CCG025698.1 | 1485  | 271  | 1187 | 7.84161487 | 27.94308049 | 1.833268382  | Up   | 0         | 0         | AAEL006309-PA OS=Aedes<br>aegypti GN=AAEL006309 PE=4<br>SV=1                                      |
| CCG004311.2 | 10620 | 8886 | 1188 | 35.9537723 | 3.910586893 | -3.200686101 | Down | 0         | 0         | Putative uncharacterized protein<br>OS=Culex quinquefasciatus<br>GN=CpipJ_CPIJ007110 PE=4<br>SV=1 |
| CCG007435.1 | 1569  | 109  | 1189 | 2.98515046 | 26.49164505 | 3.149661879  | Up   | 0         | 0         | AAEL012751-PA OS=Aedes<br>aegypti GN=AAEL012751 PE=4<br>SV=1                                      |
| CCG007410.1 | 1196  | 3677 | 1189 | 132.106784 | 34.75367147 | -1.926467258 | Down | 0         | 0         | AAEL004042-PA OS=Aedes<br>aegypti GN=AAEL004042 PE=2<br>SV=1                                      |
| CCG022337.1 | 1611  | 178  | 1190 | 4.74774225 | 25.82268737 | 2.443325631  | Up   | 1.15E-13  | 3.57E-13  | AAEL015128-PA OS=Aedes<br>aegypti GN=AAEL015128 PE=4<br>SV=1                                      |
| CCG020028.1 | 2731  | 339  | 1190 | 5.33384842 | 15.23264349 | 1.513917599  | Up   | 1.30E-13  | 3.98E-13  | AAEL004630-PA OS=Aedes<br>aegypti GN=AAEL004630 PE=4<br>SV=1                                      |
| CCG018274.1 | 1530  | 103  | 1191 | 2.89273377 | 27.21261937 | 3.233770374  | Up   | 0         | 0         | AAEL012460-PA OS=Aedes<br>aegypti GN=AAEL012460 PE=4<br>SV=1                                      |

|             |       |      |      |            |             |              |      |           |           |                                                                                          |
|-------------|-------|------|------|------------|-------------|--------------|------|-----------|-----------|------------------------------------------------------------------------------------------|
| CCG001770.1 | 2112  | 219  | 1191 | 4.4556685  | 19.71368733 | 2.145483842  | Up   | 4.32E-13  | 1.14E-12  | AAEL010803-PA (Fragment)<br>OS=Aedes aegypti<br>GN=AAEL010803 PE=3 SV=1                  |
| CCG005898.1 | 2132  | 230  | 1191 | 4.63557175 | 19.52875593 | 2.074780851  | Up   | 3.85E-13  | 1.03E-12  | AAEL002450-PA OS=Aedes<br>aegypti GN=AAEL002450 PE=4<br>SV=1                             |
| CCG012475.1 | 2028  | 296  | 1191 | 6.27171669 | 20.53023059 | 1.710817536  | Up   | 2.26E-13  | 6.47E-13  | AAEL005235-PA OS=Aedes<br>aegypti GN=AAEL005235 PE=4<br>SV=1                             |
| CCG021101.1 | 1613  | 306  | 1191 | 8.15172895 | 25.81234199 | 1.662883059  | Up   | 0         | 0         | RING finger protein 121 OS=Culex<br>quinquefasciatus<br>GN=CpipJ_CPIJ006831 PE=4<br>SV=1 |
| CCG003078.1 | 3198  | 433  | 1191 | 5.81797845 | 13.01917062 | 1.162047687  | Up   | 9.43E-13  | 2.34E-12  | AAEL009040-PA OS=Aedes<br>aegypti GN=AAEL009040 PE=4<br>SV=1                             |
| CCG009392.1 | 2086  | 66   | 1192 | 1.35954098 | 19.97615816 | 3.877087605  | Up   | 0         | 0         | AAEL008572-PA OS=Aedes<br>aegypti GN=AAEL008572 PE=4<br>SV=1                             |
| CCG005392.1 | 1790  | 223  | 1192 | 5.35321275 | 23.27947816 | 2.120581824  | Up   | 0         | 0         | AAEL006400-PA OS=Aedes<br>aegypti GN=AAEL006400 PE=4<br>SV=1                             |
| CCG006691.1 | 1371  | 439  | 1193 | 13.7590908 | 30.41956542 | 1.144614402  | Up   | 0         | 0         | AAEL005492-PA OS=Aedes<br>aegypti GN=AAEL005492 PE=4<br>SV=1                             |
| CCG025730.1 | 20349 | 317  | 1194 | 0.66938945 | 2.051215414 | 1.615561295  | Up   | 2.22E-13  | 6.35E-13  | AAEL009454-PA OS=Aedes<br>aegypti GN=AAEL009454 PE=4<br>SV=1                             |
| CCG000195.1 | 1572  | 35   | 1195 | 0.95670529 | 26.57451701 | 4.79582509   | Up   | 6.39E-14  | 2.11E-13  | AAEL006132-PA OS=Aedes<br>aegypti GN=AAEL006132 PE=4<br>SV=1                             |
| CCG022967.1 | 1587  | 215  | 1195 | 5.82135661 | 26.3233401  | 2.176915257  | Up   | 0         | 0         | AAEL000527-PA (Fragment)<br>OS=Aedes aegypti<br>GN=AAEL000527 PE=4 SV=1                  |
| CCG014156.1 | 3647  | 2856 | 1195 | 33.6500033 | 11.45465883 | -1.554672157 | Down | 2.07E-238 | 1.26E-237 | AAEL001542-PA (Fragment)<br>OS=Aedes aegypti<br>GN=AAEL001542 PE=4 SV=1                  |
| CCG028522.1 | 1506  | 88   | 1196 | 2.51084771 | 27.76234995 | 3.466883259  | Up   | 2.93E-14  | 1.02E-13  | AAEL014080-PA OS=Aedes<br>aegypti GN=AAEL014080 PE=3<br>SV=1                             |
| CCG020322.1 | 1845  | 97   | 1196 | 2.25911342 | 22.66130028 | 3.326402036  | Up   | 3.62E-14  | 1.25E-13  | AAEL011261-PA OS=Aedes<br>aegypti GN=AAEL011261 PE=4<br>SV=1                             |
| CCG010786.1 | 3648  | 99   | 1196 | 1.16611944 | 11.4611017  | 3.296958258  | Up   | 0         | 0         | AAEL007150-PA OS=Aedes<br>aegypti GN=AAEL007150 PE=4<br>SV=1                             |

|             |       |      |      |            |             |              |      |           |           |                                                                                                        |
|-------------|-------|------|------|------------|-------------|--------------|------|-----------|-----------|--------------------------------------------------------------------------------------------------------|
| CCG003980.1 | 945   | 119  | 1197 | 5.41100362 | 44.28048391 | 3.032702877  | Up   | 0         | 0         | Ribosomal protein S6 kinase, 90kD, polypeptide OS=Culex quinquefasciatus GN=CpipJ_CPIJ012176 PE=4 SV=1 |
| CCG026970.1 | 1017  | 167  | 1197 | 7.05599379 | 41.1455824  | 2.543816348  | Up   | 1.62E-13  | 4.77E-13  | AAEL000737-PA OS=Aedes aegypti GN=AAEL008737 PE=4 SV=1                                                 |
| CCG006379.1 | 2075  | 225  | 1197 | 4.65936881 | 20.16629267 | 2.11373945   | Up   | 0         | 0         | AAEL002496-PA OS=Aedes aegypti GN=AAEL002496 PE=4 SV=1                                                 |
| CCG023834.2 | 1872  | 383  | 1197 | 8.79135062 | 22.3531289  | 1.346320059  | Up   | 0         | 0         | Translucan-associated protein subunit alpha OS=Culex quinquefasciatus GN=CpipJ_CPIJ018234 PE=4 SV=1    |
| CCG024394.1 | 21735 | 2579 | 1197 | 5.09864024 | 1.925238431 | -1.405075417 | Down | 2.55E-185 | 1.50E-184 | AAEL012849-PA OS=Aedes aegypti GN=AAEL012849 PE=4 SV=1                                                 |
| CCG009734.1 | 1827  | 147  | 1199 | 3.45733497 | 22.94196708 | 2.730256802  | Up   | 7.02E-14  | 2.29E-13  | AAEL010182-PA OS=Aedes aegypti GN=AAEL010182 PE=4 SV=1                                                 |
| CCG007177.1 | 1517  | 224  | 1199 | 6.34490478 | 27.63017393 | 2.122574225  | Up   | 2.04E-13  | 5.88E-13  | mRNA capping enzyme OS=Culex quinquefasciatus GN=CpipJ_CPIJ018510 PE=4 SV=1                            |
| CCG005197.1 | 2139  | 276  | 1199 | 5.54448189 | 19.5955932  | 1.82140469   | Up   | 0         | 0         | AAEL011502-PA OS=Aedes aegypti GN=AAEL011502 PE=4 SV=1                                                 |
| CCG024240.1 | 3486  | 2395 | 1199 | 29.5216622 | 12.02380202 | -1.295880793 | Down | 3.39E-152 | 1.93E-151 | AGAP011396-PA (Fragment) OS=Anopheles gambiae GN=AGAP011396 PE=4 SV=4                                  |
| CCG017753.1 | 1437  | 299  | 1200 | 8.94081465 | 29.19271547 | 1.70713022   | Up   | 4.80E-13  | 1.25E-12  | G-protein signaling modulator OS=Culex quinquefasciatus GN=CpipJ_CPIJ010095 PE=4 SV=1                  |
| CCG010775.1 | 480   | 4338 | 1200 | 388.338977 | 87.39569193 | -2.151682443 | Down | 0         | 0         | Conserved possible Golgi protein OS=Aedes aegypti PE=2 SV=1                                            |
| CCG018527.1 | 3690  | 6901 | 1200 | 80.3615552 | 11.36854529 | -2.821457823 | Down | 0         | 0         | AAEL003104-PA OS=Aedes aegypti GN=AAEL003104 PE=4 SV=1                                                 |
| CCG006283.1 | 12053 | 471  | 1201 | 1.67914586 | 3.483356044 | 1.05275039   | Up   | 0         | 0         | AAEL000399-PA OS=Aedes aegypti GN=AAEL000399 PE=4 SV=1                                                 |
| CCG018360.1 | 1689  | 178  | 1204 | 4.52848594 | 24.91993205 | 2.46019945   | Up   | 1.15E-13  | 3.58E-13  | AAEL000716-PA OS=Aedes aegypti GN=AAEL008716 PE=4 SV=1                                                 |

|             |      |      |      |            |             |              |      |           |           |                                                                                                   |
|-------------|------|------|------|------------|-------------|--------------|------|-----------|-----------|---------------------------------------------------------------------------------------------------|
| CCG026857.1 | 3664 | 243  | 1204 | 2.84979408 | 11.48738134 | 2.011120377  | Up   | 1.53E-14  | 5.41E-14  | Putative uncharacterized protein<br>OS=Culex quinquefasciatus<br>GN=CpipJ_CPIJ014388 PE=4<br>SV=1 |
| CCG018727.1 | 2111 | 212  | 1205 | 4.3152931  | 19.95486666 | 2.20921018   | Up   | 0         | 0         | AAEL015048-PA OS=Aedes<br>aegypti GN=AAEL015048 PE=4<br>SV=1                                      |
| CCG027222.1 | 1299 | 247  | 1205 | 8.1705346  | 32.42857853 | 1.988763403  | Up   | 0         | 0         | AAEL011050-PA OS=Aedes<br>aegypti GN=AAEL011050 PE=4<br>SV=1                                      |
| CCG004758.1 | 1086 | 6    | 1206 | 0.23740185 | 38.82106979 | 7.353364895  | Up   | 8.38E-06  | 1.47E-05  | Leucine rich protein OS=Aedes<br>albopictus PE=2 SV=1                                             |
| CCG000906.1 | 1860 | 186  | 1207 | 4.29697346 | 22.68529036 | 2.400364353  | Up   | 6.43E-13  | 1.64E-12  | AAEL004832-PA OS=Aedes<br>aegypti GN=AAEL004832 PE=4<br>SV=1                                      |
| CCG000641.1 | 3256 | 312  | 1207 | 4.117493   | 12.95904179 | 1.654120946  | Up   | 9.28E-14  | 2.94E-13  | Putative uncharacterized protein<br>OS=Culex quinquefasciatus<br>GN=CpipJ_CPIJ014927 PE=4<br>SV=1 |
| CCG021827.1 | 2745 | 39   | 1208 | 0.61049896 | 15.38418883 | 4.655315724  | Up   | 7.33E-14  | 2.38E-13  | AAEL009787-PA OS=Aedes<br>aegypti GN=AAEL009787 PE=4<br>SV=1                                      |
| CCG003657.2 | 1785 | 454  | 1208 | 10.9289969 | 23.65803829 | 1.114169456  | Up   | 3.16E-13  | 8.66E-13  | AAEL011055-PA OS=Aedes<br>aegypti GN=AAEL011055 PE=3<br>SV=1                                      |
| CCG017249.1 | 2178 | 2611 | 1208 | 51.5123862 | 19.38916361 | -1.409668799 | Down | 1.60E-188 | 9.45E-188 | AAEL010523-PA OS=Aedes<br>aegypti GN=AAEL010523 PE=4<br>SV=1                                      |
| CCG023641.1 | 2355 | 119  | 1209 | 2.17129445 | 17.94673317 | 3.04709397   | Up   | 0         | 0         | AAEL008834-PA OS=Aedes<br>aegypti GN=AAEL008834 PE=4<br>SV=1                                      |
| CCG013351.1 | 2886 | 318  | 1209 | 4.73471088 | 14.64468351 | 1.629028778  | Up   | 1.20E-13  | 3.69E-13  | AAEL008244-PA (Fragment)<br>OS=Aedes aegypti<br>GN=AAEL008244 PE=4 SV=1                           |
| CCG002331.1 | 1420 | 75   | 1210 | 2.26952824 | 29.78839077 | 3.714285845  | Up   | 0         | 0         | AAEL000142-PA (Fragment)<br>OS=Aedes aegypti<br>GN=AAEL000142 PE=4 SV=1                           |
| CCG004897.1 | 2737 | 170  | 1210 | 2.66892762 | 15.45470036 | 2.5337136    | Up   | 3.53E-13  | 9.53E-13  | AAEL011682-PA OS=Aedes<br>aegypti GN=AAEL011682 PE=4<br>SV=1                                      |
| CCG027220.1 | 2829 | 238  | 1210 | 3.61498651 | 14.95210848 | 2.048286773  | Up   | 6.86E-13  | 1.73E-12  | AAEL011049-PA OS=Aedes<br>aegypti GN=AAEL011049 PE=4<br>SV=1                                      |
| CCG013174.1 | 716  | 361  | 1210 | 21.6649081 | 59.07753477 | 1.447249509  | Up   | 1.35E-13  | 4.08E-13  | AAEL000677-PA OS=Aedes<br>aegypti GN=AAEL000677 PE=4<br>SV=1                                      |

|             |       |       |      |            |             |              |      |           |           |                                                                               |
|-------------|-------|-------|------|------------|-------------|--------------|------|-----------|-----------|-------------------------------------------------------------------------------|
| CCG015917.1 | 35411 | 2354  | 1210 | 2.85647836 | 1.194530369 | -1.257794069 | Down | 7.38E-143 | 4.16E-142 | AAEL008347-PA OS=Aedes aegypti GN=AAEL008347 PE=4 SV=1                        |
| CCG001496.1 | 294   | 15    | 1211 | 2.1923334  | 143.9948067 | 6.037405758  | Up   | 1.48E-08  | 2.92E-08  | AAEL001511-PA OS=Aedes aegypti GN=AAEL001511 PE=4 SV=1                        |
| CCG025119.1 | 1078  | 219   | 1211 | 8.72947299 | 39.27131092 | 2.169509294  | Up   | 4.32E-13  | 1.14E-12  | AAEL005872-PA OS=Aedes aegypti GN=AAEL005872 PE=4 SV=1                        |
| CCG019267.1 | 2040  | 382   | 1211 | 8.04629344 | 20.75219273 | 1.366867525  | Up   | 6.17E-13  | 1.58E-12  | AAEL010060-PA OS=Aedes aegypti GN=AAEL010060 PE=4 SV=1                        |
| CCG021593.1 | 1116  | 300   | 1212 | 11.5510039 | 37.96544037 | 1.716668497  | Up   | 1.10E-13  | 3.42E-13  | AAEL008153-PB OS=Aedes aegypti GN=AAEL008153 PE=4 SV=1                        |
| CCG021825.3 | 1644  | 444   | 1212 | 11.6049648 | 25.77216025 | 1.151071321  | Up   | 6.43E-13  | 1.64E-12  | Arginyl-tRNA--protein transferase 1 OS=Aedes aegypti GN=AAEL005885 PE=3 SV=1  |
| CCG007989.1 | 1190  | 315   | 1213 | 11.3743415 | 35.63394095 | 1.647469021  | Up   | 4.28E-13  | 1.13E-12  | Golgi SNAP receptor complex member 1 OS=Aedes aegypti GN=AAEL006945 PE=3 SV=1 |
| CCG018968.1 | 5419  | 316   | 1213 | 2.50570883 | 7.825131892 | 1.642896291  | Up   | 3.23E-13  | 8.83E-13  | ADAM metalloprotease OS=Culex quinquefasciatus GN=CpipJ_CPIJ012681 PE=4 SV=1  |
| CCG000066.1 | 3021  | 392   | 1213 | 5.57568221 | 14.03654079 | 1.331967195  | Up   | 0         | 0         | AAEL007523-PA OS=Aedes aegypti GN=AAEL007523 PE=4 SV=1                        |
| CCG024447.1 | 1077  | 14067 | 1213 | 561.239793 | 39.37269241 | -3.833350026 | Down | 0         | 0         | AAEL011112-PA OS=Aedes aegypti GN=AAEL011112 PE=3 SV=1                        |
| CCG008741.1 | 954   | 234   | 1214 | 10.5397462 | 44.48568973 | 2.07750119   | Up   | 4.60E-13  | 1.20E-12  | Ecdysteroid receptor OS=Aedes albopictus GN=EcR PE=2 SV=1                     |
| CCG017332.1 | 3984  | 178   | 1215 | 1.91983252 | 10.66122146 | 2.473320371  | Up   | 1.15E-13  | 3.57E-13  | AAEL003605-PA OS=Aedes aegypti GN=AAEL003605 PE=4 SV=1                        |
| CCG025634.1 | 1776  | 270   | 1215 | 6.53256101 | 23.91571299 | 1.872238205  | Up   | 2.59E-13  | 7.26E-13  | Uncharacterized protein OS=Anopheles darlingi GN=AND_15285 PE=4 SV=1          |
| CCG019732.1 | 531   | 5888  | 1215 | 476.470428 | 79.98927736 | -2.574508154 | Down | 0         | 0         | AAEL010659-PB OS=Aedes aegypti GN=AAEL010659 PE=3 SV=1                        |
| CCG020698.1 | 1948  | 99    | 1216 | 2.18378015 | 21.82200439 | 3.320884097  | Up   | 0         | 0         | AAEL009725-PA OS=Aedes aegypti GN=AAEL009725 PE=4 SV=1                        |

|             |      |      |      |            |             |              |      |           |           |                                                                                                   |
|-------------|------|------|------|------------|-------------|--------------|------|-----------|-----------|---------------------------------------------------------------------------------------------------|
| CCG003779.1 | 1722 | 430  | 1216 | 10.729957  | 24.68598406 | 1.202047868  | Up   | 6.22E-13  | 1.59E-12  | Putative uncharacterized protein<br>OS=Culex quinquefasciatus<br>GN=CpipJ_CPIJ006642 PE=4<br>SV=1 |
| CCG023810.1 | 4077 | 2332 | 1216 | 24.5782245 | 10.42660401 | -1.237111356 | Down | 6.30E-138 | 3.53E-137 | AAEL0006958-PA OS=Aedes<br>aegypti GN=AAEL006958 PE=4<br>SV=1                                     |
| CCG007441.1 | 777  | 88   | 1218 | 4.86658513 | 54.79946089 | 3.493180003  | Up   | 2.93E-14  | 1.02E-13  | Putative uncharacterized protein<br>OS=Culex quinquefasciatus<br>GN=CpipJ_CPIJ010852 PE=4<br>SV=1 |
| CCG012023.1 | 7671 | 3846 | 1218 | 21.5436839 | 5.550668897 | -1.956531426 | Down | 0         | 0         | AAEL014367-PA OS=Aedes<br>aegypti GN=AAEL014367 PE=3<br>SV=1                                      |
| CCG013130.1 | 1112 | 342  | 1219 | 13.2155119 | 38.32206779 | 1.5359431    | Up   | 1.09E-13  | 3.41E-13  | AAEL000450-PA OS=Aedes<br>aegypti GN=AAEL006450 PE=4<br>SV=1                                      |
| CCG015869.2 | 7989 | 418  | 1219 | 2.24825999 | 5.334101813 | 1.246436482  | Up   | 6.74E-13  | 1.70E-12  | Putative uncharacterized protein<br>OS=Culex quinquefasciatus<br>GN=CpipJ_CPIJ018589 PE=4<br>SV=1 |
| CCG014837.1 | 2008 | 201  | 1220 | 4.30125332 | 21.23959047 | 2.303926945  | Up   | 0         | 0         | AAEL011709-PA (Fragment)<br>OS=Aedes aegypti<br>GN=AAEL011709 PE=4 SV=1                           |
| CCG005195.1 | 2967 | 205  | 1220 | 2.96892336 | 14.37448522 | 2.275498537  | Up   | 1.83E-13  | 5.31E-13  | AAEL004441-PA OS=Aedes<br>aegypti GN=AAEL004441 PE=4<br>SV=1                                      |
| CCG010365.1 | 321  | 2580 | 1220 | 345.364222 | 132.8632326 | -1.378176714 | Down | 4.95E-180 | 2.90E-179 | AAEL000544-PA OS=Aedes<br>aegypti GN=AAEL000544 PE=4<br>SV=1                                      |
| CCG027711.1 | 1272 | 26   | 1221 | 0.87831219 | 33.55664775 | 5.255720971  | Up   | 4.60E-12  | 1.05E-11  | AAEL009654-PA OS=Aedes<br>aegypti GN=AAEL009654 PE=4<br>SV=1                                      |
| CCG010718.1 | 2911 | 27   | 1221 | 0.3985513  | 14.66302162 | 5.201273187  | Up   | 2.28E-12  | 5.41E-12  | AAEL009469-PA OS=Aedes<br>aegypti GN=AAEL009469 PE=4<br>SV=1                                      |
| CCG012676.1 | 1065 | 73   | 1221 | 2.94534331 | 40.07892576 | 3.76633613   | Up   | 0         | 0         | AAEL001402-PA OS=Aedes<br>aegypti GN=AAEL001402 PE=4<br>SV=1                                      |
| CCG017157.1 | 4275 | 162  | 1221 | 1.62832679 | 9.984574489 | 2.616310686  | Up   | 0         | 0         | AAEL005031-PA OS=Aedes<br>aegypti GN=AAEL005031 PE=4<br>SV=1                                      |
| CCG010559.1 | 636  | 452  | 1222 | 30.5382391 | 67.16826135 | 1.137162811  | Up   | 1.12E-13  | 3.49E-13  | AAEL012875-PA OS=Aedes<br>aegypti GN=AAEL012875 PE=2<br>SV=1                                      |
| CCG027929.1 | 1824 | 49   | 1223 | 1.15434046 | 23.4396779  | 4.343812048  | Up   | 0         | 0         | AAEL015128-PA OS=Aedes<br>aegypti GN=AAEL015128 PE=4<br>SV=1                                      |

|             |      |      |      |            |             |              |      |           |           |                                                                                                         |
|-------------|------|------|------|------------|-------------|--------------|------|-----------|-----------|---------------------------------------------------------------------------------------------------------|
| CCG014219.1 | 1668 | 145  | 1223 | 3.73537861 | 25.63187799 | 2.778612802  | Up   | 0         | 0         | Ubiquitin ligase ES OS=Culex quinquefasciatus GN=CpipJ_CPIJ009489 PE=4 SV=1                             |
| CCG014726.1 | 3286 | 166  | 1223 | 2.17071696 | 13.0109472  | 2.583482461  | Up   | 1.83E-13  | 5.32E-13  | AAEL009738-PA OS=Aedes aegypti GN=AAEL009738 PE=4 SV=1                                                  |
| CCG014393.1 | 1064 | 304  | 1223 | 12.277067  | 40.18230497 | 1.710594379  | Up   | 0         | 0         | Proteasome subunit alpha type OS=Aedes aegypti GN=AAEL005830 PE=3 SV=1                                  |
| CCG005888.1 | 1317 | 2155 | 1224 | 70.3111451 | 32.48969686 | -1.113771107 | Down | 4.29E-108 | 2.30E-107 | 26S proteasome regulatory chain 4 OS=Aedes aegypti GN=AAEL012095 PE=2 SV=1                              |
| CCG010960.2 | 655  | 31   | 1226 | 2.0336821  | 65.43335469 | 5.007860157  | Up   | 2.40E-13  | 6.77E-13  | Deoxyuridine 5-triphosphate nucleotidohydrolase OS=Culex quinquefasciatus GN=CpipJ_CPIJ005616 PE=4 SV=1 |
| CCG028044.1 | 1437 | 39   | 1226 | 1.16619321 | 29.8252243  | 4.676654249  | Up   | 7.33E-14  | 2.38E-13  | WD repeat protein OS=Culex quinquefasciatus GN=CpipJ_CPIJ009423 PE=4 SV=1                               |
| CCG018832.1 | 4024 | 458  | 1226 | 4.89069047 | 10.65080699 | 1.122852679  | Up   | 1.14E-12  | 2.79E-12  | Peroxisome biogenesis factor 1 OS=Culex quinquefasciatus GN=CpipJ_CPIJ017662 PE=3 SV=1                  |
| CCG015755.1 | 1414 | 6548 | 1226 | 198.98573  | 30.31035879 | -2.714782139 | Down | 0         | 0         | AAEL006992-PA OS=Aedes aegypti GN=CYP6AG6 PE=3 SV=1                                                     |
| CCG018618.1 | 1307 | 156  | 1227 | 5.1287518  | 32.81851997 | 2.677830519  | Up   | 1.42E-13  | 4.26E-13  | AAEL011696-PA OS=Aedes aegypti GN=AAEL011696 PE=4 SV=1                                                  |
| CCG008136.1 | 1734 | 157  | 1227 | 3.89056997 | 24.73691211 | 2.668611989  | Up   | 0         | 0         | AAEL000257-PA OS=Aedes aegypti GN=AAEL000257 PE=4 SV=1                                                  |
| CCG007888.1 | 2599 | 345  | 1227 | 5.70394707 | 16.50396522 | 1.532780186  | Up   | 9.59E-13  | 2.38E-12  | -                                                                                                       |
| CCG028158.1 | 8380 | 2317 | 1227 | 11.8807727 | 5.118592554 | -1.214809591 | Down | 3.34E-133 | 1.86E-132 | AAEL011164-PA (Fragment) OS=Aedes aegypti GN=AAEL011164 PE=4 SV=1                                       |
| CCG016913.1 | 1974 | 222  | 1230 | 4.83246256 | 21.78251288 | 2.172339938  | Up   | 0         | 0         | AAEL011744-PA OS=Aedes aegypti GN=AAEL011744 PE=4 SV=1                                                  |
| CCG020835.1 | 2491 | 313  | 1230 | 5.39924807 | 17.26161398 | 1.676736957  | Up   | 0         | 0         | AAEL005180-PA OS=Aedes aegypti GN=AAEL005180 PE=4 SV=1                                                  |



|             |      |      |      |            |             |              |      |           |           |                                                                                               |
|-------------|------|------|------|------------|-------------|--------------|------|-----------|-----------|-----------------------------------------------------------------------------------------------|
| CCG010522.1 | 1667 | 6924 | 1230 | 178.47777  | 25.79404945 | -2.790634205 | Down | 0         | 0         | Mitochondrial NADH:ubiquinone oxidoreductase NDUFV1/51 kDa subunit OS=Aedes aegypti PE=2 SV=1 |
| CCG003993.1 | 8462 | 121  | 1231 | 0.61443369 | 5.085516274 | 3.049065013  | Up   | 0         | 0         | AAEL005388-PA OS=Aedes aegypti GN=AAEL005388 PE=4 SV=1                                        |
| CCG021069.1 | 1014 | 188  | 1231 | 7.96677525 | 42.4394859  | 2.413339399  | Up   | 1.80E-13  | 5.25E-13  | AAEL013408-PA OS=Aedes aegypti GN=AAEL013408 PE=4 SV=1                                        |
| CCG020124.1 | 1547 | 279  | 1231 | 7.74955136 | 27.81747816 | 1.843806938  | Up   | 0         | 0         | AAEL005103-PA OS=Aedes aegypti GN=AAEL005103 PE=4 SV=1                                        |
| CCG022001.1 | 1212 | 104  | 1232 | 3.68717195 | 35.53514603 | 3.268660026  | Up   | 0         | 0         | AAEL007084-PA OS=Aedes aegypti GN=AAEL007084 PE=4 SV=1                                        |
| CCG027258.1 | 1194 | 112  | 1233 | 4.03066187 | 36.10013003 | 3.162915366  | Up   | 0         | 0         | AAEL001321-PA OS=Aedes aegypti GN=AAEL001321 PE=3 SV=1                                        |
| CCG020505.1 | 2709 | 162  | 1233 | 2.56961868 | 15.91124225 | 2.630420285  | Up   | 0         | 0         | AGAP007646-PA OS=Anopheles gambiae GN=AGAP007646 PE=4 SV=2                                    |
| CCG027937.1 | 2047 | 206  | 1233 | 4.3242625  | 21.05693955 | 2.283769761  | Up   | 1.10E-13  | 3.43E-13  | -                                                                                             |
| CCG020030.1 | 1323 | 415  | 1233 | 13.4787905 | 32.58016271 | 1.273302762  | Up   | 0         | 0         | Uncharacterized protein OS=Anopheles darlingi GN=AND_08793 PE=4 SV=1                          |
| CCG023520.1 | 1686 | 2440 | 1234 | 62.18633   | 25.58630696 | -1.281225549 | Down | 2.59E-152 | 1.48E-151 | AAEL005895-PA OS=Aedes aegypti GN=AAEL005895 PE=4 SV=1                                        |
| CCG011210.1 | 897  | 0    | 1235 | 0.001      | 48.13096077 | 15.5546776   | Up   | 4.44E-16  | 1.63E-15  | AAEL013295-PA OS=Aedes aegypti GN=AAEL013295 PE=4 SV=1                                        |
| CCG009601.1 | 3846 | 82   | 1235 | 0.91615139 | 11.22555169 | 3.615056526  | Up   | 0         | 0         | AAEL005571-PA OS=Aedes aegypti GN=AAEL005571 PE=4 SV=1                                        |
| CCG006084.1 | 2101 | 129  | 1235 | 2.63831307 | 20.54901086 | 2.961381275  | Up   | 0         | 0         | AAEL005916-PA OS=Aedes aegypti GN=AAEL005916 PE=4 SV=1                                        |
| CCG011213.1 | 1560 | 209  | 1235 | 5.75684265 | 27.67530244 | 2.265249398  | Up   | 0         | 0         | AAEL014718-PA OS=Aedes aegypti GN=AAEL014718 PE=4 SV=1                                        |
| CCG008635.1 | 1473 | 342  | 1235 | 9.97667973 | 29.30989261 | 1.554756015  | Up   | 1.09E-13  | 3.41E-13  | AAEL008505-PA OS=Aedes aegypti GN=AAEL008505 PE=4 SV=1                                        |
| CCG019220.1 | 1923 | 391  | 1235 | 8.73695592 | 22.45110339 | 1.361583733  | Up   | 9.02E-13  | 2.25E-12  | AAEL014130-PA OS=Aedes aegypti GN=AAEL014130 PE=4 SV=1                                        |

|             |      |     |      |            |             |             |    |          |          |                                                                                                    |
|-------------|------|-----|------|------------|-------------|-------------|----|----------|----------|----------------------------------------------------------------------------------------------------|
| CCG001764.1 | 1188 | 393 | 1235 | 14.2147354 | 36.34130624 | 1.354223028 | Up | 1.08E-13 | 3.37E-13 | Suppressor of defective silencing<br>OS=Culex quinquefasciatus<br>GN=CpipJ_CPIJ016520 PE=4<br>SV-1 |
| CCG027316.1 | 1566 | 461 | 1235 | 12.6494557 | 27.5692668  | 1.12398559  | Up | 1.29E-13 | 3.95E-13 | AAEL013596-PA OS=Aedes<br>aegypti GN=AAEL013596 PE=4<br>SV-1                                       |
| CCG000709.1 | 2244 | 247 | 1236 | 4.7297346  | 19.25509362 | 2.025409    | Up | 0        | 0        | AAEL003147-PA OS=Aedes<br>aegypti GN=AAEL003147 PE=4<br>SV-1                                       |
| CCG011530.1 | 5720 | 315 | 1237 | 2.36634028 | 7.560032931 | 1.67573497  | Up | 4.28E-13 | 1.13E-12 | AAEL010892-PA OS=Aedes<br>aegypti GN=AAEL010892 PE=4<br>SV-1                                       |
| CCG013162.2 | 1818 | 217 | 1238 | 5.12895072 | 23.8054712  | 2.214557571 | Up | 1.47E-13 | 4.37E-13 | AAEL004053-PA OS=Aedes<br>aegypti GN=AAEL004053 PE=4<br>SV-1                                       |
| CCG016709.1 | 2541 | 284 | 1238 | 4.80259922 | 17.03201363 | 1.826361684 | Up | 0        | 0        | AAEL002215-PA OS=Aedes<br>aegypti GN=AAEL002215 PE=4<br>SV-1                                       |
| CCG001358.1 | 2454 | 257 | 1240 | 4.50009038 | 17.66432893 | 1.97281306  | Up | 4.14E-13 | 1.10E-12 | AAEL009084-PA OS=Aedes<br>aegypti GN=AAEL009084 PE=4<br>SV-1                                       |
| CCG007394.1 | 2601 | 158 | 1241 | 2.61023378 | 16.67943924 | 2.675819856 | Up | 0        | 0        | AAEL004075-PA OS=Aedes<br>aegypti GN=AAEL004075 PE=4<br>SV-1                                       |
| CCG002923.2 | 3888 | 227 | 1241 | 2.50877823 | 11.15823598 | 2.153052117 | Up | 0        | 0        | AAEL002488-PA OS=Aedes<br>aegypti GN=AAEL002488 PE=4<br>SV-1                                       |
| CCG004257.1 | 1212 | 305 | 1241 | 10.8133408 | 35.79473719 | 1.726935171 | Up | 5.30E-13 | 1.37E-12 | AAEL010640-PA OS=Aedes<br>aegypti GN=AAEL010640 PE=3<br>SV-1                                       |
| CCG018559.2 | 2800 | 471 | 1241 | 7.22812321 | 15.49400767 | 1.100017354 | Up | 0        | 0        | AAEL002190-PA OS=Aedes<br>aegypti GN=AAEL002190 PE=4<br>SV-1                                       |
| CCG028369.2 | 4449 | 280 | 1242 | 2.70432135 | 9.759087379 | 1.851479645 | Up | 0        | 0        | AAEL012168-PA OS=Aedes<br>aegypti GN=AAEL012168 PE=4<br>SV-1                                       |
| CCG011094.1 | 825  | 373 | 1243 | 19.4275285 | 52.67047034 | 1.438891965 | Up | 3.38E-13 | 9.18E-13 | AAEL007825-PA OS=Aedes<br>aegypti GN=AAEL007825 PE=4<br>SV-1                                       |
| CCG028240.1 | 756  | 90  | 1244 | 5.1154446  | 57.52393691 | 3.491230878 | Up | 0        | 0        | AAEL008784-PA OS=Aedes<br>aegypti GN=AAEL008784 PE=3<br>SV-1                                       |
| CCG012725.1 | 1951 | 101 | 1244 | 2.22447114 | 22.290157   | 3.324872491 | Up | 0        | 0        | AAEL004798-PA OS=Aedes<br>aegypti GN=AAEL004798 PE=4<br>SV-1                                       |
| CCG006924.1 | 1645 | 339 | 1244 | 8.85516111 | 26.43653271 | 1.577942511 | Up | 1.30E-13 | 3.98E-13 | AAEL008673-PA OS=Aedes<br>aegypti GN=AAEL008673 PE=3<br>SV-1                                       |
| CCG016095.1 | 933  | 63  | 1245 | 2.90149333 | 46.64850437 | 4.006963307 | Up | 0        | 0        | AAEL006712-PA OS=Aedes<br>aegypti GN=AAEL006712 PE=4<br>SV-1                                       |

|             |       |      |      |            |             |              |      |           |           |                                                                                                   |
|-------------|-------|------|------|------------|-------------|--------------|------|-----------|-----------|---------------------------------------------------------------------------------------------------|
| CCG025009.1 | 2215  | 417  | 1245 | 8.08956178 | 19.64923457 | 1.280339657  | Up   | 0         | 0         | AAEL015108-FA OS=Aedes<br>SV-1<br>aegypti GN=AAEL015108 PE=4                                      |
| CCG014368.1 | 1221  | 3047 | 1245 | 107.230779 | 35.64541735 | -1.588930554 | Down | 1.86E-262 | 1.15E-261 | AAEL014863-FA OS=Aedes<br>SV-1<br>aegypti GN=AAEL014863 PE=4                                      |
| CCG015620.1 | 744   | 0    | 1246 | 0.001      | 58.54571621 | 15.83727599  | Up   | 4.44E-16  | 1.65E-15  | AAEL007855-FA OS=Aedes<br>SV-1<br>aegypti GN=AAEL007855 PE=4                                      |
| CCG019672.1 | 1572  | 34   | 1246 | 0.92937085 | 27.70865958 | 4.897938716  | Up   | 8.82E-14  | 2.80E-13  | Putative uncharacterized protein<br>OS=Culex quinquefasciatus<br>GN=CpipJ_CPIJ001997 PE=4<br>SV-1 |
| CCG027410.1 | 1662  | 110  | 1246 | 2.84396559 | 26.20819065 | 3.204041843  | Up   | 0         | 0         | AAEL002821-FA OS=Aedes<br>SV-1<br>aegypti GN=AAEL002821 PE=4                                      |
| CCG016916.1 | 240   | 414  | 1246 | 74.1227922 | 181.4917202 | 1.291914599  | Up   | 8.70E-13  | 2.17E-12  | Putative uncharacterized protein<br>OS=Culex quinquefasciatus<br>GN=CpipJ_CPIJ007378 PE=4<br>SV-1 |
| CCG020769.1 | 4601  | 4144 | 1246 | 38.7017127 | 9.46707517  | -2.031406731 | Down | 0         | 0         | AAEL005937-FA OS=Aedes<br>SV-1<br>aegypti GN=AAEL005937 PE=3                                      |
| CCG020439.2 | 3065  | 200  | 1247 | 2.80389785 | 14.22282908 | 2.342702764  | Up   | 0         | 0         | DNA ligase 4 OS=Culex<br>quinquefasciatus<br>GN=CpipJ_CPIJ005161 PE=3<br>SV-1                     |
| CCG001753.1 | 1742  | 453  | 1247 | 11.1741044 | 25.0246677  | 1.163191714  | Up   | 9.90E-13  | 2.45E-12  | AAEL004497-FA OS=Aedes<br>SV-1<br>aegypti GN=AAEL004497 PE=4                                      |
| CCG013482.2 | 7623  | 2359 | 1247 | 13.2973375 | 5.718610932 | -1.21740075  | Down | 4.91E-136 | 2.75E-135 | AAEL007465-FA OS=Aedes<br>SV-1<br>aegypti GN=AAEL007465 PE=4                                      |
| CCG017975.1 | 4875  | 8609 | 1248 | 75.8823477 | 8.949318854 | -3.083914529 | Down | 0         | 0         | AAEL004099-FA OS=Aedes<br>SV-1<br>aegypti GN=AAEL004099 PE=4                                      |
| CCG003397.1 | 2707  | 458  | 1249 | 7.27009178 | 16.12962235 | 1.149667177  | Up   | 1.14E-12  | 2.79E-12  | AAEL005543-FA OS=Aedes<br>SV-1<br>aegypti GN=AAEL005543 PE=4                                      |
| CCG008473.2 | 37097 | 2689 | 1249 | 3.11468896 | 1.176992417 | -1.403983074 | Down | 6.55E-193 | 3.89E-192 | AAEL005627-FA OS=Aedes<br>SV-1<br>aegypti GN=AAEL005627 PE=4                                      |
| CCG027371.1 | 1479  | 84   | 1250 | 2.44047174 | 29.5455348  | 3.597708161  | Up   | 0         | 0         | AAEL012708-FA OS=Aedes<br>SV-1<br>aegypti GN=AAEL012708 PE=4                                      |
| CCG003553.1 | 1293  | 206  | 1250 | 6.84591286 | 33.79570454 | 2.303525056  | Up   | 1.10E-13  | 3.43E-13  | AAEL012235-FA OS=Aedes<br>SV-1<br>aegypti GN=AAEL012235 PE=2                                      |
| CCG002417.1 | 1497  | 2484 | 1251 | 71.3004815 | 29.21363009 | -1.28727018  | Down | 3.70E-156 | 2.12E-155 | AAEL001965-FA OS=Aedes<br>SV-1<br>aegypti GN=AAEL001965 PE=3                                      |

|             |      |      |      |            |             |              |      |           |           |                                                                      |
|-------------|------|------|------|------------|-------------|--------------|------|-----------|-----------|----------------------------------------------------------------------|
| CCG007041.1 | 828  | 410  | 1252 | 21.277284  | 52.85961657 | 1.312851951  | Up   | 1.25E-12  | 3.04E-12  | AAEL014104-PA OS=Aedes aegypti GN=AAEL014104 PE=4 SV=1               |
| CCG009676.1 | 1263 | 2574 | 1252 | 87.5725233 | 34.65381039 | -1.337464287 | Down | 1.43E-171 | 8.29E-171 | AAEL002917-PA OS=Aedes aegypti GN=AAEL002917 PE=4 SV=1               |
| CCG023046.1 | 1059 | 149  | 1253 | 6.04578891 | 41.36234258 | 2.774315383  | Up   | 2.33E-13  | 6.62E-13  | AAEL004570-PA OS=Aedes aegypti GN=AAEL004570 PE=4 SV=1               |
| CCG001911.1 | 2946 | 126  | 1254 | 1.83780942 | 14.88040702 | 3.017354913  | Up   | 1.34E-13  | 4.06E-13  | AAEL004364-PA OS=Aedes aegypti GN=AAEL004364 PE=4 SV=1               |
| CCG016237.1 | 2100 | 57   | 1255 | 1.16632137 | 20.89173207 | 4.162894838  | Up   | 0         | 0         | AAEL004326-PA OS=Aedes aegypti GN=AAEL004328 PE=4 SV=1               |
| CCG023053.1 | 1766 | 45   | 1257 | 1.09492529 | 24.88253335 | 4.506229042  | Up   | 0         | 0         | AAEL000422-PA OS=Aedes aegypti GN=AAEL000422 PE=4 SV=1               |
| CCG022900.1 | 9351 | 477  | 1257 | 2.19191139 | 4.699235793 | 1.100236682  | Up   | 0         | 0         | AAEL005229-PA OS=Aedes aegypti GN=AAEL003229 PE=4 SV=1               |
| CCG027328.1 | 5559 | 372  | 1258 | 2.87547064 | 7.911047343 | 1.4600706    | Up   | 1.17E-13  | 3.60E-13  | Uncharacterized protein OS=Anopheles darlingi GN=AND_13311 PE=4 SV=1 |
| CCG023429.1 | 2011 | 125  | 1259 | 2.67091836 | 21.88586298 | 3.034591487  | Up   | 2.35E-14  | 8.23E-14  | AAEL000988-PA OS=Aedes aegypti GN=AAEL000988 PE=4 SV=1               |
| CCG018220.1 | 1343 | 75   | 1261 | 2.39965011 | 32.82381758 | 3.773847074  | Up   | 0         | 0         | AAEL001192-PA OS=Aedes aegypti GN=AAEL001192 PE=4 SV=1               |
| CCG027718.1 | 2937 | 155  | 1261 | 2.26772518 | 15.00932482 | 2.726541359  | Up   | 3.42E-13  | 9.26E-13  | Transporter OS=Aedes aegypti GN=AAEL006800 PE=3 SV=1                 |
| CCG010384.1 | 975  | 375  | 1261 | 16.526821  | 45.21270463 | 1.451918979  | Up   | 0         | 0         | AAEL009846-PA OS=Aedes aegypti GN=AAEL009846 PE=4 SV=1               |
| CCG013775.1 | 1260 | 2096 | 1264 | 71.4798125 | 35.06925543 | -1.02732905  | Down | 2.32E-92  | 1.21E-91  | AAEL011081-PA OS=Aedes aegypti GN=AAEL011081 PE=4 SV=1               |
| CCG009079.1 | 2259 | 35   | 1265 | 0.66575507 | 19.57601599 | 4.877951856  | Up   | 6.39E-14  | 2.11E-13  | AAEL000681-PA OS=Aedes aegypti GN=AAEL006681 PE=4 SV=1               |
| CCG018202.1 | 984  | 113  | 1265 | 4.93453253 | 44.94128061 | 3.187055911  | Up   | 1.42E-13  | 4.27E-13  | AAEL000621-PA OS=Aedes aegypti GN=AAEL008621 PE=4 SV=1               |
| CCG015568.1 | 4719 | 224  | 1265 | 2.03967378 | 9.371099834 | 2.199879951  | Up   | 2.04E-13  | 5.88E-13  | AAEL000462-PA OS=Aedes aegypti GN=AAEL008462 PE=4 SV=1               |
| CCG014998.1 | 2371 | 2257 | 1265 | 40.9037077 | 18.65129486 | -1.13295583  | Down | 3.03E-116 | 1.65E-115 | AAEL002014-PA OS=Aedes aegypti GN=AAEL002014 PE=4 SV=1               |

|             |      |       |      |            |             |              |      |           |           |                                                                                           |
|-------------|------|-------|------|------------|-------------|--------------|------|-----------|-----------|-------------------------------------------------------------------------------------------|
| CCG020504.1 | 888  | 84    | 1266 | 4.06470463 | 49.83916486 | 3.61605747   | Up   | 0         | 0         | Glucosamine-6-phosphate isomerase OS=Culex quinquefasciatus GN=CpipJ_CPIJ008074 PE=3 SV=1 |
| CCG010517.1 | 2754 | 207   | 1266 | 3.22975129 | 16.07014466 | 2.314887936  | Up   | 6.88E-15  | 2.47E-14  | AAEL009789-PA OS=Aedes aegypti GN=AAEL009789 PE=4 SV=1                                    |
| CCG022853.1 | 1651 | 2344  | 1266 | 61.006092  | 26.80628613 | -1.186381961 | Down | 8.42E-130 | 4.67E-129 | AAEL005224-PA OS=Aedes aegypti GN=AAEL005224 PE=4 SV=1                                    |
| CCG016625.1 | 2595 | 76    | 1267 | 1.25845851 | 17.06826076 | 3.7615865    | Up   | 0         | 0         | AAEL002195-PA (Fragment) OS=Aedes aegypti GN=AAEL002195 PE=4 SV=1                         |
| CCG026045.1 | 3486 | 167   | 1267 | 2.05850421 | 12.70571907 | 2.62580972   | Up   | 1.62E-13  | 4.78E-13  | AAEL003391-PA OS=Aedes aegypti GN=AAEL003391 PE=4 SV=1                                    |
| CCG016807.1 | 4608 | 391   | 1267 | 3.64608642 | 9.612008826 | 1.398489216  | Up   | 9.02E-13  | 2.25E-12  | AAEL007449-PA OS=Aedes aegypti GN=AAEL007449 PE=4 SV=1                                    |
| CCG025284.1 | 1455 | 166   | 1268 | 4.90238897 | 30.46535735 | 2.635612803  | Up   | 1.83E-13  | 5.32E-13  | AAEL007035-PA OS=Aedes aegypti GN=AAEL007035 PE=3 SV=1                                    |
| CCG004320.1 | 786  | 480   | 1268 | 26.2410593 | 56.3957951  | 1.103761638  | Up   | 5.41E-13  | 1.39E-12  | AAEL006699-PA OS=Aedes aegypti GN=AAEL006699 PE=4 SV=1                                    |
| CCG009256.1 | 3051 | 105   | 1269 | 1.47880109 | 14.54016822 | 3.29754404   | Up   | 0         | 0         | AAEL014341-PA OS=Aedes aegypti GN=AAEL014341 PE=4 SV=1                                    |
| CCG006555.3 | 1985 | 341   | 1269 | 7.38170252 | 22.34864142 | 1.598161629  | Up   | 2.98E-13  | 8.25E-13  | AAEL000122-PA OS=Aedes aegypti GN=AAEL000122 PE=4 SV=1                                    |
| CCG012545.1 | 1201 | 490   | 1269 | 17.5313655 | 36.93759636 | 1.075151619  | Up   | 0         | 0         | Putative uncharacterized protein OS=Culex quinquefasciatus GN=CpipJ_CPIJ008696 PE=4 SV=1  |
| CCG020476.1 | 2750 | 289   | 1270 | 4.51572847 | 16.14436782 | 1.838000303  | Up   | 0         | 0         | AAEL001395-PA OS=Aedes aegypti GN=AAEL001395 PE=4 SV=1                                    |
| CCG010963.1 | 1339 | 387   | 1270 | 12.4191839 | 33.15684205 | 1.416736229  | Up   | 1.31E-12  | 3.18E-12  | AAEL000452-PA OS=Aedes aegypti GN=AAEL000452 PE=4 SV=1                                    |
| CCG013643.1 | 600  | 11466 | 1270 | 821.151628 | 73.99501917 | -3.472148578 | Down | 0         | 0         | AAEL009964-PA OS=Aedes aegypti GN=AAEL009964 PE=4 SV=1                                    |
| CCG001808.2 | 3684 | 55    | 1271 | 0.64151341 | 12.06079527 | 4.232701805  | Up   | 0         | 0         | AAEL003893-PA OS=Aedes aegypti GN=AAEL003893 PE=4 SV=1                                    |

|             |      |      |      |            |             |              |      |           |           |                                                                                     |
|-------------|------|------|------|------------|-------------|--------------|------|-----------|-----------|-------------------------------------------------------------------------------------|
| CCG011857.2 | 4951 | 397  | 1271 | 3.44556345 | 8.974342512 | 1.381066322  | Up   | 8.02E-13  | 2.01E-12  | AAEL014756-PA OS=Aedes aegypti GN=AAEL014756 PE=4 SV=1                              |
| CCG019182.1 | 1515 | 20   | 1272 | 0.56725722 | 29.35110763 | 5.693268064  | Up   | 3.69E-10  | 7.73E-10  | Cytochrome P450 6CB1 (Fragment) OS=Aedes aegypti GN=CYP6CB1 PE=2 SV=1               |
| CCG016776.1 | 2385 | 24   | 1272 | 0.43239985 | 18.64441428 | 5.430233658  | Up   | 1.93E-11  | 4.23E-11  | DNA-directed RNA polymerase OS=Culex quinquefasciatus GN=CpipJ_CPIJ002457 PE=3 SV=1 |
| CCG013502.1 | 2265 | 513  | 1272 | 9.73221804 | 19.63219782 | 1.012381143  | Up   | 0         | 0         | AAEL012514-PA OS=Aedes aegypti GN=AAEL012514 PE=4 SV=1                              |
| CCG018608.1 | 1052 | 31   | 1273 | 1.26621842 | 42.30217332 | 5.062133597  | Up   | 2.40E-13  | 6.76E-13  | AAEL005000-PA OS=Aedes aegypti GN=AAEL005000 PE=4 SV=1                              |
| CCG002640.1 | 1218 | 74   | 1273 | 2.61064069 | 36.53685249 | 3.806876542  | Up   | 0         | 0         | AAEL014441-PA OS=Aedes aegypti GN=AAEL014441 PE=4 SV=1                              |
| CCG005777.1 | 2013 | 130  | 1273 | 2.77499528 | 22.10724607 | 2.993962095  | Up   | 0         | 0         | AAEL007726-PA OS=Aedes aegypti GN=AAEL007726 PE=4 SV=1                              |
| CCG000340.1 | 1647 | 290  | 1274 | 7.56601277 | 27.04119284 | 1.837553676  | Up   | 1.62E-13  | 4.78E-13  | AAEL003670-PA OS=Aedes aegypti GN=AAEL003670 PE=4 SV=1                              |
| CCG022903.1 | 1698 | 178  | 1275 | 4.50448337 | 26.24958945 | 2.542861305  | Up   | 1.15E-13  | 3.57E-13  | AAEL010822-PA OS=Aedes aegypti GN=AAEL010822 PE=4 SV=1                              |
| CCG022741.1 | 2694 | 187  | 1277 | 2.98268017 | 16.57079415 | 2.473961554  | Up   | 3.31E-13  | 9.03E-13  | AAEL013896-PA (Fragment) OS=Aedes aegypti GN=AAEL013896 PE=4 SV=1                   |
| CCG005030.1 | 3405 | 201  | 1277 | 2.5365394  | 13.11063713 | 2.369804322  | Up   | 0         | 0         | AAEL013108-PA OS=Aedes aegypti GN=AAEL013108 PE=4 SV=1                              |
| CCG011949.1 | 3081 | 362  | 1277 | 5.04869975 | 14.48936041 | 1.521010126  | Up   | 1.06E-12  | 2.62E-12  | AAEL008413-PA (Fragment) OS=Aedes aegypti GN=AAEL008413 PE=4 SV=1                   |
| CCG007984.3 | 5709 | 2535 | 1277 | 19.0800976 | 7.819533971 | -1.286914018 | Down | 2.96E-159 | 1.70E-158 | AAEL004972-PA OS=Aedes aegypti GN=AAEL004972 PE=4 SV=1                              |
| CCG028207.1 | 1456 | 176  | 1278 | 5.19414374 | 30.6845314  | 2.562553706  | Up   | 0         | 0         | AAEL011317-PA OS=Aedes aegypti GN=AAEL011317 PE=3 SV=1                              |
| CCG009510.1 | 1650 | 184  | 1278 | 4.79177647 | 27.07677437 | 2.498423369  | Up   | 3.33E-13  | 9.08E-13  | AGAP006107-PC OS=Anopheles gambiae GN=AGAP006107 PE=4 SV=2                          |

|             |      |      |      |            |             |              |      |           |           |                                                                                                   |
|-------------|------|------|------|------------|-------------|--------------|------|-----------|-----------|---------------------------------------------------------------------------------------------------|
| CCG007638.1 | 1002 | 209  | 1278 | 8.96274904 | 44.58750271 | 2.314626193  | Up   | 0         | 0         | GI21485 OS=Drosophila<br>mojavensis GN=GI21485 PE=4<br>SV=1                                       |
| CCG018049.1 | 1014 | 263  | 1278 | 11.1450101 | 44.05983996 | 1.983066335  | Up   | 1.40E-14  | 4.97E-14  | -                                                                                                 |
| CCG010363.1 | 4995 | 2119 | 1278 | 18.2288023 | 8.944279823 | -1.027182548 | Down | 2.48E-93  | 1.30E-92  | AAEL001582-PA (Fragment)<br>OS=Aedes aegypti<br>GN=AAEL001582 PE=3 SV=1                           |
| CCG004929.1 | 1210 | 2226 | 1278 | 79.0501068 | 36.92287414 | -1.098252553 | Down | 4.11E-109 | 2.20E-108 | AAEL013739-PA OS=Aedes<br>aegypti GN=AAEL013739 PE=4<br>SV=1                                      |
| CCG006605.1 | 438  | 7047 | 1278 | 691.341826 | 102.0015473 | -2.760808174 | Down | 0         | 0         | AAEL001164-PA OS=Aedes<br>aegypti GN=AAEL001164 PE=4<br>SV=1                                      |
| CCG020230.3 | 2876 | 224  | 1279 | 3.34673872 | 15.54646592 | 2.215758831  | Up   | 2.04E-13  | 5.88E-13  | ES ubiquitin ligase protein CPT<br>OS=Culex quinquefasciatus<br>GN=CpipJ_CPIJ002840 PE=4<br>SV=1  |
| CCG026027.1 | 1412 | 487  | 1279 | 14.820298  | 31.66546458 | 1.095335791  | Up   | 0         | 0         | AAEL012586-PA OS=Aedes<br>aegypti GN=AAEL012586 PE=4<br>SV=1                                      |
| CCG025267.1 | 2253 | 343  | 1280 | 6.54177495 | 19.86089404 | 1.602176533  | Up   | 0         | 0         | AAEL008944-PA OS=Aedes<br>aegypti GN=AAEL008944 PE=4<br>SV=1                                      |
| CCG012226.3 | 6504 | 395  | 1280 | 2.60963179 | 6.879857667 | 1.398532456  | Up   | 0         | 0         | AGAP007503-PA OS=Anopheles<br>gambiae GN=AGAP007503 PE=4<br>SV=1                                  |
| CCG013756.1 | 3931 | 209  | 1281 | 2.2845776  | 11.39189838 | 2.318008832  | Up   | 0         | 0         | Putative uncharacterized protein<br>OS=Culex quinquefasciatus<br>GN=CpipJ_CPIJ009801 PE=4<br>SV=1 |
| CCG011664.1 | 1287 | 79   | 1282 | 2.63761386 | 34.82246373 | 3.722713002  | Up   | 0         | 0         | AAEL011535-PA OS=Aedes<br>aegypti GN=AAEL011535 PE=4<br>SV=1                                      |
| CCG022815.1 | 1511 | 268  | 1282 | 7.62136921 | 29.660166   | 1.96040456   | Up   | 0         | 0         | AAEL004384-PA OS=Aedes<br>aegypti GN=AAEL004384 PE=4<br>SV=1                                      |
| CCG025161.1 | 1389 | 353  | 1282 | 10.9203141 | 32.26530657 | 1.562969377  | Up   | 0         | 0         | AAEL015607-PA OS=Aedes<br>aegypti GN=AAEL015607 PE=4<br>SV=1                                      |
| CCG011941.3 | 2544 | 164  | 1283 | 2.77006151 | 17.63029446 | 2.670066654  | Up   | 1.14E-13  | 3.54E-13  | AAEL006488-PA (Fragment)<br>OS=Aedes aegypti<br>GN=AAEL006488 PE=4 SV=1                           |
| CCG027099.1 | 3187 | 2756 | 1283 | 37.1586409 | 14.0732567  | -1.400741514 | Down | 5.65E-197 | 3.36E-196 | -                                                                                                 |

|             |      |      |      |            |             |              |      |           |           |                                                                                                                             |
|-------------|------|------|------|------------|-------------|--------------|------|-----------|-----------|-----------------------------------------------------------------------------------------------------------------------------|
| CCG025042.1 | 1327 | 390  | 1284 | 12.6286334 | 33.82549162 | 1.421412377  | Up   | 6.59E-13  | 1.68E-12  | Putative uncharacterized protein OS=Culex quinquefasciatus GN=CpipJ_CPIJ001780 PE=4 SV=1                                    |
| CCG024571.1 | 3260 | 500  | 1284 | 6.59045009 | 13.76884275 | 1.062958406  | Up   | 2.39E-13  | 6.76E-13  | AAEL002788-PA OS=Aedes aegypti GN=AAEL002788 PE=4 SV=1                                                                      |
| CCG004887.1 | 3079 | 84   | 1285 | 1.17228246 | 14.58960236 | 3.637548425  | Up   | 0         | 0         | Chromosome 10 SCAF15019, whole genome shotgun sequence. (Fragment) OS=Tetraodon nigroviridis GN=GSTENG00032246001 PE=4 SV=1 |
| CCG024094.1 | 1068 | 240  | 1286 | 9.65612014 | 42.09395499 | 2.124097536  | Up   | 0         | 0         | AAEL013816-PA OS=Aedes aegypti GN=AAEL013816 PE=4 SV=1                                                                      |
| CCG025399.1 | 2661 | 282  | 1286 | 4.5537261  | 16.89452985 | 1.891436779  | Up   | 5.45E-13  | 1.40E-12  | AAEL005827-PA (Fragment) OS=Aedes aegypti GN=AAEL005827 PE=4 SV=1                                                           |
| CCG027517.1 | 1953 | 304  | 1286 | 6.68858132 | 23.01912132 | 1.783060618  | Up   | 0         | 0         | Anoctamin OS=Aedes aegypti GN=AAEL010243 PE=3 SV=1                                                                          |
| CCG017362.1 | 3059 | 149  | 1287 | 2.09300113 | 14.70784642 | 2.812941022  | Up   | 2.33E-13  | 6.63E-13  | AAEL008183-PA OS=Aedes aegypti GN=AAEL008183 PE=4 SV=1                                                                      |
| CCG024208.1 | 2879 | 308  | 1287 | 4.59697057 | 15.62740612 | 1.765323001  | Up   | 0         | 0         | AAEL010078-PA OS=Aedes aegypti GN=AAEL010078 PE=4 SV=1                                                                      |
| CCG012816.1 | 4878 | 2685 | 1287 | 23.6518527 | 9.223309185 | -1.358596831 | Down | 3.13E-183 | 1.84E-182 | AGAP007865-PA (Fragment) OS=Anopheles gambiae GN=AGAP007865 PE=4 SV=4                                                       |
| CCG017636.2 | 1848 | 5565 | 1287 | 129.397496 | 24.34594275 | -2.41005643  | Down | 0         | 0         | AAEL014609-PA (Fragment) OS=Aedes aegypti GN=CYP9J26 PE=3 SV=1                                                              |
| CCG017679.1 | 1857 | 49   | 1288 | 1.13382714 | 24.24677463 | 4.418520238  | Up   | 0         | 0         | AAEL007797-PA OS=Aedes aegypti GN=AAEL007797 PE=4 SV=1                                                                      |
| CCG025419.1 | 4716 | 86   | 1288 | 0.78358719 | 9.547553113 | 3.606965327  | Up   | 0         | 0         | AAEL009460-PA OS=Aedes aegypti GN=AAEL009460 PE=4 SV=1                                                                      |
| CCG016871.2 | 1108 | 117  | 1288 | 4.53741782 | 40.63741921 | 3.162865362  | Up   | 9.44E-14  | 2.97E-13  | AAEL005312-PE OS=Aedes aegypti PE=2 SV=1                                                                                    |



|             |      |     |      |            |             |             |    |          |          |                                                                                          |
|-------------|------|-----|------|------------|-------------|-------------|----|----------|----------|------------------------------------------------------------------------------------------|
| CCG013390.1 | 1946 | 135 | 1289 | 2.98094253 | 23.15581642 | 2.957534155 | Up | 1.90E-13 | 5.48E-13 | AAEL002483-PA OS=Aedes aegypti GN=AAEL002483 PE=4 SV=1                                   |
| CCG007489.1 | 3306 | 221 | 1289 | 2.87244747 | 13.63013272 | 2.246447193 | Up | 0        | 0        | AAEL001719-PA OS=Aedes aegypti GN=AAEL001719 PE=4 SV=1                                   |
| CCG010751.1 | 1593 | 65  | 1290 | 1.75331623 | 28.30896236 | 4.013100741 | Up | 0        | 0        | AAEL000676-PA OS=Aedes aegypti GN=AAEL006876 PE=4 SV=1                                   |
| CCG006716.1 | 1743 | 179 | 1290 | 4.41284136 | 25.87273496 | 2.551652777 | Up | 0        | 0        | AAEL004874-PA OS=Aedes aegypti GN=AAEL004874 PE=4 SV=1                                   |
| CCG002033.1 | 1671 | 384 | 1290 | 9.87455302 | 26.98753862 | 1.450506053 | Up | 1.03E-12 | 2.55E-12 | AAEL0006367-PA OS=Aedes aegypti GN=AAEL006367 PE=4 SV=1                                  |
| CCG001069.1 | 1857 | 514 | 1290 | 11.8936153 | 24.2844249  | 1.029844005 | Up | 1.57E-13 | 4.65E-13 | Putative uncharacterized protein OS=Culex quinquefasciatus GN=CpipJ_CPIJ006377 PE=4 SV=1 |
| CCG019307.1 | 975  | 0   | 1291 | 0.001      | 46.28834391 | 15.49836133 | Up | 4.44E-16 | 1.63E-15 | AAEL013715-PA OS=Aedes aegypti GN=AAEL013715 PE=3 SV=1                                   |
| CCG026849.1 | 2827 | 130 | 1291 | 1.9759694  | 15.96432095 | 3.014218676 | Up | 0        | 0        | AAEL002215-PA OS=Aedes aegypti GN=AAEL002215 PE=4 SV=1                                   |
| CCG020784.1 | 2166 | 243 | 1292 | 4.8207043  | 20.85230544 | 2.112891055 | Up | 1.53E-14 | 5.41E-14 | AAEL009815-PA OS=Aedes aegypti GN=AAEL009815 PE=4 SV=1                                   |
| CCG020471.1 | 2242 | 144 | 1293 | 2.75987591 | 20.16104008 | 2.868894762 | Up | 7.53E-14 | 2.44E-13 | Fanconi anemia group J protein OS=Danaus plexippus GN=KGM_13519 PE=4 SV=1                |
| CCG004926.1 | 1123 | 222 | 1293 | 8.49446223 | 40.2502688  | 2.244403897 | Up | 0        | 0        | AAEL007568-PA OS=Aedes aegypti GN=AAEL007568 PE=4 SV=1                                   |
| CCG012191.1 | 840  | 259 | 1293 | 13.2490015 | 53.81077603 | 2.022011476 | Up | 0        | 0        | AAEL009244-PA OS=Aedes aegypti GN=AAEL009244 PE=3 SV=1                                   |
| CCG002221.1 | 1728 | 127 | 1294 | 3.15807656 | 26.17824661 | 3.051250419 | Up | 1.57E-13 | 4.66E-13 | AAEL010349-PA OS=Aedes aegypti GN=AAEL010349 PE=4 SV=1                                   |
| CCG022486.1 | 1641 | 146 | 1294 | 3.82302331 | 27.5661244  | 2.850110547 | Up | 9.33E-15 | 3.34E-14 | AAEL012185-PA OS=Aedes aegypti GN=AAEL012185 PE=2 SV=1                                   |
| CCG004980.1 | 1724 | 236 | 1294 | 5.88216785 | 26.238985   | 2.157292056 | Up | 4.60E-13 | 1.20E-12 | AAEL003811-PA OS=Aedes aegypti GN=AAEL003811 PE=4 SV=1                                   |
| CCG005800.1 | 918  | 314 | 1294 | 14.6977088 | 49.2766995  | 1.745314357 | Up | 4.97E-14 | 1.68E-13 | AAEL011848-PA OS=Aedes aegypti GN=AAEL011848 PE=4 SV=1                                   |

|             |      |      |      |            |             |              |      |          |          |                                                                                          |
|-------------|------|------|------|------------|-------------|--------------|------|----------|----------|------------------------------------------------------------------------------------------|
| CCG023983.1 | 2146 | 86   | 1295 | 1.72199309 | 21.09551185 | 3.614784832  | Up   | 0        | 0        | AGAP004519-PA OS=Anopheles gambiae GN=AGAP004519 PE=4 SV=4                               |
| CCG020606.1 | 1968 | 105  | 1295 | 2.29259255 | 23.00354086 | 3.326804069  | Up   | 0        | 0        | AAEL002151-PA OS=Aedes aegypti GN=AAEL002151 PE=4 SV=1                                   |
| CCG024827.1 | 1319 | 440  | 1295 | 14.334104  | 34.32218986 | 1.259689873  | Up   | 0        | 0        | AAEL011399-PA OS=Aedes aegypti GN=AAEL011399 PE=4 SV=1                                   |
| CCG015943.1 | 3120 | 3406 | 1295 | 46.908627  | 14.50992578 | -1.692813133 | Down | 0        | 0        | AAEL006085-PA OS=Aedes aegypti GN=AAEL006085 PE=3 SV=1                                   |
| CCG009970.1 | 2565 | 224  | 1297 | 3.75252263 | 17.67675827 | 2.235921046  | Up   | 2.04E-13 | 5.88E-13 | Zinc finger protein 1 OS=Culex quinquefasciatus GN=CpipJ_CPIJ012784 PE=3 SV=1            |
| CCG006714.1 | 543  | 411  | 1298 | 32.5240533 | 83.56508886 | 1.361393288  | Up   | 0        | 0        | Signal recognition particle 9 kDa protein OS=Aedes aegypti GN=AAEL012049 PE=3 SV=1       |
| CCG025759.1 | 1029 | 51   | 1300 | 2.1296953  | 44.16497551 | 4.37418377   | Up   | 0        | 0        | AAEL011085-PA OS=Aedes aegypti GN=AAEL011085 PE=4 SV=1                                   |
| CCG006535.1 | 2232 | 111  | 1300 | 2.13693573 | 20.3610035  | 3.252193245  | Up   | 0        | 0        | AAEL007869-PA OS=Aedes aegypti GN=AAEL007869 PE=4 SV=1                                   |
| CCG027413.1 | 1605 | 183  | 1300 | 4.89935292 | 28.31511514 | 2.530909273  | Up   | 3.05E-13 | 8.41E-13 | AAEL000706-PA OS=Aedes aegypti GN=AAEL000706 PE=3 SV=1                                   |
| CCG003009.1 | 1130 | 173  | 1301 | 6.57855229 | 40.24842308 | 2.613090223  | Up   | 3.60E-13 | 9.69E-13 | AAEL000782-PA OS=Aedes aegypti GN=AAEL000782 PE=4 SV=1                                   |
| CCG000956.1 | 456  | 194  | 1301 | 18.2809836 | 99.73841684 | 2.447805608  | Up   | 5.97E-13 | 1.53E-12 | Putative uncharacterized protein OS=Culex quinquefasciatus GN=CpipJ_CPIJ013272 PE=4 SV=1 |
| CCG014027.1 | 1712 | 238  | 1301 | 5.97359628 | 26.56584    | 2.152900687  | Up   | 6.86E-13 | 1.73E-12 | Transcription factor Spo OS=Culex quinquefasciatus GN=CpipJ_CPIJ005037 PE=4 SV=1         |
| CCG021450.1 | 2679 | 241  | 1302 | 3.86551177 | 16.98980081 | 2.135937601  | Up   | 2.37E-13 | 6.72E-13 | Pita OS=Culex quinquefasciatus GN=CpipJ_CPIJ010913 PE=4 SV=1                             |
| CCG009333.1 | 2069 | 384  | 1302 | 7.97504983 | 21.99887692 | 1.463864436  | Up   | 1.03E-12 | 2.55E-12 | Asparagine synthetase OS=Aedes aegypti GN=AAEL015631 PE=4 SV=1                           |

|             |      |      |      |            |             |              |      |           |            |                                                                                          |
|-------------|------|------|------|------------|-------------|--------------|------|-----------|------------|------------------------------------------------------------------------------------------|
| CCG011511.1 | 2250 | 205  | 1303 | 3.91502026 | 20.2447265  | 2.370454473  | Up   | 1.83E-13  | 5.31E-13   | AAEL007048-PA OS=Aedes aegypti GN=AAEL007048 PE=4 SV=1                                   |
| CCG020279.1 | 1586 | 493  | 1304 | 13.3569225 | 28.74249238 | 1.105597522  | Up   | 6.97E-14  | 2.27E-13   | AAEL008480-PA OS=Aedes aegypti GN=AAEL008480 PE=4 SV=1                                   |
| CCG017940.1 | 6822 | 2796 | 1304 | 17.6111665 | 6.682144959 | -1.398107287 | Down | 3.11E-199 | 1.85E-198  | Putative uncharacterized protein OS=Culex quinquefasciatus GN=CpipJ_CPIJ014431 PE=4 SV=1 |
| CCG013061.1 | 588  | 2    | 1305 | 0.14615556 | 77.58597141 | 9.052147295  | Up   | 9.36E-05  | 0.00015325 | AAEL008182-PA OS=Aedes aegypti GN=AAEL008182 PE=4 SV=1                                   |
| CCG003013.1 | 2745 | 22   | 1305 | 0.34438403 | 16.61950863 | 5.592715677  | Up   | 8.38E-11  | 1.80E-10   | AAEL009404-PA OS=Aedes aegypti GN=AAEL009404 PE=4 SV=1                                   |
| CCG002741.1 | 2053 | 100  | 1305 | 2.09302166 | 22.22140827 | 3.408291106  | Up   | 0         | 0          | AAEL003542-PA OS=Aedes aegypti GN=AAEL003542 PE=4 SV=1                                   |
| CCG022129.1 | 1560 | 105  | 1305 | 2.89219368 | 29.24394307 | 3.337901778  | Up   | 0         | 0          | Alkaline phosphatase OS=Aedes aegypti GN=AAEL003298 PE=3 SV=1                            |
| CCG019369.1 | 2098 | 221  | 1305 | 4.52636385 | 21.74478131 | 2.264244736  | Up   | 0         | 0          | Chitin synthase OS=Aedes aegypti PE=2 SV=2                                               |
| CCG014967.1 | 1824 | 263  | 1305 | 6.19574573 | 25.0112671  | 2.013228306  | Up   | 1.40E-14  | 4.97E-14   | AAEL006544-PA OS=Aedes aegypti GN=AAEL006544 PE=4 SV=1                                   |
| CCG006067.1 | 1188 | 489  | 1305 | 17.6870372 | 38.40113736 | 1.11845664   | Up   | 1.91E-13  | 5.51E-13   | AAEL007043-PA OS=Aedes aegypti GN=AAEL007043 PE=4 SV=1                                   |
| CCG009701.1 | 975  | 511  | 1305 | 22.5205481 | 46.79030891 | 1.054967814  | Up   | 0         | 0          | AAEL010731-PA OS=Aedes aegypti GN=AAEL010731 PE=4 SV=1                                   |
| CCG022205.1 | 1431 | 108  | 1306 | 3.24299884 | 31.90461877 | 3.298364883  | Up   | 0         | 0          | AAEL003604-PA OS=Aedes aegypti GN=AAEL003604 PE=4 SV=1                                   |
| CCG022417.1 | 857  | 434  | 1306 | 21.7606357 | 53.27363998 | 1.291701153  | Up   | 0         | 0          | -                                                                                        |
| CCG019493.1 | 912  | 244  | 1307 | 11.4962886 | 50.09919708 | 2.123619292  | Up   | 2.78E-13  | 7.73E-13   | AAEL004285-PA OS=Aedes aegypti GN=AAEL004285 PE=4 SV=1                                   |
| CCG022189.1 | 848  | 254  | 1307 | 12.8706516 | 53.88026856 | 2.065671943  | Up   | 2.35E-13  | 6.67E-13   | -                                                                                        |
| CCG008941.1 | 642  | 515  | 1307 | 34.4694912 | 71.16895287 | 1.045928008  | Up   | 9.44E-13  | 2.34E-12   | AAEL013128-PA OS=Aedes aegypti GN=AAEL013128 PE=4 SV=1                                   |
| CCG021807.1 | 750  | 83   | 1308 | 4.7553173  | 60.96723469 | 3.680420598  | Up   | 1.32E-13  | 4.02E-13   | Lysozyme OS=Aedes albopictus PE=2 SV=1                                                   |

|             |       |      |      |            |             |              |      |           |           |                                                                                                           |
|-------------|-------|------|------|------------|-------------|--------------|------|-----------|-----------|-----------------------------------------------------------------------------------------------------------|
| CCG013295.1 | 1871  | 444  | 1308 | 10.1969867 | 24.43903047 | 1.261044163  | Up   | 6.43E-13  | 1.64E-12  | AAEL014720-PA OS=Aedes aegypti GN=AAEL014720 PE=4 SV=1                                                    |
| CCG023758.1 | 1104  | 133  | 1309 | 5.17660752 | 41.44962346 | 3.00128015   | Up   | 9.90E-14  | 3.11E-13  | AAEL003970-PA (Fragment) OS=Aedes aegypti GN=AAEL003970 PE=4 SV=1                                         |
| CCG003775.1 | 757   | 425  | 1309 | 24.1243556 | 60.449649   | 1.325243555  | Up   | 1.58E-12  | 3.80E-12  | AAEL013761-PA OS=Aedes aegypti GN=AAEL013761 PE=3 SV=1                                                    |
| CCG027651.2 | 1854  | 334  | 1310 | 7.74104173 | 24.70083202 | 1.673960008  | Up   | 3.15E-13  | 8.65E-13  | Putative uncharacterized protein OS=Culex quinquefasciatus GN=CpipJ_CPIJ000129 PE=4 SV=1                  |
| CCG025520.1 | 13752 | 7615 | 1311 | 23.7939594 | 3.332628043 | -2.835863147 | Down | 0         | 0         | Dynein heavy chain, cytosolic, putative OS=Pediculus humanus subsp. corporis GN=Phum_PHUM561990 PE=4 SV=1 |
| CCG026317.1 | 9864  | 337  | 1312 | 1.46804547 | 4.649762685 | 1.663260427  | Up   | 0         | 0         | AAEL003771-PA OS=Aedes aegypti GN=AAEL003771 PE=4 SV=1                                                    |
| CCG006461.1 | 359   | 428  | 1312 | 51.2285415 | 127.758382  | 1.318398222  | Up   | 1.52E-13  | 4.51E-13  | AAEL005951-PA OS=Aedes aegypti GN=AAEL005951 PE=4 SV=1                                                    |
| CCG011696.1 | 1584  | 15   | 1314 | 0.40691037 | 28.9994796  | 6.155172169  | Up   | 1.48E-08  | 2.92E-08  | Importin subunit alpha OS=Aedes aegypti GN=AAEL012960 PE=3 SV=1                                           |
| CCG010050.1 | 1914  | 155  | 1314 | 3.4797852  | 23.99956932 | 2.785938359  | Up   | 3.42E-13  | 9.25E-13  | AAEL005265-PA OS=Aedes aegypti GN=AAEL005265 PE=4 SV=1                                                    |
| CCG001411.1 | 2685  | 481  | 1314 | 7.69774389 | 17.10807288 | 1.15216968   | Up   | 0         | 0         | AAEL003768-PA OS=Aedes aegypti GN=AAEL003768 PE=4 SV=1                                                    |
| CCG023849.1 | 1488  | 132  | 1315 | 3.8118313  | 30.89390723 | 3.018766169  | Up   | 1.46E-13  | 4.36E-13  | AAEL015615-PA OS=Aedes aegypti GN=AAEL015615 PE=4 SV=1                                                    |
| CCG002711.1 | 2109  | 90   | 1316 | 1.83370133 | 21.81369949 | 3.572403881  | Up   | 0         | 0         | AAEL007578-PA OS=Aedes aegypti GN=AAEL007578 PE=4 SV=1                                                    |
| CCG007874.3 | 10660 | 2386 | 1316 | 9.61780364 | 4.315674693 | -1.15612135  | Down | 8.51E-127 | 4.71E-126 | Receptor protein-tyrosine phosphatase 10d OS=Culex quinquefasciatus GN=CpipJ_CPIJ006052 PE=4 SV=1         |

|             |      |      |      |            |             |              |      |           |           |                                                                                           |
|-------------|------|------|------|------------|-------------|--------------|------|-----------|-----------|-------------------------------------------------------------------------------------------|
| CCG012586.1 | 1865 | 219  | 1317 | 5.04577581 | 24.68635416 | 2.290565774  | Up   | 4.32E-13  | 1.14E-12  | AAEL003690-PA OS=Aedes aegypti GN=AAEL003690 PE=4 SV=1                                    |
| CCG017299.1 | 2710 | 308  | 1317 | 4.88364511 | 16.98894853 | 1.798566293  | Up   | 0         | 0         | inhibitor of kappa kinase epsilon OS=Culex quinquefasciatus GN=CpipJ_CPIJ006852 PE=4 SV=1 |
| CCG000473.1 | 774  | 2301 | 1317 | 127.743358 | 59.48326939 | -1.102692434 | Down | 1.87E-113 | 1.01E-112 | Larval chymotrypsin-like protein (Precursor) OS=Aedes aegypti PE=2 SV=1                   |
| CCG016335.2 | 3828 | 4886 | 1317 | 54.8459047 | 12.02718143 | -2.189085314 | Down | 0         | 0         | AAEL003104-PA OS=Aedes aegypti GN=AAEL003104 PE=4 SV=1                                    |
| CCG024446.1 | 1908 | 130  | 1318 | 2.92770728 | 24.14832746 | 3.044080046  | Up   | 0         | 0         | AAEL011124-PA OS=Aedes aegypti GN=AAEL011124 PE=4 SV=1                                    |
| CCG008714.1 | 816  | 219  | 1320 | 11.5323185 | 56.5501536  | 2.293848358  | Up   | 4.32E-13  | 1.14E-12  | AAEL002705-PA OS=Aedes aegypti GN=AAEL002705 PE=4 SV=1                                    |
| CCG005019.1 | 2485 | 379  | 1320 | 6.55353296 | 18.56938645 | 1.50258138   | Up   | 1.40E-13  | 4.20E-13  | Putative uncharacterized protein OS=Culex quinquefasciatus GN=CpipJ_CPIJ000685 PE=4 SV=1  |
| CCG008043.1 | 4455 | 136  | 1321 | 1.31175845 | 10.36585491 | 2.982265114  | Up   | 1.70E-13  | 4.98E-13  | AAEL001361-PA (Fragment) OS=Aedes aegypti GN=AAEL001361 PE=4 SV=1                         |
| CCG026822.1 | 2949 | 467  | 1321 | 6.80463413 | 15.65950614 | 1.202449215  | Up   | 5.22E-14  | 1.75E-13  | AAEL000730-PA OS=Aedes aegypti GN=AAEL000730 PE=4 SV=1                                    |
| CCG020323.1 | 3201 | 526  | 1321 | 7.06094358 | 14.42670528 | 1.030808966  | Up   | 1.08E-13  | 3.37E-13  | AAEL011267-PA OS=Aedes aegypti GN=AAEL011267 PE=4 SV=1                                    |
| CCG008705.1 | 2868 | 2775 | 1321 | 41.5763646 | 16.10177253 | -1.368544101 | Down | 2.00E-191 | 1.18E-190 | AAEL003194-PA OS=Aedes aegypti GN=AAEL003194 PE=4 SV=1                                    |
| CCG023623.1 | 1809 | 403  | 1322 | 9.57258322 | 25.54717628 | 1.416183637  | Up   | 0         | 0         | Uncharacterized protein OS=Anopheles darlingi GN=AND_15504 PE=4 SV=1                      |
| CCG003743.1 | 2325 | 15   | 1323 | 0.27722409 | 19.89238717 | 6.165019954  | Up   | 1.48E-08  | 2.93E-08  | Putative uncharacterized protein OS=Culex quinquefasciatus GN=CpipJ_CPIJ002513 PE=4 SV=1  |
| CCG018789.1 | 2630 | 112  | 1323 | 1.82988984 | 17.58547535 | 3.264555628  | Up   | 0         | 0         | AAEL013688-PA OS=Aedes aegypti GN=AAEL013688 PE=4 SV=1                                    |

|             |       |      |      |            |             |              |      |           |           |                                                                    |
|-------------|-------|------|------|------------|-------------|--------------|------|-----------|-----------|--------------------------------------------------------------------|
| CCG025867.1 | 4446  | 201  | 1325 | 1.94262633 | 10.41828986 | 2.423038157  | Up   | 0         | 0         | AAEL007270-PA OS=Aedes aegypti GN=AAEL007270 PE=4 SV=1             |
| CCG028311.1 | 4848  | 266  | 1325 | 2.35766283 | 9.554397014 | 2.018807413  | Up   | 4.09E-14  | 1.40E-13  | AAEL003391-PA OS=Aedes aegypti GN=AAEL003391 PE=4 SV=1             |
| CCG027696.1 | 482   | 6    | 1327 | 0.53489296 | 96.24405244 | 7.491303358  | Up   | 8.38E-06  | 1.47E-05  | Predicted protein OS=Nematostella vectensis GN=v1g229551 PE=3 SV=1 |
| CCG011239.1 | 975   | 81   | 1328 | 3.56979334 | 47.6149657  | 3.737502632  | Up   | 4.46E-14  | 1.51E-13  | AAEL012551-PA OS=Aedes aegypti GN=AAEL012551 PE=4 SV=1             |
| CCG020644.1 | 1005  | 339  | 1328 | 14.4942687 | 46.19362344 | 1.672211172  | Up   | 1.30E-13  | 3.98E-13  | AAEL011667-PA OS=Aedes aegypti GN=AAEL011667 PE=4 SV=1             |
| CCG019086.1 | 2001  | 207  | 1329 | 4.44514496 | 23.21816583 | 2.384951636  | Up   | 6.88E-15  | 2.47E-14  | AAEL005495-PA (Fragment) OS=Aedes aegypti GN=AAEL005495 PE=4 SV=1  |
| CCG001246.1 | 1742  | 435  | 1329 | 10.7301002 | 26.67023526 | 1.313567002  | Up   | 1.05E-12  | 2.58E-12  | AAEL000460-PA OS=Aedes aegypti GN=AAEL000460 PE=4 SV=1             |
| CCG002024.1 | 1617  | 96   | 1331 | 2.55107886 | 28.7751802  | 3.495645559  | Up   | 0         | 0         | AAEL009880-PA OS=Aedes aegypti GN=AAEL009880 PE=4 SV=1             |
| CCG011009.1 | 2838  | 2218 | 1331 | 33.5824071 | 16.39516081 | -1.03443559  | Down | 1.01E-98  | 5.32E-98  | -                                                                  |
| CCG024742.1 | 2338  | 256  | 1332 | 4.70498377 | 19.9163493  | 2.081691571  | Up   | 0         | 0         | AAEL004950-PA OS=Aedes aegypti GN=AAEL004950 PE=4 SV=1             |
| CCG014912.1 | 3640  | 53   | 1333 | 0.62565822 | 12.80202828 | 4.354853814  | Up   | 0         | 0         | AAEL006331-PA OS=Aedes aegypti GN=AAEL006331 PE=4 SV=1             |
| CCG010192.1 | 963   | 324  | 1333 | 14.457107  | 48.38980575 | 1.742924266  | Up   | 0         | 0         | AAEL001211-PA OS=Aedes aegypti GN=AAEL001211 PE=4 SV=1             |
| CCG014231.1 | 12311 | 385  | 1333 | 1.34378587 | 3.785182596 | 1.494059633  | Up   | 7.93E-13  | 1.99E-12  | AAEL003899-PA OS=Aedes aegypti GN=AAEL003899 PE=4 SV=1             |
| CCG022381.1 | 1899  | 2434 | 1333 | 55.0754787 | 24.53890623 | -1.166339184 | Down | 3.99E-131 | 2.22E-130 | AAEL001770-PA OS=Aedes aegypti GN=AAEL001770 PE=4 SV=1             |
| CCG024246.1 | 984   | 196  | 1334 | 8.55901218 | 47.39262319 | 2.469146311  | Up   | 7.93E-14  | 2.55E-13  | AAEL010411-PA OS=Aedes aegypti GN=AAEL010411 PE=4 SV=1             |
| CCG010142.1 | 1523  | 373  | 1334 | 10.5237761 | 30.62005333 | 1.540824335  | Up   | 3.38E-13  | 9.19E-13  | AAEL009448-PA OS=Aedes aegypti GN=AAEL009448 PE=4 SV=1             |
| CCG021818.1 | 1773  | 124  | 1336 | 3.00521551 | 26.34193896 | 3.131821186  | Up   | 1.61E-13  | 4.76E-13  | AAEL008890-PA OS=Aedes aegypti GN=AAEL008890 PE=3 SV=1             |

|             |       |       |      |            |             |              |      |          |          |                                                                                    |
|-------------|-------|-------|------|------------|-------------|--------------|------|----------|----------|------------------------------------------------------------------------------------|
| CCG022947.1 | 2605  | 203   | 1336 | 3.34850523 | 17.9286978  | 2.420681579  | Up   | 9.28E-14 | 2.93E-13 | AAEL011212-PA OS=Aedes aegypti GN=AAEL011212 PE=4 SV=1                             |
| CCG001365.1 | 2053  | 12991 | 1336 | 271.904443 | 22.74927315 | -3.579207372 | Down | 0        | 0        | AAEL004294-PA OS=Aedes aegypti GN=AAEL004294 PE=3 SV=1                             |
| CCG004799.1 | 822   | 72    | 1337 | 3.76377237 | 56.86036015 | 3.917171952  | Up   | 0        | 0        | AAEL001955-PA OS=Aedes aegypti GN=AAEL001955 PE=4 SV=1                             |
| CCG024551.1 | 1686  | 85    | 1338 | 2.16632707 | 27.7426894  | 3.678784668  | Up   | 0        | 0        | AAEL003339-PA OS=Aedes aegypti GN=AAEL003339 PE=4 SV=1                             |
| CCG001268.1 | 2273  | 164   | 1338 | 3.10032401 | 20.57816732 | 2.7306236    | Up   | 1.14E-13 | 3.54E-13 | Canal debranching enzyme OS=Culex quinquefasciatus GN=CpipJ_CPIJ004547 PE=4 SV=1   |
| CCG003229.1 | 11395 | 477   | 1338 | 1.79873308 | 4.104798098 | 1.190330148  | Up   | 0        | 0        | AAEL007980-PA OS=Aedes aegypti GN=AAEL007980 PE=4 SV=1                             |
| CCG016773.1 | 1650  | 412   | 1339 | 10.7294125 | 28.36917127 | 1.402752922  | Up   | 3.41E-13 | 9.25E-13 | AAEL001886-PA OS=Aedes aegypti GN=AAEL001886 PE=4 SV=1                             |
| CCG006246.1 | 1050  | 10078 | 1339 | 412.427605 | 44.58012628 | -3.209668292 | Down | 0        | 0        | AAEL003430-PA OS=Aedes aegypti GN=AAEL003430 PE=4 SV=1                             |
| CCG018636.1 | 3634  | 255   | 1340 | 3.01521253 | 12.89050382 | 2.095977052  | Up   | 0        | 0        | AAEL004526-PA OS=Aedes aegypti GN=AAEL004526 PE=4 SV=1                             |
| CCG009558.1 | 1137  | 3717  | 1340 | 140.473618 | 41.19972812 | -1.769592484 | Down | 0        | 0        | AAEL006194-PA OS=Aedes aegypti GN=AAEL006194 PE=4 SV=1                             |
| CCG004352.1 | 1212  | 4750  | 1340 | 168.404488 | 38.65024    | -2.123381309 | Down | 0        | 0        | AAEL006194-PA OS=Aedes aegypti GN=AAEL006194 PE=4 SV=1                             |
| CCG003310.1 | 1008  | 325   | 1341 | 13.8543291 | 46.50699321 | 1.747110818  | Up   | 1.19E-13 | 3.66E-13 | AAEL011106-PA OS=Aedes aegypti GN=AAEL011106 PE=4 SV=1                             |
| CCG007653.4 | 2725  | 498   | 1341 | 7.85281755 | 17.20332079 | 1.131404794  | Up   | 3.42E-13 | 9.26E-13 | AAEL006031-PA OS=Aedes aegypti GN=AAEL006031 PE=4 SV=1                             |
| CCG005016.1 | 1443  | 55    | 1342 | 1.63779307 | 32.51143966 | 4.311122446  | Up   | 0        | 0        | AAEL014037-PA OS=Aedes aegypti GN=AAEL014037 PE=4 SV=1                             |
| CCG013246.1 | 1712  | 158   | 1342 | 3.96566476 | 27.40304172 | 2.788701412  | Up   | 0        | 0        | Ryndremine 5-monooxygenase OS=Culex quinquefasciatus GN=CpipJ_CPIJ017147 PE=4 SV=1 |
| CCG024831.1 | 318   | 210   | 1342 | 28.3762398 | 147.5283252 | 2.378236642  | Up   | 0        | 0        | AAEL005884-PA OS=Aedes aegypti GN=AAEL005884 PE=4 SV=1                             |

|             |      |      |      |            |             |             |      |          |          |                                                                                               |
|-------------|------|------|------|------------|-------------|-------------|------|----------|----------|-----------------------------------------------------------------------------------------------|
| CCG023673.3 | 2040 | 277  | 1342 | 5.83461593 | 22.99706246 | 1.978739994 | Up   | 0        | 0        | AAEL002080-PA OS=Aedes aegypti GN=AAEL002080 PE=4 SV=1                                        |
| CCG019717.1 | 1904 | 355  | 1342 | 8.01168896 | 24.63970978 | 1.620806946 | Up   | 2.28E-13 | 6.52E-13 | AAEL003292-PA (Fragment) OS=Aedes aegypti GN=AAEL003292 PE=4 SV=1                             |
| CCG003239.1 | 2043 | 399  | 1342 | 8.39203334 | 22.96329292 | 1.452237224 | Up   | 0        | 0        | AAEL010860-PA (Fragment) OS=Aedes aegypti GN=AAEL010860 PE=4 SV=1                             |
| CCG011500.1 | 2886 | 123  | 1344 | 1.83135044 | 16.27994594 | 3.152116121 | Up   | 0        | 0        | AAEL007863-PA OS=Aedes aegypti GN=AAEL007863 PE=4 SV=1                                        |
| CCG028409.1 | 394  | 320  | 1345 | 34.8992768 | 119.3372646 | 1.773775566 | Up   | 0        | 0        | AAEL004284-PA OS=Aedes aegypti GN=AAEL004284 PE=4 SV=1                                        |
| CCG007914.1 | 1572 | 208  | 1348 | 5.68556285 | 29.97694471 | 2.398478267 | Up   | 3.93E-13 | 1.05E-12 | AAEL003514-PA OS=Aedes aegypti GN=AAEL003514 PE=4 SV=1                                        |
| CCG021007.1 | 1637 | 315  | 1348 | 8.2684584  | 28.78665674 | 1.799709967 | Up   | 4.28E-13 | 1.13E-12 | AAEL004464-PA OS=Aedes aegypti GN=AAEL004464 PE=4 SV=1                                        |
| CCG003714.1 | 805  | 483  | 1350 | 25.7818408 | 58.62568154 | 1.185177517 | Up   | 0        | 0        | AAEL002435-PA OS=Aedes aegypti GN=AAEL002435 PE=4 SV=1                                        |
| CCG014954.1 | 2324 | 3971 | 1350 | 73.4220379 | 20.30708849 | -1.85422975 | Down | 0        | 0        | AGAP007051-PA OS=Anopheles gambiae GN=AGAP007051 PE=4 SV=4                                    |
| CCG024096.1 | 1485 | 68   | 1351 | 1.96763768 | 31.80379254 | 4.014662322 | Up   | 0        | 0        | AAEL013820-PA OS=Aedes aegypti GN=AAEL013820 PE=4 SV=1                                        |
| CCG010912.1 | 3316 | 350  | 1351 | 4.53540625 | 14.24265136 | 1.650914051 | Up   | 3.00E-14 | 1.04E-13 | AAEL008382-PA OS=Aedes aegypti GN=AAEL008382 PE=4 SV=1                                        |
| CCG027000.1 | 2169 | 333  | 1352 | 6.5970132  | 21.79049802 | 1.723814273 | Up   | 4.41E-13 | 1.16E-12 | Transcriptional repressor protein YY1 OS=Culex quinquefasciatus GN=CpipJ_CPIJ014689 PE=4 SV=1 |
| CCG022351.1 | 1965 | 382  | 1352 | 8.35340388 | 24.05271766 | 1.525763812 | Up   | 6.17E-13 | 1.58E-12 | AAEL001506-PA OS=Aedes aegypti GN=AAEL001506 PE=4 SV=1                                        |
| CCG016275.1 | 1803 | 415  | 1352 | 9.89042699 | 26.21386034 | 1.406225114 | Up   | 0        | 0        | AAEL010587-PA OS=Aedes aegypti GN=AAEL010587 PE=4 SV=1                                        |
| CCG014838.1 | 1764 | 101  | 1353 | 2.46028526 | 26.8132361  | 3.446047845 | Up   | 0        | 0        | AAEL011707-PA OS=Aedes aegypti GN=AAEL011707 PE=4 SV=1                                        |



|             |      |     |      |            |             |             |    |          |          |                                                                                        |
|-------------|------|-----|------|------------|-------------|-------------|----|----------|----------|----------------------------------------------------------------------------------------|
| CCG001345.1 | 5892 | 145 | 1353 | 1.05746971 | 8.027587996 | 2.924350238 | Up | 0        | 0        | AAEL008618-PA OS=Aedes aegypti GN=AAEL008618 PE=4 SV=1                                 |
| CCG024235.1 | 879  | 203 | 1353 | 9.92361334 | 53.80949769 | 2.438923411 | Up | 9.28E-14 | 2.93E-13 | AAEL010642-PA OS=Aedes aegypti GN=AAEL010642 PE=4 SV=1                                 |
| CCG021034.1 | 5904 | 248 | 1353 | 1.80496175 | 8.01127176  | 2.150063017 | Up | 5.86E-14 | 1.95E-13 | AAEL008557-PA (Fragment) OS=Aedes aegypti GN=AAEL008557 PE=4 SV=1                      |
| CCG012987.1 | 1871 | 31  | 1354 | 0.71195178 | 25.29850708 | 5.151128917 | Up | 2.40E-13 | 6.77E-13 | AAEL001666-PA OS=Aedes aegypti GN=AAEL001666 PE=4 SV=1                                 |
| CCG009896.1 | 1842 | 40  | 1354 | 0.93311042 | 25.69680062 | 4.783397133 | Up | 6.86E-14 | 2.24E-13 | AAEL004698-PA OS=Aedes aegypti GN=AAEL004698 PE=4 SV=1                                 |
| CCG014519.1 | 2109 | 91  | 1354 | 1.85407579 | 22.44357835 | 3.597530587 | Up | 0        | 0        | AAEL007578-PA OS=Aedes aegypti GN=AAEL007578 PE=4 SV=1                                 |
| CCG008609.1 | 1587 | 454 | 1354 | 12.2925391 | 29.82577615 | 1.27877674  | Up | 3.16E-13 | 8.66E-13 | AAEL010321-PA OS=Aedes aegypti GN=AAEL010321 PE=3 SV=1                                 |
| CCG020032.1 | 2130 | 493 | 1354 | 9.94557707 | 22.22230364 | 1.159881391 | Up | 6.97E-14 | 2.28E-13 | AAEL004633-PA OS=Aedes aegypti GN=AAEL004633 PE=4 SV=1                                 |
| CCG024079.1 | 2025 | 89  | 1355 | 1.88854636 | 23.39183458 | 3.630656909 | Up | 0        | 0        | AAEL006549-PA OS=Aedes aegypti GN=AAEL006549 PE=4 SV=1                                 |
| CCG017175.1 | 1389 | 97  | 1355 | 3.0007662  | 34.10256661 | 3.506477498 | Up | 3.62E-14 | 1.25E-13 | AAEL011309-PA OS=Aedes aegypti GN=AAEL011309 PE=3 SV=1                                 |
| CCG027741.1 | 780  | 219 | 1357 | 12.0645793 | 60.81843792 | 2.33373115  | Up | 4.32E-13 | 1.14E-12 | Putative salivary secreted peptide of the 13 kDa family OS=Aedes triseriatus PE=2 SV=1 |
| CCG018182.1 | 1424 | 314 | 1357 | 9.47506788 | 33.31347021 | 1.81389746  | Up | 4.97E-14 | 1.68E-13 | AAEL002581-PA OS=Aedes aegypti GN=AAEL002581 PE=4 SV=1                                 |
| CCG003545.1 | 3810 | 411 | 1357 | 4.63531783 | 12.45101879 | 1.425523626 | Up | 0        | 0        | AAEL002061-PA OS=Aedes aegypti GN=AAEL002061 PE=3 SV=1                                 |
| CCG017655.1 | 1821 | 420 | 1357 | 9.91064719 | 26.05073124 | 1.394272692 | Up | 1.84E-13 | 5.32E-13 | AAEL000064-PA OS=Aedes aegypti GN=DCE PE=2 SV=1                                        |
| CCG007433.1 | 1203 | 457 | 1357 | 16.3234985 | 39.43340115 | 1.272467854 | Up | 1.13E-12 | 2.77E-12 | AAEL004108-PA OS=Aedes aegypti GN=AAEL004108 PE=4 SV=1                                 |
| CCG001121.2 | 2220 | 516 | 1357 | 9.98755994 | 21.36864035 | 1.097290954 | Up | 9.75E-14 | 3.07E-13 | AAEL005734-PA (Fragment) OS=Aedes aegypti GN=AAEL005734 PE=4 SV=1                      |

|             |       |      |      |            |             |              |      |           |           |                                                                                         |
|-------------|-------|------|------|------------|-------------|--------------|------|-----------|-----------|-----------------------------------------------------------------------------------------|
| CCG017935.1 | 1185  | 262  | 1358 | 9.50048141 | 40.06189017 | 2.076157967  | Up   | 0         | 0         | AAEL003645-PA OS=Aedes aegypti GN=AAEL003645 PE=3 SV=1                                  |
| CCG001635.1 | 3090  | 498  | 1358 | 6.92521936 | 15.36354041 | 1.149579036  | Up   | 3.42E-13  | 9.27E-13  | AAEL001205-PA OS=Aedes aegypti GN=Aael_AAEL001205 PE=4 SV=1                             |
| CCG006050.2 | 4747  | 502  | 1358 | 4.54409243 | 10.00070357 | 1.138037414  | Up   | 6.14E-13  | 1.57E-12  | AAEL001244-PA OS=Aedes aegypti GN=AAEL001244 PE=4 SV=1                                  |
| CCG002109.1 | 2406  | 538  | 1358 | 9.60836127 | 19.7312302  | 1.038118606  | Up   | 1.07E-13  | 3.33E-13  | AAEL003379-PA OS=Aedes aegypti GN=AAEL003379 PE=4 SV=1                                  |
| CCG002419.1 | 15520 | 4728 | 1358 | 13.0902645 | 3.058849218 | -2.097433352 | Down | 0         | 0         | AAEL001963-PA OS=Aedes aegypti GN=AAEL001963 PE=4 SV=1                                  |
| CCG008436.1 | 1446  | 420  | 1359 | 12.4808358 | 32.85497796 | 1.396397427  | Up   | 1.84E-13  | 5.32E-13  | AAEL002562-PA OS=Aedes aegypti GN=AAEL002562 PE=4 SV=1                                  |
| CCG014944.1 | 939   | 470  | 1359 | 21.5077479 | 50.5945667  | 1.234125998  | Up   | 1.05E-12  | 2.59E-12  | AAEL003680-PA OS=Aedes aegypti GN=AAEL003680 PE=4 SV=1                                  |
| CCG020662.1 | 1331  | 2391 | 1359 | 77.1905601 | 35.69368755 | -1.11275547  | Down | 1.52E-119 | 8.33E-119 | AAEL004042-PA OS=Aedes aegypti GN=AAEL004042 PE=2 SV=1                                  |
| CCG025660.1 | 2068  | 252  | 1361 | 5.23615722 | 23.00687364 | 2.135484632  | Up   | 5.42E-14  | 1.81E-13  | AAEL001331-PA OS=Aedes aegypti GN=AAEL001331 PE=2 SV=1                                  |
| CCG022002.1 | 2235  | 414  | 1362 | 7.95949446 | 21.30343309 | 1.420337234  | Up   | 8.70E-13  | 2.17E-12  | AAEL007100-PA OS=Aedes aegypti GN=AAEL007100 PE=4 SV=1                                  |
| CCG024119.1 | 802   | 5776 | 1362 | 309.467814 | 59.36804609 | -2.382030835 | Down | 0         | 0         | AAEL013744-PA OS=Aedes aegypti GN=AAEL013744 PE=2 SV=1                                  |
| CCG000603.1 | 5355  | 32   | 1365 | 0.25677526 | 8.910933295 | 5.11699844   | Up   | 1.77E-13  | 5.16E-13  | AAEL005656-PA OS=Aedes aegypti GN=AAEL005656 PE=4 SV=1                                  |
| CCG018725.1 | 861   | 507  | 1365 | 25.3027357 | 55.4216583  | 1.131156503  | Up   | 8.62E-13  | 2.15E-12  | AAEL004983-PA OS=Aedes aegypti GN=AAEL004983 PE=4 SV=1                                  |
| CCG008281.1 | 1158  | 4    | 1366 | 0.14842741 | 41.23748365 | 8.118054972  | Up   | 2.95E-05  | 5.04E-05  | AAEL000828-PA OS=Aedes aegypti GN=AAEL000828 PE=3 SV=1                                  |
| CCG022465.1 | 1152  | 77   | 1366 | 2.872109   | 41.45226221 | 3.851268431  | Up   | 0         | 0         | Cen growth-regulating nuclear protein OS=Culex quinquefasciatus GN=Cqnl103225 PE=4 SV=1 |
| CCG019480.1 | 1854  | 280  | 1366 | 6.48949606 | 25.75674545 | 1.988771955  | Up   | 0         | 0         | AAEL000589-PA OS=Aedes aegypti GN=AAEL000589 PE=4 SV=1                                  |
| CCG026086.1 | 876   | 7794 | 1366 | 382.312913 | 54.51256401 | -2.810093244 | Down | 0         | 0         | AAEL003235-PA OS=Aedes aegypti GN=AAEL003235 PE=4 SV=1                                  |

|             |      |       |      |            |             |              |      |           |           |                                                                                          |
|-------------|------|-------|------|------------|-------------|--------------|------|-----------|-----------|------------------------------------------------------------------------------------------|
| CCG002509.1 | 2301 | 62    | 1367 | 1.15781119 | 20.76834609 | 4.164914421  | Up   | 0         | 0         | AGAP011312-PA (Fragment)<br>OS=Anopheles gambiae<br>GN=AGAP011312 PE=4 SV=4              |
| CCG021608.1 | 1062 | 193   | 1367 | 7.80900073 | 44.99808319 | 2.526653694  | Up   | 6.08E-14  | 2.02E-13  | AAEL0008392-PA OS=Aedes<br>aegypti GN=AAEL008392 PE=4<br>SV=1                            |
| CCG025894.1 | 2546 | 164   | 1370 | 2.7678855  | 18.81101303 | 2.764721377  | Up   | 1.14E-13  | 3.54E-13  | Zinc finger protein 169 OS=Culex<br>quinquefasciatus<br>GN=CpipJ_CPIJ004616 PE=4<br>SV=1 |
| CCG027415.1 | 588  | 2721  | 1370 | 198.844639 | 81.45040677 | -1.28764786  | Down | 6.08E-171 | 3.53E-170 | AAEL000713-PA OS=Aedes<br>aegypti GN=AAEL000713 PE=4<br>SV=1                             |
| CCG006549.1 | 2433 | 71    | 1371 | 1.25394622 | 19.69905362 | 3.97357894   | Up   | 0         | 0         | AAEL000999-PA OS=Aedes<br>aegypti GN=AAEL000999 PE=3<br>SV=1                             |
| CCG006647.1 | 1572 | 249   | 1373 | 6.80627476 | 30.53289695 | 2.165427182  | Up   | 0         | 0         | AAEL000736-PA OS=Aedes<br>aegypti GN=AAEL005736 PE=4<br>SV=1                             |
| CCG009894.1 | 2090 | 230   | 1374 | 4.72872678 | 22.98213985 | 2.280989442  | Up   | 3.85E-13  | 1.03E-12  | AAEL000698-PA OS=Aedes<br>aegypti GN=AAEL006988 PE=4<br>SV=1                             |
| CCG018420.1 | 1542 | 501   | 1374 | 13.9609838 | 31.14959292 | 1.157812699  | Up   | 0         | 0         | AAEL000860-PA OS=Aedes<br>aegypti GN=AAEL000860 PE=4<br>SV=1                             |
| CCG010114.1 | 1512 | 10514 | 1374 | 298.798803 | 31.7676404  | -3.233544527 | Down | 0         | 0         | AAEL005617-PA OS=Aedes<br>aegypti GN=UGP PE=2 SV=1                                       |
| CCG016021.1 | 1970 | 2551  | 1376 | 55.6425345 | 24.41755779 | -1.188269225 | Down | 1.92E-141 | 1.08E-140 | AAEL002163-PA OS=Aedes<br>aegypti GN=AAEL002163 PE=4<br>SV=1                             |
| CCG004750.1 | 1304 | 111   | 1377 | 3.6576998  | 36.91529687 | 3.335210182  | Up   | 0         | 0         | AAEL012176-PA OS=Aedes<br>aegypti GN=AAEL012176 PE=4<br>SV=1                             |
| CCG022924.1 | 2195 | 195   | 1377 | 3.81735683 | 21.93054538 | 2.522295734  | Up   | 2.26E-13  | 6.47E-13  | AAEL002563-PA OS=Aedes<br>aegypti GN=AAEL002563 PE=4<br>SV=1                             |
| CCG015556.1 | 4242 | 274   | 1377 | 2.77550855 | 11.34784232 | 2.031593965  | Up   | 0         | 0         | AAEL000545-PA OS=Aedes<br>aegypti GN=AAEL005450 PE=4<br>SV=1                             |
| CCG025395.1 | 1890 | 329   | 1377 | 7.47991677 | 25.46960165 | 1.767682274  | Up   | 0         | 0         | AAEL000659-PA OS=Aedes<br>aegypti GN=AAEL006659 PE=4<br>SV=1                             |
| CCG007700.1 | 674  | 351   | 1377 | 22.3774137 | 71.42069305 | 1.674298828  | Up   | 4.44E-15  | 1.60E-14  | AAEL000382-PA OS=Aedes<br>aegypti GN=AAEL005382 PE=4<br>SV=1                             |
| CCG007765.1 | 2223 | 216   | 1378 | 4.17519689 | 21.67004291 | 2.375785874  | Up   | 1.38E-13  | 4.17E-13  | AAEL000944-PA OS=Aedes<br>aegypti GN=AAEL009644 PE=4<br>SV=1                             |

|             |      |      |      |            |             |              |      |           |           |                                                                                                          |
|-------------|------|------|------|------------|-------------|--------------|------|-----------|-----------|----------------------------------------------------------------------------------------------------------|
| CCG004515.1 | 2860 | 87   | 1379 | 1.3071213  | 16.85575653 | 3.688776449  | Up   | 0         | 0         | AAEL004502-PA OS=Aedes aegypti GN=AAEL004562 PE=4 SV=1                                                   |
| CCG013887.1 | 1446 | 209  | 1380 | 6.21070161 | 33.36267078 | 2.425406623  | Up   | 0         | 0         | AAEL002101-PA OS=Aedes aegypti GN=AAEL002101 PE=4 SV=1                                                   |
| CCG016222.1 | 560  | 23   | 1381 | 1.76482839 | 86.20960754 | 5.610248852  | Up   | 4.01E-11  | 8.68E-11  | Deoxyuridine 5'-triphosphate nucleotidohydrolase OS=Culex quinquefasciatus GN=CpipJ_CPIJ005616 PE=4 SV=1 |
| CCG002102.1 | 629  | 222  | 1381 | 15.1657887 | 76.75259177 | 2.339394942  | Up   | 0         | 0         | Uncharacterized protein OS=Anopheles darlingi GN=AND_16009 PE=4 SV=1                                     |
| CCG005367.1 | 621  | 162  | 1382 | 11.209496  | 77.79764654 | 2.795005101  | Up   | 0         | 0         | AAEL012993-PA OS=Aedes aegypti GN=AAEL012993 PE=4 SV=1                                                   |
| CCG003037.2 | 2430 | 315  | 1382 | 5.57015078 | 19.88162078 | 1.835647086  | Up   | 4.28E-13  | 1.13E-12  | AAEL013503-PA OS=Aedes aegypti GN=AAEL013503 PE=4 SV=1                                                   |
| CCG026666.1 | 1368 | 106  | 1384 | 3.32952622 | 35.36714551 | 3.409020977  | Up   | 0         | 0         | AAEL010402-PA OS=Aedes aegypti GN=AAEL010402 PE=3 SV=1                                                   |
| CCG004685.1 | 3468 | 94   | 1385 | 1.16469292 | 13.96113418 | 3.583394613  | Up   | 0         | 0         | AAEL009662-PA OS=Aedes aegypti GN=AAEL009662 PE=4 SV=1                                                   |
| CCG025667.2 | 3840 | 116  | 1386 | 1.29804407 | 12.61775302 | 3.281043751  | Up   | 1.16E-13  | 3.58E-13  | AAEL000984-PA (Fragment) OS=Aedes aegypti GN=AAEL000984 PE=4 SV=1                                        |
| CCG005354.1 | 1196 | 278  | 1387 | 9.98794835 | 40.5410785  | 2.021124203  | Up   | 2.11E-14  | 7.38E-14  | S107p: RNA polymerase II holoenzyme component OS=Culex quinquefasciatus GN=CpipJ_CPIJ013518 PE=4 SV=1    |
| CCG003402.1 | 2215 | 74   | 1388 | 1.43555773 | 21.90613461 | 3.931651691  | Up   | 0         | 0         | AAEL013237-PA OS=Aedes aegypti GN=AAEL013237 PE=4 SV=1                                                   |
| CCG007925.1 | 3327 | 89   | 1388 | 1.14947592 | 14.58433669 | 3.665371625  | Up   | 0         | 0         | Raptorin OS=Culex quinquefasciatus GN=CpipJ_CPIJ004643 PE=4 SV=1                                         |
| CCG025206.1 | 1758 | 120  | 1388 | 2.93308769 | 27.60073274 | 3.234214461  | Up   | 0         | 0         | AAEL011816-PA OS=Aedes aegypti GN=AAEL011816 PE=4 SV=1                                                   |
| CCG003587.1 | 6493 | 2346 | 1388 | 15.5254886 | 7.472984469 | -1.054882242 | Down | 1.14E-107 | 6.10E-107 | AAEL006222-PA OS=Aedes aegypti GN=AAEL006222 PE=4 SV=1                                                   |

|             |      |       |      |            |             |              |      |          |          |                                                                          |
|-------------|------|-------|------|------------|-------------|--------------|------|----------|----------|--------------------------------------------------------------------------|
| CCG008041.1 | 2445 | 205   | 1390 | 3.60277938 | 19.87403056 | 2.463702272  | Up   | 1.83E-13 | 5.30E-13 | AAEL001361-PA (Fragment)<br>OS=Aedes aegypti<br>GN=AAEL001361 PE=4 SV=1  |
| CCG026572.1 | 1462 | 391   | 1390 | 11.4919058 | 33.23666533 | 1.532157574  | Up   | 9.02E-13 | 2.25E-12 | AAEL009307-PA (Fragment)<br>OS=Aedes aegypti<br>GN=AAEL009307 PE=4 SV=1  |
| CCG009046.1 | 1274 | 108   | 1391 | 3.64264626 | 38.16873076 | 3.389332406  | Up   | 0        | 0        | AAEL008049-PA OS=Aedes<br>aegypti GN=AAEL008049 PE=4<br>SV=1             |
| CCG023877.1 | 1050 | 537   | 1391 | 21.97595   | 46.31139332 | 1.07544163   | Up   | 3.67E-13 | 9.84E-13 | AAEL000090-PA OS=Aedes<br>aegypti GN=AAEL000090 PE=4<br>SV=1             |
| CCG019112.1 | 1860 | 7425  | 1391 | 171.532408 | 26.14352849 | -2.713955402 | Down | 0        | 0        | Malic enzyme OS=Aedes aegypti<br>GN=AAEL001091 PE=3 SV=1                 |
| CCG015402.1 | 1623 | 10139 | 1393 | 268.435083 | 30.00423878 | -3.161335001 | Down | 0        | 0        | AAEL004294-PA OS=Aedes<br>aegypti GN=AAEL004294 PE=3<br>SV=1             |
| CCG020983.1 | 1926 | 245   | 1394 | 5.46603582 | 25.30209648 | 2.210690111  | Up   | 3.40E-13 | 9.24E-13 | AAEL002646-PA OS=Aedes<br>aegypti GN=AAEL002646 PE=4<br>SV=1             |
| CCG023952.1 | 1086 | 269   | 1394 | 10.6435162 | 44.87277884 | 2.075865687  | Up   | 0        | 0        | AAEL012416-PA OS=Aedes<br>aegypti GN=AAEL012416 PE=4<br>SV=1             |
| CCG001013.1 | 345  | 357   | 1394 | 44.4643341 | 141.2517038 | 1.667547786  | Up   | 3.04E-13 | 8.39E-13 | 40S ribosomal protein S21<br>OS=Aedes aegypti<br>GN=AAEL000529 PE=3 SV=1 |
| CCG005810.1 | 1701 | 378   | 1395 | 9.54882991 | 28.66948624 | 1.586120186  | Up   | 1.08E-12 | 2.65E-12 | AAEL001014-PA OS=Aedes<br>aegypti GN=AAEL001014 PE=4<br>SV=1             |
| CCG027247.1 | 327  | 11953 | 1395 | 1570.69492 | 149.133933  | -3.396722525 | Down | 0        | 0        | AAEL004457-PA OS=Aedes<br>aegypti GN=AAEL004457 PE=3<br>SV=1             |
| CCG026230.1 | 1305 | 99    | 1396 | 3.25977297 | 37.39598036 | 3.52003981   | Up   | 0        | 0        | AAEL012100-PA OS=Aedes<br>aegypti GN=AAEL012100 PE=4<br>SV=1             |
| CCG024172.1 | 2572 | 114   | 1396 | 1.90456833 | 18.97424354 | 3.316506416  | Up   | 8.48E-14 | 2.70E-13 | AAEL009285-PA OS=Aedes<br>aegypti GN=AAEL009285 PE=3<br>SV=1             |
| CCG010254.1 | 1721 | 201   | 1396 | 5.01854541 | 28.3566266  | 2.498344739  | Up   | 0        | 0        | AGAP013497-PA OS=Anopheles<br>gambiae GN=AgaP_AGAP013497<br>PE=4 SV=1    |
| CCG023939.1 | 1473 | 376   | 1396 | 10.9685134 | 33.13085837 | 1.594807578  | Up   | 3.71E-14 | 1.28E-13 | AAEL003935-PA OS=Aedes<br>aegypti GN=AAEL003935 PE=4<br>SV=1             |

|             |      |       |      |            |             |              |      |           |           |                                                                                          |
|-------------|------|-------|------|------------|-------------|--------------|------|-----------|-----------|------------------------------------------------------------------------------------------|
| CCG012769.2 | 5304 | 3264  | 1396 | 26.4429136 | 9.200934083 | -1.523028912 | Down | 4.86E-264 | 3.01E-263 | AAEL010384-PA OS=Aedes aegypti GN=AAEL010384 PE=4 SV=1                                   |
| CCG016189.1 | 2103 | 191   | 1397 | 3.90262449 | 23.22240259 | 2.573000681  | Up   | 6.68E-14  | 2.19E-13  | AAEL011535-PA OS=Aedes aegypti GN=AAEL011535 PE=4 SV=1                                   |
| CCG019812.1 | 2199 | 278   | 1397 | 5.43228114 | 22.20860057 | 2.031488437  | Up   | 2.11E-14  | 7.39E-14  | AAEL005020-PA OS=Aedes aegypti GN=AAEL005020 PE=4 SV=1                                   |
| CCG008851.2 | 7118 | 564   | 1397 | 3.40473874 | 6.861016107 | 1.010878157  | Up   | 9.30E-13  | 2.31E-12  | Putative uncharacterized protein OS=Culex quinquefasciatus GN=CpipJ_CPIJ017078 PE=4 SV=1 |
| CCG021081.1 | 1819 | 306   | 1398 | 7.22855349 | 26.86732871 | 1.894074007  | Up   | 0         | 0         | AAEL001638-PA OS=Aedes aegypti GN=AAEL001638 PE=4 SV=1                                   |
| CCG005601.1 | 2163 | 440   | 1398 | 8.74095387 | 22.59439248 | 1.370102136  | Up   | 0         | 0         | AAEL011636-PA OS=Aedes aegypti GN=AAEL011636 PE=4 SV=1                                   |
| CCG012914.1 | 426  | 10617 | 1399 | 1070.91472 | 114.8042939 | -3.221595096 | Down | 0         | 0         | AAEL005292-PA OS=Aedes aegypti GN=AAEL005292 PE=4 SV=1                                   |
| CCG006252.1 | 942  | 48    | 1401 | 2.18954062 | 51.99208679 | 4.569591944  | Up   | 5.35E-14  | 1.80E-13  | AAEL010593-PA OS=Aedes aegypti GN=AAEL010593 PE=4 SV=1                                   |
| CCG003973.1 | 2960 | 216   | 1401 | 3.13562928 | 16.54613032 | 2.399666942  | Up   | 1.38E-13  | 4.17E-13  | AAEL010459-PA OS=Aedes aegypti GN=AAEL010459 PE=4 SV=1                                   |
| CCG020710.1 | 2960 | 368   | 1402 | 5.34218322 | 16.55794055 | 1.632021882  | Up   | 3.69E-13  | 9.90E-13  | AAEL007197-PA OS=Aedes aegypti GN=AAEL007197 PE=4 SV=1                                   |
| CCG009854.1 | 1661 | 391   | 1402 | 10.115091  | 29.50722699 | 1.544559041  | Up   | 9.02E-13  | 2.25E-12  | AAEL012460-PA OS=Aedes aegypti GN=AAEL012460 PE=4 SV=1                                   |
| CCG023937.1 | 2026 | 109   | 1403 | 2.31179717 | 24.20852039 | 3.388428173  | Up   | 0         | 0         | AAEL014814-PA OS=Aedes aegypti GN=AAEL014814 PE=4 SV=1                                   |
| CCG011599.1 | 1443 | 351   | 1404 | 10.4520976 | 34.01345848 | 1.702313204  | Up   | 4.44E-15  | 1.60E-14  | AAEL002101-PA OS=Aedes aegypti GN=AAEL002101 PE=4 SV=1                                   |
| CCG009436.1 | 1176 | 276   | 1405 | 10.0847336 | 41.76562829 | 2.050143162  | Up   | 0         | 0         | AAEL004839-PA OS=Aedes aegypti GN=AAEL004839 PE=3 SV=1                                   |
| CCG024360.1 | 1523 | 296   | 1405 | 8.35130758 | 32.24975631 | 1.949214253  | Up   | 2.26E-13  | 6.47E-13  | AAEL013261-PA OS=Aedes aegypti GN=AAEL013261 PE=4 SV=1                                   |
| CCG009090.1 | 6237 | 3040  | 1405 | 20.9440425 | 7.87500062  | -1.411187989 | Down | 1.62E-219 | 9.76E-219 | AAEL010061-PA OS=Aedes aegypti GN=AAEL010061 PE=4 SV=1                                   |

|             |       |      |      |            |             |              |      |          |          |                                                                              |
|-------------|-------|------|------|------------|-------------|--------------|------|----------|----------|------------------------------------------------------------------------------|
| CCG005936.1 | 4296  | 372  | 1406 | 3.72084294 | 11.44118649 | 1.620535272  | Up   | 1.17E-13 | 3.60E-13 | AAEL009490-PA (Fragment)<br>OS=Aedes aegypti<br>GN=AAEL009490 PE=3 SV=1      |
| CCG001925.1 | 3000  | 469  | 1406 | 6.71760184 | 16.38377905 | 1.28624997   | Up   | 0        | 0        | AAEL001205-PA OS=Aedes<br>aegypti GN=Aael_AAEL001205<br>PE=4 SV=1            |
| CCG019484.1 | 1896  | 99   | 1407 | 2.24367285 | 25.94213893 | 3.531363197  | Up   | 0        | 0        | AAEL009789-PA OS=Aedes<br>aegypti GN=AAEL009789 PE=4<br>SV=1                 |
| CCG004230.1 | 1227  | 455  | 1407 | 15.9341722 | 40.08663033 | 1.330997082  | Up   | 0        | 0        | AAEL009533-PA OS=Aedes<br>aegypti GN=AAEL009533 PE=4<br>SV=1                 |
| CCG024493.1 | 2007  | 441  | 1409 | 9.44178025 | 24.54220826 | 1.378134255  | Up   | 0        | 0        | SKeritropin OS=Culex<br>quinquefasciatus<br>GN=CpipJ_CPIJ009263 PE=4<br>SV=1 |
| CCG002684.1 | 4775  | 246  | 1410 | 2.21372874 | 10.32275817 | 2.221278146  | Up   | 2.51E-13 | 7.05E-13 | AAEL011960-PA OS=Aedes<br>aegypti GN=AAEL011960 PE=4<br>SV=1                 |
| CCG018305.1 | 2865  | 521  | 1410 | 7.81404249 | 17.20459695 | 1.138653089  | Up   | 0        | 0        | AAEL002114-PA OS=Aedes<br>aegypti GN=AAEL002114 PE=4<br>SV=1                 |
| CCG019255.1 | 3777  | 6060 | 1410 | 68.9427037 | 13.05034955 | -2.401309427 | Down | 0        | 0        | AAEL003129-PA OS=Aedes<br>aegypti GN=AAEL003129 PE=4<br>SV=1                 |
| CCG018641.1 | 1901  | 345  | 1411 | 7.79829481 | 25.94746372 | 1.734362925  | Up   | 9.59E-13 | 2.38E-12 | AAEL011750-PA OS=Aedes<br>aegypti GN=AAEL011750 PE=3<br>SV=1                 |
| CCG003443.1 | 1087  | 77   | 1412 | 3.04385425 | 45.41038344 | 3.899051036  | Up   | 0        | 0        | AAEL012855-PA OS=Aedes<br>aegypti GN=AAEL012855 PE=4<br>SV=1                 |
| CCG008978.1 | 1162  | 400  | 1412 | 14.791647  | 42.47942066 | 1.521981387  | Up   | 3.36E-13 | 9.14E-13 | AAEL005528-PA OS=Aedes<br>aegypti GN=AAEL005528 PE=4<br>SV=1                 |
| CCG016513.1 | 2186  | 476  | 1412 | 9.35663023 | 22.58055206 | 1.271019814  | Up   | 4.62E-13 | 1.21E-12 | AAEL013887-PA OS=Aedes<br>aegypti GN=AAEL013887 PE=4<br>SV=1                 |
| CCG023389.1 | 1980  | 200  | 1413 | 4.34037723 | 24.94749751 | 2.523002764  | Up   | 0        | 0        | AAEL005634-PA OS=Aedes<br>aegypti GN=AAEL005634 PE=4<br>SV=1                 |
| CCG002515.1 | 15474 | 431  | 1414 | 1.19684345 | 3.194455432 | 1.41633555   | Up   | 0        | 0        | AAEL005477-PA OS=Aedes<br>aegypti GN=AAEL005477 PE=4<br>SV=1                 |
| CCG022773.2 | 1305  | 5618 | 1415 | 184.983884 | 37.90495144 | -2.286941368 | Down | 0        | 0        | Glutamine synthetase OS=Aedes<br>aegypti GN=AAEL013458 PE=3<br>SV=1          |
| CCG003985.1 | 1518  | 6984 | 1415 | 197.694747 | 32.58627249 | -2.600938302 | Down | 0        | 0        | AAEL005269-PA OS=Aedes<br>aegypti GN=AAEL005269 PE=3<br>SV=1                 |

|             |       |       |      |            |             |              |      |          |          |                                                                                                                  |
|-------------|-------|-------|------|------------|-------------|--------------|------|----------|----------|------------------------------------------------------------------------------------------------------------------|
| CCG009723.1 | 3357  | 58    | 1416 | 0.74240233 | 14.74558234 | 4.311937759  | Up   | 0        | 0        | AAEL007071-FA OS=Aedes aegypti GN=AAEL007071 PE=4 SV=1                                                           |
| CCG014273.1 | 540   | 19808 | 1416 | 1576.19352 | 91.6683702  | -4.103876845 | Down | 0        | 0        | AAEL012207-FA OS=Aedes aegypti GN=AAEL012207 PE=4 SV=1                                                           |
| CCG016236.1 | 945   | 10542 | 1417 | 479.351262 | 52.41891872 | -3.19292373  | Down | 0        | 0        | AAEL004338-FA OS=Aedes aegypti GN=AAEL004338 PE=4 SV=1                                                           |
| CCG008976.1 | 2913  | 357   | 1418 | 5.26611578 | 17.01710829 | 1.692174757  | Up   | 3.04E-13 | 8.39E-13 | AAEL005469-FA OS=Aedes aegypti GN=AAEL005469 PE=4 SV=1                                                           |
| CCG024001.2 | 2713  | 344   | 1419 | 5.44842931 | 18.28448018 | 1.746707323  | Up   | 4.69E-13 | 1.22E-12 | Putative uncharacterized protein OS=Culex quinquefasciatus GN=CpipJ_CPIJ007750 PE=4 SV=1                         |
| CCG019688.1 | 3884  | 370   | 1419 | 4.09340932 | 12.77183181 | 1.641590617  | Up   | 0        | 0        | AAEL005571-FA OS=Aedes aegypti GN=AAEL005571 PE=4 SV=1                                                           |
| CCG010407.1 | 3268  | 400   | 1419 | 5.25945344 | 15.17925176 | 1.529115888  | Up   | 3.36E-13 | 9.14E-13 | AAEL006026-FA OS=Aedes aegypti GN=AAEL006026 PE=4 SV=1                                                           |
| CCG023168.1 | 3366  | 451   | 1419 | 5.75738274 | 14.73731276 | 1.355988455  | Up   | 1.51E-12 | 3.65E-12 | AAEL009677-FA OS=Aedes aegypti GN=AAEL009677 PE=4 SV=1                                                           |
| CCG001650.3 | 33355 | 6975  | 1419 | 8.98557634 | 1.487207158 | -2.595005424 | Down | 0        | 0        | AAEL007874-FA OS=Aedes aegypti GN=AAEL007874 PE=4 SV=1                                                           |
| CCG011728.1 | 1355  | 469   | 1420 | 14.8729192 | 36.63524208 | 1.300544306  | Up   | 0        | 0        | -                                                                                                                |
| CCG002126.1 | 1921  | 524   | 1420 | 11.721052  | 25.84109996 | 1.140565417  | Up   | 0        | 0        | AAEL014698-FA OS=Aedes aegypti GN=AAEL014698 PE=4 SV=1                                                           |
| CCG019419.1 | 1080  | 79    | 1421 | 3.14315651 | 45.99602898 | 3.871223295  | Up   | 0        | 0        | PKP36 pre-miRNA processing factor 38 domain containing B OS=Culex quinquefasciatus GN=CpipJ_CPIJ004500 PE=4 SV=1 |
| CCG022358.1 | 621   | 82    | 1421 | 5.67394241 | 79.99309387 | 3.817452038  | Up   | 0        | 0        | AAEL001495-FA OS=Aedes aegypti GN=AAEL001495 PE=4 SV=1                                                           |
| CCG022557.1 | 1559  | 109   | 1421 | 3.00429831 | 31.86383021 | 3.406819718  | Up   | 0        | 0        | AAEL003984-FA OS=Aedes aegypti GN=AAEL003984 PE=4 SV=1                                                           |
| CCG006948.1 | 726   | 189   | 1421 | 11.1863359 | 68.42384476 | 2.612761619  | Up   | 2.34E-13 | 6.64E-13 | AAEL006748-FA OS=Aedes aegypti GN=AAEL006748 PE=4 SV=1                                                           |
| CCG015210.1 | 689   | 513   | 1421 | 31.9934308 | 72.09827474 | 1.172189027  | Up   | 0        | 0        | AAEL008692-FA OS=Aedes aegypti GN=AAEL008692 PE=4 SV=1                                                           |



|             |       |       |      |            |             |              |      |           |           |                                                                      |
|-------------|-------|-------|------|------------|-------------|--------------|------|-----------|-----------|----------------------------------------------------------------------|
| CCG014407.1 | 4774  | 3635  | 1421 | 32.7178436 | 10.40546948 | -1.652735606 | Down | 0         | 0         | AAEL005458-PA OS=Aedes aegypti GN=AAEL005458 PE=3 SV=1               |
| CCG021273.1 | 37980 | 4898  | 1421 | 5.54148921 | 1.307943952 | -2.082973016 | Down | 0         | 0         | AAEL011520-PA OS=Aedes aegypti GN=AAEL011520 PE=4 SV=1               |
| CCG023517.1 | 705   | 4906  | 1421 | 299.020593 | 70.46200183 | -2.085327475 | Down | 0         | 0         | Hypothetical conserved protein OS=Aedes aegypti PE=2 SV=1            |
| CCG003056.1 | 1701  | 502   | 1422 | 12.6812503 | 29.22437952 | 1.204475399  | Up   | 6.14E-13  | 1.57E-12  | AAEL000448-PA OS=Aedes aegypti GN=AAEL000448 PE=4 SV=1               |
| CCG009951.1 | 8403  | 268   | 1423 | 1.37044971 | 5.919984273 | 2.11094396   | Up   | 0         | 0         | AAEL000065-PA OS=Aedes aegypti GN=AAEL000065 PE=4 SV=1               |
| CCG025974.1 | 1044  | 329   | 1423 | 13.5412286 | 47.64906882 | 1.815089377  | Up   | 0         | 0         | AAEL013609-PA (Fragment) OS=Aedes aegypti GN=AAEL013609 PE=4 SV=1    |
| CCG008020.1 | 1245  | 7120  | 1423 | 245.738563 | 39.95632759 | -2.620628376 | Down | 0         | 0         | Uncharacterized protein OS=Anopheles darlingi GN=AND_05645 PE=4 SV=1 |
| CCG002702.1 | 4015  | 11386 | 1423 | 121.856388 | 12.38994467 | -3.297940234 | Down | 0         | 0         | AAEL009510-PA OS=Aedes aegypti GN=AAEL009510 PE=2 SV=1               |
| CCG003435.1 | 1126  | 5     | 1424 | 0.19080699 | 44.21011201 | 7.85611854   | Up   | 1.59E-05  | 2.76E-05  | AAEL013721-PA OS=Aedes aegypti GN=AAEL013721 PE=4 SV=1               |
| CCG028046.1 | 6406  | 213   | 1425 | 1.42874703 | 7.776388448 | 2.444349788  | Up   | 3.57E-13  | 9.60E-13  | AAEL004064-PA OS=Aedes aegypti GN=AAEL004064 PE=4 SV=1               |
| CCG004912.1 | 2783  | 129   | 1426 | 1.99176995 | 17.91250545 | 3.168844215  | Up   | 0         | 0         | AAEL005152-PA OS=Aedes aegypti GN=AAEL005152 PE=4 SV=1               |
| CCG008431.1 | 11109 | 2564  | 1426 | 9.9175803  | 4.487397847 | -1.144109076 | Down | 7.28E-134 | 4.06E-133 | AAEL008773-PA OS=Aedes aegypti GN=AAEL008773 PE=4 SV=1               |
| CCG010176.1 | 945   | 321   | 1427 | 14.5960686 | 52.78884757 | 1.854653336  | Up   | 0         | 0         | AAEL006460-PA OS=Aedes aegypti GN=AAEL006460 PE=4 SV=1               |
| CCG028088.1 | 1342  | 146   | 1428 | 4.67479974 | 37.19852402 | 2.992268909  | Up   | 9.33E-15  | 3.34E-14  | AAEL005904-PA OS=Aedes aegypti GN=AAEL005904 PE=4 SV=1               |
| CCG015823.1 | 3426  | 146   | 1429 | 1.83116791 | 14.58125438 | 2.993278846  | Up   | 9.33E-15  | 3.34E-14  | AAEL010905-PA OS=Aedes aegypti GN=AAEL010905 PE=4 SV=1               |
| CCG017184.1 | 2491  | 246   | 1429 | 4.24349848 | 20.05434665 | 2.2405889    | Up   | 2.51E-13  | 7.05E-13  | AAEL013597-PA OS=Aedes aegypti GN=AAEL013597 PE=4 SV=1               |

|             |      |     |      |            |             |             |    |          |          |                                                                                    |
|-------------|------|-----|------|------------|-------------|-------------|----|----------|----------|------------------------------------------------------------------------------------|
| CCG013020.1 | 1875 | 184 | 1430 | 4.21676329 | 26.66151242 | 2.660550679 | Up | 3.33E-13 | 9.08E-13 | AAEL010648-PA OS=Aedes aegypti GN=AAEL010648 PE=4 SV=1                             |
| CCG005696.1 | 3540 | 219 | 1430 | 2.65829714 | 14.12156378 | 2.409325576 | Up | 4.32E-13 | 1.14E-12 | AAEL010568-PA OS=Aedes aegypti GN=AAEL010568 PE=3 SV=1                             |
| CCG012557.1 | 1257 | 379 | 1430 | 12.9558707 | 39.7695591  | 1.618058597 | Up | 1.40E-13 | 4.20E-13 | mRNA cap guanine-N7 methyltransferase OS=Aedes aegypti GN=AAEL011698 PE=3 SV=1     |
| CCG003329.1 | 2571 | 258 | 1431 | 4.31201538 | 19.45752394 | 2.173893905 | Up | 1.69E-13 | 4.97E-13 | AAEL002260-PA (Fragment) OS=Aedes aegypti GN=AAEL002260 PE=4 SV=1                  |
| CCG017627.1 | 1928 | 305 | 1431 | 6.79759806 | 25.94672928 | 1.932455728 | Up | 5.30E-13 | 1.37E-12 | Cation-transporting ATPase OS=Culex quinquefasciatus GN=CpipJ_CPIJ006431 PE=4 SV=1 |
| CCG028458.1 | 4953 | 427 | 1431 | 3.70443704 | 10.0999988  | 1.447028901 | Up | 9.31E-13 | 2.31E-12 | AAEL010443-PA OS=Aedes aegypti GN=AAEL010443 PE=4 SV=1                             |
| CCG019327.1 | 2640 | 288 | 1433 | 4.68760741 | 18.97545857 | 2.017211097 | Up | 0        | 0        | AAEL007141-PA OS=Aedes aegypti GN=AAEL007141 PE=4 SV=1                             |
| CCG004956.1 | 1469 | 87  | 1434 | 2.54483792 | 34.12537025 | 3.745199017 | Up | 0        | 0        | AAEL007850-PA OS=Aedes aegypti GN=AAEL007850 PE=4 SV=1                             |
| CCG016218.1 | 1726 | 151 | 1434 | 3.75922939 | 29.0441303  | 2.949737773 | Up | 0        | 0        | AAEL010118-PA OS=Aedes aegypti GN=AAEL010118 PE=4 SV=1                             |
| CCG013475.1 | 1385 | 194 | 1435 | 6.01886535 | 36.22030842 | 2.589235383 | Up | 5.97E-13 | 1.53E-12 | SV=1 OS=Culex quinquefasciatus GN=CpipJ_CPIJ017451 PE=4 SV=1                       |
| CCG025061.1 | 1419 | 288 | 1436 | 8.72113007 | 35.37708629 | 2.020228236 | Up | 0        | 0        | AAEL004422-PA OS=Aedes aegypti GN=AAEL004422 PE=4 SV=1                             |
| CCG011329.1 | 2973 | 290 | 1438 | 4.19146419 | 16.90884696 | 2.012252074 | Up | 1.62E-13 | 4.78E-13 | AAEL005848-PA OS=Aedes aegypti GN=AAEL005848 PE=4 SV=1                             |
| CCG020970.1 | 2022 | 313 | 1438 | 6.65159591 | 24.86152423 | 1.902142317 | Up | 0        | 0        | AGAP001943-PA OS=Anopheles gambiae GN=AgaP_AGAP001943 PE=4 SV=5                    |
| CCG023367.1 | 891  | 513 | 1438 | 24.7401502 | 56.41975533 | 1.189346149 | Up | 0        | 0        | AAEL006964-PA OS=Aedes aegypti GN=AAEL006964 PE=4 SV=1                             |
| CCG023639.1 | 759  | 78  | 1439 | 4.41586205 | 66.27794503 | 3.907761862 | Up | 0        | 0        | AAEL008843-PA OS=Aedes aegypti GN=AAEL008843 PE=4 SV=1                             |

|             |       |     |      |            |             |             |    |          |          |                                                                                          |
|-------------|-------|-----|------|------------|-------------|-------------|----|----------|----------|------------------------------------------------------------------------------------------|
| CCG016045.1 | 1639  | 348 | 1439 | 9.1235312  | 30.69247119 | 1.750220585 | Up | 0        | 0        | AAEL011361-PA OS=Aedes aegypti GN=AAEL011361 PE=4 SV=1                                   |
| CCG011860.1 | 1458  | 228 | 1440 | 6.71954698 | 34.52669311 | 2.361276286 | Up | 1.05E-13 | 3.28E-13 | AAEL008600-PA OS=Aedes aegypti GN=AAEL008600 PE=3 SV=1                                   |
| CCG021949.1 | 6795  | 73  | 1441 | 0.46163217 | 7.41352124  | 4.005343265 | Up | 0        | 0        | DNA polymerase OS=Aedes aegypti GN=AAEL002800 PE=3 SV=1                                  |
| CCG013089.1 | 2000  | 98  | 1441 | 2.105517   | 25.18743841 | 3.58045798  | Up | 0        | 0        | AAEL004317-PA OS=Aedes aegypti GN=AAEL004317 PE=4 SV=1                                   |
| CCG010849.1 | 3633  | 273 | 1441 | 3.2289396  | 13.8659171  | 2.102410683 | Up | 1.53E-14 | 5.42E-14 | AAEL013280-PA OS=Aedes aegypti GN=AAEL013280 PE=4 SV=1                                   |
| CCG012553.1 | 2520  | 102 | 1442 | 1.73925116 | 20.00390282 | 3.523743311 | Up | 0        | 0        | AAEL011693-PA OS=Aedes aegypti GN=AAEL011693 PE=3 SV=1                                   |
| CCG019573.1 | 954   | 575 | 1442 | 25.8989491 | 52.84049801 | 1.028750507 | Up | 1.93E-13 | 5.56E-13 | AAEL001761-PA OS=Aedes aegypti GN=AAEL001761 PE=4 SV=1                                   |
| CCG002083.1 | 1867  | 537 | 1443 | 12.3592649 | 27.0191716  | 1.12839051  | Up | 3.67E-13 | 9.84E-13 | AAEL001339-PA OS=Aedes aegypti GN=AAEL001339 PE=4 SV=1                                   |
| CCG028389.1 | 10083 | 15  | 1445 | 0.06392403 | 5.009888916 | 6.292276386 | Up | 1.48E-08 | 2.92E-08 | AAEL009992-PA OS=Aedes aegypti GN=AAEL009992 PE=4 SV=1                                   |
| CCG013465.1 | 3297  | 381 | 1445 | 4.96556533 | 15.32141642 | 1.625519794 | Up | 0        | 0        | Putative uncharacterized protein OS=Culex quinquefasciatus GN=CpipJ_CPIJ011525 PE=4 SV=1 |
| CCG000070.1 | 2584  | 426 | 1446 | 7.08401972 | 19.5625651  | 1.465455421 | Up | 4.37E-13 | 1.15E-12 | AAEL006236-PA OS=Aedes aegypti GN=AAEL006236 PE=4 SV=1                                   |
| CCG005981.4 | 1269  | 520 | 1446 | 17.6077715 | 39.83425391 | 1.177797228 | Up | 1.17E-12 | 2.86E-12 | AAEL005405-PA OS=Aedes aegypti GN=AAEL005405 PE=4 SV=1                                   |
| CCG020368.1 | 1416  | 267 | 1448 | 8.10234403 | 35.74829433 | 2.141463159 | Up | 5.21E-13 | 1.35E-12 | AAEL010610-PA OS=Aedes aegypti GN=AAEL010610 PE=4 SV=1                                   |
| CCG017768.1 | 4612  | 160 | 1450 | 1.49071065 | 10.9907852  | 2.882222294 | Up | 4.24E-14 | 1.44E-13 | AAEL006211-PA (Fragment) OS=Aedes aegypti GN=AAEL006211 PE=4 SV=1                        |
| CCG016268.2 | 1562  | 280 | 1450 | 7.70264129 | 32.45166538 | 2.074867372 | Up | 0        | 0        | AAEL007136-PA OS=Aedes aegypti GN=AAEL007136 PE=4 SV=1                                   |
| CCG001751.1 | 2006  | 274 | 1451 | 5.8692459  | 25.28637069 | 2.107112925 | Up | 0        | 0        | AAEL002012-PA OS=Aedes aegypti GN=AAEL002012 PE=4 SV=1                                   |

|             |      |      |      |            |             |              |      |          |          |                                                                      |
|-------------|------|------|------|------------|-------------|--------------|------|----------|----------|----------------------------------------------------------------------|
| CCG019260.1 | 2682 | 232  | 1452 | 3.71699419 | 18.92595745 | 2.348157947  | Up   | 2.91E-13 | 8.05E-13 | AAEL009640-PA OS=Aedes aegypti GN=AAEL009640 PE=4 SV=1               |
| CCG010973.1 | 2031 | 236  | 1452 | 4.99303662 | 24.99232785 | 2.323495892  | Up   | 4.60E-13 | 1.20E-12 | Condensin complex subunit 2 OS=Aedes aegypti GN=AAEL005962 PE=3 SV=1 |
| CCG011003.1 | 2927 | 9941 | 1452 | 145.938549 | 17.3417895  | -3.073036328 | Down | 0        | 0        | AGAP001213-PA OS=Anopheles gambiae GN=AgaP_AGAP001213 PE=4 SV=5      |
| CCG019316.1 | 1831 | 413  | 1453 | 9.69224489 | 27.7413305  | 1.51713422   | Up   | 5.88E-13 | 1.51E-12 | AAEL006663-PA OS=Aedes aegypti GN=AAEL006663 PE=4 SV=1               |
| CCG028333.1 | 1236 | 272  | 1454 | 9.45612283 | 41.12405698 | 2.120661916  | Up   | 5.36E-13 | 1.38E-12 | AAEL000091-PA OS=Aedes aegypti GN=AAEL000091 PE=4 SV=1               |
| CCG010022.1 | 2298 | 178  | 1455 | 3.32837805 | 22.13415696 | 2.733383211  | Up   | 1.15E-13 | 3.58E-13 | AAEL012263-PA (Fragment) OS=Aedes aegypti GN=AAEL012263 PE=4 SV=1    |
| CCG011952.1 | 1347 | 106  | 1456 | 3.3814342  | 37.78712025 | 3.482187389  | Up   | 0        | 0        | AAEL004699-PA OS=Aedes aegypti GN=AAEL004699 PE=4 SV=1               |
| CCG003119.1 | 1527 | 462  | 1456 | 13.0006663 | 33.33284282 | 1.358358803  | Up   | 0        | 0        | AAEL003001-PA OS=Aedes aegypti GN=AAEL003001 PE=4 SV=1               |
| CCG025473.1 | 3184 | 312  | 1458 | 4.21060214 | 16.00790438 | 1.926685989  | Up   | 9.28E-14 | 2.93E-13 | AAEL004237-PA OS=Aedes aegypti GN=AAEL004237 PE=4 SV=1               |
| CCG007822.1 | 1734 | 82   | 1459 | 2.03201744 | 29.41414407 | 3.855525367  | Up   | 0        | 0        | AAEL008535-PA OS=Aedes aegypti GN=AAEL008535 PE=4 SV=1               |
| CCG003095.1 | 609  | 4830 | 1459 | 340.794447 | 83.75061709 | -2.024730102 | Down | 0        | 0        | AAEL000138-PA OS=Aedes aegypti GN=AAEL000138 PE=4 SV=1               |
| CCG015308.1 | 1630 | 385  | 1460 | 10.1492931 | 31.31232153 | 1.625351222  | Up   | 7.93E-13 | 1.99E-12 | AAEL012346-PA OS=Aedes aegypti GN=AAEL012348 PE=4 SV=1               |
| CCG019545.1 | 1824 | 401  | 1460 | 9.44674538 | 27.981954   | 1.566607431  | Up   | 1.05E-13 | 3.28E-13 | AAEL005037-PA OS=Aedes aegypti GN=AAEL005037 PE=3 SV=1               |
| CCG005427.1 | 1815 | 408  | 1460 | 9.65931224 | 28.12070749 | 1.541640516  | Up   | 1.01E-12 | 2.49E-12 | AAEL000088-PA OS=Aedes aegypti GN=AAEL000088 PE=4 SV=1               |
| CCG008924.1 | 996  | 472  | 1460 | 20.3631674 | 51.24406033 | 1.331422808  | Up   | 0        | 0        | AAEL000574-PA OS=Aedes aegypti GN=AAEL000574 PE=4 SV=1               |
| CCG024422.1 | 1981 | 449  | 1461 | 9.73922809 | 25.7819497  | 1.404482032  | Up   | 1.06E-12 | 2.60E-12 | AAEL003526-PA OS=Aedes aegypti GN=AAEL003528 PE=4 SV=1               |

|             |      |      |      |            |             |              |      |           |           |                                                                                          |
|-------------|------|------|------|------------|-------------|--------------|------|-----------|-----------|------------------------------------------------------------------------------------------|
| CCG018632.1 | 771  | 9    | 1462 | 0.50159223 | 66.28923559 | 7.046115798  | Up   | 1.09E-06  | 2.01E-06  | AAEL008678-PA OS=Aedes aegypti GN=AAEL008678 PE=4 SV=1                                   |
| CCG011419.1 | 1202 | 355  | 1462 | 12.6907286 | 42.51996726 | 1.744365585  | Up   | 2.28E-13  | 6.52E-13  | AAEL010514-PA OS=Aedes aegypti GN=AAEL010514 PE=4 SV=1                                   |
| CCG028315.1 | 1350 | 3220 | 1462 | 102.490774 | 37.85851899 | -1.436804173 | Down | 8.54E-239 | 5.23E-238 | AAEL005699-PA OS=Aedes aegypti GN=AAEL005699 PE=4 SV=1                                   |
| CCG002370.1 | 3585 | 301  | 1463 | 3.60777967 | 14.26609733 | 1.983407581  | Up   | 0         | 0         | AAEL003327-PA OS=Aedes aegypti GN=AAEL003327 PE=4 SV=1                                   |
| CCG005171.1 | 2538 | 243  | 1464 | 4.11412353 | 20.165058   | 2.293200538  | Up   | 1.53E-14  | 5.41E-14  | AAEL009285-PA OS=Aedes aegypti GN=AAEL009285 PE=3 SV=1                                   |
| CCG025892.1 | 2354 | 209  | 1465 | 3.8150699  | 21.75610683 | 2.511639021  | Up   | 0         | 0         | AAEL010641-PA OS=Aedes aegypti GN=AAEL010641 PE=4 SV=1                                   |
| CCG010746.1 | 1041 | 67   | 1466 | 2.7655833  | 49.23038785 | 4.153893401  | Up   | 0         | 0         | Putative uncharacterized protein OS=Culex quinquefasciatus GN=CpipJ_CPIJ011214 PE=4 SV=1 |
| CCG014394.1 | 3143 | 237  | 1466 | 3.24016134 | 16.30570593 | 2.331239343  | Up   | 2.32E-13  | 6.61E-13  | AAEL005837-PA OS=Aedes aegypti GN=AAEL005837 PE=4 SV=1                                   |
| CCG006528.1 | 928  | 437  | 1466 | 20.2346703 | 55.22503637 | 1.448493122  | Up   | 5.07E-13  | 1.31E-12  | -                                                                                        |
| CCG001206.1 | 2830 | 138  | 1467 | 2.09534395 | 18.12148128 | 3.112441903  | Up   | 1.49E-13  | 4.45E-13  | -                                                                                        |
| CCG006952.1 | 2592 | 80   | 1469 | 1.32622638 | 19.81238757 | 3.901003789  | Up   | 0         | 0         | AAEL003070-PA OS=Aedes aegypti GN=AAEL003070 PE=4 SV=1                                   |
| CCG020164.1 | 6389 | 493  | 1470 | 3.31571125 | 8.043303624 | 1.278469807  | Up   | 6.97E-14  | 2.28E-13  | Putative uncharacterized protein OS=Culex quinquefasciatus GN=CpipJ_CPIJ001092 PE=4 SV=1 |
| CCG026217.1 | 1855 | 169  | 1471 | 3.91476288 | 27.7216308  | 2.824015299  | Up   | 0         | 0         | AAEL002249-PA OS=Aedes aegypti GN=AAEL002249 PE=4 SV=1                                   |
| CCG010899.1 | 1830 | 385  | 1471 | 9.04008078 | 28.1003416  | 1.636180099  | Up   | 7.93E-13  | 1.99E-12  | Uncharacterized protein OS=Anopheles darlingi GN=AND_10453 PE=4 SV=1                     |
| CCG012755.1 | 4449 | 164  | 1472 | 1.58395965 | 11.56632578 | 2.868323155  | Up   | 1.14E-13  | 3.54E-13  | AAEL009871-PA OS=Aedes aegypti GN=AAEL009871 PE=4 SV=1                                   |
| CCG020872.1 | 519  | 191  | 1472 | 15.8135247 | 99.14948634 | 2.648446332  | Up   | 6.68E-14  | 2.19E-13  | AAEL000173-PA OS=Aedes aegypti GN=AAEL000173 PE=4 SV=1                                   |
| CCG023241.1 | 3027 | 105  | 1473 | 1.49052598 | 17.01141119 | 3.512609401  | Up   | 0         | 0         | AAEL007630-PA OS=Aedes aegypti GN=AAEL007630 PE=4 SV=1                                   |

|             |      |      |      |            |             |              |      |           |            |                                                                   |
|-------------|------|------|------|------------|-------------|--------------|------|-----------|------------|-------------------------------------------------------------------|
| CCG019599.1 | 2463 | 165  | 1473 | 2.87860585 | 20.90683787 | 2.860532705  | Up   | 1.31E-14  | 4.66E-14   | AAEL007353-PA OS=Aedes aegypti GN=AAEL007353 PE=3 SV=1            |
| CCG011533.1 | 1881 | 190  | 1474 | 4.34037723 | 27.39420519 | 2.657978405  | Up   | 2.69E-13  | 7.52E-13   | AAEL010885-PA OS=Aedes aegypti GN=AAEL010885 PE=4 SV=1            |
| CCG022619.2 | 2936 | 308  | 1474 | 4.5077242  | 17.55057901 | 1.961047472  | Up   | 0         | 0          | AAEL005821-PA OS=Aedes aegypti GN=AAEL005821 PE=4 SV=1            |
| CCG018175.1 | 2782 | 3192 | 1474 | 49.3024417 | 18.52210638 | -1.412410923 | Down | 1.08E-230 | 6.59E-230  | AAEL007197-PA OS=Aedes aegypti GN=AAEL007197 PE=4 SV=1            |
| CCG006490.1 | 255  | 3971 | 1475 | 669.148299 | 202.2096402 | -1.726474203 | Down | 0         | 0          | AAEL008802-PA OS=Aedes aegypti GN=AAEL008802 PE=4 SV=1            |
| CCG021535.1 | 1296 | 2    | 1476 | 0.06631132 | 39.81359299 | 9.22979021   | Up   | 9.36E-05  | 0.00015406 | AAEL002586-PA OS=Aedes aegypti GN=AAEL002586 PE=4 SV=1            |
| CCG027496.1 | 2077 | 165  | 1476 | 3.41358027 | 24.84276192 | 2.863467996  | Up   | 1.31E-14  | 4.67E-14   | AAEL002115-PA OS=Aedes aegypti GN=AAEL002115 PE=4 SV=1            |
| CCG000806.1 | 2773 | 166  | 1476 | 2.57229569 | 18.60743473 | 2.854750779  | Up   | 1.83E-13  | 5.32E-13   | AAEL010007-PA OS=Aedes aegypti GN=AAEL010007 PE=4 SV=1            |
| CCG019462.1 | 3881 | 200  | 1476 | 2.21436406 | 13.29513438 | 2.58593402   | Up   | 0         | 0          | AAEL002918-PA OS=Aedes aegypti GN=AAEL002918 PE=4 SV=1            |
| CCG008488.1 | 975  | 480  | 1476 | 21.1543309 | 52.92145284 | 1.322899614  | Up   | 5.41E-13  | 1.39E-12   | AAEL004445-PA OS=Aedes aegypti GN=AAEL004445 PE=4 SV=1            |
| CCG026738.1 | 2472 | 3974 | 1476 | 69.0783679 | 20.87314584 | -1.726585947 | Down | 0         | 0          | AAEL006323-PA OS=Aedes aegypti GN=AAEL006323 PE=4 SV=1            |
| CCG019198.1 | 1489 | 80   | 1477 | 2.30864927 | 34.67654452 | 3.90883922   | Up   | 0         | 0          | AAEL007757-PA OS=Aedes aegypti GN=AAEL007757 PE=4 SV=1            |
| CCG027286.1 | 1540 | 141  | 1477 | 3.93424194 | 33.52816545 | 3.091215962  | Up   | 0         | 0          | AAEL001001-PA OS=Aedes aegypti GN=AAEL001001 PE=4 SV=1            |
| CCG019328.1 | 4008 | 166  | 1477 | 1.77968462 | 12.88257854 | 2.855727883  | Up   | 1.83E-13  | 5.32E-13   | AAEL007137-PA (Fragment) OS=Aedes aegypti GN=AAEL007137 PE=4 SV=1 |
| CCG022165.1 | 824  | 113  | 1478 | 5.89269419 | 62.70428771 | 3.411564796  | Up   | 1.42E-13  | 4.26E-13   | -                                                                 |
| CCG020326.1 | 1485 | 457  | 1479 | 13.2236826 | 34.81703121 | 1.396669186  | Up   | 1.13E-12  | 2.77E-12   | AAEL009339-PA (Fragment) OS=Aedes aegypti GN=AAEL009339 PE=3 SV=1 |
| CCG022701.1 | 1656 | 67   | 1480 | 1.73850979 | 31.24290436 | 4.167605474  | Up   | 0         | 0          | AAEL010782-PA OS=Aedes aegypti GN=AAEL010782 PE=3 SV=1            |

|             |       |       |      |            |             |              |      |           |            |                                                                                                   |
|-------------|-------|-------|------|------------|-------------|--------------|------|-----------|------------|---------------------------------------------------------------------------------------------------|
| CCG010967.1 | 3030  | 267   | 1480 | 3.78644196 | 17.07532991 | 2.172998733  | Up   | 5.21E-13  | 1.35E-12   | Putative uncharacterized protein<br>OS=Culex quinquefasciatus<br>GN=CpipJ_CPIJ000710 PE=4<br>SV=1 |
| CCG000393.1 | 2796  | 391   | 1480 | 6.0090008  | 18.50438112 | 1.622669867  | Up   | 9.02E-13  | 2.25E-12   | AAEL010387-PA OS=Aedes<br>aegypti GN=AAEL010387 PE=4<br>SV=1                                      |
| CCG004884.2 | 1785  | 404   | 1481 | 9.7253629  | 29.00459826 | 1.576457646  | Up   | 1.18E-13  | 3.65E-13   | AAEL001398-PA (Fragment)<br>OS=Aedes aegypti<br>GN=AAEL001398 PE=4 SV=1                           |
| CCG007162.1 | 1932  | 2560  | 1481 | 56.9371225 | 26.79772666 | -1.087258966 | Down | 3.50E-123 | 1.93E-122  | -                                                                                                 |
| CCG022070.1 | 3108  | 426   | 1482 | 5.88967405 | 16.66929414 | 1.500933316  | Up   | 4.37E-13  | 1.15E-12   | AAEL004911-PA OS=Aedes<br>aegypti GN=AAEL004911 PE=4<br>SV=1                                      |
| CCG012164.1 | 2690  | 537   | 1482 | 8.57797304 | 19.25954133 | 1.166864658  | Up   | 3.67E-13  | 9.84E-13   | AAEL014507-PA OS=Aedes<br>aegypti GN=AAEL014507 PE=4<br>SV=1                                      |
| CCG014595.2 | 3582  | 225   | 1484 | 2.69910393 | 14.4829935  | 2.423807389  | Up   | 0         | 0          | AAEL001651-PA OS=Aedes<br>aegypti GN=AAEL001651 PE=4<br>SV=1                                      |
| CCG023780.2 | 592   | 260   | 1484 | 18.8718429 | 87.6318965  | 2.215220767  | Up   | 3.22E-13  | 8.81E-13   | AAEL001642-PA OS=Aedes<br>aegypti GN=AAEL001642 PE=4<br>SV=1                                      |
| CCG014466.1 | 1603  | 496   | 1484 | 13.2956883 | 32.36312085 | 1.28339227   | Up   | 6.79E-13  | 1.71E-12   | AAEL000858-PA OS=Aedes<br>aegypti GN=AAEL000858 PE=4<br>SV=1                                      |
| CCG028508.1 | 1575  | 320   | 1485 | 8.73035878 | 32.96066096 | 1.916632325  | Up   | 0         | 0          | AAEL010960-PA OS=Aedes<br>aegypti GN=AAEL010960 PE=3<br>SV=1                                      |
| CCG000866.1 | 11174 | 456   | 1486 | 1.7535528  | 4.649006558 | 1.40664159   | Up   | 1.37E-12  | 3.31E-12   | AAEL013487-PA OS=Aedes<br>aegypti GN=AAEL013487 PE=4<br>SV=1                                      |
| CCG018105.1 | 900   | 2     | 1487 | 0.0954883  | 57.75884173 | 9.240502136  | Up   | 9.36E-05  | 0.00015336 | Putative uncharacterized protein<br>OS=Culex quinquefasciatus<br>GN=CpipJ_CPIJ015628 PE=4<br>SV=1 |
| CCG006972.1 | 1725  | 354   | 1487 | 8.81813684 | 30.13504786 | 1.772896586  | Up   | 0         | 0          | AAEL010668-PA OS=Aedes<br>aegypti GN=AAEL010668 PE=4<br>SV=1                                      |
| CCG000285.1 | 801   | 24032 | 1487 | 1289.19933 | 64.89757498 | -4.312166962 | Down | 0         | 0          | AAEL011795-PA OS=Aedes<br>aegypti GN=AAEL011795 PE=4<br>SV=1                                      |
| CCG009842.1 | 3469  | 440   | 1489 | 5.45018254 | 15.00515253 | 1.461081529  | Up   | 0         | 0          | AAEL010502-PA OS=Aedes<br>aegypti GN=AAEL010502 PE=4<br>SV=1                                      |
| CCG010702.1 | 1797  | 475   | 1489 | 11.3581658 | 28.96654096 | 1.350657539  | Up   | 6.44E-13  | 1.64E-12   | Ultraspiracle OS=Aedes albopictus<br>GN=USP PE=2 SV=1                                             |

|             |      |      |      |            |             |              |      |           |           |                                                                                                |
|-------------|------|------|------|------------|-------------|--------------|------|-----------|-----------|------------------------------------------------------------------------------------------------|
| CCG005150.1 | 3450 | 370  | 1490 | 4.60834835 | 15.09792243 | 1.712028359  | Up   | 0         | 0         | AAEL009668-PA OS=Aedes aegypti GN=AAEL009668 PE=4 SV=1                                         |
| CCG010891.1 | 3381 | 573  | 1491 | 7.28235964 | 15.41638292 | 1.081986417  | Up   | 5.68E-13  | 1.46E-12  | AAEL001473-PA OS=Aedes aegypti GN=AAEL001473 PE=4 SV=1                                         |
| CCG018250.1 | 3924 | 102  | 1492 | 1.11695029 | 13.29198495 | 3.572919682  | Up   | 0         | 0         | AGAP004751-PA OS=Anopheles gambiae GN=AGAP004751 PE=4 SV=4                                     |
| CCG009982.1 | 2091 | 199  | 1492 | 4.08941998 | 24.94392585 | 2.608720404  | Up   | 0         | 0         | AAEL001173-PA OS=Aedes aegypti GN=AAEL001173 PE=4 SV=1                                         |
| CCG002464.1 | 4670 | 291  | 1492 | 2.67755734 | 11.16868286 | 2.060469681  | Up   | 6.00E-14  | 2.00E-13  | DNA topoisomerase z-binding protein 1 OS=Culex quinquefasciatus GN=CpipJ_CPIJ010004 PE=4 SV=1  |
| CCG000072.1 | 2104 | 330  | 1493 | 6.73954963 | 24.80641978 | 1.87998944   | Up   | 1.76E-13  | 5.16E-13  | P/CAF gamma constitutive coactivator 1 OS=Culex quinquefasciatus GN=CpipJ_CPIJ005420 PE=4 SV=1 |
| CCG019707.1 | 1887 | 488  | 1493 | 11.1124698 | 27.65909233 | 1.315574316  | Up   | 9.43E-13  | 2.34E-12  | AAEL006589-PA OS=Aedes aegypti GN=AAEL006589 PE=4 SV=1                                         |
| CCG015232.1 | 3030 | 519  | 1493 | 7.36016246 | 17.22531591 | 1.226720926  | Up   | 0         | 0         | AAEL009264-PA OS=Aedes aegypti GN=AAEL009264 PE=4 SV=1                                         |
| CCG012022.1 | 1422 | 4768 | 1493 | 144.078548 | 36.70373222 | -1.972856867 | Down | 0         | 0         | AAEL001209-PA OS=Aedes aegypti GN=AAEL001209 PE=4 SV=1                                         |
| CCG013009.1 | 2298 | 509  | 1494 | 9.51766533 | 22.72744365 | 1.255755791  | Up   | 0         | 0         | AAEL006309-PA OS=Aedes aegypti GN=AAEL006309 PE=4 SV=1                                         |
| CCG009924.1 | 4495 | 2690 | 1494 | 25.7149246 | 11.61905795 | -1.146112821 | Down | 9.76E-141 | 5.49E-140 | AAEL003267-PA (Fragment) OS=Aedes aegypti GN=AAEL003267 PE=4 SV=2                              |
| CCG008960.1 | 948  | 46   | 1496 | 2.08502932 | 55.16622579 | 4.725645708  | Up   | 3.40E-14  | 1.18E-13  | AAEL009330-PA OS=Aedes aegypti GN=AAEL009330 PE=4 SV=1                                         |
| CCG018617.1 | 6055 | 303  | 1496 | 2.15026087 | 8.637090347 | 2.00603368   | Up   | 1.37E-13  | 4.14E-13  | DNA-directed RNA polymerase OS=Anopheles gambiae GN=AGAP004703 PE=3 SV=4                       |
| CCG005655.1 | 2199 | 43   | 1497 | 0.84024492 | 23.79833576 | 4.823906955  | Up   | 8.46E-14  | 2.70E-13  | AAEL001357-PA OS=Aedes aegypti GN=AAEL001357 PE=4 SV=1                                         |



|             |      |     |      |            |             |             |    |          |          |                                                                        |
|-------------|------|-----|------|------------|-------------|-------------|----|----------|----------|------------------------------------------------------------------------|
| CCG007714.1 | 2190 | 217 | 1497 | 4.25773169 | 23.89613714 | 2.488620477 | Up | 1.47E-13 | 4.37E-13 | AAEL013357-PA OS=Aedes aegypti GN=AAEL013357 PE=4 SV=1                 |
| CCG028365.1 | 1059 | 296 | 1498 | 12.0104263 | 49.44995147 | 2.041681747 | Up | 2.26E-13 | 6.47E-13 | AAEL008942-PA OS=Aedes aegypti GN=AAEL008942 PE=4 SV=1                 |
| CCG004038.1 | 1313 | 314 | 1499 | 10.2760828 | 39.91047744 | 1.957477123 | Up | 4.97E-14 | 1.68E-13 | AAEL001371-PA OS=Aedes aegypti GN=AAEL001371 PE=4 SV=1                 |
| CCG016820.1 | 2361 | 278 | 1500 | 5.0595452  | 22.20983277 | 2.134118916 | Up | 2.11E-14 | 7.39E-14 | AGAP001943-PA OS=Anopheles gambiae GN=AgaP_AGAP001943 PE=4 SV=5        |
| CCG022929.1 | 3690 | 209 | 1503 | 2.43378714 | 14.23910298 | 2.548583366 | Up | 0        | 0        | Tyrosine-protein kinase receptor OS=Anopheles gambiae GN=INR PE=3 SV=3 |
| CCG006561.1 | 1718 | 234 | 1503 | 5.85268795 | 30.58340512 | 2.385577778 | Up | 4.60E-13 | 1.20E-12 | AAEL000142-PA (Fragment) OS=Aedes aegypti GN=AAEL000142 PE=4 SV=1      |
| CCG005168.1 | 1275 | 581 | 1503 | 19.5807183 | 41.20963921 | 1.073548144 | Up | 0        | 0        | AGAP011626-PA OS=Anopheles gambiae GN=AGAP011626 PE=4 SV=4             |
| CCG009431.1 | 1017 | 348 | 1505 | 14.703508  | 51.7327498  | 1.81491748  | Up | 0        | 0        | -                                                                      |
| CCG024661.1 | 2507 | 521 | 1505 | 8.929889   | 20.98612148 | 1.232721413 | Up | 0        | 0        | AAEL009877-PA (Fragment) OS=Aedes aegypti GN=AAEL009877 PE=4 SV=1      |
| CCG026363.1 | 2958 | 120 | 1506 | 1.7431941  | 17.79823016 | 3.351928663 | Up | 0        | 0        | AAEL009529-PA OS=Aedes aegypti GN=AAEL009529 PE=4 SV=1                 |
| CCG006599.1 | 4065 | 188 | 1506 | 1.98728416 | 12.95133206 | 2.704230407 | Up | 1.80E-13 | 5.25E-13 | AAEL008324-PA OS=Aedes aegypti GN=AAEL008324 PE=4 SV=1                 |
| CCG016980.1 | 1642 | 549 | 1507 | 14.3668601 | 32.08411882 | 1.159114566 | Up | 2.32E-13 | 6.62E-13 | AAEL010791-PA OS=Aedes aegypti GN=AAEL010791 PE=4 SV=1                 |
| CCG026193.1 | 2397 | 125 | 1508 | 2.24080802 | 21.99294175 | 3.294949632 | Up | 2.35E-14 | 8.22E-14 | AAEL014106-PA OS=Aedes aegypti GN=AAEL014106 PE=4 SV=1                 |
| CCG020759.1 | 2286 | 287 | 1508 | 5.39471296 | 23.0608405  | 2.09582699  | Up | 2.87E-13 | 7.98E-13 | AAEL013905-PB (Fragment) OS=Aedes aegypti GN=AAEL013905 PE=4 SV=1      |
| CCG020829.1 | 1725 | 377 | 1508 | 9.39106664 | 30.56062688 | 1.702313204 | Up | 4.66E-13 | 1.21E-12 | AAEL011061-PA OS=Aedes aegypti GN=AAEL011061 PE=4 SV=1                 |

|             |      |      |      |            |             |              |      |           |           |                                                                                                   |
|-------------|------|------|------|------------|-------------|--------------|------|-----------|-----------|---------------------------------------------------------------------------------------------------|
| CCG022755.1 | 894  | 3556 | 1508 | 170.917647 | 58.96765254 | -1.535305692 | Down | 6.64E-291 | 4.16E-290 | AAEL008485-PA OS=Aedes aegypti GN=AAEL008485 PE=4 SV=1                                            |
| CCG019407.1 | 1500 | 142  | 1510 | 4.06780154 | 35.19133195 | 3.112898919  | Up   | 2.62E-13  | 7.34E-13  | AAEL002557-PA OS=Aedes aegypti GN=AAEL002557 PE=4 SV=1                                            |
| CCG009702.1 | 2987 | 311  | 1511 | 4.47391612 | 17.68394918 | 1.982830379  | Up   | 0         | 0         | AAEL010732-PA OS=Aedes aegypti GN=AAEL010732 PE=4 SV=1                                            |
| CCG001264.1 | 4130 | 417  | 1511 | 4.33859064 | 12.7898199  | 1.559697576  | Up   | 0         | 0         | Connexin43-interacting protein of 150 kDa OS=Culex quinquefasciatus GN=CpipJ_CPIJ015283 PE=4 SV=1 |
| CCG025605.1 | 1215 | 77   | 1512 | 2.72318483 | 43.50363332 | 3.997769087  | Up   | 0         | 0         | AAEL000294-PA OS=Aedes aegypti GN=AAEL000294 PE=4 SV=1                                            |
| CCG014264.1 | 1857 | 170  | 1512 | 3.93368599 | 28.463605   | 2.855164692  | Up   | 3.53E-13  | 9.53E-13  | AAEL012568-PA OS=Aedes aegypti GN=AAEL012568 PE=4 SV=1                                            |
| CCG002831.1 | 2817 | 558  | 1512 | 8.51157682 | 18.76354792 | 1.140434316  | Up   | 2.34E-13  | 6.64E-13  | AAEL004227-PA (Fragment) OS=Aedes aegypti GN=AAEL004227 PE=4 SV=1                                 |
| CCG025879.1 | 1601 | 10   | 1514 | 0.2683931  | 33.05860777 | 6.944534599  | Up   | 5.43E-07  | 1.01E-06  | AAEL015402-PA OS=Aedes aegypti GN=AAEL015402 PE=4 SV=1                                            |
| CCG012163.1 | 2127 | 232  | 1515 | 4.68687279 | 24.8997599  | 2.409434287  | Up   | 2.91E-13  | 8.06E-13  | AAEL014509-PA OS=Aedes aegypti GN=AAEL014509 PE=4 SV=1                                            |
| CCG026693.1 | 2181 | 272  | 1516 | 5.35890317 | 24.29928821 | 2.180904401  | Up   | 5.36E-13  | 1.38E-12  | AAEL004419-PA OS=Aedes aegypti GN=AAEL004419 PE=4 SV=1                                            |
| CCG011587.1 | 1473 | 54   | 1518 | 1.57526522 | 36.02624857 | 4.515381777  | Up   | 0         | 0         | AAEL002569-PA OS=Aedes aegypti GN=AAEL002569 PE=4 SV=1                                            |
| CCG005481.1 | 2476 | 87   | 1518 | 1.50984124 | 21.43241686 | 3.827325783  | Up   | 0         | 0         | AAEL010595-PA OS=Aedes aegypti GN=AAEL010595 PE=3 SV=1                                            |
| CCG023476.1 | 1464 | 236  | 1518 | 6.92681514 | 36.24772141 | 2.38762623   | Up   | 4.60E-13  | 1.20E-12  | AAEL005628-PA OS=Aedes aegypti GN=AAEL005628 PE=4 SV=1                                            |
| CCG017984.1 | 2753 | 288  | 1520 | 4.49519926 | 19.30133698 | 2.102243811  | Up   | 0         | 0         | AAEL004110-PA OS=Aedes aegypti GN=AAEL004110 PE=4 SV=1                                            |
| CCG026810.1 | 1767 | 521  | 1520 | 12.6696275 | 30.07163593 | 1.24702925   | Up   | 0         | 0         | AAEL012632-PA OS=Aedes aegypti GN=AAEL012632 PE=4 SV=1                                            |
| CCG010847.1 | 2443 | 190  | 1522 | 3.34189504 | 21.77916383 | 2.704210239  | Up   | 2.69E-13  | 7.52E-13  | AAEL012618-PA OS=Aedes aegypti GN=AAEL012618 PE=4 SV=1                                            |

|             |       |      |      |            |             |              |      |           |            |                                                                                          |
|-------------|-------|------|------|------------|-------------|--------------|------|-----------|------------|------------------------------------------------------------------------------------------|
| CCG022759.1 | 5940  | 471  | 1523 | 3.40719613 | 8.963208001 | 1.395430181  | Up   | 0         | 0          | AAEL001977-PA OS=Aedes aegypti GN=AAEL001977 PE=4 SV=1                                   |
| CCG012689.1 | 2992  | 263  | 1524 | 3.77708563 | 17.80628804 | 2.237041402  | Up   | 1.40E-14  | 4.98E-14   | AAEL002238-PA OS=Aedes aegypti GN=AAEL002238 PE=4 SV=1                                   |
| CCG019724.1 | 300   | 4    | 1525 | 0.57292979 | 177.7045736 | 8.276906731  | Up   | 2.95E-05  | 5.04E-05   | -                                                                                        |
| CCG010567.3 | 5802  | 590  | 1526 | 4.36955247 | 9.194472657 | 1.073281306  | Up   | 0         | 0          | AAEL011663-PA OS=Aedes aegypti GN=AAEL011663 PE=4 SV=1                                   |
| CCG016855.3 | 2314  | 182  | 1529 | 3.37964205 | 23.09905151 | 2.772891255  | Up   | 0         | 0          | AAEL014106-PA OS=Aedes aegypti GN=AAEL014106 PE=4 SV=1                                   |
| CCG015862.1 | 2310  | 310  | 1529 | 5.76650118 | 23.13904986 | 2.00456149   | Up   | 2.14E-13  | 6.15E-13   | AAEL007642-PA OS=Aedes aegypti GN=TUBE PE=4 SV=1                                         |
| CCG013024.1 | 7922  | 463  | 1529 | 2.51135914 | 6.747185709 | 1.425817512  | Up   | 6.16E-13  | 1.57E-12   | Putative uncharacterized protein OS=Culex quinquefasciatus GN=CpipJ_CPIJ010714 PE=4 SV=1 |
| CCG013001.1 | 1404  | 3397 | 1529 | 103.965946 | 38.07065896 | -1.449359608 | Down | 3.99E-255 | 2.46E-254  | Uncharacterized protein OS=Anopheles darlingi GN=AND_10266 PE=4 SV=1                     |
| CCG006089.1 | 1143  | 1    | 1531 | 0.03759382 | 46.82512838 | 10.28257177  | Up   | 0.000587  | 0.00091592 | AAEL005938-PA OS=Aedes aegypti GN=AAEL005938 PE=4 SV=1                                   |
| CCG000214.1 | 927   | 115  | 1532 | 5.33065748 | 57.7735491  | 3.438023735  | Up   | 6.13E-14  | 2.03E-13   | AAEL003876-PA OS=Aedes aegypti GN=AAEL003876 PE=4 SV=1                                   |
| CCG024190.2 | 3441  | 419  | 1532 | 5.23229259 | 15.56410346 | 1.572707352  | Up   | 0         | 0          | AAEL001688-PA OS=Aedes aegypti GN=AAEL001688 PE=4 SV=1                                   |
| CCG021651.1 | 13993 | 3269 | 1532 | 10.0384523 | 3.827347961 | -1.391119876 | Down | 8.01E-231 | 4.88E-230  | AAEL013936-PA OS=Aedes aegypti GN=SRPN4 PE=3 SV=2                                        |
| CCG014660.1 | 3160  | 582  | 1533 | 7.91404606 | 16.95918933 | 1.099579843  | Up   | 1.68E-13  | 4.94E-13   | -                                                                                        |
| CCG008406.1 | 1601  | 337  | 1534 | 9.04484732 | 33.49531328 | 1.88879119   | Up   | 0         | 0          | AAEL003768-PA OS=Aedes aegypti GN=AAEL003768 PE=4 SV=1                                   |
| CCG024432.2 | 2394  | 504  | 1535 | 9.04625992 | 22.41476811 | 1.309056221  | Up   | 0         | 0          | Uncharacterized protein OS=Anopheles darlingi GN=AND_12429 PE=3 SV=1                     |
| CCG012084.1 | 2608  | 304  | 1537 | 5.00874207 | 20.60232799 | 2.04028714   | Up   | 0         | 0          | AAEL006016-PA OS=Aedes aegypti GN=AAEL006016 PE=4 SV=1                                   |
| CCG012350.1 | 1143  | 241  | 1539 | 9.06011027 | 47.06980573 | 2.377201384  | Up   | 2.37E-13  | 6.72E-13   | AAEL000459-PA OS=Aedes aegypti GN=AAEL000459 PE=4 SV=1                                   |

|             |      |       |      |            |             |              |      |           |           |                                                                                    |
|-------------|------|-------|------|------------|-------------|--------------|------|-----------|-----------|------------------------------------------------------------------------------------|
| CCG017834.1 | 1278 | 250   | 1539 | 8.40566014 | 42.09764316 | 2.324306435  | Up   | 2.10E-13  | 6.02E-13  | Saccharopine dehydrogenase domain-containing protein<br>OS=Aedes aegypti PE=2 SV=1 |
| CCG015977.1 | 2802 | 181   | 1540 | 2.77570377 | 19.21332842 | 2.791181952  | Up   | 1.53E-13  | 4.55E-13  | AAEL003916-PA OS=Aedes aegypti GN=AAEL003916 PE=4 SV=1                             |
| CCG007580.1 | 822  | 510   | 1542 | 26.6600543 | 65.57866519 | 1.298546817  | Up   | 0         | 0         | AAEL007528-PA OS=Aedes aegypti GN=AAEL007528 PE=4 SV=1                             |
| CCG012283.1 | 1836 | 130   | 1543 | 3.04251934 | 29.37942324 | 3.271467737  | Up   | 0         | 0         | AAEL011201-PA OS=Aedes aegypti GN=AAEL011201 PE=4 SV=1                             |
| CCG025411.1 | 3077 | 571   | 1543 | 7.97390915 | 17.53026359 | 1.136488615  | Up   | 0         | 0         | AAEL013977-PA OS=Aedes aegypti GN=AAEL013977 PE=4 SV=1                             |
| CCG007669.1 | 3756 | 47    | 1544 | 0.5376937  | 14.37049503 | 4.740181389  | Up   | 0         | 0         | Microcephalin OS=Culex quinquefasciatus<br>GN=CpipJ_CPIJ009302 PE=4 SV=1           |
| CCG012153.1 | 1880 | 84    | 1544 | 1.91992431 | 28.71041454 | 3.902452818  | Up   | 0         | 0         | AAEL009775-PA OS=Aedes aegypti GN=AAEL009775 PE=4 SV=1                             |
| CCG016685.1 | 3342 | 244   | 1544 | 3.13722778 | 16.15068203 | 2.364032904  | Up   | 2.78E-13  | 7.73E-13  | AAEL012045-PA (Fragment)<br>OS=Aedes aegypti<br>GN=AAEL012045 PE=4 SV=1            |
| CCG019116.3 | 2592 | 301   | 1544 | 4.98992674 | 20.82391178 | 2.061150564  | Up   | 0         | 0         | AAEL002145-PA OS=Aedes aegypti GN=AAEL002145 PE=4 SV=1                             |
| CCG000089.1 | 742  | 20076 | 1544 | 1162.61508 | 72.74336838 | -3.99841399  | Down | 0         | 0         | AAEL014505-PA OS=Aedes aegypti GN=AAEL014505 PE=2 SV=1                             |
| CCG000612.1 | 741  | 0     | 1545 | 0.001      | 72.88871473 | 16.15340784  | Up   | 4.44E-16  | 1.65E-15  | AAEL001559-PA OS=Aedes aegypti GN=AAEL001559 PE=3 SV=1                             |
| CCG023617.1 | 1371 | 411   | 1545 | 12.8815178 | 39.39499461 | 1.612709743  | Up   | 0         | 0         | AAEL013071-PA OS=Aedes aegypti GN=AAEL013071 PE=4 SV=1                             |
| CCG020467.1 | 1028 | 87    | 1547 | 3.63654369 | 52.60744569 | 3.854627189  | Up   | 0         | 0         | AAEL014250-PA OS=Aedes aegypti GN=AAEL014250 PE=4 SV=1                             |
| CCG003264.1 | 1952 | 3485  | 1547 | 76.7159452 | 27.7051507  | -1.469372255 | Down | 4.03E-267 | 2.50E-266 | -                                                                                  |
| CCG000552.1 | 2182 | 214   | 1548 | 4.21426361 | 24.80083063 | 2.557035974  | Up   | 0         | 0         | AAEL007308-PA (Fragment)<br>OS=Aedes aegypti<br>GN=AAEL007308 PE=4 SV=1            |
| CCG007525.1 | 462  | 547   | 1548 | 50.8754217 | 117.1329274 | 1.203105937  | Up   | 0         | 0         | AAEL007342-PA OS=Aedes aegypti GN=AAEL007342 PE=4 SV=1                             |

|             |       |      |      |            |             |              |      |           |           |                                                                                                                |
|-------------|-------|------|------|------------|-------------|--------------|------|-----------|-----------|----------------------------------------------------------------------------------------------------------------|
| CCG024375.1 | 15493 | 147  | 1549 | 0.40770354 | 3.49515076  | 3.099762288  | Up   | 7.02E-14  | 2.29E-13  | AAEL010986-PA (Fragment)<br>OS=Aedes aegypti<br>GN=AAEL010986 PE=3 SV=1                                        |
| CCG017366.1 | 3171  | 220  | 1549 | 2.98118625 | 17.07674889 | 2.518074919  | Up   | 4.61E-13  | 1.20E-12  | AAEL013086-PA OS=Aedes<br>aegypti GN=AAEL013086 PE=4<br>SV=1                                                   |
| CCG010641.1 | 5580  | 122  | 1550 | 0.93948165 | 9.710632437 | 3.369628366  | Up   | 8.04E-14  | 2.58E-13  | AAEL008377-PA OS=Aedes<br>aegypti GN=AAEL008377 PE=4<br>SV=1                                                   |
| CCG002095.1 | 2633  | 62   | 1551 | 1.01182056 | 20.59258917 | 4.347099864  | Up   | 0         | 0         | AAEL006140-PA OS=Aedes<br>aegypti GN=AAEL006140 PE=3<br>SV=1                                                   |
| CCG027350.1 | 933   | 452  | 1551 | 20.8170633 | 58.11391991 | 1.481117212  | Up   | 1.12E-13  | 3.49E-13  | AAEL003961-PA OS=Aedes<br>aegypti GN=AAEL003961 PE=3<br>SV=1                                                   |
| CCG021482.1 | 1947  | 128  | 1552 | 2.82492349 | 27.86607373 | 3.302226046  | Up   | 4.15E-14  | 1.42E-13  | AAEL013487-PA OS=Aedes<br>aegypti GN=AAEL013487 PE=4<br>SV=1                                                   |
| CCG001014.1 | 2178  | 138  | 1553 | 2.72260026 | 24.92663169 | 3.194630861  | Up   | 1.49E-13  | 4.45E-13  | AAEL004489-PA OS=Aedes<br>aegypti GN=AAEL004489 PE=4<br>SV=1                                                   |
| CCG020084.1 | 3570  | 264  | 1553 | 3.17759382 | 15.20734001 | 2.258761199  | Up   | 0         | 0         | AAEL011147-PA OS=Aedes<br>aegypti GN=AAEL011147 PE=4<br>SV=1                                                   |
| CCG026664.1 | 945   | 72   | 1554 | 3.27388454 | 57.48694403 | 4.134158991  | Up   | 0         | 0         | AAEL010422-PA OS=Aedes<br>aegypti GN=AAEL010422 PE=4<br>SV=1                                                   |
| CCG002959.1 | 3110  | 357  | 1554 | 4.93253867 | 17.46789778 | 1.824303728  | Up   | 3.04E-13  | 8.40E-13  | Putative uncharacterized protein<br>OS=Culex quinquefasciatus<br>GN=CpipJ_CPIJ011015 PE=4<br>SV=1              |
| CCG020742.1 | 1728  | 466  | 1555 | 11.587903  | 31.458403   | 1.440825924  | Up   | 0         | 0         | AAEL000650-PA OS=Aedes<br>aegypti GN=AAEL000650 PE=4<br>SV=1                                                   |
| CCG015245.1 | 2505  | 412  | 1556 | 7.06727771 | 21.71460226 | 1.619439022  | Up   | 3.41E-13  | 9.25E-13  | AAEL002694-PA OS=Aedes<br>aegypti GN=AAEL002694 PE=4<br>SV=2                                                   |
| CCG023719.1 | 2913  | 380  | 1558 | 5.60538934 | 18.69721772 | 1.737937114  | Up   | 0         | 0         | AAEL005469-PA OS=Aedes<br>aegypti GN=AAEL005469 PE=4<br>SV=1                                                   |
| CCG022407.1 | 3086  | 2922 | 1558 | 40.6861842 | 17.64905872 | -1.204947741 | Down | 2.53E-165 | 1.46E-164 | Stranded-chain-amino-acid<br>aminotransferase OS=Culex<br>quinquefasciatus<br>GN=CpipJ_CPIJ015408 PE=3<br>SV=1 |
| CCG003300.2 | 1333  | 332  | 1559 | 10.7021395 | 40.88518641 | 1.933678985  | Up   | 0         | 0         | Semaphorin-like protein kinase 3<br>OS=Culex quinquefasciatus<br>GN=CpipJ_CPIJ000288 PE=4<br>SV=1              |

|             |      |      |      |            |             |              |      |          |          |                                                                                          |
|-------------|------|------|------|------------|-------------|--------------|------|----------|----------|------------------------------------------------------------------------------------------|
| CCG019292.1 | 3366 | 456  | 1559 | 5.82121182 | 16.1913112  | 1.475828402  | Up   | 1.37E-12 | 3.31E-12 | AAEL007487-PA OS=Aedes aegypti GN=AAEL007487 PE=4 SV=1                                   |
| CCG011457.1 | 1242 | 6363 | 1559 | 220.142046 | 43.88079991 | -2.32677299  | Down | 0        | 0        | Putative uncharacterized protein OS=Culex quinquefasciatus GN=CpipJ_CPIJ000118 PE=4 SV=1 |
| CCG014712.1 | 3360 | 393  | 1560 | 5.02592432 | 16.2306285  | 1.691258015  | Up   | 1.08E-13 | 3.37E-13 | AAEL009261-PA OS=Aedes aegypti GN=AAEL009261 PE=4 SV=1                                   |
| CCG020026.1 | 4503 | 524  | 1561 | 5.00025337 | 12.11855875 | 1.277145024  | Up   | 0        | 0        | AAEL004621-PA OS=Aedes aegypti GN=AAEL004621 PE=4 SV=1                                   |
| CCG015908.2 | 1350 | 4230 | 1561 | 134.638502 | 40.42212596 | -1.735873922 | Down | 0        | 0        | AAEL007029-PA OS=Aedes aegypti GN=AAEL007029 PE=4 SV=1                                   |
| CCG021734.1 | 1389 | 636  | 1564 | 19.6751269 | 39.36266729 | 1.000455046  | Up   | 9.12E-13 | 2.27E-12 | AAEL000424-PA OS=Aedes aegypti GN=AAEL000424 PE=3 SV=1                                   |
| CCG023671.2 | 7563 | 8046 | 1564 | 45.7139342 | 7.229240364 | -2.660718022 | Down | 0        | 0        | AAEL002070-PA (Fragment) OS=Aedes aegypti GN=AAEL002070 PE=4 SV=1                        |
| CCG027497.1 | 1718 | 66   | 1565 | 1.65075814 | 31.84499601 | 4.269866026  | Up   | 0        | 0        | AAEL002104-PA OS=Aedes aegypti GN=AAEL002104 PE=4 SV=1                                   |
| CCG005885.1 | 2817 | 4186 | 1565 | 63.8520799 | 19.42126487 | -1.717096451 | Down | 0        | 0        | AAEL012110-PA OS=Aedes aegypti GN=AAEL012110 PE=4 SV=1                                   |
| CCG024581.1 | 1320 | 89   | 1566 | 2.8972018  | 41.47322835 | 3.83944827   | Up   | 0        | 0        | AAEL006279-PA OS=Aedes aegypti GN=AAEL006279 PE=4 SV=1                                   |
| CCG012546.1 | 2226 | 125  | 1566 | 2.41294556 | 24.59328905 | 3.349397416  | Up   | 2.35E-14 | 8.23E-14 | GA19507, isoform A OS=Drosophila pseudoobscura pseudoobscura GN=GA19507 PE=4 SV=1        |
| CCG021745.1 | 1883 | 222  | 1568 | 5.06600164 | 29.11023791 | 2.522607182  | Up   | 0        | 0        | AAEL008112-PA OS=Aedes aegypti GN=AAEL008112 PE=4 SV=1                                   |
| CCG026695.1 | 4517 | 503  | 1568 | 4.78498484 | 12.13517334 | 1.342608458  | Up   | 1.17E-13 | 3.62E-13 | AAEL004431-PA OS=Aedes aegypti GN=AAEL004431 PE=4 SV=1                                   |
| CCG004634.1 | 2892 | 178  | 1569 | 2.64474853 | 18.96595306 | 2.84220941   | Up   | 1.15E-13 | 3.57E-13 | AAEL002098-PA (Fragment) OS=Aedes aegypti GN=AAEL002098 PE=4 SV=1                        |
| CCG005065.1 | 1202 | 208  | 1569 | 7.43569451 | 45.63189372 | 2.617503123  | Up   | 3.93E-13 | 1.05E-12 | AAEL013463-PA OS=Aedes aegypti GN=AAEL013463 PE=4 SV=1                                   |

|             |      |      |      |            |             |              |      |           |           |                                                                                          |
|-------------|------|------|------|------------|-------------|--------------|------|-----------|-----------|------------------------------------------------------------------------------------------|
| CCG022456.1 | 3432 | 252  | 1569 | 3.15512037 | 15.98179961 | 2.340662917  | Up   | 5.42E-14  | 1.81E-13  | Structural maintenance of chromosomes protein OS=Aedes aegypti GN=AAEL001655 PE=3 SV=1   |
| CCG010489.1 | 1428 | 363  | 1569 | 10.9229788 | 38.41003939 | 1.814117103  | Up   | 0         | 0         | AAEL013291-PA OS=Aedes aegypti GN=AAEL013291 PE=4 SV=1                                   |
| CCG007646.1 | 942  | 411  | 1569 | 18.7479415 | 58.22668392 | 1.634948257  | Up   | 0         | 0         | AAEL001264-PA OS=Aedes aegypti GN=AAEL001264 PE=4 SV=1                                   |
| CCG011911.1 | 1061 | 113  | 1570 | 4.57641848 | 51.72902406 | 3.498683085  | Up   | 1.42E-13  | 4.26E-13  | Proliferating cell nuclear antigen OS=Aedes aegypti GN=PCNA PE=2 SV=1                    |
| CCG000471.1 | 5316 | 141  | 1571 | 1.13971644 | 10.33097306 | 3.180229317  | Up   | 0         | 0         | AAEL002319-PA OS=Aedes aegypti GN=AAEL002319 PE=4 SV=1                                   |
| CCG003044.1 | 1846 | 245  | 1571 | 5.70291711 | 29.75051615 | 2.38314273   | Up   | 3.40E-13  | 9.23E-13  | AAEL007211-PA OS=Aedes aegypti GN=AAEL007211 PE=4 SV=1                                   |
| CCG014495.1 | 5502 | 117  | 1572 | 0.91375117 | 9.988079078 | 3.450333986  | Up   | 9.44E-14  | 2.97E-13  | Putative uncharacterized protein OS=Culex quinquefasciatus GN=CpipJ_CPIJ005250 PE=4 SV=1 |
| CCG020280.1 | 4541 | 408  | 1575 | 3.86074691 | 12.12492533 | 1.651023975  | Up   | 1.01E-12  | 2.49E-12  | AAEL008475-PA OS=Aedes aegypti GN=AAEL008475 PE=4 SV=1                                   |
| CCG007917.1 | 1395 | 3250 | 1575 | 100.108701 | 39.46902216 | -1.342774686 | Down | 2.06E-217 | 1.24E-216 | AAEL006866-PA OS=Aedes aegypti GN=AAEL006866 PE=4 SV=1                                   |
| CCG024297.1 | 674  | 9557 | 1576 | 609.290436 | 81.74220207 | -2.89797708  | Down | 0         | 0         | -                                                                                        |
| CCG020286.1 | 1775 | 279  | 1577 | 6.75411603 | 31.05870562 | 2.201158837  | Up   | 0         | 0         | AAEL009618-PA OS=Aedes aegypti GN=AAEL009618 PE=4 SV=1                                   |
| CCG002531.1 | 3431 | 522  | 1577 | 6.53751136 | 16.06796924 | 1.297374152  | Up   | 0         | 0         | AAEL013627-PA OS=Aedes aegypti GN=AAEL013627 PE=4 SV=1                                   |
| CCG011283.1 | 4581 | 3297 | 1577 | 30.9258273 | 12.03431619 | -1.361658023 | Down | 2.67E-225 | 1.62E-224 | AAEL003348-PA OS=Aedes aegypti GN=AAEL003348 PE=4 SV=2                                   |
| CCG013007.1 | 4539 | 359  | 1578 | 3.39857562 | 12.15337315 | 1.83835466   | Up   | 0         | 0         | AAEL006320-PA OS=Aedes aegypti GN=AAEL006320 PE=4 SV=1                                   |
| CCG028391.1 | 1314 | 3481 | 1578 | 113.833825 | 41.98185749 | -1.439091405 | Down | 1.34E-258 | 8.27E-258 | AAEL000044-PB OS=Aedes aegypti GN=AAEL000044 PE=3 SV=1                                   |
| CCG001914.1 | 4968 | 138  | 1581 | 1.19360374 | 11.12500716 | 3.220410399  | Up   | 1.49E-13  | 4.45E-13  | AAEL004377-PA OS=Aedes aegypti GN=AAEL004377 PE=4 SV=1                                   |

|             |      |      |      |            |             |              |      |          |          |                                                                                             |
|-------------|------|------|------|------------|-------------|--------------|------|----------|----------|---------------------------------------------------------------------------------------------|
| CCG012271.1 | 1923 | 194  | 1581 | 4.33496023 | 28.74104814 | 2.729022014  | Up   | 5.97E-13 | 1.53E-12 | AAEL012611-PA OS=Aedes aegypti GN=AAEL012611 PE=4 SV=1                                      |
| CCG005196.2 | 7444 | 290  | 1582 | 1.67399557 | 7.429338239 | 2.149937998  | Up   | 1.62E-13 | 4.78E-13 | AAEL001977-PA OS=Aedes aegypti GN=AAEL001977 PE=4 SV=1                                      |
| CCG009639.1 | 1008 | 373  | 1582 | 15.900507  | 54.86507327 | 1.786815268  | Up   | 3.38E-13 | 9.19E-13 | AAEL012282-PA OS=Aedes aegypti GN=AAEL012282 PE=4 SV=1                                      |
| CCG014576.2 | 1344 | 228  | 1583 | 7.28950855 | 41.17481557 | 2.49786873   | Up   | 1.05E-13 | 3.28E-13 | AAEL012608-PA OS=Aedes aegypti GN=AAEL012608 PE=4 SV=1                                      |
| CCG010434.1 | 1605 | 264  | 1583 | 7.06791896 | 34.4790979  | 2.286364625  | Up   | 0        | 0        | AAEL001111-PA OS=Aedes aegypti GN=AAEL001111 PE=4 SV=1                                      |
| CCG019620.1 | 4187 | 97   | 1584 | 0.99547749 | 13.22519952 | 3.731756982  | Up   | 3.62E-14 | 1.25E-13 | AAEL003361-PA OS=Aedes aegypti GN=AAEL003361 PE=4 SV=1                                      |
| CCG024188.1 | 1293 | 109  | 1584 | 3.62235195 | 42.82591679 | 3.563485499  | Up   | 0        | 0        | AAEL001681-PA OS=Aedes aegypti GN=AAEL001681 PE=4 SV=1                                      |
| CCG005594.1 | 4259 | 197  | 1584 | 1.98756462 | 13.00162254 | 2.709618004  | Up   | 0        | 0        | AAEL010595-PA OS=Aedes aegypti GN=AAEL010595 PE=3 SV=1                                      |
| CCG004453.1 | 796  | 273  | 1584 | 14.7371075 | 69.56521408 | 2.238912683  | Up   | 1.53E-14 | 5.41E-14 | Small nuclear ribonucleoprotein-associated protein OS=Aedes aegypti GN=AAEL002377 PE=2 SV=1 |
| CCG006775.1 | 2529 | 162  | 1585 | 2.75250969 | 21.90939845 | 2.992730326  | Up   | 0        | 0        | AAEL007521-PA OS=Aedes aegypti GN=AAEL007521 PE=4 SV=1                                      |
| CCG012493.1 | 811  | 278  | 1585 | 14.7294528 | 68.32166299 | 2.213639256  | Up   | 2.11E-14 | 7.38E-14 | AAEL004436-PA OS=Aedes aegypti GN=AAEL004436 PE=4 SV=1                                      |
| CCG011684.1 | 675  | 4701 | 1586 | 299.260329 | 82.1390029  | -1.865261706 | Down | 0        | 0        | AAEL001865-PA OS=Aedes aegypti GN=AAEL001865 PE=4 SV=1                                      |
| CCG013361.1 | 1395 | 12   | 1588 | 0.36963213 | 39.79479822 | 6.7503459    | Up   | 1.30E-07 | 2.49E-07 | AAEL000584-PA OS=Aedes aegypti GN=AAEL000584 PE=4 SV=1                                      |
| CCG005938.1 | 2721 | 320  | 1588 | 5.05340503 | 20.40196381 | 2.013380306  | Up   | 0        | 0        | AAEL009475-PA (Fragment) OS=Aedes aegypti GN=AAEL009475 PE=3 SV=1                           |
| CCG026514.1 | 2196 | 5499 | 1588 | 107.600442 | 25.27948247 | -2.08964517  | Down | 0        | 0        | AAEL010004-PA OS=Aedes aegypti GN=AAEL010004 PE=4 SV=1                                      |
| CCG009753.1 | 1382 | 159  | 1589 | 4.94369595 | 40.19442966 | 3.023333658  | Up   | 5.53E-14 | 1.84E-13 | AAEL006189-PA OS=Aedes aegypti GN=AAEL006189 PE=4 SV=1                                      |



|             |      |      |      |            |             |              |      |           |           |                                                                      |
|-------------|------|------|------|------------|-------------|--------------|------|-----------|-----------|----------------------------------------------------------------------|
| CCG026812.1 | 1351 | 413  | 1589 | 13.1358256 | 41.11672968 | 1.646218642  | Up   | 5.88E-13  | 1.51E-12  | AAEL013394-PA OS=Aedes aegypti GN=AAEL013394 PE=3 SV=1               |
| CCG025528.2 | 4578 | 3863 | 1589 | 36.2586467 | 12.13383613 | -1.579289349 | Down | 0         | 0         | AAEL011573-PA OS=Aedes aegypti GN=AAEL011573 PE=4 SV=1               |
| CCG014903.1 | 1719 | 8    | 1591 | 0.1999755  | 32.35521719 | 7.338031324  | Up   | 2.19E-06  | 3.97E-06  | AAEL011516-PA OS=Aedes aegypti GN=AAEL011516 PE=4 SV=1               |
| CCG017798.1 | 1509 | 191  | 1591 | 5.43884646 | 36.85793131 | 2.760602496  | Up   | 6.68E-14  | 2.19E-13  | AAEL001492-PA OS=Aedes aegypti GN=AAEL001492 PE=4 SV=1               |
| CCG028653.1 | 2386 | 370  | 1592 | 6.66337041 | 23.32505307 | 1.807556364  | Up   | 0         | 0         | Uncharacterized protein OS=Anopheles darlingi GN=AND_14317 PE=4 SV=1 |
| CCG017361.1 | 1533 | 423  | 1592 | 11.8566195 | 36.30370295 | 1.614423971  | Up   | 1.18E-13  | 3.65E-13  | AGAP001896-PA OS=Anopheles gambiae GN=AGAP001896 PE=4 SV=1           |
| CCG007356.1 | 4710 | 2785 | 1592 | 25.4077942 | 11.81604599 | -1.104523788 | Down | 2.85E-137 | 1.60E-136 | AAEL000597-PA OS=Aedes aegypti GN=AAEL000597 PE=3 SV=1               |
| CCG015725.1 | 1644 | 1    | 1593 | 0.02613731 | 33.87380468 | 10.33984376  | Up   | 0.000587  | 0.0009178 | AAEL000889-PA (Fragment) OS=Aedes aegypti GN=AAEL000889 PE=4 SV=2    |
| CCG023596.1 | 1464 | 180  | 1593 | 5.28316409 | 38.03861673 | 2.847990659  | Up   | 3.32E-13  | 9.05E-13  | AAEL003563-PA OS=Aedes aegypti GN=AAEL003563 PE=4 SV=1               |
| CCG027778.1 | 1191 | 91   | 1594 | 3.28316192 | 46.78714792 | 3.832954478  | Up   | 0         | 0         | AAEL013795-PA OS=Aedes aegypti GN=AAEL013795 PE=4 SV=1               |
| CCG007892.1 | 1368 | 271  | 1594 | 8.5122793  | 40.73354764 | 2.258600076  | Up   | 0         | 0         | AAEL002753-PA OS=Aedes aegypti GN=AAEL002753 PE=4 SV=1               |
| CCG004168.2 | 2019 | 3959 | 1595 | 84.2581374 | 27.6168655  | -1.60926644  | Down | 0         | 0         | AAEL013171-PA OS=Aedes aegypti GN=HPX2 PE=4 SV=1                     |
| CCG012857.1 | 2608 | 2969 | 1596 | 48.9176158 | 21.39317858 | -1.193203238 | Down | 2.27E-165 | 1.31E-164 | AAEL002938-PA OS=Aedes aegypti GN=AAEL002938 PE=3 SV=1               |
| CCG028221.1 | 887  | 343  | 1598 | 16.6162559 | 62.98007473 | 1.922300131  | Up   | 0         | 0         | -                                                                    |
| CCG028230.1 | 3411 | 629  | 1600 | 7.92376519 | 16.39790174 | 1.049253187  | Up   | 6.78E-13  | 1.71E-12  | AAEL012553-PA OS=Aedes aegypti GN=HOP PE=4 SV=2                      |
| CCG000651.1 | 314  | 9567 | 1600 | 1309.20844 | 178.1313466 | -2.877681489 | Down | 0         | 0         | AAEL010673-PA OS=Aedes aegypti GN=AAEL010673 PE=4 SV=1               |

|             |      |      |      |            |             |             |      |          |            |                                                                                          |
|-------------|------|------|------|------------|-------------|-------------|------|----------|------------|------------------------------------------------------------------------------------------|
| CCG001040.1 | 4413 | 251  | 1601 | 2.44400711 | 12.68257446 | 2.375527242 | Up   | 7.22E-14 | 2.35E-13   | AAEL001012-PA OS=Aedes aegypti GN=AAEL001612 PE=4 SV=1                                   |
| CCG024802.1 | 1569 | 327  | 1602 | 8.95545138 | 35.6935369  | 1.994824811 | Up   | 6.36E-13 | 1.62E-12   | AAEL013210-PA OS=Aedes aegypti GN=AAEL013210 PE=2 SV=1                                   |
| CCG022336.1 | 1824 | 22   | 1603 | 0.51827531 | 30.72265223 | 5.889440295 | Up   | 8.38E-11 | 1.80E-10   | AAEL015126-PA OS=Aedes aegypti GN=AAEL015128 PE=4 SV=1                                   |
| CCG003630.1 | 2009 | 175  | 1603 | 3.74300824 | 27.89353791 | 2.897660802 | Up   | 3.55E-13 | 9.58E-13   | AAEL000990-PA OS=Aedes aegypti GN=AAEL000990 PE=4 SV=1                                   |
| CCG026605.1 | 1779 | 216  | 1604 | 5.21723591 | 31.51943561 | 2.594884128 | Up   | 1.38E-13 | 4.17E-13   | Putative uncharacterized protein OS=Culex quinquefasciatus GN=CpipJ_CPIJ006272 PE=4 SV=1 |
| CCG008302.1 | 1098 | 2    | 1605 | 0.0782691  | 51.10021331 | 9.350670786 | Up   | 9.36E-05 | 0.00015395 | AAEL010638-PA OS=Aedes aegypti GN=AAEL010638 PE=3 SV=1                                   |
| CCG017448.1 | 1022 | 632  | 1606 | 26.5722821 | 54.93443493 | 1.047788633 | Up   | 0        | 0          | AAEL013212-PA OS=Aedes aegypti GN=AAEL013212 PE=4 SV=1                                   |
| CCG020460.1 | 1071 | 437  | 1608 | 17.5329356 | 52.48637633 | 1.581875425 | Up   | 5.07E-13 | 1.31E-12   | AAEL011462-PA OS=Aedes aegypti GN=AAEL011462 PE=4 SV=1                                   |
| CCG013292.1 | 1794 | 68   | 1609 | 1.62873019 | 31.35332627 | 4.266798973 | Up   | 0        | 0          | AAEL012962-PA OS=Aedes aegypti GN=AAEL012962 PE=3 SV=1                                   |
| CCG006104.1 | 3624 | 292  | 1609 | 3.46224131 | 15.52093469 | 2.164437256 | Up   | 0        | 0          | AAEL001436-PA OS=Aedes aegypti GN=AAEL001436 PE=4 SV=1                                   |
| CCG025210.1 | 506  | 489  | 1609 | 41.5260874 | 111.1617931 | 1.42057116  | Up   | 1.91E-13 | 5.51E-13   | AAEL005832-PA OS=Aedes aegypti GN=AAEL005832 PE=4 SV=1                                   |
| CCG014847.1 | 1569 | 611  | 1609 | 16.7332746 | 35.84950116 | 1.099233245 | Up   | 2.21E-13 | 6.33E-13   | AAEL010303-PA OS=Aedes aegypti GN=AAEL010303 PE=4 SV=1                                   |
| CCG000353.1 | 1896 | 7578 | 1609 | 171.742958 | 29.66659669 | -2.53333961 | Down | 0        | 0          | Uncharacterized protein OS=Anopheles darlingi GN=AND_22820 PE=3 SV=1                     |
| CCG025308.1 | 2784 | 363  | 1610 | 5.60273479 | 20.21653219 | 1.851332439 | Up   | 0        | 0          | AAEL006677-PA OS=Aedes aegypti GN=AAEL006677 PE=4 SV=1                                   |
| CCG000590.1 | 5292 | 521  | 1611 | 4.23039148 | 10.64206045 | 1.33091442  | Up   | 0        | 0          | AAEL008579-PA OS=Aedes aegypti GN=AAEL008579 PE=4 SV=1                                   |
| CCG025666.1 | 3182 | 620  | 1611 | 8.37248129 | 17.69886357 | 1.079929577 | Up   | 4.74E-13 | 1.23E-12   | AAEL012070-PA OS=Aedes aegypti GN=AAEL012070 PE=4 SV=1                                   |

|             |       |       |      |            |             |              |      |          |          |                                                                                |
|-------------|-------|-------|------|------------|-------------|--------------|------|----------|----------|--------------------------------------------------------------------------------|
| CCG007504.1 | 1518  | 361   | 1612 | 10.2187577 | 37.12301855 | 1.861094205  | Up   | 1.35E-13 | 4.08E-13 | AGAP000765-PA OS=Anopheles gambiae GN=AgaP_AGAP000765 PE=4 SV=3                |
| CCG027545.1 | 648   | 7742  | 1612 | 513.38223  | 86.96410827 | -2.56154136  | Down | 0        | 0        | AAEL0008072-PA OS=Aedes aegypti GN=AAEL0008072 PE=3 SV=1                       |
| CCG012410.1 | 1996  | 243   | 1613 | 5.23128533 | 28.25035092 | 2.433031423  | Up   | 1.53E-14 | 5.41E-14 | AAEL0006306-PA OS=Aedes aegypti GN=AAEL006306 PE=4 SV=1                        |
| CCG021995.1 | 2147  | 531   | 1613 | 10.627354  | 26.26348413 | 1.305275876  | Up   | 2.40E-13 | 6.77E-13 | AAEL014644-PA OS=Aedes aegypti GN=AAEL014644 PE=4 SV=1                         |
| CCG008969.2 | 2928  | 21093 | 1613 | 309.549389 | 19.25809441 | -4.006632753 | Down | 0        | 0        | Ubiquitin carboxyl-terminal hydrolase OS=Aedes aegypti GN=AAEL010854 PE=3 SV=1 |
| CCG012348.1 | 2349  | 471   | 1614 | 8.61589826 | 24.01986322 | 1.479154817  | Up   | 0        | 0        | AAEL000440-PA OS=Aedes aegypti GN=AAEL000440 PE=4 SV=1                         |
| CCG011310.1 | 1704  | 639   | 1614 | 16.1136505 | 33.11188891 | 1.039065946  | Up   | 4.28E-13 | 1.13E-12 | AAEL000321-PA OS=Aedes aegypti GN=AAEL000321 PE=4 SV=1                         |
| CCG019458.1 | 5013  | 190   | 1615 | 1.62861551 | 11.26224157 | 2.789776045  | Up   | 2.69E-13 | 7.52E-13 | AAEL009806-PA (Fragment) OS=Aedes aegypti GN=AAEL009806 PE=4 SV=1              |
| CCG001397.1 | 3602  | 420   | 1615 | 5.01035218 | 15.67396363 | 1.645386136  | Up   | 1.84E-13 | 5.32E-13 | AAEL0005272-PA OS=Aedes aegypti GN=AAEL0005272 PE=4 SV=1                       |
| CCG020877.1 | 2013  | 405   | 1617 | 8.6451776  | 28.08123872 | 1.69963907   | Up   | 2.34E-13 | 6.64E-13 | AAEL000199-PA OS=Aedes aegypti GN=AAEL000199 PE=3 SV=1                         |
| CCG023331.1 | 12801 | 470   | 1617 | 1.57767169 | 4.415868568 | 1.484900221  | Up   | 1.05E-12 | 2.59E-12 | AAEL011578-PA OS=Aedes aegypti GN=AAEL011578 PE=4 SV=1                         |
| CCG002865.1 | 3124  | 540   | 1617 | 7.42754696 | 18.09460101 | 1.28460157   | Up   | 9.26E-13 | 2.31E-12 | AAEL009495-PA (Fragment) OS=Aedes aegypti GN=AAEL009495 PE=4 SV=1              |
| CCG023805.1 | 1284  | 201   | 1619 | 6.72657061 | 44.07901098 | 2.712148783  | Up   | 0        | 0        | AAEL003101-PA OS=Aedes aegypti GN=AAEL003101 PE=4 SV=1                         |
| CCG006076.1 | 3286  | 339   | 1620 | 4.43297019 | 17.23445173 | 1.958949838  | Up   | 1.30E-13 | 3.98E-13 | AAEL007048-PA OS=Aedes aegypti GN=AAEL007048 PE=4 SV=1                         |
| CCG004050.1 | 2206  | 394   | 1620 | 7.67455822 | 25.67198929 | 1.742039482  | Up   | 5.49E-13 | 1.41E-12 | AAEL009424-PA OS=Aedes aegypti GN=AAEL009424 PE=4 SV=1                         |

|             |      |       |      |            |             |              |      |          |          |                                                                                                   |
|-------------|------|-------|------|------------|-------------|--------------|------|----------|----------|---------------------------------------------------------------------------------------------------|
| CCG018181.1 | 1935 | 182   | 1621 | 4.04159778 | 29.2854608  | 2.857186939  | Up   | 0        | 0        | AAEL002594-PA (Fragment)<br>OS=Aedes aegypti<br>GN=AAEL002594 PE=4 SV=1                           |
| CCG017031.1 | 2904 | 441   | 1621 | 6.52536259 | 19.51355601 | 1.580346734  | Up   | 0        | 0        | AAEL003791-PA OS=Aedes<br>aegypti GN=AAEL003791 PE=4<br>SV=1                                      |
| CCG016689.2 | 4089 | 244   | 1622 | 2.56410253 | 13.8670396  | 2.43513397   | Up   | 2.78E-13 | 7.73E-13 | Putative uncharacterized protein<br>OS=Culex quinquefasciatus<br>GN=CpipJ_CPIJ014927 PE=4<br>SV=1 |
| CCG016831.1 | 2910 | 425   | 1622 | 6.27564853 | 19.48533503 | 1.634552277  | Up   | 1.58E-12 | 3.80E-12 | AAEL001144-PA OS=Aedes<br>aegypti GN=AAEL001144 PE=4<br>SV=1                                      |
| CCG018290.1 | 3894 | 16066 | 1622 | 177.286019 | 14.56145992 | -3.605851853 | Down | 0        | 0        | Malic enzyme OS=Aedes aegypti<br>GN=AAEL001091 PE=3 SV=1                                          |
| CCG026511.1 | 1493 | 318   | 1623 | 9.15229444 | 38.00219906 | 2.053877533  | Up   | 1.20E-13 | 3.69E-13 | AAEL010893-PA OS=Aedes<br>aegypti GN=AAEL010893 PE=2<br>SV=1                                      |
| CCG026054.2 | 628  | 273   | 1624 | 18.6795184 | 90.4016584  | 2.27489198   | Up   | 1.53E-14 | 5.41E-14 | AAEL012710-PA OS=Aedes<br>aegypti GN=AAEL012710 PE=4<br>SV=1                                      |
| CCG005889.1 | 1065 | 481   | 1624 | 19.4069881 | 53.30726899 | 1.457756037  | Up   | 0        | 0        | Zinc-finger protein MCG4<br>OS=Culex quinquefasciatus<br>GN=CpipJ_CPIJ006296 PE=4<br>SV=1         |
| CCG021881.1 | 2810 | 245   | 1626 | 3.74647152 | 20.22852599 | 2.432786807  | Up   | 3.40E-13 | 9.24E-13 | AAEL012247-PA OS=Aedes<br>aegypti GN=AAEL012247 PE=4<br>SV=1                                      |
| CCG024919.1 | 4842 | 490   | 1626 | 4.34844485 | 11.73939654 | 1.432786807  | Up   | 0        | 0        | AAEL001583-PA OS=Aedes<br>aegypti GN=AAEL001583 PE=4<br>SV=1                                      |
| CCG011813.1 | 4457 | 650   | 1626 | 6.26662048 | 12.75345704 | 1.025128838  | Up   | 0        | 0        | AAEL013098-PA OS=Aedes<br>aegypti GN=AAEL013098 PE=4<br>SV=1                                      |
| CCG003094.1 | 2146 | 143   | 1627 | 2.8633141  | 26.50378206 | 3.210440403  | Up   | 0        | 0        | AAEL000136-PA OS=Aedes<br>aegypti GN=AAEL000136 PE=4<br>SV=1                                      |
| CCG009489.1 | 1227 | 7     | 1628 | 0.24514111 | 46.38310887 | 7.563843266  | Up   | 4.31E-06 | 7.71E-06 | AAEL007584-PA OS=Aedes<br>aegypti GN=AAEL007584 PE=4<br>SV=1                                      |
| CCG004973.1 | 3138 | 224   | 1628 | 3.06731056 | 18.13641638 | 2.563843266  | Up   | 2.04E-13 | 5.88E-13 | Structural maintenance of<br>chromosomes protein OS=Aedes<br>aegypti GN=AAEL001655 PE=3<br>SV=1   |
| CCG008516.1 | 2367 | 67    | 1629 | 1.21629583 | 24.05873801 | 4.305994902  | Up   | 0        | 0        | AAEL004244-PA OS=Aedes<br>aegypti GN=AAEL004244 PE=4<br>SV=1                                      |

|             |       |       |      |            |             |              |      |           |            |                                                                                                                     |
|-------------|-------|-------|------|------------|-------------|--------------|------|-----------|------------|---------------------------------------------------------------------------------------------------------------------|
| CCG017539.1 | 12302 | 2677  | 1629 | 9.35051045 | 4.629087373 | -1.014317331 | Down | 5.19E-115 | 2.81E-114  | AAEL001969-PA OS=Aedes aegypti GN=AAEL001969 PE=4 SV=1                                                              |
| CCG026798.1 | 3204  | 469   | 1630 | 6.28988937 | 17.78464143 | 1.49952534   | Up   | 0         | 0          | AGAP002411-PA OS=Anopheles gambiae GN=AgaP_AGAP002411 PE=4 SV=5                                                     |
| CCG021072.1 | 1893  | 3123  | 1630 | 70.8898474 | 30.10142163 | -1.235747401 | Down | 1.04E-183 | 6.11E-183  | Catalase (Fragment) OS=Aedes aegypti PE=2 SV=1                                                                      |
| CCG023752.1 | 1080  | 2     | 1631 | 0.07957358 | 52.79347168 | 9.373854271  | Up   | 9.36E-05  | 0.00015343 | AAEL009263-PA OS=Aedes aegypti GN=AAEL009263 PE=2 SV=1                                                              |
| CCG013205.1 | 3895  | 218   | 1632 | 2.4049813  | 14.64747309 | 2.606554221  | Up   | 0         | 0          | PRP16 mRNA splicing factor ATP-dependent RNA helicase PRP16 OS=Culex quinquefasciatus GN=CpipJ_CPIJ003160 PE=4 SV=1 |
| CCG006974.1 | 330   | 563   | 1633 | 73.3089715 | 172.9905029 | 1.238631167  | Up   | 2.33E-14  | 8.15E-14   | AAEL010652-PA OS=Aedes aegypti GN=AAEL010652 PE=4 SV=1                                                              |
| CCG020640.1 | 1896  | 404   | 1634 | 9.1559983  | 30.12754443 | 1.718293989  | Up   | 1.18E-13  | 3.64E-13   | AAEL014054-PA OS=Aedes aegypti GN=AAEL014054 PE=4 SV=1                                                              |
| CCG017735.1 | 16950 | 3010  | 1634 | 7.63061364 | 3.37001913  | -1.1790423   | Down | 1.73E-164 | 1.00E-163  | -                                                                                                                   |
| CCG023819.1 | 1896  | 102   | 1635 | 2.31166294 | 30.14598234 | 3.704962782  | Up   | 0         | 0          | KanBP-type and CSHC4-type zinc finger-containing protein 1 OS=Culex quinquefasciatus GN=CpipJ_CPIJ004842 PE=4 SV=1  |
| CCG025661.1 | 1946  | 390   | 1636 | 8.61161177 | 29.38938376 | 1.770939923  | Up   | 6.59E-13  | 1.67E-12   | AAEL001350-PA OS=Aedes aegypti GN=AAEL001350 PE=4 SV=1                                                              |
| CCG015414.1 | 6354  | 595   | 1636 | 4.02376331 | 9.000903494 | 1.161524379  | Up   | 7.20E-13  | 1.81E-12   | AAEL013079-PA (Fragment) OS=Aedes aegypti GN=AAEL013079 PE=4 SV=1                                                   |
| CCG021164.1 | 2220  | 398   | 1637 | 7.70358305 | 25.77779238 | 1.74252719   | Up   | 7.64E-13  | 1.92E-12   | AAEL010933-PA OS=Aedes aegypti GN=AAEL010933 PE=4 SV=1                                                              |
| CCG016901.1 | 1739  | 249   | 1638 | 6.1526532  | 32.92792257 | 2.420030913  | Up   | 0         | 0          | AAEL004838-PA OS=Aedes aegypti GN=AAEL004838 PE=4 SV=1                                                              |
| CCG026839.1 | 642   | 10464 | 1638 | 700.366516 | 89.1926127  | -2.97311398  | Down | 0         | 0          | -                                                                                                                   |
| CCG018432.1 | 2580  | 152   | 1639 | 2.53155026 | 22.20799055 | 3.132985829  | Up   | 8.39E-14  | 2.69E-13   | AAEL011815-PA OS=Aedes aegypti GN=AAEL011815 PE=4 SV=1                                                              |

|             |       |      |      |            |             |              |      |           |           |                                                                                                  |
|-------------|-------|------|------|------------|-------------|--------------|------|-----------|-----------|--------------------------------------------------------------------------------------------------|
| CCG022140.1 | 13455 | 8392 | 1639 | 26.8005955 | 4.258388378 | -2.65388562  | Down | 0         | 0         | AAEL009869-PA OS=Aedes aegypti GN=AAEL009869 PE=4 SV=1                                           |
| CCG020840.1 | 50895 | 646  | 1641 | 0.5454062  | 1.127154577 | 1.047282373  | Up   | 1.08E-12  | 2.64E-12  | AAEL002063-PA OS=Aedes aegypti GN=AAEL002063 PE=4 SV=1                                           |
| CCG018533.1 | 1023  | 394  | 1642 | 16.5494384 | 56.11093887 | 1.761499796  | Up   | 5.49E-13  | 1.41E-12  | AAEL008696-PA (Fragment) OS=Aedes aegypti GN=AAEL008696 PE=4 SV=1                                |
| CCG018318.2 | 1470  | 56   | 1644 | 1.63694227 | 39.09619525 | 4.577952865  | Up   | 0         | 0         | AAEL013830-PA OS=Aedes aegypti GN=AAEL013830 PE=4 SV=1                                           |
| CCG015802.1 | 3201  | 104  | 1644 | 1.3960801  | 17.954204   | 3.684868069  | Up   | 0         | 0         | Nkt1, nikkomycin biosynthesis protein P6 OS=Culex quinquefasciatus GN=CpipJ_CPIJ005325 PE=4 SV=1 |
| CCG021985.1 | 2514  | 106  | 1644 | 1.81177083 | 22.86054376 | 3.657387333  | Up   | 0         | 0         | AAEL012420-PA OS=Aedes aegypti GN=AAEL012420 PE=4 SV=1                                           |
| CCG013842.1 | 17163 | 6334 | 1645 | 15.8579677 | 3.350601019 | -2.24271608  | Down | 0         | 0         | Sensory appendage protein OS=Culex quinquefasciatus GN=CpipJ_CPIJ002629 PE=4 SV=1                |
| CCG026209.1 | 4890  | 607  | 1646 | 5.33387094 | 11.76714183 | 1.141509118  | Up   | 0         | 0         | Purative uncharacterized protein OS=Culex quinquefasciatus GN=CpipJ_CPIJ002903 PE=4 SV=1         |
| CCG013250.1 | 3909  | 4203 | 1646 | 46.2015335 | 14.7202158  | -1.650141917 | Down | 0         | 0         | AAEL000882-PA OS=Aedes aegypti GN=AAEL008882 PE=4 SV=1                                           |
| CCG010716.1 | 1917  | 91   | 1647 | 2.03977353 | 30.03457582 | 3.880143403  | Up   | 0         | 0         | AAEL014679-PA OS=Aedes aegypti GN=AAEL014679 PE=4 SV=1                                           |
| CCG001477.1 | 981   | 314  | 1647 | 13.7538192 | 58.6914188  | 2.093317295  | Up   | 4.97E-14  | 1.68E-13  | AAEL001496-PA OS=Aedes aegypti GN=AAEL001496 PE=4 SV=1                                           |
| CCG003854.1 | 1412  | 3082 | 1648 | 93.7908797 | 40.80116156 | -1.200837416 | Down | 2.51E-173 | 1.46E-172 | AAEL0006976-PA OS=Aedes aegypti GN=AAEL006976 PE=4 SV=1                                          |
| CCG024813.1 | 1698  | 242  | 1649 | 6.1240729  | 33.94946902 | 2.47082565   | Up   | 3.87E-13  | 1.03E-12  | AAEL0008220-PA OS=Aedes aegypti GN=AAEL008220 PE=4 SV=1                                          |
| CCG010820.1 | 3832  | 583  | 1649 | 6.53741004 | 15.04337119 | 1.202336814  | Up   | 2.70E-13  | 7.54E-13  | AAEL002437-PA OS=Aedes aegypti GN=AAEL002437 PE=4 SV=1                                           |
| CCG002037.1 | 1956  | 161  | 1650 | 3.53687488 | 29.4893439  | 3.059646635  | Up   | 0         | 0         | AAEL000834-PA OS=Aedes aegypti GN=AAEL008834 PE=4 SV=1                                           |

|             |      |      |      |            |             |              |      |           |           |                                                                                          |
|-------------|------|------|------|------------|-------------|--------------|------|-----------|-----------|------------------------------------------------------------------------------------------|
| CCG014756.1 | 1681 | 454  | 1650 | 11.6051514 | 34.31359707 | 1.564015026  | Up   | 3.16E-13  | 8.66E-13  | AAEL002636-PA OS=Aedes aegypti GN=AAEL002636 PE=2 SV=1                                   |
| CCG018422.1 | 1025 | 354  | 1651 | 14.8402791 | 56.30840483 | 1.923832059  | Up   | 0         | 0         | AAEL007015-PA OS=Aedes aegypti GN=AAEL007015 PE=4 SV=1                                   |
| CCG014866.1 | 1752 | 181  | 1653 | 4.43922487 | 32.98289469 | 2.893338326  | Up   | 1.53E-13  | 4.55E-13  | AAEL014400-PA OS=Aedes aegypti GN=AAEL014400 PE=4 SV=1                                   |
| CCG019678.1 | 795  | 3042 | 1653 | 164.420041 | 72.68683208 | -1.177620225 | Down | 6.76E-166 | 3.91E-165 | ATP synthase subunit beta OS=Culex quinquefasciatus GN=CpipJ_CPIJ006209 PE=3 SV=1        |
| CCG016808.1 | 3948 | 206  | 1655 | 2.24208848 | 14.65449546 | 2.708428178  | Up   | 1.10E-13  | 3.43E-13  | AAEL007436-PA (Fragment) OS=Aedes aegypti GN=AAEL007436 PE=4 SV=1                        |
| CCG012214.1 | 1496 | 580  | 1655 | 16.6593891 | 38.67376207 | 1.215019615  | Up   | 7.73E-14  | 2.49E-13  | AAEL008007-PA OS=Aedes aegypti GN=AAEL008007 PE=4 SV=1                                   |
| CCG011788.1 | 3081 | 345  | 1656 | 4.81160612 | 18.78964827 | 1.96534761   | Up   | 9.59E-13  | 2.38E-12  | AAEL012378-PA OS=Aedes aegypti GN=AAEL012378 PE=4 SV=1                                   |
| CCG007773.2 | 3120 | 569  | 1657 | 7.83646763 | 18.56598225 | 1.244386249  | Up   | 0         | 0         | Rab1-interacting OS=Culex quinquefasciatus GN=CpipJ_CPIJ006771 PE=4 SV=1                 |
| CCG003605.1 | 1106 | 4120 | 1659 | 160.068089 | 52.43741516 | -1.610017247 | Down | 0         | 0         | Peptidyl-prolyl cis-trans isomerase OS=Aedes aegypti GN=AAEL013279 PE=2 SV=1             |
| CCG001648.1 | 1257 | 3778 | 1661 | 129.148494 | 46.19387249 | -1.483257425 | Down | 1.68E-293 | 1.06E-292 | AAEL007881-PA OS=Aedes aegypti GN=AAEL007881 PE=4 SV=1                                   |
| CCG028239.1 | 765  | 154  | 1662 | 8.65011651 | 75.94856993 | 3.13423133   | Up   | 1.82E-13  | 5.28E-13  | AAEL008784-PA OS=Aedes aegypti GN=AAEL008784 PE=3 SV=1                                   |
| CCG014769.1 | 1359 | 356  | 1662 | 11.2562366 | 42.75250625 | 1.92528444   | Up   | 7.93E-13  | 1.99E-12  | AAEL012501-PA OS=Aedes aegypti GN=AAEL012501 PE=4 SV=1                                   |
| CCG027156.1 | 1203 | 360  | 1662 | 12.8587734 | 48.29647215 | 1.909164774  | Up   | 5.08E-13  | 1.32E-12  | AAEL003508-PA OS=Aedes aegypti GN=AAEL003508 PE=3 SV=1                                   |
| CCG022136.1 | 1671 | 214  | 1663 | 5.50300611 | 34.79091219 | 2.660418671  | Up   | 0         | 0         | Putative uncharacterized protein OS=Culex quinquefasciatus GN=CpipJ_CPIJ018768 PE=4 SV=1 |
| CCG023740.2 | 3360 | 439  | 1663 | 5.61420044 | 17.30226615 | 1.623808528  | Up   | 0         | 0         | AAEL012019-PA OS=Aedes aegypti GN=AAEL012019 PE=4 SV=1                                   |

|             |      |       |      |            |             |              |      |          |          |                                                                                           |
|-------------|------|-------|------|------------|-------------|--------------|------|----------|----------|-------------------------------------------------------------------------------------------|
| CCG022735.1 | 2586 | 76    | 1664 | 1.26283829 | 22.49442094 | 4.154825409  | Up   | 0        | 0        | AAEL007007-PA OS=Aedes aegypti GN=AAEL007007 PE=3 SV=1                                    |
| CCG022364.1 | 944  | 52    | 1665 | 2.36697691 | 61.6584013  | 4.703179948  | Up   | 0        | 0        | Protease III zinc metalloprotease OS=Culex quinquefasciatus GN=CpipJ_CPIJ001046 PE=4 SV=1 |
| CCG021197.1 | 2074 | 9487  | 1665 | 196.554422 | 28.06438323 | -2.808116566 | Down | 0        | 0        | AAEL0006833-PA OS=Aedes aegypti GN=AAEL006833 PE=2 SV=1                                   |
| CCG007758.1 | 1812 | 259   | 1666 | 6.14192123 | 32.14155028 | 2.387677601  | Up   | 0        | 0        | AAEL010781-PA OS=Aedes aegypti GN=AAEL010781 PE=4 SV=1                                    |
| CCG026015.1 | 1461 | 4732  | 1666 | 139.173706 | 39.86344223 | -1.803748469 | Down | 0        | 0        | AAEL011126-PA OS=Aedes aegypti GN=AAEL011126 PE=3 SV=1                                    |
| CCG001083.1 | 3273 | 94    | 1667 | 1.23408343 | 17.80490296 | 3.850762741  | Up   | 0        | 0        | AAEL013313-PA OS=Aedes aegypti GN=AAEL013313 PE=4 SV=1                                    |
| CCG026089.1 | 1567 | 581   | 1668 | 15.931982  | 37.21149053 | 1.223822424  | Up   | 0        | 0        | Uncharacterized protein OS=Anopheles darlingi GN=AND_00721 PE=4 SV=1                      |
| CCG024511.1 | 1284 | 253   | 1669 | 8.46677793 | 45.44031459 | 2.424087868  | Up   | 3.13E-13 | 8.61E-13 | AAEL002891-PA OS=Aedes aegypti GN=AAEL002891 PE=4 SV=1                                    |
| CCG025935.2 | 2672 | 563   | 1669 | 9.05387746 | 21.8358398  | 1.270090331  | Up   | 2.33E-14 | 8.15E-14 | AAEL006172-PA OS=Aedes aegypti GN=AAEL006172 PE=4 SV=1                                    |
| CCG010378.2 | 4313 | 104   | 1670 | 1.0361355  | 13.53589664 | 3.707505873  | Up   | 0        | 0        | DNA polymerase OS=Aedes aegypti GN=AAEL009851 PE=3 SV=1                                   |
| CCG016407.1 | 2502 | 320   | 1671 | 5.49572945 | 23.34743425 | 2.086881127  | Up   | 0        | 0        | AAEL008020-PA OS=Aedes aegypti GN=AAEL008020 PE=4 SV=1                                    |
| CCG023563.1 | 855  | 35057 | 1671 | 1761.85963 | 68.32196548 | -4.688605701 | Down | 0        | 0        | AAEL002759-PA OS=Aedes aegypti GN=AAEL002759 PE=3 SV=1                                    |
| CCG019455.1 | 2280 | 134   | 1672 | 2.52541423 | 25.63606963 | 3.343583145  | Up   | 0        | 0        | AAEL011626-PA OS=Aedes aegypti GN=AAEL011626 PE=4 SV=1                                    |
| CCG010968.1 | 897  | 186   | 1672 | 8.91011219 | 65.16191612 | 2.870513525  | Up   | 6.43E-13 | 1.64E-12 | AAEL000198-PA OS=Aedes aegypti GN=AAEL000198 PE=4 SV=1                                    |
| CCG020627.1 | 3299 | 244   | 1673 | 3.1781192  | 17.72815915 | 2.479797596  | Up   | 2.78E-13 | 7.73E-13 | Zinc finger protein 363 OS=Culex quinquefasciatus GN=CpipJ_CPIJ000911 PE=4 SV=1           |
| CCG020554.1 | 1131 | 9813  | 1674 | 372.822286 | 51.74195872 | -2.849081528 | Down | 0        | 0        | AAEL005964-PA OS=Aedes aegypti GN=AAEL005964 PE=3 SV=1                                    |



|             |       |      |      |            |             |              |      |           |           |                                                                                          |
|-------------|-------|------|------|------------|-------------|--------------|------|-----------|-----------|------------------------------------------------------------------------------------------|
| CCG009235.1 | 1935  | 199  | 1675 | 4.41910966 | 30.26104062 | 2.775633964  | Up   | 0         | 0         | AAEL000674-PA OS=Aedes aegypti GN=AAEL000674 PE=4 SV=1                                   |
| CCG007076.1 | 1041  | 411  | 1675 | 16.9649961 | 56.24890835 | 1.729264     | Up   | 0         | 0         | AAEL004448-PA OS=Aedes aegypti GN=AAEL004448 PE=4 SV=1                                   |
| CCG024810.1 | 1948  | 75   | 1676 | 1.6543789  | 30.07703895 | 4.184300947  | Up   | 0         | 0         | AAEL014528-PA OS=Aedes aegypti GN=AAEL014528 PE=4 SV=1                                   |
| CCG010546.1 | 3705  | 198  | 1676 | 2.29635829 | 15.81378458 | 2.783763017  | Up   | 0         | 0         | AAEL012637-PA OS=Aedes aegypti GN=AAEL012637 PE=4 SV=1                                   |
| CCG012790.1 | 1461  | 3841 | 1677 | 112.968344 | 40.12664623 | -1.493286071 | Down | 2.24E-301 | 1.42E-300 | AAEL007452-PA OS=Aedes aegypti GN=AAEL007452 PE=4 SV=1                                   |
| CCG025513.1 | 1172  | 145  | 1678 | 5.31622143 | 50.05118466 | 3.234931114  | Up   | 0         | 0         | AAEL009879-PA OS=Aedes aegypti GN=AAEL009879 PE=4 SV=1                                   |
| CCG002758.1 | 1914  | 203  | 1678 | 4.5573961  | 30.64785184 | 2.749504287  | Up   | 9.28E-14  | 2.93E-13  | Putative uncharacterized protein OS=Culex quinquefasciatus GN=CpipJ_CPIJ016156 PE=4 SV=1 |
| CCG011767.1 | 12830 | 529  | 1682 | 1.77170613 | 4.582994663 | 1.371151282  | Up   | 0         | 0         | AAEL011810-PA OS=Aedes aegypti GN=AAEL011810 PE=4 SV=1                                   |
| CCG026745.1 | 1673  | 140  | 1684 | 3.59579369 | 35.18812796 | 3.29070661   | Up   | 0         | 0         | AAEL000001-PA OS=Aedes aegypti GN=AAEL000001 PE=4 SV=1                                   |
| CCG026501.1 | 2157  | 670  | 1684 | 13.3471127 | 27.2924145  | 1.031972342  | Up   | 8.60E-13  | 2.15E-12  | AAEL010063-PA OS=Aedes aegypti GN=AAEL010063 PE=3 SV=1                                   |
| CCG024261.1 | 2431  | 157  | 1685 | 2.77509187 | 24.23064433 | 3.126225331  | Up   | 0         | 0         | Elongation factor 1-alpha OS=Culex quinquefasciatus GN=CpipJ_CPIJ002376 PE=4 SV=1        |
| CCG024910.1 | 4281  | 143  | 1687 | 1.43533568 | 13.7758965  | 3.262686125  | Up   | 0         | 0         | AAEL011477-PA OS=Aedes aegypti GN=AAEL011477 PE=4 SV=1                                   |
| CCG011908.1 | 11679 | 441  | 1687 | 1.62254071 | 5.049628642 | 1.637922617  | Up   | 0         | 0         | AGAP000420-PA OS=Anopheles gambiae GN=AgaP_AGAP000420 PE=4 SV=3                          |
| CCG015357.1 | 2637  | 490  | 1687 | 7.98451648 | 22.36428249 | 1.485919523  | Up   | 0         | 0         | AAEL011277-PA (Fragment) OS=Aedes aegypti GN=AAEL011277 PE=4 SV=1                        |
| CCG013353.1 | 4527  | 54   | 1689 | 0.51256145 | 13.04275005 | 4.669379314  | Up   | 0         | 0         | DNA polymerase OS=Aedes aegypti GN=AAEL008247 PE=3 SV=1                                  |

|             |       |      |      |            |             |              |      |          |          |                                                                                          |
|-------------|-------|------|------|------------|-------------|--------------|------|----------|----------|------------------------------------------------------------------------------------------|
| CCG016140.1 | 2098  | 78   | 1690 | 1.59754018 | 28.15990836 | 4.139718516  | Up   | 0        | 0        | AAEL015455-PA OS=Aedes aegypti GN=AAEL015455 PE=4 SV=1                                   |
| CCG011097.1 | 1399  | 593  | 1690 | 18.2137617 | 42.22979825 | 1.21323244   | Up   | 1.13E-12 | 2.78E-12 | AAEL005197-PA OS=Aedes aegypti GN=AAEL005197 PE=4 SV=1                                   |
| CCG021451.2 | 1463  | 542  | 1696 | 15.9190678 | 40.52579454 | 1.348084617  | Up   | 0        | 0        | AAEL005550-PA OS=Aedes aegypti GN=AAEL003550 PE=2 SV=1                                   |
| CCG006465.1 | 7287  | 5401 | 1696 | 31.8484337 | 8.136302649 | -1.968777175 | Down | 0        | 0        | AAEL012612-PA OS=Aedes aegypti GN=AAEL012612 PE=4 SV=1                                   |
| CCG019148.1 | 34442 | 499  | 1697 | 0.62255088 | 1.722437596 | 1.468188048  | Up   | 0        | 0        | AAEL005267-PA OS=Aedes aegypti GN=AAEL005267 PE=4 SV=1                                   |
| CCG027349.1 | 1715  | 653  | 1697 | 16.361071  | 34.59136774 | 1.080144872  | Up   | 5.96E-13 | 1.53E-12 | Dehydrogenase-like protein OS=Aedes aegypti PE=2 SV=1                                    |
| CCG011415.1 | 2807  | 396  | 1698 | 6.0619932  | 21.14683077 | 1.802577327  | Up   | 4.78E-13 | 1.24E-12 | Putative uncharacterized protein OS=Culex quinquefasciatus GN=CpipJ_CPIJ010150 PE=4 SV=1 |
| CCG028219.1 | 1569  | 454  | 1698 | 12.4335625 | 37.83247544 | 1.60538546   | Up   | 3.16E-13 | 8.65E-13 | AAEL010254-PA OS=Aedes aegypti GN=AAEL010254 PE=4 SV=1                                   |
| CCG003451.1 | 2110  | 121  | 1699 | 2.46414118 | 28.14886836 | 3.513920104  | Up   | 0        | 0        | AAEL006112-PA OS=Aedes aegypti GN=AAEL006112 PE=4 SV=1                                   |
| CCG011101.1 | 1326  | 335  | 1699 | 10.855853  | 44.79193985 | 2.044766056  | Up   | 8.48E-14 | 2.70E-13 | AAEL005208-PA OS=Aedes aegypti GN=AAEL005208 PE=2 SV=1                                   |
| CCG000445.1 | 3600  | 424  | 1699 | 5.06087985 | 16.49836451 | 1.704862886  | Up   | 0        | 0        | AAEL011751-PA OS=Aedes aegypti GN=AAEL011751 PE=4 SV=1                                   |
| CCG009700.1 | 1449  | 264  | 1700 | 7.82885434 | 41.01385129 | 2.389238115  | Up   | 0        | 0        | AAEL005958-PA OS=Aedes aegypti GN=AAEL003938 PE=4 SV=1                                   |
| CCG007082.1 | 1548  | 44   | 1701 | 1.22136197 | 38.41345529 | 4.975049011  | Up   | 3.91E-14 | 1.34E-13 | -                                                                                        |
| CCG020830.1 | 2728  | 280  | 1701 | 4.41038332 | 21.79766451 | 2.305197613  | Up   | 0        | 0        | AAEL011062-PA OS=Aedes aegypti GN=AAEL011062 PE=4 SV=1                                   |
| CCG020871.1 | 3429  | 79   | 1702 | 0.98997056 | 17.35170226 | 4.131547777  | Up   | 0        | 0        | AAEL000201-PA (Fragment) OS=Aedes aegypti GN=AAEL000201 PE=4 SV=1                        |
| CCG016503.1 | 1086  | 293  | 1702 | 11.5931236 | 54.78728091 | 2.240571671  | Up   | 4.19E-13 | 1.11E-12 | AAEL013484-PA OS=Aedes aegypti GN=AAEL013484 PE=4 SV=1                                   |
| CCG021716.1 | 1988  | 470  | 1702 | 10.1588407 | 29.92906794 | 1.558811579  | Up   | 1.05E-12 | 2.59E-12 | AAEL005037-PA OS=Aedes aegypti GN=AAEL005037 PE=3 SV=1                                   |

|             |      |     |      |            |             |             |    |          |          |                                                                                  |
|-------------|------|-----|------|------------|-------------|-------------|----|----------|----------|----------------------------------------------------------------------------------|
| CCG002247.1 | 530  | 535 | 1703 | 43.3751095 | 112.3281988 | 1.372780842 | Up | 2.42E-14 | 8.43E-14 | AAEL004278-PA OS=Aedes aegypti GN=AAEL004278 PE=4 SV=1                           |
| CCG028345.1 | 3690 | 156 | 1704 | 1.81660667 | 16.14333431 | 3.151620605 | Up | 1.42E-13 | 4.26E-13 | AAEL009515-PA (Fragment) OS=Aedes aegypti GN=AAEL009515 PE=4 SV=1                |
| CCG017868.1 | 2111 | 256 | 1705 | 5.21091997 | 28.23489431 | 2.437869228 | Up | 0        | 0        | AAEL004920-PA OS=Aedes aegypti GN=AAEL004920 PE=4 SV=1                           |
| CCG017181.1 | 2318 | 119 | 1706 | 2.20595273 | 25.72856781 | 3.543897372 | Up | 0        | 0        | AAEL013590-PA OS=Aedes aegypti GN=AAEL013590 PE=4 SV=1                           |
| CCG013126.2 | 1426 | 586 | 1706 | 17.6579695 | 41.82245454 | 1.243958281 | Up | 0        | 0        | AAEL001525-PA (Fragment) OS=Aedes aegypti GN=AAEL001525 PE=4 SV=1                |
| CCG024183.1 | 1808 | 285 | 1709 | 6.77343715 | 33.0440791  | 2.286431776 | Up | 4.57E-13 | 1.20E-12 | AAEL013982-PA OS=Aedes aegypti GN=AAEL013982 PE=4 SV=1                           |
| CCG004593.1 | 4184 | 389 | 1710 | 3.99503508 | 14.28744103 | 1.838467469 | Up | 0        | 0        | DNA repair protein RAD50 OS=Culex quinquefasciatus GN=CpipJ_CPIJ004115 PE=4 SV=1 |
| CCG014899.1 | 1458 | 595 | 1710 | 17.5356599 | 41.00044807 | 1.225347955 | Up | 7.20E-13 | 1.81E-12 | AAEL012117-PA (Fragment) OS=Aedes aegypti GN=AAEL012117 PE=3 SV=1                |
| CCG001453.2 | 1989 | 369 | 1711 | 7.97176072 | 30.07220289 | 1.915460242 | Up | 0        | 0        | GE11757 OS=Drosophila yakuba GN=GE11757 PE=4 SV=1                                |
| CCG007767.1 | 2100 | 96  | 1712 | 1.96433073 | 28.49931897 | 3.858817689 | Up | 0        | 0        | AGAP013200-PA OS=Anopheles gambiae GN=AgaP_AGAP013200 PE=4 SV=1                  |
| CCG002143.1 | 1095 | 465 | 1712 | 18.2474215 | 54.65622816 | 1.582693284 | Up | 0        | 0        | AAEL005358-PA OS=Aedes aegypti GN=AAEL005358 PE=4 SV=1                           |
| CCG020922.1 | 2013 | 218 | 1713 | 4.65345362 | 29.74839946 | 2.676438315 | Up | 0        | 0        | Zinc finger protein 250 OS=Culex quinquefasciatus GN=CpipJ_CPIJ001374 PE=4 SV=1  |
| CCG015205.2 | 282  | 394 | 1713 | 60.0357285 | 212.3529366 | 1.82257082  | Up | 5.49E-13 | 1.41E-12 | Putative secreted peptide OS=Aedes albopictus PE=4 SV=1                          |
| CCG011322.1 | 2169 | 100 | 1714 | 1.98108504 | 27.62493609 | 3.801608408 | Up | 0        | 0        | AAEL001915-PA OS=Aedes aegypti GN=AAEL001915 PE=3 SV=1                           |

|             |      |      |      |            |             |              |      |          |          |                                                                                                   |
|-------------|------|------|------|------------|-------------|--------------|------|----------|----------|---------------------------------------------------------------------------------------------------|
| CCG003051.1 | 3724 | 388  | 1715 | 4.47697557 | 16.09920641 | 1.846393223  | Up   | 3.43E-13 | 9.27E-13 | Putative uncharacterized protein<br>OS=Culex quinquefasciatus<br>GN=CpipJ_CPIJ001573 PE=4<br>SV=1 |
| CCG026288.1 | 4038 | 301  | 1718 | 3.20304362 | 14.87328368 | 2.215207848  | Up   | 0        | 0        | AAEL001716-PA OS=Aedes<br>aegypti GN=AAEL001716 PE=4<br>SV=1                                      |
| CCG013989.1 | 1625 | 502  | 1718 | 13.2743426 | 36.95896584 | 1.477283971  | Up   | 6.14E-13 | 1.57E-12 | AAEL013749-PA OS=Aedes<br>aegypti GN=AAEL013749 PE=4<br>SV=1                                      |
| CCG011969.1 | 3412 | 334  | 1720 | 4.20629876 | 17.62257797 | 2.066801761  | Up   | 3.15E-13 | 8.64E-13 | AAEL003075-PA OS=Aedes<br>aegypti GN=AAEL003075 PE=4<br>SV=1                                      |
| CCG005757.1 | 1919 | 421  | 1720 | 9.42691937 | 31.33310894 | 1.73282963   | Up   | 4.57E-13 | 1.20E-12 | AAEL009276-PA OS=Aedes<br>aegypti GN=AAEL009276 PE=4<br>SV=1                                      |
| CCG015865.1 | 3495 | 533  | 1722 | 6.55303821 | 17.224078   | 1.394190908  | Up   | 0        | 0        | AAEL007639-PA OS=Aedes<br>aegypti GN=AAEL007639 PE=4<br>SV=1                                      |
| CCG004091.1 | 1884 | 644  | 1725 | 14.6881683 | 32.00797634 | 1.123776972  | Up   | 2.78E-13 | 7.74E-13 | AAEL010521-PA OS=Aedes<br>aegypti GN=AAEL010521 PE=4<br>SV=1                                      |
| CCG016878.1 | 4347 | 496  | 1726 | 4.90291888 | 13.88037398 | 1.501333643  | Up   | 6.79E-13 | 1.71E-12 | AAEL005532-PA (Fragment)<br>OS=Aedes aegypti<br>GN=AAEL005532 PE=4 SV=1                           |
| CCG017519.1 | 1842 | 208  | 1727 | 4.85217416 | 32.77575678 | 2.755925853  | Up   | 3.93E-13 | 1.05E-12 | AAEL005943-PA OS=Aedes<br>aegypti GN=AAEL005943 PE=4<br>SV=1                                      |
| CCG010634.1 | 852  | 320  | 1727 | 16.1388675 | 70.86026289 | 2.134437476  | Up   | 0        | 0        | AAEL010053-PA OS=Aedes<br>aegypti GN=AAEL010053 PE=4<br>SV=1                                      |
| CCG026825.1 | 2100 | 487  | 1727 | 9.96488607 | 28.74902095 | 1.528587609  | Up   | 0        | 0        | Uncharacterized protein<br>OS=Anopheles darlingi<br>GN=AND_09750 PE=4 SV=1                        |
| CCG014566.1 | 1622 | 597  | 1727 | 15.8156175 | 37.22129716 | 1.23477845   | Up   | 0        | 0        | AAEL011995-PA OS=Aedes<br>aegypti GN=AAEL011995 PE=4<br>SV=1                                      |
| CCG002974.1 | 9534 | 682  | 1727 | 3.07377376 | 6.332383468 | 1.042737642  | Up   | 1.08E-12 | 2.66E-12 | Ubiquitin carboxyl-terminal<br>hydrolase OS=Aedes aegypti<br>GN=AAEL009702 PE=3 SV=1              |
| CCG009746.1 | 2077 | 74   | 1728 | 1.53093903 | 29.08420908 | 4.24774734   | Up   | 0        | 0        | AAEL003361-PA OS=Aedes<br>aegypti GN=AAEL003361 PE=4<br>SV=1                                      |
| CCG018113.1 | 2486 | 7097 | 1728 | 122.669431 | 24.29923663 | -2.335792885 | Down | 0        | 0        | AAEL003746-PA OS=Aedes<br>aegypti GN=AAEL003746 PE=4<br>SV=1                                      |

|             |       |       |      |            |             |              |      |          |          |                                                                       |
|-------------|-------|-------|------|------------|-------------|--------------|------|----------|----------|-----------------------------------------------------------------------|
| CCG004939.1 | 1209  | 11139 | 1728 | 395.897332 | 49.9651797  | -2.986131395 | Down | 0        | 0        | AAEL012950-PA OS=Aedes aegypti GN=AAEL012950 PE=2 SV=1                |
| CCG004955.1 | 1632  | 258   | 1729 | 6.79300952 | 37.03606651 | 2.446808102  | Up   | 1.69E-13 | 4.97E-13 | AAEL007853-PA OS=Aedes aegypti GN=AAEL007853 PE=4 SV=1                |
| CCG002662.1 | 1701  | 556   | 1733 | 14.0453689 | 35.61592807 | 1.34242807   | Up   | 1.85E-13 | 5.35E-13 | AAEL001200-PA OS=Aedes aegypti GN=AAEL001200 PE=3 SV=1                |
| CCG012519.1 | 3492  | 565   | 1733 | 6.95243415 | 17.34899589 | 1.319262086  | Up   | 4.06E-13 | 1.08E-12 | AGAP003818-PB OS=Anopheles gambiae GN=AgaP_AGAP003818 PE=4 SV=1       |
| CCG018101.1 | 33362 | 589   | 1733 | 0.75862279 | 1.815919119 | 1.259245319  | Up   | 0        | 0        | AAEL011390-PA OS=Aedes aegypti GN=AAEL011390 PE=4 SV=1                |
| CCG007630.1 | 3371  | 129   | 1735 | 1.6443476  | 17.99246817 | 3.451805896  | Up   | 0        | 0        | AAEL007480-PA (Fragment) OS=Aedes aegypti GN=AAEL007480 PE=4 SV=1     |
| CCG027230.1 | 525   | 285   | 1736 | 23.3264274 | 115.5953685 | 2.309046327  | Up   | 4.57E-13 | 1.20E-12 | AAEL014943-PA OS=Aedes aegypti GN=AAEL014943 PE=4 SV=1                |
| CCG013826.1 | 2433  | 100   | 1738 | 1.76612144 | 24.97225032 | 3.821669381  | Up   | 0        | 0        | AAEL011879-PA OS=Aedes aegypti GN=AAEL011879 PE=4 SV=1                |
| CCG012262.1 | 921   | 380   | 1739 | 17.7290979 | 66.00699599 | 1.896499813  | Up   | 0        | 0        | AAEL010906-PA OS=Aedes aegypti GN=AAEL010906 PE=4 SV=1                |
| CCG013298.1 | 795   | 39    | 1740 | 2.10794925 | 76.51245482 | 5.181782576  | Up   | 7.33E-14 | 2.38E-13 | AAEL010906-PA OS=Culex quinquefasciatus GN=CpipJ_CPIJ000938 PE=4 SV=1 |
| CCG001759.1 | 2235  | 478   | 1740 | 9.18994772 | 27.21583963 | 1.566317987  | Up   | 5.04E-13 | 1.31E-12 | AAEL004520-PA OS=Aedes aegypti GN=AAEL004520 PE=4 SV=1                |
| CCG007419.1 | 2704  | 565   | 1741 | 8.97851333 | 22.50826918 | 1.325906634  | Up   | 4.06E-13 | 1.08E-12 | AAEL004110-PA OS=Aedes aegypti GN=AAEL004110 PE=4 SV=1                |
| CCG016698.1 | 1296  | 89    | 1742 | 2.95085369 | 46.9886714  | 3.993108681  | Up   | 0        | 0        | AAEL009227-PA OS=Aedes aegypti GN=AAEL009227 PE=3 SV=1                |
| CCG008381.1 | 1320  | 430   | 1742 | 13.9977166 | 46.13433192 | 1.720649263  | Up   | 6.22E-13 | 1.59E-12 | AAEL012752-PA OS=Aedes aegypti GN=AAEL012752 PE=4 SV=1                |
| CCG015037.2 | 10342 | 428   | 1743 | 1.77828722 | 5.89173046  | 1.728203072  | Up   | 1.52E-13 | 4.51E-13 | -                                                                     |
| CCG003851.1 | 1209  | 288   | 1745 | 10.2359666 | 50.45673529 | 2.301399523  | Up   | 0        | 0        | AAEL006836-PA OS=Aedes aegypti GN=AAEL006836 PE=2 SV=1                |

|             |       |       |      |            |             |              |      |           |           |                                                                                          |
|-------------|-------|-------|------|------------|-------------|--------------|------|-----------|-----------|------------------------------------------------------------------------------------------|
| CCG001220.1 | 11940 | 3513  | 1746 | 12.6426028 | 5.111989216 | -1.306336814 | Down | 4.47E-225 | 2.71E-224 | Putative uncharacterized protein OS=Culex quinquefasciatus GN=CpipJ_CPIJ009271 PE=4 SV=1 |
| CCG000794.1 | 1598  | 617   | 1747 | 16.5909426 | 38.21784075 | 1.203850418  | Up   | 4.51E-13  | 1.18E-12  | Malate dehydrogenase OS=Culex quinquefasciatus GN=CpipJ_CPIJ018614 PE=4 SV=1             |
| CCG023640.1 | 1568  | 3836  | 1748 | 105.122386 | 38.97134426 | -1.431584332 | Down | 1.62E-282 | 1.01E-281 | ATP synthase subunit gamma OS=Aedes aegypti GN=AAEL008848 PE=3 SV=1                      |
| CCG028282.1 | 2847  | 430   | 1749 | 6.4899845  | 21.47594874 | 1.726434928  | Up   | 6.22E-13  | 1.59E-12  | AAEL010111-PA OS=Aedes aegypti GN=AAEL010111 PE=4 SV=1                                   |
| CCG022187.1 | 3559  | 686   | 1749 | 8.28244955 | 17.17955214 | 1.052563012  | Up   | 2.38E-13  | 6.73E-13  | AAEL009416-PA OS=Aedes aegypti GN=AAEL009416 PE=4 SV=1                                   |
| CCG011972.1 | 2028  | 14950 | 1749 | 316.764069 | 30.14892804 | -3.393230086 | Down | 0         | 0         | AAEL003425-PB (Fragment) OS=Aedes aegypti GN=AAEL003425 PE=4 SV=1                        |
| CCG027734.1 | 1713  | 298   | 1750 | 7.47517858 | 35.71335922 | 2.25628389   | Up   | 3.92E-13  | 1.05E-12  | AAEL009883-PA OS=Aedes aegypti GN=AAEL009883 PE=4 SV=1                                   |
| CCG027486.1 | 3855  | 438   | 1750 | 4.8821644  | 15.86951604 | 1.700665351  | Up   | 4.14E-13  | 1.10E-12  | AAEL000212-PA OS=Aedes aegypti GN=AAEL000212 PE=4 SV=1                                   |
| CCG019420.2 | 2106  | 311   | 1752 | 6.34548313 | 29.0820992  | 2.196329493  | Up   | 0         | 0         | Kar OS=Culex quinquefasciatus GN=CpipJ_CPIJ004499 PE=3 SV=1                              |
| CCG011135.1 | 1761  | 349   | 1754 | 8.5158645  | 34.81931713 | 2.03166301   | Up   | 4.55E-14  | 1.54E-13  | Lysine--tRNA ligase OS=Aedes aegypti GN=AAEL014702 PE=3 SV=1                             |
| CCG016409.1 | 1401  | 414   | 1755 | 12.6976946 | 43.79141737 | 1.786081562  | Up   | 8.70E-13  | 2.17E-12  | AGAP009746-PA OS=Anopheles gambiae GN=AGAP009746 PE=4 SV=2                               |
| CCG020870.1 | 1650  | 230   | 1756 | 5.98972058 | 37.20408122 | 2.634900282  | Up   | 3.85E-13  | 1.03E-12  | AAEL000170-PA OS=Aedes aegypti GN=AAEL000170 PE=4 SV=1                                   |
| CCG016805.1 | 4626  | 296   | 1756 | 2.74946854 | 13.26993818 | 2.270936968  | Up   | 2.26E-13  | 6.47E-13  | AAEL007447-PA OS=Aedes aegypti GN=AAEL007447 PE=4 SV=2                                   |
| CCG014301.3 | 4932  | 356   | 1759 | 3.10162723 | 12.467885   | 2.00711954   | Up   | 7.93E-13  | 1.99E-12  | AAEL006529-PA OS=Aedes aegypti GN=AAEL006529 PE=4 SV=2                                   |
| CCG026122.1 | 485   | 5     | 1760 | 0.44298695 | 126.8589013 | 8.161744822  | Up   | 1.59E-05  | 2.76E-05  | -                                                                                        |

|             |      |       |      |            |             |              |      |          |          |                                                                                                   |
|-------------|------|-------|------|------------|-------------|--------------|------|----------|----------|---------------------------------------------------------------------------------------------------|
| CCG020285.1 | 1860 | 460   | 1763 | 10.6269236 | 33.13518384 | 1.640639912  | Up   | 0        | 0        | Putative uncharacterized protein<br>OS=Culex quinquefasciatus<br>GN=CpipJ_CPIJ009258 PE=4<br>SV=1 |
| CCG020231.1 | 1359 | 254   | 1764 | 8.03113509 | 45.37630627 | 2.498263363  | Up   | 2.35E-13 | 6.67E-13 | AAEL000424-PA OS=Aedes<br>aegypti GN=AAEL000424 PE=3<br>SV=1                                      |
| CCG024654.1 | 2334 | 275   | 1764 | 5.06284362 | 26.42090841 | 2.383660241  | Up   | 4.31E-13 | 1.14E-12 | AAEL010336-PA OS=Aedes<br>aegypti GN=AAEL010336 PE=4<br>SV=1                                      |
| CCG017516.1 | 933  | 11203 | 1765 | 515.959203 | 66.13221705 | -2.963831824 | Down | 0        | 0        | AAEL001022-PA OS=Aedes<br>aegypti GN=AAEL001022 PE=4<br>SV=1                                      |
| CCG019274.1 | 327  | 13895 | 1765 | 1825.88521 | 188.6891697 | -3.274512542 | Down | 0        | 0        | AAEL004457-PA OS=Aedes<br>aegypti GN=AAEL004457 PE=3<br>SV=1                                      |
| CCG014340.1 | 2691 | 136   | 1766 | 2.17164025 | 22.94177509 | 3.40111999   | Up   | 1.70E-13 | 4.99E-13 | Unif OS=Culex quinquefasciatus<br>GN=CpipJ_CPIJ006150 PE=4<br>SV=1                                |
| CCG001257.1 | 4474 | 415   | 1766 | 3.98579344 | 13.79890853 | 1.791615305  | Up   | 0        | 0        | AAEL008683-PA OS=Aedes<br>aegypti GN=AAEL008683 PE=4<br>SV=1                                      |
| CCG015711.1 | 2891 | 110   | 1767 | 1.6349605  | 21.36675028 | 3.708039815  | Up   | 0        | 0        | AAEL007007-PA OS=Aedes<br>aegypti GN=AAEL007007 PE=3<br>SV=1                                      |
| CCG023534.1 | 3051 | 368   | 1767 | 5.18284573 | 20.24623896 | 1.965837572  | Up   | 3.69E-13 | 9.90E-13 | AAEL014249-PA OS=Aedes<br>aegypti GN=AAEL014249 PE=4<br>SV=1                                      |
| CCG017958.1 | 3621 | 225   | 1768 | 2.67003322 | 17.06882997 | 2.676434572  | Up   | 0        | 0        | AAEL010795-PA OS=Aedes<br>aegypti GN=AAEL010795 PE=4<br>SV=1                                      |
| CCG002173.1 | 832  | 187   | 1769 | 9.65786102 | 74.3283553  | 2.944137077  | Up   | 3.31E-13 | 9.03E-13 | -                                                                                                 |
| CCG016886.1 | 531  | 438   | 1769 | 35.4439619 | 116.4617544 | 1.716244477  | Up   | 4.14E-13 | 1.10E-12 | AAEL015613-PA OS=Aedes<br>aegypti GN=AAEL015613 PE=4<br>SV=1                                      |
| CCG005849.1 | 2787 | 179   | 1770 | 2.75980714 | 22.2017043  | 3.008031072  | Up   | 0        | 0        | Uncharacterized protein<br>OS=Anopheles darlingi<br>GN=AND_12961 PE=4 SV=1                        |
| CCG013386.1 | 1850 | 659   | 1770 | 15.3065163 | 33.44656751 | 1.127712194  | Up   | 0        | 0        | -                                                                                                 |
| CCG021042.1 | 1706 | 321   | 1771 | 8.08516108 | 36.29021581 | 2.166232213  | Up   | 0        | 0        | AAEL001971-PA OS=Aedes<br>aegypti GN=AAEL001971 PE=4<br>SV=1                                      |
| CCG019820.1 | 3756 | 577   | 1771 | 6.60104816 | 16.48325563 | 1.320234192  | Up   | 4.04E-13 | 1.07E-12 | AAEL009294-PA OS=Aedes<br>aegypti GN=AAEL009294 PE=4<br>SV=1                                      |
| CCG017877.1 | 639  | 6     | 1774 | 0.40347169 | 97.05161658 | 7.910140997  | Up   | 8.38E-06 | 1.48E-05 | -                                                                                                 |
| CCG014350.1 | 2031 | 488   | 1774 | 10.3245842 | 30.53470359 | 1.564366161  | Up   | 9.43E-13 | 2.34E-12 | AAEL012446-PA OS=Aedes<br>aegypti GN=IAP6 PE=4 SV=2                                               |

|             |      |     |      |            |             |             |    |          |          |                                                                                                    |
|-------------|------|-----|------|------------|-------------|-------------|----|----------|----------|----------------------------------------------------------------------------------------------------|
| CCG008229.1 | 1464 | 45  | 1775 | 1.32079102 | 42.38452273 | 5.004063417 | Up | 0        | 0        | AAEL003156-PA OS=Aedes aegypti GN=AAEL003156 PE=4 SV=1                                             |
| CCG003486.1 | 2604 | 77  | 1775 | 1.27061043 | 23.82908651 | 4.229129972 | Up | 0        | 0        | AAEL004075-PA OS=Aedes aegypti GN=AAEL004075 PE=4 SV=1                                             |
| CCG022217.1 | 2325 | 475 | 1775 | 8.77876299 | 26.68857689 | 1.60413281  | Up | 6.44E-13 | 1.64E-12 | AAEL014992-PA (Fragment) OS=Aedes aegypti GN=AAEL014992 PE=4 SV=1                                  |
| CCG022190.1 | 2213 | 272 | 1776 | 5.28141338 | 28.05508339 | 2.409266229 | Up | 5.36E-13 | 1.38E-12 | AAEL007869-PA OS=Aedes aegypti GN=AAEL007869 PE=4 SV=1                                             |
| CCG028366.1 | 3838 | 317 | 1776 | 3.5490896  | 16.17662833 | 2.18839004  | Up | 2.22E-13 | 6.35E-13 | AAEL004918-PA OS=Aedes aegypti GN=AAEL004918 PE=4 SV=1                                             |
| CCG019283.1 | 6000 | 497 | 1776 | 3.55932635 | 10.34764992 | 1.539627029 | Up | 7.04E-14 | 2.29E-13 | AAEL001647-PA (Fragment) OS=Aedes aegypti GN=AAEL001647 PE=4 SV=1                                  |
| CCG012358.1 | 1212 | 537 | 1776 | 19.0385705 | 51.22598973 | 1.427950792 | Up | 3.67E-13 | 9.84E-13 | Forkhead box subgroup O OS=Aedes aegypti GN=FoxO PE=2 SV=1                                         |
| CCG003518.3 | 2679 | 209 | 1779 | 3.3522488  | 23.21417483 | 2.791804867 | Up | 0        | 0        | DNA mismatch repair protein spellchecker 1 OS=Culex quinquefasciatus GN=CpipJ_CPIJ017719 PE=3 SV=1 |
| CCG010179.1 | 1315 | 260 | 1779 | 8.49591711 | 47.29336455 | 2.476796186 | Up | 3.22E-13 | 8.81E-13 | AAEL006458-PA OS=Aedes aegypti GN=AAEL006458 PE=3 SV=1                                             |
| CCG016012.1 | 1314 | 98  | 1780 | 3.20474429 | 47.35596092 | 3.885264886 | Up | 0        | 0        | Salivary serpin putative anticoagulant OS=Aedes albopictus PE=2 SV=1                               |
| CCG005133.1 | 2651 | 258 | 1780 | 4.18189043 | 23.47255098 | 2.488747474 | Up | 1.69E-13 | 4.97E-13 | AAEL006317-PA OS=Aedes aegypti GN=AAEL006317 PE=4 SV=1                                             |
| CCG003248.1 | 1413 | 555 | 1780 | 16.8777089 | 44.03802736 | 1.383630768 | Up | 0        | 0        | AAEL006449-PA OS=Aedes aegypti GN=AAEL006449 PE=4 SV=1                                             |



|             |       |      |      |            |             |              |      |           |           |                                                                                                                                          |
|-------------|-------|------|------|------------|-------------|--------------|------|-----------|-----------|------------------------------------------------------------------------------------------------------------------------------------------|
| CCG027197.1 | 369   | 5    | 1782 | 0.58224573 | 168.8228976 | 8.17966673   | Up   | 1.59E-05  | 2.76E-05  | Chromosome undetermined<br>SCAF14565, whole genome<br>shotgun sequence OS=Tetraodon<br>nigroviridis<br>GN=GSTENG00016696001 PE=3<br>SV=1 |
| CCG002656.1 | 2261  | 220  | 1783 | 4.1810445  | 27.56771671 | 2.721044478  | Up   | 4.61E-13  | 1.20E-12  | AAEL009486-PA OS=Aedes<br>aegypti GN=AAEL009486 PE=4<br>SV=1                                                                             |
| CCG005081.1 | 2637  | 376  | 1783 | 6.12689428 | 23.63693875 | 1.94781534   | Up   | 3.71E-14  | 1.28E-13  | AAEL014423-PA (Fragment)<br>OS=Aedes aegypti<br>GN=AAEL014423 PE=4 SV=1                                                                  |
| CCG022352.1 | 2839  | 501  | 1783 | 7.58289434 | 21.95512768 | 1.533737398  | Up   | 0         | 0         | AAEL001472-PA OS=Aedes<br>aegypti GN=AAEL001472 PE=3<br>SV=1                                                                             |
| CCG026883.1 | 2490  | 642  | 1783 | 11.0789436 | 25.03237248 | 1.175974704  | Up   | 0         | 0         | AAEL006155-PA OS=Aedes<br>aegypti GN=AAEL006155 PE=4<br>SV=1                                                                             |
| CCG013811.1 | 2061  | 725  | 1783 | 15.1155059 | 30.24289543 | 1.000567007  | Up   | 0         | 0         | AAEL012307-PA OS=Aedes<br>aegypti GN=AAEL012307 PE=4<br>SV=1                                                                             |
| CCG019325.1 | 1303  | 85   | 1784 | 2.8030909  | 47.86305891 | 4.093822168  | Up   | 0         | 0         | Gag-like protein OS=Aedes<br>aegypti PE=4 SV=1                                                                                           |
| CCG013830.1 | 816   | 7133 | 1785 | 375.616565 | 76.47123044 | -2.296271695 | Down | 0         | 0         | mitochondrial cytochrome c1<br>OS=Culex quinquefasciatus<br>GN=CpipJ_CPIJ014410 PE=4<br>SV=1                                             |
| CCG009823.1 | 10263 | 721  | 1786 | 3.01872539 | 6.083550844 | 1.01097412   | Up   | 0         | 0         | AAEL007594-PA OS=Aedes<br>aegypti GN=AAEL007594 PE=3<br>SV=1                                                                             |
| CCG022420.1 | 3864  | 415  | 1787 | 4.61502067 | 16.16729829 | 1.808669597  | Up   | 0         | 0         | Alto guanine nucleotide exchange<br>factor OS=Culex quinquefasciatus<br>GN=CpipJ_CPIJ015585 PE=4<br>SV=1                                 |
| CCG009798.1 | 6454  | 3556 | 1787 | 23.6752985 | 9.679336937 | -1.290402486 | Down | 1.65E-223 | 9.98E-223 | Growth factor receptor-bound<br>protein OS=Culex<br>quinquefasciatus<br>GN=CpipJ_CPIJ002888 PE=4<br>SV=1                                 |
| CCG018536.1 | 1587  | 388  | 1788 | 10.505518  | 39.38588461 | 1.906531383  | Up   | 3.43E-13  | 9.27E-13  | Dolichyl-diphosphooligosaccharide<br>protein glycotransferase<br>OS=Aedes aegypti PE=2 SV=1                                              |
| CCG000120.1 | 26358 | 4102 | 1792 | 6.68722404 | 2.376706578 | -1.492443651 | Down | 0         | 0         | AAEL006530-PA OS=Aedes<br>aegypti GN=AAEL006530 PE=4<br>SV=1                                                                             |

|             |      |      |      |            |             |              |      |          |          |                                                                                          |
|-------------|------|------|------|------------|-------------|--------------|------|----------|----------|------------------------------------------------------------------------------------------|
| CCG028294.1 | 1881 | 595  | 1793 | 13.592234  | 33.32280184 | 1.293727118  | Up   | 7.20E-13 | 1.81E-12 | AAEL009890-PA OS=Aedes aegypti GN=AAEL009890 PE=4 SV=1                                   |
| CCG003328.1 | 1769 | 179  | 1795 | 4.34798332 | 35.47207847 | 3.028265555  | Up   | 0        | 0        | AAEL010525-PA OS=Aedes aegypti GN=AAEL010525 PE=4 SV=1                                   |
| CCG006804.1 | 2280 | 204  | 1797 | 3.84466047 | 27.55264182 | 2.841262555  | Up   | 6.59E-14 | 2.17E-13 | AGAP001909-PA OS=Anopheles gambiae GN=AgaP_AGAP001909 PE=4 SV=5                          |
| CCG023205.1 | 2853 | 240  | 1797 | 3.61469902 | 22.01893563 | 2.606797302  | Up   | 0        | 0        | AAEL003572-PA OS=Aedes aegypti GN=AAEL003572 PE=4 SV=1                                   |
| CCG001308.1 | 9346 | 257  | 1798 | 1.18159874 | 6.725335078 | 2.50886596   | Up   | 4.14E-13 | 1.10E-12 | TXR1 DNA-binding protein 45 OS=Culex quinquefasciatus GN=CpipJ_CPIJ014288 PE=4 SV=1      |
| CCG002092.1 | 2727 | 273  | 1798 | 4.3017006  | 23.04913151 | 2.421733368  | Up   | 1.53E-14 | 5.42E-14 | AAEL014827-PA OS=Aedes aegypti GN=AAEL014827 PE=4 SV=1                                   |
| CCG006233.1 | 1290 | 191  | 1799 | 6.36218551 | 48.75189141 | 2.937863847  | Up   | 6.68E-14 | 2.19E-13 | AAEL009913-PA OS=Aedes aegypti GN=AAEL009913 PE=4 SV=1                                   |
| CCG018240.2 | 4537 | 299  | 1800 | 2.83181632 | 13.86927445 | 2.292092721  | Up   | 4.80E-13 | 1.25E-12 | AAEL001387-PA OS=Aedes aegypti GN=AAEL001387 PE=4 SV=1                                   |
| CCG010208.1 | 5885 | 303  | 1800 | 2.21237546 | 10.6924211  | 2.272920412  | Up   | 1.37E-13 | 4.14E-13 | AAEL001719-PA OS=Aedes aegypti GN=AAEL001719 PE=4 SV=1                                   |
| CCG022477.1 | 1598 | 450  | 1800 | 12.1003633 | 39.37728297 | 1.702313204  | Up   | 9.36E-13 | 2.32E-12 | AGAP008634-PA (Fragment) OS=Anopheles gambiae GN=AGAP008634 PE=4 SV=4                    |
| CCG006212.1 | 4737 | 106  | 1801 | 0.96153512 | 13.29108222 | 3.788975215  | Up   | 0        | 0        | AAEL013242-PA OS=Aedes aegypti GN=AAEL013242 PE=4 SV=1                                   |
| CCG002729.1 | 822  | 625  | 1801 | 32.6716352 | 76.59349935 | 1.22918329   | Up   | 0        | 0        | AAEL004515-PA OS=Aedes aegypti GN=AAEL004515 PE=4 SV=1                                   |
| CCG015777.1 | 1989 | 221  | 1805 | 4.77441496 | 31.72432859 | 2.732193766  | Up   | 0        | 0        | Putative uncharacterized protein OS=Culex quinquefasciatus GN=CpipJ_CPIJ006272 PE=4 SV=1 |
| CCG024898.1 | 4590 | 5539 | 1805 | 51.8538911 | 13.74720906 | -1.915313498 | Down | 0        | 0        | AAEL013600-PA (Fragment) OS=Aedes aegypti GN=AAEL013600 PE=3 SV=1                        |
| CCG019294.1 | 1740 | 111  | 1806 | 2.74117273 | 36.28428037 | 3.726479515  | Up   | 0        | 0        | Strain OS=Culex quinquefasciatus GN=CpipJ_CPIJ013090 PE=4 SV=1                           |

|             |       |      |      |            |             |              |      |          |          |                                                                                                   |
|-------------|-------|------|------|------------|-------------|--------------|------|----------|----------|---------------------------------------------------------------------------------------------------|
| CCG014528.1 | 1665  | 209  | 1808 | 5.39379852 | 37.96069934 | 2.815133034  | Up   | 0        | 0        | Arginine N-methyltransferase<br>OS=Culex quinquefasciatus<br>GN=CpipJ_CPIJ009499 PE=4<br>SV=1     |
| CCG000744.1 | 2121  | 372  | 1808 | 7.53641739 | 29.79941745 | 1.983333355  | Up   | 1.17E-13 | 3.60E-13 | Putative uncharacterized protein<br>OS=Tribolium castaneum<br>GN=TcasGA2_TC003691 PE=4<br>SV=1    |
| CCG003639.1 | 2898  | 8809 | 1808 | 130.614352 | 21.80971857 | -2.582270372 | Down | 0        | 0        | AAEL002971-PA OS=Aedes<br>aegypti GN=AAEL002971 PE=4<br>SV=1                                      |
| CCG027154.1 | 1613  | 157  | 1809 | 4.18242302 | 39.20615169 | 3.228669148  | Up   | 0        | 0        | AAEL001626-PA OS=Aedes<br>aegypti GN=AAEL001626 PE=4<br>SV=1                                      |
| CCG000148.1 | 544   | 7309 | 1809 | 577.32682  | 116.2491226 | -2.312168422 | Down | 0        | 0        | AAEL009964-PA OS=Aedes<br>aegypti GN=AAEL009964 PE=4<br>SV=1                                      |
| CCG003210.1 | 1599  | 329  | 1810 | 8.84117742 | 39.57128265 | 2.162143412  | Up   | 0        | 0        | T-complex protein 1 subunit alpha<br>OS=Aedes aegypti<br>GN=AAEL009320 PE=3 SV=1                  |
| CCG006791.1 | 30382 | 517  | 1810 | 0.73120113 | 2.082630536 | 1.510066715  | Up   | 8.39E-14 | 2.69E-13 | AAEL001869-PA OS=Aedes<br>aegypti GN=AAEL001869 PE=4<br>SV=1                                      |
| CCG020926.1 | 2581  | 143  | 1811 | 2.38073307 | 24.52903496 | 3.365012698  | Up   | 0        | 0        | Putative uncharacterized protein<br>OS=Culex quinquefasciatus<br>GN=CpipJ_CPIJ000595 PE=4<br>SV=1 |
| CCG023619.1 | 2854  | 380  | 1811 | 5.7212681  | 22.18270471 | 1.955028426  | Up   | 0        | 0        | Elongation factor 1-alpha<br>OS=Culex quinquefasciatus<br>GN=CpipJ_CPIJ002376 PE=4<br>SV=1        |
| CCG018046.1 | 1210  | 130  | 1813 | 4.61658306 | 52.37963288 | 3.504108601  | Up   | 0        | 0        | AAEL012185-PA OS=Aedes<br>aegypti GN=AAEL012185 PE=2<br>SV=1                                      |
| CCG018640.1 | 1220  | 211  | 1814 | 7.43165082 | 51.97894595 | 2.806172756  | Up   | 1.30E-13 | 3.97E-13 | AAEL004532-PA OS=Aedes<br>aegypti GN=AAEL004532 PE=3<br>SV=1                                      |
| CCG022470.1 | 780   | 479  | 1814 | 26.3878242 | 81.30040265 | 1.623390099  | Up   | 0        | 0        | AAEL006931-PA OS=Aedes<br>aegypti GN=AAEL006931 PE=4<br>SV=1                                      |
| CCG002497.1 | 15369 | 707  | 1815 | 1.97668048 | 4.128393021 | 1.062500632  | Up   | 0        | 0        | AAEL013105-PA OS=Aedes<br>aegypti GN=AAEL013105 PE=1<br>SV=1                                      |
| CCG015852.1 | 1371  | 144  | 1817 | 4.51323252 | 46.33055353 | 3.359730907  | Up   | 7.53E-14 | 2.44E-13 | AAEL000436-PA OS=Aedes<br>aegypti GN=AAEL000436 PE=4<br>SV=1                                      |

|             |       |      |      |            |             |              |      |           |            |                                                                                          |
|-------------|-------|------|------|------------|-------------|--------------|------|-----------|------------|------------------------------------------------------------------------------------------|
| CCG021545.1 | 1639  | 2    | 1818 | 0.05243409 | 38.77617277 | 9.530449688  | Up   | 9.36E-05  | 0.00015375 | AAEL002638-PA OS=Aedes aegypti GN=CYP9J6 PE=3 SV=1                                       |
| CCG013603.1 | 2313  | 204  | 1818 | 3.78980798 | 27.47693349 | 2.858024346  | Up   | 6.59E-14  | 2.17E-13   | AAEL007904-PA OS=Aedes aegypti GN=AAEL007904 PE=4 SV=1                                   |
| CCG024875.1 | 2932  | 139  | 1819 | 2.03710543 | 21.68796229 | 3.412301959  | Up   | 1.46E-13  | 4.37E-13   | AAEL004869-PA (Fragment) OS=Aedes aegypti GN=AAEL004869 PE=4 SV=1                        |
| CCG023099.1 | 1791  | 4536 | 1820 | 108.827871 | 35.52432369 | -1.615168986 | Down | 0         | 0          | AAEL001479-PA OS=Aedes aegypti GN=AAEL001479 PE=3 SV=1                                   |
| CCG023751.1 | 576   | 5443 | 1820 | 406.049072 | 110.458444  | -1.878150382 | Down | 0         | 0          | AAEL009257-PA OS=Aedes aegypti GN=AAEL009257 PE=4 SV=1                                   |
| CCG009138.1 | 2790  | 119  | 1821 | 1.83275929 | 22.81685376 | 3.638010647  | Up   | 0         | 0          | AGAP003524-PA OS=Anopheles gambiae GN=AgaP_AGAP003524 PE=4 SV=5                          |
| CCG003615.1 | 1476  | 228  | 1822 | 6.63760128 | 43.15310317 | 2.700730433  | Up   | 1.05E-13  | 3.28E-13   | AAEL006783-PA OS=Aedes aegypti GN=AAEL006783 PE=4 SV=1                                   |
| CCG027323.1 | 2223  | 404  | 1822 | 7.80916454 | 28.65226283 | 1.875408965  | Up   | 1.18E-13  | 3.64E-13   | AAEL006734-PA OS=Aedes aegypti GN=AAEL006734 PE=3 SV=1                                   |
| CCG013139.1 | 2235  | 513  | 1823 | 9.86285184 | 28.51406647 | 1.531597034  | Up   | 0         | 0          | AAEL004520-PA OS=Aedes aegypti GN=AAEL004520 PE=4 SV=1                                   |
| CCG015611.1 | 3381  | 288  | 1825 | 3.66024359 | 18.86981813 | 2.366068951  | Up   | 0         | 0          | AAEL009447-PA OS=Aedes aegypti GN=AAEL009447 PE=4 SV=1                                   |
| CCG001103.1 | 984   | 284  | 1827 | 12.401834  | 64.90728828 | 2.387827003  | Up   | 0         | 0          | Putative uncharacterized protein OS=Culex quinquefasciatus GN=CpipJ_CPIJ003570 PE=4 SV=1 |
| CCG022490.1 | 24615 | 555  | 1827 | 0.96884837 | 2.594709391 | 1.421230161  | Up   | 0         | 0          | AAEL011664-PA OS=Aedes aegypti GN=AAEL011664 PE=4 SV=1                                   |
| CCG016118.1 | 2535  | 3204 | 1827 | 54.3096764 | 25.19478172 | -1.10808431  | Down | 1.94E-158 | 1.11E-157  | AAEL000485-PA OS=Aedes aegypti GN=AAEL000485 PE=4 SV=1                                   |
| CCG024588.1 | 2601  | 535  | 1828 | 8.83844983 | 24.56890809 | 1.474968478  | Up   | 2.42E-14  | 8.43E-14   | Uncharacterized protein OS=Anopheles darlingi GN=AND_11405 PE=3 SV=1                     |
| CCG004454.1 | 2524  | 691  | 1829 | 11.7639012 | 25.33228535 | 1.106610663  | Up   | 2.46E-12  | 5.81E-12   | AAEL002386-PA OS=Aedes aegypti GN=AAEL002386 PE=4 SV=1                                   |

|             |      |     |      |            |             |             |    |          |          |                                                                                                        |
|-------------|------|-----|------|------------|-------------|-------------|----|----------|----------|--------------------------------------------------------------------------------------------------------|
| CCG021323.2 | 8572 | 713 | 1831 | 3.57412748 | 7.467172745 | 1.062971013 | Up | 8.97E-14 | 2.84E-13 | Putative uncharacterized protein<br>OS=Culex quinquefasciatus<br>GN=CpipJ_CPIJ017756 PE=4<br>SV=1      |
| CCG006079.1 | 435  | 338 | 1832 | 33.3879777 | 147.2265817 | 2.140637556 | Up | 1.44E-13 | 4.32E-13 | AAEL005270-PA OS=Aedes<br>aegypti GN=AAEL005270 PE=2<br>SV=1                                           |
| CCG001481.1 | 1878 | 693 | 1834 | 15.8562439 | 34.13923301 | 1.106379585 | Up | 1.99E-12 | 4.75E-12 | Syntaxin-5 OS=Culex<br>quinquefasciatus<br>GN=CpipJ_CPIJ003088 PE=3<br>SV=1                            |
| CCG005546.1 | 2730 | 483 | 1835 | 7.60233766 | 23.49759629 | 1.627998173 | Up | 0        | 0        | AAEL013334-PA OS=Aedes<br>aegypti GN=AAEL013334 PE=4<br>SV=1                                           |
| CCG005819.1 | 1667 | 663 | 1835 | 17.0899424 | 38.48136645 | 1.171012491 | Up | 1.08E-13 | 3.38E-13 | Autophagy-related protein 3<br>OS=Aedes aegypti<br>GN=AAEL000955 PE=3 SV=1                             |
| CCG003350.1 | 1393 | 277 | 1839 | 8.54459188 | 46.1509483  | 2.433276802 | Up | 0        | 0        | AAEL005579-PA OS=Aedes<br>aegypti GN=AAEL005579 PE=4<br>SV=1                                           |
| CCG024460.2 | 4491 | 344 | 1839 | 3.29138025 | 14.31491227 | 2.120754214 | Up | 4.69E-13 | 1.22E-12 | Flt-1 mRNA-splicing peccase BKRZ<br>OS=Culex quinquefasciatus<br>GN=CpipJ_CPIJ013139 PE=4<br>SV=1      |
| CCG024437.1 | 2172 | 405 | 1840 | 8.01231239 | 29.61474644 | 1.886025157 | Up | 2.34E-13 | 6.64E-13 | AAEL013022-PA OS=Aedes<br>aegypti GN=AAEL013022 PE=4<br>SV=1                                           |
| CCG023358.1 | 3699 | 743 | 1840 | 8.63111998 | 17.38935638 | 1.010584854 | Up | 0        | 0        | AAEL000264-PA OS=Aedes<br>aegypti GN=AAEL000264 PE=4<br>SV=1                                           |
| CCG016327.2 | 1614 | 159 | 1843 | 4.23307794 | 39.91828011 | 3.237270604 | Up | 5.53E-14 | 1.84E-13 | AAEL000262-PA OS=Aedes<br>aegypti GN=AAEL000262 PE=4<br>SV=1                                           |
| CCG025307.1 | 1611 | 424 | 1844 | 11.3092287 | 40.01431556 | 1.82301569  | Up | 0        | 0        | S-hydroxyisobutyrate<br>dehydrogenase OS=Culex<br>quinquefasciatus<br>GN=CpipJ_CPIJ000400 PE=4<br>SV=1 |
| CCG001067.1 | 4809 | 437 | 1844 | 3.90471491 | 13.4046709  | 1.779446675 | Up | 5.07E-13 | 1.31E-12 | AAEL012168-PA OS=Aedes<br>aegypti GN=AAEL012168 PE=4<br>SV=1                                           |
| CCG000852.1 | 2709 | 680 | 1844 | 10.7860537 | 23.79588866 | 1.141545208 | Up | 4.12E-13 | 1.09E-12 | AAEL011545-PA (Fragment)<br>OS=Aedes aegypti<br>GN=AAEL011545 PE=4 SV=1                                |
| CCG026831.1 | 357  | 650 | 1845 | 78.2362115 | 180.6667245 | 1.207422397 | Up | 0        | 0        | AAEL002263-PA OS=Aedes<br>aegypti GN=AAEL002263 PE=4<br>SV=1                                           |

|             |       |      |      |            |             |              |      |          |          |                                                                                          |
|-------------|-------|------|------|------------|-------------|--------------|------|----------|----------|------------------------------------------------------------------------------------------|
| CCG007220.1 | 1881  | 239  | 1846 | 5.45973768 | 34.30780379 | 2.651633233  | Up   | 6.72E-13 | 1.70E-12 | AAEL005074-PA OS=Aedes aegypti GN=AAEL005074 PE=4 SV=1                                   |
| CCG022469.1 | 246   | 286  | 1847 | 49.9566833 | 262.4712894 | 2.393410018  | Up   | 0        | 0        | AAEL006931-PA OS=Aedes aegypti GN=AAEL006931 PE=4 SV=1                                   |
| CCG021919.1 | 4323  | 552  | 1847 | 5.48676695 | 14.9359096  | 1.444756898  | Up   | 0        | 0        | AAEL001742-PA OS=Aedes aegypti GN=AAEL001742 PE=4 SV=1                                   |
| CCG013503.1 | 2366  | 729  | 1848 | 13.2396181 | 27.30468955 | 1.044287241  | Up   | 4.15E-13 | 1.10E-12 | AAEL012510-PA OS=Aedes aegypti GN=IKK2 PE=4 SV=1                                         |
| CCG007303.1 | 1842  | 27   | 1849 | 0.62984953 | 35.09112582 | 5.799955211  | Up   | 2.28E-12 | 5.40E-12 | AAEL004948-PA OS=Aedes aegypti GN=AAEL004948 PE=3 SV=1                                   |
| CCG026786.3 | 909   | 7327 | 1849 | 346.357806 | 71.10875    | -2.284164187 | Down | 0        | 0        | Putative uncharacterized protein OS=Culex quinquefasciatus GN=CpipJ_CPIJ010605 PE=4 SV=1 |
| CCG018184.1 | 1326  | 348  | 1850 | 11.2771249 | 48.77285975 | 2.112679263  | Up   | 0        | 0        | AAEL013248-PA OS=Aedes aegypti GN=AAEL013248 PE=3 SV=1                                   |
| CCG022742.2 | 3077  | 514  | 1852 | 7.17791472 | 21.04086077 | 1.551557038  | Up   | 1.57E-13 | 4.65E-13 | Ubiquitin carboxyl-terminal hydrolase OS=Aedes aegypti GN=AAEL012219 PE=3 SV=1           |
| CCG024673.1 | 3783  | 452  | 1853 | 5.13410522 | 17.12336422 | 1.737781407  | Up   | 1.12E-13 | 3.49E-13 | AAEL007312-PA OS=Aedes aegypti GN=AAEL007312 PE=4 SV=1                                   |
| CCG021661.1 | 2761  | 482  | 1856 | 7.50141691 | 23.49966016 | 1.647404863  | Up   | 0        | 0        | AAEL012137-PA OS=Aedes aegypti GN=AAEL012137 PE=4 SV=1                                   |
| CCG005047.1 | 738   | 522  | 1859 | 30.3932269 | 88.05885707 | 1.534718262  | Up   | 0        | 0        | AAEL013854-PA (Fragment) OS=Aedes aegypti GN=AAEL013854 PE=3 SV=1                        |
| CCG013617.1 | 378   | 409  | 1861 | 46.4937076 | 172.1093997 | 1.888218511  | Up   | 3.15E-13 | 8.65E-13 | Histone H2A OS=Anopheles gambiae GN=AGAP000306 PE=3 SV=3                                 |
| CCG027188.1 | 12676 | 545  | 1861 | 1.84746808 | 5.132325108 | 1.474063124  | Up   | 0        | 0        | AAEL005388-PA OS=Aedes aegypti GN=AAEL005388 PE=4 SV=1                                   |
| CCG028056.1 | 3141  | 426  | 1863 | 5.82779591 | 20.73456531 | 1.831015543  | Up   | 4.37E-13 | 1.15E-12 | AAEL001742-PA OS=Aedes aegypti GN=AAEL001742 PE=4 SV=1                                   |
| CCG005326.1 | 3893  | 658  | 1865 | 7.26280128 | 16.74728646 | 1.205329345  | Up   | 1.34E-12 | 3.25E-12 | AAEL010520-PA OS=Aedes aegypti GN=AAEL010520 PE=4 SV=1                                   |

|             |      |      |      |            |             |              |      |           |           |                                                                                                         |
|-------------|------|------|------|------------|-------------|--------------|------|-----------|-----------|---------------------------------------------------------------------------------------------------------|
| CCG015087.1 | 5764 | 3359 | 1865 | 25.040829  | 11.311101   | -1.146542961 | Down | 2.43E-175 | 1.42E-174 | AAEL007484-PA OS=Aedes aegypti GN=AAEL007484 PE=4 SV=1                                                  |
| CCG020927.1 | 2434 | 287  | 1866 | 5.06668604 | 26.80038803 | 2.403139548  | Up   | 2.87E-13  | 7.99E-13  | AAEL004083-PA OS=Aedes aegypti GN=AAEL004083 PE=4 SV=1                                                  |
| CCG005108.1 | 6381 | 626  | 1866 | 4.21549191 | 10.22287172 | 1.278027628  | Up   | 0         | 0         | AAEL006013-PA OS=Aedes aegypti GN=AAEL006013 PE=4 SV=1                                                  |
| CCG009900.1 | 1611 | 199  | 1867 | 5.30786914 | 40.51340952 | 2.932194796  | Up   | 0         | 0         | AAEL002978-PA OS=Aedes aegypti GN=AAEL002978 PE=4 SV=1                                                  |
| CCG005491.1 | 1737 | 52   | 1868 | 1.28637087 | 37.59473864 | 4.869152225  | Up   | 0         | 0         | AAEL013242-PA OS=Aedes aegypti GN=AAEL013242 PE=4 SV=1                                                  |
| CCG007732.3 | 2916 | 454  | 1868 | 6.69007528 | 22.39439678 | 1.743043456  | Up   | 3.16E-13  | 8.66E-13  | AAEL004791-PA OS=Aedes aegypti GN=AAEL004791 PE=4 SV=1                                                  |
| CCG010193.1 | 1629 | 314  | 1869 | 8.28268672 | 40.10866746 | 2.275743309  | Up   | 4.97E-14  | 1.68E-13  | AAEL001199-PA OS=Aedes aegypti GN=AAEL001199 PE=3 SV=1                                                  |
| CCG013616.1 | 1959 | 247  | 1870 | 5.41782769 | 33.37007533 | 2.622768527  | Up   | 0         | 0         | AAEL015216-PA OS=Aedes aegypti GN=AAEL015216 PE=3 SV=1                                                  |
| CCG017380.1 | 2205 | 85   | 1872 | 1.65642968 | 29.67886355 | 4.163286987  | Up   | 0         | 0         | AAEL002810-PA OS=Aedes aegypti GN=AAEL002810 PE=3 SV=1                                                  |
| CCG016733.1 | 1731 | 221  | 1872 | 5.4860262  | 37.80583138 | 2.784775364  | Up   | 0         | 0         | AAEL011061-PA OS=Aedes aegypti GN=AAEL011061 PE=4 SV=1                                                  |
| CCG015616.1 | 3060 | 317  | 1873 | 4.45143983 | 21.39766418 | 2.265109358  | Up   | 2.22E-13  | 6.35E-13  | AAEL007857-PA OS=Aedes aegypti GN=AAEL007857 PE=4 SV=1                                                  |
| CCG017608.1 | 3966 | 4694 | 1873 | 50.8572704 | 16.50954422 | -1.623153738 | Down | 0         | 0         | AAEL005384-PA OS=Aedes aegypti GN=AAEL005384 PE=4 SV=1                                                  |
| CCG016905.1 | 4635 | 604  | 1874 | 5.59950803 | 14.13415548 | 1.335813702  | Up   | 2.31E-13  | 6.59E-13  | AAEL005126-PA OS=Aedes aegypti GN=AAEL005126 PE=4 SV=1                                                  |
| CCG026531.1 | 6733 | 467  | 1876 | 2.98037518 | 9.740342674 | 1.708478577  | Up   | 5.22E-14  | 1.75E-13  | Transcription initiation factor TFIID subunit 1 OS=Culex quinquefasciatus GN=CpipJ_CPIJ003658 PE=4 SV=1 |
| CCG019437.1 | 2318 | 224  | 1877 | 4.1523816  | 28.30745708 | 2.769171217  | Up   | 2.04E-13  | 5.87E-13  | Purative uncharacterized protein OS=Culex quinquefasciatus GN=CpipJ_CPIJ014589 PE=4 SV=1                |
| CCG007362.1 | 1866 | 330  | 1878 | 7.59914921 | 35.18308884 | 2.210972337  | Up   | 1.76E-13  | 5.16E-13  | AAEL000575-PA OS=Aedes aegypti GN=AAEL000575 PE=3 SV=1                                                  |

|             |      |      |      |            |             |             |      |           |           |                                                                                 |
|-------------|------|------|------|------------|-------------|-------------|------|-----------|-----------|---------------------------------------------------------------------------------|
| CCG027189.2 | 7601 | 246  | 1879 | 1.39067948 | 8.641836871 | 2.63554805  | Up   | 2.51E-13  | 7.05E-13  | AAEL014900-PA OS=Aedes aegypti GN=AAEL014900 PE=4 SV=1                          |
| CCG018805.1 | 3335 | 390  | 1880 | 5.02494648 | 19.70661479 | 1.971499837 | Up   | 6.59E-13  | 1.67E-12  | AAEL012388-PA OS=Aedes aegypti GN=AAEL012388 PE=4 SV=1                          |
| CCG010694.1 | 1533 | 560  | 1880 | 15.6967067 | 42.871207   | 1.449547133 | Up   | 0         | 0         | AAEL009113-PA OS=Aedes aegypti GN=AAEL009113 PE=4 SV=1                          |
| CCG010977.1 | 1734 | 625  | 1880 | 15.4879378 | 37.90170723 | 1.291117771 | Up   | 0         | 0         | -                                                                               |
| CCG023355.1 | 1461 | 27   | 1881 | 0.79410187 | 45.00788406 | 5.824709835 | Up   | 2.28E-12  | 5.41E-12  | AAEL009330-PA OS=Aedes aegypti GN=AAEL009330 PE=4 SV=1                          |
| CCG025715.1 | 2277 | 686  | 1881 | 12.9456469 | 28.87857646 | 1.157532571 | Up   | 2.38E-13  | 6.73E-13  | AAEL014844-PA OS=Aedes aegypti GN=AAEL014844 PE=4 SV=1                          |
| CCG018767.1 | 2567 | 320  | 1883 | 5.35656996 | 25.64333275 | 2.259202394 | Up   | 0         | 0         | AAEL012830-PA OS=Aedes aegypti GN=AAEL012830 PE=2 SV=1                          |
| CCG005134.1 | 915  | 192  | 1884 | 9.01660005 | 71.97966496 | 2.996933953 | Up   | 0         | 0         | AAEL006317-PA OS=Aedes aegypti GN=AAEL006317 PE=4 SV=1                          |
| CCG013391.1 | 2052 | 86   | 1885 | 1.80087582 | 32.11323183 | 4.156397257 | Up   | 0         | 0         | AAEL010877-PA OS=Aedes aegypti GN=AAEL010877 PE=4 SV=1                          |
| CCG019811.1 | 2754 | 123  | 1889 | 1.91912758 | 23.97828062 | 3.643205685 | Up   | 0         | 0         | Zinc finger protein 467 OS=Culex quinquefasciatus GN=CpipJ_CPIJ001514 PE=4 SV=1 |
| CCG022123.1 | 2697 | 4091 | 1891 | 65.179527  | 24.51097567 | -1.41099097 | Down | 1.28E-294 | 8.05E-294 | AAEL003499-PA OS=Aedes aegypti GN=AAEL003499 PE=4 SV=1                          |
| CCG025758.1 | 961  | 110  | 1893 | 4.918492   | 68.86162116 | 3.807412186 | Up   | 0         | 0         | AAEL009773-PA OS=Aedes aegypti GN=AAEL009773 PE=4 SV=1                          |
| CCG009521.1 | 1824 | 114  | 1893 | 2.68560841 | 36.28071158 | 3.755881885 | Up   | 8.48E-14  | 2.70E-13  | AAEL009572-PA (Fragment) OS=Aedes aegypti GN=AAEL009572 PE=3 SV=1               |
| CCG015294.1 | 3527 | 539  | 1893 | 6.56668187 | 18.76269292 | 1.514630437 | Up   | 7.19E-13  | 1.81E-12  | AAEL004790-PA OS=Aedes aegypti GN=AAEL004790 PE=4 SV=1                          |
| CCG006188.1 | 2922 | 151  | 1895 | 2.22054412 | 22.67143548 | 3.351890598 | Up   | 0         | 0         | AAEL014099-PA OS=Aedes aegypti GN=AAEL014099 PE=3 SV=1                          |
| CCG024508.1 | 1389 | 608  | 1895 | 18.8089263 | 47.69325737 | 1.342367823 | Up   | 1.30E-12  | 3.16E-12  | AAEL012325-PA OS=Aedes aegypti GN=AAEL012325 PE=4 SV=1                          |



|             |       |      |      |            |             |              |      |          |          |                                                                                                   |
|-------------|-------|------|------|------------|-------------|--------------|------|----------|----------|---------------------------------------------------------------------------------------------------|
| CCG022098.1 | 2700  | 683  | 1896 | 10.8697514 | 24.5484788  | 1.175314684  | Up   | 1.46E-12 | 3.53E-12 | CG1553, isoform B<br>OS=Drosophila melanogaster<br>GN=Nop17l PE=2 SV=1                            |
| CCG016286.1 | 1830  | 41   | 1897 | 0.9627099  | 36.23816997 | 5.234265163  | Up   | 1.02E-13 | 3.20E-13 | Putative uncharacterized protein<br>OS=Culex quinquefasciatus<br>GN=CpipJ_CPIJ004372 PE=4<br>SV=1 |
| CCG018983.1 | 1051  | 593  | 1897 | 24.2445791 | 63.09786017 | 1.379928873  | Up   | 1.13E-12 | 2.78E-12 | AAEL010582-PA OS=Aedes<br>aegypti GN=GSTD11 PE=3 SV=1                                             |
| CCG002413.1 | 1056  | 444  | 1898 | 18.0668202 | 62.83220579 | 1.798161614  | Up   | 6.43E-13 | 1.64E-12 | AAEL011069-PA OS=Aedes<br>aegypti GN=AAEL011069 PE=4<br>SV=1                                      |
| CCG023797.1 | 2161  | 464  | 1898 | 9.22626416 | 30.70375257 | 1.734596486  | Up   | 0        | 0        | AAEL015108-PA OS=Aedes<br>aegypti GN=AAEL015108 PE=4<br>SV=1                                      |
| CCG008904.2 | 1575  | 605  | 1899 | 16.5058346 | 42.14969371 | 1.352546062  | Up   | 2.07E-13 | 5.93E-13 | AAEL000819-PA OS=Aedes<br>aegypti GN=AAEL000819 PE=4<br>SV=1                                      |
| CCG014760.1 | 11971 | 634  | 1899 | 2.275734   | 5.545549043 | 1.284998364  | Up   | 3.52E-13 | 9.51E-13 | AAEL002645-PA OS=Aedes<br>aegypti GN=AAEL002645 PE=4<br>SV=1                                      |
| CCG003741.1 | 786   | 292  | 1901 | 15.9633111 | 84.54921647 | 2.405031462  | Up   | 0        | 0        | -                                                                                                 |
| CCG014805.1 | 21488 | 346  | 1901 | 0.69189911 | 3.092688205 | 2.160227793  | Up   | 2.24E-13 | 6.40E-13 | AAEL013319-PA OS=Aedes<br>aegypti GN=AAEL013319 PE=4<br>SV=1                                      |
| CCG024379.1 | 3210  | 388  | 1901 | 5.19384954 | 20.70270534 | 1.994943178  | Up   | 3.43E-13 | 9.27E-13 | AAEL002290-PA OS=Aedes<br>aegypti GN=AAEL002290 PE=4<br>SV=1                                      |
| CCG009127.1 | 1815  | 4791 | 1903 | 113.425895 | 36.65322352 | -1.629738048 | Down | 0        | 0        | AAEL008672-PA OS=Aedes<br>aegypti GN=AAEL008672 PE=3<br>SV=1                                      |
| CCG021491.1 | 8431  | 123  | 1904 | 0.62688618 | 7.894740716 | 3.654616462  | Up   | 0        | 0        | AAEL010240-PA OS=Aedes<br>aegypti GN=AAEL010240 PE=4<br>SV=1                                      |
| CCG017200.1 | 2097  | 9405 | 1905 | 192.718338 | 31.75751896 | -2.601323742 | Down | 0        | 0        | Pyruvate kinase OS=Aedes<br>aegypti GN=AAEL014913 PE=3<br>SV=1                                    |
| CCG013199.1 | 1524  | 54   | 1908 | 1.52254965 | 43.76666147 | 4.845271158  | Up   | 0        | 0        | AAEL006121-PA OS=Aedes<br>aegypti GN=AAEL006121 PE=3<br>SV=1                                      |
| CCG006864.1 | 1536  | 5971 | 1908 | 167.039248 | 43.42473443 | -1.943598194 | Down | 0        | 0        | AAEL007881-PA OS=Aedes<br>aegypti GN=AAEL007881 PE=4<br>SV=1                                      |
| CCG020674.1 | 3669  | 318  | 1909 | 3.7242779  | 18.1889753  | 2.288031636  | Up   | 1.20E-13 | 3.69E-13 | Tetrapeptide repeat protein 37<br>OS=Culex quinquefasciatus<br>GN=CpipJ_CPIJ001407 PE=4<br>SV=1   |

|             |       |     |      |            |             |             |    |          |          |                                                                                                   |
|-------------|-------|-----|------|------------|-------------|-------------|----|----------|----------|---------------------------------------------------------------------------------------------------|
| CCG010663.1 | 2631  | 550 | 1909 | 8.98265072 | 25.36501344 | 1.497626783 | Up | 5.05E-13 | 1.31E-12 | AAEL008134-PA OS=Aedes aegypti GN=AAEL008134 PE=3 SV=1                                            |
| CCG017251.1 | 2967  | 543 | 1910 | 7.86402625 | 22.50431703 | 1.516861739 | Up | 1.00E-12 | 2.48E-12 | AAEL010525-PA OS=Aedes aegypti GN=AAEL010525 PE=4 SV=1                                            |
| CCG014850.1 | 31008 | 449 | 1912 | 0.62220752 | 2.155580018 | 1.792608377 | Up | 1.06E-12 | 2.60E-12 | AAEL006523-PA OS=Aedes aegypti GN=AAEL006523 PE=4 SV=1                                            |
| CCG011803.1 | 2883  | 513 | 1914 | 7.64601937 | 23.20851257 | 1.601873303 | Up | 0        | 0        | Lon protease homolog OS=Aedes aegypti GN=AAEL006474 PE=3 SV=1                                     |
| CCG027581.1 | 2139  | 247 | 1915 | 4.96190951 | 31.29738196 | 2.657074649 | Up | 0        | 0        | AAEL015048-PA OS=Aedes aegypti GN=AAEL015048 PE=4 SV=1                                            |
| CCG005176.1 | 2505  | 66  | 1917 | 1.13213672 | 26.75250163 | 4.562553706 | Up | 0        | 0        | AAEL008706-PA OS=Aedes aegypti GN=AAEL008706 PE=4 SV=1                                            |
| CCG020781.2 | 2085  | 175 | 1918 | 3.60657245 | 32.15826132 | 3.156489097 | Up | 3.55E-13 | 9.58E-13 | AAEL004877-PA OS=Aedes aegypti GN=AAEL004877 PE=4 SV=1                                            |
| CCG010943.1 | 1251  | 264 | 1918 | 9.06795359 | 53.5971022  | 2.563306089 | Up | 0        | 0        | AAEL003013-PA OS=Aedes aegypti GN=AAEL003013 PE=3 SV=1                                            |
| CCG027445.1 | 1857  | 528 | 1919 | 12.2175659 | 36.12543518 | 1.564058081 | Up | 0        | 0        | AAEL001518-PA (Fragment) OS=Aedes aegypti GN=AAEL001518 PE=4 SV=1                                 |
| CCG022971.1 | 2223  | 663 | 1920 | 12.8155349 | 30.19338345 | 1.236338739 | Up | 1.08E-13 | 3.38E-13 | AAEL012941-PA OS=Aedes aegypti GN=AAEL012941 PE=4 SV=1                                            |
| CCG011143.1 | 546   | 532 | 1922 | 41.8679465 | 123.0582563 | 1.555423389 | Up | 2.30E-13 | 6.57E-13 | AAEL000950-PA OS=Aedes aegypti GN=AAEL000950 PE=4 SV=1                                            |
| CCG023581.1 | 1162  | 390 | 1923 | 14.4218559 | 57.85263875 | 2.004125937 | Up | 6.59E-13 | 1.68E-12 | Eukaryotic translation initiation factor 3 subunit G OS=Anopheles darlingi GN=AND_16989 PE=3 SV=1 |
| CCG007605.1 | 1407  | 282 | 1924 | 8.6122709  | 47.80364215 | 2.472654935 | Up | 5.45E-13 | 1.40E-12 | AAEL002166-PA OS=Aedes aegypti GN=AAEL002166 PE=4 SV=1                                            |
| CCG010308.2 | 4188  | 653 | 1924 | 6.69991325 | 16.06010614 | 1.261267106 | Up | 5.96E-13 | 1.53E-12 | AGAP004049-PA OS=Anopheles gambiae GN=AgaP_AGAP004049 PE=4 SV=5                                   |
| CCG016097.1 | 906   | 309 | 1925 | 14.6552406 | 74.27669182 | 2.341492906 | Up | 6.25E-13 | 1.59E-12 | AAEL006710-PA OS=Aedes aegypti GN=AAEL006710 PE=4 SV=1                                            |

|             |      |      |      |            |             |              |      |          |          |                                                                       |
|-------------|------|------|------|------------|-------------|--------------|------|----------|----------|-----------------------------------------------------------------------|
| CCG024721.2 | 4002 | 394  | 1925 | 4.23040366 | 16.81526307 | 1.990904115  | Up   | 5.49E-13 | 1.41E-12 | AAEL005303-PA OS=Aedes aegypti GN=AAEL005303 PE=4 SV=1                |
| CCG015671.1 | 1531 | 7585 | 1925 | 212.884022 | 43.95472422 | -2.275977531 | Down | 0        | 0        | AAEL001429-PA OS=Aedes aegypti GN=AAEL001429 PE=4 SV=1                |
| CCG013964.1 | 2189 | 166  | 1927 | 3.25855457 | 30.77414314 | 3.239414629  | Up   | 1.83E-13 | 5.32E-13 | AAEL003949-PA OS=Aedes aegypti GN=AAEL003949 PE=4 SV=1                |
| CCG018226.1 | 1426 | 494  | 1927 | 14.8857285 | 47.24025199 | 1.666086829  | Up   | 0        | 0        | AAEL014413-PA OS=Aedes aegypti GN=CYP304C1 PE=3 SV=1                  |
| CCG010684.1 | 2074 | 198  | 1929 | 4.10222153 | 32.51423139 | 2.986594012  | Up   | 0        | 0        | AAEL011651-PA OS=Aedes aegypti GN=AAEL011651 PE=4 SV=1                |
| CCG011472.1 | 2267 | 175  | 1930 | 3.31702848 | 29.76156779 | 3.165487224  | Up   | 3.55E-13 | 9.57E-13 | AAEL002104-PA OS=Aedes aegypti GN=AAEL002104 PE=4 SV=1                |
| CCG018911.2 | 2688 | 411  | 1931 | 6.57014915 | 25.11325612 | 1.934451069  | Up   | 0        | 0        | AAEL003992-PA OS=Aedes aegypti GN=AAEL003992 PE=4 SV=1                |
| CCG017012.1 | 1743 | 75   | 1932 | 1.84895588 | 38.74893329 | 4.389373892  | Up   | 0        | 0        | AAEL012618-PA OS=Aedes aegypti GN=AAEL012618 PE=4 SV=1                |
| CCG007514.1 | 3531 | 48   | 1933 | 0.58412553 | 19.1374537  | 5.033976625  | Up   | 5.35E-14 | 1.80E-13 | Micröcephalin OS=Culex quinquefasciatus GN=CpipJ_CPIJ009302 PE=4 SV=1 |
| CCG026258.1 | 2448 | 145  | 1934 | 2.54518444 | 27.61818108 | 3.439776193  | Up   | 0        | 0        | AAEL012546-PA OS=Aedes aegypti GN=AAEL012546 PE=3 SV=1                |
| CCG006821.1 | 2160 | 310  | 1934 | 6.16695265 | 31.30060522 | 2.343560878  | Up   | 2.14E-13 | 6.15E-13 | Asparagine synthetase OS=Aedes aegypti GN=AAEL015631 PE=4 SV=1        |
| CCG004781.1 | 4591 | 312  | 1934 | 2.92018236 | 14.72648819 | 2.334283064  | Up   | 9.28E-14 | 2.93E-13 | AAEL013391-PA OS=Aedes aegypti GN=AAEL013391 PE=4 SV=1                |
| CCG022899.1 | 2928 | 577  | 1934 | 8.467738   | 23.09061041 | 1.447257775  | Up   | 4.04E-13 | 1.07E-12 | AAEL003229-PA OS=Aedes aegypti GN=AAEL003229 PE=4 SV=1                |
| CCG023527.1 | 6660 | 6852 | 1935 | 44.2085017 | 10.15679663 | -2.121878381 | Down | 0        | 0        | Uncharacterized protein OS=Anopheles darlingi GN=AND_09210 PE=4 SV=1  |
| CCG005366.1 | 1752 | 209  | 1939 | 5.12595578 | 38.68955403 | 2.91605116   | Up   | 0        | 0        | AAEL014307-PA OS=Aedes aegypti GN=AAEL014307 PE=4 SV=1                |
| CCG020115.1 | 4831 | 386  | 1939 | 3.43330937 | 14.03106989 | 2.030953255  | Up   | 2.52E-13 | 7.09E-13 | AAEL015543-PA OS=Aedes aegypti GN=AAEL015543 PE=4 SV=1                |

|             |       |      |      |            |             |              |      |           |           |                                                                                  |
|-------------|-------|------|------|------------|-------------|--------------|------|-----------|-----------|----------------------------------------------------------------------------------|
| CCG002838.1 | 3010  | 94   | 1941 | 1.34191198 | 22.5428622  | 4.070308755  | Up   | 0         | 0         | wvd-repeat protein OS=Culex quinquefasciatus<br>GN=CpipJ_CPIJ011019 PE=4<br>SV=1 |
| CCG009990.1 | 867   | 260  | 1941 | 12.8859642 | 78.26299333 | 2.602529794  | Up   | 3.22E-13  | 8.81E-13  | AAEL0008484-PA OS=Aedes aegypti GN=AAEL008484 PE=4<br>SV=1                       |
| CCG007783.1 | 2712  | 164  | 1942 | 2.59846478 | 25.03280733 | 3.268088685  | Up   | 1.14E-13  | 3.54E-13  | AAEL0008728-PA OS=Aedes aegypti GN=AAEL008728 PE=4<br>SV=1                       |
| CCG026809.1 | 3786  | 169  | 1942 | 1.91808905 | 17.93158307 | 3.224761253  | Up   | 0         | 0         | AAEL012637-PA OS=Aedes aegypti GN=AAEL012637 PE=4<br>SV=1                        |
| CCG003631.1 | 3957  | 433  | 1942 | 4.70202049 | 17.15667766 | 1.867417475  | Up   | 9.43E-13  | 2.34E-12  | AAEL004551-PA OS=Aedes aegypti GN=AAEL004551 PE=4<br>SV=1                        |
| CCG017390.1 | 15353 | 539  | 1942 | 1.50854471 | 4.42187022  | 1.551499226  | Up   | 7.19E-13  | 1.81E-12  | AAEL010378-PA OS=Aedes aegypti GN=AAEL010378 PE=4<br>SV=1                        |
| CCG019500.1 | 2076  | 157  | 1943 | 3.24963793 | 32.71865692 | 3.331762641  | Up   | 0         | 0         | AAEL002478-PA OS=Aedes aegypti GN=AAEL002478 PE=4<br>SV=1                        |
| CCG010777.1 | 4437  | 291  | 1943 | 2.8181638  | 15.30852643 | 2.441508046  | Up   | 6.00E-14  | 1.99E-13  | AAEL009871-PA OS=Aedes aegypti GN=AAEL009871 PE=4<br>SV=1                        |
| CCG024660.1 | 2805  | 685  | 1944 | 10.4935003 | 24.22776829 | 1.20716553   | Up   | 4.65E-13  | 1.21E-12  | AAEL009877-PA (Fragment)<br>OS=Aedes aegypti<br>GN=AAEL009877 PE=4 SV=1          |
| CCG011007.1 | 1638  | 555  | 1945 | 14.5593423 | 41.51028591 | 1.511523682  | Up   | 0         | 0         | -                                                                                |
| CCG023999.1 | 2352  | 597  | 1946 | 10.9068587 | 28.92381233 | 1.407022077  | Up   | 0         | 0         | AAEL009068-PA OS=Aedes aegypti GN=AAEL009068 PE=3<br>SV=1                        |
| CCG019201.1 | 2250  | 96   | 1947 | 1.83337534 | 30.25056217 | 4.044387872  | Up   | 0         | 0         | AAEL011269-PA OS=Aedes aegypti GN=AAEL011269 PE=4<br>SV=1                        |
| CCG019952.1 | 1084  | 780  | 1948 | 30.9191817 | 62.82170033 | 1.022760852  | Up   | 1.45E-12  | 3.51E-12  | AAEL012577-PA OS=Aedes aegypti GN=AAEL012577 PE=4<br>SV=1                        |
| CCG027743.1 | 1422  | 639  | 1949 | 19.3091845 | 47.91398131 | 1.311159458  | Up   | 4.28E-13  | 1.13E-12  | AAEL009837-PA OS=Aedes aegypti GN=AAEL009837 PE=4<br>SV=1                        |
| CCG006720.1 | 2306  | 6575 | 1949 | 122.517782 | 29.54626255 | -2.0519436   | Down | 0         | 0         | AAEL009414-PA OS=Aedes aegypti GN=AAEL009414 PE=4<br>SV=1                        |
| CCG024651.1 | 1422  | 3996 | 1950 | 120.750393 | 47.93856519 | -1.332769255 | Down | 8.88E-264 | 5.50E-263 | AAEL007703-PA OS=Aedes aegypti GN=AAEL007703 PE=4<br>SV=1                        |

|             |      |       |      |            |             |              |      |          |          |                                                                              |
|-------------|------|-------|------|------------|-------------|--------------|------|----------|----------|------------------------------------------------------------------------------|
| CCG028520.1 | 833  | 6260  | 1950 | 322.917814 | 81.83510169 | -1.980375329 | Down | 0        | 0        | NADH dehydrogenase<br>OS=Ochlerotatus taeniorhynchus<br>PE=2 SV=1            |
| CCG024725.1 | 3002 | 379   | 1951 | 5.42489321 | 22.7193864  | 2.066257228  | Up   | 1.40E-13 | 4.20E-13 | AAEL014002-PA OS=Aedes<br>aegypti GN=AAEL014002 PE=4<br>SV=1                 |
| CCG016278.1 | 2094 | 720   | 1951 | 14.7746938 | 32.5709637  | 1.14045817   | Up   | 0        | 0        | AAEL000077-PA OS=Aedes<br>aegypti GN=AAEL000077 PE=4<br>SV=1                 |
| CCG022019.1 | 1251 | 11    | 1952 | 0.3778314  | 54.54720724 | 7.173618923  | Up   | 2.67E-07 | 5.04E-07 | AAEL011582-PA OS=Aedes<br>aegypti GN=AAEL011582 PE=4<br>SV=1                 |
| CCG000753.2 | 2064 | 257   | 1952 | 5.35039816 | 33.06131602 | 2.627425992  | Up   | 4.14E-13 | 1.09E-12 | AAEL007672-PA OS=Aedes<br>aegypti GN=AAEL007672 PE=4<br>SV=1                 |
| CCG026109.1 | 966  | 365   | 1952 | 16.2359763 | 70.64032739 | 2.121297888  | Up   | 2.91E-13 | 8.05E-13 | AAEL009037-PA (Fragment)<br>OS=Aedes aegypti<br>GN=AAEL009037 PE=4 SV=1      |
| CCG001824.1 | 3743 | 291   | 1953 | 3.34068736 | 18.24031914 | 2.448914095  | Up   | 6.00E-14 | 1.99E-13 | AAEL001238-PA OS=Aedes<br>aegypti GN=AAEL001238 PE=4<br>SV=1                 |
| CCG027936.1 | 1838 | 645   | 1953 | 15.0791506 | 37.14554654 | 1.300634087  | Up   | 3.47E-13 | 9.37E-13 | Peptide-O-fucosyltransferase<br>OS=Glossina morsitans morsitans<br>PE=2 SV=1 |
| CCG014845.1 | 3091 | 421   | 1954 | 5.85255848 | 22.09915005 | 1.916851533  | Up   | 4.57E-13 | 1.20E-12 | AAEL010302-PA OS=Aedes<br>aegypti GN=AAEL010302 PE=4<br>SV=1                 |
| CCG026601.2 | 1197 | 652   | 1955 | 23.4054026 | 57.09559824 | 1.286537942  | Up   | 1.50E-12 | 3.61E-12 | AAEL003844-PA OS=Aedes<br>aegypti GN=GALE5 PE=4 SV=1                         |
| CCG010323.1 | 2223 | 172   | 1958 | 3.32469382 | 30.79096083 | 3.211213499  | Up   | 1.35E-13 | 4.09E-13 | AAEL014377-PA OS=Aedes<br>aegypti GN=AAEL014377 PE=4<br>SV=1                 |
| CCG016771.1 | 1719 | 276   | 1960 | 6.8991546  | 39.8593499  | 2.530426686  | Up   | 0        | 0        | AAEL001879-PA OS=Aedes<br>aegypti GN=AAEL001879 PE=4<br>SV=1                 |
| CCG023595.1 | 3752 | 333   | 1961 | 3.81367847 | 18.27110361 | 2.260308657  | Up   | 4.41E-13 | 1.16E-12 | AAEL003573-PA OS=Aedes<br>aegypti GN=AAEL003573 PE=4<br>SV=1                 |
| CCG012727.1 | 784  | 11869 | 1961 | 650.520128 | 87.44028157 | -2.895223744 | Down | 0        | 0        | AAEL008871-PA OS=Aedes<br>aegypti GN=AAEL008871 PE=2<br>SV=1                 |
| CCG007038.1 | 742  | 156   | 1962 | 9.03406819 | 92.43684505 | 3.355020311  | Up   | 1.42E-13 | 4.26E-13 | -                                                                            |
| CCG024886.1 | 7800 | 536   | 1963 | 2.95279202 | 8.797832988 | 1.575068471  | Up   | 0        | 0        | AAEL006187-PA OS=Aedes<br>aegypti GN=AAEL006187 PE=4<br>SV=1                 |

|             |      |      |      |            |             |              |      |           |           |                                                                                                      |
|-------------|------|------|------|------------|-------------|--------------|------|-----------|-----------|------------------------------------------------------------------------------------------------------|
| CCG028407.1 | 9702 | 503  | 1964 | 2.22776505 | 7.076690948 | 1.667477828  | Up   | 1.17E-13  | 3.61E-13  | Transcription-associated protein 1<br>OS=Culex quinquefasciatus<br>GN=CpipJ_CPIJ013348 PE=4<br>SV=1  |
| CCG024534.2 | 3087 | 556  | 1967 | 7.73928489 | 22.27500175 | 1.525153373  | Up   | 1.85E-13  | 5.35E-13  | B-box type zinc-finger protein hcf1<br>OS=Culex quinquefasciatus<br>GN=CpipJ_CPIJ001613 PE=4<br>SV=1 |
| CCG003242.1 | 594  | 7174 | 1967 | 518.964438 | 115.7625091 | -2.164467584 | Down | 0         | 0         | AAEL010850-PA OS=Aedes<br>aegypti GN=AAEL010850 PE=4<br>SV=1                                         |
| CCG007201.1 | 1401 | 3555 | 1969 | 109.034551 | 49.13122553 | -1.150073245 | Down | 2.29E-186 | 1.35E-185 | AAEL001446-PA (Fragment)<br>OS=Aedes aegypti<br>GN=AAEL001446 PE=4 SV=1                              |
| CCG000955.1 | 3240 | 730  | 1970 | 9.68145255 | 21.25549544 | 1.134540464  | Up   | 0         | 0         | AAEL009068-PA OS=Aedes<br>aegypti GN=AAEL009068 PE=3<br>SV=1                                         |
| CCG013274.1 | 2482 | 196  | 1971 | 3.39325866 | 27.7609845  | 3.032315421  | Up   | 7.93E-14  | 2.55E-13  | AAEL001751-PA OS=Aedes<br>aegypti GN=AAEL001751 PE=3<br>SV=1                                         |
| CCG003872.1 | 3513 | 213  | 1972 | 2.60533831 | 19.62360427 | 2.91304742   | Up   | 3.57E-13  | 9.60E-13  | AAEL002437-PA OS=Aedes<br>aegypti GN=AAEL002437 PE=4<br>SV=1                                         |
| CCG014524.1 | 1611 | 436  | 1972 | 11.6293012 | 42.79188193 | 1.879572715  | Up   | 1.61E-13  | 4.76E-13  | AAEL010827-PA OS=Aedes<br>aegypti GN=AAEL010827 PE=4<br>SV=1                                         |
| CCG005704.1 | 1247 | 148  | 1974 | 5.09985623 | 55.3389241  | 3.439766113  | Up   | 0         | 0         | AAEL006037-PA OS=Aedes<br>aegypti GN=AAEL006037 PE=4<br>SV=1                                         |
| CCG010457.1 | 2266 | 340  | 1975 | 6.44735647 | 30.46893055 | 2.240559206  | Up   | 8.86E-14  | 2.81E-13  | AAEL006525-PA OS=Aedes<br>aegypti GN=AAEL006525 PE=4<br>SV=1                                         |
| CCG022269.1 | 2907 | 314  | 1978 | 4.64138172 | 23.78653989 | 2.357519166  | Up   | 4.97E-14  | 1.68E-13  | AAEL014494-PA OS=Aedes<br>aegypti GN=AAEL014494 PE=3<br>SV=1                                         |
| CCG006086.1 | 1116 | 5    | 1979 | 0.19251673 | 61.99142449 | 8.330941006  | Up   | 1.59E-05  | 2.76E-05  | AAEL005916-PA OS=Aedes<br>aegypti GN=AAEL005916 PE=4<br>SV=1                                         |
| CCG023662.1 | 954  | 25   | 1979 | 1.12604126 | 72.51827016 | 6.009012911  | Up   | 9.32E-12  | 2.08E-11  | AAEL003647-PA (Fragment)<br>OS=Aedes aegypti<br>GN=GPRNPR3 PE=3 SV=2                                 |
| CCG010493.1 | 5408 | 3233 | 1979 | 25.6880828 | 12.79260905 | -1.005788691 | Down | 1.38E-136 | 7.73E-136 | AAEL005627-PA OS=Aedes<br>aegypti GN=AAEL005627 PE=4<br>SV=1                                         |
| CCG001745.1 | 840  | 468  | 1980 | 23.9402807 | 82.40165239 | 1.783233199  | Up   | 5.00E-13  | 1.30E-12  | AAEL004109-PA OS=Aedes<br>aegypti GN=AAEL004109 PE=4<br>SV=1                                         |

|             |       |       |      |            |             |              |      |           |            |                                                                                          |
|-------------|-------|-------|------|------------|-------------|--------------|------|-----------|------------|------------------------------------------------------------------------------------------|
| CCG026567.1 | 1343  | 159   | 1981 | 5.08725823 | 51.56541049 | 3.341443413  | Up   | 5.53E-14  | 1.84E-13   | AAEL006836-PA OS=Aedes aegypti GN=AAEL006836 PE=2 SV=1                                   |
| CCG028338.1 | 2556  | 361   | 1981 | 6.06888662 | 27.09403219 | 2.158471342  | Up   | 1.35E-13  | 4.08E-13   | AAEL000730-PA OS=Aedes aegypti GN=AAEL000730 PE=4 SV=1                                   |
| CCG018407.1 | 2590  | 124   | 1985 | 2.05723826 | 26.79234726 | 3.703040185  | Up   | 1.61E-13  | 4.77E-13   | AAEL004493-PA OS=Aedes aegypti GN=AAEL004493 PE=4 SV=1                                   |
| CCG011384.1 | 3405  | 208   | 1985 | 2.62487659 | 20.37949468 | 2.956796778  | Up   | 3.93E-13  | 1.05E-12   | DNA-directed RNA polymerase OS=Anopheles darlingi GN=AND_15508 PE=3 SV=1                 |
| CCG014385.1 | 1749  | 8786  | 1986 | 215.855968 | 39.69533314 | -2.443027673 | Down | 0         | 0          | AAEL005269-PA OS=Aedes aegypti GN=AAEL005269 PE=3 SV=1                                   |
| CCG014580.1 | 1941  | 117   | 1987 | 2.59013856 | 35.78675731 | 3.788324641  | Up   | 9.44E-14  | 2.97E-13   | AAEL005265-PA OS=Aedes aegypti GN=AAEL005265 PE=4 SV=1                                   |
| CCG010452.1 | 2565  | 476   | 1987 | 7.97411059 | 27.08073916 | 1.763871598  | Up   | 4.62E-13  | 1.21E-12   | AAEL001598-PA OS=Aedes aegypti GN=AAEL001598 PE=4 SV=1                                   |
| CCG011591.1 | 3718  | 334   | 1988 | 3.86011064 | 18.69205331 | 2.275710953  | Up   | 3.15E-13  | 8.65E-13   | Putative uncharacterized protein OS=Culex quinquefasciatus GN=CpipJ_CPIJ003232 PE=4 SV=1 |
| CCG017378.1 | 10452 | 14540 | 1988 | 59.7761138 | 6.649163244 | -3.168324403 | Down | 0         | 0          | Putative uncharacterized protein OS=Culex quinquefasciatus GN=CpipJ_CPIJ007110 PE=4 SV=1 |
| CCG021332.1 | 1203  | 542   | 1992 | 19.3595978 | 57.88602438 | 1.580166095  | Up   | 0         | 0          | AAEL013396-PA OS=Aedes aegypti GN=AAEL013396 PE=4 SV=1                                   |
| CCG023340.1 | 1851  | 601   | 1993 | 13.9518155 | 37.64011108 | 1.431818018  | Up   | 0         | 0          | Putative uncharacterized protein OS=Culex quinquefasciatus GN=CpipJ_CPIJ001780 PE=4 SV=1 |
| CCG013675.1 | 1131  | 8593  | 1994 | 326.471202 | 61.63289468 | -2.405183281 | Down | 0         | 0          | AAEL004631-PA OS=Aedes aegypti GN=AAEL004631 PE=3 SV=1                                   |
| CCG026145.1 | 649   | 2     | 1995 | 0.13241829 | 107.4603423 | 9.664486235  | Up   | 9.36E-05  | 0.00015393 | AAEL009504-PA OS=Aedes aegypti GN=AAEL009504 PE=4 SV=1                                   |
| CCG007982.1 | 2589  | 741   | 1995 | 12.2984061 | 26.93772196 | 1.131156503  | Up   | 0         | 0          | AAEL004989-PA OS=Aedes aegypti GN=AAEL004989 PE=4 SV=1                                   |
| CCG004180.1 | 969   | 3823  | 1995 | 169.528685 | 71.97292277 | -1.23600325  | Down | 1.70E-224 | 1.03E-223  | AAEL013305-PA OS=Aedes aegypti GN=AAEL013305 PE=3 SV=1                                   |

|             |       |        |      |            |             |              |      |          |            |                                                                                          |
|-------------|-------|--------|------|------------|-------------|--------------|------|----------|------------|------------------------------------------------------------------------------------------|
| CCG001602.1 | 3379  | 360    | 1996 | 4.57801257 | 20.65010963 | 2.173356113  | Up   | 5.08E-13 | 1.32E-12   | AAEL011815-PA OS=Aedes aegypti GN=AAEL011815 PE=4 SV=1                                   |
| CCG027431.1 | 2113  | 301    | 1998 | 6.12110275 | 33.05567297 | 2.433034395  | Up   | 0        | 0          | AAEL001129-PA OS=Aedes aegypti GN=AAEL001129 PE=4 SV=1                                   |
| CCG011566.1 | 1134  | 268    | 1999 | 10.1551048 | 61.62398172 | 2.60128677   | Up   | 0        | 0          | AAEL009441-PA OS=Aedes aegypti GN=AAEL009441 PE=4 SV=1                                   |
| CCG022518.1 | 2115  | 497    | 1999 | 10.0973797 | 33.04094339 | 1.710273919  | Up   | 7.04E-14 | 2.29E-13   | AAEL013817-PA (Fragment) OS=Aedes aegypti GN=AAEL013817 PE=4 SV=1                        |
| CCG026345.1 | 2181  | 537    | 1999 | 10.5798934 | 32.0410799  | 1.598597683  | Up   | 3.67E-13 | 9.84E-13   | AAEL004419-PA OS=Aedes aegypti GN=AAEL004419 PE=4 SV=1                                   |
| CCG022802.1 | 11835 | 162386 | 1999 | 589.58034  | 5.904655282 | -6.641691771 | Down | 0        | 0          | ADP1,ATP carrier protein 2 OS=Culex quinquefasciatus GN=CpipJ_CPIJ005941 PE=3 SV=1       |
| CCG020757.1 | 3423  | 792    | 2000 | 9.94216471 | 20.42551959 | 1.038740868  | Up   | 1.23E-12 | 3.00E-12   | AAEL011927-PA OS=Aedes aegypti GN=AAEL011927 PE=4 SV=1                                   |
| CCG006085.3 | 1983  | 1      | 2001 | 0.02166905 | 35.2755985  | 10.66881866  | Up   | 0.000587 | 0.00091666 | AAEL005916-PA OS=Aedes aegypti GN=AAEL005916 PE=4 SV=1                                   |
| CCG026289.1 | 2795  | 360    | 2002 | 5.53456331 | 25.03988197 | 2.177686366  | Up   | 5.08E-13 | 1.32E-12   | AAEL001729-PA OS=Aedes aegypti GN=AAEL001729 PE=4 SV=1                                   |
| CCG003740.1 | 3588  | 540    | 2002 | 6.46701691 | 19.50570516 | 1.592723866  | Up   | 9.26E-13 | 2.31E-12   | Putative uncharacterized protein OS=Culex quinquefasciatus GN=CpipJ_CPIJ008967 PE=4 SV=1 |
| CCG019942.1 | 2838  | 203    | 2004 | 3.07359272 | 24.68512567 | 3.00564408   | Up   | 9.28E-14 | 2.93E-13   | Putative uncharacterized protein OS=Culex quinquefasciatus GN=CpipJ_CPIJ017587 PE=4 SV=1 |
| CCG011201.1 | 2964  | 377    | 2005 | 5.4654487  | 23.64755227 | 2.113279012  | Up   | 4.66E-13 | 1.21E-12   | AAEL009428-PA (Fragment) OS=Aedes aegypti GN=AAEL009428 PE=4 SV=1                        |
| CCG005789.1 | 3708  | 170    | 2006 | 1.97002559 | 18.91216376 | 3.263028158  | Up   | 3.53E-13 | 9.52E-13   | AAEL003896-PA OS=Aedes aegypti GN=AAEL003896 PE=4 SV=1                                   |
| CCG013476.1 | 2427  | 199    | 2007 | 3.52327037 | 28.90863679 | 3.036513485  | Up   | 0        | 0          | -                                                                                        |
| CCG004576.1 | 1470  | 161    | 2009 | 4.70620903 | 47.77631159 | 3.343658174  | Up   | 0        | 0          | AAEL010402-PA OS=Aedes aegypti GN=AAEL010402 PE=3 SV=1                                   |



|             |       |       |      |            |             |              |      |          |          |                                                               |
|-------------|-------|-------|------|------------|-------------|--------------|------|----------|----------|---------------------------------------------------------------|
| CCG001271.1 | 3249  | 783   | 2009 | 10.355587  | 21.61624439 | 1.061706555  | Up   | 0        | 0        | AAEL000622-PA OS=Aedes aegypti GN=AAEL000622 PE=4 SV=1        |
| CCG016851.1 | 1668  | 385   | 2010 | 9.91807424 | 42.125981   | 2.086578354  | Up   | 7.93E-13 | 1.99E-12 | Alkaline phosphatase OS=Aedes aegypti GN=AAEL003313 PE=3 SV=1 |
| CCG020145.1 | 1401  | 7969  | 2010 | 244.415286 | 50.15427289 | -2.284889992 | Down | 0        | 0        | AAEL002175-PA OS=Aedes aegypti GN=AAEL002175 PE=4 SV=1        |
| CCG006556.1 | 12684 | 397   | 2011 | 1.34492153 | 5.542501939 | 2.043015373  | Up   | 8.02E-13 | 2.01E-12 | AAEL000140-PA OS=Aedes aegypti GN=AAEL000140 PE=4 SV=1        |
| CCG012056.1 | 1938  | 13178 | 2011 | 292.185326 | 36.27507461 | -3.009833241 | Down | 0        | 0        | AGAP004944-PA OS=Anopheles gambiae GN=AGAP004944 PE=3 SV=3    |
| CCG026424.3 | 6315  | 818   | 2013 | 5.56599254 | 11.1434697  | 1.001487628  | Up   | 0        | 0        | AAEL010014-PA OS=Aedes aegypti GN=AAEL010014 PE=4 SV=1        |
| CCG026576.1 | 2421  | 402   | 2014 | 7.1349993  | 29.0813587  | 2.027109481  | Up   | 0        | 0        | AAEL003146-PA OS=Aedes aegypti GN=AAEL003146 PE=4 SV=1        |
| CCG011634.1 | 1758  | 9     | 2015 | 0.21998158 | 40.06878709 | 7.508952326  | Up   | 1.09E-06 | 2.01E-06 | AAEL004821-PA OS=Aedes aegypti GN=AAEL004821 PE=4 SV=1        |
| CCG000855.1 | 5536  | 755   | 2015 | 5.86021489 | 12.72415601 | 1.118544493  | Up   | 3.09E-13 | 8.51E-13 | AAEL007689-PA OS=Aedes aegypti GN=AAEL007689 PE=4 SV=1        |
| CCG027477.1 | 408   | 350   | 2016 | 36.8612919 | 172.7350146 | 2.228382015  | Up   | 3.00E-14 | 1.04E-13 | -                                                             |
| CCG012504.1 | 2278  | 535   | 2016 | 10.0916629 | 30.93761456 | 1.616198046  | Up   | 2.42E-14 | 8.44E-14 | AAEL008479-PA OS=Aedes aegypti GN=AAEL008479 PE=4 SV=1        |
| CCG015278.1 | 1188  | 5     | 2018 | 0.18084905 | 59.38198866 | 8.359095568  | Up   | 1.59E-05 | 2.76E-05 | AAEL009875-PA OS=Aedes aegypti GN=AAEL009875 PE=4 SV=1        |
| CCG013168.1 | 1119  | 249   | 2018 | 9.56162995 | 63.04361262 | 2.721021731  | Up   | 0        | 0        | AAEL000634-PA OS=Aedes aegypti GN=AAEL000634 PE=4 SV=1        |
| CCG004859.1 | 1104  | 508   | 2018 | 19.7723054 | 63.90018345 | 1.692338976  | Up   | 6.20E-13 | 1.58E-12 | AAEL011849-PA OS=Aedes aegypti GN=AAEL011849 PE=4 SV=1        |
| CCG015174.1 | 3165  | 674   | 2018 | 9.15058487 | 22.28935309 | 1.284418882  | Up   | 0        | 0        | AAEL003357-PA OS=Aedes aegypti GN=AAEL003357 PE=4 SV=1        |
| CCG023674.1 | 3993  | 797   | 2018 | 8.5767289  | 17.66736853 | 1.042587749  | Up   | 5.68E-13 | 1.46E-12 | AAEL002061-PA OS=Aedes aegypti GN=AAEL002061 PE=3 SV=1        |
| CCG008698.1 | 2194  | 424   | 2019 | 8.30408727 | 32.16990009 | 1.953817945  | Up   | 0        | 0        | AAEL009913-PA OS=Aedes aegypti GN=AAEL009913 PE=4 SV=1        |

|             |       |      |      |            |             |              |      |          |          |                                                                                                      |
|-------------|-------|------|------|------------|-------------|--------------|------|----------|----------|------------------------------------------------------------------------------------------------------|
| CCG002063.1 | 11851 | 494  | 2019 | 1.79116099 | 5.955679757 | 1.733371168  | Up   | 0        | 0        | AAEL008796-PA OS=Aedes aegypti GN=AAEL008796 PE=4 SV=1                                               |
| CCG008098.1 | 2421  | 183  | 2020 | 3.24802207 | 29.16799632 | 3.166752943  | Up   | 3.05E-13 | 8.41E-13 | AAEL011376-PA (Fragment) OS=Aedes aegypti GN=AAEL011376 PE=3 SV=1                                    |
| CCG004874.1 | 1247  | 272  | 2020 | 9.37270875 | 56.62848362 | 2.59498994   | Up   | 5.36E-13 | 1.38E-12 | AAEL009730-PA OS=Aedes aegypti GN=AAEL009730 PE=4 SV=1                                               |
| CCG008320.1 | 3843  | 422  | 2021 | 4.71850846 | 18.3842512  | 1.962067621  | Up   | 5.52E-13 | 1.42E-12 | AAEL013182-PA OS=Aedes aegypti GN=AAEL013182 PE=4 SV=1                                               |
| CCG021193.1 | 1767  | 536  | 2022 | 13.034396  | 40.00318938 | 1.617791295  | Up   | 0        | 0        | AAEL010460-PA OS=Aedes aegypti GN=AAEL010460 PE=4 SV=1                                               |
| CCG010862.1 | 1545  | 5424 | 2022 | 150.852971 | 45.75122047 | -1.721260977 | Down | 0        | 0        | 26S proteasome regulatory chain 4 OS=Aedes aegypti GN=AAEL012095 PE=2 SV=1                           |
| CCG022993.1 | 1499  | 363  | 2023 | 10.4056129 | 47.17851495 | 2.18076807   | Up   | 0        | 0        | AAEL005070-PA OS=Aedes aegypti GN=AAEL005070 PE=4 SV=1                                               |
| CCG028591.1 | 2097  | 315  | 2025 | 6.45468116 | 33.75799259 | 2.386811378  | Up   | 4.28E-13 | 1.13E-12 | AAEL000768-PA OS=Aedes aegypti GN=AAEL000768 PE=4 SV=1                                               |
| CCG028490.1 | 1464  | 361  | 2027 | 10.5956791 | 48.40193102 | 2.19158855   | Up   | 1.35E-13 | 4.08E-13 | AAEL005476-PA OS=Aedes aegypti GN=AAEL005476 PE=4 SV=1                                               |
| CCG014680.1 | 7266  | 376  | 2028 | 2.2235921  | 9.757140833 | 2.133566289  | Up   | 3.71E-14 | 1.28E-13 | AAEL000693-PA OS=Aedes aegypti GN=AAEL000693 PE=4 SV=1                                               |
| CCG007315.1 | 1991  | 461  | 2030 | 9.94929566 | 35.64304462 | 1.840954275  | Up   | 1.29E-13 | 3.95E-13 | Uncharacterized protein OS=Anopheles darlingi GN=AND_11769 PE=4 SV=1                                 |
| CCG006220.1 | 3417  | 141  | 2031 | 1.7731146  | 20.77853676 | 3.550736376  | Up   | 0        | 0        | AAEL011780-PA OS=Aedes aegypti GN=AAEL011780 PE=3 SV=1                                               |
| CCG009512.1 | 4887  | 281  | 2031 | 2.47073776 | 14.52839372 | 2.555861408  | Up   | 0        | 0        | AAEL001384-PA (Fragment) OS=Aedes aegypti GN=AAEL001384 PE=4 SV=1                                    |
| CCG025931.1 | 1748  | 352  | 2032 | 8.65294427 | 40.6379968  | 2.231566272  | Up   | 5.16E-13 | 1.34E-12 | ATP-dependent (S)-NAD(P)-hydrate dehydratase OS=Culex quinquefasciatus GN=CpipJ_CPIJ005232 PE=3 SV=1 |

|             |      |      |      |            |             |              |      |           |           |                                                                                                                    |
|-------------|------|------|------|------------|-------------|--------------|------|-----------|-----------|--------------------------------------------------------------------------------------------------------------------|
| CCG006173.1 | 2336 | 79   | 2035 | 1.45317168 | 30.45380703 | 4.389345535  | Up   | 0         | 0         | AAEL011376-PA (Fragment)<br>OS=Aedes aegypti<br>GN=AAEL011376 PE=3 SV=1                                            |
| CCG016201.1 | 2979 | 134  | 2036 | 1.93284473 | 23.89226301 | 3.627745859  | Up   | 0         | 0         | DNA topoisomerase OS=Aedes<br>aegypti GN=AAEL007683 PE=3<br>SV=1                                                   |
| CCG008188.1 | 4320 | 519  | 2037 | 5.16233617 | 16.48379856 | 1.67495274   | Up   | 0         | 0         | AGAP006599-PA OS=Anopheles<br>gambiae GN=AGAP006599 PE=4<br>SV=4                                                   |
| CCG019021.1 | 3800 | 653  | 2037 | 7.38400966 | 18.73947626 | 1.343604287  | Up   | 5.96E-13  | 1.53E-12  | -                                                                                                                  |
| CCG015441.2 | 1419 | 4144 | 2037 | 125.487372 | 50.18323452 | -1.322264819 | Down | 3.79E-270 | 2.36E-269 | AAEL009131-PA OS=Aedes<br>aegypti GN=CYP6Z8 PE=3 SV=1                                                              |
| CCG004396.1 | 927  | 517  | 2038 | 23.9647819 | 76.85541323 | 1.68123107   | Up   | 8.39E-14  | 2.69E-13  | AAEL001606-PA (Fragment)<br>OS=Aedes aegypti GN=GPRMTN<br>PE=3 SV=2                                                |
| CCG026052.1 | 6444 | 711  | 2038 | 4.74107407 | 11.05601615 | 1.22154579   | Up   | 0         | 0         | Plasma membrane calcium-<br>transporting ATPase 2 OS=Culex<br>quinquefasciatus<br>GN=CpipJ_CPIJ005742 PE=3<br>SV=1 |
| CCG000757.1 | 3078 | 278  | 2039 | 3.88095719 | 23.15787081 | 2.577018191  | Up   | 2.11E-14  | 7.39E-14  | AAEL008413-PA (Fragment)<br>OS=Aedes aegypti<br>GN=AAEL008413 PE=4 SV=1                                            |
| CCG017400.1 | 4158 | 265  | 2040 | 2.73857135 | 17.1512469  | 2.646818091  | Up   | 4.94E-13  | 1.28E-12  | Serine/threonine-protein kinase 3<br>OS=Culex quinquefasciatus<br>GN=CpipJ_CPIJ000288 PE=4<br>SV=1                 |
| CCG018847.1 | 4319 | 455  | 2040 | 4.52679538 | 16.51189734 | 1.866943906  | Up   | 0         | 0         | AAEL003519-PA OS=Aedes<br>aegypti GN=AAEL003519 PE=4<br>SV=1                                                       |
| CCG024566.1 | 7857 | 762  | 2044 | 4.16735876 | 9.094402154 | 1.125845497  | Up   | 5.84E-13  | 1.50E-12  | AAEL009677-PA OS=Aedes<br>aegypti GN=AAEL009677 PE=4<br>SV=1                                                       |
| CCG010994.1 | 4170 | 382  | 2047 | 3.93631622 | 17.16057375 | 2.124179763  | Up   | 6.17E-13  | 1.58E-12  | Putative uncharacterized protein<br>OS=Culex quinquefasciatus<br>GN=CpipJ_CPIJ009355 PE=4<br>SV=1                  |
| CCG015290.1 | 1893 | 8067 | 2049 | 183.115081 | 37.83914903 | -2.274799068 | Down | 0         | 0         | AAEL004739-PA OS=Aedes<br>aegypti GN=AAEL004739 PE=3<br>SV=1                                                       |

|             |       |       |      |            |             |              |      |           |           |                                                                                                |
|-------------|-------|-------|------|------------|-------------|--------------|------|-----------|-----------|------------------------------------------------------------------------------------------------|
| CCG004805.1 | 1293  | 790   | 2050 | 26.2537435 | 55.42495544 | 1.078012555  | Up   | 8.07E-13  | 2.02E-12  | AAEL014187-PA OS=Aedes aegypti GN=AAEL014187 PE=4 SV=1                                         |
| CCG016290.1 | 873   | 76    | 2051 | 3.74077873 | 82.1299263  | 4.456497467  | Up   | 0         | 0         | AAEL013721-PA OS=Aedes aegypti GN=AAEL013721 PE=4 SV=1                                         |
| CCG014405.1 | 2779  | 608   | 2051 | 9.40107904 | 25.80044104 | 1.456497467  | Up   | 1.30E-12  | 3.16E-12  | AAEL005445-PA OS=Aedes aegypti GN=AAEL005445 PE=4 SV=1                                         |
| CCG011802.2 | 2718  | 213   | 2052 | 3.36738538 | 26.3923414  | 2.970418599  | Up   | 3.57E-13  | 9.60E-13  | Putative uncharacterized protein OS=Culex quinquefasciatus GN=CpipJ_CPIJ008798 PE=4 SV=1       |
| CCG024078.1 | 792   | 703   | 2052 | 38.1410649 | 90.57371709 | 1.24774734   | Up   | 2.48E-13  | 6.98E-13  | AAEL006554-PA OS=Aedes aegypti GN=AAEL006554 PE=4 SV=1                                         |
| CCG026014.2 | 14079 | 10170 | 2052 | 31.0392926 | 5.095133457 | -2.606903839 | Down | 0         | 0         | AAEL011129-PA OS=Aedes aegypti GN=AAEL011129 PE=3 SV=1                                         |
| CCG001177.1 | 2817  | 588   | 2053 | 8.96918848 | 25.47722478 | 1.506158771  | Up   | 8.31E-13  | 2.08E-12  | AAEL009416-PA OS=Aedes aegypti GN=AAEL009416 PE=4 SV=1                                         |
| CCG008926.1 | 1974  | 420   | 2056 | 9.14249673 | 36.4104443  | 1.993692235  | Up   | 1.84E-13  | 5.32E-13  | AAEL000569-PA OS=Aedes aegypti GN=AAEL000569 PE=4 SV=1                                         |
| CCG011066.1 | 20902 | 683   | 2057 | 1.40409189 | 3.440301183 | 1.292897514  | Up   | 1.46E-12  | 3.53E-12  | AAEL003548-PA (Fragment) OS=Aedes aegypti GN=AAEL003548 PE=4 SV=1                              |
| CCG006361.2 | 5421  | 4005  | 2058 | 31.7457641 | 13.27137679 | -1.258246057 | Down | 9.36E-242 | 5.74E-241 | Kinesin-like protein Kif-1A OS=Culex quinquefasciatus GN=CpipJ_CPIJ004723 PE=3 SV=1            |
| CCG002466.1 | 1782  | 696   | 2060 | 16.782792  | 40.41192489 | 1.26779833   | Up   | 3.08E-13  | 8.48E-13  | AAEL010065-PA OS=Aedes aegypti GN=AAEL010065 PE=2 SV=1                                         |
| CCG027597.1 | 913   | 8013  | 2060 | 377.126488 | 78.87628713 | -2.257384935 | Down | 0         | 0         | AAEL013876-PA OS=Aedes aegypti GN=AAEL013876 PE=2 SV=1                                         |
| CCG018681.1 | 2115  | 152   | 2062 | 3.08813223 | 34.08225376 | 3.464214308  | Up   | 8.39E-14  | 2.69E-13  | AAEL004842-PA OS=Aedes aegypti GN=AAEL004842 PE=4 SV=1                                         |
| CCG000983.1 | 18455 | 403   | 2062 | 0.93832582 | 3.905931547 | 2.057505793  | Up   | 0         | 0         | Cation efflux protein/zinc transporter OS=Culex quinquefasciatus GN=CpipJ_CPIJ010101 PE=4 SV=1 |
| CCG024489.1 | 28948 | 3584  | 2062 | 5.32000583 | 2.490119065 | -1.095213101 | Down | 1.10E-173 | 6.38E-173 | -                                                                                              |

|             |       |       |      |            |             |              |      |           |           |                                                                                                            |
|-------------|-------|-------|------|------------|-------------|--------------|------|-----------|-----------|------------------------------------------------------------------------------------------------------------|
| CCG002101.1 | 1074  | 240   | 2063 | 9.60217533 | 67.14983704 | 2.805950714  | Up   | 0         | 0         | AAEL006129-PA OS=Aedes aegypti GN=AAEL006129 PE=4 SV=1                                                     |
| CCG009304.2 | 12626 | 4297  | 2063 | 14.6238674 | 5.711937667 | -1.356272752 | Down | 3.22E-291 | 2.02E-290 | AAEL007778-PA OS=Aedes aegypti GN=AAEL007778 PE=4 SV=1                                                     |
| CCG007022.1 | 577   | 10466 | 2063 | 779.412899 | 124.9894714 | -2.640581234 | Down | 0         | 0         | AAEL007490-PA OS=Aedes aegypti GN=AAEL007490 PE=4 SV=1                                                     |
| CCG016160.1 | 7047  | 414   | 2064 | 2.52440331 | 10.23895037 | 2.020053502  | Up   | 8.70E-13  | 2.17E-12  | Activating signal cointegrator 1 complex subunit 3 OS=Culex quinquefasciatus GN=CpipJ_CPIJ006748 PE=4 SV=1 |
| CCG012277.1 | 2400  | 464   | 2064 | 8.30748202 | 30.06411802 | 1.855559464  | Up   | 0         | 0         | AAEL011202-PB OS=Aedes aegypti GN=AAEL011202 PE=4 SV=1                                                     |
| CCG025548.1 | 29804 | 733   | 2064 | 1.05679826 | 2.420946291 | 1.195871071  | Up   | 0         | 0         | AGAP007375-PA OS=Anopheles gambiae GN=AGAP007375 PE=4 SV=4                                                 |
| CCG006022.1 | 8848  | 96    | 2065 | 0.46621774 | 8.158775038 | 4.129276769  | Up   | 0         | 0         | -                                                                                                          |
| CCG009652.1 | 2730  | 111   | 2067 | 1.74712108 | 26.46840956 | 3.921220011  | Up   | 0         | 0         | AAEL013940-PA OS=Aedes aegypti GN=AAEL013940 PE=4 SV=1                                                     |
| CCG006944.1 | 3786  | 283   | 2067 | 3.21194794 | 19.08577868 | 2.570977634  | Up   | 0         | 0         | AAEL002925-PA OS=Aedes aegypti GN=AAEL002925 PE=4 SV=1                                                     |
| CCG026520.1 | 819   | 265   | 2068 | 13.9035161 | 88.27071595 | 2.666485125  | Up   | 4.94E-13  | 1.28E-12  | AAEL006743-PA OS=Aedes aegypti GN=AAEL006743 PE=2 SV=1                                                     |
| CCG003701.1 | 4212  | 780   | 2068 | 7.95735826 | 17.16375032 | 1.10900336   | Up   | 1.45E-12  | 3.51E-12  | AAEL005062-PA OS=Aedes aegypti GN=AAEL005062 PE=4 SV=1                                                     |
| CCG014397.1 | 2616  | 174   | 2069 | 2.85807868 | 27.64857593 | 3.274087638  | Up   | 1.78E-13  | 5.20E-13  | AAEL005827-PA (Fragment) OS=Aedes aegypti GN=AAEL005827 PE=4 SV=1                                          |
| CCG007428.1 | 4875  | 6231  | 2070 | 54.9219316 | 14.84382214 | -1.887519745 | Down | 0         | 0         | AAEL004099-PA OS=Aedes aegypti GN=AAEL004099 PE=4 SV=1                                                     |
| CCG002483.1 | 1182  | 529   | 2071 | 19.2309557 | 61.25092318 | 1.67130113   | Up   | 0         | 0         | AAEL001017-PA OS=Aedes aegypti GN=AAEL001017 PE=4 SV=1                                                     |
| CCG012061.1 | 43842 | 5473  | 2071 | 5.36411107 | 1.651352383 | -1.699691099 | Down | 0         | 0         | SLC4-like anion exchanger OS=Aedes aegypti PE=2 SV=1                                                       |
| CCG013709.1 | 3747  | 202   | 2073 | 2.31648956 | 19.34040773 | 3.061606122  | Up   | 0         | 0         | AAEL000685-PA OS=Aedes aegypti GN=AAEL000685 PE=4 SV=1                                                     |

|             |      |      |      |            |             |              |      |           |           |                                                                                                               |
|-------------|------|------|------|------------|-------------|--------------|------|-----------|-----------|---------------------------------------------------------------------------------------------------------------|
| CCG024804.1 | 2615 | 330  | 2073 | 5.42256689 | 27.71262247 | 2.353495391  | Up   | 1.76E-13  | 5.16E-13  | AAEL013205-PA OS=Aedes aegypti GN=AAEL013205 PE=4 SV=1                                                        |
| CCG004215.1 | 840  | 4170 | 2073 | 213.31404  | 86.27203303 | -1.306014063 | Down | 1.13E-266 | 7.01E-266 | AAEL005238-PA OS=Aedes aegypti GN=AAEL005238 PE=4 SV=1                                                        |
| CCG010543.1 | 1172 | 577  | 2074 | 21.1548949 | 61.86302562 | 1.548085874  | Up   | 4.04E-13  | 1.07E-12  | AAEL001623-PA OS=Aedes aegypti GN=AAEL001623 PE=2 SV=1                                                        |
| CCG017439.1 | 1526 | 248  | 2075 | 6.98328583 | 47.53500937 | 2.767012515  | Up   | 5.86E-14  | 1.95E-13  | AAEL006235-PA OS=Aedes aegypti GN=AAEL006235 PE=4 SV=1                                                        |
| CCG012726.1 | 1686 | 432  | 2075 | 11.0100388 | 43.02397645 | 1.966321323  | Up   | 7.71E-13  | 1.94E-12  | AAEL008864-PA OS=Aedes aegypti GN=AAEL008864 PE=4 SV=1                                                        |
| CCG016700.1 | 1150 | 735  | 2077 | 27.4632652 | 63.1376877  | 1.200998265  | Up   | 2.17E-13  | 6.21E-13  | AAEL009217-PA OS=Aedes aegypti GN=AAEL009217 PE=4 SV=1                                                        |
| CCG017923.1 | 1797 | 179  | 2079 | 4.28023511 | 40.4442167  | 3.240171469  | Up   | 0         | 0         | AAEL009572-PA (Fragment) OS=Aedes aegypti GN=AAEL009572 PE=3 SV=1                                             |
| CCG024072.1 | 3288 | 612  | 2080 | 7.9980163  | 22.11472497 | 1.467293174  | Up   | 6.59E-13  | 1.68E-12  | AAEL012045-PA (Fragment) OS=Aedes aegypti GN=AAEL012045 PE=4 SV=1                                             |
| CCG012447.2 | 2379 | 813  | 2080 | 14.6844869 | 30.56461357 | 1.057569475  | Up   | 0         | 0         | Probable membrane protein OS=Aedes aegypti PE=2 SV=1                                                          |
| CCG006391.1 | 2082 | 221  | 2081 | 4.56114858 | 34.94148605 | 2.937471894  | Up   | 0         | 0         | Acyl-coenzyme A oxidase OS=Aedes aegypti GN=AAEL000370 PE=3 SV=1                                              |
| CCG002446.2 | 1785 | 696  | 2081 | 16.7545856 | 40.75527953 | 1.282430958  | Up   | 3.08E-13  | 8.48E-13  | AAEL011055-PA OS=Aedes aegypti GN=AAEL011055 PE=3 SV=1                                                        |
| CCG016161.1 | 4364 | 652  | 2083 | 6.41985952 | 16.68608857 | 1.378032174  | Up   | 1.50E-12  | 3.61E-12  | AAEL014059-PA OS=Aedes aegypti GN=AAEL014059 PE=4 SV=1                                                        |
| CCG022820.1 | 4848 | 5512 | 2084 | 48.8550283 | 15.02744406 | -1.700907407 | Down | 0         | 0         | AAEL003855-PA OS=Aedes aegypti GN=AAEL003855 PE=4 SV=1                                                        |
| CCG006581.1 | 2016 | 835  | 2086 | 17.7974843 | 36.17210583 | 1.023204259  | Up   | 0         | 0         | AAEL012683-PA OS=Aedes aegypti GN=AAEL012683 PE=4 SV=1                                                        |
| CCG015407.1 | 3852 | 351  | 2087 | 3.91546647 | 18.94027093 | 2.274200869  | Up   | 4.44E-15  | 1.60E-14  | Cell division cycle and apoptosis regulator protein 1 OS=Culex quinquefasciatus GN=CpipJ_CPIJ018512 PE=4 SV=1 |

|             |       |     |      |            |              |             |    |          |          |                                                                                                    |
|-------------|-------|-----|------|------------|--------------|-------------|----|----------|----------|----------------------------------------------------------------------------------------------------|
| CCG001092.1 | 2259  | 463 | 2088 | 8.80698855 | 32.31203271  | 1.875350817 | Up | 6.16E-13 | 1.57E-12 | AAEL001009-PA (Fragment)<br>OS=Aedes aegypti<br>GN=AAEL001009 PE=4 SV=1                            |
| CCG020474.1 | 4248  | 482 | 2089 | 4.87556782 | 17.191111115 | 1.818020645 | Up | 0        | 0        | AAEL001397-PA OS=Aedes<br>aegypti GN=AAEL001397 PE=3<br>SV=1                                       |
| CCG010782.1 | 4935  | 593 | 2089 | 5.16333387 | 14.79794127  | 1.519021686 | Up | 1.13E-12 | 2.78E-12 | Putative uncharacterized protein<br>OS=Culex quinquefasciatus<br>GN=CpipJ_CPIJ002903 PE=4<br>SV=1  |
| CCG002846.1 | 664   | 191 | 2091 | 12.36027   | 110.086983   | 3.154861722 | Up | 6.68E-14 | 2.20E-13 | AAEL003469-PA OS=Aedes<br>aegypti GN=AAEL003469 PE=4<br>SV=1                                       |
| CCG016191.1 | 5410  | 499 | 2091 | 3.96338218 | 13.51160014  | 1.769394545 | Up | 0        | 0        | AAEL011534-PA OS=Aedes<br>aegypti GN=AAEL011534 PE=4<br>SV=1                                       |
| CCG010209.1 | 48867 | 834 | 2091 | 0.73335295 | 1.495851121  | 1.028386977 | Up | 4.58E-13 | 1.20E-12 | AAEL001731-PA OS=Aedes<br>aegypti GN=AAEL001731 PE=4<br>SV=1                                       |
| CCG011957.1 | 1833  | 670 | 2092 | 15.7063405 | 39.89782597  | 1.344963055 | Up | 8.60E-13 | 2.15E-12 | Uncharacterized protein<br>OS=Anopheles darlingi<br>GN=AND_03313 PE=4 SV=1                         |
| CCG005140.1 | 2355  | 681 | 2092 | 12.425643  | 31.05423143  | 1.321469352 | Up | 1.31E-14 | 4.67E-14 | Transporter (Fragment)<br>OS=Aedes aegypti<br>GN=AAEL010883 PE=3 SV=1                              |
| CCG013877.1 | 4023  | 320 | 2093 | 3.4179257  | 18.18734111  | 2.411741705 | Up | 0        | 0        | AAEL005480-PA OS=Aedes<br>aegypti GN=AAEL005480 PE=4<br>SV=1                                       |
| CCG008767.3 | 3351  | 553 | 2093 | 7.09109616 | 21.83457872  | 1.62253413  | Up | 7.29E-13 | 1.83E-12 | AAEL010433-PA (Fragment)<br>OS=Aedes aegypti<br>GN=AAEL010433 PE=4 SV=1                            |
| CCG000704.1 | 2421  | 282 | 2094 | 5.00514877 | 30.23652687  | 2.594807578 | Up | 5.45E-13 | 1.40E-12 | AAEL003146-PA OS=Aedes<br>aegypti GN=AAEL003146 PE=4<br>SV=1                                       |
| CCG024139.1 | 2792  | 703 | 2094 | 10.8193852 | 26.21870758  | 1.276978052 | Up | 2.48E-13 | 6.98E-13 | Inhibitor of kappa kinase epsilon<br>OS=Culex quinquefasciatus<br>GN=CpipJ_CPIJ006852 PE=4<br>SV=1 |
| CCG018734.1 | 7791  | 126 | 2095 | 0.69492832 | 9.400281073  | 3.757767809 | Up | 1.34E-13 | 4.06E-13 | AAEL010069-PA OS=Aedes<br>aegypti GN=AAEL010069 PE=4<br>SV=1                                       |
| CCG028156.1 | 5667  | 236 | 2096 | 1.7894578  | 12.9296891   | 2.853093156 | Up | 4.60E-13 | 1.20E-12 | AAEL011505-PA (Fragment)<br>OS=Aedes aegypti<br>GN=AAEL011505 PE=4 SV=1                            |

|             |       |      |      |            |             |              |      |           |           |                                                                                 |
|-------------|-------|------|------|------------|-------------|--------------|------|-----------|-----------|---------------------------------------------------------------------------------|
| CCG026469.1 | 3208  | 354  | 2096 | 4.74167271 | 22.84056986 | 2.268130655  | Up   | 0         | 0         | AAEL003839-PA OS=Aedes aegypti GN=AAEL003839 PE=4 SV=1                          |
| CCG017160.1 | 7584  | 3539 | 2097 | 20.0514097 | 9.666074155 | -1.052701697 | Down | 7.15E-161 | 4.11E-160 | AAEL005017-PA OS=Aedes aegypti GN=AAEL005017 PE=4 SV=1                          |
| CCG012746.1 | 23282 | 3997 | 2099 | 7.37694482 | 3.151680395 | -1.226902202 | Down | 6.63E-232 | 4.04E-231 | AAEL004972-PA OS=Aedes aegypti GN=AAEL004972 PE=4 SV=1                          |
| CCG022057.1 | 2013  | 185  | 2101 | 3.94903175 | 36.48650745 | 3.20779219   | Up   | 0         | 0         | Zinc finger protein 250 OS=Culex quinquefasciatus GN=CpipJ_CPIJ001374 PE=4 SV=1 |
| CCG014220.1 | 2850  | 745  | 2101 | 11.2324394 | 25.77099632 | 1.198077035  | Up   | 0         | 0         | AAEL012594-PA (Fragment) OS=Aedes aegypti GN=AAEL012594 PE=4 SV=1               |
| CCG020864.1 | 11462 | 823  | 2101 | 3.08533341 | 6.407899101 | 1.05442503   | Up   | 7.96E-13  | 1.99E-12  | Axotactin OS=Culex quinquefasciatus GN=CpipJ_CPIJ006837 PE=4 SV=1               |
| CCG018615.3 | 582   | 9019 | 2101 | 665.883224 | 126.1981778 | -2.399578115 | Down | 0         | 0         | Acyl carrier protein OS=Aedes aegypti GN=AAEL010611 PE=3 SV=1                   |
| CCG006801.1 | 1288  | 668  | 2102 | 22.2855456 | 57.05147343 | 1.356155865  | Up   | 9.28E-13  | 2.31E-12  | AAEL012250-PA OS=Aedes aegypti GN=AAEL012250 PE=4 SV=1                          |
| CCG002590.1 | 5197  | 4196 | 2102 | 34.6932858 | 14.13936844 | -1.294938805 | Down | 8.48E-265 | 5.26E-264 | AAEL003267-PA (Fragment) OS=Aedes aegypti GN=AAEL003267 PE=4 SV=2               |
| CCG013857.1 | 984   | 42   | 2103 | 1.83407404 | 74.71265859 | 5.348228916  | Up   | 7.66E-14  | 2.47E-13  | AAEL006813-PA OS=Aedes aegypti GN=AAEL006813 PE=4 SV=1                          |
| CCG024070.1 | 2529  | 460  | 2103 | 7.81576826 | 29.06969397 | 1.895056288  | Up   | 0         | 0         | AAEL010912-PA OS=Aedes aegypti GN=AAEL010912 PE=4 SV=1                          |
| CCG026293.1 | 2871  | 664  | 2103 | 9.93796718 | 25.60684641 | 1.365506907  | Up   | 4.96E-13  | 1.29E-12  | AAEL006876-PA OS=Aedes aegypti GN=AAEL006876 PE=4 SV=1                          |
| CCG016956.1 | 2876  | 680  | 2104 | 10.1597425 | 25.57448342 | 1.331841257  | Up   | 4.12E-13  | 1.09E-12  | Sodium/hydrogen exchanger OS=Aedes aegypti GN=NHE8 PE=2 SV=1                    |
| CCG013985.1 | 3088  | 224  | 2106 | 3.11697557 | 23.84136363 | 2.935248003  | Up   | 2.04E-13  | 5.88E-13  | AAEL004228-PA OS=Aedes aegypti GN=AAEL004228 PE=4 SV=1                          |



|             |      |      |      |            |             |              |      |          |          |                                                                   |
|-------------|------|------|------|------------|-------------|--------------|------|----------|----------|-------------------------------------------------------------------|
| CCG010491.1 | 1039 | 259  | 2108 | 10.711416  | 70.92593593 | 2.727164068  | Up   | 0        | 0        | AAEL005638-PA OS=Aedes aegypti GN=AAEL005638 PE=4 SV=1            |
| CCG002318.4 | 8288 | 302  | 2108 | 1.56574081 | 8.89141499  | 2.505567616  | Up   | 4.59E-13 | 1.20E-12 | AAEL003075-PA OS=Aedes aegypti GN=AAEL003075 PE=4 SV=1            |
| CCG020802.1 | 1887 | 295  | 2109 | 6.71757907 | 39.07101522 | 2.540085439  | Up   | 2.32E-13 | 6.62E-13 | AAEL012002-PA OS=Aedes aegypti GN=AAEL012002 PE=4 SV=1            |
| CCG028136.1 | 1881 | 744  | 2109 | 16.9960035 | 39.19564365 | 1.205497773  | Up   | 0        | 0        | AAEL012151-PA (Fragment) OS=Aedes aegypti GN=AAEL012151 PE=4 SV=1 |
| CCG005765.1 | 1173 | 542  | 2110 | 19.8547282 | 62.88317476 | 1.663191446  | Up   | 0        | 0        | AAEL009363-PA OS=Aedes aegypti GN=AAEL009363 PE=4 SV=1            |
| CCG025521.1 | 2034 | 4627 | 2110 | 97.7487522 | 36.26448574 | -1.430520896 | Down | 0        | 0        | Acyl-coenzyme A oxidase OS=Aedes aegypti GN=AAEL008574 PE=3 SV=1  |
| CCG003904.1 | 2578 | 120  | 2113 | 2.00014281 | 28.65276913 | 3.84049966   | Up   | 0        | 0        | AAEL000999-PA OS=Aedes aegypti GN=AAEL000999 PE=3 SV=1            |
| CCG023381.1 | 2232 | 216  | 2115 | 4.15836141 | 33.12578646 | 2.99386765   | Up   | 1.38E-13 | 4.17E-13 | AAEL011118-PA (Fragment) OS=Aedes aegypti GN=AAEL011118 PE=3 SV=1 |
| CCG026583.1 | 1629 | 489  | 2116 | 12.8988338 | 45.40927787 | 1.815746461  | Up   | 1.91E-13 | 5.52E-13 | AAEL000433-PA OS=Aedes aegypti GN=AAEL000433 PE=3 SV=1            |
| CCG013034.1 | 2522 | 359  | 2118 | 6.11662757 | 29.35829905 | 2.262960044  | Up   | 0        | 0        | AAEL000750-PA OS=Aedes aegypti GN=AAEL000750 PE=4 SV=1            |
| CCG016018.1 | 1308 | 627  | 2119 | 20.5978774 | 56.63347743 | 1.459159443  | Up   | 3.40E-13 | 9.23E-13 | AAEL008744-PA OS=Aedes aegypti GN=AAEL008744 PE=4 SV=1            |
| CCG017413.1 | 2875 | 462  | 2121 | 6.90504953 | 25.79008871 | 1.901093068  | Up   | 0        | 0        | AAEL006395-PA OS=Aedes aegypti GN=AAEL006395 PE=4 SV=1            |
| CCG022428.1 | 2115 | 142  | 2122 | 2.88496563 | 35.07397792 | 3.603775025  | Up   | 2.62E-13 | 7.34E-13 | DNA polymerase OS=Aedes aegypti GN=AAEL009851 PE=3 SV=1           |
| CCG016973.1 | 3921 | 153  | 2122 | 1.67670732 | 18.9190164  | 3.496134302  | Up   | 0        | 0        | AAEL011215-PA OS=Aedes aegypti GN=AAEL011215 PE=4 SV=1            |
| CCG016903.1 | 1743 | 310  | 2124 | 7.64235096 | 42.59975896 | 2.478756849  | Up   | 2.14E-13 | 6.15E-13 | AAEL005110-PA OS=Aedes aegypti GN=AAEL005110 PE=4 SV=1            |
| CCG024480.1 | 2815 | 620  | 2125 | 9.46402681 | 26.38946293 | 1.479435924  | Up   | 4.74E-13 | 1.23E-12 | AAEL010837-PA OS=Aedes aegypti GN=AAEL010837 PE=4 SV=1            |

|             |       |       |      |            |             |              |      |          |          |                                                                                          |
|-------------|-------|-------|------|------------|-------------|--------------|------|----------|----------|------------------------------------------------------------------------------------------|
| CCG005910.1 | 1323  | 258   | 2133 | 8.37958543 | 56.36130337 | 2.749754199  | Up   | 1.69E-13 | 4.97E-13 | AAEL005626-PA OS=Aedes aegypti GN=AAEL005628 PE=4 SV=1                                   |
| CCG020620.1 | 1101  | 22    | 2134 | 0.85861413 | 67.75745925 | 6.302226046  | Up   | 8.38E-11 | 1.80E-10 | AAEL004978-PA OS=Aedes aegypti GN=AAEL004978 PE=2 SV=1                                   |
| CCG000634.1 | 2197  | 145   | 2135 | 2.83596337 | 33.9717437  | 3.582424468  | Up   | 0        | 0        | Putative uncharacterized protein OS=Culex quinquefasciatus GN=CpipJ_CPIJ016156 PE=4 SV=1 |
| CCG001321.1 | 2393  | 597   | 2135 | 10.7199881 | 31.18926908 | 1.540746437  | Up   | 0        | 0        | AAEL010549-PA OS=Aedes aegypti GN=AAEL010549 PE=4 SV=1                                   |
| CCG009209.1 | 2229  | 90    | 2136 | 1.73498255 | 33.49972148 | 4.271156039  | Up   | 0        | 0        | AAEL002569-PA OS=Aedes aegypti GN=AAEL002569 PE=4 SV=1                                   |
| CCG016400.1 | 2853  | 264   | 2137 | 3.97616892 | 26.18501138 | 2.719290277  | Up   | 0        | 0        | Putative uncharacterized protein OS=Culex quinquefasciatus GN=CpipJ_CPIJ009380 PE=4 SV=1 |
| CCG020804.1 | 1746  | 351   | 2138 | 8.63824562 | 42.80687041 | 2.309032121  | Up   | 4.44E-15 | 1.60E-14 | AAEL001171-PA OS=Aedes aegypti GN=AAEL001171 PE=4 SV=1                                   |
| CCG019509.1 | 1668  | 90    | 2139 | 2.31851086 | 44.82958874 | 4.273180875  | Up   | 0        | 0        | AAEL006024-PA OS=Aedes aegypti GN=AAEL006024 PE=4 SV=1                                   |
| CCG020708.1 | 4296  | 297   | 2139 | 2.97067299 | 17.40590177 | 2.55071485   | Up   | 2.44E-13 | 6.86E-13 | AAEL005432-PA OS=Aedes aegypti GN=AAEL005432 PE=4 SV=1                                   |
| CCG009538.1 | 3795  | 601   | 2140 | 6.80495665 | 19.71296767 | 1.534487104  | Up   | 0        | 0        | AAEL006499-PA OS=Aedes aegypti GN=AAEL006499 PE=4 SV=1                                   |
| CCG023464.1 | 33949 | 521   | 2141 | 0.65943715 | 2.204650227 | 1.741242722  | Up   | 0        | 0        | AAEL003883-PA (Fragment) OS=Aedes aegypti GN=AAEL003883 PE=4 SV=1                        |
| CCG010882.2 | 1743  | 702   | 2141 | 17.306227  | 42.94071748 | 1.311055064  | Up   | 6.78E-13 | 1.71E-12 | AAEL003416-PA OS=Aedes aegypti GN=AAEL003416 PE=4 SV=1                                   |
| CCG021494.1 | 804   | 11126 | 2142 | 594.628442 | 93.13511051 | -2.674591422 | Down | 0        | 0        | AAEL010230-PA OS=Aedes aegypti GN=AAEL010230 PE=4 SV=1                                   |
| CCG010814.1 | 3879  | 69    | 2143 | 0.76434949 | 19.31311862 | 4.659204882  | Up   | 0        | 0        | AAEL009238-PA OS=Aedes aegypti GN=AAEL009238 PE=4 SV=1                                   |
| CCG012752.1 | 3431  | 325   | 2143 | 4.07028964 | 21.83491318 | 2.423433431  | Up   | 1.19E-13 | 3.66E-13 | Putative uncharacterized protein OS=Culex quinquefasciatus GN=CpipJ_CPIJ003370 PE=4 SV=1 |

|             |      |      |      |            |             |              |      |          |          |                                                                                                                    |
|-------------|------|------|------|------------|-------------|--------------|------|----------|----------|--------------------------------------------------------------------------------------------------------------------|
| CCG009029.1 | 1365 | 185  | 2144 | 5.82373693 | 54.90882447 | 3.237020934  | Up   | 0        | 0        | ATP-dependent (S)-NAD(P) <sup>+</sup> -hydrate dehydratase OS=Culex quinquefasciatus GN=CpipJ_CPIJ005232 PE=3 SV=1 |
| CCG005285.1 | 3207 | 325  | 2146 | 4.35458801 | 23.39272278 | 2.425451657  | Up   | 1.19E-13 | 3.66E-13 | AAEL010526-PA OS=Aedes aegypti GN=AAEL010526 PE=4 SV=1                                                             |
| CCG020653.1 | 3461 | 260  | 2148 | 3.22800665 | 21.69615097 | 2.748723669  | Up   | 3.22E-13 | 8.81E-13 | AAEL010081-PA OS=Aedes aegypti GN=AAEL010081 PE=4 SV=1                                                             |
| CCG011136.1 | 2555 | 294  | 2149 | 4.94446261 | 29.40326293 | 2.572090626  | Up   | 0        | 0        | AAEL014701-PA OS=Aedes aegypti GN=AAEL014701 PE=4 SV=1                                                             |
| CCG003852.1 | 1493 | 8682 | 2151 | 249.874907 | 50.36520652 | -2.310706694 | Down | 0        | 0        | AAEL006833-PA OS=Aedes aegypti GN=AAEL006833 PE=2 SV=1                                                             |
| CCG005104.1 | 642  | 344  | 2157 | 23.0242815 | 117.4532757 | 2.35085891   | Up   | 4.69E-13 | 1.22E-12 | Putative uncharacterized protein OS=Culex quinquefasciatus GN=CpipJ_CPIJ003833 PE=4 SV=1                           |
| CCG008944.1 | 999  | 185  | 2161 | 7.95735826 | 75.62045656 | 3.2484151    | Up   | 0        | 0        | Putative uncharacterized protein OS=Culex quinquefasciatus GN=CpipJ_CPIJ003010 PE=4 SV=1                           |
| CCG011238.1 | 2952 | 710  | 2163 | 10.3348616 | 25.61475361 | 1.309455939  | Up   | 9.64E-14 | 3.03E-13 | Ubiquitin carboxyl-terminal hydrolase OS=Culex quinquefasciatus GN=CpipJ_CPIJ010867 PE=3 SV=1                      |
| CCG003643.1 | 1872 | 389  | 2164 | 8.92907413 | 40.41117037 | 2.178171643  | Up   | 0        | 0        | AGAP011732-PA OS=Anopheles gambiae GN=AGAP011732 PE=4 SV=3                                                         |
| CCG007390.1 | 2394 | 826  | 2164 | 14.8258149 | 31.59971217 | 1.091800016  | Up   | 1.49E-13 | 4.45E-13 | AGAP005404-PA OS=Anopheles gambiae GN=AGAP005404 PE=4 SV=3                                                         |
| CCG026795.1 | 2914 | 326  | 2165 | 4.80718376 | 25.97277598 | 2.433736359  | Up   | 6.17E-13 | 1.58E-12 | AAEL003815-PA OS=Aedes aegypti GN=AAEL003815 PE=4 SV=1                                                             |
| CCG008525.1 | 2616 | 171  | 2167 | 2.80880146 | 28.95817499 | 3.365944127  | Up   | 3.42E-13 | 9.25E-13 | AAEL011827-PA OS=Aedes aegypti GN=AAEL011827 PE=4 SV=1                                                             |
| CCG025458.1 | 8509 | 746  | 2167 | 3.76723728 | 8.902877631 | 1.240764822  | Up   | 0        | 0        | Cholinephosphate cytidyl transferase isoform B2 OS=Aedes aegypti GN=CCT PE=2 SV=1                                  |

|             |      |     |      |            |             |             |    |          |          |                                                                    |
|-------------|------|-----|------|------------|-------------|-------------|----|----------|----------|--------------------------------------------------------------------|
| CCG018557.1 | 2079 | 448 | 2169 | 9.25947143 | 36.47162209 | 1.977772619 | Up | 0        | 0        | AAEL002240-PA OS=Aedes aegypti GN=AAEL002240 PE=4 SV=1             |
| CCG020061.1 | 1500 | 158 | 2173 | 4.52614538 | 50.64289028 | 3.484004915 | Up | 0        | 0        | AAEL014146-PA OS=Aedes aegypti GN=AAEL014146 PE=4 SV=1             |
| CCG027101.1 | 2572 | 503 | 2173 | 8.40349009 | 29.53512264 | 1.813371073 | Up | 1.17E-13 | 3.61E-13 | AAEL011204-PA OS=Aedes aegypti GN=AAEL011204 PE=4 SV=1             |
| CCG028418.1 | 2861 | 258 | 2174 | 3.87493587 | 26.56389154 | 2.777222173 | Up | 1.69E-13 | 4.97E-13 | AAEL002910-PA OS=Aedes aegypti GN=AAEL002910 PE=4 SV=1             |
| CCG027765.1 | 894  | 672 | 2174 | 32.2993978 | 85.01039564 | 1.396132006 | Up | 0        | 0        | AAEL005862-PA (Fragment) OS=Aedes aegypti GN=AAEL005862 PE=4 SV=1  |
| CCG020651.1 | 2906 | 111 | 2175 | 1.64130783 | 26.16457398 | 3.994697023 | Up | 0        | 0        | AAEL010086-PA OS=Aedes aegypti GN=AAEL010086 PE=3 SV=1             |
| CCG009302.1 | 3061 | 449 | 2175 | 6.30297643 | 24.83967722 | 1.978541255 | Up | 1.06E-12 | 2.60E-12 | AAEL007417-PA OS=Aedes aegypti GN=AAEL007417 PE=4 SV=1             |
| CCG006348.1 | 2301 | 158 | 2176 | 2.95055109 | 33.05919611 | 3.485995297 | Up | 0        | 0        | AAEL014161-PA OS=Aedes aegypti GN=AAEL014161 PE=4 SV=1             |
| CCG014986.1 | 2595 | 646 | 2176 | 10.6968973 | 29.31376118 | 1.45438569  | Up | 1.08E-12 | 2.64E-12 | AAEL006950-PA OS=Aedes aegypti GN=AAEL006950 PE=4 SV=1             |
| CCG009246.1 | 1341 | 141 | 2178 | 4.51807053 | 56.77787234 | 3.65155009  | Up | 0        | 0        | AAEL012427-PA OS=Aedes aegypti GN=AAEL012427 PE=4 SV=1             |
| CCG024199.1 | 957  | 740 | 2181 | 33.2263361 | 79.66980318 | 1.261705798 | Up | 0        | 0        | AAEL001800-PA OS=Aedes aegypti GN=AAEL001800 PE=4 SV=1             |
| CCG017562.1 | 3117 | 91  | 2183 | 1.25449017 | 24.48313064 | 4.286614979 | Up | 0        | 0        | AAEL013725-PA OS=Aedes aegypti GN=AAEL013725 PE=4 SV=1             |
| CCG025021.1 | 2840 | 727 | 2187 | 10.9996469 | 26.92033497 | 1.291239155 | Up | 1.67E-12 | 4.00E-12 | AAEL014095-PA OS=Aedes aegypti GN=AAEL014095 PE=4 SV=1             |
| CCG021045.1 | 2718 | 338 | 2189 | 5.34355051 | 28.15440318 | 2.397490007 | Up | 1.44E-13 | 4.32E-13 | DNA ligase (Fragment) OS=Anopheles gambiae GN=AGAP009222 PE=3 SV=3 |
| CCG026527.2 | 1944 | 423 | 2190 | 9.34989596 | 39.38200933 | 2.074514505 | Up | 1.18E-13 | 3.65E-13 | AAEL009674-PA OS=Aedes aegypti GN=AAEL009674 PE=4 SV=1             |
| CCG028579.1 | 3284 | 283 | 2191 | 3.70293389 | 23.32325956 | 2.65502873  | Up | 0        | 0        | AAEL011382-PA OS=Aedes aegypti GN=AAEL011382 PE=4 SV=1             |

|             |      |       |      |            |             |              |      |           |           |                                                                                           |
|-------------|------|-------|------|------------|-------------|--------------|------|-----------|-----------|-------------------------------------------------------------------------------------------|
| CCG021071.1 | 1530 | 5292  | 2192 | 148.624729 | 50.08401483 | -1.56925206  | Down | 0         | 0         | Catalase OS=Aedes aegypti<br>GN=CAT1B PE=3 SV=1                                           |
| CCG003166.2 | 1667 | 272   | 2193 | 7.01125844 | 45.9889028  | 2.713540459  | Up   | 5.36E-13  | 1.38E-12  | AAEL010747-PA OS=Aedes<br>aegypti GN=AAEL010747 PE=4<br>SV=1                              |
| CCG014148.1 | 1627 | 626   | 2194 | 16.5329157 | 47.14103211 | 1.511642167  | Up   | 0         | 0         | AAEL010473-PA OS=Aedes<br>aegypti GN=AAEL010473 PE=4<br>SV=1                              |
| CCG001831.1 | 7698 | 70    | 2196 | 0.39073544 | 9.972509196 | 4.673692526  | Up   | 0         | 0         | AAEL010069-PA OS=Aedes<br>aegypti GN=AAEL010069 PE=4<br>SV=1                              |
| CCG020089.1 | 3024 | 7747  | 2197 | 110.081526 | 25.39792793 | -2.115789666 | Down | 0         | 0         | Curagen IV alpha 1 chain<br>OS=Culex quinquefasciatus<br>GN=CpipJ_CPIJ005294 PE=4<br>SV=1 |
| CCG006812.1 | 1487 | 374   | 2198 | 10.8074517 | 51.67336405 | 2.257394415  | Up   | 1.37E-13  | 4.12E-13  | AAEL001048-PA OS=Aedes<br>aegypti GN=AAEL001048 PE=3<br>SV=1                              |
| CCG024414.1 | 870  | 486   | 2199 | 24.0037828 | 88.36005819 | 1.880132589  | Up   | 0         | 0         | AAEL005536-PA OS=Aedes<br>aegypti GN=AAEL005536 PE=4<br>SV=1                              |
| CCG006570.1 | 2674 | 682   | 2199 | 10.9593714 | 28.74841085 | 1.391317164  | Up   | 1.08E-12  | 2.66E-12  | AAEL005728-PA OS=Aedes<br>aegypti GN=AAEL005728 PE=3<br>SV=1                              |
| CCG019133.1 | 1710 | 4028  | 2199 | 101.217597 | 44.95511732 | -1.170902875 | Down | 5.13E-217 | 3.09E-216 | AAEL002296-PA OS=Aedes<br>aegypti GN=AAEL002296 PE=3<br>SV=1                              |
| CCG027878.1 | 4571 | 527   | 2202 | 4.95406916 | 16.84054374 | 1.765252806  | Up   | 8.05E-13  | 2.01E-12  | TBC1 domain family OS=Culex<br>quinquefasciatus<br>GN=CpipJ_CPIJ004857 PE=4<br>SV=1       |
| CCG026413.3 | 1591 | 854   | 2203 | 23.0648355 | 48.40545803 | 1.069474724  | Up   | 1.02E-12  | 2.51E-12  | Proteasome subunit alpha type<br>OS=Aedes aegypti<br>GN=AAEL009898 PE=3 SV=1              |
| CCG024798.1 | 1164 | 20408 | 2206 | 753.373148 | 66.25254172 | -3.507316904 | Down | 0         | 0         | AAEL010814-PA OS=Aedes<br>aegypti GN=AAEL010814 PE=3<br>SV=1                              |
| CCG018239.1 | 1680 | 75    | 2208 | 1.91829172 | 45.94516376 | 4.58201897   | Up   | 0         | 0         | Rap35 OS=Culex<br>quinquefasciatus<br>GN=CpipJ_CPIJ007568 PE=4<br>SV=1                    |
| CCG025665.1 | 6318 | 829   | 2208 | 5.63816239 | 12.21713756 | 1.115609369  | Up   | 8.95E-14  | 2.83E-13  | AAEL012079-PA (Fragment)<br>OS=Aedes aegypti<br>GN=AAEL012079 PE=4 SV=1                   |
| CCG004187.1 | 2719 | 360   | 2211 | 5.6892624  | 28.42690325 | 2.320943417  | Up   | 5.08E-13  | 1.32E-12  | AAEL012519-PA OS=Aedes<br>aegypti GN=AAEL012519 PE=4<br>SV=1                              |

|             |      |      |      |            |             |              |      |          |            |                                                                                                   |
|-------------|------|------|------|------------|-------------|--------------|------|----------|------------|---------------------------------------------------------------------------------------------------|
| CCG001243.1 | 1316 | 428  | 2211 | 13.9749593 | 58.73309266 | 2.071329527  | Up   | 1.52E-13 | 4.51E-13   | AAEL005579-PA OS=Aedes aegypti GN=AAEL005579 PE=4 SV=1                                            |
| CCG021932.1 | 2673 | 380  | 2212 | 6.10867907 | 28.92918377 | 2.243593266  | Up   | 0        | 0          | AAEL014012-PA OS=Aedes aegypti GN=AAEL014012 PE=4 SV=1                                            |
| CCG020956.1 | 1512 | 8961 | 2213 | 254.663883 | 51.16578472 | -2.315343083 | Down | 0        | 0          | AAEL008167-PA OS=Aedes aegypti GN=AAEL008167 PE=3 SV=1                                            |
| CCG027945.1 | 1816 | 767  | 2214 | 18.1485608 | 42.61983743 | 1.231669943  | Up   | 0        | 0          | AGAP006127-PA OS=Anopheles gambiae GN=AGAP006127 PE=4 SV=1                                        |
| CCG005210.1 | 935  | 1    | 2216 | 0.04595694 | 82.85298538 | 10.81605537  | Up   | 0.000587 | 0.00091797 | AAEL017520-PA OS=Aedes aegypti GN=FOHSDR-2 PE=2 SV=1                                              |
| CCG008068.1 | 2148 | 492  | 2216 | 9.84222972 | 36.06496337 | 1.873540865  | Up   | 0        | 0          | AGAP005928-PA OS=Anopheles gambiae GN=AGAP005928 PE=4 SV=1                                        |
| CCG023814.2 | 1305 | 516  | 2216 | 16.9903318 | 59.36210063 | 1.804828114  | Up   | 9.75E-14 | 3.07E-13   | AAEL012117-PA (Fragment) OS=Aedes aegypti GN=AAEL012117 PE=3 SV=1                                 |
| CCG012912.1 | 2988 | 4606 | 2216 | 66.2378171 | 25.92621865 | -1.353243326 | Down | 0        | 0          | AAEL005290-PA OS=Aedes aegypti GN=AAEL005290 PE=4 SV=1                                            |
| CCG013266.1 | 3727 | 450  | 2217 | 5.18818905 | 20.79487513 | 2.002925067  | Up   | 9.36E-13 | 2.33E-12   | Putative uncharacterized protein OS=Culex quinquefasciatus GN=CpipJ_CPIJ009380 PE=4 SV=1          |
| CCG007599.1 | 2280 | 223  | 2218 | 4.20274159 | 34.00765697 | 3.016456954  | Up   | 0        | 0          | Putative uncharacterized protein OS=Culex quinquefasciatus GN=CpipJ_CPIJ006088 PE=4 SV=1          |
| CCG016723.1 | 4065 | 631  | 2218 | 6.67008673 | 19.07440538 | 1.515860659  | Up   | 0        | 0          | Sit-1000 mo GTPase activating protein 1,3 OS=Culex quinquefasciatus GN=CpipJ_CPIJ014404 PE=4 SV=1 |
| CCG010623.2 | 1713 | 469  | 2221 | 11.7646267 | 45.32535476 | 1.945862769  | Up   | 0        | 0          | AAEL001968-PA OS=Aedes aegypti GN=AAEL001968 PE=4 SV=1                                            |
| CCG001399.1 | 906  | 502  | 2222 | 23.8088375 | 85.73652427 | 1.848412751  | Up   | 6.14E-13 | 1.57E-12   | SKCAZ and CDKNTA-interacting protein OS=Culex quinquefasciatus GN=CpipJ_CPIJ012086 PE=4 SV=1      |

|             |      |     |      |            |             |             |    |          |          |                                                                                                  |
|-------------|------|-----|------|------------|-------------|-------------|----|----------|----------|--------------------------------------------------------------------------------------------------|
| CCG001279.1 | 1558 | 611 | 2222 | 16.8514171 | 49.85705455 | 1.564927735 | Up | 2.21E-13 | 6.34E-13 | AAEL007001-PA OS=Aedes aegypti GN=AAEL007001 PE=4 SV=1                                           |
| CCG022836.1 | 2199 | 288 | 2223 | 5.62768693 | 35.33981322 | 2.650680435 | Up | 0        | 0        | AAEL012115-PA OS=Aedes aegypti GN=AAEL012115 PE=4 SV=1                                           |
| CCG010479.1 | 3872 | 753 | 2223 | 8.35645924 | 20.07031231 | 1.264099382 | Up | 6.29E-13 | 1.60E-12 | AAEL008198-PA (Fragment) OS=Aedes aegypti GN=AAEL008198 PE=4 SV=1                                |
| CCG013610.1 | 3084 | 380 | 2226 | 5.29458468 | 25.23253051 | 2.252695473 | Up | 0        | 0        | AAEL010204-PA OS=Aedes aegypti GN=AAEL010204 PE=4 SV=1                                           |
| CCG005920.1 | 2001 | 302 | 2227 | 6.48518733 | 38.90658789 | 2.584794307 | Up | 4.59E-13 | 1.20E-12 | CTCF-like protein OS=Aedes aegypti PE=2 SV=1                                                     |
| CCG010710.1 | 1866 | 314 | 2228 | 7.23070561 | 41.74010753 | 2.529225972 | Up | 4.97E-14 | 1.68E-13 | Transporter OS=Aedes aegypti GN=AAEL003624 PE=3 SV=1                                             |
| CCG016382.1 | 3141 | 438 | 2231 | 5.99195917 | 24.83028191 | 2.051000942 | Up | 4.14E-13 | 1.09E-12 | AAEL014315-PA OS=Aedes aegypti GN=AAEL014315 PE=4 SV=1                                           |
| CCG018776.1 | 3984 | 593 | 2231 | 6.39584654 | 19.57628401 | 1.613899708 | Up | 1.13E-12 | 2.78E-12 | AAEL000737-PB (Fragment) OS=Aedes aegypti GN=AAEL000737 PE=4 SV=1                                |
| CCG011403.1 | 5480 | 763 | 2232 | 5.98282984 | 14.23848061 | 1.250895269 | Up | 4.81E-13 | 1.25E-12 | AAEL003275-PA OS=Aedes aegypti GN=AAEL003275 PE=4 SV=2                                           |
| CCG017360.1 | 3714 | 285 | 2234 | 3.29735443 | 21.02767644 | 2.672908565 | Up | 4.57E-13 | 1.20E-12 | F-box and leucine-rich repeat protein 11 OS=Culex quinquefasciatus GN=CpipJ_CPIJ008371 PE=4 SV=1 |
| CCG021446.1 | 2572 | 255 | 2235 | 4.26021863 | 30.37781827 | 2.834018883 | Up | 0        | 0        | AAEL003539-PA OS=Aedes aegypti GN=AAEL003539 PE=4 SV=1                                           |
| CCG009391.1 | 690  | 170 | 2236 | 10.5867462 | 113.2850824 | 3.419626741 | Up | 3.53E-13 | 9.52E-13 | AAEL008578-PA OS=Aedes aegypti GN=AAEL008578 PE=4 SV=1                                           |
| CCG028517.1 | 1673 | 4   | 2237 | 0.10273696 | 46.74337426 | 8.829662745 | Up | 2.95E-05 | 5.03E-05 | AAEL006123-PA OS=Aedes aegypti GN=AAEL006123 PE=3 SV=1                                           |
| CCG012675.1 | 1366 | 6   | 2237 | 0.18873968 | 57.24865676 | 8.244700244 | Up | 8.38E-06 | 1.48E-05 | AAEL001401-PA OS=Aedes aegypti GN=AAEL001401 PE=4 SV=1                                           |
| CCG023494.1 | 453  | 100 | 2238 | 9.48559263 | 172.707778  | 4.186451335 | Up | 0        | 0        | Putative salivary secreted peptide OS=Aedes albopictus PE=2 SV=1                                 |

|             |      |     |      |            |             |             |    |          |          |                                                                                          |
|-------------|------|-----|------|------------|-------------|-------------|----|----------|----------|------------------------------------------------------------------------------------------|
| CCG012705.1 | 1765 | 482 | 2238 | 11.7345111 | 44.32669882 | 1.917418189 | Up | 0        | 0        | AAEL001626-PA OS=Aedes aegypti GN=AAEL001626 PE=4 SV=1                                   |
| CCG010555.2 | 4831 | 229 | 2239 | 2.0368597  | 16.20194198 | 2.991748229 | Up | 2.46E-13 | 6.93E-13 | AAEL009067-PA OS=Aedes aegypti GN=AAEL009067 PE=4 SV=1                                   |
| CCG003175.1 | 2112 | 646 | 2239 | 13.1432048 | 37.060408   | 1.495561662 | Up | 1.08E-12 | 2.64E-12 | AAEL010723-PA (Fragment) OS=Aedes aegypti GN=AAEL010723 PE=4 SV=1                        |
| CCG001539.1 | 1804 | 132 | 2240 | 3.14412692 | 43.40717293 | 3.787202101 | Up | 1.46E-13 | 4.36E-13 | AAEL002142-PA OS=Aedes aegypti GN=AAEL002142 PE=4 SV=1                                   |
| CCG023700.1 | 1274 | 154 | 2240 | 5.19414374 | 61.46510202 | 3.56480968  | Up | 1.82E-13 | 5.28E-13 | AAEL003403-PA (Fragment) OS=Aedes aegypti GN=AAEL003403 PE=4 SV=1                        |
| CCG003828.1 | 1890 | 356 | 2241 | 8.09377012 | 41.45052817 | 2.356506706 | Up | 7.93E-13 | 1.99E-12 | AAEL009882-PA OS=Aedes aegypti GN=AAEL009882 PE=4 SV=1                                   |
| CCG009526.1 | 2129 | 628 | 2241 | 12.6749616 | 36.79732186 | 1.537619388 | Up | 1.62E-13 | 4.78E-13 | AAEL011442-PA OS=Aedes aegypti GN=AAEL011442 PE=4 SV=1                                   |
| CCG023144.1 | 1392 | 401 | 2243 | 12.378494  | 56.33003937 | 2.186068682 | Up | 1.05E-13 | 3.28E-13 | Uncharacterized protein OS=Anopheles darlingi GN=AND_23192 PE=4 SV=1                     |
| CCG022787.1 | 2502 | 87  | 2245 | 1.49415144 | 31.36743859 | 4.391869438 | Up | 0        | 0        | AAEL005281-PA OS=Aedes aegypti GN=AAEL005281 PE=4 SV=1                                   |
| CCG002506.1 | 1803 | 640 | 2245 | 15.2527067 | 43.52819265 | 1.512884839 | Up | 0        | 0        | Putative uncharacterized protein OS=Culex quinquefasciatus GN=CpipJ_CPIJ007543 PE=4 SV=1 |
| CCG007594.1 | 3410 | 807 | 2246 | 10.1690838 | 23.02530488 | 1.179030553 | Up | 9.50E-13 | 2.36E-12 | Putative uncharacterized protein OS=Culex quinquefasciatus GN=CpipJ_CPIJ005947 PE=4 SV=1 |
| CCG003245.1 | 1874 | 72  | 2247 | 1.6509183  | 41.91635427 | 4.666172612 | Up | 0        | 0        | AGAP013200-PA OS=Anopheles gambiae GN=AgaP_AGAP013200 PE=4 SV=1                          |
| CCG028274.1 | 2353 | 513 | 2247 | 9.36824218 | 33.38344577 | 1.833282597 | Up | 0        | 0        | AAEL006363-PA OS=Aedes aegypti GN=AAEL006363 PE=4 SV=1                                   |
| CCG017904.2 | 1890 | 555 | 2248 | 12.6180967 | 41.58000327 | 1.720395563 | Up | 0        | 0        | Putative uncharacterized protein OS=Culex quinquefasciatus GN=CpipJ_CPIJ004720 PE=4 SV=1 |



|             |      |       |      |            |             |              |      |          |          |                                                                      |
|-------------|------|-------|------|------------|-------------|--------------|------|----------|----------|----------------------------------------------------------------------|
| CCG006965.1 | 2951 | 624   | 2248 | 9.08611128 | 26.63036468 | 1.551337305  | Up   | 0        | 0        | AAEL012743-PA OS=Aedes aegypti GN=AAEL012743 PE=4 SV=1               |
| CCG017993.1 | 1739 | 769   | 2248 | 19.0015675 | 45.19045784 | 1.249899736  | Up   | 6.41E-13 | 1.63E-12 | NMD protein OS=Aedes aegypti PE=2 SV=1                               |
| CCG018761.1 | 4404 | 702   | 2249 | 6.84939911 | 17.85221718 | 1.382053929  | Up   | 6.78E-13 | 1.71E-12 | AAEL010022-PA OS=Aedes aegypti GN=AAEL010022 PE=4 SV=1               |
| CCG020507.1 | 926  | 252   | 2252 | 11.6937075 | 85.01732105 | 2.862024392  | Up   | 5.42E-14 | 1.81E-13 | -                                                                    |
| CCG025250.1 | 2310 | 557   | 2252 | 10.3611005 | 34.08053649 | 1.717770799  | Up   | 5.29E-13 | 1.37E-12 | AAEL001848-PA (Fragment) OS=Aedes aegypti GN=AAEL001848 PE=4 SV=1    |
| CCG014048.1 | 3846 | 876   | 2254 | 9.78717824 | 20.48776803 | 1.065797944  | Up   | 1.44E-12 | 3.49E-12 | AAEL011480-PA OS=Aedes aegypti GN=AAEL011480 PE=4 SV=1               |
| CCG012612.1 | 2628 | 752   | 2256 | 12.2957536 | 30.0098449  | 1.287275705  | Up   | 1.67E-12 | 4.00E-12 | AAEL000198-PA OS=Aedes aegypti GN=AAEL000198 PE=4 SV=1               |
| CCG007643.1 | 1047 | 10    | 2259 | 0.41040816 | 75.42573756 | 7.521853664  | Up   | 5.43E-07 | 1.01E-06 | AAEL005606-PA OS=Aedes aegypti GN=AAEL005606 PE=4 SV=1               |
| CCG015940.1 | 5799 | 128   | 2259 | 0.94846112 | 13.617994   | 3.843781759  | Up   | 4.15E-14 | 1.42E-13 | AAEL011505-PA (Fragment) OS=Aedes aegypti GN=AAEL011505 PE=4 SV=1    |
| CCG026368.1 | 2636 | 280   | 2260 | 4.56431172 | 29.97181544 | 2.715137244  | Up   | 0        | 0        | AAEL014423-PA (Fragment) OS=Aedes aegypti GN=AAEL014423 PE=4 SV=1    |
| CCG026633.2 | 1642 | 4752  | 2260 | 124.355773 | 48.11553319 | -1.36989886  | Down | 0        | 0        | AAEL003453-PA OS=Aedes aegypti GN=AAEL003453 PE=4 SV=1               |
| CCG004104.1 | 786  | 468   | 2261 | 25.5850328 | 100.5606409 | 1.974693761  | Up   | 5.00E-13 | 1.30E-12 | 60S ribosomal protein L2/L8 OS=Aedes aegypti GN=AAEL000987 PE=2 SV=1 |
| CCG001501.1 | 2191 | 12155 | 2262 | 238.382987 | 36.09111002 | -2.723565855 | Down | 0        | 0        | AAEL010037-PA OS=Aedes aegypti GN=AAEL010037 PE=3 SV=1               |
| CCG000413.3 | 2718 | 506   | 2266 | 7.99951645 | 29.14475908 | 1.865251775  | Up   | 3.38E-13 | 9.20E-13 | AAEL003911-PA OS=Aedes aegypti GN=AAEL003911 PE=4 SV=1               |
| CCG004792.1 | 3213 | 870   | 2266 | 11.6351289 | 24.65467014 | 1.083373759  | Up   | 0        | 0        | AAEL000622-PA OS=Aedes aegypti GN=AAEL000622 PE=4 SV=1               |
| CCG025253.1 | 1241 | 451   | 2267 | 15.6159148 | 63.86012364 | 2.031898256  | Up   | 1.51E-12 | 3.65E-12 | AAEL007469-PA OS=Aedes aegypti GN=AAEL007469 PE=4 SV=1               |

|             |      |     |      |            |             |             |    |          |            |                                                                                                   |
|-------------|------|-----|------|------------|-------------|-------------|----|----------|------------|---------------------------------------------------------------------------------------------------|
| CCG004051.1 | 2964 | 528 | 2267 | 7.65452762 | 26.73765636 | 1.80448776  | Up | 0        | 0          | AAEL009428-PA (Fragment)<br>OS=Aedes aegypti<br>GN=AAEL009428 PE=4 SV=1                           |
| CCG013303.1 | 2706 | 759 | 2267 | 12.0524865 | 29.28692293 | 1.280925804 | Up | 1.54E-12 | 3.70E-12   | AGAP007911-PA (Fragment)<br>OS=Anopheles gambiae<br>GN=AGAP007911 PE=4 SV=3                       |
| CCG002316.1 | 3954 | 467 | 2269 | 5.07507994 | 20.06078149 | 1.982875358 | Up | 5.22E-14 | 1.75E-13   | AAEL003079-PA (Fragment)<br>OS=Aedes aegypti<br>GN=AAEL003079 PE=3 SV=1                           |
| CCG014559.1 | 2805 | 759 | 2269 | 11.6271047 | 28.27819251 | 1.282198022 | Up | 1.54E-12 | 3.70E-12   | AAEL013138-PA OS=Aedes<br>aegypti GN=AAEL013138 PE=4<br>SV=1                                      |
| CCG026012.1 | 1872 | 318 | 2273 | 7.29934594 | 42.44666832 | 2.539812217 | Up | 1.20E-13 | 3.69E-13   | AAEL011114-PA OS=Aedes<br>aegypti GN=AAEL011114 PE=4<br>SV=1                                      |
| CCG006080.1 | 1506 | 199 | 2275 | 5.6779397  | 52.80881783 | 3.217339413 | Up | 0        | 0          | Ubiquitin carboxyl-terminal<br>hydrolase OS=Aedes aegypti<br>GN=AAEL002698 PE=3 SV=1              |
| CCG020337.1 | 1121 | 163 | 2276 | 6.2480524  | 70.97684026 | 3.505869892 | Up | 1.80E-13 | 5.25E-13   | AAEL015143-PA OS=Aedes<br>aegypti GN=AAEL015143 PE=2<br>SV=1                                      |
| CCG019113.1 | 969  | 98  | 2277 | 4.34575231 | 82.14653892 | 4.240521936 | Up | 0        | 0          | AAEL002142-PA OS=Aedes<br>aegypti GN=AAEL002142 PE=4<br>SV=1                                      |
| CCG028477.1 | 2467 | 122 | 2278 | 2.12497269 | 32.28007884 | 3.925127898 | Up | 8.04E-14 | 2.58E-13   | AAEL010342-PA OS=Aedes<br>aegypti GN=AAEL010342 PE=4<br>SV=1                                      |
| CCG007593.1 | 2398 | 271 | 2279 | 4.8560459  | 33.22348322 | 2.774349372 | Up | 0        | 0          | AAEL012489-PA OS=Aedes<br>aegypti GN=AAEL012489 PE=4<br>SV=1                                      |
| CCG006420.1 | 1434 | 1   | 2280 | 0.02996495 | 55.58219738 | 10.85713131 | Up | 0.000587 | 0.00091586 | Tubulin alpha-2 chain OS=Culex<br>quinquefasciatus<br>GN=CpipJ_CPIJ004534 PE=3<br>SV=1            |
| CCG005913.1 | 3054 | 638 | 2281 | 8.97665052 | 26.10996376 | 1.540351321 | Up | 0        | 0          | Putative uncharacterized protein<br>OS=Culex quinquefasciatus<br>GN=CpipJ_CPIJ010636 PE=4<br>SV=1 |
| CCG001803.4 | 2759 | 920 | 2281 | 14.3284363 | 28.90171414 | 1.012273884 | Up | 1.78E-12 | 4.26E-12   | AAEL006744-PA (Fragment)<br>OS=Aedes aegypti<br>GN=AAEL006744 PE=4 SV=1                           |
| CCG024462.1 | 972  | 275 | 2283 | 12.1570751 | 82.10879205 | 2.75574054  | Up | 4.31E-13 | 1.14E-12   | AAEL009153-PA OS=Aedes<br>aegypti GN=AAEL009153 PE=4<br>SV=1                                      |

|             |       |      |      |            |             |              |      |           |           |                                                                   |
|-------------|-------|------|------|------------|-------------|--------------|------|-----------|-----------|-------------------------------------------------------------------|
| CCG013046.1 | 2871  | 327  | 2285 | 4.8941495  | 27.82294059 | 2.507144828  | Up   | 6.36E-13  | 1.62E-12  | AAEL011240-PA OS=Aedes aegypti GN=AAEL011240 PE=4 SV=1            |
| CCG011874.1 | 2103  | 3808 | 2287 | 77.8072988 | 38.0169182  | -1.033263909 | Down | 9.11E-168 | 5.28E-167 | AAEL003588-PA OS=Aedes aegypti GN=AAEL003588 PE=4 SV=1            |
| CCG016462.1 | 951   | 239  | 2289 | 10.7989133 | 84.1424769  | 2.961948143  | Up   | 6.72E-13  | 1.70E-12  | AAEL004305-PA OS=Aedes aegypti GN=AAEL004305 PE=4 SV=1            |
| CCG006297.1 | 2004  | 163  | 2290 | 3.49504328 | 39.94733224 | 3.514716933  | Up   | 1.80E-13  | 5.24E-13  | AAEL013741-PA OS=Aedes aegypti GN=AAEL013741 PE=4 SV=1            |
| CCG027501.1 | 2007  | 346  | 2290 | 7.40783666 | 39.88762023 | 2.428816859  | Up   | 2.24E-13  | 6.40E-13  | AAEL010781-PA OS=Aedes aegypti GN=AAEL010781 PE=4 SV=1            |
| CCG020466.1 | 14498 | 395  | 2291 | 1.17071632 | 5.524169684 | 2.238366104  | Up   | 0         | 0         | AAEL014249-PA OS=Aedes aegypti GN=AAEL014249 PE=4 SV=1            |
| CCG020242.1 | 1020  | 358  | 2293 | 15.0815343 | 78.5875771  | 2.381518066  | Up   | 1.30E-13  | 3.97E-13  | AAEL007055-PA OS=Aedes aegypti GN=AAEL007055 PE=3 SV=1            |
| CCG017526.1 | 2925  | 624  | 2294 | 9.16687672 | 27.41685023 | 1.580560661  | Up   | 0         | 0         | AAEL010018-PA (Fragment) OS=Aedes aegypti GN=AAEL010018 PE=4 SV=1 |
| CCG024663.1 | 1482  | 15   | 2296 | 0.43491634 | 54.15938156 | 6.960329535  | Up   | 1.48E-08  | 2.92E-08  | AAEL004396-PA (Fragment) OS=Aedes aegypti GN=GPROAR4 PE=3 SV=2    |
| CCG017524.1 | 4716  | 444  | 2296 | 4.04549664 | 17.0195512  | 2.072804264  | Up   | 6.43E-13  | 1.64E-12  | AAEL014851-PA (Fragment) OS=Aedes aegypti GN=AAEL014851 PE=4 SV=1 |
| CCG024912.1 | 3553  | 607  | 2296 | 7.34101574 | 22.59054418 | 1.621667424  | Up   | 0         | 0         | AAEL011480-PA OS=Aedes aegypti GN=AAEL011480 PE=4 SV=1            |
| CCG001292.1 | 1488  | 722  | 2297 | 20.8495621 | 53.96449042 | 1.371993318  | Up   | 0         | 0         | AAEL007022-PA OS=Aedes aegypti GN=AAEL007022 PE=4 SV=1            |
| CCG004446.1 | 2371  | 882  | 2298 | 15.9845238 | 33.88195699 | 1.083841441  | Up   | 1.00E-12  | 2.48E-12  | AAEL001824-PA OS=Aedes aegypti GN=AAEL001824 PE=4 SV=1            |
| CCG005006.1 | 393   | 878  | 2299 | 95.998542  | 204.5014715 | 1.091026825  | Up   | 8.17E-13  | 2.04E-12  | AAEL015100-PA OS=Aedes aegypti GN=AAEL015100 PE=3 SV=1            |
| CCG004348.1 | 7841  | 5841 | 2299 | 32.0094656 | 10.24985057 | -1.642895715 | Down | 0         | 0         | AAEL005017-PA OS=Aedes aegypti GN=AAEL005017 PE=4 SV=1            |
| CCG009672.1 | 23302 | 8207 | 2299 | 15.1340062 | 3.449020612 | -2.133535283 | Down | 0         | 0         | Glutathione peroxidase OS=Aedes aegypti GN=GPx PE=2 SV=1          |

|             |      |      |      |            |             |              |      |          |          |                                                                                              |
|-------------|------|------|------|------------|-------------|--------------|------|----------|----------|----------------------------------------------------------------------------------------------|
| CCG013500.1 | 3792 | 218  | 2302 | 2.47030647 | 21.22203405 | 3.102800997  | Up   | 0        | 0        | AAEL012508-PA OS=Aedes aegypti GN=AAEL012508 PE=4 SV=1                                       |
| CCG015864.1 | 2283 | 375  | 2302 | 7.05810358 | 35.24921293 | 2.320238537  | Up   | 0        | 0        | AAEL007638-PA OS=Aedes aegypti GN=AAEL007638 PE=4 SV=1                                       |
| CCG023410.1 | 4181 | 552  | 2302 | 5.67311493 | 19.24753722 | 1.762460865  | Up   | 0        | 0        | Translocase of outer membrane 34 OS=Culex quinquefasciatus GN=CpipJ_CPIJ001395 PE=4 SV=1     |
| CCG016639.1 | 1431 | 7    | 2305 | 0.21019437 | 56.3094535  | 8.065509317  | Up   | 4.31E-06 | 7.70E-06 | AAEL005325-PA OS=Aedes aegypti GN=AAEL005325 PE=4 SV=1                                       |
| CCG001891.1 | 1737 | 237  | 2305 | 5.86288262 | 46.3896534  | 2.98412099   | Up   | 2.32E-13 | 6.61E-13 | AAEL011180-PA OS=Aedes aegypti GN=AAEL011180 PE=4 SV=1                                       |
| CCG004440.1 | 2043 | 220  | 2310 | 4.6271863  | 39.52697961 | 3.094630627  | Up   | 4.61E-13 | 1.20E-12 | Queuine tRNA-ribosyltransferase OS=Aedes aegypti GN=AAEL010993 PE=3 SV=1                     |
| CCG026235.1 | 2721 | 214  | 2311 | 3.37946461 | 29.69076723 | 3.135147762  | Up   | 0        | 0        | B-box type zinc-finger protein hci-1 OS=Culex quinquefasciatus GN=CpipJ_CPIJ001613 PE=4 SV=1 |
| CCG014040.1 | 2382 | 239  | 2311 | 4.31140494 | 33.91627944 | 2.97574794   | Up   | 6.72E-13 | 1.70E-12 | AAEL002082-PA (Fragment) OS=Aedes aegypti GN=AAEL002082 PE=4 SV=1                            |
| CCG021789.1 | 2979 | 192  | 2316 | 2.76944916 | 27.17803592 | 3.294770241  | Up   | 0        | 0        | AAEL006610-PA OS=Aedes aegypti GN=AAEL006610 PE=4 SV=1                                       |
| CCG010348.1 | 2064 | 87   | 2318 | 1.81122428 | 39.26031277 | 4.438034559  | Up   | 0        | 0        | Putative uncharacterized protein GLEAN_08099 OS=Tribolium castaneum GN=GLEAN_08099 PE=4 SV=1 |
| CCG002136.1 | 4425 | 172  | 2318 | 1.67023601 | 18.31260691 | 3.4547133    | Up   | 1.35E-13 | 4.09E-13 | AAEL014694-PA OS=Aedes aegypti GN=AAEL014694 PE=4 SV=1                                       |
| CCG023472.1 | 1325 | 4868 | 2318 | 157.869183 | 61.15719665 | -1.368135398 | Down | 0        | 0        | Acetyl-CoA acetyltransferase OS=Aedes aegypti PE=2 SV=1                                      |
| CCG013000.1 | 2155 | 352  | 2321 | 7.01872231 | 37.65111851 | 2.423412393  | Up   | 5.16E-13 | 1.34E-12 | Tubulin gamma chain OS=Aedes aegypti GN=AAEL012843 PE=3 SV=1                                 |
| CCG027886.2 | 1635 | 490  | 2321 | 12.8777798 | 49.62578617 | 1.946206072  | Up   | 0        | 0        | AAEL001830-PA OS=Aedes aegypti GN=AAEL001830 PE=4 SV=1                                       |

|             |       |      |      |            |             |              |      |           |           |                                                                                                   |
|-------------|-------|------|------|------------|-------------|--------------|------|-----------|-----------|---------------------------------------------------------------------------------------------------|
| CCG018404.1 | 1613  | 559  | 2322 | 14.8915571 | 50.32431411 | 1.756760988  | Up   | 3.87E-13  | 1.03E-12  | AGAP009439-PA (Fragment)<br>OS=Anopheles gambiae<br>GN=AGAP009439 PE=4 SV=4                       |
| CCG019866.1 | 3726  | 862  | 2322 | 9.94093163 | 21.78559277 | 1.131921402  | Up   | 0         | 0         | AAEL003433-PA OS=Aedes<br>aegypti GN=AAEL003433 PE=3<br>SV=1                                      |
| CCG010939.1 | 1829  | 3788 | 2325 | 88.993633  | 44.43848742 | -1.001892411 | Down | 1.13E-158 | 6.48E-158 | AAEL012845-PA OS=Aedes<br>aegypti GN=AAEL012845 PE=4<br>SV=1                                      |
| CCG020133.1 | 2087  | 168  | 2326 | 3.45899157 | 38.96164436 | 3.493631163  | Up   | 1.45E-13  | 4.33E-13  | AGAP001938-PA OS=Anopheles<br>gambiae GN=AgaP_AGAP001938<br>PE=4 SV=4                             |
| CCG025014.1 | 1287  | 934  | 2326 | 31.183941  | 63.18022671 | 1.018669846  | Up   | 3.46E-13  | 9.35E-13  | AAEL009470-PA (Fragment)<br>OS=Aedes aegypti<br>GN=AAEL009470 PE=4 SV=1                           |
| CCG011710.1 | 2172  | 440  | 2327 | 8.70473445 | 37.45299726 | 2.105208986  | Up   | 0         | 0         | AAEL010723-PA (Fragment)<br>OS=Aedes aegypti<br>GN=AAEL010723 PE=4 SV=1                           |
| CCG004553.1 | 1281  | 469  | 2327 | 15.7320886 | 63.50344266 | 2.013124587  | Up   | 0         | 0         | AAEL001888-PA OS=Aedes<br>aegypti GN=AAEL001888 PE=4<br>SV=1                                      |
| CCG010226.1 | 4908  | 784  | 2329 | 6.86395109 | 16.58879923 | 1.273098284  | Up   | 0         | 0         | Putative uncharacterized protein<br>OS=Culex quinquefasciatus<br>GN=CpipJ_CPIJ001658 PE=4<br>SV=1 |
| CCG016734.1 | 2067  | 138  | 2330 | 2.86880666 | 39.40628199 | 3.779902987  | Up   | 1.49E-13  | 4.45E-13  | AAEL011062-PA OS=Aedes<br>aegypti GN=AAEL011062 PE=4<br>SV=1                                      |
| CCG022841.1 | 19137 | 923  | 2330 | 2.0724808  | 4.256298525 | 1.038240606  | Up   | 0         | 0         | AAEL012151-PA (Fragment)<br>OS=Aedes aegypti<br>GN=AAEL012151 PE=4 SV=1                           |
| CCG012298.1 | 4224  | 570  | 2331 | 5.79847271 | 19.29160586 | 1.734228384  | Up   | 7.69E-13  | 1.93E-12  | Uncharacterized protein<br>OS=Anopheles darlingi<br>GN=AND_20180 PE=4 SV=1                        |
| CCG027243.1 | 3165  | 502  | 2332 | 6.81542078 | 25.75756759 | 1.918121723  | Up   | 6.14E-13  | 1.57E-12  | Putative uncharacterized protein<br>OS=Culex quinquefasciatus<br>GN=CpipJ_CPIJ013215 PE=4<br>SV=1 |
| CCG017706.1 | 2214  | 803  | 2332 | 15.5847773 | 36.82145503 | 1.2404091    | Up   | 2.24E-13  | 6.41E-13  | Uncharacterized protein<br>OS=Anopheles darlingi<br>GN=AND_11718 PE=4 SV=1                        |

|             |      |       |      |            |             |              |      |           |           |                                                                                          |
|-------------|------|-------|------|------------|-------------|--------------|------|-----------|-----------|------------------------------------------------------------------------------------------|
| CCG005472.1 | 1716 | 285   | 2333 | 7.1365818  | 47.52777372 | 2.735465687  | Up   | 4.57E-13  | 1.20E-12  | AAEL004489-PA OS=Aedes aegypti GN=AAEL004489 PE=4 SV=1                                   |
| CCG007011.1 | 3402 | 273   | 2336 | 3.44818858 | 24.00427235 | 2.799380622  | Up   | 1.53E-14  | 5.41E-14  | AAEL003896-PA OS=Aedes aegypti GN=AAEL003896 PE=4 SV=1                                   |
| CCG026382.1 | 4449 | 565   | 2336 | 5.45693415 | 18.35525613 | 1.750030705  | Up   | 4.06E-13  | 1.08E-12  | AAEL002260-PA (Fragment) OS=Aedes aegypti GN=AAEL002260 PE=4 SV=1                        |
| CCG000005.1 | 7405 | 4605  | 2336 | 26.7218944 | 11.02802627 | -1.276847678 | Down | 4.20E-284 | 2.63E-283 | Putative uncharacterized protein OS=Culex quinquefasciatus GN=CpipJ_CPIJ002312 PE=4 SV=1 |
| CCG000673.1 | 1365 | 188   | 2337 | 5.9181759  | 59.85164309 | 3.338166371  | Up   | 1.80E-13  | 5.24E-13  | AAEL003645-PA OS=Aedes aegypti GN=AAEL003645 PE=3 SV=1                                   |
| CCG015968.1 | 531  | 244   | 2337 | 19.7450381 | 153.8559187 | 2.962017885  | Up   | 2.78E-13  | 7.73E-13  | Histone H2A OS=Anopheles gambiae GN=AGAP000306 PE=3 SV=3                                 |
| CCG001255.2 | 1345 | 25834 | 2337 | 825.338382 | 60.74163035 | -3.764228197 | Down | 0         | 0         | AAEL013613-PA OS=Aedes aegypti GN=AAEL013613 PE=4 SV=1                                   |
| CCG008287.1 | 1668 | 842   | 2339 | 21.6909572 | 49.02122864 | 1.176312927  | Up   | 0         | 0         | AAEL013132-PB OS=Aedes aegypti GN=AAEL013132 PE=4 SV=1                                   |
| CCG019096.1 | 603  | 8369  | 2339 | 596.37431  | 135.6010106 | -2.136850182 | Down | 0         | 0         | AAEL002309-PA OS=Aedes aegypti GN=TPX4 PE=4 SV=1                                         |
| CCG025204.3 | 1611 | 14134 | 2339 | 376.992073 | 50.75568552 | -2.892892843 | Down | 0         | 0         | AAEL014616-PA OS=Aedes aegypti GN=CYP9J27 PE=3 SV=1                                      |
| CCG001876.1 | 2907 | 586   | 2341 | 8.66194169 | 28.1518149  | 1.700465569  | Up   | 0         | 0         | AAEL014709-PA OS=Aedes aegypti GN=AAEL014709 PE=3 SV=1                                   |
| CCG011805.1 | 1465 | 628   | 2341 | 18.4197907 | 55.86165592 | 1.600601674  | Up   | 1.62E-13  | 4.77E-13  | Putative uncharacterized protein OS=Culex quinquefasciatus GN=CpipJ_CPIJ013237 PE=4 SV=1 |
| CCG012693.1 | 1161 | 377   | 2342 | 13.9531352 | 70.51876331 | 2.337417851  | Up   | 4.66E-13  | 1.21E-12  | AAEL009569-PA OS=Aedes aegypti GN=AAEL009569 PE=4 SV=1                                   |
| CCG013546.1 | 1675 | 15515 | 2344 | 398.015184 | 48.92071687 | -3.024306018 | Down | 0         | 0         | AAEL009951-PA OS=Aedes aegypti GN=AAEL009951 PE=4 SV=1                                   |
| CCG002338.1 | 2520 | 844   | 2347 | 14.3914508 | 32.55836333 | 1.177816142  | Up   | 1.09E-12  | 2.67E-12  | AAEL005998-PB (Fragment) OS=Aedes aegypti GN=AAEL005998 PE=4 SV=1                        |

|             |       |     |      |            |             |             |    |          |          |                                                                                |
|-------------|-------|-----|------|------------|-------------|-------------|----|----------|----------|--------------------------------------------------------------------------------|
| CCG010155.2 | 10850 | 607 | 2349 | 2.40392893 | 7.568386372 | 1.654591496 | Up | 0        | 0        | AAEL008687-PA OS=Aedes aegypti GN=AAEL008687 PE=4 SV=1                         |
| CCG016772.1 | 2272  | 410 | 2352 | 7.75422147 | 36.18920201 | 2.222505449 | Up | 1.25E-12 | 3.04E-12 | CK31 complex subunit b OS=Culex quinquefasciatus GN=CpipJ_CPIJ000780 PE=4 SV=1 |
| CCG006311.1 | 1680  | 802 | 2353 | 20.5129328 | 48.96239598 | 1.255140383 | Up | 7.06E-13 | 1.78E-12 | Apyrase OS=Culex quinquefasciatus GN=CpipJ_CPIJ011013 PE=3 SV=1                |
| CCG012803.2 | 3072  | 888 | 2353 | 12.4209389 | 26.7763103  | 1.108182943 | Up | 0        | 0        | AAEL002782-PA (Fragment) OS=Aedes aegypti GN=AAEL002782 PE=4 SV=1              |
| CCG018570.1 | 3461  | 431 | 2354 | 5.35104178 | 23.77688053 | 2.15166775  | Up | 0        | 0        | AGAP006599-PA OS=Anopheles gambiae GN=AGAP006599 PE=4 SV=4                     |
| CCG018197.1 | 1861  | 466 | 2355 | 10.7597508 | 44.23790532 | 2.039638404 | Up | 0        | 0        | AAEL002658-PA OS=Aedes aegypti GN=AAEL002658 PE=4 SV=1                         |
| CCG006124.1 | 28961 | 701 | 2356 | 1.04008094 | 2.843883156 | 1.451166394 | Up | 1.08E-12 | 2.64E-12 | AAEL013441-PA OS=Aedes aegypti GN=TOLL9A PE=4 SV=2                             |
| CCG011173.1 | 1323  | 338 | 2357 | 10.9779065 | 62.28016504 | 2.504169811 | Up | 1.44E-13 | 4.32E-13 | AAEL008375-PA OS=Aedes aegypti GN=AAEL008375 PE=4 SV=1                         |
| CCG009657.1 | 1957  | 586 | 2357 | 12.8667677 | 42.10355562 | 1.710292393 | Up | 0        | 0        | Uncharacterized protein OS=Anopheles darlingi GN=AND_18280 PE=4 SV=1           |
| CCG018322.1 | 1653  | 247 | 2359 | 6.42076494 | 49.88903503 | 2.957905675 | Up | 0        | 0        | AAEL003676-PA OS=Aedes aegypti GN=AAEL003676 PE=4 SV=1                         |
| CCG022155.1 | 6846  | 665 | 2359 | 4.17395173 | 12.04595018 | 1.529062377 | Up | 3.93E-13 | 1.05E-12 | AAEL013561-PA OS=Aedes aegypti GN=AAEL013561 PE=4 SV=1                         |
| CCG012744.1 | 3738  | 690 | 2359 | 7.93181297 | 22.06168403 | 1.475820355 | Up | 8.73E-13 | 2.18E-12 | AAEL004984-PA OS=Aedes aegypti GN=AAEL004984 PE=4 SV=1                         |
| CCG008227.1 | 1077  | 34  | 2361 | 1.35651901 | 76.63555382 | 5.820032689 | Up | 8.82E-14 | 2.80E-13 | AAEL003179-PA OS=Aedes aegypti GN=AAEL003179 PE=4 SV=1                         |
| CCG005379.2 | 3696  | 50  | 2361 | 0.58130052 | 22.3313018  | 5.26363934  | Up | 0        | 0        | AAEL003893-PA OS=Aedes aegypti GN=AAEL003893 PE=4 SV=1                         |

|             |      |       |      |            |             |              |      |          |          |                                                                                                 |
|-------------|------|-------|------|------------|-------------|--------------|------|----------|----------|-------------------------------------------------------------------------------------------------|
| CCG022890.1 | 6393 | 555   | 2362 | 3.73036176 | 12.9159158  | 1.791762492  | Up   | 0        | 0        | AAEL001467-PA (Fragment)<br>OS=Aedes aegypti<br>GN=AAEL001467 PE=4 SV=1                         |
| CCG003215.3 | 3420 | 11027 | 2364 | 138.545983 | 24.16414219 | -2.519425201 | Down | 0        | 0        | 6-phosphofructokinase OS=Aedes<br>aegypti GN=AAEL006895 PE=3<br>SV=1                            |
| CCG015077.1 | 2043 | 179   | 2365 | 3.76484704 | 40.46809817 | 3.426121895  | Up   | 0        | 0        | in-phase inducer phosphatase 2<br>OS=Culex quinquefasciatus<br>GN=CpipJ_CPIJ001662 PE=4<br>SV=1 |
| CCG006226.1 | 1875 | 528   | 2365 | 12.1002773 | 44.09403977 | 1.865543553  | Up   | 0        | 0        | AAEL011778-PA OS=Aedes<br>aegypti GN=AAEL011778 PE=4<br>SV=1                                    |
| CCG011453.1 | 9861 | 775   | 2366 | 3.37709607 | 8.387717558 | 1.312495062  | Up   | 0        | 0        | AAEL012471-PA OS=Aedes<br>aegypti GN=DOME PE=4 SV=1                                             |
| CCG022905.1 | 690  | 47533 | 2367 | 2960.11651 | 119.9220886 | -4.625484644 | Down | 0        | 0        | AAEL011184-PA OS=Aedes<br>aegypti GN=AAEL011184 PE=3<br>SV=1                                    |
| CCG008928.1 | 1707 | 554   | 2370 | 13.9456549 | 48.53609605 | 1.799242382  | Up   | 9.41E-14 | 2.97E-13 | AAEL001015-PA OS=Aedes<br>aegypti GN=AAEL001015 PE=4<br>SV=1                                    |
| CCG021750.1 | 6147 | 726   | 2370 | 5.07500038 | 13.47830095 | 1.40915881   | Up   | 2.70E-13 | 7.54E-13 | AAEL002392-PA OS=Aedes<br>aegypti GN=AAEL002392 PE=4<br>SV=1                                    |
| CCG027362.1 | 3306 | 772   | 2370 | 10.0340699 | 25.06083362 | 1.32052751   | Up   | 2.17E-12 | 5.16E-12 | AAEL006917-PA OS=Aedes<br>aegypti GN=AAEL006917 PE=4<br>SV=1                                    |
| CCG025493.1 | 3084 | 433   | 2372 | 6.03303991 | 26.88749433 | 2.155978284  | Up   | 9.43E-13 | 2.34E-12 | AAEL005455-PA OS=Aedes<br>aegypti GN=AAEL005455 PE=4<br>SV=1                                    |
| CCG019382.1 | 3660 | 506   | 2372 | 5.94062451 | 22.65601981 | 1.931207924  | Up   | 3.38E-13 | 9.20E-13 | AAEL013888-PA OS=Aedes<br>aegypti GN=AAEL013888 PE=4<br>SV=1                                    |
| CCG003747.1 | 2061 | 493   | 2373 | 10.278544  | 40.25035943 | 1.969365753  | Up   | 6.97E-14 | 2.27E-13 | AAEL011637-PA OS=Aedes<br>aegypti GN=AAEL011637 PE=4<br>SV=1                                    |
| CCG024025.1 | 2715 | 352   | 2374 | 5.57103005 | 30.56756871 | 2.455985805  | Up   | 5.16E-13 | 1.34E-12 | AAEL007558-PA (Fragment)<br>OS=Aedes aegypti<br>GN=AAEL007558 PE=4 SV=1                         |
| CCG000575.1 | 3122 | 531   | 2376 | 7.3084334  | 26.60501781 | 1.864064274  | Up   | 2.40E-13 | 6.77E-13 | AAEL003968-PA OS=Aedes<br>aegypti GN=AAEL003968 PE=4<br>SV=1                                    |
| CCG015416.1 | 1245 | 309   | 2377 | 10.6647775 | 66.74363364 | 2.645776364  | Up   | 6.25E-13 | 1.59E-12 | AAEL013085-PA OS=Aedes<br>aegypti GN=AAEL013085 PE=4<br>SV=1                                    |



|             |       |       |      |            |             |              |      |           |           |                                                                                  |
|-------------|-------|-------|------|------------|-------------|--------------|------|-----------|-----------|----------------------------------------------------------------------------------|
| CCG020797.1 | 2617  | 595   | 2378 | 9.76958047 | 31.76567908 | 1.701100345  | Up   | 7.20E-13  | 1.81E-12  | AAEL009487-PA OS=Aedes aegypti GN=AAEL009487 PE=4 SV=1                           |
| CCG006357.1 | 2587  | 170   | 2380 | 2.82367796 | 32.16107411 | 3.509668126  | Up   | 3.53E-13  | 9.52E-13  | AAEL008706-PA OS=Aedes aegypti GN=AAEL008706 PE=4 SV=1                           |
| CCG015129.1 | 4835  | 922   | 2380 | 8.19402178 | 17.20800387 | 1.070436122  | Up   | 0         | 0         | AAEL001516-PA OS=Aedes aegypti GN=AAEL001516 PE=4 SV=1                           |
| CCG010135.1 | 2142  | 170   | 2383 | 3.4102964  | 38.89149092 | 3.511485504  | Up   | 3.53E-13  | 9.52E-13  | OrfGdpeptide transporter OS=Culex quinquefasciatus GN=CpipJ_CPIJ002172 PE=3 SV=1 |
| CCG003853.1 | 47354 | 4710  | 2384 | 4.27392512 | 1.759947034 | -1.28002962  | Down | 1.16E-291 | 7.26E-291 | AAEL006973-PA OS=Aedes aegypti GN=AAEL006973 PE=4 SV=1                           |
| CCG000584.1 | 3897  | 358   | 2388 | 3.94743777 | 21.42170001 | 2.440084548  | Up   | 1.30E-13  | 3.97E-13  | AAEL006512-PA OS=Aedes aegypti GN=AAEL006512 PE=4 SV=1                           |
| CCG020616.1 | 1508  | 30941 | 2391 | 881.648912 | 55.42787783 | -3.991520586 | Down | 0         | 0         | Phosphoglycerate kinase OS=Aedes aegypti GN=PGK PE=3 SV=1                        |
| CCG005914.1 | 1479  | 50    | 2395 | 1.45266175 | 56.60924467 | 5.284266955  | Up   | 0         | 0         | AAEL012708-PA OS=Aedes aegypti GN=AAEL012708 PE=4 SV=1                           |
| CCG028227.1 | 1074  | 80    | 2397 | 3.20072511 | 78.02140542 | 4.607399303  | Up   | 0         | 0         | AAEL000387-PA OS=Aedes aegypti GN=AAEL000387 PE=4 SV=1                           |
| CCG001434.1 | 13314 | 765   | 2399 | 2.46896853 | 6.2990015   | 1.351214709  | Up   | 0         | 0         | AAEL010074-PA OS=Aedes aegypti GN=AAEL010074 PE=4 SV=1                           |
| CCG000825.1 | 1821  | 54    | 2400 | 1.27422607 | 46.0735114  | 5.176244392  | Up   | 0         | 0         | AAEL007176-PA OS=Aedes aegypti GN=AAEL007176 PE=3 SV=1                           |
| CCG002452.1 | 4406  | 511   | 2401 | 4.98355297 | 19.0501186  | 1.934553411  | Up   | 0         | 0         | AAEL005557-PA OS=Aedes aegypti GN=AAEL005557 PE=4 SV=1                           |
| CCG018908.1 | 1191  | 622   | 2402 | 22.4409529 | 70.5035943  | 1.651562869  | Up   | 0         | 0         | AAEL007422-PA OS=Aedes aegypti GN=AAEL007422 PE=4 SV=1                           |
| CCG017377.1 | 4254  | 194   | 2404 | 1.95959768 | 19.75545307 | 3.333621542  | Up   | 5.97E-13  | 1.53E-12  | AAEL010414-PA OS=Aedes aegypti GN=AAEL010414 PE=4 SV=1                           |
| CCG018013.1 | 827   | 506   | 2412 | 26.2910347 | 101.958118  | 1.955333821  | Up   | 3.38E-13  | 9.20E-13  | Nucleolar protein NOP5 OS=Culex quinquefasciatus GN=CpipJ_CPIJ014566 PE=4 SV=1   |

|             |      |       |      |            |             |              |      |           |           |                                                                                                                |
|-------------|------|-------|------|------------|-------------|--------------|------|-----------|-----------|----------------------------------------------------------------------------------------------------------------|
| CCG026040.3 | 2442 | 693   | 2415 | 12.1941139 | 34.5717602  | 1.503409135  | Up   | 1.99E-12  | 4.75E-12  | 77 kDa echinoderm microtubule-associated protein OS=Culex quinquefasciatus<br>GN=CpipJ_CPIJ005752 PE=4<br>SV=1 |
| CCG006266.1 | 1754 | 5163  | 2415 | 126.483888 | 48.13240502 | -1.393873205 | Down | 0         | 0         | -                                                                                                              |
| CCG023384.1 | 1857 | 183   | 2418 | 4.23449727 | 45.51917783 | 3.426211895  | Up   | 3.05E-13  | 8.41E-13  | Uncharacterized protein<br>OS=Anopheles darlingi<br>GN=AND_16294 PE=4 SV=1                                     |
| CCG012913.1 | 1288 | 315   | 2419 | 10.5089025 | 65.65533502 | 2.643300239  | Up   | 4.28E-13  | 1.13E-12  | AAEL013914-PA OS=Aedes aegypti GN=AAEL013914 PE=4<br>SV=1                                                      |
| CCG028332.1 | 2183 | 215   | 2421 | 4.23201692 | 38.76957768 | 3.195507718  | Up   | 0         | 0         | AAEL000004-PA OS=Aedes aegypti GN=AAEL000004 PE=4<br>SV=1                                                      |
| CCG024806.1 | 603  | 743   | 2423 | 52.9461241 | 140.4708203 | 1.407673493  | Up   | 0         | 0         | AAEL012996-PA OS=Aedes aegypti GN=AAEL012996 PE=2<br>SV=1                                                      |
| CCG000097.1 | 3339 | 913   | 2424 | 11.7494363 | 25.37851539 | 1.111016137  | Up   | 0         | 0         | AGAP004049-PA OS=Anopheles gambiae GN=AgaP_AGAP004049 PE=4 SV=5                                                |
| CCG016546.1 | 5936 | 4113  | 2426 | 29.7733353 | 14.2871933  | -1.059298318 | Down | 1.53E-188 | 9.06E-188 | AAEL005886-PA OS=Aedes aegypti GN=AAEL005886 PE=4<br>SV=1                                                      |
| CCG021294.1 | 3075 | 181   | 2431 | 2.52927544 | 27.6369336  | 3.449801495  | Up   | 1.53E-13  | 4.55E-13  | AAEL013487-PA OS=Aedes aegypti GN=AAEL013487 PE=4<br>SV=1                                                      |
| CCG005154.1 | 1512 | 357   | 2432 | 10.1456318 | 56.22918592 | 2.470460453  | Up   | 3.04E-13  | 8.39E-13  | Nuclear protein nops6<br>OS=Culex quinquefasciatus<br>GN=CpipJ_CPIJ003353 PE=4<br>SV=1                         |
| CCG018294.1 | 1125 | 549   | 2432 | 20.9692305 | 75.57202588 | 1.849578378  | Up   | 2.32E-13  | 6.62E-13  | AAEL012925-PA OS=Aedes aegypti GN=AAEL012925 PE=4<br>SV=1                                                      |
| CCG026770.4 | 2832 | 200   | 2433 | 3.03458578 | 30.03301108 | 3.306977619  | Up   | 0         | 0         | DNA-binding protein smuap-z<br>OS=Culex quinquefasciatus<br>GN=CpipJ_CPIJ012615 PE=4<br>SV=1                   |
| CCG024065.1 | 1587 | 293   | 2435 | 7.93329064 | 53.63793569 | 2.757262406  | Up   | 4.19E-13  | 1.11E-12  | AAEL014904-PA OS=Aedes aegypti GN=AAEL014904 PE=3<br>SV=1                                                      |
| CCG006459.1 | 569  | 11993 | 2438 | 905.687218 | 149.7860787 | -2.596109353 | Down | 0         | 0         | NADH dehydrogenase [ubiquinone] 1 subunit C2<br>OS=Aedes aegypti<br>GN=AAEL005946 PE=2 SV=1                    |

|             |      |      |      |            |             |              |      |           |           |                                                                                          |
|-------------|------|------|------|------------|-------------|--------------|------|-----------|-----------|------------------------------------------------------------------------------------------|
| CCG023777.1 | 3003 | 672  | 2440 | 9.61560495 | 28.40432745 | 1.562661213  | Up   | 0         | 0         | AAEL001636-PA OS=Aedes aegypti GN=AAEL001636 PE=4 SV=1                                   |
| CCG016862.1 | 1647 | 208  | 2442 | 5.42665744 | 51.83249051 | 3.255720971  | Up   | 3.93E-13  | 1.05E-12  | AAEL003670-PA OS=Aedes aegypti GN=AAEL003670 PE=4 SV=1                                   |
| CCG015361.1 | 3637 | 326  | 2443 | 3.85156268 | 23.48173499 | 2.608023198  | Up   | 6.17E-13  | 1.58E-12  | Putative uncharacterized protein OS=Culex quinquefasciatus GN=CpipJ_CPIJ009453 PE=4 SV=1 |
| CCG017137.1 | 2058 | 976  | 2443 | 20.3782609 | 41.49809045 | 1.026014015  | Up   | 2.52E-12  | 5.94E-12  | Probable transport protein Sec61 alpha subunit OS=Aedes aegypti GN=Sec61 PE=2 SV=1       |
| CCG007657.1 | 3030 | 863  | 2446 | 12.2385746 | 28.22044389 | 1.205305143  | Up   | 0         | 0         | AAEL006032-PA OS=Aedes aegypti GN=AAEL006032 PE=4 SV=1                                   |
| CCG019981.1 | 4875 | 4900 | 2451 | 43.1900922 | 17.57594592 | -1.297098061 | Down | 0         | 0         | AAEL005590-PA OS=Aedes aegypti GN=AAEL005590 PE=4 SV=1                                   |
| CCG018804.1 | 840  | 656  | 2452 | 33.5573166 | 102.0448746 | 1.604504463  | Up   | 9.98E-13  | 2.47E-12  | Uncharacterized protein OS=Anopheles darlingi GN=AND_00971 PE=4 SV=1                     |
| CCG015793.1 | 1116 | 759  | 2452 | 29.2240399 | 76.80797011 | 1.394100392  | Up   | 1.54E-12  | 3.70E-12  | AAEL005655-PA OS=Aedes aegypti GN=AAEL005655 PE=4 SV=1                                   |
| CCG020572.1 | 3084 | 700  | 2453 | 9.7531823  | 27.80565918 | 1.511433611  | Up   | 0         | 0         | Subunitase OS=Culex quinquefasciatus GN=CpipJ_CPIJ002113 PE=4 SV=1                       |
| CCG005662.1 | 768  | 19   | 2454 | 1.06305333 | 111.7026187 | 6.715305224  | Up   | 7.73E-10  | 1.60E-09  | AAEL013338-PA OS=Aedes aegypti GN=AAEL013338 PE=3 SV=1                                   |
| CCG003977.1 | 3246 | 130  | 2454 | 1.72090742 | 26.42871571 | 3.940864924  | Up   | 0         | 0         | AAEL009738-PA OS=Aedes aegypti GN=AAEL009738 PE=4 SV=1                                   |
| CCG022210.1 | 1722 | 390  | 2455 | 9.73182143 | 49.83889052 | 2.356490199  | Up   | 6.59E-13  | 1.68E-12  | AAEL000905-PA (Fragment) OS=Aedes aegypti GN=AAEL000905 PE=4 SV=2                        |
| CCG028346.1 | 2115 | 940  | 2455 | 19.0976598 | 40.57804703 | 1.087303566  | Up   | 0         | 0         | AAEL012746-PA OS=Aedes aegypti GN=AAEL012746 PE=3 SV=1                                   |
| CCG012942.1 | 808  | 4284 | 2458 | 227.824682 | 106.3458469 | -1.099160361 | Down | 2.05E-208 | 1.23E-207 | AAEL001969-PA OS=Aedes aegypti GN=AAEL001969 PE=4 SV=1                                   |

|             |       |       |      |            |             |              |      |           |           |                                                                                                                           |
|-------------|-------|-------|------|------------|-------------|--------------|------|-----------|-----------|---------------------------------------------------------------------------------------------------------------------------|
| CCG011685.1 | 2267  | 72    | 2459 | 1.36472029 | 37.91901305 | 4.796244222  | Up   | 0         | 0         | DNA repair and recombination protein pif1, mitochondrial<br>OS=Culex quinquefasciatus<br>GN=CpipJ_CPIJ004811 PE=4<br>SV=1 |
| CCG011942.1 | 2976  | 285   | 2459 | 4.11504515 | 28.88521592 | 2.811351114  | Up   | 4.57E-13  | 1.20E-12  | Predicted protein OS=Culex quinquefasciatus<br>GN=CpipJ_CPIJ015487 PE=4<br>SV=1                                           |
| CCG023976.1 | 5973  | 380   | 2461 | 2.73371826 | 14.40353577 | 2.397486538  | Up   | 0         | 0         | Putative uncharacterized protein OS=Culex quinquefasciatus<br>GN=CpipJ_CPIJ006203 PE=4<br>SV=1                            |
| CCG022359.1 | 1233  | 222   | 2462 | 7.73664321 | 69.8031447  | 3.173512384  | Up   | 0         | 0         | AAEL001495-PA OS=Aedes aegypti GN=AAEL001495 PE=4<br>SV=1                                                                 |
| CCG017127.1 | 7374  | 494   | 2464 | 2.87863424 | 11.68120341 | 2.020732513  | Up   | 0         | 0         | AAEL008398-PA OS=Aedes aegypti GN=AAEL008398 PE=4<br>SV=1                                                                 |
| CCG018628.1 | 39122 | 5962  | 2465 | 6.54837579 | 2.202652018 | -1.571895525 | Down | 0         | 0         | AAEL012064-PA OS=Aedes aegypti GN=AAEL012064 PE=4<br>SV=1                                                                 |
| CCG004309.1 | 1733  | 4583  | 2466 | 113.635484 | 49.74443769 | -1.191806282 | Down | 1.13E-253 | 6.99E-253 | AAEL010148-PA OS=Aedes aegypti GN=AAEL010148 PE=3<br>SV=1                                                                 |
| CCG006251.1 | 3723  | 4626  | 2468 | 53.3918862 | 23.17406046 | -1.204109668 | Down | 3.09E-260 | 1.91E-259 | AAEL010585-PA OS=Aedes aegypti GN=AAEL010585 PE=3<br>SV=1                                                                 |
| CCG018042.1 | 9653  | 283   | 2469 | 1.25975706 | 8.941467456 | 2.827366082  | Up   | 0         | 0         | AAEL012187-PA OS=Aedes aegypti GN=AAEL012187 PE=4<br>SV=1                                                                 |
| CCG005204.1 | 3591  | 492   | 2470 | 5.88724852 | 24.04537556 | 2.030094025  | Up   | 0         | 0         | AAEL006415-PA OS=Aedes aegypti GN=AAEL006415 PE=3<br>SV=1                                                                 |
| CCG014425.2 | 13592 | 12044 | 2470 | 38.075889  | 6.3527769   | -2.583418462 | Down | 0         | 0         | AAEL009232-PA OS=Aedes aegypti GN=AAEL009232 PE=4<br>SV=1                                                                 |
| CCG022162.1 | 2012  | 751   | 2474 | 16.0389019 | 42.98547551 | 1.422273891  | Up   | 0         | 0         | AAEL013553-PA OS=Aedes aegypti GN=AAEL013553 PE=4<br>SV=1                                                                 |
| CCG007620.3 | 2231  | 798   | 2474 | 15.3697213 | 38.76592413 | 1.334698053  | Up   | 1.86E-12  | 4.46E-12  | AAEL010372-PA OS=Aedes aegypti GN=AAEL010372 PE=4<br>SV=1                                                                 |
| CCG001863.1 | 1684  | 189   | 2476 | 4.82261273 | 51.39946157 | 3.413866379  | Up   | 2.34E-13  | 6.64E-13  | AAEL008220-PA OS=Aedes aegypti GN=AAEL008220 PE=4<br>SV=1                                                                 |
| CCG024530.1 | 7848  | 346   | 2476 | 1.89443529 | 11.02914033 | 2.541480575  | Up   | 2.24E-13  | 6.40E-13  | AAEL005814-PA OS=Aedes aegypti GN=AAEL005814 PE=4<br>SV=1                                                                 |

|             |       |       |      |            |             |              |      |          |          |                                                                   |
|-------------|-------|-------|------|------------|-------------|--------------|------|----------|----------|-------------------------------------------------------------------|
| CCG000894.1 | 3624  | 270   | 2478 | 3.20138751 | 23.90358991 | 2.900458079  | Up   | 2.59E-13 | 7.26E-13 | AAEL001436-PA OS=Aedes aegypti GN=AAEL001436 PE=4 SV=1            |
| CCG003867.1 | 11292 | 16052 | 2478 | 61.0830836 | 7.67150282  | -2.993191765 | Down | 0        | 0        | AAEL002436-PA (Fragment) OS=Aedes aegypti GN=AAEL002436 PE=2 SV=1 |
| CCG023083.1 | 32125 | 900   | 2479 | 1.20382136 | 2.697636362 | 1.164074569  | Up   | 4.28E-13 | 1.13E-12 | AAEL014816-PA OS=Aedes aegypti GN=AAEL014816 PE=4 SV=1            |
| CCG018345.1 | 3018  | 463   | 2480 | 6.59210972 | 28.72648323 | 2.123569226  | Up   | 6.16E-13 | 1.57E-12 | AGAP000894-PA OS=Anopheles gambiae GN=AgaP_AGAP000894 PE=4 SV=5   |
| CCG028425.2 | 3559  | 489   | 2482 | 5.90396185 | 24.37944449 | 2.045909949  | Up   | 1.91E-13 | 5.52E-13 | AAEL001416-PA OS=Aedes aegypti GN=AAEL001416 PE=4 SV=1            |
| CCG006512.1 | 816   | 144   | 2483 | 7.58289434 | 106.3742662 | 3.810256749  | Up   | 7.53E-14 | 2.43E-13 | AAEL009235-PA OS=Aedes aegypti GN=AAEL009235 PE=4 SV=1            |
| CCG015459.1 | 2612  | 312   | 2483 | 5.13267887 | 33.23177689 | 2.694779531  | Up   | 9.28E-14 | 2.94E-13 | AAEL003388-PA OS=Aedes aegypti GN=AAEL003388 PE=4 SV=1            |
| CCG015567.1 | 29822 | 545   | 2486 | 0.78527615 | 2.91416659  | 1.891811365  | Up   | 0        | 0        | AAEL008468-PA OS=Aedes aegypti GN=AAEL008468 PE=4 SV=1            |
| CCG014115.1 | 1475  | 850   | 2489 | 24.7622199 | 58.99061077 | 1.252344688  | Up   | 2.37E-12 | 5.61E-12 | AAEL001255-PA OS=Aedes aegypti GN=AAEL001255 PE=4 SV=1            |
| CCG020010.1 | 3069  | 368   | 2491 | 5.15244781 | 28.37441103 | 2.461260554  | Up   | 3.69E-13 | 9.91E-13 | AAEL003108-PA OS=Aedes aegypti GN=AAEL003108 PE=4 SV=1            |
| CCG020055.1 | 2211  | 649   | 2492 | 12.6130067 | 39.40118757 | 1.643326889  | Up   | 1.65E-12 | 3.96E-12 | AGAP002832-PA OS=Anopheles gambiae GN=AgaP_AGAP002832 PE=4 SV=5   |
| CCG010237.1 | 898   | 179   | 2495 | 8.56523663 | 97.12795161 | 3.503321527  | Up   | 0        | 0        | AAEL007951-PA OS=Aedes aegypti GN=GSTe2 PE=2 SV=1                 |
| CCG014843.2 | 4796  | 401   | 2495 | 3.59275721 | 18.18617609 | 2.339678878  | Up   | 1.05E-13 | 3.28E-13 | AAEL010022-PA OS=Aedes aegypti GN=AAEL010022 PE=4 SV=1            |
| CCG014938.1 | 3024  | 639   | 2495 | 9.07991416 | 28.84289039 | 1.667465183  | Up   | 4.28E-13 | 1.13E-12 | AAEL011258-PA OS=Aedes aegypti GN=AAEL011258 PE=4 SV=1            |
| CCG003591.1 | 4611  | 164   | 2496 | 1.5283098  | 18.92341332 | 3.630163418  | Up   | 1.14E-13 | 3.54E-13 | AAEL006211-PA (Fragment) OS=Aedes aegypti GN=AAEL006211 PE=4 SV=1 |

|             |       |       |      |            |             |              |      |          |          |                                                                                                     |
|-------------|-------|-------|------|------------|-------------|--------------|------|----------|----------|-----------------------------------------------------------------------------------------------------|
| CCG020219.1 | 3198  | 403   | 2496 | 5.41488526 | 27.2845087  | 2.333079394  | Up   | 0        | 0        | AAEL001372-PA OS=Aedes aegypti GN=AAEL001372 PE=4 SV=1                                              |
| CCG023315.1 | 1771  | 429   | 2496 | 10.4088177 | 49.26925964 | 2.242881585  | Up   | 0        | 0        | AAEL002867-PA OS=Aedes aegypti GN=AAEL002867 PE=3 SV=1                                              |
| CCG019489.1 | 21627 | 5390  | 2498 | 10.7091538 | 4.037812705 | -1.407198592 | Down | 0        | 0        | AAEL001056-PA OS=Aedes aegypti GN=AAEL001056 PE=4 SV=1                                              |
| CCG017528.1 | 1069  | 836   | 2500 | 33.6040207 | 81.75462295 | 1.282666451  | Up   | 1.21E-12 | 2.95E-12 | AAEL010032-PA (Fragment) OS=Aedes aegypti GN=AAEL010032 PE=2 SV=1                                   |
| CCG016892.1 | 885   | 11534 | 2502 | 560.014598 | 98.83119603 | -2.502426029 | Down | 0        | 0        | AAEL009906-PA OS=Aedes aegypti GN=AAEL009906 PE=4 SV=1                                              |
| CCG014419.1 | 3572  | 692   | 2503 | 8.32448386 | 24.49623929 | 1.557127552  | Up   | 0        | 0        | AAEL004727-PA OS=Aedes aegypti GN=AAEL004727 PE=4 SV=1                                              |
| CCG019775.1 | 13644 | 744   | 2503 | 2.34311658 | 6.413116884 | 1.452596968  | Up   | 0        | 0        | AAEL007041-PA OS=Aedes aegypti GN=AAEL007041 PE=4 SV=1                                              |
| CCG012797.1 | 1317  | 8516  | 2503 | 277.851374 | 66.43930658 | -2.064204455 | Down | 0        | 0        | AAEL010330-PA OS=Aedes aegypti GN=AAEL010330 PE=4 SV=1                                              |
| CCG028381.1 | 2615  | 75    | 2506 | 1.23240157 | 33.50112489 | 4.764665213  | Up   | 0        | 0        | AAEL013544-PA OS=Aedes aegypti GN=AAEL013544 PE=4 SV=1                                              |
| CCG022984.1 | 4066  | 350   | 2506 | 3.69882123 | 21.54585381 | 2.542272791  | Up   | 3.00E-14 | 1.04E-13 | AAEL014265-PA OS=Aedes aegypti GN=AAEL014265 PE=4 SV=1                                              |
| CCG007158.1 | 4734  | 813   | 2507 | 7.37946646 | 18.51296998 | 1.326947943  | Up   | 0        | 0        | Cuniflexin43-interacting protein of 150 kDa OS=Culex quinquefasciatus GN=CpipJ_CPIJ015283 PE=4 SV=1 |
| CCG006587.2 | 1158  | 854   | 2507 | 31.6892516 | 75.68255602 | 1.255967225  | Up   | 1.02E-12 | 2.51E-12 | AAEL000926-PA OS=Aedes aegypti GN=AAEL008928 PE=3 SV=1                                              |
| CCG000133.1 | 2718  | 804   | 2511 | 12.7106941 | 32.29589146 | 1.345307826  | Up   | 2.72E-13 | 7.60E-13 | Fluoperin OS=Culex quinquefasciatus GN=CpipJ_CPIJ004052 PE=4 SV=1                                   |
| CCG000618.1 | 714   | 371   | 2514 | 22.3274111 | 123.0883863 | 2.462806762  | Up   | 5.41E-13 | 1.39E-12 | AAEL000675-PA OS=Aedes aegypti GN=AAEL006751 PE=4 SV=1                                              |
| CCG008925.1 | 2130  | 608   | 2514 | 12.2655393 | 41.26061399 | 1.750154625  | Up   | 1.30E-12 | 3.16E-12 | AAEL000572-PA OS=Aedes aegypti GN=AAEL000572 PE=4 SV=1                                              |

|             |       |      |      |            |             |              |      |           |           |                                                                         |
|-------------|-------|------|------|------------|-------------|--------------|------|-----------|-----------|-------------------------------------------------------------------------|
| CCG019373.1 | 1683  | 418  | 2518 | 10.6722217 | 52.30240102 | 2.293016639  | Up   | 6.74E-13  | 1.70E-12  | AAEL007882-PA OS=Aedes aegypti GN=AAEL007882 PE=4 SV=1                  |
| CCG011410.1 | 15163 | 682  | 2519 | 1.93268872 | 5.807551223 | 1.587320682  | Up   | 1.08E-12  | 2.66E-12  | AAEL009637-PA OS=Aedes aegypti GN=CAT-B3 PE=2 SV=1                      |
| CCG027641.1 | 2217  | 97   | 2520 | 1.88004703 | 39.73606561 | 4.40160838   | Up   | 3.62E-14  | 1.25E-13  | AAEL012725-PA OS=Aedes aegypti GN=AAEL012725 PE=4 SV=1                  |
| CCG012951.1 | 50139 | 4668 | 2521 | 4.00053294 | 1.757709881 | -1.186495239 | Down | 1.65E-256 | 1.02E-255 | AAEL006573-PA OS=Aedes aegypti GN=AAEL006573 PE=4 SV=1                  |
| CCG002115.1 | 3342  | 172  | 2522 | 2.21148844 | 26.38084202 | 3.576401009  | Up   | 1.35E-13  | 4.09E-13  | AAEL010857-PA OS=Aedes aegypti GN=AAEL010857 PE=4 SV=1                  |
| CCG014226.1 | 10046 | 524  | 2524 | 2.24130409 | 8.783066949 | 1.970386397  | Up   | 0         | 0         | AAEL003887-PA OS=Aedes aegypti GN=AAEL003887 PE=4 SV=1                  |
| CCG008769.1 | 1563  | 131  | 2528 | 3.60143009 | 56.54160184 | 3.97267095   | Up   | 1.26E-13  | 3.87E-13  | AAEL010437-PA (Fragment) OS=Aedes aegypti GN=AAEL010437 PE=4 SV=1       |
| CCG001795.1 | 1056  | 595  | 2530 | 24.2111668 | 83.75420477 | 1.790489015  | Up   | 7.20E-13  | 1.81E-12  | AAEL002487-PA OS=Aedes aegypti GN=AAEL002487 PE=2 SV=1                  |
| CCG013400.1 | 1663  | 87   | 2531 | 2.24796567 | 53.20468942 | 4.5648615    | Up   | 0         | 0         | AAEL009654-PA OS=Aedes aegypti GN=AAEL009654 PE=4 SV=1                  |
| CCG015929.1 | 2514  | 298  | 2531 | 5.09346894 | 35.19466926 | 2.788636475  | Up   | 3.92E-13  | 1.05E-12  | Ribonucleoside-diphosphate reductase OS=Aedes aegypti GN=RNR1 PE=2 SV=1 |
| CCG020998.1 | 1161  | 468  | 2532 | 17.3211333 | 76.23975606 | 2.138010174  | Up   | 5.00E-13  | 1.30E-12  | AAEL012955-PA OS=Aedes aegypti GN=AAEL012955 PE=4 SV=1                  |
| CCG015799.1 | 5772  | 388  | 2535 | 2.88847142 | 15.35329723 | 2.410170394  | Up   | 3.43E-13  | 9.27E-13  | AAEL001361-PA (Fragment) OS=Aedes aegypti GN=AAEL001361 PE=4 SV=1       |
| CCG026595.1 | 3228  | 821  | 2535 | 10.9287956 | 27.45329356 | 1.328844824  | Up   | 0         | 0         | AAEL007329-PA OS=Aedes aegypti GN=AAEL007329 PE=4 SV=1                  |
| CCG028390.1 | 19467 | 48   | 2536 | 0.10595096 | 4.55407561  | 5.425689733  | Up   | 5.35E-14  | 1.79E-13  | AAEL009993-PA OS=Aedes aegypti GN=AAEL009993 PE=4 SV=1                  |
| CCG016078.1 | 1527  | 415  | 2538 | 11.6780877 | 58.10354057 | 2.314822031  | Up   | 0         | 0         | AAEL000081-PA (Fragment) OS=Aedes aegypti GN=AAEL000081 PE=3 SV=1       |

|             |      |      |      |            |             |              |      |          |          |                                                                                                       |
|-------------|------|------|------|------------|-------------|--------------|------|----------|----------|-------------------------------------------------------------------------------------------------------|
| CCG019024.1 | 2555 | 359  | 2539 | 6.03762612 | 34.73935997 | 2.52451785   | Up   | 0        | 0        | mystery 45A OS=Culex quinquefasciatus<br>GN=CpipJ_CPIJ001550 PE=4<br>SV=1                             |
| CCG003809.1 | 1830 | 5056 | 2541 | 118.718567 | 48.54042693 | -1.290286884 | Down | 0        | 0        | AAEL013253-PA OS=Aedes aegypti<br>GN=AAEL013253 PE=4<br>SV=2                                          |
| CCG015650.1 | 1587 | 284  | 2545 | 7.68960594 | 56.06100465 | 2.866016025  | Up   | 0        | 0        | AAEL003371-PA OS=Aedes aegypti<br>GN=AAEL003371 PE=4<br>SV=1                                          |
| CCG010633.1 | 1512 | 420  | 2545 | 11.9360374 | 58.84180846 | 2.301517627  | Up   | 1.84E-13 | 5.32E-13 | Nuclear protein nops6 OS=Culex quinquefasciatus<br>GN=CpipJ_CPIJ003353 PE=4<br>SV=1                   |
| CCG025662.1 | 2002 | 485  | 2545 | 10.4097509 | 44.43996723 | 2.093922208  | Up   | 2.07E-13 | 5.94E-13 | AAEL001339-PA OS=Aedes aegypti<br>GN=AAEL001339 PE=4<br>SV=1                                          |
| CCG018470.1 | 6792 | 374  | 2547 | 2.36611907 | 13.10935379 | 2.470001988  | Up   | 1.37E-13 | 4.12E-13 | AAEL010978-PA OS=Aedes aegypti<br>GN=AAEL010978 PE=4<br>SV=1                                          |
| CCG012875.1 | 3714 | 930  | 2549 | 10.7597881 | 23.9926353  | 1.156941956  | Up   | 0        | 0        | Neuropathy target esterase/swiss cheese OS=Culex quinquefasciatus<br>GN=CpipJ_CPIJ003198 PE=4<br>SV=1 |
| CCG023120.1 | 1848 | 8297 | 2550 | 192.922017 | 48.23788191 | -1.999779335 | Down | 0        | 0        | Putative uncharacterized protein OS=Culex quinquefasciatus<br>GN=CpipJ_CPIJ008688 PE=4<br>SV=1        |
| CCG009839.1 | 6030 | 172  | 2552 | 1.22567071 | 14.79494566 | 3.593461063  | Up   | 1.35E-13 | 4.09E-13 | AAEL010499-PA (Fragment) OS=Aedes aegypti<br>GN=AAEL010499 PE=4 SV=1                                  |
| CCG015997.1 | 1738 | 557  | 2554 | 13.771083  | 51.37136874 | 1.899322496  | Up   | 5.29E-13 | 1.37E-12 | AAEL012973-PA OS=Aedes aegypti<br>GN=AAEL012973 PE=4<br>SV=1                                          |
| CCG026396.1 | 2108 | 891  | 2554 | 18.162255  | 42.35457252 | 1.221574392  | Up   | 0        | 0        | AAEL002374-PA OS=Aedes aegypti<br>GN=AAEL002374 PE=4<br>SV=1                                          |
| CCG028025.1 | 2619 | 32   | 2558 | 0.52502158 | 34.14405192 | 6.023113753  | Up   | 1.77E-13 | 5.17E-13 | AAEL013025-PA OS=Aedes aegypti<br>GN=AAEL013025 PE=4<br>SV=1                                          |
| CCG015415.1 | 3523 | 348  | 2558 | 4.24452672 | 25.38270564 | 2.580170257  | Up   | 0        | 0        | AAEL013086-PA OS=Aedes aegypti<br>GN=AAEL013086 PE=4<br>SV=1                                          |
| CCG021780.1 | 3246 | 758  | 2559 | 10.0342141 | 27.55952873 | 1.457623598  | Up   | 0        | 0        | AAEL009061-PA OS=Aedes aegypti<br>GN=AAEL009061 PE=4<br>SV=1                                          |



|             |       |       |      |            |             |              |      |          |          |                                                                                                   |
|-------------|-------|-------|------|------------|-------------|--------------|------|----------|----------|---------------------------------------------------------------------------------------------------|
| CCG024298.1 | 6692  | 577   | 2560 | 3.70495171 | 13.37316027 | 1.85181379   | Up   | 4.04E-13 | 1.07E-12 | Putative uncharacterized protein<br>OS=Culex quinquefasciatus<br>GN=CpipJ_CPIJ013516 PE=4<br>SV=1 |
| CCG002029.1 | 2599  | 863   | 2560 | 14.2681343 | 34.43370086 | 1.27102455   | Up   | 0        | 0        | AAEL009883-PA OS=Aedes<br>aegypti GN=AAEL009883 PE=4<br>SV=1                                      |
| CCG025342.1 | 971   | 14423 | 2560 | 638.262083 | 92.16600261 | -2.791842359 | Down | 0        | 0        | AAEL008002-PA OS=Aedes<br>aegypti GN=AAEL008002 PE=4<br>SV=1                                      |
| CCG004233.1 | 11053 | 202   | 2561 | 0.78529688 | 8.099895668 | 3.366593259  | Up   | 0        | 0        | AAEL008123-PA OS=Aedes<br>aegypti GN=AAEL008123 PE=4<br>SV=1                                      |
| CCG021318.1 | 752   | 977   | 2561 | 55.8263706 | 119.0533867 | 1.092589989  | Up   | 2.38E-12 | 5.63E-12 | AAEL008039-PA OS=Aedes<br>aegypti GN=AAEL008039 PE=4<br>SV=1                                      |
| CCG010096.1 | 4669  | 725   | 2562 | 6.67231904 | 19.1825027  | 1.523530779  | Up   | 0        | 0        | AAEL011145-PA (Fragment)<br>OS=Aedes aegypti<br>GN=AAEL011145 PE=4 SV=1                           |
| CCG023879.1 | 2237  | 208   | 2565 | 3.99539776 | 40.08403215 | 3.326616596  | Up   | 3.93E-13 | 1.05E-12 | AAEL000001-PA OS=Aedes<br>aegypti GN=AAEL000001 PE=4<br>SV=1                                      |
| CCG004901.1 | 628   | 11800 | 2566 | 807.393103 | 142.8390736 | -2.49888058  | Down | 0        | 0        | AAEL000986-PB OS=Aedes<br>aegypti GN=AAEL000986 PE=4<br>SV=1                                      |
| CCG003382.1 | 2741  | 166   | 2567 | 2.60232614 | 32.73910853 | 3.653141353  | Up   | 1.83E-13 | 5.32E-13 | AAEL014051-PA OS=Aedes<br>aegypti GN=AAEL014051 PE=4<br>SV=1                                      |
| CCG013153.1 | 1164  | 141   | 2569 | 5.20509672 | 77.15447855 | 3.889753026  | Up   | 0        | 0        | AAEL004455-PA OS=Aedes<br>aegypti GN=AAEL004455 PE=4<br>SV=1                                      |
| CCG010228.1 | 1440  | 218   | 2570 | 6.50514038 | 62.39081341 | 3.261681523  | Up   | 0        | 0        | AAEL006205-PA OS=Aedes<br>aegypti GN=AAEL006205 PE=4<br>SV=1                                      |
| CCG028444.1 | 3035  | 856   | 2572 | 12.1193057 | 29.62526783 | 1.289521145  | Up   | 1.31E-12 | 3.17E-12 | AAEL014540-PA OS=Aedes<br>aegypti GN=AAEL014540 PE=4<br>SV=1                                      |
| CCG014556.2 | 2498  | 288   | 2573 | 4.95407669 | 36.00786475 | 2.861623944  | Up   | 0        | 0        | AAEL001587-PA OS=Aedes<br>aegypti GN=AAEL001587 PE=4<br>SV=1                                      |
| CCG021880.1 | 1293  | 215   | 2574 | 7.14500614 | 69.59211478 | 3.283916692  | Up   | 0        | 0        | AAEL012235-PA OS=Aedes<br>aegypti GN=AAEL012235 PE=2<br>SV=1                                      |
| CCG023187.1 | 869   | 257   | 2580 | 12.7079652 | 103.7886698 | 3.029844005  | Up   | 4.14E-13 | 1.10E-12 | AAEL009667-PA OS=Aedes<br>aegypti GN=AAEL009667 PE=4<br>SV=1                                      |
| CCG015663.1 | 3285  | 535   | 2580 | 6.99811507 | 27.45581555 | 1.972073473  | Up   | 2.42E-14 | 8.44E-14 | AAEL003901-PA OS=Aedes<br>aegypti GN=AAEL003901 PE=4<br>SV=1                                      |

|             |      |     |      |            |             |             |    |          |          |                                                                               |
|-------------|------|-----|------|------------|-------------|-------------|----|----------|----------|-------------------------------------------------------------------------------|
| CCG008411.1 | 2438 | 898 | 2584 | 15.8272443 | 37.05175848 | 1.227131924 | Up | 2.22E-12 | 5.28E-12 | AAEL003083-PA OS=Aedes aegypti GN=AAEL003083 PE=4 SV=1                        |
| CCG012878.1 | 3747 | 183 | 2585 | 2.09860193 | 24.11719921 | 3.522561931 | Up | 3.05E-13 | 8.41E-13 | AAEL001238-PA OS=Aedes aegypti GN=AAEL001238 PE=4 SV=1                        |
| CCG021018.3 | 5940 | 357 | 2586 | 2.58252445 | 15.21920938 | 2.5590395   | Up | 3.04E-13 | 8.39E-13 | AAEL010633-PA OS=Aedes aegypti GN=AAEL010633 PE=4 SV=1                        |
| CCG010205.1 | 4419 | 447 | 2586 | 4.34656514 | 20.45759306 | 2.234688742 | Up | 3.44E-13 | 9.29E-13 | THO complex subunit 2 OS=Culex quinquefasciatus GN=CpipJ_CPIJ019403 PE=4 SV=1 |
| CCG026416.1 | 2716 | 600 | 2586 | 9.4925776  | 33.2850161  | 1.810001073 | Up | 0        | 0        | Uncharacterized protein OS=Anopheles darlingi GN=AND_01164 PE=4 SV=1          |
| CCG001311.1 | 4620 | 235 | 2588 | 2.18568996 | 19.58268837 | 3.163418159 | Up | 4.34E-13 | 1.14E-12 | AAEL000924-PA OS=Aedes aegypti GN=AAEL000924 PE=4 SV=1                        |
| CCG023468.1 | 3582 | 367 | 2589 | 4.40253841 | 25.26716319 | 2.520856201 | Up | 4.12E-13 | 1.09E-12 | DNA polymerase OS=Culex quinquefasciatus GN=CpipJ_CPIJ018287 PE=3 SV=1        |
| CCG012990.1 | 3567 | 422 | 2592 | 5.08360751 | 25.40281845 | 2.321064018 | Up | 5.52E-13 | 1.42E-12 | AAEL001651-PA OS=Aedes aegypti GN=AAEL001651 PE=4 SV=1                        |
| CCG011145.1 | 957  | 605 | 2593 | 27.1647748 | 94.71976141 | 1.801928363 | Up | 2.07E-13 | 5.93E-13 | AAEL000950-PA OS=Aedes aegypti GN=AAEL000950 PE=4 SV=1                        |
| CCG028138.1 | 2312 | 215 | 2594 | 3.99588795 | 39.22221884 | 3.295083118 | Up | 0        | 0        | AAEL001681-PA OS=Aedes aegypti GN=AAEL001681 PE=4 SV=1                        |
| CCG028452.1 | 3329 | 610 | 2595 | 7.87369724 | 27.25044404 | 1.791166595 | Up | 3.62E-13 | 9.71E-13 | AAEL012019-PA OS=Aedes aegypti GN=AAEL012019 PE=4 SV=1                        |
| CCG004043.2 | 995  | 714 | 2596 | 30.8345633 | 91.20772513 | 1.564607608 | Up | 1.92E-13 | 5.54E-13 | AAEL000932-PA OS=Aedes aegypti GN=AAEL000932 PE=4 SV=1                        |
| CCG016557.1 | 2382 | 129 | 2597 | 2.32707631 | 38.11362081 | 4.033716247 | Up | 0        | 0        | AAEL003071-PA OS=Aedes aegypti GN=AAEL003071 PE=4 SV=1                        |
| CCG013765.1 | 1939 | 346 | 2603 | 7.6676267  | 46.92954845 | 2.613644573 | Up | 2.24E-13 | 6.39E-13 | AAEL011341-PA OS=Aedes aegypti GN=AAEL011341 PE=3 SV=1                        |
| CCG027288.1 | 2140 | 584 | 2603 | 11.7263201 | 42.52167964 | 1.858448241 | Up | 3.10E-13 | 8.52E-13 | AAEL000996-PA OS=Aedes aegypti GN=AAEL000996 PE=4 SV=1                        |
| CCG024931.1 | 5133 | 968 | 2603 | 8.10339044 | 17.7277215  | 1.129409563 | Up | 7.03E-13 | 1.77E-12 | AAEL000152-PA OS=Aedes aegypti GN=AAEL006152 PE=4 SV=1                        |

|             |      |      |      |            |             |              |      |          |          |                                                                                          |
|-------------|------|------|------|------------|-------------|--------------|------|----------|----------|------------------------------------------------------------------------------------------|
| CCG006992.1 | 1869 | 115  | 2604 | 2.64393766 | 48.70591371 | 4.203336886  | Up   | 6.13E-14 | 2.03E-13 | AAEL009508-PA OS=Aedes aegypti GN=AAEL009508 PE=4 SV=1                                   |
| CCG015312.2 | 3517 | 295  | 2605 | 3.60422852 | 25.89317913 | 2.844809717  | Up   | 2.32E-13 | 6.62E-13 | AAEL001324-PA OS=Aedes aegypti GN=AAEL001324 PE=4 SV=1                                   |
| CCG011899.1 | 1956 | 490  | 2605 | 10.7644018 | 46.55741871 | 2.112742922  | Up   | 0        | 0        | AAEL007329-PA OS=Aedes aegypti GN=AAEL007329 PE=4 SV=1                                   |
| CCG008335.1 | 2222 | 1000 | 2607 | 19.3383144 | 41.01540394 | 1.084703787  | Up   | 1.46E-12 | 3.53E-12 | -                                                                                        |
| CCG004360.1 | 5415 | 592  | 2609 | 4.6977069  | 16.84323991 | 1.842141067  | Up   | 4.13E-13 | 1.10E-12 | AAEL008796-PA OS=Aedes aegypti GN=AAEL008796 PE=4 SV=1                                   |
| CCG013455.2 | 4777 | 593  | 2609 | 5.33411192 | 19.09276619 | 1.839706138  | Up   | 1.13E-12 | 2.78E-12 | AAEL008482-PA OS=Aedes aegypti GN=AAEL008482 PE=4 SV=1                                   |
| CCG020701.1 | 3195 | 253  | 2610 | 3.40261122 | 28.55746553 | 3.069153721  | Up   | 3.13E-13 | 8.62E-13 | AAEL003495-PA (Fragment) OS=Aedes aegypti GN=AAEL003495 PE=4 SV=1                        |
| CCG012628.1 | 687  | 479  | 2610 | 29.9599751 | 132.8109205 | 2.14826545   | Up   | 0        | 0        | AAEL012807-PA OS=Aedes aegypti GN=AAEL012807 PE=4 SV=1                                   |
| CCG019913.1 | 2358 | 760  | 2610 | 13.849448  | 38.69427582 | 1.482291687  | Up   | 1.99E-12 | 4.75E-12 | AAEL010912-PA OS=Aedes aegypti GN=AAEL010912 PE=4 SV=1                                   |
| CCG024143.1 | 5595 | 994  | 2615 | 7.63394391 | 16.33885501 | 1.097806393  | Up   | 3.37E-12 | 7.85E-12 | AAEL001141-PA OS=Aedes aegypti GN=AAEL001141 PE=4 SV=1                                   |
| CCG025573.1 | 3762 | 664  | 2616 | 7.58423811 | 24.30910474 | 1.680420598  | Up   | 4.96E-13 | 1.29E-12 | Putative uncharacterized protein OS=Culex quinquefasciatus GN=CpipJ_CPIJ003705 PE=4 SV=1 |
| CCG027591.1 | 3441 | 8564 | 2616 | 106.943565 | 26.57682419 | -2.008609051 | Down | 0        | 0        | AAEL012556-PA OS=Aedes aegypti GN=AAEL012556 PE=4 SV=1                                   |
| CCG016252.1 | 5010 | 513  | 2617 | 4.39989498 | 18.26064078 | 2.053196397  | Up   | 0        | 0        | Rho GTPase-activating protein 5 OS=Culex quinquefasciatus GN=CpipJ_CPIJ009693 PE=4 SV=1  |
| CCG012754.1 | 5073 | 419  | 2618 | 3.54904766 | 18.04075864 | 2.345756152  | Up   | 0        | 0        | AAEL012935-PA OS=Aedes aegypti GN=AAEL012935 PE=4 SV=1                                   |
| CCG007080.1 | 3705 | 673  | 2618 | 7.80529862 | 24.70196183 | 1.662099891  | Up   | 7.17E-14 | 2.33E-13 | Ubiquitin carboxyl-terminal hydrolase OS=Aedes aegypti GN=AAEL009702 PE=3 SV=1           |
| CCG024306.1 | 2742 | 858  | 2620 | 13.4456719 | 33.40287569 | 1.312830463  | Up   | 1.49E-14 | 5.27E-14 | AAEL013581-PA OS=Aedes aegypti GN=AAEL013581 PE=4 SV=1                                   |

|             |       |       |      |            |             |             |      |          |           |                                                                                               |
|-------------|-------|-------|------|------------|-------------|-------------|------|----------|-----------|-----------------------------------------------------------------------------------------------|
| CCG015780.1 | 1695  | 9009  | 2620 | 228.386041 | 54.03580244 | -2.07948696 | Down | 0        | 0         | Mitochondrial NADH:ubiquinone oxidoreductase NDUFV1/51 kDa subunit OS=Aedes aegypti PE=2 SV=1 |
| CCG007531.1 | 1347  | 2     | 2622 | 0.06380065 | 68.04795969 | 10.05876517 | Up   | 9.36E-05 | 0.0001535 | AAEL004172-PA OS=Aedes aegypti GN=AAEL004172 PE=3 SV=1                                        |
| CCG017444.1 | 4932  | 377   | 2624 | 3.28458839 | 18.59905074 | 2.501444495 | Up   | 4.66E-13 | 1.21E-12  | AAEL014774-PA OS=Aedes aegypti GN=AAEL014774 PE=4 SV=1                                        |
| CCG015638.1 | 1137  | 457   | 2624 | 17.2710367 | 80.67767656 | 2.223814853 | Up   | 1.13E-12 | 2.77E-12  | AAEL008739-PA OS=Aedes aegypti GN=AAEL008739 PE=4 SV=1                                        |
| CCG012836.1 | 19192 | 783   | 2628 | 1.75308994 | 4.786908678 | 1.449194267 | Up   | 0        | 0         | AAEL003540-PA OS=Aedes aegypti GN=AAEL003540 PE=4 SV=1                                        |
| CCG008560.1 | 444   | 5     | 2634 | 0.48389341 | 207.3876149 | 8.743424739 | Up   | 1.59E-05 | 2.76E-05  | Histone H2B OS=Aedes aegypti GN=AAEL015682 PE=3 SV=1                                          |
| CCG008598.1 | 3952  | 124   | 2634 | 1.34824066 | 23.2996207  | 4.111156524 | Up   | 1.61E-13 | 4.77E-13  | AAEL004286-PA OS=Aedes aegypti GN=AAEL004286 PE=4 SV=1                                        |
| CCG016408.1 | 1734  | 555   | 2634 | 13.7532888 | 53.10271108 | 1.949008873 | Up   | 0        | 0         | AAEL010345-PA OS=Aedes aegypti GN=AAEL010345 PE=4 SV=1                                        |
| CCG010675.1 | 1128  | 24909 | 2634 | 948.876879 | 81.63129523 | -3.53902665 | Down | 0        | 0         | AAEL002417-PA OS=Aedes aegypti GN=AAEL002417 PE=4 SV=1                                        |
| CCG025450.1 | 14940 | 347   | 2635 | 0.9980253  | 6.165666619 | 2.627108598 | Up   | 0        | 0         | AAEL014053-PA OS=Aedes aegypti GN=AAEL014053 PE=4 SV=1                                        |
| CCG019185.1 | 1299  | 235   | 2638 | 7.77358555 | 70.99302088 | 3.191025107 | Up   | 4.34E-13 | 1.14E-12  | AAEL013546-PA OS=Aedes aegypti GN=AAEL013546 PE=3 SV=1                                        |
| CCG024509.1 | 4221  | 943   | 2638 | 9.59972986 | 21.84788773 | 1.186428092 | Up   | 1.51E-12 | 3.64E-12  | AAEL012325-PA OS=Aedes aegypti GN=AAEL012325 PE=4 SV=1                                        |
| CCG020346.1 | 1327  | 611   | 2639 | 19.784859  | 69.52139593 | 1.813060269 | Up   | 2.21E-13 | 6.34E-13  | Putative uncharacterized protein OS=Culex quinquefasciatus GN=CpipJ_CPIJ009391 PE=4 SV=1      |
| CCG006929.1 | 888   | 59    | 2642 | 2.85497111 | 104.0087469 | 5.187084906 | Up   | 0        | 0         | AAEL008085-PA OS=Aedes aegypti GN=AAEL008085 PE=2 SV=1                                        |
| CCG001162.2 | 1254  | 497   | 2642 | 17.0302696 | 73.65212698 | 2.112625914 | Up   | 7.04E-14 | 2.29E-13  | -                                                                                             |
| CCG014211.1 | 2469  | 1067  | 2642 | 18.5697476 | 37.40776316 | 1.010383494 | Up   | 2.93E-12 | 6.87E-12  | AAEL003489-PA (Fragment) OS=Aedes aegypti GN=AAEL003489 PE=4 SV=1                             |

|             |       |      |      |            |             |              |      |          |            |                                                                                                 |
|-------------|-------|------|------|------------|-------------|--------------|------|----------|------------|-------------------------------------------------------------------------------------------------|
| CCG019523.1 | 1888  | 868  | 2643 | 19.7551534 | 48.93788427 | 1.308722681  | Up   | 0        | 0          | AAEL006633-PA OS=Aedes aegypti GN=IAP2 PE=4 SV=2                                                |
| CCG017209.1 | 3286  | 323  | 2644 | 4.22374446 | 28.12832738 | 2.735429311  | Up   | 1.55E-13 | 4.61E-13   | AAEL001497-PA (Fragment) OS=Aedes aegypti GN=AAEL001497 PE=4 SV=1                               |
| CCG017692.1 | 603   | 899  | 2644 | 64.0626723 | 153.2830577 | 1.25864236   | Up   | 0        | 0          | AAEL010765-PA OS=Aedes aegypti GN=AAEL010765 PE=4 SV=1                                          |
| CCG014937.1 | 1574  | 455  | 2646 | 12.4213655 | 58.7672175  | 2.242187815  | Up   | 0        | 0          | AAEL011251-PA OS=Aedes aegypti GN=AAEL011251 PE=4 SV=1                                          |
| CCG024496.1 | 5574  | 355  | 2649 | 2.73668026 | 16.61364822 | 2.601870118  | Up   | 2.28E-13 | 6.52E-13   | AAEL014260-PA OS=Aedes aegypti GN=AAEL014260 PE=4 SV=1                                          |
| CCG001921.1 | 1645  | 759  | 2650 | 19.8261572 | 56.31576501 | 1.506133773  | Up   | 1.54E-12 | 3.70E-12   | AAEL001588-PA OS=Aedes aegypti GN=AAEL001588 PE=4 SV=1                                          |
| CCG011356.1 | 2496  | 772  | 2650 | 13.2903186 | 37.11515763 | 1.481632811  | Up   | 2.17E-12 | 5.15E-12   | AAEL008686-PA OS=Aedes aegypti GN=AAEL008686 PE=4 SV=1                                          |
| CCG010797.1 | 3390  | 64   | 2652 | 0.81122803 | 27.34789086 | 5.075178264  | Up   | 0        | 0          | DNA-directed RNA polymerase OS=Culex quinquefasciatus GN=CpipJ_CPIJ002457 PE=3 SV=1             |
| CCG018960.1 | 3315  | 490  | 2654 | 6.35148415 | 27.98771238 | 2.13962792   | Up   | 0        | 0          | AAEL012553-PA OS=Aedes aegypti GN=HOP PE=4 SV=2                                                 |
| CCG010326.1 | 23511 | 7553 | 2654 | 13.804194  | 3.946206735 | -1.806568212 | Down | 0        | 0          | AAEL014378-PA OS=Aedes aegypti GN=AAEL014378 PE=4 SV=1                                          |
| CCG000614.1 | 2209  | 373  | 2655 | 7.25564102 | 42.01639875 | 2.533777529  | Up   | 3.38E-13 | 9.19E-13   | AAEL003377-PA OS=Aedes aegypti GN=AAEL003377 PE=4 SV=1                                          |
| CCG024797.3 | 5194  | 480  | 2655 | 3.97101899 | 17.86950805 | 2.169918754  | Up   | 5.41E-13 | 1.39E-12   | AAEL015099-PA OS=Aedes aegypti GN=AAEL015099 PE=4 SV=1                                          |
| CCG011352.1 | 905   | 2    | 2656 | 0.09496074 | 102.5957824 | 10.07735264  | Up   | 9.36E-05 | 0.00015404 | Cation efflux protein/ zinc transporter OS=Culex quinquefasciatus GN=CpipJ_CPIJ010101 PE=4 SV=1 |
| CCG018953.1 | 1198  | 987  | 2656 | 35.4016094 | 77.50349174 | 1.130446361  | Up   | 3.78E-12 | 8.77E-12   | AAEL006480-PA OS=Aedes aegypti GN=AAEL006480 PE=4 SV=1                                          |
| CCG025951.1 | 1758  | 62   | 2657 | 1.51542864 | 52.83512024 | 5.123699406  | Up   | 0        | 0          | AAEL009454-PA OS=Aedes aegypti GN=AAEL009454 PE=4 SV=1                                          |

|             |      |       |      |            |             |              |      |          |          |                                                                                                      |
|-------------|------|-------|------|------------|-------------|--------------|------|----------|----------|------------------------------------------------------------------------------------------------------|
| CCG015969.1 | 1851 | 89    | 2658 | 2.06607584 | 50.19940554 | 4.602705162  | Up   | 0        | 0        | AAEL015216-PA OS=Aedes aegypti GN=AAEL015216 PE=3 SV=1                                               |
| CCG019719.1 | 7034 | 648   | 2658 | 3.95854251 | 13.20999427 | 1.73858859   | Up   | 0        | 0        | AGAP007731-PA (Fragment) OS=Anopheles gambiae GN=AGAP007731 PE=4 SV=4                                |
| CCG023804.1 | 3264 | 222   | 2661 | 2.92257386 | 28.49999218 | 3.285650132  | Up   | 0        | 0        | AAEL011261-PA OS=Aedes aegypti GN=AAEL011261 PE=4 SV=1                                               |
| CCG017517.1 | 1023 | 5414  | 2661 | 227.407765 | 90.93252638 | -1.322413173 | Down | 0        | 0        | Ca2+-binding protein Regucalcin/SMP30 OS=Aedes aegypti PE=2 SV=1                                     |
| CCG014260.1 | 993  | 5707  | 2663 | 246.956974 | 93.75014204 | -1.397366931 | Down | 0        | 0        | AAEL010684-PA OS=Aedes aegypti GN=AAEL010684 PE=4 SV=1                                               |
| CCG007772.1 | 3894 | 20508 | 2663 | 226.302855 | 23.90700849 | -3.242749265 | Down | 0        | 0        | AAEL009510-PA OS=Aedes aegypti GN=AAEL009510 PE=2 SV=1                                               |
| CCG024200.1 | 606  | 534   | 2666 | 37.8644196 | 153.793343  | 2.022078337  | Up   | 0        | 0        | DNA-directed RNA polymerase subunit OS=Aedes aegypti GN=AAEL001831 PE=2 SV=1                         |
| CCG002169.1 | 681  | 851   | 2666 | 53.6963938 | 136.8557502 | 1.349758947  | Up   | 1.91E-12 | 4.57E-12 | AAEL005512-PA OS=Aedes aegypti GN=AAEL005512 PE=4 SV=1                                               |
| CCG006767.1 | 564  | 390   | 2667 | 29.7131144 | 165.3080215 | 2.475985     | Up   | 6.59E-13 | 1.68E-12 | AAEL003552-PA OS=Aedes aegypti GN=AAEL003552 PE=4 SV=1                                               |
| CCG028267.1 | 4890 | 240   | 2668 | 2.10894403 | 19.07335019 | 3.176965559  | Up   | 0        | 0        | Rothmund-Thomson syndrome DNA helicase recq4 OS=Culex quinquefasciatus GN=CpipJ_CPIJ007409 PE=4 SV=1 |
| CCG001204.1 | 2571 | 317   | 2669 | 5.29809641 | 36.29079763 | 2.776057764  | Up   | 2.22E-13 | 6.35E-13 | AGAP004341-PA OS=Anopheles gambiae GN=AgaP_AGAP004341 PE=4 SV=5                                      |
| CCG009683.1 | 1500 | 439   | 2669 | 12.575809  | 62.20242714 | 2.306319664  | Up   | 0        | 0        | AAEL001562-PA OS=Aedes aegypti GN=AAEL001562 PE=4 SV=1                                               |
| CCG011759.1 | 2973 | 715   | 2670 | 10.3341272 | 31.39542515 | 1.603137799  | Up   | 0        | 0        | AAEL003375-PA OS=Aedes aegypti GN=AAEL003375 PE=4 SV=1                                               |
| CCG003954.1 | 6537 | 6715  | 2670 | 44.139784  | 14.2785068  | -1.628234454 | Down | 0        | 0        | Gag polyprotein OS=Anopheles gambiae PE=4 SV=1                                                       |

|             |       |       |      |            |             |              |      |          |          |                                                                                          |
|-------------|-------|-------|------|------------|-------------|--------------|------|----------|----------|------------------------------------------------------------------------------------------|
| CCG028215.1 | 23899 | 6537  | 2671 | 11.7533435 | 3.907006873 | -1.588935517 | Down | 0        | 0        | AAEL012742-PA OS=Aedes aegypti GN=AAEL012742 PE=4 SV=1                                   |
| CCG017643.1 | 1278  | 68    | 2675 | 2.28633956 | 73.17166695 | 5.000173539  | Up   | 0        | 0        | AAEL000294-PA OS=Aedes aegypti GN=AAEL000294 PE=4 SV=1                                   |
| CCG009954.2 | 4675  | 467   | 2677 | 4.29237777 | 20.01781966 | 2.221435888  | Up   | 5.22E-14 | 1.75E-13 | AAEL008662-PA (Fragment) OS=Aedes aegypti GN=AAEL008662 PE=4 SV=1                        |
| CCG026216.1 | 2036  | 746   | 2678 | 15.7443134 | 45.98146621 | 1.546221629  | Up   | 0        | 0        | AAEL003943-PA OS=Aedes aegypti GN=AAEL003945 PE=4 SV=1                                   |
| CCG028106.1 | 3319  | 975   | 2680 | 12.622926  | 28.22783421 | 1.161072081  | Up   | 3.98E-12 | 9.20E-12 | AAEL002643-PA OS=Aedes aegypti GN=AAEL002645 PE=4 SV=1                                   |
| CCG022849.1 | 1548  | 516   | 2682 | 14.3232449 | 60.56724697 | 2.08017947   | Up   | 9.75E-14 | 3.07E-13 | AAEL005221-PA OS=Aedes aegypti GN=AAEL005221 PE=4 SV=1                                   |
| CCG001161.1 | 4374  | 355   | 2683 | 3.48748418 | 21.44331426 | 2.620269329  | Up   | 2.28E-13 | 6.52E-13 | AAEL003768-PA OS=Aedes aegypti GN=AAEL003768 PE=4 SV=1                                   |
| CCG025070.1 | 1773  | 11154 | 2690 | 270.323982 | 53.03878427 | -2.349569894 | Down | 0        | 0        | AAEL006586-PA (Fragment) OS=Aedes aegypti GN=AAEL006586 PE=3 SV=1                        |
| CCG011991.2 | 4995  | 530   | 2692 | 4.55935122 | 18.84037659 | 2.046927349  | Up   | 0        | 0        | AAEL012779-PA OS=Aedes aegypti GN=AAEL012779 PE=4 SV=1                                   |
| CCG026098.1 | 26029 | 12320 | 2692 | 20.3383584 | 3.615493529 | -2.491938737 | Down | 0        | 0        | AAEL008102-PA OS=Aedes aegypti GN=AAEL008102 PE=4 SV=1                                   |
| CCG017585.1 | 3171  | 209   | 2694 | 2.83212694 | 29.69965236 | 3.390488207  | Up   | 0        | 0        | AAEL001019-PA OS=Aedes aegypti GN=AAEL001019 PE=4 SV=1                                   |
| CCG000682.1 | 1626  | 731   | 2694 | 19.3178819 | 57.91980174 | 1.584119743  | Up   | 0        | 0        | AAEL002178-PA (Fragment) OS=Aedes aegypti GN=AAEL002178 PE=4 SV=1                        |
| CCG021441.1 | 1717  | 949   | 2697 | 23.7497252 | 54.91116625 | 1.209188733  | Up   | 1.30E-12 | 3.15E-12 | AAEL004148-PA OS=Aedes aegypti GN=AAEL004148 PE=4 SV=1                                   |
| CCG009109.3 | 3723  | 396   | 2701 | 4.57051166 | 25.36188707 | 2.472234508  | Up   | 4.78E-13 | 1.24E-12 | Putative uncharacterized protein OS=Culex quinquefasciatus GN=CpipJ_CPIJ008434 PE=4 SV=1 |
| CCG024743.2 | 3876  | 537   | 2701 | 5.95323723 | 24.36075995 | 2.03281285   | Up   | 3.67E-13 | 9.84E-13 | AAEL004950-PA OS=Aedes aegypti GN=AAEL004950 PE=4 SV=1                                   |

|             |       |       |      |            |             |              |      |          |          |                                                                                |
|-------------|-------|-------|------|------------|-------------|--------------|------|----------|----------|--------------------------------------------------------------------------------|
| CCG002917.1 | 2730  | 1094  | 2701 | 17.2193735 | 34.58692511 | 1.006194106  | Up   | 5.40E-12 | 1.22E-11 | Mitochondrial Rho GTPase<br>OS=Aedes aegypti<br>GN=AAEL001853 PE=3 SV=1        |
| CCG024591.1 | 1743  | 452   | 2702 | 11.1430408 | 54.19234873 | 2.281946201  | Up   | 1.12E-13 | 3.49E-13 | Uncharacterized protein<br>OS=Anopheles darlingi<br>GN=AND_07472 PE=4 SV=1     |
| CCG003237.2 | 13052 | 958   | 2702 | 3.15392321 | 7.236995391 | 1.198243317  | Up   | 1.10E-12 | 2.71E-12 | AAEL004181-PA (Fragment)<br>OS=Aedes aegypti<br>GN=AAEL004181 PE=4 SV=1        |
| CCG011828.1 | 1877  | 6137  | 2702 | 140.492947 | 50.32352895 | -1.481192705 | Down | 0        | 0        | AAEL010479-PA OS=Aedes<br>aegypti GN=AAEL010479 PE=3<br>SV=1                   |
| CCG021145.1 | 693   | 26828 | 2705 | 1663.48058 | 136.4533026 | -3.607725804 | Down | 0        | 0        | AAEL011741-PA OS=Aedes<br>aegypti GN=GSTS1 PE=3 SV=2                           |
| CCG006421.1 | 1212  | 0     | 2706 | 0.001      | 78.05041002 | 16.25211859  | Up   | 4.44E-16 | 1.65E-15 | AAEL004172-PA OS=Aedes<br>aegypti GN=AAEL004172 PE=3<br>SV=1                   |
| CCG025409.1 | 931   | 424   | 2706 | 19.5694602 | 101.6080526 | 2.376338873  | Up   | 0        | 0        | 60S acidic ribosomal protein P2<br>OS=Aedes aegypti<br>GN=AAEL014583 PE=4 SV=1 |
| CCG006087.2 | 1339  | 4     | 2707 | 0.12836366 | 70.67367828 | 9.104792376  | Up   | 2.95E-05 | 5.03E-05 | AAEL005916-PA OS=Aedes<br>aegypti GN=AAEL005916 PE=4<br>SV=1                   |
| CCG009479.1 | 982   | 7413  | 2707 | 324.373363 | 96.36665501 | -1.75104942  | Down | 0        | 0        | AAEL004987-PA OS=Aedes<br>aegypti GN=AAEL004987 PE=4<br>SV=1                   |
| CCG014137.1 | 5497  | 936   | 2708 | 7.31665847 | 17.22157786 | 1.234960508  | Up   | 1.10E-12 | 2.70E-12 | AAEL003105-PA (Fragment)<br>OS=Aedes aegypti<br>GN=AAEL003105 PE=4 SV=1        |
| CCG020879.1 | 358   | 15158 | 2708 | 1819.37217 | 264.4329986 | -2.782466564 | Down | 0        | 0        | AAEL000182-PA OS=Aedes<br>aegypti GN=AAEL000182 PE=4<br>SV=1                   |
| CCG014784.1 | 3665  | 61    | 2709 | 0.71518521 | 25.83955574 | 5.175120544  | Up   | 1.75E-14 | 6.17E-14 | AAEL013142-PA OS=Aedes<br>aegypti GN=AAEL013142 PE=4<br>SV=1                   |
| CCG021824.1 | 3001  | 304   | 2710 | 4.3528155  | 31.56845387 | 2.858462827  | Up   | 0        | 0        | AAEL005893-PA OS=Aedes<br>aegypti GN=AAEL005893 PE=4<br>SV=1                   |
| CCG006572.1 | 2019  | 92    | 2715 | 1.95800673 | 47.00927263 | 4.58548773   | Up   | 1.44E-14 | 5.12E-14 | AAEL005744-PA OS=Aedes<br>aegypti GN=AAEL005744 PE=4<br>SV=1                   |
| CCG025987.1 | 1776  | 284   | 2715 | 6.87128639 | 53.44128459 | 2.959302567  | Up   | 0        | 0        | AAEL008431-PA OS=Aedes<br>aegypti GN=AAEL008431 PE=4<br>SV=1                   |



|             |      |       |      |            |             |              |      |          |          |                                                                                                    |
|-------------|------|-------|------|------------|-------------|--------------|------|----------|----------|----------------------------------------------------------------------------------------------------|
| CCG026566.1 | 3573 | 830   | 2716 | 9.98177434 | 26.57337803 | 1.412613442  | Up   | 0        | 0        | AAEL010074-PA OS=Aedes aegypti GN=AAEL010074 PE=4 SV=1                                             |
| CCG025083.1 | 1479 | 11    | 2717 | 0.31958559 | 64.22017444 | 7.650680435  | Up   | 2.67E-07 | 5.04E-07 | AAEL001414-PA OS=Aedes aegypti GN=AAEL001414 PE=4 SV=1                                             |
| CCG026597.1 | 703  | 282   | 2717 | 17.2367925 | 135.1090156 | 2.970560702  | Up   | 5.45E-13 | 1.40E-12 | -                                                                                                  |
| CCG021430.1 | 6332 | 726   | 2718 | 4.92672573 | 15.00577957 | 1.606817207  | Up   | 2.70E-13 | 7.54E-13 | Target of rapamycin OS=Aedes aegypti GN=TOR PE=2 SV=1                                              |
| CCG013245.1 | 645  | 16290 | 2719 | 1085.23562 | 147.3667512 | -2.880525344 | Down | 0        | 0        | L(2) long form OS=Culex quinquefasciatus GN=CpipJ_CPIJ017149 PE=4 SV=1                             |
| CCG015599.1 | 2902 | 123   | 2722 | 1.8212534  | 32.7899481  | 4.17025005   | Up   | 0        | 0        | AAEL010086-PA OS=Aedes aegypti GN=AAEL010086 PE=3 SV=1                                             |
| CCG018192.1 | 1818 | 528   | 2722 | 12.4796589 | 52.34127028 | 2.068370436  | Up   | 0        | 0        | AGAP002194-PA OS=Anopheles gambiae GN=AgaP_AGAP002194 PE=4 SV=4                                    |
| CCG001461.1 | 3022 | 384   | 2725 | 5.4600854  | 31.52260232 | 2.529391218  | Up   | 1.03E-12 | 2.55E-12 | AAEL010007-PA OS=Aedes aegypti GN=AAEL010007 PE=4 SV=1                                             |
| CCG020336.1 | 3483 | 441   | 2727 | 5.44061239 | 27.37043375 | 2.330777343  | Up   | 0        | 0        | AAEL013686-PA OS=Aedes aegypti GN=AAEL013686 PE=4 SV=1                                             |
| CCG025439.1 | 2500 | 6073  | 2728 | 104.382079 | 38.14647161 | -1.452252521 | Down | 0        | 0        | Brantneo-chain-amino-acid aminotransferase OS=Culex quinquefasciatus GN=CpipJ_CPIJ015408 PE=3 SV=1 |
| CCG013806.1 | 1368 | 416   | 2732 | 13.0668199 | 69.81433636 | 2.417615254  | Up   | 1.20E-14 | 4.28E-14 | AAEL012312-PA OS=Aedes aegypti GN=AAEL012312 PE=4 SV=1                                             |
| CCG002162.2 | 4332 | 8484  | 2732 | 84.1540232 | 22.04663254 | -1.932473933 | Down | 0        | 0        | AAEL005430-PA OS=Aedes aegypti GN=AAEL005430 PE=4 SV=1                                             |
| CCG000169.1 | 2177 | 369   | 2733 | 7.28334041 | 43.88652752 | 2.591105942  | Up   | 0        | 0        | AAEL004920-PA OS=Aedes aegypti GN=AAEL004920 PE=4 SV=1                                             |
| CCG016743.1 | 2421 | 512   | 2741 | 9.0873623  | 39.57894946 | 2.122799817  | Up   | 3.04E-13 | 8.40E-13 | AAEL002771-PA (Fragment) OS=Aedes aegypti GN=AAEL002771 PE=4 SV=1                                  |
| CCG006489.1 | 968  | 10067 | 2742 | 446.876362 | 99.02437491 | -2.174020139 | Down | 0        | 0        | AAEL008789-PA OS=Aedes aegypti GN=AAEL008789 PE=4 SV=1                                             |

|             |       |     |      |            |             |             |    |          |          |                                                                                  |
|-------------|-------|-----|------|------------|-------------|-------------|----|----------|----------|----------------------------------------------------------------------------------|
| CCG028589.1 | 1104  | 698 | 2743 | 27.167459  | 86.85738513 | 1.676768884 | Up | 0        | 0        | Eukaryotic translation initiation factor OS=Forcipomyia taiwana PE=2 SV=1        |
| CCG000831.1 | 3918  | 952 | 2743 | 10.4408339 | 24.47436273 | 1.229034347 | Up | 4.77E-13 | 1.24E-12 | Tripeptidyl-peptidase 2 OS=Culex quinquefasciatus GN=CpipJ_CPIJ013852 PE=4 SV=1  |
| CCG013963.1 | 1882  | 93  | 2744 | 2.12337158 | 50.96998484 | 4.585219159 | Up | 4.04E-14 | 1.38E-13 | AAEL003950-PA OS=Aedes aegypti GN=AAEL003950 PE=4 SV=1                           |
| CCG014817.2 | 3474  | 365 | 2745 | 4.51466699 | 27.62247258 | 2.613150984 | Up | 2.91E-13 | 8.05E-13 | AAEL003162-PA OS=Aedes aegypti GN=AAEL003162 PE=4 SV=1                           |
| CCG013528.1 | 8169  | 565 | 2746 | 2.97195496 | 11.75118472 | 1.983322057 | Up | 4.06E-13 | 1.08E-12 | Neurobeachin OS=Culex quinquefasciatus GN=CpipJ_CPIJ007145 PE=4 SV=1             |
| CCG025566.1 | 2334  | 838 | 2746 | 15.4278653 | 41.12914654 | 1.41462268  | Up | 0        | 0        | AAEL011432-PA OS=Aedes aegypti GN=AAEL011432 PE=4 SV=1                           |
| CCG013219.1 | 2108  | 875 | 2747 | 17.836109  | 45.55521171 | 1.352815192 | Up | 1.12E-12 | 2.74E-12 | Methionine aminopeptidase OS=Aedes aegypti GN=AAEL003769 PE=3 SV=1               |
| CCG021999.1 | 26232 | 804 | 2748 | 1.31700467 | 3.662143358 | 1.475427801 | Up | 2.72E-13 | 7.59E-13 | Zinc finger protein 363 OS=Culex quinquefasciatus GN=CpipJ_CPIJ000911 PE=4 SV=1  |
| CCG026824.1 | 1611  | 4   | 2755 | 0.10669084 | 59.78277623 | 9.130149807 | Up | 2.95E-05 | 5.03E-05 | AAEL000739-PA OS=Aedes aegypti GN=AAEL000739 PE=4 SV=1                           |
| CCG007750.2 | 4556  | 860 | 2755 | 8.11105614 | 21.13916868 | 1.381956958 | Up | 1.25E-12 | 3.05E-12 | AAEL006054-PA OS=Aedes aegypti GN=AAEL006054 PE=4 SV=1                           |
| CCG014647.1 | 3537  | 591 | 2756 | 7.17984539 | 27.2391888  | 1.923659056 | Up | 0        | 0        | AAEL004431-PA OS=Aedes aegypti GN=AAEL004431 PE=4 SV=1                           |
| CCG025390.1 | 2198  | 381 | 2758 | 7.44834799 | 43.8648441  | 2.558072758 | Up | 0        | 0        | AAEL001520-PA OS=Aedes aegypti GN=AAEL001520 PE=4 SV=1                           |
| CCG017989.1 | 5540  | 780 | 2759 | 6.04989043 | 17.40972665 | 1.524912631 | Up | 1.45E-12 | 3.51E-12 | AAEL001416-PA OS=Aedes aegypti GN=AAEL001416 PE=4 SV=1                           |
| CCG003940.1 | 4047  | 355 | 2760 | 3.76927497 | 23.8410783  | 2.661090541 | Up | 2.28E-13 | 6.52E-13 | DNA repair protein RAD50 OS=Culex quinquefasciatus GN=CpipJ_CPIJ004115 PE=4 SV=1 |

|             |       |      |      |            |             |              |      |          |          |                                                                              |
|-------------|-------|------|------|------------|-------------|--------------|------|----------|----------|------------------------------------------------------------------------------|
| CCG015130.1 | 7440  | 898  | 2760 | 5.18640076 | 12.968393   | 1.322194121  | Up   | 2.22E-12 | 5.28E-12 | AAEL011417-PA (Fragment)<br>OS=Aedes aegypti<br>GN=AAEL011417 PE=4 SV=1      |
| CCG003530.1 | 1326  | 1018 | 2760 | 32.9888309 | 72.76383401 | 1.141243909  | Up   | 4.26E-12 | 9.81E-12 | AAEL009345-PA OS=Aedes<br>aegypti GN=AAEL009345 PE=2<br>SV=1                 |
| CCG010112.1 | 1422  | 9361 | 2763 | 282.868977 | 67.9252593  | -2.05811389  | Down | 0        | 0        | AAEL005610-PA OS=Aedes<br>aegypti GN=AAEL005610 PE=4<br>SV=1                 |
| CCG008786.1 | 2734  | 267  | 2764 | 4.19638593 | 35.34187162 | 3.074159173  | Up   | 5.21E-13 | 1.35E-12 | AAEL008519-PA OS=Aedes<br>aegypti GN=AAEL008519 PE=4<br>SV=1                 |
| CCG028601.1 | 1071  | 196  | 2766 | 7.86374228 | 90.28440108 | 3.521188801  | Up   | 7.93E-14 | 2.55E-13 | AAEL001958-PA OS=Aedes<br>aegypti GN=AAEL001958 PE=4<br>SV=1                 |
| CCG017093.1 | 1958  | 66   | 2767 | 1.44841802 | 49.40222259 | 5.092026013  | Up   | 0        | 0        | AAEL003355-PA OS=Aedes<br>aegypti GN=AAEL003355 PE=4<br>SV=1                 |
| CCG018799.1 | 4383  | 582  | 2767 | 5.705769   | 22.06925663 | 1.95154479   | Up   | 1.68E-13 | 4.94E-13 | AAEL004039-PA OS=Aedes<br>aegypti GN=AAEL004039 PE=4<br>SV=1                 |
| CCG004668.1 | 1059  | 20   | 2769 | 0.81151529 | 91.40648572 | 6.815534447  | Up   | 3.69E-10 | 7.72E-10 | AAEL013659-PA (Fragment)<br>OS=Aedes aegypti<br>GN=AAEL013659 PE=4 SV=1      |
| CCG020863.1 | 1296  | 306  | 2769 | 10.1456318 | 74.69094783 | 2.880074699  | Up   | 0        | 0        | Histone deacetylase OS=Aedes<br>aegypti GN=AAEL004586 PE=3<br>SV=1           |
| CCG004765.2 | 519   | 44   | 2770 | 3.64290621 | 186.5788568 | 5.678551846  | Up   | 3.91E-14 | 1.35E-13 | AAEL009985-PA OS=Aedes<br>aegypti GN=AAEL009985 PE=4<br>SV=1                 |
| CCG022083.1 | 2613  | 754  | 2770 | 12.3992269 | 37.05871667 | 1.579562751  | Up   | 0        | 0        | AGAP005609-PB OS=Anopheles<br>gambiae GN=AGAP005609 PE=4<br>SV=4             |
| CCG014857.1 | 1602  | 7793 | 2770 | 209.028178 | 60.44595921 | -1.789979636 | Down | 0        | 0        | -                                                                            |
| CCG013224.2 | 876   | 1037 | 2773 | 50.8671402 | 110.6613031 | 1.121344926  | Up   | 5.05E-12 | 1.15E-11 | Cyclic-AMP response element<br>binding protein OS=Aedes aegypti<br>PE=2 SV=1 |
| CCG008931.1 | 26148 | 1124 | 2774 | 1.84710042 | 3.70866834  | 1.005638956  | Up   | 3.38E-12 | 7.88E-12 | UDP-glucose 6-dehydrogenase<br>OS=Aedes aegypti<br>GN=AAEL011242 PE=3 SV=1   |
| CCG023492.1 | 3061  | 683  | 2776 | 9.58782383 | 31.70342252 | 1.725363288  | Up   | 1.46E-12 | 3.53E-12 | AAEL004068-PA OS=Aedes<br>aegypti GN=AAEL004068 PE=4<br>SV=1                 |

|             |      |       |      |            |             |              |      |           |           |                                                                   |
|-------------|------|-------|------|------------|-------------|--------------|------|-----------|-----------|-------------------------------------------------------------------|
| CCG007455.1 | 743  | 9     | 2779 | 0.52049477 | 130.7524242 | 7.972738322  | Up   | 1.09E-06  | 2.01E-06  | -                                                                 |
| CCG024097.1 | 2097 | 35    | 2779 | 0.7171868  | 46.32763526 | 6.013380306  | Up   | 6.39E-14  | 2.10E-13  | AAEL013822-PA OS=Aedes aegypti GN=AAEL013822 PE=4 SV=1            |
| CCG023506.1 | 1119 | 10410 | 2782 | 399.745252 | 86.911462   | -2.20146254  | Down | 0         | 0         | AAEL002764-PA OS=Aedes aegypti GN=AAEL002764 PE=3 SV=1            |
| CCG007160.1 | 2715 | 389   | 2783 | 6.15662128 | 35.83384319 | 2.541112052  | Up   | 0         | 0         | AAEL007558-PA (Fragment) OS=Aedes aegypti GN=AAEL007558 PE=4 SV=1 |
| CCG018474.1 | 2091 | 436   | 2783 | 8.95973424 | 46.52744345 | 2.376554072  | Up   | 1.61E-13  | 4.76E-13  | AAEL007158-PA OS=Aedes aegypti GN=AAEL007158 PE=4 SV=1            |
| CCG010643.1 | 3627 | 443   | 2783 | 5.2483023  | 26.82351372 | 2.353575509  | Up   | 0         | 0         | AAEL008382-PA OS=Aedes aegypti GN=AAEL008382 PE=4 SV=1            |
| CCG016454.1 | 2673 | 1104  | 2783 | 17.7473202 | 36.39688899 | 1.03621394   | Up   | 4.57E-12  | 1.05E-11  | AGAP005609-PB OS=Anopheles gambiae GN=AGAP005609 PE=4 SV=4        |
| CCG025990.1 | 1478 | 658   | 2787 | 19.129963  | 65.91929456 | 1.784866717  | Up   | 1.34E-12  | 3.25E-12  | AAEL010809-PA OS=Aedes aegypti GN=AAEL010809 PE=3 SV=1            |
| CCG016818.1 | 3937 | 383   | 2789 | 4.18019008 | 24.76470254 | 2.566644841  | Up   | 0         | 0         | AAEL014695-PA OS=Aedes aegypti GN=AAEL014695 PE=4 SV=1            |
| CCG005718.1 | 3892 | 4760  | 2790 | 52.5529128 | 25.06001855 | -1.068383248 | Down | 6.34E-221 | 3.84E-220 | -                                                                 |
| CCG000378.1 | 1278 | 852   | 2793 | 28.6464897 | 76.39942647 | 1.415203442  | Up   | 1.12E-12  | 2.74E-12  | AAEL002160-PA OS=Aedes aegypti GN=AAEL002160 PE=4 SV=1            |
| CCG003683.2 | 1555 | 666   | 2794 | 18.4037577 | 62.81249216 | 1.771051142  | Up   | 0         | 0         | AAEL009766-PA OS=Aedes aegypti GN=AAEL009766 PE=3 SV=1            |
| CCG004256.1 | 1798 | 942   | 2796 | 22.5125083 | 54.3622591  | 1.2718786    | Up   | 8.72E-13  | 2.18E-12  | AAEL007556-PA OS=Aedes aegypti GN=AAEL007556 PE=4 SV=1            |
| CCG025579.1 | 1838 | 540   | 2797 | 12.6244052 | 53.19820464 | 2.075162145  | Up   | 9.26E-13  | 2.31E-12  | AAEL011254-PA OS=Aedes aegypti GN=AAEL011254 PE=4 SV=1            |
| CCG023435.1 | 3021 | 129   | 2799 | 1.83485461 | 32.3893468  | 4.14178172   | Up   | 0         | 0         | AAEL009411-PA OS=Aedes aegypti GN=AAEL009411 PE=4 SV=1            |
| CCG019427.1 | 1953 | 158   | 2799 | 3.47630213 | 50.10149344 | 3.849228227  | Up   | 0         | 0         | AAEL003388-PA OS=Aedes aegypti GN=AAEL003388 PE=4 SV=1            |
| CCG009524.1 | 3181 | 172   | 2800 | 2.32341853 | 30.77119615 | 3.727259561  | Up   | 1.35E-13  | 4.09E-13  | DNA polymerase OS=Aedes aegypti GN=AAEL009851 PE=3 SV=1           |

|             |       |       |      |            |             |              |      |          |          |                                                                                          |
|-------------|-------|-------|------|------------|-------------|--------------|------|----------|----------|------------------------------------------------------------------------------------------|
| CCG026756.1 | 5127  | 398   | 2801 | 3.33566498 | 19.09852413 | 2.517414851  | Up   | 7.64E-13 | 1.92E-12 | AAEL004393-PA OS=Aedes aegypti GN=AAEL004393 PE=4 SV=1                                   |
| CCG001810.1 | 3684  | 962   | 2804 | 11.2206527 | 26.60776549 | 1.245690754  | Up   | 1.62E-12 | 3.89E-12 | Structural maintenance of chromosomes protein OS=Aedes aegypti GN=AAEL005802 PE=3 SV=1   |
| CCG026047.1 | 7072  | 364   | 2815 | 2.21167752 | 13.91509461 | 2.653437771  | Up   | 0        | 0        | Adenylyate cyclase type OS=Culex quinquefasciatus GN=CpipJ_CPIJ017287 PE=3 SV=1          |
| CCG014305.1 | 3957  | 137   | 2816 | 1.48770625 | 24.87806606 | 4.063712739  | Up   | 2.90E-13 | 8.04E-13 | AAEL010566-PA OS=Aedes aegypti GN=AAEL010568 PE=3 SV=1                                   |
| CCG014806.1 | 1596  | 603   | 2821 | 16.2348057 | 61.79028745 | 1.928289963  | Up   | 3.84E-13 | 1.03E-12 | AAEL013318-PA OS=Aedes aegypti GN=AAEL013318 PE=4 SV=1                                   |
| CCG004957.1 | 2922  | 16492 | 2823 | 242.524594 | 33.77385877 | -2.844152129 | Down | 0        | 0        | AAEL000753-PA OS=Aedes aegypti GN=AAEL000753 PE=4 SV=1                                   |
| CCG017985.2 | 4809  | 679   | 2827 | 6.06705132 | 20.55043636 | 1.760101607  | Up   | 0        | 0        | SYP1-dependent RNA helicase A OS=Culex quinquefasciatus GN=CpipJ_CPIJ003405 PE=4 SV=1    |
| CCG012556.1 | 2412  | 135   | 2828 | 2.40502246 | 40.98756497 | 4.091064012  | Up   | 1.90E-13 | 5.48E-13 | AAEL011682-PA OS=Aedes aegypti GN=AAEL011682 PE=4 SV=1                                   |
| CCG011175.1 | 1666  | 762   | 2832 | 19.6536241 | 59.42487384 | 1.596271566  | Up   | 5.84E-13 | 1.50E-12 | AAEL008366-PA OS=Aedes aegypti GN=AAEL008366 PE=4 SV=1                                   |
| CCG026358.1 | 1461  | 6     | 2834 | 0.17646708 | 67.81092154 | 8.585974746  | Up   | 8.38E-06 | 1.47E-05 | AAEL015402-PA OS=Aedes aegypti GN=AAEL015402 PE=4 SV=1                                   |
| CCG023968.1 | 5007  | 717   | 2840 | 6.1532454  | 19.82854125 | 1.68815911   | Up   | 1.89E-14 | 6.63E-14 | Putative uncharacterized protein OS=Culex quinquefasciatus GN=CpipJ_CPIJ001573 PE=4 SV=1 |
| CCG017289.1 | 18896 | 693   | 2842 | 1.57589046 | 5.257801788 | 1.738292501  | Up   | 1.99E-12 | 4.75E-12 | AAEL012779-PA OS=Aedes aegypti GN=AAEL012779 PE=4 SV=1                                   |
| CCG021231.1 | 6339  | 453   | 2843 | 3.07071932 | 15.67855827 | 2.352144347  | Up   | 9.90E-13 | 2.45E-12 | AAEL007242-PA (Fragment) OS=Aedes aegypti GN=AAEL007242 PE=4 SV=1                        |
| CCG005460.1 | 10959 | 7879  | 2847 | 30.8931964 | 9.08168756  | -1.766256838 | Down | 0        | 0        | Unm OS=Culex quinquefasciatus GN=CpipJ_CPIJ006896 PE=4 SV=1                              |

|             |       |      |      |            |             |              |      |          |          |                                                                                          |
|-------------|-------|------|------|------------|-------------|--------------|------|----------|----------|------------------------------------------------------------------------------------------|
| CCG016447.1 | 2067  | 111  | 2848 | 2.3075184  | 48.1669919  | 4.383630768  | Up   | 0        | 0        | AAEL007271-PA OS=Aedes aegypti GN=AAEL007271 PE=4 SV=1                                   |
| CCG006957.1 | 2034  | 128  | 2849 | 2.70409343 | 48.96564923 | 4.17855311   | Up   | 4.15E-14 | 1.42E-13 | AAEL005424-PA OS=Aedes aegypti GN=AAEL005424 PE=4 SV=1                                   |
| CCG016148.1 | 1619  | 867  | 2849 | 23.0109697 | 61.51706641 | 1.418664927  | Up   | 0        | 0        | AAEL009601-PA OS=Aedes aegypti GN=AAEL009601 PE=4 SV=1                                   |
| CCG022243.1 | 2698  | 918  | 2850 | 14.6205398 | 36.92775715 | 1.336709064  | Up   | 1.42E-12 | 3.43E-12 | AAEL012394-PA OS=Aedes aegypti GN=AAEL012394 PE=4 SV=1                                   |
| CCG011837.1 | 43266 | 1029 | 2850 | 1.02195389 | 2.302757103 | 1.172032141  | Up   | 3.54E-12 | 8.24E-12 | AGAP001731-PA (Fragment) OS=Anopheles gambiae GN=AgaP_AGAP001731 PE=4 SV=5               |
| CCG024324.1 | 1866  | 71   | 2851 | 1.63496847 | 53.41160079 | 5.029818408  | Up   | 0        | 0        | -                                                                                        |
| CCG019698.1 | 951   | 841  | 2851 | 37.9995235 | 104.8013113 | 1.463603538  | Up   | 1.23E-12 | 3.01E-12 | AAEL006820-PA OS=Aedes aegypti GN=AAEL006820 PE=4 SV=1                                   |
| CCG022438.1 | 3942  | 266  | 2856 | 2.89953054 | 25.32745775 | 3.126811032  | Up   | 4.09E-14 | 1.40E-13 | AAEL007436-PA (Fragment) OS=Aedes aegypti GN=AAEL007436 PE=4 SV=1                        |
| CCG020990.1 | 3948  | 701  | 2857 | 7.6296312  | 25.29782086 | 1.729327891  | Up   | 1.08E-12 | 2.64E-12 | Putative uncharacterized protein OS=Culex quinquefasciatus GN=CpipJ_CPIJ002576 PE=4 SV=1 |
| CCG017626.1 | 2577  | 383  | 2861 | 6.38626634 | 38.81087693 | 2.603416404  | Up   | 0        | 0        | AAEL002446-PA (Fragment) OS=Aedes aegypti GN=AAEL002446 PE=4 SV=1                        |
| CCG012209.1 | 462   | 626  | 2862 | 58.2230603 | 216.5597146 | 1.895102314  | Up   | 0        | 0        | Superoxide dismutase [Cu-Zn] OS=Aedes aegypti GN=CUSOD3_b PE=2 SV=1                      |
| CCG010116.1 | 4563  | 338  | 2865 | 3.1829433  | 21.94947687 | 2.785753191  | Up   | 1.44E-13 | 4.32E-13 | AAEL005597-PA OS=Aedes aegypti GN=AAEL005597 PE=4 SV=1                                   |
| CCG021521.1 | 1521  | 1038 | 2866 | 29.3245132 | 65.87141435 | 1.16754537   | Up   | 2.33E-12 | 5.51E-12 | AAEL005368-PA OS=Aedes aegypti GN=AAEL005368 PE=4 SV=1                                   |
| CCG003220.2 | 1361  | 8796 | 2867 | 277.70888  | 73.64098421 | -1.914992496 | Down | 0        | 0        | AAEL009387-PA OS=Aedes aegypti GN=AAEL009387 PE=3 SV=1                                   |
| CCG024704.1 | 5582  | 748  | 2869 | 5.75803681 | 17.96762738 | 1.641750997  | Up   | 4.45E-13 | 1.17E-12 | AAEL008615-PA OS=Aedes aegypti GN=AAEL008615 PE=4 SV=1                                   |

|             |       |      |      |            |             |              |      |          |          |                                                                                  |
|-------------|-------|------|------|------------|-------------|--------------|------|----------|----------|----------------------------------------------------------------------------------|
| CCG016933.1 | 5968  | 923  | 2869 | 6.64562082 | 16.80551207 | 1.338458619  | Up   | 0        | 0        | AAEL012702-PA OS=Aedes aegypti GN=AAEL012702 PE=3 SV=1                           |
| CCG025244.1 | 2455  | 733  | 2872 | 12.8296601 | 40.89619996 | 1.67248385   | Up   | 0        | 0        | AAEL009755-PA OS=Aedes aegypti GN=AAEL009755 PE=4 SV=1                           |
| CCG004093.1 | 13503 | 911  | 2874 | 2.89901712 | 7.440575238 | 1.359850306  | Up   | 0        | 0        | AAEL011552-PA OS=Aedes aegypti GN=AAEL011552 PE=4 SV=1                           |
| CCG012284.1 | 3087  | 778  | 2875 | 10.829431  | 32.557514   | 1.5880331    | Up   | 0        | 0        | AAEL005261-PA OS=Aedes aegypti GN=AAEL005261 PE=4 SV=1                           |
| CCG003296.1 | 3364  | 700  | 2878 | 8.94138354 | 29.90782418 | 1.741952969  | Up   | 0        | 0        | AAEL006415-PA OS=Aedes aegypti GN=AAEL006415 PE=3 SV=1                           |
| CCG026678.1 | 2502  | 163  | 2879 | 2.79938719 | 40.22577091 | 3.844937123  | Up   | 1.80E-13 | 5.24E-13 | AAEL003950-PA OS=Aedes aegypti GN=AAEL003950 PE=4 SV=1                           |
| CCG000469.1 | 5895  | 946  | 2879 | 6.89556725 | 17.07292262 | 1.307968904  | Up   | 0        | 0        | AAEL014868-PA OS=Aedes aegypti GN=AAEL014868 PE=4 SV=1                           |
| CCG002462.1 | 2478  | 454  | 2886 | 7.87258253 | 40.71411895 | 2.370620301  | Up   | 3.16E-13 | 8.66E-13 | AAEL013968-PA OS=Aedes aegypti GN=AAEL013968 PE=4 SV=1                           |
| CCG016591.1 | 3680  | 506  | 2886 | 5.90833851 | 27.41564858 | 2.214175214  | Up   | 3.38E-13 | 9.20E-13 | Zinc finger protein ZTF1 OS=Culex quinquefasciatus GN=CpipJ_CPIJ000636 PE=4 SV=1 |
| CCG014302.1 | 2922  | 1169 | 2888 | 17.190835  | 34.55150695 | 1.007109016  | Up   | 2.14E-12 | 5.08E-12 | AAEL006519-PA OS=Aedes aegypti GN=AAEL006519 PE=4 SV=1                           |
| CCG022878.1 | 3177  | 257  | 2889 | 3.47599049 | 31.78925452 | 3.193043143  | Up   | 4.14E-13 | 1.09E-12 | AAEL009912-PA OS=Aedes aegypti GN=AAEL009912 PE=4 SV=1                           |
| CCG019291.1 | 594   | 6313 | 2891 | 456.680025 | 170.1420508 | -1.424443938 | Down | 0        | 0        | AAEL007490-PA OS=Aedes aegypti GN=AAEL007490 PE=4 SV=1                           |
| CCG019772.1 | 4026  | 666  | 2892 | 7.10825714 | 25.11160865 | 1.820786674  | Up   | 0        | 0        | AAEL005495-PA (Fragment) OS=Aedes aegypti GN=AAEL005495 PE=4 SV=1                |
| CCG005441.1 | 2962  | 816  | 2892 | 11.8377122 | 34.13211898 | 1.527739699  | Up   | 2.12E-12 | 5.04E-12 | Ubiquitin carboxyl-terminal hydrolase OS=Aedes aegypti GN=AAEL004980 PE=3 SV=1   |
| CCG007200.2 | 5040  | 574  | 2894 | 4.89377533 | 20.07326448 | 2.036255484  | Up   | 3.10E-13 | 8.52E-13 | AAEL001470-PA OS=Aedes aegypti GN=AAEL001470 PE=4 SV=1                           |
| CCG013141.3 | 2034  | 239  | 2897 | 5.04904945 | 49.79062331 | 3.301790365  | Up   | 6.72E-13 | 1.70E-12 | AAEL004623-PA OS=Aedes aegypti GN=AAEL004623 PE=4 SV=1                           |

|             |       |      |      |            |             |              |      |           |           |                                                                                          |
|-------------|-------|------|------|------------|-------------|--------------|------|-----------|-----------|------------------------------------------------------------------------------------------|
| CCG014852.1 | 2815  | 1007 | 2899 | 15.3714113 | 36.00143672 | 1.227804854  | Up   | 3.64E-12  | 8.45E-12  | AAEL006531-PA OS=Aedes aegypti GN=AAEL006531 PE=4 SV=1                                   |
| CCG012278.1 | 1486  | 195  | 2901 | 5.6386933  | 68.24627249 | 3.59731747   | Up   | 2.26E-13  | 6.47E-13  | AAEL011199-PA OS=Aedes aegypti GN=AAEL011199 PE=4 SV=1                                   |
| CCG019692.1 | 19554 | 811  | 2902 | 1.78216502 | 5.188141515 | 1.541586904  | Up   | 0         | 0         | Uncharacterized protein OS=Monodelphis domestica PE=4 SV=2                               |
| CCG021761.1 | 791   | 422  | 2906 | 22.9244349 | 128.4307867 | 2.486033003  | Up   | 5.52E-13  | 1.42E-12  | -                                                                                        |
| CCG012312.1 | 1614  | 431  | 2908 | 11.4745698 | 62.98554452 | 2.456580699  | Up   | 0         | 0         | AAEL007827-PA OS=Aedes aegypti GN=AAEL007827 PE=4 SV=1                                   |
| CCG000668.1 | 980   | 668  | 2909 | 29.2895742 | 103.7690073 | 1.824916492  | Up   | 9.28E-13  | 2.31E-12  | Uncharacterized protein OS=Anopheles darlingi GN=AND_08855 PE=4 SV=1                     |
| CCG001357.1 | 3963  | 5415 | 2909 | 58.713377  | 25.66076889 | -1.194124838 | Down | 2.92E-300 | 1.84E-299 | Inhibitor of apoptosis protein 1 OS=Aedes albopictus GN=IAP1 PE=2 SV=1                   |
| CCG020320.1 | 1725  | 831  | 2911 | 20.7002026 | 58.99335866 | 1.510907661  | Up   | 5.11E-15  | 1.84E-14  | Zinc finger protein 442 OS=Culex quinquefasciatus GN=CpipJ_CPIJ011952 PE=4 SV=1          |
| CCG006866.1 | 1119  | 273  | 2912 | 10.4832328 | 90.97274527 | 3.117350703  | Up   | 1.53E-14  | 5.42E-14  | AAEL009400-PA OS=Aedes aegypti GN=AAEL009400 PE=4 SV=1                                   |
| CCG024680.1 | 1602  | 464  | 2912 | 12.445666  | 63.54463293 | 2.352126849  | Up   | 0         | 0         | AAEL006048-PA OS=Aedes aegypti GN=AAEL006048 PE=4 SV=1                                   |
| CCG003322.1 | 2808  | 600  | 2914 | 9.18156722 | 36.27792682 | 1.982279675  | Up   | 0         | 0         | AGAP001361-PA OS=Anopheles gambiae GN=AgaP_AGAP001361 PE=4 SV=3                          |
| CCG010561.1 | 2313  | 589  | 2915 | 10.9421417 | 44.0567993  | 2.009469548  | Up   | 0         | 0         | AAEL012882-PA OS=Aedes aegypti GN=AAEL012882 PE=4 SV=1                                   |
| CCG008069.1 | 2922  | 548  | 2916 | 8.05866344 | 34.88649386 | 2.114056125  | Up   | 9.78E-13  | 2.42E-12  | AAEL009605-PA OS=Aedes aegypti GN=AAEL009605 PE=4 SV=1                                   |
| CCG017297.1 | 516   | 708  | 2918 | 58.9584731 | 197.6904101 | 1.745471822  | Up   | 9.24E-13  | 2.30E-12  | AAEL005369-PA OS=Aedes aegypti GN=AAEL005369 PE=4 SV=1                                   |
| CCG028468.1 | 2862  | 5457 | 2918 | 81.9307623 | 35.64229616 | -1.200814957 | Down | 2.00E-305 | 1.26E-304 | Putative uncharacterized protein OS=Culex quinquefasciatus GN=CpipJ_CPIJ004708 PE=4 SV=1 |



|             |      |     |      |            |             |             |    |          |          |                                                                                                           |
|-------------|------|-----|------|------------|-------------|-------------|----|----------|----------|-----------------------------------------------------------------------------------------------------------|
| CCG016744.1 | 1433 | 477 | 2924 | 14.3032543 | 71.33147333 | 2.318195344 | Up | 0        | 0        | AAEL002771-PA (Fragment)<br>OS=Aedes aegypti<br>GN=AAEL002771 PE=4 SV=1                                   |
| CCG021267.1 | 579  | 627 | 2931 | 46.5319924 | 176.9649555 | 1.927168824 | Up | 3.40E-13 | 9.23E-13 | AAEL002705-PA OS=Aedes<br>aegypti GN=AAEL002705 PE=4<br>SV=1                                              |
| CCG010351.1 | 1717 | 695 | 2931 | 17.3931075 | 59.67542762 | 1.778621289 | Up | 1.60E-12 | 3.84E-12 | AAEL003970-PA (Fragment)<br>OS=Aedes aegypti<br>GN=AAEL003970 PE=4 SV=1                                   |
| CCG013793.1 | 1587 | 224 | 2933 | 6.06504131 | 64.60782972 | 3.413119638 | Up | 2.04E-13 | 5.88E-13 | AAEL013390-PA OS=Aedes<br>aegypti GN=AAEL013390 PE=4<br>SV=1                                              |
| CCG016493.2 | 3238 | 913 | 2934 | 12.1159258 | 31.67621496 | 1.38649531  | Up | 0        | 0        | AAEL006185-PA OS=Aedes<br>aegypti GN=AAEL006185 PE=4<br>SV=1                                              |
| CCG028181.1 | 4957 | 982 | 2934 | 8.51246306 | 20.6914634  | 1.281387145 | Up | 2.51E-12 | 5.91E-12 | AAEL006073-PA OS=Aedes<br>aegypti GN=AAEL006073 PE=4<br>SV=1                                              |
| CCG006303.1 | 3207 | 642 | 2936 | 8.60198616 | 32.00420973 | 1.89551997  | Up | 0        | 0        | Testis-specific zinc finger protein<br>topi OS=Culex quinquefasciatus<br>GN=CpipJ_CPIJ001933 PE=4<br>SV=1 |
| CCG005122.1 | 1715 | 429 | 2937 | 10.7486975 | 59.86732296 | 2.477606917 | Up | 0        | 0        | AAEL003998-PA OS=Aedes<br>aegypti GN=AAEL003998 PE=4<br>SV=1                                              |
| CCG018015.1 | 5073 | 517 | 2939 | 4.37913519 | 20.25278443 | 2.209402377 | Up | 8.39E-14 | 2.69E-13 | AAEL001384-PA (Fragment)<br>OS=Aedes aegypti<br>GN=AAEL001384 PE=4 SV=1                                   |
| CCG025177.1 | 2500 | 942 | 2939 | 16.190996  | 41.09695017 | 1.343839598 | Up | 8.72E-13 | 2.18E-12 | Glycylpeptide N-<br>tetradecanoyltransferase<br>OS=Aedes aegypti<br>GN=AAEL005092 PE=3 SV=1               |
| CCG019549.1 | 582  | 941 | 2940 | 69.4751207 | 176.5933569 | 1.345862731 | Up | 0        | 0        | AAEL005038-PA OS=Aedes<br>aegypti GN=AAEL005038 PE=3<br>SV=1                                              |
| CCG014513.1 | 3081 | 989 | 2943 | 13.7932709 | 33.39247275 | 1.27555832  | Up | 5.21E-12 | 1.18E-11 | GH16388 OS=Drosophila<br>grimshawi GN=GH16388 PE=4<br>SV=1                                                |
| CCG003475.2 | 2705 | 187 | 2944 | 2.97055097 | 38.04701176 | 3.6789807   | Up | 3.31E-13 | 9.04E-13 | AAEL012224-PA OS=Aedes<br>aegypti GN=AAEL012224 PE=4<br>SV=1                                              |

|             |       |       |      |            |             |              |      |          |          |                                                                                                   |
|-------------|-------|-------|------|------------|-------------|--------------|------|----------|----------|---------------------------------------------------------------------------------------------------|
| CCG004210.1 | 41633 | 7222  | 2944 | 7.4538809  | 2.472009387 | -1.592307545 | Down | 0        | 0        | AAEL008340-PA (Fragment)<br>OS=Aedes aegypti<br>GN=AAEL008340 PE=4 SV=1                           |
| CCG023651.1 | 1798  | 228   | 2946 | 5.44888737 | 57.27868931 | 3.393964905  | Up   | 1.05E-13 | 3.28E-13 | GK25828 OS=Drosophila willistoni<br>GN=GK25828 PE=4 SV=1                                          |
| CCG010879.1 | 3714  | 349   | 2952 | 4.03781297 | 27.78590012 | 2.782706984  | Up   | 4.55E-14 | 1.54E-13 | AAEL011287-PA OS=Aedes<br>aegypti GN=AAEL011287 PE=4<br>SV=1                                      |
| CCG024822.1 | 54217 | 9904  | 2954 | 7.84942456 | 1.90469317  | -2.043028285 | Down | 0        | 0        | GE15410 OS=Drosophila yakuba<br>GN=GE15410 PE=4 SV=1                                              |
| CCG026796.1 | 4251  | 10748 | 2954 | 108.642368 | 24.29234288 | -2.161013291 | Down | 0        | 0        | AAEL003837-PA OS=Aedes<br>aegypti GN=AAEL003837 PE=4<br>SV=1                                      |
| CCG000833.1 | 763   | 7897  | 2958 | 444.733937 | 135.5263207 | -1.714369434 | Down | 0        | 0        | AAEL009078-PA OS=Aedes<br>aegypti GN=AAEL009078 PE=4<br>SV=1                                      |
| CCG007976.1 | 2612  | 526   | 2961 | 8.65317014 | 39.62919507 | 2.19526299   | Up   | 1.08E-13 | 3.37E-13 | AAEL010457-PA OS=Aedes<br>aegypti GN=AAEL010457 PE=4<br>SV=1                                      |
| CCG006513.1 | 3438  | 61    | 2966 | 0.76240658 | 30.15888566 | 5.305878749  | Up   | 1.75E-14 | 6.17E-14 | AAEL009238-PA OS=Aedes<br>aegypti GN=AAEL009238 PE=4<br>SV=1                                      |
| CCG010024.1 | 1840  | 76    | 2967 | 1.77483686 | 56.3702213  | 4.989174902  | Up   | 0        | 0        | AAEL003382-PA OS=Aedes<br>aegypti GN=AAEL003382 PE=4<br>SV=1                                      |
| CCG021458.1 | 39389 | 888   | 2967 | 0.96872539 | 2.633253121 | 1.442686549  | Up   | 0        | 0        | AAEL004918-PA OS=Aedes<br>aegypti GN=AAEL004918 PE=4<br>SV=1                                      |
| CCG008993.1 | 423   | 320   | 2974 | 32.506655  | 245.7823053 | 2.918574041  | Up   | 0        | 0        | Putative uncharacterized protein<br>OS=Culex quinquefasciatus<br>GN=CpipJ_CPIJ005950 PE=4<br>SV=1 |
| CCG018200.1 | 1952  | 308   | 2976 | 6.78006058 | 53.29704492 | 2.974685474  | Up   | 0        | 0        | AAEL008630-PA OS=Aedes<br>aegypti GN=AAEL008630 PE=4<br>SV=1                                      |
| CCG021501.1 | 615   | 9     | 2977 | 0.62882538 | 169.2207967 | 8.072031709  | Up   | 1.09E-06 | 2.01E-06 | Putative salivary secreted 30 kDa<br>allergen-like protein 30k-5<br>OS=Aedes albopictus PE=2 SV=1 |
| CCG020676.1 | 2214  | 45    | 2979 | 0.87336859 | 47.03735614 | 5.751072516  | Up   | 0        | 0        | Putative uncharacterized protein<br>OS=Culex quinquefasciatus<br>GN=CpipJ_CPIJ001409 PE=4<br>SV=1 |
| CCG023405.1 | 660   | 305   | 2984 | 19.8572258 | 158.0537847 | 2.992679592  | Up   | 5.30E-13 | 1.37E-12 | AAEL010954-PA OS=Aedes<br>aegypti GN=AAEL010954 PE=4<br>SV=1                                      |
| CCG015183.1 | 309   | 0     | 2985 | 0.001      | 337.7037416 | 18.36539864  | Up   | 4.44E-16 | 1.65E-15 | -                                                                                                 |

|             |       |       |      |            |             |              |      |           |           |                                                                                                   |
|-------------|-------|-------|------|------------|-------------|--------------|------|-----------|-----------|---------------------------------------------------------------------------------------------------|
| CCG018630.1 | 2364  | 526   | 2985 | 9.56094772 | 44.14147892 | 2.206909431  | Up   | 1.08E-13  | 3.37E-13  | AAEL008677-FA OS=Aedes aegypti GN=AAEL008677 PE=4 SV=1                                            |
| CCG005745.2 | 3702  | 292   | 2986 | 3.38929295 | 28.19703253 | 3.056487095  | Up   | 0         | 0         | AAEL006680-FA OS=Aedes aegypti GN=AAEL006680 PE=4 SV=1                                            |
| CCG025505.1 | 20730 | 892   | 2987 | 1.84896301 | 5.037162215 | 1.445894826  | Up   | 2.08E-13  | 5.98E-13  | Putative uncharacterized protein OS=Culex quinquefasciatus GN=CpipJ_CPIJ005572 PE=4 SV=1          |
| CCG015107.1 | 1077  | 353   | 2992 | 14.0838592 | 97.11714401 | 2.78568329   | Up   | 0         | 0         | AAEL003179-FA OS=Aedes aegypti GN=AAEL003179 PE=4 SV=1                                            |
| CCG013193.1 | 4005  | 1157  | 2992 | 12.4134789 | 26.11614584 | 1.073034515  | Up   | 4.14E-12  | 9.55E-12  | AAEL010871-FA OS=Aedes aegypti GN=AAEL010871 PE=4 SV=1                                            |
| CCG021368.1 | 3663  | 15291 | 2993 | 179.374887 | 28.56405197 | -2.650705371 | Down | 0         | 0         | AAEL005422-FA OS=Aedes aegypti GN=AAEL005422 PE=3 SV=1                                            |
| CCG027749.1 | 1791  | 494   | 2995 | 11.8520653 | 58.45898321 | 2.30228626   | Up   | 0         | 0         | Putative uncharacterized protein OS=Culex quinquefasciatus GN=CpipJ_CPIJ003817 PE=4 SV=1          |
| CCG023058.2 | 1314  | 161   | 2996 | 5.26493704 | 79.7069994  | 3.920218234  | Up   | 0         | 0         | Putative uncharacterized protein OS=Culex quinquefasciatus GN=CpipJ_CPIJ012003 PE=4 SV=1          |
| CCG020313.2 | 5085  | 1163  | 2996 | 9.82768955 | 20.59685294 | 1.067499731  | Up   | 4.90E-12  | 1.12E-11  | Multidrug resistance-associated protein 1 OS=Culex quinquefasciatus GN=CpipJ_CPIJ011963 PE=3 SV=1 |
| CCG019627.1 | 48622 | 5233  | 2996 | 4.62466828 | 2.154066003 | -1.102287431 | Down | 2.74E-255 | 1.69E-254 | Monocarboxylate transporter OS=Culex quinquefasciatus GN=CpipJ_CPIJ014208 PE=4 SV=1               |
| CCG027727.1 | 2790  | 109   | 3000 | 1.6787459  | 37.58954492 | 4.484875664  | Up   | 0         | 0         | AAEL013258-FA OS=Aedes aegypti GN=AAEL013258 PE=4 SV=1                                            |
| CCG004218.1 | 2692  | 616   | 3004 | 9.832599   | 39.00990469 | 1.988195761  | Up   | 3.02E-13  | 8.35E-13  | AAEL005214-FA OS=Aedes aegypti GN=AAEL005214 PE=4 SV=1                                            |
| CCG014517.2 | 1531  | 595   | 3008 | 16.6995376 | 68.6835379  | 2.040156197  | Up   | 7.20E-13  | 1.81E-12  | AAEL013484-FA OS=Aedes aegypti GN=AAEL013484 PE=4 SV=1                                            |
| CCG003676.1 | 5801  | 902   | 3012 | 6.68138263 | 18.15106527 | 1.441835635  | Up   | 3.95E-13  | 1.05E-12  | Putative uncharacterized protein OS=Culex quinquefasciatus GN=CpipJ_CPIJ007358 PE=4 SV=1          |

|             |      |       |      |            |             |              |      |           |           |                                                                                                         |
|-------------|------|-------|------|------------|-------------|--------------|------|-----------|-----------|---------------------------------------------------------------------------------------------------------|
| CCG020581.1 | 2676 | 917   | 3014 | 14.7246811 | 39.37378408 | 1.418998982  | Up   | 0         | 0         | AAEL013138-PA OS=Aedes aegypti GN=AAEL013138 PE=4 SV=1                                                  |
| CCG023745.1 | 3030 | 986   | 3014 | 13.9828905 | 34.77367861 | 1.314333069  | Up   | 1.31E-12  | 3.18E-12  | AAEL009264-PA OS=Aedes aegypti GN=AAEL009264 PE=4 SV=1                                                  |
| CCG028183.1 | 6465 | 571   | 3016 | 3.7951614  | 16.30845518 | 2.103386982  | Up   | 0         | 0         | Transcription initiation factor TFIID subunit 1 OS=Culex quinquefasciatus GN=CpipJ_CPIJ003658 PE=4 SV=1 |
| CCG011962.1 | 3453 | 385   | 3018 | 4.79100719 | 30.55432357 | 2.672975659  | Up   | 7.93E-13  | 1.99E-12  | AAEL008617-PA OS=Aedes aegypti GN=AAEL008617 PE=4 SV=1                                                  |
| CCG008911.1 | 1131 | 72144 | 3018 | 2740.94477 | 93.28388974 | -4.8769015   | Down | 0         | 0         | AAEL005961-PA OS=Aedes aegypti GN=AAEL005961 PE=3 SV=1                                                  |
| CCG019084.1 | 1080 | 715   | 3019 | 28.4475558 | 97.72133109 | 1.780368814  | Up   | 0         | 0         | AAEL005493-PA OS=Aedes aegypti GN=AAEL005493 PE=3 SV=1                                                  |
| CCG024930.1 | 2387 | 894   | 3024 | 16.0933987 | 44.28731837 | 1.460424607  | Up   | 5.67E-13  | 1.46E-12  | AAEL006155-PA OS=Aedes aegypti GN=AAEL006155 PE=4 SV=1                                                  |
| CCG028651.1 | 3999 | 1046  | 3028 | 11.2393954 | 26.47003302 | 1.235795558  | Up   | 3.46E-12  | 8.05E-12  | AAEL009678-PA OS=Aedes aegypti GN=AAEL009678 PE=4 SV=1                                                  |
| CCG017657.1 | 1959 | 647   | 3029 | 14.1916377 | 54.05238404 | 1.929317165  | Up   | 0         | 0         | AAEL000825-PA OS=Aedes aegypti GN=AAEL000825 PE=4 SV=1                                                  |
| CCG010157.1 | 5163 | 938   | 3029 | 7.8066262  | 20.50912654 | 1.393494954  | Up   | 1.14E-12  | 2.79E-12  | AAEL013012-PA (Fragment) OS=Aedes aegypti GN=AAEL013012 PE=4 SV=1                                       |
| CCG019745.1 | 4620 | 270   | 3030 | 2.51121826 | 22.92718152 | 3.190599685  | Up   | 2.59E-13  | 7.26E-13  | AAEL012057-PA OS=Aedes aegypti GN=AAEL012057 PE=4 SV=1                                                  |
| CCG027752.1 | 6096 | 498   | 3032 | 3.51032281 | 17.38738438 | 2.30836531   | Up   | 3.42E-13  | 9.27E-13  | AAEL008557-PA (Fragment) OS=Aedes aegypti GN=AAEL008557 PE=4 SV=1                                       |
| CCG014772.1 | 411  | 246   | 3035 | 25.7191112 | 258.1468857 | 3.3272795    | Up   | 2.51E-13  | 7.05E-13  | Histone H2A OS=Aedes aegypti GN=AAEL012499 PE=3 SV=1                                                    |
| CCG007979.1 | 1483 | 5558  | 3035 | 161.042336 | 71.54306811 | -1.170556114 | Down | 1.68E-298 | 1.06E-297 | AAEL004985-PA OS=Aedes aegypti GN=AAEL004985 PE=2 SV=1                                                  |
| CCG027289.1 | 2387 | 291   | 3036 | 5.23845529 | 44.4630617  | 3.085393936  | Up   | 6.00E-14  | 2.00E-13  | AAEL000978-PA (Fragment) OS=Aedes aegypti GN=AAEL000978 PE=4 SV=1                                       |

|             |      |       |      |            |             |              |      |          |          |                                                                            |
|-------------|------|-------|------|------------|-------------|--------------|------|----------|----------|----------------------------------------------------------------------------|
| CCG023864.1 | 1554 | 12647 | 3036 | 349.702853 | 68.29686505 | -2.356238304 | Down | 0        | 0        | AAEL001094-PA OS=Aedes aegypti GN=AAEL001094 PE=3 SV=1                     |
| CCG028495.1 | 2483 | 499   | 3039 | 8.63548029 | 42.78622759 | 2.308798158  | Up   | 0        | 0        | AAEL0008530-PA OS=Aedes aegypti GN=AAEL008530 PE=4 SV=1                    |
| CCG016754.1 | 1443 | 6345  | 3039 | 188.941764 | 73.62314838 | -1.359710285 | Down | 0        | 0        | AAEL010479-PA OS=Aedes aegypti GN=AAEL010479 PE=3 SV=1                     |
| CCG002610.2 | 552  | 273   | 3042 | 21.2513361 | 192.6505035 | 3.180360501  | Up   | 1.53E-14 | 5.41E-14 | AAEL0006229-PA OS=Aedes aegypti GN=AAEL006229 PE=4 SV=1                    |
| CCG007043.1 | 6744 | 270   | 3046 | 1.72031856 | 15.789281   | 3.198197833  | Up   | 2.59E-13 | 7.26E-13 | AAEL001612-PA OS=Aedes aegypti GN=AAEL001612 PE=4 SV=1                     |
| CCG024526.1 | 5196 | 1108  | 3046 | 9.16290723 | 20.49324693 | 1.161271264  | Up   | 4.45E-12 | 1.02E-11 | AAEL005801-PA OS=Aedes aegypti GN=AAEL005801 PE=3 SV=1                     |
| CCG017744.1 | 2298 | 257   | 3047 | 4.80557955 | 46.35242355 | 3.269862439  | Up   | 4.14E-13 | 1.10E-12 | AAEL010847-PA OS=Aedes aegypti GN=AAEL010847 PE=4 SV=1                     |
| CCG012311.1 | 2460 | 576   | 3047 | 10.0612062 | 43.29994688 | 2.105561987  | Up   | 7.26E-13 | 1.83E-12 | AAEL007827-PA OS=Aedes aegypti GN=AAEL007827 PE=4 SV=1                     |
| CCG028182.1 | 3861 | 770   | 3047 | 8.56946274 | 27.58815574 | 1.686772353  | Up   | 0        | 0        | AAEL0006087-PA OS=Aedes aegypti GN=AAEL006087 PE=4 SV=1                    |
| CCG012479.1 | 1295 | 957   | 3047 | 31.754468  | 82.25318095 | 1.373111874  | Up   | 1.76E-12 | 4.21E-12 | Predicted ER protein with RDEL retention signal OS=Aedes aegypti PE=2 SV=1 |
| CCG013429.1 | 2376 | 429   | 3050 | 7.7584243  | 44.87489232 | 2.532072894  | Up   | 0        | 0        | AAEL004068-PA OS=Aedes aegypti GN=AAEL004068 PE=4 SV=1                     |
| CCG017167.1 | 657  | 75    | 3051 | 4.90522085 | 162.3404908 | 5.048560978  | Up   | 0        | 0        | AAEL000695-PA OS=Aedes aegypti GN=AAEL000695 PE=4 SV=1                     |
| CCG022143.1 | 1701 | 11333 | 3054 | 286.288067 | 62.76459569 | -2.189444642 | Down | 0        | 0        | AAEL004034-PA OS=Aedes aegypti GN=CYP4G36 PE=3 SV=1                        |
| CCG018320.1 | 1562 | 138   | 3055 | 3.79630178 | 68.37230188 | 4.170745412  | Up   | 1.49E-13 | 4.45E-13 | AAEL003664-PA OS=Aedes aegypti GN=AAEL003664 PE=4 SV=1                     |
| CCG010685.1 | 1446 | 55    | 3056 | 1.63439516 | 73.88139268 | 5.498382318  | Up   | 0        | 0        | AAEL011653-PA OS=Aedes aegypti GN=AAEL011653 PE=3 SV=1                     |
| CCG020372.1 | 2874 | 738   | 3057 | 11.033982  | 37.18422133 | 1.752737035  | Up   | 0        | 0        | AAEL014329-PA (Fragment) OS=Aedes aegypti GN=AAEL014329 PE=4 SV=1          |

|             |      |      |      |            |             |              |      |          |          |                                                                   |
|-------------|------|------|------|------------|-------------|--------------|------|----------|----------|-------------------------------------------------------------------|
| CCG012473.1 | 2124 | 475  | 3058 | 9.60952163 | 50.33070168 | 2.388902192  | Up   | 6.44E-13 | 1.64E-12 | AAEL005215-PA OS=Aedes aegypti GN=AAEL005215 PE=4 SV=1            |
| CCG017119.1 | 3756 | 622  | 3058 | 7.11586127 | 28.4617706  | 1.999915125  | Up   | 0        | 0        | AAEL009096-PA OS=Aedes aegypti GN=AAEL009096 PE=4 SV=1            |
| CCG004563.1 | 3191 | 1098 | 3059 | 14.7855746 | 33.51218071 | 1.180495256  | Up   | 3.40E-12 | 7.92E-12 | AAEL012286-PA OS=Aedes aegypti GN=AAEL012286 PE=4 SV=1            |
| CCG010329.2 | 3948 | 250  | 3061 | 2.72098117 | 27.10417558 | 3.316316249  | Up   | 2.10E-13 | 6.02E-13 | AAEL000984-PA (Fragment) OS=Aedes aegypti GN=AAEL000984 PE=4 SV=1 |
| CCG019746.1 | 3423 | 440  | 3061 | 5.52342484 | 31.26125773 | 2.50074082   | Up   | 0        | 0        | AAEL012057-PA OS=Aedes aegypti GN=AAEL012057 PE=4 SV=1            |
| CCG025420.2 | 2643 | 698  | 3064 | 11.3480419 | 40.52673478 | 1.83643056   | Up   | 0        | 0        | AAEL009470-PA (Fragment) OS=Aedes aegypti GN=AAEL009470 PE=4 SV=1 |
| CCG024597.1 | 2956 | 945  | 3068 | 13.7369415 | 36.28281229 | 1.401225452  | Up   | 2.91E-12 | 6.82E-12 | AAEL005522-PA OS=Aedes aegypti GN=AAEL005522 PE=4 SV=1            |
| CCG020873.1 | 462  | 6999 | 3068 | 650.963577 | 232.1471713 | -1.487537121 | Down | 0        | 0        | AAEL000179-PA OS=Aedes aegypti GN=AAEL000179 PE=3 SV=1            |
| CCG022630.1 | 1538 | 418  | 3076 | 11.6783804 | 69.91655354 | 2.58179386   | Up   | 6.74E-13 | 1.70E-12 | AAEL009309-PA OS=Aedes aegypti GN=AAEL009309 PE=4 SV=1            |
| CCG003165.1 | 1692 | 287  | 3078 | 7.28860156 | 63.594312   | 3.125183793  | Up   | 2.87E-13 | 7.99E-13 | AAEL004317-PA OS=Aedes aegypti GN=AAEL004317 PE=4 SV=1            |
| CCG004300.1 | 657  | 7430 | 3078 | 485.943878 | 163.7771323 | -1.569055775 | Down | 0        | 0        | AAEL003118-PA OS=Aedes aegypti GN=AAEL003118 PE=4 SV=1            |
| CCG014526.1 | 3105 | 374  | 3079 | 5.17574259 | 34.66555046 | 2.743664896  | Up   | 1.37E-13 | 4.12E-13 | AAEL010827-PA OS=Aedes aegypti GN=AAEL010827 PE=4 SV=1            |
| CCG012264.1 | 2163 | 743  | 3079 | 14.7602926 | 49.76261405 | 1.753340955  | Up   | 0        | 0        | AAEL010903-PA OS=Aedes aegypti GN=AAEL010903 PE=4 SV=1            |
| CCG000540.1 | 2062 | 116  | 3080 | 2.41730806 | 52.21701865 | 4.433046844  | Up   | 1.16E-13 | 3.59E-13 | AAEL002843-PA OS=Aedes aegypti GN=AAEL002843 PE=4 SV=1            |
| CCG017503.1 | 5069 | 367  | 3084 | 3.11104608 | 21.26875628 | 2.773264001  | Up   | 4.12E-13 | 1.09E-12 | AAEL009067-PA OS=Aedes aegypti GN=AAEL009067 PE=4 SV=1            |
| CCG018786.1 | 1975 | 559  | 3087 | 12.1620667 | 54.64111412 | 2.167598499  | Up   | 3.87E-13 | 1.03E-12 | AAEL009647-PA OS=Aedes aegypti GN=AAEL009647 PE=4 SV=1            |
| CCG011248.1 | 1711 | 1137 | 3087 | 28.5544058 | 63.07200491 | 1.143286433  | Up   | 4.86E-12 | 1.11E-11 | -                                                                 |

|             |      |      |      |            |             |             |    |          |          |                                                                                      |
|-------------|------|------|------|------------|-------------|-------------|----|----------|----------|--------------------------------------------------------------------------------------|
| CCG022850.1 | 2259 | 546  | 3092 | 10.3857791 | 47.84904461 | 2.203880667 | Up | 3.03E-13 | 8.37E-13 | AAEL005214-PA OS=Aedes aegypti GN=AAEL005214 PE=4 SV=1                               |
| CCG005892.1 | 4703 | 907  | 3093 | 8.28695498 | 22.99084628 | 1.472145581 | Up | 0        | 0        | AAEL004942-PA OS=Aedes aegypti GN=AAEL004942 PE=4 SV=1                               |
| CCG018089.1 | 669  | 512  | 3096 | 32.8856564 | 161.7800073 | 2.29850296  | Up | 3.04E-13 | 8.39E-13 | AAEL007947-PA OS=Aedes aegypti GN=GSTE3 PE=3 SV=1                                    |
| CCG003444.1 | 751  | 723  | 3099 | 41.3676673 | 144.2552593 | 1.802048406 | Up | 0        | 0        | AAEL012856-PA OS=Aedes aegypti GN=AAEL012856 PE=4 SV=1                               |
| CCG006156.2 | 3559 | 513  | 3101 | 6.19372685 | 30.45957187 | 2.298015999 | Up | 0        | 0        | AAEL001440-PA OS=Aedes aegypti GN=AAEL001440 PE=4 SV=1                               |
| CCG012083.1 | 7665 | 736  | 3101 | 4.12599148 | 14.14293754 | 1.777269058 | Up | 0        | 0        | AAEL006013-PA OS=Aedes aegypti GN=AAEL006013 PE=4 SV=1                               |
| CCG007418.1 | 4828 | 476  | 3103 | 4.23645271 | 22.46800597 | 2.406943422 | Up | 4.62E-13 | 1.21E-12 | SV1 dependent RNA helicase A OS=Culex quinquefasciatus GN=CpipJ_CPIJ003405 PE=4 SV=1 |
| CCG016957.1 | 1487 | 290  | 3105 | 8.38010964 | 72.99626723 | 3.122781667 | Up | 1.62E-13 | 4.77E-13 | AAEL004484-PA OS=Aedes aegypti GN=AAEL004484 PE=4 SV=1                               |
| CCG007992.1 | 738  | 416  | 3106 | 24.2214222 | 147.1279237 | 2.6027156   | Up | 1.20E-14 | 4.28E-14 | AAEL011314-PA OS=Aedes aegypti GN=AAEL011314 PE=2 SV=1                               |
| CCG013839.1 | 4026 | 681  | 3108 | 7.26835302 | 26.98716448 | 1.892573004 | Up | 1.31E-14 | 4.67E-14 | AAEL000747-PA OS=Aedes aegypti GN=AAEL000747 PE=4 SV=1                               |
| CCG011968.1 | 1165 | 1069 | 3108 | 39.4288809 | 93.26208087 | 1.242037855 | Up | 3.42E-12 | 7.98E-12 | Glutathione S-transferase OS=Aedes aegypti PE=2 SV=1                                 |
| CCG026271.1 | 1719 | 101  | 3114 | 2.52469063 | 63.32755897 | 4.64865495  | Up | 0        | 0        | AAEL002968-PA OS=Aedes aegypti GN=AAEL002968 PE=4 SV=1                               |
| CCG003864.1 | 4842 | 652  | 3114 | 5.78609396 | 22.48246053 | 1.958138279 | Up | 1.50E-12 | 3.61E-12 | AAEL002455-PA OS=Aedes aegypti GN=AAEL002455 PE=4 SV=1                               |
| CCG000409.1 | 4404 | 663  | 3115 | 6.46887694 | 24.7263924  | 1.934464592 | Up | 1.08E-13 | 3.38E-13 | AAEL007563-PA (Fragment) OS=Aedes aegypti GN=DUOX PE=4 SV=2                          |
| CCG024287.1 | 3142 | 773  | 3119 | 10.5714847 | 34.70237596 | 1.714856437 | Up | 5.30E-13 | 1.37E-12 | AAEL003559-PA (Fragment) OS=Aedes aegypti GN=AAEL003559 PE=4 SV=1                    |
| CCG000194.1 | 3654 | 934  | 3119 | 10.9835063 | 29.8398646  | 1.441902301 | Up | 3.46E-13 | 9.34E-13 | AAEL006145-PA OS=Aedes aegypti GN=AAEL006145 PE=4 SV=1                               |

|             |      |      |      |            |             |              |      |          |          |                                                                                                         |
|-------------|------|------|------|------------|-------------|--------------|------|----------|----------|---------------------------------------------------------------------------------------------------------|
| CCG006486.1 | 2935 | 6280 | 3121 | 91.9420557 | 37.17369056 | -1.306442998 | Down | 0        | 0        | ATP synthase alpha subunit<br>vacuolar OS=Culex<br>quinquefasciatus<br>GN=CpipJ_CPIJ007772 PE=3<br>SV=1 |
| CCG016531.1 | 2276 | 981  | 3122 | 18.5207863 | 47.95243413 | 1.3724587    | Up   | 4.12E-12 | 9.52E-12 | AAEL0006497-PA OS=Aedes<br>aegypti GN=AAEL008497 PE=4<br>SV=1                                           |
| CCG004947.1 | 5726 | 1155 | 3123 | 8.66748926 | 19.06648592 | 1.137352922  | Up   | 4.50E-12 | 1.04E-11 | AAEL001554-PA OS=Aedes<br>aegypti GN=AAEL001554 PE=4<br>SV=1                                            |
| CCG011505.1 | 6546 | 595  | 3124 | 3.90574276 | 16.68341837 | 2.094746084  | Up   | 7.20E-13 | 1.81E-12 | AAEL007857-PA OS=Aedes<br>aegypti GN=AAEL007857 PE=4<br>SV=1                                            |
| CCG005834.1 | 4822 | 576  | 3129 | 5.13284262 | 22.68445625 | 2.143874146  | Up   | 7.26E-13 | 1.83E-12 | AAEL011963-PA OS=Aedes<br>aegypti GN=AAEL011963 PE=4<br>SV=1                                            |
| CCG020875.1 | 1467 | 320  | 3131 | 9.37308458 | 74.6110188  | 2.992792902  | Up   | 0        | 0        | AAEL000193-PA OS=Aedes<br>aegypti GN=AAEL000193 PE=4<br>SV=1                                            |
| CCG002140.1 | 4272 | 494  | 3131 | 4.96887849 | 25.62134002 | 2.366353765  | Up   | 0        | 0        | AAEL010414-PA OS=Aedes<br>aegypti GN=AAEL010414 PE=4<br>SV=1                                            |
| CCG003695.1 | 1591 | 502  | 3131 | 13.5580181 | 68.79595511 | 2.343177443  | Up   | 6.14E-13 | 1.57E-12 | AAEL005064-PA OS=Aedes<br>aegypti GN=CLIPB5 PE=3 SV=1                                                   |
| CCG004682.1 | 1326 | 1081 | 3132 | 35.0303794 | 82.57113337 | 1.237030893  | Up   | 3.20E-12 | 7.49E-12 | AAEL001810-PA OS=Aedes<br>aegypti GN=AAEL001810 PE=4<br>SV=1                                            |
| CCG022797.1 | 3516 | 698  | 3137 | 8.53039669 | 31.19002111 | 1.870399791  | Up   | 0        | 0        | SV=1 OS=Culex quinquefasciatus<br>GN=CpipJ_CPIJ000640 PE=4<br>SV=1                                      |
| CCG000616.1 | 2532 | 1157 | 3138 | 19.6350644 | 43.32506813 | 1.141769692  | Up   | 4.14E-12 | 9.55E-12 | Splicing factor 5B subunit 2<br>OS=Culex quinquefasciatus<br>GN=CpipJ_CPIJ010596 PE=4<br>SV=1           |
| CCG002298.2 | 2637 | 490  | 3139 | 7.98451648 | 41.61320849 | 2.381764578  | Up   | 0        | 0        | AAEL002145-PA OS=Aedes<br>aegypti GN=AAEL002145 PE=4<br>SV=1                                            |
| CCG016541.1 | 4536 | 606  | 3145 | 5.7406656  | 24.23804684 | 2.077983522  | Up   | 3.75E-13 | 1.00E-12 | AAEL007521-PA OS=Aedes<br>aegypti GN=AAEL007521 PE=4<br>SV=1                                            |
| CCG009903.1 | 3898 | 889  | 3147 | 9.79992152 | 28.22311365 | 1.526035058  | Up   | 0        | 0        | AAEL009040-PA OS=Aedes<br>aegypti GN=AAEL009040 PE=4<br>SV=1                                            |
| CCG022447.1 | 6822 | 198  | 3155 | 1.24714269 | 16.16730625 | 3.696380874  | Up   | 0        | 0        | AAEL010499-PA (Fragment)<br>OS=Aedes aegypti<br>GN=AAEL010499 PE=4 SV=1                                 |



|             |       |       |      |            |             |              |      |           |           |                                                                       |
|-------------|-------|-------|------|------------|-------------|--------------|------|-----------|-----------|-----------------------------------------------------------------------|
| CCG012959.1 | 5844  | 601   | 3156 | 4.41902986 | 18.87890512 | 2.094973513  | Up   | 0         | 0         | AAEL000386-PA OS=Aedes aegypti GN=AAEL000386 PE=4 SV=1                |
| CCG025583.1 | 5250  | 793   | 3160 | 6.4904761  | 21.04155326 | 1.696844991  | Up   | 0         | 0         | AAEL000409-PA OS=Culex quinquefasciatus GN=CpipJ_CPIJ005144 PE=4 SV=1 |
| CCG014949.1 | 26271 | 25961 | 3160 | 42.4626881 | 4.204946694 | -3.336036289 | Down | 0         | 0         | AAEL009863-PA OS=Aedes aegypti GN=AAEL009863 PE=4 SV=1                |
| CCG024099.2 | 5318  | 656   | 3162 | 5.30051634 | 20.78564708 | 1.971382852  | Up   | 9.98E-13  | 2.47E-12  | AAEL007252-PA OS=Aedes aegypti GN=AAEL007252 PE=4 SV=1                |
| CCG010173.1 | 3018  | 405   | 3163 | 5.76631627 | 36.63784938 | 2.667612947  | Up   | 2.34E-13  | 6.64E-13  | AAEL000409-PA OS=Aedes aegypti GN=AAEL006469 PE=4 SV=1                |
| CCG019499.2 | 4642  | 225   | 3168 | 2.08276396 | 23.8577813  | 3.517888633  | Up   | 0         | 0         | AAEL009397-PA OS=Aedes aegypti GN=AAEL009397 PE=4 SV=1                |
| CCG010270.1 | 6456  | 949   | 3168 | 6.316338   | 17.15424734 | 1.441405547  | Up   | 1.30E-12  | 3.15E-12  | AAEL004720-PA (Fragment) OS=Aedes aegypti GN=AAEL004720 PE=4 SV=1     |
| CCG022003.2 | 1032  | 22    | 3173 | 0.91602147 | 107.4831514 | 6.874513391  | Up   | 8.38E-11  | 1.80E-10  | AAEL007097-PA OS=Aedes aegypti GN=AAEL007097 PE=4 SV=1                |
| CCG010445.1 | 2766  | 1146  | 3174 | 17.8030788 | 40.11481217 | 1.172008288  | Up   | 4.08E-12  | 9.43E-12  | AAEL007470-PA OS=Aedes aegypti GN=AAEL007470 PE=4 SV=1                |
| CCG021366.1 | 4482  | 317   | 3176 | 3.03913563 | 24.77186234 | 3.026969371  | Up   | 2.22E-13  | 6.35E-13  | AAEL003162-PA OS=Aedes aegypti GN=AAEL003162 PE=4 SV=1                |
| CCG000065.1 | 654   | 1134  | 3179 | 74.5071545 | 169.9271588 | 1.18946558   | Up   | 2.06E-12  | 4.92E-12  | -                                                                     |
| CCG021499.1 | 633   | 0     | 3183 | 0.001      | 175.7854581 | 17.4234562   | Up   | 4.44E-16  | 1.63E-15  | 30 kDa salivary gland allergen OS=Aedes albopictus PE=2 SV=1          |
| CCG010321.1 | 1909  | 756   | 3187 | 17.0168252 | 58.36146049 | 1.778054083  | Up   | 0         | 0         | AAEL000577-PA OS=Aedes aegypti GN=AAEL006577 PE=3 SV=1                |
| CCG016391.1 | 2895  | 6902  | 3191 | 102.444597 | 38.53259454 | -1.410692661 | Down | 0         | 0         | AAEL013800-PA OS=Aedes aegypti GN=AAEL013800 PE=4 SV=1                |
| CCG016660.1 | 6588  | 793   | 3192 | 5.17228287 | 16.93789002 | 1.711381084  | Up   | 0         | 0         | AAEL004375-PA OS=Aedes aegypti GN=AAEL004375 PE=4 SV=1                |
| CCG018707.1 | 948   | 5676  | 3192 | 257.274487 | 117.7076155 | -1.128100734 | Down | 2.94E-287 | 1.84E-286 | AAEL003596-PA OS=Aedes aegypti GN=AAEL003596 PE=4 SV=1                |
| CCG005064.1 | 1329  | 271   | 3193 | 8.7620753  | 83.98929852 | 3.260861     | Up   | 0         | 0         | AAEL005904-PA OS=Aedes aegypti GN=AAEL005904 PE=4 SV=1                |

|             |      |      |      |            |             |              |      |           |           |                                                                                          |
|-------------|------|------|------|------------|-------------|--------------|------|-----------|-----------|------------------------------------------------------------------------------------------|
| CCG011099.1 | 7304 | 8427 | 3196 | 49.5763901 | 15.29663918 | -1.696438513 | Down | 0         | 0         | -                                                                                        |
| CCG004333.1 | 504  | 986  | 3199 | 84.0638062 | 221.8879512 | 1.400274645  | Up   | 1.31E-12  | 3.18E-12  | AGAP002251-PA OS=Anopheles gambiae GN=AGAP002251 PE=3 SV=4                               |
| CCG019681.1 | 1767 | 699  | 3200 | 16.9982142 | 63.30870723 | 1.897020748  | Up   | 0         | 0         | AAEL012750-PA OS=Aedes aegypti GN=AAEL012750 PE=4 SV=1                                   |
| CCG015283.1 | 2414 | 5263 | 3204 | 93.6825656 | 46.39864075 | -1.013698043 | Down | 6.18E-224 | 3.74E-223 | AAEL000339-PA OS=Aedes aegypti GN=AAEL000339 PE=4 SV=1                                   |
| CCG024423.1 | 2513 | 566  | 3206 | 9.6780222  | 44.59858151 | 2.204213671  | Up   | 6.91E-14  | 2.25E-13  | AAEL003539-PA OS=Aedes aegypti GN=AAEL003539 PE=4 SV=1                                   |
| CCG022184.1 | 4899 | 1178 | 3206 | 10.3323836 | 22.87736994 | 1.14674809   | Up   | 4.91E-12  | 1.12E-11  | Rho GTPase-activating protein 5 OS=Culex quinquefasciatus GN=CpipJ_CPIJ009693 PE=4 SV=1  |
| CCG026969.1 | 4064 | 5364 | 3207 | 56.7149745 | 27.58641575 | -1.03977168  | Down | 6.61E-238 | 4.04E-237 | AAEL008723-PA OS=Aedes aegypti GN=AAEL008723 PE=4 SV=1                                   |
| CCG002780.1 | 1641 | 583  | 3208 | 15.2659082 | 68.34012912 | 2.162419557  | Up   | 2.70E-13  | 7.53E-13  | Putative uncharacterized protein OS=Culex quinquefasciatus GN=CpipJ_CPIJ000417 PE=4 SV=1 |
| CCG001509.1 | 9205 | 774  | 3209 | 3.61309881 | 12.18697557 | 1.754031522  | Up   | 0         | 0         | DNA-directed RNA polymerase OS=Culex quinquefasciatus GN=CpipJ_CPIJ007655 PE=3 SV=1      |
| CCG010776.1 | 4954 | 912  | 3212 | 7.91045579 | 22.66572164 | 1.518679367  | Up   | 0         | 0         | AAEL012935-PA OS=Aedes aegypti GN=AAEL012935 PE=4 SV=1                                   |
| CCG000523.1 | 1468 | 1244 | 3213 | 36.4130449 | 76.51290413 | 1.071247699  | Up   | 1.32E-12  | 3.20E-12  | AAEL008645-PA OS=Aedes aegypti GN=AAEL008645 PE=4 SV=1                                   |
| CCG022780.1 | 2466 | 303  | 3215 | 5.27973625 | 45.57617998 | 3.109742243  | Up   | 1.37E-13  | 4.14E-13  | AAEL011023-PA OS=Aedes aegypti GN=AAEL011023 PE=4 SV=1                                   |
| CCG018879.1 | 4428 | 1051 | 3215 | 10.1990043 | 25.38185633 | 1.315369272  | Up   | 3.63E-12  | 8.44E-12  | AAEL012701-PA OS=Aedes aegypti GN=AAEL012701 PE=3 SV=1                                   |
| CCG013119.1 | 6576 | 1166 | 3216 | 7.61902533 | 17.09638353 | 1.166012822  | Up   | 2.46E-12  | 5.80E-12  | ADAM metalloprotease OS=Culex quinquefasciatus GN=CpipJ_CPIJ012681 PE=4 SV=1             |
| CCG026626.1 | 6468 | 1119 | 3218 | 7.43400325 | 17.39266151 | 1.226267494  | Up   | 5.84E-12  | 1.32E-11  | AAEL009219-PA OS=Aedes aegypti GN=AAEL009219 PE=4 SV=1                                   |

|             |      |       |      |            |             |              |      |          |          |                                                                                            |
|-------------|------|-------|------|------------|-------------|--------------|------|----------|----------|--------------------------------------------------------------------------------------------|
| CCG001776.1 | 4818 | 306   | 3221 | 2.72908651 | 23.37081974 | 3.098218307  | Up   | 0        | 0        | AAEL005814-PA OS=Aedes aegypti GN=AAEL005814 PE=4 SV=1                                     |
| CCG023664.2 | 5982 | 6588  | 3221 | 47.3227368 | 18.82323796 | -1.330018691 | Down | 0        | 0        | AAEL005858-PA OS=Aedes aegypti GN=AAEL003658 PE=4 SV=1                                     |
| CCG011932.1 | 333  | 22227 | 3221 | 2868.13301 | 338.1399684 | -3.08441947  | Down | 0        | 0        | AAEL005234-PA OS=Aedes aegypti GN=AAEL003234 PE=3 SV=1                                     |
| CCG026097.1 | 1894 | 818   | 3224 | 18.5582064 | 59.50659151 | 1.680992199  | Up   | 0        | 0        | AAEL008100-PA OS=Aedes aegypti GN=AAEL008100 PE=4 SV=1                                     |
| CCG023865.1 | 3794 | 336   | 3226 | 3.80543775 | 29.72467076 | 2.965526504  | Up   | 1.75E-13 | 5.12E-13 | AAEL001099-PA OS=Aedes aegypti GN=AAEL001099 PE=4 SV=1                                     |
| CCG012671.1 | 1617 | 772   | 3232 | 20.5149259 | 69.87331511 | 1.768067649  | Up   | 2.17E-12 | 5.16E-12 | Guanine nucleotide exchange factor OS=Culex quinquefasciatus GN=CpipJ_CPIJ017598 PE=4 SV=1 |
| CCG026219.1 | 5121 | 303   | 3238 | 2.5424389  | 22.10406174 | 3.120026491  | Up   | 1.37E-13 | 4.14E-13 | Putative uncharacterized protein OS=Culex quinquefasciatus GN=CpipJ_CPIJ007864 PE=4 SV=1   |
| CCG025043.1 | 2664 | 625   | 3241 | 10.0811127 | 42.52994558 | 2.07682413   | Up   | 0        | 0        | AAEL005390-PA (Fragment) OS=Aedes aegypti GN=AAEL005390 PE=4 SV=1                          |
| CCG013979.1 | 939  | 181   | 3242 | 8.282771   | 120.6972666 | 3.865135692  | Up   | 1.53E-13 | 4.55E-13 | AAEL010422-PA OS=Aedes aegypti GN=AAEL010422 PE=4 SV=1                                     |
| CCG002382.1 | 1758 | 130   | 3245 | 3.17751166 | 64.52764967 | 4.343948154  | Up   | 0        | 0        | Putative uncharacterized protein OS=Culex quinquefasciatus GN=CpipJ_CPIJ012003 PE=4 SV=1   |
| CCG023756.1 | 2688 | 1252  | 3247 | 20.014177  | 42.22824579 | 1.077186026  | Up   | 5.40E-12 | 1.22E-11 | AAEL006040-PA (Fragment) OS=Aedes aegypti GN=AAEL006040 PE=4 SV=1                          |
| CCG013169.3 | 2376 | 10367 | 3251 | 187.486212 | 47.83222129 | -1.970729803 | Down | 0        | 0        | AAEL000678-PA OS=Aedes aegypti GN=AAEL000678 PE=4 SV=1                                     |
| CCG022945.1 | 1857 | 534   | 3258 | 12.3564019 | 61.33229172 | 2.311388161  | Up   | 0        | 0        | AAEL011217-PA OS=Aedes aegypti GN=AAEL011217 PE=4 SV=1                                     |
| CCG026821.1 | 465  | 660   | 3261 | 60.9893007 | 245.1590119 | 2.007089715  | Up   | 0        | 0        | AAEL011104-PA OS=Aedes aegypti GN=AAEL011104 PE=4 SV=1                                     |

|             |      |       |      |            |             |              |      |          |          |                                                                                               |
|-------------|------|-------|------|------------|-------------|--------------|------|----------|----------|-----------------------------------------------------------------------------------------------|
| CCG025387.1 | 3471 | 1144  | 3261 | 14.1623095 | 32.84325571 | 1.213540593  | Up   | 3.55E-12 | 8.26E-12 | AGAP009115-PA (Fragment)<br>OS=Anopheles gambiae<br>GN=AGAP009115 PE=4 SV=4                   |
| CCG010316.1 | 4173 | 561   | 3263 | 5.77666454 | 27.33497654 | 2.242439515  | Up   | 0        | 0        | Sub1 OS=Culex quinquefasciatus<br>GN=CpipJ_CPIJ013695 PE=4<br>SV=1                            |
| CCG006483.1 | 3093 | 1163  | 3263 | 16.1570648 | 36.87968222 | 1.190661094  | Up   | 4.90E-12 | 1.12E-11 | AAEL0008800-PA OS=Aedes<br>aegypti GN=AAEL008800 PE=4<br>SV=1                                 |
| CCG024791.1 | 2242 | 519   | 3267 | 9.94705275 | 50.94053979 | 2.356473215  | Up   | 0        | 0        | AAEL001715-PA OS=Aedes<br>aegypti GN=AAEL001715 PE=3<br>SV=1                                  |
| CCG027692.1 | 1833 | 632   | 3268 | 14.8155332 | 62.32604937 | 2.072724724  | Up   | 0        | 0        | Adaptin, alpha/gamma/epsilon<br>OS=Culex quinquefasciatus<br>GN=CpipJ_CPIJ018379 PE=4<br>SV=1 |
| CCG001293.3 | 4236 | 476   | 3276 | 4.82851598 | 27.03572113 | 2.485215082  | Up   | 4.62E-13 | 1.21E-12 | AAEL0006680-PA OS=Aedes<br>aegypti GN=AAEL006680 PE=4<br>SV=1                                 |
| CCG019023.1 | 2205 | 1089  | 3277 | 21.2217873 | 51.9538653  | 1.291684923  | Up   | 3.37E-12 | 7.86E-12 | AAEL0008854-PA OS=Aedes<br>aegypti GN=AAEL008854 PE=4<br>SV=1                                 |
| CCG011827.1 | 3057 | 27515 | 3278 | 386.755724 | 37.48551889 | -3.367017365 | Down | 0        | 0        | -                                                                                             |
| CCG000230.1 | 4064 | 1014  | 3280 | 10.7212871 | 28.21435724 | 1.395951366  | Up   | 4.79E-12 | 1.09E-11 | AAEL003368-PA OS=Aedes<br>aegypti GN=AAEL003368 PE=4<br>SV=1                                  |
| CCG015821.1 | 2498 | 488   | 3282 | 8.39440772 | 45.92996972 | 2.45193539   | Up   | 9.43E-13 | 2.34E-12 | AGAP005404-PA OS=Anopheles<br>gambiae GN=AGAP005404 PE=4<br>SV=3                              |
| CCG012144.2 | 6568 | 1301  | 3282 | 8.51151412 | 17.46849336 | 1.037267481  | Up   | 0        | 0        | AAEL001296-PA OS=Aedes<br>aegypti GN=AAEL001296 PE=4<br>SV=1                                  |
| CCG008386.1 | 3636 | 622   | 3284 | 7.35070818 | 31.57397715 | 2.102780845  | Up   | 0        | 0        | AAEL014998-PA OS=Aedes<br>aegypti GN=AAEL014998 PE=4<br>SV=1                                  |
| CCG013869.1 | 2983 | 827   | 3284 | 11.9128295 | 38.4857462  | 1.691808096  | Up   | 1.96E-12 | 4.67E-12 | AAEL010483-PA OS=Aedes<br>aegypti GN=AAEL010483 PE=4<br>SV=1                                  |
| CCG017498.1 | 3878 | 1305  | 3285 | 14.459903  | 29.61267127 | 1.034156768  | Up   | 8.11E-12 | 1.81E-11 | AAEL0008020-PA OS=Aedes<br>aegypti GN=AAEL008020 PE=4<br>SV=1                                 |
| CCG026494.1 | 3198 | 204   | 3288 | 2.74103373 | 35.94209319 | 3.712882446  | Up   | 6.59E-14 | 2.17E-13 | Sub1 OS=Culex quinquefasciatus<br>GN=CpipJ_CPIJ009759 PE=4<br>SV=1                            |
| CCG007000.1 | 2755 | 1083  | 3291 | 16.8915508 | 41.75959668 | 1.305805987  | Up   | 4.78E-12 | 1.09E-11 | AAEL003973-PA OS=Aedes<br>aegypti GN=AAEL003973 PE=4<br>SV=1                                  |

|             |       |       |      |            |             |              |      |          |          |                                                                       |
|-------------|-------|-------|------|------------|-------------|--------------|------|----------|----------|-----------------------------------------------------------------------|
| CCG021885.1 | 3560  | 681   | 3292 | 8.21977227 | 32.32658627 | 1.975550836  | Up   | 1.31E-14 | 4.67E-14 | AAEL012236-PA OS=Aedes aegypti GN=AAEL012236 PE=4 SV=1                |
| CCG004923.1 | 3141  | 325   | 3294 | 4.44608843 | 36.66111547 | 3.043642136  | Up   | 1.19E-13 | 3.66E-13 | AAEL011876-PA OS=Aedes aegypti GN=AAEL011876 PE=4 SV=1                |
| CCG006466.1 | 9160  | 1130  | 3295 | 5.30085154 | 12.57505698 | 1.246268896  | Up   | 2.84E-12 | 6.65E-12 | -                                                                     |
| CCG003027.1 | 1743  | 425   | 3309 | 10.4774166 | 66.36657363 | 2.663173749  | Up   | 1.58E-12 | 3.80E-12 | AAEL002978-PA OS=Aedes aegypti GN=AAEL002978 PE=4 SV=1                |
| CCG005812.2 | 2070  | 678   | 3312 | 14.074145  | 55.93324284 | 1.990658698  | Up   | 2.72E-13 | 7.58E-13 | -                                                                     |
| CCG016005.1 | 2114  | 911   | 3315 | 18.5172319 | 54.81867904 | 1.565799115  | Up   | 0        | 0        | AAEL001378-PA OS=Aedes aegypti GN=AAEL001378 PE=4 SV=1                |
| CCG020491.1 | 34506 | 995   | 3316 | 1.23905657 | 3.359463449 | 1.43898878   | Up   | 2.47E-12 | 5.84E-12 | AAEL003548-PA (Fragment) OS=Aedes aegypti GN=AAEL003548 PE=4 SV=1     |
| CCG003465.1 | 12532 | 462   | 3318 | 1.58410608 | 9.255630572 | 2.546662333  | Up   | 0        | 0        | AAEL008611-PA (Fragment) OS=Aedes aegypti GN=AAEL008611 PE=4 SV=1     |
| CCG004055.1 | 2527  | 505   | 3320 | 8.58714522 | 45.92856307 | 2.419141152  | Up   | 0        | 0        | AAEL007637-PA OS=Aedes aegypti GN=AAEL007637 PE=3 SV=1                |
| CCG005539.1 | 1827  | 177   | 3322 | 4.16291353 | 63.56398218 | 3.932544012  | Up   | 0        | 0        | AAEL008381-PA (Fragment) OS=Aedes aegypti GN=AAEL008381 PE=3 SV=1     |
| CCG020156.1 | 3432  | 159   | 3327 | 1.99073071 | 33.88874907 | 4.089436399  | Up   | 5.53E-14 | 1.85E-13 | AAEL013690-PA OS=Aedes aegypti GN=AAEL013690 PE=4 SV=1                |
| CCG017275.1 | 3942  | 762   | 3336 | 8.30617397 | 29.58417334 | 1.83256959   | Up   | 5.84E-13 | 1.50E-12 | AAEL010974-PA OS=Aedes aegypti GN=AAEL010974 PE=4 SV=1                |
| CCG018837.1 | 2397  | 6912  | 3338 | 123.90772  | 48.6819891  | -1.347806059 | Down | 0        | 0        | AAEL010974-PA OS=Culex quinquefasciatus GN=CpipJ_CPIJ006896 PE=4 SV=1 |
| CCG009439.1 | 13641 | 1106  | 3340 | 3.4839474  | 8.559537015 | 1.296809921  | Up   | 2.74E-12 | 6.43E-12 | AAEL004834-PA OS=Aedes aegypti GN=AAEL004834 PE=4 SV=1                |
| CCG024407.1 | 513   | 13949 | 3341 | 1168.39148 | 227.6717401 | -2.359496608 | Down | 0        | 0        | Cytochrome c oxidase polypeptide VIIc OS=Aedes albopictus PE=4 SV=1   |
| CCG011197.1 | 1891  | 354   | 3346 | 8.04404339 | 61.85636916 | 2.942929384  | Up   | 0        | 0        | AAEL013539-PA OS=Aedes aegypti GN=AAEL013539 PE=4 SV=1                |

|             |       |       |      |            |             |              |      |           |           |                                                                                          |
|-------------|-------|-------|------|------------|-------------|--------------|------|-----------|-----------|------------------------------------------------------------------------------------------|
| CCG013063.1 | 1370  | 43159 | 3351 | 1353.6721  | 85.50743465 | -3.984684642 | Down | 0         | 0         | AAEL008166-PA OS=Aedes aegypti GN=AAEL008166 PE=3 SV=1                                   |
| CCG006049.1 | 2403  | 182   | 3357 | 3.25447012 | 48.83684358 | 3.907475385  | Up   | 0         | 0         | AAEL011827-PA OS=Aedes aegypti GN=AAEL011827 PE=4 SV=1                                   |
| CCG022910.1 | 3165  | 776   | 3357 | 10.5353915 | 37.07896844 | 1.815357183  | Up   | 6.58E-13  | 1.67E-12  | Impd1m-7 OS=Culex quinquefasciatus GN=CpipJ_CPIJ002096 PE=4 SV=1                         |
| CCG019139.1 | 14829 | 1237  | 3360 | 3.58443332 | 7.92095286  | 1.143928937  | Up   | 1.34E-13  | 4.07E-13  | AAEL002306-PA OS=Aedes aegypti GN=AAEL002306 PE=4 SV=1                                   |
| CCG018076.1 | 1118  | 10156 | 3363 | 390.340451 | 105.1562476 | -1.892198412 | Down | 0         | 0         | Triosephosphate isomerase OS=Aedes aegypti GN=AAEL002542 PE=3 SV=1                       |
| CCG014318.1 | 8199  | 5703  | 3368 | 29.8885713 | 14.36022395 | -1.05751569  | Down | 6.68E-260 | 4.13E-259 | AAEL006222-PA OS=Aedes aegypti GN=AAEL006222 PE=4 SV=1                                   |
| CCG005843.1 | 387   | 37169 | 3369 | 4126.98208 | 304.326704  | -3.761394337 | Down | 0         | 0         | AAEL008844-PA OS=Aedes aegypti GN=AAEL008844 PE=4 SV=1                                   |
| CCG000761.1 | 2871  | 1100  | 3370 | 16.4634999 | 41.03427124 | 1.317558271  | Up   | 3.70E-12  | 8.58E-12  | Atser1e-resistance protein OS=Culex quinquefasciatus GN=CpipJ_CPIJ002829 PE=4 SV=1       |
| CCG028253.1 | 4014  | 217   | 3373 | 2.32297768 | 29.37575176 | 3.660578574  | Up   | 1.47E-13  | 4.37E-13  | AAEL006191-PA OS=Aedes aegypti GN=AAEL006191 PE=4 SV=1                                   |
| CCG014196.1 | 3034  | 271   | 3373 | 3.83810088 | 38.86429385 | 3.339980765  | Up   | 0         | 0         | AAEL012057-PA OS=Aedes aegypti GN=AAEL012057 PE=4 SV=1                                   |
| CCG005270.1 | 1160  | 941   | 3374 | 34.8573451 | 101.6803671 | 1.544506549  | Up   | 0         | 0         | AAEL012282-PA OS=Aedes aegypti GN=AAEL012282 PE=4 SV=1                                   |
| CCG000490.1 | 3238  | 357   | 3375 | 4.73755258 | 36.43736384 | 2.943204727  | Up   | 3.04E-13  | 8.40E-13  | AAEL003152-PA OS=Aedes aegypti GN=AAEL003152 PE=4 SV=1                                   |
| CCG024145.1 | 2226  | 857   | 3377 | 16.5431548 | 53.03418718 | 1.680688274  | Up   | 1.00E-12  | 2.48E-12  | Putative uncharacterized protein OS=Culex quinquefasciatus GN=CpipJ_CPIJ009997 PE=4 SV=1 |
| CCG011615.1 | 4901  | 610   | 3378 | 5.34820202 | 24.09489062 | 2.171601384  | Up   | 3.62E-13  | 9.72E-13  | DNA topoisomerase 2 (Fragment) OS=Aedes aegypti GN=AAEL012584 PE=3 SV=1                  |
| CCG004637.1 | 2724  | 815   | 3378 | 12.8562165 | 43.35134322 | 1.753610568  | Up   | 1.33E-12  | 3.23E-12  | AAEL007971-PA OS=Aedes aegypti GN=AAEL007971 PE=4 SV=1                                   |

|             |       |       |      |            |             |              |      |          |            |                                                                                          |
|-------------|-------|-------|------|------------|-------------|--------------|------|----------|------------|------------------------------------------------------------------------------------------|
| CCG008891.1 | 2432  | 984   | 3381 | 17.3857808 | 48.59947935 | 1.483032999  | Up   | 1.56E-12 | 3.75E-12   | AAEL001187-PA OS=Aedes aegypti GN=AAEL001187 PE=4 SV=1                                   |
| CCG020092.1 | 1224  | 1137  | 3391 | 39.9155133 | 96.84927821 | 1.278791734  | Up   | 4.86E-12 | 1.11E-11   | AAEL001379-PA OS=Aedes aegypti GN=AAEL001379 PE=4 SV=1                                   |
| CCG015389.1 | 11921 | 8200  | 3397 | 29.5572371 | 9.96168662  | -1.569049488 | Down | 0        | 0          | AAEL0008773-PA OS=Aedes aegypti GN=AAEL008773 PE=4 SV=1                                  |
| CCG018073.1 | 1491  | 116   | 3398 | 3.34305112 | 79.67017067 | 4.574802346  | Up   | 1.16E-13 | 3.59E-13   | AAEL002557-PA OS=Aedes aegypti GN=AAEL002557 PE=4 SV=1                                   |
| CCG008652.1 | 6081  | 855   | 3402 | 6.04162524 | 19.55731912 | 1.69470002   | Up   | 0        | 0          | AAEL006022-PA (Fragment) OS=Aedes aegypti GN=AAEL006022 PE=4 SV=1                        |
| CCG028645.1 | 26274 | 7927  | 3402 | 12.9641884 | 4.526454197 | -1.518078632 | Down | 0        | 0          | AAEL002815-PA OS=Aedes aegypti GN=AAEL002815 PE=4 SV=1                                   |
| CCG014798.2 | 5229  | 985   | 3405 | 8.09431796 | 22.76399549 | 1.491772372  | Up   | 3.31E-12 | 7.72E-12   | AAEL000343-PA OS=Aedes aegypti GN=AAEL000343 PE=4 SV=1                                   |
| CCG000929.1 | 3356  | 226   | 3407 | 2.89367104 | 35.48952591 | 3.616420473  | Up   | 2.04E-14 | 7.16E-14   | AAEL013313-PA OS=Aedes aegypti GN=AAEL013313 PE=4 SV=1                                   |
| CCG019773.1 | 2098  | 1384  | 3407 | 28.3460976 | 56.76970875 | 1.001971208  | Up   | 3.46E-12 | 8.06E-12   | AAEL005493-PA OS=Aedes aegypti GN=AAEL005493 PE=3 SV=1                                   |
| CCG027373.1 | 761   | 0     | 3413 | 0.001      | 156.7839667 | 17.25841851  | Up   | 4.44E-16 | 1.64E-15   | -                                                                                        |
| CCG011390.1 | 917   | 1259  | 3419 | 58.9955244 | 130.3406197 | 1.143609344  | Up   | 1.23E-12 | 2.99E-12   | AAEL000670-PA OS=Aedes aegypti GN=AAEL000670 PE=3 SV=1                                   |
| CCG017656.2 | 4877  | 731   | 3420 | 6.44061431 | 24.51451847 | 1.928366218  | Up   | 0        | 0          | Putative uncharacterized protein OS=Culex quinquefasciatus GN=CpipJ_CPIJ002396 PE=4 SV=1 |
| CCG025685.1 | 2085  | 558   | 3422 | 11.4998139 | 57.37516696 | 2.318815936  | Up   | 2.34E-13 | 6.64E-13   | AAEL011425-PA OS=Aedes aegypti GN=AAEL011425 PE=4 SV=1                                   |
| CCG024366.2 | 1893  | 1314  | 3424 | 29.8268522 | 63.23145255 | 1.08403063   | Up   | 1.36E-12 | 3.30E-12   | AAEL007043-PA OS=Aedes aegypti GN=AAEL007043 PE=4 SV=1                                   |
| CCG004908.1 | 743   | 18091 | 3425 | 1046.25231 | 161.1468344 | -2.69878306  | Down | 0        | 0          | -                                                                                        |
| CCG006392.1 | 1683  | 2     | 3430 | 0.05106326 | 71.24592355 | 10.44630606  | Up   | 9.36E-05 | 0.00015362 | AAEL000335-PA OS=Aedes aegypti GN=AAEL000335 PE=4 SV=1                                   |
| CCG016652.1 | 2110  | 141   | 3431 | 2.87143724 | 56.84447754 | 4.307175262  | Up   | 0        | 0          | AAEL002843-PA OS=Aedes aegypti GN=AAEL002843 PE=4 SV=1                                   |

|             |      |      |      |            |             |             |    |          |          |                                                                                                 |
|-------------|------|------|------|------------|-------------|-------------|----|----------|----------|-------------------------------------------------------------------------------------------------|
| CCG020060.1 | 4234 | 1210 | 3433 | 12.2799667 | 28.34477188 | 1.206776014 | Up | 2.72E-12 | 6.41E-12 | AAEL007987-PA OS=Aedes aegypti GN=AAEL007987 PE=4 SV=1                                          |
| CCG012551.1 | 2895 | 678  | 3435 | 10.0633783 | 41.47899161 | 2.043266124 | Up | 2.72E-13 | 7.58E-13 | AAEL002774-PA OS=Aedes aegypti GN=AAEL002774 PE=4 SV=1                                          |
| CCG023536.1 | 2529 | 402  | 3436 | 6.83030182 | 47.49570541 | 2.797775834 | Up | 0        | 0        | AAEL000118-PA OS=Aedes aegypti GN=AAEL000118 PE=4 SV=1                                          |
| CCG017905.1 | 3090 | 1269 | 3436 | 17.6467939 | 38.8726987  | 1.139351171 | Up | 4.37E-12 | 1.00E-11 | AAEL004808-PA OS=Aedes aegypti GN=AAEL004808 PE=4 SV=1                                          |
| CCG028180.2 | 1160 | 1354 | 3438 | 50.1560523 | 103.6090996 | 1.04665501  | Up | 1.91E-12 | 4.57E-12 | AAEL004278-PA OS=Aedes aegypti GN=AAEL004278 PE=4 SV=1                                          |
| CCG021913.1 | 3216 | 495  | 3441 | 6.61381176 | 37.40405173 | 2.499640666 | Up | 1.42E-13 | 4.26E-13 | AAEL03207 OS=Culex quinquefasciatus GN=CpipJ_CPIJ006841 PE=4 SV=1                               |
| CCG013306.1 | 171  | 1039 | 3448 | 261.085113 | 704.8896977 | 1.432877324 | Up | 2.45E-12 | 5.79E-12 | 40S ribosomal protein S29 OS=Aedes aegypti GN=AAEL007824 PE=4 SV=1                              |
| CCG028009.1 | 9597 | 964  | 3449 | 4.31622634 | 12.5634153  | 1.541386281 | Up | 1.62E-12 | 3.89E-12 | histone-lysine N-methyltransferase ash1 OS=Culex quinquefasciatus GN=CpipJ_CPIJ001202 PE=4 SV=1 |
| CCG025237.1 | 1769 | 451  | 3458 | 10.9549747 | 68.33562526 | 2.641051734 | Up | 1.51E-12 | 3.65E-12 | AAEL003005-PA OS=Aedes aegypti GN=AAEL003005 PE=4 SV=1                                          |
| CCG003927.2 | 3130 | 179  | 3468 | 2.4573746  | 38.73332391 | 3.97838561  | Up | 0        | 0        | AAEL012224-PA OS=Aedes aegypti GN=AAEL012224 PE=4 SV=1                                          |
| CCG006692.2 | 2345 | 943  | 3468 | 17.2795137 | 51.69948991 | 1.581087426 | Up | 1.51E-12 | 3.64E-12 | AAEL005484-PA OS=Aedes aegypti GN=AAEL005484 PE=4 SV=1                                          |
| CCG000728.1 | 582  | 881  | 3469 | 65.0452512 | 208.368148  | 1.67961912  | Up | 4.13E-13 | 1.09E-12 | AAEL011090-PA OS=Aedes aegypti GN=AAEL011090 PE=2 SV=1                                          |
| CCG014335.1 | 3339 | 1104 | 3471 | 14.2074235 | 36.34027514 | 1.354924397 | Up | 4.57E-12 | 1.05E-11 | Pip1 interacting protein, pimt OS=Culex quinquefasciatus GN=CpipJ_CPIJ006162 PE=4 SV=1          |
| CCG018337.1 | 3327 | 1104 | 3474 | 14.2586676 | 36.50287151 | 1.356170786 | Up | 4.57E-12 | 1.05E-11 | Artemisinin-resistance protein OS=Culex quinquefasciatus GN=CpipJ_CPIJ002829 PE=4 SV=1          |



|             |      |       |      |            |             |              |      |          |          |                                                                                                 |
|-------------|------|-------|------|------------|-------------|--------------|------|----------|----------|-------------------------------------------------------------------------------------------------|
| CCG002226.1 | 1299 | 777   | 3478 | 25.702451  | 93.59883496 | 1.864584633  | Up   | 0        | 0        | Discs overgrown protein kinase<br>OS=Culex quinquefasciatus<br>GN=CpipJ_CPIJ003503 PE=3<br>SV=1 |
| CCG004101.1 | 3093 | 653   | 3487 | 9.0718515  | 39.41141646 | 2.119144671  | Up   | 5.96E-13 | 1.53E-12 | AAEL003108-PA OS=Aedes<br>aegypti GN=AAEL003108 PE=4<br>SV=1                                    |
| CCG024803.1 | 2972 | 709   | 3494 | 10.2508553 | 41.09832404 | 2.003335279  | Up   | 2.32E-12 | 5.49E-12 | AAEL013213-PA OS=Aedes<br>aegypti GN=AAEL013213 PE=4<br>SV=1                                    |
| CCG023657.1 | 3136 | 478   | 3496 | 6.54959603 | 38.97134426 | 2.572935865  | Up   | 5.04E-13 | 1.31E-12 | AAEL002290-PA OS=Aedes<br>aegypti GN=AAEL002290 PE=4<br>SV=1                                    |
| CCG018859.3 | 3744 | 690   | 3502 | 7.91910173 | 32.6986873  | 2.045824021  | Up   | 8.73E-13 | 2.18E-12 | AAEL011956-PA OS=Aedes<br>aegypti GN=AAEL011956 PE=4<br>SV=1                                    |
| CCG026987.1 | 2553 | 1372  | 3502 | 23.092235  | 47.95295153 | 1.054211806  | Up   | 6.08E-12 | 1.37E-11 | AAEL010359-PA OS=Aedes<br>aegypti GN=AAEL010359 PE=3<br>SV=1                                    |
| CCG016165.1 | 1590 | 1414  | 3502 | 38.2133363 | 76.99615425 | 1.010710167  | Up   | 0        | 0        | AAEL012026-PA OS=Aedes<br>aegypti GN=AAEL012026 PE=2<br>SV=1                                    |
| CCG028305.1 | 2797 | 12615 | 3507 | 193.801645 | 43.83220473 | -2.144517667 | Down | 0        | 0        | AAEL003606-PA OS=Aedes<br>aegypti GN=AAEL003606 PE=4<br>SV=1                                    |
| CCG003260.1 | 1068 | 18226 | 3512 | 733.301857 | 114.9564307 | -2.673320019 | Down | 0        | 0        | AAEL001490-PA OS=Aedes<br>aegypti GN=AAEL001490 PE=3<br>SV=1                                    |
| CCG021671.1 | 3108 | 141   | 3526 | 1.94939916 | 39.65987255 | 4.346578611  | Up   | 0        | 0        | AAEL013142-PA OS=Aedes<br>aegypti GN=AAEL013142 PE=4<br>SV=1                                    |
| CCG019517.1 | 2265 | 461   | 3530 | 8.7457164  | 54.48243576 | 2.639142732  | Up   | 1.29E-13 | 3.95E-13 | Mystery 43A OS=Culex<br>quinquefasciatus<br>GN=CpipJ_CPIJ001550 PE=4<br>SV=1                    |
| CCG003002.1 | 6105 | 622   | 3530 | 4.37791563 | 20.21338526 | 2.206994902  | Up   | 0        | 0        | AAEL007312-PA OS=Aedes<br>aegypti GN=AAEL007312 PE=4<br>SV=1                                    |
| CCG027862.1 | 1341 | 677   | 3531 | 21.6931472 | 92.04897486 | 2.085162286  | Up   | 4.03E-13 | 1.07E-12 | Uncharacterized protein<br>OS=Anopheles darlingi<br>GN=AND_00971 PE=4 SV=1                      |
| CCG005253.1 | 3782 | 1296  | 3533 | 14.7246896 | 32.65668742 | 1.149141235  | Up   | 5.25E-12 | 1.19E-11 | AAEL012750-PA OS=Aedes<br>aegypti GN=AAEL012750 PE=4<br>SV=1                                    |
| CCG002411.1 | 1669 | 1215  | 3535 | 31.2811429 | 74.04284505 | 1.243067105  | Up   | 7.68E-13 | 1.93E-12 | Signal transducer and activator of<br>transcription OS=Aedes albopictus<br>GN=STAT PE=2 SV=1    |

|             |       |       |      |            |             |              |      |          |          |                                                                                       |
|-------------|-------|-------|------|------------|-------------|--------------|------|----------|----------|---------------------------------------------------------------------------------------|
| CCG005069.1 | 1512  | 577   | 3536 | 16.3978418 | 81.7542769  | 2.317788255  | Up   | 4.04E-13 | 1.07E-12 | AAEL011632-PA OS=Aedes aegypti GN=AAEL011632 PE=4 SV=1                                |
| CCG006450.1 | 1226  | 34449 | 3536 | 1207.39346 | 100.8258293 | -3.581958721 | Down | 0        | 0        | AAEL005170-PA OS=Aedes aegypti GN=AAEL005170 PE=4 SV=1                                |
| CCG001585.1 | 12067 | 1111  | 3541 | 3.95619252 | 10.25832917 | 1.374611231  | Up   | 5.82E-12 | 1.32E-11 | AAEL008134-PA OS=Aedes aegypti GN=AAEL008134 PE=3 SV=1                                |
| CCG010942.2 | 1773  | 1229  | 3546 | 29.7855634 | 69.91655354 | 1.231020824  | Up   | 3.41E-13 | 9.25E-13 | AAEL002983-PA (Fragment) OS=Aedes aegypti GN=AAEL002983 PE=4 SV=1                     |
| CCG025107.1 | 1422  | 18843 | 3546 | 569.39431  | 87.17443701 | -2.70745103  | Down | 0        | 0        | AAEL005610-PA OS=Aedes aegypti GN=AAEL005610 PE=4 SV=1                                |
| CCG000429.1 | 4512  | 434   | 3547 | 4.13317039 | 27.48160632 | 2.733145586  | Up   | 0        | 0        | AAEL005231-PA OS=Aedes aegypti GN=AAEL005231 PE=4 SV=1                                |
| CCG009126.1 | 616   | 835   | 3555 | 58.2463123 | 201.7478473 | 1.792314661  | Up   | 0        | 0        | AAEL009772-PA OS=Aedes aegypti GN=AAEL009772 PE=2 SV=1                                |
| CCG021405.1 | 2340  | 312   | 3559 | 5.72929795 | 53.16944745 | 3.214167202  | Up   | 9.28E-14 | 2.93E-13 | AAEL002771-PA (Fragment) OS=Aedes aegypti GN=AAEL002771 PE=4 SV=1                     |
| CCG016737.1 | 6147  | 1367  | 3563 | 9.55582027 | 20.2629478  | 1.084392444  | Up   | 1.86E-12 | 4.45E-12 | AAEL002392-PA OS=Aedes aegypti GN=AAEL002392 PE=4 SV=1                                |
| CCG013584.1 | 4875  | 1369  | 3566 | 12.0667829 | 25.57153128 | 1.08349746   | Up   | 3.82E-12 | 8.84E-12 | Putative uncharacterized protein OS=Tribolium castaneum GN=TcasGA2_TC010545 PE=4 SV=1 |
| CCG011382.1 | 1110  | 1028  | 3568 | 39.7953939 | 112.3703888 | 1.497588555  | Up   | 1.50E-12 | 3.63E-12 | AAEL003326-PA OS=Aedes aegypti GN=AAEL003326 PE=3 SV=1                                |
| CCG027364.1 | 2286  | 1020  | 3570 | 19.1728475 | 54.59363433 | 1.509668126  | Up   | 1.22E-12 | 2.96E-12 | AAEL005277-PA OS=Aedes aegypti GN=AAEL005277 PE=4 SV=1                                |
| CCG011237.1 | 2850  | 15495 | 3573 | 233.619662 | 43.82663962 | -2.414281732 | Down | 0        | 0        | AAEL012552-PA OS=Aedes aegypti GN=AAEL012552 PE=4 SV=1                                |
| CCG026280.1 | 925   | 294   | 3575 | 13.6574075 | 135.1090156 | 3.306368386  | Up   | 0        | 0        | 60S acidic ribosomal protein P2 OS=Aedes aegypti GN=AAEL014583 PE=4 SV=1              |
| CCG009221.1 | 2197  | 0     | 3576 | 0.001      | 56.90068172 | 15.79615832  | Up   | 4.44E-16 | 1.64E-15 | AAEL002671-PA OS=Aedes aegypti GN=AAEL002671 PE=4 SV=1                                |

|             |       |       |      |            |             |              |      |          |          |                                                                                    |
|-------------|-------|-------|------|------------|-------------|--------------|------|----------|----------|------------------------------------------------------------------------------------|
| CCG013784.1 | 2485  | 1075  | 3579 | 18.588517  | 50.34835918 | 1.437533088  | Up   | 4.26E-12 | 9.83E-12 | AAEL004167-PA OS=Aedes aegypti GN=AAEL004167 PE=4 SV=1                             |
| CCG027285.1 | 3475  | 1296  | 3580 | 16.0255471 | 36.01457003 | 1.168207073  | Up   | 5.25E-12 | 1.19E-11 | AAEL000981-PA OS=Aedes aegypti GN=AAEL000981 PE=4 SV=1                             |
| CCG009883.1 | 840   | 911   | 3582 | 46.6017003 | 149.0720802 | 1.677555582  | Up   | 0        | 0        | AAEL010954-PA OS=Aedes aegypti GN=AAEL010954 PE=4 SV=1                             |
| CCG019438.1 | 2748  | 1270  | 3587 | 19.8586474 | 45.63149155 | 1.200262452  | Up   | 2.33E-12 | 5.50E-12 | AAEL003785-PA OS=Aedes aegypti GN=AAEL003785 PE=4 SV=1                             |
| CCG000670.1 | 1143  | 672   | 3591 | 25.2630461 | 109.8295467 | 2.120165719  | Up   | 0        | 0        | AAEL009092-PB OS=Aedes aegypti GN=AAEL009092 PE=3 SV=1                             |
| CCG015783.1 | 3852  | 703   | 3596 | 7.84208812 | 32.63498527 | 2.05710963   | Up   | 2.48E-13 | 6.98E-13 | AAEL007690-PA OS=Aedes aegypti GN=AAEL007690 PE=4 SV=1                             |
| CCG002742.1 | 4000  | 447   | 3598 | 4.80186784 | 31.44496996 | 2.711161654  | Up   | 3.44E-13 | 9.29E-13 | AAEL001036-PA OS=Aedes aegypti GN=AAEL001036 PE=4 SV=1                             |
| CCG024776.1 | 836   | 36196 | 3599 | 1860.44559 | 150.4962178 | -3.627849063 | Down | 0        | 0        | Myosin light chain 2 OS=Culex quinquefasciatus GN=CpipJ_CPIJ017123 PE=4 SV=1       |
| CCG013821.1 | 4038  | 445   | 3602 | 4.73539671 | 31.18368324 | 2.719234144  | Up   | 0        | 0        | AAEL011215-PA OS=Aedes aegypti GN=AAEL011215 PE=4 SV=1                             |
| CCG025131.2 | 15094 | 1428  | 3602 | 4.06524321 | 8.342368685 | 1.037115406  | Up   | 1.05E-12 | 2.59E-12 | AAEL014749-PB OS=Aedes aegypti GN=AAEL014749 PE=4 SV=1                             |
| CCG005477.1 | 2628  | 391   | 3603 | 6.39313784 | 47.92795708 | 2.906271343  | Up   | 9.02E-13 | 2.25E-12 | AAEL004493-PA OS=Aedes aegypti GN=AAEL004493 PE=4 SV=1                             |
| CCG010364.1 | 1851  | 8316  | 3603 | 193.050412 | 68.04682399 | -1.504377903 | Down | 0        | 0        | Actin filament light chain OS=Culex quinquefasciatus GN=CpipJ_CPIJ010990 PE=4 SV=1 |
| CCG010417.2 | 3062  | 1369  | 3608 | 19.2114849 | 41.19185584 | 1.100390096  | Up   | 3.82E-12 | 8.84E-12 | AAEL004936-PA OS=Aedes aegypti GN=AAEL004936 PE=4 SV=1                             |
| CCG018611.1 | 18286 | 871   | 3616 | 2.04673733 | 6.912891218 | 1.755963258  | Up   | 0        | 0        | AAEL004320-PA OS=Aedes aegypti GN=AAEL004320 PE=4 SV=1                             |
| CCG015651.1 | 1776  | 382   | 3620 | 9.24236409 | 71.25504612 | 2.946658358  | Up   | 6.17E-13 | 1.58E-12 | AGAP001945-PA OS=Anopheles gambiae GN=AgaP_AGAP001945 PE=4 SV=4                    |
| CCG000411.1 | 17281 | 641   | 3623 | 1.59386609 | 7.329080305 | 2.201101748  | Up   | 0        | 0        | AAEL007560-PA OS=Aedes aegypti GN=AAEL007560 PE=4 SV=1                             |

|             |       |      |      |            |             |              |      |          |          |                                                                                          |
|-------------|-------|------|------|------------|-------------|--------------|------|----------|----------|------------------------------------------------------------------------------------------|
| CCG013682.1 | 1879  | 194  | 3634 | 4.43647074 | 67.60956774 | 3.929743066  | Up   | 5.97E-13 | 1.53E-12 | AAEL013775-PA OS=Aedes aegypti GN=AAEL013775 PE=4 SV=1                                   |
| CCG005033.1 | 3045  | 398  | 3635 | 5.61640538 | 41.73180166 | 2.893428232  | Up   | 7.64E-13 | 1.92E-12 | AAEL011267-PA OS=Aedes aegypti GN=AAEL011267 PE=4 SV=1                                   |
| CCG014352.1 | 5589  | 516  | 3636 | 3.96714673 | 22.74258263 | 2.519222433  | Up   | 9.75E-14 | 3.07E-13 | AAEL012442-PB (Fragment) OS=Aedes aegypti GN=AAEL012442 PE=4 SV=1                        |
| CCG021863.1 | 3045  | 25   | 3638 | 0.35278928 | 41.76624332 | 6.887386842  | Up   | 9.32E-12 | 2.08E-11 | Transcription factor btd OS=Culex quinquefasciatus GN=CpipJ_CPIJ018448 PE=4 SV=1         |
| CCG006243.1 | 2989  | 303  | 3640 | 4.35591488 | 42.57214033 | 3.288861955  | Up   | 1.37E-13 | 4.14E-13 | AAEL003908-PA OS=Aedes aegypti GN=AAEL003908 PE=4 SV=1                                   |
| CCG011818.1 | 7472  | 8617 | 3641 | 49.5543634 | 17.03467421 | -1.540537739 | Down | 0        | 0        | Putative uncharacterized protein OS=Culex quinquefasciatus GN=CpipJ_CPIJ001569 PE=4 SV=1 |
| CCG027327.1 | 8084  | 634  | 3646 | 3.36996682 | 15.76668445 | 2.22607302   | Up   | 3.52E-13 | 9.51E-13 | AAEL005215-PA OS=Aedes aegypti GN=AAEL005215 PE=4 SV=1                                   |
| CCG003981.1 | 3177  | 410  | 3650 | 5.54535448 | 40.16295569 | 2.856513853  | Up   | 1.25E-12 | 3.04E-12 | AAEL011145-PA (Fragment) OS=Aedes aegypti GN=AAEL011145 PE=4 SV=1                        |
| CCG011935.1 | 6768  | 595  | 3654 | 3.77762886 | 18.87375049 | 2.320828264  | Up   | 7.20E-13 | 1.81E-12 | AAEL000079-PA OS=Aedes aegypti GN=AAEL000079 PE=4 SV=1                                   |
| CCG027144.1 | 12297 | 650  | 3664 | 2.27131231 | 10.41612801 | 2.197221084  | Up   | 0        | 0        | AAEL008683-PA OS=Aedes aegypti GN=AAEL008683 PE=4 SV=1                                   |
| CCG006404.1 | 4735  | 686  | 3665 | 6.22539344 | 27.05851835 | 2.119845921  | Up   | 2.38E-13 | 6.73E-13 | AAEL013609-PA (Fragment) OS=Aedes aegypti GN=AAEL013609 PE=4 SV=1                        |
| CCG019651.1 | 950   | 430  | 3666 | 19.4494588 | 134.9021502 | 2.794111425  | Up   | 6.22E-13 | 1.59E-12 | -                                                                                        |
| CCG028144.2 | 3933  | 706  | 3668 | 7.71335689 | 32.60283733 | 2.079566754  | Up   | 0        | 0        | AAEL000682-PA OS=Aedes aegypti GN=AAEL000682 PE=4 SV=1                                   |
| CCG021692.1 | 3607  | 294  | 3685 | 3.5023848  | 35.71423618 | 3.350089763  | Up   | 0        | 0        | AAEL004286-PA OS=Aedes aegypti GN=AAEL004286 PE=4 SV=1                                   |
| CCG015949.1 | 4592  | 1365 | 3687 | 12.7730156 | 28.06863381 | 1.135859669  | Up   | 1.68E-12 | 4.04E-12 | AAEL005706-PA OS=Aedes aegypti GN=AAEL005706 PE=4 SV=1                                   |

|             |       |      |      |            |             |             |    |          |          |                                                                                          |
|-------------|-------|------|------|------------|-------------|-------------|----|----------|----------|------------------------------------------------------------------------------------------|
| CCG019660.1 | 3417  | 525  | 3689 | 6.60202244 | 37.74102517 | 2.515153665 | Up | 2.05E-13 | 5.90E-13 | AAEL002407-PA OS=Aedes aegypti GN=AAEL002407 PE=4 SV=1                                   |
| CCG024832.1 | 1374  | 416  | 3696 | 13.0097595 | 94.03623796 | 2.853622527 | Up | 1.20E-14 | 4.28E-14 | AAEL005890-PA OS=Aedes aegypti GN=AAEL005890 PE=4 SV=1                                   |
| CCG011018.1 | 2043  | 252  | 3697 | 5.30023158 | 63.26027862 | 3.577172609 | Up | 5.42E-14 | 1.81E-13 | AAEL012519-PA OS=Aedes aegypti GN=AAEL012519 PE=4 SV=1                                   |
| CCG016301.1 | 2170  | 52   | 3698 | 1.02968949 | 59.57405876 | 5.854402995 | Up | 0        | 0        | AAEL000584-PA OS=Aedes aegypti GN=AAEL000584 PE=4 SV=1                                   |
| CCG026142.1 | 2136  | 253  | 3700 | 5.08957999 | 60.55506744 | 3.572629185 | Up | 3.13E-13 | 8.62E-13 | AAEL001495-PA OS=Aedes aegypti GN=AAEL001495 PE=4 SV=1                                   |
| CCG022091.1 | 5421  | 150  | 3702 | 1.18897993 | 23.8730014  | 4.327583693 | Up | 0        | 0        | AAEL008709-PA OS=Aedes aegypti GN=AAEL008709 PE=4 SV=1                                   |
| CCG014572.1 | 2613  | 647  | 3703 | 10.6396549 | 49.54094868 | 2.219170136 | Up | 0        | 0        | AAEL011089-PA OS=Aedes aegypti GN=AAEL011089 PE=4 SV=1                                   |
| CCG006028.1 | 2953  | 680  | 3712 | 9.89482544 | 43.94348912 | 2.150903263 | Up | 4.12E-13 | 1.09E-12 | Heat shock 70 Cb OS=Aedes aegypti GN=Hsp70Cb PE=3 SV=1                                   |
| CCG017851.1 | 1617  | 1293 | 3722 | 34.3598434 | 80.46673231 | 1.227668984 | Up | 5.13E-12 | 1.17E-11 | AAEL008370-PA (Fragment) OS=Aedes aegypti GN=SCRB17 PE=4 SV=2                            |
| CCG010346.1 | 537   | 23   | 3723 | 1.84041694 | 242.3643658 | 7.041001149 | Up | 4.01E-11 | 8.68E-11 | Galactose-specific C-type lectin OS=Culex quinquefasciatus GN=CpipJ_CPIJ012307 PE=4 SV=1 |
| CCG000354.1 | 5258  | 405  | 3726 | 3.30976465 | 24.77263965 | 2.903947065 | Up | 2.34E-13 | 6.64E-13 | AAEL007360-PA OS=Aedes aegypti GN=AAEL007360 PE=4 SV=1                                   |
| CCG004592.1 | 14063 | 1222 | 3731 | 3.73384169 | 9.274644858 | 1.312631279 | Up | 6.16E-12 | 1.39E-11 | Uncharacterized protein OS=Anopheles darlingi GN=AND_12310 PE=4 SV=1                     |
| CCG002166.1 | 3993  | 1469 | 3732 | 15.8082996 | 32.67325042 | 1.047427794 | Up | 3.08E-12 | 7.21E-12 | AAEL005847-PA OS=Aedes aegypti GN=AAEL005847 PE=4 SV=1                                   |
| CCG021696.1 | 2922  | 59   | 3737 | 0.86762982 | 44.7087886  | 5.687335003 | Up | 0        | 0        | AAEL009395-PA OS=Aedes aegypti GN=AAEL009395 PE=4 SV=1                                   |
| CCG011990.4 | 3003  | 1035 | 3738 | 14.8097487 | 43.51449836 | 1.554949005 | Up | 4.31E-12 | 9.93E-12 | AAEL012778-PA OS=Aedes aegypti GN=AAEL012778 PE=4 SV=1                                   |
| CCG015634.1 | 1158  | 37   | 3753 | 1.37295352 | 113.2974203 | 6.366688413 | Up | 5.17E-14 | 1.74E-13 | AAEL011532-PA OS=Aedes aegypti GN=AAEL011532 PE=4 SV=1                                   |

|             |       |       |      |            |             |             |      |          |          |                                                                                                    |
|-------------|-------|-------|------|------------|-------------|-------------|------|----------|----------|----------------------------------------------------------------------------------------------------|
| CCG004950.1 | 2059  | 375   | 3758 | 7.82595944 | 63.80437305 | 3.02731577  | Up   | 0        | 0        | Suppressor of defective silencing<br>OS=Culex quinquefasciatus<br>GN=CpipJ_CPIJ016520 PE=4<br>SV_1 |
| CCG023005.1 | 1981  | 252   | 3760 | 5.46611465 | 66.35190341 | 3.601550227 | Up   | 5.42E-14 | 1.81E-13 | AAEL011341-PA OS=Aedes<br>aegypti GN=AAEL011341 PE=3<br>SV_1                                       |
| CCG018563.1 | 2393  | 570   | 3765 | 10.2351645 | 55.0012169  | 2.425929244 | Up   | 7.69E-13 | 1.93E-12 | AAEL009612-PA OS=Aedes<br>aegypti GN=AAEL009612 PE=4<br>SV_1                                       |
| CCG024254.1 | 2971  | 660   | 3765 | 9.5456159  | 44.30087918 | 2.214425139 | Up   | 0        | 0        | AAEL008079-PA OS=Aedes<br>aegypti GN=AAEL008079 PE=3<br>SV_1                                       |
| CCG012703.2 | 5472  | 15517 | 3766 | 121.849666 | 24.05936958 | -2.34043155 | Down | 0        | 0        | Coagogen alpha-z (rv) chain<br>OS=Culex quinquefasciatus<br>GN=CpipJ_CPIJ005295 PE=4<br>SV_1       |
| CCG026893.1 | 528   | 331   | 3771 | 26.9374662 | 249.6736017 | 3.212357232 | Up   | 0        | 0        | Putative uncharacterized protein<br>OS=Culex quinquefasciatus<br>GN=CpipJ_CPIJ005778 PE=4<br>SV_1  |
| CCG010064.1 | 5128  | 771   | 3772 | 6.46054317 | 25.71423947 | 1.992840115 | Up   | 0        | 0        | AAEL006499-PA OS=Aedes<br>aegypti GN=AAEL006499 PE=4<br>SV_1                                       |
| CCG016613.1 | 3568  | 1467  | 3773 | 17.6672087 | 36.96681005 | 1.065156433 | Up   | 6.83E-12 | 1.53E-11 | AAEL006020-PA OS=Aedes<br>aegypti GN=AAEL006020 PE=4<br>SV_1                                       |
| CCG019742.1 | 1260  | 505   | 3777 | 17.2219968 | 104.7915963 | 2.605198695 | Up   | 0        | 0        | AAEL008600-PA OS=Aedes<br>aegypti GN=AAEL008600 PE=3<br>SV_1                                       |
| CCG009454.1 | 5033  | 572   | 3783 | 4.8835065  | 26.27601054 | 2.427756928 | Up   | 0        | 0        | AAEL006050-PA OS=Aedes<br>aegypti GN=AAEL006050 PE=4<br>SV_1                                       |
| CCG009687.2 | 3218  | 1502  | 3788 | 20.0561036 | 41.15038919 | 1.036864722 | Up   | 5.54E-12 | 1.25E-11 | AAEL001549-PA (Fragment)<br>OS=Aedes aegypti<br>GN=AAEL001549 PE=4 SV=1                            |
| CCG000952.2 | 4583  | 952   | 3797 | 8.92585367 | 28.96281407 | 1.698139724 | Up   | 4.77E-13 | 1.24E-12 | AAEL008171-PA OS=Aedes<br>aegypti GN=AAEL008171 PE=4<br>SV_1                                       |
| CCG021468.1 | 35208 | 1487  | 3800 | 1.81481468 | 3.773047368 | 1.055907975 | Up   | 9.11E-12 | 2.04E-11 | AAEL005822-PA OS=Aedes<br>aegypti GN=AAEL005822 PE=3<br>SV_1                                       |
| CCG022510.1 | 2820  | 906   | 3802 | 13.8051701 | 47.13169088 | 1.77148878  | Up   | 0        | 0        | AAEL013567-PA (Fragment)<br>OS=Aedes aegypti<br>GN=AAEL013567 PE=3 SV=1                            |
| CCG023266.1 | 6906  | 419   | 3808 | 2.60705456 | 19.27615377 | 2.886324533 | Up   | 0        | 0        | AAEL010978-PA OS=Aedes<br>aegypti GN=AAEL010978 PE=4<br>SV_1                                       |

|             |       |       |      |            |             |             |      |          |          |                                                                                                       |
|-------------|-------|-------|------|------------|-------------|-------------|------|----------|----------|-------------------------------------------------------------------------------------------------------|
| CCG024872.1 | 5408  | 845   | 3808 | 6.71402103 | 24.61559134 | 1.874323436 | Up   | 0        | 0        | AGAP001731-PA (Fragment)<br>OS=Anopheles gambiae<br>GN=AgaP_AGAP001731 PE=4<br>SV=5                   |
| CCG020887.1 | 1491  | 498   | 3811 | 14.3520643 | 89.35344921 | 2.638265165 | Up   | 3.42E-13 | 9.27E-13 | Goodpasture antigen-binding<br>protein OS=Culex<br>quinquefasciatus<br>GN=Cq21.6P1.00098 PE=4<br>SV=1 |
| CCG012802.1 | 11196 | 719   | 3814 | 2.75948903 | 11.90879489 | 2.109554372 | Up   | 8.56E-13 | 2.14E-12 | AAEL002788-PA OS=Aedes<br>aegypti GN=AAEL002788 PE=4<br>SV=1                                          |
| CCG007705.1 | 2257  | 933   | 3817 | 17.7628544 | 59.12084291 | 1.734803404 | Up   | 7.48E-13 | 1.88E-12 | Uncharacterized protein<br>OS=Anopheles darlingi<br>GN=AND_09750 PE=4 SV=1                            |
| CCG016859.1 | 2670  | 833   | 3819 | 13.4059135 | 50.00211947 | 1.899119723 | Up   | 1.25E-12 | 3.05E-12 | AAEL003646-PA OS=Aedes<br>aegypti GN=AAEL003646 PE=4<br>SV=1                                          |
| CCG018613.1 | 2052  | 25962 | 3821 | 543.655093 | 65.09530972 | -3.06206616 | Down | 0        | 0        | AAEL010602-PA OS=Aedes<br>aegypti GN=AAEL010602 PE=4<br>SV=1                                          |
| CCG005426.1 | 903   | 186   | 3826 | 8.85090879 | 148.1177928 | 4.064775551 | Up   | 6.43E-13 | 1.64E-12 | AAEL013628-PA OS=Aedes<br>aegypti GN=AAEL013628 PE=3<br>SV=1                                          |
| CCG013722.1 | 4749  | 119   | 3828 | 1.07673161 | 28.1786236  | 4.709870555 | Up   | 0        | 0        | DNA polymerase OS=Aedes<br>aegypti GN=AAEL008247 PE=3<br>SV=1                                         |
| CCG022472.1 | 3153  | 739   | 3829 | 10.0712445 | 42.45329583 | 2.075634595 | Up   | 0        | 0        | AAEL011111-PA (Fragment)<br>OS=Aedes aegypti<br>GN=AAEL011111 PE=4 SV=1                               |
| CCG016914.2 | 2388  | 834   | 3829 | 15.0070179 | 56.05328382 | 1.901161575 | Up   | 4.58E-13 | 1.20E-12 | AAEL011745-PA OS=Aedes<br>aegypti GN=AAEL011745 PE=4<br>SV=1                                          |
| CCG016666.1 | 13899 | 599   | 3835 | 1.85185057 | 9.645657344 | 2.380911873 | Up   | 3.99E-13 | 1.06E-12 | AAEL000416-PA OS=Aedes<br>aegypti GN=AAEL000416 PE=4<br>SV=1                                          |
| CCG019684.1 | 2105  | 874   | 3839 | 17.8411155 | 63.75526106 | 1.837338579 | Up   | 0        | 0        | AAEL012746-PA OS=Aedes<br>aegypti GN=AAEL012746 PE=3<br>SV=1                                          |
| CCG001777.1 | 884   | 600   | 3843 | 29.1649782 | 151.9735946 | 2.381511774 | Up   | 0        | 0        | -                                                                                                     |
| CCG010584.1 | 1227  | 27    | 3846 | 0.94554428 | 109.5758211 | 6.856568749 | Up   | 2.28E-12 | 5.41E-12 | AAEL007584-PA OS=Aedes<br>aegypti GN=AAEL007584 PE=4<br>SV=1                                          |
| CCG024361.1 | 2200  | 895   | 3846 | 17.4808693 | 61.11342385 | 1.805712379 | Up   | 9.98E-13 | 2.47E-12 | -                                                                                                     |

|             |       |      |      |            |             |              |      |          |          |                                                                                                                                |
|-------------|-------|------|------|------------|-------------|--------------|------|----------|----------|--------------------------------------------------------------------------------------------------------------------------------|
| CCG026924.1 | 2729  | 7596 | 3848 | 119.603556 | 49.29257934 | -1.278817903 | Down | 0        | 0        | AAEL005342-PA (Fragment)<br>OS=Aedes aegypti<br>GN=AAEL005342 PE=4 SV=1                                                        |
| CCG011408.1 | 3288  | 386  | 3851 | 5.04450047 | 40.94413742 | 3.020873574  | Up   | 2.52E-13 | 7.09E-13 | AAEL009636-PA OS=Aedes<br>aegypti GN=AAEL009636 PE=4<br>SV=1                                                                   |
| CCG007265.1 | 2128  | 6772 | 3851 | 136.743911 | 63.26331008 | -1.112035646 | Down | 0        | 0        | AAEL012419-PA OS=Aedes<br>aegypti GN=AAEL012419 PE=4<br>SV=1                                                                   |
| CCG017992.1 | 3075  | 966  | 3854 | 13.4987849 | 43.81437355 | 1.698574681  | Up   | 4.38E-13 | 1.15E-12 | AAEL003032-PA (Fragment)<br>OS=Aedes aegypti<br>GN=AAEL003032 PE=4 SV=1                                                        |
| CCG011783.1 | 3702  | 730  | 3855 | 8.47323238 | 36.40306779 | 2.103075695  | Up   | 0        | 0        | AAEL009269-PA OS=Aedes<br>aegypti GN=AAEL009269 PE=4<br>SV=1                                                                   |
| CCG006153.1 | 918   | 147  | 3859 | 6.8807745  | 146.9542375 | 4.416652188  | Up   | 7.02E-14 | 2.29E-13 | AAEL000005-PB OS=Aedes<br>aegypti GN=AAEL000005 PE=4<br>SV=1                                                                   |
| CCG008801.1 | 3717  | 148  | 3868 | 1.71092836 | 36.37842738 | 4.410231918  | Up   | 0        | 0        | AAEL014084-PA OS=Aedes<br>aegypti GN=AAEL014084 PE=3<br>SV=1                                                                   |
| CCG006660.1 | 1485  | 433  | 3872 | 12.5292223 | 91.15046981 | 2.862953226  | Up   | 9.43E-13 | 2.34E-12 | AGAP008118-PA OS=Anopheles<br>gambiae GN=AGAP008118 PE=4<br>SV=4                                                               |
| CCG020338.1 | 3231  | 708  | 3874 | 9.41583785 | 41.91530926 | 2.154315892  | Up   | 9.24E-13 | 2.30E-12 | RNA polymerase II subunit A C-<br>terminal domain phosphatase<br>OS=Culex quinquefasciatus<br>GN=CpipJ_CPIJ004583 PE=4<br>SV=1 |
| CCG014360.1 | 2526  | 101  | 3878 | 1.71810895 | 53.66912008 | 4.965198809  | Up   | 0        | 0        | AAEL010153-PA OS=Aedes<br>aegypti GN=AAEL010153 PE=4<br>SV=1                                                                   |
| CCG026882.1 | 1863  | 1441 | 3879 | 33.2363862 | 72.78752313 | 1.130927644  | Up   | 1.07E-12 | 2.62E-12 | AAEL006021-PA OS=Aedes<br>aegypti GN=AAEL006021 PE=4<br>SV=1                                                                   |
| CCG023505.2 | 2567  | 935  | 3881 | 15.6512278 | 52.8527745  | 1.755703367  | Up   | 1.31E-12 | 3.18E-12 | AAEL005481-PA OS=Aedes<br>aegypti GN=AAEL005481 PE=4<br>SV=1                                                                   |
| CCG014983.1 | 1437  | 1260 | 3887 | 37.6770116 | 94.56007085 | 1.327546578  | Up   | 1.31E-12 | 3.18E-12 | AAEL006956-PA OS=Aedes<br>aegypti GN=AAEL006956 PE=4<br>SV=1                                                                   |
| CCG027111.1 | 23944 | 1450 | 3887 | 2.60215984 | 5.67502597  | 1.124917411  | Up   | 1.87E-12 | 4.49E-12 | AAEL008952-PA OS=Aedes<br>aegypti GN=AAEL008952 PE=4<br>SV=1                                                                   |
| CCG005143.1 | 663   | 1218 | 3888 | 78.9398744 | 205.0041932 | 1.37682729   | Up   | 3.82E-12 | 8.85E-12 | AAEL000951-PA OS=Aedes<br>aegypti GN=AAEL000951 PE=3<br>SV=1                                                                   |



|             |       |       |      |            |             |              |      |          |          |                                                                                                     |
|-------------|-------|-------|------|------------|-------------|--------------|------|----------|----------|-----------------------------------------------------------------------------------------------------|
| CCG004636.1 | 3809  | 1095  | 3889 | 12.3528116 | 35.69250154 | 1.530781569  | Up   | 4.38E-12 | 1.01E-11 | AAEL004289-PA OS=Aedes aegypti GN=AAEL004289 PE=4 SV=1                                              |
| CCG020978.1 | 4407  | 598   | 3890 | 5.83070145 | 30.85720369 | 2.403865969  | Up   | 0        | 0        | Tyrosine-protein kinase receptor OS=Anopheles gambiae GN=INR PE=3 SV=3                              |
| CCG014228.2 | 2181  | 32039 | 3892 | 631.227569 | 62.38313306 | -3.3389323   | Down | 0        | 0        | AAEL003873-PA OS=Aedes aegypti GN=AAEL003873 PE=3 SV=1                                              |
| CCG000030.1 | 4224  | 537   | 3894 | 5.46277166 | 32.2271614  | 2.560572095  | Up   | 3.67E-13 | 9.84E-13 | AAEL013724-PA (Fragment) OS=Aedes aegypti GN=AAEL013724 PE=4 SV=1                                   |
| CCG015413.1 | 5634  | 554   | 3897 | 4.22528097 | 24.1804055  | 2.516719254  | Up   | 9.41E-14 | 2.97E-13 | AAEL013080-PA OS=Aedes aegypti GN=AAEL013080 PE=4 SV=1                                              |
| CCG000730.2 | 3687  | 1424  | 3899 | 16.5958509 | 36.96835398 | 1.155468212  | Up   | 4.81E-12 | 1.10E-11 | AAEL011092-PA OS=Aedes aegypti GN=AAEL011092 PE=4 SV=1                                              |
| CCG013691.1 | 3201  | 426   | 3900 | 5.71855887 | 42.59208979 | 2.896861992  | Up   | 4.37E-13 | 1.15E-12 | AAEL006559-PA OS=Aedes aegypti GN=AAEL006559 PE=4 SV=1                                              |
| CCG020776.1 | 2697  | 980   | 3906 | 15.6137708 | 50.62922843 | 1.697151499  | Up   | 1.36E-12 | 3.29E-12 | Eukaryotic translation initiation factor 2C 2 OS=Culex quinquefasciatus GN=Cuq1.CPI006128 PE=4 SV=1 |
| CCG009674.1 | 1509  | 712   | 3909 | 20.2746528 | 90.55792174 | 2.159163642  | Up   | 0        | 0        | AAEL002886-PA OS=Aedes aegypti GN=AAEL002886 PE=3 SV=1                                              |
| CCG020520.1 | 2886  | 1346  | 3909 | 20.0406316 | 47.34993205 | 1.240434378  | Up   | 4.85E-12 | 1.10E-11 | AAEL008556-PA OS=Aedes aegypti GN=AAEL008556 PE=4 SV=1                                              |
| CCG015800.2 | 3590  | 624   | 3920 | 7.46883409 | 38.17171168 | 2.353548924  | Up   | 0        | 0        | AAEL007484-PA OS=Aedes aegypti GN=AAEL007484 PE=4 SV=1                                              |
| CCG014117.1 | 10584 | 843   | 3927 | 3.42247603 | 12.97063047 | 1.922136266  | Up   | 2.68E-12 | 6.30E-12 | AAEL009427-PA OS=Aedes aegypti GN=AAEL009427 PE=4 SV=1                                              |
| CCG023025.2 | 5448  | 1181  | 3927 | 9.31484152 | 25.1984495  | 1.435731837  | Up   | 1.60E-12 | 3.86E-12 | AAEL006395-PA OS=Aedes aegypti GN=AAEL006395 PE=4 SV=1                                              |
| CCG008348.1 | 6336  | 870   | 3928 | 5.9002003  | 21.67236603 | 1.877020827  | Up   | 0        | 0        | AAEL007242-PA (Fragment) OS=Aedes aegypti GN=AAEL007242 PE=4 SV=1                                   |
| CCG016370.1 | 1810  | 15559 | 3935 | 369.373536 | 76.00045254 | -2.281000594 | Down | 0        | 0        | GL12416 OS=Drosophila persimilis GN=GL12416 PE=3 SV=1                                               |

|             |      |      |      |            |             |             |    |          |          |                                                                   |
|-------------|------|------|------|------------|-------------|-------------|----|----------|----------|-------------------------------------------------------------------|
| CCG004620.1 | 3381 | 227  | 3938 | 2.88498366 | 40.71744866 | 3.819012112 | Up | 0        | 0        | AAEL000154-PA OS=Aedes aegypti GN=AAEL000154 PE=4 SV=1            |
| CCG010021.1 | 1803 | 269  | 3940 | 6.41090328 | 76.39246283 | 3.574830756 | Up | 0        | 0        | AAEL012265-PA OS=Aedes aegypti GN=AAEL012265 PE=4 SV=1            |
| CCG013047.1 | 4063 | 583  | 3943 | 6.16572859 | 33.92579013 | 2.460039126 | Up | 2.70E-13 | 7.54E-13 | AAEL006062-PA (Fragment) OS=Aedes aegypti GN=AAEL006062 PE=4 SV=1 |
| CCG015631.1 | 3558 | 1171 | 3944 | 14.1420908 | 38.75082732 | 1.45423168  | Up | 3.84E-12 | 8.89E-12 | AAEL007847-PA (Fragment) OS=Aedes aegypti GN=AAEL007847 PE=4 SV=1 |
| CCG017863.3 | 5949 | 1200 | 3954 | 8.66762171 | 23.23500191 | 1.422591669 | Up | 4.83E-13 | 1.26E-12 | AAEL001296-PA OS=Aedes aegypti GN=AAEL001296 PE=4 SV=1            |
| CCG024595.1 | 4383 | 495  | 3956 | 4.85284477 | 31.55257653 | 2.7008552   | Up | 1.42E-13 | 4.26E-13 | AAEL005532-PA (Fragment) OS=Aedes aegypti GN=AAEL005532 PE=4 SV=1 |
| CCG002067.1 | 5451 | 874  | 3956 | 6.88966209 | 25.37056373 | 1.880650445 | Up | 0        | 0        | AAEL008814-PA OS=Aedes aegypti GN=AAEL008814 PE=4 SV=1            |
| CCG022488.2 | 1203 | 183  | 3957 | 6.53654317 | 114.987449  | 4.136804716 | Up | 3.05E-13 | 8.41E-13 | AAEL012183-PA OS=Aedes aegypti GN=AAEL012183 PE=4 SV=1            |
| CCG018981.1 | 2516 | 1061 | 3958 | 18.1203849 | 54.9939823  | 1.60166016  | Up | 3.27E-12 | 7.64E-12 | AAEL010584-PA OS=Aedes aegypti GN=AAEL010584 PE=4 SV=1            |
| CCG010930.1 | 4906 | 1088 | 3958 | 9.52936634 | 28.2031919  | 1.56540626  | Up | 2.82E-12 | 6.61E-12 | AAEL008244-PA (Fragment) OS=Aedes aegypti GN=AAEL008244 PE=4 SV=1 |
| CCG008896.1 | 2927 | 1282 | 3958 | 18.8203621 | 47.27190279 | 1.328688554 | Up | 3.23E-12 | 7.55E-12 | AAEL000802-PA (Fragment) OS=Aedes aegypti GN=AAEL000802 PE=4 SV=1 |
| CCG024011.1 | 2166 | 761  | 3960 | 15.0969382 | 63.91263897 | 2.081845275 | Up | 0        | 0        | AAEL008938-PA OS=Aedes aegypti GN=AAEL008938 PE=4 SV=1            |
| CCG016977.1 | 2025 | 1072 | 3960 | 22.7474348 | 68.36285235 | 1.587508728 | Up | 4.51E-12 | 1.04E-11 | AAEL006589-PA OS=Aedes aegypti GN=AAEL006589 PE=4 SV=1            |
| CCG001159.1 | 3932 | 1199 | 3960 | 13.1029277 | 35.20721669 | 1.425981975 | Up | 4.07E-12 | 9.41E-12 | AAEL008210-PA OS=Aedes aegypti GN=AAEL008210 PE=4 SV=1            |

|             |       |      |      |            |             |              |      |          |          |                                                                                                   |
|-------------|-------|------|------|------------|-------------|--------------|------|----------|----------|---------------------------------------------------------------------------------------------------|
| CCG011598.1 | 6139  | 941  | 3961 | 6.58649947 | 22.55574756 | 1.775911277  | Up   | 0        | 0        | Putative uncharacterized protein<br>OS=Culex quinquefasciatus<br>GN=CpipJ_CPIJ004311 PE=4<br>SV=1 |
| CCG009754.1 | 4368  | 163  | 3965 | 1.60349513 | 31.73295957 | 4.3066902    | Up   | 1.80E-13 | 5.24E-13 | Putative uncharacterized protein<br>OS=Culex quinquefasciatus<br>GN=CpipJ_CPIJ013634 PE=4<br>SV=1 |
| CCG015338.1 | 8340  | 1333 | 3966 | 6.86794439 | 16.62404385 | 1.275321101  | Up   | 4.28E-12 | 9.87E-12 | AAEL002037-PA OS=Aedes<br>aegypti GN=AAEL002037 PE=4<br>SV=1                                      |
| CCG006538.1 | 2922  | 1530 | 3968 | 22.499553  | 47.47243061 | 1.077193577  | Up   | 5.34E-12 | 1.21E-11 | AAEL007817-PA OS=Aedes<br>aegypti GN=AAEL007817 PE=4<br>SV=1                                      |
| CCG013477.1 | 2196  | 318  | 3972 | 6.22239326 | 63.23054433 | 3.345080156  | Up   | 1.20E-13 | 3.69E-13 | AAEL014701-PA OS=Aedes<br>aegypti GN=AAEL014701 PE=4<br>SV=1                                      |
| CCG016115.2 | 2829  | 737  | 3987 | 11.194307  | 49.2678153  | 2.137880285  | Up   | 0        | 0        | AAEL000509-PA OS=Aedes<br>aegypti GN=AAEL000509 PE=4<br>SV=1                                      |
| CCG004495.1 | 1716  | 1076 | 3988 | 26.9437264 | 81.24336117 | 1.592300536  | Up   | 5.36E-12 | 1.21E-11 | AAEL007787-PA OS=Aedes<br>aegypti GN=AAEL007787 PE=4<br>SV=1                                      |
| CCG007420.1 | 9238  | 317  | 3993 | 1.47449728 | 15.11024022 | 3.35723153   | Up   | 2.22E-13 | 6.35E-13 | 2-Cys thioredoxin peroxidase<br>OS=Aedes aegypti GN=TPx PE=2<br>SV=1                              |
| CCG014824.1 | 1468  | 333  | 3994 | 9.74722182 | 95.1112789  | 3.286553454  | Up   | 4.41E-13 | 1.16E-12 | AAEL010248-PA (Fragment)<br>OS=Aedes aegypti<br>GN=AAEL010248 PE=3 SV=1                           |
| CCG025015.2 | 4651  | 8188 | 3996 | 75.6474279 | 30.03510513 | -1.332641315 | Down | 0        | 0        | AAEL007651-PA OS=Aedes<br>aegypti GN=AAEL007651 PE=4<br>SV=1                                      |
| CCG023516.4 | 27883 | 1126 | 3999 | 1.73524804 | 5.013741305 | 1.530745658  | Up   | 5.84E-12 | 1.32E-11 | AAEL007417-PA OS=Aedes<br>aegypti GN=AAEL007417 PE=4<br>SV=1                                      |
| CCG026840.1 | 1523  | 447  | 4001 | 12.611603  | 91.83720641 | 2.864327096  | Up   | 3.44E-13 | 9.29E-13 | AAEL003664-PA OS=Aedes<br>aegypti GN=AAEL003664 PE=4<br>SV=1                                      |
| CCG003944.1 | 1095  | 6865 | 4006 | 269.394729 | 127.8930199 | -1.074784095 | Down | 0        | 0        | AAEL015665-PA OS=Aedes<br>aegypti GN=AAEL015665 PE=4<br>SV=1                                      |
| CCG021140.1 | 902   | 1604 | 4008 | 76.4118119 | 155.3356689 | 1.023521571  | Up   | 6.44E-12 | 1.45E-11 | AAEL004450-PA OS=Aedes<br>aegypti GN=AAEL004450 PE=3<br>SV=1                                      |
| CCG024735.1 | 1770  | 7    | 4012 | 0.1699368  | 79.23876068 | 8.865064172  | Up   | 4.31E-06 | 7.70E-06 | AAEL003404-PA OS=Aedes<br>aegypti GN=AAEL003404 PE=4<br>SV=1                                      |

|             |       |       |      |            |             |              |      |           |           |                                                                                                     |
|-------------|-------|-------|------|------------|-------------|--------------|------|-----------|-----------|-----------------------------------------------------------------------------------------------------|
| CCG011646.1 | 1860  | 489   | 4012 | 11.2968818 | 75.4046271  | 2.738728439  | Up   | 1.91E-13  | 5.52E-13  | AAEL004832-PA OS=Aedes aegypti GN=AAEL004832 PE=4 SV=1                                              |
| CCG024915.1 | 1650  | 6759  | 4025 | 176.019658 | 85.27700849 | -1.045507827 | Down | 6.22E-302 | 3.93E-301 | AAEL006776-PA OS=Aedes aegypti GN=AAEL006776 PE=4 SV=1                                              |
| CCG023458.1 | 20124 | 24793 | 4025 | 52.9392084 | 6.992002783 | -2.920558959 | Down | 0         | 0         | AAEL002565-PA OS=Aedes aegypti GN=AAEL002565 PE=4 SV=1                                              |
| CCG010440.1 | 6617  | 622   | 4035 | 4.03916804 | 21.31731098 | 2.399895392  | Up   | 0         | 0         | AAEL007586-PA OS=Aedes aegypti GN=AAEL007586 PE=4 SV=1                                              |
| CCG022225.1 | 804   | 831   | 4035 | 44.4127481 | 175.4435905 | 1.981961495  | Up   | 5.11E-15  | 1.84E-14  | AAEL009244-PA OS=Aedes aegypti GN=AAEL009244 PE=3 SV=1                                              |
| CCG015078.1 | 2202  | 384   | 4057 | 7.49335971 | 64.40768795 | 3.10354829   | Up   | 1.03E-12  | 2.55E-12  | AAEL012441-PA OS=Aedes aegypti GN=AAEL012441 PE=4 SV=1                                              |
| CCG000789.1 | 3171  | 418   | 4060 | 5.66425388 | 44.75894156 | 2.982218084  | Up   | 6.74E-13  | 1.70E-12  | AAEL002903-PA OS=Aedes aegypti GN=AAEL002903 PE=4 SV=1                                              |
| CCG016815.1 | 7001  | 939   | 4062 | 5.76325965 | 20.28289105 | 1.81530638   | Up   | 2.55E-13  | 7.16E-13  | AAEL008662-PA (Fragment) OS=Aedes aegypti GN=AAEL008662 PE=4 SV=1                                   |
| CCG011133.1 | 6672  | 252   | 4069 | 1.6229576  | 21.31972845 | 3.715491845  | Up   | 5.42E-14  | 1.81E-13  | AAEL014706-PA OS=Aedes aegypti GN=AAEL014706 PE=4 SV=1                                              |
| CCG003706.1 | 3034  | 891   | 4069 | 12.6189959 | 46.88372715 | 1.893490147  | Up   | 0         | 0         | AAEL005476-PA OS=Aedes aegypti GN=AAEL005476 PE=4 SV=1                                              |
| CCG013723.1 | 1308  | 1124  | 4075 | 36.9250625 | 108.9105335 | 1.560471228  | Up   | 3.38E-12  | 7.88E-12  | AAEL008257-PA OS=Aedes aegypti GN=AAEL008257 PE=2 SV=1                                              |
| CCG009267.1 | 1620  | 1116  | 4082 | 29.6013727 | 88.08622579 | 1.573252359  | Up   | 3.58E-12  | 8.33E-12  | Transiocon-associated protein subunit alpha OS=Culex quinquefasciatus GN=CpipJ_CPIJ018234 PE=4 SV=1 |
| CCG021799.1 | 5775  | 914   | 4083 | 6.80075107 | 24.71595568 | 1.861676701  | Up   | 0         | 0         | AAEL011187-PA OS=Aedes aegypti GN=AAEL011187 PE=4 SV=1                                              |
| CCG010962.1 | 2467  | 1366  | 4085 | 23.792727  | 57.88591837 | 1.282691799  | Up   | 2.64E-12  | 6.21E-12  | Putative uncharacterized protein OS=Tribolium castaneum GN=TcasGA2_TC003691 PE=4 SV=1               |

|             |       |       |      |            |             |              |      |          |          |                                                                                             |
|-------------|-------|-------|------|------------|-------------|--------------|------|----------|----------|---------------------------------------------------------------------------------------------|
| CCG014372.1 | 1830  | 461   | 4087 | 10.8246162 | 78.07348479 | 2.850516791  | Up   | 1.29E-13 | 3.95E-13 | Alkaline phosphatase OS=Aedes aegypti GN=AAEL009077 PE=3 SV=1                               |
| CCG021143.1 | 2996  | 670   | 4092 | 9.60938658 | 47.74675185 | 2.312886348  | Up   | 8.60E-13 | 2.15E-12 | AAEL004477-PA OS=Aedes aegypti GN=AAEL004477 PE=3 SV=1                                      |
| CCG001107.1 | 2618  | 1047  | 4094 | 17.1846112 | 54.66737399 | 1.669562864  | Up   | 5.84E-12 | 1.32E-11 | AAEL009307-PA (Fragment) OS=Aedes aegypti GN=AAEL009307 PE=4 SV=1                           |
| CCG003786.1 | 14045 | 1473  | 4097 | 4.50654461 | 10.19751228 | 1.178123666  | Up   | 7.16E-12 | 1.60E-11 | GTP-binding protein SARZ OS=Culex quinquefasciatus GN=CpipJ_CPIJ012024 PE=3 SV=1            |
| CCG020553.1 | 1131  | 63552 | 4099 | 2414.51156 | 126.6967078 | -4.252280429 | Down | 0        | 0        | AAEL005961-PA OS=Aedes aegypti GN=AAEL005961 PE=3 SV=1                                      |
| CCG014018.1 | 1373  | 27074 | 4104 | 847.314344 | 104.4929118 | -3.019492212 | Down | 0        | 0        | AAEL004439-PA OS=Aedes aegypti GN=AAEL004439 PE=4 SV=1                                      |
| CCG007520.1 | 22321 | 1578  | 4107 | 3.03777793 | 6.432222692 | 1.082300946  | Up   | 4.46E-13 | 1.17E-12 | AAEL008507-PA OS=Aedes aegypti GN=AAEL008507 PE=3 SV=1                                      |
| CCG014049.1 | 8265  | 1579  | 4107 | 8.20922093 | 17.37128163 | 1.08138698   | Up   | 4.25E-12 | 9.80E-12 | AAEL011479-PA OS=Aedes aegypti GN=AAEL011479 PE=4 SV=1                                      |
| CCG023374.1 | 2601  | 1341  | 4115 | 22.1539462 | 55.30692384 | 1.319896397  | Up   | 2.45E-12 | 5.78E-12 | AAEL010599-PA OS=Aedes aegypti GN=AAEL010599 PE=4 SV=1                                      |
| CCG001726.1 | 3026  | 615   | 4116 | 8.73310865 | 47.5506501  | 2.44489787   | Up   | 0        | 0        | AAEL003293-PA OS=Aedes aegypti GN=AAEL003293 PE=4 SV=1                                      |
| CCG001673.1 | 5895  | 1518  | 4119 | 11.06498   | 24.42631756 | 1.142435539  | Up   | 2.23E-12 | 5.30E-12 | AAEL006687-PA (Fragment) OS=Aedes aegypti GN=AAEL006687 PE=4 SV=1                           |
| CCG023250.1 | 1746  | 827   | 4122 | 20.3527895 | 82.53036475 | 2.019698474  | Up   | 1.96E-12 | 4.67E-12 | AAEL010841-PA OS=Aedes aegypti GN=AAEL010841 PE=4 SV=1                                      |
| CCG003509.1 | 2930  | 1128  | 4125 | 16.5426146 | 49.21600399 | 1.572940255  | Up   | 5.47E-12 | 1.24E-11 | AAEL012286-PA OS=Aedes aegypti GN=AAEL012286 PE=4 SV=1                                      |
| CCG019710.1 | 6042  | 228   | 4128 | 1.62149942 | 23.88410568 | 3.880650445  | Up   | 1.05E-13 | 3.28E-13 | Nuclear pore complex protein Nup205 OS=Culex quinquefasciatus GN=CpipJ_CPIJ003755 PE=4 SV=1 |

|             |       |      |      |            |             |             |    |          |          |                                                                                                   |
|-------------|-------|------|------|------------|-------------|-------------|----|----------|----------|---------------------------------------------------------------------------------------------------|
| CCG015609.1 | 8919  | 1288 | 4128 | 6.20529411 | 16.17981461 | 1.382623581 | Up | 7.16E-12 | 1.61E-11 | Nuclear receptor co-repressor 1<br>OS=Culex quinquefasciatus<br>GN=CpipJ_CPIJ002507 PE=4<br>SV=1  |
| CCG005820.1 | 1158  | 706  | 4129 | 26.1974375 | 124.6482943 | 2.250365534 | Up | 0        | 0        | AAEL000970-PA OS=Aedes<br>aegypti GN=AAEL000970 PE=4<br>SV=1                                      |
| CCG021289.1 | 1851  | 1036 | 4129 | 24.0500514 | 77.98094262 | 1.697081619 | Up | 3.37E-12 | 7.87E-12 | AAEL011063-PA OS=Aedes<br>aegypti GN=AAEL011063 PE=4<br>SV=1                                      |
| CCG007743.1 | 2064  | 1067 | 4129 | 22.2135208 | 69.93349069 | 1.654545446 | Up | 2.93E-12 | 6.87E-12 | AAEL006057-PA OS=Aedes<br>aegypti GN=AAEL006057 PE=4<br>SV=1                                      |
| CCG026099.1 | 13519 | 1306 | 4129 | 4.15108169 | 10.67702676 | 1.362950725 | Up | 6.89E-13 | 1.74E-12 | AAEL008105-PA OS=Aedes<br>aegypti GN=AAEL008105 PE=4<br>SV=1                                      |
| CCG009285.1 | 2983  | 1516 | 4136 | 21.8377867 | 48.47047695 | 1.150279636 | Up | 2.16E-12 | 5.15E-12 | AAEL013845-PA OS=Aedes<br>aegypti GN=AAEL013845 PE=4<br>SV=1                                      |
| CCG001405.1 | 4113  | 483  | 4138 | 5.04604469 | 35.17076326 | 2.801151755 | Up | 0        | 0        | AAEL003008-PA OS=Aedes<br>aegypti GN=AAEL003008 PE=4<br>SV=1                                      |
| CCG007055.1 | 5343  | 1218 | 4139 | 9.79545887 | 27.08072386 | 1.467081319 | Up | 3.82E-12 | 8.85E-12 | Putative uncharacterized protein<br>OS=Culex quinquefasciatus<br>GN=CpipJ_CPIJ000283 PE=4<br>SV=1 |
| CCG023329.2 | 14223 | 1532 | 4139 | 4.62839298 | 10.17312153 | 1.136179155 | Up | 1.74E-12 | 4.18E-12 | AAEL005174-PA OS=Aedes<br>aegypti GN=AAEL005174 PE=4<br>SV=1                                      |
| CCG002937.1 | 4964  | 1513 | 4140 | 13.0969397 | 29.15537184 | 1.154531984 | Up | 0        | 0        | AAEL003736-PA OS=Aedes<br>aegypti GN=AAEL003736 PE=4<br>SV=1                                      |
| CCG024477.1 | 966   | 12   | 4145 | 0.53378552 | 150.0021296 | 8.134507089 | Up | 1.30E-07 | 2.49E-07 | Long form D7 salivary protein D7I2<br>OS=Aedes albopictus PE=2 SV=1                               |
| CCG027348.1 | 3087  | 730  | 4145 | 10.1612913 | 46.93944192 | 2.207716936 | Up | 0        | 0        | AAEL003968-PA OS=Aedes<br>aegypti GN=AAEL003968 PE=4<br>SV=1                                      |
| CCG012743.1 | 1028  | 82   | 4170 | 3.42754692 | 141.8054612 | 5.370592868 | Up | 0        | 0        | AAEL010094-PA OS=Aedes<br>aegypti GN=AAEL010094 PE=3<br>SV=1                                      |
| CCG016741.1 | 7746  | 1645 | 4172 | 9.12538258 | 18.82854773 | 1.044964778 | Up | 3.83E-12 | 8.87E-12 | AAEL008642-PA OS=Aedes<br>aegypti GN=AAEL008642 PE=4<br>SV=1                                      |
| CCG027742.1 | 513   | 89   | 4187 | 7.45478827 | 285.3222317 | 5.258280976 | Up | 0        | 0        | AAEL009844-PA OS=Aedes<br>aegypti GN=AAEL009844 PE=4<br>SV=1                                      |
| CCG005192.1 | 2253  | 802  | 4187 | 15.2959286 | 64.96684636 | 2.08655598  | Up | 7.06E-13 | 1.78E-12 | AAEL000706-PA OS=Aedes<br>aegypti GN=AAEL000706 PE=3<br>SV=1                                      |

|             |       |       |      |            |             |              |      |          |          |                                                                                                   |
|-------------|-------|-------|------|------------|-------------|--------------|------|----------|----------|---------------------------------------------------------------------------------------------------|
| CCG021754.2 | 4639  | 858   | 4190 | 7.94740942 | 31.57473155 | 1.990213895  | Up   | 1.49E-14 | 5.27E-14 | Putative uncharacterized protein<br>OS=Culex quinquefasciatus<br>GN=CpipJ_CPIJ007358 PE=4<br>SV=1 |
| CCG009756.1 | 3002  | 291   | 4191 | 4.1652874  | 48.80417653 | 3.550516667  | Up   | 6.00E-14 | 1.99E-13 | AAEL000196-PA OS=Aedes<br>aegypti GN=AAEL006196 PE=4<br>SV=1                                      |
| CCG019170.1 | 2595  | 625   | 4194 | 10.3491654 | 56.49904153 | 2.44871197   | Up   | 0        | 0        | AAEL015099-PA OS=Aedes<br>aegypti GN=AAEL015099 PE=4<br>SV=1                                      |
| CCG000352.1 | 1785  | 415   | 4195 | 9.99016239 | 82.15684653 | 3.039800773  | Up   | 0        | 0        | AAEL004613-PA OS=Aedes<br>aegypti GN=AAEL004613 PE=4<br>SV=1                                      |
| CCG024232.1 | 2840  | 293   | 4197 | 4.43314516 | 51.66193226 | 3.542699097  | Up   | 4.19E-13 | 1.11E-12 | Ribonucleoside-diphosphate<br>reductase OS=Aedes aegypti<br>GN=RNR1 PE=2 SV=1                     |
| CCG028275.1 | 2037  | 952   | 4198 | 20.0820753 | 72.04459788 | 1.842981892  | Up   | 4.77E-13 | 1.24E-12 | AAEL006372-PA OS=Aedes<br>aegypti GN=AAEL006372 PE=4<br>SV=1                                      |
| CCG009142.1 | 737   | 32748 | 4201 | 1909.32547 | 199.2669209 | -3.260288906 | Down | 0        | 0        | ATP synthase-coupling factor 6,<br>mitochondrial OS=Aedes<br>albopictus PE=3 SV=1                 |
| CCG004691.1 | 4947  | 812   | 4203 | 7.0530472  | 29.70075546 | 2.074181028  | Up   | 1.91E-12 | 4.56E-12 | AAEL008306-PA OS=Aedes<br>aegypti GN=AAEL008306 PE=4<br>SV=1                                      |
| CCG020752.1 | 903   | 1365  | 4209 | 64.95425   | 162.9450575 | 1.326889762  | Up   | 1.68E-12 | 4.04E-12 | AAEL004129-PA OS=Aedes<br>aegypti GN=AAEL004129 PE=4<br>SV=1                                      |
| CCG012468.1 | 2085  | 1429  | 4211 | 29.4502402 | 70.60398249 | 1.261470163  | Up   | 2.28E-12 | 5.41E-12 | AAEL012821-PA OS=Aedes<br>aegypti GN=AAEL012821 PE=4<br>SV=1                                      |
| CCG010793.1 | 2315  | 454   | 4212 | 8.42689396 | 63.60443273 | 2.916054438  | Up   | 3.16E-13 | 8.66E-13 | AAEL006752-PA OS=Aedes<br>aegypti GN=AAEL006752 PE=4<br>SV=1                                      |
| CCG004698.1 | 38283 | 12182 | 4217 | 13.6733617 | 3.850770659 | -1.828148879 | Down | 0        | 0        | AAEL001504-PA OS=Aedes<br>aegypti GN=AAEL001504 PE=4<br>SV=1                                      |
| CCG011203.1 | 1095  | 280   | 4220 | 10.9876947 | 134.7250484 | 3.61605747   | Up   | 0        | 0        | Putative uncharacterized protein<br>OS=Culex quinquefasciatus<br>GN=CpipJ_CPIJ010850 PE=4<br>SV=1 |
| CCG002241.1 | 4737  | 140   | 4224 | 1.26995205 | 31.17242159 | 4.617424306  | Up   | 0        | 0        | Microtubule binding protein<br>OS=Culex quinquefasciatus<br>GN=CpipJ_CPIJ012473 PE=4<br>SV=1      |

|             |       |       |      |            |             |              |      |          |          |                                                                                                          |
|-------------|-------|-------|------|------------|-------------|--------------|------|----------|----------|----------------------------------------------------------------------------------------------------------|
| CCG019558.1 | 2652  | 1106  | 4227 | 17.9202589 | 55.7196968  | 1.636595931  | Up   | 2.74E-12 | 6.43E-12 | Phosphatidylinositol 3-kinase regulatory subunit OS=Culex quinquefasciatus GN=CpipJ_CPIJ011236 PE=4 SV=1 |
| CCG025858.1 | 7266  | 1137  | 4232 | 6.72400059 | 20.36105523 | 1.598420577  | Up   | 4.86E-12 | 1.11E-11 | AAEL000693-PA OS=Aedes aegypti GN=AAEL000693 PE=4 SV=1                                                   |
| CCG009649.3 | 2304  | 610   | 4235 | 11.3765356 | 64.25707558 | 2.497794026  | Up   | 3.62E-13 | 9.71E-13 | M-kinase phosphoprotein 11 OS=Culex quinquefasciatus GN=CpipJ_CPIJ011412 PE=4 SV=1                       |
| CCG026982.1 | 5388  | 612   | 4241 | 4.88074937 | 27.5163422  | 2.495114129  | Up   | 6.59E-13 | 1.68E-12 | Uncharacterized protein OS=Anopheles darlingi GN=AND_16871 PE=4 SV=1                                     |
| CCG020637.1 | 1917  | 991   | 4246 | 22.2133579 | 77.42975648 | 1.801460613  | Up   | 5.56E-12 | 1.26E-11 | AAEL001432-PA OS=Aedes aegypti GN=AAEL001432 PE=3 SV=1                                                   |
| CCG023730.1 | 2289  | 931   | 4254 | 17.4769869 | 64.96833088 | 1.894280164  | Up   | 9.75E-13 | 2.41E-12 | AAEL013644-PA OS=Aedes aegypti GN=AAEL013644 PE=4 SV=1                                                   |
| CCG021377.1 | 3294  | 657   | 4256 | 8.57046619 | 45.16770672 | 2.397846079  | Up   | 0        | 0        | AAEL008741-PA OS=Aedes aegypti GN=AAEL008741 PE=4 SV=1                                                   |
| CCG012962.1 | 11589 | 11258 | 4262 | 41.7424517 | 12.85634443 | -1.699034851 | Down | 0        | 0        | AAEL000405-PA (Fragment) OS=Aedes aegypti GN=AAEL000405 PE=4 SV=1                                        |
| CCG009805.2 | 3630  | 375   | 4263 | 4.43902217 | 41.05430685 | 3.209219758  | Up   | 0        | 0        | Uncharacterized protein OS=Anopheles darlingi GN=AND_19518 PE=4 SV=1                                     |
| CCG016683.1 | 1762  | 1233  | 4264 | 30.0690595 | 84.59823618 | 1.492347842  | Up   | 3.53E-12 | 8.21E-12 | Adenylate kinase OS=Glossina morsitans morsitans PE=2 SV=1                                               |
| CCG008919.1 | 2336  | 931   | 4266 | 17.1253523 | 63.84075715 | 1.898344097  | Up   | 9.75E-13 | 2.41E-12 | AISZC17 OS=Culex quinquefasciatus GN=CpipJ_CPIJ008428 PE=4 SV=1                                          |
| CCG025989.2 | 633   | 31910 | 4274 | 2166.13623 | 236.0374011 | -3.198036592 | Down | 0        | 0        | AAEL010823-PA OS=Aedes aegypti GN=AAEL010823 PE=3 SV=1                                                   |
| CCG019046.2 | 4554  | 1739  | 4282 | 16.4085131 | 32.87029889 | 1.002340067  | Up   | 4.99E-12 | 1.13E-11 | AAEL009142-PA OS=Aedes aegypti GN=AAEL009142 PE=4 SV=1                                                   |
| CCG019454.1 | 8531  | 1544  | 4290 | 7.77696287 | 17.57953433 | 1.176618099  | Up   | 4.92E-12 | 1.12E-11 | AAEL011640-PA OS=Aedes aegypti GN=AAEL011640 PE=4 SV=1                                                   |



|             |       |       |      |            |             |              |      |          |          |                                                                   |
|-------------|-------|-------|------|------------|-------------|--------------|------|----------|----------|-------------------------------------------------------------------|
| CCG008892.2 | 4737  | 809   | 4291 | 7.33850861 | 31.66687052 | 2.109415497  | Up   | 1.25E-12 | 3.04E-12 | AAEL001165-PA OS=Aedes aegypti GN=AAEL001165 PE=4 SV=1            |
| CCG027599.1 | 3597  | 496   | 4292 | 5.92521222 | 41.71279508 | 2.815551254  | Up   | 6.79E-13 | 1.71E-12 | AAEL010913-PA (Fragment) OS=Aedes aegypti GN=AAEL010913 PE=4 SV=1 |
| CCG016653.1 | 2329  | 1149  | 4292 | 21.1988944 | 64.42289562 | 1.603584482  | Up   | 3.86E-12 | 8.94E-12 | AAEL002834-PA OS=Aedes aegypti GN=AAEL002834 PE=4 SV=1            |
| CCG020203.1 | 28922 | 9136  | 4292 | 13.573456  | 5.187778297 | -1.387599371 | Down | 0        | 0        | AAEL013633-PA OS=Aedes aegypti GN=AAEL013633 PE=3 SV=1            |
| CCG007967.1 | 6761  | 1286  | 4296 | 8.17321087 | 22.2128024  | 1.442416554  | Up   | 6.57E-12 | 1.48E-11 | AAEL002235-PA OS=Aedes aegypti GN=AAEL002235 PE=4 SV=1            |
| CCG022179.1 | 4626  | 846   | 4298 | 7.85827831 | 32.4796095  | 2.047249118  | Up   | 0        | 0        | AAEL007447-PA OS=Aedes aegypti GN=AAEL007447 PE=4 SV=2            |
| CCG016423.1 | 1011  | 508   | 4305 | 21.5911228 | 148.8579441 | 2.785426039  | Up   | 6.20E-13 | 1.58E-12 | AAEL007046-PA OS=Aedes aegypti GN=AAEL007046 PE=3 SV=1            |
| CCG001369.2 | 5760  | 530   | 4308 | 3.95381239 | 26.14587784 | 2.725267189  | Up   | 0        | 0        | AAEL004290-PA (Fragment) OS=Aedes aegypti GN=AAEL004290 PE=3 SV=1 |
| CCG027631.1 | 1306  | 31420 | 4309 | 1033.77417 | 115.3408994 | -3.163944973 | Down | 0        | 0        | AAEL010143-PA OS=Aedes aegypti GN=AAEL010143 PE=3 SV=1            |
| CCG025106.2 | 2059  | 22802 | 4316 | 475.860072 | 73.27825282 | -2.699080397 | Down | 0        | 0        | AAEL005617-PA OS=Aedes aegypti GN=UGP PE=2 SV=1                   |
| CCG007833.1 | 5376  | 178   | 4321 | 1.42273303 | 28.09797506 | 4.303729288  | Up   | 1.15E-13 | 3.57E-13 | AAEL008709-PA OS=Aedes aegypti GN=AAEL008709 PE=4 SV=1            |
| CCG024098.1 | 2371  | 32    | 4326 | 0.57993737 | 63.78300519 | 6.781131154  | Up   | 1.77E-13 | 5.17E-13 | AAEL013813-PA OS=Aedes aegypti GN=AAEL013813 PE=4 SV=1            |
| CCG020586.1 | 2190  | 1024  | 4334 | 20.0917846 | 69.18227011 | 1.783796642  | Up   | 2.58E-12 | 6.08E-12 | AAEL007397-PC OS=Aedes aegypti GN=e75B PE=2 SV=1                  |
| CCG006899.1 | 4362  | 389   | 4336 | 3.8320098  | 34.74990557 | 3.1808359    | Up   | 0        | 0        | AAEL006963-PA OS=Aedes aegypti GN=AAEL006963 PE=4 SV=1            |
| CCG011655.1 | 2706  | 99    | 4338 | 1.57206346 | 56.04176077 | 5.155770921  | Up   | 0        | 0        | AAEL004831-PA OS=Aedes aegypti GN=AAEL004831 PE=4 SV=1            |
| CCG011548.1 | 1998  | 326   | 4339 | 7.01107782 | 75.91789936 | 3.43673192   | Up   | 6.17E-13 | 1.58E-12 | AAEL002981-PA OS=Aedes aegypti GN=AAEL002981 PE=4 SV=1            |

|             |       |      |      |            |             |             |    |          |          |                                                                                     |
|-------------|-------|------|------|------------|-------------|-------------|----|----------|----------|-------------------------------------------------------------------------------------|
| CCG011658.1 | 5190  | 489  | 4342 | 4.04859349 | 29.24640419 | 2.852766559 | Up | 1.91E-13 | 5.52E-13 | AAEL000386-PA OS=Aedes aegypti GN=AAEL000386 PE=4 SV=1                              |
| CCG023117.1 | 5154  | 716  | 4345 | 5.96940822 | 29.47103465 | 2.303637888 | Up | 0        | 0        | AAEL014260-PA OS=Aedes aegypti GN=AAEL014260 PE=4 SV=1                              |
| CCG019844.1 | 7719  | 519  | 4346 | 2.88914267 | 19.68242918 | 2.768194935 | Up | 0        | 0        | AAEL012147-PA OS=Aedes aegypti GN=AAEL012147 PE=4 SV=1                              |
| CCG005931.1 | 3515  | 954  | 4353 | 11.6623405 | 43.29256865 | 1.892262053 | Up | 2.67E-12 | 6.29E-12 | AAEL007201-PA (Fragment) OS=Aedes aegypti GN=AAEL007201 PE=4 SV=1                   |
| CCG018646.1 | 3432  | 1723 | 4358 | 21.5725095 | 44.39049247 | 1.041056699 | Up | 0        | 0        | AAEL013920-PA OS=Aedes aegypti GN=AAEL013920 PE=4 SV=1                              |
| CCG024363.1 | 2181  | 1257 | 4366 | 24.7652253 | 69.98066776 | 1.498640684 | Up | 1.92E-12 | 4.59E-12 | AAEL007042-PA OS=Aedes aegypti GN=AAEL007042 PE=4 SV=1                              |
| CCG007013.1 | 3336  | 953  | 4384 | 12.2752269 | 45.94037331 | 1.904012883 | Up | 1.54E-12 | 3.70E-12 | AAEL003901-PA OS=Aedes aegypti GN=AAEL003901 PE=4 SV=1                              |
| CCG000010.1 | 4673  | 1593 | 4386 | 14.6481462 | 32.81125656 | 1.163472749 | Up | 2.15E-12 | 5.13E-12 | AAEL001273-PA OS=Aedes aegypti GN=AAEL001273 PE=4 SV=1                              |
| CCG000489.1 | 4162  | 763  | 4390 | 7.87744054 | 36.87333855 | 2.226779181 | Up | 4.81E-13 | 1.25E-12 | DNA-directed RNA polymerase OS=Culex quinquefasciatus GN=CpipJ_CPIJ007655 PE=3 SV=1 |
| CCG028292.1 | 4896  | 917  | 4397 | 8.04804874 | 31.39533149 | 1.963839097 | Up | 0        | 0        | AAEL009893-PA OS=Aedes aegypti GN=AAEL009893 PE=4 SV=1                              |
| CCG027126.1 | 40417 | 1193 | 4397 | 1.26834979 | 3.803140831 | 1.584238693 | Up | 2.22E-12 | 5.28E-12 | AGAP013535-PA OS=Anopheles gambiae GN=AgaP_AGAP013535 PE=4 SV=1                     |
| CCG022444.1 | 9367  | 770  | 4400 | 3.53226173 | 16.42109723 | 2.216886377 | Up | 0        | 0        | AAEL010502-PA OS=Aedes aegypti GN=AAEL010502 PE=4 SV=1                              |
| CCG012397.1 | 3091  | 1486 | 4403 | 20.6577242 | 49.79660066 | 1.269365932 | Up | 5.90E-12 | 1.33E-11 | Uridine kinase OS=Aedes aegypti GN=AAEL011273 PE=3 SV=1                             |
| CCG026861.1 | 2289  | 558  | 4407 | 10.4749288 | 67.30499158 | 2.683773073 | Up | 2.34E-13 | 6.64E-13 | AAEL001129-PA OS=Aedes aegypti GN=AAEL001129 PE=4 SV=1                              |
| CCG027478.1 | 1177  | 1722 | 4418 | 62.8665106 | 131.2197679 | 1.06162148  | Up | 1.20E-12 | 2.92E-12 | Uncharacterized protein OS=Anopheles darlingi GN=AND_18279 PE=4 SV=1                |

|             |       |       |      |            |             |              |      |          |          |                                                                                           |
|-------------|-------|-------|------|------------|-------------|--------------|------|----------|----------|-------------------------------------------------------------------------------------------|
| CCG013376.1 | 801   | 313   | 4432 | 16.79092   | 193.4270695 | 3.526036523  | Up   | 0        | 0        | AAEL005312-PE OS=Aedes aegypti PE=2 SV=1                                                  |
| CCG019932.1 | 6780  | 1480  | 4433 | 9.37982407 | 22.85693819 | 1.28499939   | Up   | 6.02E-12 | 1.36E-11 | Ubiquitin carboxyl-terminal hydrolase (Fragment) OS=Aedes aegypti GN=AAEL009824 PE=3 SV=1 |
| CCG002687.2 | 2382  | 1140  | 4438 | 20.5648604 | 65.13217142 | 1.663189047  | Up   | 4.59E-12 | 1.05E-11 | AAEL001919-FA OS=Aedes aegypti GN=AAEL001919 PE=4 SV=1                                    |
| CCG004630.1 | 820   | 476   | 4442 | 24.9434069 | 189.3715432 | 2.924489118  | Up   | 4.62E-13 | 1.21E-12 | AAEL008441-FA OS=Aedes aegypti GN=AAEL008441 PE=4 SV=1                                    |
| CCG024905.1 | 3222  | 800   | 4447 | 10.6690837 | 48.24936586 | 2.177073703  | Up   | 9.48E-13 | 2.35E-12 | AAEL003789-FA OS=Aedes aegypti GN=AAEL003789 PE=4 SV=1                                    |
| CCG003459.1 | 35726 | 1771  | 4453 | 2.13008453 | 4.357308584 | 1.032526604  | Up   | 0        | 0        | AAEL013189-FA OS=Aedes aegypti GN=AAEL013189 PE=4 SV=1                                    |
| CCG007457.1 | 2226  | 323   | 4456 | 6.23505134 | 69.97937165 | 3.488456366  | Up   | 1.55E-13 | 4.61E-13 | AAEL007544-FA OS=Aedes aegypti GN=AAEL007544 PE=4 SV=1                                    |
| CCG008958.1 | 2076  | 823   | 4466 | 17.0347262 | 75.2040771  | 2.142332119  | Up   | 7.96E-13 | 2.00E-12 | AAEL009326-FA OS=Aedes aegypti GN=AAEL009326 PE=4 SV=1                                    |
| CCG021947.1 | 3323  | 705   | 4470 | 9.11635958 | 47.02482611 | 2.366892873  | Up   | 7.66E-13 | 1.92E-12 | AAEL002798-FA OS=Aedes aegypti GN=AAEL002798 PE=4 SV=1                                    |
| CCG011635.1 | 2847  | 11301 | 4477 | 170.565849 | 54.97302603 | -1.633533012 | Down | 0        | 0        | AAEL004805-FA OS=Aedes aegypti GN=AAEL004805 PE=4 SV=1                                    |
| CCG022154.1 | 12321 | 12881 | 4480 | 44.9227458 | 12.7110689  | -1.821360758 | Down | 0        | 0        | AAEL013559-FA OS=Aedes aegypti GN=AAEL013559 PE=4 SV=1                                    |
| CCG025914.2 | 1254  | 15663 | 4496 | 536.710489 | 125.336852  | -2.09833342  | Down | 0        | 0        | AAEL005170-FA OS=Aedes aegypti GN=AAEL005170 PE=4 SV=1                                    |
| CCG013094.2 | 5811  | 774   | 4498 | 5.72338231 | 27.05942676 | 2.241191393  | Up   | 0        | 0        | Uncharacterized protein OS=Anopheles darlingi GN=AND_16871 PE=4 SV=1                      |
| CCG024993.1 | 11511 | 1694  | 4508 | 6.32358009 | 13.69054919 | 1.114366845  | Up   | 6.33E-13 | 1.61E-12 | AAEL002628-FA OS=Aedes aegypti GN=AAEL002628 PE=4 SV=1                                    |
| CCG002966.1 | 561   | 748   | 4516 | 57.2929795 | 281.4110123 | 2.296248515  | Up   | 4.45E-13 | 1.17E-12 | 60S ribosomal protein L17 OS=Culex quinquefasciatus GN=CpipJ_CPIJ015624 PE=3 SV=1         |

|             |       |       |      |            |             |              |      |          |          |                                                                                           |
|-------------|-------|-------|------|------------|-------------|--------------|------|----------|----------|-------------------------------------------------------------------------------------------|
| CCG010940.1 | 3243  | 1307  | 4516 | 17.3177438 | 48.68072091 | 1.491099549  | Up   | 3.63E-12 | 8.42E-12 | AAEL002986-PA OS=Aedes aegypti GN=AAEL002986 PE=4 SV=1                                    |
| CCG006287.1 | 837   | 872   | 4517 | 44.7665574 | 188.6577493 | 2.075278077  | Up   | 4.80E-13 | 1.25E-12 | AAEL011542-PA OS=Aedes aegypti GN=AAEL011542 PE=3 SV=1                                    |
| CCG020111.1 | 745   | 11    | 4521 | 0.63445246 | 212.1427776 | 8.385307787  | Up   | 2.67E-07 | 5.03E-07 | -                                                                                         |
| CCG019787.1 | 6215  | 917   | 4527 | 6.34002359 | 25.46357505 | 2.005874871  | Up   | 0        | 0        | AAEL000430-PA OS=Aedes aegypti GN=AAEL000430 PE=4 SV=1                                    |
| CCG014045.1 | 2945  | 1561  | 4532 | 22.776148  | 53.79657397 | 1.239990528  | Up   | 5.93E-12 | 1.34E-11 | AAEL012217-PA OS=Aedes aegypti GN=AAEL012217 PE=4 SV=1                                    |
| CCG017125.1 | 1833  | 1481  | 4541 | 34.7180453 | 86.60421976 | 1.3187516    | Up   | 5.54E-12 | 1.25E-11 | AAEL012845-PA OS=Aedes aegypti GN=AAEL012845 PE=4 SV=1                                    |
| CCG000217.1 | 2246  | 896   | 4545 | 17.1419778 | 70.74148171 | 2.045022861  | Up   | 6.75E-14 | 2.21E-13 | Ribonucleotide reductase R2 subunit OS=Aedes albopictus PE=2 SV=1                         |
| CCG025514.1 | 1892  | 384   | 4548 | 8.72113007 | 84.03289786 | 3.268367242  | Up   | 1.03E-12 | 2.55E-12 | AAEL009882-PA OS=Aedes aegypti GN=AAEL009882 PE=4 SV=1                                    |
| CCG025948.4 | 18727 | 841   | 4554 | 1.92970293 | 8.501094271 | 2.13926979   | Up   | 1.23E-12 | 3.01E-12 | Glucosamine-6-phosphate isomerase OS=Culex quinquefasciatus GN=CpipJ_CPIJ008074 PE=3 SV=1 |
| CCG019902.2 | 4451  | 710   | 4561 | 6.854305   | 35.82221981 | 2.385772444  | Up   | 9.64E-14 | 3.03E-13 | AAEL002369-PA OS=Aedes aegypti GN=AAEL002369 PE=4 SV=1                                    |
| CCG005123.1 | 882   | 1496  | 4566 | 72.8829059 | 180.9744804 | 1.312133888  | Up   | 1.42E-12 | 3.44E-12 | AAEL003990-PA OS=Aedes aegypti GN=AAEL003990 PE=4 SV=1                                    |
| CCG000669.1 | 2694  | 1092  | 4569 | 17.4175762 | 59.28892597 | 1.76721879   | Up   | 3.67E-12 | 8.53E-12 | AAEL009105-PA OS=Aedes aegypti GN=AAEL009105 PE=4 SV=1                                    |
| CCG003625.1 | 1970  | 1623  | 4578 | 35.4009539 | 81.23806653 | 1.198367667  | Up   | 4.27E-12 | 9.85E-12 | AAEL003285-PA OS=Aedes aegypti GN=AAEL003285 PE=2 SV=1                                    |
| CCG002038.1 | 1224  | 20972 | 4578 | 736.242871 | 130.7508097 | -2.493361879 | Down | 0        | 0        | ATP synthase subunit gamma OS=Aedes aegypti GN=AAEL008848 PE=3 SV=1                       |
| CCG007944.1 | 1224  | 11657 | 4579 | 409.230553 | 130.7793704 | -1.645778876 | Down | 0        | 0        | Arginine kinase OS=Culex quinquefasciatus GN=CpipJ_CPIJ007538 PE=3 SV=1                   |

|             |       |      |      |            |             |             |    |          |          |                                                                              |
|-------------|-------|------|------|------------|-------------|-------------|----|----------|----------|------------------------------------------------------------------------------|
| CCG010717.1 | 2610  | 124  | 4581 | 2.04147398 | 61.35780302 | 4.909563741 | Up | 1.61E-13 | 4.77E-13 | AAEL014683-PA OS=Reedes aegypti GN=AAEL014683 PE=4 SV=1                      |
| CCG003149.1 | 1494  | 677  | 4590 | 19.4715598 | 107.4019347 | 2.463579619 | Up | 4.03E-13 | 1.07E-12 | AAEL013950-PA OS=Reedes aegypti GN=AAEL013950 PE=3 SV=1                      |
| CCG021221.1 | 1869  | 1283 | 4608 | 29.4971479 | 86.18926665 | 1.54693275  | Up | 9.34E-13 | 2.32E-12 | AAEL001007-PA OS=Reedes aegypti GN=AAEL001007 PE=4 SV=1                      |
| CCG023452.1 | 3210  | 1336 | 4608 | 17.8839768 | 50.18309638 | 1.488533913 | Up | 0        | 0        | AAEL005455-PA OS=Reedes aegypti GN=AAEL005455 PE=4 SV=1                      |
| CCG025472.1 | 3117  | 354  | 4612 | 4.8801046  | 51.72523981 | 3.405884451 | Up | 0        | 0        | AAEL004228-PA OS=Reedes aegypti GN=AAEL004228 PE=4 SV=1                      |
| CCG006884.1 | 2643  | 414  | 4614 | 6.73078703 | 61.02818351 | 3.180628535 | Up | 8.70E-13 | 2.17E-12 | Phosphatase zC gamma OS=Culex quinquefasciatus GN=CpipJ_CPIJ017206 PE=3 SV=1 |
| CCG027273.1 | 1654  | 1228 | 4615 | 31.9025599 | 97.5407783  | 1.612333291 | Up | 4.21E-12 | 9.72E-12 | AAEL001188-PA OS=Reedes aegypti GN=AAEL001188 PE=4 SV=1                      |
| CCG015076.1 | 2561  | 643  | 4616 | 10.7885745 | 63.00952971 | 2.546065785 | Up | 0        | 0        | AAEL005736-PA OS=Reedes aegypti GN=AAEL005736 PE=4 SV=1                      |
| CCG014707.1 | 504   | 149  | 4624 | 12.7033541 | 320.7283171 | 4.658070366 | Up | 2.33E-13 | 6.63E-13 | -                                                                            |
| CCG026971.1 | 4626  | 458  | 4624 | 4.25424523 | 34.94316295 | 3.038035098 | Up | 1.14E-12 | 2.79E-12 | AAEL008730-PA OS=Reedes aegypti GN=AAEL008730 PE=4 SV=1                      |
| CCG018120.1 | 2901  | 1554 | 4626 | 23.0179137 | 55.74525624 | 1.276091966 | Up | 4.78E-12 | 1.09E-11 | AAEL001448-PA OS=Reedes aegypti GN=AAEL001448 PE=4 SV=1                      |
| CCG016323.1 | 65605 | 1597 | 4629 | 1.0459975  | 2.466608691 | 1.237649454 | Up | 6.60E-12 | 1.48E-11 | AAEL013859-PA OS=Reedes aegypti GN=AAEL013859 PE=4 SV=1                      |
| CCG002819.1 | 2439  | 43   | 4637 | 0.757564   | 66.46229167 | 6.45502446  | Up | 8.46E-14 | 2.70E-13 | AAEL003261-PA OS=Reedes aegypti GN=AAEL003261 PE=4 SV=1                      |
| CCG017917.1 | 4192  | 1241 | 4643 | 12.7207635 | 38.71929367 | 1.605867369 | Up | 3.14E-12 | 7.34E-12 | AAEL013866-PA OS=Reedes aegypti GN=AAEL013866 PE=4 SV=1                      |
| CCG028242.1 | 1122  | 1702 | 4648 | 65.1822534 | 144.8182446 | 1.151692236 | Up | 5.16E-12 | 1.17E-11 | AAEL004589-PA OS=Reedes aegypti GN=AAEL004589 PE=3 SV=1                      |
| CCG016955.1 | 1215  | 1207 | 4665 | 42.6868063 | 134.2225195 | 1.652764609 | Up | 6.35E-12 | 1.43E-11 | AAEL004501-PA OS=Reedes aegypti GN=AAEL004501 PE=3 SV=1                      |
| CCG021215.1 | 2472  | 353  | 4672 | 6.13605029 | 66.07001176 | 3.428613389 | Up | 0        | 0        | AAEL004818-PA OS=Reedes aegypti GN=AAEL004818 PE=4 SV=1                      |

|             |       |       |      |            |             |              |      |          |          |                                                                                                   |
|-------------|-------|-------|------|------------|-------------|--------------|------|----------|----------|---------------------------------------------------------------------------------------------------|
| CCG005355.1 | 6053  | 826   | 4674 | 5.86370408 | 26.99405016 | 2.202757251  | Up   | 1.49E-13 | 4.45E-13 | Putative uncharacterized protein<br>OS=Culex quinquefasciatus<br>GN=CpipJ_CPIJ013516 PE=4<br>SV=1 |
| CCG003693.1 | 35225 | 1525  | 4680 | 1.86029369 | 4.644563103 | 1.320012491  | Up   | 7.80E-12 | 1.75E-11 | AAEL005080-PA OS=Aedes<br>aegypti GN=AAEL005080 PE=4<br>SV=1                                      |
| CCG027568.1 | 3002  | 490   | 4681 | 7.01371418 | 54.51022437 | 2.958276315  | Up   | 0        | 0        | AAEL004870-PA OS=Aedes<br>aegypti GN=CYP18A1 PE=3 SV=1                                            |
| CCG016182.1 | 1458  | 11537 | 4685 | 340.014971 | 112.331637  | -1.597833968 | Down | 0        | 0        | AGAP001419-PC OS=Anopheles<br>gambiae GN=AgaP_AGAP001419<br>PE=4 SV=1                             |
| CCG027465.1 | 3086  | 592   | 4687 | 8.24305991 | 53.09444045 | 2.687308918  | Up   | 4.13E-13 | 1.10E-12 | Putative uncharacterized protein<br>OS=Culex quinquefasciatus<br>GN=CpipJ_CPIJ012359 PE=4<br>SV=1 |
| CCG006534.1 | 2670  | 84    | 4692 | 1.35185682 | 61.43229761 | 5.505983079  | Up   | 0        | 0        | AAEL008098-PA OS=Aedes<br>aegypti GN=PIWI2 PE=4 SV=1                                              |
| CCG005401.1 | 8238  | 1602  | 4702 | 8.35609551 | 19.9531218  | 1.255713595  | Up   | 1.61E-12 | 3.87E-12 | Putative uncharacterized protein<br>OS=Culex quinquefasciatus<br>GN=CpipJ_CPIJ003108 PE=4<br>SV=1 |
| CCG003339.1 | 2259  | 12109 | 4706 | 230.332234 | 72.8258745  | -1.661193298 | Down | 0        | 0        | AAEL012160-PA OS=Aedes<br>aegypti GN=AAEL012160 PE=4<br>SV=1                                      |
| CCG008539.2 | 2247  | 1435  | 4708 | 27.4417308 | 73.24591324 | 1.416376787  | Up   | 5.38E-12 | 1.22E-11 | T-complex protein 1 subunit alpha<br>OS=Aedes aegypti<br>GN=AAEL009320 PE=3 SV=1                  |
| CCG008734.1 | 3174  | 8034  | 4710 | 108.764602 | 51.87570372 | -1.068078198 | Down | 0        | 0        | AAEL007979-PA OS=Aedes<br>aegypti GN=AAEL007979 PE=4<br>SV=1                                      |
| CCG002170.1 | 1560  | 57    | 4711 | 1.570048   | 105.569514  | 6.071240806  | Up   | 0        | 0        | AAEL002554-PA OS=Aedes<br>aegypti GN=AAEL002554 PE=4<br>SV=1                                      |
| CCG022824.1 | 13389 | 950   | 4716 | 3.04886458 | 12.31333432 | 2.013877504  | Up   | 7.21E-13 | 1.81E-12 | AAEL012187-PA OS=Aedes<br>aegypti GN=AAEL012187 PE=4<br>SV=1                                      |
| CCG006600.1 | 3559  | 930   | 4720 | 11.2283937 | 46.36219903 | 2.045797442  | Up   | 0        | 0        | AAEL008319-PA OS=Aedes<br>aegypti GN=AAEL008319 PE=4<br>SV=1                                      |
| CCG018476.1 | 660   | 9178  | 4728 | 597.539734 | 250.4283827 | -1.254636567 | Down | 0        | 0        | AAEL007162-PA OS=Aedes<br>aegypti GN=AAEL007162 PE=3<br>SV=1                                      |
| CCG005050.1 | 3137  | 1430  | 4736 | 19.5877337 | 52.77730277 | 1.429967138  | Up   | 4.48E-12 | 1.03E-11 | AAEL003367-PA OS=Aedes<br>aegypti GN=AAEL003367 PE=4<br>SV=1                                      |

|             |       |       |      |            |             |              |      |          |          |                                                                                            |
|-------------|-------|-------|------|------------|-------------|--------------|------|----------|----------|--------------------------------------------------------------------------------------------|
| CCG018418.2 | 3737  | 1009  | 4739 | 11.6019433 | 44.33162259 | 1.93396969   | Up   | 2.35E-12 | 5.55E-12 | AAEL000427-PA OS=Aedes aegypti GN=AAEL000427 PE=4 SV=1                                     |
| CCG022020.1 | 11047 | 1839  | 4746 | 7.15319471 | 15.01873645 | 1.070103825  | Up   | 0        | 0        | AAEL011584-PA OS=Aedes aegypti GN=AAEL011584 PE=3 SV=1                                     |
| CCG009084.2 | 3873  | 1146  | 4755 | 12.7145148 | 42.91934058 | 1.755151501  | Up   | 4.08E-12 | 9.43E-12 | S-hydroxyisobutyrate dehydrogenase OS=Culex quinquefasciatus GN=CpipJ_CPIJ000400 PE=4 SV=1 |
| CCG003712.1 | 22503 | 15587 | 4755 | 29.7635539 | 7.386864243 | -2.010512832 | Down | 0        | 0        | AAEL002436-PA (Fragment) OS=Aedes aegypti GN=AAEL002436 PE=2 SV=1                          |
| CCG026842.1 | 1699  | 1757  | 4760 | 44.4366237 | 97.94078719 | 1.140160586  | Up   | 0        | 0        | AAEL003676-PA OS=Aedes aegypti GN=AAEL003676 PE=4 SV=1                                     |
| CCG010262.1 | 3414  | 1324  | 4763 | 16.6643025 | 48.77160875 | 1.54928063   | Up   | 1.05E-12 | 2.59E-12 | AGAP009189-PA (Fragment) OS=Anopheles gambiae GN=AGAP009189 PE=4 SV=4                      |
| CCG028049.1 | 1539  | 1435  | 4764 | 40.0659969 | 108.213925  | 1.43343588   | Up   | 5.38E-12 | 1.22E-11 | AAEL002866-PA OS=Aedes aegypti GN=AAEL002866 PE=3 SV=1                                     |
| CCG018650.1 | 4569  | 404   | 4768 | 3.79946876 | 36.48086313 | 3.263270242  | Up   | 1.18E-13 | 3.65E-13 | AAEL005597-PA OS=Aedes aegypti GN=AAEL005597 PE=4 SV=1                                     |
| CCG004132.1 | 5895  | 1335  | 4769 | 9.73105949 | 28.28091975 | 1.539160245  | Up   | 6.03E-12 | 1.36E-11 | AAEL003487-PA (Fragment) OS=Aedes aegypti GN=AAEL003487 PE=4 SV=1                          |
| CCG010244.1 | 10200 | 1273  | 4774 | 5.36279139 | 16.36184444 | 1.609279351  | Up   | 4.95E-12 | 1.13E-11 | AAEL007069-PA OS=Aedes aegypti GN=AAEL007069 PE=4 SV=1                                     |
| CCG005319.1 | 9360  | 12630 | 4785 | 57.981597  | 17.87129854 | -1.697950605 | Down | 0        | 0        | AAEL003078-PA OS=Aedes aegypti GN=AAEL003078 PE=4 SV=1                                     |
| CCG006745.1 | 2399  | 23006 | 4787 | 412.072411 | 69.75626132 | -2.562503252 | Down | 0        | 0        | AAEL002764-PA OS=Aedes aegypti GN=AAEL002764 PE=3 SV=1                                     |
| CCG012844.1 | 9873  | 934   | 4796 | 4.0649987  | 16.98165658 | 2.062650408  | Up   | 3.46E-13 | 9.34E-13 | Putative uncharacterized protein OS=Culex quinquefasciatus GN=CpipJ_CPIJ000695 PE=4 SV=1   |
| CCG000294.1 | 3424  | 1349  | 4812 | 16.9293727 | 49.12944738 | 1.537059498  | Up   | 8.73E-12 | 1.95E-11 | Uncharacterized protein OS=Anopheles darlingi GN=AND_02441 PE=3 SV=1                       |

|             |       |       |      |            |             |              |      |          |          |                                                                   |
|-------------|-------|-------|------|------------|-------------|--------------|------|----------|----------|-------------------------------------------------------------------|
| CCG015426.1 | 6615  | 498   | 4813 | 3.23490973 | 25.43525111 | 2.97503198   | Up   | 3.42E-13 | 9.25E-13 | AAEL004375-PA OS=Aedes aegypti GN=AAEL004375 PE=4 SV=1            |
| CCG017215.1 | 3156  | 785   | 4813 | 10.6879726 | 53.31247975 | 2.318485068  | Up   | 0        | 0        | AAEL001440-PA OS=Aedes aegypti GN=AAEL001440 PE=4 SV=1            |
| CCG013216.1 | 2470  | 15316 | 4829 | 266.447148 | 68.34555406 | -1.962929993 | Down | 0        | 0        | AAEL003740-PA OS=Aedes aegypti GN=AAEL003746 PE=4 SV=1            |
| CCG009712.1 | 4551  | 1439  | 4843 | 13.5867827 | 37.20126003 | 1.453147615  | Up   | 3.28E-12 | 7.67E-12 | AAEL002345-PA OS=Aedes aegypti GN=AAEL002345 PE=4 SV=1            |
| CCG004388.1 | 3507  | 8532  | 4854 | 104.538858 | 48.38536511 | -1.111396653 | Down | 0        | 0        | Pyruvate carboxylase OS=Aedes aegypti PE=2 SV=1                   |
| CCG025919.1 | 3888  | 469   | 4858 | 5.18333476 | 43.67986331 | 3.075015866  | Up   | 0        | 0        | AAEL007823-PA OS=Aedes aegypti GN=AAEL007823 PE=4 SV=1            |
| CCG010477.1 | 3206  | 1542  | 4862 | 20.6672897 | 53.01532803 | 1.359060332  | Up   | 2.49E-12 | 5.89E-12 | AAEL008216-PA OS=Aedes aegypti GN=AAEL008216 PE=4 SV=1            |
| CCG017381.1 | 2911  | 1834  | 4871 | 27.0719661 | 58.49596914 | 1.111537548  | Up   | 0        | 0        | AAEL002804-PA OS=Aedes aegypti GN=AAEL002804 PE=4 SV=1            |
| CCG007203.1 | 2129  | 13921 | 4887 | 280.968377 | 80.24476214 | -1.807928636 | Down | 0        | 0        | AAEL013431-PA (Fragment) OS=Aedes aegypti GN=AAEL013431 PE=4 SV=1 |
| CCG005131.1 | 2481  | 24886 | 4887 | 431.01363  | 68.85977371 | -2.646000147 | Down | 0        | 0        | AAEL006323-PA OS=Aedes aegypti GN=AAEL006323 PE=4 SV=1            |
| CCG003104.1 | 3153  | 1835  | 4891 | 25.0077586 | 54.22801513 | 1.116662605  | Up   | 0        | 0        | AAEL002152-PA OS=Aedes aegypti GN=AAEL002152 PE=4 SV=1            |
| CCG003603.1 | 11322 | 855   | 4892 | 3.24493226 | 15.10474209 | 2.218741283  | Up   | 0        | 0        | AAEL013278-PA OS=Aedes aegypti GN=AAEL013278 PE=4 SV=1            |
| CCG010025.1 | 3126  | 682   | 4895 | 9.37471497 | 54.74112758 | 2.545778419  | Up   | 1.08E-12 | 2.66E-12 | AAEL003359-PA (Fragment) OS=Aedes aegypti GN=AAEL003359 PE=4 SV=1 |
| CCG003146.1 | 3296  | 622   | 4906 | 8.10897298 | 52.03437677 | 2.681873952  | Up   | 0        | 0        | AAEL013275-PA OS=Aedes aegypti GN=AAEL013275 PE=4 SV=1            |
| CCG002418.1 | 1533  | 1928  | 4909 | 54.0415188 | 111.9440187 | 1.050637319  | Up   | 0        | 0        | AAEL002023-PA OS=Aedes aegypti GN=AAEL002023 PE=3 SV=1            |
| CCG023790.1 | 23208 | 1244  | 4913 | 2.30327257 | 7.400465951 | 1.683930957  | Up   | 1.32E-12 | 3.20E-12 | AAEL002729-PA OS=Aedes aegypti GN=AAEL002729 PE=4 SV=1            |



|             |      |       |      |            |             |              |      |          |          |                                                                                 |
|-------------|------|-------|------|------------|-------------|--------------|------|----------|----------|---------------------------------------------------------------------------------|
| CCG018231.1 | 2061 | 105   | 4914 | 2.18914223 | 83.35030182 | 5.250749829  | Up   | 0        | 0        | AAEL001666-PA OS=Aedes aegypti GN=AAEL001666 PE=4 SV=1                          |
| CCG006265.1 | 1456 | 1794  | 4941 | 52.9448516 | 118.6324489 | 1.163936369  | Up   | 0        | 0        | Methionine aminopeptidase OS=Aedes aegypti GN=AAEL004738 PE=3 SV=1              |
| CCG009035.1 | 1455 | 451   | 4942 | 13.3191411 | 118.7380095 | 3.156208876  | Up   | 1.51E-12 | 3.65E-12 | AAEL000672-PA OS=Aedes aegypti GN=AAEL000672 PE=3 SV=1                          |
| CCG008035.1 | 1698 | 1048  | 4942 | 26.5207785 | 101.7454675 | 1.939769498  | Up   | 3.41E-12 | 7.95E-12 | Tripe functional domain OS=Culex quinquefasciatus GN=CpipJ_CPIJ002249 PE=4 SV=1 |
| CCG023748.1 | 7032 | 698   | 4943 | 4.26519834 | 24.5732028  | 2.526401169  | Up   | 0        | 0        | AAEL009265-PA OS=Aedes aegypti GN=AAEL009265 PE=4 SV=1                          |
| CCG025300.1 | 1605 | 1245  | 4957 | 33.3316633 | 107.9677121 | 1.69563472   | Up   | 4.85E-12 | 1.11E-11 | AAEL006389-PA (Fragment) OS=Aedes aegypti GN=AAEL006389 PE=3 SV=1               |
| CCG017883.2 | 5333 | 1485  | 4959 | 11.9651333 | 32.50667439 | 1.441899498  | Up   | 0        | 0        | AAEL005557-PA OS=Aedes aegypti GN=AAEL005557 PE=4 SV=1                          |
| CCG002465.1 | 2126 | 1566  | 4961 | 31.6512721 | 81.57479354 | 1.365859948  | Up   | 3.46E-13 | 9.36E-13 | AAEL010063-PA OS=Aedes aegypti GN=AAEL010063 PE=3 SV=1                          |
| CCG001172.1 | 5071 | 518   | 4965 | 4.38933594 | 34.2275378  | 2.963082919  | Up   | 0        | 0        | AAEL009392-PA OS=Aedes aegypti GN=AAEL009392 PE=4 SV=1                          |
| CCG027635.1 | 3780 | 302   | 4979 | 3.43303171 | 46.04689419 | 3.745548765  | Up   | 4.59E-13 | 1.20E-12 | AAEL003382-PA OS=Aedes aegypti GN=AAEL003382 PE=4 SV=1                          |
| CCG002823.1 | 714  | 1112  | 4983 | 66.9220517 | 243.9735198 | 1.86617099   | Up   | 5.39E-12 | 1.22E-11 | AAEL004284-PA OS=Aedes aegypti GN=AAEL004284 PE=4 SV=1                          |
| CCG005015.1 | 231  | 35007 | 4983 | 6511.86796 | 754.0999704 | -3.110243749 | Down | 0        | 0        | AAEL014039-PA OS=Aedes aegypti GN=AAEL014039 PE=4 SV=1                          |
| CCG019032.1 | 2703 | 1250  | 4991 | 19.8713164 | 64.54930054 | 1.699714013  | Up   | 5.51E-13 | 1.42E-12 | AAEL010599-PA OS=Aedes aegypti GN=AAEL010599 PE=4 SV=1                          |
| CCG014378.1 | 1500 | 921   | 4993 | 26.3834171 | 116.3644506 | 2.140947049  | Up   | 0        | 0        | AAEL011314-PA OS=Aedes aegypti GN=AAEL011314 PE=2 SV=1                          |
| CCG002723.1 | 3909 | 488   | 4995 | 5.36434651 | 44.67039971 | 3.057844829  | Up   | 9.43E-13 | 2.34E-12 | AAEL014733-PA OS=Aedes aegypti GN=AAEL014733 PE=4 SV=1                          |

|             |       |      |      |            |             |             |    |          |          |                                                                                                              |
|-------------|-------|------|------|------------|-------------|-------------|----|----------|----------|--------------------------------------------------------------------------------------------------------------|
| CCG010190.1 | 1539  | 745  | 5003 | 20.8008137 | 113.6427932 | 2.449794325 | Up | 0        | 0        | O-acyltransferase (Fragment)<br>OS=Aedes aegypti<br>GN=AAEL001204 PE=3 SV=1                                  |
| CCG015641.1 | 3954  | 1102 | 5013 | 11.9758846 | 44.32115363 | 1.887863214 | Up | 3.03E-12 | 7.09E-12 | AAEL012607-PA OS=Aedes<br>aegypti GN=AAEL012607 PE=4<br>SV=1                                                 |
| CCG001217.1 | 3708  | 1325 | 5017 | 15.3546112 | 47.29926499 | 1.623145782 | Up | 1.87E-12 | 4.48E-12 | Ubiquitin carboxyl-terminal<br>hydrolase OS=Aedes aegypti<br>GN=AAEL004980 PE=3 SV=1                         |
| CCG001811.1 | 4932  | 800  | 5022 | 6.96994884 | 35.59620153 | 2.352503327 | Up | 9.48E-13 | 2.35E-12 | AAEL005801-PA OS=Aedes<br>aegypti GN=AAEL005801 PE=3<br>SV=1                                                 |
| CCG022370.1 | 3321  | 1309 | 5025 | 16.9368812 | 52.8953149  | 1.642971703 | Up | 2.04E-12 | 4.87E-12 | AAEL005320-PA (Fragment)<br>OS=Aedes aegypti<br>GN=AAEL005320 PE=4 SV=1                                      |
| CCG002373.1 | 2755  | 207  | 5031 | 3.22857897 | 63.83850833 | 4.305455721 | Up | 6.88E-15 | 2.47E-14 | AAEL014051-PA OS=Aedes<br>aegypti GN=AAEL014051 PE=4<br>SV=1                                                 |
| CCG010564.2 | 1167  | 1611 | 5033 | 59.3181169 | 150.7669297 | 1.345775308 | Up | 0        | 0        | Importin subunit alpha OS=Aedes<br>aegypti GN=AAEL011657 PE=3<br>SV=1                                        |
| CCG025081.1 | 1375  | 10   | 5034 | 0.31250716 | 127.9854293 | 8.67787461  | Up | 5.43E-07 | 1.01E-06 | AAEL001401-PA OS=Aedes<br>aegypti GN=AAEL001401 PE=4<br>SV=1                                                 |
| CCG020033.1 | 4326  | 460  | 5034 | 4.56913498 | 40.67960362 | 3.154312654 | Up | 0        | 0        | Condensin complex subunit 1<br>OS=Aedes aegypti<br>GN=AAEL004634 PE=3 SV=1                                   |
| CCG005153.1 | 8153  | 745  | 5038 | 3.92646293 | 21.60183961 | 2.459851995 | Up | 0        | 0        | histone-lysine N-<br>methyltransferase ash1 OS=Culex<br>quinquefasciatus<br>GN=CpipJ_CPIJ001202 PE=4<br>SV=1 |
| CCG027231.1 | 6186  | 1002 | 5040 | 6.9601801  | 28.48201017 | 2.032854429 | Up | 3.07E-12 | 7.20E-12 | AAEL005712-PA OS=Aedes<br>aegypti GN=AAEL005712 PE=4<br>SV=1                                                 |
| CCG020413.1 | 4217  | 1159 | 5040 | 11.809799  | 41.78081929 | 1.822856371 | Up | 3.95E-12 | 9.12E-12 | AAEL002581-PA OS=Aedes<br>aegypti GN=AAEL002581 PE=4<br>SV=1                                                 |
| CCG003143.1 | 2010  | 555  | 5044 | 11.8647775 | 87.7261433  | 2.886321803 | Up | 0        | 0        | Putative uncharacterized protein<br>OS=Culex quinquefasciatus<br>GN=CpipJ_CPIJ014888 PE=4<br>SV=1            |
| CCG006337.1 | 21929 | 347  | 5051 | 0.67994427 | 8.052088831 | 3.565874678 | Up | 0        | 0        | AAEL007698-PA OS=Aedes<br>aegypti GN=PIWI4 PE=4 SV=1                                                         |

|             |      |       |      |            |             |              |      |          |          |                                                                                                                                               |
|-------------|------|-------|------|------------|-------------|--------------|------|----------|----------|-----------------------------------------------------------------------------------------------------------------------------------------------|
| CCG015097.3 | 5165 | 1132  | 5051 | 9.41756817 | 34.18669041 | 1.860008287  | Up   | 5.10E-12 | 1.16E-11 | AAEL000212-PA OS=Aedes aegypti GN=AAEL000212 PE=4 SV=1                                                                                        |
| CCG001435.1 | 2124 | 2054  | 5053 | 41.5535946 | 83.16580628 | 1.001017202  | Up   | 0        | 0        | AAEL010991-PA OS=Aedes aegypti GN=AAEL010991 PE=4 SV=1                                                                                        |
| CCG009699.2 | 3216 | 1254  | 5054 | 16.7549898 | 54.93754067 | 1.71320152   | Up   | 1.97E-12 | 4.69E-12 | AAEL003939-PA OS=Aedes aegypti GN=AAEL003939 PE=4 SV=1                                                                                        |
| CCG013833.1 | 609  | 431   | 5079 | 30.4104362 | 291.5485841 | 3.261097903  | Up   | 0        | 0        | AAEL002372-PB OS=Aedes aegypti GN=RpS11 PE=2 SV=1                                                                                             |
| CCG008130.1 | 2770 | 20920 | 5081 | 324.522328 | 64.12382826 | -2.339385279 | Down | 0        | 0        | AAEL004221-PA OS=Aedes aegypti GN=AAEL004221 PE=4 SV=1                                                                                        |
| CCG027463.1 | 2944 | 201   | 5084 | 2.93373528 | 60.36952415 | 4.363009828  | Up   | 0        | 0        | AAEL011838-PA OS=Aedes aegypti GN=AAEL011838 PE=4 SV=1                                                                                        |
| CCG019245.2 | 6177 | 1548  | 5084 | 10.7685202 | 28.77252373 | 1.417871763  | Up   | 3.12E-12 | 7.30E-12 | AGAP003873-PA OS=Anopheles gambiae GN=AgaP_AGAP003873 PE=4 SV=5                                                                               |
| CCG026313.1 | 3574 | 444   | 5085 | 5.33815394 | 49.73778326 | 3.219929396  | Up   | 6.43E-13 | 1.64E-12 | AAEL007201-PA (Fragment) OS=Aedes aegypti GN=AAEL007201 PE=4 SV=1                                                                             |
| CCG002282.1 | 2116 | 1661  | 5086 | 33.7300232 | 84.02542328 | 1.316792593  | Up   | 6.26E-12 | 1.41E-11 | AAEL004300-PA OS=Aedes aegypti GN=AAEL004300 PE=4 SV=1                                                                                        |
| CCG021083.1 | 5649 | 1569  | 5087 | 11.9347696 | 31.48039546 | 1.399282946  | Up   | 0        | 0        | AAEL004300-PA OS=Aedes aegypti GN=AAEL004300 PE=4 SV=1<br>DNA-directed RNA polymerase OS=Culex quinquefasciatus GN=CpipJ_CPIJ016666 PE=3 SV=1 |
| CCG023599.1 | 6642 | 1003  | 5096 | 6.48880515 | 26.82134574 | 2.047356875  | Up   | 3.57E-12 | 8.30E-12 | AAEL002709-PA OS=Aedes aegypti GN=AAEL002709 PE=4 SV=1                                                                                        |
| CCG014997.1 | 3111 | 110   | 5099 | 1.51934131 | 57.29741346 | 5.236952113  | Up   | 0        | 0        | AAEL002036-PA OS=Aedes aegypti GN=AAEL002036 PE=4 SV=1                                                                                        |
| CCG011971.1 | 2600 | 399   | 5101 | 6.59420158 | 68.58544993 | 3.378632653  | Up   | 0        | 0        | AAEL003071-PA OS=Aedes aegypti GN=AAEL003071 PE=4 SV=1                                                                                        |
| CCG021239.1 | 1248 | 520   | 5114 | 17.9040561 | 143.2505027 | 3.000181836  | Up   | 1.17E-12 | 2.86E-12 | AAEL003443-PA OS=Aedes aegypti GN=AAEL003443 PE=4 SV=1                                                                                        |
| CCG014780.2 | 2769 | 854   | 5119 | 13.2524931 | 64.62673124 | 2.285867235  | Up   | 1.02E-12 | 2.51E-12 | AAEL004946-PA (Fragment) OS=Aedes aegypti GN=AAEL004946 PE=4 SV=1                                                                             |

|             |       |       |      |            |             |              |      |          |          |                                                                                          |
|-------------|-------|-------|------|------------|-------------|--------------|------|----------|----------|------------------------------------------------------------------------------------------|
| CCG018850.1 | 1683  | 3     | 5120 | 0.07659489 | 106.3496002 | 10.4392788   | Up   | 5.28E-05 | 8.85E-05 | AAEL000335-PA OS=Aedes aegypti GN=AAEL000335 PE=4 SV=1                                   |
| CCG006613.1 | 6615  | 1266  | 5124 | 8.22368617 | 27.07879217 | 1.719306275  | Up   | 2.71E-12 | 6.37E-12 | AAEL010835-PA (Fragment) OS=Aedes aegypti GN=AAEL010835 PE=4 SV=1                        |
| CCG016109.1 | 1545  | 241   | 5135 | 6.70272236 | 116.1881885 | 4.115572429  | Up   | 2.37E-13 | 6.72E-13 | AAEL014365-PA (Fragment) OS=Aedes aegypti GN=AAEL014365 PE=4 SV=1                        |
| CCG026105.1 | 2586  | 731   | 5141 | 12.1465104 | 69.49748681 | 2.516418905  | Up   | 0        | 0        | Putative uncharacterized protein OS=Culex quinquefasciatus GN=CpipJ_CPIJ003815 PE=4 SV=1 |
| CCG008301.1 | 2383  | 1056  | 5143 | 19.041561  | 75.44709083 | 1.986313523  | Up   | 2.35E-12 | 5.56E-12 | AAEL010641-PA OS=Aedes aegypti GN=AAEL010641 PE=4 SV=1                                   |
| CCG002713.1 | 1770  | 226   | 5146 | 5.48653109 | 101.6357583 | 4.211369983  | Up   | 2.04E-14 | 7.16E-14 | AAEL008863-PA OS=Aedes aegypti GN=AAEL008863 PE=4 SV=1                                   |
| CCG001566.1 | 1440  | 843   | 5151 | 25.1551988 | 125.0486692 | 2.313561208  | Up   | 2.68E-12 | 6.30E-12 | AAEL011985-PA OS=Aedes aegypti GN=AAEL011985 PE=4 SV=1                                   |
| CCG015053.1 | 828   | 1609  | 5153 | 83.5003659 | 217.5603867 | 1.38156147   | Up   | 5.36E-12 | 1.22E-11 | AAEL013775-PA OS=Aedes aegypti GN=AAEL013775 PE=4 SV=1                                   |
| CCG016476.1 | 543   | 0     | 5157 | 0.001      | 332.0070595 | 18.34085439  | Up   | 4.44E-16 | 1.63E-15 | AAEL013262-PA OS=Aedes aegypti GN=AAEL013262 PE=4 SV=1                                   |
| CCG011662.1 | 4685  | 1056  | 5164 | 9.68538735 | 38.53245278 | 1.99219237   | Up   | 2.35E-12 | 5.56E-12 | AAEL011534-PA OS=Aedes aegypti GN=AAEL011534 PE=4 SV=1                                   |
| CCG007304.2 | 38717 | 721   | 5168 | 0.80019574 | 4.6662803   | 2.543848109  | Up   | 0        | 0        | AAEL012039-PA OS=Aedes aegypti GN=AAEL012039 PE=4 SV=1                                   |
| CCG002947.1 | 5415  | 17338 | 5173 | 137.582504 | 33.39596782 | -2.042551188 | Down | 0        | 0        | Histone H3 OS=Gecko japonicus PE=2 SV=1                                                  |
| CCG000431.1 | 2229  | 21520 | 5180 | 414.853606 | 81.23996127 | -2.352340871 | Down | 0        | 0        | Glucose-6-phosphate isomerase OS=Aedes aegypti GN=AAEL012994 PE=3 SV=1                   |
| CCG011703.1 | 3777  | 1983  | 5181 | 22.5599639 | 47.95309292 | 1.08785911   | Up   | 0        | 0        | AAEL012753-PA (Fragment) OS=Aedes aegypti GN=AAEL012753 PE=4 SV=1                        |
| CCG020159.1 | 11061 | 885   | 5194 | 3.43804494 | 16.41563055 | 2.255409858  | Up   | 0        | 0        | AAEL013275-PA OS=Aedes aegypti GN=AAEL013275 PE=4 SV=1                                   |

|             |       |       |      |            |             |              |      |          |          |                                                                                                   |
|-------------|-------|-------|------|------------|-------------|--------------|------|----------|----------|---------------------------------------------------------------------------------------------------|
| CCG020056.1 | 61404 | 1997  | 5199 | 1.39747508 | 2.959873639 | 1.082713026  | Up   | 0        | 0        | Putative uncharacterized protein<br>OS=Culex quinquefasciatus<br>GN=CpipJ_CPIJ008269 PE=4<br>SV=1 |
| CCG016099.1 | 4960  | 1357  | 5204 | 11.7560342 | 36.67799845 | 1.641513445  | Up   | 3.94E-12 | 9.11E-12 | Spastin OS=Culex<br>quinquefasciatus<br>GN=CpipJ_CPIJ012667 PE=2<br>SV=1                          |
| CCG025030.1 | 804   | 232   | 5205 | 12.3992269 | 226.3157097 | 4.190014657  | Up   | 2.91E-13 | 8.06E-13 | AAEL003389-PA OS=Aedes<br>aegypti GN=ATT PE=4 SV=1                                                |
| CCG015096.1 | 9027  | 1030  | 5211 | 4.90293859 | 20.18030135 | 2.041229121  | Up   | 4.77E-12 | 1.09E-11 | Putative uncharacterized protein<br>OS=Culex quinquefasciatus<br>GN=CpipJ_CPIJ000695 PE=4<br>SV=1 |
| CCG011550.1 | 4131  | 341   | 5221 | 3.54700545 | 44.18231978 | 3.638795718  | Up   | 2.98E-13 | 8.25E-13 | AAEL012336-PA OS=Aedes<br>aegypti GN=AAEL012336 PE=4<br>SV=1                                      |
| CCG011179.1 | 1515  | 862   | 5221 | 24.4487863 | 120.4733749 | 2.300879588  | Up   | 0        | 0        | Putative uncharacterized protein<br>OS=Culex quinquefasciatus<br>GN=CpipJ_CPIJ011773 PE=4<br>SV=1 |
| CCG005040.1 | 4962  | 748   | 5228 | 6.47750131 | 36.83229967 | 2.50746217   | Up   | 4.45E-13 | 1.17E-12 | Putative uncharacterized protein<br>OS=Culex quinquefasciatus<br>GN=CpipJ_CPIJ005688 PE=4<br>SV=1 |
| CCG012522.1 | 2493  | 2049  | 5228 | 35.3168818 | 73.31001643 | 1.053652361  | Up   | 0        | 0        | AAEL002621-PA OS=Aedes<br>aegypti GN=AAEL002621 PE=4<br>SV=1                                      |
| CCG023316.1 | 17029 | 1839  | 5232 | 4.64039826 | 10.74060157 | 1.210754265  | Up   | 0        | 0        | Saccharopine dehydrogenase<br>domain-containing protein<br>OS=Aedes aegypti PE=2 SV=1             |
| CCG016702.1 | 1738  | 704   | 5235 | 17.4054621 | 105.2972261 | 2.596855407  | Up   | 1.23E-12 | 3.00E-12 | AAEL009220-PA OS=Aedes<br>aegypti GN=AAEL009220 PE=4<br>SV=1                                      |
| CCG012377.1 | 3585  | 1282  | 5235 | 15.366025  | 51.04786022 | 1.732106479  | Up   | 3.23E-12 | 7.55E-12 | PTEN transcript variant 6<br>OS=Aedes aegypti PE=2 SV=1                                           |
| CCG006625.1 | 5045  | 462   | 5237 | 3.93498858 | 36.28870078 | 3.205089052  | Up   | 0        | 0        | AAEL009392-PA OS=Aedes<br>aegypti GN=AAEL009392 PE=4<br>SV=1                                      |
| CCG010008.1 | 11493 | 13587 | 5238 | 50.7987283 | 15.93243311 | -1.672825777 | Down | 0        | 0        | AGAP009638-PA (Fragment)<br>OS=Anopheles gambiae<br>GN=AGAP009638 PE=4 SV=4                       |
| CCG016017.1 | 4325  | 2119  | 5241 | 21.0526862 | 42.36215689 | 1.008771725  | Up   | 0        | 0        | Tyrosine-protein kinase shark<br>OS=Culex quinquefasciatus<br>GN=CpipJ_CPIJ011800 PE=4<br>SV=1    |

|             |       |       |      |            |             |              |      |          |          |                                                                                                                                |
|-------------|-------|-------|------|------------|-------------|--------------|------|----------|----------|--------------------------------------------------------------------------------------------------------------------------------|
| CCG000358.1 | 2076  | 203   | 5274 | 4.20176114 | 88.81018868 | 4.401659142  | Up   | 9.28E-14 | 2.93E-13 | AAEL007813-PA OS=Aedes aegypti GN=AAEL007813 PE=4 SV=1                                                                         |
| CCG009822.1 | 6621  | 1246  | 5279 | 8.08643548 | 27.87263904 | 1.785273801  | Up   | 2.10E-12 | 5.00E-12 | AAEL007586-PA OS=Aedes aegypti GN=AAEL007586 PE=4 SV=1                                                                         |
| CCG000112.1 | 360   | 1669  | 5280 | 199.212464 | 512.7213927 | 1.363867179  | Up   | 3.31E-12 | 7.71E-12 | AAEL000068-PA OS=Aedes aegypti GN=AAEL000068 PE=4 SV=1                                                                         |
| CCG012770.1 | 4590  | 11125 | 5283 | 104.147777 | 40.23629111 | -1.372062817 | Down | 0        | 0        | AAEL010382-PA OS=Aedes aegypti GN=AAEL010382 PE=4 SV=1                                                                         |
| CCG025614.1 | 4377  | 11406 | 5288 | 111.974593 | 42.23426264 | -1.406685652 | Down | 0        | 0        | Ckz1 OS=Culex quinquefasciatus GN=CpipJ_CPIJ008998 PE=4 SV=1                                                                   |
| CCG023890.1 | 1551  | 1611  | 5303 | 44.6320067 | 119.5253009 | 1.421165458  | Up   | 0        | 0        | AAEL002023-PA OS=Aedes aegypti GN=AAEL002023 PE=3 SV=1                                                                         |
| CCG027398.1 | 4977  | 1928  | 5306 | 16.6456999 | 37.26916145 | 1.162832828  | Up   | 0        | 0        | Steroid regulatory element-binding protein cleavage-activating protein OS=Culex quinquefasciatus GN=CpipJ_CPIJ013729 PE=4 SV=1 |
| CCG024115.1 | 1488  | 1862  | 5307 | 53.7699233 | 124.6798218 | 1.21335668   | Up   | 0        | 0        | AAEL003634-PA OS=Aedes aegypti GN=AAEL003634 PE=2 SV=1                                                                         |
| CCG004346.1 | 3680  | 508   | 5323 | 5.93169163 | 50.56600741 | 3.091652368  | Up   | 6.20E-13 | 1.58E-12 | AAEL010444-PA (Fragment) OS=Aedes aegypti GN=AAEL010444 PE=4 SV=1                                                              |
| CCG014654.1 | 2184  | 547   | 5332 | 10.7621084 | 85.3468552  | 2.987377246  | Up   | 0        | 0        | AAEL013905-PB (Fragment) OS=Aedes aegypti GN=AAEL013905 PE=4 SV=1                                                              |
| CCG027745.1 | 13689 | 12815 | 5335 | 40.2262509 | 13.62425353 | -1.561960099 | Down | 0        | 0        | AAEL009847-PA OS=Aedes aegypti GN=AAEL009847 PE=4 SV=1                                                                         |
| CCG011536.1 | 3932  | 530   | 5341 | 5.79195304 | 47.48528897 | 3.035358823  | Up   | 0        | 0        | AAEL001099-PA OS=Aedes aegypti GN=AAEL001099 PE=4 SV=1                                                                         |
| CCG013339.1 | 17750 | 49087 | 5368 | 118.831288 | 10.57217069 | -3.490571217 | Down | 0        | 0        | Fructose-bisphosphate aldolase OS=Aedes aegypti GN=AAEL005766 PE=3 SV=1                                                        |
| CCG027495.1 | 9020  | 12535 | 5369 | 59.7145924 | 20.80831352 | -1.520923482 | Down | 0        | 0        | AGAP003857-PA OS=Anopheles gambiae GN=AgaP_AGAP003857 PE=3 SV=5                                                                |

|             |      |       |      |            |             |              |      |          |          |                                                                                                   |
|-------------|------|-------|------|------------|-------------|--------------|------|----------|----------|---------------------------------------------------------------------------------------------------|
| CCG018028.1 | 4049 | 21399 | 5373 | 227.095419 | 46.3894347  | -2.291430432 | Down | 0        | 0        | Putative uncharacterized protein<br>OS=Culex quinquefasciatus<br>GN=CpipJ_CPIJ000251 PE=4<br>SV=1 |
| CCG023263.1 | 2477 | 621   | 5374 | 10.7727918 | 75.84407726 | 2.815644352  | Up   | 0        | 0        | AAEL007158-PA OS=Aedes<br>aegypti GN=AAEL007158 PE=4<br>SV=1                                      |
| CCG021632.2 | 5619 | 39455 | 5375 | 301.721103 | 33.44024518 | -3.173558276 | Down | 0        | 0        | EF1r domain-binding protein<br>OS=Culex quinquefasciatus<br>GN=CpipJ_CPIJ012054 PE=4<br>SV=1      |
| CCG002698.1 | 3615 | 375   | 5386 | 4.45744135 | 52.08444777 | 3.546564933  | Up   | 0        | 0        | TSC1 OS=Culex quinquefasciatus<br>GN=CpipJ_CPIJ000640 PE=4<br>SV=1                                |
| CCG019725.1 | 971  | 32    | 5392 | 1.41609836 | 194.124643  | 7.098917985  | Up   | 1.77E-13 | 5.16E-13 | AAEL013338-PA OS=Aedes<br>aegypti GN=AAEL013338 PE=3<br>SV=1                                      |
| CCG027793.1 | 1743 | 2073  | 5409 | 51.1051405 | 108.4849794 | 1.085954985  | Up   | 0        | 0        | AAEL003285-PA OS=Aedes<br>aegypti GN=AAEL003285 PE=2<br>SV=1                                      |
| CCG015622.2 | 4028 | 549   | 5413 | 5.85659988 | 46.97843897 | 3.003863538  | Up   | 2.32E-13 | 6.62E-13 | AAEL007863-PA OS=Aedes<br>aegypti GN=AAEL007863 PE=4<br>SV=1                                      |
| CCG000959.2 | 3828 | 1536  | 5414 | 17.2417744 | 49.44203512 | 1.519829875  | Up   | 2.61E-12 | 6.14E-12 | Uncharacterized protein<br>OS=Anopheles darlingi<br>GN=AND_15687 PE=4 SV=1                        |
| CCG015169.1 | 3296 | 1654  | 5415 | 21.5630889 | 57.43296988 | 1.413315307  | Up   | 2.93E-12 | 6.87E-12 | AAEL003415-PA OS=Aedes<br>aegypti GN=AAEL003415 PE=4<br>SV=1                                      |
| CCG000936.1 | 1488 | 708   | 5440 | 20.445277  | 127.8044527 | 2.64409859   | Up   | 9.24E-13 | 2.30E-12 | AAEL008578-PA OS=Aedes<br>aegypti GN=AAEL008578 PE=4<br>SV=1                                      |
| CCG018534.1 | 942  | 1927  | 5441 | 87.9009327 | 201.9193035 | 1.199828461  | Up   | 0        | 0        | AAEL002160-PA OS=Aedes<br>aegypti GN=AAEL002160 PE=4<br>SV=1                                      |
| CCG028185.1 | 1411 | 1360  | 5442 | 41.4166117 | 134.8284495 | 1.702843509  | Up   | 1.23E-12 | 3.01E-12 | Insulin-like peptide 6 splice variant<br>A OS=Aedes aegypti PE=2 SV=1                             |
| CCG016240.1 | 3769 | 579   | 5445 | 6.60108154 | 50.5035333  | 2.935609999  | Up   | 7.33E-13 | 1.84E-12 | AAEL004348-PA OS=Aedes<br>aegypti GN=AAEL004348 PE=4<br>SV=1                                      |
| CCG024762.1 | 3161 | 11498 | 5448 | 156.300541 | 60.25077249 | -1.375271124 | Down | 0        | 0        | AAEL006446-PA OS=Aedes<br>aegypti GN=AAEL006446 PE=4<br>SV=1                                      |
| CCG004456.1 | 4435 | 707   | 5452 | 6.84996671 | 42.97463922 | 2.649316646  | Up   | 0        | 0        | AAEL002369-PA OS=Aedes<br>aegypti GN=AAEL002369 PE=4<br>SV=1                                      |

|             |       |      |      |            |             |             |    |          |          |                                                                                                   |
|-------------|-------|------|------|------------|-------------|-------------|----|----------|----------|---------------------------------------------------------------------------------------------------|
| CCG025456.1 | 1434  | 1090 | 5468 | 32.6617927 | 133.2997611 | 2.028998312 | Up | 4.87E-12 | 1.11E-11 | Putative uncharacterized protein<br>OS=Culex quinquefasciatus<br>GN=CpipJ_CPIJ007053 PE=4<br>SV=1 |
| CCG015235.1 | 35415 | 1194 | 5479 | 1.44870431 | 5.408341054 | 1.900422971 | Up | 1.96E-12 | 4.67E-12 | AAEL009265-PA OS=Aedes<br>aegypti GN=AAEL009265 PE=4<br>SV=1                                      |
| CCG011740.1 | 843   | 14   | 5517 | 0.71361362 | 228.7838825 | 8.324626547 | Up | 3.07E-08 | 6.00E-08 | Salivary antigen-5 related protein<br>AG5-4 OS=Aedes albopictus<br>PE=2 SV=1                      |
| CCG001970.1 | 1833  | 466  | 5523 | 10.9241115 | 105.3325492 | 3.269363471 | Up | 0        | 0        | AAEL007799-PA OS=Aedes<br>aegypti GN=AAEL007799 PE=4<br>SV=1                                      |
| CCG021203.1 | 1762  | 918  | 5528 | 22.387183  | 109.6761373 | 2.292504761 | Up | 1.42E-12 | 3.43E-12 | AAEL011892-PA OS=Aedes<br>aegypti GN=AAEL011892 PE=4<br>SV=1                                      |
| CCG028336.1 | 7578  | 958  | 5529 | 5.43217284 | 25.50597945 | 2.231234214 | Up | 1.10E-12 | 2.71E-12 | AAEL000295-PA OS=Aedes<br>aegypti GN=AAEL000295 PE=4<br>SV=1                                      |
| CCG015998.1 | 1755  | 868  | 5531 | 21.2522676 | 110.1733498 | 2.374086598 | Up | 0        | 0        | Uncharacterized protein<br>OS=Anopheles darlingi<br>GN=AND_03313 PE=4 SV=1                        |
| CCG022499.1 | 2466  | 531  | 5533 | 9.25260709 | 78.4363931  | 3.083591361 | Up | 2.40E-13 | 6.76E-13 | Putative uncharacterized protein<br>OS=Culex quinquefasciatus<br>GN=CpipJ_CPIJ000842 PE=4<br>SV=1 |
| CCG013110.1 | 1314  | 934  | 5554 | 30.5431751 | 147.7612399 | 2.274345926 | Up | 3.46E-13 | 9.35E-13 | AAEL012312-PA OS=Aedes<br>aegypti GN=AAEL012312 PE=4<br>SV=1                                      |
| CCG001881.1 | 4115  | 410  | 5555 | 4.28131013 | 47.19154981 | 3.462404301 | Up | 1.25E-12 | 3.04E-12 | AAEL002714-PA OS=Aedes<br>aegypti GN=AAEL002714 PE=3<br>SV=1                                      |
| CCG025171.1 | 2140  | 1416 | 5557 | 28.4323104 | 90.7771701  | 1.674798179 | Up | 1.35E-12 | 3.28E-12 | AAEL005947-PB OS=Aedes<br>aegypti GN=AAEL005947 PE=4<br>SV=1                                      |
| CCG003699.1 | 9903  | 1914 | 5562 | 8.30496537 | 19.63424572 | 1.241326119 | Up | 0        | 0        | Lysosomal trafficking regulator<br>OS=Culex quinquefasciatus<br>GN=CpipJ_CPIJ005368 PE=4<br>SV=1  |
| CCG011072.1 | 2904  | 508  | 5575 | 7.51674421 | 67.11170558 | 3.158384607 | Up | 6.20E-13 | 1.58E-12 | AAEL001891-PA OS=Aedes<br>aegypti GN=AAEL001891 PE=4<br>SV=1                                      |
| CCG004169.1 | 4983  | 1273 | 5575 | 10.9774177 | 39.11145756 | 1.83305259  | Up | 4.95E-12 | 1.13E-11 | Conductor enhancer of ksr<br>OS=Culex quinquefasciatus<br>GN=CpipJ_CPIJ001765 PE=4<br>SV=1        |



|             |       |       |      |            |             |              |      |          |          |                                                                                 |
|-------------|-------|-------|------|------------|-------------|--------------|------|----------|----------|---------------------------------------------------------------------------------|
| CCG011096.1 | 5973  | 9488  | 5577 | 68.2566285 | 32.64060096 | -1.064301535 | Down | 0        | 0        | AAEL005175-PA OS=Aedes aegypti GN=AAEL005175 PE=4 SV=1                          |
| CCG017499.1 | 15195 | 1676  | 5584 | 4.73953769 | 12.84679286 | 1.438589996  | Up   | 1.21E-12 | 2.96E-12 | AAEL008015-PA OS=Aedes aegypti GN=AAEL008015 PE=4 SV=1                          |
| CCG019244.1 | 4559  | 1426  | 5595 | 13.4404127 | 42.90229404 | 1.674477353  | Up   | 2.31E-12 | 5.48E-12 | AGAP003872-PA OS=Anopheles gambiae GN=AgaP_AGAP003872 PE=4 SV=4                 |
| CCG021178.1 | 2370  | 917   | 5598 | 16.6258425 | 82.57233476 | 2.312231052  | Up   | 0        | 0        | AAEL002370-PA OS=Aedes aegypti GN=AAEL002370 PE=4 SV=1                          |
| CCG000436.1 | 3025  | 16104 | 5619 | 228.755242 | 64.93572138 | -1.816720568 | Down | 0        | 0        | AAEL008953-PA OS=Aedes aegypti GN=AAEL008953 PE=4 SV=1                          |
| CCG009103.1 | 1203  | 958   | 5625 | 34.2186249 | 163.4582767 | 2.256068739  | Up   | 1.10E-12 | 2.71E-12 | AAEL013408-PA OS=Aedes aegypti GN=AAEL013408 PE=4 SV=1                          |
| CCG017045.1 | 3093  | 632   | 5637 | 8.78010743 | 63.71154419 | 2.859244308  | Up   | 0        | 0        | AAEL008806-PA OS=Aedes aegypti GN=AAEL008806 PE=4 SV=1                          |
| CCG028581.1 | 1805  | 21312 | 5652 | 507.352346 | 109.4649198 | -2.212519413 | Down | 0        | 0        | AAEL011381-PA OS=Aedes aegypti GN=AAEL011381 PE=3 SV=1                          |
| CCG027266.1 | 3369  | 1120  | 5666 | 14.2849815 | 58.79299382 | 2.041145073  | Up   | 3.68E-12 | 8.54E-12 | AAEL001069-PA OS=Aedes aegypti GN=AAEL001069 PE=4 SV=1                          |
| CCG025794.2 | 1827  | 816   | 5688 | 19.191737  | 108.8356203 | 2.503593611  | Up   | 2.12E-12 | 5.04E-12 | Zinc finger protein 595 OS=Culex quinquefasciatus GN=CpipJ_CPIJ008058 PE=4 SV=1 |
| CCG022430.1 | 4482  | 20601 | 5694 | 197.505467 | 44.41151895 | -2.152886767 | Down | 0        | 0        | AAEL009838-PA OS=Aedes aegypti GN=AAEL009838 PE=4 SV=1                          |
| CCG008920.1 | 2661  | 548   | 5697 | 8.84908477 | 74.84302998 | 3.080267812  | Up   | 9.78E-13 | 2.42E-12 | AAEL012918-PA OS=Aedes aegypti GN=AAEL012918 PE=4 SV=1                          |
| CCG022974.1 | 1560  | 1019  | 5700 | 28.068051  | 127.7321651 | 2.186121072  | Up   | 3.75E-12 | 8.69E-12 | AAEL002527-PA OS=Aedes aegypti GN=AAEL002527 PE=4 SV=1                          |
| CCG024593.1 | 2478  | 2043  | 5708 | 35.4266214 | 80.5253607  | 1.184609335  | Up   | 0        | 0        | AAEL003812-PA (Fragment) OS=Aedes aegypti GN=AAEL003812 PE=4 SV=1               |
| CCG026441.1 | 2041  | 1894  | 5709 | 39.8749032 | 97.78383248 | 1.294114935  | Up   | 0        | 0        | AAEL011180-PA OS=Aedes aegypti GN=AAEL011180 PE=4 SV=1                          |
| CCG019516.1 | 2313  | 1733  | 5737 | 32.1947904 | 86.7080129  | 1.429338067  | Up   | 1.05E-12 | 2.59E-12 | AAEL008854-PA OS=Aedes aegypti GN=AAEL008854 PE=4 SV=1                          |

|             |      |       |      |            |             |              |      |          |          |                                                                      |
|-------------|------|-------|------|------------|-------------|--------------|------|----------|----------|----------------------------------------------------------------------|
| CCG013789.1 | 2433 | 402   | 5738 | 7.09980818 | 82.44578386 | 3.537593765  | Up   | 0        | 0        | AAEL009084-PA OS=Aedes aegypti GN=AAEL009084 PE=4 SV=1               |
| CCG016307.1 | 5076 | 2173  | 5739 | 18.395042  | 39.52434011 | 1.103424404  | Up   | 0        | 0        | AAEL013896-PA (Fragment) OS=Aedes aegypti GN=AAEL013896 PE=4 SV=1    |
| CCG000546.1 | 2427 | 1559  | 5740 | 27.601902  | 82.67841313 | 1.582743013  | Up   | 6.25E-12 | 1.41E-11 | AAEL001715-PA OS=Aedes aegypti GN=AAEL001715 PE=3 SV=1               |
| CCG019832.1 | 451  | 13316 | 5757 | 1268.70285 | 446.2412403 | -1.507458454 | Down | 0        | 0        | AAEL014937-PA OS=Aedes aegypti GN=AAEL014937 PE=4 SV=1               |
| CCG013129.1 | 3159 | 13824 | 5766 | 188.038497 | 63.80798476 | -1.559219177 | Down | 0        | 0        | AAEL000644-PA OS=Aedes aegypti GN=AAEL006446 PE=4 SV=1               |
| CCG001350.1 | 3714 | 384   | 5772 | 4.44275124 | 54.32934128 | 3.612206288  | Up   | 1.03E-12 | 2.55E-12 | AAEL011287-PA OS=Aedes aegypti GN=AAEL011287 PE=4 SV=1               |
| CCG013093.1 | 4650 | 1146  | 5794 | 10.5899604 | 43.55876465 | 2.040265844  | Up   | 4.08E-12 | 9.43E-12 | AAEL003733-PA OS=Aedes aegypti GN=AAEL003733 PE=4 SV=1               |
| CCG027748.1 | 1483 | 660   | 5810 | 19.1234153 | 136.9572408 | 2.840313438  | Up   | 0        | 0        | Uncharacterized protein OS=Anopheles darlingi GN=AND_10459 PE=3 SV=1 |
| CCG019953.1 | 2883 | 42723 | 5810 | 636.765859 | 70.45008257 | -3.176089684 | Down | 0        | 0        | Pyruvate kinase OS=Aedes aegypti GN=AAEL012576 PE=3 SV=1             |
| CCG011270.1 | 5793 | 762   | 5814 | 5.65215567 | 35.08500279 | 2.633981372  | Up   | 5.84E-13 | 1.50E-12 | AAEL000832-PA OS=Aedes aegypti GN=AAEL000832 PE=4 SV=1               |
| CCG028285.1 | 7677 | 1369  | 5817 | 7.66257219 | 26.48851061 | 1.789466061  | Up   | 3.82E-12 | 8.84E-12 | AAEL009959-PA OS=Aedes aegypti GN=AAEL009959 PE=4 SV=1               |
| CCG013802.1 | 7643 | 1452  | 5817 | 8.16329382 | 26.60634515 | 1.704547055  | Up   | 3.53E-12 | 8.22E-12 | AAEL009959-PA OS=Aedes aegypti GN=AAEL009959 PE=4 SV=1               |
| CCG008283.1 | 5661 | 1382  | 5818 | 10.49005   | 35.9277962  | 1.776078885  | Up   | 5.79E-12 | 1.31E-11 | AAEL000815-PA OS=Aedes aegypti GN=AAEL000815 PE=4 SV=1               |
| CCG026148.1 | 1653 | 564   | 5819 | 14.6611799 | 123.0624395 | 3.069317382  | Up   | 9.30E-13 | 2.31E-12 | NMD protein OS=Aedes aegypti PE=2 SV=1                               |
| CCG018663.1 | 3673 | 29412 | 5828 | 344.085444 | 55.4687822  | -2.633018904 | Down | 0        | 0        | AAEL005422-PA OS=Aedes aegypti GN=AAEL005422 PE=3 SV=1               |
| CCG028519.2 | 7646 | 874   | 5829 | 4.91179022 | 26.65077103 | 2.439856421  | Up   | 0        | 0        | AGAP001710-PA OS=Anopheles gambiae GN=AgaP_AGAP001710 PE=4 SV=2      |

|             |       |       |      |            |             |              |      |          |          |                                                                                            |
|-------------|-------|-------|------|------------|-------------|--------------|------|----------|----------|--------------------------------------------------------------------------------------------|
| CCG009106.1 | 22569 | 11800 | 5829 | 22.4663418 | 9.028835806 | -1.315153349 | Down | 0        | 0        | AAEL014026-PA OS=Aedes aegypti GN=AAEL014026 PE=4 SV=1                                     |
| CCG009105.1 | 48632 | 1909  | 5830 | 1.6867335  | 4.190795229 | 1.312991985  | Up   | 0        | 0        | AAEL014030-PA OS=Aedes aegypti GN=AAEL014030 PE=4 SV=1                                     |
| CCG024911.1 | 8430  | 1275  | 5851 | 6.49898121 | 24.26344928 | 1.900499175  | Up   | 4.14E-12 | 9.55E-12 | AAEL011479-PA OS=Aedes aegypti GN=AAEL011479 PE=4 SV=1                                     |
| CCG015539.1 | 2088  | 2056  | 5854 | 42.3111946 | 98.01041773 | 1.211895685  | Up   | 0        | 0        | AAEL012821-PA OS=Aedes aegypti GN=AAEL012821 PE=4 SV=1                                     |
| CCG012672.1 | 1819  | 43    | 5856 | 1.01577712 | 112.5429735 | 6.791748287  | Up   | 8.46E-14 | 2.71E-13 | AAEL001414-PB OS=Aedes aegypti GN=AAEL001414 PE=4 SV=1                                     |
| CCG018861.1 | 4161  | 807   | 5856 | 8.33371205 | 49.1986707  | 2.561588179  | Up   | 9.50E-13 | 2.36E-12 | AAEL011879-PA OS=Aedes aegypti GN=AAEL011879 PE=4 SV=1                                     |
| CCG007733.2 | 8303  | 265   | 5870 | 1.37142956 | 24.7145712  | 4.171609442  | Up   | 4.94E-13 | 1.28E-12 | AAEL004799-PA OS=Aedes aegypti GN=AAEL004799 PE=4 SV=1                                     |
| CCG025144.1 | 2796  | 72    | 5873 | 1.10651677 | 73.42988537 | 6.052270125  | Up   | 0        | 0        | AAEL004831-PA OS=Aedes aegypti GN=AAEL004831 PE=4 SV=1                                     |
| CCG026609.1 | 5848  | 13478 | 5880 | 99.0331879 | 35.14956693 | -1.494405167 | Down | 0        | 0        | -                                                                                          |
| CCG013218.2 | 3855  | 1739  | 5881 | 19.3837532 | 53.3306422  | 1.460116762  | Up   | 4.99E-12 | 1.13E-11 | AAEL003768-PA OS=Aedes aegypti GN=AAEL003768 PE=4 SV=1                                     |
| CCG012125.1 | 1620  | 82    | 5898 | 2.17501126 | 127.2740225 | 5.870771306  | Up   | 0        | 0        | AAEL002554-PB OS=Aedes aegypti GN=AAEL002554 PE=4 SV=1                                     |
| CCG007786.1 | 3132  | 2405  | 5930 | 32.9955976 | 66.18856362 | 1.004308415  | Up   | 0        | 0        | AAEL014721-PA OS=Aedes aegypti GN=AAEL014721 PE=4 SV=1                                     |
| CCG002982.1 | 1951  | 1283  | 5933 | 28.2573908 | 106.3082809 | 1.911553816  | Up   | 9.34E-13 | 2.32E-12 | T-complex protein 1 subunit delta OS=Aedes aegypti GN=AAEL007702 PE=3 SV=1                 |
| CCG001971.1 | 13387 | 615   | 5939 | 1.97403352 | 15.50886724 | 2.973874921  | Up   | 0        | 0        | AAEL007813-PA OS=Aedes aegypti GN=AAEL007813 PE=4 SV=1                                     |
| CCG002537.1 | 2897  | 266   | 5940 | 3.94544336 | 71.6783445  | 4.183277984  | Up   | 4.09E-14 | 1.40E-13 | AAEL001939-PA OS=Aedes aegypti GN=AAEL001939 PE=4 SV=1                                     |
| CCG000265.1 | 11685 | 1463  | 5945 | 5.37995051 | 17.78578994 | 1.725060244  | Up   | 0        | 0        | Transcription-associated protein 1 OS=Culex quinquefasciatus GN=CpipJ_CPIJ013348 PE=4 SV=1 |
| CCG008116.1 | 14590 | 973   | 5949 | 2.86563069 | 14.25406364 | 2.314448672  | Up   | 3.18E-12 | 7.44E-12 | AAEL001861-PA OS=Aedes aegypti GN=AAEL001861 PE=4 SV=1                                     |

|             |       |       |      |            |             |              |      |          |          |                                                                              |
|-------------|-------|-------|------|------------|-------------|--------------|------|----------|----------|------------------------------------------------------------------------------|
| CCG020441.1 | 1626  | 1070  | 5949 | 28.2765166 | 127.9008539 | 2.177349585  | Up   | 1.81E-12 | 4.33E-12 | AAEL002178-PA (Fragment)<br>OS=Aedes aegypti<br>GN=AAEL002178 PE=4 SV=1      |
| CCG014886.1 | 17494 | 1246  | 5963 | 3.06049442 | 11.91586855 | 1.961047472  | Up   | 2.10E-12 | 5.00E-12 | AAEL013172-PA OS=Aedes<br>aegypti GN=AAEL013172 PE=4<br>SV=1                 |
| CCG018108.1 | 3459  | 193   | 5986 | 2.39755964 | 60.4973243  | 4.65723273   | Up   | 6.08E-14 | 2.02E-13 | AAEL009475-PA (Fragment)<br>OS=Aedes aegypti<br>GN=AAEL009475 PE=3 SV=1      |
| CCG007789.1 | 3078  | 1949  | 6010 | 27.2085811 | 68.25836368 | 1.326944104  | Up   | 0        | 0        | AAEL002528-PA OS=Aedes<br>aegypti GN=AAEL002528 PE=4<br>SV=1                 |
| CCG011186.1 | 1919  | 1440  | 6012 | 32.2440948 | 109.5201459 | 1.764089401  | Up   | 1.98E-12 | 4.73E-12 | AAEL006946-PA OS=Aedes<br>aegypti GN=AAEL006946 PE=3<br>SV=1                 |
| CCG021758.1 | 27156 | 2410  | 6012 | 3.81341363 | 7.739326851 | 1.021125067  | Up   | 0        | 0        | AAEL002272-PA OS=Aedes<br>aegypti GN=AAEL002272 PE=4<br>SV=1                 |
| CCG015354.1 | 4201  | 1982  | 6015 | 20.2727955 | 50.05332892 | 1.303920979  | Up   | 0        | 0        | AAEL014597-PA OS=Aedes<br>aegypti GN=AAEL014597 PE=4<br>SV=1                 |
| CCG027585.1 | 8925  | 2102  | 6031 | 10.1201549 | 23.62278624 | 1.22294777   | Up   | 0        | 0        | AAEL014637-PA OS=Aedes<br>aegypti GN=AAEL014637 PE=4<br>SV=1                 |
| CCG020006.2 | 5399  | 638   | 6034 | 5.07773489 | 39.06987258 | 2.943799571  | Up   | 0        | 0        | Uncharacterized protein<br>OS=Anopheles darlingi<br>GN=AND_15518 PE=4 SV=1   |
| CCG004244.1 | 4007  | 25655 | 6045 | 275.115683 | 52.73840357 | -2.383112577 | Down | 0        | 0        | AAEL006721-PA OS=Aedes<br>aegypti GN=AAEL006721 PE=4<br>SV=1                 |
| CCG014463.1 | 936   | 11959 | 6058 | 549.011812 | 226.2577358 | -1.278870071 | Down | 0        | 0        | Activating transcription factor<br>OS=Aedes aegypti PE=2 SV=1                |
| CCG003010.1 | 4479  | 1243  | 6065 | 11.9248449 | 47.33689409 | 1.988994553  | Up   | 6.46E-12 | 1.45E-11 | AAEL000761-PA OS=Aedes<br>aegypti GN=AAEL000761 PE=4<br>SV=1                 |
| CCG000981.1 | 2034  | 1308  | 6079 | 27.6324547 | 104.4795302 | 1.918784682  | Up   | 4.37E-12 | 1.01E-11 | AAEL008849-PA OS=Aedes<br>aegypti GN=AAEL008849 PE=4<br>SV=1                 |
| CCG011398.1 | 43376 | 13241 | 6091 | 13.116983  | 4.908955732 | -1.41794787  | Down | 0        | 0        | AAEL005238-PA OS=Aedes<br>aegypti GN=AAEL005238 PE=4<br>SV=1                 |
| CCG012136.1 | 924   | 2117  | 6093 | 98.4490565 | 230.5203251 | 1.227444675  | Up   | 0        | 0        | Glutathione transferase OS=Culex<br>quinquefasciatus GN=CqGSTd1<br>PE=3 SV=1 |

|             |      |       |      |            |             |              |      |          |          |                                                                                                   |
|-------------|------|-------|------|------------|-------------|--------------|------|----------|----------|---------------------------------------------------------------------------------------------------|
| CCG001125.1 | 1968 | 351   | 6094 | 7.66380937 | 108.2498672 | 3.820159768  | Up   | 4.44E-15 | 1.60E-14 | AAEL005744-PA OS=Aedes aegypti GN=AAEL005744 PE=4 SV=1                                            |
| CCG004595.1 | 2039 | 18834 | 6097 | 396.906318 | 104.531934  | -1.92485478  | Down | 0        | 0        | Dihydrolipoyl dehydrogenase OS=Aedes aegypti GN=AAEL006928 PE=3 SV=1                              |
| CCG024716.2 | 3393 | 534   | 6103 | 6.76269917 | 62.87956473 | 3.216920147  | Up   | 0        | 0        | AAEL009381-PA OS=Aedes aegypti GN=AAEL009381 PE=4 SV=1                                            |
| CCG028326.3 | 7197 | 668   | 6106 | 3.98829828 | 29.65891871 | 2.894620786  | Up   | 9.28E-13 | 2.31E-12 | Putative uncharacterized protein OS=Culex quinquefasciatus GN=CpipJ_CPIJ007864 PE=4 SV=1          |
| CCG006090.1 | 1429 | 6     | 6135 | 0.18041876 | 150.0832946 | 9.700198332  | Up   | 8.38E-06 | 1.47E-05 | AAEL005922-PA OS=Aedes aegypti GN=AAEL005922 PE=4 SV=1                                            |
| CCG024982.1 | 1682 | 2342  | 6158 | 59.8306293 | 127.9863664 | 1.097033995  | Up   | 0        | 0        | Eukaryotic translation initiation factor 3 subunit E OS=Anopheles darlingi GN=AND_12720 PE=3 SV=1 |
| CCG007440.1 | 879  | 442   | 6165 | 21.6070793 | 245.1851835 | 3.504295824  | Up   | 0        | 0        | AAEL006301-PA OS=Aedes aegypti GN=AAEL006301 PE=4 SV=1                                            |
| CCG007802.1 | 1891 | 1553  | 6165 | 35.2892638 | 113.9702677 | 1.691356269  | Up   | 3.26E-12 | 7.62E-12 | AAEL005114-PA OS=Aedes aegypti GN=AAEL005114 PE=4 SV=1                                            |
| CCG016287.1 | 3477 | 1161  | 6182 | 14.3479614 | 62.15475036 | 2.115018886  | Up   | 3.30E-12 | 7.70E-12 | AAEL000682-PA OS=Aedes aegypti GN=AAEL000682 PE=4 SV=1                                            |
| CCG019403.1 | 7972 | 22660 | 6185 | 122.139261 | 27.12204489 | -2.170989157 | Down | 0        | 0        | PTANKL-interacting factor 1A OS=Culex quinquefasciatus GN=CpipJ_CPIJ011483 PE=4 SV=1              |
| CCG014786.2 | 1407 | 1673  | 6201 | 51.093366  | 154.0698467 | 1.592376648  | Up   | 3.18E-12 | 7.44E-12 | Eukaryotic translation initiation factor OS=Forcipomyia taiwana PE=2 SV=1                         |
| CCG028615.1 | 2643 | 883   | 6214 | 14.3557607 | 82.1909693  | 2.517350102  | Up   | 1.21E-13 | 3.73E-13 | Phosphatase 2C gamma OS=Culex quinquefasciatus GN=CpipJ_CPIJ017206 PE=3 SV=1                      |
| CCG004275.1 | 4783 | 644   | 6234 | 5.78559672 | 45.56343245 | 2.977338765  | Up   | 2.78E-13 | 7.74E-13 | AAEL011960-PA OS=Aedes aegypti GN=AAEL011960 PE=4 SV=1                                            |
| CCG001853.1 | 780  | 756   | 6235 | 41.6475889 | 279.4421227 | 2.746244624  | Up   | 0        | 0        | AAEL013533-PA OS=Aedes aegypti GN=AAEL013533 PE=4 SV=1                                            |

|             |      |       |      |            |             |              |      |          |          |                                                                                                           |
|-------------|------|-------|------|------------|-------------|--------------|------|----------|----------|-----------------------------------------------------------------------------------------------------------|
| CCG000247.1 | 2108 | 1414  | 6235 | 28.8231522 | 103.3988879 | 1.842920644  | Up   | 0        | 0        | Uncharacterized protein<br>OS=Anopheles darlingi<br>GN=AND_22097 PE=3 SV=1                                |
| CCG015398.1 | 5751 | 679   | 6237 | 5.07328287 | 37.91249734 | 2.901681983  | Up   | 0        | 0        | AAEL004290-PA (Fragment)<br>OS=Aedes aegypti<br>GN=AAEL004290 PE=3 SV=1                                   |
| CCG014631.1 | 4913 | 1571  | 6250 | 13.7401696 | 44.47165272 | 1.694486213  | Up   | 3.96E-12 | 9.15E-12 | AAEL004702-PA OS=Aedes<br>aegypti GN=AAEL004702 PE=4<br>SV=1                                              |
| CCG023214.2 | 7344 | 1302  | 6267 | 7.61800034 | 29.83163406 | 1.969358748  | Up   | 2.82E-12 | 6.61E-12 | AAEL000430-PA OS=Aedes<br>aegypti GN=AAEL000430 PE=4<br>SV=1                                              |
| CCG021436.1 | 4329 | 1457  | 6267 | 14.4622091 | 50.60834385 | 1.80708732   | Up   | 5.09E-12 | 1.16E-11 | AAEL004942-PA OS=Aedes<br>aegypti GN=AAEL004942 PE=4<br>SV=1                                              |
| CCG026419.1 | 1570 | 957   | 6276 | 26.1923796 | 139.7440414 | 2.415567726  | Up   | 1.76E-12 | 4.21E-12 | SZK active chromatin boundary<br>protein OS=Culex<br>quinquefasciatus<br>GN=CqipJ_CPIJ008624 PE=4<br>SV=1 |
| CCG003125.1 | 1288 | 66    | 6304 | 2.20186528 | 171.1001372 | 6.279970904  | Up   | 0        | 0        | AAEL007097-PA OS=Aedes<br>aegypti GN=AAEL007097 PE=4<br>SV=1                                              |
| CCG002171.1 | 943  | 149   | 6313 | 6.78949147 | 234.0313905 | 5.107254719  | Up   | 2.33E-13 | 6.62E-13 | -                                                                                                         |
| CCG022362.1 | 1401 | 1088  | 6321 | 33.3697868 | 157.7239597 | 2.240787462  | Up   | 2.82E-12 | 6.61E-12 | Uncharacterized protein<br>OS=Anopheles darlingi<br>GN=AND_23192 PE=4 SV=1                                |
| CCG015607.1 | 3657 | 609   | 6377 | 7.15574744 | 60.95951079 | 3.090676952  | Up   | 4.13E-13 | 1.09E-12 | Diastolemin specific protein z50<br>OS=Culex quinquefasciatus<br>GN=CqipJ_CPIJ004358 PE=4<br>SV=1         |
| CCG022684.1 | 7513 | 18247 | 6378 | 104.361606 | 29.6770783  | -1.814170083 | Down | 0        | 0        | AMPK-gamma subunit OS=Aedes<br>aegypti GN=AMPK-gamma PE=2<br>SV=1                                         |
| CCG024834.3 | 5790 | 890   | 6384 | 6.60501966 | 38.54466993 | 2.544896614  | Up   | 0        | 0        | AAEL009357-PA (Fragment)<br>OS=Aedes aegypti<br>GN=AAEL009357 PE=4 SV=1                                   |
| CCG013028.1 | 3241 | 1780  | 6394 | 23.5995457 | 68.96736244 | 1.547154707  | Up   | 0        | 0        | Histone deacetylase OS=Aedes<br>aegypti GN=AAEL004586 PE=3<br>SV=1                                        |
| CCG008775.1 | 1855 | 527   | 6395 | 12.2075742 | 120.5165391 | 3.303382696  | Up   | 8.05E-13 | 2.01E-12 | AAEL000739-PA OS=Aedes<br>aegypti GN=AAEL000739 PE=4<br>SV=1                                              |

|             |       |       |      |            |             |              |      |          |          |                                                                                          |
|-------------|-------|-------|------|------------|-------------|--------------|------|----------|----------|------------------------------------------------------------------------------------------|
| CCG025249.1 | 1809  | 1386  | 6397 | 32.9220852 | 123.6197327 | 1.90878143   | Up   | 5.95E-12 | 1.34E-11 | AAEL004697-PA OS=Aedes aegypti GN=AAEL004697 PE=4 SV=1                                   |
| CCG000344.1 | 5028  | 1646  | 6397 | 14.0668622 | 44.47655062 | 1.660744351  | Up   | 3.63E-12 | 8.44E-12 | AAEL003671-PA OS=Aedes aegypti GN=AAEL003671 PE=4 SV=1                                   |
| CCG006196.1 | 627   | 5     | 6402 | 0.34266136 | 356.9424049 | 10.02469207  | Up   | 1.59E-05 | 2.76E-05 | -                                                                                        |
| CCG027567.1 | 4581  | 575   | 6409 | 5.3934943  | 48.90801044 | 3.180778613  | Up   | 1.93E-13 | 5.56E-13 | AAEL000276-PA OS=Aedes aegypti GN=AAEL000276 PE=4 SV=1                                   |
| CCG016034.1 | 2634  | 1461  | 6434 | 23.83401   | 85.39162975 | 1.841072962  | Up   | 1.80E-12 | 4.32E-12 | AAEL002083-PA OS=Aedes aegypti GN=AAEL002083 PE=3 SV=1                                   |
| CCG015656.1 | 3543  | 1230  | 6436 | 14.9175201 | 63.50309605 | 2.089819214  | Up   | 3.75E-12 | 8.70E-12 | Neuronal protein a OS=Culex quinquefasciatus GN=CpipJ_CPIJ013227 PE=4 SV=1               |
| CCG027262.2 | 6575  | 1059  | 6451 | 6.92090478 | 34.2989876  | 2.309133431  | Up   | 4.65E-12 | 1.06E-11 | AAEL001322-PA OS=Aedes aegypti GN=AAEL001322 PE=4 SV=1                                   |
| CCG025556.1 | 3384  | 366   | 6466 | 4.64743584 | 66.79675461 | 3.845271158  | Up   | 0        | 0        | AAEL011023-PA OS=Aedes aegypti GN=AAEL011023 PE=4 SV=1                                   |
| CCG017111.1 | 2293  | 19217 | 6484 | 360.117484 | 98.85279834 | -1.865113932 | Down | 0        | 0        | AAEL000683-PA OS=Aedes aegypti GN=AAEL006834 PE=3 SV=1                                   |
| CCG003437.1 | 459   | 2470  | 6491 | 231.231469 | 494.3663933 | 1.096242918  | Up   | 0        | 0        | AAEL012585-PA OS=Aedes aegypti GN=AAEL012585 PE=2 SV=1                                   |
| CCG021496.1 | 3909  | 1322  | 6496 | 14.5321026 | 58.09387718 | 1.999142659  | Up   | 0        | 0        | AAEL010234-PA (Fragment) OS=Aedes aegypti GN=AAEL010234 PE=4 SV=1                        |
| CCG018436.1 | 12378 | 2184  | 6497 | 7.58166912 | 18.34900018 | 1.275114053  | Up   | 0        | 0        | Uncharacterized protein OS=Anopheles darlingi GN=AND_00689 PE=4 SV=1                     |
| CCG007316.1 | 4515  | 1330  | 6503 | 12.6577513 | 50.35075833 | 1.991992382  | Up   | 4.68E-12 | 1.07E-11 | AAEL009621-PA OS=Aedes aegypti GN=AAEL009621 PE=4 SV=1                                   |
| CCG012673.1 | 1506  | 158   | 6507 | 4.50811293 | 151.0448253 | 5.066309294  | Up   | 0        | 0        | AAEL001420-PA OS=Aedes aegypti GN=AAEL001420 PE=4 SV=1                                   |
| CCG007983.1 | 4521  | 2408  | 6509 | 22.8867775 | 50.33033035 | 1.136913726  | Up   | 0        | 0        | AAEL004984-PA OS=Aedes aegypti GN=AAEL004984 PE=4 SV=1                                   |
| CCG005088.1 | 2721  | 711   | 6522 | 11.2280343 | 83.79194455 | 2.89970618   | Up   | 0        | 0        | Putative uncharacterized protein OS=Culex quinquefasciatus GN=CpipJ_CPIJ008798 PE=4 SV=1 |

|             |       |        |      |            |             |              |      |          |          |                                                                                |
|-------------|-------|--------|------|------------|-------------|--------------|------|----------|----------|--------------------------------------------------------------------------------|
| CCG028463.2 | 8107  | 1835   | 6522 | 9.72609634 | 28.12358223 | 1.531847582  | Up   | 0        | 0        | AAEL009073-PA OS=Reedes aegypti GN=AAEL009073 PE=4 SV=1                        |
| CCG018564.1 | 1813  | 2172   | 6543 | 51.4783583 | 126.1621649 | 1.293241371  | Up   | 0        | 0        | Uncharacterized protein OS=Anopheles darlingi GN=AND_11769 PE=4 SV=1           |
| CCG008612.2 | 2542  | 607    | 6554 | 10.2606723 | 90.13239416 | 3.134920455  | Up   | 0        | 0        | AAEL010317-PA OS=Reedes aegypti GN=AAEL010317 PE=3 SV=1                        |
| CCG002938.1 | 38569 | 2534   | 6568 | 2.82313017 | 5.953121985 | 1.076350806  | Up   | 0        | 0        | AAEL003733-PA OS=Reedes aegypti GN=AAEL003733 PE=4 SV=1                        |
| CCG026319.1 | 13659 | 145093 | 6570 | 456.446863 | 16.81498487 | -4.762627534 | Down | 0        | 0        | AAEL002759-PB OS=Reedes aegypti GN=AAEL002759 PE=3 SV=1                        |
| CCG017011.1 | 29345 | 1263   | 6571 | 1.84940449 | 7.827937866 | 2.081571507  | Up   | 2.88E-12 | 6.75E-12 | -                                                                              |
| CCG014174.1 | 2556  | 1565   | 6578 | 26.3097162 | 89.96695798 | 1.773799555  | Up   | 1.11E-12 | 2.73E-12 | AAEL002834-PA OS=Reedes aegypti GN=AAEL002834 PE=4 SV=1                        |
| CCG027923.1 | 3450  | 967    | 6600 | 12.0439807 | 66.87670339 | 2.473191433  | Up   | 2.56E-13 | 7.18E-13 | AGAP003537-PB OS=Anopheles gambiae GN=AgaP_AGAP003537 PE=4 SV=1                |
| CCG016224.1 | 3954  | 759    | 6619 | 8.24836332 | 58.52019068 | 2.826754684  | Up   | 1.54E-12 | 3.70E-12 | AAEL006205-PB OS=Reedes aegypti GN=AAEL006205 PE=4 SV=1                        |
| CCG020172.1 | 1737  | 4      | 6623 | 0.09895161 | 133.2922666 | 10.39558235  | Up   | 2.95E-05 | 5.04E-05 | AAEL003404-PA OS=Reedes aegypti GN=AAEL003404 PE=4 SV=1                        |
| CCG018446.1 | 2481  | 16338  | 6626 | 282.966354 | 93.36297537 | -1.599708076 | Down | 0        | 0        | AAEL004739-PA OS=Reedes aegypti GN=AAEL004739 PE=3 SV=1                        |
| CCG013468.1 | 1695  | 1130   | 6646 | 28.6464897 | 137.0694439 | 2.258476724  | Up   | 2.84E-12 | 6.65E-12 | AAEL005528-PA OS=Reedes aegypti GN=AAEL005528 PE=4 SV=1                        |
| CCG008277.1 | 1089  | 71918  | 6673 | 2837.73864 | 214.2117364 | -3.727632288 | Down | 0        | 0        | AAEL002417-PC OS=Reedes aegypti GN=AAEL002417 PE=4 SV=1                        |
| CCG004090.1 | 738   | 1392   | 6675 | 81.0486051 | 316.1876659 | 1.963921829  | Up   | 2.91E-12 | 6.82E-12 | Nucleolar protein NOP5 OS=Culex quinquefasciatus GN=CpipJ_CPIJ014566 PE=4 SV=1 |
| CCG006552.1 | 2811  | 2231   | 6686 | 34.1036919 | 83.14871523 | 1.285766045  | Up   | 0        | 0        | AAEL000994-PA OS=Reedes aegypti GN=AAEL000994 PE=4 SV=1                        |
| CCG007151.1 | 1490  | 2229   | 6694 | 64.2815694 | 157.0541642 | 1.288785138  | Up   | 0        | 0        | AAEL004484-PA OS=Reedes aegypti GN=AAEL004484 PE=4 SV=1                        |



|             |       |       |      |            |             |              |      |          |          |                                                                                          |
|-------------|-------|-------|------|------------|-------------|--------------|------|----------|----------|------------------------------------------------------------------------------------------|
| CCG013416.1 | 16232 | 1400  | 6698 | 3.70611314 | 14.4252426  | 1.960616753  | Up   | 8.19E-13 | 2.05E-12 | AAEL010899-PA OS=Aedes aegypti GN=AAEL010899 PE=4 SV=1                                   |
| CCG022863.1 | 810   | 536   | 6734 | 28.4342935 | 290.6284392 | 3.353472019  | Up   | 0        | 0        | AAEL012865-PA OS=Aedes aegypti GN=AAEL012865 PE=4 SV=1                                   |
| CCG022785.1 | 7515  | 557   | 6735 | 3.18484926 | 31.3298728  | 3.298241917  | Up   | 5.29E-13 | 1.37E-12 | AAEL000295-PA OS=Aedes aegypti GN=AAEL000295 PE=4 SV=1                                   |
| CCG015560.1 | 2324  | 987   | 6735 | 18.2491945 | 101.3098081 | 2.47286916   | Up   | 3.78E-12 | 8.77E-12 | AAEL005567-PA OS=Aedes aegypti GN=AAEL005567 PE=2 SV=1                                   |
| CCG008966.1 | 16556 | 12482 | 6746 | 32.3960031 | 14.24429422 | -1.18543169  | Down | 0        | 0        | TXR DNA-binding protein 45 OS=Culex quinquefasciatus GN=CpipJ_CPIJ014288 PE=4 SV=1       |
| CCG009398.1 | 4642  | 1116  | 6754 | 10.3305092 | 50.86346431 | 2.299718356  | Up   | 3.58E-12 | 8.33E-12 | AAEL006320-PA OS=Aedes aegypti GN=AAEL006320 PE=4 SV=1                                   |
| CCG013600.3 | 3330  | 16056 | 6759 | 207.183801 | 70.95585366 | -1.545917599 | Down | 0        | 0        | Uncharacterized protein OS=Anopheles darlingi GN=AND_21730 PE=3 SV=1                     |
| CCG017035.1 | 3947  | 1464  | 6770 | 15.9381027 | 59.96137161 | 1.911553484  | Up   | 4.30E-12 | 9.90E-12 | AAEL006205-PA OS=Aedes aegypti GN=AAEL006205 PE=4 SV=1                                   |
| CCG011048.1 | 9092  | 16922 | 6772 | 79.9751264 | 26.03799497 | -1.618933008 | Down | 0        | 0        | AAEL011604-PA OS=Aedes aegypti GN=AAEL011604 PE=4 SV=1                                   |
| CCG021500.1 | 753   | 4     | 6784 | 0.22825888 | 314.9494683 | 10.43023366  | Up   | 2.95E-05 | 5.04E-05 | SV kDa salivary gland antigen 30k-3 OS=Aedes albopictus PE=2 SV=1                        |
| CCG028513.1 | 45562 | 1197  | 6784 | 1.12889628 | 5.205147922 | 2.205026221  | Up   | 7.99E-13 | 2.00E-12 | Putative methoprene-tolerant mutant OS=Aedes aegypti PE=2 SV=1                           |
| CCG003634.1 | 3302  | 2052  | 6815 | 26.7031785 | 72.15041072 | 1.43399613   | Up   | 0        | 0        | Uncharacterized protein OS=Anopheles darlingi GN=AND_11093 PE=4 SV=1                     |
| CCG023382.1 | 3741  | 705   | 6818 | 8.09774469 | 63.71171639 | 2.975966641  | Up   | 7.66E-13 | 1.92E-12 | Putative uncharacterized protein OS=Culex quinquefasciatus GN=CpipJ_CPIJ009921 PE=4 SV=1 |
| CCG027773.1 | 3045  | 789   | 6821 | 11.1340298 | 78.30883608 | 2.814199261  | Up   | 0        | 0        | AAEL001032-PA OS=Aedes aegypti GN=AAEL001032 PE=4 SV=1                                   |
| CCG016658.1 | 4899  | 813   | 6826 | 7.1309235  | 48.70896045 | 2.772026361  | Up   | 0        | 0        | Putative uncharacterized protein OS=Culex quinquefasciatus GN=CpipJ_CPIJ001658 PE=4 SV=1 |

|             |       |       |      |            |             |             |      |          |          |                                                                                          |
|-------------|-------|-------|------|------------|-------------|-------------|------|----------|----------|------------------------------------------------------------------------------------------|
| CCG023105.1 | 18387 | 2187  | 6833 | 5.1109376  | 12.99123866 | 1.34587911  | Up   | 0        | 0        | AAEL008015-PA OS=Aedes aegypti GN=AAEL008015 PE=4 SV=1                                   |
| CCG027735.1 | 2975  | 1447  | 6843 | 20.8999012 | 80.40991192 | 1.943877229 | Up   | 6.55E-12 | 1.47E-11 | AAEL009895-PA (Fragment) OS=Aedes aegypti GN=AAEL009895 PE=4 SV=1                        |
| CCG008582.1 | 16927 | 677   | 6858 | 1.7185863  | 14.16339943 | 3.042873369 | Up   | 4.03E-13 | 1.07E-12 | AAEL007698-PA OS=Aedes aegypti GN=PIWI4 PE=4 SV=1                                        |
| CCG024974.1 | 3195  | 1782  | 6883 | 23.9662182 | 75.31074148 | 1.651853377 | Up   | 0        | 0        | AAEL002705-PA OS=Aedes aegypti GN=AAEL002705 PE=4 SV=1                                   |
| CCG025523.1 | 9764  | 2183  | 6894 | 9.60701871 | 24.68274888 | 1.361342372 | Up   | 0        | 0        | AAEL008579-PA OS=Aedes aegypti GN=AAEL008579 PE=4 SV=1                                   |
| CCG014706.2 | 11574 | 1137  | 6895 | 4.22123624 | 20.82575759 | 2.302631501 | Up   | 4.86E-12 | 1.11E-11 | PolyQ domain-containing hypothetical conserved protein OS=Aedes aegypti PE=2 SV=1        |
| CCG007906.1 | 1686  | 2477  | 6901 | 63.1293195 | 143.0884152 | 1.180524768 | Up   | 0        | 0        | Putative uncharacterized protein OS=Culex quinquefasciatus GN=CpipJ_CPIJ009698 PE=4 SV=1 |
| CCG006070.1 | 2229  | 2621  | 6901 | 50.5265475 | 108.2310758 | 1.099001283 | Up   | 0        | 0        | AAEL007042-PA OS=Aedes aegypti GN=AAEL007042 PE=4 SV=1                                   |
| CCG007533.1 | 2068  | 11275 | 6903 | 234.276479 | 116.6909983 | -1.00551884 | Down | 0        | 0        | Ribose-phosphate pyrophosphokinase OS=Aedes aegypti GN=AAEL004178 PE=3 SV=1              |
| CCG021341.1 | 4974  | 971   | 6909 | 8.38834184 | 48.55784765 | 2.533246915 | Up   | 4.63E-12 | 1.06E-11 | AAEL000181-PA OS=Aedes aegypti GN=AAEL000181 PE=4 SV=1                                   |
| CCG023237.1 | 2388  | 1858  | 6909 | 33.4329007 | 101.1418485 | 1.597039614 | Up   | 0        | 0        | AAEL012827-PA OS=Aedes aegypti GN=AAEL012827 PE=3 SV=1                                   |
| CCG026844.1 | 3440  | 1466  | 6912 | 18.312102  | 70.24174682 | 1.939531318 | Up   | 1.74E-12 | 4.17E-12 | AAEL005528-PA OS=Aedes aegypti GN=AAEL005528 PE=4 SV=1                                   |
| CCG003448.1 | 1879  | 2549  | 6917 | 58.2915665 | 128.6888773 | 1.142528287 | Up   | 0        | 0        | AAEL005877-PA OS=Aedes aegypti GN=AAEL005877 PE=4 SV=1                                   |
| CCG002972.1 | 5871  | 2497  | 6933 | 18.2754943 | 41.28184855 | 1.175597143 | Up   | 0        | 0        | AAEL009706-PA OS=Aedes aegypti GN=AAEL009706 PE=4 SV=1                                   |

|             |       |      |      |            |             |             |    |          |          |                                                                                                   |
|-------------|-------|------|------|------------|-------------|-------------|----|----------|----------|---------------------------------------------------------------------------------------------------|
| CCG010771.1 | 4245  | 1267 | 6936 | 12.8251246 | 57.11910664 | 2.155000578 | Up | 3.44E-12 | 8.01E-12 | AAEL007538-PA (Fragment)<br>OS=Aedes aegypti<br>GN=AAEL007538 PE=4 SV=1                           |
| CCG018659.2 | 37887 | 2507 | 6942 | 2.84332686 | 6.405372749 | 1.171702573 | Up | 0        | 0        | AAEL001869-PA OS=Aedes<br>aegypti GN=AAEL001869 PE=4<br>SV=1                                      |
| CCG025447.1 | 1737  | 807  | 6947 | 19.9634864 | 139.8129814 | 2.808062723 | Up | 9.50E-13 | 2.36E-12 | Putative uncharacterized protein<br>OS=Culex quinquefasciatus<br>GN=CpipJ_CPIJ004712 PE=4<br>SV=1 |
| CCG005554.1 | 6110  | 2006 | 6950 | 14.1075757 | 39.76432464 | 1.495004576 | Up | 0        | 0        | AAEL003275-PA OS=Aedes<br>aegypti GN=AAEL003275 PE=4<br>SV=2                                      |
| CCG024227.1 | 7318  | 1582 | 6966 | 9.28916646 | 33.2767636  | 1.840894077 | Up | 1.12E-12 | 2.76E-12 | AAEL001910-PA OS=Aedes<br>aegypti GN=AAEL001910 PE=4<br>SV=1                                      |
| CCG009741.1 | 3399  | 1073 | 6969 | 13.5647323 | 71.6752665  | 2.401614783 | Up | 3.38E-12 | 7.88E-12 | AAEL014212-PA OS=Aedes<br>aegypti GN=AAEL014212 PE=4<br>SV=1                                      |
| CCG023537.1 | 2835  | 1873 | 6976 | 28.3888229 | 86.02078969 | 1.599362344 | Up | 0        | 0        | AAEL013334-PA OS=Aedes<br>aegypti GN=AAEL013334 PE=4<br>SV=1                                      |
| CCG016238.1 | 5792  | 2176 | 6977 | 16.1433257 | 42.11047946 | 1.383241481 | Up | 0        | 0        | AAEL004327-PA OS=Aedes<br>aegypti GN=AAEL004327 PE=3<br>SV=1                                      |
| CCG020044.1 | 1431  | 1274 | 7003 | 38.2553752 | 171.0781357 | 2.160921014 | Up | 1.62E-12 | 3.89E-12 | AAEL013653-PA OS=Aedes<br>aegypti GN=AAEL013653 PE=4<br>SV=1                                      |
| CCG025920.2 | 4296  | 827  | 7008 | 8.27187396 | 57.0269096  | 2.785356744 | Up | 1.96E-12 | 4.67E-12 | AAEL012290-PA OS=Aedes<br>aegypti GN=AAEL012290 PE=4<br>SV=1                                      |
| CCG001115.1 | 2247  | 1294 | 7017 | 24.7453656 | 109.1687709 | 2.141329949 | Up | 3.05E-12 | 7.15E-12 | AAEL000857-PA OS=Aedes<br>aegypti GN=AAEL000857 PE=4<br>SV=1                                      |
| CCG012679.1 | 4407  | 1358 | 7022 | 13.2409575 | 55.7016155  | 2.07271172  | Up | 5.15E-12 | 1.17E-11 | AAEL007258-PA OS=Aedes<br>aegypti GN=AAEL007258 PE=4<br>SV=1                                      |
| CCG013370.1 | 4191  | 571  | 7027 | 5.85438284 | 58.6141281  | 3.323659452 | Up | 0        | 0        | AAEL006249-PA OS=Aedes<br>aegypti GN=AAEL006249 PE=4<br>SV=1                                      |
| CCG026522.1 | 4248  | 1271 | 7036 | 12.8565284 | 57.90170324 | 2.171104656 | Up | 5.38E-12 | 1.22E-11 | AAEL009934-PA OS=Aedes<br>aegypti GN=AAEL009934 PE=4<br>SV=1                                      |
| CCG004459.2 | 41423 | 1677 | 7040 | 1.73961917 | 5.941295137 | 1.772005944 | Up | 3.09E-12 | 7.24E-12 | AAEL009357-PA (Fragment)<br>OS=Aedes aegypti<br>GN=AAEL009357 PE=4 SV=1                           |
| CCG011648.1 | 5901  | 1514 | 7087 | 11.0246023 | 41.98429207 | 1.929123048 | Up | 3.22E-12 | 7.53E-12 | AAEL004839-PA OS=Aedes<br>aegypti GN=AAEL004839 PE=3<br>SV=1                                      |

|             |      |       |      |            |             |              |      |          |          |                                                                                                   |
|-------------|------|-------|------|------------|-------------|--------------|------|----------|----------|---------------------------------------------------------------------------------------------------|
| CCG012664.1 | 3327 | 1034  | 7092 | 13.3545854 | 74.51881541 | 2.480269554  | Up   | 3.89E-12 | 8.99E-12 | Uncharacterized protein<br>OS=Anopheles darlingi<br>GN=AND_06456 PE=3 SV=1                        |
| CCG004387.1 | 3982 | 1472  | 7094 | 15.8843419 | 62.27875827 | 1.971134863  | Up   | 4.36E-12 | 1.00E-11 | AAEL010698-PA (Fragment)<br>OS=Aedes aegypti<br>GN=AAEL010698 PE=4 SV=1                           |
| CCG021737.1 | 834  | 2354  | 7097 | 121.283879 | 297.4806838 | 1.29440819   | Up   | 0        | 0        | 60S ribosomal protein L13a<br>(Fragment) OS=Aedes aegypti<br>PE=2 SV=1                            |
| CCG016817.1 | 4426 | 204   | 7103 | 1.98053002 | 56.10226839 | 4.824100632  | Up   | 6.59E-14 | 2.17E-13 | AAEL014694-PA OS=Aedes<br>aegypti GN=AAEL014694 PE=4<br>SV=1                                      |
| CCG026044.1 | 2661 | 31612 | 7118 | 510.469467 | 93.51109134 | -2.448615272 | Down | 0        | 0        | Putative uncharacterized protein<br>OS=Culex quinquefasciatus<br>GN=CpipJ_CPIJ009078 PE=4<br>SV=1 |
| CCG007358.1 | 5300 | 2152  | 7125 | 17.4473338 | 46.9957966  | 1.42952514   | Up   | 0        | 0        | AAEL000564-PA OS=Aedes<br>aegypti GN=AAEL000564 PE=4<br>SV=1                                      |
| CCG003528.1 | 3663 | 361   | 7131 | 4.23480049 | 68.05554782 | 4.006346866  | Up   | 1.35E-13 | 4.08E-13 | AAEL000388-PA OS=Aedes<br>aegypti GN=AAEL000388 PE=3<br>SV=1                                      |
| CCG023895.1 | 1270 | 1302  | 7139 | 44.0524366 | 196.5095574 | 2.157305757  | Up   | 2.82E-12 | 6.61E-12 | AAEL010668-PA OS=Aedes<br>aegypti GN=AAEL010668 PE=4<br>SV=1                                      |
| CCG023812.1 | 1945 | 905   | 7157 | 19.9936297 | 128.6356745 | 2.685678486  | Up   | 0        | 0        | AAEL012126-PA OS=Aedes<br>aegypti GN=AAEL012126 PE=4<br>SV=1                                      |
| CCG016471.1 | 7642 | 1908  | 7170 | 10.7283766 | 32.799116   | 1.612225151  | Up   | 0        | 0        | AAEL005231-PA OS=Aedes<br>aegypti GN=AAEL005231 PE=4<br>SV=1                                      |
| CCG012781.1 | 2112 | 654   | 7173 | 13.305969  | 118.7290338 | 3.157527294  | Up   | 1.01E-12 | 2.50E-12 | Adenosylhomocysteinase<br>OS=Aedes aegypti<br>GN=AAEL008341 PE=2 SV=1                             |
| CCG012782.1 | 3104 | 2430  | 7184 | 33.6393219 | 80.90858902 | 1.26614424   | Up   | 0        | 0        | Uncharacterized protein<br>OS=Anopheles darlingi<br>GN=AND_03468 PE=4 SV=1                        |
| CCG001704.1 | 3357 | 1431  | 7209 | 18.3168574 | 75.07125923 | 2.035088681  | Up   | 5.80E-12 | 1.31E-11 | AAEL001540-PA OS=Aedes<br>aegypti GN=AAEL001540 PE=4<br>SV=1                                      |
| CCG016920.1 | 3180 | 700   | 7230 | 9.45874661 | 79.4806104  | 3.070882024  | Up   | 0        | 0        | Dab2-interacting protein<br>OS=Culex quinquefasciatus<br>GN=CpipJ_CPIJ007375 PE=4<br>SV=1         |

|             |       |       |      |            |             |              |      |          |          |                                                                                              |
|-------------|-------|-------|------|------------|-------------|--------------|------|----------|----------|----------------------------------------------------------------------------------------------|
| CCG018110.1 | 4158  | 173   | 7251 | 1.78782205 | 60.96259377 | 5.091649235  | Up   | 3.60E-13 | 9.69E-13 | AAEL009490-PA (Fragment)<br>OS=Aedes aegypti<br>GN=AAEL009490 PE=3 SV=1                      |
| CCG016919.1 | 1227  | 2004  | 7272 | 70.1803978 | 207.1854839 | 1.561782895  | Up   | 0        | 0        | AAEL001005-PA OS=Aedes<br>aegypti GN=AAEL001005 PE=3<br>SV=1                                 |
| CCG021760.1 | 2860  | 1969  | 7290 | 29.5830096 | 89.10693625 | 1.590768907  | Up   | 0        | 0        | AAEL008374-PA OS=Aedes<br>aegypti GN=AAEL008374 PE=4<br>SV=1                                 |
| CCG023775.1 | 6679  | 1638  | 7305 | 10.5381682 | 38.2347974  | 1.85926212   | Up   | 7.06E-12 | 1.58E-11 | DNA-directed RNA polymerase<br>OS=Culex quinquefasciatus<br>GN=CpipJ_CPIJ016666 PE=3<br>SV=1 |
| CCG019398.1 | 516   | 1906  | 7332 | 158.721539 | 496.7327234 | 1.64597187   | Up   | 0        | 0        | 60S ribosomal protein L21<br>OS=Aedes aegypti<br>GN=AAEL007715 PE=2 SV=1                     |
| CCG016849.1 | 3587  | 1299  | 7339 | 15.5611055 | 71.52461478 | 2.20049527   | Up   | 7.92E-13 | 1.99E-12 | AAEL008862-PA OS=Aedes<br>aegypti GN=AAEL008862 PE=3<br>SV=1                                 |
| CCG021605.1 | 4380  | 2785  | 7345 | 27.3220801 | 58.622955   | 1.101398367  | Up   | 0        | 0        | AAEL008389-PA (Fragment)<br>OS=Aedes aegypti<br>GN=AAEL008389 PE=4 SV=1                      |
| CCG001100.1 | 2097  | 2376  | 7361 | 48.6867379 | 122.7123869 | 1.333680139  | Up   | 0        | 0        | AAEL013538-PA OS=Aedes<br>aegypti GN=AAEL013538 PE=4<br>SV=1                                 |
| CCG010807.5 | 16644 | 31762 | 7371 | 81.9998024 | 15.4817026  | -2.405056292 | Down | 0        | 0        | AAEL013559-PA OS=Aedes<br>aegypti GN=AAEL013559 PE=4<br>SV=1                                 |
| CCG004997.1 | 1164  | 497   | 7373 | 18.347043  | 221.4324524 | 3.593247204  | Up   | 7.04E-14 | 2.29E-13 | AAEL000604-PA OS=Aedes<br>aegypti GN=AAEL000604 PE=4<br>SV=1                                 |
| CCG011547.1 | 1395  | 70899 | 7373 | 2183.87901 | 184.7651431 | -3.563128413 | Down | 0        | 0        | Citrate synthase OS=Anopheles<br>darlingi GN=AND_04269 PE=3<br>SV=1                          |
| CCG014217.1 | 5548  | 887   | 7380 | 6.86989088 | 46.50181734 | 2.75892801   | Up   | 1.39E-12 | 3.35E-12 | Zinc finger protein 650 OS=Culex<br>quinquefasciatus<br>GN=CpipJ_CPIJ009486 PE=4<br>SV=1     |
| CCG022466.2 | 24426 | 2906  | 7381 | 5.11217755 | 10.5636224  | 1.047094791  | Up   | 0        | 0        | AAEL008881-PA OS=Aedes<br>aegypti GN=AAEL008881 PE=4<br>SV=1                                 |
| CCG018614.1 | 2908  | 39672 | 7395 | 586.208842 | 88.89836889 | -2.721185874 | Down | 0        | 0        | AAEL010608-PA (Fragment)<br>OS=Aedes aegypti<br>GN=AAEL010608 PE=4 SV=1                      |

|             |       |       |      |            |             |              |      |          |          |                                                                   |
|-------------|-------|-------|------|------------|-------------|--------------|------|----------|----------|-------------------------------------------------------------------|
| CCG008286.1 | 31410 | 2066  | 7414 | 2.82634421 | 8.251533397 | 1.545725065  | Up   | 0        | 0        | AAEL013131-PA OS=Aedes aegypti GN=AAEL013131 PE=4 SV=1            |
| CCG001636.1 | 1143  | 499   | 7478 | 18.7593155 | 228.7121555 | 3.607853954  | Up   | 0        | 0        | AAEL001216-PA OS=Aedes aegypti GN=AAEL001216 PE=2 SV=1            |
| CCG025748.1 | 3795  | 1811  | 7480 | 20.5054517 | 68.90327016 | 1.748564928  | Up   | 0        | 0        | AAEL012989-PA OS=Aedes aegypti GN=AAEL012989 PE=4 SV=1            |
| CCG017415.3 | 2893  | 1712  | 7482 | 25.4283393 | 90.41058652 | 1.830054468  | Up   | 5.08E-12 | 1.16E-11 | AAEL011089-PA OS=Aedes aegypti GN=AAEL011089 PE=4 SV=1            |
| CCG022723.1 | 5306  | 2236  | 7486 | 18.107864  | 49.32108178 | 1.445588064  | Up   | 0        | 0        | AAEL004838-PA OS=Aedes aegypti GN=AAEL004838 PE=4 SV=1            |
| CCG009547.1 | 4117  | 1073  | 7502 | 11.1990588 | 63.70099401 | 2.507938391  | Up   | 3.38E-12 | 7.87E-12 | AAEL009189-PA OS=Aedes aegypti GN=AAEL009189 PE=4 SV=1            |
| CCG006708.1 | 2628  | 298   | 7504 | 4.87251937 | 99.81998056 | 4.356588796  | Up   | 3.92E-13 | 1.05E-12 | AAEL008098-PA OS=Aedes aegypti GN=PIWI2 PE=4 SV=1                 |
| CCG013829.2 | 1800  | 223   | 7519 | 5.32347268 | 146.0284906 | 4.77773839   | Up   | 0        | 0        | Rap55 OS=Culex quinquefasciatus                                   |
| CCG025916.1 | 15700 | 889   | 7524 | 2.43312701 | 16.75325315 | 2.783557729  | Up   | 0        | 0        | AAEL007823-PA OS=Aedes aegypti GN=AAEL007823 PE=4 SV=1            |
| CCG003898.4 | 3426  | 2825  | 7549 | 35.4318448 | 77.02861394 | 1.120347883  | Up   | 0        | 0        | AAEL009437-PA (Fragment) OS=Aedes aegypti GN=AAEL009437 PE=4 SV=1 |
| CCG025503.1 | 2493  | 756   | 7555 | 13.0305332 | 105.9405459 | 3.02328682   | Up   | 0        | 0        | AAEL012918-PA OS=Aedes aegypti GN=AAEL012918 PE=4 SV=1            |
| CCG019279.1 | 3303  | 675   | 7563 | 8.78128092 | 80.04524591 | 3.188312415  | Up   | 1.92E-12 | 4.59E-12 | AAEL005453-PA (Fragment) OS=Aedes aegypti GN=AAEL005453 PE=4 SV=1 |
| CCG005054.1 | 5137  | 2028  | 7563 | 16.9637185 | 51.46767515 | 1.60121417   | Up   | 0        | 0        | AAEL001454-PA OS=Aedes aegypti GN=AAEL001454 PE=4 SV=1            |
| CCG020660.1 | 1701  | 18673 | 7564 | 471.707145 | 155.4523254 | -1.601419257 | Down | 0        | 0        | AAEL004034-PA OS=Aedes aegypti GN=CYP4G36 PE=3 SV=1               |
| CCG004898.1 | 2395  | 1006  | 7570 | 18.0490827 | 110.494428  | 2.613976199  | Up   | 4.55E-12 | 1.05E-11 | AAEL001004-PA OS=Aedes aegypti GN=AAEL001004 PE=4 SV=1            |
| CCG025305.1 | 23693 | 1891  | 7590 | 3.42952636 | 11.19880643 | 1.707263726  | Up   | 0        | 0        | AAEL009719-PA OS=Aedes aegypti GN=AAEL009719 PE=4 SV=1            |

|             |       |       |      |            |             |              |      |          |          |                                                                                                          |
|-------------|-------|-------|------|------------|-------------|--------------|------|----------|----------|----------------------------------------------------------------------------------------------------------|
| CCG015033.1 | 1610  | 2734  | 7591 | 72.968481  | 164.825018  | 1.175589912  | Up   | 0        | 0        | AAEL007160-PA OS=Aedes aegypti GN=AAEL007160 PE=4 SV=1                                                   |
| CCG024840.1 | 32234 | 1612  | 7606 | 2.14888665 | 8.248825871 | 1.940599399  | Up   | 1.56E-12 | 3.75E-12 | Serine/threonine-protein kinase D OS=Aedes aegypti GN=AAEL002892 PE=3 SV=1                               |
| CCG020268.1 | 1251  | 1350  | 7616 | 46.3702172 | 212.8235299 | 2.198387275  | Up   | 0        | 0        | AAEL006353-PA OS=Aedes aegypti GN=AAEL008353 PE=2 SV=1                                                   |
| CCG026083.1 | 1398  | 941   | 7643 | 28.9231189 | 191.1202499 | 2.724185606  | Up   | 0        | 0        | AAEL006830-PA OS=Aedes aegypti GN=AAEL006830 PE=4 SV=1                                                   |
| CCG001101.1 | 11202 | 12574 | 7693 | 48.2325873 | 24.00767927 | -1.006512251 | Down | 0        | 0        | AAEL013530-PA OS=Aedes aegypti GN=AAEL013530 PE=3 SV=1                                                   |
| CCG007937.2 | 49617 | 2916  | 7702 | 2.52533902 | 5.426540252 | 1.103555607  | Up   | 0        | 0        | AAEL010184-PA OS=Aedes aegypti GN=AAEL010184 PE=4 SV=1                                                   |
| CCG023566.1 | 1568  | 55837 | 7717 | 1530.1665  | 172.0491211 | -3.152796216 | Down | 0        | 0        | -                                                                                                        |
| CCG025941.1 | 4046  | 895   | 7730 | 9.50516868 | 66.78879868 | 2.81282203   | Up   | 9.98E-13 | 2.47E-12 | AAEL011876-PA OS=Aedes aegypti GN=AAEL011876 PE=4 SV=1                                                   |
| CCG025019.1 | 15173 | 2502  | 7731 | 7.08563079 | 17.81206338 | 1.329886452  | Up   | 0        | 0        | AAEL014098-PA OS=Aedes aegypti GN=AAEL014098 PE=4 SV=1                                                   |
| CCG019436.1 | 2793  | 2120  | 7737 | 32.6157671 | 96.83930805 | 1.570023213  | Up   | 0        | 0        | AAEL003800-PA OS=Aedes aegypti GN=AAEL003800 PE=4 SV=1                                                   |
| CCG013430.1 | 276   | 22    | 7743 | 3.42512377 | 980.731656  | 8.161558512  | Up   | 8.38E-11 | 1.80E-10 | Ribosomal protein L37 OS=Aedes aegypti PE=3 SV=1                                                         |
| CCG026722.1 | 1443  | 61476 | 7749 | 1830.63576 | 187.7281266 | -3.285628045 | Down | 0        | 0        | AAEL001673-PA OS=Aedes aegypti GN=AAEL001673 PE=3 SV=1                                                   |
| CCG012529.1 | 1839  | 26471 | 7779 | 618.516501 | 147.874081  | -2.064442881 | Down | 0        | 0        | Putative uncharacterized protein OS=Culex quinquefasciatus GN=CpipJ_CPIJ008687 PE=4 SV=1                 |
| CCG023268.1 | 8013  | 706   | 7786 | 3.78592695 | 33.96794496 | 3.16545546   | Up   | 0        | 0        | AAEL006187-PA OS=Aedes aegypti GN=AAEL006187 PE=4 SV=1                                                   |
| CCG018341.1 | 3620  | 1424  | 7787 | 16.9030116 | 75.19892299 | 2.153431684  | Up   | 4.81E-12 | 1.10E-11 | AAEL013173-PA OS=Aedes aegypti GN=AAEL013173 PE=4 SV=1                                                   |
| CCG025165.1 | 1305  | 2198  | 7787 | 72.3735453 | 208.5977787 | 1.527189444  | Up   | 0        | 0        | Lipid storage droplets surface-binding protein 1 OS=Culex quinquefasciatus GN=CpipJ_CPIJ003879 PE=4 SV=1 |

|             |       |       |      |            |             |              |      |          |          |                                                                                                   |
|-------------|-------|-------|------|------------|-------------|--------------|------|----------|----------|---------------------------------------------------------------------------------------------------|
| CCG016031.1 | 3900  | 2839  | 7811 | 31.2797632 | 70.01515381 | 1.162437615  | Up   | 0        | 0        | Putative uncharacterized protein<br>OS=Culex quinquefasciatus<br>GN=CpipJ_CPIJ015901 PE=4<br>SV=1 |
| CCG002156.2 | 3698  | 2732  | 7813 | 31.7450825 | 73.85857664 | 1.218232334  | Up   | 0        | 0        | AAEL001919-PA OS=Aedes<br>aegypti GN=AAEL001919 PE=4<br>SV=1                                      |
| CCG021633.1 | 6440  | 1931  | 7861 | 12.8842481 | 42.67189654 | 1.727677889  | Up   | 0        | 0        | AGAP012219-PA OS=Anopheles<br>gambiae GN=AGAP012219 PE=4<br>SV=4                                  |
| CCG024675.1 | 1860  | 14030 | 7883 | 324.12117  | 148.1591913 | -1.129385125 | Down | 0        | 0        | AAEL015076-PA OS=Aedes<br>aegypti GN=AAEL015076 PE=4<br>SV=1                                      |
| CCG019309.1 | 1548  | 0     | 7889 | 0.001      | 178.1562309 | 17.44278342  | Up   | 4.44E-16 | 1.65E-15 | AAEL013703-PA (Fragment)<br>OS=Aedes aegypti<br>GN=AAEL013703 PE=3 SV=1                           |
| CCG009481.1 | 14959 | 2758  | 7889 | 7.92235631 | 18.43611508 | 1.218533185  | Up   | 0        | 0        | AAEL004981-PA OS=Aedes<br>aegypti GN=AAEL004981 PE=4<br>SV=1                                      |
| CCG013152.1 | 5808  | 1543  | 7893 | 11.4156853 | 47.50786477 | 2.057148891  | Up   | 1.47E-12 | 3.54E-12 | AAEL013131-PA OS=Aedes<br>aegypti GN=AAEL013131 PE=4<br>SV=1                                      |
| CCG021104.1 | 1809  | 2807  | 7896 | 66.6755362 | 152.5873706 | 1.19440613   | Up   | 0        | 0        | AAEL001959-PA OS=Aedes<br>aegypti GN=AAEL001959 PE=4<br>SV=1                                      |
| CCG004911.1 | 2523  | 2097  | 7901 | 35.7144405 | 109.4749682 | 1.616021604  | Up   | 0        | 0        | AGAP010331-PA OS=Anopheles<br>gambiae GN=AGAP010331 PE=3<br>SV=3                                  |
| CCG007993.1 | 4200  | 146   | 7903 | 1.49370982 | 65.77982413 | 5.460673338  | Up   | 9.33E-15 | 3.34E-14 | AAEL011312-PA OS=Aedes<br>aegypti GN=AAEL011312 PE=4<br>SV=1                                      |
| CCG009980.1 | 16735 | 1766  | 7907 | 4.5344817  | 16.51718521 | 1.864958285  | Up   | 1.35E-12 | 3.28E-12 | AAEL001165-PA OS=Aedes<br>aegypti GN=AAEL001165 PE=4<br>SV=1                                      |
| CCG002534.1 | 1794  | 2523  | 7924 | 60.4306803 | 154.4087989 | 1.353401878  | Up   | 0        | 0        | AAEL001052-PA OS=Aedes<br>aegypti GN=AAEL001052 PE=3<br>SV=1                                      |
| CCG004231.1 | 2970  | 2684  | 7932 | 38.8319083 | 93.36331696 | 1.26561321   | Up   | 0        | 0        | AAEL004886-PA OS=Aedes<br>aegypti GN=AAEL004886 PE=4<br>SV=1                                      |
| CCG005650.1 | 2030  | 26502 | 7961 | 560.977294 | 137.0949958 | -2.032766467 | Down | 0        | 0        | AAEL008073-PA OS=Aedes<br>aegypti GN=AAEL008073 PE=4<br>SV=1                                      |
| CCG022749.1 | 3360  | 2592  | 7987 | 33.148081  | 83.09873708 | 1.325901199  | Up   | 0        | 0        | AAEL002646-PA OS=Aedes<br>aegypti GN=AAEL002646 PE=4<br>SV=1                                      |



|             |       |       |      |            |             |              |      |          |          |                                                                      |
|-------------|-------|-------|------|------------|-------------|--------------|------|----------|----------|----------------------------------------------------------------------|
| CCG004134.1 | 3586  | 2471  | 7992 | 29.6090949 | 77.91035916 | 1.395774776  | Up   | 0        | 0        | AAEL003466-PA OS=Aedes aegypti GN=AAEL003466 PE=3 SV=1               |
| CCG015276.2 | 30756 | 19800 | 7997 | 27.6629193 | 9.089652079 | -1.605656433 | Down | 0        | 0        | AAEL009872-PA OS=Aedes aegypti GN=AAEL009872 PE=4 SV=1               |
| CCG025355.3 | 15242 | 2023  | 7998 | 5.70317367 | 18.34380643 | 1.685456165  | Up   | 0        | 0        | Uncharacterized protein OS=Anopheles darlingi GN=AND_14521 PE=4 SV=1 |
| CCG008930.1 | 3144  | 1265  | 8010 | 17.2890313 | 89.06354865 | 2.364978062  | Up   | 6.04E-12 | 1.36E-11 | AAEL011240-PA OS=Aedes aegypti GN=AAEL011240 PE=4 SV=1               |
| CCG010790.1 | 1920  | 6     | 8053 | 0.13428042 | 146.6244806 | 10.09266132  | Up   | 8.38E-06 | 1.47E-05 | AAEL002652-PA OS=Aedes aegypti GN=AAEL002652 PE=4 SV=1               |
| CCG008616.1 | 3073  | 1560  | 8062 | 21.8134676 | 91.71286278 | 2.071904958  | Up   | 7.56E-13 | 1.90E-12 | AAEL010311-PA OS=Aedes aegypti GN=AAEL010311 PE=4 SV=1               |
| CCG017078.1 | 2111  | 192   | 8067 | 3.90818998 | 133.5899662 | 5.095167244  | Up   | 0        | 0        | Importin subunit alpha OS=Aedes aegypti GN=AAEL012960 PE=3 SV=1      |
| CCG025991.2 | 2582  | 1683  | 8080 | 28.0085451 | 109.3969312 | 1.96563332   | Up   | 1.60E-12 | 3.86E-12 | AAEL010826-PA OS=Aedes aegypti GN=AAEL010826 PE=3 SV=1               |
| CCG018403.1 | 3519  | 1492  | 8082 | 18.2184837 | 80.28780701 | 2.13977802   | Up   | 2.02E-12 | 4.82E-12 | AAEL004500-PA OS=Aedes aegypti GN=AAEL004500 PE=4 SV=1               |
| CCG012666.1 | 1239  | 2055  | 8086 | 71.2694145 | 228.1457837 | 1.678601014  | Up   | 0        | 0        | Carboxypeptidase B OS=Aedes polynesiensis GN=CPB-I PE=3 SV=1         |
| CCG009878.1 | 3765  | 1444  | 8103 | 16.4802913 | 75.23689686 | 2.190698602  | Up   | 3.35E-12 | 7.81E-12 | AAEL000388-PA OS=Aedes aegypti GN=AAEL000388 PE=3 SV=1               |
| CCG009226.1 | 21237 | 2669  | 8106 | 5.40030238 | 13.34330609 | 1.305004074  | Up   | 0        | 0        | AAEL002987-PA (Fragment) OS=Aedes aegypti GN=AAEL002987 PE=3 SV=1    |
| CCG025176.1 | 2985  | 2051  | 8121 | 29.5245982 | 95.10759319 | 1.6876431    | Up   | 0        | 0        | AAEL000624-PA OS=Aedes aegypti GN=AAEL000624 PE=4 SV=1               |
| CCG009514.1 | 63359 | 3244  | 8123 | 2.20006343 | 4.48185865  | 1.026552029  | Up   | 0        | 0        | AAEL001389-PA OS=Aedes aegypti GN=AAEL001389 PE=4 SV=1               |

|             |       |        |      |            |             |              |      |          |          |                                                                                                |
|-------------|-------|--------|------|------------|-------------|--------------|------|----------|----------|------------------------------------------------------------------------------------------------|
| CCG018319.2 | 1301  | 31259  | 8137 | 1032.42962 | 218.6437341 | -2.239389526 | Down | 0        | 0        | Cytochrome b-c1 complex subunit Rieske, mitochondrial OS=Aedes aegypti GN=AAEL003675 PE=3 SV=1 |
| CCG018875.1 | 2616  | 804    | 8139 | 13.2062946 | 108.7635377 | 3.041897346  | Up   | 2.72E-13 | 7.60E-13 | AAEL001791-PA (Fragment) OS=Aedes aegypti GN=AAEL001791 PE=4 SV=1                              |
| CCG000847.1 | 3134  | 1845   | 8141 | 25.2964775 | 90.80897613 | 1.843898406  | Up   | 0        | 0        | AAEL005277-PA OS=Aedes aegypti GN=AAEL005277 PE=4 SV=1                                         |
| CCG028554.1 | 2430  | 1555   | 8144 | 27.4970935 | 117.1605786 | 2.091136185  | Up   | 2.51E-12 | 5.91E-12 | AAEL011282-PA OS=Aedes aegypti GN=AAEL011282 PE=4 SV=1                                         |
| CCG013965.1 | 5382  | 2308   | 8144 | 18.4270062 | 52.89858901 | 1.521407541  | Up   | 0        | 0        | AAEL003955-PA OS=Aedes aegypti GN=AAEL003955 PE=4 SV=1                                         |
| CCG021097.1 | 297   | 531    | 8147 | 76.824677  | 958.9396662 | 3.641798346  | Up   | 2.40E-13 | 6.77E-13 | AAEL001511-PA OS=Aedes aegypti GN=AAEL001511 PE=4 SV=1                                         |
| CCG013466.3 | 969   | 1889   | 8148 | 83.7665931 | 293.9525688 | 1.811136482  | Up   | 0        | 0        | AAEL005515-PE OS=Aedes aegypti GN=AAEL005515 PE=4 SV=1                                         |
| CCG010191.3 | 3270  | 2471   | 8154 | 32.4704019 | 87.17118924 | 1.42472615   | Up   | 0        | 0        | AAEL001218-PA OS=Aedes aegypti GN=AAEL001218 PE=3 SV=1                                         |
| CCG024106.1 | 2384  | 907    | 8220 | 16.3479653 | 120.5356691 | 2.882277142  | Up   | 0        | 0        | AAEL000193-PA OS=Aedes aegypti GN=AAEL000193 PE=4 SV=1                                         |
| CCG027343.1 | 3846  | 1945   | 8273 | 21.730664  | 75.19756207 | 1.790953631  | Up   | 0        | 0        | AAEL000293-PA OS=Aedes aegypti GN=AAEL000293 PE=4 SV=1                                         |
| CCG018664.1 | 36469 | 2761   | 8283 | 3.2531585  | 7.939877883 | 1.287275705  | Up   | 0        | 0        | AAEL002037-PA OS=Aedes aegypti GN=AAEL002037 PE=4 SV=1                                         |
| CCG017097.1 | 7377  | 26021  | 8377 | 151.567773 | 39.69709699 | -1.932857624 | Down | 0        | 0        | AAEL006307-PA OS=Aedes aegypti GN=AAEL006307 PE=4 SV=1                                         |
| CCG004782.1 | 3351  | 459    | 8419 | 5.88573804 | 87.82862792 | 3.899396027  | Up   | 5.70E-13 | 1.47E-12 | -                                                                                              |
| CCG009685.1 | 2371  | 160470 | 8482 | 2908.20469 | 125.0595123 | -4.539442113 | Down | 0        | 0        | AAEL001593-PC OS=Aedes aegypti GN=AAEL001593 PE=3 SV=1                                         |
| CCG027416.1 | 3669  | 15409  | 8519 | 180.463516 | 81.16913596 | -1.152704039 | Down | 0        | 0        | Phosphorylase OS=Aedes aegypti GN=AAEL000703 PE=3 SV=1                                         |
| CCG003710.1 | 351   | 1995   | 8569 | 244.229688 | 853.4400959 | 1.805051309  | Up   | 0        | 0        | 60S ribosomal protein L30 OS=Aedes aegypti GN=AAEL005085 PE=3 SV=1                             |

|             |       |       |      |            |             |              |      |          |          |                                                                                          |
|-------------|-------|-------|------|------------|-------------|--------------|------|----------|----------|------------------------------------------------------------------------------------------|
| CCG022453.1 | 10289 | 24686 | 8581 | 103.095623 | 29.15511449 | -1.822162195 | Down | 0        | 0        | AAEL001668-PA OS=Aedes aegypti GN=AAEL001668 PE=3 SV=1                                   |
| CCG017822.1 | 2000  | 9     | 8598 | 0.19336381 | 150.2856318 | 9.602173597  | Up   | 1.09E-06 | 2.01E-06 | AAEL005922-PA OS=Aedes aegypti GN=AAEL005922 PE=4 SV=1                                   |
| CCG009866.1 | 477   | 905   | 8608 | 81.5253875 | 630.8613133 | 2.952001584  | Up   | 0        | 0        | AAEL009985-PA OS=Aedes aegypti GN=AAEL009985 PE=4 SV=1                                   |
| CCG006098.1 | 2403  | 2151  | 8616 | 38.4635452 | 125.3435342 | 1.704323929  | Up   | 0        | 0        | AAEL004704-PA OS=Aedes aegypti GN=AAEL004704 PE=4 SV=1                                   |
| CCG008332.1 | 5517  | 2588  | 8643 | 20.1569101 | 54.766066   | 1.442007748  | Up   | 0        | 0        | AAEL008905-PA OS=Aedes aegypti GN=AAEL008905 PE=4 SV=1                                   |
| CCG003404.1 | 468   | 26707 | 8683 | 2452.12116 | 648.5955496 | -1.918639234 | Down | 0        | 0        | AAEL010205-PA OS=Aedes aegypti GN=AAEL010205 PE=4 SV=1                                   |
| CCG025782.1 | 14209 | 2845  | 8698 | 8.60362411 | 21.39961231 | 1.31456826   | Up   | 0        | 0        | Putative uncharacterized protein OS=Culex quinquefasciatus GN=CpipJ_CPIJ018110 PE=4 SV=1 |
| CCG027115.1 | 15692 | 2760  | 8704 | 7.55776622 | 19.39057106 | 1.359323493  | Up   | 0        | 0        | AAEL005356-PA OS=Aedes aegypti GN=AAEL005356 PE=4 SV=1                                   |
| CCG027309.1 | 43656 | 3250  | 8710 | 3.19891052 | 6.974679098 | 1.124546205  | Up   | 0        | 0        | AAEL004125-PA OS=Aedes aegypti GN=AAEL004125 PE=4 SV=1                                   |
| CCG005824.1 | 4173  | 4     | 8718 | 0.04118834 | 73.03289166 | 10.79209469  | Up   | 2.95E-05 | 5.04E-05 | AAEL000961-PA OS=Aedes aegypti GN=AAEL000961 PE=4 SV=1                                   |
| CCG015500.2 | 30287 | 3007  | 8721 | 4.26618655 | 10.0660723  | 1.238481908  | Up   | 0        | 0        | AAEL014695-PA OS=Aedes aegypti GN=AAEL014695 PE=4 SV=1                                   |
| CCG026155.1 | 213   | 2545  | 8725 | 513.417721 | 1431.976361 | 1.479802679  | Up   | 0        | 0        | Translation initiation factor 5A OS=Aedes albopictus PE=2 SV=1                           |
| CCG027401.1 | 4324  | 3554  | 8765 | 35.3178624 | 70.86246436 | 1.004623613  | Up   | 1.85E-11 | 4.07E-11 | DNA-directed RNA polymerase OS=Aedes aegypti GN=AAEL001847 PE=3 SV=1                     |
| CCG007724.1 | 1275  | 40703 | 8806 | 1371.76244 | 241.4451649 | -2.506263179 | Down | 0        | 0        | ATP synthase subunit beta OS=Anopheles darlingi GN=AND_21925 PE=3 SV=1                   |
| CCG023209.1 | 453   | 1313  | 8843 | 124.545831 | 682.4195177 | 2.453982177  | Up   | 8.52E-13 | 2.13E-12 | Putative salivary secreted peptide OS=Aedes albopictus PE=2 SV=1                         |
| CCG012536.1 | 1704  | 630   | 8883 | 15.8866977 | 182.2384816 | 3.519936461  | Up   | 3.95E-13 | 1.05E-12 | AAEL012817-PA OS=Aedes aegypti GN=AAEL012817 PE=3 SV=1                                   |

|             |       |       |      |            |             |              |      |          |          |                                                                                                  |
|-------------|-------|-------|------|------------|-------------|--------------|------|----------|----------|--------------------------------------------------------------------------------------------------|
| CCG025277.1 | 9296  | 22670 | 8905 | 104.789574 | 33.48789314 | -1.645783671 | Down | 0        | 0        | AAEL001668-PA OS=Aedes aegypti GN=AAEL001668 PE=3 SV=1                                           |
| CCG012161.1 | 11696 | 3077  | 8919 | 11.3045377 | 26.65807717 | 1.237670724  | Up   | 0        | 0        | AAEL014508-PA OS=Aedes aegypti GN=AAEL014508 PE=4 SV=1                                           |
| CCG025245.1 | 3717  | 486   | 8944 | 5.61831881 | 84.11805958 | 3.904205173  | Up   | 0        | 0        | AAEL014533-PA OS=Aedes aegypti GN=AAEL014533 PE=4 SV=1                                           |
| CCG012408.1 | 7233  | 22297 | 8955 | 132.461796 | 43.28098555 | -1.613771071 | Down | 0        | 0        | AAEL006307-PA OS=Aedes aegypti GN=AAEL006307 PE=4 SV=1                                           |
| CCG018796.1 | 3702  | 717   | 8995 | 8.3223392  | 84.94049151 | 3.351391461  | Up   | 1.89E-14 | 6.62E-14 | AAEL004017-PA OS=Aedes aegypti GN=AAEL004017 PE=4 SV=1                                           |
| CCG023350.1 | 3282  | 43648 | 9002 | 571.46343  | 95.88495049 | -2.575284876 | Down | 0        | 0        | AAEL012897-PA OS=Aedes aegypti GN=AAEL012897 PE=4 SV=1                                           |
| CCG018447.1 | 645   | 1324  | 9043 | 88.2045405 | 490.1204602 | 2.474211545  | Up   | 1.05E-12 | 2.59E-12 | AAEL009287-PA OS=Aedes aegypti GN=AAEL009287 PE=4 SV=1                                           |
| CCG022464.1 | 13645 | 39632 | 9045 | 124.805901 | 23.17314866 | -2.429160162 | Down | 0        | 0        | AAEL008880-PA OS=Aedes aegypti GN=AAEL008880 PE=4 SV=1                                           |
| CCG002334.1 | 1935  | 2898  | 9082 | 64.3546723 | 164.0780722 | 1.350265646  | Up   | 0        | 0        | Putative secreted peptide OS=Aedes albopictus PE=4 SV=1                                          |
| CCG013504.1 | 2265  | 2418  | 9127 | 45.872326  | 140.867193  | 1.618639691  | Up   | 0        | 0        | AAEL001352-PA OS=Aedes aegypti GN=AAEL001352 PE=4 SV=1                                           |
| CCG025494.1 | 4771  | 87831 | 9131 | 791.044804 | 66.90505664 | -3.563572252 | Down | 0        | 0        | Glyceroldehyde-3-phosphate dehydrogenase OS=Culex quinquefasciatus GN=CpipJ_CPIJ005597 PE=3 SV=1 |
| CCG022794.1 | 4000  | 28323 | 9163 | 304.257948 | 80.08067252 | -1.925768957 | Down | 0        | 0        | Sugar transporter ERD6-like 6 (Fragment) OS=Camponotus floridanus GN=EAG_03869 PE=3 SV=1         |
| CCG016917.1 | 1559  | 1671  | 9174 | 46.05672   | 205.713426  | 2.159152378  | Up   | 0        | 0        | -                                                                                                |
| CCG016858.1 | 5025  | 700   | 9195 | 5.98583368 | 63.96842884 | 3.417735951  | Up   | 0        | 0        | AAEL003671-PA OS=Aedes aegypti GN=AAEL003671 PE=4 SV=1                                           |
| CCG003573.1 | 396   | 2207  | 9221 | 239.480314 | 814.0158336 | 1.765149791  | Up   | 0        | 0        | AAEL002534-PA OS=Aedes aegypti GN=AAEL002534 PE=2 SV=1                                           |
| CCG012680.1 | 6068  | 718   | 9249 | 5.08442147 | 53.28429497 | 3.389554845  | Up   | 0        | 0        | AAEL007252-PA OS=Aedes aegypti GN=AAEL007252 PE=4 SV=1                                           |

|             |       |       |      |            |             |              |      |          |          |                                                                                |
|-------------|-------|-------|------|------------|-------------|--------------|------|----------|----------|--------------------------------------------------------------------------------|
| CCG003438.1 | 5332  | 1145  | 9261 | 9.22737174 | 60.71804223 | 2.718133589  | Up   | 4.74E-12 | 1.08E-11 | DNA topoisomerase 2 (Fragment)<br>OS=Aedes aegypti<br>GN=AAEL012584 PE=3 SV=1  |
| CCG024769.1 | 2595  | 29015 | 9280 | 480.449653 | 125.0145697 | -1.942289015 | Down | 0        | 0        | AAEL010975-PA OS=Aedes<br>aegypti GN=AAEL010975 PE=4<br>SV=1                   |
| CCG023696.1 | 5153  | 3771  | 9284 | 31.4455403 | 62.98324113 | 1.002112576  | Up   | 4.81E-12 | 1.10E-11 | AAEL004227-PA (Fragment)<br>OS=Aedes aegypti<br>GN=AAEL004227 PE=4 SV=1        |
| CCG016749.1 | 2358  | 3124  | 9325 | 56.9285203 | 138.24679   | 1.280022476  | Up   | 0        | 0        | Forkhead box transcription factor<br>subgroup K2 OS=Aedes aegypti<br>PE=2 SV=1 |
| CCG005596.1 | 4166  | 2681  | 9341 | 27.6528705 | 78.38340454 | 1.50311899   | Up   | 0        | 0        | AAEL008686-PA OS=Aedes<br>aegypti GN=AAEL008686 PE=4<br>SV=1                   |
| CCG028566.1 | 5307  | 1718  | 9349 | 13.9103079 | 61.58374403 | 2.146395225  | Up   | 2.10E-12 | 4.99E-12 | AAEL004320-PA OS=Aedes<br>aegypti GN=AAEL004320 PE=4<br>SV=1                   |
| CCG018893.1 | 1071  | 889   | 9362 | 35.6676882 | 305.5829945 | 3.098874645  | Up   | 0        | 0        | Histone H3 OS=Culex<br>quinquefasciatus<br>GN=CpipJ_CPIJ017395 PE=3<br>SV=1    |
| CCG014460.1 | 3588  | 993   | 9390 | 11.8921255 | 91.48779791 | 2.943572739  | Up   | 4.50E-12 | 1.04E-11 | AAEL013285-PA OS=Aedes<br>aegypti GN=AAEL013285 PE=4<br>SV=1                   |
| CCG007810.2 | 1560  | 65608 | 9458 | 1807.15279 | 211.9457575 | -3.091951492 | Down | 0        | 0        | AAEL007306-PA OS=Aedes<br>aegypti GN=AAEL007306 PE=4<br>SV=1                   |
| CCG017994.1 | 24512 | 15627 | 9462 | 27.3942576 | 13.49441966 | -1.021510573 | Down | 0        | 0        | AAEL003046-PA OS=Aedes<br>aegypti GN=AAEL003046 PE=4<br>SV=1                   |
| CCG024902.1 | 16796 | 1579  | 9523 | 4.03960532 | 19.82065192 | 2.294718165  | Up   | 4.25E-12 | 9.79E-12 | AAEL000172-PA OS=Aedes<br>aegypti GN=AAEL000172 PE=4<br>SV=1                   |
| CCG021676.2 | 11172 | 29112 | 9527 | 111.970544 | 29.81091146 | -1.909206858 | Down | 0        | 0        | AAEL003078-PA OS=Aedes<br>aegypti GN=AAEL003078 PE=4<br>SV=1                   |
| CCG010428.1 | 24232 | 3191  | 9528 | 5.6584856  | 13.74556211 | 1.280478008  | Up   | 0        | 0        | AAEL001141-PA OS=Aedes<br>aegypti GN=AAEL001141 PE=4<br>SV=1                   |
| CCG000136.1 | 3773  | 1152  | 9562 | 13.1198342 | 88.59555857 | 2.755484893  | Up   | 4.48E-12 | 1.03E-11 | AAEL002407-PA OS=Aedes<br>aegypti GN=AAEL002407 PE=4<br>SV=1                   |

|             |      |       |      |            |             |              |      |          |          |                                                                                                                 |
|-------------|------|-------|------|------------|-------------|--------------|------|----------|----------|-----------------------------------------------------------------------------------------------------------------|
| CCG014779.1 | 4131 | 21998 | 9573 | 228.818258 | 81.01079243 | -1.498016145 | Down | 0        | 0        | Anaphne ubiquitin-conjugating enzyme E2 binding protein OS=Culex quinquefasciatus GN=CpipJ_CPIJ005416 PE=4 SV=1 |
| CCG014650.1 | 435  | 1338  | 9576 | 132.168977 | 769.5642721 | 2.54165824   | Up   | 3.27E-12 | 7.64E-12 | CEC-A OS=Anopheles melas GN=CEC-A PE=4 SV=1                                                                     |
| CCG026177.1 | 1362 | 1841  | 9639 | 58.0817044 | 247.4029587 | 2.090707059  | Up   | 0        | 0        | AAEL001623-PA OS=Aedes aegypti GN=AAEL001623 PE=2 SV=1                                                          |
| CCG020090.1 | 6793 | 1646  | 9685 | 10.4119216 | 49.84114685 | 2.259100917  | Up   | 3.63E-12 | 8.44E-12 | AAEL001372-PA OS=Aedes aegypti GN=AAEL001372 PE=4 SV=1                                                          |
| CCG027469.1 | 2841 | 1895  | 9693 | 28.6616146 | 119.2715863 | 2.057058607  | Up   | 0        | 0        | AAEL000565-PA OS=Aedes aegypti GN=AAEL000565 PE=4 SV=1                                                          |
| CCG013234.1 | 869  | 2251  | 9699 | 111.305952 | 390.1729878 | 1.809583155  | Up   | 0        | 0        | Ribosomal protein S19 OS=Aedes albopictus PE=2 SV=1                                                             |
| CCG008472.1 | 3916 | 3084  | 9699 | 33.8403119 | 86.58333157 | 1.355346447  | Up   | 0        | 0        | AAEL004358-PA OS=Aedes aegypti GN=AAEL004358 PE=4 SV=1                                                          |
| CCG022635.1 | 6728 | 2679  | 9719 | 17.1099761 | 50.49932996 | 1.561426503  | Up   | 0        | 0        | Ubiquitin carboxyl-terminal hydrolase (Fragment) OS=Aedes aegypti GN=AAEL009824 PE=3 SV=1                       |
| CCG022647.1 | 1641 | 881   | 9722 | 23.0690653 | 207.1080846 | 3.166352414  | Up   | 4.13E-13 | 1.09E-12 | AAEL006389-PA (Fragment) OS=Aedes aegypti GN=AAEL006389 PE=3 SV=1                                               |
| CCG026483.2 | 2090 | 3886  | 9741 | 79.8949228 | 162.9323321 | 1.028097188  | Up   | 7.49E-12 | 1.68E-11 | AAEL009646-PA OS=Aedes aegypti GN=AAEL009646 PE=4 SV=1                                                          |
| CCG022035.1 | 1095 | 16390 | 9748 | 643.172557 | 311.2084767 | -1.047324494 | Down | 0        | 0        | Fructose-bisphosphate aldolase OS=Aedes aegypti GN=AAEL005766 PE=3 SV=1                                         |
| CCG010459.3 | 4605 | 63184 | 9770 | 589.576485 | 74.16772292 | -2.990815602 | Down | 0        | 0        | AAEL010975-PA OS=Aedes aegypti GN=AAEL010975 PE=4 SV=1                                                          |
| CCG018749.1 | 1473 | 16161 | 9776 | 471.441874 | 232.0109394 | -1.022887077 | Down | 0        | 0        | AAEL006866-PA OS=Aedes aegypti GN=AAEL006866 PE=4 SV=1                                                          |
| CCG005499.1 | 2661 | 326   | 9792 | 5.26423656 | 128.6401526 | 4.610972892  | Up   | 6.17E-13 | 1.58E-12 | AAEL013692-PA OS=Aedes aegypti GN=PIWI3 PE=4 SV=1                                                               |

|             |      |        |       |            |             |              |      |          |          |                                                                                                  |
|-------------|------|--------|-------|------------|-------------|--------------|------|----------|----------|--------------------------------------------------------------------------------------------------|
| CCG020968.4 | 5553 | 1047   | 9802  | 8.10180301 | 61.7073706  | 2.929127908  | Up   | 5.84E-12 | 1.32E-11 | AAEL009381-PA OS=Aedes aegypti GN=AAEL009381 PE=4 SV=1                                           |
| CCG024888.1 | 1545 | 3039   | 9894  | 84.5210508 | 223.8687316 | 1.405270428  | Up   | 0        | 0        | Putative uncharacterized protein OS=Culex quinquefasciatus GN=CpipJ_CPIJ018253 PE=4 SV=1         |
| CCG027993.1 | 692  | 1304   | 9919  | 80.9718698 | 501.085473  | 2.629564015  | Up   | 4.00E-12 | 9.24E-12 | AAEL000425-PA OS=Aedes aegypti GN=AAEL006425 PE=3 SV=1                                           |
| CCG017862.1 | 852  | 3249   | 9979  | 163.859939 | 409.4467652 | 1.32121271   | Up   | 0        | 0        | AAEL000953-PA OS=Aedes aegypti GN=AAEL006953 PE=4 SV=1                                           |
| CCG018906.1 | 2758 | 391    | 9981  | 6.09179341 | 126.5114432 | 4.376257058  | Up   | 9.02E-13 | 2.25E-12 | AAEL009508-PA OS=Aedes aegypti GN=AAEL009508 PE=4 SV=1                                           |
| CCG026342.2 | 3129 | 2900   | 10004 | 39.8249378 | 111.768169  | 1.488765361  | Up   | 0        | 0        | Putative uncharacterized protein OS=Culex quinquefasciatus GN=CpipJ_CPIJ007196 PE=3 SV=1         |
| CCG012974.1 | 4996 | 1677   | 10012 | 14.4235879 | 70.05649861 | 2.280088806  | Up   | 3.09E-12 | 7.24E-12 | Sub1 OS=Culex quinquefasciatus GN=CpipJ_CPIJ013695 PE=4 SV=1                                     |
| CCG012635.1 | 3786 | 356    | 10073 | 4.04047161 | 93.0096994  | 4.524785572  | Up   | 7.93E-13 | 1.99E-12 | AAEL013510-PA OS=Aedes aegypti GN=AAEL013510 PE=4 SV=1                                           |
| CCG024907.1 | 1628 | 3739   | 10176 | 98.687861  | 218.510703  | 1.146759403  | Up   | 1.04E-11 | 2.31E-11 | AAEL013675-PA OS=Aedes aegypti GN=AAEL013675 PE=4 SV=1                                           |
| CCG022191.1 | 2333 | 946    | 10199 | 17.4236472 | 152.8244598 | 3.132756915  | Up   | 0        | 0        | AAEL007880-PA OS=Aedes aegypti GN=AAEL007880 PE=3 SV=1                                           |
| CCG022898.1 | 4878 | 2206   | 10428 | 19.4323974 | 74.73245391 | 1.943270996  | Up   | 0        | 0        | AAEL009073-PA OS=Aedes aegypti GN=AAEL009073 PE=4 SV=1                                           |
| CCG020472.1 | 2469 | 3972   | 10436 | 69.1274953 | 147.7620804 | 1.095944525  | Up   | 1.15E-11 | 2.55E-11 | AAEL001432-PA OS=Aedes aegypti GN=AAEL001432 PE=3 SV=1                                           |
| CCG023451.1 | 1615 | 119939 | 10439 | 3191.17461 | 225.9625085 | -3.819932224 | Down | 0        | 0        | Glyceroldehyde-3-phosphate dehydrogenase OS=Culex quinquefasciatus GN=CpipJ_CPIJ005597 PE=3 SV=1 |
| CCG022045.1 | 2019 | 225    | 10452 | 4.78860341 | 180.9727136 | 5.240023422  | Up   | 0        | 0        | AAEL009903-PA (Fragment) OS=Aedes aegypti GN=AAEL009903 PE=4 SV=1                                |

|             |       |       |       |            |             |              |      |          |          |                                                                                                   |
|-------------|-------|-------|-------|------------|-------------|--------------|------|----------|----------|---------------------------------------------------------------------------------------------------|
| CCG002661.1 | 1266  | 2040  | 10468 | 69.2403307 | 289.0546929 | 2.061657976  | Up   | 0        | 0        | ATP-dependent RNA helicase<br>WM6 OS=Culex quinquefasciatus<br>GN=CpipJ_CPIJ014241 PE=4<br>SV=1   |
| CCG013870.1 | 498   | 903   | 10519 | 77.9150007 | 738.4058501 | 3.244440966  | Up   | 0        | 0        | AAEL0006860-PA OS=Aedes<br>aegypti GN=AAEL006860 PE=4<br>SV=1                                     |
| CCG013150.1 | 6030  | 2018  | 10530 | 14.3802528 | 61.04654302 | 2.085820561  | Up   | 0        | 0        | AAEL013136-PA OS=Aedes<br>aegypti GN=AAEL013136 PE=4<br>SV=1                                      |
| CCG013172.1 | 1749  | 34354 | 10612 | 844.015016 | 212.108195  | -1.992468304 | Down | 0        | 0        | AAEL000667-PA OS=Aedes<br>aegypti GN=AAEL000667 PE=4<br>SV=1                                      |
| CCG000824.1 | 6669  | 3093  | 10635 | 19.9288333 | 55.74767933 | 1.484054499  | Up   | 0        | 0        | AAEL007181-PA (Fragment)<br>OS=Aedes aegypti<br>GN=AAEL007181 PE=4 SV=1                           |
| CCG006267.1 | 7587  | 2371  | 10637 | 13.428396  | 49.01162383 | 1.867836954  | Up   | 0        | 0        | AAEL008484-PA OS=Aedes<br>aegypti GN=AAEL008484 PE=4<br>SV=1                                      |
| CCG011098.1 | 2217  | 3806  | 10638 | 73.7676184 | 167.7429627 | 1.185192679  | Up   | 4.12E-12 | 9.51E-12 | Putative uncharacterized protein<br>OS=Culex quinquefasciatus<br>GN=CpipJ_CPIJ002058 PE=4<br>SV=1 |
| CCG001421.1 | 1791  | 19136 | 10716 | 459.111581 | 209.1640949 | -1.134209605 | Down | 0        | 0        | AAEL005849-PA OS=Aedes<br>aegypti GN=AAEL005849 PE=4<br>SV=1                                      |
| CCG000166.1 | 3090  | 1440  | 10746 | 20.0247307 | 121.573347  | 2.60197223   | Up   | 1.98E-12 | 4.73E-12 | AAEL002551-PA OS=Aedes<br>aegypti GN=AAEL002551 PE=4<br>SV=1                                      |
| CCG008656.1 | 6387  | 2181  | 10840 | 14.6730846 | 59.33109758 | 2.015616285  | Up   | 0        | 0        | AAEL006038-PA (Fragment)<br>OS=Aedes aegypti<br>GN=AAEL006038 PE=4 SV=1                           |
| CCG014379.1 | 4203  | 58    | 10847 | 0.59296802 | 90.21946899 | 7.249340674  | Up   | 0        | 0        | AAEL011312-PA OS=Aedes<br>aegypti GN=AAEL011312 PE=4<br>SV=1                                      |
| CCG004880.1 | 6171  | 3660  | 10872 | 25.4852096 | 61.58910794 | 1.273015011  | Up   | 7.23E-13 | 1.82E-12 | AAEL005861-PA OS=Aedes<br>aegypti GN=AAEL005861 PE=4<br>SV=1                                      |
| CCG009668.1 | 2039  | 884   | 10911 | 18.6293504 | 187.067071  | 3.327906356  | Up   | 0        | 0        | AAEL012183-PA OS=Aedes<br>aegypti GN=AAEL012183 PE=4<br>SV=1                                      |
| CCG001360.1 | 28158 | 1781  | 10946 | 2.71784563 | 13.58950556 | 2.321957544  | Up   | 0        | 0        | AAEL001440-PA OS=Aedes<br>aegypti GN=AAEL001440 PE=4<br>SV=1                                      |
| CCG021834.1 | 2493  | 2610  | 11008 | 44.9863648 | 154.3604937 | 1.778743867  | Up   | 0        | 0        | AGAP011566-PA (Fragment)<br>OS=Anopheles gambiae<br>GN=AGAP011566 PE=4 SV=4                       |



|             |       |       |       |            |             |              |      |          |          |                                                                                                         |
|-------------|-------|-------|-------|------------|-------------|--------------|------|----------|----------|---------------------------------------------------------------------------------------------------------|
| CCG020548.1 | 2682  | 2874  | 11055 | 46.0458677 | 144.0953578 | 1.645880262  | Up   | 0        | 0        | AAEL012930-PB (Fragment)<br>OS=Aedes aegypti<br>GN=AAEL012930 PE=4 SV=1                                 |
| CCG013265.2 | 2271  | 2610  | 11111 | 49.383975  | 171.0354087 | 1.792180158  | Up   | 0        | 0        | AAEL004699-PA OS=Aedes<br>aegypti GN=AAEL004699 PE=4<br>SV=1                                            |
| CCG021922.2 | 8001  | 2853  | 11185 | 15.3221663 | 48.86993197 | 1.673326808  | Up   | 0        | 0        | Putative uncharacterized protein<br>OS=Culex quinquefasciatus<br>GN=CpipJ_CPIJ006929 PE=4<br>SV=1       |
| CCG024865.1 | 1759  | 56681 | 11199 | 1384.63191 | 222.5683579 | -2.637182093 | Down | 0        | 0        | AAEL005435-PA OS=Aedes<br>aegypti GN=AAEL005435 PE=3<br>SV=1                                            |
| CCG024101.1 | 5511  | 111   | 11265 | 0.86547642 | 71.4579909  | 6.367457031  | Up   | 0        | 0        | AAEL004462-PA OS=Aedes<br>aegypti GN=AAEL004462 PE=4<br>SV=1                                            |
| CCG025470.1 | 7088  | 3273  | 11367 | 19.8419782 | 56.0624622  | 1.498479242  | Up   | 0        | 0        | Rho guanine nucleotide exchange<br>factor OS=Culex quinquefasciatus<br>GN=CpipJ_CPIJ015585 PE=4<br>SV=1 |
| CCG013880.1 | 24238 | 4241  | 11401 | 7.51855122 | 16.44357263 | 1.128997187  | Up   | 2.01E-11 | 4.41E-11 | AAEL001421-PA OS=Aedes<br>aegypti GN=AAEL001421 PE=4<br>SV=1                                            |
| CCG020798.1 | 1776  | 1044  | 11444 | 25.2592359 | 225.2604276 | 3.15671099   | Up   | 2.08E-12 | 4.96E-12 | AAEL009487-PA OS=Aedes<br>aegypti GN=AAEL009487 PE=4<br>SV=1                                            |
| CCG004583.4 | 7200  | 1403  | 11479 | 8.37313023 | 55.73417487 | 2.734723256  | Up   | 1.72E-12 | 4.12E-12 | Putative uncharacterized protein<br>OS=Culex quinquefasciatus<br>GN=CpipJ_CPIJ010152 PE=4<br>SV=1       |
| CCG012162.1 | 16917 | 1372  | 11496 | 3.48492498 | 23.75600578 | 2.769092784  | Up   | 6.08E-12 | 1.37E-11 | Mitotin OS=Culex<br>quinquefasciatus<br>GN=CpipJ_CPIJ010145 PE=4<br>SV=1                                |
| CCG003361.1 | 4635  | 1353  | 11518 | 12.5432688 | 86.87150634 | 2.791969687  | Up   | 2.77E-12 | 6.50E-12 | AAEL005567-PA OS=Aedes<br>aegypti GN=AAEL005567 PE=2<br>SV=1                                            |
| CCG021110.1 | 822   | 3715  | 11523 | 194.2002   | 490.0537996 | 1.335395458  | Up   | 2.75E-12 | 6.47E-12 | AAEL012359-PA OS=Aedes<br>aegypti GN=AAEL012359 PE=3<br>SV=1                                            |
| CCG014982.1 | 4080  | 3804  | 11536 | 40.0629584 | 98.84281393 | 1.302867122  | Up   | 3.42E-12 | 7.96E-12 | AAEL006956-PA OS=Aedes<br>aegypti GN=AAEL006956 PE=4<br>SV=1                                            |
| CCG017228.1 | 16861 | 3443  | 11547 | 8.77437852 | 23.94064539 | 1.448093195  | Up   | 1.89E-11 | 4.16E-11 | AAEL007841-PA OS=Aedes<br>aegypti GN=AAEL007841 PE=4<br>SV=1                                            |
| CCG018955.1 | 6207  | 2394  | 11642 | 16.5731504 | 65.56859323 | 1.984157069  | Up   | 0        | 0        | AAEL005712-PA OS=Aedes<br>aegypti GN=AAEL005712 PE=4<br>SV=1                                            |

|             |       |        |       |            |             |              |      |          |          |                                                                                                        |
|-------------|-------|--------|-------|------------|-------------|--------------|------|----------|----------|--------------------------------------------------------------------------------------------------------|
| CCG015850.1 | 13899 | 1357   | 11690 | 4.1952608  | 29.40227754 | 2.809095508  | Up   | 3.94E-12 | 9.11E-12 | AAEL000416-PA OS=Aedes aegypti GN=AAEL000416 PE=4 SV=1                                                 |
| CCG002028.1 | 9225  | 2084   | 11695 | 9.70720075 | 44.31837906 | 2.190777883  | Up   | 0        | 0        | AAEL009884-PA OS=Aedes aegypti GN=AAEL009884 PE=4 SV=1                                                 |
| CCG006928.1 | 48411 | 4644   | 11703 | 4.12202697 | 8.45090399  | 1.035751731  | Up   | 1.24E-11 | 2.75E-11 | Noncatalytic domain interacting protein kinase, isoform A OS=Drosophila melanogaster GN=hipk PE=4 SV=2 |
| CCG008422.1 | 687   | 51611  | 11783 | 3228.10913 | 599.5827878 | -2.428658478 | Down | 0        | 0        | Mitochondrial ATP synthase lipid binding protein OS=Aedes albopictus PE=2 SV=1                         |
| CCG019250.1 | 2043  | 672    | 11799 | 14.1339509 | 201.8955985 | 3.836372753  | Up   | 0        | 0        | AAEL012817-PA OS=Aedes aegypti GN=AAEL012817 PE=3 SV=1                                                 |
| CCG003755.1 | 3590  | 1367   | 11818 | 16.3620132 | 115.0799206 | 2.81421396   | Up   | 1.86E-12 | 4.45E-12 | AAEL001037-PA OS=Aedes aegypti GN=AAEL001037 PE=3 SV=1                                                 |
| CCG009771.2 | 28964 | 60615  | 11859 | 89.9257859 | 14.31329251 | -2.651379287 | Down | 0        | 0        | Uncharacterized protein OS=Anopheles darlingi GN=AND_00717 PE=4 SV=1                                   |
| CCG018238.1 | 2033  | 59232  | 11883 | 1251.93474 | 204.3331052 | -2.615164489 | Down | 0        | 0        | mitochondrial cytochrome c1 OS=Culex quinquefasciatus GN=CpipJ_CPIJ014410 PE=4 SV=1                    |
| CCG018262.1 | 432   | 75481  | 11947 | 7507.86699 | 966.774381  | -2.957151943 | Down | 0        | 0        | AAEL009201-PA OS=Aedes aegypti GN=AAEL009201 PE=4 SV=1                                                 |
| CCG012826.1 | 1180  | 167776 | 11965 | 6109.56796 | 354.4710013 | -4.10733085  | Down | 0        | 0        | AAEL009185-PA OS=Aedes aegypti GN=AAEL009185 PE=2 SV=1                                                 |
| CCG011460.1 | 13700 | 158705 | 11981 | 497.774579 | 30.57190613 | -4.025214144 | Down | 0        | 0        | AAEL010850-PA OS=Aedes aegypti GN=AAEL010850 PE=4 SV=1                                                 |
| CCG025582.1 | 1830  | 2329   | 11987 | 54.6866185 | 228.9862643 | 2.066001298  | Up   | 0        | 0        | AAEL011255-PA OS=Aedes aegypti GN=AAEL011255 PE=4 SV=1                                                 |
| CCG021851.3 | 9276  | 1703   | 12097 | 7.88890233 | 45.58972338 | 2.530812174  | Up   | 5.00E-12 | 1.14E-11 | Hyperplastic discs protein OS=Culex quinquefasciatus GN=CpipJ_CPIJ011645 PE=4 SV=1                     |
| CCG014112.1 | 7421  | 3184   | 12131 | 18.4362802 | 57.14578298 | 1.632099444  | Up   | 0        | 0        | AGAP011241-PA (Fragment) OS=Anopheles gambiae GN=AGAP011241 PE=4 SV=3                                  |

|             |       |       |       |            |             |              |      |          |          |                                                                                         |
|-------------|-------|-------|-------|------------|-------------|--------------|------|----------|----------|-----------------------------------------------------------------------------------------|
| CCG006846.1 | 4269  | 2229  | 12136 | 22.4360596 | 99.3801     | 2.147137673  | Up   | 0        | 0        | Uncharacterized protein<br>OS=Anopheles darlingi<br>GN=AND_17516 PE=4 SV=1              |
| CCG026871.2 | 789   | 3333  | 12194 | 181.518537 | 540.2803891 | 1.573591432  | Up   | 9.99E-12 | 2.22E-11 | 40S ribosomal protein S4<br>OS=Aedes aegypti PE=2 SV=1                                  |
| CCG018112.1 | 1243  | 2639  | 12208 | 91.2285838 | 343.3392139 | 1.912076815  | Up   | 0        | 0        | AAEL003750-PA OS=Aedes<br>aegypti GN=AAEL003750 PE=4<br>SV=1                            |
| CCG011606.1 | 42801 | 3741  | 12218 | 3.75574816 | 9.979211364 | 1.409825478  | Up   | 6.83E-12 | 1.53E-11 | AAEL009400-PB OS=Aedes<br>aegypti GN=AAEL009400 PE=4<br>SV=1                            |
| CCG026208.1 | 95960 | 3527  | 12273 | 1.57934821 | 4.471060138 | 1.501287666  | Up   | 1.40E-11 | 3.09E-11 | AAEL007151-PA OS=Aedes<br>aegypti GN=AAEL007151 PE=4<br>SV=1                            |
| CCG015186.1 | 24333 | 51538 | 12281 | 91.0111446 | 17.64363609 | -2.36689531  | Down | 0        | 0        | AGAP001633-PA OS=Anopheles<br>gambiae GN=AgaP_AGAP001633<br>PE=4 SV=5                   |
| CCG016461.1 | 3461  | 1439  | 12323 | 17.8657752 | 124.4700505 | 2.800528226  | Up   | 3.28E-12 | 7.67E-12 | GE12944 OS=Drosophila yakuba<br>GN=GE12944 PE=4 SV=1                                    |
| CCG014657.1 | 1968  | 2449  | 12331 | 53.4719919 | 219.0398937 | 2.034338327  | Up   | 0        | 0        | PolyQ domain-containing<br>hypothetical conserved protein<br>OS=Aedes aegypti PE=2 SV=1 |
| CCG013859.1 | 58746 | 3297  | 12339 | 2.41158913 | 7.342630598 | 1.606312889  | Up   | 0        | 0        | AAEL006783-PA OS=Aedes<br>aegypti GN=AAEL006783 PE=4<br>SV=1                            |
| CCG008569.1 | 1483  | 2186  | 12367 | 63.3390694 | 291.5232696 | 2.20244347   | Up   | 0        | 0        | Uncharacterized protein<br>OS=Anopheles darlingi<br>GN=AND_10459 PE=3 SV=1              |
| CCG021882.1 | 4137  | 4928  | 12372 | 51.185606  | 104.5452744 | 1.030317781  | Up   | 1.78E-11 | 3.91E-11 | AAEL012243-PA OS=Aedes<br>aegypti GN=AAEL012243 PE=4<br>SV=1                            |
| CCG018594.1 | 4923  | 2644  | 12391 | 23.0777937 | 87.98862634 | 1.930811745  | Up   | 0        | 0        | AAEL009189-PA OS=Aedes<br>aegypti GN=AAEL009189 PE=4<br>SV=1                            |
| CCG005068.1 | 4719  | 27398 | 12400 | 249.477599 | 91.85900233 | -1.441417259 | Down | 0        | 0        | AAEL002879-PA (Fragment)<br>OS=Aedes aegypti<br>GN=AAEL002879 PE=4 SV=1                 |
| CCG011256.1 | 447   | 4777  | 12482 | 459.208998 | 976.1727308 | 1.087985539  | Up   | 2.89E-11 | 6.28E-11 | Ribosomal protein S16 OS=Aedes<br>albopictus PE=2 SV=1                                  |
| CCG000359.1 | 2235  | 466   | 12533 | 8.95923773 | 196.0322518 | 4.45157123   | Up   | 0        | 0        | AAEL007799-PA OS=Aedes<br>aegypti GN=AAEL007799 PE=4<br>SV=1                            |

|             |       |       |       |            |             |              |      |          |          |                                                                                                                 |
|-------------|-------|-------|-------|------------|-------------|--------------|------|----------|----------|-----------------------------------------------------------------------------------------------------------------|
| CCG014445.1 | 20131 | 2726  | 12596 | 5.81866259 | 21.8734516  | 1.910421399  | Up   | 0        | 0        | AAEL014969-PA (Fragment)<br>OS=Aedes aegypti<br>GN=AAEL014969 PE=4 SV=1                                         |
| CCG020936.1 | 936   | 3912  | 12606 | 179.591455 | 470.8162788 | 1.390445496  | Up   | 2.06E-11 | 4.51E-11 | AAEL013069-PA OS=Aedes<br>aegypti GN=AAEL013069 PE=2<br>SV=1                                                    |
| CCG017214.1 | 7413  | 1866  | 12773 | 10.8163395 | 60.23500192 | 2.477389724  | Up   | 0        | 0        | AAEL001440-PA OS=Aedes<br>aegypti GN=AAEL001440 PE=4<br>SV=1                                                    |
| CCG027737.1 | 10104 | 4167  | 12823 | 17.7211881 | 44.36559611 | 1.323966025  | Up   | 3.13E-11 | 6.80E-11 | Hypertrophic discs protein<br>OS=Culex quinquefasciatus<br>GN=CpipJ_CPIJ011645 PE=4<br>SV=1                     |
| CCG027733.1 | 6999  | 1204  | 12839 | 7.39185033 | 64.12763473 | 3.116938745  | Up   | 2.65E-13 | 7.40E-13 | AAEL009884-PA OS=Aedes<br>aegypti GN=AAEL009884 PE=4<br>SV=1                                                    |
| CCG021036.1 | 2285  | 3388  | 12856 | 63.7117991 | 196.6842915 | 1.626249258  | Up   | 1.69E-11 | 3.72E-11 | Uncharacterized protein<br>OS=Anopheles darlingi<br>GN=AND_14433 PE=4 SV=1                                      |
| CCG004084.1 | 3492  | 84519 | 12880 | 1040.02262 | 128.9411812 | -3.011829901 | Down | 0        | 0        | myosin heavy chain OS=Culex<br>quinquefasciatus<br>GN=CpipJ_CPIJ000853 PE=4<br>SV=1                             |
| CCG020899.1 | 876   | 4412  | 12961 | 216.418344 | 517.2308507 | 1.256985541  | Up   | 1.12E-11 | 2.49E-11 | AAEL013533-PA OS=Aedes<br>aegypti GN=AAEL013533 PE=4<br>SV=1                                                    |
| CCG022449.1 | 1734  | 7     | 13019 | 0.1734649  | 262.4693225 | 10.5632893   | Up   | 4.31E-06 | 7.70E-06 | AAEL000776-PA OS=Aedes<br>aegypti GN=AAEL000776 PE=4<br>SV=1                                                    |
| CCG008523.1 | 6612  | 0     | 13020 | 0.001      | 68.83798602 | 16.07091727  | Up   | 4.44E-16 | 1.65E-15 | AAEL008829-PA OS=Aedes<br>aegypti GN=AAEL008829 PE=4<br>SV=1                                                    |
| CCG002280.1 | 604   | 22185 | 13053 | 1578.28404 | 755.4807727 | -1.062889927 | Down | 0        | 0        | Putative uncharacterized protein<br>(Fragment) OS=Culex<br>quinquefasciatus<br>GN=CpipJ_CPIJ015860 PE=4<br>SV=1 |
| CCG002188.1 | 558   | 4540  | 13081 | 349.610386 | 819.5147284 | 1.229021836  | Up   | 2.32E-11 | 5.06E-11 | 60S ribosomal protein L27a<br>OS=Aedes albopictus PE=2 SV=1                                                     |
| CCG002680.1 | 982   | 2485  | 13087 | 108.737058 | 465.8848963 | 2.099129866  | Up   | 0        | 0        | Ribosomal protein S19 OS=Aedes<br>albopictus PE=2 SV=1                                                          |
| CCG019236.1 | 3366  | 1499  | 13127 | 19.1359573 | 136.3331251 | 2.832778161  | Up   | 1.93E-12 | 4.62E-12 | AAEL005813-PA OS=Aedes<br>aegypti GN=AAEL005813 PE=4<br>SV=1                                                    |

|             |       |        |       |            |             |              |      |          |            |                                                                                  |
|-------------|-------|--------|-------|------------|-------------|--------------|------|----------|------------|----------------------------------------------------------------------------------|
| CCG003796.1 | 5786  | 879    | 13221 | 6.52789435 | 79.87960201 | 3.613137531  | Up   | 0        | 0          | AAEL001939-PA OS=Aedes aegypti GN=AAEL001939 PE=4 SV=1                           |
| CCG005343.1 | 3975  | 1834   | 13302 | 19.8255329 | 116.9849051 | 2.560890836  | Up   | 0        | 0          | Cupis ta nonucleoprotein OS=Culex quinquefasciatus GN=CpipJ_CPIJ008950 PE=4 SV=1 |
| CCG009349.1 | 2520  | 4034   | 13333 | 68.7856783 | 184.9598033 | 1.427031646  | Up   | 2.35E-11 | 5.12E-11   | AGAP001546-PA OS=Anopheles gambiae GN=AgaP_AGAP001546 PE=3 SV=4                  |
| CCG019635.1 | 4698  | 3300   | 13336 | 30.1830831 | 99.2344783  | 1.717101284  | Up   | 0        | 0          | AAEL014034-PA OS=Aedes aegypti GN=AAEL014034 PE=4 SV=1                           |
| CCG025338.1 | 747   | 24996  | 13453 | 1437.8467  | 629.5765695 | -1.191456114 | Down | 0        | 0          | 14-3-3 zeta OS=Culex pipiens PE=2 SV=1                                           |
| CCG023524.1 | 4298  | 4711   | 13533 | 47.0987482 | 110.0722102 | 1.224689659  | Up   | 1.20E-11 | 2.65E-11   | Uncharacterized protein OS=Anopheles darlingi GN=AND_09747 PE=4 SV=1             |
| CCG021617.1 | 3497  | 2520   | 13652 | 30.9647501 | 136.4742335 | 2.139929885  | Up   | 0        | 0          | AAEL002370-PA OS=Aedes aegypti GN=AAEL002370 PE=4 SV=1                           |
| CCG025005.1 | 2519  | 3199   | 13714 | 54.5693454 | 190.3206858 | 1.802269734  | Up   | 0        | 0          | AAEL011704-PA OS=Aedes aegypti GN=AAEL011704 PE=3 SV=1                           |
| CCG010286.1 | 3675  | 1536   | 13780 | 17.9595952 | 131.0816473 | 2.867638971  | Up   | 2.61E-12 | 6.14E-12   | AAEL014711-PA OS=Aedes aegypti GN=Aael_AAEL014711 PE=4 SV=1                      |
| CCG002118.1 | 5345  | 35805  | 13823 | 287.844967 | 90.40753224 | -1.670777106 | Down | 0        | 0          | Ubiquitin C variant (Fragment) OS=Homo sapiens PE=2 SV=1                         |
| CCG019619.1 | 1769  | 119868 | 13841 | 2911.64282 | 273.5203555 | -3.412113279 | Down | 0        | 0          | ATP synthase subunit beta OS=Aedes aegypti GN=AAEL003393 PE=3 SV=1               |
| CCG000263.3 | 35854 | 3623   | 13873 | 4.34203571 | 13.52641752 | 1.639336293  | Up   | 7.40E-12 | 1.66E-11   | AAEL004381-PA OS=Aedes aegypti GN=AAEL004381 PE=4 SV=1                           |
| CCG011939.1 | 3028  | 2924   | 13917 | 41.4938917 | 160.6718421 | 1.953146239  | Up   | 0        | 0          | AAEL012827-PA OS=Aedes aegypti GN=AAEL012827 PE=3 SV=1                           |
| CCG018919.1 | 969   | 2      | 13919 | 0.08868882 | 502.1509333 | 12.46708115  | Up   | 9.36E-05 | 0.00015347 | AAEL000923-PA OS=Aedes aegypti GN=AAEL000923 PE=4 SV=1                           |
| CCG018800.1 | 3708  | 1657   | 13951 | 19.2019553 | 131.5272166 | 2.776036233  | Up   | 2.91E-12 | 6.82E-12   | AAEL004035-PA OS=Aedes aegypti GN=AAEL004035 PE=4 SV=1                           |

|             |       |       |       |            |             |              |      |          |          |                                                                                                     |
|-------------|-------|-------|-------|------------|-------------|--------------|------|----------|----------|-----------------------------------------------------------------------------------------------------|
| CCG010188.1 | 2130  | 3288  | 13993 | 66.3307453 | 229.6578248 | 1.791736299  | Up   | 5.95E-12 | 1.34E-11 | AAEL001352-PA OS=Aedes aegypti GN=AAEL001352 PE=4 SV=1                                              |
| CCG027392.1 | 1728  | 23724 | 13996 | 589.938648 | 283.1458575 | -1.059019503 | Down | 0        | 0        | AAEL002833-PA OS=Aedes aegypti GN=AAEL002833 PE=3 SV=1                                              |
| CCG022750.1 | 1920  | 13    | 13998 | 0.29094091 | 254.8676866 | 9.774806578  | Up   | 6.34E-08 | 1.23E-07 | AAEL002652-PA OS=Aedes aegypti GN=AAEL002652 PE=4 SV=1                                              |
| CCG008471.1 | 5263  | 1165  | 14079 | 9.51163611 | 93.51654545 | 3.29745621   | Up   | 1.90E-12 | 4.56E-12 | AAEL004356-PA OS=Aedes aegypti GN=AAEL004356 PE=4 SV=1                                              |
| CCG027950.1 | 13592 | 1280  | 14202 | 4.04659066 | 36.52718119 | 3.1741916    | Up   | 2.19E-12 | 5.20E-12 | AGAP005719-PA OS=Anopheles gambiae GN=AGAP005719 PE=4 SV=4                                          |
| CCG014060.1 | 4620  | 2196  | 14262 | 20.4245752 | 107.9166544 | 2.401539553  | Up   | 0        | 0        | AAEL008027-PA OS=Aedes aegypti GN=AAEL008027 PE=4 SV=1                                              |
| CCG001272.1 | 5666  | 2516  | 14262 | 19.080807  | 87.99416578 | 2.205285686  | Up   | 0        | 0        | AAEL000604-PA OS=Aedes aegypti GN=AAEL000604 PE=4 SV=1                                              |
| CCG016448.1 | 1579  | 909   | 14295 | 24.7368517 | 316.4842093 | 3.677399719  | Up   | 2.27E-12 | 5.39E-12 | Basic helix-loop-helix transcription factor OS=Culex quinquefasciatus GN=CpipJ_CPIJ008846 PE=4 SV=1 |
| CCG018567.2 | 4347  | 3916  | 14304 | 38.7093353 | 115.03179   | 1.571279175  | Up   | 7.60E-12 | 1.70E-11 | Helix-loop-helix transcription factor OS=Culex quinquefasciatus GN=CpipJ_CPIJ009239 PE=4 SV=1       |
| CCG002354.1 | 585   | 4227  | 14331 | 310.483877 | 856.3881443 | 1.463746469  | Up   | 1.15E-11 | 2.55E-11 | 40S ribosomal protein S17 OS=Aedes aegypti GN=AAEL004175 PE=2 SV=2                                  |
| CCG000933.1 | 6377  | 961   | 14420 | 6.47544534 | 79.04945132 | 3.609704127  | Up   | 1.90E-12 | 4.55E-12 | AAEL002455-PA OS=Aedes aegypti GN=AAEL002455 PE=4 SV=1                                              |
| CCG001877.1 | 4150  | 1716  | 14492 | 17.7677264 | 122.0759872 | 2.780448457  | Up   | 1.20E-14 | 4.28E-14 | Ubiquitin carboxyl-terminal hydrolase OS=Aedes aegypti GN=AAEL002698 PE=3 SV=1                      |
| CCG003480.1 | 4128  | 2699  | 14575 | 28.094795  | 123.4294777 | 2.135312205  | Up   | 0        | 0        | AAEL011704-PA OS=Aedes aegypti GN=AAEL011704 PE=3 SV=1                                              |
| CCG012249.1 | 3181  | 92252 | 14638 | 1246.16283 | 160.8674176 | -2.953548534 | Down | 0        | 0        | AAEL012897-PA OS=Aedes aegypti GN=AAEL012897 PE=4 SV=1                                              |

|             |       |      |       |            |             |             |    |          |          |                                                                        |
|-------------|-------|------|-------|------------|-------------|-------------|----|----------|----------|------------------------------------------------------------------------|
| CCG022705.1 | 4995  | 1385 | 14737 | 11.914531  | 103.1391641 | 3.113798188 | Up | 7.34E-12 | 1.64E-11 | AAEL012568-PA OS=Aedes aegypti GN=AAEL012568 PE=4 SV=1                 |
| CCG006686.1 | 3507  | 5631 | 14758 | 68.9941761 | 147.1098513 | 1.092347369 | Up | 1.24E-11 | 2.75E-11 | AAEL003976-PA OS=Aedes aegypti GN=AAEL003976 PE=4 SV=1                 |
| CCG003600.1 | 7932  | 2430 | 14772 | 13.1639505 | 65.10384071 | 2.306150153 | Up | 0        | 0        | AAEL009391-PA OS=Aedes aegypti GN=AAEL009391 PE=4 SV=1                 |
| CCG007312.1 | 24630 | 5257 | 14778 | 9.1714127  | 20.97496606 | 1.193452597 | Up | 4.30E-11 | 9.28E-11 | Cinfefer OS=Culex quinquefasciatus GN=CpipJ_CPIJ009239 PE=4 SV=1       |
| CCG009037.1 | 32742 | 1411 | 14818 | 1.85175907 | 15.8210172  | 3.09487405  | Up | 6.09E-12 | 1.37E-11 | AGAP012403-PA (Fragment) OS=Anopheles gambiae GN=AGAP012403 PE=4 SV=4  |
| CCG014351.1 | 11145 | 3050 | 14824 | 11.7593262 | 46.49811529 | 1.983366843 | Up | 0        | 0        | AAEL012446-PA OS=Aedes aegypti GN=IAP6 PE=4 SV=2                       |
| CCG016498.1 | 3826  | 5913 | 14839 | 66.4087927 | 135.5843881 | 1.029744894 | Up | 0        | 0        | AGAP010331-PA OS=Anopheles gambiae GN=AGAP010331 PE=3 SV=3             |
| CCG008592.1 | 3446  | 4565 | 14859 | 56.9230524 | 150.7385475 | 1.404963465 | Up | 1.55E-11 | 3.42E-11 | Uncharacterized protein OS=Anopheles darlingi GN=AND_02441 PE=3 SV=1   |
| CCG025588.1 | 60860 | 3336 | 14907 | 2.35535713 | 8.562652511 | 1.862111958 | Up | 0        | 0        | AAEL002435-PA OS=Aedes aegypti GN=AAEL002435 PE=4 SV=1                 |
| CCG019910.1 | 3690  | 2389 | 15021 | 27.8197008 | 142.3057657 | 2.354815306 | Up | 0        | 0        | Uncharacterized protein OS=Anopheles darlingi GN=AND_00689 PE=4 SV=1   |
| CCG018886.1 | 339   | 5581 | 15090 | 707.416191 | 1556.107364 | 1.137310458 | Up | 6.47E-12 | 1.46E-11 | AAEL011414-PA OS=Aedes aegypti GN=AAEL011414 PE=4 SV=1                 |
| CCG012846.1 | 9297  | 3735 | 15116 | 17.2627685 | 56.83869116 | 1.719209479 | Up | 1.99E-11 | 4.35E-11 | AAEL000172-PA OS=Aedes aegypti GN=AAEL000172 PE=4 SV=1                 |
| CCG001809.1 | 6930  | 1368 | 15141 | 8.48233722 | 76.37853804 | 3.170633561 | Up | 4.04E-12 | 9.34E-12 | AAEL003882-PA OS=Aedes aegypti GN=AAEL003882 PE=4 SV=1                 |
| CCG013403.1 | 5103  | 4565 | 15144 | 38.4395137 | 103.7444921 | 1.432372755 | Up | 1.55E-11 | 3.42E-11 | Protein kinase OS=Culex quinquefasciatus GN=CpipJ_CPIJ014503 PE=4 SV=1 |

|             |       |       |       |            |             |              |      |          |          |                                                                                                  |
|-------------|-------|-------|-------|------------|-------------|--------------|------|----------|----------|--------------------------------------------------------------------------------------------------|
| CCG017490.1 | 17590 | 5760  | 15193 | 14.070817  | 30.19449113 | 1.101579259  | Up   | 2.89E-11 | 6.28E-11 | Nuclear receptor co-repressor 1<br>OS=Culex quinquefasciatus<br>GN=CpipJ_CPIJ002507 PE=4<br>SV=1 |
| CCG005737.1 | 1189  | 1080  | 15310 | 39.0305411 | 450.1355907 | 3.527684269  | Up   | 6.28E-12 | 1.41E-11 | AAEL000823-PA OS=Aedes<br>aegypti GN=AAEL000823 PE=4<br>SV=1                                     |
| CCG013157.1 | 31843 | 4345  | 15325 | 5.86325085 | 16.82428137 | 1.520772196  | Up   | 2.71E-12 | 6.38E-12 | AGAP003043-PA OS=Anopheles<br>gambiae GN=AgaP_AGAP003043<br>PE=4 SV=5                            |
| CCG005186.1 | 3885  | 3590  | 15431 | 39.7069105 | 138.8522957 | 1.806089013  | Up   | 7.25E-12 | 1.62E-11 | AAEL003126-PA OS=Aedes<br>aegypti GN=AAEL003126 PE=4<br>SV=1                                     |
| CCG016139.1 | 586   | 4661  | 15527 | 341.778043 | 926.2750229 | 1.438380897  | Up   | 1.41E-11 | 3.11E-11 | 40S ribosomal protein S17<br>OS=Aedes aegypti<br>GN=AAEL004175 PE=2 SV=2                         |
| CCG006475.1 | 369   | 4317  | 15557 | 502.71096  | 1473.837159 | 1.551776085  | Up   | 1.51E-11 | 3.33E-11 | 40S ribosomal protein S21<br>OS=Aedes aegypti<br>GN=AAEL000529 PE=3 SV=1                         |
| CCG027712.1 | 1076  | 6103  | 15716 | 243.721459 | 510.5987711 | 1.066956781  | Up   | 6.56E-12 | 1.47E-11 | AAEL011711-PA OS=Aedes<br>aegypti GN=AAEL011711 PE=4<br>SV=1                                     |
| CCG026788.1 | 2058  | 4261  | 15749 | 88.9669772 | 267.5208459 | 1.588309473  | Up   | 1.77E-11 | 3.90E-11 | AAEL008958-PA OS=Aedes<br>aegypti GN=FoxK1 PE=2 SV=1                                             |
| CCG014615.1 | 543   | 3561  | 15770 | 281.795994 | 1015.270764 | 1.849141523  | Up   | 1.92E-11 | 4.23E-11 | CEC-A OS=Anopheles melas<br>GN=CEC-A PE=4 SV=1                                                   |
| CCG016790.1 | 492   | 1805  | 15858 | 157.64303  | 1126.764945 | 2.837453292  | Up   | 0        | 0        | AAEL005722-PA OS=Aedes<br>aegypti GN=AAEL005722 PE=4<br>SV=1                                     |
| CCG004790.1 | 2449  | 3192  | 15884 | 56.0062854 | 226.7363284 | 2.017354913  | Up   | 0        | 0        | AAEL009955-PA OS=Aedes<br>aegypti GN=AAEL009955 PE=4<br>SV=1                                     |
| CCG026417.1 | 3048  | 3552  | 15896 | 50.0749663 | 182.3152125 | 1.864273495  | Up   | 7.46E-12 | 1.67E-11 | AAEL010312-PA OS=Aedes<br>aegypti GN=AAEL010312 PE=4<br>SV=1                                     |
| CCG015624.1 | 21671 | 4366  | 15987 | 8.65700066 | 25.78921004 | 1.574828407  | Up   | 1.40E-11 | 3.10E-11 | AAEL007841-PA OS=Aedes<br>aegypti GN=AAEL007841 PE=4<br>SV=1                                     |
| CCG022109.1 | 3789  | 574   | 16030 | 6.50953488 | 147.8968532 | 4.505893082  | Up   | 3.10E-13 | 8.52E-13 | AAEL013510-PA OS=Aedes<br>aegypti GN=AAEL013510 PE=4<br>SV=1                                     |
| CCG014981.1 | 1155  | 87782 | 16120 | 3265.77424 | 487.9025295 | -2.742760193 | Down | 0        | 0        | AAEL008844-PA OS=Aedes<br>aegypti GN=AAEL008844 PE=4<br>SV=1                                     |



|             |       |       |       |            |             |              |      |          |          |                                                                         |
|-------------|-------|-------|-------|------------|-------------|--------------|------|----------|----------|-------------------------------------------------------------------------|
| CCG008776.1 | 1392  | 745   | 16225 | 22.9974514 | 407.4698568 | 4.147147446  | Up   | 0        | 0        | AAEL014238-PA OS=Aedes aegypti GN=AAEL014238 PE=3 SV=1                  |
| CCG026834.1 | 3979  | 3108  | 16359 | 33.5636932 | 143.7251696 | 2.098339356  | Up   | 0        | 0        | AAEL001791-PA (Fragment) OS=Aedes aegypti GN=AAEL001791 PE=4 SV=1       |
| CCG002544.1 | 913   | 3111  | 16365 | 146.417135 | 626.6070092 | 2.097476506  | Up   | 0        | 0        | 60S ribosomal protein L11 OS=Aedes albopictus PE=2 SV=1                 |
| CCG008753.1 | 1158  | 3560  | 16484 | 132.100393 | 497.6271453 | 1.913430426  | Up   | 1.18E-11 | 2.61E-11 | 60S ribosomal protein L2/L8 OS=Aedes aegypti GN=AAEL000987 PE=2 SV=1    |
| CCG022670.1 | 1593  | 4428  | 16563 | 119.441296 | 363.4739097 | 1.605550084  | Up   | 8.68E-12 | 1.94E-11 | Putative 56 kDa salivary secreted protein OS=Aedes albopictus PE=2 SV=1 |
| CCG009249.1 | 813   | 3200  | 16600 | 169.130567 | 713.785233  | 2.077352635  | Up   | 0        | 0        | 40S ribosomal protein S3a (Fragment) OS=Aedes triseriatus PE=2 SV=1     |
| CCG013173.1 | 5250  | 34632 | 16661 | 283.452924 | 110.9409237 | -1.353317507 | Down | 0        | 0        | Uncharacterized protein OS=Anopheles darlingi GN=AND_20280 PE=4 SV=1    |
| CCG023200.1 | 13842 | 56992 | 16940 | 176.920323 | 42.78234421 | -2.048012343 | Down | 0        | 0        | AAEL005324-PA OS=Aedes aegypti GN=AAEL005324 PE=4 SV=1                  |
| CCG027241.1 | 3390  | 1310  | 17096 | 16.6048237 | 176.2969616 | 3.4083333    | Up   | 2.61E-12 | 6.14E-12 | Importin-7 OS=Culex quinquefasciatus GN=CpipJ_CPIJ002096 PE=4 SV=1      |
| CCG026048.1 | 711   | 32500 | 17324 | 1964.15805 | 851.7822599 | -1.205354437 | Down | 0        | 0        | 60S ribosomal protein L13a (Fragment) OS=Aedes aegypti PE=2 SV=1        |
| CCG018788.1 | 930   | 6200  | 17370 | 286.464897 | 652.9303952 | 1.188570837  | Up   | 0        | 0        | AAEL009653-PA OS=Aedes aegypti GN=AAEL009653 PE=4 SV=1                  |
| CCG027185.1 | 9328  | 30266 | 17392 | 139.421311 | 65.17949717 | -1.09696097  | Down | 0        | 0        | AAEL007019-PA OS=Aedes aegypti GN=AAEL007019 PE=4 SV=1                  |
| CCG018795.1 | 807   | 1663  | 17476 | 88.5485361 | 757.0394608 | 3.095828141  | Up   | 3.33E-12 | 7.77E-12 | AAEL006820-PA OS=Aedes aegypti GN=AAEL006820 PE=4 SV=1                  |

|             |       |        |       |            |             |              |      |          |          |                                                                                                |
|-------------|-------|--------|-------|------------|-------------|--------------|------|----------|----------|------------------------------------------------------------------------------------------------|
| CCG014475.1 | 5517  | 48764  | 17835 | 379.803542 | 113.0108512 | -1.748792052 | Down | 0        | 0        | AGAP003649-PA OS=Anopheles gambiae GN=AgaP_AGAP003649 PE=4 SV=1                                |
| CCG005442.1 | 606   | 4101   | 17914 | 290.790234 | 1033.403581 | 1.829353066  | Up   | 3.05E-11 | 6.63E-11 | Ribosomal protein S5 OS=Aedes albopictus PE=2 SV=1                                             |
| CCG013505.1 | 8618  | 5565   | 18103 | 27.7473397 | 73.43347464 | 1.404088409  | Up   | 1.26E-11 | 2.79E-11 | Thyroid hormone receptor interactor 12 OS=Culex quinquefasciatus GN=CqipJ_CPIJ013812 PE=4 SV=1 |
| CCG019329.1 | 14154 | 5311   | 18249 | 16.1235171 | 45.07231827 | 1.483075179  | Up   | 1.58E-11 | 3.49E-11 | AAEL007132-PA OS=Aedes aegypti GN=AAEL007132 PE=4 SV=1                                         |
| CCG015704.1 | 10974 | 3169   | 18442 | 12.4085191 | 58.74799893 | 2.243208761  | Up   | 0        | 0        | AAEL013136-PA OS=Aedes aegypti GN=AAEL013136 PE=4 SV=1                                         |
| CCG008638.3 | 2804  | 2145   | 18444 | 32.8709275 | 229.9466679 | 2.806415222  | Up   | 0        | 0        | Putative uncharacterized protein OS=Culex quinquefasciatus GN=CqipJ_CPIJ003009 PE=4 SV=1       |
| CCG014921.1 | 981   | 4      | 18505 | 0.17520789 | 659.432122  | 11.87794072  | Up   | 2.95E-05 | 5.02E-05 | AAEL000442-PA OS=Aedes aegypti GN=AAEL000442 PE=4 SV=1                                         |
| CCG013291.2 | 2727  | 6110   | 18543 | 96.2761564 | 237.7085905 | 1.30394359   | Up   | 3.97E-12 | 9.17E-12 | AAEL011387-PA (Fragment) OS=Aedes aegypti GN=AAEL011387 PE=4 SV=1                              |
| CCG022771.1 | 27312 | 1533   | 18573 | 2.41185571 | 23.77270337 | 3.301090467  | Up   | 5.99E-12 | 1.35E-11 | AAEL003882-PA OS=Aedes aegypti GN=AAEL003882 PE=4 SV=1                                         |
| CCG010187.2 | 9057  | 4738   | 18583 | 22.4788123 | 71.72680327 | 1.673946526  | Up   | 2.77E-11 | 6.03E-11 | Thyroid hormone receptor interactor 12 OS=Culex quinquefasciatus GN=CqipJ_CPIJ013812 PE=4 SV=1 |
| CCG025714.1 | 2421  | 6524   | 18596 | 115.792874 | 268.5188413 | 1.213476848  | Up   | 2.85E-11 | 6.19E-11 | AAEL011704-PA OS=Aedes aegypti GN=AAEL011704 PE=3 SV=1                                         |
| CCG013849.1 | 1973  | 553    | 18828 | 12.0437219 | 333.6008287 | 4.791769671  | Up   | 7.29E-13 | 1.83E-12 | AAEL010094-PA OS=Aedes aegypti GN=AAEL010094 PE=3 SV=1                                         |
| CCG007885.1 | 3489  | 136725 | 18901 | 1683.87417 | 189.3798765 | -3.152429388 | Down | 0        | 0        | Phosphorylase OS=Aedes aegypti GN=AAEL000703 PE=3 SV=1                                         |
| CCG019897.1 | 29638 | 3482   | 18997 | 5.04826965 | 22.40712544 | 2.150096702  | Up   | 1.80E-11 | 3.95E-11 | Putative uncharacterized protein OS=Culex quinquefasciatus GN=CqipJ_CPIJ002396 PE=4 SV=1       |

|             |       |        |       |            |             |              |      |          |          |                                                                                                   |
|-------------|-------|--------|-------|------------|-------------|--------------|------|----------|----------|---------------------------------------------------------------------------------------------------|
| CCG023764.1 | 1164  | 979    | 19397 | 36.1403524 | 582.5478476 | 4.010694072  | Up   | 2.06E-12 | 4.91E-12 | Peptidyl-prolyl cis-trans isomerase OS=Culex quinquefasciatus GN=CpipJ_CPIJ009378 PE=4 SV=1       |
| CCG025358.4 | 10698 | 7022   | 19662 | 28.2046622 | 64.25029332 | 1.187769381  | Up   | 0        | 0        | Chromodomain helicase DNA binding protein OS=Culex quinquefasciatus GN=CpipJ_CPIJ003506 PE=4 SV=1 |
| CCG000253.1 | 6548  | 4298   | 20020 | 28.2046303 | 106.8822085 | 1.92201779   | Up   | 0        | 0        | AAEL007417-PA OS=Aedes aegypti GN=AAEL007417 PE=4 SV=1                                            |
| CCG010133.1 | 3276  | 48702  | 20213 | 638.800981 | 215.6934214 | -1.566384354 | Down | 0        | 0        | Elongation factor 1-alpha OS=Culex quinquefasciatus GN=CpipJ_CPIJ009655 PE=3 SV=1                 |
| CCG005443.1 | 936   | 6240   | 20386 | 286.464897 | 761.3882802 | 1.410273997  | Up   | 9.71E-12 | 2.16E-11 | 60S ribosomal protein L27 OS=Aedes aegypti GN=AAEL011587 PE=3 SV=1                                |
| CCG019944.1 | 411   | 4689   | 20808 | 490.231352 | 1769.85845  | 1.852099324  | Up   | 1.17E-11 | 2.60E-11 | 60S ribosomal protein L27 OS=Aedes aegypti GN=AAEL011587 PE=3 SV=1                                |
| CCG021934.1 | 2134  | 103537 | 20814 | 2084.79729 | 340.9660603 | -2.612207066 | Down | 0        | 0        | ATP synthase subunit beta OS=Aedes aegypti GN=AAEL002827 PE=3 SV=1                                |
| CCG025223.1 | 832   | 5212   | 20968 | 269.180597 | 881.0158021 | 1.710593474  | Up   | 1.95E-11 | 4.28E-11 | Ribosomal protein L26 OS=Aedes albopictus PE=2 SV=1                                               |
| CCG017609.3 | 18332 | 7481   | 21130 | 17.5352708 | 40.29393346 | 1.200302935  | Up   | 0        | 0        | AAEL005380-PA OS=Aedes aegypti GN=AAEL005380 PE=4 SV=1                                            |
| CCG009781.1 | 1308  | 120724 | 21651 | 3965.96196 | 578.655696  | -2.776893744 | Down | 0        | 0        | AAEL006572-PA OS=Aedes aegypti GN=AAEL006572 PE=4 SV=1                                            |
| CCG018689.1 | 7050  | 4214   | 21793 | 25.6843208 | 108.0632235 | 2.072915794  | Up   | 1.83E-11 | 4.03E-11 | Putative uncharacterized protein OS=Culex quinquefasciatus GN=CpipJ_CPIJ002709 PE=4 SV=1          |
| CCG007854.1 | 1266  | 3359   | 21867 | 114.008956 | 603.8172497 | 2.404964809  | Up   | 1.30E-11 | 2.87E-11 | Ribosomal protein S2 OS=Aedes albopictus PE=2 SV=1                                                |
| CCG005414.1 | 8407  | 3249   | 21958 | 16.606241  | 91.3065114  | 2.45899221   | Up   | 0        | 0        | AAEL003780-PA OS=Aedes aegypti GN=AAEL003780 PE=4 SV=1                                            |

|             |      |       |       |            |             |              |      |          |          |                                                                                               |
|-------------|------|-------|-------|------------|-------------|--------------|------|----------|----------|-----------------------------------------------------------------------------------------------|
| CCG004829.1 | 1812 | 48    | 22157 | 1.13827112 | 427.4671846 | 8.55282564   | Up   | 5.35E-14 | 1.80E-13 | AAEL010097-PA OS=Aedes aegypti GN=AAEL010097 PE=4 SV=1                                        |
| CCG008758.2 | 5703 | 1299  | 22275 | 9.78742509 | 136.5414019 | 3.8022653    | Up   | 7.92E-13 | 1.99E-12 | AAEL006249-PA OS=Aedes aegypti GN=AAEL006249 PE=4 SV=1                                        |
| CCG025396.1 | 1353 | 5970  | 22582 | 189.600381 | 583.4647495 | 1.621683633  | Up   | 2.89E-11 | 6.29E-11 | GL12416 OS=Drosophila persimilis GN=GL12416 PE=3 SV=1                                         |
| CCG027283.1 | 4936 | 7280  | 22611 | 63.3751353 | 160.1380867 | 1.337327647  | Up   | 0        | 0        | Ubiquitin carboxyl-terminal hydrolase OS=Culex quinquefasciatus GN=CpipJ_CPIJ010988 PE=3 SV=1 |
| CCG001497.1 | 1221 | 7861  | 22611 | 276.64626  | 647.3723146 | 1.226553247  | Up   | 5.39E-13 | 1.39E-12 | AAEL003203-PA OS=Aedes aegypti GN=AAEL003203 PE=3 SV=1                                        |
| CCG005199.1 | 819  | 3256  | 22634 | 170.829616 | 966.1118882 | 2.499632167  | Up   | 0        | 0        | AAEL006425-PA OS=Aedes aegypti GN=AAEL006425 PE=3 SV=1                                        |
| CCG007782.1 | 2946 | 7600  | 22667 | 110.851997 | 268.9746299 | 1.278835342  | Up   | 9.81E-12 | 2.18E-11 | AAEL008738-PA OS=Aedes aegypti GN=AAEL008738 PE=3 SV=1                                        |
| CCG006238.1 | 3465 | 5960  | 23214 | 73.9104237 | 234.2053209 | 1.663924103  | Up   | 2.26E-11 | 4.93E-11 | Uncharacterized protein OS=Anopheles darlingi GN=AND_09747 PE=4 SV=1                          |
| CCG025735.1 | 5682 | 13    | 23503 | 0.09831161 | 144.6012635 | 10.52243078  | Up   | 6.34E-08 | 1.23E-07 | AAEL000961-PA OS=Aedes aegypti GN=AAEL000961 PE=4 SV=1                                        |
| CCG016378.1 | 715  | 9295  | 23640 | 558.60655  | 1155.823305 | 1.049016469  | Up   | 0        | 0        | 40S ribosomal protein S20 OS=Aedes albopictus PE=2 SV=1                                       |
| CCG021917.1 | 641  | 6362  | 23720 | 426.479644 | 1293.619852 | 1.600864937  | Up   | 0        | 0        | AAEL002372-PB OS=Aedes aegypti GN=RpS11 PE=2 SV=1                                             |
| CCG022267.1 | 5172 | 1959  | 23897 | 16.2756593 | 161.5231903 | 3.310953417  | Up   | 0        | 0        | AAEL014711-PA OS=Aedes aegypti GN=Aael_AAEL014711 PE=4 SV=1                                   |
| CCG009594.1 | 1155 | 1902  | 24121 | 70.76055   | 730.0680468 | 3.367013772  | Up   | 0        | 0        | AAEL010576-PA OS=Aedes aegypti GN=AAEL010576 PE=4 SV=1                                        |
| CCG020485.1 | 1424 | 50708 | 24162 | 1530.13294 | 593.161435  | -1.367160292 | Down | 0        | 0        | -                                                                                             |
| CCG011345.1 | 789  | 9941  | 25081 | 541.396872 | 1111.265576 | 1.037445185  | Up   | 4.74E-12 | 1.08E-11 | 40S ribosomal protein S4 OS=Aedes aegypti PE=2 SV=1                                           |
| CCG025006.1 | 8032 | 2576  | 25165 | 13.78113   | 109.5275193 | 2.990527303  | Up   | 0        | 0        | AAEL011704-PA OS=Aedes aegypti GN=AAEL011704 PE=3 SV=1                                        |

|             |       |       |       |            |             |              |      |          |          |                                                                                        |
|-------------|-------|-------|-------|------------|-------------|--------------|------|----------|----------|----------------------------------------------------------------------------------------|
| CCG002238.1 | 835   | 1739  | 25604 | 89.4902617 | 1071.942178 | 3.58235258   | Up   | 4.99E-12 | 1.13E-11 | Ribosomal protein L26 OS=Aedes albopictus PE=2 SV=1                                    |
| CCG014731.1 | 35249 | 3487  | 25605 | 4.25077207 | 25.3938176  | 2.578680494  | Up   | 1.24E-11 | 2.74E-11 | AAEL001147-PA OS=Aedes aegypti GN=AAEL001147 PE=4 SV=1                                 |
| CCG027724.1 | 447   | 6502  | 25829 | 625.0318   | 2019.994029 | 1.692349532  | Up   | 2.60E-11 | 5.67E-11 | 60S ribosomal protein L18a OS=Aedes albopictus PE=2 SV=1                               |
| CCG007059.1 | 1143  | 9081  | 26027 | 341.389466 | 796.0271825 | 1.221399152  | Up   | 1.58E-11 | 3.49E-11 | Ribosomal protein L23a OS=Aedes albopictus PE=2 SV=1                                   |
| CCG006597.1 | 710   | 9839  | 26095 | 595.463689 | 1284.839764 | 1.109503008  | Up   | 0        | 0        | Ribosomal protein L24 OS=Aedes albopictus PE=2 SV=1                                    |
| CCG002564.1 | 978   | 5760  | 26258 | 253.073284 | 938.5832633 | 1.890929521  | Up   | 2.89E-11 | 6.28E-11 | Ribosomal protein L7AE OS=Aedes aegypti PE=2 SV=1                                      |
| CCG007855.1 | 4890  | 7181  | 26365 | 63.1013628 | 188.4815884 | 1.578680533  | Up   | 8.16E-12 | 1.83E-11 | AAEL010159-PA OS=Aedes aegypti GN=AAEL010159 PE=4 SV=1                                 |
| CCG013071.1 | 1207  | 3507  | 26595 | 124.850753 | 770.2695698 | 2.625158905  | Up   | 1.79E-11 | 3.93E-11 | Putative salivary secreted peptide of the 13 kDa family OS=Aedes triseriatus PE=2 SV=1 |
| CCG008270.1 | 577   | 6949  | 26623 | 517.498589 | 1612.988219 | 1.640109068  | Up   | 1.69E-12 | 4.05E-12 | Ubiquitin OS=Anopheles stephensi GN=Ubi-p63E PE=2 SV=1                                 |
| CCG027422.1 | 940   | 8370  | 26964 | 382.613488 | 1002.781888 | 1.390048206  | Up   | 0        | 0        | AAEL000269-PA OS=Aedes aegypti GN=AAEL000269 PE=4 SV=1                                 |
| CCG023199.2 | 13053 | 2064  | 27293 | 6.79457077 | 73.09555259 | 3.42732931   | Up   | 0        | 0        | AGAP000029-PA OS=Anopheles gambiae GN=AgaP_AGAP000029 PE=4 SV=5                        |
| CCG022904.1 | 9326  | 9917  | 28144 | 45.6927791 | 105.4970771 | 1.207164931  | Up   | 0        | 0        | Mitochondrial phosphate carrier protein OS=Aedes aegypti PE=2 SV=1                     |
| CCG007010.1 | 784   | 58379 | 28439 | 3199.65579 | 1268.084736 | -1.335265558 | Down | 0        | 0        | Putative uncharacterized protein OS=Daphnia pulex GN=DAPPUDRAFT_67491 PE=4 SV=1        |
| CCG011189.1 | 9303  | 4375  | 28942 | 20.2077382 | 108.7565781 | 2.428122903  | Up   | 3.03E-11 | 6.59E-11 | AAEL015015-PA OS=Aedes aegypti GN=AAEL015015 PE=4 SV=1                                 |

|             |      |       |       |            |             |             |    |          |          |                                                                                                   |
|-------------|------|-------|-------|------------|-------------|-------------|----|----------|----------|---------------------------------------------------------------------------------------------------|
| CCG003364.1 | 2292 | 0     | 29097 | 0.001      | 443.7962388 | 18.75953791 | Up | 4.44E-16 | 1.66E-15 | AAEL004401-PA (Fragment)<br>OS=Aedes aegypti GN=HPX7<br>PE=4 SV=2                                 |
| CCG002555.1 | 4217 | 3819  | 29479 | 38.9142557 | 244.3763436 | 2.650733964 | Up | 6.38E-12 | 1.44E-11 | AAEL007880-PA OS=Aedes<br>aegypti GN=AAEL007880 PE=3<br>SV=1                                      |
| CCG006336.1 | 1002 | 7714  | 30004 | 330.806919 | 1046.794547 | 1.661917    | Up | 2.48E-11 | 5.41E-11 | AAEL007699-PA OS=Aedes<br>aegypti GN=AAEL007699 PE=2<br>SV=1                                      |
| CCG016778.1 | 1470 | 4844  | 30352 | 141.595506 | 721.8051814 | 2.349834018 | Up | 1.38E-11 | 3.05E-11 | AAEL009994-PA OS=Aedes<br>aegypti GN=AAEL009994 PE=2<br>SV=1                                      |
| CCG002408.1 | 1447 | 7797  | 30417 | 231.537678 | 734.8485864 | 1.666200033 | Up | 0        | 0        | Ribosomal protein S5 OS=Aedes<br>albopictus PE=2 SV=1                                             |
| CCG015165.1 | 6081 | 9995  | 30436 | 70.6269524 | 174.9695958 | 1.308813499 | Up | 2.77E-11 | 6.04E-11 | AAEL004716-PA OS=Aedes<br>aegypti GN=AAEL004716 PE=4<br>SV=1                                      |
| CCG026845.1 | 7798 | 10253 | 30633 | 56.4976518 | 137.3271214 | 1.281353766 | Up | 0        | 0        | AAEL005515-PA OS=Aedes<br>aegypti GN=AAEL005515 PE=4<br>SV=1                                      |
| CCG008943.1 | 2830 | 5878  | 31114 | 89.2495053 | 384.3434005 | 2.106479819 | Up | 2.52E-11 | 5.51E-11 | Putative uncharacterized protein<br>OS=Culex quinquefasciatus<br>GN=CpipJ_CPIJ003009 PE=4<br>SV=1 |
| CCG002644.1 | 822  | 5581  | 31567 | 291.744634 | 1342.49139  | 2.202134812 | Up | 6.47E-12 | 1.46E-11 | Ribosomal protein S2 OS=Aedes<br>albopictus PE=2 SV=1                                             |
| CCG022918.1 | 5323 | 4178  | 31623 | 33.7267615 | 207.6809292 | 2.622403046 | Up | 1.05E-11 | 2.33E-11 | AAEL002551-PA OS=Aedes<br>aegypti GN=AAEL002551 PE=4<br>SV=1                                      |
| CCG004868.1 | 5466 | 0     | 32075 | 0.001      | 205.1384426 | 17.64623835 | Up | 4.44E-16 | 1.65E-15 | AAEL007657-PA OS=Aedes<br>aegypti GN=AAEL007657 PE=4<br>SV=1                                      |
| CCG011071.1 | 5103 | 3999  | 32157 | 33.6735192 | 220.292633  | 2.709734838 | Up | 5.80E-12 | 1.31E-11 | AAEL001898-PA OS=Aedes<br>aegypti GN=AAEL001898 PE=4<br>SV=1                                      |
| CCG014955.1 | 2342 | 6158  | 32532 | 112.983615 | 485.5946456 | 2.10363895  | Up | 0        | 0        | Nucleolar GTP-binding protein 1<br>OS=Aedes aegypti<br>GN=AAEL009859 PE=3 SV=1                    |
| CCG005172.1 | 3803 | 10575 | 33093 | 119.485917 | 304.2004347 | 1.348181624 | Up | 0        | 0        | Heat shock cognate 70 OS=Aedes<br>aegypti PE=2 SV=1                                               |
| CCG000428.4 | 3609 | 11865 | 33513 | 141.267914 | 324.6208727 | 1.200321942 | Up | 0        | 0        | AAEL000804-PA OS=Aedes<br>aegypti GN=AAEL000804 PE=4<br>SV=1                                      |
| CCG008274.1 | 2592 | 142   | 33738 | 2.35405182 | 455.0240516 | 7.594652917 | Up | 2.62E-13 | 7.34E-13 | AAEL002422-PA OS=Aedes<br>aegypti GN=AAEL002422 PE=4<br>SV=1                                      |

|             |       |       |       |            |             |             |    |          |          |                                                                                          |
|-------------|-------|-------|-------|------------|-------------|-------------|----|----------|----------|------------------------------------------------------------------------------------------|
| CCG028312.1 | 4062  | 9772  | 34847 | 103.372784 | 299.8993281 | 1.536621894 | Up | 2.40E-11 | 5.23E-11 | AAEL011104-PA OS=Aedes aegypti GN=AAEL011104 PE=4 SV=1                                   |
| CCG007988.1 | 46271 | 7610  | 36202 | 7.06705454 | 27.35103057 | 1.952414247 | Up | 0        | 0        | AAEL006959-PA OS=Aedes aegypti GN=AAEL006959 PE=4 SV=1                                   |
| CCG003152.1 | 2105  | 8872  | 37379 | 181.105694 | 620.7626734 | 1.777209906 | Up | 0        | 0        | Heat shock cognate 70 OS=Aedes aegypti PE=2 SV=1                                         |
| CCG012273.2 | 3687  | 141   | 38538 | 1.64326894 | 365.3979035 | 7.796755933 | Up | 0        | 0        | AAEL004388-PA (Fragment) OS=Aedes aegypti GN=HPX8A PE=4 SV=2                             |
| CCG008581.1 | 638   | 13230 | 38916 | 891.049512 | 2132.345296 | 1.258863572 | Up | 0        | 0        | AAEL007699-PA OS=Aedes aegypti GN=AAEL007699 PE=2 SV=1                                   |
| CCG007256.1 | 1305  | 7976  | 39400 | 262.62575  | 1055.445291 | 2.006771519 | Up | 0        | 0        | Ribosomal protein L3 OS=Aedes aegypti PE=2 SV=1                                          |
| CCG007978.1 | 2841  | 783   | 42786 | 11.8427674 | 526.4782928 | 5.474295896 | Up | 0        | 0        | AAEL004978-PA OS=Aedes aegypti GN=AAEL004978 PE=2 SV=1                                   |
| CCG021835.1 | 6417  | 16676 | 43134 | 111.666401 | 234.9836856 | 1.073365436 | Up | 0        | 0        | AAEL017349-PA OS=Aedes aegypti PE=2 SV=1                                                 |
| CCG007823.1 | 429   | 63    | 44252 | 6.31024075 | 3605.999216 | 9.15848832  | Up | 0        | 0        | Chymotrypsin-like serine protease OS=Aedes aegypti GN=JA15 PE=2 SV=1                     |
| CCG019426.1 | 405   | 12826 | 44651 | 1360.81436 | 3854.128435 | 1.501934378 | Up | 0        | 0        | OS=ribosomal protein L32 OS=Culex quinquefasciatus GN=CpipJ_CPIJ001220 PE=4 SV=1         |
| CCG002645.1 | 6483  | 8832  | 45858 | 58.5390554 | 247.2800642 | 2.078674563 | Up | 0        | 0        | AAEL010159-PA OS=Aedes aegypti GN=AAEL010159 PE=4 SV=1                                   |
| CCG010291.1 | 1320  | 3185  | 46519 | 103.680761 | 1231.987937 | 3.57076801  | Up | 0        | 0        | AAEL008500-PA OS=Aedes aegypti GN=AAEL008500 PE=3 SV=1                                   |
| CCG026423.1 | 9565  | 2329  | 48385 | 10.4627822 | 176.8380786 | 4.079090521 | Up | 0        | 0        | Putative uncharacterized protein OS=Culex quinquefasciatus GN=CpipJ_CPIJ009795 PE=4 SV=1 |
| CCG015184.1 | 1699  | 33    | 48546 | 0.83460932 | 998.8725746 | 10.22498389 | Up | 1.31E-13 | 4.01E-13 | AAEL000442-PA OS=Aedes aegypti GN=AAEL000442 PE=4 SV=1                                   |
| CCG012092.1 | 1809  | 249   | 50992 | 5.91457375 | 985.4021278 | 7.380294576 | Up | 0        | 0        | AAEL010097-PA OS=Aedes aegypti GN=AAEL010097 PE=4 SV=1                                   |

|             |       |        |        |            |             |              |      |          |          |                                                                                            |
|-------------|-------|--------|--------|------------|-------------|--------------|------|----------|----------|--------------------------------------------------------------------------------------------|
| CCG001066.1 | 2088  | 320333 | 52037  | 6592.25287 | 871.2278967 | -2.919649529 | Down | 0        | 0        | ATP synthase subunit alpha<br>OS=Aedes aegypti<br>GN=AAEL012175 PE=2 SV=1                  |
| CCG026558.1 | 8283  | 401328 | 55728  | 2081.97002 | 235.1991848 | -3.145994327 | Down | 0        | 0        | AAEL005733-PA OS=Aedes<br>aegypti GN=AAEL005733 PE=4<br>SV=1                               |
| CCG027751.1 | 1795  | 16975  | 56883  | 406.35724  | 1107.817079 | 1.446899184  | Up   | 0        | 0        | Elongation factor 1-gamma<br>OS=Aedes aegypti PE=2 SV=1                                    |
| CCG014051.1 | 661   | 17515  | 58235  | 1138.60046 | 3079.871782 | 1.435608708  | Up   | 0        | 0        | 60S ribosomal protein L17<br>OS=Culex quinquefasciatus<br>GN=CpipJ_CPIJ015624 PE=3<br>SV=1 |
| CCG024781.1 | 985   | 25766  | 73431  | 1124.01846 | 2606.112915 | 1.213233865  | Up   | 1.43E-10 | 3.04E-10 | 60S ribosomal protein L31<br>OS=Culex quinquefasciatus<br>GN=CpipJ_CPIJ010692 PE=3<br>SV=1 |
| CCG011426.1 | 813   | 155    | 74433  | 8.19226183 | 3200.552786 | 8.609843563  | Up   | 3.42E-13 | 9.26E-13 | AAEL003060-PA (Precursor)<br>OS=Aedes aegypti GN=CHYM<br>PE=2 SV=1                         |
| CCG016979.2 | 2286  | 24382  | 76430  | 458.306242 | 1168.793129 | 1.350635762  | Up   | 4.23E-11 | 9.13E-11 | AAEL010787-PA OS=Aedes<br>aegypti GN=AAEL010787 PE=3<br>SV=1                               |
| CCG003471.1 | 1389  | 31475  | 78256  | 973.70223  | 1969.54277  | 1.016308196  | Up   | 1.70E-10 | 3.62E-10 | AAEL008188-PA OS=Aedes<br>aegypti GN=AAEL008188 PE=4<br>SV=1                               |
| CCG015935.1 | 813   | 20     | 89892  | 1.05706604 | 3865.276034 | 11.83629022  | Up   | 3.69E-10 | 7.70E-10 | AAEL003060-PA (Precursor)<br>OS=Aedes aegypti GN=CHYM<br>PE=2 SV=1                         |
| CCG016661.1 | 51084 | 238399 | 91016  | 200.531316 | 62.28491345 | -1.686872892 | Down | 0        | 0        | AAEL006582-PA OS=Aedes<br>aegypti GN=AAEL006582 PE=3<br>SV=1                               |
| CCG012274.1 | 2355  | 21     | 91549  | 0.38316961 | 1358.978888 | 11.79225229  | Up   | 1.76E-10 | 3.73E-10 | AAEL004388-PA (Fragment)<br>OS=Aedes aegypti GN=HPX8A<br>PE=4 SV=2                         |
| CCG014531.2 | 948   | 26855  | 102590 | 1217.24918 | 3783.09031  | 1.635940688  | Up   | 1.61E-10 | 3.43E-10 | AAEL010821-PA OS=Aedes<br>aegypti GN=AAEL010821 PE=2<br>SV=1                               |
| CCG014436.2 | 2494  | 36874  | 133320 | 635.311144 | 1868.73996  | 1.556530596  | Up   | 2.25E-10 | 4.75E-10 | AGAP006023-PA OS=Anopheles<br>gambiae GN=AGAP006023 PE=4<br>SV=3                           |
| CCG017696.1 | 1459  | 31481  | 138098 | 927.162588 | 3308.888352 | 1.835452356  | Up   | 2.02E-10 | 4.26E-10 | AAEL006259-PA OS=Aedes<br>aegypti GN=GPROP2 PE=3 SV=1                                      |



|             |     |    |        |            |             |             |    |          |          |                                                  |
|-------------|-----|----|--------|------------|-------------|-------------|----|----------|----------|--------------------------------------------------|
| CCG003493.1 | 696 | 51 | 144493 | 3.14864435 | 7257.509031 | 11.17052794 | Up | 0        | 0        | Trypsin OS=Ochlerotatus taeniorhynchus PE=2 SV=2 |
| CCG025915.1 | 759 | 40 | 210225 | 2.26454464 | 9682.613616 | 12.06195983 | Up | 6.86E-14 | 2.24E-13 | Trypsin OS=Ochlerotatus taeniorhynchus PE=2 SV=2 |
