# Supplementary material
Source: PubMed Central journal article supplement (PMC4640774)
Supplement: pnas.1516410112.sd25.pdf [file pnas.1516410112.sd25.pdf]

**Table S7.2. Candidate male-specific gene expression.**

| GeneID      | Gene_length | Male reads | Female reads | Male-RPKM  | Female-RPKM | log2 Ratio(F/M) | Up-Down-Regulation(F/M) | P-value   | FDR       | Description                                                                              |
|-------------|-------------|------------|--------------|------------|-------------|-----------------|-------------------------|-----------|-----------|------------------------------------------------------------------------------------------|
| CCG024282.1 | 636         | 5918       | 0            | 399.834732 | 0.001       | -18.60904427    | Down                    | 0         | 0         | -                                                                                        |
| CCG011370.1 | 234         | 1203       | 0            | 220.908507 | 0.001       | -17.75308945    | Down                    | 0         | 0         | AAEL006011-PA OS=Aedes aegypti GN=AAEL006011 PE=4 SV=1                                   |
| CCG020274.1 | 381         | 1719       | 0            | 193.871322 | 0.001       | -17.56473989    | Down                    | 0         | 0         | Cuticle protein OS=Culex quinquefasciatus GN=CpipJ_CPIJ003476 PE=4 SV=1                  |
| CCG027515.1 | 171         | 677        | 0            | 170.119944 | 0.001       | -17.37619276    | Down                    | 1.82E-236 | 1.11E-235 | AAEL005219-PA OS=Aedes aegypti GN=AAEL005219 PE=4 SV=1                                   |
| CCG016570.1 | 636         | 2398       | 0            | 162.014817 | 0.001       | -17.30576623    | Down                    | 0         | 0         | AAEL010164-PA OS=Aedes aegypti GN=AAEL010164 PE=4 SV=1                                   |
| CCG017832.1 | 564         | 1917       | 0            | 146.051385 | 0.001       | -17.15611652    | Down                    | 0         | 0         | Putative uncharacterized protein OS=Culex quinquefasciatus GN=CpipJ_CPIJ010091 PE=4 SV=1 |
| CCG016951.1 | 423         | 1422       | 0            | 144.451448 | 0.001       | -17.14022514    | Down                    | 0         | 0         | -                                                                                        |
| CCG026789.1 | 1485        | 4650       | 0            | 134.551694 | 0.001       | -17.03780103    | Down                    | 0         | 0         | -                                                                                        |
| CCG008430.1 | 684         | 2013       | 0            | 126.459175 | 0.001       | -16.94831219    | Down                    | 0         | 0         | AAEL008779-PA OS=Aedes aegypti GN=AAEL008779 PE=4 SV=1                                   |
| CCG024283.1 | 402         | 1061       | 0            | 113.41017  | 0.001       | -16.7911905     | Down                    | 0         | 0         | AAEL003311-PA OS=Aedes aegypti GN=AAEL003311 PE=4 SV=1                                   |
| CCG001151.1 | 510         | 1296       | 0            | 109.193679 | 0.001       | -16.73652981    | Down                    | 0         | 0         | -                                                                                        |
| CCG014935.1 | 1245        | 2947       | 0            | 101.712296 | 0.001       | -16.63413456    | Down                    | 0         | 0         | AAEL002000-PA OS=Aedes aegypti GN=AAEL002000 PE=3 SV=1                                   |
| CCG026683.1 | 1407        | 3202       | 0            | 97.7889767 | 0.001       | -16.57738423    | Down                    | 0         | 0         | AAEL003308-PA (Fragment) OS=Aedes aegypti GN=AAEL003308 PE=3 SV=1                        |
| CCG020272.1 | 357         | 602        | 0            | 72.4587682 | 0.001       | -16.14487266    | Down                    | 2.35E-210 | 1.41E-209 | Cuticle protein OS=Culex quinquefasciatus GN=CpipJ_CPIJ003474 PE=4 SV=1                  |
| CCG010349.1 | 306         | 509        | 0            | 71.4758004 | 0.001       | -16.12516725    | Down                    | 5.60E-178 | 3.27E-177 | AAEL003177-PA OS=Aedes aegypti GN=AAEL003177 PE=4 SV=1                                   |
| CCG020534.1 | 489         | 753        | 0            | 66.1681189 | 0.001       | -16.01384865    | Down                    | 6.32E-263 | 3.92E-262 | AAEL003027-PA OS=Aedes aegypti GN=AAEL003027 PE=4 SV=1                                   |
| CCG028082.1 | 384         | 590        | 0            | 66.0212068 | 0.001       | -16.01064189    | Down                    | 3.53E-206 | 2.12E-205 | -                                                                                        |

|             |      |      |   |            |       |              |      |           |           |                                                                                                  |
|-------------|------|------|---|------------|-------|--------------|------|-----------|-----------|--------------------------------------------------------------------------------------------------|
| CCG002949.1 | 1251 | 1624 | 0 | 55.7816539 | 0.001 | -15.76750309 | Down | 0         | 0         | AAEL007281-PA OS=Aedes aegypti GN=AAEL007281 PE=4 SV=1                                           |
| CCG013236.1 | 741  | 911  | 0 | 52.8278384 | 0.001 | -15.68901076 | Down | 0         | 0         | Serine protease inhibitor dipetalogastin OS=Culex quinquefasciatus GN=CpipJ_CPIJ010521 PE=4 SV=1 |
| CCG017455.1 | 519  | 616  | 0 | 51.0006869 | 0.001 | -15.63822906 | Down | 3.14E-215 | 1.89E-214 | AAEL010161-PA OS=Aedes aegypti GN=AAEL010161 PE=4 SV=1                                           |
| CCG014380.1 | 1623 | 1833 | 0 | 48.5295894 | 0.001 | -15.56657703 | Down | 0         | 0         | Cytosol aminopeptidase OS=Culex quinquefasciatus GN=CpipJ_CPIJ000990 PE=4 SV=1                   |
| CCG000433.1 | 822  | 918  | 0 | 47.9880978 | 0.001 | -15.55038901 | Down | 0         | 0         | AAEL013951-PA OS=Aedes aegypti GN=AAEL013951 PE=3 SV=1                                           |
| CCG010213.1 | 606  | 631  | 0 | 44.7424134 | 0.001 | -15.44935546 | Down | 1.88E-220 | 1.14E-219 | -                                                                                                |
| CCG019693.1 | 846  | 828  | 0 | 42.0554849 | 0.001 | -15.36000635 | Down | 4.90E-289 | 3.07E-288 | AAEL010684-PA OS=Aedes aegypti GN=AAEL010684 PE=4 SV=1                                           |
| CCG017614.1 | 345  | 329  | 0 | 40.9769353 | 0.001 | -15.32252447 | Down | 2.59E-115 | 1.40E-114 | AAEL013751-PA OS=Aedes aegypti GN=AAEL013751 PE=4 SV=1                                           |
| CCG021991.1 | 273  | 242  | 0 | 38.0903875 | 0.001 | -15.21713934 | Down | 5.04E-85  | 2.58E-84  | -                                                                                                |
| CCG027990.1 | 759  | 616  | 0 | 34.8739875 | 0.001 | -15.08986371 | Down | 3.14E-215 | 1.89E-214 | AAEL006403-PA OS=Aedes aegypti GN=AAEL006403 PE=3 SV=1                                           |
| CCG005290.1 | 357  | 288  | 0 | 34.6646599 | 0.001 | -15.08117798 | Down | 4.87E-101 | 2.58E-100 | Cuticle protein OS=Culex quinquefasciatus GN=CpipJ_CPIJ003474 PE=4 SV=1                          |
| CCG023069.1 | 336  | 257  | 0 | 32.8667315 | 0.001 | -15.00434037 | Down | 3.02E-90  | 1.57E-89  | Predicted protein OS=Culex quinquefasciatus GN=CpipJ_CPIJ010777 PE=4 SV=1                        |
| CCG011556.1 | 591  | 445  | 0 | 32.3545379 | 0.001 | -14.98168045 | Down | 1.07E-155 | 6.11E-155 | AGAP006829-PA OS=Anopheles gambiae GN=CPR59 PE=4 SV=4                                            |
| CCG016441.1 | 441  | 323  | 0 | 31.4721639 | 0.001 | -14.94178876 | Down | 3.18E-113 | 1.72E-112 | -                                                                                                |
| CCG013078.1 | 333  | 227  | 0 | 29.291681  | 0.001 | -14.83820337 | Down | 8.40E-80  | 4.26E-79  | -                                                                                                |
| CCG008372.1 | 1002 | 644  | 0 | 27.6172745 | 0.001 | -14.75328333 | Down | 5.60E-225 | 3.40E-224 | AAEL005010-PA OS=Aedes aegypti GN=AAEL005010 PE=4 SV=1                                           |
| CCG021899.1 | 1269 | 759  | 0 | 25.7005741 | 0.001 | -14.64951297 | Down | 5.15E-265 | 3.20E-264 | AAEL010882-PA OS=Aedes aegypti GN=AAEL010882 PE=4 SV=1                                           |
| CCG019784.1 | 918  | 518  | 0 | 24.2465387 | 0.001 | -14.56549119 | Down | 4.12E-181 | 2.41E-180 | -                                                                                                |
| CCG026431.1 | 774  | 416  | 0 | 23.0948444 | 0.001 | -14.49528321 | Down | 1.33E-145 | 7.54E-145 | Superoxide dismutase OS=Aedes aegypti GN=MNSOD2 PE=3 SV=1                                        |
| CCG000615.1 | 741  | 385  | 0 | 22.3257056 | 0.001 | -14.44641815 | Down | 8.27E-135 | 4.62E-134 | Serine protease inhibitor dipetalogastin OS=Culex quinquefasciatus GN=CpipJ_CPIJ010521 PE=4 SV=1 |

|             |      |     |   |            |       |              |      |           |           |                                                                                          |
|-------------|------|-----|---|------------|-------|--------------|------|-----------|-----------|------------------------------------------------------------------------------------------|
| CCG022597.1 | 477  | 240 | 0 | 21.6199923 | 0.001 | -14.40007839 | Down | 2.50E-84  | 1.28E-83  | AAEL001115-PA OS=Aedes aegypti GN=AAEL001115 PE=4 SV=1                                   |
| CCG017948.1 | 516  | 259 | 0 | 21.568142  | 0.001 | -14.39661428 | Down | 6.08E-91  | 3.16E-90  | -                                                                                        |
| CCG025202.1 | 717  | 347 | 0 | 20.7956735 | 0.001 | -14.34399579 | Down | 1.40E-121 | 7.69E-121 | Uncharacterized protein OS=Anopheles darlingi GN=AND_02268 PE=4 SV=1                     |
| CCG006934.1 | 669  | 318 | 0 | 20.4250756 | 0.001 | -14.3180538  | Down | 1.75E-111 | 9.43E-111 | AAEL011558-PA OS=Aedes aegypti GN=AAEL011558 PE=3 SV=1                                   |
| CCG017154.1 | 360  | 170 | 0 | 20.2912636 | 0.001 | -14.30857109 | Down | 5.87E-60  | 2.83E-59  | AAEL012715-PA OS=Aedes aegypti GN=AAEL012715 PE=4 SV=1                                   |
| CCG016799.1 | 702  | 330 | 0 | 20.1994479 | 0.001 | -14.30202824 | Down | 1.16E-115 | 6.31E-115 | AAEL005352-PA OS=Aedes aegypti GN=AAEL005352 PE=4 SV=1                                   |
| CCG020012.1 | 384  | 178 | 0 | 19.9182624 | 0.001 | -14.28180418 | Down | 9.62E-63  | 4.68E-62  | -                                                                                        |
| CCG016572.1 | 615  | 282 | 0 | 19.7031954 | 0.001 | -14.266142   | Down | 5.98E-99  | 3.16E-98  | AAEL010160-PA OS=Aedes aegypti GN=AAEL010160 PE=4 SV=1                                   |
| CCG023341.1 | 369  | 167 | 0 | 19.4470073 | 0.001 | -14.24726053 | Down | 6.50E-59  | 3.12E-58  | AAEL003177-PA OS=Aedes aegypti GN=AAEL003177 PE=4 SV=1                                   |
| CCG027992.1 | 855  | 372 | 0 | 18.6956038 | 0.001 | -14.19041145 | Down | 2.78E-130 | 1.54E-129 | AAEL006418-PA OS=Aedes aegypti GN=AAEL006418 PE=3 SV=1                                   |
| CCG017204.1 | 600  | 261 | 0 | 18.6918346 | 0.001 | -14.19012055 | Down | 1.22E-91  | 6.38E-91  | AAEL009046-PA OS=Aedes aegypti GN=AAEL009046 PE=4 SV=1                                   |
| CCG026261.2 | 1881 | 802 | 0 | 18.3209607 | 0.001 | -14.16120754 | Down | 5.52E-280 | 3.44E-279 | AAEL015536-PA OS=Aedes aegypti GN=AAEL015536 PE=4 SV=1                                   |
| CCG008102.1 | 594  | 250 | 0 | 18.0849051 | 0.001 | -14.14249841 | Down | 8.26E-88  | 4.27E-87  | -                                                                                        |
| CCG011247.1 | 819  | 344 | 0 | 18.0483379 | 0.001 | -14.13957836 | Down | 1.55E-120 | 8.51E-120 | -                                                                                        |
| CCG014875.1 | 600  | 243 | 0 | 17.4027425 | 0.001 | -14.08702706 | Down | 2.26E-85  | 1.16E-84  | AAEL009046-PA OS=Aedes aegypti GN=AAEL009046 PE=4 SV=1                                   |
| CCG019078.1 | 1584 | 634 | 0 | 17.1987448 | 0.001 | -14.07001566 | Down | 1.70E-221 | 1.03E-220 | Glutamate dehydrogenase OS=Aedes aegypti GN=AAEL003757 PE=3 SV=1                         |
| CCG026409.1 | 924  | 368 | 0 | 17.1134874 | 0.001 | -14.06284616 | Down | 6.86E-129 | 3.80E-128 | Putative uncharacterized protein OS=Culex quinquefasciatus GN=CpipJ_CPIJ013371 PE=4 SV=1 |
| CCG005751.1 | 720  | 279 | 0 | 16.6507722 | 0.001 | -14.02330146 | Down | 6.62E-98  | 3.49E-97  | AAEL009697-PA OS=Aedes aegypti GN=AAEL009697 PE=4 SV=1                                   |
| CCG019017.1 | 513  | 196 | 0 | 16.4172865 | 0.001 | -14.00292807 | Down | 5.21E-69  | 2.57E-68  | -                                                                                        |
| CCG027480.1 | 696  | 264 | 0 | 16.2988649 | 0.001 | -13.99248387 | Down | 1.10E-92  | 5.77E-92  | Uncharacterized protein OS=Anopheles darlingi GN=AND_17586 PE=4 SV=1                     |

|             |      |     |   |            |       |              |      |           |           |                                                                                                            |
|-------------|------|-----|---|------------|-------|--------------|------|-----------|-----------|------------------------------------------------------------------------------------------------------------|
| CCG012966.1 | 1131 | 420 | 0 | 15.9569306 | 0.001 | -13.96189555 | Down | 5.40E-147 | 3.06E-146 | AAEL009451-PA OS=Aedes aegypti GN=AAEL009451 PE=3 SV=1                                                     |
| CCG000293.1 | 795  | 287 | 0 | 15.5123444 | 0.001 | -13.92112912 | Down | 1.09E-100 | 5.76E-100 | -                                                                                                          |
| CCG017459.1 | 615  | 212 | 0 | 14.8123313 | 0.001 | -13.8545111  | Down | 1.40E-74  | 7.02E-74  | AAEL010160-PA OS=Aedes aegypti GN=AAEL010160 PE=4 SV=1                                                     |
| CCG007146.1 | 1488 | 497 | 0 | 14.3521224 | 0.001 | -13.80897648 | Down | 8.42E-174 | 4.90E-173 | AAEL006017-PA OS=Aedes aegypti GN=AAEL006017 PE=4 SV=1                                                     |
| CCG006467.1 | 702  | 206 | 0 | 12.6093523 | 0.001 | -13.62220655 | Down | 1.72E-72  | 8.57E-72  | AAEL005352-PA OS=Aedes aegypti GN=AAEL005352 PE=4 SV=1                                                     |
| CCG005118.1 | 945  | 269 | 0 | 12.2315964 | 0.001 | -13.57832509 | Down | 2.01E-94  | 1.05E-93  | AAEL003027-PA OS=Aedes aegypti GN=AAEL003027 PE=4 SV=1                                                     |
| CCG006177.1 | 594  | 167 | 0 | 12.0807166 | 0.001 | -13.56041842 | Down | 6.50E-59  | 3.12E-58  | -                                                                                                          |
| CCG001024.1 | 699  | 195 | 0 | 11.987265  | 0.001 | -13.54921491 | Down | 1.16E-68  | 5.73E-68  | AAEL001452-PA OS=Aedes aegypti GN=AAEL001452 PE=4 SV=1                                                     |
| CCG021524.1 | 477  | 133 | 0 | 11.981079  | 0.001 | -13.54847023 | Down | 4.46E-47  | 2.06E-46  | -                                                                                                          |
| CCG014856.1 | 873  | 239 | 0 | 11.7637647 | 0.001 | -13.52206221 | Down | 5.58E-84  | 2.86E-83  | Putative uncharacterized protein OS=Culex quinquefasciatus GN=CpipJ_CPIJ011620 PE=4 SV=1                   |
| CCG001562.1 | 588  | 160 | 0 | 11.6924448 | 0.001 | -13.513289   | Down | 1.78E-56  | 8.48E-56  | -                                                                                                          |
| CCG017925.1 | 1095 | 290 | 0 | 11.3801124 | 0.001 | -13.47422718 | Down | 9.80E-102 | 5.20E-101 | -                                                                                                          |
| CCG027361.1 | 489  | 129 | 0 | 11.3355742 | 0.001 | -13.46856985 | Down | 1.10E-45  | 5.05E-45  | Putative uncharacterized protein OS=Tribolium castaneum GN=TcasGA2_TC005836 PE=4 SV=1                      |
| CCG002914.1 | 2838 | 721 | 0 | 10.9165534 | 0.001 | -13.41422982 | Down | 8.74E-252 | 5.38E-251 | Putative uncharacterized protein OS=Candida tropicalis (strain ATCC MYA-3404 / T1) GN=CTRG_04951 PE=4 SV=1 |
| CCG028482.1 | 1056 | 252 | 0 | 10.2541412 | 0.001 | -13.32391905 | Down | 1.66E-88  | 8.61E-88  | AAEL010114-PA OS=Aedes aegypti GN=AAEL010114 PE=4 SV=1                                                     |
| CCG000021.1 | 801  | 191 | 0 | 10.2462164 | 0.001 | -13.32280364 | Down | 2.87E-67  | 1.41E-66  | -                                                                                                          |
| CCG013637.1 | 1293 | 304 | 0 | 10.1027064 | 0.001 | -13.3024542  | Down | 1.31E-106 | 7.00E-106 | AAEL004939-PA OS=Aedes aegypti GN=AAEL004939 PE=3 SV=1                                                     |
| CCG027815.1 | 246  | 56  | 0 | 9.7817282  | 0.001 | -13.25587366 | Down | 2.86E-20  | 1.12E-19  | Putative uncharacterized protein OS=Culex quinquefasciatus GN=CpipJ_CPIJ011592 PE=4 SV=1                   |
| CCG005701.1 | 642  | 145 | 0 | 9.70500237 | 0.001 | -13.24451285 | Down | 2.97E-51  | 1.39E-50  | AAEL002052-PA OS=Aedes aegypti GN=AAEL002052 PE=4 SV=1                                                     |
| CCG023349.1 | 657  | 143 | 0 | 9.35262108 | 0.001 | -13.19115502 | Down | 1.47E-50  | 6.89E-50  | AAEL013073-PA OS=Aedes aegypti GN=AAEL013073 PE=3 SV=1                                                     |

|             |      |      |   |            |             |              |      |           |           |                                                                   |
|-------------|------|------|---|------------|-------------|--------------|------|-----------|-----------|-------------------------------------------------------------------|
| CCG020425.1 | 375  | 78   | 0 | 8.9377048  | 0.001       | -13.12568868 | Down | 6.28E-28  | 2.61E-27  | -                                                                 |
| CCG018151.1 | 561  | 116  | 0 | 8.88500751 | 0.001       | -13.11715728 | Down | 3.70E-41  | 1.66E-40  | AAEL003576-PA OS=Aedes aegypti GN=AAEL003576 PE=4 SV=1            |
| CCG020854.1 | 720  | 148  | 0 | 8.83266767 | 0.001       | -13.10863352 | Down | 2.68E-52  | 1.26E-51  | -                                                                 |
| CCG006118.1 | 1608 | 7043 | 1 | 188.206369 | 0.021740222 | -13.07966116 | Down | 0         | 0         | AAEL006975-PA (Fragment) OS=Aedes aegypti GN=AAEL006975 PE=4 SV=1 |
| CCG019111.1 | 1839 | 367  | 0 | 8.57525427 | 0.001       | -13.06596373 | Down | 1.53E-128 | 8.47E-128 | Malic enzyme OS=Aedes aegypti GN=AAEL001073 PE=3 SV=1             |
| CCG018730.1 | 1572 | 312  | 0 | 8.52834427 | 0.001       | -13.05804996 | Down | 2.15E-109 | 1.15E-108 | AAEL014288-PA OS=Aedes aegypti GN=AAEL014288 PE=4 SV=1            |
| CCG022406.1 | 402  | 79   | 0 | 8.44430108 | 0.001       | -13.0437623  | Down | 2.82E-28  | 1.17E-27  | -                                                                 |
| CCG001041.1 | 696  | 134  | 0 | 8.27290868 | 0.001       | -13.01417894 | Down | 2.00E-47  | 9.24E-47  | -                                                                 |
| CCG022783.1 | 1959 | 369  | 0 | 8.09383975 | 0.001       | -12.98260857 | Down | 3.08E-129 | 1.71E-128 | AAEL011020-PA OS=Aedes aegypti GN=AAEL011020 PE=4 SV=1            |
| CCG023820.1 | 627  | 114  | 0 | 7.81267902 | 0.001       | -12.93160163 | Down | 1.84E-40  | 8.22E-40  | AAEL014067-PA OS=Aedes aegypti GN=AAEL014067 PE=4 SV=1            |
| CCG027395.1 | 327  | 59   | 0 | 7.75294906 | 0.001       | -12.92052947 | Down | 2.58E-21  | 1.02E-20  | AAEL008308-PA OS=Aedes aegypti GN=AAEL008308 PE=4 SV=1            |
| CCG001526.1 | 687  | 123  | 0 | 7.69327126 | 0.001       | -12.90938146 | Down | 1.35E-43  | 6.13E-43  | -                                                                 |
| CCG011043.1 | 285  | 51   | 0 | 7.68932093 | 0.001       | -12.90864048 | Down | 1.58E-18  | 6.06E-18  | AAEL002878-PA OS=Aedes aegypti GN=AAEL002878 PE=4 SV=1            |
| CCG016082.1 | 252  | 45   | 0 | 7.6731669  | 0.001       | -12.90560642 | Down | 1.93E-16  | 7.26E-16  | -                                                                 |
| CCG005487.1 | 1434 | 249  | 0 | 7.46127191 | 0.001       | -12.86520587 | Down | 1.84E-87  | 9.52E-87  | AAEL005004-PA OS=Aedes aegypti GN=AAEL005004 PE=4 SV=1            |
| CCG022757.1 | 1314 | 215  | 0 | 7.03081655 | 0.001       | -12.77947654 | Down | 1.26E-75  | 6.36E-75  | -                                                                 |
| CCG013013.1 | 1173 | 190  | 0 | 6.96014457 | 0.001       | -12.76490156 | Down | 6.39E-67  | 3.14E-66  | AAEL009564-PA OS=Aedes aegypti GN=AAEL009564 PE=4 SV=1            |
| CCG006739.1 | 561  | 90   | 0 | 6.89354031 | 0.001       | -12.75102938 | Down | 4.17E-32  | 1.78E-31  | AAEL003217-PA OS=Aedes aegypti GN=AAEL003217 PE=4 SV=1            |
| CCG003365.1 | 681  | 108  | 0 | 6.81458346 | 0.001       | -12.73440976 | Down | 2.26E-38  | 9.99E-38  | AAEL015481-PA OS=Aedes aegypti GN=AAEL015481 PE=4 SV=1            |
| CCG011522.1 | 486  | 74   | 0 | 6.54271679 | 0.001       | -12.67567411 | Down | 1.55E-26  | 6.38E-26  | -                                                                 |
| CCG002603.1 | 843  | 126  | 0 | 6.42252261 | 0.001       | -12.64892435 | Down | 1.22E-44  | 5.56E-44  | AAEL007706-PA OS=Aedes aegypti GN=AAEL007706 PE=4 SV=1            |

|             |      |     |   |            |       |              |      |           |           |                                                                                       |
|-------------|------|-----|---|------------|-------|--------------|------|-----------|-----------|---------------------------------------------------------------------------------------|
| CCG025163.3 | 363  | 54  | 0 | 6.39219193 | 0.001 | -12.64209501 | Down | 1.42E-19  | 5.53E-19  | NADH dehydrogenase [ubiquinone] 1 subunit C2 OS=Aedes aegypti GN=AAEL005946 PE=3 SV=1 |
| CCG023518.1 | 948  | 141 | 0 | 6.39106812 | 0.001 | -12.64184135 | Down | 7.32E-50  | 3.41E-49  | AAEL005907-PA OS=Aedes aegypti GN=AAEL005907 PE=4 SV=1                                |
| CCG017298.1 | 471  | 70  | 0 | 6.38616013 | 0.001 | -12.64073301 | Down | 3.83E-25  | 1.56E-24  | -                                                                                     |
| CCG023615.1 | 1503 | 223 | 0 | 6.37541638 | 0.001 | -12.63830385 | Down | 2.07E-78  | 1.05E-77  | AAEL000542-PA OS=Aedes aegypti GN=AAEL000542 PE=4 SV=1                                |
| CCG008090.1 | 711  | 103 | 0 | 6.22487013 | 0.001 | -12.60382802 | Down | 1.24E-36  | 5.44E-36  | AAEL009963-PA OS=Aedes aegypti GN=AAEL009963 PE=4 SV=1                                |
| CCG017732.1 | 606  | 87  | 0 | 6.1689223  | 0.001 | -12.59080276 | Down | 4.62E-31  | 1.96E-30  | AGAP004947-PA OS=Anopheles gambiae GN=AGAP004947 PE=4 SV=1                            |
| CCG021646.1 | 2442 | 346 | 0 | 6.08825888 | 0.001 | -12.57181399 | Down | 3.13E-121 | 1.71E-120 | AAEL005595-PA OS=Aedes aegypti GN=AAEL005595 PE=4 SV=1                                |
| CCG002701.1 | 930  | 128 | 0 | 5.91411401 | 0.001 | -12.52994634 | Down | 2.46E-45  | 1.12E-44  | AAEL000694-PA OS=Aedes aegypti GN=AAEL000694 PE=4 SV=1                                |
| CCG012993.1 | 432  | 58  | 0 | 5.76908474 | 0.001 | -12.49412674 | Down | 5.76E-21  | 2.27E-20  | Protein disulfide isomerase-like PDI-H OS=Physcomitrella patens PE=2 SV=1             |
| CCG006969.1 | 876  | 117 | 0 | 5.73910839 | 0.001 | -12.48661091 | Down | 1.66E-41  | 7.46E-41  | AAEL010658-PA OS=Aedes aegypti GN=AAEL010658 PE=4 SV=1                                |
| CCG012907.1 | 1113 | 148 | 0 | 5.7138551  | 0.001 | -12.48024873 | Down | 2.68E-52  | 1.26E-51  | AAEL002270-PA OS=Aedes aegypti GN=AAEL002270 PE=4 SV=1                                |
| CCG016598.1 | 294  | 39  | 0 | 5.70006684 | 0.001 | -12.47676312 | Down | 2.37E-14  | 8.28E-14  | AAEL007735-PA OS=Aedes aegypti GN=AAEL007735 PE=4 SV=1                                |
| CCG005716.1 | 432  | 57  | 0 | 5.66961776 | 0.001 | -12.46903576 | Down | 1.28E-20  | 5.04E-20  | AAEL004001-PA OS=Aedes aegypti GN=AAEL004001 PE=4 SV=1                                |
| CCG023186.1 | 651  | 84  | 0 | 5.54448189 | 0.001 | -12.43683694 | Down | 5.11E-30  | 2.15E-29  | -                                                                                     |
| CCG020025.1 | 219  | 28  | 0 | 5.49384735 | 0.001 | -12.42360111 | Down | 1.60E-10  | 3.41E-10  | Uncharacterized protein OS=Anopheles darlingi GN=AND_08788 PE=4 SV=1                  |
| CCG017202.1 | 420  | 53  | 0 | 5.42237127 | 0.001 | -12.40470818 | Down | 3.17E-19  | 1.23E-18  | AAEL012573-PA OS=Aedes aegypti GN=AAEL012573 PE=4 SV=1                                |
| CCG000244.1 | 1674 | 211 | 0 | 5.4161374  | 0.001 | -12.40304862 | Down | 3.12E-74  | 1.57E-73  | AAEL007188-PA (Fragment) OS=Aedes aegypti GN=AAEL007188 PE=4 SV=1                     |
| CCG001249.1 | 1248 | 151 | 0 | 5.19906244 | 0.001 | -12.34403577 | Down | 2.42E-53  | 1.14E-52  | AAEL006924-PA OS=Aedes aegypti GN=AAEL006924 PE=4 SV=1                                |

|             |      |     |   |            |       |              |      |          |          |                                                                                          |
|-------------|------|-----|---|------------|-------|--------------|------|----------|----------|------------------------------------------------------------------------------------------|
| CCG011441.1 | 1881 | 219 | 0 | 5.00285586 | 0.001 | -12.28853617 | Down | 5.12E-77 | 2.58E-76 | AAEL015536-PA OS=Aedes aegypti GN=AAEL015536 PE=4 SV=1                                   |
| CCG027782.1 | 1623 | 184 | 0 | 4.87149179 | 0.001 | -12.25014792 | Down | 7.84E-65 | 3.83E-64 | Predicted protein OS=Culex quinquefasciatus GN=CpipJ_CPIJ009617 PE=4 SV=1                |
| CCG003636.1 | 756  | 85  | 0 | 4.83125323 | 0.001 | -12.23818176 | Down | 2.29E-30 | 9.69E-30 | AAEL009485-PA OS=Aedes aegypti GN=AAEL009485 PE=4 SV=1                                   |
| CCG000755.1 | 642  | 72  | 0 | 4.81903566 | 0.001 | -12.23452876 | Down | 7.70E-26 | 3.15E-25 | AAEL013737-PA OS=Aedes aegypti GN=AAEL013737 PE=4 SV=1                                   |
| CCG027147.1 | 465  | 52  | 0 | 4.80521763 | 0.001 | -12.23038606 | Down | 7.07E-19 | 2.73E-18 | -                                                                                        |
| CCG004014.1 | 678  | 75  | 0 | 4.75328923 | 0.001 | -12.21471047 | Down | 6.95E-27 | 2.87E-26 | AAEL002657-PA OS=Aedes aegypti GN=AAEL002657 PE=4 SV=1                                   |
| CCG000700.1 | 609  | 67  | 0 | 4.72737639 | 0.001 | -12.20682402 | Down | 4.24E-24 | 1.71E-23 | Putative uncharacterized protein OS=Culex quinquefasciatus GN=CpipJ_CPIJ014666 PE=4 SV=1 |
| CCG026163.1 | 1458 | 160 | 0 | 4.71547156 | 0.001 | -12.20318634 | Down | 1.78E-56 | 8.48E-56 | Putative uncharacterized protein OS=Harpegnathos saltator GN=EAI_02652 PE=4 SV=1         |
| CCG026162.1 | 1239 | 132 | 0 | 4.5778894  | 0.001 | -12.16046689 | Down | 9.95E-47 | 4.58E-46 | Vitelline envelope protein alpha OS=Oncorhynchus mykiss PE=2 SV=1                        |
| CCG022067.1 | 1479 | 156 | 0 | 4.53230467 | 0.001 | -12.14602913 | Down | 4.39E-55 | 2.08E-54 | AAEL000542-PA OS=Aedes aegypti GN=AAEL000542 PE=4 SV=1                                   |
| CCG003754.1 | 540  | 56  | 0 | 4.45612063 | 0.001 | -12.12157257 | Down | 2.86E-20 | 1.12E-19 | AAEL014879-PA OS=Aedes aegypti GN=AAEL014879 PE=4 SV=1                                   |
| CCG001524.1 | 651  | 66  | 0 | 4.35637862 | 0.001 | -12.08891363 | Down | 9.45E-24 | 3.80E-23 | -                                                                                        |
| CCG024212.1 | 555  | 55  | 0 | 4.25826199 | 0.001 | -12.056049   | Down | 6.38E-20 | 2.49E-19 | AAEL007754-PA OS=Aedes aegypti GN=AAEL007754 PE=4 SV=1                                   |
| CCG004366.1 | 285  | 28  | 0 | 4.22158796 | 0.001 | -12.04357006 | Down | 1.60E-10 | 3.41E-10 | AAEL002878-PA OS=Aedes aegypti GN=AAEL002878 PE=4 SV=1                                   |
| CCG002783.1 | 1245 | 122 | 0 | 4.21068885 | 0.001 | -12.03984056 | Down | 3.02E-43 | 1.36E-42 | AAEL005714-PA (Fragment) OS=Aedes aegypti GN=AAEL005714 PE=4 SV=1                        |
| CCG014755.1 | 2616 | 248 | 0 | 4.0735834  | 0.001 | -11.99208273 | Down | 4.10E-87 | 2.12E-86 | Putative uncharacterized protein OS=Culex quinquefasciatus GN=CpipJ_CPIJ011070 PE=4 SV=1 |
| CCG025671.1 | 1509 | 139 | 0 | 3.95811339 | 0.001 | -11.95059723 | Down | 3.64E-49 | 1.69E-48 | AAEL007411-PA OS=Aedes aegypti GN=AAEL007411 PE=4 SV=1                                   |
| CCG017949.1 | 897  | 80  | 0 | 3.83230632 | 0.001 | -11.90399717 | Down | 1.26E-28 | 5.28E-28 | -                                                                                        |
| CCG017067.1 | 690  | 61  | 0 | 3.79877364 | 0.001 | -11.89131803 | Down | 5.20E-22 | 2.06E-21 | Putative uncharacterized protein OS=Culex quinquefasciatus GN=CpipJ_CPIJ015444 PE=4 SV=1 |

|             |      |      |   |            |            |              |      |          |          |                                                                                          |
|-------------|------|------|---|------------|------------|--------------|------|----------|----------|------------------------------------------------------------------------------------------|
| CCG002697.1 | 1395 | 121  | 0 | 3.72712393 | 0.001      | -11.86384708 | Down | 6.72E-43 | 3.03E-42 | AAEL005630-PA OS=Aedes aegypti GN=AAEL005630 PE=4 SV=1                                   |
| CCG007862.1 | 348  | 30   | 0 | 3.70428747 | 0.001      | -11.85498035 | Down | 3.23E-11 | 7.00E-11 | AAEL000929-PA OS=Aedes aegypti GN=AAEL000929 PE=3 SV=1                                   |
| CCG011880.1 | 477  | 41   | 0 | 3.69341534 | 0.001      | -11.85073979 | Down | 4.78E-15 | 1.72E-14 | -                                                                                        |
| CCG000986.1 | 564  | 5973 | 2 | 455.067775 | 0.12396552 | -11.8419268  | Down | 0        | 0        | Putative uncharacterized protein OS=Culex quinquefasciatus GN=CpipJ_CPIJ010091 PE=4 SV=1 |
| CCG021915.1 | 1647 | 139  | 0 | 3.62646819 | 0.001      | -11.82434948 | Down | 3.64E-49 | 1.69E-48 | AAEL002405-PA OS=Aedes aegypti GN=AAEL002405 PE=4 SV=1                                   |
| CCG010540.1 | 510  | 43   | 0 | 3.62293841 | 0.001      | -11.82294456 | Down | 9.61E-16 | 3.50E-15 | AGAP013237-PA OS=Anopheles gambiae GN=AgaP_AGAP013237 PE=4 SV=1                          |
| CCG022367.1 | 273  | 22   | 0 | 3.4627625  | 0.001      | -11.75770772 | Down | 1.97E-08 | 3.88E-08 | AAEL011229-PA OS=Aedes aegypti GN=AAEL011229 PE=4 SV=1                                   |
| CCG027834.1 | 363  | 29   | 0 | 3.43284381 | 0.001      | -11.7451885  | Down | 7.19E-11 | 1.54E-10 | AAEL017144-PA OS=Aedes aegypti PE=4 SV=1                                                 |
| CCG023461.1 | 1629 | 130  | 0 | 3.42913781 | 0.001      | -11.74363017 | Down | 4.95E-46 | 2.27E-45 | AAEL002674-PA OS=Aedes aegypti GN=AAEL002674 PE=4 SV=1                                   |
| CCG021138.1 | 1368 | 107  | 0 | 3.36093685 | 0.001      | -11.71464772 | Down | 5.03E-38 | 2.22E-37 | GD15416 OS=Drosophila simulans GN=GD15416 PE=3 SV=1                                      |
| CCG026915.1 | 1656 | 129  | 0 | 3.34728005 | 0.001      | -11.70877354 | Down | 1.10E-45 | 5.05E-45 | AAEL002674-PA OS=Aedes aegypti GN=AAEL002674 PE=4 SV=1                                   |
| CCG009550.1 | 843  | 65   | 0 | 3.31320611 | 0.001      | -11.69401224 | Down | 2.11E-23 | 8.46E-23 | AAEL007706-PA OS=Aedes aegypti GN=AAEL007706 PE=4 SV=1                                   |
| CCG004579.1 | 1638 | 122  | 0 | 3.200432   | 0.001      | -11.64405094 | Down | 3.02E-43 | 1.36E-42 | AAEL000108-PA OS=Aedes aegypti GN=AAEL000108 PE=4 SV=1                                   |
| CCG014194.1 | 1512 | 112  | 0 | 3.18294331 | 0.001      | -11.63614574 | Down | 9.14E-40 | 4.07E-39 | AAEL007411-PA OS=Aedes aegypti GN=AAEL007411 PE=4 SV=1                                   |
| CCG018644.1 | 708  | 51   | 0 | 3.09527749 | 0.001      | -11.59585304 | Down | 1.58E-18 | 6.06E-18 | AAEL013918-PA OS=Aedes aegypti GN=AAEL013918 PE=4 SV=1                                   |
| CCG006451.1 | 561  | 40   | 0 | 3.06379569 | 0.001      | -11.58110438 | Down | 1.06E-14 | 3.80E-14 | Predicted protein OS=Culex quinquefasciatus GN=CpipJ_CPIJ013022 PE=4 SV=1                |
| CCG002324.1 | 1251 | 87   | 0 | 2.98830289 | 0.001      | -11.54511067 | Down | 4.62E-31 | 1.96E-30 | AAEL006924-PA OS=Aedes aegypti GN=AAEL006924 PE=4 SV=1                                   |
| CCG021755.1 | 1215 | 74   | 0 | 2.61708672 | 0.001      | -11.35374601 | Down | 1.55E-26 | 6.38E-26 | AAEL002274-PA (Fragment) OS=Aedes aegypti GN=AAEL002274 PE=4 SV=1                        |

|             |      |      |   |            |             |              |      |          |          |                                                                                          |
|-------------|------|------|---|------------|-------------|--------------|------|----------|----------|------------------------------------------------------------------------------------------|
| CCG008141.1 | 2343 | 139  | 0 | 2.54920747 | 0.001       | -11.31583308 | Down | 3.64E-49 | 1.69E-48 | AAEL000382-PA OS=Aedes aegypti GN=AAEL000382 PE=4 SV=1                                   |
| CCG023064.1 | 354  | 21   | 0 | 2.54905205 | 0.001       | -11.31574512 | Down | 4.38E-08 | 8.54E-08 | Predicted protein OS=Culex quinquefasciatus GN=CpipJ_CPIJ015505 PE=4 SV=1                |
| CCG012275.1 | 468  | 27   | 0 | 2.47902315 | 0.001       | -11.27555603 | Down | 3.57E-10 | 7.49E-10 | AAEL005222-PA OS=Aedes aegypti GN=AAEL005222 PE=4 SV=1                                   |
| CCG014950.1 | 1719 | 99   | 0 | 2.47469676 | 0.001       | -11.27303604 | Down | 3.07E-35 | 1.33E-34 | AAEL009860-PA OS=Aedes aegypti GN=AAEL009860 PE=4 SV=1                                   |
| CCG010538.1 | 1290 | 74   | 0 | 2.46493051 | 0.001       | -11.26733126 | Down | 1.55E-26 | 6.39E-26 | AAEL006399-PA OS=Aedes aegypti GN=AAEL006399 PE=4 SV=1                                   |
| CCG006211.1 | 1806 | 102  | 0 | 2.42686209 | 0.001       | -11.24487641 | Down | 2.77E-36 | 1.21E-35 | AAEL003976-PA OS=Aedes aegypti GN=AAEL003976 PE=4 SV=1                                   |
| CCG004986.1 | 1638 | 90   | 0 | 2.36097443 | 0.001       | -11.2051667  | Down | 4.17E-32 | 1.78E-31 | AAEL000108-PA OS=Aedes aegypti GN=AAEL000108 PE=4 SV=1                                   |
| CCG011477.1 | 816  | 44   | 0 | 2.31699549 | 0.001       | -11.17803952 | Down | 4.31E-16 | 1.61E-15 | AAEL000725-PA OS=Aedes aegypti GN=AAEL000725 PE=4 SV=1                                   |
| CCG008724.1 | 714  | 38   | 0 | 2.28690464 | 0.001       | -11.1591805  | Down | 5.29E-14 | 1.78E-13 | AAEL013073-PA OS=Aedes aegypti GN=AAEL013073 PE=3 SV=1                                   |
| CCG026763.1 | 489  | 26   | 0 | 2.28468937 | 0.001       | -11.15778231 | Down | 7.96E-10 | 1.65E-09 | AAEL008473-PA OS=Aedes aegypti GN=AAEL008473 PE=4 SV=1                                   |
| CCG024954.1 | 744  | 39   | 0 | 2.25244577 | 0.001       | -11.13727665 | Down | 2.37E-14 | 8.27E-14 | AAEL013325-PA OS=Aedes aegypti GN=AAEL013325 PE=4 SV=1                                   |
| CCG020247.1 | 1302 | 68   | 0 | 2.24419505 | 0.001       | -11.13198235 | Down | 1.90E-24 | 7.69E-24 | Uncharacterized protein OS=Anopheles darlingi GN=AND_15514 PE=4 SV=1                     |
| CCG014398.1 | 1908 | 98   | 0 | 2.20704088 | 0.001       | -11.10789763 | Down | 6.84E-35 | 2.96E-34 | Putative uncharacterized protein OS=Culex quinquefasciatus GN=CpipJ_CPIJ018057 PE=4 SV=1 |
| CCG012935.1 | 378  | 19   | 0 | 2.15985439 | 0.001       | -11.07671834 | Down | 2.18E-07 | 4.12E-07 | AAEL002003-PA OS=Aedes aegypti GN=AAEL002003 PE=4 SV=1                                   |
| CCG017756.1 | 1269 | 1748 | 1 | 59.189201  | 0.027547893 | -11.06917627 | Down | 0        | 0        | AAEL010882-PA OS=Aedes aegypti GN=AAEL010882 PE=4 SV=1                                   |
| CCG027833.1 | 363  | 18   | 0 | 2.13073064 | 0.001       | -11.05713251 | Down | 4.86E-07 | 9.07E-07 | AAEL017144-PA OS=Aedes aegypti PE=4 SV=1                                                 |
| CCG005291.1 | 549  | 1722 | 1 | 134.779386 | 0.063676278 | -11.04755622 | Down | 0        | 0        | Cuticle protein OS=Culex quinquefasciatus GN=CpipJ_CPIJ003477 PE=4 SV=1                  |
| CCG010435.1 | 552  | 27   | 0 | 2.1017805  | 0.001       | -11.03739629 | Down | 3.57E-10 | 7.50E-10 | AAEL012690-PA OS=Aedes aegypti GN=AAEL012690 PE=4 SV=1                                   |

|             |      |      |   |            |             |              |      |          |          |                                                                                                                               |
|-------------|------|------|---|------------|-------------|--------------|------|----------|----------|-------------------------------------------------------------------------------------------------------------------------------|
| CCG026297.1 | 1476 | 72   | 0 | 2.09608462 | 0.001       | -11.03348124 | Down | 7.70E-26 | 3.15E-25 | -                                                                                                                             |
| CCG023196.1 | 1245 | 1699 | 1 | 58.6390194 | 0.028078937 | -11.02815693 | Down | 0        | 0        | AAEL002000-PA OS=Aedes aegypti GN=AAEL002000 PE=3 SV=1                                                                        |
| CCG012388.1 | 1518 | 73   | 0 | 2.06639699 | 0.001       | -11.01290173 | Down | 3.45E-26 | 1.42E-25 | AAEL001658-PA OS=Aedes aegypti GN=AAEL001658 PE=4 SV=1                                                                        |
| CCG002150.1 | 2247 | 106  | 0 | 2.02705468 | 0.001       | -10.98516929 | Down | 1.12E-37 | 4.94E-37 | AAEL000382-PA OS=Aedes aegypti GN=AAEL000382 PE=4 SV=1                                                                        |
| CCG015924.1 | 831  | 39   | 0 | 2.01663014 | 0.001       | -10.9777308  | Down | 2.37E-14 | 8.28E-14 | Uncharacterized protein OS=Anopheles darlingi GN=AND_08032 PE=4 SV=1                                                          |
| CCG007804.2 | 5748 | 267  | 0 | 1.99598454 | 0.001       | -10.96288483 | Down | 9.97E-94 | 5.21E-93 | AAEL005109-PA OS=Aedes aegypti GN=AAEL005109 PE=4 SV=1                                                                        |
| CCG002228.1 | 1188 | 1601 | 1 | 57.9078663 | 0.029426159 | -10.94244439 | Down | 0        | 0        | AAEL002715-PA OS=Aedes aegypti GN=SRPN22 PE=3 SV=1                                                                            |
| CCG009060.1 | 969  | 44   | 0 | 1.9511541  | 0.001       | -10.93011201 | Down | 4.31E-16 | 1.61E-15 | AAEL002689-PA OS=Aedes aegypti GN=AAEL002689 PE=4 SV=1                                                                        |
| CCG019807.1 | 1611 | 73   | 0 | 1.94710778 | 0.001       | -10.92711703 | Down | 3.45E-26 | 1.42E-25 | AAEL007121-PA OS=Aedes aegypti GN=AAEL007121 PE=4 SV=1                                                                        |
| CCG016431.1 | 468  | 21   | 0 | 1.92812912 | 0.001       | -10.91298595 | Down | 4.38E-08 | 8.54E-08 | AAEL002383-PA OS=Aedes aegypti GN=AAEL002383 PE=4 SV=1                                                                        |
| CCG024050.1 | 1725 | 76   | 0 | 1.89315932 | 0.001       | -10.88658011 | Down | 3.12E-27 | 1.29E-26 | AAEL001658-PA OS=Aedes aegypti GN=AAEL001658 PE=4 SV=1                                                                        |
| CCG021896.1 | 369  | 16   | 0 | 1.86318633 | 0.001       | -10.86355624 | Down | 2.41E-06 | 4.35E-06 | AAEL003177-PA OS=Aedes aegypti GN=AAEL003177 PE=4 SV=1                                                                        |
| CCG007555.1 | 1098 | 47   | 0 | 1.8393238  | 0.001       | -10.84495976 | Down | 3.89E-17 | 1.47E-16 | AAEL004705-PA OS=Aedes aegypti GN=AAEL004705 PE=4 SV=1                                                                        |
| CCG006909.1 | 1056 | 1492 | 1 | 60.7110266 | 0.033104429 | -10.84071862 | Down | 0        | 0        | AAEL010114-PA OS=Aedes aegypti GN=AAEL010114 PE=4 SV=1                                                                        |
| CCG017791.1 | 288  | 12   | 0 | 1.79040561 | 0.001       | -10.80607075 | Down | 5.96E-05 | 9.92E-05 | AAEL006722-PA OS=Aedes aegypti GN=AAEL006722 PE=4 SV=1                                                                        |
| CCG006970.1 | 384  | 16   | 0 | 1.79040561 | 0.001       | -10.80607075 | Down | 2.41E-06 | 4.35E-06 | AAEL010657-PA OS=Aedes aegypti GN=AAEL010657 PE=4 SV=1                                                                        |
| CCG026638.1 | 1104 | 46   | 0 | 1.79040561 | 0.001       | -10.80607075 | Down | 8.68E-17 | 3.27E-16 | -                                                                                                                             |
| CCG000598.1 | 1851 | 77   | 0 | 1.78750382 | 0.001       | -10.80373061 | Down | 1.40E-27 | 5.80E-27 | Hyperpolarization activated cyclic nucleotide-gated potassium channel OS=Culex quinquefasciatus GN=CpipJ_CPIJ001483 PE=4 SV=1 |

|             |      |    |   |            |       |              |      |          |          |                                                                      |
|-------------|------|----|---|------------|-------|--------------|------|----------|----------|----------------------------------------------------------------------|
| CCG027254.1 | 1074 | 43 | 0 | 1.72038975 | 0.001 | -10.74851972 | Down | 9.61E-16 | 3.50E-15 | AAEL009514-PA OS=Aedes aegypti GN=AAEL009514 PE=4 SV=1               |
| CCG003041.1 | 1035 | 41 | 0 | 1.70218272 | 0.001 | -10.7331702  | Down | 4.78E-15 | 1.72E-14 | AAEL013496-PA OS=Aedes aegypti GN=PPO8 PE=4 SV=1                     |
| CCG004505.1 | 1674 | 66 | 0 | 1.69414724 | 0.001 | -10.72634355 | Down | 9.45E-24 | 3.80E-23 | AAEL007188-PA (Fragment) OS=Aedes aegypti GN=AAEL007188 PE=4 SV=1    |
| CCG018700.1 | 897  | 35 | 0 | 1.67663402 | 0.001 | -10.71135209 | Down | 5.86E-13 | 1.50E-12 | -                                                                    |
| CCG025446.1 | 720  | 28 | 0 | 1.67104524 | 0.001 | -10.70653507 | Down | 1.60E-10 | 3.41E-10 | AAEL003644-PA OS=Aedes aegypti GN=AAEL003644 PE=4 SV=1               |
| CCG014364.1 | 1161 | 45 | 0 | 1.66549359 | 0.001 | -10.70173409 | Down | 1.93E-16 | 7.26E-16 | Lipase OS=Aedes aegypti GN=AAEL004925 PE=3 SV=1                      |
| CCG012027.1 | 414  | 16 | 0 | 1.66066607 | 0.001 | -10.69754629 | Down | 2.41E-06 | 4.35E-06 | AAEL013513-PA OS=Aedes aegypti GN=AAEL013513 PE=4 SV=1               |
| CCG020823.1 | 393  | 15 | 0 | 1.64006621 | 0.001 | -10.67953834 | Down | 5.38E-06 | 9.55E-06 | -                                                                    |
| CCG019735.1 | 1365 | 52 | 0 | 1.63694227 | 0.001 | -10.67678773 | Down | 7.07E-19 | 2.73E-18 | GD15416 OS=Drosophila simulans GN=GD15416 PE=3 SV=1                  |
| CCG027590.1 | 795  | 30 | 0 | 1.62149942 | 0.001 | -10.66311279 | Down | 3.23E-11 | 7.00E-11 | -                                                                    |
| CCG002045.1 | 1116 | 42 | 0 | 1.61714055 | 0.001 | -10.65922936 | Down | 2.14E-15 | 7.77E-15 | AAEL009949-PA OS=Aedes aegypti GN=AAEL009949 PE=3 SV=1               |
| CCG004710.1 | 348  | 13 | 0 | 1.60519124 | 0.001 | -10.64852947 | Down | 2.67E-05 | 4.57E-05 | AAEL009000-PA OS=Aedes aegypti GN=AAEL009000 PE=4 SV=1               |
| CCG027536.1 | 618  | 23 | 0 | 1.59919724 | 0.001 | -10.64313217 | Down | 8.82E-09 | 1.76E-08 | Ecdysis triggering hormone OS=Aedes aegypti PE=2 SV=1                |
| CCG010494.1 | 711  | 26 | 0 | 1.57132644 | 0.001 | -10.61776721 | Down | 7.96E-10 | 1.65E-09 | AAEL009963-PA OS=Aedes aegypti GN=AAEL009963 PE=4 SV=1               |
| CCG005203.1 | 771  | 28 | 0 | 1.56050917 | 0.001 | -10.60780112 | Down | 1.60E-10 | 3.41E-10 | AAEL006429-PA OS=Aedes aegypti GN=AAEL006429 PE=3 SV=1               |
| CCG002844.1 | 387  | 14 | 0 | 1.55446068 | 0.001 | -10.60219841 | Down | 1.20E-05 | 2.09E-05 | -                                                                    |
| CCG025751.1 | 1392 | 50 | 0 | 1.54345311 | 0.001 | -10.59194594 | Down | 3.51E-18 | 1.34E-17 | Uncharacterized protein OS=Anopheles darlingi GN=AND_13111 PE=3 SV=1 |
| CCG008230.1 | 474  | 17 | 0 | 1.54110863 | 0.001 | -10.58975284 | Down | 1.08E-06 | 1.99E-06 | -                                                                    |
| CCG004628.1 | 621  | 22 | 0 | 1.52227723 | 0.001 | -10.57201541 | Down | 1.97E-08 | 3.88E-08 | AAEL008440-PA OS=Aedes aegypti GN=AAEL008440 PE=4 SV=1               |
| CCG003688.1 | 654  | 23 | 0 | 1.51116804 | 0.001 | -10.56144838 | Down | 8.82E-09 | 1.76E-08 | AAEL002275-PA OS=Aedes aegypti GN=AAEL002275 PE=4 SV=1               |

|             |      |      |   |            |             |              |      |          |          |                                                                                                                                     |
|-------------|------|------|---|------------|-------------|--------------|------|----------|----------|-------------------------------------------------------------------------------------------------------------------------------------|
| CCG015893.1 | 831  | 29   | 0 | 1.49954549 | 0.001       | -10.55030957 | Down | 7.19E-11 | 1.54E-10 | Uncharacterized protein OS=Anopheles darlingi<br>GN=AND_08032 PE=4 SV=1                                                             |
| CCG007130.1 | 375  | 13   | 0 | 1.48961747 | 0.001       | -10.54072618 | Down | 2.67E-05 | 4.57E-05 | AAEL005810-PA OS=Aedes aegypti GN=AAEL005810<br>PE=4 SV=1                                                                           |
| CCG018645.1 | 552  | 19   | 0 | 1.47903072 | 0.001       | -10.5304363  | Down | 2.18E-07 | 4.12E-07 | AAEL013917-PA OS=Aedes aegypti GN=AAEL013917<br>PE=4 SV=1                                                                           |
| CCG008356.1 | 438  | 15   | 0 | 1.47156625 | 0.001       | -10.52313678 | Down | 5.38E-06 | 9.55E-06 | AAEL012061-PA OS=Aedes aegypti GN=AAEL012061<br>PE=4 SV=1                                                                           |
| CCG021471.1 | 588  | 20   | 0 | 1.4615556  | 0.001       | -10.513289   | Down | 9.77E-08 | 1.88E-07 | AAEL011586-PA OS=Aedes aegypti GN=AAEL011586<br>PE=4 SV=1                                                                           |
| CCG020273.1 | 381  | 2376 | 2 | 267.968739 | 0.183508015 | -10.51200592 | Down | 0        | 0        | Cuticle protein OS=Culex quinquefasciatus<br>GN=CpipJ_CPIJ003476 PE=4 SV=1                                                          |
| CCG005201.1 | 471  | 2354 | 2 | 214.757442 | 0.148442789 | -10.4985854  | Down | 0        | 0        | AAEL006429-PA OS=Aedes aegypti GN=AAEL006429<br>PE=3 SV=1                                                                           |
| CCG004738.1 | 1851 | 62   | 0 | 1.43928879 | 0.001       | -10.49114038 | Down | 2.33E-22 | 9.29E-22 | Hyperpolarization activated cyclic nucleotide-gated<br>potassium channel OS=Culex quinquefasciatus<br>GN=CpipJ_CPIJ001483 PE=4 SV=1 |
| CCG013328.1 | 459  | 15   | 0 | 1.40423969 | 0.001       | -10.4555735  | Down | 5.38E-06 | 9.55E-06 | AAEL005034-PA OS=Aedes aegypti GN=AAEL005034<br>PE=3 SV=1                                                                           |
| CCG020053.1 | 648  | 21   | 0 | 1.3925377  | 0.001       | -10.44350067 | Down | 4.38E-08 | 8.54E-08 | -                                                                                                                                   |
| CCG026112.1 | 1161 | 1123 | 1 | 41.5633178 | 0.030110488 | -10.43082901 | Down | 0        | 0        | AAEL009025-PA OS=Aedes aegypti GN=AAEL009025<br>PE=4 SV=1                                                                           |
| CCG010391.1 | 813  | 26   | 0 | 1.37418586 | 0.001       | -10.42436142 | Down | 7.96E-10 | 1.65E-09 | -                                                                                                                                   |
| CCG011264.1 | 345  | 11   | 0 | 1.37004951 | 0.001       | -10.42001231 | Down | 0.000133 | 0.000216 | AAEL008251-PA OS=Aedes aegypti GN=AAEL008251<br>PE=4 SV=1                                                                           |
| CCG017307.1 | 792  | 25   | 0 | 1.35636789 | 0.001       | -10.40553282 | Down | 1.78E-09 | 3.63E-09 | AAEL002361-PA OS=Aedes aegypti GN=AAEL002361<br>PE=4 SV=1                                                                           |
| CCG012487.1 | 735  | 23   | 0 | 1.34463115 | 0.001       | -10.39299476 | Down | 8.82E-09 | 1.76E-08 | AGAP013022-PA OS=Anopheles gambiae<br>GN=AgaP_AGAP013022 PE=4 SV=1                                                                  |
| CCG008720.1 | 324  | 10   | 0 | 1.32622638 | 0.001       | -10.37311134 | Down | 0.000296 | 0.000471 | AAEL006662-PA OS=Aedes aegypti GN=AAEL006662<br>PE=4 SV=1                                                                           |
| CCG002196.1 | 682  | 21   | 0 | 1.323115   | 0.001       | -10.36972274 | Down | 4.38E-08 | 8.54E-08 | Putative uncharacterized protein OS=Culex quinquefasciatus<br>GN=CpipJ_CPIJ007192 PE=4 SV=1                                         |
| CCG009213.1 | 591  | 18   | 0 | 1.30872288 | 0.001       | -10.35394393 | Down | 4.86E-07 | 9.07E-07 | AAEL009707-PA OS=Aedes aegypti GN=AAEL009707<br>PE=4 SV=1                                                                           |

|             |      |      |   |            |             |              |      |          |          |                                                                                                                |
|-------------|------|------|---|------------|-------------|--------------|------|----------|----------|----------------------------------------------------------------------------------------------------------------|
| CCG020377.1 | 741  | 22   | 0 | 1.2757546  | 0.001       | -10.31713513 | Down | 1.97E-08 | 3.88E-08 | AAEL004335-PA OS=Aedes aegypti GN=AAEL004335 PE=4 SV=1                                                         |
| CCG018289.1 | 1830 | 54   | 0 | 1.26795938 | 0.001       | -10.30829282 | Down | 1.42E-19 | 5.53E-19 | Malic enzyme OS=Aedes aegypti GN=AAEL001073 PE=3 SV=1                                                          |
| CCG014551.1 | 445  | 13   | 0 | 1.25529562 | 0.001       | -10.29381144 | Down | 2.67E-05 | 4.57E-05 | -                                                                                                              |
| CCG027620.1 | 420  | 12   | 0 | 1.2277067  | 0.001       | -10.26175023 | Down | 5.96E-05 | 9.91E-05 | AAEL008967-PA OS=Aedes aegypti GN=AAEL008967 PE=4 SV=1                                                         |
| CCG019941.1 | 783  | 22   | 0 | 1.20732332 | 0.001       | -10.23759637 | Down | 1.97E-08 | 3.88E-08 | Putative uncharacterized protein OS=Culex quinquefasciatus GN=CpipJ_CPIJ011970 PE=4 SV=1                       |
| CCG021507.1 | 879  | 24   | 0 | 1.17323508 | 0.001       | -10.19627639 | Down | 3.96E-09 | 8.00E-09 | AAEL010413-PA OS=Aedes aegypti GN=AAEL010413 PE=4 SV=1                                                         |
| CCG011150.1 | 702  | 19   | 0 | 1.16299852 | 0.001       | -10.18363354 | Down | 2.18E-07 | 4.12E-07 | Putative uncharacterized protein OS=Culex quinquefasciatus GN=CpipJ_CPIJ015444 PE=4 SV=1                       |
| CCG001977.1 | 372  | 10   | 0 | 1.15510039 | 0.001       | -10.17380253 | Down | 0.000296 | 0.000472 | AAEL007682-PA OS=Aedes aegypti GN=AAEL007682 PE=4 SV=1                                                         |
| CCG001443.1 | 372  | 10   | 0 | 1.15510039 | 0.001       | -10.17380253 | Down | 0.000296 | 0.000472 | AAEL003256-PA OS=Aedes aegypti GN=AAEL003256 PE=4 SV=1                                                         |
| CCG022164.1 | 450  | 12   | 0 | 1.14585959 | 0.001       | -10.16221456 | Down | 5.96E-05 | 9.92E-05 | AAEL013722-PA OS=Aedes aegypti GN=AAEL013722 PE=4 SV=1                                                         |
| CCG005571.1 | 417  | 11   | 0 | 1.1334942  | 0.001       | -10.14656129 | Down | 0.000133 | 0.000216 | Putative uncharacterized protein OS=Culex quinquefasciatus GN=CpipJ_CPIJ009105 PE=4 SV=1                       |
| CCG014525.1 | 624  | 1780 | 2 | 122.573922 | 0.112045759 | -10.09534832 | Down | 0        | 0        | AAEL010824-PA OS=Aedes aegypti GN=AAEL010824 PE=4 SV=1                                                         |
| CCG011586.1 | 882  | 22   | 0 | 1.07180744 | 0.001       | -10.06583002 | Down | 1.97E-08 | 3.88E-08 | -                                                                                                              |
| CCG011468.3 | 2007 | 50   | 0 | 1.07049663 | 0.001       | -10.06406453 | Down | 3.51E-18 | 1.34E-17 | AAEL010689-PA OS=Aedes aegypti GN=AAEL010689 PE=4 SV=1                                                         |
| CCG014334.1 | 846  | 21   | 0 | 1.06662462 | 0.001       | -10.05883682 | Down | 4.38E-08 | 8.54E-08 | Guanine nucleotide exchange factor, putative OS=Pediculus humanus subsp. corporis GN=Phum_PHUM503240 PE=4 SV=1 |
| CCG000300.1 | 1719 | 42   | 0 | 1.04987135 | 0.001       | -10.03599684 | Down | 2.14E-15 | 7.76E-15 | AAEL009860-PA OS=Aedes aegypti GN=AAEL009860 PE=4 SV=1                                                         |
| CCG021870.1 | 1065 | 26   | 0 | 1.04902639 | 0.001       | -10.03483525 | Down | 7.96E-10 | 1.65E-09 | AAEL001333-PA OS=Aedes aegypti GN=AAEL001333 PE=4 SV=1                                                         |
| CCG026493.1 | 915  | 22   | 0 | 1.03315209 | 0.001       | -10.01283693 | Down | 1.97E-08 | 3.88E-08 | Uncharacterized protein OS=Anopheles darlingi GN=AND_11211 PE=4 SV=1                                           |

|             |      |      |   |            |             |              |      |           |           |                                                                                          |
|-------------|------|------|---|------------|-------------|--------------|------|-----------|-----------|------------------------------------------------------------------------------------------|
| CCG021062.1 | 459  | 11   | 0 | 1.02977578 | 0.001       | -10.00811452 | Down | 0.000133  | 0.000216  | Putative uncharacterized protein OS=Culex quinquefasciatus GN=CpipJ_CPIJ010139 PE=4 SV=1 |
| CCG019955.1 | 420  | 813  | 1 | 83.1771291 | 0.083233992 | -9.964798338 | Down | 3.67E-281 | 2.29E-280 | AAEL012573-PA OS=Aedes aegypti GN=AAEL012573 PE=4 SV=1                                   |
| CCG005289.1 | 468  | 1616 | 2 | 148.374126 | 0.149394345 | -9.955898279 | Down | 0         | 0         | AAEL002181-PA OS=Aedes aegypti GN=AAEL002181 PE=4 SV=1                                   |
| CCG021466.1 | 488  | 11   | 0 | 0.96858008 | 0.001       | -9.919727527 | Down | 0.000133  | 0.000216  | -                                                                                        |
| CCG022312.1 | 1170 | 26   | 0 | 0.95488299 | 0.001       | -9.89918015  | Down | 7.96E-10  | 1.65E-09  | AAEL001340-PA (Fragment) OS=Aedes aegypti GN=AAEL001340 PE=4 SV=1                        |
| CCG021342.1 | 552  | 12   | 0 | 0.93412467 | 0.001       | -9.86747129  | Down | 5.96E-05  | 9.92E-05  | AAEL012690-PA OS=Aedes aegypti GN=AAEL012690 PE=4 SV=1                                   |
| CCG008953.1 | 663  | 14   | 0 | 0.90735488 | 0.001       | -9.825523108 | Down | 1.20E-05  | 2.09E-05  | AAEL010201-PA OS=Aedes aegypti GN=AAEL010201 PE=4 SV=1                                   |
| CCG011393.1 | 570  | 12   | 0 | 0.90462599 | 0.001       | -9.821177638 | Down | 5.96E-05  | 9.92E-05  | AAEL000645-PA OS=Aedes aegypti GN=AAEL000645 PE=4 SV=1                                   |
| CCG023070.1 | 906  | 1465 | 2 | 69.481966  | 0.077170589 | -9.814371745 | Down | 0         | 0         | -                                                                                        |
| CCG021485.1 | 630  | 13   | 0 | 0.88667706 | 0.001       | -9.792264946 | Down | 2.67E-05  | 4.57E-05  | -                                                                                        |
| CCG015216.1 | 534  | 11   | 0 | 0.88514435 | 0.001       | -9.789768933 | Down | 0.000133  | 0.000216  | AAEL000085-PA OS=Aedes aegypti GN=AAEL000085 PE=4 SV=1                                   |
| CCG026792.1 | 978  | 20   | 0 | 0.87872668 | 0.001       | -9.779270686 | Down | 9.77E-08  | 1.88E-07  | AAEL009463-PA (Fragment) OS=Aedes aegypti GN=AAEL009463 PE=4 SV=1                        |
| CCG009628.1 | 981  | 20   | 0 | 0.87603944 | 0.001       | -9.774852015 | Down | 9.77E-08  | 1.88E-07  | AAEL004557-PA OS=Aedes aegypti GN=AAEL004557 PE=4 SV=1                                   |
| CCG008172.1 | 495  | 10   | 0 | 0.86807545 | 0.001       | -9.761676626 | Down | 0.000296  | 0.000472  | -                                                                                        |
| CCG004606.1 | 1302 | 26   | 0 | 0.85807458 | 0.001       | -9.744959231 | Down | 7.96E-10  | 1.65E-09  | AAEL013008-PA OS=Aedes aegypti GN=AAEL013008 PE=4 SV=1                                   |
| CCG028100.1 | 657  | 13   | 0 | 0.85023828 | 0.001       | -9.731723404 | Down | 2.67E-05  | 4.57E-05  | AAEL008168-PA OS=Aedes aegypti GN=AAEL008168 PE=4 SV=1                                   |
| CCG018091.1 | 1215 | 24   | 0 | 0.84878488 | 0.001       | -9.729255149 | Down | 3.96E-09  | 8.00E-09  | AAEL001053-PA OS=Aedes aegypti GN=AAEL001053 PE=4 SV=1                                   |
| CCG025964.1 | 1743 | 34   | 0 | 0.83819333 | 0.001       | -9.711139233 | Down | 1.31E-12  | 3.17E-12  | AAEL000873-PA (Fragment) OS=Aedes aegypti GN=AAEL000873 PE=3 SV=1                        |
| CCG018587.1 | 513  | 10   | 0 | 0.83761666 | 0.001       | -9.710146326 | Down | 0.000296  | 0.000471  | AAEL005966-PA OS=Aedes aegypti GN=AAEL005966 PE=4 SV=1                                   |
| CCG008792.1 | 568  | 11   | 0 | 0.83216035 | 0.001       | -9.700717745 | Down | 0.000133  | 0.000216  | -                                                                                        |

|             |      |      |   |            |             |              |      |          |          |                                                                                          |
|-------------|------|------|---|------------|-------------|--------------|------|----------|----------|------------------------------------------------------------------------------------------|
| CCG004917.1 | 723  | 14   | 0 | 0.83205572 | 0.001       | -9.700536331 | Down | 1.20E-05 | 2.09E-05 | -                                                                                        |
| CCG005599.1 | 1256 | 24   | 0 | 0.82107773 | 0.001       | -9.681374998 | Down | 3.96E-09 | 8.00E-09 | AAEL009780-PA OS=Aedes aegypti GN=AAEL009780 PE=3 SV=1                                   |
| CCG016788.1 | 753  | 14   | 0 | 0.79890609 | 0.001       | -9.641882114 | Down | 1.20E-05 | 2.09E-05 | AAEL002234-PA OS=Aedes aegypti GN=AAEL002234 PE=4 SV=1                                   |
| CCG026537.1 | 1416 | 26   | 0 | 0.7889923  | 0.001       | -9.623867414 | Down | 7.96E-10 | 1.65E-09 | AAEL002713-PA (Fragment) OS=Aedes aegypti GN=AAEL002713 PE=4 SV=1                        |
| CCG016364.1 | 552  | 10   | 0 | 0.77843722 | 0.001       | -9.604436884 | Down | 0.000296 | 0.000471 | Putative uncharacterized protein OS=Culex quinquefasciatus GN=CpipJ_CPIJ003311 PE=4 SV=1 |
| CCG001594.1 | 744  | 1220 | 2 | 70.461124  | 0.093973862 | -9.550352229 | Down | 0        | 0        | AAEL009239-PA OS=Aedes aegypti GN=AAEL009239 PE=4 SV=1                                   |
| CCG023020.1 | 177  | 1172 | 2 | 284.522763 | 0.395008777 | -9.492443651 | Down | 0        | 0        | AAEL006575-PA OS=Aedes aegypti GN=AAEL006575 PE=4 SV=1                                   |
| CCG004591.1 | 2694 | 45   | 0 | 0.71775726 | 0.001       | -9.487352207 | Down | 1.93E-16 | 7.26E-16 | AAEL005240-PA OS=Aedes aegypti GN=AAEL005240 PE=4 SV=1                                   |
| CCG003765.1 | 1407 | 23   | 0 | 0.70241926 | 0.001       | -9.456188589 | Down | 8.82E-09 | 1.76E-08 | AAEL005004-PA OS=Aedes aegypti GN=AAEL005004 PE=4 SV=1                                   |
| CCG012607.1 | 900  | 1135 | 2 | 54.1896098 | 0.077685059 | -9.446163378 | Down | 0        | 0        | AAEL009904-PA OS=Aedes aegypti GN=AAEL009904 PE=4 SV=1                                   |
| CCG024454.1 | 617  | 10   | 0 | 0.69643006 | 0.001       | -9.443834662 | Down | 0.000296 | 0.000472 | Putative uncharacterized protein OS=Tribolium castaneum GN=TcasGA2_TC006955 PE=4 SV=1    |
| CCG015647.1 | 1491 | 24   | 0 | 0.69166575 | 0.001       | -9.433931205 | Down | 3.96E-09 | 8.00E-09 | AAEL009258-PA OS=Aedes aegypti GN=AAEL009258 PE=4 SV=1                                   |
| CCG008326.1 | 1002 | 16   | 0 | 0.68614347 | 0.001       | -9.422366453 | Down | 2.41E-06 | 4.35E-06 | AAEL009098-PA OS=Aedes aegypti GN=AAEL009098 PE=4 SV=1                                   |
| CCG006007.1 | 755  | 12   | 0 | 0.68296267 | 0.001       | -9.415662913 | Down | 5.96E-05 | 9.92E-05 | Putative uncharacterized protein OS=Culex quinquefasciatus GN=CpipJ_CPIJ005028 PE=4 SV=1 |
| CCG022601.1 | 633  | 1110 | 2 | 75.3497716 | 0.110452691 | -9.414030757 | Down | 0        | 0        | -                                                                                        |
| CCG001665.1 | 1071 | 17   | 0 | 0.68205928 | 0.001       | -9.413753323 | Down | 1.08E-06 | 1.99E-06 | AAEL002911-PA (Fragment) OS=Aedes aegypti GN=AAEL002911 PE=4 SV=1                        |
| CCG020393.1 | 1458 | 23   | 0 | 0.67784904 | 0.001       | -9.404820198 | Down | 8.82E-09 | 1.76E-08 | Putative uncharacterized protein OS=Culex quinquefasciatus GN=CpipJ_CPIJ001348 PE=4 SV=1 |
| CCG008062.1 | 767  | 12   | 0 | 0.67227747 | 0.001       | -9.39291298  | Down | 5.96E-05 | 9.91E-05 | Putative uncharacterized protein OS=Culex quinquefasciatus GN=CpipJ_CPIJ018868 PE=4 SV=1 |

|             |      |     |   |            |             |              |      |           |           |                                                                      |
|-------------|------|-----|---|------------|-------------|--------------|------|-----------|-----------|----------------------------------------------------------------------|
| CCG010562.1 | 450  | 534 | 1 | 50.9907517 | 0.077685059 | -9.358382728 | Down | 3.28E-184 | 1.93E-183 | AAEL005891-PA OS=Aedes aegypti GN=AAEL005891 PE=4 SV=1               |
| CCG009531.1 | 1125 | 17  | 0 | 0.64932043 | 0.001       | -9.342786801 | Down | 1.08E-06  | 1.99E-06  | AAEL006484-PA OS=Aedes aegypti GN=GPROP3 PE=3 SV=1                   |
| CCG018582.1 | 819  | 12  | 0 | 0.62959318 | 0.001       | -9.298276105 | Down | 5.96E-05  | 9.92E-05  | AAEL001330-PA OS=Aedes aegypti GN=AAEL001330 PE=3 SV=1               |
| CCG027452.1 | 1170 | 17  | 0 | 0.62434657 | 0.001       | -9.286203273 | Down | 1.08E-06  | 1.99E-06  | AAEL011921-PA (Fragment) OS=Aedes aegypti GN=AAEL011921 PE=4 SV=1    |
| CCG016995.1 | 1008 | 503 | 1 | 21.4422386 | 0.03468083  | -9.272101386 | Down | 1.91E-173 | 1.11E-172 | AAEL010886-PA OS=Aedes aegypti GN=AAEL010886 PE=4 SV=1               |
| CCG016091.1 | 780  | 11  | 0 | 0.60598344 | 0.001       | -9.243134551 | Down | 0.000133  | 0.000216  | AAEL003311-PA OS=Aedes aegypti GN=AAEL003311 PE=4 SV=1               |
| CCG017551.1 | 855  | 12  | 0 | 0.603084   | 0.001       | -9.236215137 | Down | 5.96E-05  | 9.92E-05  | AAEL009488-PA OS=Aedes aegypti GN=AAEL009488 PE=4 SV=1               |
| CCG000905.1 | 856  | 12  | 0 | 0.60237946 | 0.001       | -9.234528761 | Down | 5.96E-05  | 9.92E-05  | Uncharacterized protein OS=Anopheles darlingi GN=AND_11211 PE=4 SV=1 |
| CCG003729.1 | 1509 | 21  | 0 | 0.59798835 | 0.001       | -9.223973579 | Down | 4.38E-08  | 8.54E-08  | AAEL007812-PA OS=Aedes aegypti GN=CYP4H32 PE=3 SV=1                  |
| CCG006445.1 | 720  | 10  | 0 | 0.59680187 | 0.001       | -9.221108245 | Down | 0.000296  | 0.000471  | AAEL009771-PA OS=Aedes aegypti GN=AAEL009771 PE=3 SV=1               |
| CCG019346.1 | 726  | 10  | 0 | 0.59186962 | 0.001       | -9.209135603 | Down | 0.000296  | 0.000472  | AAEL001256-PA OS=Aedes aegypti GN=AAEL001256 PE=4 SV=1               |
| CCG026240.1 | 762  | 10  | 0 | 0.56390728 | 0.001       | -9.139314154 | Down | 0.000296  | 0.000471  | AAEL009564-PA OS=Aedes aegypti GN=AAEL009564 PE=4 SV=1               |
| CCG016891.1 | 204  | 455 | 1 | 95.8393591 | 0.171364102 | -9.127409531 | Down | 8.90E-157 | 5.10E-156 | AGAP003937-PC OS=Anopheles gambiae GN=AgaP_AGAP003937 PE=4 SV=1      |
| CCG005142.1 | 1413 | 448 | 1 | 13.6238083 | 0.024740465 | -9.105041718 | Down | 2.40E-154 | 1.37E-153 | AAEL010365-PA OS=Aedes aegypti GN=AAEL010365 PE=4 SV=1               |
| CCG027160.1 | 2049 | 26  | 0 | 0.54524798 | 0.001       | -9.090768695 | Down | 7.96E-10  | 1.65E-09  | AGAP002293-PA OS=Anopheles gambiae GN=AGAP002293 PE=4 SV=3           |
| CCG024932.1 | 789  | 10  | 0 | 0.54461007 | 0.001       | -9.089079851 | Down | 0.000296  | 0.000471  | AAEL011450-PA OS=Aedes aegypti GN=AAEL011450 PE=3 SV=1               |
| CCG025374.1 | 1015 | 12  | 0 | 0.50801657 | 0.001       | -8.988731735 | Down | 5.96E-05  | 9.92E-05  | -                                                                    |
| CCG004697.1 | 780  | 358 | 1 | 19.7220064 | 0.044818304 | -8.781502573 | Down | 4.13E-123 | 2.27E-122 | -                                                                    |
| CCG001525.1 | 666  | 355 | 1 | 22.904288  | 0.052489905 | -8.769362011 | Down | 4.54E-122 | 2.49E-121 | -                                                                    |

|             |      |     |   |            |             |              |      |           |           |                                                                                                 |
|-------------|------|-----|---|------------|-------------|--------------|------|-----------|-----------|-------------------------------------------------------------------------------------------------|
| CCG013939.1 | 1143 | 341 | 1 | 12.8194921 | 0.030584669 | -8.711314725 | Down | 3.26E-117 | 1.78E-116 | AAEL014193-PA OS=Aedes aegypti GN=AAEL014193 PE=4 SV=1                                          |
| CCG026055.1 | 360  | 321 | 1 | 38.31468   | 0.097106324 | -8.624116283 | Down | 2.82E-110 | 1.52E-109 | AAEL012715-PA OS=Aedes aegypti GN=AAEL012715 PE=4 SV=1                                          |
| CCG012757.1 | 573  | 308 | 1 | 23.0971697 | 0.061009209 | -8.564473337 | Down | 9.09E-106 | 4.85E-105 | AAEL008754-PA OS=Aedes aegypti GN=AAEL008754 PE=4 SV=1                                          |
| CCG001967.1 | 1140 | 10  | 0 | 0.3769275  | 0.001       | -8.558143232 | Down | 0.000296  | 0.000472  | Putative uncharacterized protein OS=Culex quinquefasciatus GN=CpipJ_CPIJ001348 PE=4 SV=1        |
| CCG006738.1 | 2055 | 608 | 2 | 12.7131867 | 0.034022654 | -8.54561431  | Down | 1.09E-207 | 6.51E-207 | AAEL003265-PA OS=Aedes aegypti GN=AAEL003265 PE=4 SV=1                                          |
| CCG027492.1 | 858  | 601 | 2 | 30.0988467 | 0.081487825 | -8.528907977 | Down | 2.90E-205 | 1.74E-204 | -                                                                                               |
| CCG009416.1 | 1200 | 10  | 0 | 0.35808112 | 0.001       | -8.484142651 | Down | 0.000296  | 0.000471  | AAEL002916-PA OS=Aedes aegypti GN=AAEL002916 PE=4 SV=1                                          |
| CCG007909.1 | 810  | 570 | 2 | 30.2379614 | 0.086316733 | -8.452504905 | Down | 1.62E-194 | 9.63E-194 | AAEL004659-PA OS=Aedes aegypti GN=AAEL004659 PE=4 SV=1                                          |
| CCG019703.1 | 516  | 559 | 2 | 46.5505458 | 0.135497197 | -8.424391269 | Down | 1.05E-190 | 6.25E-190 | AAEL013449-PA OS=Aedes aegypti GN=AAEL013449 PE=3 SV=1                                          |
| CCG025421.1 | 1539 | 12  | 0 | 0.33504666 | 0.001       | -8.388218231 | Down | 5.96E-05  | 9.92E-05  | AAEL004647-PA OS=Aedes aegypti GN=AAEL004647 PE=4 SV=1                                          |
| CCG027791.1 | 2109 | 16  | 0 | 0.32599135 | 0.001       | -8.348689867 | Down | 2.41E-06  | 4.35E-06  | AAEL003321-PA OS=Aedes aegypti GN=AAEL003321 PE=4 SV=1                                          |
| CCG026509.1 | 1008 | 259 | 1 | 11.0408346 | 0.03468083  | -8.314495084 | Down | 8.77E-89  | 4.55E-88  | AAEL010886-PA OS=Aedes aegypti GN=AAEL010886 PE=4 SV=1                                          |
| CCG009553.1 | 3315 | 24  | 0 | 0.3110931  | 0.001       | -8.281202592 | Down | 3.96E-09  | 8.00E-09  | Gamma-aminobutyric acid type B receptor OS=Culex quinquefasciatus GN=CpipJ_CPIJ002466 PE=4 SV=1 |
| CCG015653.1 | 1725 | 12  | 0 | 0.29891989 | 0.001       | -8.223615101 | Down | 5.96E-05  | 9.92E-05  | AAEL014010-PA (Fragment) OS=Aedes aegypti GN=AAEL014010 PE=4 SV=1                               |
| CCG024944.1 | 1749 | 12  | 0 | 0.29481808 | 0.001       | -8.203681173 | Down | 5.96E-05  | 9.92E-05  | AAEL009646-PA OS=Aedes aegypti GN=AAEL009646 PE=4 SV=1                                          |
| CCG025854.1 | 1386 | 453 | 2 | 14.0442206 | 0.050444844 | -8.121054036 | Down | 5.55E-154 | 3.17E-153 | AAEL010365-PA OS=Aedes aegypti GN=AAEL010365 PE=4 SV=1                                          |
| CCG018621.2 | 1665 | 445 | 2 | 11.4844035 | 0.041991924 | -8.095348322 | Down | 3.27E-151 | 1.86E-150 | -                                                                                               |
| CCG003506.1 | 228  | 220 | 1 | 41.4620246 | 0.153325775 | -8.07904651  | Down | 2.82E-75  | 1.42E-74  | -                                                                                               |
| CCG017474.1 | 363  | 437 | 2 | 51.729405  | 0.192607586 | -8.069176266 | Down | 1.92E-148 | 1.09E-147 | -                                                                                               |

|             |      |     |   |            |             |              |      |           |           |                                                                                             |
|-------------|------|-----|---|------------|-------------|--------------|------|-----------|-----------|---------------------------------------------------------------------------------------------|
| CCG019431.1 | 999  | 211 | 1 | 9.07568969 | 0.03499327  | -8.018785985 | Down | 3.68E-72  | 1.83E-71  | AAEL005714-PA (Fragment) OS=Aedes aegypti<br>GN=AAEL005714 PE=4 SV=1                        |
| CCG005574.1 | 249  | 210 | 1 | 36.2395352 | 0.140394686 | -8.011932314 | Down | 8.17E-72  | 4.07E-71  | -                                                                                           |
| CCG009792.1 | 1857 | 11  | 0 | 0.25453262 | 0.001       | -7.991706765 | Down | 0.000133  | 0.000216  | AGAP013374-PA OS=Anopheles gambiae<br>GN=AgaP_AGAP013374 PE=4 SV=1                          |
| CCG010212.1 | 396  | 207 | 1 | 22.4614522 | 0.088278477 | -7.991173754 | Down | 8.92E-71  | 4.43E-70  | -                                                                                           |
| CCG014453.1 | 1890 | 203 | 1 | 4.61526779 | 0.018496443 | -7.963022713 | Down | 2.16E-69  | 1.07E-68  | AAEL009204-PA OS=Aedes aegypti GN=AAEL009204<br>PE=3 SV=1                                   |
| CCG009637.1 | 825  | 397 | 2 | 20.6775571 | 0.084747338 | -7.930681993 | Down | 1.34E-134 | 7.47E-134 | AAEL013951-PA OS=Aedes aegypti GN=AAEL013951<br>PE=3 SV=1                                   |
| CCG018326.1 | 1785 | 10  | 0 | 0.24072681 | 0.001       | -7.911252982 | Down | 0.000296  | 0.000471  | AAEL003976-PA OS=Aedes aegypti GN=AAEL003976<br>PE=4 SV=1                                   |
| CCG026991.1 | 1923 | 372 | 2 | 8.31239796 | 0.036358062 | -7.836845607 | Down | 5.95E-126 | 3.28E-125 | AAEL010365-PA OS=Aedes aegypti GN=AAEL010365<br>PE=4 SV=1                                   |
| CCG028512.1 | 816  | 178 | 1 | 9.37329995 | 0.042841025 | -7.773420227 | Down | 9.59E-61  | 4.64E-60  | AAEL000725-PA OS=Aedes aegypti GN=AAEL000725<br>PE=4 SV=1                                   |
| CCG002290.1 | 486  | 171 | 1 | 15.1189807 | 0.071930611 | -7.715539311 | Down | 2.52E-58  | 1.21E-57  | -                                                                                           |
| CCG027991.1 | 756  | 167 | 1 | 9.49199164 | 0.046241107 | -7.681391089 | Down | 6.08E-57  | 2.91E-56  | AAEL006414-PA OS=Aedes aegypti GN=AAEL006414<br>PE=3 SV=1                                   |
| CCG004722.1 | 1488 | 333 | 2 | 9.61621077 | 0.046986931 | -7.677065163 | Down | 1.80E-112 | 9.74E-112 | AAEL006017-PA OS=Aedes aegypti GN=AAEL006017<br>PE=4 SV=1                                   |
| CCG023166.1 | 522  | 163 | 1 | 13.4177524 | 0.066969879 | -7.64641495  | Down | 1.47E-55  | 6.98E-55  | -                                                                                           |
| CCG021523.1 | 426  | 322 | 2 | 32.4794708 | 0.164123365 | -7.628603674 | Down | 1.14E-108 | 6.12E-108 | Putative uncharacterized protein OS=Culex quinquefasciatus<br>GN=CpipJ_CPIJ010703 PE=4 SV=1 |
| CCG009447.1 | 876  | 321 | 2 | 15.7457589 | 0.079813417 | -7.624116283 | Down | 2.53E-108 | 1.36E-107 | AAEL010658-PA OS=Aedes aegypti GN=AAEL010658<br>PE=4 SV=1                                   |
| CCG009182.1 | 381  | 150 | 1 | 16.9172184 | 0.091754007 | -7.526505487 | Down | 4.54E-51  | 2.12E-50  | AAEL000680-PA OS=Aedes aegypti GN=AAEL000680<br>PE=4 SV=1                                   |
| CCG018620.1 | 1314 | 293 | 2 | 9.58153139 | 0.053208945 | -7.492443651 | Down | 1.18E-98  | 6.24E-98  | -                                                                                           |
| CCG021173.1 | 2949 | 280 | 2 | 4.07986629 | 0.023708563 | -7.426969813 | Down | 3.62E-94  | 1.90E-93  | AAEL001340-PA (Fragment) OS=Aedes aegypti<br>GN=AAEL001340 PE=4 SV=1                        |
| CCG007958.1 | 1248 | 279 | 2 | 9.60621471 | 0.056022879 | -7.421808108 | Down | 8.02E-94  | 4.20E-93  | AAEL001713-PA OS=Aedes aegypti GN=AAEL001713<br>PE=4 SV=1                                   |
| CCG023716.1 | 531  | 139 | 1 | 11.248198  | 0.065834796 | -7.416627869 | Down | 2.84E-47  | 1.31E-46  | -                                                                                           |
| CCG014435.1 | 606  | 272 | 2 | 19.2867456 | 0.115373851 | -7.385149637 | Down | 2.09E-91  | 1.09E-90  | -                                                                                           |

|             |      |     |   |            |             |              |      |          |          |                                                                                          |
|-------------|------|-----|---|------------|-------------|--------------|------|----------|----------|------------------------------------------------------------------------------------------|
| CCG002913.1 | 1626 | 135 | 1 | 3.56759789 | 0.021499555 | -7.374502393 | Down | 6.83E-46 | 3.13E-45 | -                                                                                        |
| CCG021030.1 | 1260 | 135 | 1 | 4.60390014 | 0.027744664 | -7.374502393 | Down | 6.83E-46 | 3.13E-45 | Lipase OS=Aedes aegypti GN=AAEL012342 PE=3 SV=1                                          |
| CCG018732.1 | 1416 | 257 | 2 | 7.79888545 | 0.049376097 | -7.303311345 | Down | 3.11E-86 | 1.60E-85 | Uncharacterized protein OS=Anopheles darlingi GN=AND_15514 PE=4 SV=1                     |
| CCG017393.1 | 792  | 123 | 1 | 6.67333    | 0.044139238 | -7.240201302 | Down | 9.38E-42 | 4.22E-41 | AAEL006758-PA OS=Aedes aegypti GN=AAEL006758 PE=4 SV=1                                   |
| CCG014122.1 | 1872 | 241 | 2 | 5.53189425 | 0.037348586 | -7.210576132 | Down | 1.02E-80 | 5.18E-80 | AAEL000919-PA OS=Aedes aegypti GN=AAEL000919 PE=4 SV=1                                   |
| CCG005673.1 | 1389 | 236 | 2 | 7.30083324 | 0.050335892 | -7.180329846 | Down | 5.38E-79 | 2.73E-78 | AAEL005630-PA OS=Aedes aegypti GN=AAEL005630 PE=4 SV=1                                   |
| CCG010282.1 | 921  | 106 | 1 | 4.9454852  | 0.037956869 | -7.025607251 | Down | 6.73E-36 | 2.93E-35 | Ams protein transcript variant 1 (Fragment) OS=Aedes aegypti PE=2 SV=1                   |
| CCG011671.1 | 441  | 105 | 1 | 10.2308892 | 0.079270469 | -7.011932314 | Down | 1.49E-35 | 6.46E-35 | -                                                                                        |
| CCG007707.1 | 1875 | 182 | 2 | 4.17092891 | 0.037288829 | -6.805481436 | Down | 2.03E-60 | 9.83E-60 | Heat shock protein 70 B2 OS=Culex quinquefasciatus GN=CpipJ_CPIJ014564 PE=3 SV=1         |
| CCG004992.1 | 561  | 90  | 1 | 6.89354031 | 0.062314219 | -6.789539893 | Down | 2.13E-30 | 9.01E-30 | AAEL006357-PA OS=Aedes aegypti GN=AAEL006357 PE=4 SV=1                                   |
| CCG013652.1 | 4243 | 10  | 0 | 0.10127206 | 0.001       | -6.662092378 | Down | 0.000296 | 0.000471 | Putative uncharacterized protein OS=Tribolium castaneum GN=TcasGA2_TC012952 PE=4 SV=1    |
| CCG027811.1 | 168  | 153 | 2 | 39.1331512 | 0.416169962 | -6.555074639 | Down | 1.81E-50 | 8.44E-50 | Uncharacterized protein OS=Anopheles darlingi GN=AND_24739 PE=4 SV=1                     |
| CCG005036.1 | 1869 | 148 | 2 | 3.40263281 | 0.037408536 | -6.507140162 | Down | 9.32E-49 | 4.32E-48 | AAEL000919-PA OS=Aedes aegypti GN=AAEL000919 PE=4 SV=1                                   |
| CCG010203.1 | 906  | 145 | 2 | 6.87705466 | 0.077170589 | -6.477595886 | Down | 9.92E-48 | 4.58E-47 | Putative uncharacterized protein OS=Culex quinquefasciatus GN=CpipJ_CPIJ003706 PE=4 SV=1 |
| CCG007880.1 | 516  | 137 | 2 | 11.4086311 | 0.135497197 | -6.395718879 | Down | 5.41E-45 | 2.47E-44 | AGAP006830-PA OS=Anopheles gambiae GN=CPR58 PE=4 SV=3                                    |
| CCG021556.1 | 1170 | 61  | 1 | 2.2403024  | 0.029878869 | -6.228424134 | Down | 1.83E-20 | 7.17E-20 | AAEL008325-PA OS=Aedes aegypti GN=AAEL008325 PE=4 SV=1                                   |
| CCG000255.1 | 1397 | 122 | 2 | 3.75254662 | 0.05004764  | -6.228424134 | Down | 7.20E-40 | 3.21E-39 | Putative uncharacterized protein OS=Tribolium castaneum GN=TcasGA2_TC004282 PE=4 SV=1    |
| CCG005630.1 | 654  | 115 | 2 | 7.55584018 | 0.106906045 | -6.143176847 | Down | 1.76E-37 | 7.73E-37 | AAEL002275-PA OS=Aedes aegypti GN=AAEL002275 PE=4 SV=1                                   |
| CCG006435.1 | 711  | 110 | 2 | 6.64791956 | 0.098335518 | -6.07904651  | Down | 8.86E-36 | 3.86E-35 | -                                                                                        |

|             |      |     |   |            |             |              |      |          |          |                                                                                          |
|-------------|------|-----|---|------------|-------------|--------------|------|----------|----------|------------------------------------------------------------------------------------------|
| CCG026290.1 | 903  | 108 | 2 | 5.13923736 | 0.07742697  | -6.052574298 | Down | 4.25E-35 | 1.84E-34 | Putative uncharacterized protein OS=Culex quinquefasciatus GN=CpipJ_CPIJ003706 PE=4 SV=1 |
| CCG006529.1 | 771  | 107 | 2 | 5.96337432 | 0.090682949 | -6.039153783 | Down | 9.31E-35 | 4.03E-34 | AAEL003030-PA OS=Aedes aegypti GN=AAEL003030 PE=4 SV=1                                   |
| CCG025295.1 | 915  | 98  | 2 | 4.60222294 | 0.076411534 | -5.91239664  | Down | 1.07E-31 | 4.54E-31 | -                                                                                        |
| CCG023488.2 | 2808 | 91  | 2 | 1.3925377  | 0.024899058 | -5.805481436 | Down | 2.53E-29 | 1.06E-28 | AAEL000512-PA OS=Aedes aegypti GN=AAEL000512 PE=4 SV=1                                   |
| CCG017840.1 | 357  | 45  | 1 | 5.4163531  | 0.097922344 | -5.789539893 | Down | 5.10E-15 | 1.84E-14 | AAEL002878-PA OS=Aedes aegypti GN=AAEL002878 PE=4 SV=1                                   |
| CCG008063.1 | 3114 | 90  | 2 | 1.24189984 | 0.022452329 | -5.789539893 | Down | 5.52E-29 | 2.32E-28 | Uncharacterized protein OS=Anopheles darlingi GN=AND_00371 PE=4 SV=1                     |
| CCG003575.1 | 339  | 45  | 1 | 5.70394707 | 0.10312176  | -5.789539893 | Down | 5.10E-15 | 1.84E-14 | Putative uncharacterized protein OS=Culex quinquefasciatus GN=CpipJ_CPIJ012243 PE=4 SV=1 |
| CCG009968.1 | 438  | 90  | 2 | 8.82939752 | 0.159626835 | -5.789539893 | Down | 5.52E-29 | 2.31E-28 | AAEL010134-PA OS=Aedes aegypti GN=AAEL010134 PE=4 SV=1                                   |
| CCG002312.1 | 855  | 89  | 2 | 4.47287296 | 0.081773747 | -5.773420227 | Down | 1.20E-28 | 5.04E-28 | -                                                                                        |
| CCG027982.1 | 468  | 87  | 2 | 7.98796349 | 0.149394345 | -5.740630292 | Down | 5.73E-28 | 2.38E-27 | -                                                                                        |
| CCG013025.1 | 319  | 40  | 1 | 5.3880545  | 0.109587075 | -5.619614891 | Down | 2.51E-13 | 7.06E-13 | -                                                                                        |
| CCG027801.1 | 1902 | 78  | 2 | 1.76216577 | 0.036759492 | -5.583089015 | Down | 6.31E-25 | 2.56E-24 | AAEL011020-PA OS=Aedes aegypti GN=AAEL011020 PE=4 SV=1                                   |
| CCG006174.1 | 1104 | 75  | 2 | 2.91913958 | 0.063330212 | -5.526505487 | Down | 6.48E-24 | 2.61E-23 | AAEL011375-PA OS=Aedes aegypti GN=AAEL011375 PE=3 SV=1                                   |
| CCG021512.1 | 1068 | 37  | 1 | 1.48865186 | 0.032732469 | -5.507140162 | Down | 2.59E-12 | 6.09E-12 | AAEL001333-PA OS=Aedes aegypti GN=AAEL001333 PE=4 SV=1                                   |
| CCG000302.1 | 630  | 71  | 2 | 4.84262089 | 0.110978656 | -5.447433916 | Down | 1.44E-22 | 5.74E-22 | AAEL000359-PA OS=Aedes aegypti GN=AAEL000359 PE=4 SV=1                                   |
| CCG013146.1 | 854  | 35  | 1 | 1.7610547  | 0.04093475  | -5.426969813 | Down | 1.22E-11 | 2.71E-11 | Putative uncharacterized protein OS=Aedes aegypti PE=4 SV=1                              |
| CCG024787.1 | 366  | 34  | 1 | 3.99172398 | 0.095514417 | -5.385149637 | Down | 2.65E-11 | 5.78E-11 | AAEL011906-PA OS=Aedes aegypti GN=AAEL011906 PE=3 SV=1                                   |
| CCG020434.1 | 1566 | 67  | 2 | 1.83842415 | 0.044646586 | -5.363775987 | Down | 3.19E-21 | 1.26E-20 | AAEL003576-PA OS=Aedes aegypti GN=AAEL003576 PE=4 SV=1                                   |
| CCG004896.1 | 447  | 33  | 1 | 3.17226229 | 0.078206436 | -5.342080916 | Down | 5.75E-11 | 1.24E-10 | AAEL011685-PA OS=Aedes aegypti GN=AAEL011685 PE=4 SV=1                                   |

|             |      |    |   |            |             |              |      |          |          |                                                                                              |
|-------------|------|----|---|------------|-------------|--------------|------|----------|----------|----------------------------------------------------------------------------------------------|
| CCG005780.1 | 309  | 33 | 1 | 4.58900078 | 0.113133582 | -5.342080916 | Down | 5.75E-11 | 1.24E-10 | AAEL013161-PA OS=Aedes aegypti GN=AAEL013161 PE=3 SV=1                                       |
| CCG019299.1 | 351  | 32 | 1 | 3.91746868 | 0.09959623  | -5.297686796 | Down | 1.25E-10 | 2.66E-10 | AAEL001801-PA OS=Aedes aegypti GN=AAEL001801 PE=4 SV=1                                       |
| CCG024678.1 | 1611 | 64 | 2 | 1.70705339 | 0.043399475 | -5.297686796 | Down | 3.24E-20 | 1.27E-19 | AAEL013415-PA OS=Aedes aegypti GN=AAEL013415 PE=4 SV=1                                       |
| CCG023995.1 | 207  | 31 | 1 | 6.43508103 | 0.168880564 | -5.251883107 | Down | 2.70E-10 | 5.68E-10 | AAEL005316-PA OS=Aedes aegypti GN=AAEL005316 PE=4 SV=1                                       |
| CCG012266.1 | 328  | 31 | 1 | 4.06116394 | 0.106580112 | -5.251883107 | Down | 2.70E-10 | 5.68E-10 | -                                                                                            |
| CCG008963.1 | 1212 | 59 | 2 | 2.09176101 | 0.057686925 | -5.180329846 | Down | 1.53E-18 | 5.87E-18 | AAEL009325-PA OS=Aedes aegypti GN=AAEL009325 PE=4 SV=1                                       |
| CCG028271.1 | 1088 | 29 | 1 | 1.145333   | 0.032130769 | -5.155667791 | Down | 1.26E-09 | 2.60E-09 | -                                                                                            |
| CCG016802.2 | 213  | 29 | 1 | 5.85033945 | 0.164123365 | -5.155667791 | Down | 1.26E-09 | 2.60E-09 | -                                                                                            |
| CCG023884.1 | 351  | 58 | 2 | 7.10041199 | 0.19919246  | -5.155667791 | Down | 3.29E-18 | 1.26E-17 | AAEL001801-PA OS=Aedes aegypti GN=AAEL001801 PE=4 SV=1                                       |
| CCG005043.1 | 294  | 56 | 2 | 8.18471136 | 0.237811407 | -5.105041718 | Down | 1.53E-17 | 5.83E-17 | AAEL007735-PA OS=Aedes aegypti GN=AAEL007735 PE=4 SV=1                                       |
| CCG006053.1 | 513  | 27 | 1 | 2.26156498 | 0.068144789 | -5.052574298 | Down | 5.87E-09 | 1.18E-08 | AAEL014135-PA OS=Aedes aegypti GN=AAEL014135 PE=4 SV=1                                       |
| CCG020883.1 | 1857 | 27 | 1 | 0.62476189 | 0.018825136 | -5.052574298 | Down | 5.87E-09 | 1.18E-08 | AGAP013374-PA OS=Anopheles gambiae GN=AgaP_AGAP013374 PE=4 SV=1                              |
| CCG000149.1 | 690  | 27 | 1 | 1.6814244  | 0.050664169 | -5.052574298 | Down | 5.87E-09 | 1.18E-08 | AAEL014993-PA OS=Aedes aegypti GN=AAEL014993 PE=4 SV=1                                       |
| CCG024301.1 | 921  | 53 | 2 | 2.4727426  | 0.075913739 | -5.025607251 | Down | 1.53E-16 | 5.75E-16 | AAEL006841-PA OS=Aedes aegypti GN=AAEL006841 PE=4 SV=1                                       |
| CCG011467.1 | 528  | 26 | 1 | 2.1159339  | 0.066208858 | -4.998126514 | Down | 1.27E-08 | 2.52E-08 | Putative uncharacterized protein OS=Culex quinquefasciatus GN=CpipJ_CPIJ013074 PE=4 SV=1     |
| CCG014451.1 | 1728 | 26 | 1 | 0.64653536 | 0.020230484 | -4.998126514 | Down | 1.27E-08 | 2.52E-08 | AAEL009193-PA OS=Aedes aegypti GN=AAEL009193 PE=3 SV=1                                       |
| CCG020953.1 | 1376 | 26 | 1 | 0.81192813 | 0.025405724 | -4.998126514 | Down | 1.27E-08 | 2.52E-08 | Putative uncharacterized protein GLEAN_08496 OS=Tribolium castaneum GN=GLEAN_08496 PE=4 SV=1 |
| CCG020974.1 | 750  | 26 | 1 | 1.48961747 | 0.046611036 | -4.998126514 | Down | 1.27E-08 | 2.52E-08 | AAEL002919-PA OS=Aedes aegypti GN=AAEL002919 PE=4 SV=1                                       |

|             |      |    |   |            |             |              |      |          |          |                                                                         |
|-------------|------|----|---|------------|-------------|--------------|------|----------|----------|-------------------------------------------------------------------------|
| CCG009159.1 | 1215 | 51 | 2 | 1.80366787 | 0.057544489 | -4.970112138 | Down | 7.07E-16 | 2.58E-15 | Lipase OS=Aedes aegypti GN=AAEL012349 PE=3 SV=1                         |
| CCG001214.1 | 753  | 22 | 1 | 1.25542385 | 0.046425334 | -4.757118415 | Down | 2.69E-07 | 5.06E-07 | AAEL004996-PA OS=Aedes aegypti GN=AAEL004996 PE=3 SV=1                  |
| CCG013340.1 | 1509 | 22 | 1 | 0.62646399 | 0.023166519 | -4.757118415 | Down | 2.69E-07 | 5.06E-07 | AAEL005775-PA OS=Aedes aegypti GN=CYP325R1 PE=3 SV=1                    |
| CCG011063.1 | 1863 | 44 | 2 | 1.01485149 | 0.037529014 | -4.757118415 | Down | 1.47E-13 | 4.38E-13 | AAEL004003-PA OS=Aedes aegypti GN=AAEL004003 PE=3 SV=1                  |
| CCG020180.1 | 858  | 43 | 2 | 2.15349486 | 0.081487825 | -4.723951551 | Down | 3.14E-13 | 8.62E-13 | AAEL014579-PA OS=Aedes aegypti GN=AAEL014579 PE=3 SV=1                  |
| CCG003635.1 | 810  | 42 | 2 | 2.22806031 | 0.086316733 | -4.690004219 | Down | 6.69E-13 | 1.69E-12 | AAEL009485-PA OS=Aedes aegypti GN=AAEL009485 PE=4 SV=1                  |
| CCG027810.1 | 2544 | 42 | 2 | 0.709406   | 0.027482922 | -4.690004219 | Down | 6.69E-13 | 1.69E-12 | AAEL010958-PA OS=Aedes aegypti GN=AAEL010958 PE=4 SV=1                  |
| CCG020912.1 | 1863 | 40 | 2 | 0.92259226 | 0.037529014 | -4.619614891 | Down | 3.04E-12 | 7.12E-12 | AAEL004003-PA OS=Aedes aegypti GN=AAEL004003 PE=3 SV=1                  |
| CCG026197.1 | 561  | 37 | 2 | 2.83401102 | 0.124628438 | -4.507140162 | Down | 2.92E-11 | 6.34E-11 | AAEL014103-PA OS=Aedes aegypti GN=AAEL014103 PE=4 SV=1                  |
| CCG015404.1 | 579  | 18 | 1 | 1.33584667 | 0.060376989 | -4.467611798 | Down | 5.57E-06 | 9.89E-06 | AAEL004293-PA OS=Aedes aegypti GN=AAEL004293 PE=4 SV=1                  |
| CCG014958.1 | 510  | 18 | 1 | 1.51657887 | 0.068545641 | -4.467611798 | Down | 5.57E-06 | 9.89E-06 | -                                                                       |
| CCG022401.1 | 885  | 36 | 2 | 1.74792141 | 0.079001755 | -4.467611798 | Down | 6.18E-11 | 1.33E-10 | AAEL001045-PA OS=Aedes aegypti GN=AAEL001045 PE=4 SV=1                  |
| CCG027832.1 | 363  | 35 | 2 | 4.14308736 | 0.192607586 | -4.426969813 | Down | 1.31E-10 | 2.79E-10 | AAEL017144-PA OS=Aedes aegypti PE=4 SV=1                                |
| CCG028306.1 | 213  | 17 | 1 | 3.42950934 | 0.164123365 | -4.385149637 | Down | 1.18E-05 | 2.06E-05 | AAEL003475-PA OS=Aedes aegypti GN=AAEL003475 PE=3 SV=1                  |
| CCG001156.1 | 945  | 17 | 1 | 0.77300052 | 0.036992885 | -4.385149637 | Down | 1.18E-05 | 2.06E-05 | AAEL008205-PA OS=Aedes aegypti GN=AAEL008205 PE=4 SV=1                  |
| CCG007564.1 | 399  | 17 | 1 | 1.8307907  | 0.087614729 | -4.385149637 | Down | 1.18E-05 | 2.06E-05 | -                                                                       |
| CCG010945.1 | 849  | 34 | 2 | 1.72081387 | 0.082351653 | -4.385149637 | Down | 2.77E-10 | 5.82E-10 | Mariner Mos1 transposase OS=Acromyrmex echinatio GN=G5I_10332 PE=4 SV=1 |
| CCG001689.1 | 390  | 34 | 2 | 3.74607943 | 0.179273214 | -4.385149637 | Down | 2.77E-10 | 5.82E-10 | AAEL014975-PA OS=Aedes aegypti GN=AAEL014975 PE=4 SV=1                  |
| CCG008367.1 | 879  | 34 | 2 | 1.66208302 | 0.079541017 | -4.385149637 | Down | 2.77E-10 | 5.82E-10 | AAEL010413-PA OS=Aedes aegypti GN=AAEL010413 PE=4 SV=1                  |

|             |      |    |   |            |             |              |      |          |          |                                                                                                                 |
|-------------|------|----|---|------------|-------------|--------------|------|----------|----------|-----------------------------------------------------------------------------------------------------------------|
| CCG025476.1 | 1032 | 33 | 2 | 1.37403221 | 0.067748598 | -4.342080916 | Down | 5.84E-10 | 1.22E-09 | AAEL002915-PA OS=Aedes aegypti GN=AAEL002915 PE=4 SV=1                                                          |
| CCG017908.1 | 321  | 16 | 1 | 2.14179363 | 0.108904289 | -4.297686796 | Down | 2.50E-05 | 4.29E-05 | -                                                                                                               |
| CCG026455.1 | 1119 | 16 | 1 | 0.61440193 | 0.031240641 | -4.297686796 | Down | 2.50E-05 | 4.29E-05 | AAEL006817-PA OS=Aedes aegypti GN=AAEL006817 PE=4 SV=1                                                          |
| CCG017743.1 | 822  | 32 | 2 | 1.67278772 | 0.085056634 | -4.297686796 | Down | 1.23E-09 | 2.54E-09 | NADH dehydrogenase iron-sulfur protein 3, mitochondrial OS=Culex quinquefasciatus GN=CpipJ_CPIJ013503 PE=3 SV=1 |
| CCG018967.1 | 324  | 32 | 2 | 4.24392441 | 0.215791832 | -4.297686796 | Down | 1.23E-09 | 2.54E-09 | -                                                                                                               |
| CCG003832.1 | 600  | 31 | 2 | 2.22010296 | 0.116527589 | -4.251883107 | Down | 2.59E-09 | 5.29E-09 | AAEL009881-PA OS=Aedes aegypti GN=AAEL009881 PE=4 SV=1                                                          |
| CCG009217.1 | 510  | 31 | 2 | 2.61188583 | 0.137091281 | -4.251883107 | Down | 2.59E-09 | 5.29E-09 | -                                                                                                               |
| CCG021678.1 | 531  | 15 | 1 | 1.21383431 | 0.065834796 | -4.204577392 | Down | 5.28E-05 | 8.83E-05 | AAEL003069-PA OS=Aedes aegypti GN=AAEL003069 PE=4 SV=1                                                          |
| CCG005618.1 | 522  | 15 | 1 | 1.23476249 | 0.066969879 | -4.204577392 | Down | 5.28E-05 | 8.82E-05 | AAEL010040-PA OS=Aedes aegypti GN=AAEL010040 PE=4 SV=1                                                          |
| CCG016938.1 | 372  | 15 | 1 | 1.73265059 | 0.093973862 | -4.204577392 | Down | 5.28E-05 | 8.83E-05 | AAEL002191-PA OS=Aedes aegypti GN=AAEL002191 PE=4 SV=1                                                          |
| CCG017549.1 | 3555 | 15 | 1 | 0.1813069  | 0.009833552 | -4.204577392 | Down | 5.28E-05 | 8.83E-05 | Carboxypeptidase A1 OS=Culex quinquefasciatus GN=CpipJ_CPIJ007169 PE=3 SV=1                                     |
| CCG028567.1 | 300  | 15 | 1 | 2.14848673 | 0.116527589 | -4.204577392 | Down | 5.28E-05 | 8.83E-05 | AAEL005157-PA (Fragment) OS=Aedes aegypti GN=AAEL005157 PE=4 SV=1                                               |
| CCG003564.1 | 942  | 29 | 2 | 1.32284746 | 0.074221394 | -4.155667791 | Down | 1.14E-08 | 2.28E-08 | AAEL001318-PA OS=Aedes aegypti GN=AAEL001318 PE=4 SV=1                                                          |
| CCG028269.1 | 993  | 29 | 2 | 1.25490665 | 0.070409419 | -4.155667791 | Down | 1.14E-08 | 2.28E-08 | AAEL004705-PA OS=Aedes aegypti GN=AAEL004705 PE=4 SV=1                                                          |
| CCG014571.1 | 1056 | 14 | 1 | 0.56967451 | 0.033104429 | -4.105041718 | Down | 0.000111 | 0.000181 | AAEL005490-PA OS=Aedes aegypti GN=AAEL005490 PE=4 SV=1                                                          |
| CCG017208.1 | 1017 | 14 | 1 | 0.59152044 | 0.03437392  | -4.105041718 | Down | 0.000111 | 0.000181 | AAEL001491-PA OS=Aedes aegypti GN=AAEL001491 PE=4 SV=1                                                          |
| CCG023489.1 | 1569 | 28 | 2 | 0.76682764 | 0.04456122  | -4.105041718 | Down | 2.39E-08 | 4.71E-08 | AAEL000512-PA OS=Aedes aegypti GN=AAEL000512 PE=4 SV=1                                                          |
| CCG021308.1 | 558  | 13 | 1 | 1.00108701 | 0.062649242 | -3.998126514 | Down | 0.000233 | 0.000373 | AAEL001290-PA OS=Aedes aegypti GN=AAEL001290 PE=4 SV=1                                                          |

|             |      |    |   |            |             |              |      |          |          |                                                                                          |
|-------------|------|----|---|------------|-------------|--------------|------|----------|----------|------------------------------------------------------------------------------------------|
| CCG022613.1 | 384  | 13 | 1 | 1.45470456 | 0.091037179 | -3.998126514 | Down | 0.000233 | 0.000373 | AAEL002022-PA OS=Aedes aegypti GN=AAEL002022 PE=4 SV=1                                   |
| CCG002956.1 | 516  | 26 | 2 | 2.16514167 | 0.135497197 | -3.998126514 | Down | 1.04E-07 | 2.00E-07 | AAEL003442-PA OS=Aedes aegypti GN=AAEL003442 PE=4 SV=1                                   |
| CCG003292.1 | 537  | 26 | 2 | 2.08047132 | 0.130198424 | -3.998126514 | Down | 1.04E-07 | 2.00E-07 | Putative uncharacterized protein OS=Culex quinquefasciatus GN=CpipJ_CPIJ003408 PE=4 SV=1 |
| CCG023057.1 | 468  | 25 | 2 | 2.29539181 | 0.149394345 | -3.941542986 | Down | 2.17E-07 | 4.10E-07 | AAEL005222-PA OS=Aedes aegypti GN=AAEL005222 PE=4 SV=1                                   |
| CCG015281.1 | 423  | 25 | 2 | 2.53958242 | 0.165287361 | -3.941542986 | Down | 2.17E-07 | 4.10E-07 | -                                                                                        |
| CCG007790.1 | 309  | 25 | 2 | 3.47651575 | 0.226267164 | -3.941542986 | Down | 2.17E-07 | 4.10E-07 | -                                                                                        |
| CCG025834.1 | 471  | 12 | 1 | 1.09477031 | 0.074221394 | -3.882649297 | Down | 0.000487 | 0.000765 | AAEL002180-PA OS=Aedes aegypti GN=AAEL002180 PE=4 SV=1                                   |
| CCG012344.1 | 177  | 12 | 1 | 2.91320235 | 0.197504389 | -3.882649297 | Down | 0.000487 | 0.000765 | -                                                                                        |
| CCG022944.1 | 1077 | 12 | 1 | 0.47877142 | 0.032458939 | -3.882649297 | Down | 0.000487 | 0.000765 | Putative uncharacterized protein OS=Culex quinquefasciatus GN=CpipJ_CPIJ016112 PE=4 SV=1 |
| CCG013052.1 | 594  | 24 | 2 | 1.73615089 | 0.117704636 | -3.882649297 | Down | 4.50E-07 | 8.40E-07 | Putative uncharacterized protein OS=Culex quinquefasciatus GN=CpipJ_CPIJ002324 PE=4 SV=1 |
| CCG003508.1 | 543  | 23 | 2 | 1.82008084 | 0.128759767 | -3.821248752 | Down | 9.30E-07 | 1.72E-06 | AAEL001552-PA OS=Aedes aegypti GN=AAEL001552 PE=4 SV=1                                   |
| CCG004273.1 | 894  | 23 | 2 | 1.10548534 | 0.078206436 | -3.821248752 | Down | 9.30E-07 | 1.72E-06 | AAEL011014-PA OS=Aedes aegypti GN=AAEL011014 PE=4 SV=1                                   |
| CCG020914.1 | 1047 | 23 | 2 | 0.94393877 | 0.066777988 | -3.821248752 | Down | 9.30E-07 | 1.72E-06 | AAEL004031-PA OS=Aedes aegypti GN=AAEL004031 PE=4 SV=1                                   |
| CCG016035.1 | 438  | 22 | 2 | 2.15829717 | 0.159626835 | -3.757118415 | Down | 1.92E-06 | 3.49E-06 | Uncharacterized protein OS=Anopheles darlingi GN=AND_09803 PE=4 SV=1                     |
| CCG021766.1 | 426  | 22 | 2 | 2.21909428 | 0.164123365 | -3.757118415 | Down | 1.92E-06 | 3.49E-06 | -                                                                                        |
| CCG024431.1 | 2802 | 21 | 2 | 0.32204298 | 0.024952375 | -3.690004219 | Down | 3.95E-06 | 7.07E-06 | AAEL013366-PA (Fragment) OS=Aedes aegypti GN=AAEL013366 PE=4 SV=1                        |
| CCG022928.1 | 1017 | 21 | 2 | 0.88728066 | 0.06874784  | -3.690004219 | Down | 3.95E-06 | 7.07E-06 | AAEL001491-PA OS=Aedes aegypti GN=AAEL001491 PE=4 SV=1                                   |
| CCG012917.1 | 2907 | 20 | 2 | 0.29562941 | 0.024051102 | -3.619614891 | Down | 8.09E-06 | 1.43E-05 | Putative uncharacterized protein OS=Drosophila melanogaster GN=ORF1 PE=4 SV=1            |
| CCG007260.1 | 1479 | 20 | 2 | 0.5810647  | 0.047272856 | -3.619614891 | Down | 8.09E-06 | 1.43E-05 | AAEL011770-PA OS=Aedes aegypti GN=CYP325L1 PE=3 SV=1                                     |

|             |      |    |   |            |             |              |      |          |          |                                                                                          |
|-------------|------|----|---|------------|-------------|--------------|------|----------|----------|------------------------------------------------------------------------------------------|
| CCG019781.1 | 1077 | 20 | 2 | 0.79795236 | 0.064917877 | -3.619614891 | Down | 8.09E-06 | 1.43E-05 | Hypothetical conserved protein OS=Aedes aegypti PE=2 SV=1                                |
| CCG027804.1 | 1122 | 20 | 2 | 0.76594892 | 0.062314219 | -3.619614891 | Down | 8.09E-06 | 1.43E-05 | Leucine rich protein OS=Culex quinquefasciatus GN=CpipJ_CPIJ000810 PE=4 SV=1             |
| CCG010515.1 | 906  | 19 | 2 | 0.9011313  | 0.077170589 | -3.54561431  | Down | 1.65E-05 | 2.85E-05 | AAEL009792-PA OS=Aedes aegypti GN=AAEL009792 PE=4 SV=1                                   |
| CCG018128.1 | 468  | 19 | 2 | 1.74449777 | 0.149394345 | -3.54561431  | Down | 1.65E-05 | 2.85E-05 | AAEL002383-PA OS=Aedes aegypti GN=AAEL002383 PE=4 SV=1                                   |
| CCG015679.1 | 423  | 19 | 2 | 1.93008264 | 0.165287361 | -3.54561431  | Down | 1.65E-05 | 2.85E-05 | AAEL008483-PA OS=Aedes aegypti GN=AAEL008483 PE=4 SV=1                                   |
| CCG005128.1 | 456  | 19 | 2 | 1.79040561 | 0.153325775 | -3.54561431  | Down | 1.65E-05 | 2.85E-05 | Putative uncharacterized protein OS=Aedes aegypti PE=4 SV=1                              |
| CCG007560.1 | 409  | 18 | 2 | 1.89108857 | 0.170945119 | -3.467611798 | Down | 3.36E-05 | 5.69E-05 | -                                                                                        |
| CCG017726.1 | 690  | 18 | 2 | 1.1209496  | 0.101328338 | -3.467611798 | Down | 3.36E-05 | 5.69E-05 | AAEL006280-PA OS=Aedes aegypti GN=AAEL006280 PE=2 SV=1                                   |
| CCG002655.1 | 405  | 18 | 2 | 1.90976598 | 0.172633466 | -3.467611798 | Down | 3.36E-05 | 5.69E-05 | AAEL009489-PA OS=Aedes aegypti GN=AAEL009489 PE=4 SV=1                                   |
| CCG014482.1 | 1130 | 17 | 2 | 0.64644734 | 0.061873056 | -3.385149637 | Down | 6.81E-05 | 0.000113 | Uncharacterized protein OS=Anopheles darlingi GN=AND_11211 PE=4 SV=1                     |
| CCG001130.1 | 513  | 17 | 2 | 1.42394832 | 0.136289578 | -3.385149637 | Down | 6.81E-05 | 0.000113 | Putative 67B2 family heat shock protein OS=Aedes albopictus PE=2 SV=1                    |
| CCG020294.1 | 363  | 17 | 2 | 2.01235672 | 0.192607586 | -3.385149637 | Down | 6.81E-05 | 0.000113 | AAEL017144-PA OS=Aedes aegypti PE=4 SV=1                                                 |
| CCG023862.1 | 465  | 16 | 2 | 1.4785285  | 0.15035818  | -3.297686796 | Down | 0.000137 | 0.000223 | -                                                                                        |
| CCG007278.1 | 433  | 16 | 2 | 1.5877962  | 0.161470101 | -3.297686796 | Down | 0.000137 | 0.000222 | Uncharacterized protein OS=Anopheles darlingi GN=AND_04255 PE=4 SV=1                     |
| CCG009296.1 | 2523 | 15 | 2 | 0.2554681  | 0.027711674 | -3.204577392 | Down | 0.000275 | 0.000439 | AGAP002803-PA OS=Anopheles gambiae GN=AgaP_AGAP002803 PE=4 SV=2                          |
| CCG005048.1 | 1058 | 15 | 2 | 0.60921174 | 0.066083699 | -3.204577392 | Down | 0.000275 | 0.000439 | Putative uncharacterized protein OS=Culex quinquefasciatus GN=CpipJ_CPIJ018804 PE=4 SV=1 |
| CCG008175.1 | 239  | 14 | 2 | 2.51705558 | 0.292537881 | -3.105041718 | Down | 0.000549 | 0.00086  | -                                                                                        |
| CCG028426.1 | 1281 | 14 | 2 | 0.46961459 | 0.054579667 | -3.105041718 | Down | 0.000549 | 0.00086  | Reverse transcriptase OS=Aedes aegypti GN=pol PE=4 SV=1                                  |
| CCG004223.1 | 777  | 14 | 2 | 0.77422945 | 0.089982694 | -3.105041718 | Down | 0.000549 | 0.00086  | AGAP003797-PA OS=Anopheles gambiae GN=AGAP003797 PE=4 SV=1                               |

|             |      |    |   |            |             |              |      |          |         |                                                                   |
|-------------|------|----|---|------------|-------------|--------------|------|----------|---------|-------------------------------------------------------------------|
| CCG012202.1 | 1365 | 14 | 2 | 0.44071523 | 0.051220918 | -3.105041718 | Down | 0.000549 | 0.00086 | AAEL014617-PA OS=Aedes aegypti GN=CYP9J28 PE=3 SV=1               |
| CCG016812.1 | 720  | 14 | 2 | 0.83552262 | 0.097106324 | -3.105041718 | Down | 0.000549 | 0.00086 | AAEL008660-PA (Fragment) OS=Aedes aegypti GN=AAEL008660 PE=4 SV=1 |
