# Supplementary material
Source: PubMed Central journal article supplement (PMC4640774)
Supplement: pnas.1516410112.sd027.pdf [file pnas.1516410112.sd027.pdf]

**Table S7.5. Full list of Biological Process Gene Ontology categories enriched in sex-biased genes (terms from the Function Ontology with p-value ≤ 1).**

| GOID       | Gene Ontology term    | Cluster frequency       | Genome frequency of use   | Corrected P-value | Genes annotated to the term                                                                                                                                                                                                                                                                                                                                                                                                                                                                                                                                                                                                                                                                                                                                                                                                                                                                                                                                                                                                                                                                                                                                                                                                                                                                                                                                                                                                                                                                      |
|------------|-----------------------|-------------------------|---------------------------|-------------------|--------------------------------------------------------------------------------------------------------------------------------------------------------------------------------------------------------------------------------------------------------------------------------------------------------------------------------------------------------------------------------------------------------------------------------------------------------------------------------------------------------------------------------------------------------------------------------------------------------------------------------------------------------------------------------------------------------------------------------------------------------------------------------------------------------------------------------------------------------------------------------------------------------------------------------------------------------------------------------------------------------------------------------------------------------------------------------------------------------------------------------------------------------------------------------------------------------------------------------------------------------------------------------------------------------------------------------------------------------------------------------------------------------------------------------------------------------------------------------------------------|
| GO:0016070 | RNA metabolic process | 291 of 4104 in the list | 409 of 8404 in the genome | 5.99E-18          | CCG023277.1,CCG014396.1,CCG019030.1,CCG010191.3,CCG006357.1,CCG009878.1,CCG010647.1,CCG016758.1,CCG024072.1,CCG026882.1,CCG012142.1,CCG018507.1,CCG020685.1,CCG016238.1,CCG026473.1,CCG001292.1,CCG023173.1,CCG002470.1,CCG020804.1,CCG001040.1,CCG019031.1,CCG014679.1,CCG019382.1,CCG015546.1,CCG018719.1,CCG010792.1,CCG004231.1,CCG023053.1,CCG027115.1,CCG020129.1,CCG023129.1,CCG028653.1,CCG028042.1,CCG009235.1,CCG020877.1,CCG014946.1,CCG006231.1,CCG020286.1,CCG002735.1,CCG006767.1,CCG019296.1,CCG022470.1,CCG014840.1,CCG015694.1,CCG006484.1,CCG001461.1,CCG023686.1,CCG010510.1,CCG003938.1,CCG008401.1,CCG018902.1,CCG003755.1,CCG004927.1,CCG009805.2,CCG019545.1,CCG003142.1,CCG019330.1,CCG011060.1,CCG001876.1,CCG018402.1,CCG024200.1,CCG023125.1,CCG010624.1,CCG016381.1,CCG015894.1,CCG026612.1,CCG004926.1,CCG010912.1,CCG004955.1,CCG015367.1,CCG005524.1,CCG007155.1,CCG024857.1,CCG026516.1,CCG018164.1,CCG004224.1,CCG011135.1,CCG028092.1,CCG000209.1,CCG016760.1,CCG021521.1,CCG001395.1,CCG016557.1,CCG023184.1,CCG003153.1,CCG000939.1,CCG021940.1,CCG013174.1,CCG027340.1,CCG022183.1,CCG018168.1,CCG017344.1,CCG018796.1,CCG025691.1,CCG027401.1,CCG014824.1,CCG018243.1,CCG027950.1,CCG024597.1,CCG012278.1,CCG001898.1,CCG016685.1,CCG026840.1,CCG010797.1,CCG004008.1,CCG010138.1,CCG024480.1,CCG008916.1,CCG004151.1,CCG009214.1,CCG012557.1,CCG017046.2,CCG021716.1,CCG012837.1,CCG002662.1,CCG021042.1,CCG008036.1,CCG007177.1,CCG003528.1,CCG025157.1, |

|            |                             |                        |                           |          |                                                                                                                                                                                                                                                                                                                                                                                                                                                                                                                                                                                                                                                                                                                                                                                                                                                                                                                                                                                                                                                  |
|------------|-----------------------------|------------------------|---------------------------|----------|--------------------------------------------------------------------------------------------------------------------------------------------------------------------------------------------------------------------------------------------------------------------------------------------------------------------------------------------------------------------------------------------------------------------------------------------------------------------------------------------------------------------------------------------------------------------------------------------------------------------------------------------------------------------------------------------------------------------------------------------------------------------------------------------------------------------------------------------------------------------------------------------------------------------------------------------------------------------------------------------------------------------------------------------------|
| GO:0033554 | cellular response to stress | 89 of 4104 in the list | 102 of 8404 in the genome | 2.66E-13 | CCG027300.1,CCG021045.1,CCG006606.1,CCG004744.1,CCG021759.1,CCG026841.1,CCG019574.1,CCG026106.1,CCG018745.1,CCG022772.1,CCG022628.1,CCG027501.1,CCG005110.1,CCG024570.2,CCG013625.1,CCG019488.1,CCG007693.1,CCG006284.1,CCG003658.1,CCG018321.1,CCG006133.1,CCG012315.1,CCG007758.1,CCG000213.1,CCG017444.1,CCG004593.1,CCG005594.1,CCG001808.2,CCG005395.1,CCG008816.1,CCG024804.1,CCG016094.1,CCG023474.1,CCG005481.1,CCG011328.1,CCG004515.1,CCG024792.1,CCG000777.1,CCG019692.1,CCG011015.1,CCG012803.2,CCG003863.1,CCG004233.1,CCG000776.1,CCG018799.1,CCG006734.1,CCG018472.1,CCG005070.1,CCG005241.1,CCG014548.1,CCG015980.1,CCG004804.1,CCG001083.1,CCG027133.1,CCG004438.1,CCG017906.1,CCG007765.1,CCG002366.1,CCG009962.1,CCG007063.1,CCG024073.1,CCG006220.1,CCG012140.1,CCG018744.1,CCG006919.1,CCG023155.1,CCG012164.1,CCG004402.1,CCG017910.1,CCG000929.1,CCG002364.1,CCG001769.1,CCG000490.1,CCG027040.1,CCG005379.2,CCG028027.1,CCG021747.1,CCG020439.2,CCG005284.1,CCG003940.1,CCG018211.1,CCG024289.1,CCG001009.1,CCG000834.1, |
|------------|-----------------------------|------------------------|---------------------------|----------|--------------------------------------------------------------------------------------------------------------------------------------------------------------------------------------------------------------------------------------------------------------------------------------------------------------------------------------------------------------------------------------------------------------------------------------------------------------------------------------------------------------------------------------------------------------------------------------------------------------------------------------------------------------------------------------------------------------------------------------------------------------------------------------------------------------------------------------------------------------------------------------------------------------------------------------------------------------------------------------------------------------------------------------------------|

|            |                                          |                        |                           |          |                                                                                                                                                                                                                                                                                                                                                                                                                                                                                                                                                                                                                                                                                                                                                                                                                                                                                                                                                                                                                                                  |
|------------|------------------------------------------|------------------------|---------------------------|----------|--------------------------------------------------------------------------------------------------------------------------------------------------------------------------------------------------------------------------------------------------------------------------------------------------------------------------------------------------------------------------------------------------------------------------------------------------------------------------------------------------------------------------------------------------------------------------------------------------------------------------------------------------------------------------------------------------------------------------------------------------------------------------------------------------------------------------------------------------------------------------------------------------------------------------------------------------------------------------------------------------------------------------------------------------|
| GO:0006974 | cellular response to DNA damage stimulus | 87 of 4104 in the list | 100 of 8404 in the genome | 8.70E-13 | CCG027300.1,CCG021045.1,CCG006606.1,CCG004744.1,CCG021759.1,CCG026841.1,CCG019574.1,CCG026106.1,CCG018745.1,CCG022772.1,CCG022628.1,CCG027501.1,CCG005110.1,CCG024570.2,CCG013625.1,CCG019488.1,CCG007693.1,CCG006284.1,CCG003658.1,CCG018321.1,CCG006133.1,CCG012315.1,CCG007758.1,CCG000213.1,CCG017444.1,CCG004593.1,CCG005594.1,CCG001808.2,CCG005395.1,CCG008816.1,CCG024804.1,CCG016094.1,CCG023474.1,CCG005481.1,CCG011328.1,CCG004515.1,CCG024792.1,CCG000777.1,CCG019692.1,CCG011015.1,CCG012803.2,CCG003863.1,CCG004233.1,CCG000776.1,CCG018799.1,CCG006734.1,CCG018472.1,CCG005070.1,CCG005241.1,CCG014548.1,CCG015980.1,CCG004804.1,CCG001083.1,CCG027133.1,CCG004438.1,CCG017906.1,CCG007765.1,CCG009962.1,CCG007063.1,CCG024073.1,CCG006220.1,CCG012140.1,CCG018744.1,CCG006919.1,CCG023155.1,CCG012164.1,CCG004402.1,CCG017910.1,CCG000929.1,CCG002364.1,CCG000490.1,CCG001769.1,CCG027040.1,CCG005379.2,CCG028027.1,CCG021747.1,CCG020439.2,CCG005284.1,CCG003940.1,CCG018211.1,CCG024289.1,CCG001009.1,CCG003518.3,CCG020156.1, |
|------------|------------------------------------------|------------------------|---------------------------|----------|--------------------------------------------------------------------------------------------------------------------------------------------------------------------------------------------------------------------------------------------------------------------------------------------------------------------------------------------------------------------------------------------------------------------------------------------------------------------------------------------------------------------------------------------------------------------------------------------------------------------------------------------------------------------------------------------------------------------------------------------------------------------------------------------------------------------------------------------------------------------------------------------------------------------------------------------------------------------------------------------------------------------------------------------------|

|            |            |                        |                          |          |                                                                                                                                                                                                                                                                                                                                                                                                                                                                                                                                                                                                                                                                                                                                                                                                                                                                                                                                                                                                  |
|------------|------------|------------------------|--------------------------|----------|--------------------------------------------------------------------------------------------------------------------------------------------------------------------------------------------------------------------------------------------------------------------------------------------------------------------------------------------------------------------------------------------------------------------------------------------------------------------------------------------------------------------------------------------------------------------------------------------------------------------------------------------------------------------------------------------------------------------------------------------------------------------------------------------------------------------------------------------------------------------------------------------------------------------------------------------------------------------------------------------------|
| GO:0006281 | DNA repair | 85 of 4104 in the list | 98 of 8404 in the genome | 2.81E-12 | CCG027300.1,CCG021045.1,CCG006606.1,CCG004744.1,CCG021759.1,CCG019574.1,CCG026106.1,CCG018745.1,CCG022772.1,CCG022628.1,CCG027501.1,CCG005110.1,CCG024570.2,CCG013625.1,CCG019488.1,CCG007693.1,CCG006284.1,CCG003658.1,CCG006133.1,CCG012315.1,CCG007758.1,CCG000213.1,CCG017444.1,CCG004593.1,CCG005594.1,CCG001808.2,CCG005395.1,CCG008816.1,CCG024804.1,CCG016094.1,CCG023474.1,CCG005481.1,CCG011328.1,CCG004515.1,CCG024792.1,CCG000777.1,CCG019692.1,CCG011015.1,CCG012803.2,CCG003863.1,CCG004233.1,CCG000776.1,CCG018799.1,CCG006734.1,CCG018472.1,CCG005070.1,CCG005241.1,CCG014548.1,CCG015980.1,CCG004804.1,CCG001083.1,CCG027133.1,CCG004438.1,CCG017906.1,CCG007765.1,CCG009962.1,CCG007063.1,CCG024073.1,CCG006220.1,CCG012140.1,CCG018744.1,CCG006919.1,CCG023155.1,CCG012164.1,CCG004402.1,CCG017910.1,CCG000929.1,CCG002364.1,CCG000490.1,CCG001769.1,CCG027040.1,CCG005379.2,CCG028027.1,CCG021747.1,CCG020439.2,CCG005284.1,CCG003940.1,CCG018211.1,CCG024289.1,CCG001009.1, |
|------------|------------|------------------------|--------------------------|----------|--------------------------------------------------------------------------------------------------------------------------------------------------------------------------------------------------------------------------------------------------------------------------------------------------------------------------------------------------------------------------------------------------------------------------------------------------------------------------------------------------------------------------------------------------------------------------------------------------------------------------------------------------------------------------------------------------------------------------------------------------------------------------------------------------------------------------------------------------------------------------------------------------------------------------------------------------------------------------------------------------|

|            |                |                         |                           |          |                                                                                                                                                                                                                                                                                                                                                                                                                                                                                                                                                                                                                                                                                                                                                                                                                                                                                                                                                                                                                                                                                                                                                                                                                                                                                                                                                                                                                                                                                                  |
|------------|----------------|-------------------------|---------------------------|----------|--------------------------------------------------------------------------------------------------------------------------------------------------------------------------------------------------------------------------------------------------------------------------------------------------------------------------------------------------------------------------------------------------------------------------------------------------------------------------------------------------------------------------------------------------------------------------------------------------------------------------------------------------------------------------------------------------------------------------------------------------------------------------------------------------------------------------------------------------------------------------------------------------------------------------------------------------------------------------------------------------------------------------------------------------------------------------------------------------------------------------------------------------------------------------------------------------------------------------------------------------------------------------------------------------------------------------------------------------------------------------------------------------------------------------------------------------------------------------------------------------|
| GO:0006396 | RNA processing | 134 of 4104 in the list | 175 of 8404 in the genome | 3.31E-11 | CCG023263.1,CCG006357.1,CCG023964.1,CCG016758.1,CCG004234.1,CCG024072.1,CCG012142.1,CCG004820.1,CCG020113.1,CCG016274.1,CCG020685.1,CCG007914.1,CCG019012.1,CCG023173.1,CCG017408.1,CCG020804.1,CCG000806.1,CCG014524.1,CCG001040.1,CCG018311.1,CCG007043.1,CCG019382.1,CCG028285.1,CCG018636.1,CCG015546.1,CCG010792.1,CCG004231.1,CCG023053.1,CCG005834.1,CCG002221.1,CCG027115.1,CCG001268.1,CCG023129.1,CCG013802.1,CCG028042.1,CCG009235.1,CCG020286.1,CCG002735.1,CCG000754.1,CCG002674.1,CCG024717.1,CCG024611.1,CCG000427.1,CCG001461.1,CCG023686.1,CCG001317.1,CCG024810.1,CCG005020.1,CCG003938.1,CCG010460.1,CCG004228.1,CCG018902.1,CCG023511.1,CCG004927.1,CCG014142.1,CCG018320.1,CCG018402.1,CCG010624.1,CCG025958.1,CCG000583.2,CCG009033.1,CCG025926.1,CCG015894.1,CCG026612.1,CCG006039.1,CCG014335.1,CCG004955.1,CCG026872.2,CCG010912.1,CCG025357.1,CCG005524.1,CCG006948.1,CCG027579.1,CCG024857.1,CCG026516.1,CCG020967.1,CCG003055.1,CCG007636.1,CCG005176.1,CCG014279.1,CCG023156.1,CCG016760.1,CCG001310.1,CCG001395.1,CCG008858.1,CCG003785.1,CCG000939.1,CCG003153.1,CCG028049.1,CCG022183.1,CCG002449.1,CCG014824.1,CCG005174.1,CCG019674.1,CCG027962.1,CCG012278.1,CCG006043.1,CCG007777.1,CCG001898.1,CCG022629.1,CCG016251.1,CCG017986.1,CCG016685.1,CCG026840.1,CCG007962.1,CCG010539.1,CCG004008.1,CCG023521.1,CCG024480.1,CCG008916.1,CCG018917.1,CCG019953.1,CCG009214.1,CCG012557.1,CCG004440.1,CCG012837.1,CCG021042.1,CCG005178.3,CCG008036.1,CCG000393.1, |
|------------|----------------|-------------------------|---------------------------|----------|--------------------------------------------------------------------------------------------------------------------------------------------------------------------------------------------------------------------------------------------------------------------------------------------------------------------------------------------------------------------------------------------------------------------------------------------------------------------------------------------------------------------------------------------------------------------------------------------------------------------------------------------------------------------------------------------------------------------------------------------------------------------------------------------------------------------------------------------------------------------------------------------------------------------------------------------------------------------------------------------------------------------------------------------------------------------------------------------------------------------------------------------------------------------------------------------------------------------------------------------------------------------------------------------------------------------------------------------------------------------------------------------------------------------------------------------------------------------------------------------------|

|            |                            |                         |                           |          |                                                                                                                                                                                                                                                                                                                                                                                                                                                                                                                                                                                                                                                                                                                                                                                                                                                                                                                                                                                                                                                                                                                                                                                                                                                                                                                                                                                                                                                                                                  |
|------------|----------------------------|-------------------------|---------------------------|----------|--------------------------------------------------------------------------------------------------------------------------------------------------------------------------------------------------------------------------------------------------------------------------------------------------------------------------------------------------------------------------------------------------------------------------------------------------------------------------------------------------------------------------------------------------------------------------------------------------------------------------------------------------------------------------------------------------------------------------------------------------------------------------------------------------------------------------------------------------------------------------------------------------------------------------------------------------------------------------------------------------------------------------------------------------------------------------------------------------------------------------------------------------------------------------------------------------------------------------------------------------------------------------------------------------------------------------------------------------------------------------------------------------------------------------------------------------------------------------------------------------|
| GO:0043412 | macromolecule modification | 374 of 4104 in the list | 590 of 8404 in the genome | 1.30E-10 | CCG023297.1,CCG018536.1,CCG027737.1,CCG004887.1,CCG009151.1,CCG021449.1,CCG002687.2,CCG016952.1,CCG010985.1,CCG026174.1,CCG024745.1,CCG028333.1,CCG004091.1,CCG025472.1,CCG001788.1,CCG018432.1,CCG017266.1,CCG028198.1,CCG016689.2,CCG021479.1,CCG003362.1,CCG026300.1,CCG023381.1,CCG019735.1,CCG015296.1,CCG012077.1,CCG008381.1,CCG021616.1,CCG013914.1,CCG019210.1,CCG013402.1,CCG008301.1,CCG010776.1,CCG020055.1,CCG017984.1,CCG019378.3,CCG024612.1,CCG027636.1,CCG028653.1,CCG026212.1,CCG004569.1,CCG024139.1,CCG014946.1,CCG008040.1,CCG002156.2,CCG011071.1,CCG013109.1,CCG009002.1,CCG011949.1,CCG013345.1,CCG013131.1,CCG006465.1,CCG004212.1,CCG003248.1,CCG020010.1,CCG016189.1,CCG011322.1,CCG018494.1,CCG012083.1,CCG001311.1,CCG023251.1,CCG016480.1,CCG004101.1,CCG022627.1,CCG007457.1,CCG023331.1,CCG012332.1,CCG025715.1,CCG009687.2,CCG008401.1,CCG017127.1,CCG002957.1,CCG011587.1,CCG003755.1,CCG000552.1,CCG022056.1,CCG003532.1,CCG008557.1,CCG015186.1,CCG016327.2,CCG018688.1,CCG004903.1,CCG023458.1,CCG027943.1,CCG017113.1,CCG011886.1,CCG016095.1,CCG003520.1,CCG006928.1,CCG016738.2,CCG003060.1,CCG017381.1,CCG025433.1,CCG003554.1,CCG007874.3,CCG020978.1,CCG007331.2,CCG008404.1,CCG018201.1,CCG022628.1,CCG007766.1,CCG004806.1,CCG021179.1,CCG001108.1,CCG022370.1,CCG004123.1,CCG005531.1,CCG009038.1,CCG025707.1,CCG020078.1,CCG020837.1,CCG016294.1,CCG007485.1,CCG016557.1,CCG001051.1,CCG019139.1,CCG021825.3,CCG022209.1,CCG024922.1,CCG027340.1, |
|------------|----------------------------|-------------------------|---------------------------|----------|--------------------------------------------------------------------------------------------------------------------------------------------------------------------------------------------------------------------------------------------------------------------------------------------------------------------------------------------------------------------------------------------------------------------------------------------------------------------------------------------------------------------------------------------------------------------------------------------------------------------------------------------------------------------------------------------------------------------------------------------------------------------------------------------------------------------------------------------------------------------------------------------------------------------------------------------------------------------------------------------------------------------------------------------------------------------------------------------------------------------------------------------------------------------------------------------------------------------------------------------------------------------------------------------------------------------------------------------------------------------------------------------------------------------------------------------------------------------------------------------------|

|            |                    |                         |                           |          |                                                                                                                                                                                                                                                                                                                                                                                                                                                                                                                                                                                                                                                                                                                                                                                                                                                                                                                                                                                                                                                                                                                                                                                                                                                                                                                                                                                                                                                                                                  |
|------------|--------------------|-------------------------|---------------------------|----------|--------------------------------------------------------------------------------------------------------------------------------------------------------------------------------------------------------------------------------------------------------------------------------------------------------------------------------------------------------------------------------------------------------------------------------------------------------------------------------------------------------------------------------------------------------------------------------------------------------------------------------------------------------------------------------------------------------------------------------------------------------------------------------------------------------------------------------------------------------------------------------------------------------------------------------------------------------------------------------------------------------------------------------------------------------------------------------------------------------------------------------------------------------------------------------------------------------------------------------------------------------------------------------------------------------------------------------------------------------------------------------------------------------------------------------------------------------------------------------------------------|
| GO:0006950 | response to stress | 133 of 4104 in the list | 182 of 8404 in the genome | 1.65E-08 | CCG027300.1,CCG006606.1,CCG023237.1,CCG004744.1,CCG019574.1,CCG026106.1,CCG018745.1,CCG005110.1,CCG013625.1,CCG019488.1,CCG003658.1,CCG015596.1,CCG018321.1,CCG016035.1,CCG007758.1,CCG000213.1,CCG003448.1,CCG004593.1,CCG025714.1,CCG005170.1,CCG005395.1,CCG017244.1,CCG016094.1,CCG023474.1,CCG011328.1,CCG004515.1,CCG024792.1,CCG000777.1,CCG004145.1,CCG019692.1,CCG012803.2,CCG027669.1,CCG003863.1,CCG015967.1,CCG004233.1,CCG000776.1,CCG018799.1,CCG018472.1,CCG004168.2,CCG015980.1,CCG004804.1,CCG027133.1,CCG001083.1,CCG002366.1,CCG024073.1,CCG006220.1,CCG004723.1,CCG012140.1,CCG005913.1,CCG009672.1,CCG006919.1,CCG023155.1,CCG011939.1,CCG004402.1,CCG022399.1,CCG027668.1,CCG002364.1,CCG011122.1,CCG001769.1,CCG005379.2,CCG017425.1,CCG005284.1,CCG024289.1,CCG023940.1,CCG000116.1,CCG000834.1,CCG020156.1,CCG000409.1,CCG015966.1,CCG009231.1,CCG021045.1,CCG021759.1,CCG026841.1,CCG022628.1,CCG022772.1,CCG025005.1,CCG025006.1,CCG024878.1,CCG027501.1,CCG024570.2,CCG007693.1,CCG027211.1,CCG015458.1,CCG006284.1,CCG006133.1,CCG006124.1,CCG012315.1,CCG005594.1,CCG017444.1,CCG008075.1,CCG001808.2,CCG008816.1,CCG024804.1,CCG005481.1,CCG002446.2,CCG011015.1,CCG008821.1,CCG021072.1,CCG006734.1,CCG005070.1,CCG005241.1,CCG014548.1,CCG012274.1,CCG004438.1,CCG017906.1,CCG007765.1,CCG012273.2,CCG003252.1,CCG009962.1,CCG007063.1,CCG018744.1,CCG024173.1,CCG012164.1,CCG017910.1,CCG004753.1,CCG000929.1,CCG000490.1,CCG021071.1,CCG027040.1,CCG028027.1, |
|------------|--------------------|-------------------------|---------------------------|----------|--------------------------------------------------------------------------------------------------------------------------------------------------------------------------------------------------------------------------------------------------------------------------------------------------------------------------------------------------------------------------------------------------------------------------------------------------------------------------------------------------------------------------------------------------------------------------------------------------------------------------------------------------------------------------------------------------------------------------------------------------------------------------------------------------------------------------------------------------------------------------------------------------------------------------------------------------------------------------------------------------------------------------------------------------------------------------------------------------------------------------------------------------------------------------------------------------------------------------------------------------------------------------------------------------------------------------------------------------------------------------------------------------------------------------------------------------------------------------------------------------|

|            |                                       |                         |                           |          |                                                                                                                                                                                                                                                                                                                                                                                                                                                                                                                                                                                                                                                                                                                                                                                                                                                                                                                                                                                                                                                                                                                                                                                                                                                                                                                                                                                                                                                                                                  |
|------------|---------------------------------------|-------------------------|---------------------------|----------|--------------------------------------------------------------------------------------------------------------------------------------------------------------------------------------------------------------------------------------------------------------------------------------------------------------------------------------------------------------------------------------------------------------------------------------------------------------------------------------------------------------------------------------------------------------------------------------------------------------------------------------------------------------------------------------------------------------------------------------------------------------------------------------------------------------------------------------------------------------------------------------------------------------------------------------------------------------------------------------------------------------------------------------------------------------------------------------------------------------------------------------------------------------------------------------------------------------------------------------------------------------------------------------------------------------------------------------------------------------------------------------------------------------------------------------------------------------------------------------------------|
| GO:0006464 | cellular protein modification process | 342 of 4104 in the list | 550 of 8404 in the genome | 5.84E-08 | CCG023297.1,CCG018536.1,CCG027737.1,CCG004887.1,CCG009151.1,CCG021449.1,CCG002687.2,CCG016952.1,CCG010985.1,CCG026174.1,CCG024745.1,CCG028333.1,CCG004091.1,CCG025472.1,CCG001788.1,CCG018432.1,CCG017266.1,CCG028198.1,CCG016689.2,CCG021479.1,CCG003362.1,CCG026300.1,CCG023381.1,CCG019735.1,CCG015296.1,CCG012077.1,CCG008381.1,CCG021616.1,CCG013914.1,CCG019210.1,CCG013402.1,CCG008301.1,CCG010776.1,CCG020055.1,CCG017984.1,CCG019378.3,CCG024612.1,CCG027636.1,CCG026212.1,CCG004569.1,CCG024139.1,CCG008040.1,CCG002156.2,CCG011071.1,CCG013109.1,CCG009002.1,CCG011949.1,CCG013345.1,CCG013131.1,CCG006465.1,CCG004212.1,CCG003248.1,CCG020010.1,CCG016189.1,CCG011322.1,CCG018494.1,CCG012083.1,CCG001311.1,CCG023251.1,CCG016480.1,CCG004101.1,CCG022627.1,CCG007457.1,CCG023331.1,CCG012332.1,CCG025715.1,CCG009687.2,CCG017127.1,CCG002957.1,CCG011587.1,CCG000552.1,CCG022056.1,CCG003532.1,CCG008557.1,CCG015186.1,CCG016327.2,CCG018688.1,CCG004903.1,CCG023458.1,CCG027943.1,CCG017113.1,CCG011886.1,CCG016095.1,CCG003520.1,CCG006928.1,CCG016738.2,CCG003060.1,CCG017381.1,CCG025433.1,CCG003554.1,CCG007874.3,CCG020978.1,CCG007331.2,CCG008404.1,CCG018201.1,CCG022628.1,CCG007766.1,CCG004806.1,CCG021179.1,CCG001108.1,CCG022370.1,CCG004123.1,CCG005531.1,CCG009038.1,CCG025707.1,CCG020078.1,CCG020837.1,CCG016294.1,CCG007485.1,CCG001051.1,CCG019139.1,CCG021825.3,CCG022209.1,CCG024922.1,CCG014839.1,CCG007600.1,CCG008307.1,CCG006804.1,CCG014579.1,CCG014798.2, |
|------------|---------------------------------------|-------------------------|---------------------------|----------|--------------------------------------------------------------------------------------------------------------------------------------------------------------------------------------------------------------------------------------------------------------------------------------------------------------------------------------------------------------------------------------------------------------------------------------------------------------------------------------------------------------------------------------------------------------------------------------------------------------------------------------------------------------------------------------------------------------------------------------------------------------------------------------------------------------------------------------------------------------------------------------------------------------------------------------------------------------------------------------------------------------------------------------------------------------------------------------------------------------------------------------------------------------------------------------------------------------------------------------------------------------------------------------------------------------------------------------------------------------------------------------------------------------------------------------------------------------------------------------------------|



|            |                              |                         |                           |          |                                                                                                                                                                                                                                                                                                                                                                                                                                                                                                                                                                                                                                                                                                                                                                                                                                                                                                                                                                                                                                                                                                                                                                                                                                                                                                                                                                                                                                                                                                  |
|------------|------------------------------|-------------------------|---------------------------|----------|--------------------------------------------------------------------------------------------------------------------------------------------------------------------------------------------------------------------------------------------------------------------------------------------------------------------------------------------------------------------------------------------------------------------------------------------------------------------------------------------------------------------------------------------------------------------------------------------------------------------------------------------------------------------------------------------------------------------------------------------------------------------------------------------------------------------------------------------------------------------------------------------------------------------------------------------------------------------------------------------------------------------------------------------------------------------------------------------------------------------------------------------------------------------------------------------------------------------------------------------------------------------------------------------------------------------------------------------------------------------------------------------------------------------------------------------------------------------------------------------------|
| GO:0036211 | protein modification process | 342 of 4104 in the list | 550 of 8404 in the genome | 5.84E-08 | CCG023297.1,CCG018536.1,CCG027737.1,CCG004887.1,CCG009151.1,CCG021449.1,CCG002687.2,CCG016952.1,CCG010985.1,CCG026174.1,CCG024745.1,CCG028333.1,CCG004091.1,CCG025472.1,CCG001788.1,CCG018432.1,CCG017266.1,CCG028198.1,CCG016689.2,CCG021479.1,CCG003362.1,CCG026300.1,CCG023381.1,CCG019735.1,CCG015296.1,CCG012077.1,CCG008381.1,CCG021616.1,CCG013914.1,CCG019210.1,CCG013402.1,CCG008301.1,CCG010776.1,CCG020055.1,CCG017984.1,CCG019378.3,CCG024612.1,CCG027636.1,CCG026212.1,CCG004569.1,CCG024139.1,CCG008040.1,CCG002156.2,CCG011071.1,CCG013109.1,CCG009002.1,CCG011949.1,CCG013345.1,CCG013131.1,CCG006465.1,CCG004212.1,CCG003248.1,CCG020010.1,CCG016189.1,CCG011322.1,CCG018494.1,CCG012083.1,CCG001311.1,CCG023251.1,CCG016480.1,CCG004101.1,CCG022627.1,CCG007457.1,CCG023331.1,CCG012332.1,CCG025715.1,CCG009687.2,CCG017127.1,CCG002957.1,CCG011587.1,CCG000552.1,CCG022056.1,CCG003532.1,CCG008557.1,CCG015186.1,CCG016327.2,CCG018688.1,CCG004903.1,CCG023458.1,CCG027943.1,CCG017113.1,CCG011886.1,CCG016095.1,CCG003520.1,CCG006928.1,CCG016738.2,CCG003060.1,CCG017381.1,CCG025433.1,CCG003554.1,CCG007874.3,CCG020978.1,CCG007331.2,CCG008404.1,CCG018201.1,CCG022628.1,CCG007766.1,CCG004806.1,CCG021179.1,CCG001108.1,CCG022370.1,CCG004123.1,CCG005531.1,CCG009038.1,CCG025707.1,CCG020078.1,CCG020837.1,CCG016294.1,CCG007485.1,CCG001051.1,CCG019139.1,CCG021825.3,CCG022209.1,CCG024922.1,CCG014839.1,CCG007600.1,CCG008307.1,CCG006804.1,CCG014579.1,CCG014798.2, |
|------------|------------------------------|-------------------------|---------------------------|----------|--------------------------------------------------------------------------------------------------------------------------------------------------------------------------------------------------------------------------------------------------------------------------------------------------------------------------------------------------------------------------------------------------------------------------------------------------------------------------------------------------------------------------------------------------------------------------------------------------------------------------------------------------------------------------------------------------------------------------------------------------------------------------------------------------------------------------------------------------------------------------------------------------------------------------------------------------------------------------------------------------------------------------------------------------------------------------------------------------------------------------------------------------------------------------------------------------------------------------------------------------------------------------------------------------------------------------------------------------------------------------------------------------------------------------------------------------------------------------------------------------|

|            |                         |                         |                           |          |                                                                                                                                                                                                                                                                                                                                                                                                                                                                                                                                                                                                                                                                                                                                                                                                                                                                                                                                                                                                                                                                                                                                                                                                                                                  |
|------------|-------------------------|-------------------------|---------------------------|----------|--------------------------------------------------------------------------------------------------------------------------------------------------------------------------------------------------------------------------------------------------------------------------------------------------------------------------------------------------------------------------------------------------------------------------------------------------------------------------------------------------------------------------------------------------------------------------------------------------------------------------------------------------------------------------------------------------------------------------------------------------------------------------------------------------------------------------------------------------------------------------------------------------------------------------------------------------------------------------------------------------------------------------------------------------------------------------------------------------------------------------------------------------------------------------------------------------------------------------------------------------|
| GO:0034660 | ncRNA metabolic process | 106 of 4104 in the list | 141 of 8404 in the genome | 1.19E-07 | CCG023263.1,CCG021774.1,CCG023277.1,CCG014396.1,CCG015367.1,CCG025357.1,CCG027579.1,CCG010191.3,CCG006357.1,CCG009878.1,CCG023964.1,CCG016758.1,CCG006188.1,CCG004234.1,CCG027352.3,CCG015950.3,CCG003055.1,CCG020113.1,CCG016274.1,CCG020685.1,CCG005176.1,CCG007636.1,CCG016238.1,CCG011135.1,CCG014279.1,CCG023156.1,CCG028092.1,CCG019012.1,CCG013727.1,CCG023173.1,CCG016760.1,CCG020804.1,CCG027607.1,CCG018311.1,CCG000939.1,CCG010321.1,CCG022183.1,CCG018636.1,CCG002792.1,CCG017344.1,CCG000138.1,CCG015577.3,CCG002449.1,CCG014824.1,CCG023053.1,CCG002221.1,CCG019674.1,CCG023129.1,CCG000414.1,CCG012278.1,CCG028653.1,CCG006043.1,CCG002018.1,CCG022629.1,CCG016251.1,CCG020877.1,CCG006231.1,CCG008321.1,CCG020286.1,CCG002735.1,CCG007962.1,CCG010539.1,CCG001811.1,CCG023521.1,CCG008916.1,CCG004949.1,CCG002674.1,CCG019953.1,CCG005204.1,CCG009214.1,CCG000540.1,CCG001317.1,CCG021716.1,CCG004440.1,CCG005020.1,CCG021820.1,CCG010460.1,CCG006570.1,CCG002662.1,CCG000352.1,CCG004228.1,CCG023315.1,CCG003528.1,CCG016652.1,CCG010541.1,CCG010565.1,CCG023511.1,CCG000655.1,CCG005097.1,CCG005849.1,CCG014142.1,CCG003296.1,CCG019545.1,CCG009393.1,CCG019330.1,CCG022269.1,CCG001876.1,CCG026725.1,CCG026570.1,CCG000583.2, |
|------------|-------------------------|-------------------------|---------------------------|----------|--------------------------------------------------------------------------------------------------------------------------------------------------------------------------------------------------------------------------------------------------------------------------------------------------------------------------------------------------------------------------------------------------------------------------------------------------------------------------------------------------------------------------------------------------------------------------------------------------------------------------------------------------------------------------------------------------------------------------------------------------------------------------------------------------------------------------------------------------------------------------------------------------------------------------------------------------------------------------------------------------------------------------------------------------------------------------------------------------------------------------------------------------------------------------------------------------------------------------------------------------|

|            |                              |                         |                           |          |                                                                                                                                                                                                                                                                                                                                                                                                                                                                                                                                                                                                                                                                                                                                                                                                                                                                                                                                                                                                                                                                                                                                                                                                                                                                                                                                                                                                                                                                                                  |
|------------|------------------------------|-------------------------|---------------------------|----------|--------------------------------------------------------------------------------------------------------------------------------------------------------------------------------------------------------------------------------------------------------------------------------------------------------------------------------------------------------------------------------------------------------------------------------------------------------------------------------------------------------------------------------------------------------------------------------------------------------------------------------------------------------------------------------------------------------------------------------------------------------------------------------------------------------------------------------------------------------------------------------------------------------------------------------------------------------------------------------------------------------------------------------------------------------------------------------------------------------------------------------------------------------------------------------------------------------------------------------------------------------------------------------------------------------------------------------------------------------------------------------------------------------------------------------------------------------------------------------------------------|
| GO:0006793 | phosphorus metabolic process | 444 of 4104 in the list | 750 of 8404 in the genome | 1.72E-06 | CCG017420.1,CCG023297.1,CCG027737.1,CCG004887.1,CCG002687.2,CCG019020.1,CCG016952.1,CCG012875.1,CCG020879.1,CCG010985.1,CCG026174.1,CCG024745.1,CCG000970.1,CCG011006.1,CCG027119.1,CCG012558.1,CCG001788.1,CCG024297.1,CCG017266.1,CCG028198.1,CCG016689.2,CCG021479.1,CCG003362.1,CCG026300.1,CCG025307.1,CCG023381.1,CCG019735.1,CCG007993.1,CCG015296.1,CCG016370.1,CCG016653.1,CCG011237.1,CCG008381.1,CCG021616.1,CCG013216.1,CCG013402.1,CCG021110.1,CCG010776.1,CCG020055.1,CCG017984.1,CCG019378.3,CCG024612.1,CCG027636.1,CCG026212.1,CCG004569.1,CCG024139.1,CCG008040.1,CCG002156.2,CCG009002.1,CCG011949.1,CCG013345.1,CCG013131.1,CCG006465.1,CCG004212.1,CCG003248.1,CCG020010.1,CCG011322.1,CCG018113.1,CCG025396.1,CCG018494.1,CCG028131.1,CCG026953.1,CCG001311.1,CCG023251.1,CCG004101.1,CCG022627.1,CCG024432.2,CCG002675.1,CCG019678.1,CCG007457.1,CCG023331.1,CCG013641.1,CCG012332.1,CCG025715.1,CCG003495.1,CCG009687.2,CCG017127.1,CCG002957.1,CCG003683.2,CCG011587.1,CCG025131.2,CCG000552.1,CCG023452.1,CCG014116.1,CCG002852.1,CCG024903.1,CCG013610.1,CCG015186.1,CCG009518.1,CCG016327.2,CCG018688.1,CCG014228.2,CCG007362.1,CCG004903.1,CCG023458.1,CCG026865.1,CCG027943.1,CCG017113.1,CCG011886.1,CCG016095.1,CCG003520.1,CCG001285.1,CCG006928.1,CCG004532.1,CCG016738.2,CCG000789.1,CCG025433.1,CCG003554.1,CCG007874.3,CCG026047.1,CCG020978.1,CCG010014.1,CCG008404.1,CCG018201.1,CCG006529.1,CCG022628.1,CCG004806.1,CCG008287.1,CCG021179.1,CCG001108.1, |
|------------|------------------------------|-------------------------|---------------------------|----------|--------------------------------------------------------------------------------------------------------------------------------------------------------------------------------------------------------------------------------------------------------------------------------------------------------------------------------------------------------------------------------------------------------------------------------------------------------------------------------------------------------------------------------------------------------------------------------------------------------------------------------------------------------------------------------------------------------------------------------------------------------------------------------------------------------------------------------------------------------------------------------------------------------------------------------------------------------------------------------------------------------------------------------------------------------------------------------------------------------------------------------------------------------------------------------------------------------------------------------------------------------------------------------------------------------------------------------------------------------------------------------------------------------------------------------------------------------------------------------------------------|

|            |                                                 |                         |                           |          |                                                                                                                                                                                                                                                                                                                                                                                                                                                                                                                                                                                                                                                                                                                                                                                                                                                                                                                                                                                                                                                                                                                                                                                                                                                                                                                                                                                                                                                                                                                                                                                                                      |
|------------|-------------------------------------------------|-------------------------|---------------------------|----------|----------------------------------------------------------------------------------------------------------------------------------------------------------------------------------------------------------------------------------------------------------------------------------------------------------------------------------------------------------------------------------------------------------------------------------------------------------------------------------------------------------------------------------------------------------------------------------------------------------------------------------------------------------------------------------------------------------------------------------------------------------------------------------------------------------------------------------------------------------------------------------------------------------------------------------------------------------------------------------------------------------------------------------------------------------------------------------------------------------------------------------------------------------------------------------------------------------------------------------------------------------------------------------------------------------------------------------------------------------------------------------------------------------------------------------------------------------------------------------------------------------------------------------------------------------------------------------------------------------------------|
| GO:0006796 | phosphate-containing compound metabolic process | 441 of 4104 in the list | 747 of 8404 in the genome | 3.30E-06 | CCG017420.1,CCG023297.1,CCG027737.1,CCG004887.1,<br>CCG002687.2,CCG019020.1,CCG016952.1,CCG012875.1,<br>CCG020879.1,CCG010985.1,CCG026174.1,CCG024745.1,<br>CCG000970.1,CCG011006.1,CCG027119.1,CCG012558.1,<br>CCG001788.1,CCG024297.1,CCG017266.1,CCG028198.1,<br>CCG016689.2,CCG021479.1,CCG003362.1,CCG026300.1,<br>CCG025307.1,CCG023381.1,CCG019735.1,CCG007993.1,<br>CCG015296.1,CCG016370.1,CCG016653.1,CCG011237.1,<br>CCG008381.1,CCG021616.1,CCG013402.1,CCG021110.1,<br>CCG010776.1,CCG020055.1,CCG017984.1,CCG019378.3,<br>CCG024612.1,CCG027636.1,CCG026212.1,CCG004569.1,<br>CCG024139.1,CCG008040.1,CCG002156.2,CCG009002.1,<br>CCG011949.1,CCG013345.1,CCG013131.1,CCG006465.1,<br>CCG004212.1,CCG003248.1,CCG020010.1,CCG011322.1,<br>CCG025396.1,CCG018494.1,CCG028131.1,CCG026953.1,<br>CCG001311.1,CCG023251.1,CCG004101.1,CCG022627.1,<br>CCG024432.2,CCG002675.1,CCG019678.1,CCG007457.1,<br>CCG023331.1,CCG013641.1,CCG012332.1,CCG025715.1,<br>CCG003495.1,CCG009687.2,CCG017127.1,CCG002957.1,<br>CCG011587.1,CCG025131.2,CCG000552.1,CCG023452.1,<br>CCG014116.1,CCG002852.1,CCG024903.1,CCG013610.1,<br>CCG015186.1,CCG009518.1,CCG016327.2,CCG018688.1,<br>CCG014228.2,CCG007362.1,CCG004903.1,CCG023458.1,<br>CCG026865.1,CCG027943.1,CCG017113.1,CCG011886.1,<br>CCG016095.1,CCG003520.1,CCG001285.1,CCG006928.1,<br>CCG004532.1,CCG016738.2,CCG000789.1,CCG025433.1,<br>CCG003554.1,CCG007874.3,CCG026047.1,CCG020978.1,<br>CCG010014.1,CCG008404.1,CCG018201.1,CCG006529.1,<br>CCG022628.1,CCG004806.1,CCG008287.1,CCG021179.1,<br>CCG001108.1,CCG007533.1,CCG008422.1,CCG004123.1, |
|------------|-------------------------------------------------|-------------------------|---------------------------|----------|----------------------------------------------------------------------------------------------------------------------------------------------------------------------------------------------------------------------------------------------------------------------------------------------------------------------------------------------------------------------------------------------------------------------------------------------------------------------------------------------------------------------------------------------------------------------------------------------------------------------------------------------------------------------------------------------------------------------------------------------------------------------------------------------------------------------------------------------------------------------------------------------------------------------------------------------------------------------------------------------------------------------------------------------------------------------------------------------------------------------------------------------------------------------------------------------------------------------------------------------------------------------------------------------------------------------------------------------------------------------------------------------------------------------------------------------------------------------------------------------------------------------------------------------------------------------------------------------------------------------|

|            |                  |                        |                          |          |                                                                                                                                                                                                                                                                                                                                                                                                                                                                                                                                                                                                                                                                                                 |
|------------|------------------|------------------------|--------------------------|----------|-------------------------------------------------------------------------------------------------------------------------------------------------------------------------------------------------------------------------------------------------------------------------------------------------------------------------------------------------------------------------------------------------------------------------------------------------------------------------------------------------------------------------------------------------------------------------------------------------------------------------------------------------------------------------------------------------|
| GO:0034470 | ncRNA processing | 56 of 4104 in the list | 68 of 8404 in the genome | 1.04E-05 | CCG016251.1,CCG023263.1,CCG020286.1,CCG025357.1,CCG002735.1,CCG027579.1,CCG010539.1,CCG007962.1,CCG006357.1,CCG023521.1,CCG008916.1,CCG023964.1,CCG016758.1,CCG004234.1,CCG002674.1,CCG019953.1,CCG009214.1,CCG003055.1,CCG020113.1,CCG016274.1,CCG005176.1,CCG007636.1,CCG014279.1,CCG023156.1,CCG019012.1,CCG023173.1,CCG001317.1,CCG004440.1,CCG016760.1,CCG005020.1,CCG010460.1,CCG020804.1,CCG004228.1,CCG018311.1,CCG000939.1,CCG022183.1,CCG018636.1,CCG010541.1,CCG023511.1,CCG002449.1,CCG000655.1,CCG005097.1,CCG005849.1,CCG014142.1,CCG014824.1,CCG009393.1,CCG023053.1,CCG026725.1,CCG002221.1,CCG000583.2,CCG027125.1,CCG023129.1,CCG018474.1,CCG012278.1,CCG006043.1,CCG022629.1 |
|------------|------------------|------------------------|--------------------------|----------|-------------------------------------------------------------------------------------------------------------------------------------------------------------------------------------------------------------------------------------------------------------------------------------------------------------------------------------------------------------------------------------------------------------------------------------------------------------------------------------------------------------------------------------------------------------------------------------------------------------------------------------------------------------------------------------------------|

|            |                                  |                          |                            |          |                                                                                                                                                                                                                                                                                                                                                                                                                                                                                                                                                                                                                                                                                                                                                                                                                                                                                                                                                                                                                                                                                                                                                                                                                                                                                                                                                                                                                                                                                                  |
|------------|----------------------------------|--------------------------|----------------------------|----------|--------------------------------------------------------------------------------------------------------------------------------------------------------------------------------------------------------------------------------------------------------------------------------------------------------------------------------------------------------------------------------------------------------------------------------------------------------------------------------------------------------------------------------------------------------------------------------------------------------------------------------------------------------------------------------------------------------------------------------------------------------------------------------------------------------------------------------------------------------------------------------------------------------------------------------------------------------------------------------------------------------------------------------------------------------------------------------------------------------------------------------------------------------------------------------------------------------------------------------------------------------------------------------------------------------------------------------------------------------------------------------------------------------------------------------------------------------------------------------------------------|
| GO:0044763 | single-organism cellular process | 1273 of 4104 in the list | 2370 of 8404 in the genome | 1.27E-05 | CCG005254.1,CCG017420.1,CCG014340.1,CCG005375.1,CCG014396.1,CCG026106.1,CCG021740.1,CCG005370.1,CCG001468.1,CCG004595.1,CCG012875.1,CCG025108.1,CCG026174.1,CCG022794.1,CCG003587.1,CCG026360.1,CCG018432.1,CCG017266.1,CCG016689.2,CCG014466.1,CCG017851.1,CCG009530.1,CCG020956.1,CCG017240.1,CCG015101.1,CCG016094.1,CCG023474.1,CCG027127.1,CCG022025.2,CCG005053.1,CCG011237.1,CCG018533.1,CCG000526.1,CCG022281.1,CCG018416.1,CCG013308.1,CCG023579.1,CCG021110.1,CCG026050.1,CCG024612.1,CCG009668.1,CCG004548.1,CCG024663.1,CCG021681.1,CCG012083.1,CCG026953.1,CCG010622.1,CCG024119.1,CCG019678.1,CCG023464.1,CCG018264.1,CCG001579.1,CCG013641.1,CCG016924.1,CCG000732.1,CCG003317.1,CCG005391.2,CCG007951.1,CCG018585.3,CCG007597.1,CCG016399.1,CCG005284.1,CCG024903.1,CCG013610.1,CCG009959.1,CCG001876.1,CCG002231.1,CCG016719.1,CCG000983.1,CCG009823.1,CCG002937.1,CCG000876.1,CCG024664.1,CCG004532.1,CCG000789.1,CCG017381.1,CCG005588.1,CCG016753.1,CCG011547.1,CCG011252.1,CCG007356.1,CCG009333.1,CCG008939.1,CCG015407.1,CCG010112.1,CCG028092.1,CCG006479.1,CCG020491.1,CCG014345.2,CCG019825.2,CCG024155.1,CCG019884.1,CCG021990.1,CCG005594.1,CCG008075.1,CCG012195.1,CCG010561.1,CCG011827.1,CCG006787.1,CCG022871.1,CCG020654.1,CCG002135.1,CCG019611.1,CCG006804.1,CCG007023.1,CCG009553.1,CCG024760.1,CCG024918.1,CCG023662.1,CCG011015.1,CCG007958.1,CCG023779.1,CCG016459.1,CCG012959.1,CCG006013.1,CCG017112.1,CCG024421.3,CCG016836.2,CCG025897.1,CCG019890.1, |
|------------|----------------------------------|--------------------------|----------------------------|----------|--------------------------------------------------------------------------------------------------------------------------------------------------------------------------------------------------------------------------------------------------------------------------------------------------------------------------------------------------------------------------------------------------------------------------------------------------------------------------------------------------------------------------------------------------------------------------------------------------------------------------------------------------------------------------------------------------------------------------------------------------------------------------------------------------------------------------------------------------------------------------------------------------------------------------------------------------------------------------------------------------------------------------------------------------------------------------------------------------------------------------------------------------------------------------------------------------------------------------------------------------------------------------------------------------------------------------------------------------------------------------------------------------------------------------------------------------------------------------------------------------|

|            |                        |                        |                           |          |                                                                                                                                                                                                                                                                                                                                                                                                                                                                                                                                                                                                                                                                                                                                                                                                                                                                                                                                                                                                  |
|------------|------------------------|------------------------|---------------------------|----------|--------------------------------------------------------------------------------------------------------------------------------------------------------------------------------------------------------------------------------------------------------------------------------------------------------------------------------------------------------------------------------------------------------------------------------------------------------------------------------------------------------------------------------------------------------------------------------------------------------------------------------------------------------------------------------------------------------------------------------------------------------------------------------------------------------------------------------------------------------------------------------------------------------------------------------------------------------------------------------------------------|
| GO:0006399 | tRNA metabolic process | 83 of 4104 in the list | 112 of 8404 in the genome | 3.98E-05 | CCG021774.1,CCG023277.1,CCG014396.1,CCG015367.1,CCG025357.1,CCG010191.3,CCG009878.1,CCG023964.1,CCG016758.1,CCG006188.1,CCG004234.1,CCG027352.3,CCG015950.3,CCG020113.1,CCG007636.1,CCG016238.1,CCG014279.1,CCG011135.1,CCG023156.1,CCG028092.1,CCG013727.1,CCG019012.1,CCG023173.1,CCG020804.1,CCG027607.1,CCG018311.1,CCG000939.1,CCG010321.1,CCG022183.1,CCG017344.1,CCG000138.1,CCG015577.3,CCG002449.1,CCG014824.1,CCG002221.1,CCG023129.1,CCG000414.1,CCG012278.1,CCG006043.1,CCG002018.1,CCG016251.1,CCG020877.1,CCG008321.1,CCG006231.1,CCG020286.1,CCG010539.1,CCG001811.1,CCG023521.1,CCG008916.1,CCG004949.1,CCG002674.1,CCG005204.1,CCG001317.1,CCG021716.1,CCG004440.1,CCG005020.1,CCG021820.1,CCG010460.1,CCG006570.1,CCG002662.1,CCG000352.1,CCG004228.1,CCG023315.1,CCG003528.1,CCG010541.1,CCG010565.1,CCG023511.1,CCG000655.1,CCG014142.1,CCG003296.1,CCG019545.1,CCG009393.1,CCG019330.1,CCG001876.1,CCG022269.1,CCG026725.1,CCG026570.1,CCG000583.2,CCG027125.1,CCG008789.1, |
|------------|------------------------|------------------------|---------------------------|----------|--------------------------------------------------------------------------------------------------------------------------------------------------------------------------------------------------------------------------------------------------------------------------------------------------------------------------------------------------------------------------------------------------------------------------------------------------------------------------------------------------------------------------------------------------------------------------------------------------------------------------------------------------------------------------------------------------------------------------------------------------------------------------------------------------------------------------------------------------------------------------------------------------------------------------------------------------------------------------------------------------|

|            |                                   |                         |                            |          |                                                                                                                                                                                                                                                                                                                                                                                                                                                                                                                                                                                                                                                                                                                                                                                                                                                                                                                                                                                                                                                                                                                                                                                                                                                                                                                                                                                                                                                                                                                                                                                                                      |
|------------|-----------------------------------|-------------------------|----------------------------|----------|----------------------------------------------------------------------------------------------------------------------------------------------------------------------------------------------------------------------------------------------------------------------------------------------------------------------------------------------------------------------------------------------------------------------------------------------------------------------------------------------------------------------------------------------------------------------------------------------------------------------------------------------------------------------------------------------------------------------------------------------------------------------------------------------------------------------------------------------------------------------------------------------------------------------------------------------------------------------------------------------------------------------------------------------------------------------------------------------------------------------------------------------------------------------------------------------------------------------------------------------------------------------------------------------------------------------------------------------------------------------------------------------------------------------------------------------------------------------------------------------------------------------------------------------------------------------------------------------------------------------|
| GO:0044710 | single-organism metabolic process | 973 of 4104 in the list | 1786 of 8404 in the genome | 4.72E-05 | CCG012202.1,CCG017420.1,CCG027300.1,CCG014396.1,<br>CCG000184.1,CCG008603.1,CCG026106.1,CCG015926.1,<br>CCG028623.1,CCG009878.1,CCG019182.1,CCG020913.1,<br>CCG004595.1,CCG012875.1,CCG024517.1,CCG025108.1,<br>CCG009904.1,CCG026174.1,CCG013625.1,CCG016238.1,<br>CCG016220.1,CCG010284.1,CCG013059.1,CCG025836.1,<br>CCG025472.1,CCG012949.1,CCG024297.1,CCG018432.1,<br>CCG012578.1,CCG007424.2,CCG009496.1,CCG011763.1,<br>CCG005616.1,CCG010038.1,CCG025307.1,CCG020956.1,<br>CCG016370.1,CCG025346.1,CCG017624.1,CCG016094.1,<br>CCG023474.1,CCG017255.1,CCG000948.1,CCG022025.2,<br>CCG005053.1,CCG011237.1,CCG024123.2,CCG000944.1,<br>CCG007420.1,CCG011722.1,CCG021110.1,CCG010246.1,<br>CCG003063.1,CCG017651.1,CCG024612.1,CCG015450.1,<br>CCG018253.1,CCG020660.1,CCG027133.1,CCG018625.1,<br>CCG011231.2,CCG025396.1,CCG012083.1,CCG013816.1,<br>CCG026953.1,CCG023451.1,CCG005913.1,CCG024119.1,<br>CCG018290.1,CCG012339.1,CCG004402.1,CCG019678.1,<br>CCG018257.1,CCG022399.1,CCG017982.1,CCG011895.1,<br>CCG013641.1,CCG006821.1,CCG002113.1,CCG003495.1,<br>CCG009662.1,CCG013318.1,CCG022214.1,CCG011891.1,<br>CCG012840.1,CCG000775.1,CCG025131.2,CCG005284.1,<br>CCG000552.1,CCG023452.1,CCG002852.1,CCG024903.1,<br>CCG019545.1,CCG013610.1,CCG001876.1,CCG009518.1,<br>CCG002231.1,CCG008902.1,CCG000834.1,CCG026865.1,<br>CCG025096.1,CCG025015.2,CCG008388.1,CCG001285.1,<br>CCG004532.1,CCG000789.1,CCG019844.1,CCG017381.1,<br>CCG026016.1,CCG005588.1,CCG015367.1,CCG026047.1,<br>CCG011547.1,CCG005162.1,CCG015537.1,CCG008437.1,<br>CCG011491.1,CCG022772.1,CCG009333.1,CCG012619.1, |
|------------|-----------------------------------|-------------------------|----------------------------|----------|----------------------------------------------------------------------------------------------------------------------------------------------------------------------------------------------------------------------------------------------------------------------------------------------------------------------------------------------------------------------------------------------------------------------------------------------------------------------------------------------------------------------------------------------------------------------------------------------------------------------------------------------------------------------------------------------------------------------------------------------------------------------------------------------------------------------------------------------------------------------------------------------------------------------------------------------------------------------------------------------------------------------------------------------------------------------------------------------------------------------------------------------------------------------------------------------------------------------------------------------------------------------------------------------------------------------------------------------------------------------------------------------------------------------------------------------------------------------------------------------------------------------------------------------------------------------------------------------------------------------|



|            |                                                |                        |                          |         |                                                                                                                                                                                                                                                                                                                                                                                                                                                                                                                                                                                                                                                 |
|------------|------------------------------------------------|------------------------|--------------------------|---------|-------------------------------------------------------------------------------------------------------------------------------------------------------------------------------------------------------------------------------------------------------------------------------------------------------------------------------------------------------------------------------------------------------------------------------------------------------------------------------------------------------------------------------------------------------------------------------------------------------------------------------------------------|
| GO:0008033 | tRNA processing                                | 39 of 4104 in the list | 46 of 8404 in the genome | 0.00043 | CCG016251.1,CCG020286.1,CCG025357.1,CCG010539.1,CCG023521.1,CCG008916.1,CCG023964.1,CCG016758.1,CCG004234.1,CCG002674.1,CCG020113.1,CCG007636.1,CCG014279.1,CCG023156.1,CCG019012.1,CCG023173.1,CCG001317.1,CCG004440.1,CCG005020.1,CCG010460.1,CCG020804.1,CCG004228.1,CCG018311.1,CCG000939.1,CCG022183.1,CCG010541.1,CCG023511.1,CCG002449.1,CCG000655.1,CCG014142.1,CCG014824.1,CCG009393.1,CCG026725.1,CCG002221.1,CCG000583.2,CCG027125.1,CCG000122.1,CCG000212.1,CCG010072.1                                                                                                                                                             |
| GO:0006091 | generation of precursor metabolites and energy | 52 of 4104 in the list | 66 of 8404 in the genome | 0.00055 | CCG020616.1,CCG024798.1,CCG023685.1,CCG005588.1,CCG000102.1,CCG003215.3,CCG001649.1,CCG012727.1,CCG011547.1,CCG010373.1,CCG006864.1,CCG007981.1,CCG008130.1,CCG000431.1,CCG019953.1,CCG001842.1,CCG023350.1,CCG020879.1,CCG003220.2,CCG006203.1,CCG018614.1,CCG024119.1,CCG022453.1,CCG012249.1,CCG006459.1,CCG024297.1,CCG022035.1,CCG004155.2,CCG005677.1,CCG018684.1,CCG018128.1,CCG004244.1,CCG020956.1,CCG007023.1,CCG022214.1,CCG002790.1,CCG013339.1,CCG011237.1,CCG019712.1,CCG009771.2,CCG022430.1,CCG017200.1,CCG004760.1,CCG014053.1,CCG001072.1,CCG025277.1,CCG016431.1,CCG000089.1,CCG025015.2,CCG027621.1,CCG020707.1,CCG025162.2 |

|            |                  |                          |                            |         |                                                                                                                                                                                                                                                                                                                                                                                                                                                                                                                                                                                                                                                                                                                                                                                                                                                                                                                                                                                                                                                                                                                                                                                                                                                                                                                                                                                                                                                                                                                                                                                                                      |
|------------|------------------|--------------------------|----------------------------|---------|----------------------------------------------------------------------------------------------------------------------------------------------------------------------------------------------------------------------------------------------------------------------------------------------------------------------------------------------------------------------------------------------------------------------------------------------------------------------------------------------------------------------------------------------------------------------------------------------------------------------------------------------------------------------------------------------------------------------------------------------------------------------------------------------------------------------------------------------------------------------------------------------------------------------------------------------------------------------------------------------------------------------------------------------------------------------------------------------------------------------------------------------------------------------------------------------------------------------------------------------------------------------------------------------------------------------------------------------------------------------------------------------------------------------------------------------------------------------------------------------------------------------------------------------------------------------------------------------------------------------|
| GO:0009987 | cellular process | 2373 of 4104 in the list | 4632 of 8404 in the genome | 0.00067 | CCG005254.1,CCG014531.2,CCG017420.1,CCG027068.1,<br>CCG004973.1,CCG004887.1,CCG026106.1,CCG016952.1,<br>CCG012875.1,CCG025108.1,CCG004468.1,CCG023989.1,<br>CCG012726.1,CCG024584.1,CCG017266.1,CCG025208.1,<br>CCG021479.1,CCG003362.1,CCG023381.1,CCG019382.1,<br>CCG017851.1,CCG017240.1,CCG015101.1,CCG016094.1,<br>CCG026413.3,CCG023474.1,CCG026871.2,CCG010792.1,<br>CCG022025.2,CCG005053.1,CCG021616.1,CCG022281.1,<br>CCG010905.1,CCG008270.1,CCG021110.1,CCG026050.1,<br>CCG024612.1,CCG028653.1,CCG013109.1,CCG006465.1,<br>CCG019571.1,CCG015694.1,CCG021681.1,CCG018788.1,<br>CCG002982.1,CCG012083.1,CCG024119.1,CCG023686.1,<br>CCG001579.1,CCG013641.1,CCG015350.1,CCG007951.1,<br>CCG021948.1,CCG007597.1,CCG004927.1,CCG024903.1,<br>CCG021137.1,CCG022056.1,CCG013610.1,CCG001876.1,<br>CCG013465.1,CCG018688.1,CCG024200.1,CCG016719.1,<br>CCG000983.1,CCG023458.1,CCG002937.1,CCG000876.1,<br>CCG004926.1,CCG006928.1,CCG004532.1,CCG000789.1,<br>CCG017381.1,CCG010912.1,CCG016753.1,CCG001704.1,<br>CCG005524.1,CCG011547.1,CCG013640.1,CCG008404.1,<br>CCG010136.1,CCG022370.1,CCG010112.1,CCG022513.2,<br>CCG007750.2,CCG025707.1,CCG028092.1,CCG006479.1,<br>CCG014345.2,CCG019825.2,CCG001395.1,CCG024155.1,<br>CCG016557.1,CCG021990.1,CCG012195.1,CCG027000.1,<br>CCG011827.1,CCG006787.1,CCG020654.1,CCG006804.1,<br>CCG006264.1,CCG024760.1,CCG011015.1,CCG015167.1,<br>CCG014222.1,CCG012959.1,CCG000612.1,CCG006013.1,<br>CCG025897.1,CCG023983.1,CCG010046.1,CCG004308.1,<br>CCG002466.1,CCG001440.1,CCG017696.1,CCG006921.1,<br>CCG003775.1,CCG009928.1,CCG008152.1,CCG014982.1, |
|------------|------------------|--------------------------|----------------------------|---------|----------------------------------------------------------------------------------------------------------------------------------------------------------------------------------------------------------------------------------------------------------------------------------------------------------------------------------------------------------------------------------------------------------------------------------------------------------------------------------------------------------------------------------------------------------------------------------------------------------------------------------------------------------------------------------------------------------------------------------------------------------------------------------------------------------------------------------------------------------------------------------------------------------------------------------------------------------------------------------------------------------------------------------------------------------------------------------------------------------------------------------------------------------------------------------------------------------------------------------------------------------------------------------------------------------------------------------------------------------------------------------------------------------------------------------------------------------------------------------------------------------------------------------------------------------------------------------------------------------------------|

|            |                         |                         |                           |         |                                                                                                                                                                                                                                                                                                                                                                                                                                                                                                                                                                                                                                                                                                                                                                                                                                                                                                                                                                                                                                                                                                                                                                                                                                                                                                                                                                                                                                                                                                  |
|------------|-------------------------|-------------------------|---------------------------|---------|--------------------------------------------------------------------------------------------------------------------------------------------------------------------------------------------------------------------------------------------------------------------------------------------------------------------------------------------------------------------------------------------------------------------------------------------------------------------------------------------------------------------------------------------------------------------------------------------------------------------------------------------------------------------------------------------------------------------------------------------------------------------------------------------------------------------------------------------------------------------------------------------------------------------------------------------------------------------------------------------------------------------------------------------------------------------------------------------------------------------------------------------------------------------------------------------------------------------------------------------------------------------------------------------------------------------------------------------------------------------------------------------------------------------------------------------------------------------------------------------------|
| GO:0006468 | protein phosphorylation | 196 of 4104 in the list | 319 of 8404 in the genome | 0.00293 | CCG000757.1,CCG002799.1,CCG023297.1,CCG025284.1,CCG027737.1,CCG004887.1,CCG005421.1,CCG025148.1,CCG003589.1,CCG002236.1,CCG028602.1,CCG020372.1,CCG007183.1,CCG016952.1,CCG010985.1,CCG026174.1,CCG006244.2,CCG024745.1,CCG013616.1,CCG009699.2,CCG017266.1,CCG028198.1,CCG016689.2,CCG021479.1,CCG009508.1,CCG019420.2,CCG023381.1,CCG019735.1,CCG015296.1,CCG024301.1,CCG028451.1,CCG018341.1,CCG008919.1,CCG008381.1,CCG021616.1,CCG022599.1,CCG023108.1,CCG013402.1,CCG018202.1,CCG017672.1,CCG017984.1,CCG019378.3,CCG004698.1,CCG027636.1,CCG004569.1,CCG024139.1,CCG004782.1,CCG008040.1,CCG024840.1,CCG021507.1,CCG002226.1,CCG011562.1,CCG009002.1,CCG013345.1,CCG011949.1,CCG006465.1,CCG003248.1,CCG018139.1,CCG011322.1,CCG018494.1,CCG017765.1,CCG008098.1,CCG025614.1,CCG001311.1,CCG023251.1,CCG011482.1,CCG020473.1,CCG025250.1,CCG012974.1,CCG024960.1,CCG028197.1,CCG013826.1,CCG007457.1,CCG023331.1,CCG004397.1,CCG012332.1,CCG022834.1,CCG010096.1,CCG020326.1,CCG021881.1,CCG028497.1,CCG018960.1,CCG025715.1,CCG009687.2,CCG025054.1,CCG017127.1,CCG010943.1,CCG002957.1,CCG004215.1,CCG011587.1,CCG013403.1,CCG020636.1,CCG000440.1,CCG027239.1,CCG015186.1,CCG016327.2,CCG004903.1,CCG023458.1,CCG014005.1,CCG027943.1,CCG018477.1,CCG017113.1,CCG011886.1,CCG016095.1,CCG003520.1,CCG006928.1,CCG016738.2,CCG025433.1,CCG003554.1,CCG020978.1,CCG003498.1,CCG008404.1,CCG018201.1,CCG022628.1,CCG021179.1,CCG026494.1,CCG001108.1,CCG005360.1,CCG001043.1,CCG004123.1, |
|------------|-------------------------|-------------------------|---------------------------|---------|--------------------------------------------------------------------------------------------------------------------------------------------------------------------------------------------------------------------------------------------------------------------------------------------------------------------------------------------------------------------------------------------------------------------------------------------------------------------------------------------------------------------------------------------------------------------------------------------------------------------------------------------------------------------------------------------------------------------------------------------------------------------------------------------------------------------------------------------------------------------------------------------------------------------------------------------------------------------------------------------------------------------------------------------------------------------------------------------------------------------------------------------------------------------------------------------------------------------------------------------------------------------------------------------------------------------------------------------------------------------------------------------------------------------------------------------------------------------------------------------------|

|            |                            |                        |                          |         |                                                                                                                                                                                                                                                                                                                                                                                                                                                                                                                                                                                                                                                                                                                                                                                                                                                 |
|------------|----------------------------|------------------------|--------------------------|---------|-------------------------------------------------------------------------------------------------------------------------------------------------------------------------------------------------------------------------------------------------------------------------------------------------------------------------------------------------------------------------------------------------------------------------------------------------------------------------------------------------------------------------------------------------------------------------------------------------------------------------------------------------------------------------------------------------------------------------------------------------------------------------------------------------------------------------------------------------|
| GO:0007017 | microtubule-based process  | 71 of 4104 in the list | 99 of 8404 in the genome | 0.00306 | CCG015570.1,CCG006420.1,CCG013000.1,CCG026823.1,CCG023488.2,CCG003707.1,CCG010695.1,CCG005370.1,CCG009243.1,CCG019028.1,CCG023319.1,CCG001167.1,CCG002696.1,CCG025520.1,CCG001881.1,CCG027236.1,CCG025751.1,CCG006421.1,CCG023963.3,CCG005696.1,CCG011262.1,CCG008801.1,CCG024300.1,CCG000825.1,CCG016370.1,CCG000535.1,CCG022536.3,CCG010363.1,CCG007532.1,CCG008377.1,CCG007531.1,CCG018820.3,CCG010538.1,CCG024421.3,CCG008346.1,CCG026688.1,CCG015784.1,CCG014305.1,CCG013637.1,CCG023682.1,CCG012733.1,CCG017480.1,CCG019140.1,CCG010418.1,CCG009080.1,CCG027167.1,CCG025396.1,CCG019029.1,CCG021818.1,CCG001770.1,CCG010622.1,CCG021448.1,CCG010657.1,CCG008748.1,CCG009543.1,CCG016119.1,CCG015289.1,CCG021228.1,CCG005525.1,CCG019329.1,CCG005886.1,CCG003024.1,CCG002852.1,CCG010864.1,CCG006361.2,CCG021317.1,CCG017837.1,CCG021895.1 |
| GO:0042254 | ribosome biogenesis        | 39 of 4104 in the list | 48 of 8404 in the genome | 0.0038  | CCG023263.1,CCG014531.2,CCG020286.1,CCG018407.1,CCG002735.1,CCG027579.1,CCG005477.1,CCG007962.1,CCG006357.1,CCG019953.1,CCG009214.1,CCG003055.1,CCG016274.1,CCG000540.1,CCG005176.1,CCG007636.1,CCG002681.1,CCG016760.1,CCG018046.1,CCG007518.1,CCG016652.1,CCG018636.1,CCG002792.1,CCG023511.1,CCG008299.1,CCG015998.1,CCG005097.1,CCG005849.1,CCG014824.1,CCG004044.1,CCG011449.1,CCG023053.1,CCG023663.1,CCG022486.1,CCG002564.1,CCG018474.1,CCG000050.1,CCG011057.1,CCG000000.1                                                                                                                                                                                                                                                                                                                                                             |
| GO:0006289 | nucleotide-excision repair | 17 of 4104 in the list | 17 of 8404 in the genome | 0.00548 | CCG005241.1,CCG000213.1,CCG000929.1,CCG001808.2,CCG001769.1,CCG027133.1,CCG001083.1,CCG005395.1,CCG005379.2,CCG022772.1,CCG024804.1,CCG024792.1,CCG006284.1,CCG003658.1,CCG012164.1,CCG004402.1,                                                                                                                                                                                                                                                                                                                                                                                                                                                                                                                                                                                                                                                |

|            |                                      |                        |                          |         |                                                                                                                                                                                                                                                                                                                                                                                                                                                                                                 |
|------------|--------------------------------------|------------------------|--------------------------|---------|-------------------------------------------------------------------------------------------------------------------------------------------------------------------------------------------------------------------------------------------------------------------------------------------------------------------------------------------------------------------------------------------------------------------------------------------------------------------------------------------------|
| GO:0022613 | ribonucleoprotein complex biogenesis | 40 of 4104 in the list | 50 of 8404 in the genome | 0.00594 | CCG023263.1,CCG014531.2,CCG020286.1,CCG018407.1,CCG002735.1,CCG027579.1,CCG005477.1,CCG007962.1,CCG006357.1,CCG019953.1,CCG009214.1,CCG003055.1,CCG016274.1,CCG000540.1,CCG005176.1,CCG007636.1,CCG002681.1,CCG016760.1,CCG018046.1,CCG007518.1,CCG016652.1,CCG018636.1,CCG002792.1,CCG010792.1,CCG023511.1,CCG008299.1,CCG015998.1,CCG005097.1,CCG005849.1,CCG014824.1,CCG004044.1,CCG011449.1,CCG023053.1,CCG023663.1,CCG022486.1,CCG002564.1,CCG018171.1,CCG008850.1,CCG008888.1,CCG011857.1 |
|------------|--------------------------------------|------------------------|--------------------------|---------|-------------------------------------------------------------------------------------------------------------------------------------------------------------------------------------------------------------------------------------------------------------------------------------------------------------------------------------------------------------------------------------------------------------------------------------------------------------------------------------------------|

|            |                 |                         |                           |         |                                                                                                                                                                                                                                                                                                                                                                                                                                                                                                                                                                                                                                                                                                                                                                                                                                                                                                                                                                                                                                                                                                                                                                                                                                                                                                                                                                                                                                                                                                  |
|------------|-----------------|-------------------------|---------------------------|---------|--------------------------------------------------------------------------------------------------------------------------------------------------------------------------------------------------------------------------------------------------------------------------------------------------------------------------------------------------------------------------------------------------------------------------------------------------------------------------------------------------------------------------------------------------------------------------------------------------------------------------------------------------------------------------------------------------------------------------------------------------------------------------------------------------------------------------------------------------------------------------------------------------------------------------------------------------------------------------------------------------------------------------------------------------------------------------------------------------------------------------------------------------------------------------------------------------------------------------------------------------------------------------------------------------------------------------------------------------------------------------------------------------------------------------------------------------------------------------------------------------|
| GO:0016310 | phosphorylation | 219 of 4104 in the list | 365 of 8404 in the genome | 0.00854 | CCG000757.1,CCG023685.1,CCG002799.1,CCG023297.1,CCG019820.1,CCG025284.1,CCG027737.1,CCG004887.1,CCG006864.1,CCG005421.1,CCG025148.1,CCG003589.1,CCG002236.1,CCG028602.1,CCG020372.1,CCG007183.1,CCG016952.1,CCG020879.1,CCG010985.1,CCG026174.1,CCG006244.2,CCG024745.1,CCG013616.1,CCG009699.2,CCG024297.1,CCG010996.1,CCG017266.1,CCG028198.1,CCG016689.2,CCG021479.1,CCG009508.1,CCG019420.2,CCG023381.1,CCG019735.1,CCG015296.1,CCG024301.1,CCG028451.1,CCG018341.1,CCG008919.1,CCG011237.1,CCG008381.1,CCG021616.1,CCG022599.1,CCG023108.1,CCG013402.1,CCG018202.1,CCG021110.1,CCG017672.1,CCG017984.1,CCG019378.3,CCG004698.1,CCG027636.1,CCG004569.1,CCG024139.1,CCG004782.1,CCG008040.1,CCG024840.1,CCG021507.1,CCG002226.1,CCG023393.1,CCG011562.1,CCG009002.1,CCG011949.1,CCG013345.1,CCG006465.1,CCG003248.1,CCG018139.1,CCG011322.1,CCG018494.1,CCG017765.1,CCG008098.1,CCG025614.1,CCG001311.1,CCG023251.1,CCG011482.1,CCG020473.1,CCG025250.1,CCG012974.1,CCG024960.1,CCG028197.1,CCG013826.1,CCG007457.1,CCG023331.1,CCG004397.1,CCG012332.1,CCG022834.1,CCG010096.1,CCG020326.1,CCG021881.1,CCG028497.1,CCG018960.1,CCG025715.1,CCG009687.2,CCG025054.1,CCG017127.1,CCG010943.1,CCG002957.1,CCG004215.1,CCG011587.1,CCG013403.1,CCG020636.1,CCG000440.1,CCG027239.1,CCG024903.1,CCG015186.1,CCG016327.2,CCG004903.1,CCG023458.1,CCG014005.1,CCG027943.1,CCG018477.1,CCG017113.1,CCG011886.1,CCG016095.1,CCG003520.1,CCG006928.1,CCG000789.1,CCG016738.2,CCG025433.1,CCG003554.1, |
|------------|-----------------|-------------------------|---------------------------|---------|--------------------------------------------------------------------------------------------------------------------------------------------------------------------------------------------------------------------------------------------------------------------------------------------------------------------------------------------------------------------------------------------------------------------------------------------------------------------------------------------------------------------------------------------------------------------------------------------------------------------------------------------------------------------------------------------------------------------------------------------------------------------------------------------------------------------------------------------------------------------------------------------------------------------------------------------------------------------------------------------------------------------------------------------------------------------------------------------------------------------------------------------------------------------------------------------------------------------------------------------------------------------------------------------------------------------------------------------------------------------------------------------------------------------------------------------------------------------------------------------------|

|            |                                               |                         |                           |         |                                                                                                                                                                                                                                                                                                                                                                                                                                                                                                                                                                                                                                                                                                                                                                                                                                                                                                                                                                                                                                                                                                                                                                                                                                                                                                                                                                                                                                                                                                  |
|------------|-----------------------------------------------|-------------------------|---------------------------|---------|--------------------------------------------------------------------------------------------------------------------------------------------------------------------------------------------------------------------------------------------------------------------------------------------------------------------------------------------------------------------------------------------------------------------------------------------------------------------------------------------------------------------------------------------------------------------------------------------------------------------------------------------------------------------------------------------------------------------------------------------------------------------------------------------------------------------------------------------------------------------------------------------------------------------------------------------------------------------------------------------------------------------------------------------------------------------------------------------------------------------------------------------------------------------------------------------------------------------------------------------------------------------------------------------------------------------------------------------------------------------------------------------------------------------------------------------------------------------------------------------------|
| GO:0071840 | cellular component organization or biogenesis | 220 of 4104 in the list | 367 of 8404 in the genome | 0.00889 | CCG023263.1,CCG014531.2,CCG006420.1,CCG018832.1,CCG006211.1,CCG004973.1,CCG013000.1,CCG026823.1,CCG005477.1,CCG003361.1,CCG011675.1,CCG006357.1,CCG010647.1,CCG019356.1,CCG020949.1,CCG005370.1,CCG019028.1,CCG016274.1,CCG007941.1,CCG026473.1,CCG012476.1,CCG002696.1,CCG014817.2,CCG014537.1,CCG003587.1,CCG013028.1,CCG027236.1,CCG019217.1,CCG024028.1,CCG005194.1,CCG024623.1,CCG014836.1,CCG015767.2,CCG024177.1,CCG000614.1,CCG009641.1,CCG004481.1,CCG006686.1,CCG012514.1,CCG027196.1,CCG000575.1,CCG002099.1,CCG018636.1,CCG002792.1,CCG016370.1,CCG014318.1,CCG010792.1,CCG003485.1,CCG015998.1,CCG025893.1,CCG023053.1,CCG010905.1,CCG022456.1,CCG006714.1,CCG027899.1,CCG010538.1,CCG010909.1,CCG028653.1,CCG018647.1,CCG020286.1,CCG017580.1,CCG015784.1,CCG009980.1,CCG002735.1,CCG023682.1,CCG015968.1,CCG013509.1,CCG019140.1,CCG018893.1,CCG010649.1,CCG025877.1,CCG018767.1,CCG020987.1,CCG015560.1,CCG002366.1,CCG009080.1,CCG027198.1,CCG009089.1,CCG027167.1,CCG000469.1,CCG025396.1,CCG000587.1,CCG012083.1,CCG018326.1,CCG019029.1,CCG008559.1,CCG019082.1,CCG027696.1,CCG002681.1,CCG021448.1,CCG010650.1,CCG000708.1,CCG025990.1,CCG024624.1,CCG009543.1,CCG004494.1,CCG015289.1,CCG010908.1,CCG005716.1,CCG022673.1,CCG026159.1,CCG023511.1,CCG009582.1,CCG015398.1,CCG020442.1,CCG020806.1,CCG001810.1,CCG002852.1,CCG024787.1,CCG000915.1,CCG012584.1,CCG021366.1,CCG000834.1,CCG018859.3,CCG008302.1,CCG019092.1,CCG002564.1,CCG024788.1,CCG015570.1,CCG006899.1, |
| GO:0006261 | DNA-dependent DNA replication                 | 19 of 4104 in the list  | 20 of 8404 in the genome  | 0.01398 | CCG025352.1,CCG025208.1,CCG017380.1,CCG026841.1,CCG006549.1,CCG014280.1,CCG003904.1,CCG020651.1,CCG013917.1,CCG015694.1,CCG015711.1,CCG016381.1,CCG009896.1,CCG026258.1,CCG018321.1,CCG022735.1,CCG023633.1,CCG015599.1,CCG006164.1                                                                                                                                                                                                                                                                                                                                                                                                                                                                                                                                                                                                                                                                                                                                                                                                                                                                                                                                                                                                                                                                                                                                                                                                                                                              |

|            |                   |                        |                          |         |                                                                                                                                                                                                                                                                                                                                                                                                                                                                                                                                                                                                                                                 |
|------------|-------------------|------------------------|--------------------------|---------|-------------------------------------------------------------------------------------------------------------------------------------------------------------------------------------------------------------------------------------------------------------------------------------------------------------------------------------------------------------------------------------------------------------------------------------------------------------------------------------------------------------------------------------------------------------------------------------------------------------------------------------------------|
| GO:0016311 | dephosphorylation | 53 of 4104 in the list | 72 of 8404 in the genome | 0.01658 | CCG002156.2,CCG008411.1,CCG024246.1,CCG007874.3,CCG021496.1,CCG012754.1,CCG010014.1,CCG009398.1,CCG013128.1,CCG021269.1,CCG004212.1,CCG008194.1,CCG020010.1,CCG026143.1,CCG011382.1,CCG002687.2,CCG021890.1,CCG004101.1,CCG022627.1,CCG015077.1,CCG012046.1,CCG016460.1,CCG000839.1,CCG011683.1,CCG027539.1,CCG007485.1,CCG001788.1,CCG001051.1,CCG003693.1,CCG013101.1,CCG007177.1,CCG028615.1,CCG003362.1,CCG026300.1,CCG013007.1,CCG007358.1,CCG006691.1,CCG002105.1,CCG021178.1,CCG006884.1,CCG021369.1,CCG008652.1,CCG014945.1,CCG000926.1,CCG018688.1,CCG008081.1,CCG021617.1,CCG010776.1,CCG020055.1,CCG020784.1,CCG012277.1,CCG026212.1 |
|------------|-------------------|------------------------|--------------------------|---------|-------------------------------------------------------------------------------------------------------------------------------------------------------------------------------------------------------------------------------------------------------------------------------------------------------------------------------------------------------------------------------------------------------------------------------------------------------------------------------------------------------------------------------------------------------------------------------------------------------------------------------------------------|



|            |                               |                         |                           |         |                                                                                                                                                                                                                                                                                                                                                                                                                                                                                                                                                                                                                                                                                                                                                                                                                                                                                                                                                                                                                                                                                                                                                                                                                                                                                                                                                                                                                                                                                                  |
|------------|-------------------------------|-------------------------|---------------------------|---------|--------------------------------------------------------------------------------------------------------------------------------------------------------------------------------------------------------------------------------------------------------------------------------------------------------------------------------------------------------------------------------------------------------------------------------------------------------------------------------------------------------------------------------------------------------------------------------------------------------------------------------------------------------------------------------------------------------------------------------------------------------------------------------------------------------------------------------------------------------------------------------------------------------------------------------------------------------------------------------------------------------------------------------------------------------------------------------------------------------------------------------------------------------------------------------------------------------------------------------------------------------------------------------------------------------------------------------------------------------------------------------------------------------------------------------------------------------------------------------------------------|
| GO:0044085 | cellular component biogenesis | 138 of 4104 in the list | 221 of 8404 in the genome | 0.02816 | CCG023263.1,CCG014531.2,CCG006420.1,CCG013000.1,CCG005477.1,CCG003361.1,CCG006357.1,CCG010647.1,CCG005370.1,CCG016274.1,CCG026473.1,CCG012476.1,CCG002696.1,CCG014537.1,CCG005194.1,CCG024623.1,CCG014836.1,CCG024177.1,CCG004481.1,CCG012514.1,CCG027196.1,CCG002099.1,CCG018636.1,CCG002792.1,CCG016370.1,CCG010792.1,CCG003485.1,CCG015998.1,CCG025893.1,CCG023053.1,CCG010905.1,CCG010909.1,CCG028653.1,CCG020286.1,CCG017580.1,CCG009980.1,CCG002735.1,CCG015968.1,CCG018893.1,CCG010649.1,CCG025877.1,CCG015560.1,CCG002366.1,CCG009080.1,CCG027198.1,CCG025396.1,CCG008559.1,CCG027696.1,CCG002681.1,CCG010650.1,CCG000708.1,CCG025990.1,CCG024624.1,CCG009543.1,CCG004494.1,CCG015289.1,CCG010908.1,CCG005716.1,CCG022673.1,CCG026159.1,CCG023511.1,CCG020442.1,CCG002852.1,CCG024787.1,CCG012584.1,CCG000834.1,CCG018859.3,CCG008302.1,CCG002564.1,CCG024788.1,CCG018407.1,CCG027579.1,CCG019284.1,CCG021491.1,CCG010136.1,CCG008560.1,CCG003310.1,CCG009243.1,CCG013617.1,CCG003055.1,CCG007636.1,CCG000433.1,CCG005176.1,CCG010137.1,CCG016760.1,CCG009461.1,CCG023963.3,CCG006421.1,CCG025880.1,CCG007395.1,CCG010904.1,CCG018046.1,CCG014772.1,CCG026474.1,CCG017033.1,CCG014824.1,CCG011449.1,CCG007532.1,CCG009637.1,CCG015583.1,CCG007531.1,CCG018820.3,CCG026579.1,CCG022486.1,CCG010648.1,CCG022629.1,CCG013637.1,CCG007962.1,CCG010906.1,CCG010138.1,CCG010418.1,CCG008892.2,CCG027199.1,CCG019953.1,CCG009214.1,CCG000540.1,CCG018287.1,CCG010907.1,CCG008748.1,CCG012229.1, |
| GO:0032259 | methylation                   | 25 of 4104 in the list  | 29 of 8404 in the genome  | 0.03325 | CCG014335.1,CCG000417.1,CCG011888.1,CCG008401.1,CCG026248.1,CCG009425.1,CCG021449.1,CCG003755.1,CCG021244.2,CCG022674.1,CCG004234.1,CCG017176.1,CCG015398.1,CCG023905.2,CCG025940.1,CCG002946.1,CCG010791.1,CCG012083.1,CCG016016.1,CCG001369.2,CCG024098.1,CCG023156.1,CCG025991.2,CCG014986.1,                                                                                                                                                                                                                                                                                                                                                                                                                                                                                                                                                                                                                                                                                                                                                                                                                                                                                                                                                                                                                                                                                                                                                                                                 |

|            |                                         |                        |                          |         |                                                                                                                                                                                                                                                                                                                                                                                                                                                                                                                                                                                                                         |
|------------|-----------------------------------------|------------------------|--------------------------|---------|-------------------------------------------------------------------------------------------------------------------------------------------------------------------------------------------------------------------------------------------------------------------------------------------------------------------------------------------------------------------------------------------------------------------------------------------------------------------------------------------------------------------------------------------------------------------------------------------------------------------------|
| GO:0045333 | cellular respiration                    | 28 of 4104 in the list | 34 of 8404 in the genome | 0.06065 | CCG024798.1,CCG004155.2,CCG023685.1,CCG000102.1,CCG018684.1,CCG001649.1,CCG012727.1,CCG018128.1,CCG011547.1,CCG006864.1,CCG020956.1,CCG004244.1,CCG011237.1,CCG019712.1,CCG009771.2,CCG001842.1,CCG020879.1,CCG023350.1,CCG014053.1,CCG001072.1,CCG012249.1,CCG016431.1,CCG006459.1,CCG000089.1,CCG027631.1,CCG020707.1,CCG025163.3,CCG024297.1                                                                                                                                                                                                                                                                         |
| GO:0048523 | negative regulation of cellular process | 46 of 4104 in the list | 63 of 8404 in the genome | 0.08496 | CCG003216.1,CCG026798.1,CCG024952.1,CCG028409.1,CCG023484.1,CCG026841.1,CCG025758.1,CCG010489.1,CCG009446.1,CCG015062.1,CCG003390.1,CCG025132.1,CCG005898.1,CCG019102.1,CCG003765.1,CCG019427.1,CCG001794.1,CCG020974.1,CCG005486.1,CCG017498.1,CCG001079.1,CCG004073.1,CCG018321.1,CCG021064.1,CCG012573.1,CCG008308.1,CCG002823.1,CCG006063.1,CCG014461.1,CCG016445.1,CCG011501.1,CCG001795.1,CCG000890.1,CCG006412.1,CCG005487.1,CCG005485.1,CCG004838.1,CCG004343.1,CCG006714.1,CCG025026.1,CCG023431.1,CCG016835.2,CCG025057.1,CCG014323.1,CCG021704.1,CCG015450.1                                                 |
| GO:0007018 | microtubule-based movement              | 50 of 4104 in the list | 70 of 8404 in the genome | 0.1075  | CCG006420.1,CCG014305.1,CCG013637.1,CCG023488.2,CCG017480.1,CCG012733.1,CCG003707.1,CCG010695.1,CCG010418.1,CCG009080.1,CCG009243.1,CCG025396.1,CCG023319.1,CCG021818.1,CCG001770.1,CCG010622.1,CCG001167.1,CCG002696.1,CCG025520.1,CCG001881.1,CCG010657.1,CCG008748.1,CCG025751.1,CCG006421.1,CCG005696.1,CCG023963.3,CCG016119.1,CCG008801.1,CCG015289.1,CCG024300.1,CCG000825.1,CCG005525.1,CCG021228.1,CCG016370.1,CCG019329.1,CCG005886.1,CCG003024.1,CCG002852.1,CCG010864.1,CCG010363.1,CCG006361.2,CCG021317.1,CCG008377.1,CCG017837.1,CCG007532.1,CCG007531.1,CCG021895.1,CCG018820.3,CCG008246.1,CCG018918.1 |

|            |                             |                        |                           |         |                                                                                                                                                                                                                                                                                                                                                                                                                                                                                                                                                                                                                                                                                                                                                                                                                                                                                                                                                                                                 |
|------------|-----------------------------|------------------------|---------------------------|---------|-------------------------------------------------------------------------------------------------------------------------------------------------------------------------------------------------------------------------------------------------------------------------------------------------------------------------------------------------------------------------------------------------------------------------------------------------------------------------------------------------------------------------------------------------------------------------------------------------------------------------------------------------------------------------------------------------------------------------------------------------------------------------------------------------------------------------------------------------------------------------------------------------------------------------------------------------------------------------------------------------|
| GO:0006928 | cellular component movement | 51 of 4104 in the list | 72 of 8404 in the genome  | 0.13035 | CCG006420.1,CCG014305.1,CCG013637.1,CCG023488.2,CCG017480.1,CCG012733.1,CCG003707.1,CCG010695.1,CCG010418.1,CCG009080.1,CCG009243.1,CCG025396.1,CCG023319.1,CCG021818.1,CCG001770.1,CCG010622.1,CCG001167.1,CCG002696.1,CCG025520.1,CCG001881.1,CCG010657.1,CCG008748.1,CCG025751.1,CCG006421.1,CCG005696.1,CCG023963.3,CCG016119.1,CCG008801.1,CCG015289.1,CCG024300.1,CCG000825.1,CCG005525.1,CCG021228.1,CCG016370.1,CCG019329.1,CCG005886.1,CCG003024.1,CCG002852.1,CCG010864.1,CCG010363.1,CCG013982.1,CCG006361.2,CCG021317.1,CCG008377.1,CCG017837.1,CCG007532.1,CCG007531.1,CCG021895.1,CCG018820.2,CCG008246.1,CCG018018.1                                                                                                                                                                                                                                                                                                                                                             |
| GO:0032774 | RNA biosynthetic process    | 84 of 4104 in the list | 129 of 8404 in the genome | 0.1377  | CCG000158.1,CCG017812.1,CCG006211.1,CCG016968.1,CCG007155.1,CCG021944.1,CCG010647.1,CCG005846.1,CCG011129.1,CCG026882.1,CCG018164.1,CCG018507.1,CCG015039.1,CCG004224.1,CCG026473.1,CCG000489.1,CCG001292.1,CCG000209.1,CCG021521.1,CCG002470.1,CCG006164.1,CCG018617.1,CCG023184.1,CCG020377.1,CCG008027.1,CCG021940.1,CCG006686.1,CCG013174.1,CCG018168.1,CCG007856.1,CCG019333.1,CCG018719.1,CCG018796.1,CCG025691.1,CCG027401.1,CCG018243.1,CCG027950.1,CCG024597.1,CCG027115.1,CCG020129.1,CCG018768.2,CCG021083.1,CCG020286.1,CCG020044.1,CCG010797.1,CCG001509.1,CCG001477.1,CCG006767.1,CCG010138.1,CCG000824.1,CCG019296.1,CCG014840.1,CCG004151.1,CCG015694.1,CCG006484.1,CCG015704.1,CCG018326.1,CCG023775.1,CCG010509.1,CCG017046.2,CCG011083.1,CCG010510.1,CCG020460.1,CCG019541.1,CCG010650.1,CCG024624.1,CCG024392.1,CCG009894.1,CCG011710.1,CCG011384.1,CCG025157.1,CCG027197.1,CCG003112.1,CCG010175.1,CCG009805.2,CCG003142.1,CCG024200.1,CCG023125.1,CCG016776.1,CCG016381.1 |

|            |                  |                        |                          |       |                                                                                                                                                                                                                                                                                                                                                  |
|------------|------------------|------------------------|--------------------------|-------|--------------------------------------------------------------------------------------------------------------------------------------------------------------------------------------------------------------------------------------------------------------------------------------------------------------------------------------------------|
| GO:0009451 | RNA modification | 30 of 4104 in the list | 38 of 8404 in the genome | 0.146 | CCG016251.1,CCG014335.1,CCG014946.1,CCG008401.1,CCG027340.1,CCG022183.1,CCG019389.1,CCG009425.1,CCG016652.1,CCG002792.1,CCG003755.1,CCG004234.1,CCG017176.1,CCG005097.1,CCG019953.1,CCG016274.1,CCG000540.1,CCG024750.2,CCG019292.1,CCG020589.1,CCG011971.1,CCG023156.1,CCG019012.1,CCG027125.1,CCG004440.1,CCG005020.1,CCG018019.1,CCG028653.1, |
|------------|------------------|------------------------|--------------------------|-------|--------------------------------------------------------------------------------------------------------------------------------------------------------------------------------------------------------------------------------------------------------------------------------------------------------------------------------------------------|

|            |                 |                         |                           |         |                                                                                                                                                                                                                                                                                                                                                                                                                                                                                                                                                                                                                                                                                                                                                                                                                                                                                                                                                                                                                                                                                                                                                                                                                                                                                                                                                                                                                                                                                                  |
|------------|-----------------|-------------------------|---------------------------|---------|--------------------------------------------------------------------------------------------------------------------------------------------------------------------------------------------------------------------------------------------------------------------------------------------------------------------------------------------------------------------------------------------------------------------------------------------------------------------------------------------------------------------------------------------------------------------------------------------------------------------------------------------------------------------------------------------------------------------------------------------------------------------------------------------------------------------------------------------------------------------------------------------------------------------------------------------------------------------------------------------------------------------------------------------------------------------------------------------------------------------------------------------------------------------------------------------------------------------------------------------------------------------------------------------------------------------------------------------------------------------------------------------------------------------------------------------------------------------------------------------------|
| GO:0010467 | gene expression | 362 of 4104 in the list | 649 of 8404 in the genome | 0.14601 | CCG014531.2,CCG023277.1,CCG014396.1,CCG004807.1,CCG010191.3,CCG013430.1,CCG006357.1,CCG009878.1,CCG010647.1,CCG016758.1,CCG024072.1,CCG026882.1,CCG012142.1,CCG018507.1,CCG020685.1,CCG002354.1,CCG016238.1,CCG026473.1,CCG001292.1,CCG023173.1,CCG026825.1,CCG002470.1,CCG003573.1,CCG020804.1,CCG025223.1,CCG001040.1,CCG019382.1,CCG026871.2,CCG015546.1,CCG018719.1,CCG010792.1,CCG004231.1,CCG023053.1,CCG008270.1,CCG027115.1,CCG020129.1,CCG023129.1,CCG005737.1,CCG028042.1,CCG009235.1,CCG020877.1,CCG009249.1,CCG006231.1,CCG020286.1,CCG014896.1,CCG002735.1,CCG001863.1,CCG006767.1,CCG019296.1,CCG008871.1,CCG014840.1,CCG014819.1,CCG018788.1,CCG006484.1,CCG026602.1,CCG006344.1,CCG001461.1,CCG026280.1,CCG023686.1,CCG010510.1,CCG003938.1,CCG021737.1,CCG000773.1,CCG018902.1,CCG004927.1,CCG009805.2,CCG002966.1,CCG019545.1,CCG003142.1,CCG019330.1,CCG001876.1,CCG000915.1,CCG018402.1,CCG024200.1,CCG023125.1,CCG010624.1,CCG027748.1,CCG015894.1,CCG000294.1,CCG026612.1,CCG004926.1,CCG016778.1,CCG010912.1,CCG004955.1,CCG015367.1,CCG005524.1,CCG007155.1,CCG024857.1,CCG020032.1,CCG000368.1,CCG026516.1,CCG003471.1,CCG018164.1,CCG004224.1,CCG010112.1,CCG019398.1,CCG011135.1,CCG006876.1,CCG028092.1,CCG000209.1,CCG016760.1,CCG021521.1,CCG001395.1,CCG023184.1,CCG003153.1,CCG000939.1,CCG021940.1,CCG013174.1,CCG022183.1,CCG018168.1,CCG017344.1,CCG019426.1,CCG018796.1,CCG025691.1,CCG009394.1,CCG027401.1,CCG002644.1,CCG014824.1,CCG024813.1,CCG018243.1, |
|------------|-----------------|-------------------------|---------------------------|---------|--------------------------------------------------------------------------------------------------------------------------------------------------------------------------------------------------------------------------------------------------------------------------------------------------------------------------------------------------------------------------------------------------------------------------------------------------------------------------------------------------------------------------------------------------------------------------------------------------------------------------------------------------------------------------------------------------------------------------------------------------------------------------------------------------------------------------------------------------------------------------------------------------------------------------------------------------------------------------------------------------------------------------------------------------------------------------------------------------------------------------------------------------------------------------------------------------------------------------------------------------------------------------------------------------------------------------------------------------------------------------------------------------------------------------------------------------------------------------------------------------|

|            |                                                                |                        |                          |         |                                                                                                                                                                                                                                                                                                                                                                                                                                                                                                                                                                         |
|------------|----------------------------------------------------------------|------------------------|--------------------------|---------|-------------------------------------------------------------------------------------------------------------------------------------------------------------------------------------------------------------------------------------------------------------------------------------------------------------------------------------------------------------------------------------------------------------------------------------------------------------------------------------------------------------------------------------------------------------------------|
| GO:0048519 | negative regulation of biological process                      | 46 of 4104 in the list | 64 of 8404 in the genome | 0.15964 | CCG003216.1,CCG026798.1,CCG024952.1,CCG028409.1,CCG023484.1,CCG026841.1,CCG025758.1,CCG010489.1,CCG009446.1,CCG015062.1,CCG003390.1,CCG025132.1,CCG005898.1,CCG019102.1,CCG003765.1,CCG019427.1,CCG001794.1,CCG020974.1,CCG005486.1,CCG017498.1,CCG001079.1,CCG004073.1,CCG018321.1,CCG021064.1,CCG012573.1,CCG008308.1,CCG002823.1,CCG006063.1,CCG014461.1,CCG016445.1,CCG011501.1,CCG001795.1,CCG000890.1,CCG006412.1,CCG005487.1,CCG005485.1,CCG004838.1,CCG004343.1,CCG006714.1,CCG025026.1,CCG023431.1,CCG016835.2,CCG025057.1,CCG014323.1,CCG021704.1,CCG015450.1 |
| GO:0015985 | energy coupled proton transport, down electrochemical gradient | 15 of 4104 in the list | 16 of 8404 in the genome | 0.20058 | CCG015410.1,CCG002038.1,CCG025107.1,CCG010112.1,CCG009142.1,CCG023640.1,CCG000148.1,CCG025348.1,CCG007724.1,CCG025989.2,CCG021934.1,CCG019619.1,CCG005924.2,CCG013643.1,CCG008422.1                                                                                                                                                                                                                                                                                                                                                                                     |
| GO:0015986 | ATP synthesis coupled proton transport                         | 15 of 4104 in the list | 16 of 8404 in the genome | 0.20058 | CCG015410.1,CCG002038.1,CCG025107.1,CCG010112.1,CCG009142.1,CCG023640.1,CCG000148.1,CCG025348.1,CCG007724.1,CCG025989.2,CCG021934.1,CCG019619.1,CCG005924.2,CCG013643.1,CCG008422.1                                                                                                                                                                                                                                                                                                                                                                                     |

|            |                                  |                         |                           |        |                                                                                                                                                                                                                                                                                                                                                                                                                                                                                                                                                                                                                                                                                                                                                                                                                                                                                                                                                                                                                                                                                                                                                                                                                                                                                                                                                                                                                                                                                                  |
|------------|----------------------------------|-------------------------|---------------------------|--------|--------------------------------------------------------------------------------------------------------------------------------------------------------------------------------------------------------------------------------------------------------------------------------------------------------------------------------------------------------------------------------------------------------------------------------------------------------------------------------------------------------------------------------------------------------------------------------------------------------------------------------------------------------------------------------------------------------------------------------------------------------------------------------------------------------------------------------------------------------------------------------------------------------------------------------------------------------------------------------------------------------------------------------------------------------------------------------------------------------------------------------------------------------------------------------------------------------------------------------------------------------------------------------------------------------------------------------------------------------------------------------------------------------------------------------------------------------------------------------------------------|
| GO:0018130 | heterocycle biosynthetic process | 169 of 4104 in the list | 286 of 8404 in the genome | 0.2776 | CCG000158.1,CCG017812.1,CCG006211.1,CCG016968.1,CCG017331.1,CCG021944.1,CCG010647.1,CCG005846.1,CCG025989.2,CCG021335.1,CCG011129.1,CCG026882.1,CCG025493.1,CCG018507.1,CCG015039.1,CCG026174.1,CCG000016.1,CCG026473.1,CCG001292.1,CCG016220.1,CCG002470.1,CCG006164.1,CCG018617.1,CCG020377.1,CCG008027.1,CCG026536.1,CCG006686.1,CCG007993.1,CCG023780.2,CCG007856.1,CCG001423.1,CCG018719.1,CCG005053.1,CCG025940.1,CCG008860.1,CCG008609.1,CCG010944.1,CCG027115.1,CCG021110.1,CCG020129.1,CCG015746.1,CCG020286.1,CCG020044.1,CCG023640.1,CCG001477.1,CCG021086.2,CCG006767.1,CCG019296.1,CCG000824.1,CCG025348.1,CCG019619.1,CCG014840.1,CCG015694.1,CCG006484.1,CCG018326.1,CCG028131.1,CCG023775.1,CCG010509.1,CCG011083.1,CCG024432.2,CCG010510.1,CCG019541.1,CCG010650.1,CCG010460.1,CCG024624.1,CCG024392.1,CCG009894.1,CCG015410.1,CCG003865.1,CCG011710.1,CCG009142.1,CCG011384.1,CCG026898.1,CCG023452.1,CCG009805.2,CCG010175.1,CCG014116.1,CCG017111.1,CCG003142.1,CCG013610.1,CCG003173.1,CCG009518.1,CCG023125.1,CCG024200.1,CCG016776.1,CCG016381.1,CCG006791.1,CCG000468.1,CCG026865.1,CCG004926.1,CCG026047.1,CCG017175.1,CCG007155.1,CCG007610.1,CCG011491.1,CCG006529.1,CCG007533.1,CCG008422.1,CCG018164.1,CCG004224.1,CCG000489.1,CCG010112.1,CCG000209.1,CCG021521.1,CCG020441.1,CCG013643.1,CCG023184.1,CCG021940.1,CCG002038.1,CCG010561.1,CCG013174.1,CCG018168.1,CCG000148.1,CCG019333.1,CCG018453.1,CCG013365.1,CCG025691.1,CCG018796.1,CCG005924.2,CCG027401.1, |
|------------|----------------------------------|-------------------------|---------------------------|--------|--------------------------------------------------------------------------------------------------------------------------------------------------------------------------------------------------------------------------------------------------------------------------------------------------------------------------------------------------------------------------------------------------------------------------------------------------------------------------------------------------------------------------------------------------------------------------------------------------------------------------------------------------------------------------------------------------------------------------------------------------------------------------------------------------------------------------------------------------------------------------------------------------------------------------------------------------------------------------------------------------------------------------------------------------------------------------------------------------------------------------------------------------------------------------------------------------------------------------------------------------------------------------------------------------------------------------------------------------------------------------------------------------------------------------------------------------------------------------------------------------|

|            |                                                     |                        |                          |         |                                                                                                                                                                                                                                                                                                                                                                                                 |
|------------|-----------------------------------------------------|------------------------|--------------------------|---------|-------------------------------------------------------------------------------------------------------------------------------------------------------------------------------------------------------------------------------------------------------------------------------------------------------------------------------------------------------------------------------------------------|
| GO:0015980 | energy derivation by oxidation of organic compounds | 32 of 4104 in the list | 42 of 8404 in the genome | 0.28958 | CCG024798.1,CCG023685.1,CCG000102.1,CCG001649.1,CCG012727.1,CCG011547.1,CCG006864.1,CCG008130.1,CCG001842.1,CCG020879.1,CCG023350.1,CCG012249.1,CCG006459.1,CCG024297.1,CCG004155.2,CCG018684.1,CCG018128.1,CCG004244.1,CCG020956.1,CCG011237.1,CCG022430.1,CCG009771.2,CCG019712.1,CCG004760.1,CCG014053.1,CCG001072.1,CCG016431.1,CCG000089.1,CCG027631.1,CCG025015.2,CCG025163.3,CCG020707.1 |
|------------|-----------------------------------------------------|------------------------|--------------------------|---------|-------------------------------------------------------------------------------------------------------------------------------------------------------------------------------------------------------------------------------------------------------------------------------------------------------------------------------------------------------------------------------------------------|



|            |                                                 |                         |                           |         |                                                                                                                                                                                                                                                                                                                                                                                                                                                                                                                                                                                                                                                                                                                                                                                                                                                                                                                                                                                                                                                                                                                                                                                                                                                                                                                                                                                                                                                                                                  |
|------------|-------------------------------------------------|-------------------------|---------------------------|---------|--------------------------------------------------------------------------------------------------------------------------------------------------------------------------------------------------------------------------------------------------------------------------------------------------------------------------------------------------------------------------------------------------------------------------------------------------------------------------------------------------------------------------------------------------------------------------------------------------------------------------------------------------------------------------------------------------------------------------------------------------------------------------------------------------------------------------------------------------------------------------------------------------------------------------------------------------------------------------------------------------------------------------------------------------------------------------------------------------------------------------------------------------------------------------------------------------------------------------------------------------------------------------------------------------------------------------------------------------------------------------------------------------------------------------------------------------------------------------------------------------|
| GO:0044271 | cellular nitrogen compound biosynthetic process | 177 of 4104 in the list | 302 of 8404 in the genome | 0.35805 | CCG000158.1,CCG010174.2,CCG017812.1,CCG006211.1,CCG016968.1,CCG017331.1,CCG021944.1,CCG010647.1,CCG005846.1,CCG025989.2,CCG021335.1,CCG011129.1,CCG026882.1,CCG025493.1,CCG018507.1,CCG015039.1,CCG026174.1,CCG000016.1,CCG026473.1,CCG001292.1,CCG002470.1,CCG006164.1,CCG018617.1,CCG002495.1,CCG020377.1,CCG008027.1,CCG026536.1,CCG006686.1,CCG007993.1,CCG023780.2,CCG007856.1,CCG018719.1,CCG005053.1,CCG025940.1,CCG027282.1,CCG008609.1,CCG009515.2,CCG010944.1,CCG027115.1,CCG021110.1,CCG020129.1,CCG015746.1,CCG020286.1,CCG020044.1,CCG023640.1,CCG001477.1,CCG028391.1,CCG021086.2,CCG006767.1,CCG019296.1,CCG000824.1,CCG025348.1,CCG019619.1,CCG014840.1,CCG015694.1,CCG006484.1,CCG018326.1,CCG028131.1,CCG023775.1,CCG010509.1,CCG011083.1,CCG010510.1,CCG019541.1,CCG010650.1,CCG010460.1,CCG024624.1,CCG024392.1,CCG006821.1,CCG009894.1,CCG015410.1,CCG011710.1,CCG003865.1,CCG009142.1,CCG011384.1,CCG026898.1,CCG023452.1,CCG002883.1,CCG009805.2,CCG010175.1,CCG014116.1,CCG003142.1,CCG013610.1,CCG003173.1,CCG009518.1,CCG023125.1,CCG024200.1,CCG016776.1,CCG016381.1,CCG006791.1,CCG000468.1,CCG026865.1,CCG004926.1,CCG022191.1,CCG026047.1,CCG017175.1,CCG007155.1,CCG007610.1,CCG011491.1,CCG006529.1,CCG009333.1,CCG002555.1,CCG007533.1,CCG008422.1,CCG018164.1,CCG004224.1,CCG010112.1,CCG000489.1,CCG000209.1,CCG021521.1,CCG020441.1,CCG013643.1,CCG023184.1,CCG021940.1,CCG002038.1,CCG010561.1,CCG013174.1,CCG018168.1,CCG000148.1,CCG019333.1,CCG018453.1, |
|------------|-------------------------------------------------|-------------------------|---------------------------|---------|--------------------------------------------------------------------------------------------------------------------------------------------------------------------------------------------------------------------------------------------------------------------------------------------------------------------------------------------------------------------------------------------------------------------------------------------------------------------------------------------------------------------------------------------------------------------------------------------------------------------------------------------------------------------------------------------------------------------------------------------------------------------------------------------------------------------------------------------------------------------------------------------------------------------------------------------------------------------------------------------------------------------------------------------------------------------------------------------------------------------------------------------------------------------------------------------------------------------------------------------------------------------------------------------------------------------------------------------------------------------------------------------------------------------------------------------------------------------------------------------------|

|            |                                              |                         |                           |         |                                                                                                                                                                                                                                                                                                                                                                                                                                                                                                                                                                                                                                                                                                                                                                                                                                                                                                                                                                                                                                                                                                                                                                                                                                                                                                                                                                                                                                                                                                  |
|------------|----------------------------------------------|-------------------------|---------------------------|---------|--------------------------------------------------------------------------------------------------------------------------------------------------------------------------------------------------------------------------------------------------------------------------------------------------------------------------------------------------------------------------------------------------------------------------------------------------------------------------------------------------------------------------------------------------------------------------------------------------------------------------------------------------------------------------------------------------------------------------------------------------------------------------------------------------------------------------------------------------------------------------------------------------------------------------------------------------------------------------------------------------------------------------------------------------------------------------------------------------------------------------------------------------------------------------------------------------------------------------------------------------------------------------------------------------------------------------------------------------------------------------------------------------------------------------------------------------------------------------------------------------|
| GO:1901362 | organic cyclic compound biosynthetic process | 171 of 4104 in the list | 291 of 8404 in the genome | 0.37607 | CCG000158.1,CCG017812.1,CCG006211.1,CCG016968.1,CCG017331.1,CCG021944.1,CCG010647.1,CCG005846.1,CCG025989.2,CCG021335.1,CCG011129.1,CCG026882.1,CCG025493.1,CCG018507.1,CCG015039.1,CCG026174.1,CCG000016.1,CCG026473.1,CCG001292.1,CCG016220.1,CCG002470.1,CCG006164.1,CCG018617.1,CCG020377.1,CCG008027.1,CCG026536.1,CCG006686.1,CCG007993.1,CCG023780.2,CCG007856.1,CCG001423.1,CCG018719.1,CCG005053.1,CCG025940.1,CCG008860.1,CCG008609.1,CCG010944.1,CCG027115.1,CCG021110.1,CCG020129.1,CCG015746.1,CCG020286.1,CCG020044.1,CCG023640.1,CCG001477.1,CCG021086.2,CCG006767.1,CCG019296.1,CCG000824.1,CCG025348.1,CCG019619.1,CCG014840.1,CCG015694.1,CCG006484.1,CCG018326.1,CCG028131.1,CCG023775.1,CCG010509.1,CCG011083.1,CCG024432.2,CCG010510.1,CCG019541.1,CCG010650.1,CCG010460.1,CCG024624.1,CCG024392.1,CCG009894.1,CCG015410.1,CCG003865.1,CCG011710.1,CCG009142.1,CCG011384.1,CCG026898.1,CCG023452.1,CCG009805.2,CCG010175.1,CCG014116.1,CCG017111.1,CCG003142.1,CCG013610.1,CCG003173.1,CCG009518.1,CCG023125.1,CCG024200.1,CCG016776.1,CCG016381.1,CCG006791.1,CCG000468.1,CCG026865.1,CCG004926.1,CCG026047.1,CCG017175.1,CCG007155.1,CCG007610.1,CCG011491.1,CCG006529.1,CCG007533.1,CCG008422.1,CCG018164.1,CCG004224.1,CCG000489.1,CCG010112.1,CCG000209.1,CCG021521.1,CCG020441.1,CCG013643.1,CCG023184.1,CCG021940.1,CCG002038.1,CCG010561.1,CCG013174.1,CCG018168.1,CCG000148.1,CCG019333.1,CCG018453.1,CCG013365.1,CCG025691.1,CCG018796.1,CCG005924.2,CCG027401.1, |
|------------|----------------------------------------------|-------------------------|---------------------------|---------|--------------------------------------------------------------------------------------------------------------------------------------------------------------------------------------------------------------------------------------------------------------------------------------------------------------------------------------------------------------------------------------------------------------------------------------------------------------------------------------------------------------------------------------------------------------------------------------------------------------------------------------------------------------------------------------------------------------------------------------------------------------------------------------------------------------------------------------------------------------------------------------------------------------------------------------------------------------------------------------------------------------------------------------------------------------------------------------------------------------------------------------------------------------------------------------------------------------------------------------------------------------------------------------------------------------------------------------------------------------------------------------------------------------------------------------------------------------------------------------------------|

|            |                            |                          |                            |         |                                                                                                                                                                                                                                                                                                                                                                                                                                                                                                                                                                                                                                                                                                                                                                                                                                                                                                                                                                                                                                                                                                                                                                                                                                                                                                                                                                                                                                                                                                  |
|------------|----------------------------|--------------------------|----------------------------|---------|--------------------------------------------------------------------------------------------------------------------------------------------------------------------------------------------------------------------------------------------------------------------------------------------------------------------------------------------------------------------------------------------------------------------------------------------------------------------------------------------------------------------------------------------------------------------------------------------------------------------------------------------------------------------------------------------------------------------------------------------------------------------------------------------------------------------------------------------------------------------------------------------------------------------------------------------------------------------------------------------------------------------------------------------------------------------------------------------------------------------------------------------------------------------------------------------------------------------------------------------------------------------------------------------------------------------------------------------------------------------------------------------------------------------------------------------------------------------------------------------------|
| GO:0044237 | cellular metabolic process | 1617 of 4104 in the list | 3157 of 8404 in the genome | 0.40868 | CCG014531.2,CCG017420.1,CCG027068.1,CCG014396.1,CCG006549.1,CCG004887.1,CCG026106.1,CCG016952.1,CCG012875.1,CCG025108.1,CCG026174.1,CCG004468.1,CCG023989.1,CCG012726.1,CCG024584.1,CCG001292.1,CCG018432.1,CCG001040.1,CCG017266.1,CCG028198.1,CCG016689.2,CCG025208.1,CCG021479.1,CCG003362.1,CCG014515.1,CCG019113.1,CCG023381.1,CCG019382.1,CCG019735.1,CCG020956.1,CCG016094.1,CCG026413.3,CCG023474.1,CCG026871.2,CCG010792.1,CCG012623.1,CCG022025.2,CCG005053.1,CCG011237.1,CCG021616.1,CCG005738.1,CCG013876.1,CCG010905.1,CCG008270.1,CCG021110.1,CCG024612.1,CCG027636.1,CCG028653.1,CCG004569.1,CCG020286.1,CCG013109.1,CCG021086.2,CCG006465.1,CCG015074.1,CCG019571.1,CCG008871.1,CCG015694.1,CCG018113.1,CCG018788.1,CCG006484.1,CCG002982.1,CCG012083.1,CCG026953.1,CCG026602.1,CCG024119.1,CCG023686.1,CCG019678.1,CCG007457.1,CCG021737.1,CCG025990.1,CCG013641.1,CCG015350.1,CCG021948.1,CCG020651.1,CCG005284.1,CCG004927.1,CCG009805.2,CCG024903.1,CCG021137.1,CCG022056.1,CCG013610.1,CCG001876.1,CCG012584.1,CCG015186.1,CCG013465.1,CCG016327.2,CCG018688.1,CCG024200.1,CCG010624.1,CCG002231.1,CCG023458.1,CCG027748.1,CCG017001.1,CCG021767.1,CCG003520.1,CCG004926.1,CCG006928.1,CCG004532.1,CCG000789.1,CCG017381.1,CCG005588.1,CCG010912.1,CCG004955.1,CCG007874.3,CCG001704.1,CCG005524.1,CCG011547.1,CCG010014.1,CCG013640.1,CCG008404.1,CCG018201.1,CCG010136.1,CCG009333.1,CCG008287.1,CCG009574.1,CCG022370.1,CCG010112.1,CCG009038.1,CCG022513.2,CCG007750.2, |
|------------|----------------------------|--------------------------|----------------------------|---------|--------------------------------------------------------------------------------------------------------------------------------------------------------------------------------------------------------------------------------------------------------------------------------------------------------------------------------------------------------------------------------------------------------------------------------------------------------------------------------------------------------------------------------------------------------------------------------------------------------------------------------------------------------------------------------------------------------------------------------------------------------------------------------------------------------------------------------------------------------------------------------------------------------------------------------------------------------------------------------------------------------------------------------------------------------------------------------------------------------------------------------------------------------------------------------------------------------------------------------------------------------------------------------------------------------------------------------------------------------------------------------------------------------------------------------------------------------------------------------------------------|

|            |                              |                        |                           |         |                                                                                                                                                                                                                                                                                                                                                                                                                                                                                                                                                                                                                                                                                                                                                                                                                                                                                                                                                  |
|------------|------------------------------|------------------------|---------------------------|---------|--------------------------------------------------------------------------------------------------------------------------------------------------------------------------------------------------------------------------------------------------------------------------------------------------------------------------------------------------------------------------------------------------------------------------------------------------------------------------------------------------------------------------------------------------------------------------------------------------------------------------------------------------------------------------------------------------------------------------------------------------------------------------------------------------------------------------------------------------------------------------------------------------------------------------------------------------|
| GO:0006351 | transcription, DNA-templated | 80 of 4104 in the list | 125 of 8404 in the genome | 0.45285 | CCG000158.1,CCG017812.1,CCG006211.1,CCG016968.1,CCG007155.1,CCG021944.1,CCG010647.1,CCG005846.1,CCG011129.1,CCG026882.1,CCG018164.1,CCG018507.1,CCG015039.1,CCG004224.1,CCG026473.1,CCG000489.1,CCG001292.1,CCG000209.1,CCG021521.1,CCG002470.1,CCG018617.1,CCG023184.1,CCG020377.1,CCG008027.1,CCG021940.1,CCG006686.1,CCG013174.1,CCG018168.1,CCG007856.1,CCG019333.1,CCG018719.1,CCG018796.1,CCG025691.1,CCG027401.1,CCG018243.1,CCG027950.1,CCG024597.1,CCG027115.1,CCG020129.1,CCG018768.2,CCG021083.1,CCG020286.1,CCG020044.1,CCG010797.1,CCG001509.1,CCG001477.1,CCG006767.1,CCG010138.1,CCG000824.1,CCG019296.1,CCG014840.1,CCG004151.1,CCG006484.1,CCG015704.1,CCG018326.1,CCG023775.1,CCG010509.1,CCG017046.2,CCG011083.1,CCG010510.1,CCG020460.1,CCG019541.1,CCG010650.1,CCG024624.1,CCG024392.1,CCG009894.1,CCG011710.1,CCG011384.1,CCG025157.1,CCG027197.1,CCG003112.1,CCG010175.1,CCG009805.2,CCG003142.1,CCG024200.1,CCG023125.1, |
| GO:0006310 | DNA recombination            | 16 of 4104 in the list | 18 of 8404 in the genome  | 0.50567 | CCG019648.1,CCG017444.1,CCG021045.1,CCG000490.1,CCG008622.1,CCG020439.2,CCG023474.1,CCG009962.1,CCG010116.1,CCG000777.1,CCG008498.1,CCG006919.1,CCG018650.1,CCG028267.1,CCG000776.1,CCG018799.1                                                                                                                                                                                                                                                                                                                                                                                                                                                                                                                                                                                                                                                                                                                                                  |
| GO:0022900 | electron transport chain     | 16 of 4104 in the list | 18 of 8404 in the genome  | 0.50567 | CCG004155.2,CCG005677.1,CCG023685.1,CCG000102.1,CCG018684.1,CCG001649.1,CCG006864.1,CCG002790.1,CCG011237.1,CCG020879.1,CCG018614.1,CCG024119.1,CCG014053.1,CCG006459.1,CCG025163.3,CCG024297.1                                                                                                                                                                                                                                                                                                                                                                                                                                                                                                                                                                                                                                                                                                                                                  |

|            |                                                     |                         |                           |         |                                                                                                                                                                                                                                                                                                                                                                                                                                                                                                                                                                                                                                                                                                                                                                                                                                                                                                                                                                                                                                                                                                                                                                                                                                                                                                                                                                                                                                                                                                  |
|------------|-----------------------------------------------------|-------------------------|---------------------------|---------|--------------------------------------------------------------------------------------------------------------------------------------------------------------------------------------------------------------------------------------------------------------------------------------------------------------------------------------------------------------------------------------------------------------------------------------------------------------------------------------------------------------------------------------------------------------------------------------------------------------------------------------------------------------------------------------------------------------------------------------------------------------------------------------------------------------------------------------------------------------------------------------------------------------------------------------------------------------------------------------------------------------------------------------------------------------------------------------------------------------------------------------------------------------------------------------------------------------------------------------------------------------------------------------------------------------------------------------------------------------------------------------------------------------------------------------------------------------------------------------------------|
| GO:0034654 | nucleobase-containing compound biosynthetic process | 136 of 4104 in the list | 228 of 8404 in the genome | 0.62752 | CCG000158.1,CCG017812.1,CCG006211.1,CCG016968.1,CCG021944.1,CCG010647.1,CCG005846.1,CCG025989.2,CCG011129.1,CCG026882.1,CCG025493.1,CCG018507.1,CCG015039.1,CCG026174.1,CCG000016.1,CCG026473.1,CCG001292.1,CCG002470.1,CCG006164.1,CCG018617.1,CCG020377.1,CCG008027.1,CCG006686.1,CCG007993.1,CCG007856.1,CCG018719.1,CCG010944.1,CCG027115.1,CCG021110.1,CCG020129.1,CCG015746.1,CCG020286.1,CCG020044.1,CCG023640.1,CCG001477.1,CCG006767.1,CCG019296.1,CCG000824.1,CCG025348.1,CCG019619.1,CCG014840.1,CCG015694.1,CCG006484.1,CCG018326.1,CCG028131.1,CCG023775.1,CCG010509.1,CCG011083.1,CCG010510.1,CCG019541.1,CCG010650.1,CCG010460.1,CCG024624.1,CCG024392.1,CCG009894.1,CCG015410.1,CCG011710.1,CCG009142.1,CCG011384.1,CCG026898.1,CCG023452.1,CCG009805.2,CCG010175.1,CCG014116.1,CCG003142.1,CCG013610.1,CCG009518.1,CCG023125.1,CCG024200.1,CCG016776.1,CCG016381.1,CCG006791.1,CCG000468.1,CCG026865.1,CCG004926.1,CCG026047.1,CCG007155.1,CCG006529.1,CCG007533.1,CCG008422.1,CCG018164.1,CCG004224.1,CCG000489.1,CCG010112.1,CCG000209.1,CCG021521.1,CCG013643.1,CCG023184.1,CCG002038.1,CCG021940.1,CCG013174.1,CCG018168.1,CCG019333.1,CCG000148.1,CCG013365.1,CCG025691.1,CCG018796.1,CCG005924.2,CCG027401.1,CCG027950.1,CCG018243.1,CCG024597.1,CCG017330.1,CCG021934.1,CCG014379.1,CCG018768.2,CCG021083.1,CCG004180.1,CCG017995.1,CCG010797.1,CCG001509.1,CCG010138.1,CCG004151.1,CCG015704.1,CCG013999.1,CCG021336.1,CCG007417.1,CCG017046.2,CCG004440.1,CCG020460.1, |
| GO:0006270 | DNA replication initiation                          | 13 of 4104 in the list  | 14 of 8404 in the genome  | 0.74422 | CCG025352.1,CCG025208.1,CCG017380.1,CCG006549.1,CCG015711.1,CCG014280.1,CCG003904.1,CCG026258.1,CCG020651.1,CCG022735.1,CCG023633.1,CCG015599.1,                                                                                                                                                                                                                                                                                                                                                                                                                                                                                                                                                                                                                                                                                                                                                                                                                                                                                                                                                                                                                                                                                                                                                                                                                                                                                                                                                 |

|            |                        |                         |                           |         |                                                                                                                                                                                                                                                                                                                                                                                                                                                                                                                                                                                                                                                                                                                                                                                                                                                                                                                                                                                                                                                                                                                                                                                                                                                                                                                                                                                                                                                                                                  |
|------------|------------------------|-------------------------|---------------------------|---------|--------------------------------------------------------------------------------------------------------------------------------------------------------------------------------------------------------------------------------------------------------------------------------------------------------------------------------------------------------------------------------------------------------------------------------------------------------------------------------------------------------------------------------------------------------------------------------------------------------------------------------------------------------------------------------------------------------------------------------------------------------------------------------------------------------------------------------------------------------------------------------------------------------------------------------------------------------------------------------------------------------------------------------------------------------------------------------------------------------------------------------------------------------------------------------------------------------------------------------------------------------------------------------------------------------------------------------------------------------------------------------------------------------------------------------------------------------------------------------------------------|
| GO:0016072 | rRNA metabolic process | 23 of 4104 in the list  | 29 of 8404 in the genome  | 0.81785 | CCG023263.1,CCG020286.1,CCG002735.1,CCG027579.1,CCG007962.1,CCG018636.1,CCG006357.1,CCG023511.1,CCG005097.1,CCG005849.1,CCG019953.1,CCG014824.1,CCG009214.1,CCG003055.1,CCG020685.1,CCG016274.1,CCG023053.1,CCG007636.1,CCG005176.1,CCG019674.1,CCG016760.1,CCG018474.1,CCG022629.1                                                                                                                                                                                                                                                                                                                                                                                                                                                                                                                                                                                                                                                                                                                                                                                                                                                                                                                                                                                                                                                                                                                                                                                                              |
| GO:0006996 | organelle organization | 144 of 4104 in the list | 244 of 8404 in the genome | 0.8347  | CCG018832.1,CCG006211.1,CCG004973.1,CCG026823.1,CCG003361.1,CCG011675.1,CCG010647.1,CCG019356.1,CCG020949.1,CCG019028.1,CCG026473.1,CCG012476.1,CCG014817.2,CCG014537.1,CCG003587.1,CCG013028.1,CCG027236.1,CCG019217.1,CCG024028.1,CCG005194.1,CCG024623.1,CCG014836.1,CCG024177.1,CCG009641.1,CCG004481.1,CCG006686.1,CCG012514.1,CCG027196.1,CCG000575.1,CCG014318.1,CCG025893.1,CCG010905.1,CCG022456.1,CCG027899.1,CCG010538.1,CCG010909.1,CCG018647.1,CCG017580.1,CCG015784.1,CCG009980.1,CCG023682.1,CCG015968.1,CCG013509.1,CCG019140.1,CCG018893.1,CCG010649.1,CCG025877.1,CCG018767.1,CCG020987.1,CCG015560.1,CCG002366.1,CCG027198.1,CCG027167.1,CCG000469.1,CCG000587.1,CCG012083.1,CCG018326.1,CCG019029.1,CCG008559.1,CCG019082.1,CCG027696.1,CCG021448.1,CCG010650.1,CCG000708.1,CCG025990.1,CCG024624.1,CCG004494.1,CCG010908.1,CCG005716.1,CCG022673.1,CCG026159.1,CCG015398.1,CCG020442.1,CCG001810.1,CCG024787.1,CCG012584.1,CCG021366.1,CCG000834.1,CCG008302.1,CCG019092.1,CCG024788.1,CCG015570.1,CCG006899.1,CCG002479.1,CCG019284.1,CCG008560.1,CCG021491.1,CCG010136.1,CCG003310.1,CCG013617.1,CCG000433.1,CCG010137.1,CCG020315.1,CCG009461.1,CCG011262.1,CCG025880.1,CCG010904.1,CCG018482.1,CCG014772.1,CCG026474.1,CCG000535.1,CCG022536.3,CCG018249.1,CCG015167.1,CCG009637.1,CCG024421.3,CCG026579.1,CCG010648.1,CCG010178.1,CCG026688.1,CCG027348.1,CCG020863.1,CCG010906.1,CCG026620.1,CCG010138.1,CCG008892.2,CCG027199.1,CCG001369.2,CCG005579.1,CCG018287.1, |

|            |                                                   |                        |                          |         |                                                                                                                                                                                                                                                                                                                                                                                                                                                                                                              |
|------------|---------------------------------------------------|------------------------|--------------------------|---------|--------------------------------------------------------------------------------------------------------------------------------------------------------------------------------------------------------------------------------------------------------------------------------------------------------------------------------------------------------------------------------------------------------------------------------------------------------------------------------------------------------------|
| GO:0007346 | regulation of mitotic cell cycle                  | 10 of 4104 in the list | 10 of 8404 in the genome | 0.83752 | CCG004331.1,CCG009521.1,CCG013849.1,CCG027068.1,CCG017923.1,CCG009035.1,CCG002269.1,CCG012743.1,CCG026404.1,CCG018116.1                                                                                                                                                                                                                                                                                                                                                                                      |
| GO:0010564 | regulation of cell cycle process                  | 10 of 4104 in the list | 10 of 8404 in the genome | 0.83752 | CCG004331.1,CCG009521.1,CCG013849.1,CCG027068.1,CCG017923.1,CCG009035.1,CCG002269.1,CCG012743.1,CCG026404.1,CCG018116.1                                                                                                                                                                                                                                                                                                                                                                                      |
| GO:1901987 | regulation of cell cycle phase transition         | 10 of 4104 in the list | 10 of 8404 in the genome | 0.83752 | CCG004331.1,CCG009521.1,CCG013849.1,CCG027068.1,CCG017923.1,CCG009035.1,CCG002269.1,CCG012743.1,CCG026404.1,CCG018116.1                                                                                                                                                                                                                                                                                                                                                                                      |
| GO:1901990 | regulation of mitotic cell cycle phase transition | 10 of 4104 in the list | 10 of 8404 in the genome | 0.83752 | CCG004331.1,CCG009521.1,CCG013849.1,CCG027068.1,CCG017923.1,CCG009035.1,CCG002269.1,CCG012743.1,CCG026404.1,CCG018116.1                                                                                                                                                                                                                                                                                                                                                                                      |
| GO:0006364 | rRNA processing                                   | 21 of 4104 in the list | 26 of 8404 in the genome | 0.90572 | CCG023263.1,CCG020286.1,CCG002735.1,CCG027579.1,CCG007962.1,CCG018636.1,CCG006357.1,CCG023511.1,CCG005097.1,CCG005849.1,CCG019953.1,CCG014824.1,CCG009214.1,CCG003055.1,CCG016274.1,CCG023053.1,CCG007636.1,CCG005176.1,CCG016760.1,CCG018474.1,                                                                                                                                                                                                                                                             |
| GO:0006470 | protein dephosphorylation                         | 41 of 4104 in the list | 59 of 8404 in the genome | 1       | CCG002156.2,CCG024246.1,CCG007874.3,CCG021496.1,CCG012754.1,CCG009398.1,CCG013128.1,CCG021269.1,CCG004212.1,CCG008194.1,CCG020010.1,CCG026143.1,CCG011382.1,CCG002687.2,CCG004101.1,CCG022627.1,CCG015077.1,CCG016460.1,CCG000839.1,CCG027539.1,CCG007485.1,CCG001788.1,CCG001051.1,CCG003693.1,CCG013101.1,CCG007177.1,CCG028615.1,CCG003362.1,CCG026300.1,CCG013007.1,CCG006691.1,CCG002105.1,CCG006884.1,CCG021369.1,CCG014945.1,CCG000926.1,CCG018688.1,CCG010776.1,CCG020055.1,CCG012377.1,CCG006010.1, |
| GO:0051726 | regulation of cell cycle                          | 29 of 4104 in the list | 39 of 8404 in the genome | 1       | CCG013849.1,CCG027068.1,CCG008308.1,CCG028049.1,CCG006063.1,CCG017923.1,CCG026888.1,CCG001795.1,CCG013274.1,CCG012743.1,CCG004783.1,CCG027441.1,CCG018116.1,CCG005849.1,CCG004331.1,CCG009521.1,CCG000116.1,CCG009035.1,CCG004682.1,CCG001794.1,CCG001854.1,CCG016760.1,CCG002269.1,CCG020898.1,CCG013794.1,CCG025057.1,CCG011648.1,CCG026404.1,                                                                                                                                                             |

|            |                                    |                         |                            |   |                                                                                                                                                                                                                                                                                                                                                                                                                                                                                                                                                                                                                                                                                                                                                                                                                                                                                                                                                                                                                                                                                                                                                                                                                                                                                                                                                                                                                                                                                                  |
|------------|------------------------------------|-------------------------|----------------------------|---|--------------------------------------------------------------------------------------------------------------------------------------------------------------------------------------------------------------------------------------------------------------------------------------------------------------------------------------------------------------------------------------------------------------------------------------------------------------------------------------------------------------------------------------------------------------------------------------------------------------------------------------------------------------------------------------------------------------------------------------------------------------------------------------------------------------------------------------------------------------------------------------------------------------------------------------------------------------------------------------------------------------------------------------------------------------------------------------------------------------------------------------------------------------------------------------------------------------------------------------------------------------------------------------------------------------------------------------------------------------------------------------------------------------------------------------------------------------------------------------------------|
| GO:0044267 | cellular protein metabolic process | 610 of 4104 in the list | 1150 of 8404 in the genome | 1 | CCG014531.2,CCG027068.1,CCG014396.1,CCG004887.1,CCG013430.1,CCG009878.1,CCG002687.2,CCG016952.1,CCG026174.1,CCG016238.1,CCG012726.1,CCG025472.1,CCG018432.1,CCG017266.1,CCG028198.1,CCG016689.2,CCG021479.1,CCG003362.1,CCG026300.1,CCG023381.1,CCG019735.1,CCG026413.3,CCG016271.1,CCG026871.2,CCG012077.1,CCG008381.1,CCG021616.1,CCG005738.1,CCG013876.1,CCG008270.1,CCG008301.1,CCG017984.1,CCG024612.1,CCG005737.1,CCG027636.1,CCG026212.1,CCG004569.1,CCG024139.1,CCG008040.1,CCG002156.2,CCG013109.1,CCG011238.1,CCG011949.1,CCG006465.1,CCG015074.1,CCG004212.1,CCG003248.1,CCG019571.1,CCG008871.1,CCG004331.1,CCG018788.1,CCG018494.1,CCG002982.1,CCG012083.1,CCG001311.1,CCG026602.1,CCG006344.1,CCG016480.1,CCG022627.1,CCG007457.1,CCG021737.1,CCG012332.1,CCG002957.1,CCG024897.1,CCG000552.1,CCG002966.1,CCG019545.1,CCG022056.1,CCG001876.1,CCG015186.1,CCG016327.2,CCG018688.1,CCG023458.1,CCG027748.1,CCG027943.1,CCG000294.1,CCG003520.1,CCG006928.1,CCG016738.2,CCG017381.1,CCG003554.1,CCG007874.3,CCG001704.1,CCG015367.1,CCG013640.1,CCG008404.1,CCG018201.1,CCG007766.1,CCG021179.1,CCG001108.1,CCG009574.1,CCG022370.1,CCG018164.1,CCG010112.1,CCG009038.1,CCG007750.2,CCG025707.1,CCG028092.1,CCG020078.1,CCG021521.1,CCG019139.1,CCG024922.1,CCG015580.1,CCG027000.1,CCG006804.1,CCG018168.1,CCG006264.1,CCG019426.1,CCG025889.1,CCG024790.1,CCG007254.1,CCG009394.1,CCG023684.1,CCG024760.1,CCG009177.1,CCG014222.1,CCG001217.1,CCG000612.1,CCG025892.1,CCG021138.1, |
|------------|------------------------------------|-------------------------|----------------------------|---|--------------------------------------------------------------------------------------------------------------------------------------------------------------------------------------------------------------------------------------------------------------------------------------------------------------------------------------------------------------------------------------------------------------------------------------------------------------------------------------------------------------------------------------------------------------------------------------------------------------------------------------------------------------------------------------------------------------------------------------------------------------------------------------------------------------------------------------------------------------------------------------------------------------------------------------------------------------------------------------------------------------------------------------------------------------------------------------------------------------------------------------------------------------------------------------------------------------------------------------------------------------------------------------------------------------------------------------------------------------------------------------------------------------------------------------------------------------------------------------------------|



|            |                                        |                         |                           |   |                                                                                                                                                                                                                                                                                                                                                                                                                                                                                                                                                                                                                                                                                                                                                                                                                                                                                                                                                                                                                                                                                                                                                                                                                                                                                                                                                                                                                                                                                                  |
|------------|----------------------------------------|-------------------------|---------------------------|---|--------------------------------------------------------------------------------------------------------------------------------------------------------------------------------------------------------------------------------------------------------------------------------------------------------------------------------------------------------------------------------------------------------------------------------------------------------------------------------------------------------------------------------------------------------------------------------------------------------------------------------------------------------------------------------------------------------------------------------------------------------------------------------------------------------------------------------------------------------------------------------------------------------------------------------------------------------------------------------------------------------------------------------------------------------------------------------------------------------------------------------------------------------------------------------------------------------------------------------------------------------------------------------------------------------------------------------------------------------------------------------------------------------------------------------------------------------------------------------------------------|
| GO:0019438 | aromatic compound biosynthetic process | 155 of 4104 in the list | 267 of 8404 in the genome | 1 | CCG000158.1,CCG017812.1,CCG006211.1,CCG016968.1,CCG017331.1,CCG021944.1,CCG010647.1,CCG005846.1,CCG025989.2,CCG021335.1,CCG011129.1,CCG026882.1,CCG025493.1,CCG018507.1,CCG015039.1,CCG026174.1,CCG000016.1,CCG026473.1,CCG001292.1,CCG002470.1,CCG006164.1,CCG018617.1,CCG020377.1,CCG008027.1,CCG026536.1,CCG006686.1,CCG007993.1,CCG023780.2,CCG007856.1,CCG018719.1,CCG005053.1,CCG008609.1,CCG010944.1,CCG027115.1,CCG021110.1,CCG020129.1,CCG015746.1,CCG020286.1,CCG020044.1,CCG023640.1,CCG001477.1,CCG021086.2,CCG006767.1,CCG019296.1,CCG000824.1,CCG025348.1,CCG019619.1,CCG014840.1,CCG015694.1,CCG006484.1,CCG018326.1,CCG028131.1,CCG023775.1,CCG010509.1,CCG011083.1,CCG010510.1,CCG019541.1,CCG010650.1,CCG010460.1,CCG024624.1,CCG024392.1,CCG009894.1,CCG015410.1,CCG011710.1,CCG009142.1,CCG011384.1,CCG026898.1,CCG023452.1,CCG009805.2,CCG010175.1,CCG014116.1,CCG003142.1,CCG013610.1,CCG003173.1,CCG009518.1,CCG023125.1,CCG024200.1,CCG016776.1,CCG016381.1,CCG006791.1,CCG000468.1,CCG026865.1,CCG004926.1,CCG026047.1,CCG007155.1,CCG007610.1,CCG011491.1,CCG006529.1,CCG007533.1,CCG008422.1,CCG018164.1,CCG004224.1,CCG000489.1,CCG010112.1,CCG000209.1,CCG021521.1,CCG020441.1,CCG013643.1,CCG023184.1,CCG021940.1,CCG002038.1,CCG010561.1,CCG013174.1,CCG018168.1,CCG019333.1,CCG018453.1,CCG000148.1,CCG013365.1,CCG025691.1,CCG018796.1,CCG005924.2,CCG027401.1,CCG027950.1,CCG018243.1,CCG024597.1,CCG004257.1,CCG017330.1,CCG021934.1,CCG010319.1,CCG014379.1, |
|------------|----------------------------------------|-------------------------|---------------------------|---|--------------------------------------------------------------------------------------------------------------------------------------------------------------------------------------------------------------------------------------------------------------------------------------------------------------------------------------------------------------------------------------------------------------------------------------------------------------------------------------------------------------------------------------------------------------------------------------------------------------------------------------------------------------------------------------------------------------------------------------------------------------------------------------------------------------------------------------------------------------------------------------------------------------------------------------------------------------------------------------------------------------------------------------------------------------------------------------------------------------------------------------------------------------------------------------------------------------------------------------------------------------------------------------------------------------------------------------------------------------------------------------------------------------------------------------------------------------------------------------------------|

|            |                                       |                        |                          |   |                                                                                                                                                                                                                                                                                                                                                                                                                                                                                                                                                                                                                                     |
|------------|---------------------------------------|------------------------|--------------------------|---|-------------------------------------------------------------------------------------------------------------------------------------------------------------------------------------------------------------------------------------------------------------------------------------------------------------------------------------------------------------------------------------------------------------------------------------------------------------------------------------------------------------------------------------------------------------------------------------------------------------------------------------|
| GO:0065009 | regulation of molecular function      | 51 of 4104 in the list | 77 of 8404 in the genome | 1 | CCG016454.1,CCG021442.1,CCG022083.1,CCG025433.1,CCG011044.1,CCG012519.1,CCG004132.1,CCG017369.1,CCG013274.1,CCG012743.1,CCG024000.1,CCG016965.1,CCG022676.1,CCG027878.1,CCG004151.1,CCG009450.1,CCG024809.1,CCG009024.1,CCG009521.1,CCG015333.1,CCG002971.1,CCG009035.1,CCG004682.1,CCG001854.1,CCG002109.1,CCG021151.1,CCG020898.1,CCG013794.1,CCG005105.1,CCG026404.1,CCG022394.1,CCG009894.1,CCG016027.1,CCG011341.1,CCG013849.1,CCG019462.1,CCG028049.1,CCG017923.1,CCG017560.1,CCG025554.1,CCG004783.1,CCG013303.1,CCG007631.1,CCG016181.1,CCG013203.1,CCG018776.1,CCG010260.1,CCG002864.1,CCG011648.1,CCG018184.1,CCG021704.1 |
| GO:0000226 | microtubule cytoskeleton organization | 18 of 4104 in the list | 22 of 8404 in the genome | 1 | CCG015570.1,CCG026688.1,CCG015784.1,CCG026823.1,CCG023682.1,CCG019140.1,CCG000535.1,CCG022536.3,CCG019028.1,CCG027167.1,CCG019029.1,CCG021448.1,CCG002137.1,CCG019092.1,CCG024421.3,CCG010538.1,                                                                                                                                                                                                                                                                                                                                                                                                                                    |
| GO:0008380 | RNA splicing                          | 18 of 4104 in the list | 22 of 8404 in the genome | 1 | CCG003785.1,CCG000939.1,CCG000393.1,CCG000754.1,CCG028285.1,CCG004008.1,CCG026516.1,CCG010792.1,CCG004927.1,CCG009393.1,CCG000183.1,CCG000583.2,CCG023686.1,CCG024810.1,CCG013802.1,CCG003938.1,                                                                                                                                                                                                                                                                                                                                                                                                                                    |
| GO:0006560 | proline metabolic process             | 9 of 4104 in the list  | 9 of 8404 in the genome  | 1 | CCG017111.1,CCG007203.1,CCG017894.1,CCG002231.1,CCG016220.1,CCG015921.1,CCG001423.1,CCG003871.1,                                                                                                                                                                                                                                                                                                                                                                                                                                                                                                                                    |
| GO:0043414 | macromolecule methylation             | 16 of 4104 in the list | 19 of 8404 in the genome | 1 | CCG014335.1,CCG012083.1,CCG002946.1,CCG001369.2,CCG008401.1,CCG026248.1,CCG023156.1,CCG009425.1,CCG021449.1,CCG025991.2,CCG003755.1,CCG022674.1,CCG004234.1,CCG017176.1,CCG015398.1,CCG025942.1                                                                                                                                                                                                                                                                                                                                                                                                                                     |

|            |                                    |                        |                          |   |                                                                                                                                                                                                                                                                                                                                                                                                                                                                                                                                                                                                                                                                                                 |
|------------|------------------------------------|------------------------|--------------------------|---|-------------------------------------------------------------------------------------------------------------------------------------------------------------------------------------------------------------------------------------------------------------------------------------------------------------------------------------------------------------------------------------------------------------------------------------------------------------------------------------------------------------------------------------------------------------------------------------------------------------------------------------------------------------------------------------------------|
| GO:1901605 | alpha-amino acid metabolic process | 56 of 4104 in the list | 86 of 8404 in the genome | 1 | CCG007203.1,CCG010174.2,CCG019954.3,CCG025465.1,CCG010111.1,CCG011491.1,CCG015921.1,CCG009333.1,CCG021923.1,CCG020154.1,CCG023501.1,CCG009084.2,CCG025108.1,CCG028131.1,CCG017894.1,CCG011721.1,CCG013043.1,CCG008510.1,CCG016220.1,CCG019834.1,CCG015568.1,CCG016315.1,CCG020441.1,CCG006059.1,CCG017543.1,CCG006821.1,CCG000682.1,CCG008932.1,CCG010561.1,CCG025307.1,CCG018907.1,CCG001423.1,CCG027551.3,CCG000472.1,CCG022025.2,CCG025636.2,CCG008860.1,CCG017201.1,CCG017111.1,CCG006994.1,CCG025731.1,CCG015276.2,CCG011789.1,CCG022773.2,CCG001082.1,CCG024133.1,CCG002231.1,CCG011722.1,CCG015943.1,CCG026030.1,CCG026155.1,CCG003063.1,CCG025897.1,CCG003871.1,CCG015567.1,CCG008388.1 |
|------------|------------------------------------|------------------------|--------------------------|---|-------------------------------------------------------------------------------------------------------------------------------------------------------------------------------------------------------------------------------------------------------------------------------------------------------------------------------------------------------------------------------------------------------------------------------------------------------------------------------------------------------------------------------------------------------------------------------------------------------------------------------------------------------------------------------------------------|

|            |                                              |                         |                           |   |                                                                                                                                                                                                                                                                                                                                                                                                                                                                                                                                                                                                                                                                                                                                                                                                                                                                                                                                                                                                                                                                                                                                                                                                                                                                                                                                                  |
|------------|----------------------------------------------|-------------------------|---------------------------|---|--------------------------------------------------------------------------------------------------------------------------------------------------------------------------------------------------------------------------------------------------------------------------------------------------------------------------------------------------------------------------------------------------------------------------------------------------------------------------------------------------------------------------------------------------------------------------------------------------------------------------------------------------------------------------------------------------------------------------------------------------------------------------------------------------------------------------------------------------------------------------------------------------------------------------------------------------------------------------------------------------------------------------------------------------------------------------------------------------------------------------------------------------------------------------------------------------------------------------------------------------------------------------------------------------------------------------------------------------|
| GO:0006520 | cellular amino acid metabolic process        | 114 of 4104 in the list | 192 of 8404 in the genome | 1 | CCG021774.1,CCG010174.2,CCG019078.1,CCG023277.1,CCG014396.1,CCG015367.1,CCG010191.3,CCG010111.1,CCG011491.1,CCG009878.1,CCG009333.1,CCG021923.1,CCG006188.1,CCG023501.1,CCG027352.3,CCG015950.3,CCG025108.1,CCG016238.1,CCG011135.1,CCG028092.1,CCG013727.1,CCG019834.1,CCG016220.1,CCG015568.1,CCG020441.1,CCG027607.1,CCG010561.1,CCG026910.1,CCG010321.1,CCG025307.1,CCG008776.1,CCG018907.1,CCG001423.1,CCG017344.1,CCG000138.1,CCG027551.3,CCG000472.1,CCG015577.3,CCG022025.2,CCG008860.1,CCG006994.1,CCG025731.1,CCG018108.1,CCG001082.1,CCG026099.1,CCG024133.1,CCG011722.1,CCG026030.1,CCG003063.1,CCG025897.1,CCG000414.1,CCG002018.1,CCG007203.1,CCG020877.1,CCG006231.1,CCG008321.1,CCG019954.3,CCG025465.1,CCG001811.1,CCG015921.1,CCG017708.1,CCG004949.1,CCG020154.1,CCG005938.1,CCG009084.2,CCG005204.1,CCG028131.1,CCG017894.1,CCG011721.1,CCG013043.1,CCG008510.1,CCG022407.1,CCG021716.1,CCG021820.1,CCG016315.1,CCG021610.1,CCG006059.1,CCG006570.1,CCG002662.1,CCG000352.1,CCG014436.2,CCG017543.1,CCG006821.1,CCG019243.1,CCG000682.1,CCG023315.1,CCG008932.1,CCG002897.1,CCG003528.1,CCG025439.1,CCG010565.1,CCG025636.2,CCG017201.1,CCG017111.1,CCG015276.2,CCG003296.1,CCG011789.1,CCG019545.1,CCG022773.2,CCG019330.1,CCG022269.1,CCG001876.1,CCG002231.1,CCG026570.1,CCG015943.1,CCG016955.1,CCG026155.1,CCG008789.1, |
| GO:0009142 | nucleoside triphosphate biosynthetic process | 19 of 4104 in the list  | 24 of 8404 in the genome  | 1 | CCG015410.1,CCG002038.1,CCG025107.1,CCG009142.1,CCG017995.1,CCG023640.1,CCG000148.1,CCG006529.1,CCG025348.1,CCG025989.2,CCG019619.1,CCG005924.2,CCG008422.1,CCG010112.1,CCG007417.1,CCG021110.1,CCG007724.1,CCG021934.1,CCG013643.1                                                                                                                                                                                                                                                                                                                                                                                                                                                                                                                                                                                                                                                                                                                                                                                                                                                                                                                                                                                                                                                                                                              |

|            |                                                         |                        |                          |   |                                                                                                                                                                                                                                     |
|------------|---------------------------------------------------------|------------------------|--------------------------|---|-------------------------------------------------------------------------------------------------------------------------------------------------------------------------------------------------------------------------------------|
| GO:0009145 | purine nucleoside triphosphate biosynthetic process     | 19 of 4104 in the list | 24 of 8404 in the genome | 1 | CCG015410.1,CCG002038.1,CCG025107.1,CCG009142.1,CCG017995.1,CCG023640.1,CCG000148.1,CCG006529.1,CCG025348.1,CCG025989.2,CCG019619.1,CCG005924.2,CCG008422.1,CCG010112.1,CCG007417.1,CCG021110.1,CCG007724.1,CCG021934.1,CCG013643.1 |
| GO:0009201 | ribonucleoside triphosphate biosynthetic process        | 19 of 4104 in the list | 24 of 8404 in the genome | 1 | CCG015410.1,CCG002038.1,CCG025107.1,CCG009142.1,CCG017995.1,CCG023640.1,CCG000148.1,CCG006529.1,CCG025348.1,CCG025989.2,CCG019619.1,CCG005924.2,CCG008422.1,CCG010112.1,CCG007417.1,CCG021110.1,CCG007724.1,CCG021934.1,CCG013643.1 |
| GO:0009206 | purine ribonucleoside triphosphate biosynthetic process | 19 of 4104 in the list | 24 of 8404 in the genome | 1 | CCG015410.1,CCG002038.1,CCG025107.1,CCG009142.1,CCG017995.1,CCG023640.1,CCG000148.1,CCG006529.1,CCG025348.1,CCG025989.2,CCG019619.1,CCG005924.2,CCG008422.1,CCG010112.1,CCG007417.1,CCG021110.1,CCG007724.1,CCG021934.1,CCG013643.1 |

|            |                         |                        |                           |   |                                                                                                                                                                                                                                                                                                                                                                                                                                                                                                                                                                                                                                                                                                                                                                                                                                                                                                                                                                                                                                                                                                  |
|------------|-------------------------|------------------------|---------------------------|---|--------------------------------------------------------------------------------------------------------------------------------------------------------------------------------------------------------------------------------------------------------------------------------------------------------------------------------------------------------------------------------------------------------------------------------------------------------------------------------------------------------------------------------------------------------------------------------------------------------------------------------------------------------------------------------------------------------------------------------------------------------------------------------------------------------------------------------------------------------------------------------------------------------------------------------------------------------------------------------------------------------------------------------------------------------------------------------------------------|
| GO:0051276 | chromosome organization | 93 of 4104 in the list | 154 of 8404 in the genome | 1 | CCG006899.1,CCG006211.1,CCG004973.1,CCG003361.1,CCG011675.1,CCG019284.1,CCG008560.1,CCG010136.1,CCG021491.1,CCG010647.1,CCG003310.1,CCG013617.1,CCG000433.1,CCG026473.1,CCG012476.1,CCG014537.1,CCG010137.1,CCG013028.1,CCG005194.1,CCG009461.1,CCG024623.1,CCG025880.1,CCG014836.1,CCG010904.1,CCG024177.1,CCG018482.1,CCG004481.1,CCG006686.1,CCG012514.1,CCG027196.1,CCG014772.1,CCG000575.1,CCG026474.1,CCG025893.1,CCG015167.1,CCG009637.1,CCG010905.1,CCG022456.1,CCG026579.1,CCG010909.1,CCG010648.1,CCG017580.1,CCG009980.1,CCG027348.1,CCG020863.1,CCG010906.1,CCG015968.1,CCG018893.1,CCG010649.1,CCG010138.1,CCG025877.1,CCG018767.1,CCG008892.2,CCG020987.1,CCG015560.1,CCG027199.1,CCG027198.1,CCG018326.1,CCG012083.1,CCG000587.1,CCG001369.2,CCG008559.1,CCG018287.1,CCG027696.1,CCG010907.1,CCG025991.2,CCG012229.1,CCG010650.1,CCG000708.1,CCG025990.1,CCG024624.1,CCG009275.1,CCG004494.1,CCG002947.1,CCG010908.1,CCG005716.1,CCG027197.1,CCG022673.1,CCG026159.1,CCG027697.1,CCG020442.1,CCG010646.1,CCG015398.1,CCG017598.1,CCG001810.1,CCG024787.1,CCG027695.1,CCG001913.1, |
|------------|-------------------------|------------------------|---------------------------|---|--------------------------------------------------------------------------------------------------------------------------------------------------------------------------------------------------------------------------------------------------------------------------------------------------------------------------------------------------------------------------------------------------------------------------------------------------------------------------------------------------------------------------------------------------------------------------------------------------------------------------------------------------------------------------------------------------------------------------------------------------------------------------------------------------------------------------------------------------------------------------------------------------------------------------------------------------------------------------------------------------------------------------------------------------------------------------------------------------|

|            |                                 |                         |                           |   |                                                                                                                                                                                                                                                                                                                                                                                                                                                                                                                                                                                                                                                                                                                                                                                                                                                                                                                                                                                                                                                                                                                                                                                                                                                                                                                                                                                                                                                                                                  |
|------------|---------------------------------|-------------------------|---------------------------|---|--------------------------------------------------------------------------------------------------------------------------------------------------------------------------------------------------------------------------------------------------------------------------------------------------------------------------------------------------------------------------------------------------------------------------------------------------------------------------------------------------------------------------------------------------------------------------------------------------------------------------------------------------------------------------------------------------------------------------------------------------------------------------------------------------------------------------------------------------------------------------------------------------------------------------------------------------------------------------------------------------------------------------------------------------------------------------------------------------------------------------------------------------------------------------------------------------------------------------------------------------------------------------------------------------------------------------------------------------------------------------------------------------------------------------------------------------------------------------------------------------|
| GO:0016043 | cellular component organization | 183 of 4104 in the list | 323 of 8404 in the genome | 1 | CCG006420.1,CCG018832.1,CCG006211.1,CCG004973.1,CCG013000.1,CCG026823.1,CCG003361.1,CCG011675.1,CCG010647.1,CCG019356.1,CCG020949.1,CCG005370.1,CCG019028.1,CCG007941.1,CCG026473.1,CCG012476.1,CCG002696.1,CCG014817.2,CCG014537.1,CCG003587.1,CCG013028.1,CCG027236.1,CCG019217.1,CCG024028.1,CCG005194.1,CCG024623.1,CCG014836.1,CCG015767.2,CCG024177.1,CCG000614.1,CCG009641.1,CCG004481.1,CCG006686.1,CCG012514.1,CCG027196.1,CCG000575.1,CCG002099.1,CCG016370.1,CCG014318.1,CCG010792.1,CCG003485.1,CCG025893.1,CCG010905.1,CCG022456.1,CCG006714.1,CCG027899.1,CCG010538.1,CCG010909.1,CCG018647.1,CCG017580.1,CCG015784.1,CCG009980.1,CCG023682.1,CCG015968.1,CCG013509.1,CCG019140.1,CCG018893.1,CCG010649.1,CCG025877.1,CCG018767.1,CCG020987.1,CCG015560.1,CCG002366.1,CCG009080.1,CCG027198.1,CCG009089.1,CCG027167.1,CCG000469.1,CCG025396.1,CCG000587.1,CCG012083.1,CCG018326.1,CCG019029.1,CCG008559.1,CCG019082.1,CCG027696.1,CCG021448.1,CCG010650.1,CCG000708.1,CCG025990.1,CCG024624.1,CCG009543.1,CCG004494.1,CCG015289.1,CCG010908.1,CCG005716.1,CCG022673.1,CCG026159.1,CCG009582.1,CCG015398.1,CCG020442.1,CCG020806.1,CCG001810.1,CCG002852.1,CCG024787.1,CCG000915.1,CCG012584.1,CCG021366.1,CCG000834.1,CCG018859.3,CCG008302.1,CCG019092.1,CCG024788.1,CCG015570.1,CCG006899.1,CCG002479.1,CCG019284.1,CCG008560.1,CCG021491.1,CCG010136.1,CCG003310.1,CCG009243.1,CCG013617.1,CCG000433.1,CCG010137.1,CCG020315.1,CCG009461.1,CCG011262.1,CCG023963.3,CCG006421.1, |
| GO:0001522 | pseudouridine synthesis         | 11 of 4104 in the list  | 12 of 8404 in the genome  | 1 | CCG014946.1,CCG000540.1,CCG019292.1,CCG020589.1,CCG011971.1,CCG019389.1,CCG016652.1,CCG002792.1,CCG028653.1,CCG018019.1,CCG016557.1                                                                                                                                                                                                                                                                                                                                                                                                                                                                                                                                                                                                                                                                                                                                                                                                                                                                                                                                                                                                                                                                                                                                                                                                                                                                                                                                                              |

|            |                                            |                        |                          |   |                                                                                                                                                                                                                                                                                                                                                                                                                                                                                                                                                                                                                                                 |
|------------|--------------------------------------------|------------------------|--------------------------|---|-------------------------------------------------------------------------------------------------------------------------------------------------------------------------------------------------------------------------------------------------------------------------------------------------------------------------------------------------------------------------------------------------------------------------------------------------------------------------------------------------------------------------------------------------------------------------------------------------------------------------------------------------|
| GO:0019220 | regulation of phosphate metabolic process  | 53 of 4104 in the list | 82 of 8404 in the genome | 1 | CCG016454.1,CCG021442.1,CCG022083.1,CCG025433.1,CCG012519.1,CCG004132.1,CCG028409.1,CCG017369.1,CCG013274.1,CCG024695.1,CCG012743.1,CCG024000.1,CCG016965.1,CCG022676.1,CCG027878.1,CCG009450.1,CCG024809.1,CCG009024.1,CCG009521.1,CCG015333.1,CCG002971.1,CCG009035.1,CCG004682.1,CCG001854.1,CCG002109.1,CCG021151.1,CCG020898.1,CCG013794.1,CCG005105.1,CCG026404.1,CCG022394.1,CCG016027.1,CCG011341.1,CCG013849.1,CCG019462.1,CCG028049.1,CCG002823.1,CCG017923.1,CCG000890.1,CCG017560.1,CCG004783.1,CCG025554.1,CCG013303.1,CCG007631.1,CCG016181.1,CCG013203.1,CCG018776.1,CCG010260.1,CCG011162.1,CCG002864.1,CCG011648.1,CCG018184.1 |
| GO:0051174 | regulation of phosphorus metabolic process | 53 of 4104 in the list | 82 of 8404 in the genome | 1 | CCG016454.1,CCG021442.1,CCG022083.1,CCG025433.1,CCG012519.1,CCG004132.1,CCG028409.1,CCG017369.1,CCG013274.1,CCG024695.1,CCG012743.1,CCG024000.1,CCG016965.1,CCG022676.1,CCG027878.1,CCG009450.1,CCG024809.1,CCG009024.1,CCG009521.1,CCG015333.1,CCG002971.1,CCG009035.1,CCG004682.1,CCG001854.1,CCG002109.1,CCG021151.1,CCG020898.1,CCG013794.1,CCG005105.1,CCG026404.1,CCG022394.1,CCG016027.1,CCG011341.1,CCG013849.1,CCG019462.1,CCG028049.1,CCG002823.1,CCG017923.1,CCG000890.1,CCG017560.1,CCG004783.1,CCG025554.1,CCG013303.1,CCG007631.1,CCG016181.1,CCG013203.1,CCG018776.1,CCG010260.1,CCG011162.1,CCG002864.1,CCG011648.1,CCG018184.1 |
| GO:0006754 | ATP biosynthetic process                   | 15 of 4104 in the list | 18 of 8404 in the genome | 1 | CCG015410.1,CCG002038.1,CCG025107.1,CCG010112.1,CCG009142.1,CCG023640.1,CCG000148.1,CCG025348.1,CCG007724.1,CCG025989.2,CCG021934.1,CCG019619.1,CCG005924.2,CCG013643.1,CCG008422.1                                                                                                                                                                                                                                                                                                                                                                                                                                                             |



|            |                                  |                        |                          |   |                                                                                                                                                                                                                                                                                                                                                                                                                                                                                                                                                                                                 |
|------------|----------------------------------|------------------------|--------------------------|---|-------------------------------------------------------------------------------------------------------------------------------------------------------------------------------------------------------------------------------------------------------------------------------------------------------------------------------------------------------------------------------------------------------------------------------------------------------------------------------------------------------------------------------------------------------------------------------------------------|
| GO:0050790 | regulation of catalytic activity | 49 of 4104 in the list | 75 of 8404 in the genome | 1 | CCG016454.1,CCG021442.1,CCG022083.1,CCG025433.1,CCG011044.1,CCG012519.1,CCG004132.1,CCG017369.1,CCG013274.1,CCG012743.1,CCG024000.1,CCG016965.1,CCG022676.1,CCG027878.1,CCG009450.1,CCG024809.1,CCG009024.1,CCG009521.1,CCG015333.1,CCG002971.1,CCG009035.1,CCG004682.1,CCG001854.1,CCG002109.1,CCG021151.1,CCG020898.1,CCG013794.1,CCG005105.1,CCG026404.1,CCG022394.1,CCG016027.1,CCG011341.1,CCG013849.1,CCG019462.1,CCG028049.1,CCG017923.1,CCG017560.1,CCG025554.1,CCG004783.1,CCG013303.1,CCG007631.1,CCG016181.1,CCG013203.1,CCG018776.1,CCG010260.1,CCG002864.1,CCG011648.1,CCG018184.1 |
|------------|----------------------------------|------------------------|--------------------------|---|-------------------------------------------------------------------------------------------------------------------------------------------------------------------------------------------------------------------------------------------------------------------------------------------------------------------------------------------------------------------------------------------------------------------------------------------------------------------------------------------------------------------------------------------------------------------------------------------------|

|            |                             |                         |                           |   |                                                                                                                                                                                                                                                                                                                                                                                                                                                                                                                                                                                                                                                                                                                                                                                                                                                                                                                                                                                                                                                                                                                                                                                                                                                                                                                                                                                                                                                                                                                                                                                                                      |
|------------|-----------------------------|-------------------------|---------------------------|---|----------------------------------------------------------------------------------------------------------------------------------------------------------------------------------------------------------------------------------------------------------------------------------------------------------------------------------------------------------------------------------------------------------------------------------------------------------------------------------------------------------------------------------------------------------------------------------------------------------------------------------------------------------------------------------------------------------------------------------------------------------------------------------------------------------------------------------------------------------------------------------------------------------------------------------------------------------------------------------------------------------------------------------------------------------------------------------------------------------------------------------------------------------------------------------------------------------------------------------------------------------------------------------------------------------------------------------------------------------------------------------------------------------------------------------------------------------------------------------------------------------------------------------------------------------------------------------------------------------------------|
| GO:0055114 | oxidation-reduction process | 458 of 4104 in the list | 859 of 8404 in the genome | 1 | CCG006974.1,CCG017633.1,CCG012202.1,CCG019078.1,<br>CCG000520.1,CCG014901.1,CCG000184.1,CCG018055.1,<br>CCG015926.1,CCG019182.1,CCG020913.1,CCG003729.1,<br>CCG004595.1,CCG025108.1,CCG015758.1,CCG009904.1,<br>CCG020879.1,CCG006391.1,CCG016220.1,CCG010284.1,<br>CCG017981.1,CCG013059.1,CCG025836.1,CCG012949.1,<br>CCG020804.1,CCG006639.1,CCG024297.1,CCG012578.1,<br>CCG007424.2,CCG009496.1,CCG026536.1,CCG018943.2,<br>CCG010038.1,CCG025307.1,CCG013289.1,CCG007720.1,<br>CCG012579.1,CCG020956.1,CCG022067.1,CCG025346.1,<br>CCG017624.1,CCG000948.1,CCG020227.1,CCG022025.2,<br>CCG005053.1,CCG011237.1,CCG025833.1,CCG006994.1,<br>CCG024123.2,CCG015290.1,CCG000944.1,CCG007420.1,<br>CCG011722.1,CCG003063.1,CCG023245.1,CCG015331.1,<br>CCG019909.1,CCG015763.2,CCG015450.1,CCG018253.1,<br>CCG010179.1,CCG017162.1,CCG021468.1,CCG018255.1,<br>CCG020660.1,CCG018625.1,CCG011231.2,CCG013816.1,<br>CCG028131.1,CCG023451.1,CCG027557.1,CCG005913.1,<br>CCG009672.1,CCG024119.1,CCG007260.1,CCG018290.1,<br>CCG020911.1,CCG012339.1,CCG026670.1,CCG018257.1,<br>CCG022399.1,CCG027312.1,CCG017982.1,CCG011895.1,<br>CCG024532.1,CCG002113.1,CCG015133.1,CCG004434.1,<br>CCG011891.1,CCG017425.1,CCG000775.1,CCG017111.1,<br>CCG013610.1,CCG023940.1,CCG017979.1,CCG025827.1,<br>CCG008215.1,CCG014228.2,CCG002231.1,CCG008902.1,<br>CCG016900.1,CCG006972.1,CCG017116.1,CCG025096.1,<br>CCG025015.2,CCG018446.1,CCG019844.1,CCG026016.1,<br>CCG005588.1,CCG011547.1,CCG005162.1,CCG020414.1,<br>CCG015537.1,CCG011491.1,CCG005955.1,CCG008895.1,<br>CCG024878.1,CCG002783.1,CCG000391.1,CCG013575.1, |
|------------|-----------------------------|-------------------------|---------------------------|---|----------------------------------------------------------------------------------------------------------------------------------------------------------------------------------------------------------------------------------------------------------------------------------------------------------------------------------------------------------------------------------------------------------------------------------------------------------------------------------------------------------------------------------------------------------------------------------------------------------------------------------------------------------------------------------------------------------------------------------------------------------------------------------------------------------------------------------------------------------------------------------------------------------------------------------------------------------------------------------------------------------------------------------------------------------------------------------------------------------------------------------------------------------------------------------------------------------------------------------------------------------------------------------------------------------------------------------------------------------------------------------------------------------------------------------------------------------------------------------------------------------------------------------------------------------------------------------------------------------------------|

|            |                                               |                        |                          |   |                                                                                                                                                                                                                                                                                                                                                                                                                                                                                                                                                                                                                                                                                                                                                 |
|------------|-----------------------------------------------|------------------------|--------------------------|---|-------------------------------------------------------------------------------------------------------------------------------------------------------------------------------------------------------------------------------------------------------------------------------------------------------------------------------------------------------------------------------------------------------------------------------------------------------------------------------------------------------------------------------------------------------------------------------------------------------------------------------------------------------------------------------------------------------------------------------------------------|
| GO:0046578 | regulation of Ras protein signal transduction | 60 of 4104 in the list | 95 of 8404 in the genome | 1 | CCG016454.1,CCG021442.1,CCG022083.1,CCG006050.2,CCG025433.1,CCG021263.1,CCG012519.1,CCG026214.1,CCG004132.1,CCG017369.1,CCG009980.1,CCG010808.1,CCG009512.1,CCG025470.1,CCG022334.1,CCG008892.2,CCG024000.1,CCG016965.1,CCG022676.1,CCG027878.1,CCG024809.1,CCG009024.1,CCG015333.1,CCG010849.1,CCG003602.1,CCG004884.2,CCG022749.1,CCG002971.1,CCG018380.1,CCG002109.1,CCG018015.1,CCG010329.2,CCG021151.1,CCG005105.1,CCG001579.1,CCG021483.1,CCG028651.1,CCG022394.1,CCG016027.1,CCG011341.1,CCG019462.1,CCG008035.1,CCG000596.1,CCG019585.1,CCG025554.1,CCG013303.1,CCG012670.1,CCG007631.1,CCG025667.2,CCG016181.1,CCG013203.1,CCG018776.1,CCG022420.1,CCG009510.1,CCG021294.1,CCG010260.1,CCG010157.1,CCG002864.1,CCG020983.1,CCG011422.1 |
| GO:0006979 | response to oxidative stress                  | 18 of 4104 in the list | 23 of 8404 in the genome | 1 | CCG011122.1,CCG021071.1,CCG012274.1,CCG012273.2,CCG017425.1,CCG024878.1,CCG003364.1,CCG004145.1,CCG023940.1,CCG004723.1,CCG009672.1,CCG005913.1,CCG001530.1,CCG027211.1,CCG021072.1,CCG000409.1,                                                                                                                                                                                                                                                                                                                                                                                                                                                                                                                                                |
| GO:0016568 | chromatin modification                        | 18 of 4104 in the list | 23 of 8404 in the genome | 1 | CCG006899.1,CCG018482.1,CCG006686.1,CCG006211.1,CCG020863.1,CCG027348.1,CCG000575.1,CCG011675.1,CCG015398.1,CCG018326.1,CCG012083.1,CCG000587.1,CCG001913.1,CCG001369.2,CCG000122.1,CCG025991.2,                                                                                                                                                                                                                                                                                                                                                                                                                                                                                                                                                |
| GO:0006418 | tRNA aminoacylation for protein translation   | 44 of 4104 in the list | 67 of 8404 in the genome | 1 | CCG020877.1,CCG021774.1,CCG006231.1,CCG008321.1,CCG023277.1,CCG014396.1,CCG015367.1,CCG010191.3,CCG001811.1,CCG009878.1,CCG006188.1,CCG004949.1,CCG027352.3,CCG015950.3,CCG005204.1,CCG016238.1,CCG011135.1,CCG013727.1,CCG028092.1,CCG021716.1,CCG021820.1,CCG002662.1,CCG006570.1,CCG027607.1,CCG000352.1,CCG023315.1,CCG003528.1,CCG010321.1,CCG000138.1,CCG017344.1,CCG010565.1,CCG015577.3,CCG003296.1,CCG019545.1,CCG019330.1,CCG001876.1,CCG022269.1,CCG026570.1,CCG008789.1,CCG000414.1,CCG000019.1,CCG000519.1,CCG010000.1,CCG001500.1                                                                                                                                                                                                 |

|            |                       |                        |                          |   |                                                                                                                                                                                                                                                                                                                                                                                                                                                                                                                                                 |
|------------|-----------------------|------------------------|--------------------------|---|-------------------------------------------------------------------------------------------------------------------------------------------------------------------------------------------------------------------------------------------------------------------------------------------------------------------------------------------------------------------------------------------------------------------------------------------------------------------------------------------------------------------------------------------------|
| GO:0043038 | amino acid activation | 44 of 4104 in the list | 67 of 8404 in the genome | 1 | CCG020877.1,CCG021774.1,CCG006231.1,CCG008321.1,CCG023277.1,CCG014396.1,CCG015367.1,CCG010191.3,CCG001811.1,CCG009878.1,CCG006188.1,CCG004949.1,CCG027352.3,CCG015950.3,CCG005204.1,CCG016238.1,CCG011135.1,CCG013727.1,CCG028092.1,CCG021716.1,CCG021820.1,CCG002662.1,CCG006570.1,CCG027607.1,CCG000352.1,CCG023315.1,CCG003528.1,CCG010321.1,CCG000138.1,CCG017344.1,CCG010565.1,CCG015577.3,CCG003296.1,CCG019545.1,CCG019330.1,CCG001876.1,CCG022269.1,CCG026570.1,CCG008789.1,CCG000414.1,CCG000018.1,CCG000518.1,CCG010000.1,CCG004500.1 |
| GO:0043039 | tRNA aminoacylation   | 44 of 4104 in the list | 67 of 8404 in the genome | 1 | CCG020877.1,CCG021774.1,CCG006231.1,CCG008321.1,CCG023277.1,CCG014396.1,CCG015367.1,CCG010191.3,CCG001811.1,CCG009878.1,CCG006188.1,CCG004949.1,CCG027352.3,CCG015950.3,CCG005204.1,CCG016238.1,CCG011135.1,CCG013727.1,CCG028092.1,CCG021716.1,CCG021820.1,CCG002662.1,CCG006570.1,CCG027607.1,CCG000352.1,CCG023315.1,CCG003528.1,CCG010321.1,CCG000138.1,CCG017344.1,CCG010565.1,CCG015577.3,CCG003296.1,CCG019545.1,CCG019330.1,CCG001876.1,CCG022269.1,CCG026570.1,CCG008789.1,CCG000414.1,CCG000018.1,CCG000518.1,CCG010000.1,CCG004500.1 |

|            |                                          |                         |                           |   |                                                                                                                                                                                                                                                                                                                                                                                                                                                                                                                                                                                                                                                                                                                                                                                                                                                                                                                                                                                                                                                                                                                                                                                                                                                                                                                                                                                                                                                                                                  |
|------------|------------------------------------------|-------------------------|---------------------------|---|--------------------------------------------------------------------------------------------------------------------------------------------------------------------------------------------------------------------------------------------------------------------------------------------------------------------------------------------------------------------------------------------------------------------------------------------------------------------------------------------------------------------------------------------------------------------------------------------------------------------------------------------------------------------------------------------------------------------------------------------------------------------------------------------------------------------------------------------------------------------------------------------------------------------------------------------------------------------------------------------------------------------------------------------------------------------------------------------------------------------------------------------------------------------------------------------------------------------------------------------------------------------------------------------------------------------------------------------------------------------------------------------------------------------------------------------------------------------------------------------------|
| GO:0031323 | regulation of cellular metabolic process | 314 of 4104 in the list | 579 of 8404 in the genome | 1 | CCG016454.1,CCG021442.1,CCG022266.1,CCG003824.3,CCG008767.3,CCG008741.1,CCG024695.1,CCG003390.1,CCG027427.1,CCG007493.1,CCG002971.1,CCG021465.1,CCG003175.1,CCG004682.1,CCG023752.1,CCG018321.1,CCG028326.3,CCG013794.1,CCG006134.1,CCG009970.1,CCG011341.1,CCG019462.1,CCG016745.1,CCG021436.1,CCG016445.1,CCG012536.1,CCG000659.1,CCG027127.1,CCG018719.1,CCG015425.1,CCG027796.1,CCG022824.1,CCG018533.1,CCG024710.1,CCG022281.1,CCG011465.1,CCG018776.1,CCG006714.1,CCG020129.1,CCG027186.1,CCG011911.1,CCG004132.1,CCG000588.1,CCG022045.1,CCG013274.1,CCG028568.1,CCG022676.1,CCG007647.1,CCG024809.1,CCG021633.1,CCG012083.1,CCG000562.1,CCG005480.2,CCG017760.1,CCG016859.1,CCG005486.1,CCG020898.1,CCG017591.1,CCG002198.1,CCG021284.1,CCG016924.1,CCG013849.1,CCG000133.1,CCG013224.2,CCG002273.1,CCG001698.1,CCG023777.1,CCG014461.1,CCG026228.2,CCG005487.1,CCG021054.1,CCG016307.1,CCG009805.2,CCG016749.1,CCG028465.1,CCG019250.1,CCG005396.1,CCG025747.1,CCG009823.1,CCG021456.1,CCG014928.1,CCG005168.1,CCG018184.1,CCG018315.1,CCG027580.1,CCG025433.1,CCG024271.1,CCG012519.1,CCG028409.1,CCG025758.1,CCG009458.1,CCG022496.1,CCG015062.1,CCG024000.1,CCG016965.1,CCG018164.1,CCG015333.1,CCG001301.1,CCG023199.2,CCG001431.2,CCG001341.1,CCG022398.1,CCG021521.1,CCG009562.2,CCG010139.1,CCG021940.1,CCG024639.1,CCG015846.1,CCG008833.1,CCG018168.1,CCG014509.1,CCG004783.1,CCG025691.1,CCG018042.1,CCG014463.1,CCG026788.1,CCG020543.1,CCG025549.1,CCG011015.1,CCG027950.1, |
|------------|------------------------------------------|-------------------------|---------------------------|---|--------------------------------------------------------------------------------------------------------------------------------------------------------------------------------------------------------------------------------------------------------------------------------------------------------------------------------------------------------------------------------------------------------------------------------------------------------------------------------------------------------------------------------------------------------------------------------------------------------------------------------------------------------------------------------------------------------------------------------------------------------------------------------------------------------------------------------------------------------------------------------------------------------------------------------------------------------------------------------------------------------------------------------------------------------------------------------------------------------------------------------------------------------------------------------------------------------------------------------------------------------------------------------------------------------------------------------------------------------------------------------------------------------------------------------------------------------------------------------------------------|

|            |                                              |                         |                           |   |                                                                                                                                                                                                                                                                                                                                                                                                                                                                                                                                                                                                                                                                                                                                                                                                                                                                                                                                                                                                                                                                                                                                                                                                                                                                                                  |
|------------|----------------------------------------------|-------------------------|---------------------------|---|--------------------------------------------------------------------------------------------------------------------------------------------------------------------------------------------------------------------------------------------------------------------------------------------------------------------------------------------------------------------------------------------------------------------------------------------------------------------------------------------------------------------------------------------------------------------------------------------------------------------------------------------------------------------------------------------------------------------------------------------------------------------------------------------------------------------------------------------------------------------------------------------------------------------------------------------------------------------------------------------------------------------------------------------------------------------------------------------------------------------------------------------------------------------------------------------------------------------------------------------------------------------------------------------------|
| GO:1901566 | organonitrogen compound biosynthetic process | 109 of 4104 in the list | 186 of 8404 in the genome | 1 | CCG022191.1,CCG010174.2,CCG017331.1,CCG017175.1,CCG007610.1,CCG011491.1,CCG002555.1,CCG009333.1,CCG006529.1,CCG025989.2,CCG021335.1,CCG008422.1,CCG024517.1,CCG025493.1,CCG010112.1,CCG016220.1,CCG015568.1,CCG020441.1,CCG013643.1,CCG002495.1,CCG026536.1,CCG002038.1,CCG010561.1,CCG023780.2,CCG000148.1,CCG018453.1,CCG001423.1,CCG013365.1,CCG022025.2,CCG005924.2,CCG005053.1,CCG025940.1,CCG008860.1,CCG025731.1,CCG018108.1,CCG027282.1,CCG026099.1,CCG008609.1,CCG024133.1,CCG009515.2,CCG004257.1,CCG017330.1,CCG021110.1,CCG025897.1,CCG021934.1,CCG010319.1,CCG017559.1,CCG007203.1,CCG027212.1,CCG019954.3,CCG017995.1,CCG004180.1,CCG026752.1,CCG023640.1,CCG002556.1,CCG028391.1,CCG021086.2,CCG015921.1,CCG025348.1,CCG019619.1,CCG016005.1,CCG005938.1,CCG013999.1,CCG028131.1,CCG021336.1,CCG017894.1,CCG007417.1,CCG013043.1,CCG024432.2,CCG004440.1,CCG007724.1,CCG022072.1,CCG016315.1,CCG021610.1,CCG010460.1,CCG006821.1,CCG000682.1,CCG008932.1,CCG015410.1,CCG002897.1,CCG003865.1,CCG025107.1,CCG009142.1,CCG026898.1,CCG026812.1,CCG023452.1,CCG002883.1,CCG018659.2,CCG025636.2,CCG014116.1,CCG017201.1,CCG017111.1,CCG015276.2,CCG022773.2,CCG013610.1,CCG003173.1,CCG016614.1,CCG028305.1,CCG009518.1,CCG004188.3,CCG002231.1,CCG015943.1,CCG006791.1,CCG016955.1, |
| GO:0006096 | glycolysis                                   | 16 of 4104 in the list  | 20 of 8404 in the genome  | 1 | CCG022035.1,CCG020616.1,CCG005588.1,CCG003215.3,CCG010373.1,CCG007981.1,CCG007023.1,CCG022214.1,CCG000431.1,CCG013339.1,CCG019953.1,CCG017200.1,CCG003220.2,CCG006203.1,CCG022453.1,CCG025277.1                                                                                                                                                                                                                                                                                                                                                                                                                                                                                                                                                                                                                                                                                                                                                                                                                                                                                                                                                                                                                                                                                                  |
| GO:0006099 | tricarboxylic acid cycle                     | 16 of 4104 in the list  | 20 of 8404 in the genome  | 1 | CCG024798.1,CCG012727.1,CCG018128.1,CCG011547.1,CCG020956.1,CCG004244.1,CCG019712.1,CCG009771.2,CCG001842.1,CCG023350.1,CCG001072.1,CCG012249.1,CCG016431.1,CCG000089.1,CCG027631.1,CCG020707.1                                                                                                                                                                                                                                                                                                                                                                                                                                                                                                                                                                                                                                                                                                                                                                                                                                                                                                                                                                                                                                                                                                  |

|            |                                |                        |                           |   |                                                                                                                                                                                                                                                                                                                                                                                                                                                                                                                                                                                                                                                                                                                                                                                                                                                                                                                                                                                                                                                  |
|------------|--------------------------------|------------------------|---------------------------|---|--------------------------------------------------------------------------------------------------------------------------------------------------------------------------------------------------------------------------------------------------------------------------------------------------------------------------------------------------------------------------------------------------------------------------------------------------------------------------------------------------------------------------------------------------------------------------------------------------------------------------------------------------------------------------------------------------------------------------------------------------------------------------------------------------------------------------------------------------------------------------------------------------------------------------------------------------------------------------------------------------------------------------------------------------|
| GO:0009060 | aerobic respiration            | 16 of 4104 in the list | 20 of 8404 in the genome  | 1 | CCG024798.1,CCG012727.1,CCG018128.1,CCG011547.1,CCG020956.1,CCG004244.1,CCG019712.1,CCG009771.2,CCG001842.1,CCG023350.1,CCG001072.1,CCG012249.1,CCG016431.1,CCG000089.1,CCG027631.1,CCG020707.1                                                                                                                                                                                                                                                                                                                                                                                                                                                                                                                                                                                                                                                                                                                                                                                                                                                  |
| GO:0016052 | carbohydrate catabolic process | 21 of 4104 in the list | 28 of 8404 in the genome  | 1 | CCG022035.1,CCG020616.1,CCG005588.1,CCG003215.3,CCG025307.1,CCG010373.1,CCG007981.1,CCG007023.1,CCG022214.1,CCG000431.1,CCG013339.1,CCG009084.2,CCG019953.1,CCG017200.1,CCG006358.1,CCG003220.2,CCG006203.1,CCG005177.1,CCG022453.1,CCG025277.1,                                                                                                                                                                                                                                                                                                                                                                                                                                                                                                                                                                                                                                                                                                                                                                                                 |
| GO:0051258 | protein polymerization         | 21 of 4104 in the list | 28 of 8404 in the genome  | 1 | CCG006420.1,CCG009543.1,CCG015289.1,CCG013000.1,CCG013637.1,CCG016370.1,CCG010418.1,CCG005886.1,CCG005370.1,CCG009080.1,CCG010864.1,CCG002852.1,CCG009243.1,CCG025396.1,CCG007532.1,CCG007531.1,CCG002696.1,CCG018820.3,CCG008748.1,CCG023963.3,                                                                                                                                                                                                                                                                                                                                                                                                                                                                                                                                                                                                                                                                                                                                                                                                 |
| GO:0006325 | chromatin organization         | 88 of 4104 in the list | 147 of 8404 in the genome | 1 | CCG006899.1,CCG006211.1,CCG003361.1,CCG011675.1,CCG019284.1,CCG008560.1,CCG010136.1,CCG021491.1,CCG010647.1,CCG003310.1,CCG013617.1,CCG000433.1,CCG026473.1,CCG012476.1,CCG014537.1,CCG010137.1,CCG013028.1,CCG009461.1,CCG005194.1,CCG024623.1,CCG025880.1,CCG014836.1,CCG010904.1,CCG024177.1,CCG018482.1,CCG004481.1,CCG006686.1,CCG012514.1,CCG027196.1,CCG014772.1,CCG000575.1,CCG026474.1,CCG025893.1,CCG009637.1,CCG010905.1,CCG026579.1,CCG010909.1,CCG010648.1,CCG017580.1,CCG009980.1,CCG027348.1,CCG020863.1,CCG010906.1,CCG015968.1,CCG018893.1,CCG010138.1,CCG010649.1,CCG018767.1,CCG008892.2,CCG025877.1,CCG015560.1,CCG027199.1,CCG027198.1,CCG018326.1,CCG012083.1,CCG000587.1,CCG001369.2,CCG018287.1,CCG008559.1,CCG027696.1,CCG010907.1,CCG025991.2,CCG012229.1,CCG010650.1,CCG000708.1,CCG025990.1,CCG024624.1,CCG009275.1,CCG004494.1,CCG002947.1,CCG010908.1,CCG005716.1,CCG027197.1,CCG022673.1,CCG026159.1,CCG027697.1,CCG020442.1,CCG010646.1,CCG015398.1,CCG017598.1,CCG024787.1,CCG027695.1,CCG001913.1,CCG012584.1, |

|            |                                      |                         |                           |   |                                                                                                                                                                                                                                                                                                                                                                                                                                                                                                                                                                                                                                                                                                                                                                                                                                                                                                                                                                                                                                                                                                                                                                                                                                                                                                                                                  |
|------------|--------------------------------------|-------------------------|---------------------------|---|--------------------------------------------------------------------------------------------------------------------------------------------------------------------------------------------------------------------------------------------------------------------------------------------------------------------------------------------------------------------------------------------------------------------------------------------------------------------------------------------------------------------------------------------------------------------------------------------------------------------------------------------------------------------------------------------------------------------------------------------------------------------------------------------------------------------------------------------------------------------------------------------------------------------------------------------------------------------------------------------------------------------------------------------------------------------------------------------------------------------------------------------------------------------------------------------------------------------------------------------------------------------------------------------------------------------------------------------------|
| GO:0022904 | respiratory electron transport chain | 12 of 4104 in the list  | 14 of 8404 in the genome  | 1 | CCG004155.2,CCG023685.1,CCG000102.1,CCG020879.1,CCG018684.1,CCG001649.1,CCG014053.1,CCG006864.1,CCG006459.1,CCG025163.3,CCG024297.1,CCG011237.1                                                                                                                                                                                                                                                                                                                                                                                                                                                                                                                                                                                                                                                                                                                                                                                                                                                                                                                                                                                                                                                                                                                                                                                                  |
| GO:0044712 | single-organism catabolic process    | 115 of 4104 in the list | 198 of 8404 in the genome | 1 | CCG006420.1,CCG017420.1,CCG005588.1,CCG002549.1,CCG007060.1,CCG013000.1,CCG010373.1,CCG013766.1,CCG010111.1,CCG024327.1,CCG000591.1,CCG024092.1,CCG015386.1,CCG019020.1,CCG009243.1,CCG025108.1,CCG006358.1,CCG003220.2,CCG006203.1,CCG006391.1,CCG002925.1,CCG019834.1,CCG025387.1,CCG022453.1,CCG023005.1,CCG024375.1,CCG003748.1,CCG009607.1,CCG011006.1,CCG027119.1,CCG007827.1,CCG014434.1,CCG006421.1,CCG023963.3,CCG022035.1,CCG021990.1,CCG025027.1,CCG015949.1,CCG025307.1,CCG025521.1,CCG016370.1,CCG007023.1,CCG019103.1,CCG019629.2,CCG006311.1,CCG002917.1,CCG005147.1,CCG004988.1,CCG001082.1,CCG020909.1,CCG007532.1,CCG018447.1,CCG007531.1,CCG016966.1,CCG018820.3,CCG011722.1,CCG025277.1,CCG025179.1,CCG003063.1,CCG006777.1,CCG007203.1,CCG020616.1,CCG003215.3,CCG025973.1,CCG013637.1,CCG007981.1,CCG001440.1,CCG015351.1,CCG010418.1,CCG020154.1,CCG002366.1,CCG009080.1,CCG004869.1,CCG000431.1,CCG009084.2,CCG019953.1,CCG025396.1,CCG026953.1,CCG011721.1,CCG006924.1,CCG021220.1,CCG008510.1,CCG008748.1,CCG006059.1,CCG017543.1,CCG013641.1,CCG019243.1,CCG016027.1,CCG015289.1,CCG003495.1,CCG021411.1,CCG001859.1,CCG026336.1,CCG022214.1,CCG005886.1,CCG025131.2,CCG016542.1,CCG013339.1,CCG026154.1,CCG015654.1,CCG002852.1,CCG010864.1,CCG001445.1,CCG011789.1,CCG013765.1,CCG017200.1,CCG002231.1,CCG005177.1, |



|            |                                 |                         |                           |   |                                                                                                                                                                                                                                                                                                                                                                                                                                                                                                                                                                                                                                                                                                                                                                                                                                                                                                                                                                                                                                                                                                                                                                                                                                                                                                                                                                                                                                                                                                  |
|------------|---------------------------------|-------------------------|---------------------------|---|--------------------------------------------------------------------------------------------------------------------------------------------------------------------------------------------------------------------------------------------------------------------------------------------------------------------------------------------------------------------------------------------------------------------------------------------------------------------------------------------------------------------------------------------------------------------------------------------------------------------------------------------------------------------------------------------------------------------------------------------------------------------------------------------------------------------------------------------------------------------------------------------------------------------------------------------------------------------------------------------------------------------------------------------------------------------------------------------------------------------------------------------------------------------------------------------------------------------------------------------------------------------------------------------------------------------------------------------------------------------------------------------------------------------------------------------------------------------------------------------------|
| GO:0019222 | regulation of metabolic process | 317 of 4104 in the list | 587 of 8404 in the genome | 1 | CCG016454.1,CCG021442.1,CCG022266.1,CCG003824.3,CCG008767.3,CCG008741.1,CCG024695.1,CCG003390.1,CCG027427.1,CCG007493.1,CCG002971.1,CCG021465.1,CCG003175.1,CCG004682.1,CCG023752.1,CCG018321.1,CCG028326.3,CCG013794.1,CCG006134.1,CCG009970.1,CCG011341.1,CCG019462.1,CCG016745.1,CCG021436.1,CCG016445.1,CCG012536.1,CCG000659.1,CCG027127.1,CCG018719.1,CCG015425.1,CCG027796.1,CCG022824.1,CCG018533.1,CCG024710.1,CCG022281.1,CCG011465.1,CCG018776.1,CCG006714.1,CCG020129.1,CCG027186.1,CCG011911.1,CCG004132.1,CCG000588.1,CCG022045.1,CCG013274.1,CCG028568.1,CCG022676.1,CCG007647.1,CCG024809.1,CCG021633.1,CCG012083.1,CCG000562.1,CCG005480.2,CCG017760.1,CCG016859.1,CCG005486.1,CCG020898.1,CCG017591.1,CCG002198.1,CCG021284.1,CCG016924.1,CCG013849.1,CCG000133.1,CCG013224.2,CCG002273.1,CCG001698.1,CCG023777.1,CCG014461.1,CCG026228.2,CCG005487.1,CCG021054.1,CCG016307.1,CCG009805.2,CCG016749.1,CCG028465.1,CCG019250.1,CCG005396.1,CCG025747.1,CCG009823.1,CCG021456.1,CCG014928.1,CCG005168.1,CCG018184.1,CCG018315.1,CCG027580.1,CCG025433.1,CCG024271.1,CCG011044.1,CCG012519.1,CCG028409.1,CCG025758.1,CCG009458.1,CCG022496.1,CCG015062.1,CCG024000.1,CCG016965.1,CCG018164.1,CCG015333.1,CCG001301.1,CCG023199.2,CCG001431.2,CCG001341.1,CCG022398.1,CCG021521.1,CCG009562.2,CCG010139.1,CCG021940.1,CCG024639.1,CCG015846.1,CCG008833.1,CCG018168.1,CCG014509.1,CCG004783.1,CCG025691.1,CCG018042.1,CCG014463.1,CCG026788.1,CCG020543.1,CCG025549.1,CCG011015.1, |
|------------|---------------------------------|-------------------------|---------------------------|---|--------------------------------------------------------------------------------------------------------------------------------------------------------------------------------------------------------------------------------------------------------------------------------------------------------------------------------------------------------------------------------------------------------------------------------------------------------------------------------------------------------------------------------------------------------------------------------------------------------------------------------------------------------------------------------------------------------------------------------------------------------------------------------------------------------------------------------------------------------------------------------------------------------------------------------------------------------------------------------------------------------------------------------------------------------------------------------------------------------------------------------------------------------------------------------------------------------------------------------------------------------------------------------------------------------------------------------------------------------------------------------------------------------------------------------------------------------------------------------------------------|

|            |                                                  |                        |                          |   |                                                                                                                                                                                                                                                                                                                                                 |
|------------|--------------------------------------------------|------------------------|--------------------------|---|-------------------------------------------------------------------------------------------------------------------------------------------------------------------------------------------------------------------------------------------------------------------------------------------------------------------------------------------------|
| GO:0032268 | regulation of cellular protein metabolic process | 28 of 4104 in the list | 40 of 8404 in the genome | 1 | CCG013849.1,CCG003216.1,CCG028049.1,CCG017923.1,CCG016445.1,CCG013274.1,CCG015062.1,CCG024695.1,CCG005487.1,CCG005485.1,CCG012743.1,CCG004783.1,CCG009521.1,CCG003765.1,CCG009035.1,CCG004682.1,CCG001854.1,CCG006714.1,CCG005486.1,CCG026155.1,CCG020898.1,CCG023431.1,CCG013794.1,CCG016835.2,CCG011648.1,CCG026404.1,CCG018184.1,CCG021794.1 |
|------------|--------------------------------------------------|------------------------|--------------------------|---|-------------------------------------------------------------------------------------------------------------------------------------------------------------------------------------------------------------------------------------------------------------------------------------------------------------------------------------------------|

|            |                                            |                          |                            |   |                                                                                                                                                                                                                                                                                                                                                                                                                                                                                                                                                                                                                                                                                                                                                                                                                                                                                                                                                                                                                                                                                                                                                                                                                                                                                                                                                                                                                                                                                                  |
|------------|--------------------------------------------|--------------------------|----------------------------|---|--------------------------------------------------------------------------------------------------------------------------------------------------------------------------------------------------------------------------------------------------------------------------------------------------------------------------------------------------------------------------------------------------------------------------------------------------------------------------------------------------------------------------------------------------------------------------------------------------------------------------------------------------------------------------------------------------------------------------------------------------------------------------------------------------------------------------------------------------------------------------------------------------------------------------------------------------------------------------------------------------------------------------------------------------------------------------------------------------------------------------------------------------------------------------------------------------------------------------------------------------------------------------------------------------------------------------------------------------------------------------------------------------------------------------------------------------------------------------------------------------|
| GO:0044699 | single-organism process                    | 1853 of 4104 in the list | 3675 of 8404 in the genome | 1 | CCG005254.1,CCG017420.1,CCG014340.1,CCG005375.1,CCG014396.1,CCG017209.1,CCG026106.1,CCG021740.1,CCG004086.1,CCG021738.1,CCG005370.1,CCG001468.1,CCG004595.1,CCG012875.1,CCG025108.1,CCG009904.1,CCG026174.1,CCG022794.1,CCG003587.1,CCG013059.1,CCG025836.1,CCG026360.1,CCG003712.1,CCG012949.1,CCG018432.1,CCG017266.1,CCG011763.1,CCG005616.1,CCG016689.2,CCG017078.1,CCG026799.1,CCG014466.1,CCG017851.1,CCG009530.1,CCG020956.1,CCG017240.1,CCG015101.1,CCG016094.1,CCG023474.1,CCG017255.1,CCG000948.1,CCG027127.1,CCG022025.2,CCG005053.1,CCG011237.1,CCG018533.1,CCG019190.1,CCG000526.1,CCG007420.1,CCG022281.1,CCG016654.1,CCG018416.1,CCG013308.1,CCG023579.1,CCG006714.1,CCG021110.1,CCG010246.1,CCG026050.1,CCG001964.1,CCG024612.1,CCG009668.1,CCG018253.1,CCG004548.1,CCG018625.1,CCG024663.1,CCG011231.2,CCG021681.1,CCG012083.1,CCG026953.1,CCG006489.1,CCG023451.1,CCG010622.1,CCG005913.1,CCG024119.1,CCG012339.1,CCG019678.1,CCG018257.1,CCG023464.1,CCG018264.1,CCG001579.1,CCG013641.1,CCG016924.1,CCG000732.1,CCG003317.1,CCG000133.1,CCG005391.2,CCG007951.1,CCG018585.3,CCG007597.1,CCG019647.1,CCG012840.1,CCG000775.1,CCG026151.1,CCG016399.1,CCG005284.1,CCG024903.1,CCG013610.1,CCG009959.1,CCG001876.1,CCG002231.1,CCG016719.1,CCG008902.1,CCG000983.1,CCG010416.1,CCG009823.1,CCG025096.1,CCG002937.1,CCG000876.1,CCG024664.1,CCG004532.1,CCG000789.1,CCG019844.1,CCG017381.1,CCG005588.1,CCG016753.1,CCG011547.1,CCG015537.1,CCG011252.1,CCG007356.1,CCG009333.1, |
| GO:1901615 | organic hydroxy compound metabolic process | 25 of 4104 in the list   | 35 of 8404 in the genome   | 1 | CCG026536.1,CCG018054.1,CCG005286.1,CCG015949.1,CCG026331.1,CCG013318.1,CCG018055.1,CCG020559.1,CCG016653.1,CCG008317.1,CCG011327.1,CCG015587.1,CCG012875.1,CCG015680.1,CCG024095.1,CCG006358.1,CCG018029.3,CCG023757.1,CCG025827.1,CCG018923.1,CCG024433.1,CCG005177.1,CCG014174.1,CCG015679.1,                                                                                                                                                                                                                                                                                                                                                                                                                                                                                                                                                                                                                                                                                                                                                                                                                                                                                                                                                                                                                                                                                                                                                                                                 |

|            |                                   |                        |                           |   |                                                                                                                                                                                                                                                                                                                                                                                                                                                                                                                                                                                                                                                                                                                                                                                                                                                                                                                                                                                                  |
|------------|-----------------------------------|------------------------|---------------------------|---|--------------------------------------------------------------------------------------------------------------------------------------------------------------------------------------------------------------------------------------------------------------------------------------------------------------------------------------------------------------------------------------------------------------------------------------------------------------------------------------------------------------------------------------------------------------------------------------------------------------------------------------------------------------------------------------------------------------------------------------------------------------------------------------------------------------------------------------------------------------------------------------------------------------------------------------------------------------------------------------------------|
| GO:0009966 | regulation of signal transduction | 83 of 4104 in the list | 139 of 8404 in the genome | 1 | CCG016454.1,CCG021442.1,CCG025433.1,CCG021263.1,CCG012519.1,CCG026798.1,CCG026214.1,CCG023484.1,CCG009512.1,CCG022334.1,CCG009446.1,CCG024000.1,CCG016965.1,CCG027878.1,CCG015333.1,CCG010849.1,CCG003602.1,CCG004884.2,CCG002338.1,CCG002971.1,CCG019427.1,CCG018015.1,CCG001079.1,CCG010329.2,CCG021064.1,CCG021483.1,CCG028651.1,CCG012573.1,CCG011341.1,CCG019462.1,CCG008035.1,CCG011501.1,CCG004343.1,CCG019585.1,CCG012670.1,CCG012835.1,CCG013203.1,CCG018776.1,CCG022420.1,CCG018222.1,CCG009510.1,CCG010260.1,CCG010157.1,CCG002166.1,CCG002864.1,CCG011422.1,CCG006050.2,CCG022083.1,CCG000807.1,CCG024952.1,CCG004132.1,CCG010808.1,CCG009980.1,CCG017369.1,CCG025470.1,CCG008892.2,CCG004805.1,CCG022676.1,CCG024809.1,CCG009450.1,CCG009024.1,CCG022749.1,CCG018380.1,CCG002109.1,CCG021151.1,CCG017498.1,CCG025178.1,CCG005105.1,CCG001579.1,CCG022394.1,CCG016027.1,CCG017560.1,CCG006412.1,CCG000596.1,CCG019947.1,CCG025554.1,CCG013303.1,CCG007631.1,CCG025667.2,CCG016181.1, |
|------------|-----------------------------------|------------------------|---------------------------|---|--------------------------------------------------------------------------------------------------------------------------------------------------------------------------------------------------------------------------------------------------------------------------------------------------------------------------------------------------------------------------------------------------------------------------------------------------------------------------------------------------------------------------------------------------------------------------------------------------------------------------------------------------------------------------------------------------------------------------------------------------------------------------------------------------------------------------------------------------------------------------------------------------------------------------------------------------------------------------------------------------|

|            |                                  |                        |                           |   |                                                                                                                                                                                                                                                                                                                                                                                                                                                                                                                                                                                                                                                                                                                                                                                                                                                                                                                                                                                                  |
|------------|----------------------------------|------------------------|---------------------------|---|--------------------------------------------------------------------------------------------------------------------------------------------------------------------------------------------------------------------------------------------------------------------------------------------------------------------------------------------------------------------------------------------------------------------------------------------------------------------------------------------------------------------------------------------------------------------------------------------------------------------------------------------------------------------------------------------------------------------------------------------------------------------------------------------------------------------------------------------------------------------------------------------------------------------------------------------------------------------------------------------------|
| GO:0010646 | regulation of cell communication | 83 of 4104 in the list | 139 of 8404 in the genome | 1 | CCG016454.1,CCG021442.1,CCG025433.1,CCG021263.1,CCG012519.1,CCG026798.1,CCG026214.1,CCG023484.1,CCG009512.1,CCG022334.1,CCG009446.1,CCG024000.1,CCG016965.1,CCG027878.1,CCG015333.1,CCG010849.1,CCG003602.1,CCG004884.2,CCG002338.1,CCG002971.1,CCG019427.1,CCG018015.1,CCG001079.1,CCG010329.2,CCG021064.1,CCG021483.1,CCG028651.1,CCG012573.1,CCG011341.1,CCG019462.1,CCG008035.1,CCG011501.1,CCG004343.1,CCG019585.1,CCG012670.1,CCG012835.1,CCG013203.1,CCG018776.1,CCG022420.1,CCG018222.1,CCG009510.1,CCG010260.1,CCG010157.1,CCG002166.1,CCG002864.1,CCG011422.1,CCG006050.2,CCG022083.1,CCG000807.1,CCG024952.1,CCG004132.1,CCG010808.1,CCG009980.1,CCG017369.1,CCG025470.1,CCG008892.2,CCG004805.1,CCG022676.1,CCG024809.1,CCG009450.1,CCG009024.1,CCG022749.1,CCG018380.1,CCG002109.1,CCG021151.1,CCG017498.1,CCG025178.1,CCG005105.1,CCG001579.1,CCG022394.1,CCG016027.1,CCG017560.1,CCG006412.1,CCG000596.1,CCG019947.1,CCG025554.1,CCG013303.1,CCG007631.1,CCG025667.2,CCG016181.1, |
|------------|----------------------------------|------------------------|---------------------------|---|--------------------------------------------------------------------------------------------------------------------------------------------------------------------------------------------------------------------------------------------------------------------------------------------------------------------------------------------------------------------------------------------------------------------------------------------------------------------------------------------------------------------------------------------------------------------------------------------------------------------------------------------------------------------------------------------------------------------------------------------------------------------------------------------------------------------------------------------------------------------------------------------------------------------------------------------------------------------------------------------------|

|            |                                                      |                        |                           |   |                                                                                                                                                                                                                                                                                                                                                                                                                                                                                                                                                                                                                                                                                                                                                                                                                                                                                                                                                                                                  |
|------------|------------------------------------------------------|------------------------|---------------------------|---|--------------------------------------------------------------------------------------------------------------------------------------------------------------------------------------------------------------------------------------------------------------------------------------------------------------------------------------------------------------------------------------------------------------------------------------------------------------------------------------------------------------------------------------------------------------------------------------------------------------------------------------------------------------------------------------------------------------------------------------------------------------------------------------------------------------------------------------------------------------------------------------------------------------------------------------------------------------------------------------------------|
| GO:0048583 | regulation of response to stimulus                   | 83 of 4104 in the list | 139 of 8404 in the genome | 1 | CCG016454.1,CCG021442.1,CCG025433.1,CCG021263.1,CCG012519.1,CCG026798.1,CCG026214.1,CCG023484.1,CCG009512.1,CCG022334.1,CCG009446.1,CCG024000.1,CCG016965.1,CCG027878.1,CCG015333.1,CCG010849.1,CCG003602.1,CCG004884.2,CCG002338.1,CCG002971.1,CCG019427.1,CCG018015.1,CCG001079.1,CCG010329.2,CCG021064.1,CCG021483.1,CCG028651.1,CCG012573.1,CCG011341.1,CCG019462.1,CCG008035.1,CCG011501.1,CCG004343.1,CCG019585.1,CCG012670.1,CCG012835.1,CCG013203.1,CCG018776.1,CCG022420.1,CCG018222.1,CCG009510.1,CCG010260.1,CCG010157.1,CCG002166.1,CCG002864.1,CCG011422.1,CCG006050.2,CCG022083.1,CCG000807.1,CCG024952.1,CCG004132.1,CCG010808.1,CCG009980.1,CCG017369.1,CCG025470.1,CCG008892.2,CCG004805.1,CCG022676.1,CCG024809.1,CCG009450.1,CCG009024.1,CCG022749.1,CCG018380.1,CCG002109.1,CCG021151.1,CCG017498.1,CCG025178.1,CCG005105.1,CCG001579.1,CCG022394.1,CCG016027.1,CCG017560.1,CCG006412.1,CCG000596.1,CCG019947.1,CCG025554.1,CCG013303.1,CCG007631.1,CCG025667.2,CCG016181.1, |
| GO:0001510 | RNA methylation                                      | 7 of 4104 in the list  | 7 of 8404 in the genome   | 1 | CCG003755.1,CCG014335.1,CCG004234.1,CCG017176.1,CCG008401.1,CCG023156.1,CCG009425.1                                                                                                                                                                                                                                                                                                                                                                                                                                                                                                                                                                                                                                                                                                                                                                                                                                                                                                              |
| GO:0006561 | proline biosynthetic process                         | 7 of 4104 in the list  | 7 of 8404 in the genome   | 1 | CCG017111.1,CCG016220.1,CCG015921.1,CCG001423.1,CCG017894.1,CCG003871.1,CCG008860.1                                                                                                                                                                                                                                                                                                                                                                                                                                                                                                                                                                                                                                                                                                                                                                                                                                                                                                              |
| GO:0009156 | ribonucleoside monophosphate biosynthetic process    | 26 of 4104 in the list | 37 of 8404 in the genome  | 1 | CCG015410.1,CCG015746.1,CCG002038.1,CCG025107.1,CCG009142.1,CCG023640.1,CCG015747.1,CCG000148.1,CCG025348.1,CCG025989.2,CCG019619.1,CCG018659.2,CCG005924.2,CCG007533.1,CCG008422.1,CCG013610.1,CCG016614.1,CCG028305.1,CCG010112.1,CCG017330.1,CCG006791.1,CCG026865.1,CCG007724.1,CCG021934.1,                                                                                                                                                                                                                                                                                                                                                                                                                                                                                                                                                                                                                                                                                                 |
| GO:0009127 | purine nucleoside monophosphate biosynthetic process | 23 of 4104 in the list | 32 of 8404 in the genome  | 1 | CCG015410.1,CCG015746.1,CCG002038.1,CCG025107.1,CCG009142.1,CCG023640.1,CCG015747.1,CCG000148.1,CCG025348.1,CCG025989.2,CCG019619.1,CCG018659.2,CCG005924.2,CCG008422.1,CCG028305.1,CCG010112.1,CCG017330.1,CCG006791.1,CCG026865.1,CCG007724.1,CCG021934.1,CCG013643.1,CCG017295.1                                                                                                                                                                                                                                                                                                                                                                                                                                                                                                                                                                                                                                                                                                              |

|            |                                                                         |                        |                          |   |                                                                                                                                                                                                                                                                                     |
|------------|-------------------------------------------------------------------------|------------------------|--------------------------|---|-------------------------------------------------------------------------------------------------------------------------------------------------------------------------------------------------------------------------------------------------------------------------------------|
| GO:0009168 | purine ribonucleoside monophosphate biosynthetic process                | 23 of 4104 in the list | 32 of 8404 in the genome | 1 | CCG015410.1,CCG015746.1,CCG002038.1,CCG025107.1,CCG009142.1,CCG023640.1,CCG015747.1,CCG000148.1,CCG025348.1,CCG025989.2,CCG019619.1,CCG018659.2,CCG005924.2,CCG008422.1,CCG028305.1,CCG010112.1,CCG017330.1,CCG006791.1,CCG026865.1,CCG007724.1,CCG021934.1,CCG013643.1,CCG017295.1 |
| GO:0000079 | regulation of cyclin-dependent protein serine/threonine kinase activity | 15 of 4104 in the list | 19 of 8404 in the genome | 1 | CCG009521.1,CCG013849.1,CCG028049.1,CCG017923.1,CCG009035.1,CCG004682.1,CCG001854.1,CCG013274.1,CCG020898.1,CCG012743.1,CCG013794.1,CCG004783.1,CCG011648.1,CCG026404.1,CCG018184.1                                                                                                 |
| GO:0071900 | regulation of protein serine/threonine kinase activity                  | 15 of 4104 in the list | 19 of 8404 in the genome | 1 | CCG009521.1,CCG013849.1,CCG028049.1,CCG017923.1,CCG009035.1,CCG004682.1,CCG001854.1,CCG013274.1,CCG020898.1,CCG012743.1,CCG013794.1,CCG004783.1,CCG011648.1,CCG026404.1,CCG018184.1                                                                                                 |

|            |                                               |                         |                           |   |                                                                                                                                                                                                                                                                                                                                                                                                                                                                                                                                                                                                                                                                                                                                                                                                                                                                                                                                                                                                                                                                                                                                                                                                                                                                                                                                                                                                                                                                                                  |
|------------|-----------------------------------------------|-------------------------|---------------------------|---|--------------------------------------------------------------------------------------------------------------------------------------------------------------------------------------------------------------------------------------------------------------------------------------------------------------------------------------------------------------------------------------------------------------------------------------------------------------------------------------------------------------------------------------------------------------------------------------------------------------------------------------------------------------------------------------------------------------------------------------------------------------------------------------------------------------------------------------------------------------------------------------------------------------------------------------------------------------------------------------------------------------------------------------------------------------------------------------------------------------------------------------------------------------------------------------------------------------------------------------------------------------------------------------------------------------------------------------------------------------------------------------------------------------------------------------------------------------------------------------------------|
| GO:0044281 | small molecule metabolic process              | 312 of 4104 in the list | 580 of 8404 in the genome | 1 | CCG017420.1,CCG019078.1,CCG023277.1,CCG014396.1,CCG010191.3,CCG017331.1,CCG028623.1,CCG009878.1,CCG019020.1,CCG012875.1,CCG025108.1,CCG026174.1,CCG016238.1,CCG006391.1,CCG023354.1,CCG017097.1,CCG016220.1,CCG011006.1,CCG027119.1,CCG026536.1,CCG025307.1,CCG007993.1,CCG016370.1,CCG016653.1,CCG022025.2,CCG025940.1,CCG006994.1,CCG011722.1,CCG021110.1,CCG003063.1,CCG019909.1,CCG020877.1,CCG006231.1,CCG025396.1,CCG028131.1,CCG026953.1,CCG008510.1,CCG018290.1,CCG019678.1,CCG027312.1,CCG013641.1,CCG006821.1,CCG003495.1,CCG009662.1,CCG013318.1,CCG025131.2,CCG023452.1,CCG025636.2,CCG014116.1,CCG002852.1,CCG017111.1,CCG019545.1,CCG013610.1,CCG019330.1,CCG022773.2,CCG010986.1,CCG001876.1,CCG009518.1,CCG002231.1,CCG007362.1,CCG026865.1,CCG008388.1,CCG001285.1,CCG015367.1,CCG026047.1,CCG017175.1,CCG011491.1,CCG006529.1,CCG012619.1,CCG009333.1,CCG000591.1,CCG007533.1,CCG008422.1,CCG010112.1,CCG011135.1,CCG028092.1,CCG015568.1,CCG020441.1,CCG006421.1,CCG023963.3,CCG021990.1,CCG010561.1,CCG026910.1,CCG000148.1,CCG017344.1,CCG000472.1,CCG004988.1,CCG018615.3,CCG006998.1,CCG018108.1,CCG026099.1,CCG016415.1,CCG026030.1,CCG025897.1,CCG006009.1,CCG021934.1,CCG007203.1,CCG004308.1,CCG002466.1,CCG017995.1,CCG006600.1,CCG001440.1,CCG012408.1,CCG015921.1,CCG020559.1,CCG010418.1,CCG016222.1,CCG026852.1,CCG013999.1,CCG017894.1,CCG007417.1,CCG013043.1,CCG018289.1,CCG001066.1,CCG021716.1,CCG008960.1,CCG007724.1,CCG006059.1,CCG002662.1,CCG022027.1, |
| GO:0009124 | nucleoside monophosphate biosynthetic process | 27 of 4104 in the list  | 39 of 8404 in the genome  | 1 | CCG015410.1,CCG015746.1,CCG002038.1,CCG025107.1,CCG009142.1,CCG004180.1,CCG023640.1,CCG015747.1,CCG000148.1,CCG025348.1,CCG025989.2,CCG019619.1,CCG018659.2,CCG005924.2,CCG007533.1,CCG008422.1,CCG013610.1,CCG016614.1,CCG028305.1,CCG010112.1,CCG017330.1,CCG006791.1,CCG026865.1,CCG007724.1,                                                                                                                                                                                                                                                                                                                                                                                                                                                                                                                                                                                                                                                                                                                                                                                                                                                                                                                                                                                                                                                                                                                                                                                                 |



|            |                                                   |                        |                           |   |                                                                                                                                                                                                                                                                                                                                                                                                                                                                                                                                                                                                                                                                                                                                                                                                                                                                                                                                                                                                  |
|------------|---------------------------------------------------|------------------------|---------------------------|---|--------------------------------------------------------------------------------------------------------------------------------------------------------------------------------------------------------------------------------------------------------------------------------------------------------------------------------------------------------------------------------------------------------------------------------------------------------------------------------------------------------------------------------------------------------------------------------------------------------------------------------------------------------------------------------------------------------------------------------------------------------------------------------------------------------------------------------------------------------------------------------------------------------------------------------------------------------------------------------------------------|
| GO:0023051 | regulation of signaling                           | 84 of 4104 in the list | 142 of 8404 in the genome | 1 | CCG016454.1,CCG021442.1,CCG025433.1,CCG021263.1,CCG012519.1,CCG026798.1,CCG026214.1,CCG023484.1,CCG009512.1,CCG022334.1,CCG009446.1,CCG024000.1,CCG016965.1,CCG027878.1,CCG015333.1,CCG010849.1,CCG003602.1,CCG004884.2,CCG002338.1,CCG002971.1,CCG019427.1,CCG018015.1,CCG001079.1,CCG010329.2,CCG021064.1,CCG021483.1,CCG028651.1,CCG012573.1,CCG011341.1,CCG019462.1,CCG008035.1,CCG011501.1,CCG004343.1,CCG019585.1,CCG012670.1,CCG012835.1,CCG018268.1,CCG013203.1,CCG018776.1,CCG022420.1,CCG009510.1,CCG018222.1,CCG010260.1,CCG010157.1,CCG002166.1,CCG002864.1,CCG011422.1,CCG000807.1,CCG006050.2,CCG022083.1,CCG024952.1,CCG004132.1,CCG010808.1,CCG009980.1,CCG017369.1,CCG025470.1,CCG008892.2,CCG004805.1,CCG022676.1,CCG024809.1,CCG009450.1,CCG009024.1,CCG022749.1,CCG018380.1,CCG002109.1,CCG021151.1,CCG017498.1,CCG025178.1,CCG005105.1,CCG001579.1,CCG022394.1,CCG016027.1,CCG017560.1,CCG006412.1,CCG000596.1,CCG019947.1,CCG025554.1,CCG013303.1,CCG007631.1,CCG025667.2, |
| GO:0031324 | negative regulation of cellular metabolic process | 24 of 4104 in the list | 34 of 8404 in the genome  | 1 | CCG003216.1,CCG028409.1,CCG002823.1,CCG026841.1,CCG025758.1,CCG016445.1,CCG014461.1,CCG010489.1,CCG000890.1,CCG015062.1,CCG003390.1,CCG025132.1,CCG005487.1,CCG005485.1,CCG005898.1,CCG004838.1,CCG003765.1,CCG005486.1,CCG006714.1,CCG018321.1,CCG023431.1,CCG016835.2,CCG014323.1,CCG021794.1                                                                                                                                                                                                                                                                                                                                                                                                                                                                                                                                                                                                                                                                                                  |
| GO:0046034 | ATP metabolic process                             | 24 of 4104 in the list | 34 of 8404 in the genome  | 1 | CCG004308.1,CCG015410.1,CCG017693.1,CCG002038.1,CCG025107.1,CCG009142.1,CCG023640.1,CCG026314.1,CCG000148.1,CCG004309.1,CCG025348.1,CCG025989.2,CCG006486.1,CCG019619.1,CCG005924.2,CCG008422.1,CCG010112.1,CCG001066.1,CCG019866.1,CCG019678.1,CCG007724.1,CCG021934.1,CCG013643.1,CCG001285.1                                                                                                                                                                                                                                                                                                                                                                                                                                                                                                                                                                                                                                                                                                  |

|            |                                                |                        |                          |   |                                                                                                                                                                                                                                                                                                                                                                                                  |
|------------|------------------------------------------------|------------------------|--------------------------|---|--------------------------------------------------------------------------------------------------------------------------------------------------------------------------------------------------------------------------------------------------------------------------------------------------------------------------------------------------------------------------------------------------|
| GO:0007010 | cytoskeleton organization                      | 35 of 4104 in the list | 53 of 8404 in the genome | 1 | CCG015570.1,CCG018647.1,CCG002479.1,CCG026688.1,CCG015784.1,CCG026823.1,CCG023682.1,CCG019140.1,CCG019356.1,CCG027167.1,CCG019028.1,CCG000469.1,CCG005579.1,CCG019029.1,CCG014817.2,CCG003587.1,CCG021448.1,CCG027236.1,CCG024028.1,CCG011262.1,CCG009090.1,CCG009641.1,CCG003708.1,CCG016992.2,CCG014318.1,CCG000535.1,CCG022536.3,CCG021366.1,CCG027899.1,CCG002137.1,CCG019092.1,CCG010538.1, |
| GO:0009161 | ribonucleoside monophosphate metabolic process | 35 of 4104 in the list | 53 of 8404 in the genome | 1 | CCG004308.1,CCG017693.1,CCG015746.1,CCG023640.1,CCG026314.1,CCG004309.1,CCG025348.1,CCG025989.2,CCG019619.1,CCG007533.1,CCG008422.1,CCG010112.1,CCG001066.1,CCG019866.1,CCG019678.1,CCG007724.1,CCG013643.1,CCG017295.1,CCG015410.1,CCG025107.1,CCG002038.1,CCG009142.1,CCG015747.1,CCG000148.1,CCG006486.1,CCG005924.2,CCG018659.2,CCG013610.1,CCG016614.1,CCG028305.1,CCG017330.1,CCG006791.1, |

|            |                                 |                         |                           |   |                                                                                                                                                                                                                                                                                                                                                                                                                                                                                                                                                                                                                                                                                                                                                                                                                                                                                                                                                                                                                                                                                                                                                                                                                                                                                                                                                                                                                                                                                                  |
|------------|---------------------------------|-------------------------|---------------------------|---|--------------------------------------------------------------------------------------------------------------------------------------------------------------------------------------------------------------------------------------------------------------------------------------------------------------------------------------------------------------------------------------------------------------------------------------------------------------------------------------------------------------------------------------------------------------------------------------------------------------------------------------------------------------------------------------------------------------------------------------------------------------------------------------------------------------------------------------------------------------------------------------------------------------------------------------------------------------------------------------------------------------------------------------------------------------------------------------------------------------------------------------------------------------------------------------------------------------------------------------------------------------------------------------------------------------------------------------------------------------------------------------------------------------------------------------------------------------------------------------------------|
| GO:0050896 | response to stimulus            | 446 of 4104 in the list | 845 of 8404 in the genome | 1 | CCG005254.1,CCG010628.1,CCG017420.1,CCG027300.1,CCG028253.1,CCG014340.1,CCG012989.1,CCG006606.1,CCG008603.1,CCG026106.1,CCG026054.2,CCG008741.1,CCG000646.1,CCG019020.1,CCG013398.1,CCG026174.1,CCG020785.1,CCG013625.1,CCG011006.1,CCG002841.1,CCG018321.1,CCG010275.1,CCG026360.1,CCG024680.1,CCG011717.1,CCG014378.1,CCG000213.1,CCG017266.1,CCG012573.1,CCG016689.2,CCG016745.1,CCG020709.1,CCG025714.1,CCG005170.1,CCG014466.1,CCG007993.1,CCG015101.1,CCG016094.1,CCG000659.1,CCG023474.1,CCG027127.1,CCG007335.1,CCG004515.1,CCG018533.1,CCG000647.1,CCG019692.1,CCG000526.1,CCG022281.1,CCG027669.1,CCG015967.1,CCG026537.1,CCG021661.1,CCG010071.1,CCG013308.1,CCG023579.1,CCG009510.1,CCG018799.1,CCG019717.1,CCG025176.1,CCG000078.1,CCG008685.1,CCG026109.1,CCG024952.1,CCG009980.1,CCG014506.1,CCG027133.1,CCG016252.1,CCG004279.1,CCG024663.1,CCG003745.1,CCG018494.1,CCG008759.1,CCG026953.1,CCG005913.1,CCG009672.1,CCG009427.1,CCG011939.1,CCG004402.1,CCG019493.1,CCG002520.1,CCG017591.1,CCG022399.1,CCG023464.1,CCG021284.1,CCG001579.1,CCG028136.1,CCG013641.1,CCG000732.1,CCG003317.1,CCG002364.1,CCG003495.1,CCG017127.1,CCG007951.1,CCG006412.1,CCG017425.1,CCG025131.2,CCG005284.1,CCG016307.1,CCG023940.1,CCG008444.1,CCG017701.1,CCG028486.1,CCG000834.1,CCG018859.3,CCG026695.1,CCG014712.1,CCG000876.1,CCG014928.1,CCG024664.1,CCG015638.1,CCG000789.1,CCG026055.1,CCG024271.1,CCG021045.1,CCG024662.1,CCG021759.1,CCG026047.1,CCG020978.1,CCG025005.1,CCG022772.1, |
| GO:0006298 | mismatch repair                 | 9 of 4104 in the list   | 10 of 8404 in the genome  | 1 | CCG006220.1,CCG013625.1,CCG003863.1,CCG003518.3,CCG017906.1,CCG020156.1,CCG022628.1,CCG005284.1,                                                                                                                                                                                                                                                                                                                                                                                                                                                                                                                                                                                                                                                                                                                                                                                                                                                                                                                                                                                                                                                                                                                                                                                                                                                                                                                                                                                                 |
| GO:0006584 | catecholamine metabolic process | 11 of 4104 in the list  | 13 of 8404 in the genome  | 1 | CCG015680.1,CCG018029.3,CCG018054.1,CCG005286.1,CCG025827.1,CCG018923.1,CCG024433.1,CCG018055.1,CCG015679.1,CCG024665.1,CCG011327.1                                                                                                                                                                                                                                                                                                                                                                                                                                                                                                                                                                                                                                                                                                                                                                                                                                                                                                                                                                                                                                                                                                                                                                                                                                                                                                                                                              |

|            |                                                |                         |                           |   |                                                                                                                                                                                                                                                                                                                                                                                                                                                                                                                                                                                                                                                                                                                                                                                                                                                                                                                                                                                                                                                                                                                                                                                                                                                                                                                                                                                                                                                                                                  |
|------------|------------------------------------------------|-------------------------|---------------------------|---|--------------------------------------------------------------------------------------------------------------------------------------------------------------------------------------------------------------------------------------------------------------------------------------------------------------------------------------------------------------------------------------------------------------------------------------------------------------------------------------------------------------------------------------------------------------------------------------------------------------------------------------------------------------------------------------------------------------------------------------------------------------------------------------------------------------------------------------------------------------------------------------------------------------------------------------------------------------------------------------------------------------------------------------------------------------------------------------------------------------------------------------------------------------------------------------------------------------------------------------------------------------------------------------------------------------------------------------------------------------------------------------------------------------------------------------------------------------------------------------------------|
| GO:0009712 | catechol-containing compound metabolic process | 11 of 4104 in the list  | 13 of 8404 in the genome  | 1 | CCG015680.1,CCG018029.3,CCG018054.1,CCG005286.1,CCG025827.1,CCG018923.1,CCG024433.1,CCG018055.1,CCG015679.1,CCG024665.1,CCG011327.1                                                                                                                                                                                                                                                                                                                                                                                                                                                                                                                                                                                                                                                                                                                                                                                                                                                                                                                                                                                                                                                                                                                                                                                                                                                                                                                                                              |
| GO:0018958 | phenol-containing compound metabolic process   | 11 of 4104 in the list  | 13 of 8404 in the genome  | 1 | CCG015680.1,CCG018029.3,CCG018054.1,CCG005286.1,CCG025827.1,CCG018923.1,CCG024433.1,CCG018055.1,CCG015679.1,CCG024665.1,CCG011327.1                                                                                                                                                                                                                                                                                                                                                                                                                                                                                                                                                                                                                                                                                                                                                                                                                                                                                                                                                                                                                                                                                                                                                                                                                                                                                                                                                              |
| GO:0080090 | regulation of primary metabolic process        | 308 of 4104 in the list | 574 of 8404 in the genome | 1 | CCG016454.1,CCG021442.1,CCG022266.1,CCG008767.3,CCG008741.1,CCG024695.1,CCG003390.1,CCG027427.1,CCG007493.1,CCG002971.1,CCG021465.1,CCG003175.1,CCG004682.1,CCG023752.1,CCG018321.1,CCG028326.3,CCG013794.1,CCG006134.1,CCG009970.1,CCG011341.1,CCG019462.1,CCG016745.1,CCG021436.1,CCG016445.1,CCG012536.1,CCG000659.1,CCG027127.1,CCG018719.1,CCG015425.1,CCG027796.1,CCG022824.1,CCG018533.1,CCG024710.1,CCG022281.1,CCG011465.1,CCG018776.1,CCG006714.1,CCG020129.1,CCG027186.1,CCG011911.1,CCG004132.1,CCG000588.1,CCG022045.1,CCG013274.1,CCG028568.1,CCG022676.1,CCG007647.1,CCG024809.1,CCG021633.1,CCG012083.1,CCG000562.1,CCG005480.2,CCG017760.1,CCG016859.1,CCG005486.1,CCG020898.1,CCG017591.1,CCG002198.1,CCG021284.1,CCG016924.1,CCG013849.1,CCG000133.1,CCG013224.2,CCG002273.1,CCG001698.1,CCG023777.1,CCG014461.1,CCG026228.2,CCG005487.1,CCG021054.1,CCG016307.1,CCG009805.2,CCG016749.1,CCG028465.1,CCG019250.1,CCG005396.1,CCG025747.1,CCG009823.1,CCG021456.1,CCG014928.1,CCG005168.1,CCG018184.1,CCG018315.1,CCG027580.1,CCG025433.1,CCG024271.1,CCG012519.1,CCG028409.1,CCG025758.1,CCG009458.1,CCG022496.1,CCG015062.1,CCG024000.1,CCG016965.1,CCG018164.1,CCG015333.1,CCG001301.1,CCG023199.2,CCG001431.2,CCG001341.1,CCG022398.1,CCG021521.1,CCG009562.2,CCG010139.1,CCG021940.1,CCG024639.1,CCG015846.1,CCG008833.1,CCG018168.1,CCG014509.1,CCG004783.1,CCG025691.1,CCG018042.1,CCG014463.1,CCG026788.1,CCG020543.1,CCG025549.1,CCG011015.1,CCG027950.1,CCG002045.1, |

|            |                                                       |                        |                          |   |                                                                                                                                                                                                                                                                                                                                                                                                  |
|------------|-------------------------------------------------------|------------------------|--------------------------|---|--------------------------------------------------------------------------------------------------------------------------------------------------------------------------------------------------------------------------------------------------------------------------------------------------------------------------------------------------------------------------------------------------|
| GO:0009123 | nucleoside monophosphate metabolic process            | 36 of 4104 in the list | 55 of 8404 in the genome | 1 | CCG004308.1,CCG017693.1,CCG015746.1,CCG004180.1,CCG023640.1,CCG026314.1,CCG004309.1,CCG025348.1,CCG025989.2,CCG019619.1,CCG007533.1,CCG008422.1,CCG010112.1,CCG001066.1,CCG019866.1,CCG019678.1,CCG007724.1,CCG013643.1,CCG017295.1,CCG015410.1,CCG025107.1,CCG002038.1,CCG009142.1,CCG015747.1,CCG000148.1,CCG006486.1,CCG005924.2,CCG018659.2,CCG013610.1,CCG016614.1,CCG028305.1,CCG017330.1, |
| GO:0009126 | purine nucleoside monophosphate metabolic process     | 32 of 4104 in the list | 48 of 8404 in the genome | 1 | CCG004308.1,CCG015410.1,CCG017693.1,CCG015746.1,CCG002038.1,CCG025107.1,CCG009142.1,CCG023640.1,CCG015747.1,CCG026314.1,CCG000148.1,CCG004309.1,CCG025348.1,CCG025989.2,CCG006486.1,CCG019619.1,CCG018659.2,CCG005924.2,CCG008422.1,CCG028305.1,CCG010112.1,CCG017330.1,CCG001066.1,CCG006791.1,CCG026865.1,CCG019866.1,CCG019678.1,CCG007724.1,CCG021934.1,CCG013643.1,CCG001285.1,CCG017295.1  |
| GO:0009167 | purine ribonucleoside monophosphate metabolic process | 32 of 4104 in the list | 48 of 8404 in the genome | 1 | CCG004308.1,CCG015410.1,CCG017693.1,CCG015746.1,CCG002038.1,CCG025107.1,CCG009142.1,CCG023640.1,CCG015747.1,CCG026314.1,CCG000148.1,CCG004309.1,CCG025348.1,CCG025989.2,CCG006486.1,CCG019619.1,CCG018659.2,CCG005924.2,CCG008422.1,CCG028305.1,CCG010112.1,CCG017330.1,CCG001066.1,CCG006791.1,CCG026865.1,CCG019866.1,CCG019678.1,CCG007724.1,CCG021934.1,CCG013643.1,CCG001285.1,CCG017295.1  |
| GO:0043549 | regulation of kinase activity                         | 16 of 4104 in the list | 21 of 8404 in the genome | 1 | CCG013849.1,CCG028049.1,CCG017923.1,CCG013274.1,CCG012743.1,CCG004783.1,CCG009521.1,CCG009035.1,CCG004682.1,CCG001854.1,CCG020898.1,CCG013794.1,CCG011648.1,CCG018184.1,CCG026404.1,CCG021794.1                                                                                                                                                                                                  |
| GO:0045859 | regulation of protein kinase activity                 | 16 of 4104 in the list | 21 of 8404 in the genome | 1 | CCG013849.1,CCG028049.1,CCG017923.1,CCG013274.1,CCG012743.1,CCG004783.1,CCG009521.1,CCG009035.1,CCG004682.1,CCG001854.1,CCG020898.1,CCG013794.1,CCG011648.1,CCG018184.1,CCG026404.1,CCG021794.1                                                                                                                                                                                                  |

|            |                                                |                        |                          |   |                                                                                                                                                                                                                                                                                                                                                                                                             |
|------------|------------------------------------------------|------------------------|--------------------------|---|-------------------------------------------------------------------------------------------------------------------------------------------------------------------------------------------------------------------------------------------------------------------------------------------------------------------------------------------------------------------------------------------------------------|
| GO:0051338 | regulation of transferase activity             | 16 of 4104 in the list | 21 of 8404 in the genome | 1 | CCG013849.1,CCG028049.1,CCG017923.1,CCG013274.1,CCG012743.1,CCG004783.1,CCG009521.1,CCG009035.1,CCG004682.1,CCG001854.1,CCG020898.1,CCG013794.1,CCG011648.1,CCG018184.1,CCG026404.1,CCG021794.1                                                                                                                                                                                                             |
| GO:0006007 | glucose catabolic process                      | 19 of 4104 in the list | 26 of 8404 in the genome | 1 | CCG022035.1,CCG020616.1,CCG005588.1,CCG003215.3,CCG025307.1,CCG010373.1,CCG007981.1,CCG007023.1,CCG022214.1,CCG000431.1,CCG013339.1,CCG009084.2,CCG019953.1,CCG017200.1,CCG003220.2,CCG006203.1,CCG022453.1,CCG003748.1,CCG025277.1                                                                                                                                                                         |
| GO:0019320 | hexose catabolic process                       | 19 of 4104 in the list | 26 of 8404 in the genome | 1 | CCG022035.1,CCG020616.1,CCG005588.1,CCG003215.3,CCG025307.1,CCG010373.1,CCG007981.1,CCG007023.1,CCG022214.1,CCG000431.1,CCG013339.1,CCG009084.2,CCG019953.1,CCG017200.1,CCG003220.2,CCG006203.1,CCG022453.1,CCG003748.1,CCG025277.1                                                                                                                                                                         |
| GO:0044724 | single-organism carbohydrate catabolic process | 19 of 4104 in the list | 26 of 8404 in the genome | 1 | CCG022035.1,CCG020616.1,CCG005588.1,CCG003215.3,CCG025307.1,CCG010373.1,CCG007981.1,CCG007023.1,CCG022214.1,CCG000431.1,CCG013339.1,CCG009084.2,CCG019953.1,CCG017200.1,CCG003220.2,CCG006203.1,CCG022453.1,CCG003748.1,CCG025277.1                                                                                                                                                                         |
| GO:0046365 | monosaccharide catabolic process               | 19 of 4104 in the list | 26 of 8404 in the genome | 1 | CCG022035.1,CCG020616.1,CCG005588.1,CCG003215.3,CCG025307.1,CCG010373.1,CCG007981.1,CCG007023.1,CCG022214.1,CCG000431.1,CCG013339.1,CCG009084.2,CCG019953.1,CCG017200.1,CCG003220.2,CCG006203.1,CCG022453.1,CCG003748.1,CCG025277.1                                                                                                                                                                         |
| GO:1901607 | alpha-amino acid biosynthetic process          | 33 of 4104 in the list | 50 of 8404 in the genome | 1 | CCG007203.1,CCG010174.2,CCG019954.3,CCG011491.1,CCG015921.1,CCG009333.1,CCG028131.1,CCG017894.1,CCG013043.1,CCG016220.1,CCG015568.1,CCG016315.1,CCG020441.1,CCG008932.1,CCG000682.1,CCG006821.1,CCG010561.1,CCG001423.1,CCG022025.2,CCG025636.2,CCG008860.1,CCG017201.1,CCG025731.1,CCG015276.2,CCG017111.1,CCG022773.2,CCG024133.1,CCG002231.1,CCG015943.1,CCG026155.1,CCG025897.1,CCG003871.1,CCG015507.1 |

|            |                                                           |                        |                          |   |                                                                                                                                                                                                                                                                                                                                                  |
|------------|-----------------------------------------------------------|------------------------|--------------------------|---|--------------------------------------------------------------------------------------------------------------------------------------------------------------------------------------------------------------------------------------------------------------------------------------------------------------------------------------------------|
| GO:0009163 | nucleoside biosynthetic process                           | 30 of 4104 in the list | 45 of 8404 in the genome | 1 | CCG015410.1,CCG002038.1,CCG025107.1,CCG009142.1,CCG017995.1,CCG023640.1,CCG026812.1,CCG000148.1,CCG006529.1,CCG025348.1,CCG025989.2,CCG019619.1,CCG018659.2,CCG005924.2,CCG008422.1,CCG013610.1,CCG013999.1,CCG021336.1,CCG016614.1,CCG010112.1,CCG007417.1,CCG006791.1,CCG021110.1,CCG016955.1,CCG027125.1,CCG004440.1,CCG007724.1,CCG021934.1, |
| GO:0042455 | ribonucleoside biosynthetic process                       | 30 of 4104 in the list | 45 of 8404 in the genome | 1 | CCG015410.1,CCG002038.1,CCG025107.1,CCG009142.1,CCG017995.1,CCG023640.1,CCG026812.1,CCG000148.1,CCG006529.1,CCG025348.1,CCG025989.2,CCG019619.1,CCG018659.2,CCG005924.2,CCG008422.1,CCG013610.1,CCG013999.1,CCG021336.1,CCG016614.1,CCG010112.1,CCG007417.1,CCG006791.1,CCG021110.1,CCG016955.1,CCG027125.1,CCG004440.1,CCG007724.1,CCG021934.1, |
| GO:1901659 | glycosyl compound biosynthetic process                    | 30 of 4104 in the list | 45 of 8404 in the genome | 1 | CCG015410.1,CCG002038.1,CCG025107.1,CCG009142.1,CCG017995.1,CCG023640.1,CCG026812.1,CCG000148.1,CCG006529.1,CCG025348.1,CCG025989.2,CCG019619.1,CCG018659.2,CCG005924.2,CCG008422.1,CCG013610.1,CCG013999.1,CCG021336.1,CCG016614.1,CCG010112.1,CCG007417.1,CCG006791.1,CCG021110.1,CCG016955.1,CCG027125.1,CCG004440.1,CCG007724.1,CCG021934.1, |
| GO:0009890 | negative regulation of biosynthetic process               | 20 of 4104 in the list | 28 of 8404 in the genome | 1 | CCG003216.1,CCG026841.1,CCG025758.1,CCG016445.1,CCG014461.1,CCG010489.1,CCG015062.1,CCG003390.1,CCG025132.1,CCG005487.1,CCG005485.1,CCG005898.1,CCG004838.1,CCG003765.1,CCG005486.1,CCG006714.1,CCG018321.1,CCG023431.1,CCG016835.2,CCG014323.1                                                                                                  |
| GO:0010558 | negative regulation of macromolecule biosynthetic process | 20 of 4104 in the list | 28 of 8404 in the genome | 1 | CCG003216.1,CCG026841.1,CCG025758.1,CCG016445.1,CCG014461.1,CCG010489.1,CCG015062.1,CCG003390.1,CCG025132.1,CCG005487.1,CCG005485.1,CCG005898.1,CCG004838.1,CCG003765.1,CCG005486.1,CCG006714.1,CCG018321.1,CCG023431.1,CCG016835.2,CCG014323.1                                                                                                  |

|            |                                                                    |                        |                          |   |                                                                                                                                                                                                                                                 |
|------------|--------------------------------------------------------------------|------------------------|--------------------------|---|-------------------------------------------------------------------------------------------------------------------------------------------------------------------------------------------------------------------------------------------------|
| GO:0031327 | negative regulation of cellular biosynthetic process               | 20 of 4104 in the list | 28 of 8404 in the genome | 1 | CCG003216.1,CCG026841.1,CCG025758.1,CCG016445.1,CCG014461.1,CCG010489.1,CCG015062.1,CCG003390.1,CCG025132.1,CCG005487.1,CCG005485.1,CCG005898.1,CCG004838.1,CCG003765.1,CCG005486.1,CCG006714.1,CCG018321.1,CCG023431.1,CCG016835.2,CCG014323.1 |
| GO:2000113 | negative regulation of cellular macromolecule biosynthetic process | 20 of 4104 in the list | 28 of 8404 in the genome | 1 | CCG003216.1,CCG026841.1,CCG025758.1,CCG016445.1,CCG014461.1,CCG010489.1,CCG015062.1,CCG003390.1,CCG025132.1,CCG005487.1,CCG005485.1,CCG005898.1,CCG004838.1,CCG003765.1,CCG005486.1,CCG006714.1,CCG018321.1,CCG023431.1,CCG016835.2,CCG014323.1 |
| GO:0072527 | pyrimidine-containing compound metabolic process                   | 17 of 4104 in the list | 23 of 8404 in the genome | 1 | CCG004180.1,CCG017995.1,CCG017175.1,CCG006529.1,CCG016222.1,CCG023452.1,CCG005938.1,CCG014116.1,CCG025940.1,CCG013610.1,CCG018108.1,CCG025493.1,CCG016614.1,CCG007417.1,CCG021110.1,CCG010960.2,                                                |
| GO:0006275 | regulation of DNA replication                                      | 6 of 4104 in the list  | 6 of 8404 in the genome  | 1 | CCG026259.1,CCG018321.1,CCG011911.1,CCG026841.1,CCG025758.1,CCG014323.1                                                                                                                                                                         |
| GO:0006420 | arginyl-tRNA aminoacylation                                        | 6 of 4104 in the list  | 6 of 8404 in the genome  | 1 | CCG020877.1,CCG015577.3,CCG012968.1,CCG023510.1,CCG027352.3,CCG028092.1                                                                                                                                                                         |
| GO:0008643 | carbohydrate transport                                             | 6 of 4104 in the list  | 6 of 8404 in the genome  | 1 | CCG000210.1,CCG023190.1,CCG025309.1,CCG012350.1,CCG009082.1,CCG016673.1                                                                                                                                                                         |
| GO:0010389 | regulation of G2/M transition of mitotic cell cycle                | 6 of 4104 in the list  | 6 of 8404 in the genome  | 1 | CCG009521.1,CCG013849.1,CCG012743.1,CCG026404.1,CCG017923.1,CCG009035.1                                                                                                                                                                         |
| GO:0051052 | regulation of DNA metabolic process                                | 6 of 4104 in the list  | 6 of 8404 in the genome  | 1 | CCG026259.1,CCG018321.1,CCG011911.1,CCG026841.1,CCG025758.1,CCG014323.1                                                                                                                                                                         |



|            |                                           |                         |                           |   |                                                                                                                                                                                                                                                                                                                                                                                                                                                                                                                                                                                                                                                                                                                                                                                                                                                                                                                                                                                                                                                                                                                                                                                                                                                                                                                                                                                                                                                                                                  |
|------------|-------------------------------------------|-------------------------|---------------------------|---|--------------------------------------------------------------------------------------------------------------------------------------------------------------------------------------------------------------------------------------------------------------------------------------------------------------------------------------------------------------------------------------------------------------------------------------------------------------------------------------------------------------------------------------------------------------------------------------------------------------------------------------------------------------------------------------------------------------------------------------------------------------------------------------------------------------------------------------------------------------------------------------------------------------------------------------------------------------------------------------------------------------------------------------------------------------------------------------------------------------------------------------------------------------------------------------------------------------------------------------------------------------------------------------------------------------------------------------------------------------------------------------------------------------------------------------------------------------------------------------------------|
| GO:1901564 | organonitrogen compound metabolic process | 348 of 4104 in the list | 656 of 8404 in the genome | 1 | CCG017420.1,CCG019078.1,CCG023277.1,CCG014396.1,CCG010191.3,CCG018055.1,CCG006912.1,CCG017331.1,CCG009878.1,CCG005809.1,CCG019020.1,CCG012875.1,CCG024517.1,CCG025108.1,CCG016238.1,CCG004020.1,CCG016220.1,CCG011006.1,CCG007816.1,CCG026536.1,CCG020799.1,CCG025307.1,CCG016370.1,CCG006911.1,CCG022025.2,CCG005053.1,CCG025940.1,CCG023890.1,CCG006994.1,CCG019371.1,CCG011722.1,CCG021110.1,CCG003601.1,CCG010019.1,CCG003063.1,CCG016153.1,CCG020877.1,CCG006231.1,CCG021086.2,CCG025396.1,CCG028131.1,CCG026953.1,CCG008510.1,CCG024432.2,CCG014181.1,CCG019678.1,CCG013641.1,CCG006821.1,CCG003495.1,CCG025131.2,CCG023452.1,CCG025636.2,CCG014116.1,CCG002852.1,CCG017111.1,CCG019545.1,CCG013610.1,CCG019330.1,CCG022773.2,CCG003173.1,CCG010986.1,CCG001876.1,CCG018643.1,CCG025827.1,CCG009518.1,CCG002231.1,CCG028454.1,CCG020663.1,CCG011996.1,CCG008388.1,CCG001285.1,CCG022191.1,CCG015367.1,CCG017175.1,CCG007610.1,CCG011491.1,CCG002555.1,CCG009333.1,CCG006529.1,CCG017730.1,CCG007533.1,CCG008422.1,CCG007817.1,CCG010112.1,CCG011135.1,CCG028092.1,CCG015568.1,CCG020441.1,CCG006421.1,CCG023963.3,CCG010561.1,CCG026910.1,CCG020165.1,CCG023922.1,CCG007814.1,CCG000148.1,CCG017344.1,CCG000472.1,CCG006375.1,CCG018108.1,CCG017079.1,CCG026099.1,CCG023779.1,CCG016415.1,CCG026030.1,CCG003966.1,CCG025897.1,CCG021934.1,CCG010319.1,CCG007203.1,CCG004308.1,CCG027212.1,CCG017995.1,CCG015921.1,CCG010418.1,CCG016222.1,CCG022227.1,CCG023926.1,CCG017862.1,CCG026852.1, |
|------------|-------------------------------------------|-------------------------|---------------------------|---|--------------------------------------------------------------------------------------------------------------------------------------------------------------------------------------------------------------------------------------------------------------------------------------------------------------------------------------------------------------------------------------------------------------------------------------------------------------------------------------------------------------------------------------------------------------------------------------------------------------------------------------------------------------------------------------------------------------------------------------------------------------------------------------------------------------------------------------------------------------------------------------------------------------------------------------------------------------------------------------------------------------------------------------------------------------------------------------------------------------------------------------------------------------------------------------------------------------------------------------------------------------------------------------------------------------------------------------------------------------------------------------------------------------------------------------------------------------------------------------------------|

|            |                                          |                        |                           |   |                                                                                                                                                                                                                                                                                                                                                                                                                                                                                                                                                                                                                                                                                                                                                                                                                                                                                                                                                                                                                                                                                                  |
|------------|------------------------------------------|------------------------|---------------------------|---|--------------------------------------------------------------------------------------------------------------------------------------------------------------------------------------------------------------------------------------------------------------------------------------------------------------------------------------------------------------------------------------------------------------------------------------------------------------------------------------------------------------------------------------------------------------------------------------------------------------------------------------------------------------------------------------------------------------------------------------------------------------------------------------------------------------------------------------------------------------------------------------------------------------------------------------------------------------------------------------------------------------------------------------------------------------------------------------------------|
| GO:0034622 | cellular macromolecular complex assembly | 94 of 4104 in the list | 163 of 8404 in the genome | 1 | CCG006420.1,CCG013000.1,CCG003361.1,CCG019284.1,CCG008560.1,CCG010136.1,CCG021491.1,CCG010647.1,CCG003310.1,CCG005370.1,CCG009243.1,CCG013617.1,CCG000433.1,CCG026473.1,CCG012476.1,CCG002696.1,CCG014537.1,CCG010137.1,CCG006421.1,CCG023963.3,CCG005194.1,CCG009461.1,CCG024623.1,CCG025880.1,CCG014836.1,CCG010904.1,CCG024177.1,CCG004481.1,CCG012514.1,CCG027196.1,CCG014772.1,CCG002099.1,CCG026474.1,CCG016370.1,CCG010792.1,CCG025893.1,CCG009637.1,CCG007532.1,CCG010905.1,CCG007531.1,CCG018820.3,CCG026579.1,CCG010909.1,CCG010648.1,CCG017580.1,CCG013637.1,CCG009980.1,CCG010906.1,CCG015968.1,CCG018893.1,CCG010649.1,CCG010138.1,CCG025877.1,CCG010418.1,CCG008892.2,CCG015560.1,CCG027199.1,CCG009080.1,CCG027198.1,CCG025396.1,CCG008559.1,CCG018287.1,CCG027696.1,CCG010907.1,CCG008748.1,CCG012229.1,CCG010650.1,CCG000708.1,CCG025990.1,CCG024624.1,CCG009543.1,CCG009275.1,CCG004494.1,CCG002947.1,CCG015289.1,CCG010908.1,CCG005716.1,CCG007518.1,CCG027197.1,CCG022673.1,CCG005886.1,CCG026159.1,CCG027697.1,CCG020442.1,CCG010646.1,CCG017598.1,CCG002852.1,CCG010864.1, |
| GO:0009892 | negative regulation of metabolic process | 24 of 4104 in the list | 35 of 8404 in the genome  | 1 | CCG003216.1,CCG028409.1,CCG002823.1,CCG026841.1,CCG025758.1,CCG016445.1,CCG014461.1,CCG010489.1,CCG000890.1,CCG015062.1,CCG003390.1,CCG025132.1,CCG005487.1,CCG005485.1,CCG005898.1,CCG004838.1,CCG003765.1,CCG005486.1,CCG006714.1,CCG018321.1,CCG023431.1,CCG016835.2,CCG014323.1,CCG021794.1                                                                                                                                                                                                                                                                                                                                                                                                                                                                                                                                                                                                                                                                                                                                                                                                  |
| GO:0051246 | regulation of protein metabolic process  | 28 of 4104 in the list | 42 of 8404 in the genome  | 1 | CCG013849.1,CCG003216.1,CCG028049.1,CCG017923.1,CCG016445.1,CCG013274.1,CCG015062.1,CCG024695.1,CCG005487.1,CCG005485.1,CCG012743.1,CCG004783.1,CCG009521.1,CCG003765.1,CCG009035.1,CCG004682.1,CCG001854.1,CCG006714.1,CCG005486.1,CCG026155.1,CCG020898.1,CCG023431.1,CCG013794.1,CCG016835.2,CCG011648.1,CCG026404.1,CCG018184.1,CCG021794.1                                                                                                                                                                                                                                                                                                                                                                                                                                                                                                                                                                                                                                                                                                                                                  |

|            |                                          |                         |                           |   |                                                                                                                                                                                                                                                                                                                                                                                                                                                                                                                                                                                                                                                                                                                                                                                                                                                                                                                                                                                                                                                                                                                                                                                                  |
|------------|------------------------------------------|-------------------------|---------------------------|---|--------------------------------------------------------------------------------------------------------------------------------------------------------------------------------------------------------------------------------------------------------------------------------------------------------------------------------------------------------------------------------------------------------------------------------------------------------------------------------------------------------------------------------------------------------------------------------------------------------------------------------------------------------------------------------------------------------------------------------------------------------------------------------------------------------------------------------------------------------------------------------------------------------------------------------------------------------------------------------------------------------------------------------------------------------------------------------------------------------------------------------------------------------------------------------------------------|
| GO:0006119 | oxidative phosphorylation                | 10 of 4104 in the list  | 12 of 8404 in the genome  | 1 | CCG023685.1,CCG000102.1,CCG020879.1,CCG001649.1,CCG014053.1,CCG006864.1,CCG006459.1,CCG025163.3,CCG024297.1,CCG011237.1                                                                                                                                                                                                                                                                                                                                                                                                                                                                                                                                                                                                                                                                                                                                                                                                                                                                                                                                                                                                                                                                          |
| GO:0042773 | ATP synthesis coupled electron transport | 10 of 4104 in the list  | 12 of 8404 in the genome  | 1 | CCG023685.1,CCG000102.1,CCG020879.1,CCG001649.1,CCG014053.1,CCG006864.1,CCG006459.1,CCG025163.3,CCG024297.1,CCG011237.1                                                                                                                                                                                                                                                                                                                                                                                                                                                                                                                                                                                                                                                                                                                                                                                                                                                                                                                                                                                                                                                                          |
| GO:0022607 | cellular component assembly              | 101 of 4104 in the list | 177 of 8404 in the genome | 1 | CCG006420.1,CCG013000.1,CCG003361.1,CCG019284.1,CCG008560.1,CCG010136.1,CCG021491.1,CCG010647.1,CCG003310.1,CCG005370.1,CCG009243.1,CCG013617.1,CCG000433.1,CCG026473.1,CCG012476.1,CCG002696.1,CCG014537.1,CCG010137.1,CCG006421.1,CCG023963.3,CCG005194.1,CCG009461.1,CCG007395.1,CCG024623.1,CCG025880.1,CCG014836.1,CCG010904.1,CCG024177.1,CCG004481.1,CCG012514.1,CCG027196.1,CCG014772.1,CCG002099.1,CCG026474.1,CCG016370.1,CCG010792.1,CCG017033.1,CCG003485.1,CCG025893.1,CCG009637.1,CCG007532.1,CCG010905.1,CCG015583.1,CCG007531.1,CCG018820.3,CCG026579.1,CCG010909.1,CCG010648.1,CCG017580.1,CCG013637.1,CCG009980.1,CCG010906.1,CCG015968.1,CCG018893.1,CCG010649.1,CCG010138.1,CCG025877.1,CCG010418.1,CCG008892.2,CCG015560.1,CCG027199.1,CCG002366.1,CCG009080.1,CCG027198.1,CCG025396.1,CCG008559.1,CCG018287.1,CCG027696.1,CCG010907.1,CCG008748.1,CCG010650.1,CCG012229.1,CCG000708.1,CCG025990.1,CCG024624.1,CCG009543.1,CCG009275.1,CCG004494.1,CCG002947.1,CCG015289.1,CCG010908.1,CCG005716.1,CCG007518.1,CCG027197.1,CCG022673.1,CCG005886.1,CCG026159.1,CCG027697.1,CCG020442.1,CCG010646.1,CCG017598.1,CCG002852.1,CCG010864.1,CCG024787.1,CCG027695.1,CCG012584.1, |
| GO:0042221 | response to chemical                     | 26 of 4104 in the list  | 39 of 8404 in the genome  | 1 | CCG026055.1,CCG024271.1,CCG008742.1,CCG022741.1,CCG016745.1,CCG017154.1,CCG026054.2,CCG008741.1,CCG017795.1,CCG000659.1,CCG014509.1,CCG027127.1,CCG016307.1,CCG019520.1,CCG018533.1,CCG022281.1,CCG019185.1,CCG013113.1,CCG013809.1,CCG020586.1,CCG010702.1,CCG012009.1,CCG020224.1,CCG004878.1,                                                                                                                                                                                                                                                                                                                                                                                                                                                                                                                                                                                                                                                                                                                                                                                                                                                                                                 |

|            |                                          |                        |                          |   |                                                                                                                                                                                                                                                                                                                                                                                                                                                             |
|------------|------------------------------------------|------------------------|--------------------------|---|-------------------------------------------------------------------------------------------------------------------------------------------------------------------------------------------------------------------------------------------------------------------------------------------------------------------------------------------------------------------------------------------------------------------------------------------------------------|
| GO:0008652 | cellular amino acid biosynthetic process | 37 of 4104 in the list | 59 of 8404 in the genome | 1 | CCG007203.1,CCG010174.2,CCG019954.3,CCG011491.1,CCG015921.1,CCG009333.1,CCG028131.1,CCG017894.1,CCG013043.1,CCG016220.1,CCG015568.1,CCG016315.1,CCG021610.1,CCG020441.1,CCG006821.1,CCG008932.1,CCG000682.1,CCG002897.1,CCG010561.1,CCG001423.1,CCG022025.2,CCG025636.2,CCG008860.1,CCG017201.1,CCG017111.1,CCG025731.1,CCG015276.2,CCG022773.2,CCG026099.1,CCG024133.1,CCG002231.1,CCG015943.1,CCG016955.1,CCG026155.1,CCG025897.1,CCG003871.1,CCG015567.1 |
| GO:0009719 | response to endogenous stimulus          | 20 of 4104 in the list | 29 of 8404 in the genome | 1 | CCG024271.1,CCG008742.1,CCG022741.1,CCG016745.1,CCG008741.1,CCG017795.1,CCG000659.1,CCG014509.1,CCG027127.1,CCG016307.1,CCG019520.1,CCG018533.1,CCG019185.1,CCG022281.1,CCG020586.1,CCG010702.1,CCG012009.1,CCG020224.1,CCG004878.1,CCG014928.1                                                                                                                                                                                                             |
| GO:0010033 | response to organic substance            | 20 of 4104 in the list | 29 of 8404 in the genome | 1 | CCG024271.1,CCG008742.1,CCG022741.1,CCG016745.1,CCG008741.1,CCG017795.1,CCG000659.1,CCG014509.1,CCG027127.1,CCG016307.1,CCG019520.1,CCG018533.1,CCG019185.1,CCG022281.1,CCG020586.1,CCG010702.1,CCG012009.1,CCG020224.1,CCG004878.1,CCG014928.1                                                                                                                                                                                                             |
| GO:0070887 | cellular response to chemical stimulus   | 20 of 4104 in the list | 29 of 8404 in the genome | 1 | CCG024271.1,CCG008742.1,CCG022741.1,CCG016745.1,CCG008741.1,CCG017795.1,CCG000659.1,CCG014509.1,CCG027127.1,CCG016307.1,CCG019520.1,CCG018533.1,CCG019185.1,CCG022281.1,CCG020586.1,CCG010702.1,CCG012009.1,CCG020224.1,CCG004878.1,CCG014928.1                                                                                                                                                                                                             |
| GO:0071310 | cellular response to organic substance   | 20 of 4104 in the list | 29 of 8404 in the genome | 1 | CCG024271.1,CCG008742.1,CCG022741.1,CCG016745.1,CCG008741.1,CCG017795.1,CCG000659.1,CCG014509.1,CCG027127.1,CCG016307.1,CCG019520.1,CCG018533.1,CCG019185.1,CCG022281.1,CCG020586.1,CCG010702.1,CCG012009.1,CCG020224.1,CCG004878.1,CCG014928.1                                                                                                                                                                                                             |
| GO:0071495 | cellular response to endogenous stimulus | 20 of 4104 in the list | 29 of 8404 in the genome | 1 | CCG024271.1,CCG008742.1,CCG022741.1,CCG016745.1,CCG008741.1,CCG017795.1,CCG000659.1,CCG014509.1,CCG027127.1,CCG016307.1,CCG019520.1,CCG018533.1,CCG019185.1,CCG022281.1,CCG020586.1,CCG010702.1,CCG012009.1,CCG020224.1,CCG004878.1,CCG014928.1                                                                                                                                                                                                             |

|            |                                                                                      |                        |                          |   |                                                                                                                                                                                                                                                                                                                                                                                                             |
|------------|--------------------------------------------------------------------------------------|------------------------|--------------------------|---|-------------------------------------------------------------------------------------------------------------------------------------------------------------------------------------------------------------------------------------------------------------------------------------------------------------------------------------------------------------------------------------------------------------|
| GO:0000375 | RNA splicing, via transesterification reactions                                      | 11 of 4104 in the list | 14 of 8404 in the genome | 1 | CCG000393.1,CCG000183.1,CCG000754.1,CCG028285.1,CCG023686.1,CCG024810.1,CCG010792.1,CCG013802.1,CCG004927.1,CCG003938.1,CCG001898.1                                                                                                                                                                                                                                                                         |
| GO:0000377 | RNA splicing, via transesterification reactions with bulged adenosine as nucleophile | 11 of 4104 in the list | 14 of 8404 in the genome | 1 | CCG000393.1,CCG000183.1,CCG000754.1,CCG028285.1,CCG023686.1,CCG024810.1,CCG010792.1,CCG013802.1,CCG004927.1,CCG003938.1,CCG001898.1                                                                                                                                                                                                                                                                         |
| GO:0000398 | mRNA splicing, via spliceosome                                                       | 11 of 4104 in the list | 14 of 8404 in the genome | 1 | CCG000393.1,CCG000183.1,CCG000754.1,CCG028285.1,CCG023686.1,CCG024810.1,CCG010792.1,CCG013802.1,CCG004927.1,CCG003938.1,CCG001898.1                                                                                                                                                                                                                                                                         |
| GO:0006357 | regulation of transcription from RNA polymerase II promoter                          | 24 of 4104 in the list | 36 of 8404 in the genome | 1 | CCG018515.1,CCG023065.1,CCG014461.1,CCG026219.1,CCG010489.1,CCG017156.1,CCG024666.1,CCG020695.1,CCG007647.1,CCG014982.1,CCG025828.1,CCG017524.1,CCG021633.1,CCG011094.1,CCG016772.1,CCG025856.1,CCG014682.1,CCG019814.1,CCG001096.1,CCG014983.1,CCG028326.3,CCG005168.1,CCG006134.1,CCG018315.1                                                                                                             |
| GO:0031329 | regulation of cellular catabolic process                                             | 33 of 4104 in the list | 52 of 8404 in the genome | 1 | CCG016454.1,CCG021442.1,CCG022083.1,CCG025433.1,CCG022394.1,CCG016027.1,CCG011341.1,CCG019462.1,CCG012519.1,CCG004132.1,CCG003824.3,CCG017369.1,CCG024000.1,CCG025554.1,CCG016965.1,CCG022676.1,CCG013303.1,CCG027878.1,CCG024809.1,CCG009024.1,CCG007631.1,CCG023747.3,CCG015333.1,CCG002971.1,CCG016181.1,CCG013203.1,CCG018776.1,CCG002109.1,CCG021151.1,CCG015233.1,CCG010260.1,CCG002864.1,CCG005105.1 |
| GO:0016071 | mRNA metabolic process                                                               | 29 of 4104 in the list | 45 of 8404 in the genome | 1 | CCG017986.1,CCG010912.1,CCG000393.1,CCG026872.2,CCG007177.1,CCG005524.1,CCG000754.1,CCG028285.1,CCG018917.1,CCG023511.1,CCG010792.1,CCG004231.1,CCG004927.1,CCG007690.1,CCG012557.1,CCG004284.1,CCG000183.1,CCG007636.1,CCG025958.1,CCG023686.1,CCG024810.1,CCG001268.1,CCG017408.1,CCG013802.1,CCG003938.1,CCG004448.2,CCG001395.1,CCG026612.1,CCG005105.1                                                 |

|            |                                                         |                        |                           |   |                                                                                                                                                                                                                                                                                                                                                                                                                                                                                                                                                                                                                                                                                                                                                                                                 |
|------------|---------------------------------------------------------|------------------------|---------------------------|---|-------------------------------------------------------------------------------------------------------------------------------------------------------------------------------------------------------------------------------------------------------------------------------------------------------------------------------------------------------------------------------------------------------------------------------------------------------------------------------------------------------------------------------------------------------------------------------------------------------------------------------------------------------------------------------------------------------------------------------------------------------------------------------------------------|
| GO:0051056 | regulation of small GTPase mediated signal transduction | 66 of 4104 in the list | 113 of 8404 in the genome | 1 | CCG016454.1,CCG021442.1,CCG025433.1,CCG021263.1,CCG012519.1,CCG026214.1,CCG009512.1,CCG022334.1,CCG024000.1,CCG016965.1,CCG027878.1,CCG015333.1,CCG010849.1,CCG003602.1,CCG004884.2,CCG002338.1,CCG002971.1,CCG018015.1,CCG010329.2,CCG021483.1,CCG028651.1,CCG011341.1,CCG019462.1,CCG008035.1,CCG019585.1,CCG012670.1,CCG013203.1,CCG018776.1,CCG022420.1,CCG018222.1,CCG009510.1,CCG010260.1,CCG010157.1,CCG002166.1,CCG002864.1,CCG011422.1,CCG006050.2,CCG022083.1,CCG000807.1,CCG004132.1,CCG010808.1,CCG009980.1,CCG017369.1,CCG025470.1,CCG008892.2,CCG022676.1,CCG024809.1,CCG009024.1,CCG022749.1,CCG018380.1,CCG002109.1,CCG021151.1,CCG025178.1,CCG005105.1,CCG001579.1,CCG022394.1,CCG016027.1,CCG000596.1,CCG019947.1,CCG025554.1,CCG013303.1,CCG007631.1,CCG025667.2,CCG016181.1 |
| GO:1902531 | regulation of intracellular signal transduction         | 66 of 4104 in the list | 113 of 8404 in the genome | 1 | CCG016454.1,CCG021442.1,CCG025433.1,CCG021263.1,CCG012519.1,CCG026214.1,CCG009512.1,CCG022334.1,CCG024000.1,CCG016965.1,CCG027878.1,CCG015333.1,CCG010849.1,CCG003602.1,CCG004884.2,CCG002338.1,CCG002971.1,CCG018015.1,CCG010329.2,CCG021483.1,CCG028651.1,CCG011341.1,CCG019462.1,CCG008035.1,CCG019585.1,CCG012670.1,CCG013203.1,CCG018776.1,CCG022420.1,CCG018222.1,CCG009510.1,CCG010260.1,CCG010157.1,CCG002166.1,CCG002864.1,CCG011422.1,CCG006050.2,CCG022083.1,CCG000807.1,CCG004132.1,CCG010808.1,CCG009980.1,CCG017369.1,CCG025470.1,CCG008892.2,CCG022676.1,CCG024809.1,CCG009024.1,CCG022749.1,CCG018380.1,CCG002109.1,CCG021151.1,CCG025178.1,CCG005105.1,CCG001579.1,CCG022394.1,CCG016027.1,CCG000596.1,CCG019947.1,CCG025554.1,CCG013303.1,CCG007631.1,CCG025667.2,CCG016181.1 |

|            |                                                        |                        |                          |   |                                                                                                                                                                                                                                                                                                  |
|------------|--------------------------------------------------------|------------------------|--------------------------|---|--------------------------------------------------------------------------------------------------------------------------------------------------------------------------------------------------------------------------------------------------------------------------------------------------|
| GO:0042451 | purine nucleoside biosynthetic process                 | 25 of 4104 in the list | 38 of 8404 in the genome | 1 | CCG015410.1,CCG002038.1,CCG025107.1,CCG009142.1,CCG017995.1,CCG023640.1,CCG026812.1,CCG000148.1,CCG006529.1,CCG025348.1,CCG025989.2,CCG019619.1,CCG018659.2,CCG005924.2,CCG008422.1,CCG013999.1,CCG021336.1,CCG010112.1,CCG007417.1,CCG006791.1,CCG021110.1,CCG016955.1,CCG007724.1,CCG021934.1, |
| GO:0046129 | purine ribonucleoside biosynthetic process             | 25 of 4104 in the list | 38 of 8404 in the genome | 1 | CCG015410.1,CCG002038.1,CCG025107.1,CCG009142.1,CCG017995.1,CCG023640.1,CCG026812.1,CCG000148.1,CCG006529.1,CCG025348.1,CCG025989.2,CCG019619.1,CCG018659.2,CCG005924.2,CCG008422.1,CCG013999.1,CCG021336.1,CCG010112.1,CCG007417.1,CCG006791.1,CCG021110.1,CCG016955.1,CCG007724.1,CCG021934.1, |
| GO:0010605 | negative regulation of macromolecule metabolic process | 21 of 4104 in the list | 31 of 8404 in the genome | 1 | CCG003216.1,CCG026841.1,CCG025758.1,CCG016445.1,CCG014461.1,CCG010489.1,CCG015062.1,CCG003390.1,CCG025132.1,CCG005487.1,CCG005485.1,CCG005898.1,CCG004838.1,CCG003765.1,CCG005486.1,CCG006714.1,CCG018321.1,CCG023431.1,CCG016835.2,CCG014323.1,                                                 |

|            |                                                                |                         |                           |   |                                                                                                                                                                                                                                                                                                                                                                                                                                                                                                                                                                                                                                                                                                                                                                                                                                                                                                                                                                                                                                                                                                                                                                                                                                                                                                                                                                                                                                                                                                  |
|------------|----------------------------------------------------------------|-------------------------|---------------------------|---|--------------------------------------------------------------------------------------------------------------------------------------------------------------------------------------------------------------------------------------------------------------------------------------------------------------------------------------------------------------------------------------------------------------------------------------------------------------------------------------------------------------------------------------------------------------------------------------------------------------------------------------------------------------------------------------------------------------------------------------------------------------------------------------------------------------------------------------------------------------------------------------------------------------------------------------------------------------------------------------------------------------------------------------------------------------------------------------------------------------------------------------------------------------------------------------------------------------------------------------------------------------------------------------------------------------------------------------------------------------------------------------------------------------------------------------------------------------------------------------------------|
| GO:0019219 | regulation of nucleobase-containing compound metabolic process | 288 of 4104 in the list | 544 of 8404 in the genome | 1 | CCG016454.1,CCG021442.1,CCG022266.1,CCG008767.3,CCG008741.1,CCG003390.1,CCG027427.1,CCG007493.1,CCG002971.1,CCG021465.1,CCG003175.1,CCG023752.1,CCG018321.1,CCG028326.3,CCG013794.1,CCG006134.1,CCG009970.1,CCG011341.1,CCG019462.1,CCG016745.1,CCG021436.1,CCG012536.1,CCG000659.1,CCG027127.1,CCG018719.1,CCG015425.1,CCG027796.1,CCG022824.1,CCG018533.1,CCG024710.1,CCG022281.1,CCG011465.1,CCG018776.1,CCG020129.1,CCG027186.1,CCG011911.1,CCG004132.1,CCG000588.1,CCG022045.1,CCG013274.1,CCG028568.1,CCG022676.1,CCG007647.1,CCG024809.1,CCG021633.1,CCG012083.1,CCG000562.1,CCG005480.2,CCG017760.1,CCG016859.1,CCG020898.1,CCG017591.1,CCG002198.1,CCG021284.1,CCG016924.1,CCG000133.1,CCG013224.2,CCG002273.1,CCG001698.1,CCG023777.1,CCG014461.1,CCG026228.2,CCG021054.1,CCG016307.1,CCG009805.2,CCG016749.1,CCG028465.1,CCG019250.1,CCG005396.1,CCG025747.1,CCG009823.1,CCG021456.1,CCG014928.1,CCG005168.1,CCG018184.1,CCG018315.1,CCG027580.1,CCG025433.1,CCG024271.1,CCG012519.1,CCG028409.1,CCG025758.1,CCG009458.1,CCG022496.1,CCG024000.1,CCG016965.1,CCG018164.1,CCG015333.1,CCG001301.1,CCG023199.2,CCG001431.2,CCG001341.1,CCG022398.1,CCG021521.1,CCG009562.2,CCG010139.1,CCG021940.1,CCG024639.1,CCG015846.1,CCG008833.1,CCG018168.1,CCG014509.1,CCG004783.1,CCG025691.1,CCG018042.1,CCG014463.1,CCG026788.1,CCG020543.1,CCG025549.1,CCG011015.1,CCG027950.1,CCG002045.1,CCG025572.1,CCG004378.1,CCG002864.1,CCG014243.1,CCG009023.1,CCG018847.1,CCG014323.1,CCG027258.1, |
|------------|----------------------------------------------------------------|-------------------------|---------------------------|---|--------------------------------------------------------------------------------------------------------------------------------------------------------------------------------------------------------------------------------------------------------------------------------------------------------------------------------------------------------------------------------------------------------------------------------------------------------------------------------------------------------------------------------------------------------------------------------------------------------------------------------------------------------------------------------------------------------------------------------------------------------------------------------------------------------------------------------------------------------------------------------------------------------------------------------------------------------------------------------------------------------------------------------------------------------------------------------------------------------------------------------------------------------------------------------------------------------------------------------------------------------------------------------------------------------------------------------------------------------------------------------------------------------------------------------------------------------------------------------------------------|



|            |                                                   |                         |                           |   |                                                                                                                                                                                                                                                                                                                                                                                                                                                                                                                                                                                                                                                                                                                                                                                                                                                                                                                                                                                                                                                                                                                                                                                                                                                                                                                                                                                                                                                                                                  |
|------------|---------------------------------------------------|-------------------------|---------------------------|---|--------------------------------------------------------------------------------------------------------------------------------------------------------------------------------------------------------------------------------------------------------------------------------------------------------------------------------------------------------------------------------------------------------------------------------------------------------------------------------------------------------------------------------------------------------------------------------------------------------------------------------------------------------------------------------------------------------------------------------------------------------------------------------------------------------------------------------------------------------------------------------------------------------------------------------------------------------------------------------------------------------------------------------------------------------------------------------------------------------------------------------------------------------------------------------------------------------------------------------------------------------------------------------------------------------------------------------------------------------------------------------------------------------------------------------------------------------------------------------------------------|
| GO:0051171 | regulation of nitrogen compound metabolic process | 288 of 4104 in the list | 544 of 8404 in the genome | 1 | CCG016454.1,CCG021442.1,CCG022266.1,CCG008767.3,CCG008741.1,CCG003390.1,CCG027427.1,CCG007493.1,CCG002971.1,CCG021465.1,CCG003175.1,CCG023752.1,CCG018321.1,CCG028326.3,CCG013794.1,CCG006134.1,CCG009970.1,CCG011341.1,CCG019462.1,CCG016745.1,CCG021436.1,CCG012536.1,CCG000659.1,CCG027127.1,CCG018719.1,CCG015425.1,CCG027796.1,CCG022824.1,CCG018533.1,CCG024710.1,CCG022281.1,CCG011465.1,CCG018776.1,CCG020129.1,CCG027186.1,CCG011911.1,CCG004132.1,CCG000588.1,CCG022045.1,CCG013274.1,CCG028568.1,CCG022676.1,CCG007647.1,CCG024809.1,CCG021633.1,CCG012083.1,CCG000562.1,CCG005480.2,CCG017760.1,CCG016859.1,CCG020898.1,CCG017591.1,CCG002198.1,CCG021284.1,CCG016924.1,CCG000133.1,CCG013224.2,CCG002273.1,CCG001698.1,CCG023777.1,CCG014461.1,CCG026228.2,CCG021054.1,CCG016307.1,CCG009805.2,CCG016749.1,CCG028465.1,CCG019250.1,CCG005396.1,CCG025747.1,CCG009823.1,CCG021456.1,CCG014928.1,CCG005168.1,CCG018184.1,CCG018315.1,CCG027580.1,CCG025433.1,CCG024271.1,CCG012519.1,CCG028409.1,CCG025758.1,CCG009458.1,CCG022496.1,CCG024000.1,CCG016965.1,CCG018164.1,CCG015333.1,CCG001301.1,CCG023199.2,CCG001431.2,CCG001341.1,CCG022398.1,CCG021521.1,CCG009562.2,CCG010139.1,CCG021940.1,CCG024639.1,CCG015846.1,CCG008833.1,CCG018168.1,CCG014509.1,CCG004783.1,CCG025691.1,CCG018042.1,CCG014463.1,CCG026788.1,CCG020543.1,CCG025549.1,CCG011015.1,CCG027950.1,CCG002045.1,CCG025572.1,CCG004378.1,CCG002864.1,CCG014243.1,CCG009023.1,CCG018847.1,CCG014323.1,CCG027258.1, |
| GO:0006400 | tRNA modification                                 | 9 of 4104 in the list   | 11 of 8404 in the genome  | 1 | CCG016251.1,CCG027125.1,CCG004440.1,CCG005020.1,CCG004234.1,CCG010460.1,CCG022183.1,CCG023156.1,                                                                                                                                                                                                                                                                                                                                                                                                                                                                                                                                                                                                                                                                                                                                                                                                                                                                                                                                                                                                                                                                                                                                                                                                                                                                                                                                                                                                 |
| GO:0048518 | positive regulation of biological process         | 9 of 4104 in the list   | 11 of 8404 in the genome  | 1 | CCG018164.1,CCG007246.2,CCG023747.3,CCG027118.1,CCG003824.3,CCG026216.1,CCG021944.1,CCG015233.1,                                                                                                                                                                                                                                                                                                                                                                                                                                                                                                                                                                                                                                                                                                                                                                                                                                                                                                                                                                                                                                                                                                                                                                                                                                                                                                                                                                                                 |
| GO:0048522 | positive regulation of cellular process           | 9 of 4104 in the list   | 11 of 8404 in the genome  | 1 | CCG018164.1,CCG007246.2,CCG023747.3,CCG027118.1,CCG003824.3,CCG026216.1,CCG021944.1,CCG015233.1,                                                                                                                                                                                                                                                                                                                                                                                                                                                                                                                                                                                                                                                                                                                                                                                                                                                                                                                                                                                                                                                                                                                                                                                                                                                                                                                                                                                                 |

|            |                                                      |                       |                         |   |                                                             |
|------------|------------------------------------------------------|-----------------------|-------------------------|---|-------------------------------------------------------------|
| GO:0006206 | pyrimidine nucleobase metabolic process              | 5 of 4104 in the list | 5 of 8404 in the genome | 1 | CCG017175.1,CCG018108.1,CCG016614.1,CCG005938.1,CCG025940.1 |
| GO:0006207 | 'de novo' pyrimidine nucleobase biosynthetic process | 5 of 4104 in the list | 5 of 8404 in the genome | 1 | CCG017175.1,CCG018108.1,CCG016614.1,CCG005938.1,CCG025940.1 |
| GO:0006403 | RNA localization                                     | 5 of 4104 in the list | 5 of 8404 in the genome | 1 | CCG009454.1,CCG011567.1,CCG017874.1,CCG021221.1,CCG026989.1 |
| GO:0009066 | aspartate family amino acid metabolic process        | 5 of 4104 in the list | 5 of 8404 in the genome | 1 | CCG006821.1,CCG010174.2,CCG009333.1,CCG024133.1,CCG027551.3 |
| GO:0015931 | nucleobase-containing compound transport             | 5 of 4104 in the list | 5 of 8404 in the genome | 1 | CCG009454.1,CCG011567.1,CCG017874.1,CCG021221.1,CCG026989.1 |
| GO:0016073 | snRNA metabolic process                              | 5 of 4104 in the list | 5 of 8404 in the genome | 1 | CCG002792.1,CCG020286.1,CCG000540.1,CCG028653.1,CCG016652.1 |
| GO:0019856 | pyrimidine nucleobase biosynthetic process           | 5 of 4104 in the list | 5 of 8404 in the genome | 1 | CCG017175.1,CCG018108.1,CCG016614.1,CCG005938.1,CCG025940.1 |
| GO:0050657 | nucleic acid transport                               | 5 of 4104 in the list | 5 of 8404 in the genome | 1 | CCG009454.1,CCG011567.1,CCG017874.1,CCG021221.1,CCG026989.1 |
| GO:0050658 | RNA transport                                        | 5 of 4104 in the list | 5 of 8404 in the genome | 1 | CCG009454.1,CCG011567.1,CCG017874.1,CCG021221.1,CCG026989.1 |
| GO:0051028 | mRNA transport                                       | 5 of 4104 in the list | 5 of 8404 in the genome | 1 | CCG009454.1,CCG011567.1,CCG017874.1,CCG021221.1,CCG026989.1 |
| GO:0051236 | establishment of RNA localization                    | 5 of 4104 in the list | 5 of 8404 in the genome | 1 | CCG009454.1,CCG011567.1,CCG017874.1,CCG021221.1,CCG026989.1 |

|            |                               |                         |                           |   |                                                                                                                                                                                                                                                                                                                                                                                                                                                                                                                                                                                                                                                                                                                                                                                                                                                                                                                                                                                                                                                                                                                                                                                                                                                                                                                                                                                                                                                                                                  |
|------------|-------------------------------|-------------------------|---------------------------|---|--------------------------------------------------------------------------------------------------------------------------------------------------------------------------------------------------------------------------------------------------------------------------------------------------------------------------------------------------------------------------------------------------------------------------------------------------------------------------------------------------------------------------------------------------------------------------------------------------------------------------------------------------------------------------------------------------------------------------------------------------------------------------------------------------------------------------------------------------------------------------------------------------------------------------------------------------------------------------------------------------------------------------------------------------------------------------------------------------------------------------------------------------------------------------------------------------------------------------------------------------------------------------------------------------------------------------------------------------------------------------------------------------------------------------------------------------------------------------------------------------|
| GO:0051716 | cellular response to stimulus | 396 of 4104 in the list | 759 of 8404 in the genome | 1 | CCG005254.1,CCG010628.1,CCG017420.1,CCG027300.1,CCG028253.1,CCG014340.1,CCG012989.1,CCG006606.1,CCG008603.1,CCG026106.1,CCG008741.1,CCG000646.1,CCG019020.1,CCG013398.1,CCG026174.1,CCG020785.1,CCG013625.1,CCG011006.1,CCG002841.1,CCG018321.1,CCG010275.1,CCG026360.1,CCG011717.1,CCG000213.1,CCG017266.1,CCG012573.1,CCG016689.2,CCG016745.1,CCG020709.1,CCG014466.1,CCG007993.1,CCG015101.1,CCG016094.1,CCG000659.1,CCG023474.1,CCG027127.1,CCG007335.1,CCG004515.1,CCG018533.1,CCG000647.1,CCG019692.1,CCG000526.1,CCG022281.1,CCG027669.1,CCG015967.1,CCG026537.1,CCG021661.1,CCG010071.1,CCG013308.1,CCG023579.1,CCG009510.1,CCG018799.1,CCG019717.1,CCG025176.1,CCG000078.1,CCG008685.1,CCG026109.1,CCG024952.1,CCG009980.1,CCG014506.1,CCG027133.1,CCG016252.1,CCG004279.1,CCG024663.1,CCG003745.1,CCG018494.1,CCG008759.1,CCG026953.1,CCG009427.1,CCG004402.1,CCG019493.1,CCG002520.1,CCG017591.1,CCG023464.1,CCG021284.1,CCG001579.1,CCG028136.1,CCG013641.1,CCG000732.1,CCG003317.1,CCG002364.1,CCG003495.1,CCG017127.1,CCG007951.1,CCG006412.1,CCG025131.2,CCG005284.1,CCG016307.1,CCG008444.1,CCG017701.1,CCG028486.1,CCG000834.1,CCG018859.3,CCG026695.1,CCG014712.1,CCG000876.1,CCG014928.1,CCG024664.1,CCG015638.1,CCG000789.1,CCG024271.1,CCG021045.1,CCG024662.1,CCG021759.1,CCG026047.1,CCG020978.1,CCG022772.1,CCG022628.1,CCG008939.1,CCG024570.2,CCG005531.1,CCG017725.1,CCG000111.2,CCG014345.2,CCG001759.1,CCG006133.1,CCG028477.1,CCG025899.1,CCG019881.1,CCG025035.1, |
|------------|-------------------------------|-------------------------|---------------------------|---|--------------------------------------------------------------------------------------------------------------------------------------------------------------------------------------------------------------------------------------------------------------------------------------------------------------------------------------------------------------------------------------------------------------------------------------------------------------------------------------------------------------------------------------------------------------------------------------------------------------------------------------------------------------------------------------------------------------------------------------------------------------------------------------------------------------------------------------------------------------------------------------------------------------------------------------------------------------------------------------------------------------------------------------------------------------------------------------------------------------------------------------------------------------------------------------------------------------------------------------------------------------------------------------------------------------------------------------------------------------------------------------------------------------------------------------------------------------------------------------------------|

|            |                          |                        |                           |   |                                                                                                                                                                                                                                                                                                                                                                                                                                                                                                                                                                                                                                                                                                                                                                                                                                                                                                                                                                                                                                                                                                  |
|------------|--------------------------|------------------------|---------------------------|---|--------------------------------------------------------------------------------------------------------------------------------------------------------------------------------------------------------------------------------------------------------------------------------------------------------------------------------------------------------------------------------------------------------------------------------------------------------------------------------------------------------------------------------------------------------------------------------------------------------------------------------------------------------------------------------------------------------------------------------------------------------------------------------------------------------------------------------------------------------------------------------------------------------------------------------------------------------------------------------------------------------------------------------------------------------------------------------------------------|
| GO:0006461 | protein complex assembly | 91 of 4104 in the list | 161 of 8404 in the genome | 1 | CCG006420.1,CCG013000.1,CCG003361.1,CCG019284.1,CCG008560.1,CCG010136.1,CCG021491.1,CCG010647.1,CCG003310.1,CCG005370.1,CCG009243.1,CCG013617.1,CCG000433.1,CCG026473.1,CCG012476.1,CCG002696.1,CCG014537.1,CCG010137.1,CCG006421.1,CCG023963.3,CCG005194.1,CCG009461.1,CCG024623.1,CCG025880.1,CCG014836.1,CCG010904.1,CCG024177.1,CCG004481.1,CCG012514.1,CCG027196.1,CCG014772.1,CCG002099.1,CCG026474.1,CCG016370.1,CCG025893.1,CCG009637.1,CCG007532.1,CCG010905.1,CCG007531.1,CCG018820.3,CCG026579.1,CCG010909.1,CCG010648.1,CCG017580.1,CCG013637.1,CCG009980.1,CCG010906.1,CCG015968.1,CCG018893.1,CCG010649.1,CCG010138.1,CCG010418.1,CCG008892.2,CCG025877.1,CCG015560.1,CCG027199.1,CCG009080.1,CCG027198.1,CCG025396.1,CCG008559.1,CCG018287.1,CCG027696.1,CCG010907.1,CCG008748.1,CCG012229.1,CCG010650.1,CCG000708.1,CCG025990.1,CCG024624.1,CCG009543.1,CCG009275.1,CCG004494.1,CCG002947.1,CCG015289.1,CCG010908.1,CCG005716.1,CCG027197.1,CCG022673.1,CCG005886.1,CCG026159.1,CCG027697.1,CCG020442.1,CCG010646.1,CCG017598.1,CCG002852.1,CCG010864.1,CCG024787.1,CCG027695.1, |
|------------|--------------------------|------------------------|---------------------------|---|--------------------------------------------------------------------------------------------------------------------------------------------------------------------------------------------------------------------------------------------------------------------------------------------------------------------------------------------------------------------------------------------------------------------------------------------------------------------------------------------------------------------------------------------------------------------------------------------------------------------------------------------------------------------------------------------------------------------------------------------------------------------------------------------------------------------------------------------------------------------------------------------------------------------------------------------------------------------------------------------------------------------------------------------------------------------------------------------------|

|            |                                                     |                        |                           |   |                                                                                                                                                                                                                                                                                                                                                                                                                                                                                                                                                                                                                                                                                                                                                                                                                                                                                                                                                                                                                                                                                                  |
|------------|-----------------------------------------------------|------------------------|---------------------------|---|--------------------------------------------------------------------------------------------------------------------------------------------------------------------------------------------------------------------------------------------------------------------------------------------------------------------------------------------------------------------------------------------------------------------------------------------------------------------------------------------------------------------------------------------------------------------------------------------------------------------------------------------------------------------------------------------------------------------------------------------------------------------------------------------------------------------------------------------------------------------------------------------------------------------------------------------------------------------------------------------------------------------------------------------------------------------------------------------------|
| GO:0070271 | protein complex biogenesis                          | 91 of 4104 in the list | 161 of 8404 in the genome | 1 | CCG006420.1,CCG013000.1,CCG003361.1,CCG019284.1,CCG008560.1,CCG010136.1,CCG021491.1,CCG010647.1,CCG003310.1,CCG005370.1,CCG009243.1,CCG013617.1,CCG000433.1,CCG026473.1,CCG012476.1,CCG002696.1,CCG014537.1,CCG010137.1,CCG006421.1,CCG023963.3,CCG005194.1,CCG009461.1,CCG024623.1,CCG025880.1,CCG014836.1,CCG010904.1,CCG024177.1,CCG004481.1,CCG012514.1,CCG027196.1,CCG014772.1,CCG002099.1,CCG026474.1,CCG016370.1,CCG025893.1,CCG009637.1,CCG007532.1,CCG010905.1,CCG007531.1,CCG018820.3,CCG026579.1,CCG010909.1,CCG010648.1,CCG017580.1,CCG013637.1,CCG009980.1,CCG010906.1,CCG015968.1,CCG018893.1,CCG010649.1,CCG010138.1,CCG010418.1,CCG008892.2,CCG025877.1,CCG015560.1,CCG027199.1,CCG009080.1,CCG027198.1,CCG025396.1,CCG008559.1,CCG018287.1,CCG027696.1,CCG010907.1,CCG008748.1,CCG012229.1,CCG010650.1,CCG000708.1,CCG025990.1,CCG024624.1,CCG009543.1,CCG009275.1,CCG004494.1,CCG002947.1,CCG015289.1,CCG010908.1,CCG005716.1,CCG027197.1,CCG022673.1,CCG005886.1,CCG026159.1,CCG027697.1,CCG020442.1,CCG010646.1,CCG017598.1,CCG002852.1,CCG010864.1,CCG024787.1,CCG027695.1, |
| GO:0044282 | small molecule catabolic process                    | 22 of 4104 in the list | 33 of 8404 in the genome  | 1 | CCG007203.1,CCG019243.1,CCG010111.1,CCG025521.1,CCG020154.1,CCG000591.1,CCG025108.1,CCG011789.1,CCG006358.1,CCG001082.1,CCG011721.1,CCG006391.1,CCG002231.1,CCG008510.1,CCG005177.1,CCG011722.1,CCG019834.1,CCG018851.1,CCG003063.1,CCG006059.1,                                                                                                                                                                                                                                                                                                                                                                                                                                                                                                                                                                                                                                                                                                                                                                                                                                                 |
| GO:0000096 | sulfur amino acid metabolic process                 | 7 of 4104 in the list  | 8 of 8404 in the genome   | 1 | CCG006994.1,CCG025465.1,CCG018907.1,CCG015568.1,CCG027551.3,CCG015567.1,CCG025636.2                                                                                                                                                                                                                                                                                                                                                                                                                                                                                                                                                                                                                                                                                                                                                                                                                                                                                                                                                                                                              |
| GO:0006302 | double-strand break repair                          | 7 of 4104 in the list  | 8 of 8404 in the genome   | 1 | CCG017444.1,CCG005594.1,CCG005481.1,CCG018472.1,CCG009962.1,CCG004233.1,CCG023155.1                                                                                                                                                                                                                                                                                                                                                                                                                                                                                                                                                                                                                                                                                                                                                                                                                                                                                                                                                                                                              |
| GO:0072528 | pyrimidine-containing compound biosynthetic process | 15 of 4104 in the list | 21 of 8404 in the genome  | 1 | CCG025493.1,CCG018108.1,CCG013610.1,CCG016614.1,CCG004180.1,CCG017995.1,CCG007417.1,CCG021110.1,CCG017175.1,CCG006529.1,CCG023452.1,CCG005938.1,CCG014116.1,CCG010319.1,CCG025940.1                                                                                                                                                                                                                                                                                                                                                                                                                                                                                                                                                                                                                                                                                                                                                                                                                                                                                                              |

|            |                                                        |                         |                           |   |                                                                                                                                                                                                                                                                                                                                                                                                                                                                                                                                                                                                                                                                                                                                                                                                                                                                                                                                                                                                                                                                                                                                                                                                                                                                                                                                                                                                                                                                                                  |
|------------|--------------------------------------------------------|-------------------------|---------------------------|---|--------------------------------------------------------------------------------------------------------------------------------------------------------------------------------------------------------------------------------------------------------------------------------------------------------------------------------------------------------------------------------------------------------------------------------------------------------------------------------------------------------------------------------------------------------------------------------------------------------------------------------------------------------------------------------------------------------------------------------------------------------------------------------------------------------------------------------------------------------------------------------------------------------------------------------------------------------------------------------------------------------------------------------------------------------------------------------------------------------------------------------------------------------------------------------------------------------------------------------------------------------------------------------------------------------------------------------------------------------------------------------------------------------------------------------------------------------------------------------------------------|
| GO:0055086 | nucleobase-containing small molecule metabolic process | 149 of 4104 in the list | 273 of 8404 in the genome | 1 | CCG006420.1,CCG017420.1,CCG002549.1,CCG013000.1,CCG017331.1,CCG013766.1,CCG025989.2,CCG024327.1,CCG015386.1,CCG019020.1,CCG025493.1,CCG026174.1,CCG000016.1,CCG002925.1,CCG023005.1,CCG024375.1,CCG003748.1,CCG009607.1,CCG011006.1,CCG027119.1,CCG025307.1,CCG007993.1,CCG016370.1,CCG006311.1,CCG002917.1,CCG006486.1,CCG025940.1,CCG010944.1,CCG021110.1,CCG010960.2,CCG015746.1,CCG023640.1,CCG025348.1,CCG004191.1,CCG019619.1,CCG004869.1,CCG009080.1,CCG025396.1,CCG028131.1,CCG026953.1,CCG006924.1,CCG021220.1,CCG009165.1,CCG019678.1,CCG003677.1,CCG010460.1,CCG013641.1,CCG015410.1,CCG015289.1,CCG009142.1,CCG003495.1,CCG021411.1,CCG026898.1,CCG001859.1,CCG025131.2,CCG023452.1,CCG014116.1,CCG002852.1,CCG013610.1,CCG010986.1,CCG009518.1,CCG006791.1,CCG007362.1,CCG021152.1,CCG026865.1,CCG023526.2,CCG001285.1,CCG017693.1,CCG007060.1,CCG026047.1,CCG017175.1,CCG006529.1,CCG004309.1,CCG007533.1,CCG008422.1,CCG009243.1,CCG010112.1,CCG007827.1,CCG023963.3,CCG006421.1,CCG013643.1,CCG014434.1,CCG021990.1,CCG002038.1,CCG025027.1,CCG019103.1,CCG000148.1,CCG019629.2,CCG013365.1,CCG005147.1,CCG004988.1,CCG005924.2,CCG006998.1,CCG018108.1,CCG020909.1,CCG004257.1,CCG007532.1,CCG017330.1,CCG007531.1,CCG018447.1,CCG016966.1,CCG016415.1,CCG018820.3,CCG025179.1,CCG000217.1,CCG021934.1,CCG006777.1,CCG014379.1,CCG004308.1,CCG025973.1,CCG004180.1,CCG017995.1,CCG013637.1,CCG026314.1,CCG001440.1,CCG010418.1,CCG016222.1,CCG026852.1,CCG005938.1,CCG009801.1, |
|------------|--------------------------------------------------------|-------------------------|---------------------------|---|--------------------------------------------------------------------------------------------------------------------------------------------------------------------------------------------------------------------------------------------------------------------------------------------------------------------------------------------------------------------------------------------------------------------------------------------------------------------------------------------------------------------------------------------------------------------------------------------------------------------------------------------------------------------------------------------------------------------------------------------------------------------------------------------------------------------------------------------------------------------------------------------------------------------------------------------------------------------------------------------------------------------------------------------------------------------------------------------------------------------------------------------------------------------------------------------------------------------------------------------------------------------------------------------------------------------------------------------------------------------------------------------------------------------------------------------------------------------------------------------------|

|            |                                 |                        |                           |   |                                                                                                                                                                                                                                                                                                                                                                                                                                                                                                                                                                                                                                                                                                                                                                                                                                                                                                                                                                                                                                                                                                  |
|------------|---------------------------------|------------------------|---------------------------|---|--------------------------------------------------------------------------------------------------------------------------------------------------------------------------------------------------------------------------------------------------------------------------------------------------------------------------------------------------------------------------------------------------------------------------------------------------------------------------------------------------------------------------------------------------------------------------------------------------------------------------------------------------------------------------------------------------------------------------------------------------------------------------------------------------------------------------------------------------------------------------------------------------------------------------------------------------------------------------------------------------------------------------------------------------------------------------------------------------|
| GO:0065003 | macromolecular complex assembly | 94 of 4104 in the list | 167 of 8404 in the genome | 1 | CCG006420.1,CCG013000.1,CCG003361.1,CCG019284.1,CCG008560.1,CCG010136.1,CCG021491.1,CCG010647.1,CCG003310.1,CCG005370.1,CCG009243.1,CCG013617.1,CCG000433.1,CCG026473.1,CCG012476.1,CCG002696.1,CCG014537.1,CCG010137.1,CCG006421.1,CCG023963.3,CCG005194.1,CCG009461.1,CCG024623.1,CCG025880.1,CCG014836.1,CCG010904.1,CCG024177.1,CCG004481.1,CCG012514.1,CCG027196.1,CCG014772.1,CCG002099.1,CCG026474.1,CCG016370.1,CCG010792.1,CCG025893.1,CCG009637.1,CCG007532.1,CCG010905.1,CCG007531.1,CCG018820.3,CCG026579.1,CCG010909.1,CCG010648.1,CCG017580.1,CCG013637.1,CCG009980.1,CCG010906.1,CCG015968.1,CCG018893.1,CCG010649.1,CCG010138.1,CCG025877.1,CCG010418.1,CCG008892.2,CCG015560.1,CCG027199.1,CCG009080.1,CCG027198.1,CCG025396.1,CCG008559.1,CCG018287.1,CCG027696.1,CCG010907.1,CCG008748.1,CCG012229.1,CCG010650.1,CCG000708.1,CCG025990.1,CCG024624.1,CCG009543.1,CCG009275.1,CCG004494.1,CCG002947.1,CCG015289.1,CCG010908.1,CCG005716.1,CCG007518.1,CCG027197.1,CCG022673.1,CCG005886.1,CCG026159.1,CCG027697.1,CCG020442.1,CCG010646.1,CCG017598.1,CCG002852.1,CCG010864.1, |
|------------|---------------------------------|------------------------|---------------------------|---|--------------------------------------------------------------------------------------------------------------------------------------------------------------------------------------------------------------------------------------------------------------------------------------------------------------------------------------------------------------------------------------------------------------------------------------------------------------------------------------------------------------------------------------------------------------------------------------------------------------------------------------------------------------------------------------------------------------------------------------------------------------------------------------------------------------------------------------------------------------------------------------------------------------------------------------------------------------------------------------------------------------------------------------------------------------------------------------------------|

|            |                                               |                         |                           |   |                                                                                                                                                                                                                                                                                                                                                                                                                                                                                                                                                                                                                                                                                                                                                                                                                                                                                                                                                                                                                                                                                                                                                                                                                                                                                                                                                                                                                                                                                                  |
|------------|-----------------------------------------------|-------------------------|---------------------------|---|--------------------------------------------------------------------------------------------------------------------------------------------------------------------------------------------------------------------------------------------------------------------------------------------------------------------------------------------------------------------------------------------------------------------------------------------------------------------------------------------------------------------------------------------------------------------------------------------------------------------------------------------------------------------------------------------------------------------------------------------------------------------------------------------------------------------------------------------------------------------------------------------------------------------------------------------------------------------------------------------------------------------------------------------------------------------------------------------------------------------------------------------------------------------------------------------------------------------------------------------------------------------------------------------------------------------------------------------------------------------------------------------------------------------------------------------------------------------------------------------------|
| GO:0060255 | regulation of macromolecule metabolic process | 277 of 4104 in the list | 524 of 8404 in the genome | 1 | CCG022266.1,CCG008767.3,CCG008741.1,CCG024695.1,CCG003390.1,CCG027427.1,CCG007493.1,CCG021465.1,CCG003175.1,CCG004682.1,CCG023752.1,CCG018321.1,CCG028326.3,CCG013794.1,CCG006134.1,CCG009970.1,CCG016745.1,CCG021436.1,CCG016445.1,CCG012536.1,CCG000659.1,CCG027127.1,CCG018719.1,CCG015425.1,CCG027796.1,CCG022824.1,CCG018533.1,CCG024710.1,CCG022281.1,CCG011465.1,CCG006714.1,CCG020129.1,CCG027186.1,CCG011911.1,CCG000588.1,CCG022045.1,CCG013274.1,CCG028568.1,CCG007647.1,CCG021633.1,CCG012083.1,CCG000562.1,CCG005480.2,CCG017760.1,CCG005486.1,CCG016859.1,CCG020898.1,CCG017591.1,CCG002198.1,CCG021284.1,CCG016924.1,CCG013849.1,CCG000133.1,CCG013224.2,CCG002273.1,CCG001698.1,CCG023777.1,CCG014461.1,CCG026228.2,CCG005487.1,CCG021054.1,CCG016307.1,CCG009805.2,CCG016749.1,CCG028465.1,CCG019250.1,CCG005396.1,CCG025747.1,CCG009823.1,CCG021456.1,CCG014928.1,CCG005168.1,CCG018184.1,CCG018315.1,CCG027580.1,CCG024271.1,CCG025758.1,CCG009458.1,CCG022496.1,CCG015062.1,CCG018164.1,CCG001301.1,CCG023199.2,CCG001431.2,CCG001341.1,CCG022398.1,CCG021521.1,CCG009562.2,CCG010139.1,CCG021940.1,CCG024639.1,CCG015846.1,CCG008833.1,CCG018168.1,CCG014509.1,CCG004783.1,CCG025691.1,CCG018042.1,CCG014463.1,CCG026788.1,CCG020543.1,CCG025549.1,CCG011015.1,CCG027950.1,CCG002045.1,CCG025572.1,CCG004378.1,CCG014243.1,CCG009023.1,CCG018847.1,CCG014323.1,CCG027258.1,CCG008371.1,CCG022947.1,CCG008742.1,CCG011228.1,CCG004762.2,CCG028421.1,CCG003427.1,CCG026259.1, |
|------------|-----------------------------------------------|-------------------------|---------------------------|---|--------------------------------------------------------------------------------------------------------------------------------------------------------------------------------------------------------------------------------------------------------------------------------------------------------------------------------------------------------------------------------------------------------------------------------------------------------------------------------------------------------------------------------------------------------------------------------------------------------------------------------------------------------------------------------------------------------------------------------------------------------------------------------------------------------------------------------------------------------------------------------------------------------------------------------------------------------------------------------------------------------------------------------------------------------------------------------------------------------------------------------------------------------------------------------------------------------------------------------------------------------------------------------------------------------------------------------------------------------------------------------------------------------------------------------------------------------------------------------------------------|



|            |                                  |                        |                           |   |                                                                                                                                                                                                                                                                                                                                                                                                                                                                                                                                                                                                                                                                                                                                                                                                                                                                                                 |
|------------|----------------------------------|------------------------|---------------------------|---|-------------------------------------------------------------------------------------------------------------------------------------------------------------------------------------------------------------------------------------------------------------------------------------------------------------------------------------------------------------------------------------------------------------------------------------------------------------------------------------------------------------------------------------------------------------------------------------------------------------------------------------------------------------------------------------------------------------------------------------------------------------------------------------------------------------------------------------------------------------------------------------------------|
| GO:0051336 | regulation of hydrolase activity | 32 of 4104 in the list | 51 of 8404 in the genome  | 1 | CCG016454.1,CCG021442.1,CCG022083.1,CCG025433.1,CCG022394.1,CCG016027.1,CCG011341.1,CCG019462.1,CCG012519.1,CCG004132.1,CCG017369.1,CCG017560.1,CCG024000.1,CCG025554.1,CCG016965.1,CCG022676.1,CCG013303.1,CCG027878.1,CCG024809.1,CCG009450.1,CCG009024.1,CCG007631.1,CCG015333.1,CCG002971.1,CCG016181.1,CCG013203.1,CCG018776.1,CCG002109.1,CCG021151.1,CCG010260.1,CCG002864.1,CCG005105.1                                                                                                                                                                                                                                                                                                                                                                                                                                                                                                 |
| GO:0071103 | DNA conformation change          | 76 of 4104 in the list | 133 of 8404 in the genome | 1 | CCG016201.1,CCG003361.1,CCG019284.1,CCG008560.1,CCG010136.1,CCG021491.1,CCG010647.1,CCG003310.1,CCG022918.1,CCG013617.1,CCG000433.1,CCG026473.1,CCG012476.1,CCG014537.1,CCG010137.1,CCG005194.1,CCG009461.1,CCG024623.1,CCG025880.1,CCG014836.1,CCG010904.1,CCG024177.1,CCG004481.1,CCG012514.1,CCG027196.1,CCG014772.1,CCG026474.1,CCG027183.2,CCG000166.1,CCG025893.1,CCG009637.1,CCG010905.1,CCG026579.1,CCG010909.1,CCG010648.1,CCG011615.1,CCG017580.1,CCG009980.1,CCG010906.1,CCG015968.1,CCG018893.1,CCG010138.1,CCG010649.1,CCG008892.2,CCG025877.1,CCG015560.1,CCG027199.1,CCG027198.1,CCG003438.1,CCG018287.1,CCG008559.1,CCG027696.1,CCG010907.1,CCG012229.1,CCG010650.1,CCG000708.1,CCG025990.1,CCG024624.1,CCG009275.1,CCG004494.1,CCG002947.1,CCG010908.1,CCG005716.1,CCG027197.1,CCG022673.1,CCG026159.1,CCG027697.1,CCG020442.1,CCG010646.1,CCG017598.1,CCG024787.1,CCG027695.1 |

|            |                                               |                        |                           |   |                                                                                                                                                                                                                                                                                                                                                                                                                                                                                                                                                                                                                                                                                                                                                                                                                                                                                                  |
|------------|-----------------------------------------------|------------------------|---------------------------|---|--------------------------------------------------------------------------------------------------------------------------------------------------------------------------------------------------------------------------------------------------------------------------------------------------------------------------------------------------------------------------------------------------------------------------------------------------------------------------------------------------------------------------------------------------------------------------------------------------------------------------------------------------------------------------------------------------------------------------------------------------------------------------------------------------------------------------------------------------------------------------------------------------|
| GO:1901137 | carbohydrate derivative biosynthetic process  | 76 of 4104 in the list | 133 of 8404 in the genome | 1 | CCG017381.1,CCG018536.1,CCG023617.1,CCG000663.1,CCG006529.1,CCG007766.1,CCG001602.1,CCG025989.2,CCG004806.1,CCG008422.1,CCG024517.1,CCG007330.1,CCG010112.1,CCG004091.1,CCG011531.1,CCG009494.1,CCG025472.1,CCG013643.1,CCG018432.1,CCG022209.1,CCG002038.1,CCG009434.1,CCG014839.1,CCG014579.1,CCG000148.1,CCG013365.1,CCG025889.1,CCG005924.2,CCG024760.1,CCG028332.1,CCG017330.1,CCG019210.1,CCG021110.1,CCG024612.1,CCG021934.1,CCG010700.1,CCG017559.1,CCG017995.1,CCG004180.1,CCG023640.1,CCG013131.1,CCG026370.1,CCG012268.1,CCG025348.1,CCG009928.1,CCG016003.1,CCG019619.1,CCG013999.1,CCG021336.1,CCG007417.1,CCG004440.1,CCG022072.1,CCG007724.1,CCG021610.1,CCG003247.1,CCG010460.1,CCG015410.1,CCG017241.1,CCG025107.1,CCG009142.1,CCG027131.1,CCG026898.1,CCG026812.1,CCG017197.1,CCG013985.1,CCG000552.1,CCG018659.2,CCG014116.1,CCG013610.1,CCG016614.1,CCG028305.1,CCG006221.1, |
| GO:0035023 | regulation of Rho protein signal transduction | 23 of 4104 in the list | 35 of 8404 in the genome  | 1 | CCG006050.2,CCG026214.1,CCG009980.1,CCG010808.1,CCG009512.1,CCG008035.1,CCG022334.1,CCG008892.2,CCG000596.1,CCG019585.1,CCG012670.1,CCG010849.1,CCG025667.2,CCG003602.1,CCG004884.2,CCG009510.1,CCG018380.1,CCG018015.1,CCG010329.2,CCG021294.1,CCG021483.1,CCG011422.1,CCG001579.1                                                                                                                                                                                                                                                                                                                                                                                                                                                                                                                                                                                                              |
| GO:0006140 | regulation of nucleotide metabolic process    | 33 of 4104 in the list | 53 of 8404 in the genome  | 1 | CCG016454.1,CCG021442.1,CCG022083.1,CCG025433.1,CCG022394.1,CCG016027.1,CCG011341.1,CCG019462.1,CCG012519.1,CCG004132.1,CCG028409.1,CCG017369.1,CCG002823.1,CCG000890.1,CCG024000.1,CCG025554.1,CCG016965.1,CCG022676.1,CCG013303.1,CCG027878.1,CCG024809.1,CCG009024.1,CCG007631.1,CCG015333.1,CCG002971.1,CCG016181.1,CCG013203.1,CCG018776.1,CCG002109.1,CCG021151.1,CCG010260.1,CCG002864.1,                                                                                                                                                                                                                                                                                                                                                                                                                                                                                                 |

|            |                                               |                        |                          |   |                                                                                                                                                                                                                                                                                                                                                                                                                                                                                                                                                                                                 |
|------------|-----------------------------------------------|------------------------|--------------------------|---|-------------------------------------------------------------------------------------------------------------------------------------------------------------------------------------------------------------------------------------------------------------------------------------------------------------------------------------------------------------------------------------------------------------------------------------------------------------------------------------------------------------------------------------------------------------------------------------------------|
| GO:0006397 | mRNA processing                               | 24 of 4104 in the list | 37 of 8404 in the genome | 1 | CCG017986.1,CCG010912.1,CCG000393.1,CCG026872.2,CCG007177.1,CCG000754.1,CCG028285.1,CCG023511.1,CCG010792.1,CCG004231.1,CCG004927.1,CCG012557.1,CCG004284.1,CCG007636.1,CCG000183.1,CCG025958.1,CCG023686.1,CCG024810.1,CCG001268.1,CCG017408.1,CCG013802.1,CCG003938.1,CCG001395.1,CCG001898.1                                                                                                                                                                                                                                                                                                 |
| GO:0009064 | glutamine family amino acid metabolic process | 16 of 4104 in the list | 23 of 8404 in the genome | 1 | CCG007203.1,CCG015921.1,CCG001423.1,CCG021923.1,CCG000472.1,CCG023501.1,CCG008860.1,CCG025731.1,CCG017111.1,CCG022773.2,CCG017894.1,CCG002231.1,CCG016220.1,CCG026030.1,CCG025897.1,CCG003871.1                                                                                                                                                                                                                                                                                                                                                                                                 |
| GO:1902589 | single-organism organelle organization        | 48 of 4104 in the list | 81 of 8404 in the genome | 1 | CCG015570.1,CCG018832.1,CCG018647.1,CCG026688.1,CCG006211.1,CCG015784.1,CCG020863.1,CCG026823.1,CCG023682.1,CCG026620.1,CCG019140.1,CCG019356.1,CCG020949.1,CCG027167.1,CCG019028.1,CCG000469.1,CCG012083.1,CCG018326.1,CCG005579.1,CCG001369.2,CCG019029.1,CCG014817.2,CCG003587.1,CCG021448.1,CCG025991.2,CCG020315.1,CCG013028.1,CCG019797.1,CCG027236.1,CCG024028.1,CCG011262.1,CCG009090.1,CCG009641.1,CCG006686.1,CCG016992.2,CCG014318.1,CCG000535.1,CCG022536.3,CCG015398.1,CCG018249.1,CCG021366.1,CCG002137.1,CCG019092.1,CCG024421.3,CCG019528.1,CCG008824.1,CCG019178.1,CCG018646.1 |

|            |                                                                         |                        |                           |   |                                                                                                                                                                                                                                                                                                                                                                                                                                                                                                                                                                                                                                                                                                                                                                                                                                                                                                                                                                                                  |
|------------|-------------------------------------------------------------------------|------------------------|---------------------------|---|--------------------------------------------------------------------------------------------------------------------------------------------------------------------------------------------------------------------------------------------------------------------------------------------------------------------------------------------------------------------------------------------------------------------------------------------------------------------------------------------------------------------------------------------------------------------------------------------------------------------------------------------------------------------------------------------------------------------------------------------------------------------------------------------------------------------------------------------------------------------------------------------------------------------------------------------------------------------------------------------------|
| GO:0009141 | nucleoside triphosphate metabolic process                               | 84 of 4104 in the list | 149 of 8404 in the genome | 1 | CCG006420.1,CCG017420.1,CCG002549.1,CCG017693.1,CCG007060.1,CCG013000.1,CCG004309.1,CCG006529.1,CCG025989.2,CCG024327.1,CCG015386.1,CCG019020.1,CCG009243.1,CCG008422.1,CCG010112.1,CCG009607.1,CCG011006.1,CCG007827.1,CCG014434.1,CCG013643.1,CCG006421.1,CCG023963.3,CCG002038.1,CCG025027.1,CCG016370.1,CCG000148.1,CCG019103.1,CCG019629.2,CCG002917.1,CCG006486.1,CCG005924.2,CCG020909.1,CCG007532.1,CCG007531.1,CCG018447.1,CCG016966.1,CCG018820.3,CCG021110.1,CCG010960.2,CCG025179.1,CCG021934.1,CCG006777.1,CCG004308.1,CCG025973.1,CCG017995.1,CCG013637.1,CCG023640.1,CCG026314.1,CCG010418.1,CCG025348.1,CCG016222.1,CCG009080.1,CCG004869.1,CCG019619.1,CCG025396.1,CCG026953.1,CCG006924.1,CCG007417.1,CCG021220.1,CCG001066.1,CCG019866.1,CCG019678.1,CCG008748.1,CCG007724.1,CCG013641.1,CCG015410.1,CCG016027.1,CCG015289.1,CCG025107.1,CCG003495.1,CCG021411.1,CCG009142.1,CCG001859.1,CCG026336.1,CCG005886.1,CCG025131.2,CCG016542.1,CCG026154.1,CCG015654.1,CCG002852.1, |
| GO:0022402 | cell cycle process                                                      | 10 of 4104 in the list | 13 of 8404 in the genome  | 1 | CCG018249.1,CCG016878.1,CCG008308.1,CCG006063.1,CCG001795.1,CCG001794.1,CCG015077.1,CCG000839.1,CCG025057.1,CCG024595.1                                                                                                                                                                                                                                                                                                                                                                                                                                                                                                                                                                                                                                                                                                                                                                                                                                                                          |
| GO:0009968 | negative regulation of signal transduction                              | 13 of 4104 in the list | 18 of 8404 in the genome  | 1 | CCG012573.1,CCG026798.1,CCG024952.1,CCG023484.1,CCG011501.1,CCG019427.1,CCG009446.1,CCG006412.1,CCG001079.1,CCG017498.1,CCG004343.1,CCG021064.1,                                                                                                                                                                                                                                                                                                                                                                                                                                                                                                                                                                                                                                                                                                                                                                                                                                                 |
| GO:0010648 | negative regulation of cell communication                               | 13 of 4104 in the list | 18 of 8404 in the genome  | 1 | CCG012573.1,CCG026798.1,CCG024952.1,CCG023484.1,CCG011501.1,CCG019427.1,CCG009446.1,CCG006412.1,CCG001079.1,CCG017498.1,CCG004343.1,CCG021064.1,                                                                                                                                                                                                                                                                                                                                                                                                                                                                                                                                                                                                                                                                                                                                                                                                                                                 |
| GO:0023057 | negative regulation of signaling                                        | 13 of 4104 in the list | 18 of 8404 in the genome  | 1 | CCG012573.1,CCG026798.1,CCG024952.1,CCG023484.1,CCG011501.1,CCG019427.1,CCG009446.1,CCG006412.1,CCG001079.1,CCG017498.1,CCG004343.1,CCG021064.1,                                                                                                                                                                                                                                                                                                                                                                                                                                                                                                                                                                                                                                                                                                                                                                                                                                                 |
| GO:0045934 | negative regulation of nucleobase-containing compound metabolic process | 13 of 4104 in the list | 18 of 8404 in the genome  | 1 | CCG028409.1,CCG002823.1,CCG026841.1,CCG025758.1,CCG014461.1,CCG010489.1,CCG000890.1,CCG003390.1,CCG025132.1,CCG018321.1,CCG005898.1,CCG004838.1,                                                                                                                                                                                                                                                                                                                                                                                                                                                                                                                                                                                                                                                                                                                                                                                                                                                 |

|            |                                                            |                        |                          |   |                                                                                                                                                                                                                                                                                                                                                  |
|------------|------------------------------------------------------------|------------------------|--------------------------|---|--------------------------------------------------------------------------------------------------------------------------------------------------------------------------------------------------------------------------------------------------------------------------------------------------------------------------------------------------|
| GO:0048585 | negative regulation of response to stimulus                | 13 of 4104 in the list | 18 of 8404 in the genome | 1 | CCG012573.1,CCG026798.1,CCG024952.1,CCG023484.1,CCG011501.1,CCG019427.1,CCG009446.1,CCG006412.1,CCG001079.1,CCG017498.1,CCG004343.1,CCG021064.1,                                                                                                                                                                                                 |
| GO:0051172 | negative regulation of nitrogen compound metabolic process | 13 of 4104 in the list | 18 of 8404 in the genome | 1 | CCG028409.1,CCG002823.1,CCG026841.1,CCG025758.1,CCG014461.1,CCG010489.1,CCG000890.1,CCG003390.1,CCG025132.1,CCG018321.1,CCG005898.1,CCG004838.1,                                                                                                                                                                                                 |
| GO:0009260 | ribonucleotide biosynthetic process                        | 30 of 4104 in the list | 48 of 8404 in the genome | 1 | CCG015410.1,CCG002038.1,CCG025107.1,CCG009142.1,CCG017995.1,CCG023640.1,CCG026898.1,CCG026812.1,CCG000148.1,CCG006529.1,CCG025348.1,CCG013365.1,CCG025989.2,CCG019619.1,CCG018659.2,CCG005924.2,CCG008422.1,CCG013610.1,CCG013999.1,CCG021336.1,CCG016614.1,CCG028305.1,CCG010112.1,CCG007417.1,CCG017330.1,CCG006791.1,CCG021110.1,CCG007724.1, |
| GO:0032318 | regulation of Ras GTPase activity                          | 30 of 4104 in the list | 48 of 8404 in the genome | 1 | CCG016454.1,CCG021442.1,CCG022083.1,CCG025433.1,CCG022394.1,CCG016027.1,CCG011341.1,CCG019462.1,CCG012519.1,CCG004132.1,CCG017369.1,CCG024000.1,CCG025554.1,CCG016965.1,CCG022676.1,CCG013303.1,CCG027878.1,CCG024809.1,CCG009024.1,CCG007631.1,CCG015333.1,CCG002971.1,CCG016181.1,CCG013203.1,CCG018776.1,CCG002109.1,CCG021151.1,CCG010260.1, |
| GO:0046390 | ribose phosphate biosynthetic process                      | 30 of 4104 in the list | 48 of 8404 in the genome | 1 | CCG015410.1,CCG002038.1,CCG025107.1,CCG009142.1,CCG017995.1,CCG023640.1,CCG026898.1,CCG026812.1,CCG000148.1,CCG006529.1,CCG025348.1,CCG013365.1,CCG025989.2,CCG019619.1,CCG018659.2,CCG005924.2,CCG008422.1,CCG013610.1,CCG013999.1,CCG021336.1,CCG016614.1,CCG028305.1,CCG010112.1,CCG007417.1,CCG017330.1,CCG006791.1,CCG021110.1,CCG007724.1, |

|            |                                        |                         |                           |   |                                                                                                                                                                                                                                                                                                                                                                                                                                                                                                                                                                                                                                                                                                                                                                                                                                                                                                                                                                                                                                                                                                                                                                                                                                                                                                                                                                                                                                                                                                  |
|------------|----------------------------------------|-------------------------|---------------------------|---|--------------------------------------------------------------------------------------------------------------------------------------------------------------------------------------------------------------------------------------------------------------------------------------------------------------------------------------------------------------------------------------------------------------------------------------------------------------------------------------------------------------------------------------------------------------------------------------------------------------------------------------------------------------------------------------------------------------------------------------------------------------------------------------------------------------------------------------------------------------------------------------------------------------------------------------------------------------------------------------------------------------------------------------------------------------------------------------------------------------------------------------------------------------------------------------------------------------------------------------------------------------------------------------------------------------------------------------------------------------------------------------------------------------------------------------------------------------------------------------------------|
| GO:0006753 | nucleoside phosphate metabolic process | 133 of 4104 in the list | 244 of 8404 in the genome | 1 | CCG006420.1,CCG017420.1,CCG002549.1,CCG013000.1,CCG013766.1,CCG025989.2,CCG024327.1,CCG015386.1,CCG019020.1,CCG025493.1,CCG026174.1,CCG000016.1,CCG002925.1,CCG023005.1,CCG024375.1,CCG003748.1,CCG009607.1,CCG011006.1,CCG027119.1,CCG025307.1,CCG007993.1,CCG016370.1,CCG006311.1,CCG002917.1,CCG006486.1,CCG010944.1,CCG021110.1,CCG010960.2,CCG015746.1,CCG023640.1,CCG025348.1,CCG004191.1,CCG019619.1,CCG004869.1,CCG009080.1,CCG025396.1,CCG028131.1,CCG026953.1,CCG006924.1,CCG021220.1,CCG019678.1,CCG013641.1,CCG015410.1,CCG015289.1,CCG009142.1,CCG003495.1,CCG021411.1,CCG026898.1,CCG001859.1,CCG025131.2,CCG023452.1,CCG014116.1,CCG002852.1,CCG013610.1,CCG009518.1,CCG006791.1,CCG007362.1,CCG021152.1,CCG026865.1,CCG023526.2,CCG001285.1,CCG017693.1,CCG007060.1,CCG026047.1,CCG006529.1,CCG004309.1,CCG007533.1,CCG008422.1,CCG009243.1,CCG010112.1,CCG023963.3,CCG006421.1,CCG013643.1,CCG014434.1,CCG007827.1,CCG021990.1,CCG002038.1,CCG025027.1,CCG019103.1,CCG000148.1,CCG019629.2,CCG013365.1,CCG005147.1,CCG004988.1,CCG005924.2,CCG006998.1,CCG007532.1,CCG020909.1,CCG017330.1,CCG007531.1,CCG018447.1,CCG016966.1,CCG018820.3,CCG025179.1,CCG000217.1,CCG021934.1,CCG006777.1,CCG014379.1,CCG004308.1,CCG025973.1,CCG004180.1,CCG017995.1,CCG013637.1,CCG026314.1,CCG001440.1,CCG010418.1,CCG016222.1,CCG009084.2,CCG013999.1,CCG021336.1,CCG007417.1,CCG001066.1,CCG019866.1,CCG008748.1,CCG007724.1,CCG022027.1,CCG017295.1,CCG016027.1,CCG025107.1,CCG015747.1, |
| GO:0001932 | regulation of protein phosphorylation  | 17 of 4104 in the list  | 25 of 8404 in the genome  | 1 | CCG013849.1,CCG028049.1,CCG017923.1,CCG024695.1,CCG013274.1,CCG012743.1,CCG004783.1,CCG009521.1,CCG009035.1,CCG004682.1,CCG001854.1,CCG020898.1,CCG013794.1,CCG011648.1,CCG026404.1,CCG018184.1,                                                                                                                                                                                                                                                                                                                                                                                                                                                                                                                                                                                                                                                                                                                                                                                                                                                                                                                                                                                                                                                                                                                                                                                                                                                                                                 |

|            |                                            |                        |                          |   |                                                                                                                                                                                                                                                  |
|------------|--------------------------------------------|------------------------|--------------------------|---|--------------------------------------------------------------------------------------------------------------------------------------------------------------------------------------------------------------------------------------------------|
| GO:0031399 | regulation of protein modification process | 17 of 4104 in the list | 25 of 8404 in the genome | 1 | CCG013849.1,CCG028049.1,CCG017923.1,CCG024695.1,CCG013274.1,CCG012743.1,CCG004783.1,CCG009521.1,CCG009035.1,CCG004682.1,CCG001854.1,CCG020898.1,CCG013794.1,CCG011648.1,CCG026404.1,CCG018184.1,                                                 |
| GO:0043623 | cellular protein complex assembly          | 22 of 4104 in the list | 34 of 8404 in the genome | 1 | CCG006420.1,CCG009543.1,CCG015289.1,CCG013000.1,CCG013637.1,CCG002099.1,CCG016370.1,CCG010418.1,CCG005886.1,CCG005370.1,CCG009080.1,CCG010864.1,CCG002852.1,CCG009243.1,CCG025396.1,CCG007532.1,CCG002696.1,CCG007531.1,CCG018820.3,CCG008748.1, |

|            |                                    |                         |                           |   |                                                                                                                                                                                                                                                                                                                                                                                                                                                                                                                                                                                                                                                                                                                                                                                                                                                                                                                                                                                                                                                                                                                                                                                                                                                                                                                                                                                                                                                                                                  |
|------------|------------------------------------|-------------------------|---------------------------|---|--------------------------------------------------------------------------------------------------------------------------------------------------------------------------------------------------------------------------------------------------------------------------------------------------------------------------------------------------------------------------------------------------------------------------------------------------------------------------------------------------------------------------------------------------------------------------------------------------------------------------------------------------------------------------------------------------------------------------------------------------------------------------------------------------------------------------------------------------------------------------------------------------------------------------------------------------------------------------------------------------------------------------------------------------------------------------------------------------------------------------------------------------------------------------------------------------------------------------------------------------------------------------------------------------------------------------------------------------------------------------------------------------------------------------------------------------------------------------------------------------|
| GO:0009889 | regulation of biosynthetic process | 266 of 4104 in the list | 506 of 8404 in the genome | 1 | CCG022266.1,CCG008767.3,CCG008741.1,CCG003390.1,CCG027427.1,CCG007493.1,CCG021465.1,CCG003175.1,CCG023752.1,CCG018321.1,CCG028326.3,CCG013794.1,CCG006134.1,CCG009970.1,CCG016745.1,CCG021436.1,CCG016445.1,CCG012536.1,CCG000659.1,CCG027127.1,CCG018719.1,CCG015425.1,CCG027796.1,CCG022824.1,CCG018533.1,CCG024710.1,CCG022281.1,CCG011465.1,CCG006714.1,CCG020129.1,CCG027186.1,CCG011911.1,CCG000588.1,CCG022045.1,CCG013274.1,CCG028568.1,CCG007647.1,CCG021633.1,CCG012083.1,CCG000562.1,CCG005480.2,CCG017760.1,CCG005486.1,CCG016859.1,CCG020898.1,CCG017591.1,CCG002198.1,CCG021284.1,CCG016924.1,CCG000133.1,CCG013224.2,CCG002273.1,CCG001698.1,CCG023777.1,CCG014461.1,CCG026228.2,CCG005487.1,CCG021054.1,CCG016307.1,CCG009805.2,CCG016749.1,CCG028465.1,CCG019250.1,CCG005396.1,CCG025747.1,CCG009823.1,CCG021456.1,CCG014928.1,CCG005168.1,CCG018184.1,CCG018315.1,CCG027580.1,CCG024271.1,CCG025758.1,CCG009458.1,CCG022496.1,CCG015062.1,CCG018164.1,CCG001301.1,CCG023199.2,CCG001431.2,CCG001341.1,CCG022398.1,CCG021521.1,CCG009562.2,CCG010139.1,CCG021940.1,CCG024639.1,CCG015846.1,CCG008833.1,CCG018168.1,CCG014509.1,CCG004783.1,CCG025691.1,CCG018042.1,CCG014463.1,CCG026788.1,CCG020543.1,CCG025549.1,CCG011015.1,CCG027950.1,CCG025572.1,CCG002045.1,CCG004378.1,CCG014243.1,CCG009023.1,CCG018847.1,CCG014323.1,CCG027258.1,CCG008371.1,CCG022947.1,CCG008742.1,CCG011228.1,CCG004762.2,CCG028421.1,CCG003427.1,CCG026259.1,CCG005635.1,CCG020695.1,CCG000593.1, |
|------------|------------------------------------|-------------------------|---------------------------|---|--------------------------------------------------------------------------------------------------------------------------------------------------------------------------------------------------------------------------------------------------------------------------------------------------------------------------------------------------------------------------------------------------------------------------------------------------------------------------------------------------------------------------------------------------------------------------------------------------------------------------------------------------------------------------------------------------------------------------------------------------------------------------------------------------------------------------------------------------------------------------------------------------------------------------------------------------------------------------------------------------------------------------------------------------------------------------------------------------------------------------------------------------------------------------------------------------------------------------------------------------------------------------------------------------------------------------------------------------------------------------------------------------------------------------------------------------------------------------------------------------|



|            |                                                  |                         |                           |   |                                                                                                                                                                                                                                                                                                                                                                                                                                                                                                                                                                                                                                                                                                                                                                                                                                                                                                                                                                                                                                                                                                                                                                                                                                                                                                                                                                                                                                                                                                  |
|------------|--------------------------------------------------|-------------------------|---------------------------|---|--------------------------------------------------------------------------------------------------------------------------------------------------------------------------------------------------------------------------------------------------------------------------------------------------------------------------------------------------------------------------------------------------------------------------------------------------------------------------------------------------------------------------------------------------------------------------------------------------------------------------------------------------------------------------------------------------------------------------------------------------------------------------------------------------------------------------------------------------------------------------------------------------------------------------------------------------------------------------------------------------------------------------------------------------------------------------------------------------------------------------------------------------------------------------------------------------------------------------------------------------------------------------------------------------------------------------------------------------------------------------------------------------------------------------------------------------------------------------------------------------|
| GO:0010556 | regulation of macromolecule biosynthetic process | 266 of 4104 in the list | 506 of 8404 in the genome | 1 | CCG022266.1,CCG008767.3,CCG008741.1,CCG003390.1,CCG027427.1,CCG007493.1,CCG021465.1,CCG003175.1,CCG023752.1,CCG018321.1,CCG028326.3,CCG013794.1,CCG006134.1,CCG009970.1,CCG016745.1,CCG021436.1,CCG016445.1,CCG012536.1,CCG000659.1,CCG027127.1,CCG018719.1,CCG015425.1,CCG027796.1,CCG022824.1,CCG018533.1,CCG024710.1,CCG022281.1,CCG011465.1,CCG006714.1,CCG020129.1,CCG027186.1,CCG011911.1,CCG000588.1,CCG022045.1,CCG013274.1,CCG028568.1,CCG007647.1,CCG021633.1,CCG012083.1,CCG000562.1,CCG005480.2,CCG017760.1,CCG005486.1,CCG016859.1,CCG020898.1,CCG017591.1,CCG002198.1,CCG021284.1,CCG016924.1,CCG000133.1,CCG013224.2,CCG002273.1,CCG001698.1,CCG023777.1,CCG014461.1,CCG026228.2,CCG005487.1,CCG021054.1,CCG016307.1,CCG009805.2,CCG016749.1,CCG028465.1,CCG019250.1,CCG005396.1,CCG025747.1,CCG009823.1,CCG021456.1,CCG014928.1,CCG005168.1,CCG018184.1,CCG018315.1,CCG027580.1,CCG024271.1,CCG025758.1,CCG009458.1,CCG022496.1,CCG015062.1,CCG018164.1,CCG001301.1,CCG023199.2,CCG001431.2,CCG001341.1,CCG022398.1,CCG021521.1,CCG009562.2,CCG010139.1,CCG021940.1,CCG024639.1,CCG015846.1,CCG008833.1,CCG018168.1,CCG014509.1,CCG004783.1,CCG025691.1,CCG018042.1,CCG014463.1,CCG026788.1,CCG020543.1,CCG025549.1,CCG011015.1,CCG027950.1,CCG025572.1,CCG002045.1,CCG004378.1,CCG014243.1,CCG009023.1,CCG018847.1,CCG014323.1,CCG027258.1,CCG008371.1,CCG022947.1,CCG008742.1,CCG011228.1,CCG004762.2,CCG028421.1,CCG003427.1,CCG026259.1,CCG005635.1,CCG020695.1,CCG000593.1, |
|------------|--------------------------------------------------|-------------------------|---------------------------|---|--------------------------------------------------------------------------------------------------------------------------------------------------------------------------------------------------------------------------------------------------------------------------------------------------------------------------------------------------------------------------------------------------------------------------------------------------------------------------------------------------------------------------------------------------------------------------------------------------------------------------------------------------------------------------------------------------------------------------------------------------------------------------------------------------------------------------------------------------------------------------------------------------------------------------------------------------------------------------------------------------------------------------------------------------------------------------------------------------------------------------------------------------------------------------------------------------------------------------------------------------------------------------------------------------------------------------------------------------------------------------------------------------------------------------------------------------------------------------------------------------|

|            |                                             |                         |                           |   |                                                                                                                                                                                                                                                                                                                                                                                                                                                                                                                                                                                                                                                                                                                                                                                                                                                                                                                                                                                                                                                                                                                                                                                                                                                                                                                                                                                                                                                                                                  |
|------------|---------------------------------------------|-------------------------|---------------------------|---|--------------------------------------------------------------------------------------------------------------------------------------------------------------------------------------------------------------------------------------------------------------------------------------------------------------------------------------------------------------------------------------------------------------------------------------------------------------------------------------------------------------------------------------------------------------------------------------------------------------------------------------------------------------------------------------------------------------------------------------------------------------------------------------------------------------------------------------------------------------------------------------------------------------------------------------------------------------------------------------------------------------------------------------------------------------------------------------------------------------------------------------------------------------------------------------------------------------------------------------------------------------------------------------------------------------------------------------------------------------------------------------------------------------------------------------------------------------------------------------------------|
| GO:0031326 | regulation of cellular biosynthetic process | 266 of 4104 in the list | 506 of 8404 in the genome | 1 | CCG022266.1,CCG008767.3,CCG008741.1,CCG003390.1,CCG027427.1,CCG007493.1,CCG021465.1,CCG003175.1,CCG023752.1,CCG018321.1,CCG028326.3,CCG013794.1,CCG006134.1,CCG009970.1,CCG016745.1,CCG021436.1,CCG016445.1,CCG012536.1,CCG000659.1,CCG027127.1,CCG018719.1,CCG015425.1,CCG027796.1,CCG022824.1,CCG018533.1,CCG024710.1,CCG022281.1,CCG011465.1,CCG006714.1,CCG020129.1,CCG027186.1,CCG011911.1,CCG000588.1,CCG022045.1,CCG013274.1,CCG028568.1,CCG007647.1,CCG021633.1,CCG012083.1,CCG000562.1,CCG005480.2,CCG017760.1,CCG005486.1,CCG016859.1,CCG020898.1,CCG017591.1,CCG002198.1,CCG021284.1,CCG016924.1,CCG000133.1,CCG013224.2,CCG002273.1,CCG001698.1,CCG023777.1,CCG014461.1,CCG026228.2,CCG005487.1,CCG021054.1,CCG016307.1,CCG009805.2,CCG016749.1,CCG028465.1,CCG019250.1,CCG005396.1,CCG025747.1,CCG009823.1,CCG021456.1,CCG014928.1,CCG005168.1,CCG018184.1,CCG018315.1,CCG027580.1,CCG024271.1,CCG025758.1,CCG009458.1,CCG022496.1,CCG015062.1,CCG018164.1,CCG001301.1,CCG023199.2,CCG001431.2,CCG001341.1,CCG022398.1,CCG021521.1,CCG009562.2,CCG010139.1,CCG021940.1,CCG024639.1,CCG015846.1,CCG008833.1,CCG018168.1,CCG014509.1,CCG004783.1,CCG025691.1,CCG018042.1,CCG014463.1,CCG026788.1,CCG020543.1,CCG025549.1,CCG011015.1,CCG027950.1,CCG025572.1,CCG002045.1,CCG004378.1,CCG014243.1,CCG009023.1,CCG018847.1,CCG014323.1,CCG027258.1,CCG008371.1,CCG022947.1,CCG008742.1,CCG011228.1,CCG004762.2,CCG028421.1,CCG003427.1,CCG026259.1,CCG005635.1,CCG020695.1,CCG000593.1, |
|------------|---------------------------------------------|-------------------------|---------------------------|---|--------------------------------------------------------------------------------------------------------------------------------------------------------------------------------------------------------------------------------------------------------------------------------------------------------------------------------------------------------------------------------------------------------------------------------------------------------------------------------------------------------------------------------------------------------------------------------------------------------------------------------------------------------------------------------------------------------------------------------------------------------------------------------------------------------------------------------------------------------------------------------------------------------------------------------------------------------------------------------------------------------------------------------------------------------------------------------------------------------------------------------------------------------------------------------------------------------------------------------------------------------------------------------------------------------------------------------------------------------------------------------------------------------------------------------------------------------------------------------------------------|

|            |                                                           |                         |                           |   |                                                                                                                                                                                                                                                                                                                                                                                                                                                                                                                                                                                                                                                                                                                                                                                                                                                                                                                                                                                                                                                                                                                                                                                                                                                                                                                                                                                                                                                                                                  |
|------------|-----------------------------------------------------------|-------------------------|---------------------------|---|--------------------------------------------------------------------------------------------------------------------------------------------------------------------------------------------------------------------------------------------------------------------------------------------------------------------------------------------------------------------------------------------------------------------------------------------------------------------------------------------------------------------------------------------------------------------------------------------------------------------------------------------------------------------------------------------------------------------------------------------------------------------------------------------------------------------------------------------------------------------------------------------------------------------------------------------------------------------------------------------------------------------------------------------------------------------------------------------------------------------------------------------------------------------------------------------------------------------------------------------------------------------------------------------------------------------------------------------------------------------------------------------------------------------------------------------------------------------------------------------------|
| GO:2000112 | regulation of cellular macromolecule biosynthetic process | 266 of 4104 in the list | 506 of 8404 in the genome | 1 | CCG022266.1,CCG008767.3,CCG008741.1,CCG003390.1,CCG027427.1,CCG007493.1,CCG021465.1,CCG003175.1,CCG023752.1,CCG018321.1,CCG028326.3,CCG013794.1,CCG006134.1,CCG009970.1,CCG016745.1,CCG021436.1,CCG016445.1,CCG012536.1,CCG000659.1,CCG027127.1,CCG018719.1,CCG015425.1,CCG027796.1,CCG022824.1,CCG018533.1,CCG024710.1,CCG022281.1,CCG011465.1,CCG006714.1,CCG020129.1,CCG027186.1,CCG011911.1,CCG000588.1,CCG022045.1,CCG013274.1,CCG028568.1,CCG007647.1,CCG021633.1,CCG012083.1,CCG000562.1,CCG005480.2,CCG017760.1,CCG005486.1,CCG016859.1,CCG020898.1,CCG017591.1,CCG002198.1,CCG021284.1,CCG016924.1,CCG000133.1,CCG013224.2,CCG002273.1,CCG001698.1,CCG023777.1,CCG014461.1,CCG026228.2,CCG005487.1,CCG021054.1,CCG016307.1,CCG009805.2,CCG016749.1,CCG028465.1,CCG019250.1,CCG005396.1,CCG025747.1,CCG009823.1,CCG021456.1,CCG014928.1,CCG005168.1,CCG018184.1,CCG018315.1,CCG027580.1,CCG024271.1,CCG025758.1,CCG009458.1,CCG022496.1,CCG015062.1,CCG018164.1,CCG001301.1,CCG023199.2,CCG001431.2,CCG001341.1,CCG022398.1,CCG021521.1,CCG009562.2,CCG010139.1,CCG021940.1,CCG024639.1,CCG015846.1,CCG008833.1,CCG018168.1,CCG014509.1,CCG004783.1,CCG025691.1,CCG018042.1,CCG014463.1,CCG026788.1,CCG020543.1,CCG025549.1,CCG011015.1,CCG027950.1,CCG025572.1,CCG002045.1,CCG004378.1,CCG014243.1,CCG009023.1,CCG018847.1,CCG014323.1,CCG027258.1,CCG008371.1,CCG022947.1,CCG008742.1,CCG011228.1,CCG004762.2,CCG028421.1,CCG003427.1,CCG026259.1,CCG005635.1,CCG020695.1,CCG000593.1, |
|------------|-----------------------------------------------------------|-------------------------|---------------------------|---|--------------------------------------------------------------------------------------------------------------------------------------------------------------------------------------------------------------------------------------------------------------------------------------------------------------------------------------------------------------------------------------------------------------------------------------------------------------------------------------------------------------------------------------------------------------------------------------------------------------------------------------------------------------------------------------------------------------------------------------------------------------------------------------------------------------------------------------------------------------------------------------------------------------------------------------------------------------------------------------------------------------------------------------------------------------------------------------------------------------------------------------------------------------------------------------------------------------------------------------------------------------------------------------------------------------------------------------------------------------------------------------------------------------------------------------------------------------------------------------------------|

|            |                                                   |                        |                          |   |                                                                                                                                                                                                                                                                                                                                                                                                             |
|------------|---------------------------------------------------|------------------------|--------------------------|---|-------------------------------------------------------------------------------------------------------------------------------------------------------------------------------------------------------------------------------------------------------------------------------------------------------------------------------------------------------------------------------------------------------------|
| GO:0009894 | regulation of catabolic process                   | 33 of 4104 in the list | 54 of 8404 in the genome | 1 | CCG016454.1,CCG021442.1,CCG022083.1,CCG025433.1,CCG022394.1,CCG016027.1,CCG011341.1,CCG019462.1,CCG012519.1,CCG004132.1,CCG003824.3,CCG017369.1,CCG024000.1,CCG025554.1,CCG016965.1,CCG022676.1,CCG013303.1,CCG027878.1,CCG024809.1,CCG009024.1,CCG007631.1,CCG023747.3,CCG015333.1,CCG002971.1,CCG016181.1,CCG013203.1,CCG018776.1,CCG002109.1,CCG021151.1,CCG015233.1,CCG010260.1,CCG002864.1,CCG005105.1 |
| GO:0009893 | positive regulation of metabolic process          | 8 of 4104 in the list  | 10 of 8404 in the genome | 1 | CCG018164.1,CCG026216.1,CCG021944.1,CCG026155.1,CCG023747.3,CCG015233.1,CCG027118.1,CCG003824.3                                                                                                                                                                                                                                                                                                             |
| GO:0031325 | positive regulation of cellular metabolic process | 8 of 4104 in the list  | 10 of 8404 in the genome | 1 | CCG018164.1,CCG026216.1,CCG021944.1,CCG026155.1,CCG023747.3,CCG015233.1,CCG027118.1,CCG003824.3                                                                                                                                                                                                                                                                                                             |
| GO:0009069 | serine family amino acid metabolic process        | 18 of 4104 in the list | 27 of 8404 in the genome | 1 | CCG019954.3,CCG025465.1,CCG010111.1,CCG018907.1,CCG020154.1,CCG022025.2,CCG025636.2,CCG017201.1,CCG025108.1,CCG006994.1,CCG001082.1,CCG028131.1,CCG008510.1,CCG019834.1,CCG015568.1,CCG003063.1,                                                                                                                                                                                                            |
| GO:0042325 | regulation of phosphorylation                     | 18 of 4104 in the list | 27 of 8404 in the genome | 1 | CCG013849.1,CCG028049.1,CCG017923.1,CCG024695.1,CCG013274.1,CCG012743.1,CCG004783.1,CCG009521.1,CCG009035.1,CCG004682.1,CCG001854.1,CCG020898.1,CCG013794.1,CCG011162.1,CCG011648.1,CCG026404.1,                                                                                                                                                                                                            |

|            |                              |                         |                           |   |                                                                                                                                                                                                                                                                                                                                                                                                                                                                                                                                                                                                                                                                                                                                                                                                                                                                                                                                                                                                                                                                                                                                                                                                  |
|------------|------------------------------|-------------------------|---------------------------|---|--------------------------------------------------------------------------------------------------------------------------------------------------------------------------------------------------------------------------------------------------------------------------------------------------------------------------------------------------------------------------------------------------------------------------------------------------------------------------------------------------------------------------------------------------------------------------------------------------------------------------------------------------------------------------------------------------------------------------------------------------------------------------------------------------------------------------------------------------------------------------------------------------------------------------------------------------------------------------------------------------------------------------------------------------------------------------------------------------------------------------------------------------------------------------------------------------|
| GO:0009116 | nucleoside metabolic process | 102 of 4104 in the list | 185 of 8404 in the genome | 1 | CCG006420.1,CCG017420.1,CCG002549.1,CCG017693.1,CCG007060.1,CCG013000.1,CCG017331.1,CCG017175.1,CCG004309.1,CCG006529.1,CCG025989.2,CCG024327.1,CCG007533.1,CCG015386.1,CCG019020.1,CCG009243.1,CCG008422.1,CCG010112.1,CCG009607.1,CCG011006.1,CCG007827.1,CCG014434.1,CCG013643.1,CCG006421.1,CCG023963.3,CCG002038.1,CCG025027.1,CCG016370.1,CCG000148.1,CCG019103.1,CCG019629.2,CCG002917.1,CCG006486.1,CCG005924.2,CCG025940.1,CCG020909.1,CCG007532.1,CCG018447.1,CCG007531.1,CCG016966.1,CCG018820.3,CCG016415.1,CCG021110.1,CCG025179.1,CCG021934.1,CCG006777.1,CCG004308.1,CCG025973.1,CCG017995.1,CCG013637.1,CCG023640.1,CCG026314.1,CCG010418.1,CCG025348.1,CCG019619.1,CCG009080.1,CCG004869.1,CCG009801.1,CCG025396.1,CCG021336.1,CCG013999.1,CCG026953.1,CCG006924.1,CCG007417.1,CCG021220.1,CCG009165.1,CCG001066.1,CCG004440.1,CCG019866.1,CCG019678.1,CCG007724.1,CCG008748.1,CCG003677.1,CCG010460.1,CCG013641.1,CCG015410.1,CCG016027.1,CCG015289.1,CCG025107.1,CCG009142.1,CCG003495.1,CCG021411.1,CCG001859.1,CCG026812.1,CCG026336.1,CCG005886.1,CCG025131.2,CCG016542.1,CCG026154.1,CCG015654.1,CCG018659.2,CCG002852.1,CCG010864.1,CCG013610.1,CCG010986.1,CCG016614.1, |
|------------|------------------------------|-------------------------|---------------------------|---|--------------------------------------------------------------------------------------------------------------------------------------------------------------------------------------------------------------------------------------------------------------------------------------------------------------------------------------------------------------------------------------------------------------------------------------------------------------------------------------------------------------------------------------------------------------------------------------------------------------------------------------------------------------------------------------------------------------------------------------------------------------------------------------------------------------------------------------------------------------------------------------------------------------------------------------------------------------------------------------------------------------------------------------------------------------------------------------------------------------------------------------------------------------------------------------------------|

|            |                                            |                         |                           |   |                                                                                                                                                                                                                                                                                                                                                                                                                                                                                                                                                                                                                                                                                                                                                                                                                                                                                                                                                                                                                                                                                                                                                                                                  |
|------------|--------------------------------------------|-------------------------|---------------------------|---|--------------------------------------------------------------------------------------------------------------------------------------------------------------------------------------------------------------------------------------------------------------------------------------------------------------------------------------------------------------------------------------------------------------------------------------------------------------------------------------------------------------------------------------------------------------------------------------------------------------------------------------------------------------------------------------------------------------------------------------------------------------------------------------------------------------------------------------------------------------------------------------------------------------------------------------------------------------------------------------------------------------------------------------------------------------------------------------------------------------------------------------------------------------------------------------------------|
| GO:1901657 | glycosyl compound metabolic process        | 102 of 4104 in the list | 185 of 8404 in the genome | 1 | CCG006420.1,CCG017420.1,CCG002549.1,CCG017693.1,CCG007060.1,CCG013000.1,CCG017331.1,CCG017175.1,CCG004309.1,CCG006529.1,CCG025989.2,CCG024327.1,CCG007533.1,CCG015386.1,CCG019020.1,CCG009243.1,CCG008422.1,CCG010112.1,CCG009607.1,CCG011006.1,CCG007827.1,CCG014434.1,CCG013643.1,CCG006421.1,CCG023963.3,CCG002038.1,CCG025027.1,CCG016370.1,CCG000148.1,CCG019103.1,CCG019629.2,CCG002917.1,CCG006486.1,CCG005924.2,CCG025940.1,CCG020909.1,CCG007532.1,CCG018447.1,CCG007531.1,CCG016966.1,CCG018820.3,CCG016415.1,CCG021110.1,CCG025179.1,CCG021934.1,CCG006777.1,CCG004308.1,CCG025973.1,CCG017995.1,CCG013637.1,CCG023640.1,CCG026314.1,CCG010418.1,CCG025348.1,CCG019619.1,CCG009080.1,CCG004869.1,CCG009801.1,CCG025396.1,CCG021336.1,CCG013999.1,CCG026953.1,CCG006924.1,CCG007417.1,CCG021220.1,CCG009165.1,CCG001066.1,CCG004440.1,CCG019866.1,CCG019678.1,CCG007724.1,CCG008748.1,CCG003677.1,CCG010460.1,CCG013641.1,CCG015410.1,CCG016027.1,CCG015289.1,CCG025107.1,CCG009142.1,CCG003495.1,CCG021411.1,CCG001859.1,CCG026812.1,CCG026336.1,CCG005886.1,CCG025131.2,CCG016542.1,CCG026154.1,CCG015654.1,CCG018659.2,CCG002852.1,CCG010864.1,CCG013610.1,CCG010986.1,CCG016614.1, |
| GO:0009152 | purine ribonucleotide biosynthetic process | 28 of 4104 in the list  | 45 of 8404 in the genome  | 1 | CCG015410.1,CCG002038.1,CCG025107.1,CCG009142.1,CCG017995.1,CCG023640.1,CCG026898.1,CCG026812.1,CCG000148.1,CCG006529.1,CCG025348.1,CCG013365.1,CCG025989.2,CCG019619.1,CCG018659.2,CCG005924.2,CCG008422.1,CCG013999.1,CCG021336.1,CCG028305.1,CCG010112.1,CCG007417.1,CCG017330.1,CCG006791.1,CCG021110.1,CCG007724.1,CCG021934.1,CCG013643.1                                                                                                                                                                                                                                                                                                                                                                                                                                                                                                                                                                                                                                                                                                                                                                                                                                                  |
| GO:0006417 | regulation of translation                  | 11 of 4104 in the list  | 15 of 8404 in the genome  | 1 | CCG003216.1,CCG003765.1,CCG016445.1,CCG005486.1,CCG006714.1,CCG015062.1,CCG026155.1,CCG005487.1,CCG005485.1,CCG023431.1,CCG016835.2                                                                                                                                                                                                                                                                                                                                                                                                                                                                                                                                                                                                                                                                                                                                                                                                                                                                                                                                                                                                                                                              |

|            |                                                   |                        |                           |   |                                                                                                                                                                                                                                                                                                                                                                                                                                                                                                                                                                                                                                                                                                                                                                                                                                                                                                                                                                                                                                                                                                  |
|------------|---------------------------------------------------|------------------------|---------------------------|---|--------------------------------------------------------------------------------------------------------------------------------------------------------------------------------------------------------------------------------------------------------------------------------------------------------------------------------------------------------------------------------------------------------------------------------------------------------------------------------------------------------------------------------------------------------------------------------------------------------------------------------------------------------------------------------------------------------------------------------------------------------------------------------------------------------------------------------------------------------------------------------------------------------------------------------------------------------------------------------------------------------------------------------------------------------------------------------------------------|
| GO:0010608 | posttranscriptional regulation of gene expression | 11 of 4104 in the list | 15 of 8404 in the genome  | 1 | CCG003216.1,CCG003765.1,CCG016445.1,CCG005486.1,CCG006714.1,CCG015062.1,CCG026155.1,CCG005487.1,CCG005485.1,CCG023431.1,CCG016835.2                                                                                                                                                                                                                                                                                                                                                                                                                                                                                                                                                                                                                                                                                                                                                                                                                                                                                                                                                              |
| GO:0006006 | glucose metabolic process                         | 23 of 4104 in the list | 36 of 8404 in the genome  | 1 | CCG022035.1,CCG020616.1,CCG005588.1,CCG003215.3,CCG028524.1,CCG025307.1,CCG010373.1,CCG007981.1,CCG007023.1,CCG022214.1,CCG012840.1,CCG017278.1,CCG000431.1,CCG004388.1,CCG013339.1,CCG009084.2,CCG019953.1,CCG017200.1,CCG003220.2,CCG006203.1,CCG022453.1,CCG025277.1,CCG003748.1                                                                                                                                                                                                                                                                                                                                                                                                                                                                                                                                                                                                                                                                                                                                                                                                              |
| GO:0071822 | protein complex subunit organization              | 92 of 4104 in the list | 166 of 8404 in the genome | 1 | CCG006420.1,CCG013000.1,CCG003361.1,CCG019284.1,CCG008560.1,CCG010136.1,CCG021491.1,CCG010647.1,CCG003310.1,CCG005370.1,CCG009243.1,CCG013617.1,CCG000433.1,CCG026473.1,CCG012476.1,CCG002696.1,CCG014537.1,CCG010137.1,CCG006421.1,CCG023963.3,CCG005194.1,CCG009461.1,CCG024623.1,CCG025880.1,CCG014836.1,CCG010904.1,CCG024177.1,CCG004481.1,CCG012514.1,CCG027196.1,CCG014772.1,CCG002099.1,CCG026474.1,CCG016370.1,CCG025893.1,CCG009637.1,CCG007532.1,CCG010905.1,CCG007531.1,CCG018820.3,CCG026579.1,CCG010909.1,CCG010648.1,CCG017580.1,CCG013637.1,CCG009980.1,CCG010906.1,CCG015968.1,CCG018893.1,CCG010649.1,CCG010138.1,CCG010418.1,CCG008892.2,CCG025877.1,CCG015560.1,CCG027199.1,CCG009080.1,CCG027198.1,CCG025396.1,CCG008559.1,CCG018287.1,CCG027696.1,CCG010907.1,CCG008748.1,CCG012229.1,CCG010650.1,CCG000708.1,CCG025990.1,CCG024624.1,CCG009543.1,CCG009275.1,CCG004494.1,CCG002947.1,CCG015289.1,CCG010908.1,CCG005716.1,CCG027197.1,CCG022673.1,CCG005886.1,CCG026159.1,CCG027697.1,CCG020442.1,CCG010646.1,CCG017598.1,CCG002852.1,CCG010864.1,CCG024787.1,CCG027695.1, |

|            |                              |                         |                           |   |                                                                                                                                                                                                                                                                                                                                                                                                                                                                                                                                                                                                                                                                                                                                                                                                                                                                                                                                                                                                                                                                                                                                                                                                                                                                                                                                                                                                                                                  |
|------------|------------------------------|-------------------------|---------------------------|---|--------------------------------------------------------------------------------------------------------------------------------------------------------------------------------------------------------------------------------------------------------------------------------------------------------------------------------------------------------------------------------------------------------------------------------------------------------------------------------------------------------------------------------------------------------------------------------------------------------------------------------------------------------------------------------------------------------------------------------------------------------------------------------------------------------------------------------------------------------------------------------------------------------------------------------------------------------------------------------------------------------------------------------------------------------------------------------------------------------------------------------------------------------------------------------------------------------------------------------------------------------------------------------------------------------------------------------------------------------------------------------------------------------------------------------------------------|
| GO:0009117 | nucleotide metabolic process | 126 of 4104 in the list | 232 of 8404 in the genome | 1 | CCG006420.1,CCG017420.1,CCG002549.1,CCG017693.1,CCG007060.1,CCG013000.1,CCG026047.1,CCG013766.1,CCG004309.1,CCG006529.1,CCG025989.2,CCG024327.1,CCG015386.1,CCG019020.1,CCG009243.1,CCG008422.1,CCG025493.1,CCG026174.1,CCG000016.1,CCG010112.1,CCG002925.1,CCG023005.1,CCG024375.1,CCG003748.1,CCG009607.1,CCG011006.1,CCG027119.1,CCG007827.1,CCG014434.1,CCG013643.1,CCG006421.1,CCG023963.3,CCG021990.1,CCG002038.1,CCG025027.1,CCG025307.1,CCG007993.1,CCG016370.1,CCG000148.1,CCG019103.1,CCG013365.1,CCG019629.2,CCG006311.1,CCG002917.1,CCG005147.1,CCG006486.1,CCG005924.2,CCG004988.1,CCG006998.1,CCG020909.1,CCG007532.1,CCG018447.1,CCG007531.1,CCG017330.1,CCG016966.1,CCG018820.3,CCG010944.1,CCG021110.1,CCG010960.2,CCG025179.1,CCG021934.1,CCG006777.1,CCG004308.1,CCG014379.1,CCG025973.1,CCG017995.1,CCG004180.1,CCG013637.1,CCG023640.1,CCG001440.1,CCG026314.1,CCG010418.1,CCG025348.1,CCG016222.1,CCG019619.1,CCG004869.1,CCG009080.1,CCG009084.2,CCG025396.1,CCG021336.1,CCG013999.1,CCG026953.1,CCG028131.1,CCG006924.1,CCG007417.1,CCG021220.1,CCG001066.1,CCG019866.1,CCG019678.1,CCG007724.1,CCG008748.1,CCG022027.1,CCG013641.1,CCG015410.1,CCG016027.1,CCG015289.1,CCG025107.1,CCG009142.1,CCG003495.1,CCG021411.1,CCG026898.1,CCG001859.1,CCG026812.1,CCG026336.1,CCG005886.1,CCG025131.2,CCG016542.1,CCG023452.1,CCG026154.1,CCG015654.1,CCG018659.2,CCG014116.1,CCG002852.1,CCG010864.1,CCG001445.1,CCG013610.1, |
|------------|------------------------------|-------------------------|---------------------------|---|--------------------------------------------------------------------------------------------------------------------------------------------------------------------------------------------------------------------------------------------------------------------------------------------------------------------------------------------------------------------------------------------------------------------------------------------------------------------------------------------------------------------------------------------------------------------------------------------------------------------------------------------------------------------------------------------------------------------------------------------------------------------------------------------------------------------------------------------------------------------------------------------------------------------------------------------------------------------------------------------------------------------------------------------------------------------------------------------------------------------------------------------------------------------------------------------------------------------------------------------------------------------------------------------------------------------------------------------------------------------------------------------------------------------------------------------------|



|            |                                   |                        |                           |   |                                                                                                                                                                                                                                                                                                                                                                                                                                                                                                                                                                                                                                                                                                                                                                                                                                                 |
|------------|-----------------------------------|------------------------|---------------------------|---|-------------------------------------------------------------------------------------------------------------------------------------------------------------------------------------------------------------------------------------------------------------------------------------------------------------------------------------------------------------------------------------------------------------------------------------------------------------------------------------------------------------------------------------------------------------------------------------------------------------------------------------------------------------------------------------------------------------------------------------------------------------------------------------------------------------------------------------------------|
| GO:0006333 | chromatin assembly or disassembly | 70 of 4104 in the list | 124 of 8404 in the genome | 1 | CCG003361.1,CCG019284.1,CCG008560.1,CCG010136.1,CCG021491.1,CCG010647.1,CCG003310.1,CCG013617.1,CCG000433.1,CCG026473.1,CCG012476.1,CCG014537.1,CCG010137.1,CCG009461.1,CCG005194.1,CCG024623.1,CCG025880.1,CCG014836.1,CCG010904.1,CCG024177.1,CCG004481.1,CCG012514.1,CCG027196.1,CCG014772.1,CCG026474.1,CCG025893.1,CCG009637.1,CCG010905.1,CCG026579.1,CCG010909.1,CCG010648.1,CCG017580.1,CCG009980.1,CCG010906.1,CCG015968.1,CCG018893.1,CCG010138.1,CCG010649.1,CCG018767.1,CCG008892.2,CCG025877.1,CCG015560.1,CCG027199.1,CCG027198.1,CCG018287.1,CCG008559.1,CCG027696.1,CCG010907.1,CCG012229.1,CCG010650.1,CCG000708.1,CCG025990.1,CCG024624.1,CCG009275.1,CCG004494.1,CCG002947.1,CCG010908.1,CCG005716.1,CCG027197.1,CCG022673.1,CCG027697.1,CCG026159.1,CCG020442.1,CCG010646.1,CCG017598.1,CCG024787.1,CCG027695.1,CCG012584.1 |
|------------|-----------------------------------|------------------------|---------------------------|---|-------------------------------------------------------------------------------------------------------------------------------------------------------------------------------------------------------------------------------------------------------------------------------------------------------------------------------------------------------------------------------------------------------------------------------------------------------------------------------------------------------------------------------------------------------------------------------------------------------------------------------------------------------------------------------------------------------------------------------------------------------------------------------------------------------------------------------------------------|

|            |                                             |                        |                           |   |                                                                                                                                                                                                                                                                                                                                                                                                                                                                                                                                                                                                                                                                                                                                                                                                                                                                                                                                                                                                                                                                                                                                                  |
|------------|---------------------------------------------|------------------------|---------------------------|---|--------------------------------------------------------------------------------------------------------------------------------------------------------------------------------------------------------------------------------------------------------------------------------------------------------------------------------------------------------------------------------------------------------------------------------------------------------------------------------------------------------------------------------------------------------------------------------------------------------------------------------------------------------------------------------------------------------------------------------------------------------------------------------------------------------------------------------------------------------------------------------------------------------------------------------------------------------------------------------------------------------------------------------------------------------------------------------------------------------------------------------------------------|
| GO:0043933 | macromolecular complex subunit organization | 95 of 4104 in the list | 172 of 8404 in the genome | 1 | CCG006420.1,CCG013000.1,CCG003361.1,CCG019284.1,CCG008560.1,CCG010136.1,CCG021491.1,CCG010647.1,CCG003310.1,CCG005370.1,CCG009243.1,CCG013617.1,CCG000433.1,CCG026473.1,CCG012476.1,CCG002696.1,CCG014537.1,CCG010137.1,CCG006421.1,CCG023963.3,CCG005194.1,CCG009461.1,CCG024623.1,CCG025880.1,CCG014836.1,CCG010904.1,CCG024177.1,CCG004481.1,CCG012514.1,CCG027196.1,CCG014772.1,CCG002099.1,CCG026474.1,CCG016370.1,CCG010792.1,CCG025893.1,CCG009637.1,CCG007532.1,CCG010905.1,CCG007531.1,CCG018820.3,CCG026579.1,CCG010909.1,CCG010648.1,CCG017580.1,CCG013637.1,CCG009980.1,CCG010906.1,CCG015968.1,CCG018893.1,CCG010649.1,CCG010138.1,CCG025877.1,CCG010418.1,CCG008892.2,CCG015560.1,CCG027199.1,CCG009080.1,CCG027198.1,CCG025396.1,CCG008559.1,CCG018287.1,CCG027696.1,CCG010907.1,CCG008748.1,CCG012229.1,CCG010650.1,CCG000708.1,CCG025990.1,CCG024624.1,CCG009543.1,CCG009275.1,CCG004494.1,CCG002947.1,CCG015289.1,CCG010908.1,CCG005716.1,CCG007518.1,CCG027197.1,CCG022673.1,CCG005886.1,CCG026159.1,CCG027697.1,CCG020442.1,CCG010646.1,CCG017598.1,CCG002852.1,CCG010864.1,CCG024787.1,CCG027695.1,CCG000915.1,CCG012584.1, |
|------------|---------------------------------------------|------------------------|---------------------------|---|--------------------------------------------------------------------------------------------------------------------------------------------------------------------------------------------------------------------------------------------------------------------------------------------------------------------------------------------------------------------------------------------------------------------------------------------------------------------------------------------------------------------------------------------------------------------------------------------------------------------------------------------------------------------------------------------------------------------------------------------------------------------------------------------------------------------------------------------------------------------------------------------------------------------------------------------------------------------------------------------------------------------------------------------------------------------------------------------------------------------------------------------------|

|            |                                                  |                        |                           |   |                                                                                                                                                                                                                                                                                                                                                                                                                                                                                                                                                                                                                                                                                                                                                                                                                                                                                                                                                                                                  |
|------------|--------------------------------------------------|------------------------|---------------------------|---|--------------------------------------------------------------------------------------------------------------------------------------------------------------------------------------------------------------------------------------------------------------------------------------------------------------------------------------------------------------------------------------------------------------------------------------------------------------------------------------------------------------------------------------------------------------------------------------------------------------------------------------------------------------------------------------------------------------------------------------------------------------------------------------------------------------------------------------------------------------------------------------------------------------------------------------------------------------------------------------------------|
| GO:0009144 | purine nucleoside triphosphate metabolic process | 82 of 4104 in the list | 147 of 8404 in the genome | 1 | CCG006420.1,CCG017420.1,CCG002549.1,CCG017693.1,CCG007060.1,CCG013000.1,CCG004309.1,CCG006529.1,CCG025989.2,CCG024327.1,CCG015386.1,CCG019020.1,CCG009243.1,CCG008422.1,CCG010112.1,CCG009607.1,CCG011006.1,CCG007827.1,CCG014434.1,CCG013643.1,CCG006421.1,CCG023963.3,CCG002038.1,CCG025027.1,CCG016370.1,CCG000148.1,CCG019103.1,CCG019629.2,CCG002917.1,CCG006486.1,CCG005924.2,CCG020909.1,CCG007532.1,CCG007531.1,CCG018447.1,CCG016966.1,CCG018820.3,CCG021110.1,CCG025179.1,CCG021934.1,CCG006777.1,CCG004308.1,CCG025973.1,CCG017995.1,CCG013637.1,CCG023640.1,CCG026314.1,CCG010418.1,CCG025348.1,CCG009080.1,CCG004869.1,CCG019619.1,CCG025396.1,CCG026953.1,CCG006924.1,CCG007417.1,CCG021220.1,CCG001066.1,CCG019866.1,CCG019678.1,CCG008748.1,CCG007724.1,CCG013641.1,CCG015410.1,CCG016027.1,CCG015289.1,CCG025107.1,CCG003495.1,CCG021411.1,CCG009142.1,CCG001859.1,CCG026336.1,CCG005886.1,CCG025131.2,CCG016542.1,CCG015654.1,CCG026154.1,CCG002852.1,CCG010864.1,CCG021152.1, |
|------------|--------------------------------------------------|------------------------|---------------------------|---|--------------------------------------------------------------------------------------------------------------------------------------------------------------------------------------------------------------------------------------------------------------------------------------------------------------------------------------------------------------------------------------------------------------------------------------------------------------------------------------------------------------------------------------------------------------------------------------------------------------------------------------------------------------------------------------------------------------------------------------------------------------------------------------------------------------------------------------------------------------------------------------------------------------------------------------------------------------------------------------------------|

|            |                                               |                        |                           |   |                                                                                                                                                                                                                                                                                                                                                                                                                                                                                                                                                                                                                                                                                                                                                                                                                                                                                                                                                                                                  |
|------------|-----------------------------------------------|------------------------|---------------------------|---|--------------------------------------------------------------------------------------------------------------------------------------------------------------------------------------------------------------------------------------------------------------------------------------------------------------------------------------------------------------------------------------------------------------------------------------------------------------------------------------------------------------------------------------------------------------------------------------------------------------------------------------------------------------------------------------------------------------------------------------------------------------------------------------------------------------------------------------------------------------------------------------------------------------------------------------------------------------------------------------------------|
| GO:0009199 | ribonucleoside triphosphate metabolic process | 82 of 4104 in the list | 147 of 8404 in the genome | 1 | CCG006420.1,CCG017420.1,CCG002549.1,CCG017693.1,CCG007060.1,CCG013000.1,CCG004309.1,CCG006529.1,CCG025989.2,CCG024327.1,CCG015386.1,CCG019020.1,CCG009243.1,CCG008422.1,CCG010112.1,CCG009607.1,CCG011006.1,CCG007827.1,CCG014434.1,CCG013643.1,CCG006421.1,CCG023963.3,CCG002038.1,CCG025027.1,CCG016370.1,CCG000148.1,CCG019103.1,CCG019629.2,CCG002917.1,CCG006486.1,CCG005924.2,CCG020909.1,CCG007532.1,CCG007531.1,CCG018447.1,CCG016966.1,CCG018820.3,CCG021110.1,CCG025179.1,CCG021934.1,CCG006777.1,CCG004308.1,CCG025973.1,CCG017995.1,CCG013637.1,CCG023640.1,CCG026314.1,CCG010418.1,CCG025348.1,CCG009080.1,CCG004869.1,CCG019619.1,CCG025396.1,CCG026953.1,CCG006924.1,CCG007417.1,CCG021220.1,CCG001066.1,CCG019866.1,CCG019678.1,CCG008748.1,CCG007724.1,CCG013641.1,CCG015410.1,CCG016027.1,CCG015289.1,CCG025107.1,CCG003495.1,CCG021411.1,CCG009142.1,CCG001859.1,CCG026336.1,CCG005886.1,CCG025131.2,CCG016542.1,CCG015654.1,CCG026154.1,CCG002852.1,CCG010864.1,CCG021152.1, |
|------------|-----------------------------------------------|------------------------|---------------------------|---|--------------------------------------------------------------------------------------------------------------------------------------------------------------------------------------------------------------------------------------------------------------------------------------------------------------------------------------------------------------------------------------------------------------------------------------------------------------------------------------------------------------------------------------------------------------------------------------------------------------------------------------------------------------------------------------------------------------------------------------------------------------------------------------------------------------------------------------------------------------------------------------------------------------------------------------------------------------------------------------------------|

|            |                                                      |                        |                           |   |                                                                                                                                                                                                                                                                                                                                                                                                                                                                                                                                                                                                                                                                                                                                                                                                                                                                                                                                                                                                  |
|------------|------------------------------------------------------|------------------------|---------------------------|---|--------------------------------------------------------------------------------------------------------------------------------------------------------------------------------------------------------------------------------------------------------------------------------------------------------------------------------------------------------------------------------------------------------------------------------------------------------------------------------------------------------------------------------------------------------------------------------------------------------------------------------------------------------------------------------------------------------------------------------------------------------------------------------------------------------------------------------------------------------------------------------------------------------------------------------------------------------------------------------------------------|
| GO:0009205 | purine ribonucleoside triphosphate metabolic process | 82 of 4104 in the list | 147 of 8404 in the genome | 1 | CCG006420.1,CCG017420.1,CCG002549.1,CCG017693.1,CCG007060.1,CCG013000.1,CCG004309.1,CCG006529.1,CCG025989.2,CCG024327.1,CCG015386.1,CCG019020.1,CCG009243.1,CCG008422.1,CCG010112.1,CCG009607.1,CCG011006.1,CCG007827.1,CCG014434.1,CCG013643.1,CCG006421.1,CCG023963.3,CCG002038.1,CCG025027.1,CCG016370.1,CCG000148.1,CCG019103.1,CCG019629.2,CCG002917.1,CCG006486.1,CCG005924.2,CCG020909.1,CCG007532.1,CCG007531.1,CCG018447.1,CCG016966.1,CCG018820.3,CCG021110.1,CCG025179.1,CCG021934.1,CCG006777.1,CCG004308.1,CCG025973.1,CCG017995.1,CCG013637.1,CCG023640.1,CCG026314.1,CCG010418.1,CCG025348.1,CCG009080.1,CCG004869.1,CCG019619.1,CCG025396.1,CCG026953.1,CCG006924.1,CCG007417.1,CCG021220.1,CCG001066.1,CCG019866.1,CCG019678.1,CCG008748.1,CCG007724.1,CCG013641.1,CCG015410.1,CCG016027.1,CCG015289.1,CCG025107.1,CCG003495.1,CCG021411.1,CCG009142.1,CCG001859.1,CCG026336.1,CCG005886.1,CCG025131.2,CCG016542.1,CCG015654.1,CCG026154.1,CCG002852.1,CCG010864.1,CCG021152.1, |
|------------|------------------------------------------------------|------------------------|---------------------------|---|--------------------------------------------------------------------------------------------------------------------------------------------------------------------------------------------------------------------------------------------------------------------------------------------------------------------------------------------------------------------------------------------------------------------------------------------------------------------------------------------------------------------------------------------------------------------------------------------------------------------------------------------------------------------------------------------------------------------------------------------------------------------------------------------------------------------------------------------------------------------------------------------------------------------------------------------------------------------------------------------------|

|            |                                |                         |                           |   |                                                                                                                                                                                                                                                                                                                                                                                                                                                                                                                                                                                                                                                                                                                                                                                                                                                                                                                                                                                                                                                                                                                                                                                                                                                                                                                                                                                                                                                                                                  |
|------------|--------------------------------|-------------------------|---------------------------|---|--------------------------------------------------------------------------------------------------------------------------------------------------------------------------------------------------------------------------------------------------------------------------------------------------------------------------------------------------------------------------------------------------------------------------------------------------------------------------------------------------------------------------------------------------------------------------------------------------------------------------------------------------------------------------------------------------------------------------------------------------------------------------------------------------------------------------------------------------------------------------------------------------------------------------------------------------------------------------------------------------------------------------------------------------------------------------------------------------------------------------------------------------------------------------------------------------------------------------------------------------------------------------------------------------------------------------------------------------------------------------------------------------------------------------------------------------------------------------------------------------|
| GO:0005975 | carbohydrate metabolic process | 175 of 4104 in the list | 328 of 8404 in the genome | 1 | CCG018536.1,CCG022363.1,CCG004122.1,CCG007885.1,CCG007046.2,CCG015677.1,CCG009776.1,CCG001501.1,CCG018730.1,CCG018613.1,CCG023324.1,CCG020504.1,CCG003220.2,CCG022974.1,CCG006203.1,CCG004091.1,CCG004020.1,CCG001355.1,CCG009685.1,CCG000970.1,CCG022453.1,CCG003748.1,CCG009494.1,CCG012558.1,CCG025472.1,CCG025412.1,CCG001038.1,CCG018432.1,CCG010996.1,CCG013485.1,CCG015610.1,CCG025307.1,CCG023374.1,CCG019693.1,CCG016653.1,CCG007771.1,CCG008317.1,CCG023890.1,CCG019874.1,CCG003001.1,CCG019210.1,CCG015235.1,CCG010652.1,CCG010019.1,CCG025277.1,CCG017651.1,CCG003215.3,CCG028548.1,CCG025362.1,CCG002418.1,CCG009596.1,CCG013169.3,CCG025948.4,CCG006042.2,CCG006010.1,CCG002600.1,CCG020739.1,CCG023172.1,CCG008484.1,CCG027416.1,CCG006671.1,CCG025962.1,CCG026284.1,CCG007772.1,CCG027708.4,CCG004165.1,CCG015038.1,CCG002307.1,CCG008663.1,CCG010818.1,CCG013318.1,CCG010414.1,CCG017197.1,CCG013985.1,CCG022214.1,CCG011451.2,CCG012840.1,CCG006213.1,CCG017278.1,CCG024829.1,CCG018423.1,CCG028116.1,CCG017200.1,CCG023757.1,CCG023420.1,CCG006221.1,CCG005177.1,CCG007200.2,CCG028454.1,CCG011996.1,CCG003277.1,CCG025015.2,CCG002599.1,CCG002702.1,CCG015170.1,CCG017381.1,CCG005588.1,CCG023617.1,CCG011547.1,CCG010373.1,CCG008437.1,CCG028547.1,CCG007766.1,CCG001602.1,CCG020802.1,CCG009803.1,CCG027015.1,CCG008287.1,CCG006358.1,CCG020803.1,CCG018480.1,CCG012048.1,CCG019825.2,CCG001590.1,CCG022035.1,CCG013172.1,CCG007045.1,CCG020511.1,CCG023748.1,CCG028524.1, |
|------------|--------------------------------|-------------------------|---------------------------|---|--------------------------------------------------------------------------------------------------------------------------------------------------------------------------------------------------------------------------------------------------------------------------------------------------------------------------------------------------------------------------------------------------------------------------------------------------------------------------------------------------------------------------------------------------------------------------------------------------------------------------------------------------------------------------------------------------------------------------------------------------------------------------------------------------------------------------------------------------------------------------------------------------------------------------------------------------------------------------------------------------------------------------------------------------------------------------------------------------------------------------------------------------------------------------------------------------------------------------------------------------------------------------------------------------------------------------------------------------------------------------------------------------------------------------------------------------------------------------------------------------|

|            |                                                   |                        |                          |   |                                                                                                                                                                                                                                                                                                                                                  |
|------------|---------------------------------------------------|------------------------|--------------------------|---|--------------------------------------------------------------------------------------------------------------------------------------------------------------------------------------------------------------------------------------------------------------------------------------------------------------------------------------------------|
| GO:0009118 | regulation of nucleoside metabolic process        | 30 of 4104 in the list | 49 of 8404 in the genome | 1 | CCG016454.1,CCG021442.1,CCG022083.1,CCG025433.1,CCG022394.1,CCG016027.1,CCG011341.1,CCG019462.1,CCG012519.1,CCG004132.1,CCG017369.1,CCG024000.1,CCG025554.1,CCG016965.1,CCG022676.1,CCG013303.1,CCG027878.1,CCG024809.1,CCG009024.1,CCG007631.1,CCG015333.1,CCG002971.1,CCG016181.1,CCG013203.1,CCG018776.1,CCG002109.1,CCG021151.1,CCG010260.1, |
| GO:0030811 | regulation of nucleotide catabolic process        | 30 of 4104 in the list | 49 of 8404 in the genome | 1 | CCG016454.1,CCG021442.1,CCG022083.1,CCG025433.1,CCG022394.1,CCG016027.1,CCG011341.1,CCG019462.1,CCG012519.1,CCG004132.1,CCG017369.1,CCG024000.1,CCG025554.1,CCG016965.1,CCG022676.1,CCG013303.1,CCG027878.1,CCG024809.1,CCG009024.1,CCG007631.1,CCG015333.1,CCG002971.1,CCG016181.1,CCG013203.1,CCG018776.1,CCG002109.1,CCG021151.1,CCG010260.1, |
| GO:0033121 | regulation of purine nucleotide catabolic process | 30 of 4104 in the list | 49 of 8404 in the genome | 1 | CCG016454.1,CCG021442.1,CCG022083.1,CCG025433.1,CCG022394.1,CCG016027.1,CCG011341.1,CCG019462.1,CCG012519.1,CCG004132.1,CCG017369.1,CCG024000.1,CCG025554.1,CCG016965.1,CCG022676.1,CCG013303.1,CCG027878.1,CCG024809.1,CCG009024.1,CCG007631.1,CCG015333.1,CCG002971.1,CCG016181.1,CCG013203.1,CCG018776.1,CCG002109.1,CCG021151.1,CCG010260.1, |
| GO:0033124 | regulation of GTP catabolic process               | 30 of 4104 in the list | 49 of 8404 in the genome | 1 | CCG016454.1,CCG021442.1,CCG022083.1,CCG025433.1,CCG022394.1,CCG016027.1,CCG011341.1,CCG019462.1,CCG012519.1,CCG004132.1,CCG017369.1,CCG024000.1,CCG025554.1,CCG016965.1,CCG022676.1,CCG013303.1,CCG027878.1,CCG024809.1,CCG009024.1,CCG007631.1,CCG015333.1,CCG002971.1,CCG016181.1,CCG013203.1,CCG018776.1,CCG002109.1,CCG021151.1,CCG010260.1, |
| GO:0043087 | regulation of GTPase activity                     | 30 of 4104 in the list | 49 of 8404 in the genome | 1 | CCG016454.1,CCG021442.1,CCG022083.1,CCG025433.1,CCG022394.1,CCG016027.1,CCG011341.1,CCG019462.1,CCG012519.1,CCG004132.1,CCG017369.1,CCG024000.1,CCG025554.1,CCG016965.1,CCG022676.1,CCG013303.1,CCG027878.1,CCG024809.1,CCG009024.1,CCG007631.1,CCG015333.1,CCG002971.1,CCG016181.1,CCG013203.1,CCG018776.1,CCG002109.1,CCG021151.1,CCG010260.1, |

|            |                                                     |                        |                          |   |                                                                                                                                                                                                                                                                                                                                                  |
|------------|-----------------------------------------------------|------------------------|--------------------------|---|--------------------------------------------------------------------------------------------------------------------------------------------------------------------------------------------------------------------------------------------------------------------------------------------------------------------------------------------------|
| GO:1900542 | regulation of purine nucleotide metabolic process   | 30 of 4104 in the list | 49 of 8404 in the genome | 1 | CCG016454.1,CCG021442.1,CCG022083.1,CCG025433.1,CCG022394.1,CCG016027.1,CCG011341.1,CCG019462.1,CCG012519.1,CCG004132.1,CCG017369.1,CCG024000.1,CCG025554.1,CCG016965.1,CCG022676.1,CCG013303.1,CCG027878.1,CCG024809.1,CCG009024.1,CCG007631.1,CCG015333.1,CCG002971.1,CCG016181.1,CCG013203.1,CCG018776.1,CCG002109.1,CCG021151.1,CCG010260.1, |
| GO:0006534 | cysteine metabolic process                          | 6 of 4104 in the list  | 7 of 8404 in the genome  | 1 | CCG006994.1,CCG025465.1,CCG018907.1,CCG015568.1,CCG015567.1,CCG025636.2                                                                                                                                                                                                                                                                          |
| GO:0005992 | trehalose biosynthetic process                      | 4 of 4104 in the list  | 4 of 8404 in the genome  | 1 | CCG019693.1,CCG014260.1,CCG024762.1,CCG013129.1                                                                                                                                                                                                                                                                                                  |
| GO:0006023 | aminoglycan biosynthetic process                    | 4 of 4104 in the list  | 4 of 8404 in the genome  | 1 | CCG017559.1,CCG024517.1,CCG022072.1,CCG025840.1                                                                                                                                                                                                                                                                                                  |
| GO:0006024 | glycosaminoglycan biosynthetic process              | 4 of 4104 in the list  | 4 of 8404 in the genome  | 1 | CCG017559.1,CCG024517.1,CCG022072.1,CCG025840.1                                                                                                                                                                                                                                                                                                  |
| GO:0006269 | DNA replication, synthesis of RNA primer            | 4 of 4104 in the list  | 4 of 8404 in the genome  | 1 | CCG015694.1,CCG009896.1,CCG006164.1,CCG016381.1                                                                                                                                                                                                                                                                                                  |
| GO:0006338 | chromatin remodeling                                | 4 of 4104 in the list  | 4 of 8404 in the genome  | 1 | CCG011675.1,CCG001913.1,CCG027348.1,CCG000575.1                                                                                                                                                                                                                                                                                                  |
| GO:0006405 | RNA export from nucleus                             | 4 of 4104 in the list  | 4 of 8404 in the genome  | 1 | CCG011567.1,CCG017874.1,CCG021221.1,CCG026989.1                                                                                                                                                                                                                                                                                                  |
| GO:0006406 | mRNA export from nucleus                            | 4 of 4104 in the list  | 4 of 8404 in the genome  | 1 | CCG011567.1,CCG017874.1,CCG021221.1,CCG026989.1                                                                                                                                                                                                                                                                                                  |
| GO:0006421 | asparaginyl-tRNA aminoacylation                     | 4 of 4104 in the list  | 4 of 8404 in the genome  | 1 | CCG021774.1,CCG015367.1,CCG010565.1,CCG010321.1                                                                                                                                                                                                                                                                                                  |
| GO:0006458 | 'de novo' protein folding                           | 4 of 4104 in the list  | 4 of 8404 in the genome  | 1 | CCG012492.1,CCG007076.1,CCG006921.1,CCG014012.1                                                                                                                                                                                                                                                                                                  |
| GO:0006528 | asparagine metabolic process                        | 4 of 4104 in the list  | 4 of 8404 in the genome  | 1 | CCG006821.1,CCG010174.2,CCG009333.1,CCG024133.1                                                                                                                                                                                                                                                                                                  |
| GO:0006529 | asparagine biosynthetic process                     | 4 of 4104 in the list  | 4 of 8404 in the genome  | 1 | CCG006821.1,CCG010174.2,CCG009333.1,CCG024133.1                                                                                                                                                                                                                                                                                                  |
| GO:0007033 | vacuole organization                                | 4 of 4104 in the list  | 4 of 8404 in the genome  | 1 | CCG019082.1,CCG002366.1,CCG000834.1,CCG013509.1                                                                                                                                                                                                                                                                                                  |
| GO:0007088 | regulation of mitosis                               | 4 of 4104 in the list  | 4 of 8404 in the genome  | 1 | CCG004331.1,CCG002269.1,CCG027068.1,CCG018116.1                                                                                                                                                                                                                                                                                                  |
| GO:0008156 | negative regulation of DNA                          | 4 of 4104 in the list  | 4 of 8404 in the genome  | 1 | CCG018321.1,CCG026841.1,CCG025758.1,CCG014323.1                                                                                                                                                                                                                                                                                                  |
| GO:0009067 | aspartate family amino acid biosynthetic process    | 4 of 4104 in the list  | 4 of 8404 in the genome  | 1 | CCG006821.1,CCG010174.2,CCG009333.1,CCG024133.1                                                                                                                                                                                                                                                                                                  |
| GO:0010498 | proteasomal protein catabolic process               | 4 of 4104 in the list  | 4 of 8404 in the genome  | 1 | CCG005241.1,CCG004331.1,CCG027068.1,CCG001769.1                                                                                                                                                                                                                                                                                                  |
| GO:0010628 | positive regulation of gene                         | 4 of 4104 in the list  | 4 of 8404 in the genome  | 1 | CCG018164.1,CCG026216.1,CCG021944.1,CCG027118.1                                                                                                                                                                                                                                                                                                  |
| GO:0030071 | regulation of mitotic metaphase/anaphase transition | 4 of 4104 in the list  | 4 of 8404 in the genome  | 1 | CCG004331.1,CCG002269.1,CCG027068.1,CCG018116.1                                                                                                                                                                                                                                                                                                  |
| GO:0031120 | snRNA pseudouridine synthesis                       | 4 of 4104 in the list  | 4 of 8404 in the genome  | 1 | CCG002792.1,CCG000540.1,CCG028653.1,CCG016652.1                                                                                                                                                                                                                                                                                                  |
| GO:0040031 | snRNA modification                                  | 4 of 4104 in the list  | 4 of 8404 in the genome  | 1 | CCG002792.1,CCG000540.1,CCG028653.1,CCG016652.1                                                                                                                                                                                                                                                                                                  |



|            |                                                           |                        |                          |   |                                                                                                                                                                                                                                                                                                  |
|------------|-----------------------------------------------------------|------------------------|--------------------------|---|--------------------------------------------------------------------------------------------------------------------------------------------------------------------------------------------------------------------------------------------------------------------------------------------------|
| GO:0043161 | proteasome-mediated ubiquitin-dependent protein catabolic | 4 of 4104 in the list  | 4 of 8404 in the genome  | 1 | CCG005241.1,CCG004331.1,CCG027068.1,CCG001769.1                                                                                                                                                                                                                                                  |
| GO:0045893 | positive regulation of transcription, DNA-templated       | 4 of 4104 in the list  | 4 of 8404 in the genome  | 1 | CCG018164.1,CCG026216.1,CCG021944.1,CCG027118.1                                                                                                                                                                                                                                                  |
| GO:0046351 | disaccharide biosynthetic process                         | 4 of 4104 in the list  | 4 of 8404 in the genome  | 1 | CCG019693.1,CCG014260.1,CCG024762.1,CCG013129.1                                                                                                                                                                                                                                                  |
| GO:0051053 | negative regulation of DNA metabolic process              | 4 of 4104 in the list  | 4 of 8404 in the genome  | 1 | CCG018321.1,CCG026841.1,CCG025758.1,CCG014323.1                                                                                                                                                                                                                                                  |
| GO:0051084 | 'de novo' posttranslational protein folding               | 4 of 4104 in the list  | 4 of 8404 in the genome  | 1 | CCG012492.1,CCG007076.1,CCG006921.1,CCG014012.1                                                                                                                                                                                                                                                  |
| GO:0051085 | chaperone mediated protein folding requiring cofactor     | 4 of 4104 in the list  | 4 of 8404 in the genome  | 1 | CCG012492.1,CCG007076.1,CCG006921.1,CCG014012.1                                                                                                                                                                                                                                                  |
| GO:0051168 | nuclear export                                            | 4 of 4104 in the list  | 4 of 8404 in the genome  | 1 | CCG011567.1,CCG017874.1,CCG021221.1,CCG026989.1                                                                                                                                                                                                                                                  |
| GO:0051302 | regulation of cell division                               | 4 of 4104 in the list  | 4 of 8404 in the genome  | 1 | CCG004331.1,CCG002269.1,CCG027068.1,CCG018116.1                                                                                                                                                                                                                                                  |
| GO:0051783 | regulation of nuclear division                            | 4 of 4104 in the list  | 4 of 8404 in the genome  | 1 | CCG004331.1,CCG002269.1,CCG027068.1,CCG018116.1                                                                                                                                                                                                                                                  |
| GO:0061077 | chaperone-mediated protein                                | 4 of 4104 in the list  | 4 of 8404 in the genome  | 1 | CCG012492.1,CCG007076.1,CCG006921.1,CCG014012.1                                                                                                                                                                                                                                                  |
| GO:1902099 | regulation of metaphase/anaphase transition of            | 4 of 4104 in the list  | 4 of 8404 in the genome  | 1 | CCG004331.1,CCG002269.1,CCG027068.1,CCG018116.1                                                                                                                                                                                                                                                  |
| GO:0007049 | cell cycle                                                | 25 of 4104 in the list | 40 of 8404 in the genome | 1 | CCG023588.1,CCG016924.1,CCG019773.1,CCG010140.1,CCG016878.1,CCG022393.1,CCG008308.1,CCG006063.1,CCG004222.1,CCG026841.1,CCG001795.1,CCG026106.1,CCG003424.1,CCG027505.1,CCG027928.1,CCG018249.1,CCG021047.1,CCG001794.1,CCG015077.1,CCG018321.1,CCG004378.1,CCG000839.1,CCG025057.1,CCG024595.1, |

|            |                                |                         |                           |   |                                                                                                                                                                                                                                                                                                                                                                                                                                                                                                                                                                                                                                                                                                                                                                                                                                                                                                                                                                                                                                                                                                                                                                                                                                                                                                                                                                                                                                                                                                                                                                                                                      |
|------------|--------------------------------|-------------------------|---------------------------|---|----------------------------------------------------------------------------------------------------------------------------------------------------------------------------------------------------------------------------------------------------------------------------------------------------------------------------------------------------------------------------------------------------------------------------------------------------------------------------------------------------------------------------------------------------------------------------------------------------------------------------------------------------------------------------------------------------------------------------------------------------------------------------------------------------------------------------------------------------------------------------------------------------------------------------------------------------------------------------------------------------------------------------------------------------------------------------------------------------------------------------------------------------------------------------------------------------------------------------------------------------------------------------------------------------------------------------------------------------------------------------------------------------------------------------------------------------------------------------------------------------------------------------------------------------------------------------------------------------------------------|
| GO:0006082 | organic acid metabolic process | 141 of 4104 in the list | 262 of 8404 in the genome | 1 | CCG010174.2,CCG019078.1,CCG023277.1,CCG014396.1,<br>CCG010191.3,CCG028623.1,CCG009878.1,CCG015950.3,<br>CCG025108.1,CCG016238.1,CCG006391.1,CCG017097.1,<br>CCG019834.1,CCG016220.1,CCG027607.1,CCG025307.1,<br>CCG018907.1,CCG025521.1,CCG001423.1,CCG022025.2,<br>CCG008860.1,CCG006994.1,CCG011722.1,CCG001553.1,<br>CCG003063.1,CCG013063.1,CCG000414.1,CCG019909.1,<br>CCG020877.1,CCG006231.1,CCG008321.1,CCG009244.1,<br>CCG025465.1,CCG020154.1,CCG005204.1,CCG028131.1,<br>CCG011721.1,CCG008510.1,CCG018290.1,CCG022407.1,<br>CCG016315.1,CCG021610.1,CCG027312.1,CCG017543.1,<br>CCG014436.2,CCG006821.1,CCG023315.1,CCG003865.1,<br>CCG009662.1,CCG025439.1,CCG025636.2,CCG017111.1,<br>CCG019545.1,CCG011789.1,CCG022773.2,CCG019330.1,<br>CCG001876.1,CCG002231.1,CCG026570.1,CCG026155.1,<br>CCG015567.1,CCG008388.1,CCG021774.1,CCG015367.1,<br>CCG010111.1,CCG011491.1,CCG012619.1,CCG009333.1,<br>CCG021923.1,CCG006188.1,CCG023501.1,CCG000591.1,<br>CCG027352.3,CCG011135.1,CCG019112.1,CCG013727.1,<br>CCG028092.1,CCG015568.1,CCG019111.1,CCG020441.1,<br>CCG010561.1,CCG026910.1,CCG010321.1,CCG008776.1,<br>CCG022869.1,CCG000138.1,CCG017344.1,CCG027551.3,<br>CCG000472.1,CCG015577.3,CCG018615.3,CCG025731.1,<br>CCG018108.1,CCG026099.1,CCG001082.1,CCG024133.1,<br>CCG026030.1,CCG003751.1,CCG025897.1,CCG002018.1,<br>CCG007203.1,CCG019954.3,CCG015921.1,CCG001811.1,<br>CCG012408.1,CCG020559.1,CCG017708.1,CCG004949.1,<br>CCG005938.1,CCG009084.2,CCG017894.1,CCG013043.1,<br>CCG018289.1,CCG021716.1,CCG021820.1,CCG006570.1,<br>CCG002662.1,CCG006059.1,CCG000352.1,CCG008932.1, |
|------------|--------------------------------|-------------------------|---------------------------|---|----------------------------------------------------------------------------------------------------------------------------------------------------------------------------------------------------------------------------------------------------------------------------------------------------------------------------------------------------------------------------------------------------------------------------------------------------------------------------------------------------------------------------------------------------------------------------------------------------------------------------------------------------------------------------------------------------------------------------------------------------------------------------------------------------------------------------------------------------------------------------------------------------------------------------------------------------------------------------------------------------------------------------------------------------------------------------------------------------------------------------------------------------------------------------------------------------------------------------------------------------------------------------------------------------------------------------------------------------------------------------------------------------------------------------------------------------------------------------------------------------------------------------------------------------------------------------------------------------------------------|

|            |                                   |                         |                           |   |                                                                                                                                                                                                                                                                                                                                                                                                                                                                                                                                                                                                                                                                                                                                                                                                                                                                                                                                                                                                                                                                                                                                                                                                                                                                                                                                                                                                                                                                                                  |
|------------|-----------------------------------|-------------------------|---------------------------|---|--------------------------------------------------------------------------------------------------------------------------------------------------------------------------------------------------------------------------------------------------------------------------------------------------------------------------------------------------------------------------------------------------------------------------------------------------------------------------------------------------------------------------------------------------------------------------------------------------------------------------------------------------------------------------------------------------------------------------------------------------------------------------------------------------------------------------------------------------------------------------------------------------------------------------------------------------------------------------------------------------------------------------------------------------------------------------------------------------------------------------------------------------------------------------------------------------------------------------------------------------------------------------------------------------------------------------------------------------------------------------------------------------------------------------------------------------------------------------------------------------|
| GO:0019752 | carboxylic acid metabolic process | 141 of 4104 in the list | 262 of 8404 in the genome | 1 | CCG010174.2,CCG019078.1,CCG023277.1,CCG014396.1,CCG010191.3,CCG028623.1,CCG009878.1,CCG015950.3,CCG025108.1,CCG016238.1,CCG006391.1,CCG017097.1,CCG019834.1,CCG016220.1,CCG027607.1,CCG025307.1,CCG018907.1,CCG025521.1,CCG001423.1,CCG022025.2,CCG008860.1,CCG006994.1,CCG011722.1,CCG001553.1,CCG003063.1,CCG013063.1,CCG000414.1,CCG019909.1,CCG020877.1,CCG006231.1,CCG008321.1,CCG009244.1,CCG025465.1,CCG020154.1,CCG005204.1,CCG028131.1,CCG011721.1,CCG008510.1,CCG018290.1,CCG022407.1,CCG016315.1,CCG021610.1,CCG027312.1,CCG017543.1,CCG014436.2,CCG006821.1,CCG023315.1,CCG003865.1,CCG009662.1,CCG025439.1,CCG025636.2,CCG017111.1,CCG019545.1,CCG011789.1,CCG022773.2,CCG019330.1,CCG001876.1,CCG002231.1,CCG026570.1,CCG026155.1,CCG015567.1,CCG008388.1,CCG021774.1,CCG015367.1,CCG010111.1,CCG011491.1,CCG012619.1,CCG009333.1,CCG021923.1,CCG006188.1,CCG023501.1,CCG000591.1,CCG027352.3,CCG011135.1,CCG019112.1,CCG013727.1,CCG028092.1,CCG015568.1,CCG019111.1,CCG020441.1,CCG010561.1,CCG026910.1,CCG010321.1,CCG008776.1,CCG022869.1,CCG000138.1,CCG017344.1,CCG027551.3,CCG000472.1,CCG015577.3,CCG018615.3,CCG025731.1,CCG018108.1,CCG026099.1,CCG001082.1,CCG024133.1,CCG026030.1,CCG003751.1,CCG025897.1,CCG002018.1,CCG007203.1,CCG019954.3,CCG015921.1,CCG001811.1,CCG012408.1,CCG020559.1,CCG017708.1,CCG004949.1,CCG005938.1,CCG009084.2,CCG017894.1,CCG013043.1,CCG018289.1,CCG021716.1,CCG021820.1,CCG006570.1,CCG002662.1,CCG006059.1,CCG000352.1,CCG008932.1, |
|------------|-----------------------------------|-------------------------|---------------------------|---|--------------------------------------------------------------------------------------------------------------------------------------------------------------------------------------------------------------------------------------------------------------------------------------------------------------------------------------------------------------------------------------------------------------------------------------------------------------------------------------------------------------------------------------------------------------------------------------------------------------------------------------------------------------------------------------------------------------------------------------------------------------------------------------------------------------------------------------------------------------------------------------------------------------------------------------------------------------------------------------------------------------------------------------------------------------------------------------------------------------------------------------------------------------------------------------------------------------------------------------------------------------------------------------------------------------------------------------------------------------------------------------------------------------------------------------------------------------------------------------------------|

|            |                                |                         |                           |   |                                                                                                                                                                                                                                                                                                                                                                                                                                                                                                                                                                                                                                                                                                                                                                                                                                                                                                                                                                                                                                                                                                                                                                                                                                                                                                                                                                                                                                                                                                  |
|------------|--------------------------------|-------------------------|---------------------------|---|--------------------------------------------------------------------------------------------------------------------------------------------------------------------------------------------------------------------------------------------------------------------------------------------------------------------------------------------------------------------------------------------------------------------------------------------------------------------------------------------------------------------------------------------------------------------------------------------------------------------------------------------------------------------------------------------------------------------------------------------------------------------------------------------------------------------------------------------------------------------------------------------------------------------------------------------------------------------------------------------------------------------------------------------------------------------------------------------------------------------------------------------------------------------------------------------------------------------------------------------------------------------------------------------------------------------------------------------------------------------------------------------------------------------------------------------------------------------------------------------------|
| GO:0043436 | oxoacid metabolic process      | 141 of 4104 in the list | 262 of 8404 in the genome | 1 | CCG010174.2,CCG019078.1,CCG023277.1,CCG014396.1,CCG010191.3,CCG028623.1,CCG009878.1,CCG015950.3,CCG025108.1,CCG016238.1,CCG006391.1,CCG017097.1,CCG019834.1,CCG016220.1,CCG027607.1,CCG025307.1,CCG018907.1,CCG025521.1,CCG001423.1,CCG022025.2,CCG008860.1,CCG006994.1,CCG011722.1,CCG001553.1,CCG003063.1,CCG013063.1,CCG000414.1,CCG019909.1,CCG020877.1,CCG006231.1,CCG008321.1,CCG009244.1,CCG025465.1,CCG020154.1,CCG005204.1,CCG028131.1,CCG011721.1,CCG008510.1,CCG018290.1,CCG022407.1,CCG016315.1,CCG021610.1,CCG027312.1,CCG017543.1,CCG014436.2,CCG006821.1,CCG023315.1,CCG003865.1,CCG009662.1,CCG025439.1,CCG025636.2,CCG017111.1,CCG019545.1,CCG011789.1,CCG022773.2,CCG019330.1,CCG001876.1,CCG002231.1,CCG026570.1,CCG026155.1,CCG015567.1,CCG008388.1,CCG021774.1,CCG015367.1,CCG010111.1,CCG011491.1,CCG012619.1,CCG009333.1,CCG021923.1,CCG006188.1,CCG023501.1,CCG000591.1,CCG027352.3,CCG011135.1,CCG019112.1,CCG013727.1,CCG028092.1,CCG015568.1,CCG019111.1,CCG020441.1,CCG010561.1,CCG026910.1,CCG010321.1,CCG008776.1,CCG022869.1,CCG000138.1,CCG017344.1,CCG027551.3,CCG000472.1,CCG015577.3,CCG018615.3,CCG025731.1,CCG018108.1,CCG026099.1,CCG001082.1,CCG024133.1,CCG026030.1,CCG003751.1,CCG025897.1,CCG002018.1,CCG007203.1,CCG019954.3,CCG015921.1,CCG001811.1,CCG012408.1,CCG020559.1,CCG017708.1,CCG004949.1,CCG005938.1,CCG009084.2,CCG017894.1,CCG013043.1,CCG018289.1,CCG021716.1,CCG021820.1,CCG006570.1,CCG002662.1,CCG006059.1,CCG000352.1,CCG008932.1, |
| GO:0016054 | organic acid catabolic process | 20 of 4104 in the list  | 31 of 8404 in the genome  | 1 | CCG007203.1,CCG019243.1,CCG010111.1,CCG025521.1,CCG020154.1,CCG000591.1,CCG025108.1,CCG011789.1,CCG001082.1,CCG011721.1,CCG006391.1,CCG002231.1,CCG008510.1,CCG011722.1,CCG019834.1,CCG018851.1,CCG003063.1,CCG006059.1,CCG017543.1,CCG008388.1                                                                                                                                                                                                                                                                                                                                                                                                                                                                                                                                                                                                                                                                                                                                                                                                                                                                                                                                                                                                                                                                                                                                                                                                                                                  |

|            |                                                  |                        |                           |   |                                                                                                                                                                                                                                                                                                                                                                                                                                                                                                                                                                                                                                                                                                                                                                                                                                                 |
|------------|--------------------------------------------------|------------------------|---------------------------|---|-------------------------------------------------------------------------------------------------------------------------------------------------------------------------------------------------------------------------------------------------------------------------------------------------------------------------------------------------------------------------------------------------------------------------------------------------------------------------------------------------------------------------------------------------------------------------------------------------------------------------------------------------------------------------------------------------------------------------------------------------------------------------------------------------------------------------------------------------|
| GO:0046395 | carboxylic acid catabolic process                | 20 of 4104 in the list | 31 of 8404 in the genome  | 1 | CCG007203.1,CCG019243.1,CCG010111.1,CCG025521.1,CCG020154.1,CCG000591.1,CCG025108.1,CCG011789.1,CCG001082.1,CCG011721.1,CCG006391.1,CCG002231.1,CCG008510.1,CCG011722.1,CCG019834.1,CCG018851.1,CCG003063.1,CCG006059.1,CCG017543.1,CCG008388.1                                                                                                                                                                                                                                                                                                                                                                                                                                                                                                                                                                                                 |
| GO:0006220 | pyrimidine nucleotide metabolic process          | 12 of 4104 in the list | 17 of 8404 in the genome  | 1 | CCG025493.1,CCG013610.1,CCG016614.1,CCG004180.1,CCG017995.1,CCG007417.1,CCG021110.1,CCG010960.2,CCG006529.1,CCG016222.1,CCG023452.1,CCG014116.1                                                                                                                                                                                                                                                                                                                                                                                                                                                                                                                                                                                                                                                                                                 |
| GO:0009084 | glutamine family amino acid biosynthetic process | 12 of 4104 in the list | 17 of 8404 in the genome  | 1 | CCG017111.1,CCG025731.1,CCG007203.1,CCG022773.2,CCG017894.1,CCG002231.1,CCG016220.1,CCG015921.1,CCG001423.1,CCG025897.1,CCG003871.1,CCG008860.1                                                                                                                                                                                                                                                                                                                                                                                                                                                                                                                                                                                                                                                                                                 |
| GO:0009063 | cellular amino acid catabolic process            | 16 of 4104 in the list | 24 of 8404 in the genome  | 1 | CCG011789.1,CCG007203.1,CCG025108.1,CCG019243.1,CCG001082.1,CCG011721.1,CCG002231.1,CCG008510.1,CCG011722.1,CCG010111.1,CCG019834.1,CCG003063.1,CCG020154.1,CCG006059.1,CCG008388.1,CCG017543.1                                                                                                                                                                                                                                                                                                                                                                                                                                                                                                                                                                                                                                                 |
| GO:0006323 | DNA packaging                                    | 69 of 4104 in the list | 123 of 8404 in the genome | 1 | CCG003361.1,CCG019284.1,CCG008560.1,CCG010136.1,CCG021491.1,CCG010647.1,CCG003310.1,CCG013617.1,CCG000433.1,CCG026473.1,CCG012476.1,CCG014537.1,CCG010137.1,CCG009461.1,CCG005194.1,CCG024623.1,CCG025880.1,CCG014836.1,CCG010904.1,CCG024177.1,CCG004481.1,CCG012514.1,CCG027196.1,CCG014772.1,CCG026474.1,CCG025893.1,CCG009637.1,CCG010905.1,CCG026579.1,CCG010909.1,CCG010648.1,CCG017580.1,CCG009980.1,CCG010906.1,CCG015968.1,CCG018893.1,CCG010138.1,CCG010649.1,CCG008892.2,CCG025877.1,CCG015560.1,CCG027199.1,CCG027198.1,CCG018287.1,CCG008559.1,CCG027696.1,CCG010907.1,CCG012229.1,CCG010650.1,CCG000708.1,CCG025990.1,CCG024624.1,CCG009275.1,CCG004494.1,CCG002947.1,CCG010908.1,CCG005716.1,CCG027197.1,CCG022673.1,CCG027697.1,CCG026159.1,CCG020442.1,CCG010646.1,CCG017598.1,CCG024787.1,CCG027695.1,CCG012584.1,CCG008302.1 |

|            |                     |                        |                           |   |                                                                                                                                                                                                                                                                                                                                                                                                                                                                                                                                                                                                                                                                                                                                                                                                                                                 |
|------------|---------------------|------------------------|---------------------------|---|-------------------------------------------------------------------------------------------------------------------------------------------------------------------------------------------------------------------------------------------------------------------------------------------------------------------------------------------------------------------------------------------------------------------------------------------------------------------------------------------------------------------------------------------------------------------------------------------------------------------------------------------------------------------------------------------------------------------------------------------------------------------------------------------------------------------------------------------------|
| GO:0006334 | nucleosome assembly | 69 of 4104 in the list | 123 of 8404 in the genome | 1 | CCG003361.1,CCG019284.1,CCG008560.1,CCG010136.1,CCG021491.1,CCG010647.1,CCG003310.1,CCG013617.1,CCG000433.1,CCG026473.1,CCG012476.1,CCG014537.1,CCG010137.1,CCG009461.1,CCG005194.1,CCG024623.1,CCG025880.1,CCG014836.1,CCG010904.1,CCG024177.1,CCG004481.1,CCG012514.1,CCG027196.1,CCG014772.1,CCG026474.1,CCG025893.1,CCG009637.1,CCG010905.1,CCG026579.1,CCG010909.1,CCG010648.1,CCG017580.1,CCG009980.1,CCG010906.1,CCG015968.1,CCG018893.1,CCG010138.1,CCG010649.1,CCG008892.2,CCG025877.1,CCG015560.1,CCG027199.1,CCG027198.1,CCG018287.1,CCG008559.1,CCG027696.1,CCG010907.1,CCG012229.1,CCG010650.1,CCG000708.1,CCG025990.1,CCG024624.1,CCG009275.1,CCG004494.1,CCG002947.1,CCG010908.1,CCG005716.1,CCG027197.1,CCG022673.1,CCG027697.1,CCG026159.1,CCG020442.1,CCG010646.1,CCG017598.1,CCG024787.1,CCG027695.1,CCG012584.1,CCG008302.1 |
| GO:0031497 | chromatin assembly  | 69 of 4104 in the list | 123 of 8404 in the genome | 1 | CCG003361.1,CCG019284.1,CCG008560.1,CCG010136.1,CCG021491.1,CCG010647.1,CCG003310.1,CCG013617.1,CCG000433.1,CCG026473.1,CCG012476.1,CCG014537.1,CCG010137.1,CCG009461.1,CCG005194.1,CCG024623.1,CCG025880.1,CCG014836.1,CCG010904.1,CCG024177.1,CCG004481.1,CCG012514.1,CCG027196.1,CCG014772.1,CCG026474.1,CCG025893.1,CCG009637.1,CCG010905.1,CCG026579.1,CCG010909.1,CCG010648.1,CCG017580.1,CCG009980.1,CCG010906.1,CCG015968.1,CCG018893.1,CCG010138.1,CCG010649.1,CCG008892.2,CCG025877.1,CCG015560.1,CCG027199.1,CCG027198.1,CCG018287.1,CCG008559.1,CCG027696.1,CCG010907.1,CCG012229.1,CCG010650.1,CCG000708.1,CCG025990.1,CCG024624.1,CCG009275.1,CCG004494.1,CCG002947.1,CCG010908.1,CCG005716.1,CCG027197.1,CCG022673.1,CCG027697.1,CCG026159.1,CCG020442.1,CCG010646.1,CCG017598.1,CCG024787.1,CCG027695.1,CCG012584.1,CCG008302.1 |

|            |                              |                        |                           |   |                                                                                                                                                                                                                                                                                                                                                                                                                                                                                                                                                                                                                                                                                                                                                                                                                                                 |
|------------|------------------------------|------------------------|---------------------------|---|-------------------------------------------------------------------------------------------------------------------------------------------------------------------------------------------------------------------------------------------------------------------------------------------------------------------------------------------------------------------------------------------------------------------------------------------------------------------------------------------------------------------------------------------------------------------------------------------------------------------------------------------------------------------------------------------------------------------------------------------------------------------------------------------------------------------------------------------------|
| GO:0034728 | nucleosome organization      | 69 of 4104 in the list | 123 of 8404 in the genome | 1 | CCG003361.1,CCG019284.1,CCG008560.1,CCG010136.1,CCG021491.1,CCG010647.1,CCG003310.1,CCG013617.1,CCG000433.1,CCG026473.1,CCG012476.1,CCG014537.1,CCG010137.1,CCG009461.1,CCG005194.1,CCG024623.1,CCG025880.1,CCG014836.1,CCG010904.1,CCG024177.1,CCG004481.1,CCG012514.1,CCG027196.1,CCG014772.1,CCG026474.1,CCG025893.1,CCG009637.1,CCG010905.1,CCG026579.1,CCG010909.1,CCG010648.1,CCG017580.1,CCG009980.1,CCG010906.1,CCG015968.1,CCG018893.1,CCG010138.1,CCG010649.1,CCG008892.2,CCG025877.1,CCG015560.1,CCG027199.1,CCG027198.1,CCG018287.1,CCG008559.1,CCG027696.1,CCG010907.1,CCG012229.1,CCG010650.1,CCG000708.1,CCG025990.1,CCG024624.1,CCG009275.1,CCG004494.1,CCG002947.1,CCG010908.1,CCG005716.1,CCG027197.1,CCG022673.1,CCG027697.1,CCG026159.1,CCG020442.1,CCG010646.1,CCG017598.1,CCG024787.1,CCG027695.1,CCG012584.1,CCG008302.1 |
| GO:0065004 | protein-DNA complex assembly | 69 of 4104 in the list | 123 of 8404 in the genome | 1 | CCG003361.1,CCG019284.1,CCG008560.1,CCG010136.1,CCG021491.1,CCG010647.1,CCG003310.1,CCG013617.1,CCG000433.1,CCG026473.1,CCG012476.1,CCG014537.1,CCG010137.1,CCG009461.1,CCG005194.1,CCG024623.1,CCG025880.1,CCG014836.1,CCG010904.1,CCG024177.1,CCG004481.1,CCG012514.1,CCG027196.1,CCG014772.1,CCG026474.1,CCG025893.1,CCG009637.1,CCG010905.1,CCG026579.1,CCG010909.1,CCG010648.1,CCG017580.1,CCG009980.1,CCG010906.1,CCG015968.1,CCG018893.1,CCG010138.1,CCG010649.1,CCG008892.2,CCG025877.1,CCG015560.1,CCG027199.1,CCG027198.1,CCG018287.1,CCG008559.1,CCG027696.1,CCG010907.1,CCG012229.1,CCG010650.1,CCG000708.1,CCG025990.1,CCG024624.1,CCG009275.1,CCG004494.1,CCG002947.1,CCG010908.1,CCG005716.1,CCG027197.1,CCG022673.1,CCG027697.1,CCG026159.1,CCG020442.1,CCG010646.1,CCG017598.1,CCG024787.1,CCG027695.1,CCG012584.1,CCG008302.1 |

|            |                                           |                        |                           |   |                                                                                                                                                                                                                                                                                                                                                                                                                                                                                                                                                                                                                                                                                                                                                                                                                                                                                                                                                                                                  |
|------------|-------------------------------------------|------------------------|---------------------------|---|--------------------------------------------------------------------------------------------------------------------------------------------------------------------------------------------------------------------------------------------------------------------------------------------------------------------------------------------------------------------------------------------------------------------------------------------------------------------------------------------------------------------------------------------------------------------------------------------------------------------------------------------------------------------------------------------------------------------------------------------------------------------------------------------------------------------------------------------------------------------------------------------------------------------------------------------------------------------------------------------------|
| GO:0071824 | protein-DNA complex subunit organization  | 69 of 4104 in the list | 123 of 8404 in the genome | 1 | CCG003361.1,CCG019284.1,CCG008560.1,CCG010136.1,CCG021491.1,CCG010647.1,CCG003310.1,CCG013617.1,CCG000433.1,CCG026473.1,CCG012476.1,CCG014537.1,CCG010137.1,CCG009461.1,CCG005194.1,CCG024623.1,CCG025880.1,CCG014836.1,CCG010904.1,CCG024177.1,CCG004481.1,CCG012514.1,CCG027196.1,CCG014772.1,CCG026474.1,CCG025893.1,CCG009637.1,CCG010905.1,CCG026579.1,CCG010909.1,CCG010648.1,CCG017580.1,CCG009980.1,CCG010906.1,CCG015968.1,CCG018893.1,CCG010138.1,CCG010649.1,CCG008892.2,CCG025877.1,CCG015560.1,CCG027199.1,CCG027198.1,CCG018287.1,CCG008559.1,CCG027696.1,CCG010907.1,CCG012229.1,CCG010650.1,CCG000708.1,CCG025990.1,CCG024624.1,CCG009275.1,CCG004494.1,CCG002947.1,CCG010908.1,CCG005716.1,CCG027197.1,CCG022673.1,CCG027697.1,CCG026159.1,CCG020442.1,CCG010646.1,CCG017598.1,CCG024787.1,CCG027695.1,CCG012584.1,CCG008302.1                                                                                                                                                  |
| GO:1901361 | organic cyclic compound catabolic process | 82 of 4104 in the list | 148 of 8404 in the genome | 1 | CCG006420.1,CCG017420.1,CCG002549.1,CCG007060.1,CCG005524.1,CCG013000.1,CCG013766.1,CCG024327.1,CCG015386.1,CCG019020.1,CCG009243.1,CCG020685.1,CCG002925.1,CCG023005.1,CCG024375.1,CCG009607.1,CCG011006.1,CCG027119.1,CCG004448.2,CCG007827.1,CCG014434.1,CCG006421.1,CCG023963.3,CCG021990.1,CCG025027.1,CCG016370.1,CCG019103.1,CCG019629.2,CCG006311.1,CCG002917.1,CCG005147.1,CCG004988.1,CCG020909.1,CCG007532.1,CCG007531.1,CCG018447.1,CCG016966.1,CCG018820.3,CCG019674.1,CCG011722.1,CCG025179.1,CCG006777.1,CCG007203.1,CCG025973.1,CCG013637.1,CCG009424.1,CCG001440.1,CCG010418.1,CCG018917.1,CCG009080.1,CCG004869.1,CCG007690.1,CCG025396.1,CCG026953.1,CCG011721.1,CCG006924.1,CCG021220.1,CCG008748.1,CCG006059.1,CCG013641.1,CCG016027.1,CCG015289.1,CCG003495.1,CCG021411.1,CCG001859.1,CCG026336.1,CCG005886.1,CCG009582.1,CCG025131.2,CCG016542.1,CCG026154.1,CCG015654.1,CCG002852.1,CCG010864.1,CCG011789.1,CCG001445.1,CCG013765.1,CCG002231.1,CCG007362.1,CCG021152.1, |



|            |                                       |                        |                           |   |                                                                                                                                                                                                                                                                                                                                                                                                                                                                                                                                                                                                                                                                                                                                                                                                                                                 |
|------------|---------------------------------------|------------------------|---------------------------|---|-------------------------------------------------------------------------------------------------------------------------------------------------------------------------------------------------------------------------------------------------------------------------------------------------------------------------------------------------------------------------------------------------------------------------------------------------------------------------------------------------------------------------------------------------------------------------------------------------------------------------------------------------------------------------------------------------------------------------------------------------------------------------------------------------------------------------------------------------|
| GO:0006457 | protein folding                       | 70 of 4104 in the list | 125 of 8404 in the genome | 1 | CCG021998.1,CCG003491.1,CCG019684.1,CCG023237.1,CCG013640.1,CCG025006.1,CCG021889.1,CCG025005.1,CCG009881.1,CCG000247.1,CCG003605.1,CCG009574.1,CCG012726.1,CCG014012.1,CCG007750.2,CCG011681.1,CCG000413.3,CCG007076.1,CCG015580.1,CCG025714.1,CCG017244.1,CCG012492.1,CCG006264.1,CCG016271.1,CCG020417.1,CCG011874.1,CCG005429.3,CCG026501.1,CCG002446.2,CCG002465.1,CCG005738.1,CCG017448.1,CCG011095.1,CCG005024.1,CCG025028.1,CCG005069.1,CCG028346.1,CCG015268.1,CCG020060.1,CCG023148.1,CCG026694.1,CCG015511.1,CCG015074.1,CCG006921.1,CCG017706.1,CCG002982.1,CCG000546.1,CCG002534.1,CCG022020.1,CCG012166.1,CCG009266.1,CCG011939.1,CCG025031.1,CCG022993.1,CCG023764.1,CCG024791.1,CCG008539.2,CCG024897.1,CCG005780.1,CCG022509.1,CCG027565.1,CCG027653.1,CCG003657.2,CCG007108.1,CCG000444.1,CCG026112.1,CCG003480.1,CCG026959.1 |
| GO:0009725 | response to hormone                   | 17 of 4104 in the list | 26 of 8404 in the genome  | 1 | CCG024271.1,CCG008742.1,CCG016745.1,CCG008741.1,CCG017795.1,CCG000659.1,CCG014509.1,CCG027127.1,CCG019520.1,CCG019185.1,CCG022281.1,CCG020586.1,CCG012009.1,CCG010702.1,CCG020224.1,CCG004878.1,                                                                                                                                                                                                                                                                                                                                                                                                                                                                                                                                                                                                                                                |
| GO:0009755 | hormone-mediated signaling pathway    | 17 of 4104 in the list | 26 of 8404 in the genome  | 1 | CCG024271.1,CCG008742.1,CCG016745.1,CCG008741.1,CCG017795.1,CCG000659.1,CCG014509.1,CCG027127.1,CCG019520.1,CCG019185.1,CCG022281.1,CCG020586.1,CCG012009.1,CCG010702.1,CCG020224.1,CCG004878.1,                                                                                                                                                                                                                                                                                                                                                                                                                                                                                                                                                                                                                                                |
| GO:0014070 | response to organic cyclic compound   | 17 of 4104 in the list | 26 of 8404 in the genome  | 1 | CCG024271.1,CCG008742.1,CCG016745.1,CCG008741.1,CCG017795.1,CCG000659.1,CCG014509.1,CCG027127.1,CCG019520.1,CCG019185.1,CCG022281.1,CCG020586.1,CCG012009.1,CCG010702.1,CCG020224.1,CCG004878.1,                                                                                                                                                                                                                                                                                                                                                                                                                                                                                                                                                                                                                                                |
| GO:0032870 | cellular response to hormone stimulus | 17 of 4104 in the list | 26 of 8404 in the genome  | 1 | CCG024271.1,CCG008742.1,CCG016745.1,CCG008741.1,CCG017795.1,CCG000659.1,CCG014509.1,CCG027127.1,CCG019520.1,CCG019185.1,CCG022281.1,CCG020586.1,CCG012009.1,CCG010702.1,CCG020224.1,CCG004878.1,                                                                                                                                                                                                                                                                                                                                                                                                                                                                                                                                                                                                                                                |

|            |                                               |                        |                          |   |                                                                                                                                                                                                                                                                                                                                                                                                  |
|------------|-----------------------------------------------|------------------------|--------------------------|---|--------------------------------------------------------------------------------------------------------------------------------------------------------------------------------------------------------------------------------------------------------------------------------------------------------------------------------------------------------------------------------------------------|
| GO:0033993 | response to lipid                             | 17 of 4104 in the list | 26 of 8404 in the genome | 1 | CCG024271.1,CCG008742.1,CCG016745.1,CCG008741.1,CCG017795.1,CCG000659.1,CCG014509.1,CCG027127.1,CCG019520.1,CCG019185.1,CCG022281.1,CCG020586.1,CCG012009.1,CCG010702.1,CCG020224.1,CCG004878.1,                                                                                                                                                                                                 |
| GO:0043401 | steroid hormone mediated signaling pathway    | 17 of 4104 in the list | 26 of 8404 in the genome | 1 | CCG024271.1,CCG008742.1,CCG016745.1,CCG008741.1,CCG017795.1,CCG000659.1,CCG014509.1,CCG027127.1,CCG019520.1,CCG019185.1,CCG022281.1,CCG020586.1,CCG012009.1,CCG010702.1,CCG020224.1,CCG004878.1,                                                                                                                                                                                                 |
| GO:0048545 | response to steroid hormone                   | 17 of 4104 in the list | 26 of 8404 in the genome | 1 | CCG024271.1,CCG008742.1,CCG016745.1,CCG008741.1,CCG017795.1,CCG000659.1,CCG014509.1,CCG027127.1,CCG019520.1,CCG019185.1,CCG022281.1,CCG020586.1,CCG012009.1,CCG010702.1,CCG020224.1,CCG004878.1,                                                                                                                                                                                                 |
| GO:0071383 | cellular response to steroid hormone stimulus | 17 of 4104 in the list | 26 of 8404 in the genome | 1 | CCG024271.1,CCG008742.1,CCG016745.1,CCG008741.1,CCG017795.1,CCG000659.1,CCG014509.1,CCG027127.1,CCG019520.1,CCG019185.1,CCG022281.1,CCG020586.1,CCG012009.1,CCG010702.1,CCG020224.1,CCG004878.1,                                                                                                                                                                                                 |
| GO:0071396 | cellular response to lipid                    | 17 of 4104 in the list | 26 of 8404 in the genome | 1 | CCG024271.1,CCG008742.1,CCG016745.1,CCG008741.1,CCG017795.1,CCG000659.1,CCG014509.1,CCG027127.1,CCG019520.1,CCG019185.1,CCG022281.1,CCG020586.1,CCG012009.1,CCG010702.1,CCG020224.1,CCG004878.1,                                                                                                                                                                                                 |
| GO:0071407 | cellular response to organic cyclic compound  | 17 of 4104 in the list | 26 of 8404 in the genome | 1 | CCG024271.1,CCG008742.1,CCG016745.1,CCG008741.1,CCG017795.1,CCG000659.1,CCG014509.1,CCG027127.1,CCG019520.1,CCG019185.1,CCG022281.1,CCG020586.1,CCG012009.1,CCG010702.1,CCG020224.1,CCG004878.1,                                                                                                                                                                                                 |
| GO:0019318 | hexose metabolic process                      | 35 of 4104 in the list | 59 of 8404 in the genome | 1 | CCG020616.1,CCG005588.1,CCG003215.3,CCG010373.1,CCG007981.1,CCG008437.1,CCG007046.2,CCG008287.1,CCG000431.1,CCG004388.1,CCG009084.2,CCG019953.1,CCG012740.1,CCG003220.2,CCG006203.1,CCG001355.1,CCG022453.1,CCG003748.1,CCG001038.1,CCG010996.1,CCG022035.1,CCG007045.1,CCG025307.1,CCG028524.1,CCG022214.1,CCG007023.1,CCG012840.1,CCG007771.1,CCG017278.1,CCG013339.1,CCG018423.1,CCG017200.1, |

|            |                                  |                        |                           |   |                                                                                                                                                                                                                                                                                                                                                                                                                                                                                                                                                                                                                                                                                                                                                                                                                                                                                                                                                                                                                                                                                                  |
|------------|----------------------------------|------------------------|---------------------------|---|--------------------------------------------------------------------------------------------------------------------------------------------------------------------------------------------------------------------------------------------------------------------------------------------------------------------------------------------------------------------------------------------------------------------------------------------------------------------------------------------------------------------------------------------------------------------------------------------------------------------------------------------------------------------------------------------------------------------------------------------------------------------------------------------------------------------------------------------------------------------------------------------------------------------------------------------------------------------------------------------------------------------------------------------------------------------------------------------------|
| GO:0009119 | ribonucleoside metabolic process | 93 of 4104 in the list | 170 of 8404 in the genome | 1 | CCG006420.1,CCG017420.1,CCG002549.1,CCG017693.1,CCG007060.1,CCG013000.1,CCG004309.1,CCG006529.1,CCG025989.2,CCG024327.1,CCG015386.1,CCG019020.1,CCG009243.1,CCG008422.1,CCG010112.1,CCG009607.1,CCG011006.1,CCG007827.1,CCG014434.1,CCG013643.1,CCG006421.1,CCG023963.3,CCG002038.1,CCG025027.1,CCG016370.1,CCG000148.1,CCG019103.1,CCG019629.2,CCG002917.1,CCG006486.1,CCG005924.2,CCG020909.1,CCG007532.1,CCG007531.1,CCG018447.1,CCG016966.1,CCG018820.3,CCG021110.1,CCG025179.1,CCG021934.1,CCG006777.1,CCG004308.1,CCG025973.1,CCG017995.1,CCG013637.1,CCG023640.1,CCG026314.1,CCG010418.1,CCG025348.1,CCG009080.1,CCG004869.1,CCG019619.1,CCG025396.1,CCG013999.1,CCG026953.1,CCG021336.1,CCG006924.1,CCG007417.1,CCG021220.1,CCG001066.1,CCG019866.1,CCG004440.1,CCG019678.1,CCG007724.1,CCG008748.1,CCG010460.1,CCG013641.1,CCG015410.1,CCG016027.1,CCG015289.1,CCG025107.1,CCG003495.1,CCG021411.1,CCG009142.1,CCG001859.1,CCG026812.1,CCG026336.1,CCG005886.1,CCG025131.2,CCG016542.1,CCG026154.1,CCG015654.1,CCG018659.2,CCG002852.1,CCG010864.1,CCG013610.1,CCG016614.1,CCG006791.1, |
|------------|----------------------------------|------------------------|---------------------------|---|--------------------------------------------------------------------------------------------------------------------------------------------------------------------------------------------------------------------------------------------------------------------------------------------------------------------------------------------------------------------------------------------------------------------------------------------------------------------------------------------------------------------------------------------------------------------------------------------------------------------------------------------------------------------------------------------------------------------------------------------------------------------------------------------------------------------------------------------------------------------------------------------------------------------------------------------------------------------------------------------------------------------------------------------------------------------------------------------------|

|            |                                               |                         |                           |   |                                                                                                                                                                                                                                                                                                                                                                                                                                                                                                                                                                                                                                                                                                                                                                                                                                                                                                                                                                                                                                                                                                                                                                                                                                                                                                                                                                                                                                                                                                  |
|------------|-----------------------------------------------|-------------------------|---------------------------|---|--------------------------------------------------------------------------------------------------------------------------------------------------------------------------------------------------------------------------------------------------------------------------------------------------------------------------------------------------------------------------------------------------------------------------------------------------------------------------------------------------------------------------------------------------------------------------------------------------------------------------------------------------------------------------------------------------------------------------------------------------------------------------------------------------------------------------------------------------------------------------------------------------------------------------------------------------------------------------------------------------------------------------------------------------------------------------------------------------------------------------------------------------------------------------------------------------------------------------------------------------------------------------------------------------------------------------------------------------------------------------------------------------------------------------------------------------------------------------------------------------|
| GO:0010468 | regulation of gene expression                 | 262 of 4104 in the list | 503 of 8404 in the genome | 1 | CCG022266.1,CCG008767.3,CCG008741.1,CCG003390.1,CCG027427.1,CCG007493.1,CCG021465.1,CCG003175.1,CCG023752.1,CCG028326.3,CCG013794.1,CCG006134.1,CCG009970.1,CCG016745.1,CCG021436.1,CCG016445.1,CCG012536.1,CCG000659.1,CCG027127.1,CCG018719.1,CCG015425.1,CCG027796.1,CCG022824.1,CCG018533.1,CCG024710.1,CCG022281.1,CCG011465.1,CCG006714.1,CCG020129.1,CCG027186.1,CCG000588.1,CCG022045.1,CCG013274.1,CCG028568.1,CCG007647.1,CCG021633.1,CCG012083.1,CCG000562.1,CCG005480.2,CCG017760.1,CCG005486.1,CCG016859.1,CCG020898.1,CCG017591.1,CCG002198.1,CCG021284.1,CCG016924.1,CCG000133.1,CCG013224.2,CCG002273.1,CCG001698.1,CCG023777.1,CCG014461.1,CCG026228.2,CCG005487.1,CCG021054.1,CCG016307.1,CCG009805.2,CCG016749.1,CCG028465.1,CCG019250.1,CCG005396.1,CCG025747.1,CCG009823.1,CCG021456.1,CCG014928.1,CCG005168.1,CCG018184.1,CCG018315.1,CCG027580.1,CCG024271.1,CCG009458.1,CCG022496.1,CCG015062.1,CCG018164.1,CCG001301.1,CCG023199.2,CCG001431.2,CCG001341.1,CCG022398.1,CCG021521.1,CCG009562.2,CCG010139.1,CCG021940.1,CCG024639.1,CCG015846.1,CCG008833.1,CCG018168.1,CCG014509.1,CCG004783.1,CCG025691.1,CCG018042.1,CCG014463.1,CCG026788.1,CCG020543.1,CCG025549.1,CCG011015.1,CCG027950.1,CCG025572.1,CCG002045.1,CCG004378.1,CCG014243.1,CCG009023.1,CCG018847.1,CCG027258.1,CCG008371.1,CCG022947.1,CCG008742.1,CCG011228.1,CCG004762.2,CCG028421.1,CCG003427.1,CCG005635.1,CCG020695.1,CCG000593.1,CCG004151.1,CCG014982.1,CCG000436.1,CCG002199.1,CCG019279.1, |
| GO:0017148 | negative regulation of translation            | 10 of 4104 in the list  | 14 of 8404 in the genome  | 1 | CCG003216.1,CCG003765.1,CCG016445.1,CCG005486.1,CCG006714.1,CCG015062.1,CCG005487.1,CCG005485.1,CCG023431.1,CCG016835.2                                                                                                                                                                                                                                                                                                                                                                                                                                                                                                                                                                                                                                                                                                                                                                                                                                                                                                                                                                                                                                                                                                                                                                                                                                                                                                                                                                          |
| GO:0009070 | serine family amino acid biosynthetic process | 7 of 4104 in the list   | 9 of 8404 in the genome   | 1 | CCG015568.1,CCG028131.1,CCG019954.3,CCG022025.2,CCG015567.1,CCG025636.2,CCG017201.1                                                                                                                                                                                                                                                                                                                                                                                                                                                                                                                                                                                                                                                                                                                                                                                                                                                                                                                                                                                                                                                                                                                                                                                                                                                                                                                                                                                                              |

|            |                                               |                        |                           |   |                                                                                                                                                                                                                                                                                                                                                                                                                                                                                                                                                                                                                                                                                                                                                                                                                                                                                                                                                 |
|------------|-----------------------------------------------|------------------------|---------------------------|---|-------------------------------------------------------------------------------------------------------------------------------------------------------------------------------------------------------------------------------------------------------------------------------------------------------------------------------------------------------------------------------------------------------------------------------------------------------------------------------------------------------------------------------------------------------------------------------------------------------------------------------------------------------------------------------------------------------------------------------------------------------------------------------------------------------------------------------------------------------------------------------------------------------------------------------------------------|
| GO:1901617 | organic hydroxy compound biosynthetic process | 7 of 4104 in the list  | 9 of 8404 in the genome   | 1 | CCG024095.1,CCG014174.1,CCG026536.1,CCG020559.1,CCG023757.1,CCG016653.1,CCG026331.1                                                                                                                                                                                                                                                                                                                                                                                                                                                                                                                                                                                                                                                                                                                                                                                                                                                             |
| GO:0007156 | homophilic cell adhesion                      | 20 of 4104 in the list | 32 of 8404 in the genome  | 1 | CCG026424.3,CCG022123.1,CCG017729.1,CCG007182.1,CCG016263.1,CCG028158.1,CCG001422.1,CCG000237.1,CCG021360.1,CCG007356.1,CCG000127.1,CCG012634.1,CCG020013.1,CCG007575.1,CCG004542.1,CCG016446.1,CCG027757.1,CCG007117.1,CCG013255.1,CCG013707.1                                                                                                                                                                                                                                                                                                                                                                                                                                                                                                                                                                                                                                                                                                 |
| GO:0016337 | cell-cell adhesion                            | 20 of 4104 in the list | 32 of 8404 in the genome  | 1 | CCG026424.3,CCG022123.1,CCG017729.1,CCG007182.1,CCG016263.1,CCG028158.1,CCG001422.1,CCG000237.1,CCG021360.1,CCG007356.1,CCG000127.1,CCG012634.1,CCG020013.1,CCG007575.1,CCG004542.1,CCG016446.1,CCG027757.1,CCG007117.1,CCG013255.1,CCG013707.1                                                                                                                                                                                                                                                                                                                                                                                                                                                                                                                                                                                                                                                                                                 |
| GO:0019439 | aromatic compound catabolic process           | 80 of 4104 in the list | 146 of 8404 in the genome | 1 | CCG006420.1,CCG017420.1,CCG002549.1,CCG007060.1,CCG005524.1,CCG013000.1,CCG013766.1,CCG024327.1,CCG015386.1,CCG019020.1,CCG009243.1,CCG020685.1,CCG002925.1,CCG023005.1,CCG024375.1,CCG009607.1,CCG011006.1,CCG027119.1,CCG004448.2,CCG007827.1,CCG014434.1,CCG006421.1,CCG023963.3,CCG021990.1,CCG025027.1,CCG016370.1,CCG019103.1,CCG019629.2,CCG006311.1,CCG002917.1,CCG005147.1,CCG004988.1,CCG020909.1,CCG007532.1,CCG007531.1,CCG018447.1,CCG016966.1,CCG018820.3,CCG019674.1,CCG011722.1,CCG025179.1,CCG006777.1,CCG025973.1,CCG013637.1,CCG009424.1,CCG001440.1,CCG010418.1,CCG018917.1,CCG009080.1,CCG004869.1,CCG007690.1,CCG025396.1,CCG026953.1,CCG011721.1,CCG006924.1,CCG021220.1,CCG008748.1,CCG006059.1,CCG013641.1,CCG016027.1,CCG015289.1,CCG003495.1,CCG021411.1,CCG001859.1,CCG026336.1,CCG005886.1,CCG009582.1,CCG025131.2,CCG016542.1,CCG026154.1,CCG015654.1,CCG002852.1,CCG010864.1,CCG011789.1,CCG001445.1,CCG013765.1 |
| GO:1901606 | alpha-amino acid catabolic process            | 15 of 4104 in the list | 23 of 8404 in the genome  | 1 | CCG011789.1,CCG007203.1,CCG025108.1,CCG001082.1,CCG011721.1,CCG002231.1,CCG008510.1,CCG011722.1,CCG010111.1,CCG019834.1,CCG003063.1,CCG020154.1,CCG006059.1,CCG008388.1,CCG017543.1                                                                                                                                                                                                                                                                                                                                                                                                                                                                                                                                                                                                                                                                                                                                                             |

|            |                                                                             |                        |                          |   |                                                                                                                                                                                                                                                                                                                                                                                                                                                                                                                                     |
|------------|-----------------------------------------------------------------------------|------------------------|--------------------------|---|-------------------------------------------------------------------------------------------------------------------------------------------------------------------------------------------------------------------------------------------------------------------------------------------------------------------------------------------------------------------------------------------------------------------------------------------------------------------------------------------------------------------------------------|
| GO:0008277 | regulation of G-protein coupled receptor protein signaling pathway          | 11 of 4104 in the list | 16 of 8404 in the genome | 1 | CCG012573.1,CCG026798.1,CCG024952.1,CCG023484.1,CCG011501.1,CCG019427.1,CCG009446.1,CCG006412.1,CCG017498.1,CCG004343.1,CCG015459.1                                                                                                                                                                                                                                                                                                                                                                                                 |
| GO:0023021 | termination of signal transduction                                          | 11 of 4104 in the list | 16 of 8404 in the genome | 1 | CCG012573.1,CCG026798.1,CCG024952.1,CCG023484.1,CCG011501.1,CCG019427.1,CCG009446.1,CCG006412.1,CCG017498.1,CCG004343.1,CCG015459.1                                                                                                                                                                                                                                                                                                                                                                                                 |
| GO:0032269 | negative regulation of cellular protein metabolic process                   | 11 of 4104 in the list | 16 of 8404 in the genome | 1 | CCG003216.1,CCG003765.1,CCG016445.1,CCG005486.1,CCG006714.1,CCG015062.1,CCG005487.1,CCG005485.1,CCG023431.1,CCG016835.2,CCG021794.1                                                                                                                                                                                                                                                                                                                                                                                                 |
| GO:0038032 | termination of G-protein coupled receptor signaling pathway                 | 11 of 4104 in the list | 16 of 8404 in the genome | 1 | CCG012573.1,CCG026798.1,CCG024952.1,CCG023484.1,CCG011501.1,CCG019427.1,CCG009446.1,CCG006412.1,CCG017498.1,CCG004343.1,CCG015459.1                                                                                                                                                                                                                                                                                                                                                                                                 |
| GO:0045744 | negative regulation of G-protein coupled receptor protein signaling pathway | 11 of 4104 in the list | 16 of 8404 in the genome | 1 | CCG012573.1,CCG026798.1,CCG024952.1,CCG023484.1,CCG011501.1,CCG019427.1,CCG009446.1,CCG006412.1,CCG017498.1,CCG004343.1,CCG015459.1                                                                                                                                                                                                                                                                                                                                                                                                 |
| GO:0051248 | negative regulation of protein metabolic process                            | 11 of 4104 in the list | 16 of 8404 in the genome | 1 | CCG003216.1,CCG003765.1,CCG016445.1,CCG005486.1,CCG006714.1,CCG015062.1,CCG005487.1,CCG005485.1,CCG023431.1,CCG016835.2,CCG021794.1                                                                                                                                                                                                                                                                                                                                                                                                 |
| GO:0005996 | monosaccharide metabolic process                                            | 35 of 4104 in the list | 60 of 8404 in the genome | 1 | CCG020616.1,CCG005588.1,CCG003215.3,CCG010373.1,CCG007981.1,CCG008437.1,CCG007046.2,CCG008287.1,CCG000431.1,CCG004388.1,CCG009084.2,CCG019953.1,CCG012740.1,CCG003220.2,CCG006203.1,CCG001355.1,CCG022453.1,CCG003748.1,CCG001038.1,CCG010996.1,CCG022035.1,CCG007045.1,CCG025307.1,CCG028524.1,CCG022214.1,CCG007023.1,CCG012840.1,CCG007771.1,CCG017278.1,CCG013339.1,CCG018423.1,CCG017200.1,CCG012573.1,CCG026798.1,CCG024952.1,CCG023484.1,CCG011501.1,CCG019427.1,CCG009446.1,CCG006412.1,CCG017498.1,CCG004343.1,CCG015459.1 |
| GO:0032313 | regulation of Rab GTPase activity                                           | 22 of 4104 in the list | 36 of 8404 in the genome | 1 | CCG025433.1,CCG016027.1,CCG011341.1,CCG012519.1,CCG017369.1,CCG024000.1,CCG016965.1,CCG022676.1,CCG013303.1,CCG027878.1,CCG024809.1,CCG009024.1,CCG007631.1,CCG015333.1,CCG002971.1,CCG016181.1,CCG013203.1,CCG018776.1,CCG002109.1,CCG021151.1,CCG012573.1,CCG026798.1,CCG024952.1,CCG023484.1,CCG011501.1,CCG019427.1,CCG009446.1,CCG006412.1,CCG017498.1,CCG004343.1,CCG015459.1                                                                                                                                                 |

|            |                                               |                        |                           |   |                                                                                                                                                                                                                                                                                                                                                                                                                                                                                                                                                                                                                                                                                                                                                                                                                                                                                                                                                  |
|------------|-----------------------------------------------|------------------------|---------------------------|---|--------------------------------------------------------------------------------------------------------------------------------------------------------------------------------------------------------------------------------------------------------------------------------------------------------------------------------------------------------------------------------------------------------------------------------------------------------------------------------------------------------------------------------------------------------------------------------------------------------------------------------------------------------------------------------------------------------------------------------------------------------------------------------------------------------------------------------------------------------------------------------------------------------------------------------------------------|
| GO:0032483 | regulation of Rab protein signal transduction | 22 of 4104 in the list | 36 of 8404 in the genome  | 1 | CCG025433.1,CCG016027.1,CCG011341.1,CCG012519.1,CCG017369.1,CCG024000.1,CCG016965.1,CCG022676.1,CCG013303.1,CCG027878.1,CCG024809.1,CCG009024.1,CCG007631.1,CCG015333.1,CCG002971.1,CCG016181.1,CCG013203.1,CCG018776.1,CCG002109.1,CCG021151.1,                                                                                                                                                                                                                                                                                                                                                                                                                                                                                                                                                                                                                                                                                                 |
| GO:0046700 | heterocycle catabolic process                 | 79 of 4104 in the list | 145 of 8404 in the genome | 1 | CCG006420.1,CCG017420.1,CCG002549.1,CCG007060.1,CCG005524.1,CCG013000.1,CCG013766.1,CCG024327.1,CCG015386.1,CCG019020.1,CCG009243.1,CCG020685.1,CCG002925.1,CCG023005.1,CCG024375.1,CCG009607.1,CCG011006.1,CCG027119.1,CCG004448.2,CCG007827.1,CCG014434.1,CCG006421.1,CCG023963.3,CCG021990.1,CCG025027.1,CCG016370.1,CCG019103.1,CCG019629.2,CCG006311.1,CCG002917.1,CCG005147.1,CCG004988.1,CCG020909.1,CCG007532.1,CCG007531.1,CCG018447.1,CCG016966.1,CCG018820.3,CCG019674.1,CCG025179.1,CCG006777.1,CCG007203.1,CCG025973.1,CCG013637.1,CCG009424.1,CCG001440.1,CCG010418.1,CCG018917.1,CCG009080.1,CCG004869.1,CCG007690.1,CCG025396.1,CCG026953.1,CCG006924.1,CCG021220.1,CCG008748.1,CCG006059.1,CCG013641.1,CCG016027.1,CCG015289.1,CCG003495.1,CCG021411.1,CCG001859.1,CCG026336.1,CCG005886.1,CCG009582.1,CCG025131.2,CCG016542.1,CCG026154.1,CCG015654.1,CCG002852.1,CCG010864.1,CCG001445.1,CCG013765.1,CCG002231.1,CCG007362.1, |
| GO:0006020 | inositol metabolic process                    | 5 of 4104 in the list  | 6 of 8404 in the genome   | 1 | CCG014174.1,CCG006358.1,CCG023757.1,CCG016653.1,CCG005177.1                                                                                                                                                                                                                                                                                                                                                                                                                                                                                                                                                                                                                                                                                                                                                                                                                                                                                      |
| GO:0006072 | glycerol-3-phosphate metabolic process        | 5 of 4104 in the list  | 6 of 8404 in the genome   | 1 | CCG009685.1,CCG000970.1,CCG025146.1,CCG012558.1,CCG014228.2                                                                                                                                                                                                                                                                                                                                                                                                                                                                                                                                                                                                                                                                                                                                                                                                                                                                                      |
| GO:0006606 | protein import into nucleus                   | 5 of 4104 in the list  | 6 of 8404 in the genome   | 1 | CCG022771.1,CCG017077.1,CCG017078.1,CCG001809.1,CCG011696.1                                                                                                                                                                                                                                                                                                                                                                                                                                                                                                                                                                                                                                                                                                                                                                                                                                                                                      |
| GO:0034504 | protein localization to nucleus               | 5 of 4104 in the list  | 6 of 8404 in the genome   | 1 | CCG022771.1,CCG017077.1,CCG017078.1,CCG001809.1,CCG011696.1                                                                                                                                                                                                                                                                                                                                                                                                                                                                                                                                                                                                                                                                                                                                                                                                                                                                                      |
| GO:0044744 | protein targeting to nucleus                  | 5 of 4104 in the list  | 6 of 8404 in the genome   | 1 | CCG022771.1,CCG017077.1,CCG017078.1,CCG001809.1,CCG011696.1                                                                                                                                                                                                                                                                                                                                                                                                                                                                                                                                                                                                                                                                                                                                                                                                                                                                                      |
| GO:0051170 | nuclear import                                | 5 of 4104 in the list  | 6 of 8404 in the genome   | 1 | CCG022771.1,CCG017077.1,CCG017078.1,CCG001809.1,CCG011696.1                                                                                                                                                                                                                                                                                                                                                                                                                                                                                                                                                                                                                                                                                                                                                                                                                                                                                      |

|            |                                           |                         |                           |   |                                                                                                                                                                                                                                                                                                                                                                                                                                                                                                                                                                                                                                                                                                                                                                                                                                                                                                                                                                                                                                                                                                                                                                                                                                                                                                                                                                                                                                                                                                  |
|------------|-------------------------------------------|-------------------------|---------------------------|---|--------------------------------------------------------------------------------------------------------------------------------------------------------------------------------------------------------------------------------------------------------------------------------------------------------------------------------------------------------------------------------------------------------------------------------------------------------------------------------------------------------------------------------------------------------------------------------------------------------------------------------------------------------------------------------------------------------------------------------------------------------------------------------------------------------------------------------------------------------------------------------------------------------------------------------------------------------------------------------------------------------------------------------------------------------------------------------------------------------------------------------------------------------------------------------------------------------------------------------------------------------------------------------------------------------------------------------------------------------------------------------------------------------------------------------------------------------------------------------------------------|
| GO:1902593 | single-organism nuclear import            | 5 of 4104 in the list   | 6 of 8404 in the genome   | 1 | CCG022771.1,CCG017077.1,CCG017078.1,CCG001809.1,CCG011696.1                                                                                                                                                                                                                                                                                                                                                                                                                                                                                                                                                                                                                                                                                                                                                                                                                                                                                                                                                                                                                                                                                                                                                                                                                                                                                                                                                                                                                                      |
| GO:1901135 | carbohydrate derivative metabolic process | 236 of 4104 in the list | 455 of 8404 in the genome | 1 | CCG010077.1,CCG006420.1,CCG017420.1,CCG002549.1,CCG018536.1,CCG013000.1,CCG006912.1,CCG017331.1,CCG000663.1,CCG005809.1,CCG025989.2,CCG024327.1,CCG015386.1,CCG019020.1,CCG020504.1,CCG024517.1,CCG007330.1,CCG004091.1,CCG004020.1,CCG009685.1,CCG000970.1,CCG009607.1,CCG009494.1,CCG011531.1,CCG011006.1,CCG011695.1,CCG012558.1,CCG025472.1,CCG007816.1,CCG005029.1,CCG018432.1,CCG015610.1,CCG020799.1,CCG009434.1,CCG016370.1,CCG006911.1,CCG002917.1,CCG022378.1,CCG006486.1,CCG025940.1,CCG023890.1,CCG019371.1,CCG028332.1,CCG014180.1,CCG019210.1,CCG021110.1,CCG003601.1,CCG010019.1,CCG010960.2,CCG024612.1,CCG017559.1,CCG011972.1,CCG016153.1,CCG023640.1,CCG010728.1,CCG002418.1,CCG013131.1,CCG025948.4,CCG025348.1,CCG019619.1,CCG004869.1,CCG009080.1,CCG012725.1,CCG025396.1,CCG023924.1,CCG026953.1,CCG006924.1,CCG021220.1,CCG009165.1,CCG025962.1,CCG014181.1,CCG019678.1,CCG003677.1,CCG021610.1,CCG010460.1,CCG013641.1,CCG025233.1,CCG015410.1,CCG011257.1,CCG015289.1,CCG009142.1,CCG021411.1,CCG003495.1,CCG026898.1,CCG001859.1,CCG015029.1,CCG017197.1,CCG013985.1,CCG026044.1,CCG025131.2,CCG000552.1,CCG024829.1,CCG015804.1,CCG014116.1,CCG002852.1,CCG013610.1,CCG010986.1,CCG018643.1,CCG023420.1,CCG014228.2,CCG006221.1,CCG010727.1,CCG006791.1,CCG028454.1,CCG021152.1,CCG020663.1,CCG023526.2,CCG011996.1,CCG001285.1,CCG017381.1,CCG017693.1,CCG007060.1,CCG023617.1,CCG017175.1,CCG004309.1,CCG006529.1,CCG017730.1,CCG007766.1,CCG021005.1,CCG001602.1, |



|            |                                   |                         |                           |   |                                                                                                                                                                                                                                                                                                                                                                                                                                                                                                                                                                                                                                                                                                                                                                                                                                                                                                                                                                                                                                                                                                                                                                                                                                                                                                                                                                                                                                                                                                  |
|------------|-----------------------------------|-------------------------|---------------------------|---|--------------------------------------------------------------------------------------------------------------------------------------------------------------------------------------------------------------------------------------------------------------------------------------------------------------------------------------------------------------------------------------------------------------------------------------------------------------------------------------------------------------------------------------------------------------------------------------------------------------------------------------------------------------------------------------------------------------------------------------------------------------------------------------------------------------------------------------------------------------------------------------------------------------------------------------------------------------------------------------------------------------------------------------------------------------------------------------------------------------------------------------------------------------------------------------------------------------------------------------------------------------------------------------------------------------------------------------------------------------------------------------------------------------------------------------------------------------------------------------------------|
| GO:0019637 | organophosphate metabolic process | 180 of 4104 in the list | 344 of 8404 in the genome | 1 | CCG006420.1,CCG017420.1,CCG002549.1,CCG019820.1,CCG013000.1,CCG000663.1,CCG013766.1,CCG025989.2,CCG024327.1,CCG024092.1,CCG015386.1,CCG019020.1,CCG012875.1,CCG025493.1,CCG026174.1,CCG000016.1,CCG007330.1,CCG009685.1,CCG000970.1,CCG002925.1,CCG023005.1,CCG024375.1,CCG003748.1,CCG009607.1,CCG011531.1,CCG011006.1,CCG027119.1,CCG012558.1,CCG025307.1,CCG009434.1,CCG007993.1,CCG016370.1,CCG012308.1,CCG006311.1,CCG016653.1,CCG002917.1,CCG006486.1,CCG028332.1,CCG010944.1,CCG006965.1,CCG021110.1,CCG010960.2,CCG016148.1,CCG024612.1,CCG015746.1,CCG023393.1,CCG023640.1,CCG013131.1,CCG025348.1,CCG004191.1,CCG019619.1,CCG004869.1,CCG009080.1,CCG022352.1,CCG025396.1,CCG028131.1,CCG026953.1,CCG006924.1,CCG021220.1,CCG024432.2,CCG019678.1,CCG021610.1,CCG013641.1,CCG025233.1,CCG015410.1,CCG015289.1,CCG009142.1,CCG021411.1,CCG003495.1,CCG026898.1,CCG001859.1,CCG025131.2,CCG000552.1,CCG023452.1,CCG014116.1,CCG002852.1,CCG024903.1,CCG013610.1,CCG023757.1,CCG009518.1,CCG014228.2,CCG006791.1,CCG007362.1,CCG021152.1,CCG023526.2,CCG026865.1,CCG019697.2,CCG001285.1,CCG004532.1,CCG000789.1,CCG017693.1,CCG007060.1,CCG026047.1,CCG006529.1,CCG004309.1,CCG008287.1,CCG004806.1,CCG007533.1,CCG008422.1,CCG009243.1,CCG010112.1,CCG015130.1,CCG007827.1,CCG024155.1,CCG023963.3,CCG006421.1,CCG013643.1,CCG014434.1,CCG021990.1,CCG022209.1,CCG002038.1,CCG024778.1,CCG025027.1,CCG014839.1,CCG000148.1,CCG019103.1,CCG013365.1,CCG019629.2,CCG025889.1,CCG011658.1, |
|------------|-----------------------------------|-------------------------|---------------------------|---|--------------------------------------------------------------------------------------------------------------------------------------------------------------------------------------------------------------------------------------------------------------------------------------------------------------------------------------------------------------------------------------------------------------------------------------------------------------------------------------------------------------------------------------------------------------------------------------------------------------------------------------------------------------------------------------------------------------------------------------------------------------------------------------------------------------------------------------------------------------------------------------------------------------------------------------------------------------------------------------------------------------------------------------------------------------------------------------------------------------------------------------------------------------------------------------------------------------------------------------------------------------------------------------------------------------------------------------------------------------------------------------------------------------------------------------------------------------------------------------------------|

|            |                                     |                        |                           |   |                                                                                                                                                                                                                                                                                                                                                                                                                                                                                                                                                                                                                                                                                                                                                                                                                                                                                                                                                                                                                                                  |
|------------|-------------------------------------|------------------------|---------------------------|---|--------------------------------------------------------------------------------------------------------------------------------------------------------------------------------------------------------------------------------------------------------------------------------------------------------------------------------------------------------------------------------------------------------------------------------------------------------------------------------------------------------------------------------------------------------------------------------------------------------------------------------------------------------------------------------------------------------------------------------------------------------------------------------------------------------------------------------------------------------------------------------------------------------------------------------------------------------------------------------------------------------------------------------------------------|
| GO:0042278 | purine nucleoside metabolic process | 88 of 4104 in the list | 163 of 8404 in the genome | 1 | CCG006420.1,CCG017420.1,CCG002549.1,CCG017693.1,CCG007060.1,CCG013000.1,CCG004309.1,CCG006529.1,CCG025989.2,CCG024327.1,CCG015386.1,CCG019020.1,CCG009243.1,CCG008422.1,CCG010112.1,CCG009607.1,CCG011006.1,CCG007827.1,CCG014434.1,CCG013643.1,CCG006421.1,CCG023963.3,CCG002038.1,CCG025027.1,CCG016370.1,CCG000148.1,CCG019103.1,CCG019629.2,CCG002917.1,CCG006486.1,CCG005924.2,CCG020909.1,CCG007532.1,CCG007531.1,CCG018447.1,CCG016966.1,CCG018820.3,CCG021110.1,CCG025179.1,CCG021934.1,CCG006777.1,CCG004308.1,CCG025973.1,CCG017995.1,CCG013637.1,CCG023640.1,CCG026314.1,CCG010418.1,CCG025348.1,CCG009080.1,CCG004869.1,CCG019619.1,CCG025396.1,CCG013999.1,CCG026953.1,CCG021336.1,CCG006924.1,CCG007417.1,CCG021220.1,CCG001066.1,CCG019866.1,CCG019678.1,CCG007724.1,CCG008748.1,CCG013641.1,CCG015410.1,CCG016027.1,CCG015289.1,CCG025107.1,CCG003495.1,CCG021411.1,CCG009142.1,CCG001859.1,CCG026812.1,CCG026336.1,CCG005886.1,CCG025131.2,CCG016542.1,CCG026154.1,CCG015654.1,CCG018659.2,CCG002852.1,CCG010864.1,CCG006791.1, |
|------------|-------------------------------------|------------------------|---------------------------|---|--------------------------------------------------------------------------------------------------------------------------------------------------------------------------------------------------------------------------------------------------------------------------------------------------------------------------------------------------------------------------------------------------------------------------------------------------------------------------------------------------------------------------------------------------------------------------------------------------------------------------------------------------------------------------------------------------------------------------------------------------------------------------------------------------------------------------------------------------------------------------------------------------------------------------------------------------------------------------------------------------------------------------------------------------|

|            |                                         |                        |                           |   |                                                                                                                                                                                                                                                                                                                                                                                                                                                                                                                                                                                                                                                                                                                                                                                                                                                                                                                                                                                                                                                  |
|------------|-----------------------------------------|------------------------|---------------------------|---|--------------------------------------------------------------------------------------------------------------------------------------------------------------------------------------------------------------------------------------------------------------------------------------------------------------------------------------------------------------------------------------------------------------------------------------------------------------------------------------------------------------------------------------------------------------------------------------------------------------------------------------------------------------------------------------------------------------------------------------------------------------------------------------------------------------------------------------------------------------------------------------------------------------------------------------------------------------------------------------------------------------------------------------------------|
| GO:0046128 | purine ribonucleoside metabolic process | 88 of 4104 in the list | 163 of 8404 in the genome | 1 | CCG006420.1,CCG017420.1,CCG002549.1,CCG017693.1,CCG007060.1,CCG013000.1,CCG004309.1,CCG006529.1,CCG025989.2,CCG024327.1,CCG015386.1,CCG019020.1,CCG009243.1,CCG008422.1,CCG010112.1,CCG009607.1,CCG011006.1,CCG007827.1,CCG014434.1,CCG013643.1,CCG006421.1,CCG023963.3,CCG002038.1,CCG025027.1,CCG016370.1,CCG000148.1,CCG019103.1,CCG019629.2,CCG002917.1,CCG006486.1,CCG005924.2,CCG020909.1,CCG007532.1,CCG007531.1,CCG018447.1,CCG016966.1,CCG018820.3,CCG021110.1,CCG025179.1,CCG021934.1,CCG006777.1,CCG004308.1,CCG025973.1,CCG017995.1,CCG013637.1,CCG023640.1,CCG026314.1,CCG010418.1,CCG025348.1,CCG009080.1,CCG004869.1,CCG019619.1,CCG025396.1,CCG013999.1,CCG026953.1,CCG021336.1,CCG006924.1,CCG007417.1,CCG021220.1,CCG001066.1,CCG019866.1,CCG019678.1,CCG007724.1,CCG008748.1,CCG013641.1,CCG015410.1,CCG016027.1,CCG015289.1,CCG025107.1,CCG003495.1,CCG021411.1,CCG009142.1,CCG001859.1,CCG026812.1,CCG026336.1,CCG005886.1,CCG025131.2,CCG016542.1,CCG026154.1,CCG015654.1,CCG018659.2,CCG002852.1,CCG010864.1,CCG006791.1, |
| GO:0015711 | organic anion transport                 | 18 of 4104 in the list | 29 of 8404 in the genome  | 1 | CCG024382.1,CCG004637.1,CCG006348.1,CCG016959.1,CCG026667.1,CCG024222.1,CCG027758.1,CCG026707.1,CCG024383.1,CCG005768.1,CCG005769.1,CCG018073.1,CCG020840.1,CCG019407.1,CCG008734.1,CCG010965.1,                                                                                                                                                                                                                                                                                                                                                                                                                                                                                                                                                                                                                                                                                                                                                                                                                                                 |
| GO:0015849 | organic acid transport                  | 18 of 4104 in the list | 29 of 8404 in the genome  | 1 | CCG024382.1,CCG004637.1,CCG006348.1,CCG016959.1,CCG026667.1,CCG024222.1,CCG027758.1,CCG026707.1,CCG024383.1,CCG005768.1,CCG005769.1,CCG018073.1,CCG020840.1,CCG019407.1,CCG008734.1,CCG010965.1,                                                                                                                                                                                                                                                                                                                                                                                                                                                                                                                                                                                                                                                                                                                                                                                                                                                 |
| GO:0046942 | carboxylic acid transport               | 18 of 4104 in the list | 29 of 8404 in the genome  | 1 | CCG024382.1,CCG004637.1,CCG006348.1,CCG016959.1,CCG026667.1,CCG024222.1,CCG027758.1,CCG026707.1,CCG024383.1,CCG005768.1,CCG005769.1,CCG018073.1,CCG020840.1,CCG019407.1,CCG008734.1,CCG010965.1,                                                                                                                                                                                                                                                                                                                                                                                                                                                                                                                                                                                                                                                                                                                                                                                                                                                 |

|            |                                  |                         |                            |   |                                                                                                                                                                                                                                                                                                                                                                                                                                                                                                                                                                                                                                                                                                                                                                                                                                                                                                                                                                                                                                                                                                                                                                                                                                                                                                                                                                                                                                                                                                  |
|------------|----------------------------------|-------------------------|----------------------------|---|--------------------------------------------------------------------------------------------------------------------------------------------------------------------------------------------------------------------------------------------------------------------------------------------------------------------------------------------------------------------------------------------------------------------------------------------------------------------------------------------------------------------------------------------------------------------------------------------------------------------------------------------------------------------------------------------------------------------------------------------------------------------------------------------------------------------------------------------------------------------------------------------------------------------------------------------------------------------------------------------------------------------------------------------------------------------------------------------------------------------------------------------------------------------------------------------------------------------------------------------------------------------------------------------------------------------------------------------------------------------------------------------------------------------------------------------------------------------------------------------------|
| GO:0050789 | regulation of biological process | 687 of 4104 in the list | 1363 of 8404 in the genome | 1 | CCG005254.1,CCG017420.1,CCG027068.1,CCG014340.1,CCG005375.1,CCG022266.1,CCG003824.3,CCG008603.1,CCG008767.3,CCG008741.1,CCG003390.1,CCG000646.1,CCG004595.1,CCG007493.1,CCG026174.1,CCG020785.1,CCG010849.1,CCG002338.1,CCG021465.1,CCG020974.1,CCG002841.1,CCG018321.1,CCG013794.1,CCG010275.1,CCG026360.1,CCG021064.1,CCG006134.1,CCG017266.1,CCG016689.2,CCG020709.1,CCG014466.1,CCG015101.1,CCG012536.1,CCG027127.1,CCG015425.1,CCG027796.1,CCG022824.1,CCG018533.1,CCG024710.1,CCG000526.1,CCG022281.1,CCG027669.1,CCG015967.1,CCG021661.1,CCG022420.1,CCG013308.1,CCG023579.1,CCG006714.1,CCG025026.1,CCG010157.1,CCG011911.1,CCG008685.1,CCG004132.1,CCG000588.1,CCG004548.1,CCG022045.1,CCG004279.1,CCG013274.1,CCG024663.1,CCG028568.1,CCG022676.1,CCG007647.1,CCG004331.1,CCG018494.1,CCG024809.1,CCG012083.1,CCG026953.1,CCG017760.1,CCG018380.1,CCG016859.1,CCG005486.1,CCG017498.1,CCG020898.1,CCG017591.1,CCG023464.1,CCG002198.1,CCG021284.1,CCG001579.1,CCG013641.1,CCG016924.1,CCG000732.1,CCG003317.1,CCG000133.1,CCG003495.1,CCG013224.2,CCG002273.1,CCG007951.1,CCG023777.1,CCG026228.2,CCG005487.1,CCG025131.2,CCG009805.2,CCG028465.1,CCG008444.1,CCG017701.1,CCG009823.1,CCG014712.1,CCG000876.1,CCG021456.1,CCG025057.1,CCG024664.1,CCG015638.1,CCG000789.1,CCG024662.1,CCG026047.1,CCG022496.1,CCG024000.1,CCG008939.1,CCG018164.1,CCG019427.1,CCG001431.2,CCG016760.1,CCG014345.2,CCG021521.1,CCG010139.1,CCG006787.1,CCG028500.2,CCG020654.1,CCG015426.1,CCG008833.1, |
|------------|----------------------------------|-------------------------|----------------------------|---|--------------------------------------------------------------------------------------------------------------------------------------------------------------------------------------------------------------------------------------------------------------------------------------------------------------------------------------------------------------------------------------------------------------------------------------------------------------------------------------------------------------------------------------------------------------------------------------------------------------------------------------------------------------------------------------------------------------------------------------------------------------------------------------------------------------------------------------------------------------------------------------------------------------------------------------------------------------------------------------------------------------------------------------------------------------------------------------------------------------------------------------------------------------------------------------------------------------------------------------------------------------------------------------------------------------------------------------------------------------------------------------------------------------------------------------------------------------------------------------------------|

|            |                                |                         |                            |   |                                                                                                                                                                                                                                                                                                                                                                                                                                                                                                                                                                                                                                                                                                                                                                                                                                                                                                                                                                                                                                                                                                                                                                                                                                                                                                                                                                                                                                                                                                  |
|------------|--------------------------------|-------------------------|----------------------------|---|--------------------------------------------------------------------------------------------------------------------------------------------------------------------------------------------------------------------------------------------------------------------------------------------------------------------------------------------------------------------------------------------------------------------------------------------------------------------------------------------------------------------------------------------------------------------------------------------------------------------------------------------------------------------------------------------------------------------------------------------------------------------------------------------------------------------------------------------------------------------------------------------------------------------------------------------------------------------------------------------------------------------------------------------------------------------------------------------------------------------------------------------------------------------------------------------------------------------------------------------------------------------------------------------------------------------------------------------------------------------------------------------------------------------------------------------------------------------------------------------------|
| GO:0050794 | regulation of cellular process | 680 of 4104 in the list | 1349 of 8404 in the genome | 1 | CCG005254.1,CCG017420.1,CCG027068.1,CCG014340.1,CCG005375.1,CCG022266.1,CCG003824.3,CCG008603.1,CCG008767.3,CCG008741.1,CCG003390.1,CCG000646.1,CCG004595.1,CCG007493.1,CCG026174.1,CCG020785.1,CCG010849.1,CCG002338.1,CCG021465.1,CCG020974.1,CCG002841.1,CCG018321.1,CCG013794.1,CCG010275.1,CCG026360.1,CCG021064.1,CCG006134.1,CCG017266.1,CCG016689.2,CCG020709.1,CCG014466.1,CCG015101.1,CCG012536.1,CCG027127.1,CCG015425.1,CCG027796.1,CCG022824.1,CCG018533.1,CCG024710.1,CCG000526.1,CCG022281.1,CCG027669.1,CCG015967.1,CCG021661.1,CCG022420.1,CCG013308.1,CCG023579.1,CCG006714.1,CCG025026.1,CCG010157.1,CCG011911.1,CCG008685.1,CCG004132.1,CCG000588.1,CCG004548.1,CCG022045.1,CCG004279.1,CCG013274.1,CCG024663.1,CCG028568.1,CCG022676.1,CCG007647.1,CCG004331.1,CCG018494.1,CCG024809.1,CCG012083.1,CCG026953.1,CCG017760.1,CCG018380.1,CCG016859.1,CCG005486.1,CCG017498.1,CCG020898.1,CCG017591.1,CCG023464.1,CCG002198.1,CCG021284.1,CCG001579.1,CCG013641.1,CCG016924.1,CCG000732.1,CCG003317.1,CCG000133.1,CCG003495.1,CCG013224.2,CCG002273.1,CCG007951.1,CCG023777.1,CCG026228.2,CCG005487.1,CCG025131.2,CCG009805.2,CCG028465.1,CCG008444.1,CCG017701.1,CCG009823.1,CCG014712.1,CCG000876.1,CCG021456.1,CCG025057.1,CCG024664.1,CCG015638.1,CCG000789.1,CCG024662.1,CCG026047.1,CCG022496.1,CCG024000.1,CCG008939.1,CCG018164.1,CCG019427.1,CCG001431.2,CCG016760.1,CCG014345.2,CCG021521.1,CCG010139.1,CCG006787.1,CCG028500.2,CCG020654.1,CCG015426.1,CCG008833.1, |
|------------|--------------------------------|-------------------------|----------------------------|---|--------------------------------------------------------------------------------------------------------------------------------------------------------------------------------------------------------------------------------------------------------------------------------------------------------------------------------------------------------------------------------------------------------------------------------------------------------------------------------------------------------------------------------------------------------------------------------------------------------------------------------------------------------------------------------------------------------------------------------------------------------------------------------------------------------------------------------------------------------------------------------------------------------------------------------------------------------------------------------------------------------------------------------------------------------------------------------------------------------------------------------------------------------------------------------------------------------------------------------------------------------------------------------------------------------------------------------------------------------------------------------------------------------------------------------------------------------------------------------------------------|

|            |                                  |                        |                           |   |                                                                                                                                                                                                                                                                                                                                                                                                                                                                                                                                                                                                                                                                                                                                                                                                                                                                                                                                                                                                                                                                                                  |
|------------|----------------------------------|------------------------|---------------------------|---|--------------------------------------------------------------------------------------------------------------------------------------------------------------------------------------------------------------------------------------------------------------------------------------------------------------------------------------------------------------------------------------------------------------------------------------------------------------------------------------------------------------------------------------------------------------------------------------------------------------------------------------------------------------------------------------------------------------------------------------------------------------------------------------------------------------------------------------------------------------------------------------------------------------------------------------------------------------------------------------------------------------------------------------------------------------------------------------------------|
| GO:0009259 | ribonucleotide metabolic process | 93 of 4104 in the list | 173 of 8404 in the genome | 1 | CCG006420.1,CCG017420.1,CCG002549.1,CCG017693.1,CCG007060.1,CCG013000.1,CCG004309.1,CCG006529.1,CCG025989.2,CCG024327.1,CCG015386.1,CCG019020.1,CCG009243.1,CCG008422.1,CCG010112.1,CCG009607.1,CCG011006.1,CCG007827.1,CCG014434.1,CCG013643.1,CCG006421.1,CCG023963.3,CCG002038.1,CCG025027.1,CCG016370.1,CCG000148.1,CCG019103.1,CCG013365.1,CCG019629.2,CCG002917.1,CCG006486.1,CCG005924.2,CCG020909.1,CCG007532.1,CCG017330.1,CCG007531.1,CCG018447.1,CCG016966.1,CCG018820.3,CCG021110.1,CCG025179.1,CCG021934.1,CCG006777.1,CCG004308.1,CCG025973.1,CCG017995.1,CCG013637.1,CCG023640.1,CCG026314.1,CCG010418.1,CCG025348.1,CCG009080.1,CCG004869.1,CCG019619.1,CCG025396.1,CCG013999.1,CCG026953.1,CCG021336.1,CCG006924.1,CCG007417.1,CCG021220.1,CCG001066.1,CCG019866.1,CCG019678.1,CCG007724.1,CCG008748.1,CCG013641.1,CCG015410.1,CCG016027.1,CCG015289.1,CCG025107.1,CCG003495.1,CCG021411.1,CCG009142.1,CCG026898.1,CCG001859.1,CCG026812.1,CCG026336.1,CCG005886.1,CCG025131.2,CCG016542.1,CCG026154.1,CCG015654.1,CCG018659.2,CCG002852.1,CCG010864.1,CCG013610.1,CCG016614.1, |
|------------|----------------------------------|------------------------|---------------------------|---|--------------------------------------------------------------------------------------------------------------------------------------------------------------------------------------------------------------------------------------------------------------------------------------------------------------------------------------------------------------------------------------------------------------------------------------------------------------------------------------------------------------------------------------------------------------------------------------------------------------------------------------------------------------------------------------------------------------------------------------------------------------------------------------------------------------------------------------------------------------------------------------------------------------------------------------------------------------------------------------------------------------------------------------------------------------------------------------------------|

|            |                                    |                        |                           |   |                                                                                                                                                                                                                                                                                                                                                                                                                                                                                                                                                                                                                                                                                                                                                                                                                                                                                                                                                                                                                                                                                                  |
|------------|------------------------------------|------------------------|---------------------------|---|--------------------------------------------------------------------------------------------------------------------------------------------------------------------------------------------------------------------------------------------------------------------------------------------------------------------------------------------------------------------------------------------------------------------------------------------------------------------------------------------------------------------------------------------------------------------------------------------------------------------------------------------------------------------------------------------------------------------------------------------------------------------------------------------------------------------------------------------------------------------------------------------------------------------------------------------------------------------------------------------------------------------------------------------------------------------------------------------------|
| GO:0019693 | ribose phosphate metabolic process | 93 of 4104 in the list | 173 of 8404 in the genome | 1 | CCG006420.1,CCG017420.1,CCG002549.1,CCG017693.1,CCG007060.1,CCG013000.1,CCG004309.1,CCG006529.1,CCG025989.2,CCG024327.1,CCG015386.1,CCG019020.1,CCG009243.1,CCG008422.1,CCG010112.1,CCG009607.1,CCG011006.1,CCG007827.1,CCG014434.1,CCG013643.1,CCG006421.1,CCG023963.3,CCG002038.1,CCG025027.1,CCG016370.1,CCG000148.1,CCG019103.1,CCG013365.1,CCG019629.2,CCG002917.1,CCG006486.1,CCG005924.2,CCG020909.1,CCG007532.1,CCG017330.1,CCG007531.1,CCG018447.1,CCG016966.1,CCG018820.3,CCG021110.1,CCG025179.1,CCG021934.1,CCG006777.1,CCG004308.1,CCG025973.1,CCG017995.1,CCG013637.1,CCG023640.1,CCG026314.1,CCG010418.1,CCG025348.1,CCG009080.1,CCG004869.1,CCG019619.1,CCG025396.1,CCG013999.1,CCG026953.1,CCG021336.1,CCG006924.1,CCG007417.1,CCG021220.1,CCG001066.1,CCG019866.1,CCG019678.1,CCG007724.1,CCG008748.1,CCG013641.1,CCG015410.1,CCG016027.1,CCG015289.1,CCG025107.1,CCG003495.1,CCG021411.1,CCG009142.1,CCG026898.1,CCG001859.1,CCG026812.1,CCG026336.1,CCG005886.1,CCG025131.2,CCG016542.1,CCG026154.1,CCG015654.1,CCG018659.2,CCG002852.1,CCG010864.1,CCG013610.1,CCG016614.1, |
|------------|------------------------------------|------------------------|---------------------------|---|--------------------------------------------------------------------------------------------------------------------------------------------------------------------------------------------------------------------------------------------------------------------------------------------------------------------------------------------------------------------------------------------------------------------------------------------------------------------------------------------------------------------------------------------------------------------------------------------------------------------------------------------------------------------------------------------------------------------------------------------------------------------------------------------------------------------------------------------------------------------------------------------------------------------------------------------------------------------------------------------------------------------------------------------------------------------------------------------------|

|            |                                                  |                        |                           |   |                                                                                                                                                                                                                                                                                                                                                                                                                                                                                                                                                                                                                                                                                                                                                                                                                                                                                                                                                  |
|------------|--------------------------------------------------|------------------------|---------------------------|---|--------------------------------------------------------------------------------------------------------------------------------------------------------------------------------------------------------------------------------------------------------------------------------------------------------------------------------------------------------------------------------------------------------------------------------------------------------------------------------------------------------------------------------------------------------------------------------------------------------------------------------------------------------------------------------------------------------------------------------------------------------------------------------------------------------------------------------------------------------------------------------------------------------------------------------------------------|
| GO:0034655 | nucleobase-containing compound catabolic process | 75 of 4104 in the list | 138 of 8404 in the genome | 1 | CCG006420.1,CCG017420.1,CCG002549.1,CCG007060.1,CCG005524.1,CCG013000.1,CCG013766.1,CCG024327.1,CCG015386.1,CCG019020.1,CCG009243.1,CCG020685.1,CCG002925.1,CCG023005.1,CCG024375.1,CCG009607.1,CCG011006.1,CCG027119.1,CCG004448.2,CCG007827.1,CCG014434.1,CCG006421.1,CCG023963.3,CCG021990.1,CCG025027.1,CCG016370.1,CCG019103.1,CCG019629.2,CCG006311.1,CCG002917.1,CCG005147.1,CCG004988.1,CCG020909.1,CCG007532.1,CCG007531.1,CCG018447.1,CCG016966.1,CCG018820.3,CCG019674.1,CCG025179.1,CCG006777.1,CCG025973.1,CCG013637.1,CCG001440.1,CCG010418.1,CCG018917.1,CCG009080.1,CCG004869.1,CCG007690.1,CCG025396.1,CCG026953.1,CCG006924.1,CCG021220.1,CCG008748.1,CCG013641.1,CCG016027.1,CCG015289.1,CCG003495.1,CCG021411.1,CCG001859.1,CCG026336.1,CCG005886.1,CCG009582.1,CCG016542.1,CCG025131.2,CCG026154.1,CCG015654.1,CCG002852.1,CCG010864.1,CCG001445.1,CCG013765.1,CCG007362.1,                                                 |
| GO:0044723 | single-organism carbohydrate metabolic process   | 78 of 4104 in the list | 144 of 8404 in the genome | 1 | CCG017381.1,CCG005588.1,CCG018536.1,CCG023617.1,CCG010373.1,CCG008437.1,CCG007046.2,CCG007766.1,CCG001602.1,CCG009803.1,CCG008287.1,CCG006358.1,CCG003220.2,CCG006203.1,CCG004091.1,CCG001355.1,CCG022453.1,CCG003748.1,CCG009494.1,CCG019825.2,CCG025472.1,CCG001038.1,CCG018432.1,CCG022035.1,CCG010996.1,CCG007045.1,CCG028524.1,CCG025307.1,CCG015986.1,CCG007023.1,CCG019693.1,CCG014579.1,CCG016653.1,CCG007771.1,CCG008317.1,CCG022430.1,CCG004760.1,CCG019210.1,CCG025277.1,CCG017651.1,CCG024762.1,CCG010700.1,CCG020616.1,CCG003215.3,CCG022108.2,CCG000331.1,CCG007981.1,CCG012268.1,CCG009928.1,CCG016003.1,CCG008130.1,CCG004388.1,CCG000431.1,CCG009084.2,CCG019953.1,CCG012740.1,CCG014260.1,CCG003247.1,CCG013129.1,CCG027131.1,CCG013318.1,CCG017197.1,CCG013985.1,CCG022214.1,CCG011451.2,CCG012840.1,CCG006213.1,CCG017278.1,CCG013339.1,CCG018423.1,CCG015587.1,CCG017200.1,CCG016373.1,CCG023757.1,CCG006221.1,CCG005177.1, |



|            |                                                                       |                       |                         |   |                                     |
|------------|-----------------------------------------------------------------------|-----------------------|-------------------------|---|-------------------------------------|
| GO:0006436 | tryptophanyl-tRNA aminoacylation                                      | 3 of 4104 in the list | 3 of 8404 in the genome | 1 | CCG008321.1,CCG017344.1,CCG026570.1 |
| GO:0006558 | L-phenylalanine metabolic process                                     | 3 of 4104 in the list | 3 of 8404 in the genome | 1 | CCG011789.1,CCG011721.1,CCG011722.1 |
| GO:0006559 | L-phenylalanine catabolic process                                     | 3 of 4104 in the list | 3 of 8404 in the genome | 1 | CCG011789.1,CCG011721.1,CCG011722.1 |
| GO:0006564 | L-serine biosynthetic process                                         | 3 of 4104 in the list | 3 of 8404 in the genome | 1 | CCG019954.3,CCG022025.2,CCG017201.1 |
| GO:0006570 | tyrosine metabolic process                                            | 3 of 4104 in the list | 3 of 8404 in the genome | 1 | CCG011789.1,CCG011721.1,CCG011722.1 |
| GO:0006637 | acyl-CoA metabolic process                                            | 3 of 4104 in the list | 3 of 8404 in the genome | 1 | CCG018113.1,CCG013216.1,CCG003683.2 |
| GO:0006729 | tetrahydrobiopterin biosynthetic process                              | 3 of 4104 in the list | 3 of 8404 in the genome | 1 | CCG021086.2,CCG023780.2,CCG003173.1 |
| GO:0007179 | transforming growth factor beta receptor signaling pathway            | 3 of 4104 in the list | 3 of 8404 in the genome | 1 | CCG018533.1,CCG022741.1,CCG016307.1 |
| GO:0008612 | peptidyl-lysine modification to hypusine                              | 3 of 4104 in the list | 3 of 8404 in the genome | 1 | CCG008932.1,CCG026155.1,CCG013043.1 |
| GO:0009896 | positive regulation of catabolic process                              | 3 of 4104 in the list | 3 of 8404 in the genome | 1 | CCG023747.3,CCG015233.1,CCG003824.3 |
| GO:0010506 | regulation of autophagy                                               | 3 of 4104 in the list | 3 of 8404 in the genome | 1 | CCG023747.3,CCG015233.1,CCG003824.3 |
| GO:0010508 | positive regulation of autophagy                                      | 3 of 4104 in the list | 3 of 8404 in the genome | 1 | CCG023747.3,CCG015233.1,CCG003824.3 |
| GO:0018205 | peptidyl-lysine modification                                          | 3 of 4104 in the list | 3 of 8404 in the genome | 1 | CCG008932.1,CCG026155.1,CCG013043.1 |
| GO:0031331 | positive regulation of cellular catabolic process                     | 3 of 4104 in the list | 3 of 8404 in the genome | 1 | CCG023747.3,CCG015233.1,CCG003824.3 |
| GO:0035383 | thioester metabolic process                                           | 3 of 4104 in the list | 3 of 8404 in the genome | 1 | CCG018113.1,CCG013216.1,CCG003683.2 |
| GO:0043244 | regulation of protein complex disassembly                             | 3 of 4104 in the list | 3 of 8404 in the genome | 1 | CCG026155.1,CCG025026.1,CCG019102.1 |
| GO:0046146 | tetrahydrobiopterin metabolic                                         | 3 of 4104 in the list | 3 of 8404 in the genome | 1 | CCG021086.2,CCG023780.2,CCG003173.1 |
| GO:0046439 | L-cysteine metabolic process                                          | 3 of 4104 in the list | 3 of 8404 in the genome | 1 | CCG006994.1,CCG025465.1,CCG018907.1 |
| GO:0046516 | hypusine metabolic process                                            | 3 of 4104 in the list | 3 of 8404 in the genome | 1 | CCG008932.1,CCG026155.1,CCG013043.1 |
| GO:0070848 | response to growth factor                                             | 3 of 4104 in the list | 3 of 8404 in the genome | 1 | CCG018533.1,CCG022741.1,CCG016307.1 |
| GO:0071363 | cellular response to growth factor stimulus                           | 3 of 4104 in the list | 3 of 8404 in the genome | 1 | CCG018533.1,CCG022741.1,CCG016307.1 |
| GO:0071559 | response to transforming growth factor beta                           | 3 of 4104 in the list | 3 of 8404 in the genome | 1 | CCG018533.1,CCG022741.1,CCG016307.1 |
| GO:0071560 | cellular response to transforming growth factor beta stimulus         | 3 of 4104 in the list | 3 of 8404 in the genome | 1 | CCG018533.1,CCG022741.1,CCG016307.1 |
| GO:1902221 | erythrose 4-phosphate/phosphoenolpyruvate family amino acid metabolic | 3 of 4104 in the list | 3 of 8404 in the genome | 1 | CCG011789.1,CCG011721.1,CCG011722.1 |

|            |                                                                       |                        |                           |   |                                                                                                                                                                                                                                                                                                                                                                                                                                                                                                                                                                                                                                                                                                                                                                                                                                                                                                                                                                                                                                                                                                  |
|------------|-----------------------------------------------------------------------|------------------------|---------------------------|---|--------------------------------------------------------------------------------------------------------------------------------------------------------------------------------------------------------------------------------------------------------------------------------------------------------------------------------------------------------------------------------------------------------------------------------------------------------------------------------------------------------------------------------------------------------------------------------------------------------------------------------------------------------------------------------------------------------------------------------------------------------------------------------------------------------------------------------------------------------------------------------------------------------------------------------------------------------------------------------------------------------------------------------------------------------------------------------------------------|
| GO:1902222 | erythrose 4-phosphate/phosphoenolpyruvate family amino acid catabolic | 3 of 4104 in the list  | 3 of 8404 in the genome   | 1 | CCG011789.1,CCG011721.1,CCG011722.1                                                                                                                                                                                                                                                                                                                                                                                                                                                                                                                                                                                                                                                                                                                                                                                                                                                                                                                                                                                                                                                              |
| GO:0006413 | translational initiation                                              | 20 of 4104 in the list | 33 of 8404 in the genome  | 1 | CCG021940.1,CCG021933.1,CCG004807.1,CCG005622.1,CCG021944.1,CCG018168.1,CCG000368.1,CCG018719.1,CCG018164.1,CCG014819.1,CCG001777.1,CCG027281.1,CCG024529.1,CCG006344.1,CCG014947.2,CCG021521.1,CCG008592.1,CCG026825.1,CCG007705.1,CCG000294.1                                                                                                                                                                                                                                                                                                                                                                                                                                                                                                                                                                                                                                                                                                                                                                                                                                                  |
| GO:0009150 | purine ribonucleotide metabolic process                               | 91 of 4104 in the list | 170 of 8404 in the genome | 1 | CCG006420.1,CCG017420.1,CCG002549.1,CCG017693.1,CCG007060.1,CCG013000.1,CCG004309.1,CCG006529.1,CCG025989.2,CCG024327.1,CCG015386.1,CCG019020.1,CCG009243.1,CCG008422.1,CCG010112.1,CCG009607.1,CCG011006.1,CCG007827.1,CCG014434.1,CCG013643.1,CCG006421.1,CCG023963.3,CCG002038.1,CCG025027.1,CCG016370.1,CCG000148.1,CCG019103.1,CCG013365.1,CCG019629.2,CCG002917.1,CCG006486.1,CCG005924.2,CCG020909.1,CCG007532.1,CCG017330.1,CCG007531.1,CCG018447.1,CCG016966.1,CCG018820.3,CCG021110.1,CCG025179.1,CCG021934.1,CCG006777.1,CCG004308.1,CCG025973.1,CCG017995.1,CCG013637.1,CCG023640.1,CCG026314.1,CCG010418.1,CCG025348.1,CCG009080.1,CCG004869.1,CCG019619.1,CCG025396.1,CCG013999.1,CCG026953.1,CCG021336.1,CCG006924.1,CCG007417.1,CCG021220.1,CCG001066.1,CCG019866.1,CCG019678.1,CCG007724.1,CCG008748.1,CCG013641.1,CCG015410.1,CCG016027.1,CCG015289.1,CCG025107.1,CCG003495.1,CCG021411.1,CCG009142.1,CCG026898.1,CCG001859.1,CCG026812.1,CCG026336.1,CCG005886.1,CCG025131.2,CCG016542.1,CCG026154.1,CCG015654.1,CCG018659.2,CCG002852.1,CCG010864.1,CCG028305.1,CCG006791.1, |
| GO:0032012 | regulation of ARF protein signal transduction                         | 15 of 4104 in the list | 24 of 8404 in the genome  | 1 | CCG016454.1,CCG028651.1,CCG021442.1,CCG022083.1,CCG022394.1,CCG021263.1,CCG019462.1,CCG004132.1,CCG022749.1,CCG025470.1,CCG022420.1,CCG010260.1,CCG010157.1,CCG020983.1,CCG025554.1                                                                                                                                                                                                                                                                                                                                                                                                                                                                                                                                                                                                                                                                                                                                                                                                                                                                                                              |
| GO:0009147 | pyrimidine nucleoside triphosphate metabolic process                  | 6 of 4104 in the list  | 8 of 8404 in the genome   | 1 | CCG021110.1,CCG010960.2,CCG006529.1,CCG016222.1,CCG017995.1,CCG007417.1                                                                                                                                                                                                                                                                                                                                                                                                                                                                                                                                                                                                                                                                                                                                                                                                                                                                                                                                                                                                                          |

|            |                                                        |                        |                           |   |                                                                                                                                                                                                                                                                                                                                                                                                                                                                                                                                                                                                                                                                                                                                                                                                                                                                                                                                                 |
|------------|--------------------------------------------------------|------------------------|---------------------------|---|-------------------------------------------------------------------------------------------------------------------------------------------------------------------------------------------------------------------------------------------------------------------------------------------------------------------------------------------------------------------------------------------------------------------------------------------------------------------------------------------------------------------------------------------------------------------------------------------------------------------------------------------------------------------------------------------------------------------------------------------------------------------------------------------------------------------------------------------------------------------------------------------------------------------------------------------------|
| GO:0009262 | deoxyribonucleotide metabolic process                  | 6 of 4104 in the list  | 8 of 8404 in the genome   | 1 | CCG001445.1,CCG001440.1,CCG010960.2,CCG016222.1,CCG004180.1,CCG014116.1                                                                                                                                                                                                                                                                                                                                                                                                                                                                                                                                                                                                                                                                                                                                                                                                                                                                         |
| GO:0042775 | mitochondrial ATP synthesis coupled electron transport | 6 of 4104 in the list  | 8 of 8404 in the genome   | 1 | CCG020879.1,CCG006459.1,CCG001649.1,CCG025163.3,CCG024297.1,CCG006864.1                                                                                                                                                                                                                                                                                                                                                                                                                                                                                                                                                                                                                                                                                                                                                                                                                                                                         |
| GO:0052646 | alditol phosphate metabolic process                    | 6 of 4104 in the list  | 8 of 8404 in the genome   | 1 | CCG009685.1,CCG000970.1,CCG025146.1,CCG021610.1,CCG012558.1,CCG014228.2                                                                                                                                                                                                                                                                                                                                                                                                                                                                                                                                                                                                                                                                                                                                                                                                                                                                         |
| GO:0006221 | pyrimidine nucleotide biosynthetic process             | 10 of 4104 in the list | 15 of 8404 in the genome  | 1 | CCG025493.1,CCG013610.1,CCG016614.1,CCG004180.1,CCG017995.1,CCG007417.1,CCG021110.1,CCG006529.1,CCG023452.1,CCG014116.1                                                                                                                                                                                                                                                                                                                                                                                                                                                                                                                                                                                                                                                                                                                                                                                                                         |
| GO:0044270 | cellular nitrogen compound catabolic process           | 77 of 4104 in the list | 143 of 8404 in the genome | 1 | CCG006420.1,CCG017420.1,CCG002549.1,CCG007060.1,CCG005524.1,CCG013000.1,CCG013766.1,CCG024327.1,CCG015386.1,CCG019020.1,CCG009243.1,CCG020685.1,CCG002925.1,CCG023005.1,CCG024375.1,CCG009607.1,CCG011006.1,CCG027119.1,CCG004448.2,CCG007827.1,CCG014434.1,CCG006421.1,CCG023963.3,CCG021990.1,CCG025027.1,CCG016370.1,CCG019103.1,CCG019629.2,CCG006311.1,CCG002917.1,CCG005147.1,CCG004988.1,CCG020909.1,CCG007532.1,CCG007531.1,CCG018447.1,CCG016966.1,CCG018820.3,CCG019674.1,CCG025179.1,CCG006777.1,CCG025973.1,CCG013637.1,CCG009424.1,CCG001440.1,CCG010418.1,CCG018917.1,CCG009080.1,CCG004869.1,CCG007690.1,CCG025396.1,CCG026953.1,CCG006924.1,CCG021220.1,CCG008748.1,CCG006059.1,CCG013641.1,CCG016027.1,CCG015289.1,CCG003495.1,CCG021411.1,CCG001859.1,CCG026336.1,CCG005886.1,CCG009582.1,CCG016542.1,CCG025131.2,CCG026154.1,CCG015654.1,CCG002852.1,CCG010864.1,CCG001445.1,CCG013765.1,CCG007362.1,CCG021152.1,CCG023526.2 |

|            |                                            |                         |                           |   |                                                                                                                                                                                                                                                                                                                                                                                                                                                                                                                                                                                                                                                                                                                                                                                                                                                                                                                                                                                                                                                                                                                                                                                                                                                                                                                                                                                                                                                                                                  |
|------------|--------------------------------------------|-------------------------|---------------------------|---|--------------------------------------------------------------------------------------------------------------------------------------------------------------------------------------------------------------------------------------------------------------------------------------------------------------------------------------------------------------------------------------------------------------------------------------------------------------------------------------------------------------------------------------------------------------------------------------------------------------------------------------------------------------------------------------------------------------------------------------------------------------------------------------------------------------------------------------------------------------------------------------------------------------------------------------------------------------------------------------------------------------------------------------------------------------------------------------------------------------------------------------------------------------------------------------------------------------------------------------------------------------------------------------------------------------------------------------------------------------------------------------------------------------------------------------------------------------------------------------------------|
| GO:0006355 | regulation of transcription, DNA-templated | 249 of 4104 in the list | 485 of 8404 in the genome | 1 | CCG019737.1,CCG017812.1,CCG022266.1,CCG015241.1,CCG003291.1,CCG008767.3,CCG001799.1,CCG021944.1,CCG008741.1,CCG017795.1,CCG003390.1,CCG005898.1,CCG018346.1,CCG027427.1,CCG012958.1,CCG007493.1,CCG011229.1,CCG016772.1,CCG021465.1,CCG003175.1,CCG028032.1,CCG001978.1,CCG023752.1,CCG028326.3,CCG013794.1,CCG006134.1,CCG009970.1,CCG011092.1,CCG022741.1,CCG016745.1,CCG021436.1,CCG012536.1,CCG015773.1,CCG000659.1,CCG027127.1,CCG018719.1,CCG015425.1,CCG027796.1,CCG022824.1,CCG012372.1,CCG018533.1,CCG024710.1,CCG022281.1,CCG011465.1,CCG025856.1,CCG020129.1,CCG027186.1,CCG008229.1,CCG018515.1,CCG013077.1,CCG020044.1,CCG000588.1,CCG022045.1,CCG017156.1,CCG012902.1,CCG013274.1,CCG028568.1,CCG024689.1,CCG013879.1,CCG007647.1,CCG021633.1,CCG000587.1,CCG012083.1,CCG000562.1,CCG028528.2,CCG004861.1,CCG014682.1,CCG018068.1,CCG012009.1,CCG005480.2,CCG017760.1,CCG016859.1,CCG020898.1,CCG017591.1,CCG002390.1,CCG002198.1,CCG021284.1,CCG023588.1,CCG016924.1,CCG009894.1,CCG011710.1,CCG000133.1,CCG013224.2,CCG002273.1,CCG002039.1,CCG001698.1,CCG023777.1,CCG014461.1,CCG026228.2,CCG027658.1,CCG021054.1,CCG022286.1,CCG016307.1,CCG022434.1,CCG009805.2,CCG016749.1,CCG012792.1,CCG017524.1,CCG028465.1,CCG002422.1,CCG019250.1,CCG019222.1,CCG005396.1,CCG010702.1,CCG001096.1,CCG025747.1,CCG009823.1,CCG014983.1,CCG021456.1,CCG014928.1,CCG005168.1,CCG018184.1,CCG018315.1,CCG027580.1,CCG010140.1,CCG027118.1,CCG024271.1,CCG024319.1,CCG005895.1,CCG009458.1, |
|------------|--------------------------------------------|-------------------------|---------------------------|---|--------------------------------------------------------------------------------------------------------------------------------------------------------------------------------------------------------------------------------------------------------------------------------------------------------------------------------------------------------------------------------------------------------------------------------------------------------------------------------------------------------------------------------------------------------------------------------------------------------------------------------------------------------------------------------------------------------------------------------------------------------------------------------------------------------------------------------------------------------------------------------------------------------------------------------------------------------------------------------------------------------------------------------------------------------------------------------------------------------------------------------------------------------------------------------------------------------------------------------------------------------------------------------------------------------------------------------------------------------------------------------------------------------------------------------------------------------------------------------------------------|

|            |                                     |                         |                           |   |                                                                                                                                                                                                                                                                                                                                                                                                                                                                                                                                                                                                                                                                                                                                                                                                                                                                                                                                                                                                                                                                                                                                                                                                                                                                                                                                                                                                                                                                                                  |
|------------|-------------------------------------|-------------------------|---------------------------|---|--------------------------------------------------------------------------------------------------------------------------------------------------------------------------------------------------------------------------------------------------------------------------------------------------------------------------------------------------------------------------------------------------------------------------------------------------------------------------------------------------------------------------------------------------------------------------------------------------------------------------------------------------------------------------------------------------------------------------------------------------------------------------------------------------------------------------------------------------------------------------------------------------------------------------------------------------------------------------------------------------------------------------------------------------------------------------------------------------------------------------------------------------------------------------------------------------------------------------------------------------------------------------------------------------------------------------------------------------------------------------------------------------------------------------------------------------------------------------------------------------|
| GO:0051252 | regulation of RNA metabolic process | 249 of 4104 in the list | 485 of 8404 in the genome | 1 | CCG019737.1,CCG017812.1,CCG022266.1,CCG015241.1,CCG003291.1,CCG008767.3,CCG001799.1,CCG021944.1,CCG008741.1,CCG017795.1,CCG003390.1,CCG005898.1,CCG018346.1,CCG027427.1,CCG012958.1,CCG007493.1,CCG011229.1,CCG016772.1,CCG021465.1,CCG003175.1,CCG028032.1,CCG001978.1,CCG023752.1,CCG028326.3,CCG013794.1,CCG006134.1,CCG009970.1,CCG011092.1,CCG022741.1,CCG016745.1,CCG021436.1,CCG012536.1,CCG015773.1,CCG000659.1,CCG027127.1,CCG018719.1,CCG015425.1,CCG027796.1,CCG022824.1,CCG012372.1,CCG018533.1,CCG024710.1,CCG022281.1,CCG011465.1,CCG025856.1,CCG020129.1,CCG027186.1,CCG008229.1,CCG018515.1,CCG013077.1,CCG020044.1,CCG000588.1,CCG022045.1,CCG017156.1,CCG012902.1,CCG013274.1,CCG028568.1,CCG024689.1,CCG013879.1,CCG007647.1,CCG021633.1,CCG000587.1,CCG012083.1,CCG000562.1,CCG028528.2,CCG004861.1,CCG014682.1,CCG018068.1,CCG012009.1,CCG005480.2,CCG017760.1,CCG016859.1,CCG020898.1,CCG017591.1,CCG002390.1,CCG002198.1,CCG021284.1,CCG023588.1,CCG016924.1,CCG009894.1,CCG011710.1,CCG000133.1,CCG013224.2,CCG002273.1,CCG002039.1,CCG001698.1,CCG023777.1,CCG014461.1,CCG026228.2,CCG027658.1,CCG021054.1,CCG022286.1,CCG016307.1,CCG022434.1,CCG009805.2,CCG016749.1,CCG012792.1,CCG017524.1,CCG028465.1,CCG002422.1,CCG019250.1,CCG019222.1,CCG005396.1,CCG010702.1,CCG001096.1,CCG025747.1,CCG009823.1,CCG014983.1,CCG021456.1,CCG014928.1,CCG005168.1,CCG018184.1,CCG018315.1,CCG027580.1,CCG010140.1,CCG027118.1,CCG024271.1,CCG024319.1,CCG005895.1,CCG009458.1, |
|------------|-------------------------------------|-------------------------|---------------------------|---|--------------------------------------------------------------------------------------------------------------------------------------------------------------------------------------------------------------------------------------------------------------------------------------------------------------------------------------------------------------------------------------------------------------------------------------------------------------------------------------------------------------------------------------------------------------------------------------------------------------------------------------------------------------------------------------------------------------------------------------------------------------------------------------------------------------------------------------------------------------------------------------------------------------------------------------------------------------------------------------------------------------------------------------------------------------------------------------------------------------------------------------------------------------------------------------------------------------------------------------------------------------------------------------------------------------------------------------------------------------------------------------------------------------------------------------------------------------------------------------------------|

|            |                                        |                         |                           |   |                                                                                                                                                                                                                                                                                                                                                                                                                                                                                                                                                                                                                                                                                                                                                                                                                                                                                                                                                                                                                                                                                                                                                                                                                                                                                                                                                                                                                                                                                                  |
|------------|----------------------------------------|-------------------------|---------------------------|---|--------------------------------------------------------------------------------------------------------------------------------------------------------------------------------------------------------------------------------------------------------------------------------------------------------------------------------------------------------------------------------------------------------------------------------------------------------------------------------------------------------------------------------------------------------------------------------------------------------------------------------------------------------------------------------------------------------------------------------------------------------------------------------------------------------------------------------------------------------------------------------------------------------------------------------------------------------------------------------------------------------------------------------------------------------------------------------------------------------------------------------------------------------------------------------------------------------------------------------------------------------------------------------------------------------------------------------------------------------------------------------------------------------------------------------------------------------------------------------------------------|
| GO:2001141 | regulation of RNA biosynthetic process | 249 of 4104 in the list | 485 of 8404 in the genome | 1 | CCG019737.1,CCG017812.1,CCG022266.1,CCG015241.1,CCG003291.1,CCG008767.3,CCG001799.1,CCG021944.1,CCG008741.1,CCG017795.1,CCG003390.1,CCG005898.1,CCG018346.1,CCG027427.1,CCG012958.1,CCG007493.1,CCG011229.1,CCG016772.1,CCG021465.1,CCG003175.1,CCG028032.1,CCG001978.1,CCG023752.1,CCG028326.3,CCG013794.1,CCG006134.1,CCG009970.1,CCG011092.1,CCG022741.1,CCG016745.1,CCG021436.1,CCG012536.1,CCG015773.1,CCG000659.1,CCG027127.1,CCG018719.1,CCG015425.1,CCG027796.1,CCG022824.1,CCG012372.1,CCG018533.1,CCG024710.1,CCG022281.1,CCG011465.1,CCG025856.1,CCG020129.1,CCG027186.1,CCG008229.1,CCG018515.1,CCG013077.1,CCG020044.1,CCG000588.1,CCG022045.1,CCG017156.1,CCG012902.1,CCG013274.1,CCG028568.1,CCG024689.1,CCG013879.1,CCG007647.1,CCG021633.1,CCG000587.1,CCG012083.1,CCG000562.1,CCG028528.2,CCG004861.1,CCG014682.1,CCG018068.1,CCG012009.1,CCG005480.2,CCG017760.1,CCG016859.1,CCG020898.1,CCG017591.1,CCG002390.1,CCG002198.1,CCG021284.1,CCG023588.1,CCG016924.1,CCG009894.1,CCG011710.1,CCG000133.1,CCG013224.2,CCG002273.1,CCG002039.1,CCG001698.1,CCG023777.1,CCG014461.1,CCG026228.2,CCG027658.1,CCG021054.1,CCG022286.1,CCG016307.1,CCG022434.1,CCG009805.2,CCG016749.1,CCG012792.1,CCG017524.1,CCG028465.1,CCG002422.1,CCG019250.1,CCG019222.1,CCG005396.1,CCG010702.1,CCG001096.1,CCG025747.1,CCG009823.1,CCG014983.1,CCG021456.1,CCG014928.1,CCG005168.1,CCG018184.1,CCG018315.1,CCG027580.1,CCG010140.1,CCG027118.1,CCG024271.1,CCG024319.1,CCG005895.1,CCG009458.1, |
|------------|----------------------------------------|-------------------------|---------------------------|---|--------------------------------------------------------------------------------------------------------------------------------------------------------------------------------------------------------------------------------------------------------------------------------------------------------------------------------------------------------------------------------------------------------------------------------------------------------------------------------------------------------------------------------------------------------------------------------------------------------------------------------------------------------------------------------------------------------------------------------------------------------------------------------------------------------------------------------------------------------------------------------------------------------------------------------------------------------------------------------------------------------------------------------------------------------------------------------------------------------------------------------------------------------------------------------------------------------------------------------------------------------------------------------------------------------------------------------------------------------------------------------------------------------------------------------------------------------------------------------------------------|

|            |                                          |                          |                            |   |                                                                                                                                                                                                                                                                                                                                                                                                                                                                                                                                                                                                                                                                                                                                                                                                                                                                                                                                                                                                                                                                                                                                                                                                                                                                                                                                                                                                                                                                                                  |
|------------|------------------------------------------|--------------------------|----------------------------|---|--------------------------------------------------------------------------------------------------------------------------------------------------------------------------------------------------------------------------------------------------------------------------------------------------------------------------------------------------------------------------------------------------------------------------------------------------------------------------------------------------------------------------------------------------------------------------------------------------------------------------------------------------------------------------------------------------------------------------------------------------------------------------------------------------------------------------------------------------------------------------------------------------------------------------------------------------------------------------------------------------------------------------------------------------------------------------------------------------------------------------------------------------------------------------------------------------------------------------------------------------------------------------------------------------------------------------------------------------------------------------------------------------------------------------------------------------------------------------------------------------|
| GO:0044260 | cellular macromolecule metabolic process | 1189 of 4104 in the list | 2388 of 8404 in the genome | 1 | CCG014531.2,CCG027068.1,CCG014396.1,CCG006549.1,CCG004887.1,CCG026106.1,CCG016952.1,CCG026174.1,CCG004468.1,CCG012726.1,CCG024584.1,CCG001292.1,CCG018432.1,CCG001040.1,CCG017266.1,CCG028198.1,CCG016689.2,CCG025208.1,CCG021479.1,CCG003362.1,CCG019113.1,CCG023381.1,CCG019382.1,CCG019735.1,CCG016094.1,CCG026413.3,CCG023474.1,CCG026871.2,CCG010792.1,CCG012623.1,CCG021616.1,CCG005738.1,CCG013876.1,CCG010905.1,CCG008270.1,CCG024612.1,CCG027636.1,CCG028653.1,CCG004569.1,CCG020286.1,CCG013109.1,CCG006465.1,CCG015074.1,CCG019571.1,CCG008871.1,CCG015694.1,CCG018788.1,CCG006484.1,CCG002982.1,CCG012083.1,CCG026602.1,CCG023686.1,CCG007457.1,CCG021737.1,CCG025990.1,CCG015350.1,CCG021948.1,CCG020651.1,CCG005284.1,CCG004927.1,CCG009805.2,CCG021137.1,CCG022056.1,CCG001876.1,CCG012584.1,CCG015186.1,CCG016327.2,CCG018688.1,CCG024200.1,CCG010624.1,CCG023458.1,CCG027748.1,CCG017001.1,CCG021767.1,CCG003520.1,CCG004926.1,CCG006928.1,CCG017381.1,CCG010912.1,CCG004955.1,CCG007874.3,CCG001704.1,CCG005524.1,CCG013640.1,CCG008404.1,CCG018201.1,CCG010136.1,CCG009574.1,CCG022370.1,CCG010112.1,CCG009038.1,CCG022513.2,CCG007750.2,CCG025707.1,CCG028092.1,CCG020078.1,CCG000209.1,CCG023486.1,CCG001395.1,CCG016557.1,CCG005594.1,CCG024922.1,CCG027000.1,CCG022183.1,CCG006804.1,CCG018168.1,CCG006264.1,CCG019426.1,CCG009394.1,CCG024760.1,CCG011015.1,CCG009177.1,CCG014222.1,CCG008498.1,CCG000612.1,CCG012278.1,CCG008367.1,CCG010797.1,CCG004008.1,CCG010138.1, |
|------------|------------------------------------------|--------------------------|----------------------------|---|--------------------------------------------------------------------------------------------------------------------------------------------------------------------------------------------------------------------------------------------------------------------------------------------------------------------------------------------------------------------------------------------------------------------------------------------------------------------------------------------------------------------------------------------------------------------------------------------------------------------------------------------------------------------------------------------------------------------------------------------------------------------------------------------------------------------------------------------------------------------------------------------------------------------------------------------------------------------------------------------------------------------------------------------------------------------------------------------------------------------------------------------------------------------------------------------------------------------------------------------------------------------------------------------------------------------------------------------------------------------------------------------------------------------------------------------------------------------------------------------------|

|            |                                   |                        |                           |   |                                                                                                                                                                                                                                                                                                                                                                                                                                                                                                                                                                                                                                                                                                                                                                                                                                                 |
|------------|-----------------------------------|------------------------|---------------------------|---|-------------------------------------------------------------------------------------------------------------------------------------------------------------------------------------------------------------------------------------------------------------------------------------------------------------------------------------------------------------------------------------------------------------------------------------------------------------------------------------------------------------------------------------------------------------------------------------------------------------------------------------------------------------------------------------------------------------------------------------------------------------------------------------------------------------------------------------------------|
| GO:0046434 | organophosphate catabolic process | 68 of 4104 in the list | 126 of 8404 in the genome | 1 | CCG006420.1,CCG017420.1,CCG002549.1,CCG007060.1,CCG013000.1,CCG013766.1,CCG024327.1,CCG015386.1,CCG019020.1,CCG009243.1,CCG009685.1,CCG002925.1,CCG023005.1,CCG024375.1,CCG009607.1,CCG011006.1,CCG027119.1,CCG007827.1,CCG014434.1,CCG006421.1,CCG023963.3,CCG021990.1,CCG025027.1,CCG016370.1,CCG019103.1,CCG019629.2,CCG006311.1,CCG002917.1,CCG005147.1,CCG004988.1,CCG020909.1,CCG007532.1,CCG007531.1,CCG018447.1,CCG016966.1,CCG018820.3,CCG025179.1,CCG006777.1,CCG025973.1,CCG013637.1,CCG001440.1,CCG010418.1,CCG009080.1,CCG004869.1,CCG025396.1,CCG026953.1,CCG006924.1,CCG021220.1,CCG008748.1,CCG013641.1,CCG016027.1,CCG015289.1,CCG003495.1,CCG021411.1,CCG001859.1,CCG026336.1,CCG005886.1,CCG016542.1,CCG025131.2,CCG015654.1,CCG026154.1,CCG002852.1,CCG010864.1,CCG001445.1,CCG013765.1,CCG007362.1,CCG021152.1,CCG023526.2 |
| GO:0006497 | protein lipidation                | 17 of 4104 in the list | 28 of 8404 in the genome  | 1 | CCG022209.1,CCG017241.1,CCG025177.1,CCG009434.1,CCG014839.1,CCG000663.1,CCG013131.1,CCG026370.1,CCG025889.1,CCG004806.1,CCG000552.1,CCG022255.1,CCG024760.1,CCG028332.1,CCG007330.1,CCG011531.1,                                                                                                                                                                                                                                                                                                                                                                                                                                                                                                                                                                                                                                                |
| GO:0042157 | lipoprotein metabolic process     | 17 of 4104 in the list | 28 of 8404 in the genome  | 1 | CCG022209.1,CCG017241.1,CCG025177.1,CCG009434.1,CCG014839.1,CCG000663.1,CCG013131.1,CCG026370.1,CCG025889.1,CCG004806.1,CCG000552.1,CCG022255.1,CCG024760.1,CCG028332.1,CCG007330.1,CCG011531.1,                                                                                                                                                                                                                                                                                                                                                                                                                                                                                                                                                                                                                                                |
| GO:0042158 | lipoprotein biosynthetic process  | 17 of 4104 in the list | 28 of 8404 in the genome  | 1 | CCG022209.1,CCG017241.1,CCG025177.1,CCG009434.1,CCG014839.1,CCG000663.1,CCG013131.1,CCG026370.1,CCG025889.1,CCG004806.1,CCG000552.1,CCG022255.1,CCG024760.1,CCG028332.1,CCG007330.1,CCG011531.1,                                                                                                                                                                                                                                                                                                                                                                                                                                                                                                                                                                                                                                                |
| GO:0071705 | nitrogen compound transport       | 17 of 4104 in the list | 28 of 8404 in the genome  | 1 | CCG006348.1,CCG011567.1,CCG005539.1,CCG021221.1,CCG023244.1,CCG026667.1,CCG009454.1,CCG024222.1,CCG005768.1,CCG005769.1,CCG018073.1,CCG020840.1,CCG026989.1,CCG010135.1,CCG019407.1,CCG017874.1,                                                                                                                                                                                                                                                                                                                                                                                                                                                                                                                                                                                                                                                |



|            |                         |                         |                           |   |                                                                                                                                                                                                                                                                                                                                                                                                                                                                                                                                                                                                                                                                                                                                                                                                                                                                                                                                                                                                                                                                                                                                                                                                                                                                                                                                                                                                                                                                                                  |
|------------|-------------------------|-------------------------|---------------------------|---|--------------------------------------------------------------------------------------------------------------------------------------------------------------------------------------------------------------------------------------------------------------------------------------------------------------------------------------------------------------------------------------------------------------------------------------------------------------------------------------------------------------------------------------------------------------------------------------------------------------------------------------------------------------------------------------------------------------------------------------------------------------------------------------------------------------------------------------------------------------------------------------------------------------------------------------------------------------------------------------------------------------------------------------------------------------------------------------------------------------------------------------------------------------------------------------------------------------------------------------------------------------------------------------------------------------------------------------------------------------------------------------------------------------------------------------------------------------------------------------------------|
| GO:0055085 | transmembrane transport | 276 of 4104 in the list | 540 of 8404 in the genome | 1 | CCG005307.1,CCG020245.1,CCG010623.2,CCG021740.1,CCG000585.1,CCG000205.1,CCG001468.1,CCG019285.1,CCG000300.1,CCG003878.1,CCG022794.1,CCG002389.1,CCG017210.1,CCG014382.1,CCG016326.1,CCG023583.1,CCG001379.1,CCG009367.1,CCG025274.1,CCG009530.1,CCG003934.1,CCG017240.1,CCG018883.1,CCG012307.1,CCG025450.1,CCG018133.1,CCG018416.1,CCG014240.1,CCG006525.1,CCG016754.1,CCG026050.1,CCG009208.1,CCG019655.1,CCG009668.1,CCG005330.1,CCG016269.1,CCG009207.1,CCG011830.1,CCG014793.1,CCG016267.1,CCG024222.1,CCG026293.1,CCG018264.1,CCG017477.1,CCG005391.2,CCG018263.1,CCG007597.1,CCG016756.1,CCG015530.1,CCG022587.1,CCG009959.1,CCG016719.1,CCG000983.1,CCG022488.2,CCG001285.1,CCG011829.1,CCG016753.1,CCG008709.1,CCG011252.1,CCG008403.1,CCG008422.1,CCG022802.1,CCG010112.1,CCG020491.1,CCG027154.1,CCG001652.1,CCG016266.1,CCG000080.1,CCG001267.1,CCG026819.1,CCG012195.1,CCG025467.2,CCG011827.1,CCG009811.1,CCG018271.1,CCG010663.1,CCG002135.1,CCG019611.1,CCG000148.1,CCG025510.1,CCG000809.1,CCG021125.1,CCG025611.1,CCG016459.1,CCG021934.1,CCG019890.1,CCG023983.1,CCG012326.1,CCG001585.1,CCG001453.2,CCG006770.1,CCG011634.1,CCG010872.1,CCG022510.1,CCG018753.1,CCG018073.1,CCG016278.1,CCG016956.1,CCG001066.1,CCG019407.1,CCG007691.1,CCG007724.1,CCG027971.1,CCG022511.1,CCG025568.1,CCG006348.1,CCG009368.1,CCG025107.1,CCG018455.1,CCG021273.1,CCG024625.1,CCG017290.1,CCG018265.1,CCG025851.1,CCG010965.1,CCG016268.2,CCG021007.1,CCG015823.1,CCG025989.2,CCG020949.1, |
|------------|-------------------------|-------------------------|---------------------------|---|--------------------------------------------------------------------------------------------------------------------------------------------------------------------------------------------------------------------------------------------------------------------------------------------------------------------------------------------------------------------------------------------------------------------------------------------------------------------------------------------------------------------------------------------------------------------------------------------------------------------------------------------------------------------------------------------------------------------------------------------------------------------------------------------------------------------------------------------------------------------------------------------------------------------------------------------------------------------------------------------------------------------------------------------------------------------------------------------------------------------------------------------------------------------------------------------------------------------------------------------------------------------------------------------------------------------------------------------------------------------------------------------------------------------------------------------------------------------------------------------------|

|            |                       |                         |                            |   |                                                                                                                                                                                                                                                                                                                                                                                                                                                                                                                                                                                                                                                                                                                                                                                                                                                                                                                                                                                                                                                                                                                                                                                                                                                                                                                                                                                                                                                                                                  |
|------------|-----------------------|-------------------------|----------------------------|---|--------------------------------------------------------------------------------------------------------------------------------------------------------------------------------------------------------------------------------------------------------------------------------------------------------------------------------------------------------------------------------------------------------------------------------------------------------------------------------------------------------------------------------------------------------------------------------------------------------------------------------------------------------------------------------------------------------------------------------------------------------------------------------------------------------------------------------------------------------------------------------------------------------------------------------------------------------------------------------------------------------------------------------------------------------------------------------------------------------------------------------------------------------------------------------------------------------------------------------------------------------------------------------------------------------------------------------------------------------------------------------------------------------------------------------------------------------------------------------------------------|
| GO:0065007 | biological regulation | 703 of 4104 in the list | 1402 of 8404 in the genome | 1 | CCG005254.1,CCG017420.1,CCG027068.1,CCG014340.1,CCG005375.1,CCG022266.1,CCG003824.3,CCG008603.1,CCG008767.3,CCG008741.1,CCG003390.1,CCG000646.1,CCG004595.1,CCG007493.1,CCG026174.1,CCG020785.1,CCG010849.1,CCG002338.1,CCG021465.1,CCG003587.1,CCG020974.1,CCG002841.1,CCG018321.1,CCG013794.1,CCG010275.1,CCG026360.1,CCG021064.1,CCG006134.1,CCG017266.1,CCG016689.2,CCG020709.1,CCG014466.1,CCG015101.1,CCG012536.1,CCG027127.1,CCG015425.1,CCG027796.1,CCG022824.1,CCG018533.1,CCG024710.1,CCG000526.1,CCG022281.1,CCG027669.1,CCG015967.1,CCG021661.1,CCG022420.1,CCG013308.1,CCG023579.1,CCG006714.1,CCG025026.1,CCG010157.1,CCG011911.1,CCG008685.1,CCG004132.1,CCG000588.1,CCG004548.1,CCG022045.1,CCG004279.1,CCG013274.1,CCG024663.1,CCG028568.1,CCG022676.1,CCG007647.1,CCG004331.1,CCG018494.1,CCG024809.1,CCG012083.1,CCG026953.1,CCG017760.1,CCG018380.1,CCG016859.1,CCG005486.1,CCG017498.1,CCG020898.1,CCG017591.1,CCG023464.1,CCG002198.1,CCG021284.1,CCG001579.1,CCG013641.1,CCG016924.1,CCG000732.1,CCG003317.1,CCG000133.1,CCG003495.1,CCG013224.2,CCG002273.1,CCG007951.1,CCG023777.1,CCG026228.2,CCG005487.1,CCG025131.2,CCG009805.2,CCG028465.1,CCG008444.1,CCG017701.1,CCG009823.1,CCG014712.1,CCG000876.1,CCG021456.1,CCG025057.1,CCG024664.1,CCG015638.1,CCG000789.1,CCG024662.1,CCG026047.1,CCG022496.1,CCG024000.1,CCG008939.1,CCG018164.1,CCG019427.1,CCG001431.2,CCG016760.1,CCG014345.2,CCG021521.1,CCG010139.1,CCG006787.1,CCG028500.2,CCG020654.1,CCG015426.1, |
|------------|-----------------------|-------------------------|----------------------------|---|--------------------------------------------------------------------------------------------------------------------------------------------------------------------------------------------------------------------------------------------------------------------------------------------------------------------------------------------------------------------------------------------------------------------------------------------------------------------------------------------------------------------------------------------------------------------------------------------------------------------------------------------------------------------------------------------------------------------------------------------------------------------------------------------------------------------------------------------------------------------------------------------------------------------------------------------------------------------------------------------------------------------------------------------------------------------------------------------------------------------------------------------------------------------------------------------------------------------------------------------------------------------------------------------------------------------------------------------------------------------------------------------------------------------------------------------------------------------------------------------------|

|            |                                              |                         |                            |   |                                                                                                                                                                                                                                                                                                                                                                                                                                                                                                                                                                                                                                                                                                                                                                                                                                                                                                                                                                                                                                                                                                                                                                                                                                                                                                                                                                                                                                                                                                  |
|------------|----------------------------------------------|-------------------------|----------------------------|---|--------------------------------------------------------------------------------------------------------------------------------------------------------------------------------------------------------------------------------------------------------------------------------------------------------------------------------------------------------------------------------------------------------------------------------------------------------------------------------------------------------------------------------------------------------------------------------------------------------------------------------------------------------------------------------------------------------------------------------------------------------------------------------------------------------------------------------------------------------------------------------------------------------------------------------------------------------------------------------------------------------------------------------------------------------------------------------------------------------------------------------------------------------------------------------------------------------------------------------------------------------------------------------------------------------------------------------------------------------------------------------------------------------------------------------------------------------------------------------------------------|
| GO:1901360 | organic cyclic compound<br>metabolic process | 839 of 4104 in the list | 1678 of 8404 in the genome | 1 | CCG017420.1,CCG027300.1,CCG014396.1,CCG006549.1,CCG026106.1,CCG006357.1,CCG009878.1,CCG024072.1,CCG026174.1,CCG020685.1,CCG013625.1,CCG004468.1,CCG023989.1,CCG016238.1,CCG024584.1,CCG001292.1,CCG016220.1,CCG018321.1,CCG002470.1,CCG005194.1,CCG001040.1,CCG014836.1,CCG025208.1,CCG025307.1,CCG019382.1,CCG016370.1,CCG016094.1,CCG027183.2,CCG023474.1,CCG010792.1,CCG004231.1,CCG012623.1,CCG005053.1,CCG010905.1,CCG011722.1,CCG020471.1,CCG021110.1,CCG010909.1,CCG023129.1,CCG028653.1,CCG021342.1,CCG024326.1,CCG014946.1,CCG020286.1,CCG002735.1,CCG027133.1,CCG021086.2,CCG014280.1,CCG015694.1,CCG013865.1,CCG025396.1,CCG006484.1,CCG026953.1,CCG001461.1,CCG023686.1,CCG004402.1,CCG019678.1,CCG003938.1,CCG023468.1,CCG025990.1,CCG013641.1,CCG015350.1,CCG003495.1,CCG021948.1,CCG011148.1,CCG020651.1,CCG025131.2,CCG005284.1,CCG004927.1,CCG023452.1,CCG009805.2,CCG002852.1,CCG019545.1,CCG003142.1,CCG021137.1,CCG013610.1,CCG001876.1,CCG012584.1,CCG013465.1,CCG009518.1,CCG024200.1,CCG010624.1,CCG002231.1,CCG023125.1,CCG016381.1,CCG011727.1,CCG026865.1,CCG017001.1,CCG024788.1,CCG007263.1,CCG021767.1,CCG004926.1,CCG001285.1,CCG004907.1,CCG010912.1,CCG004955.1,CCG015367.1,CCG003750.1,CCG005524.1,CCG026047.1,CCG011491.1,CCG024857.1,CCG022772.1,CCG010136.1,CCG005501.1,CCG003310.1,CCG026516.1,CCG024570.2,CCG018164.1,CCG013617.1,CCG004224.1,CCG010112.1,CCG022513.2,CCG028092.1,CCG018650.1,CCG000209.1,CCG016760.1,CCG021521.1,CCG007902.1,CCG023486.1, |
| GO:0006265 | DNA topological change                       | 7 of 4104 in the list   | 10 of 8404 in the genome   | 1 | CCG022918.1,CCG008972.1,CCG027183.2,CCG016201.1,CCG000166.1,CCG011615.1,CCG003438.1                                                                                                                                                                                                                                                                                                                                                                                                                                                                                                                                                                                                                                                                                                                                                                                                                                                                                                                                                                                                                                                                                                                                                                                                                                                                                                                                                                                                              |
| GO:0006479 | protein methylation                          | 7 of 4104 in the list   | 10 of 8404 in the genome   | 1 | CCG025991.2,CCG021449.1,CCG012083.1,CCG001369.2,CCG015398.1,CCG026248.1,CCG025942.1                                                                                                                                                                                                                                                                                                                                                                                                                                                                                                                                                                                                                                                                                                                                                                                                                                                                                                                                                                                                                                                                                                                                                                                                                                                                                                                                                                                                              |
| GO:0008213 | protein alkylation                           | 7 of 4104 in the list   | 10 of 8404 in the genome   | 1 | CCG025991.2,CCG021449.1,CCG012083.1,CCG001369.2,CCG015398.1,CCG026248.1,CCG025942.1                                                                                                                                                                                                                                                                                                                                                                                                                                                                                                                                                                                                                                                                                                                                                                                                                                                                                                                                                                                                                                                                                                                                                                                                                                                                                                                                                                                                              |

|            |                                          |                         |                           |   |                                                                                                                                                                                                                                                                                                                                                                                                                                                                                                                                                                                                                                                                                                                                                                                                                                                                                                                                                                                                                                                                                                                                                                                                                                                                                                                                                                                                                                                                                                  |
|------------|------------------------------------------|-------------------------|---------------------------|---|--------------------------------------------------------------------------------------------------------------------------------------------------------------------------------------------------------------------------------------------------------------------------------------------------------------------------------------------------------------------------------------------------------------------------------------------------------------------------------------------------------------------------------------------------------------------------------------------------------------------------------------------------------------------------------------------------------------------------------------------------------------------------------------------------------------------------------------------------------------------------------------------------------------------------------------------------------------------------------------------------------------------------------------------------------------------------------------------------------------------------------------------------------------------------------------------------------------------------------------------------------------------------------------------------------------------------------------------------------------------------------------------------------------------------------------------------------------------------------------------------|
| GO:0009132 | nucleoside diphosphate metabolic process | 7 of 4104 in the list   | 10 of 8404 in the genome  | 1 | CCG021110.1,CCG006529.1,CCG000217.1,CCG004191.1,CCG017995.1,CCG007417.1,CCG014116.1                                                                                                                                                                                                                                                                                                                                                                                                                                                                                                                                                                                                                                                                                                                                                                                                                                                                                                                                                                                                                                                                                                                                                                                                                                                                                                                                                                                                              |
| GO:0043604 | amide biosynthetic process               | 7 of 4104 in the list   | 10 of 8404 in the genome  | 1 | CCG006821.1,CCG010174.2,CCG009333.1,CCG002897.1,CCG003865.1,CCG026099.1,CCG024133.1                                                                                                                                                                                                                                                                                                                                                                                                                                                                                                                                                                                                                                                                                                                                                                                                                                                                                                                                                                                                                                                                                                                                                                                                                                                                                                                                                                                                              |
| GO:0044711 | single-organism biosynthetic process     | 162 of 4104 in the list | 313 of 8404 in the genome | 1 | CCG010174.2,CCG017331.1,CCG000663.1,CCG025989.2,CCG024517.1,CCG025493.1,CCG026174.1,CCG000016.1,CCG007330.1,CCG017097.1,CCG016220.1,CCG011531.1,CCG001102.1,CCG005923.1,CCG026536.1,CCG009434.1,CCG007993.1,CCG019693.1,CCG012308.1,CCG001423.1,CCG016653.1,CCG007771.1,CCG022025.2,CCG005053.1,CCG025940.1,CCG008860.1,CCG028332.1,CCG010944.1,CCG006965.1,CCG021110.1,CCG024612.1,CCG019909.1,CCG017559.1,CCG015746.1,CCG009244.1,CCG023640.1,CCG012002.1,CCG013131.1,CCG025348.1,CCG019619.1,CCG022352.1,CCG028131.1,CCG016315.1,CCG021610.1,CCG027312.1,CCG010460.1,CCG006821.1,CCG015410.1,CCG003865.1,CCG009142.1,CCG026898.1,CCG012840.1,CCG017278.1,CCG000552.1,CCG023452.1,CCG025636.2,CCG014116.1,CCG017111.1,CCG013610.1,CCG022773.2,CCG023757.1,CCG009518.1,CCG002231.1,CCG015411.1,CCG006791.1,CCG026155.1,CCG026865.1,CCG015567.1,CCG004532.1,CCG026047.1,CCG017175.1,CCG011491.1,CCG006529.1,CCG009333.1,CCG009803.1,CCG004806.1,CCG007533.1,CCG008422.1,CCG010112.1,CCG015568.1,CCG020441.1,CCG013643.1,CCG024155.1,CCG019263.1,CCG022209.1,CCG002038.1,CCG010561.1,CCG028524.1,CCG014839.1,CCG015986.1,CCG022134.1,CCG000148.1,CCG013365.1,CCG025889.1,CCG005924.2,CCG018615.3,CCG024760.1,CCG025731.1,CCG022430.1,CCG018108.1,CCG026099.1,CCG024133.1,CCG004257.1,CCG017330.1,CCG003751.1,CCG025897.1,CCG006009.1,CCG024762.1,CCG021934.1,CCG014379.1,CCG007203.1,CCG027212.1,CCG019954.3,CCG004180.1,CCG017995.1,CCG000331.1,CCG012408.1,CCG015921.1,CCG026370.1,CCG020559.1, |

|            |                                        |                        |                           |   |                                                                                                                                                                                                                                                                                                                                                                                                                                                                                                                                                                                                                                                                                                                                                                                                 |
|------------|----------------------------------------|------------------------|---------------------------|---|-------------------------------------------------------------------------------------------------------------------------------------------------------------------------------------------------------------------------------------------------------------------------------------------------------------------------------------------------------------------------------------------------------------------------------------------------------------------------------------------------------------------------------------------------------------------------------------------------------------------------------------------------------------------------------------------------------------------------------------------------------------------------------------------------|
| GO:0009166 | nucleotide catabolic process           | 67 of 4104 in the list | 125 of 8404 in the genome | 1 | CCG006420.1,CCG017420.1,CCG002549.1,CCG007060.1,CCG013000.1,CCG013766.1,CCG024327.1,CCG015386.1,CCG019020.1,CCG009243.1,CCG002925.1,CCG023005.1,CCG024375.1,CCG009607.1,CCG011006.1,CCG027119.1,CCG007827.1,CCG014434.1,CCG006421.1,CCG023963.3,CCG021990.1,CCG025027.1,CCG016370.1,CCG019103.1,CCG019629.2,CCG006311.1,CCG002917.1,CCG005147.1,CCG004988.1,CCG020909.1,CCG007532.1,CCG007531.1,CCG018447.1,CCG016966.1,CCG018820.3,CCG025179.1,CCG006777.1,CCG025973.1,CCG013637.1,CCG001440.1,CCG010418.1,CCG009080.1,CCG004869.1,CCG025396.1,CCG026953.1,CCG006924.1,CCG021220.1,CCG008748.1,CCG013641.1,CCG016027.1,CCG015289.1,CCG003495.1,CCG021411.1,CCG001859.1,CCG026336.1,CCG005886.1,CCG016542.1,CCG025131.2,CCG015654.1,CCG026154.1,CCG002852.1,CCG010864.1,CCG001445.1,CCG013765.1 |
| GO:1901292 | nucleoside phosphate catabolic process | 67 of 4104 in the list | 125 of 8404 in the genome | 1 | CCG006420.1,CCG017420.1,CCG002549.1,CCG007060.1,CCG013000.1,CCG013766.1,CCG024327.1,CCG015386.1,CCG019020.1,CCG009243.1,CCG002925.1,CCG023005.1,CCG024375.1,CCG009607.1,CCG011006.1,CCG027119.1,CCG007827.1,CCG014434.1,CCG006421.1,CCG023963.3,CCG021990.1,CCG025027.1,CCG016370.1,CCG019103.1,CCG019629.2,CCG006311.1,CCG002917.1,CCG005147.1,CCG004988.1,CCG020909.1,CCG007532.1,CCG007531.1,CCG018447.1,CCG016966.1,CCG018820.3,CCG025179.1,CCG006777.1,CCG025973.1,CCG013637.1,CCG001440.1,CCG010418.1,CCG009080.1,CCG004869.1,CCG025396.1,CCG026953.1,CCG006924.1,CCG021220.1,CCG008748.1,CCG013641.1,CCG016027.1,CCG015289.1,CCG003495.1,CCG021411.1,CCG001859.1,CCG026336.1,CCG005886.1,CCG016542.1,CCG025131.2,CCG015654.1,CCG026154.1,CCG002852.1,CCG010864.1,CCG001445.1,CCG013765.1 |
| GO:0006643 | membrane lipid metabolic process       | 21 of 4104 in the list | 36 of 8404 in the genome  | 1 | CCG025233.1,CCG021085.1,CCG022209.1,CCG017241.1,CCG009434.1,CCG014839.1,CCG013509.1,CCG000663.1,CCG013131.1,CCG026370.1,CCG025889.1,CCG004806.1,CCG000552.1,CCG024760.1,CCG017994.1,CCG028332.1,CCG007330.1,CCG023779.1,CCG019082.1,CCG011531.1,                                                                                                                                                                                                                                                                                                                                                                                                                                                                                                                                                |

|            |                                      |                        |                           |   |                                                                                                                                                                                                                                                                                                                                                                                                                                                                                                                                                                                                                                                                                                                                                                                                                                                                                                  |
|------------|--------------------------------------|------------------------|---------------------------|---|--------------------------------------------------------------------------------------------------------------------------------------------------------------------------------------------------------------------------------------------------------------------------------------------------------------------------------------------------------------------------------------------------------------------------------------------------------------------------------------------------------------------------------------------------------------------------------------------------------------------------------------------------------------------------------------------------------------------------------------------------------------------------------------------------------------------------------------------------------------------------------------------------|
| GO:0009100 | glycoprotein metabolic process       | 21 of 4104 in the list | 36 of 8404 in the genome  | 1 | CCG017381.1,CCG018536.1,CCG023617.1,CCG027131.1,CCG017197.1,CCG013985.1,CCG014579.1,CCG012268.1,CCG007766.1,CCG001602.1,CCG016003.1,CCG009928.1,CCG004091.1,CCG006221.1,CCG019210.1,CCG012164.1,CCG009494.1,CCG003247.1,CCG025472.1,CCG010700.1,                                                                                                                                                                                                                                                                                                                                                                                                                                                                                                                                                                                                                                                 |
| GO:0090407 | organophosphate biosynthetic process | 76 of 4104 in the list | 143 of 8404 in the genome | 1 | CCG004532.1,CCG026047.1,CCG000663.1,CCG006529.1,CCG025989.2,CCG004806.1,CCG007533.1,CCG008422.1,CCG025493.1,CCG000016.1,CCG026174.1,CCG007330.1,CCG010112.1,CCG011531.1,CCG024155.1,CCG013643.1,CCG022209.1,CCG002038.1,CCG009434.1,CCG014839.1,CCG007993.1,CCG012308.1,CCG000148.1,CCG013365.1,CCG016653.1,CCG025889.1,CCG005924.2,CCG024760.1,CCG028332.1,CCG017330.1,CCG010944.1,CCG006965.1,CCG021110.1,CCG016148.1,CCG024612.1,CCG021934.1,CCG010319.1,CCG014379.1,CCG015746.1,CCG017995.1,CCG004180.1,CCG023640.1,CCG013131.1,CCG026370.1,CCG025348.1,CCG019619.1,CCG022352.1,CCG013999.1,CCG028131.1,CCG021336.1,CCG007417.1,CCG024432.2,CCG007724.1,CCG021610.1,CCG023102.1,CCG017295.1,CCG017241.1,CCG015410.1,CCG025107.1,CCG009142.1,CCG026898.1,CCG015747.1,CCG026812.1,CCG000552.1,CCG023452.1,CCG018659.2,CCG014116.1,CCG013610.1,CCG023757.1,CCG016614.1,CCG028305.1,CCG009518.1, |
| GO:0007155 | cell adhesion                        | 51 of 4104 in the list | 94 of 8404 in the genome  | 1 | CCG026424.3,CCG022123.1,CCG007182.1,CCG025334.1,CCG016263.1,CCG023740.2,CCG004279.1,CCG001422.1,CCG000237.1,CCG021360.1,CCG007356.1,CCG008089.1,CCG008253.1,CCG007575.1,CCG002875.1,CCG020013.1,CCG015458.1,CCG004542.1,CCG003587.1,CCG006479.1,CCG011199.1,CCG015596.1,CCG007117.1,CCG024898.1,CCG021854.1,CCG013707.1,CCG016035.1,CCG026389.1,CCG019884.1,CCG028452.1,CCG004753.1,CCG020708.1,CCG008075.1,CCG017729.1,CCG015389.1,CCG008431.1,CCG017851.1,CCG000554.1,CCG028158.1,CCG014318.1,CCG011200.2,CCG008251.1,CCG010990.1,CCG000127.1,CCG012634.1,CCG000526.1,CCG021355.1,CCG016446.1,CCG008800.1,CCG027757.1,CCG013255.1,                                                                                                                                                                                                                                                             |

|            |                                             |                        |                          |   |                                                                                                                                                                                                                                                                                                                                                                                                                                                                                                                                                                                                                                     |
|------------|---------------------------------------------|------------------------|--------------------------|---|-------------------------------------------------------------------------------------------------------------------------------------------------------------------------------------------------------------------------------------------------------------------------------------------------------------------------------------------------------------------------------------------------------------------------------------------------------------------------------------------------------------------------------------------------------------------------------------------------------------------------------------|
| GO:0022610 | biological adhesion                         | 51 of 4104 in the list | 94 of 8404 in the genome | 1 | CCG026424.3,CCG022123.1,CCG007182.1,CCG025334.1,CCG016263.1,CCG023740.2,CCG004279.1,CCG001422.1,CCG000237.1,CCG021360.1,CCG007356.1,CCG008089.1,CCG008253.1,CCG007575.1,CCG002875.1,CCG020013.1,CCG015458.1,CCG004542.1,CCG003587.1,CCG006479.1,CCG011199.1,CCG015596.1,CCG007117.1,CCG024898.1,CCG021854.1,CCG013707.1,CCG016035.1,CCG026389.1,CCG019884.1,CCG028452.1,CCG004753.1,CCG020708.1,CCG008075.1,CCG017729.1,CCG015389.1,CCG008431.1,CCG017851.1,CCG000554.1,CCG028158.1,CCG014318.1,CCG011200.2,CCG008251.1,CCG010990.1,CCG000127.1,CCG012634.1,CCG000526.1,CCG021355.1,CCG016446.1,CCG008800.1,CCG027757.1,CCG013255.1 |
| GO:0006790 | sulfur compound metabolic process           | 14 of 4104 in the list | 23 of 8404 in the genome | 1 | CCG006994.1,CCG002897.1,CCG003865.1,CCG026099.1,CCG004535.1,CCG025465.1,CCG018907.1,CCG016955.1,CCG015568.1,CCG003751.1,CCG027551.3,CCG015567.1,CCG025636.2,CCG010319.1                                                                                                                                                                                                                                                                                                                                                                                                                                                             |
| GO:0006904 | vesicle docking involved in exocytosis      | 8 of 4104 in the list  | 12 of 8404 in the genome | 1 | CCG002121.1,CCG016860.1,CCG016836.2,CCG002937.1,CCG000631.1,CCG005810.1,CCG016493.2,CCG023051.1                                                                                                                                                                                                                                                                                                                                                                                                                                                                                                                                     |
| GO:0032312 | regulation of ARF GTPase activity           | 8 of 4104 in the list  | 12 of 8404 in the genome | 1 | CCG016454.1,CCG021442.1,CCG022083.1,CCG022394.1,CCG019462.1,CCG010260.1,CCG004132.1,CCG025554.1                                                                                                                                                                                                                                                                                                                                                                                                                                                                                                                                     |
| GO:0009081 | branched-chain amino acid metabolic process | 4 of 4104 in the list  | 5 of 8404 in the genome  | 1 | CCG022407.1,CCG025307.1,CCG025439.1,CCG009084.2                                                                                                                                                                                                                                                                                                                                                                                                                                                                                                                                                                                     |
| GO:0016571 | histone methylation                         | 4 of 4104 in the list  | 5 of 8404 in the genome  | 1 | CCG025991.2,CCG012083.1,CCG001369.2,CCG015398.1                                                                                                                                                                                                                                                                                                                                                                                                                                                                                                                                                                                     |
| GO:0034968 | histone lysine methylation                  | 4 of 4104 in the list  | 5 of 8404 in the genome  | 1 | CCG025991.2,CCG012083.1,CCG001369.2,CCG015398.1                                                                                                                                                                                                                                                                                                                                                                                                                                                                                                                                                                                     |
| GO:0046165 | alcohol biosynthetic process                | 4 of 4104 in the list  | 5 of 8404 in the genome  | 1 | CCG024095.1,CCG014174.1,CCG023757.1,CCG016653.1                                                                                                                                                                                                                                                                                                                                                                                                                                                                                                                                                                                     |

|            |                                     |                         |                            |   |                                                                                                                                                                                                                                                                                                                                                                                                                                                                                                                                                                                                                                                                                                                                                                                                                                                                                                                                                                                                                                                                                                                                                                                                                                                                                                                                                                                                                                                                                                  |
|------------|-------------------------------------|-------------------------|----------------------------|---|--------------------------------------------------------------------------------------------------------------------------------------------------------------------------------------------------------------------------------------------------------------------------------------------------------------------------------------------------------------------------------------------------------------------------------------------------------------------------------------------------------------------------------------------------------------------------------------------------------------------------------------------------------------------------------------------------------------------------------------------------------------------------------------------------------------------------------------------------------------------------------------------------------------------------------------------------------------------------------------------------------------------------------------------------------------------------------------------------------------------------------------------------------------------------------------------------------------------------------------------------------------------------------------------------------------------------------------------------------------------------------------------------------------------------------------------------------------------------------------------------|
| GO:0006807 | nitrogen compound metabolic process | 982 of 4104 in the list | 1973 of 8404 in the genome | 1 | CCG017420.1,CCG027300.1,CCG014396.1,CCG006549.1,CCG006912.1,CCG026106.1,CCG006357.1,CCG009878.1,CCG024072.1,CCG012875.1,CCG024517.1,CCG025108.1,CCG026174.1,CCG020685.1,CCG013625.1,CCG004468.1,CCG023989.1,CCG016238.1,CCG024584.1,CCG004020.1,CCG001292.1,CCG016220.1,CCG018321.1,CCG002470.1,CCG005194.1,CCG001040.1,CCG014836.1,CCG020799.1,CCG025208.1,CCG025307.1,CCG019382.1,CCG016370.1,CCG016094.1,CCG027183.2,CCG023474.1,CCG010792.1,CCG004231.1,CCG012623.1,CCG022025.2,CCG005053.1,CCG019371.1,CCG010905.1,CCG011722.1,CCG020471.1,CCG021110.1,CCG003063.1,CCG010909.1,CCG023129.1,CCG018110.1,CCG028653.1,CCG021342.1,CCG016153.1,CCG024326.1,CCG014946.1,CCG020286.1,CCG002735.1,CCG027133.1,CCG021086.2,CCG014280.1,CCG015694.1,CCG013865.1,CCG025396.1,CCG006484.1,CCG026953.1,CCG001461.1,CCG023686.1,CCG004402.1,CCG019678.1,CCG003938.1,CCG023468.1,CCG025990.1,CCG013641.1,CCG006821.1,CCG015350.1,CCG003495.1,CCG021948.1,CCG011148.1,CCG020651.1,CCG025131.2,CCG005284.1,CCG004927.1,CCG023452.1,CCG009805.2,CCG002852.1,CCG019545.1,CCG003142.1,CCG021137.1,CCG013610.1,CCG001876.1,CCG012584.1,CCG013465.1,CCG009518.1,CCG024200.1,CCG010624.1,CCG002231.1,CCG023125.1,CCG016381.1,CCG011727.1,CCG028454.1,CCG020663.1,CCG026865.1,CCG017001.1,CCG024788.1,CCG007263.1,CCG021767.1,CCG008388.1,CCG004926.1,CCG001285.1,CCG004907.1,CCG010912.1,CCG004955.1,CCG015367.1,CCG003750.1,CCG005524.1,CCG026047.1,CCG011491.1,CCG024857.1,CCG022772.1,CCG010136.1,CCG009333.1, |
| GO:0006913 | nucleocytoplasmic transport         | 26 of 4104 in the list  | 46 of 8404 in the genome   | 1 | CCG013641.1,CCG011567.1,CCG017078.1,CCG003495.1,CCG007060.1,CCG001809.1,CCG011696.1,CCG026336.1,CCG019629.2,CCG016542.1,CCG021221.1,CCG004869.1,CCG015386.1,CCG019020.1,CCG022771.1,CCG020909.1,CCG006924.1,CCG021220.1,CCG018447.1,CCG026989.1,CCG008116.1,CCG021152.1,CCG011006.1,CCG017077.1,                                                                                                                                                                                                                                                                                                                                                                                                                                                                                                                                                                                                                                                                                                                                                                                                                                                                                                                                                                                                                                                                                                                                                                                                 |



|            |                                 |                        |                          |   |                                                                                                                                                                                                                                                                                                  |
|------------|---------------------------------|------------------------|--------------------------|---|--------------------------------------------------------------------------------------------------------------------------------------------------------------------------------------------------------------------------------------------------------------------------------------------------|
| GO:0051169 | nuclear transport               | 26 of 4104 in the list | 46 of 8404 in the genome | 1 | CCG013641.1,CCG011567.1,CCG017078.1,CCG003495.1,CCG007060.1,CCG001809.1,CCG011696.1,CCG026336.1,CCG019629.2,CCG016542.1,CCG021221.1,CCG004869.1,CCG015386.1,CCG019020.1,CCG022771.1,CCG020909.1,CCG006924.1,CCG021220.1,CCG018447.1,CCG026989.1,CCG008116.1,CCG021152.1,CCG011006.1,CCG017077.1, |
| GO:0016569 | covalent chromatin modification | 9 of 4104 in the list  | 14 of 8404 in the genome | 1 | CCG012083.1,CCG018326.1,CCG001369.2,CCG006686.1,CCG006211.1,CCG020863.1,CCG025991.2,CCG013028.1,                                                                                                                                                                                                 |
| GO:0016570 | histone modification            | 9 of 4104 in the list  | 14 of 8404 in the genome | 1 | CCG012083.1,CCG018326.1,CCG001369.2,CCG006686.1,CCG006211.1,CCG020863.1,CCG025991.2,CCG013028.1,                                                                                                                                                                                                 |

|            |                   |                         |                           |   |                                                                                                                                                                                                                                                                                                                                                                                                                                                                                                                                                                                                                                                                                                                                                                                                                                                                                                                                                                                                                                                                                                                                                                                                                                                                                                                                                                                                                                                                                                  |
|------------|-------------------|-------------------------|---------------------------|---|--------------------------------------------------------------------------------------------------------------------------------------------------------------------------------------------------------------------------------------------------------------------------------------------------------------------------------------------------------------------------------------------------------------------------------------------------------------------------------------------------------------------------------------------------------------------------------------------------------------------------------------------------------------------------------------------------------------------------------------------------------------------------------------------------------------------------------------------------------------------------------------------------------------------------------------------------------------------------------------------------------------------------------------------------------------------------------------------------------------------------------------------------------------------------------------------------------------------------------------------------------------------------------------------------------------------------------------------------------------------------------------------------------------------------------------------------------------------------------------------------|
| GO:0009056 | catabolic process | 204 of 4104 in the list | 399 of 8404 in the genome | 1 | CCG006420.1,CCG017420.1,CCG002549.1,CCG027068.1,CCG013000.1,CCG013766.1,CCG024327.1,CCG024092.1,CCG015386.1,CCG019020.1,CCG003288.1,CCG025108.1,CCG003220.2,CCG020685.1,CCG022635.1,CCG006203.1,CCG006391.1,CCG004020.1,CCG009685.1,CCG002925.1,CCG019834.1,CCG025387.1,CCG022453.1,CCG023005.1,CCG024375.1,CCG003748.1,CCG009607.1,CCG011006.1,CCG001539.1,CCG027119.1,CCG004448.2,CCG005029.1,CCG012828.1,CCG015610.1,CCG020799.1,CCG025307.1,CCG019113.1,CCG025521.1,CCG016370.1,CCG028595.1,CCG026413.3,CCG006311.1,CCG005441.1,CCG002917.1,CCG023890.1,CCG002974.1,CCG013876.1,CCG002139.1,CCG011722.1,CCG010019.1,CCG025277.1,CCG003063.1,CCG008217.1,CCG003215.3,CCG009424.1,CCG011238.1,CCG002418.1,CCG019571.1,CCG010879.1,CCG020154.1,CCG002366.1,CCG004869.1,CCG009080.1,CCG001877.1,CCG007690.1,CCG004331.1,CCG025396.1,CCG026953.1,CCG008969.2,CCG011721.1,CCG006924.1,CCG021220.1,CCG008510.1,CCG025962.1,CCG013832.1,CCG017543.1,CCG013641.1,CCG015289.1,CCG021411.1,CCG003495.1,CCG001859.1,CCG001769.1,CCG027283.1,CCG022214.1,CCG009582.1,CCG025131.2,CCG021807.1,CCG024829.1,CCG002852.1,CCG011789.1,CCG022742.2,CCG017200.1,CCG023420.1,CCG002231.1,CCG000834.1,CCG027763.1,CCG005177.1,CCG007362.1,CCG021152.1,CCG023526.2,CCG019697.2,CCG011996.1,CCG026612.1,CCG008388.1,CCG003060.1,CCG005588.1,CCG001704.1,CCG007060.1,CCG007080.1,CCG005524.1,CCG001350.1,CCG010373.1,CCG010111.1,CCG019599.1,CCG024974.1,CCG000591.1,CCG009243.1,CCG012628.1,CCG006358.1,CCG016477.1, |
|------------|-------------------|-------------------------|---------------------------|---|--------------------------------------------------------------------------------------------------------------------------------------------------------------------------------------------------------------------------------------------------------------------------------------------------------------------------------------------------------------------------------------------------------------------------------------------------------------------------------------------------------------------------------------------------------------------------------------------------------------------------------------------------------------------------------------------------------------------------------------------------------------------------------------------------------------------------------------------------------------------------------------------------------------------------------------------------------------------------------------------------------------------------------------------------------------------------------------------------------------------------------------------------------------------------------------------------------------------------------------------------------------------------------------------------------------------------------------------------------------------------------------------------------------------------------------------------------------------------------------------------|

|            |                                           |                        |                          |   |                                                                                                                                                                                                                                                                                                                                                                                                                                                                                                                                                                                                 |
|------------|-------------------------------------------|------------------------|--------------------------|---|-------------------------------------------------------------------------------------------------------------------------------------------------------------------------------------------------------------------------------------------------------------------------------------------------------------------------------------------------------------------------------------------------------------------------------------------------------------------------------------------------------------------------------------------------------------------------------------------------|
| GO:0009165 | nucleotide biosynthetic process           | 43 of 4104 in the list | 79 of 8404 in the genome | 1 | CCG014379.1,CCG004180.1,CCG017995.1,CCG023640.1,CCG026047.1,CCG006529.1,CCG025348.1,CCG025989.2,CCG019619.1,CCG008422.1,CCG025493.1,CCG000016.1,CCG026174.1,CCG021336.1,CCG028131.1,CCG013999.1,CCG010112.1,CCG007417.1,CCG007724.1,CCG013643.1,CCG015410.1,CCG002038.1,CCG025107.1,CCG009142.1,CCG026898.1,CCG026812.1,CCG007993.1,CCG000148.1,CCG013365.1,CCG023452.1,CCG005924.2,CCG018659.2,CCG014116.1,CCG013610.1,CCG016614.1,CCG028305.1,CCG009518.1,CCG004188.3,CCG017330.1,CCG010944.1,CCG006791.1,CCG021110.1,CCG026865.1,CCG021934.1                                                 |
| GO:0006164 | purine nucleotide biosynthetic process    | 28 of 4104 in the list | 50 of 8404 in the genome | 1 | CCG015410.1,CCG002038.1,CCG025107.1,CCG009142.1,CCG017995.1,CCG023640.1,CCG026898.1,CCG026812.1,CCG000148.1,CCG006529.1,CCG025348.1,CCG013365.1,CCG025989.2,CCG019619.1,CCG018659.2,CCG005924.2,CCG008422.1,CCG013999.1,CCG021336.1,CCG028305.1,CCG010112.1,CCG007417.1,CCG017330.1,CCG006791.1,CCG021110.1,CCG007724.1,CCG021934.1,CCG013643.1                                                                                                                                                                                                                                                 |
| GO:1901293 | nucleoside phosphate biosynthetic process | 48 of 4104 in the list | 89 of 8404 in the genome | 1 | CCG014379.1,CCG015746.1,CCG004180.1,CCG017995.1,CCG023640.1,CCG026047.1,CCG006529.1,CCG025348.1,CCG025989.2,CCG019619.1,CCG007533.1,CCG008422.1,CCG025493.1,CCG000016.1,CCG026174.1,CCG021336.1,CCG028131.1,CCG013999.1,CCG010112.1,CCG007417.1,CCG007724.1,CCG013643.1,CCG017295.1,CCG015410.1,CCG002038.1,CCG025107.1,CCG009142.1,CCG026898.1,CCG015747.1,CCG026812.1,CCG007993.1,CCG000148.1,CCG013365.1,CCG023452.1,CCG005924.2,CCG018659.2,CCG014116.1,CCG013610.1,CCG016614.1,CCG028305.1,CCG009518.1,CCG004188.3,CCG017330.1,CCG010944.1,CCG006791.1,CCG021110.1,CCG026865.1,CCG021934.1 |

|            |                                           |                        |                           |   |                                                                                                                                                                                                                                                                                                                                                                                                                                                                                                                                                                                                                                                                                                                                                                                                                                                                                                                                                                                                                                                  |
|------------|-------------------------------------------|------------------------|---------------------------|---|--------------------------------------------------------------------------------------------------------------------------------------------------------------------------------------------------------------------------------------------------------------------------------------------------------------------------------------------------------------------------------------------------------------------------------------------------------------------------------------------------------------------------------------------------------------------------------------------------------------------------------------------------------------------------------------------------------------------------------------------------------------------------------------------------------------------------------------------------------------------------------------------------------------------------------------------------------------------------------------------------------------------------------------------------|
| GO:1901565 | organonitrogen compound catabolic process | 90 of 4104 in the list | 172 of 8404 in the genome | 1 | CCG006420.1,CCG017420.1,CCG002549.1,CCG007060.1,CCG013000.1,CCG010111.1,CCG024327.1,CCG015386.1,CCG019020.1,CCG009243.1,CCG025108.1,CCG004020.1,CCG016477.1,CCG019834.1,CCG009607.1,CCG011006.1,CCG012048.1,CCG007827.1,CCG014434.1,CCG006421.1,CCG023963.3,CCG005029.1,CCG015610.1,CCG020799.1,CCG025027.1,CCG016370.1,CCG020793.1,CCG019103.1,CCG019629.2,CCG002917.1,CCG023890.1,CCG001082.1,CCG020909.1,CCG007532.1,CCG018447.1,CCG007531.1,CCG016966.1,CCG018820.3,CCG011722.1,CCG010019.1,CCG025179.1,CCG003063.1,CCG006777.1,CCG007203.1,CCG025973.1,CCG013637.1,CCG009424.1,CCG002418.1,CCG010418.1,CCG009080.1,CCG004869.1,CCG020154.1,CCG021117.1,CCG025396.1,CCG026953.1,CCG011721.1,CCG006924.1,CCG021220.1,CCG008510.1,CCG025962.1,CCG008748.1,CCG006059.1,CCG017543.1,CCG013641.1,CCG019243.1,CCG016027.1,CCG015289.1,CCG019470.1,CCG003495.1,CCG021411.1,CCG015907.1,CCG001859.1,CCG026336.1,CCG005886.1,CCG025131.2,CCG016542.1,CCG024829.1,CCG028235.1,CCG015654.1,CCG026154.1,CCG002852.1,CCG010864.1,CCG011789.1,CCG002417.1, |
|------------|-------------------------------------------|------------------------|---------------------------|---|--------------------------------------------------------------------------------------------------------------------------------------------------------------------------------------------------------------------------------------------------------------------------------------------------------------------------------------------------------------------------------------------------------------------------------------------------------------------------------------------------------------------------------------------------------------------------------------------------------------------------------------------------------------------------------------------------------------------------------------------------------------------------------------------------------------------------------------------------------------------------------------------------------------------------------------------------------------------------------------------------------------------------------------------------|

|            |                                              |                         |                            |   |                                                                                                                                                                                                                                                                                                                                                                                                                                                                                                                                                                                                                                                                                                                                                                                                                                                                                                                                                                                                                                                                                                                                                                                                                                                                                                                                                                                                                                                                                                  |
|------------|----------------------------------------------|-------------------------|----------------------------|---|--------------------------------------------------------------------------------------------------------------------------------------------------------------------------------------------------------------------------------------------------------------------------------------------------------------------------------------------------------------------------------------------------------------------------------------------------------------------------------------------------------------------------------------------------------------------------------------------------------------------------------------------------------------------------------------------------------------------------------------------------------------------------------------------------------------------------------------------------------------------------------------------------------------------------------------------------------------------------------------------------------------------------------------------------------------------------------------------------------------------------------------------------------------------------------------------------------------------------------------------------------------------------------------------------------------------------------------------------------------------------------------------------------------------------------------------------------------------------------------------------|
| GO:0006725 | cellular aromatic compound metabolic process | 824 of 4104 in the list | 1655 of 8404 in the genome | 1 | CCG017420.1,CCG027300.1,CCG014396.1,CCG006549.1,CCG026106.1,CCG006357.1,CCG009878.1,CCG024072.1,CCG026174.1,CCG020685.1,CCG013625.1,CCG004468.1,CCG023989.1,CCG016238.1,CCG024584.1,CCG001292.1,CCG018321.1,CCG002470.1,CCG005194.1,CCG001040.1,CCG014836.1,CCG025208.1,CCG025307.1,CCG019382.1,CCG016370.1,CCG016094.1,CCG027183.2,CCG023474.1,CCG010792.1,CCG004231.1,CCG012623.1,CCG005053.1,CCG010905.1,CCG011722.1,CCG020471.1,CCG021110.1,CCG010909.1,CCG023129.1,CCG028653.1,CCG021342.1,CCG024326.1,CCG014946.1,CCG020286.1,CCG002735.1,CCG027133.1,CCG021086.2,CCG014280.1,CCG015694.1,CCG013865.1,CCG025396.1,CCG006484.1,CCG026953.1,CCG001461.1,CCG023686.1,CCG004402.1,CCG019678.1,CCG003938.1,CCG023468.1,CCG025990.1,CCG013641.1,CCG015350.1,CCG003495.1,CCG021948.1,CCG011148.1,CCG020651.1,CCG025131.2,CCG005284.1,CCG004927.1,CCG023452.1,CCG009805.2,CCG002852.1,CCG019545.1,CCG003142.1,CCG021137.1,CCG013610.1,CCG001876.1,CCG012584.1,CCG013465.1,CCG009518.1,CCG024200.1,CCG010624.1,CCG023125.1,CCG016381.1,CCG011727.1,CCG026865.1,CCG017001.1,CCG024788.1,CCG007263.1,CCG021767.1,CCG004926.1,CCG001285.1,CCG004907.1,CCG010912.1,CCG004955.1,CCG015367.1,CCG003750.1,CCG005524.1,CCG026047.1,CCG011491.1,CCG024857.1,CCG022772.1,CCG010136.1,CCG005501.1,CCG003310.1,CCG026516.1,CCG024570.2,CCG018164.1,CCG013617.1,CCG004224.1,CCG010112.1,CCG022513.2,CCG028092.1,CCG018650.1,CCG000209.1,CCG016760.1,CCG021521.1,CCG007902.1,CCG023486.1,CCG024232.1,CCG006133.1, |
|------------|----------------------------------------------|-------------------------|----------------------------|---|--------------------------------------------------------------------------------------------------------------------------------------------------------------------------------------------------------------------------------------------------------------------------------------------------------------------------------------------------------------------------------------------------------------------------------------------------------------------------------------------------------------------------------------------------------------------------------------------------------------------------------------------------------------------------------------------------------------------------------------------------------------------------------------------------------------------------------------------------------------------------------------------------------------------------------------------------------------------------------------------------------------------------------------------------------------------------------------------------------------------------------------------------------------------------------------------------------------------------------------------------------------------------------------------------------------------------------------------------------------------------------------------------------------------------------------------------------------------------------------------------|

|            |                               |                         |                            |   |                                                                                                                                                                                                                                                                                                                                                                                                                                                                                                                                                                                                                                                                                                                                                                                                                                                                                                                                                                                                                                                                                                                                                                                                                                                                                                                                                                                                                                                                                                  |
|------------|-------------------------------|-------------------------|----------------------------|---|--------------------------------------------------------------------------------------------------------------------------------------------------------------------------------------------------------------------------------------------------------------------------------------------------------------------------------------------------------------------------------------------------------------------------------------------------------------------------------------------------------------------------------------------------------------------------------------------------------------------------------------------------------------------------------------------------------------------------------------------------------------------------------------------------------------------------------------------------------------------------------------------------------------------------------------------------------------------------------------------------------------------------------------------------------------------------------------------------------------------------------------------------------------------------------------------------------------------------------------------------------------------------------------------------------------------------------------------------------------------------------------------------------------------------------------------------------------------------------------------------|
| GO:0046483 | heterocycle metabolic process | 821 of 4104 in the list | 1649 of 8404 in the genome | 1 | CCG017420.1,CCG027300.1,CCG014396.1,CCG006549.1,CCG026106.1,CCG006357.1,CCG009878.1,CCG024072.1,CCG026174.1,CCG020685.1,CCG013625.1,CCG004468.1,CCG023989.1,CCG016238.1,CCG024584.1,CCG001292.1,CCG016220.1,CCG018321.1,CCG002470.1,CCG005194.1,CCG001040.1,CCG014836.1,CCG025208.1,CCG025307.1,CCG019382.1,CCG016370.1,CCG016094.1,CCG027183.2,CCG023474.1,CCG010792.1,CCG004231.1,CCG012623.1,CCG005053.1,CCG010905.1,CCG020471.1,CCG021110.1,CCG010909.1,CCG023129.1,CCG028653.1,CCG021342.1,CCG024326.1,CCG014946.1,CCG020286.1,CCG002735.1,CCG027133.1,CCG021086.2,CCG014280.1,CCG015694.1,CCG013865.1,CCG025396.1,CCG006484.1,CCG026953.1,CCG001461.1,CCG023686.1,CCG004402.1,CCG019678.1,CCG003938.1,CCG023468.1,CCG025990.1,CCG013641.1,CCG015350.1,CCG003495.1,CCG021948.1,CCG011148.1,CCG020651.1,CCG025131.2,CCG005284.1,CCG004927.1,CCG023452.1,CCG009805.2,CCG002852.1,CCG019545.1,CCG003142.1,CCG021137.1,CCG013610.1,CCG001876.1,CCG012584.1,CCG013465.1,CCG009518.1,CCG024200.1,CCG010624.1,CCG002231.1,CCG023125.1,CCG016381.1,CCG011727.1,CCG026865.1,CCG017001.1,CCG024788.1,CCG007263.1,CCG021767.1,CCG004926.1,CCG001285.1,CCG004907.1,CCG010912.1,CCG004955.1,CCG015367.1,CCG003750.1,CCG005524.1,CCG026047.1,CCG011491.1,CCG024857.1,CCG022772.1,CCG010136.1,CCG005501.1,CCG003310.1,CCG026516.1,CCG024570.2,CCG018164.1,CCG013617.1,CCG004224.1,CCG010112.1,CCG022513.2,CCG028092.1,CCG018650.1,CCG000209.1,CCG016760.1,CCG021521.1,CCG007902.1,CCG023486.1,CCG024232.1, |
| GO:0006486 | protein glycosylation         | 20 of 4104 in the list  | 35 of 8404 in the genome   | 1 | CCG017381.1,CCG018536.1,CCG023617.1,CCG027131.1,CCG017197.1,CCG013985.1,CCG014579.1,CCG012268.1,CCG007766.1,CCG001602.1,CCG016003.1,CCG009928.1,CCG004091.1,CCG006221.1,CCG019210.1,CCG009494.1,CCG003247.1,CCG025472.1,CCG010700.1,CCG018432.1                                                                                                                                                                                                                                                                                                                                                                                                                                                                                                                                                                                                                                                                                                                                                                                                                                                                                                                                                                                                                                                                                                                                                                                                                                                  |

|            |                                                        |                        |                          |   |                                                                                                                                                                                                                                                 |
|------------|--------------------------------------------------------|------------------------|--------------------------|---|-------------------------------------------------------------------------------------------------------------------------------------------------------------------------------------------------------------------------------------------------|
| GO:0009101 | glycoprotein biosynthetic process                      | 20 of 4104 in the list | 35 of 8404 in the genome | 1 | CCG017381.1,CCG018536.1,CCG023617.1,CCG027131.1,CCG017197.1,CCG013985.1,CCG014579.1,CCG012268.1,CCG007766.1,CCG001602.1,CCG016003.1,CCG009928.1,CCG004091.1,CCG006221.1,CCG019210.1,CCG009494.1,CCG003247.1,CCG025472.1,CCG010700.1,CCG018432.1 |
| GO:0043413 | macromolecule glycosylation                            | 20 of 4104 in the list | 35 of 8404 in the genome | 1 | CCG017381.1,CCG018536.1,CCG023617.1,CCG027131.1,CCG017197.1,CCG013985.1,CCG014579.1,CCG012268.1,CCG007766.1,CCG001602.1,CCG016003.1,CCG009928.1,CCG004091.1,CCG006221.1,CCG019210.1,CCG009494.1,CCG003247.1,CCG025472.1,CCG010700.1,CCG018432.1 |
| GO:0005984 | disaccharide metabolic process                         | 5 of 4104 in the list  | 7 of 8404 in the genome  | 1 | CCG019693.1,CCG014260.1,CCG019825.2,CCG024762.1,CCG013129.1                                                                                                                                                                                     |
| GO:0005991 | trehalose metabolic process                            | 5 of 4104 in the list  | 7 of 8404 in the genome  | 1 | CCG019693.1,CCG014260.1,CCG019825.2,CCG024762.1,CCG013129.1                                                                                                                                                                                     |
| GO:0007050 | cell cycle arrest                                      | 5 of 4104 in the list  | 7 of 8404 in the genome  | 1 | CCG008308.1,CCG006063.1,CCG025057.1,CCG001795.1,CCG001794.1                                                                                                                                                                                     |
| GO:0009891 | positive regulation of biosynthetic process            | 5 of 4104 in the list  | 7 of 8404 in the genome  | 1 | CCG018164.1,CCG026216.1,CCG021944.1,CCG026155.1,CCG027118.1                                                                                                                                                                                     |
| GO:0010557 | positive regulation of macromolecule biosynthetic      | 5 of 4104 in the list  | 7 of 8404 in the genome  | 1 | CCG018164.1,CCG026216.1,CCG021944.1,CCG026155.1,CCG027118.1                                                                                                                                                                                     |
| GO:0010604 | positive regulation of macromolecule metabolic process | 5 of 4104 in the list  | 7 of 8404 in the genome  | 1 | CCG018164.1,CCG026216.1,CCG021944.1,CCG026155.1,CCG027118.1                                                                                                                                                                                     |
| GO:0031328 | positive regulation of cellular biosynthetic process   | 5 of 4104 in the list  | 7 of 8404 in the genome  | 1 | CCG018164.1,CCG026216.1,CCG021944.1,CCG026155.1,CCG027118.1                                                                                                                                                                                     |
| GO:0032879 | regulation of localization                             | 5 of 4104 in the list  | 7 of 8404 in the genome  | 1 | CCG026240.1,CCG001279.1,CCG013013.1,CCG015389.1,CCG008431.1                                                                                                                                                                                     |
| GO:0045786 | negative regulation of cell cycle                      | 5 of 4104 in the list  | 7 of 8404 in the genome  | 1 | CCG008308.1,CCG006063.1,CCG025057.1,CCG001795.1,CCG001794.1                                                                                                                                                                                     |
| GO:0006066 | alcohol metabolic process                              | 11 of 4104 in the list | 18 of 8404 in the genome | 1 | CCG012875.1,CCG024095.1,CCG006358.1,CCG023757.1,CCG015949.1,CCG013318.1,CCG005177.1,CCG014174.1,CCG016653.1,CCG008317.1,CCG015587.1                                                                                                             |

|            |                                         |                        |                           |   |                                                                                                                                                                                                                                                                                                                                                                                                                                                                                                                                                                                                                                                                                                                                                                                                                                                                                                                                                                                                                                                                                                  |
|------------|-----------------------------------------|------------------------|---------------------------|---|--------------------------------------------------------------------------------------------------------------------------------------------------------------------------------------------------------------------------------------------------------------------------------------------------------------------------------------------------------------------------------------------------------------------------------------------------------------------------------------------------------------------------------------------------------------------------------------------------------------------------------------------------------------------------------------------------------------------------------------------------------------------------------------------------------------------------------------------------------------------------------------------------------------------------------------------------------------------------------------------------------------------------------------------------------------------------------------------------|
| GO:0070085 | glycosylation                           | 21 of 4104 in the list | 37 of 8404 in the genome  | 1 | CCG017381.1,CCG018536.1,CCG023617.1,CCG027131.1,CCG017197.1,CCG013985.1,CCG014579.1,CCG012268.1,CCG007766.1,CCG001602.1,CCG006213.1,CCG016003.1,CCG009928.1,CCG004091.1,CCG006221.1,CCG019210.1,CCG009494.1,CCG003247.1,CCG025472.1,CCG010700.1,                                                                                                                                                                                                                                                                                                                                                                                                                                                                                                                                                                                                                                                                                                                                                                                                                                                 |
| GO:0030029 | actin filament-based process            | 12 of 4104 in the list | 20 of 8404 in the genome  | 1 | CCG000469.1,CCG009090.1,CCG018647.1,CCG005579.1,CCG009641.1,CCG014817.2,CCG021366.1,CCG016992.2,CCG024028.1,CCG019356.1,CCG008834.1,CCG018646.1                                                                                                                                                                                                                                                                                                                                                                                                                                                                                                                                                                                                                                                                                                                                                                                                                                                                                                                                                  |
| GO:0030036 | actin cytoskeleton organization         | 12 of 4104 in the list | 20 of 8404 in the genome  | 1 | CCG000469.1,CCG009090.1,CCG018647.1,CCG005579.1,CCG009641.1,CCG014817.2,CCG021366.1,CCG016992.2,CCG024028.1,CCG019356.1,CCG008834.1,CCG018646.1                                                                                                                                                                                                                                                                                                                                                                                                                                                                                                                                                                                                                                                                                                                                                                                                                                                                                                                                                  |
| GO:0006163 | purine nucleotide metabolic process     | 91 of 4104 in the list | 175 of 8404 in the genome | 1 | CCG006420.1,CCG017420.1,CCG002549.1,CCG017693.1,CCG007060.1,CCG013000.1,CCG004309.1,CCG006529.1,CCG025989.2,CCG024327.1,CCG015386.1,CCG019020.1,CCG009243.1,CCG008422.1,CCG010112.1,CCG009607.1,CCG011006.1,CCG007827.1,CCG014434.1,CCG013643.1,CCG006421.1,CCG023963.3,CCG002038.1,CCG025027.1,CCG016370.1,CCG000148.1,CCG019103.1,CCG013365.1,CCG019629.2,CCG002917.1,CCG006486.1,CCG005924.2,CCG020909.1,CCG007532.1,CCG017330.1,CCG007531.1,CCG018447.1,CCG016966.1,CCG018820.3,CCG021110.1,CCG025179.1,CCG021934.1,CCG006777.1,CCG004308.1,CCG025973.1,CCG017995.1,CCG013637.1,CCG023640.1,CCG026314.1,CCG010418.1,CCG025348.1,CCG009080.1,CCG004869.1,CCG019619.1,CCG025396.1,CCG013999.1,CCG026953.1,CCG021336.1,CCG006924.1,CCG007417.1,CCG021220.1,CCG001066.1,CCG019866.1,CCG019678.1,CCG007724.1,CCG008748.1,CCG013641.1,CCG015410.1,CCG016027.1,CCG015289.1,CCG025107.1,CCG003495.1,CCG021411.1,CCG009142.1,CCG026898.1,CCG001859.1,CCG026812.1,CCG026336.1,CCG005886.1,CCG025131.2,CCG016542.1,CCG026154.1,CCG015654.1,CCG018659.2,CCG002852.1,CCG010864.1,CCG028305.1,CCG006791.1, |
| GO:0006213 | pyrimidine nucleoside metabolic process | 6 of 4104 in the list  | 9 of 8404 in the genome   | 1 | CCG021110.1,CCG013610.1,CCG006529.1,CCG016614.1,CCG017995.1,CCG007417.1                                                                                                                                                                                                                                                                                                                                                                                                                                                                                                                                                                                                                                                                                                                                                                                                                                                                                                                                                                                                                          |



|            |                                                    |                       |                         |   |                                                                         |
|------------|----------------------------------------------------|-----------------------|-------------------------|---|-------------------------------------------------------------------------|
| GO:0006563 | L-serine metabolic process                         | 6 of 4104 in the list | 9 of 8404 in the genome | 1 | CCG015568.1,CCG019954.3,CCG022025.2,CCG015567.1,CCG025636.2,CCG017201.1 |
| GO:0006835 | dicarboxylic acid transport                        | 6 of 4104 in the list | 9 of 8404 in the genome | 1 | CCG024382.1,CCG027758.1,CCG013708.1,CCG024383.1,CCG026707.1,CCG016959.1 |
| GO:0009218 | pyrimidine ribonucleotide metabolic process        | 6 of 4104 in the list | 9 of 8404 in the genome | 1 | CCG021110.1,CCG013610.1,CCG006529.1,CCG016614.1,CCG017995.1,CCG007417.1 |
| GO:0009220 | pyrimidine ribonucleotide biosynthetic process     | 6 of 4104 in the list | 9 of 8404 in the genome | 1 | CCG021110.1,CCG013610.1,CCG006529.1,CCG016614.1,CCG017995.1,CCG007417.1 |
| GO:0046131 | pyrimidine ribonucleoside metabolic process        | 6 of 4104 in the list | 9 of 8404 in the genome | 1 | CCG021110.1,CCG013610.1,CCG006529.1,CCG016614.1,CCG017995.1,CCG007417.1 |
| GO:0046132 | pyrimidine ribonucleoside biosynthetic process     | 6 of 4104 in the list | 9 of 8404 in the genome | 1 | CCG021110.1,CCG013610.1,CCG006529.1,CCG016614.1,CCG017995.1,CCG007417.1 |
| GO:0046134 | pyrimidine nucleoside biosynthetic process         | 6 of 4104 in the list | 9 of 8404 in the genome | 1 | CCG021110.1,CCG013610.1,CCG006529.1,CCG016614.1,CCG017995.1,CCG007417.1 |
| GO:1901070 | guanosine-containing compound biosynthetic process | 6 of 4104 in the list | 9 of 8404 in the genome | 1 | CCG006791.1,CCG021110.1,CCG006529.1,CCG017995.1,CCG007417.1,CCG018659.2 |

|            |                                     |                         |                           |   |                                                                                                                                                                                                                                                                                                                                                                                                                                                                                                                                                                                                                                                                                                                                                                                                                                                                                                                                                                                                                                                                                                                                                                                                                                                                                                                                                                                                                                                                                                  |
|------------|-------------------------------------|-------------------------|---------------------------|---|--------------------------------------------------------------------------------------------------------------------------------------------------------------------------------------------------------------------------------------------------------------------------------------------------------------------------------------------------------------------------------------------------------------------------------------------------------------------------------------------------------------------------------------------------------------------------------------------------------------------------------------------------------------------------------------------------------------------------------------------------------------------------------------------------------------------------------------------------------------------------------------------------------------------------------------------------------------------------------------------------------------------------------------------------------------------------------------------------------------------------------------------------------------------------------------------------------------------------------------------------------------------------------------------------------------------------------------------------------------------------------------------------------------------------------------------------------------------------------------------------|
| GO:1901575 | organic substance catabolic process | 193 of 4104 in the list | 380 of 8404 in the genome | 1 | CCG006420.1,CCG017420.1,CCG002549.1,CCG027068.1,CCG013000.1,CCG013766.1,CCG024327.1,CCG024092.1,CCG015386.1,CCG019020.1,CCG003288.1,CCG025108.1,CCG003220.2,CCG020685.1,CCG022635.1,CCG006203.1,CCG006391.1,CCG004020.1,CCG009685.1,CCG002925.1,CCG019834.1,CCG025387.1,CCG022453.1,CCG023005.1,CCG024375.1,CCG003748.1,CCG009607.1,CCG011006.1,CCG027119.1,CCG004448.2,CCG005029.1,CCG012828.1,CCG015610.1,CCG020799.1,CCG025307.1,CCG025521.1,CCG016370.1,CCG028595.1,CCG026413.3,CCG006311.1,CCG005441.1,CCG002917.1,CCG023890.1,CCG002974.1,CCG013876.1,CCG011722.1,CCG010019.1,CCG025277.1,CCG003063.1,CCG008217.1,CCG003215.3,CCG009424.1,CCG011238.1,CCG002418.1,CCG019571.1,CCG010879.1,CCG020154.1,CCG004869.1,CCG009080.1,CCG001877.1,CCG007690.1,CCG004331.1,CCG025396.1,CCG026953.1,CCG008969.2,CCG011721.1,CCG006924.1,CCG021220.1,CCG008510.1,CCG025962.1,CCG013832.1,CCG017543.1,CCG013641.1,CCG015289.1,CCG021411.1,CCG003495.1,CCG001859.1,CCG001769.1,CCG027283.1,CCG022214.1,CCG009582.1,CCG025131.2,CCG024829.1,CCG002852.1,CCG011789.1,CCG022742.2,CCG017200.1,CCG023420.1,CCG002231.1,CCG027763.1,CCG005177.1,CCG007362.1,CCG021152.1,CCG023526.2,CCG019697.2,CCG011996.1,CCG026612.1,CCG008388.1,CCG003060.1,CCG005588.1,CCG001704.1,CCG007060.1,CCG007080.1,CCG005524.1,CCG001350.1,CCG010373.1,CCG010111.1,CCG019599.1,CCG000591.1,CCG009243.1,CCG012628.1,CCG006358.1,CCG016477.1,CCG012048.1,CCG007827.1,CCG023963.3,CCG006421.1,CCG014434.1,CCG022035.1,CCG021990.1, |
| GO:0006032 | chitin catabolic process            | 14 of 4104 in the list  | 24 of 8404 in the genome  | 1 | CCG021117.1,CCG015610.1,CCG002417.1,CCG023420.1,CCG004020.1,CCG016477.1,CCG002418.1,CCG025962.1,CCG020793.1,CCG010019.1,CCG012048.1,CCG011996.1,CCG024829.1,CCG023890.1                                                                                                                                                                                                                                                                                                                                                                                                                                                                                                                                                                                                                                                                                                                                                                                                                                                                                                                                                                                                                                                                                                                                                                                                                                                                                                                          |

|            |                                                                      |                        |                          |   |                                                                                                                                                                                                                                                                                                                                                  |
|------------|----------------------------------------------------------------------|------------------------|--------------------------|---|--------------------------------------------------------------------------------------------------------------------------------------------------------------------------------------------------------------------------------------------------------------------------------------------------------------------------------------------------|
| GO:0046348 | amino sugar catabolic process                                        | 14 of 4104 in the list | 24 of 8404 in the genome | 1 | CCG021117.1,CCG015610.1,CCG002417.1,CCG023420.1,CCG004020.1,CCG016477.1,CCG002418.1,CCG025962.1,CCG020793.1,CCG010019.1,CCG012048.1,CCG011996.1,CCG024829.1,CCG023890.1                                                                                                                                                                          |
| GO:1901072 | glucosamine-containing compound catabolic process                    | 14 of 4104 in the list | 24 of 8404 in the genome | 1 | CCG021117.1,CCG015610.1,CCG002417.1,CCG023420.1,CCG004020.1,CCG016477.1,CCG002418.1,CCG025962.1,CCG020793.1,CCG010019.1,CCG012048.1,CCG011996.1,CCG024829.1,CCG023890.1                                                                                                                                                                          |
| GO:0006820 | anion transport                                                      | 29 of 4104 in the list | 53 of 8404 in the genome | 1 | CCG024382.1,CCG017477.1,CCG004637.1,CCG006348.1,CCG012061.1,CCG027185.1,CCG001279.1,CCG006770.1,CCG023190.1,CCG016959.1,CCG023244.1,CCG026667.1,CCG024222.1,CCG027758.1,CCG005768.1,CCG026707.1,CCG024383.1,CCG005769.1,CCG018073.1,CCG020840.1,CCG008734.1,CCG019407.1,CCG026240.1,CCG013013.1,CCG028221.1,CCG013708.1,CCG010965.1,CCG023191.1, |
| GO:0000012 | single strand break repair                                           | 2 of 4104 in the list  | 2 of 8404 in the genome  | 1 | CCG012803.2,CCG024570.2                                                                                                                                                                                                                                                                                                                          |
| GO:0000045 | autophagic vacuole assembly                                          | 2 of 4104 in the list  | 2 of 8404 in the genome  | 1 | CCG002366.1,CCG000834.1                                                                                                                                                                                                                                                                                                                          |
| GO:0000087 | mitotic M phase                                                      | 2 of 4104 in the list  | 2 of 8404 in the genome  | 1 | CCG015077.1,CCG000839.1                                                                                                                                                                                                                                                                                                                          |
| GO:0000122 | negative regulation of transcription from RNA polymerase II promoter | 2 of 4104 in the list  | 2 of 8404 in the genome  | 1 | CCG010489.1,CCG014461.1                                                                                                                                                                                                                                                                                                                          |
| GO:0000279 | M phase                                                              | 2 of 4104 in the list  | 2 of 8404 in the genome  | 1 | CCG015077.1,CCG000839.1                                                                                                                                                                                                                                                                                                                          |
| GO:0000724 | double-strand break repair via homologous recombination              | 2 of 4104 in the list  | 2 of 8404 in the genome  | 1 | CCG017444.1,CCG009962.1                                                                                                                                                                                                                                                                                                                          |
| GO:0000725 | recombinational repair                                               | 2 of 4104 in the list  | 2 of 8404 in the genome  | 1 | CCG017444.1,CCG009962.1                                                                                                                                                                                                                                                                                                                          |
| GO:0000902 | cell morphogenesis                                                   | 2 of 4104 in the list  | 2 of 8404 in the genome  | 1 | CCG015767.2,CCG006750.1                                                                                                                                                                                                                                                                                                                          |
| GO:0000910 | cytokinesis                                                          | 2 of 4104 in the list  | 2 of 8404 in the genome  | 1 | CCG016878.1,CCG024595.1                                                                                                                                                                                                                                                                                                                          |
| GO:0001682 | tRNA 5'-leader removal                                               | 2 of 4104 in the list  | 2 of 8404 in the genome  | 1 | CCG004228.1,CCG023129.1                                                                                                                                                                                                                                                                                                                          |
| GO:0002526 | acute inflammatory response                                          | 2 of 4104 in the list  | 2 of 8404 in the genome  | 1 | CCG024173.1,CCG005170.1                                                                                                                                                                                                                                                                                                                          |
| GO:0006044 | N-acetylglucosamine metabolic process                                | 2 of 4104 in the list  | 2 of 8404 in the genome  | 1 | CCG025948.4,CCG020504.1                                                                                                                                                                                                                                                                                                                          |
| GO:0006084 | acetyl-CoA metabolic process                                         | 2 of 4104 in the list  | 2 of 8404 in the genome  | 1 | CCG018113.1,CCG013216.1                                                                                                                                                                                                                                                                                                                          |
| GO:0006120 | mitochondrial electron transport, NADH to ubiquinone                 | 2 of 4104 in the list  | 2 of 8404 in the genome  | 1 | CCG006459.1,CCG025163.3                                                                                                                                                                                                                                                                                                                          |
| GO:0006189 | 'de novo' IMP biosynthetic process                                   | 2 of 4104 in the list  | 2 of 8404 in the genome  | 1 | CCG028305.1,CCG017330.1                                                                                                                                                                                                                                                                                                                          |
| GO:0006266 | DNA ligation                                                         | 2 of 4104 in the list  | 2 of 8404 in the genome  | 1 | CCG021045.1,CCG006919.1                                                                                                                                                                                                                                                                                                                          |

|            |                                                               |                       |                         |   |                         |
|------------|---------------------------------------------------------------|-----------------------|-------------------------|---|-------------------------|
| GO:0006284 | base-excision repair                                          | 2 of 4104 in the list | 2 of 8404 in the genome | 1 | CCG024792.1,CCG015980.1 |
| GO:0006304 | DNA modification                                              | 2 of 4104 in the list | 2 of 8404 in the genome | 1 | CCG002946.1,CCG022674.1 |
| GO:0006305 | DNA alkylation                                                | 2 of 4104 in the list | 2 of 8404 in the genome | 1 | CCG002946.1,CCG022674.1 |
| GO:0006306 | DNA methylation                                               | 2 of 4104 in the list | 2 of 8404 in the genome | 1 | CCG002946.1,CCG022674.1 |
| GO:0006379 | mRNA cleavage                                                 | 2 of 4104 in the list | 2 of 8404 in the genome | 1 | CCG023511.1,CCG007636.1 |
| GO:0006383 | transcription from RNA polymerase III promoter                | 2 of 4104 in the list | 2 of 8404 in the genome | 1 | CCG006484.1,CCG017046.2 |
| GO:0006438 | valyl-tRNA aminoacylation                                     | 2 of 4104 in the list | 2 of 8404 in the genome | 1 | CCG006188.1,CCG016238.1 |
| GO:0006448 | regulation of translational                                   | 2 of 4104 in the list | 2 of 8404 in the genome | 1 | CCG006714.1,CCG026155.1 |
| GO:0006493 | protein O-linked glycosylation                                | 2 of 4104 in the list | 2 of 8404 in the genome | 1 | CCG007766.1,CCG003247.1 |
| GO:0006498 | N-terminal protein lipidation                                 | 2 of 4104 in the list | 2 of 8404 in the genome | 1 | CCG022255.1,CCG025177.1 |
| GO:0006499 | N-terminal protein myristoylation                             | 2 of 4104 in the list | 2 of 8404 in the genome | 1 | CCG022255.1,CCG025177.1 |
| GO:0006562 | proline catabolic process                                     | 2 of 4104 in the list | 2 of 8404 in the genome | 1 | CCG007203.1,CCG002231.1 |
| GO:0006577 | amino-acid betaine metabolic                                  | 2 of 4104 in the list | 2 of 8404 in the genome | 1 | CCG020559.1,CCG026331.1 |
| GO:0006578 | amino-acid betaine biosynthetic process                       | 2 of 4104 in the list | 2 of 8404 in the genome | 1 | CCG020559.1,CCG026331.1 |
| GO:0006672 | ceramide metabolic process                                    | 2 of 4104 in the list | 2 of 8404 in the genome | 1 | CCG021085.1,CCG023779.1 |
| GO:0006874 | cellular calcium ion homeostasis                              | 2 of 4104 in the list | 2 of 8404 in the genome | 1 | CCG026796.1,CCG020400.2 |
| GO:0006906 | vesicle fusion                                                | 2 of 4104 in the list | 2 of 8404 in the genome | 1 | CCG020315.1,CCG026620.1 |
| GO:0006953 | acute-phase response                                          | 2 of 4104 in the list | 2 of 8404 in the genome | 1 | CCG024173.1,CCG005170.1 |
| GO:0006954 | inflammatory response                                         | 2 of 4104 in the list | 2 of 8404 in the genome | 1 | CCG024173.1,CCG005170.1 |
| GO:0007016 | cytoskeletal anchoring at plasma membrane                     | 2 of 4104 in the list | 2 of 8404 in the genome | 1 | CCG014318.1,CCG003587.1 |
| GO:0007026 | negative regulation of microtubule depolymerization           | 2 of 4104 in the list | 2 of 8404 in the genome | 1 | CCG025026.1,CCG019102.1 |
| GO:0007040 | lysosome organization                                         | 2 of 4104 in the list | 2 of 8404 in the genome | 1 | CCG019082.1,CCG013509.1 |
| GO:0008203 | cholesterol metabolic process                                 | 2 of 4104 in the list | 2 of 8404 in the genome | 1 | CCG024095.1,CCG015949.1 |
| GO:0009065 | glutamine family amino acid catabolic process                 | 2 of 4104 in the list | 2 of 8404 in the genome | 1 | CCG007203.1,CCG002231.1 |
| GO:0009200 | deoxyribonucleoside triphosphate metabolic process            | 2 of 4104 in the list | 2 of 8404 in the genome | 1 | CCG010960.2,CCG016222.1 |
| GO:0009211 | pyrimidine deoxyribonucleoside triphosphate metabolic process | 2 of 4104 in the list | 2 of 8404 in the genome | 1 | CCG010960.2,CCG016222.1 |
| GO:0009225 | nucleotide-sugar metabolic                                    | 2 of 4104 in the list | 2 of 8404 in the genome | 1 | CCG022027.1,CCG006998.1 |
| GO:0009264 | deoxyribonucleotide catabolic                                 | 2 of 4104 in the list | 2 of 8404 in the genome | 1 | CCG001445.1,CCG001440.1 |

|            |                                                                                        |                       |                         |   |                         |
|------------|----------------------------------------------------------------------------------------|-----------------------|-------------------------|---|-------------------------|
| GO:0009266 | response to temperature stimulus                                                       | 2 of 4104 in the list | 2 of 8404 in the genome | 1 | CCG002446.2,CCG003657.2 |
| GO:0009267 | cellular response to starvation                                                        | 2 of 4104 in the list | 2 of 8404 in the genome | 1 | CCG002366.1,CCG000834.1 |
| GO:0009405 | pathogenesis                                                                           | 2 of 4104 in the list | 2 of 8404 in the genome | 1 | CCG012551.1,CCG019159.1 |
| GO:0009408 | response to heat                                                                       | 2 of 4104 in the list | 2 of 8404 in the genome | 1 | CCG002446.2,CCG003657.2 |
| GO:0009437 | carnitine metabolic process                                                            | 2 of 4104 in the list | 2 of 8404 in the genome | 1 | CCG020559.1,CCG026331.1 |
| GO:0009991 | response to extracellular stimulus                                                     | 2 of 4104 in the list | 2 of 8404 in the genome | 1 | CCG002366.1,CCG000834.1 |
| GO:0010639 | negative regulation of organelle organization                                          | 2 of 4104 in the list | 2 of 8404 in the genome | 1 | CCG025026.1,CCG019102.1 |
| GO:0010921 | regulation of phosphatase activity                                                     | 2 of 4104 in the list | 2 of 8404 in the genome | 1 | CCG009450.1,CCG017560.1 |
| GO:0016125 | sterol metabolic process                                                               | 2 of 4104 in the list | 2 of 8404 in the genome | 1 | CCG024095.1,CCG015949.1 |
| GO:0016197 | endosomal transport                                                                    | 2 of 4104 in the list | 2 of 8404 in the genome | 1 | CCG017209.1,CCG022927.1 |
| GO:0016236 | macroautophagy                                                                         | 2 of 4104 in the list | 2 of 8404 in the genome | 1 | CCG002366.1,CCG000834.1 |
| GO:0016973 | poly(A)+ mRNA export from                                                              | 2 of 4104 in the list | 2 of 8404 in the genome | 1 | CCG017874.1,CCG026989.1 |
| GO:0018377 | protein myristoylation                                                                 | 2 of 4104 in the list | 2 of 8404 in the genome | 1 | CCG022255.1,CCG025177.1 |
| GO:0019310 | inositol catabolic process                                                             | 2 of 4104 in the list | 2 of 8404 in the genome | 1 | CCG006358.1,CCG005177.1 |
| GO:0019673 | GDP-mannose metabolic process                                                          | 2 of 4104 in the list | 2 of 8404 in the genome | 1 | CCG022027.1,CCG006998.1 |
| GO:0022403 | cell cycle phase                                                                       | 2 of 4104 in the list | 2 of 8404 in the genome | 1 | CCG015077.1,CCG000839.1 |
| GO:0030155 | regulation of cell adhesion                                                            | 2 of 4104 in the list | 2 of 8404 in the genome | 1 | CCG015389.1,CCG008431.1 |
| GO:0030334 | regulation of cell migration                                                           | 2 of 4104 in the list | 2 of 8404 in the genome | 1 | CCG015389.1,CCG008431.1 |
| GO:0030488 | tRNA methylation                                                                       | 2 of 4104 in the list | 2 of 8404 in the genome | 1 | CCG004234.1,CCG023156.1 |
| GO:0030518 | intracellular steroid hormone receptor signaling pathway                               | 2 of 4104 in the list | 2 of 8404 in the genome | 1 | CCG008741.1,CCG008742.1 |
| GO:0030522 | intracellular receptor signaling pathway                                               | 2 of 4104 in the list | 2 of 8404 in the genome | 1 | CCG008741.1,CCG008742.1 |
| GO:0031110 | regulation of microtubule polymerization or depolymerization                           | 2 of 4104 in the list | 2 of 8404 in the genome | 1 | CCG025026.1,CCG019102.1 |
| GO:0031111 | negative regulation of microtubule polymerization or depolymerization                  | 2 of 4104 in the list | 2 of 8404 in the genome | 1 | CCG025026.1,CCG019102.1 |
| GO:0031114 | regulation of microtubule depolymerization                                             | 2 of 4104 in the list | 2 of 8404 in the genome | 1 | CCG025026.1,CCG019102.1 |
| GO:0031145 | anaphase-promoting complex-dependent proteasomal ubiquitin-dependent protein catabolic | 2 of 4104 in the list | 2 of 8404 in the genome | 1 | CCG004331.1,CCG027068.1 |
| GO:0031365 | N-terminal protein amino acid modification                                             | 2 of 4104 in the list | 2 of 8404 in the genome | 1 | CCG022255.1,CCG025177.1 |

|            |                                                                   |                       |                         |   |                         |
|------------|-------------------------------------------------------------------|-----------------------|-------------------------|---|-------------------------|
| GO:0031667 | response to nutrient levels                                       | 2 of 4104 in the list | 2 of 8404 in the genome | 1 | CCG002366.1,CCG000834.1 |
| GO:0031668 | cellular response to extracellular stimulus                       | 2 of 4104 in the list | 2 of 8404 in the genome | 1 | CCG002366.1,CCG000834.1 |
| GO:0031669 | cellular response to nutrient levels                              | 2 of 4104 in the list | 2 of 8404 in the genome | 1 | CCG002366.1,CCG000834.1 |
| GO:0032886 | regulation of microtubule-based process                           | 2 of 4104 in the list | 2 of 8404 in the genome | 1 | CCG025026.1,CCG019102.1 |
| GO:0032989 | cellular component                                                | 2 of 4104 in the list | 2 of 8404 in the genome | 1 | CCG015767.2,CCG006750.1 |
| GO:0035075 | response to ecdysone                                              | 2 of 4104 in the list | 2 of 8404 in the genome | 1 | CCG008741.1,CCG008742.1 |
| GO:0035076 | ecdysone receptor-mediated signaling pathway                      | 2 of 4104 in the list | 2 of 8404 in the genome | 1 | CCG008741.1,CCG008742.1 |
| GO:0035303 | regulation of dephosphorylation                                   | 2 of 4104 in the list | 2 of 8404 in the genome | 1 | CCG009450.1,CCG017560.1 |
| GO:0036314 | response to sterol                                                | 2 of 4104 in the list | 2 of 8404 in the genome | 1 | CCG008741.1,CCG008742.1 |
| GO:0036315 | cellular response to sterol                                       | 2 of 4104 in the list | 2 of 8404 in the genome | 1 | CCG008741.1,CCG008742.1 |
| GO:0040012 | regulation of locomotion                                          | 2 of 4104 in the list | 2 of 8404 in the genome | 1 | CCG015389.1,CCG008431.1 |
| GO:0040029 | regulation of gene expression, epigenetic                         | 2 of 4104 in the list | 2 of 8404 in the genome | 1 | CCG002946.1,CCG022674.1 |
| GO:0042147 | retrograde transport, endosome to Golgi                           | 2 of 4104 in the list | 2 of 8404 in the genome | 1 | CCG017209.1,CCG022927.1 |
| GO:0042256 | mature ribosome assembly                                          | 2 of 4104 in the list | 2 of 8404 in the genome | 1 | CCG023663.1,CCG007518.1 |
| GO:0042594 | response to starvation                                            | 2 of 4104 in the list | 2 of 8404 in the genome | 1 | CCG002366.1,CCG000834.1 |
| GO:0043044 | ATP-dependent chromatin                                           | 2 of 4104 in the list | 2 of 8404 in the genome | 1 | CCG027348.1,CCG000575.1 |
| GO:0043066 | negative regulation of apoptotic process                          | 2 of 4104 in the list | 2 of 8404 in the genome | 1 | CCG020974.1,CCG004073.1 |
| GO:0043069 | negative regulation of programmed cell death                      | 2 of 4104 in the list | 2 of 8404 in the genome | 1 | CCG020974.1,CCG004073.1 |
| GO:0043242 | negative regulation of protein complex disassembly                | 2 of 4104 in the list | 2 of 8404 in the genome | 1 | CCG025026.1,CCG019102.1 |
| GO:0043543 | protein acylation                                                 | 2 of 4104 in the list | 2 of 8404 in the genome | 1 | CCG022255.1,CCG025177.1 |
| GO:0043666 | regulation of phosphoprotein phosphatase activity                 | 2 of 4104 in the list | 2 of 8404 in the genome | 1 | CCG009450.1,CCG017560.1 |
| GO:0044275 | cellular carbohydrate catabolic process                           | 2 of 4104 in the list | 2 of 8404 in the genome | 1 | CCG006358.1,CCG005177.1 |
| GO:0044728 | DNA methylation or demethylation                                  | 2 of 4104 in the list | 2 of 8404 in the genome | 1 | CCG002946.1,CCG022674.1 |
| GO:0045005 | maintenance of fidelity involved in DNA-dependent DNA replication | 2 of 4104 in the list | 2 of 8404 in the genome | 1 | CCG018321.1,CCG026841.1 |

|            |                                                                  |                       |                         |   |                         |
|------------|------------------------------------------------------------------|-----------------------|-------------------------|---|-------------------------|
| GO:0045116 | protein neddylation                                              | 2 of 4104 in the list | 2 of 8404 in the genome | 1 | CCG013109.1,CCG007809.1 |
| GO:0045329 | carnitine biosynthetic process                                   | 2 of 4104 in the list | 2 of 8404 in the genome | 1 | CCG020559.1,CCG026331.1 |
| GO:0045995 | regulation of embryonic                                          | 2 of 4104 in the list | 2 of 8404 in the genome | 1 | CCG015389.1,CCG008431.1 |
| GO:0046080 | dUTP metabolic process                                           | 2 of 4104 in the list | 2 of 8404 in the genome | 1 | CCG010960.2,CCG016222.1 |
| GO:0046164 | alcohol catabolic process                                        | 2 of 4104 in the list | 2 of 8404 in the genome | 1 | CCG006358.1,CCG005177.1 |
| GO:0046174 | polyol catabolic process                                         | 2 of 4104 in the list | 2 of 8404 in the genome | 1 | CCG006358.1,CCG005177.1 |
| GO:0046685 | response to arsenic-containing substance                         | 2 of 4104 in the list | 2 of 8404 in the genome | 1 | CCG013113.1,CCG013809.1 |
| GO:0048280 | vesicle fusion with Golgi apparatus                              | 2 of 4104 in the list | 2 of 8404 in the genome | 1 | CCG020315.1,CCG026620.1 |
| GO:0048478 | replication fork protection                                      | 2 of 4104 in the list | 2 of 8404 in the genome | 1 | CCG018321.1,CCG026841.1 |
| GO:0050793 | regulation of developmental                                      | 2 of 4104 in the list | 2 of 8404 in the genome | 1 | CCG015389.1,CCG008431.1 |
| GO:0051090 | regulation of sequence-specific DNA binding transcription factor | 2 of 4104 in the list | 2 of 8404 in the genome | 1 | CCG009894.1,CCG004151.1 |
| GO:0051103 | DNA ligation involved in DNA                                     | 2 of 4104 in the list | 2 of 8404 in the genome | 1 | CCG021045.1,CCG006919.1 |
| GO:0051129 | negative regulation of cellular component organization           | 2 of 4104 in the list | 2 of 8404 in the genome | 1 | CCG025026.1,CCG019102.1 |
| GO:0051239 | regulation of multicellular organismal process                   | 2 of 4104 in the list | 2 of 8404 in the genome | 1 | CCG015389.1,CCG008431.1 |
| GO:0051270 | regulation of cellular component movement                        | 2 of 4104 in the list | 2 of 8404 in the genome | 1 | CCG015389.1,CCG008431.1 |
| GO:0051494 | negative regulation of cytoskeleton organization                 | 2 of 4104 in the list | 2 of 8404 in the genome | 1 | CCG025026.1,CCG019102.1 |
| GO:0055074 | calcium ion homeostasis                                          | 2 of 4104 in the list | 2 of 8404 in the genome | 1 | CCG026796.1,CCG020400.2 |
| GO:0060548 | negative regulation of cell death                                | 2 of 4104 in the list | 2 of 8404 in the genome | 1 | CCG020974.1,CCG004073.1 |
| GO:0070507 | regulation of microtubule cytoskeleton organization              | 2 of 4104 in the list | 2 of 8404 in the genome | 1 | CCG025026.1,CCG019102.1 |
| GO:0071390 | cellular response to ecdysone                                    | 2 of 4104 in the list | 2 of 8404 in the genome | 1 | CCG008741.1,CCG008742.1 |
| GO:0071496 | cellular response to external                                    | 2 of 4104 in the list | 2 of 8404 in the genome | 1 | CCG002366.1,CCG000834.1 |
| GO:0071722 | detoxification of arsenic-containing substance                   | 2 of 4104 in the list | 2 of 8404 in the genome | 1 | CCG013113.1,CCG013809.1 |
| GO:0072503 | cellular divalent inorganic cation homeostasis                   | 2 of 4104 in the list | 2 of 8404 in the genome | 1 | CCG026796.1,CCG020400.2 |
| GO:0072507 | divalent inorganic cation                                        | 2 of 4104 in the list | 2 of 8404 in the genome | 1 | CCG026796.1,CCG020400.2 |
| GO:0090329 | regulation of DNA-dependent DNA replication                      | 2 of 4104 in the list | 2 of 8404 in the genome | 1 | CCG018321.1,CCG026841.1 |

|            |                                                      |                        |                          |   |                                                                                                                                                                                     |
|------------|------------------------------------------------------|------------------------|--------------------------|---|-------------------------------------------------------------------------------------------------------------------------------------------------------------------------------------|
| GO:0097305 | response to alcohol                                  | 2 of 4104 in the list  | 2 of 8404 in the genome  | 1 | CCG008741.1,CCG008742.1                                                                                                                                                             |
| GO:0097306 | cellular response to alcohol                         | 2 of 4104 in the list  | 2 of 8404 in the genome  | 1 | CCG008741.1,CCG008742.1                                                                                                                                                             |
| GO:1901616 | organic hydroxy compound catabolic process           | 2 of 4104 in the list  | 2 of 8404 in the genome  | 1 | CCG006358.1,CCG005177.1                                                                                                                                                             |
| GO:1901654 | response to ketone                                   | 2 of 4104 in the list  | 2 of 8404 in the genome  | 1 | CCG008741.1,CCG008742.1                                                                                                                                                             |
| GO:1901655 | cellular response to ketone                          | 2 of 4104 in the list  | 2 of 8404 in the genome  | 1 | CCG008741.1,CCG008742.1                                                                                                                                                             |
| GO:1901700 | response to oxygen-containing compound               | 2 of 4104 in the list  | 2 of 8404 in the genome  | 1 | CCG008741.1,CCG008742.1                                                                                                                                                             |
| GO:1901701 | cellular response to oxygen-containing compound      | 2 of 4104 in the list  | 2 of 8404 in the genome  | 1 | CCG008741.1,CCG008742.1                                                                                                                                                             |
| GO:1901879 | regulation of protein                                | 2 of 4104 in the list  | 2 of 8404 in the genome  | 1 | CCG025026.1,CCG019102.1                                                                                                                                                             |
| GO:1901880 | negative regulation of protein depolymerization      | 2 of 4104 in the list  | 2 of 8404 in the genome  | 1 | CCG025026.1,CCG019102.1                                                                                                                                                             |
| GO:2000026 | regulation of multicellular organismal development   | 2 of 4104 in the list  | 2 of 8404 in the genome  | 1 | CCG015389.1,CCG008431.1                                                                                                                                                             |
| GO:2000104 | negative regulation of DNA-dependent DNA replication | 2 of 4104 in the list  | 2 of 8404 in the genome  | 1 | CCG018321.1,CCG026841.1                                                                                                                                                             |
| GO:2000145 | regulation of cell motility                          | 2 of 4104 in the list  | 2 of 8404 in the genome  | 1 | CCG015389.1,CCG008431.1                                                                                                                                                             |
| GO:0006506 | GPI anchor biosynthetic process                      | 15 of 4104 in the list | 26 of 8404 in the genome | 1 | CCG022209.1,CCG017241.1,CCG028332.1,CCG007330.1,CCG009434.1,CCG014839.1,CCG000663.1,CCG013131.1,CCG026370.1,CCG011531.1,CCG024612.1,CCG025889.1,CCG000552.1,CCG004806.1,CCG024760.1 |
| GO:0006661 | phosphatidylinositol biosynthetic process            | 15 of 4104 in the list | 26 of 8404 in the genome | 1 | CCG022209.1,CCG017241.1,CCG028332.1,CCG007330.1,CCG009434.1,CCG014839.1,CCG000663.1,CCG013131.1,CCG026370.1,CCG011531.1,CCG024612.1,CCG025889.1,CCG000552.1,CCG004806.1,CCG024760.1 |
| GO:0009247 | glycolipid biosynthetic process                      | 15 of 4104 in the list | 26 of 8404 in the genome | 1 | CCG022209.1,CCG017241.1,CCG028332.1,CCG007330.1,CCG009434.1,CCG014839.1,CCG000663.1,CCG013131.1,CCG026370.1,CCG011531.1,CCG024612.1,CCG025889.1,CCG000552.1,CCG004806.1,CCG024760.1 |
| GO:0046467 | membrane lipid biosynthetic process                  | 15 of 4104 in the list | 26 of 8404 in the genome | 1 | CCG022209.1,CCG017241.1,CCG028332.1,CCG007330.1,CCG009434.1,CCG014839.1,CCG000663.1,CCG013131.1,CCG026370.1,CCG011531.1,CCG024612.1,CCG025889.1,CCG000552.1,CCG004806.1,CCG024760.1 |



|            |                                           |                        |                          |   |                                                                                                                                                                                                                                     |
|------------|-------------------------------------------|------------------------|--------------------------|---|-------------------------------------------------------------------------------------------------------------------------------------------------------------------------------------------------------------------------------------|
| GO:0006505 | GPI anchor metabolic process              | 16 of 4104 in the list | 28 of 8404 in the genome | 1 | CCG025233.1,CCG022209.1,CCG017241.1,CCG009434.1,CCG014839.1,CCG000663.1,CCG013131.1,CCG026370.1,CCG025889.1,CCG004806.1,CCG000552.1,CCG024760.1,CCG028332.1,CCG007330.1,CCG011531.1,CCG024612.1                                     |
| GO:0006664 | glycolipid metabolic process              | 16 of 4104 in the list | 28 of 8404 in the genome | 1 | CCG025233.1,CCG022209.1,CCG017241.1,CCG009434.1,CCG014839.1,CCG000663.1,CCG013131.1,CCG026370.1,CCG025889.1,CCG004806.1,CCG000552.1,CCG024760.1,CCG028332.1,CCG007330.1,CCG011531.1,CCG024612.1                                     |
| GO:0045017 | glycerolipid biosynthetic process         | 16 of 4104 in the list | 28 of 8404 in the genome | 1 | CCG022209.1,CCG017241.1,CCG009434.1,CCG014839.1,CCG000663.1,CCG013131.1,CCG026370.1,CCG025889.1,CCG004806.1,CCG000552.1,CCG024760.1,CCG028332.1,CCG007330.1,CCG011531.1,CCG021610.1,CCG024612.1                                     |
| GO:0046474 | glycerophospholipid biosynthetic process  | 16 of 4104 in the list | 28 of 8404 in the genome | 1 | CCG022209.1,CCG017241.1,CCG009434.1,CCG014839.1,CCG000663.1,CCG013131.1,CCG026370.1,CCG025889.1,CCG004806.1,CCG000552.1,CCG024760.1,CCG028332.1,CCG007330.1,CCG011531.1,CCG021610.1,CCG024612.1                                     |
| GO:0006401 | RNA catabolic process                     | 7 of 4104 in the list  | 11 of 8404 in the genome | 1 | CCG018917.1,CCG020685.1,CCG005524.1,CCG004448.2,CCG026612.1,CCG019674.1,CCG007690.1                                                                                                                                                 |
| GO:0006801 | superoxide metabolic process              | 7 of 4104 in the list  | 11 of 8404 in the genome | 1 | CCG011248.1,CCG008803.1,CCG026431.1,CCG012208.1,CCG017478.1,CCG012209.1,CCG015612.1                                                                                                                                                 |
| GO:0072593 | reactive oxygen species metabolic process | 7 of 4104 in the list  | 11 of 8404 in the genome | 1 | CCG011248.1,CCG008803.1,CCG026431.1,CCG012208.1,CCG017478.1,CCG012209.1,CCG015612.1                                                                                                                                                 |
| GO:0006915 | apoptotic process                         | 19 of 4104 in the list | 34 of 8404 in the genome | 1 | CCG010441.1,CCG022871.1,CCG009690.1,CCG009015.1,CCG018585.3,CCG027145.1,CCG021664.1,CCG009582.1,CCG016399.1,CCG022095.1,CCG024631.1,CCG018248.1,CCG009405.1,CCG015407.1,CCG011446.1,CCG003007.1,CCG009823.1,CCG021236.1,CCG000445.1 |
| GO:0008219 | cell death                                | 19 of 4104 in the list | 34 of 8404 in the genome | 1 | CCG010441.1,CCG022871.1,CCG009690.1,CCG009015.1,CCG018585.3,CCG027145.1,CCG021664.1,CCG009582.1,CCG016399.1,CCG022095.1,CCG024631.1,CCG018248.1,CCG009405.1,CCG015407.1,CCG011446.1,CCG003007.1,CCG009823.1,CCG021236.1,CCG000445.1 |

|            |                                            |                        |                          |   |                                                                                                                                                                                                                                                                                                  |
|------------|--------------------------------------------|------------------------|--------------------------|---|--------------------------------------------------------------------------------------------------------------------------------------------------------------------------------------------------------------------------------------------------------------------------------------------------|
| GO:0012501 | programmed cell death                      | 19 of 4104 in the list | 34 of 8404 in the genome | 1 | CCG010441.1,CCG022871.1,CCG009690.1,CCG009015.1,CCG018585.3,CCG027145.1,CCG021664.1,CCG009582.1,CCG016399.1,CCG022095.1,CCG024631.1,CCG018248.1,CCG009405.1,CCG015407.1,CCG011446.1,CCG003007.1,CCG009823.1,CCG021236.1,CCG000445.1                                                              |
| GO:0016265 | death                                      | 19 of 4104 in the list | 34 of 8404 in the genome | 1 | CCG010441.1,CCG022871.1,CCG009690.1,CCG009015.1,CCG018585.3,CCG027145.1,CCG021664.1,CCG009582.1,CCG016399.1,CCG022095.1,CCG024631.1,CCG018248.1,CCG009405.1,CCG015407.1,CCG011446.1,CCG003007.1,CCG009823.1,CCG021236.1,CCG000445.1                                                              |
| GO:0006546 | glycine catabolic process                  | 8 of 4104 in the list  | 13 of 8404 in the genome | 1 | CCG019834.1,CCG010111.1,CCG025108.1,CCG001082.1,CCG003063.1,CCG020154.1,CCG008510.1,CCG008388.1                                                                                                                                                                                                  |
| GO:0009071 | serine family amino acid catabolic process | 8 of 4104 in the list  | 13 of 8404 in the genome | 1 | CCG019834.1,CCG010111.1,CCG025108.1,CCG001082.1,CCG003063.1,CCG020154.1,CCG008510.1,CCG008388.1                                                                                                                                                                                                  |
| GO:0009112 | nucleobase metabolic process               | 8 of 4104 in the list  | 13 of 8404 in the genome | 1 | CCG017175.1,CCG018108.1,CCG016614.1,CCG026852.1,CCG004257.1,CCG005938.1,CCG025940.1,CCG017331.1                                                                                                                                                                                                  |
| GO:0008654 | phospholipid biosynthetic process          | 25 of 4104 in the list | 46 of 8404 in the genome | 1 | CCG004532.1,CCG022209.1,CCG017241.1,CCG009434.1,CCG014839.1,CCG000663.1,CCG013131.1,CCG026370.1,CCG012308.1,CCG016653.1,CCG025889.1,CCG004806.1,CCG000552.1,CCG024760.1,CCG022352.1,CCG028332.1,CCG023757.1,CCG007330.1,CCG006965.1,CCG014174.1,CCG011531.1,CCG024612.1,CCG021610.1,CCG024155.1, |

|            |                                                  |                         |                            |   |                                                                                                                                                                                                                                                                                                                                                                                                                                                                                                                                                                                                                                                                                                                                                                                                                                                                                                                                                                                                                                                                                                                                                                                                                                                                                                                                                                                                                                                                                                                                                                                                                      |
|------------|--------------------------------------------------|-------------------------|----------------------------|---|----------------------------------------------------------------------------------------------------------------------------------------------------------------------------------------------------------------------------------------------------------------------------------------------------------------------------------------------------------------------------------------------------------------------------------------------------------------------------------------------------------------------------------------------------------------------------------------------------------------------------------------------------------------------------------------------------------------------------------------------------------------------------------------------------------------------------------------------------------------------------------------------------------------------------------------------------------------------------------------------------------------------------------------------------------------------------------------------------------------------------------------------------------------------------------------------------------------------------------------------------------------------------------------------------------------------------------------------------------------------------------------------------------------------------------------------------------------------------------------------------------------------------------------------------------------------------------------------------------------------|
| GO:0006139 | nucleobase-containing compound metabolic process | 790 of 4104 in the list | 1595 of 8404 in the genome | 1 | CCG017420.1,CCG027300.1,CCG014396.1,CCG006549.1,<br>CCG026106.1,CCG006357.1,CCG009878.1,CCG024072.1,<br>CCG026174.1,CCG020685.1,CCG013625.1,CCG004468.1,<br>CCG023989.1,CCG016238.1,CCG024584.1,CCG001292.1,<br>CCG018321.1,CCG002470.1,CCG005194.1,CCG001040.1,<br>CCG014836.1,CCG025208.1,CCG025307.1,CCG019382.1,<br>CCG016370.1,CCG016094.1,CCG027183.2,CCG023474.1,<br>CCG010792.1,CCG004231.1,CCG012623.1,CCG010905.1,<br>CCG020471.1,CCG021110.1,CCG010909.1,CCG023129.1,<br>CCG028653.1,CCG021342.1,CCG024326.1,CCG014946.1,<br>CCG020286.1,CCG002735.1,CCG027133.1,CCG014280.1,<br>CCG015694.1,CCG013865.1,CCG025396.1,CCG006484.1,<br>CCG026953.1,CCG001461.1,CCG023686.1,CCG004402.1,<br>CCG019678.1,CCG003938.1,CCG023468.1,CCG025990.1,<br>CCG013641.1,CCG015350.1,CCG003495.1,CCG021948.1,<br>CCG011148.1,CCG020651.1,CCG025131.2,CCG005284.1,<br>CCG004927.1,CCG023452.1,CCG009805.2,CCG002852.1,<br>CCG019545.1,CCG003142.1,CCG021137.1,CCG013610.1,<br>CCG001876.1,CCG012584.1,CCG013465.1,CCG009518.1,<br>CCG024200.1,CCG010624.1,CCG023125.1,CCG016381.1,<br>CCG011727.1,CCG026865.1,CCG017001.1,CCG024788.1,<br>CCG007263.1,CCG021767.1,CCG004926.1,CCG001285.1,<br>CCG004907.1,CCG010912.1,CCG004955.1,CCG015367.1,<br>CCG003750.1,CCG005524.1,CCG026047.1,CCG024857.1,<br>CCG022772.1,CCG010136.1,CCG005501.1,CCG003310.1,<br>CCG026516.1,CCG024570.2,CCG018164.1,CCG013617.1,<br>CCG004224.1,CCG010112.1,CCG022513.2,CCG028092.1,<br>CCG018650.1,CCG000209.1,CCG016760.1,CCG021521.1,<br>CCG007902.1,CCG023486.1,CCG024232.1,CCG006133.1,<br>CCG001395.1,CCG016557.1,CCG023184.1,CCG021990.1, |
|------------|--------------------------------------------------|-------------------------|----------------------------|---|----------------------------------------------------------------------------------------------------------------------------------------------------------------------------------------------------------------------------------------------------------------------------------------------------------------------------------------------------------------------------------------------------------------------------------------------------------------------------------------------------------------------------------------------------------------------------------------------------------------------------------------------------------------------------------------------------------------------------------------------------------------------------------------------------------------------------------------------------------------------------------------------------------------------------------------------------------------------------------------------------------------------------------------------------------------------------------------------------------------------------------------------------------------------------------------------------------------------------------------------------------------------------------------------------------------------------------------------------------------------------------------------------------------------------------------------------------------------------------------------------------------------------------------------------------------------------------------------------------------------|

|            |                                              |                         |                            |   |                                                                                                                                                                                                                                                                                                                                                                                                                                                                                                                                                                                                                                                                                                                                                                                                                                                                                                                                                                                                                                                                                                                                                                                                                                                                                                                                                                                                                                                                                                  |
|------------|----------------------------------------------|-------------------------|----------------------------|---|--------------------------------------------------------------------------------------------------------------------------------------------------------------------------------------------------------------------------------------------------------------------------------------------------------------------------------------------------------------------------------------------------------------------------------------------------------------------------------------------------------------------------------------------------------------------------------------------------------------------------------------------------------------------------------------------------------------------------------------------------------------------------------------------------------------------------------------------------------------------------------------------------------------------------------------------------------------------------------------------------------------------------------------------------------------------------------------------------------------------------------------------------------------------------------------------------------------------------------------------------------------------------------------------------------------------------------------------------------------------------------------------------------------------------------------------------------------------------------------------------|
| GO:0034641 | cellular nitrogen compound metabolic process | 829 of 4104 in the list | 1676 of 8404 in the genome | 1 | CCG017420.1,CCG027300.1,CCG014396.1,CCG006549.1,CCG026106.1,CCG006357.1,CCG009878.1,CCG024072.1,CCG012875.1,CCG026174.1,CCG020685.1,CCG013625.1,CCG004468.1,CCG023989.1,CCG016238.1,CCG024584.1,CCG001292.1,CCG018321.1,CCG002470.1,CCG005194.1,CCG001040.1,CCG014836.1,CCG025208.1,CCG025307.1,CCG019382.1,CCG016370.1,CCG016094.1,CCG027183.2,CCG023474.1,CCG010792.1,CCG004231.1,CCG012623.1,CCG005053.1,CCG010905.1,CCG020471.1,CCG021110.1,CCG010909.1,CCG023129.1,CCG028653.1,CCG021342.1,CCG024326.1,CCG014946.1,CCG020286.1,CCG002735.1,CCG027133.1,CCG021086.2,CCG014280.1,CCG015694.1,CCG013865.1,CCG025396.1,CCG006484.1,CCG026953.1,CCG001461.1,CCG023686.1,CCG004402.1,CCG019678.1,CCG003938.1,CCG023468.1,CCG025990.1,CCG013641.1,CCG006821.1,CCG015350.1,CCG003495.1,CCG021948.1,CCG011148.1,CCG020651.1,CCG025131.2,CCG005284.1,CCG004927.1,CCG023452.1,CCG009805.2,CCG002852.1,CCG019545.1,CCG003142.1,CCG021137.1,CCG013610.1,CCG001876.1,CCG012584.1,CCG013465.1,CCG009518.1,CCG024200.1,CCG010624.1,CCG023125.1,CCG016381.1,CCG011727.1,CCG026865.1,CCG017001.1,CCG024788.1,CCG007263.1,CCG021767.1,CCG004926.1,CCG001285.1,CCG004907.1,CCG010912.1,CCG004955.1,CCG015367.1,CCG003750.1,CCG005524.1,CCG026047.1,CCG011491.1,CCG024857.1,CCG022772.1,CCG010136.1,CCG009333.1,CCG005501.1,CCG003310.1,CCG026516.1,CCG024570.2,CCG018164.1,CCG013617.1,CCG004224.1,CCG010112.1,CCG022513.2,CCG028092.1,CCG018650.1,CCG000209.1,CCG016760.1,CCG021521.1,CCG007902.1,CCG023486.1, |
|------------|----------------------------------------------|-------------------------|----------------------------|---|--------------------------------------------------------------------------------------------------------------------------------------------------------------------------------------------------------------------------------------------------------------------------------------------------------------------------------------------------------------------------------------------------------------------------------------------------------------------------------------------------------------------------------------------------------------------------------------------------------------------------------------------------------------------------------------------------------------------------------------------------------------------------------------------------------------------------------------------------------------------------------------------------------------------------------------------------------------------------------------------------------------------------------------------------------------------------------------------------------------------------------------------------------------------------------------------------------------------------------------------------------------------------------------------------------------------------------------------------------------------------------------------------------------------------------------------------------------------------------------------------|

|            |                                                         |                          |                            |   |                                                                                                                                                                                                                                                                                                                                                                                                                                                                                                                                                                                                                                                                                                                                                                                                                                                                                                                                                                                                                                                                                                                                                                                                                                                                                                                                                                                                                                                                                                  |
|------------|---------------------------------------------------------|--------------------------|----------------------------|---|--------------------------------------------------------------------------------------------------------------------------------------------------------------------------------------------------------------------------------------------------------------------------------------------------------------------------------------------------------------------------------------------------------------------------------------------------------------------------------------------------------------------------------------------------------------------------------------------------------------------------------------------------------------------------------------------------------------------------------------------------------------------------------------------------------------------------------------------------------------------------------------------------------------------------------------------------------------------------------------------------------------------------------------------------------------------------------------------------------------------------------------------------------------------------------------------------------------------------------------------------------------------------------------------------------------------------------------------------------------------------------------------------------------------------------------------------------------------------------------------------|
| GO:0008152 | metabolic process                                       | 2768 of 4104 in the list | 5643 of 8404 in the genome | 1 | CCG014531.2,CCG006922.1,CCG017420.1,CCG027068.1,CCG004122.1,CCG004887.1,CCG002508.1,CCG026106.1,CCG027449.1,CCG000746.1,CCG016952.1,CCG012875.1,CCG025108.1,CCG028016.1,CCG004468.1,CCG023989.1,CCG012726.1,CCG024584.1,CCG004020.1,CCG013059.1,CCG025836.1,CCG012949.1,CCG017266.1,CCG006875.2,CCG011763.1,CCG025208.1,CCG021479.1,CCG003362.1,CCG023381.1,CCG019382.1,CCG016094.1,CCG026413.3,CCG023474.1,CCG017255.1,CCG000948.1,CCG026871.2,CCG010792.1,CCG022025.2,CCG005053.1,CCG021616.1,CCG003767.1,CCG010905.1,CCG008270.1,CCG007696.1,CCG021110.1,CCG009270.1,CCG024612.1,CCG003624.1,CCG028653.1,CCG013109.1,CCG018625.1,CCG006465.1,CCG019571.1,CCG015694.1,CCG018788.1,CCG002982.1,CCG012083.1,CCG023451.1,CCG027190.1,CCG024119.1,CCG023686.1,CCG013641.1,CCG015350.1,CCG021948.1,CCG007467.1,CCG004927.1,CCG024903.1,CCG021137.1,CCG022056.1,CCG013610.1,CCG001876.1,CCG013465.1,CCG018688.1,CCG006456.1,CCG024200.1,CCG008902.1,CCG020663.1,CCG023458.1,CCG025096.1,CCG024708.1,CCG024865.1,CCG004926.1,CCG006928.1,CCG004532.1,CCG000789.1,CCG019844.1,CCG017381.1,CCG010912.1,CCG001704.1,CCG005524.1,CCG024784.1,CCG001289.1,CCG011547.1,CCG013640.1,CCG008404.1,CCG010136.1,CCG027015.1,CCG022370.1,CCG007729.1,CCG020803.1,CCG020179.1,CCG010112.1,CCG022513.2,CCG004986.1,CCG007750.2,CCG027989.1,CCG025707.1,CCG028092.1,CCG019831.2,CCG019825.2,CCG011793.1,CCG001395.1,CCG024155.1,CCG016557.1,CCG007395.1,CCG021990.1,CCG002514.1,CCG027000.1,CCG006804.1,CCG007814.1, |
| GO:0000097 | sulfur amino acid biosynthetic process                  | 3 of 4104 in the list    | 4 of 8404 in the genome    | 1 | CCG015568. 1, CCG015567. 1, CCG025636. 2                                                                                                                                                                                                                                                                                                                                                                                                                                                                                                                                                                                                                                                                                                                                                                                                                                                                                                                                                                                                                                                                                                                                                                                                                                                                                                                                                                                                                                                         |
| GO:0000394 | RNA splicing, via endonucleolytic cleavage and ligation | 3 of 4104 in the list    | 4 of 8404 in the genome    | 1 | CCG000583. 2, CCG009393. 1, CCG000939. 1                                                                                                                                                                                                                                                                                                                                                                                                                                                                                                                                                                                                                                                                                                                                                                                                                                                                                                                                                                                                                                                                                                                                                                                                                                                                                                                                                                                                                                                         |
| GO:0000726 | non-recombinational repair                              | 3 of 4104 in the list    | 4 of 8404 in the genome    | 1 | CCG018472. 1, CCG004233. 1, CCG023155. 1                                                                                                                                                                                                                                                                                                                                                                                                                                                                                                                                                                                                                                                                                                                                                                                                                                                                                                                                                                                                                                                                                                                                                                                                                                                                                                                                                                                                                                                         |

|            |                                                          |                       |                         |   |                                       |
|------------|----------------------------------------------------------|-----------------------|-------------------------|---|---------------------------------------|
| GO:0006021 | inositol biosynthetic process                            | 3 of 4104 in the list | 4 of 8404 in the genome | 1 | CCG014174.1, CCG023757.1, CCG016653.1 |
| GO:0006303 | double-strand break repair via nonhomologous end joining | 3 of 4104 in the list | 4 of 8404 in the genome | 1 | CCG018472.1, CCG004233.1, CCG023155.1 |
| GO:0006388 | tRNA splicing, via endonucleolytic cleavage and ligation | 3 of 4104 in the list | 4 of 8404 in the genome | 1 | CCG000583.2, CCG009393.1, CCG000939.1 |
| GO:0006428 | isoleucyl-tRNA aminoacylation                            | 3 of 4104 in the list | 4 of 8404 in the genome | 1 | CCG009878.1, CCG006231.1, CCG003528.1 |
| GO:0006433 | prolyl-tRNA aminoacylation                               | 3 of 4104 in the list | 4 of 8404 in the genome | 1 | CCG001811.1, CCG002018.1, CCG024526.1 |
| GO:0006434 | seryl-tRNA aminoacylation                                | 3 of 4104 in the list | 4 of 8404 in the genome | 1 | CCG019545.1, CCG021716.1, CCG014396.1 |
| GO:0006535 | cysteine biosynthetic process from serine                | 3 of 4104 in the list | 4 of 8404 in the genome | 1 | CCG015568.1, CCG015567.1, CCG025636.2 |
| GO:0006842 | tricarboxylic acid transport                             | 3 of 4104 in the list | 4 of 8404 in the genome | 1 | CCG008734.1, CCG004637.1, CCG010965.1 |
| GO:0008616 | queuosine biosynthetic process                           | 3 of 4104 in the list | 4 of 8404 in the genome | 1 | CCG027125.1, CCG004440.1, CCG010460.1 |
| GO:0009186 | deoxyribonucleoside diphosphate metabolic process        | 3 of 4104 in the list | 4 of 8404 in the genome | 1 | CCG000217.1, CCG004191.1, CCG014116.1 |
| GO:0009653 | anatomical structure morphogenesis                       | 3 of 4104 in the list | 4 of 8404 in the genome | 1 | CCG015767.2, CCG006750.1, CCG028121.1 |
| GO:0010035 | response to inorganic substance                          | 3 of 4104 in the list | 4 of 8404 in the genome | 1 | CCG017154.1, CCG026054.2, CCG026055.1 |
| GO:0010038 | response to metal ion                                    | 3 of 4104 in the list | 4 of 8404 in the genome | 1 | CCG017154.1, CCG026054.2, CCG026055.1 |
| GO:0015746 | citrate transport                                        | 3 of 4104 in the list | 4 of 8404 in the genome | 1 | CCG008734.1, CCG004637.1, CCG010965.1 |
| GO:0019344 | cysteine biosynthetic process                            | 3 of 4104 in the list | 4 of 8404 in the genome | 1 | CCG015568.1, CCG015567.1, CCG025636.2 |
| GO:0030031 | cell projection assembly                                 | 3 of 4104 in the list | 4 of 8404 in the genome | 1 | CCG018859.3, CCG017033.1, CCG015583.1 |
| GO:0045980 | negative regulation of nucleotide metabolic process      | 3 of 4104 in the list | 4 of 8404 in the genome | 1 | CCG000890.1, CCG028409.1, CCG002823.1 |
| GO:0046116 | queuosine metabolic process                              | 3 of 4104 in the list | 4 of 8404 in the genome | 1 | CCG027125.1, CCG004440.1, CCG010460.1 |
| GO:0046173 | polyol biosynthetic process                              | 3 of 4104 in the list | 4 of 8404 in the genome | 1 | CCG014174.1, CCG023757.1, CCG016653.1 |
| GO:0046847 | filopodium assembly                                      | 3 of 4104 in the list | 4 of 8404 in the genome | 1 | CCG018859.3, CCG017033.1, CCG015583.1 |
| GO:0051301 | cell division                                            | 3 of 4104 in the list | 4 of 8404 in the genome | 1 | CCG018249.1, CCG016878.1, CCG024595.1 |
| GO:0090305 | nucleic acid phosphodiester bond hydrolysis              | 3 of 4104 in the list | 4 of 8404 in the genome | 1 | CCG023511.1, CCG009582.1, CCG007636.1 |

|            |                                                 |                        |                           |   |                                                                                                                                                                                                                                                                                                                                                                                                                                                                                                                                                                                                                                                                                                                                                                                                                                                                                                                                                                                                                                                                                                                      |
|------------|-------------------------------------------------|------------------------|---------------------------|---|----------------------------------------------------------------------------------------------------------------------------------------------------------------------------------------------------------------------------------------------------------------------------------------------------------------------------------------------------------------------------------------------------------------------------------------------------------------------------------------------------------------------------------------------------------------------------------------------------------------------------------------------------------------------------------------------------------------------------------------------------------------------------------------------------------------------------------------------------------------------------------------------------------------------------------------------------------------------------------------------------------------------------------------------------------------------------------------------------------------------|
| GO:1901136 | carbohydrate derivative catabolic process       | 77 of 4104 in the list | 150 of 8404 in the genome | 1 | CCG006420. 1, CCG017420. 1, CCG002549. 1, CCG007060. 1, CCG013000. 1, CCG024327. 1, CCG015386. 1, CCG019020. 1, CCG009243. 1, CCG004020. 1, CCG016477. 1, CCG009685. 1, CCG009607. 1, CCG011006. 1, CCG012048. 1, CCG007827. 1, CCG014434. 1, CCG006421. 1, CCG023963. 3, CCG005029. 1, CCG015610. 1, CCG020799. 1, CCG025027. 1, CCG016370. 1, CCG020793. 1, CCG019103. 1, CCG019629. 2, CCG002917. 1, CCG023890. 1, CCG020909. 1, CCG007532. 1, CCG007531. 1, CCG018447. 1, CCG016966. 1, CCG018820. 3, CCG010019. 1, CCG025179. 1, CCG006777. 1, CCG025973. 1, CCG013637. 1, CCG002418. 1, CCG001440. 1, CCG010418. 1, CCG009080. 1, CCG004869. 1, CCG021117. 1, CCG025396. 1, CCG026953. 1, CCG006924. 1, CCG021220. 1, CCG025962. 1, CCG012164. 1, CCG008748. 1, CCG013641. 1, CCG016027. 1, CCG019470. 1, CCG015289. 1, CCG003495. 1, CCG021411. 1, CCG015907. 1, CCG001859. 1, CCG026336. 1, CCG005886. 1, CCG025131. 2, CCG016542. 1, CCG024829. 1, CCG028235. 1, CCG015654. 1, CCG026154. 1, CCG002852. 1, CCG010864. 1, CCG001445. 1, CCG002417. 1, CCG023420. 1, CCG021152. 1, CCG023526. 2, CCG011996. 1 |
| GO:1901068 | guanosine-containing compound metabolic process | 60 of 4104 in the list | 116 of 8404 in the genome | 1 | CCG006420. 1, CCG017420. 1, CCG002549. 1, CCG025973. 1, CCG017995. 1, CCG007060. 1, CCG013000. 1, CCG013637. 1, CCG010418. 1, CCG006529. 1, CCG004869. 1, CCG009080. 1, CCG024327. 1, CCG015386. 1, CCG019020. 1, CCG009243. 1, CCG025396. 1, CCG026953. 1, CCG006924. 1, CCG007417. 1, CCG021220. 1, CCG009607. 1, CCG011006. 1, CCG008748. 1, CCG007827. 1, CCG014434. 1, CCG006421. 1, CCG023963. 3, CCG013641. 1, CCG016027. 1, CCG015289. 1, CCG025027. 1, CCG021411. 1, CCG003495. 1, CCG001859. 1, CCG026336. 1, CCG016370. 1, CCG019103. 1, CCG019629. 2, CCG005886. 1, CCG002917. 1, CCG025131. 2, CCG016542. 1, CCG026154. 1, CCG015654. 1, CCG018659. 2, CCG010864. 1, CCG002852. 1, CCG020909. 1, CCG007532. 1, CCG007531. 1, CCG018447. 1, CCG016966. 1, CCG018820. 3, CCG006791. 1, CCG021110. 1, CCG021152. 1, CCG023526. 2, CCG025179. 1, CCG006777. 1                                                                                                                                                                                                                                               |
| GO:0006366 | transcription from RNA polymerase II promoter   | 14 of 4104 in the list | 25 of 8404 in the genome  | 1 | CCG000158. 1, CCG017812. 1, CCG020286. 1, CCG021083. 1, CCG023775. 1, CCG020044. 1, CCG001292. 1, CCG011083. 1, CCG020129. 1, CCG020460. 1, CCG025691. 1, CCG010175. 1, CCG023184. 1, CCG026882. 1                                                                                                                                                                                                                                                                                                                                                                                                                                                                                                                                                                                                                                                                                                                                                                                                                                                                                                                   |

|            |                                                                         |                       |                         |   |                                                    |
|------------|-------------------------------------------------------------------------|-----------------------|-------------------------|---|----------------------------------------------------|
| GO:0006122 | mitochondrial electron transport, ubiquinol to cytochrome c             | 4 of 4104 in the list | 6 of 8404 in the genome | 1 | CCG020879.1, CCG001649.1, CCG024297.1, CCG006864.1 |
| GO:0006165 | nucleoside diphosphate phosphorylation                                  | 4 of 4104 in the list | 6 of 8404 in the genome | 1 | CCG021110.1, CCG006529.1, CCG017995.1, CCG007417.1 |
| GO:0006183 | GTP biosynthetic process                                                | 4 of 4104 in the list | 6 of 8404 in the genome | 1 | CCG021110.1, CCG006529.1, CCG017995.1, CCG007417.1 |
| GO:0006228 | UTP biosynthetic process                                                | 4 of 4104 in the list | 6 of 8404 in the genome | 1 | CCG021110.1, CCG006529.1, CCG017995.1, CCG007417.1 |
| GO:0006241 | CTP biosynthetic process                                                | 4 of 4104 in the list | 6 of 8404 in the genome | 1 | CCG021110.1, CCG006529.1, CCG017995.1, CCG007417.1 |
| GO:0006419 | alanyl-tRNA aminoacylation                                              | 4 of 4104 in the list | 6 of 8404 in the genome | 1 | CCG000138.1, CCG023277.1, CCG008789.1, CCG010191.3 |
| GO:0009074 | aromatic amino acid family catabolic process                            | 4 of 4104 in the list | 6 of 8404 in the genome | 1 | CCG011789.1, CCG011721.1, CCG006059.1, CCG011722.1 |
| GO:0009148 | pyrimidine nucleoside triphosphate biosynthetic process                 | 4 of 4104 in the list | 6 of 8404 in the genome | 1 | CCG021110.1, CCG006529.1, CCG017995.1, CCG007417.1 |
| GO:0009208 | pyrimidine ribonucleoside triphosphate metabolic process                | 4 of 4104 in the list | 6 of 8404 in the genome | 1 | CCG021110.1, CCG006529.1, CCG017995.1, CCG007417.1 |
| GO:0009209 | pyrimidine ribonucleoside triphosphate biosynthetic process             | 4 of 4104 in the list | 6 of 8404 in the genome | 1 | CCG021110.1, CCG006529.1, CCG017995.1, CCG007417.1 |
| GO:0009219 | pyrimidine deoxyribonucleotide metabolic process                        | 4 of 4104 in the list | 6 of 8404 in the genome | 1 | CCG010960.2, CCG016222.1, CCG004180.1, CCG014116.1 |
| GO:0009312 | oligosaccharide biosynthetic process                                    | 4 of 4104 in the list | 6 of 8404 in the genome | 1 | CCG019693.1, CCG014260.1, CCG024762.1, CCG013129.1 |
| GO:0009394 | 2'-deoxyribonucleotide metabolic process                                | 4 of 4104 in the list | 6 of 8404 in the genome | 1 | CCG010960.2, CCG016222.1, CCG004180.1, CCG014116.1 |
| GO:0010563 | negative regulation of phosphorus metabolic process                     | 4 of 4104 in the list | 6 of 8404 in the genome | 1 | CCG000890.1, CCG028409.1, CCG002823.1, CCG021794.1 |
| GO:0010941 | regulation of cell death                                                | 4 of 4104 in the list | 6 of 8404 in the genome | 1 | CCG020974.1, CCG007246.2, CCG004073.1, CCG007684.1 |
| GO:0019692 | deoxyribose phosphate metabolic process                                 | 4 of 4104 in the list | 6 of 8404 in the genome | 1 | CCG010960.2, CCG016222.1, CCG004180.1, CCG014116.1 |
| GO:0042981 | regulation of apoptotic process                                         | 4 of 4104 in the list | 6 of 8404 in the genome | 1 | CCG020974.1, CCG007246.2, CCG004073.1, CCG007684.1 |
| GO:0043067 | regulation of programmed cell death                                     | 4 of 4104 in the list | 6 of 8404 in the genome | 1 | CCG020974.1, CCG007246.2, CCG004073.1, CCG007684.1 |
| GO:0045935 | positive regulation of nucleobase-containing compound metabolic process | 4 of 4104 in the list | 6 of 8404 in the genome | 1 | CCG018164.1, CCG026216.1, CCG021944.1, CCG027118.1 |



|            |                                                            |                        |                           |   |                                                                                                                                                                                                                                                                                                                                                                                                                                                                                                                                                                                                                                                                                                                                                                                  |
|------------|------------------------------------------------------------|------------------------|---------------------------|---|----------------------------------------------------------------------------------------------------------------------------------------------------------------------------------------------------------------------------------------------------------------------------------------------------------------------------------------------------------------------------------------------------------------------------------------------------------------------------------------------------------------------------------------------------------------------------------------------------------------------------------------------------------------------------------------------------------------------------------------------------------------------------------|
| GO:0045936 | negative regulation of phosphate metabolic process         | 4 of 4104 in the list  | 6 of 8404 in the genome   | 1 | CCG000890.1, CCG028409.1, CCG002823.1, CCG021794.1                                                                                                                                                                                                                                                                                                                                                                                                                                                                                                                                                                                                                                                                                                                               |
| GO:0046036 | CTP metabolic process                                      | 4 of 4104 in the list  | 6 of 8404 in the genome   | 1 | CCG021110.1, CCG006529.1, CCG017995.1, CCG007417.1                                                                                                                                                                                                                                                                                                                                                                                                                                                                                                                                                                                                                                                                                                                               |
| GO:0046051 | UTP metabolic process                                      | 4 of 4104 in the list  | 6 of 8404 in the genome   | 1 | CCG021110.1, CCG006529.1, CCG017995.1, CCG007417.1                                                                                                                                                                                                                                                                                                                                                                                                                                                                                                                                                                                                                                                                                                                               |
| GO:0046939 | nucleotide phosphorylation                                 | 4 of 4104 in the list  | 6 of 8404 in the genome   | 1 | CCG021110.1, CCG006529.1, CCG017995.1, CCG007417.1                                                                                                                                                                                                                                                                                                                                                                                                                                                                                                                                                                                                                                                                                                                               |
| GO:0051173 | positive regulation of nitrogen compound metabolic process | 4 of 4104 in the list  | 6 of 8404 in the genome   | 1 | CCG018164.1, CCG026216.1, CCG021944.1, CCG027118.1                                                                                                                                                                                                                                                                                                                                                                                                                                                                                                                                                                                                                                                                                                                               |
| GO:0051254 | positive regulation of RNA metabolic process               | 4 of 4104 in the list  | 6 of 8404 in the genome   | 1 | CCG018164.1, CCG026216.1, CCG021944.1, CCG027118.1                                                                                                                                                                                                                                                                                                                                                                                                                                                                                                                                                                                                                                                                                                                               |
| GO:0070925 | organelle assembly                                         | 4 of 4104 in the list  | 6 of 8404 in the genome   | 1 | CCG023663.1, CCG002366.1, CCG007518.1, CCG000834.1                                                                                                                                                                                                                                                                                                                                                                                                                                                                                                                                                                                                                                                                                                                               |
| GO:0046039 | GTP metabolic process                                      | 58 of 4104 in the list | 113 of 8404 in the genome | 1 | CCG006420.1, CCG017420.1, CCG002549.1, CCG025973.1, CCG017995.1, CCG007060.1, CCG013000.1, CCG013637.1, CCG010418.1, CCG006529.1, CCG004869.1, CCG009080.1, CCG024327.1, CCG015386.1, CCG019020.1, CCG009243.1, CCG025396.1, CCG026953.1, CCG006924.1, CCG007417.1, CCG021220.1, CCG009607.1, CCG011006.1, CCG008748.1, CCG007827.1, CCG014434.1, CCG006421.1, CCG023963.3, CCG013641.1, CCG016027.1, CCG015289.1, CCG025027.1, CCG021411.1, CCG003495.1, CCG001859.1, CCG026336.1, CCG016370.1, CCG019103.1, CCG019629.2, CCG005886.1, CCG002917.1, CCG025131.2, CCG016542.1, CCG026154.1, CCG015654.1, CCG002852.1, CCG010864.1, CCG020909.1, CCG007532.1, CCG007531.1, CCG018447.1, CCG016966.1, CCG018820.3, CCG021110.1, CCG021152.1, CCG023526.2, CCG025179.1, CCG006777.1 |
| GO:0044283 | small molecule biosynthetic process                        | 53 of 4104 in the list | 103 of 8404 in the genome | 1 | CCG007203.1, CCG010174.2, CCG019954.3, CCG009244.1, CCG012408.1, CCG011491.1, CCG015921.1, CCG020559.1, CCG009333.1, CCG028131.1, CCG017894.1, CCG013043.1, CCG017097.1, CCG016220.1, CCG015568.1, CCG016315.1, CCG021610.1, CCG020441.1, CCG027312.1, CCG006821.1, CCG000682.1, CCG008932.1, CCG026536.1, CCG003865.1, CCG002897.1, CCG010561.1, CCG026331.1, CCG001423.1, CCG016653.1, CCG022025.2, CCG025636.2, CCG008860.1, CCG018615.3, CCG017201.1, CCG017111.1, CCG025731.1, CCG015276.2, CCG024095.1, CCG022773.2, CCG026099.1, CCG023757.1, CCG024133.1, CCG002231.1, CCG015943.1, CCG016955.1, CCG014174.1, CCG026155.1, CCG003751.1, CCG025897.1, CCG006009.1, CCG003871.1, CCG015567.1, CCG019909.1                                                                  |

|            |                                      |                        |                          |   |                                                                                                                                                                                                                                                                                                                                                                                                                                                                                                                                                                                                                                                                                  |
|------------|--------------------------------------|------------------------|--------------------------|---|----------------------------------------------------------------------------------------------------------------------------------------------------------------------------------------------------------------------------------------------------------------------------------------------------------------------------------------------------------------------------------------------------------------------------------------------------------------------------------------------------------------------------------------------------------------------------------------------------------------------------------------------------------------------------------|
| GO:0016053 | organic acid biosynthetic process    | 47 of 4104 in the list | 91 of 8404 in the genome | 1 | CCG007203. 1, CCG010174. 2, CCG019954. 3, CCG009244. 1, CCG012408. 1, CCG011491. 1, CCG015921. 1, CCG020559. 1, CCG009333. 1, CCG028131. 1, CCG017894. 1, CCG013043. 1, CCG017097. 1, CCG016220. 1, CCG015568. 1, CCG016315. 1, CCG021610. 1, CCG020441. 1, CCG027312. 1, CCG006821. 1, CCG000682. 1, CCG008932. 1, CCG003865. 1, CCG002897. 1, CCG010561. 1, CCG026331. 1, CCG001423. 1, CCG022025. 2, CCG025636. 2, CCG008860. 1, CCG018615. 3, CCG017201. 1, CCG017111. 1, CCG025731. 1, CCG015276. 2, CCG022773. 2, CCG026099. 1, CCG024133. 1, CCG002231. 1, CCG015943. 1, CCG016955. 1, CCG026155. 1, CCG025897. 1, CCG003751. 1, CCG003871. 1, CCG015567. 1, CCG019909. 1 |
| GO:0046394 | carboxylic acid biosynthetic process | 47 of 4104 in the list | 91 of 8404 in the genome | 1 | CCG007203. 1, CCG010174. 2, CCG019954. 3, CCG009244. 1, CCG012408. 1, CCG011491. 1, CCG015921. 1, CCG020559. 1, CCG009333. 1, CCG028131. 1, CCG017894. 1, CCG013043. 1, CCG017097. 1, CCG016220. 1, CCG015568. 1, CCG016315. 1, CCG021610. 1, CCG020441. 1, CCG027312. 1, CCG006821. 1, CCG000682. 1, CCG008932. 1, CCG003865. 1, CCG002897. 1, CCG010561. 1, CCG026331. 1, CCG001423. 1, CCG022025. 2, CCG025636. 2, CCG008860. 1, CCG018615. 3, CCG017201. 1, CCG017111. 1, CCG025731. 1, CCG015276. 2, CCG022773. 2, CCG026099. 1, CCG024133. 1, CCG002231. 1, CCG015943. 1, CCG016955. 1, CCG026155. 1, CCG025897. 1, CCG003751. 1, CCG003871. 1, CCG015567. 1, CCG019909. 1 |
| GO:0006402 | mRNA catabolic process               | 5 of 4104 in the list  | 8 of 8404 in the genome  | 1 | CCG018917. 1, CCG005524. 1, CCG004448. 2, CCG026612. 1, CCG007690. 1                                                                                                                                                                                                                                                                                                                                                                                                                                                                                                                                                                                                             |
| GO:0006476 | protein deacetylation                | 5 of 4104 in the list  | 8 of 8404 in the genome  | 1 | CCG022056. 1, CCG013028. 1, CCG016480. 1, CCG000835. 1, CCG020863. 1                                                                                                                                                                                                                                                                                                                                                                                                                                                                                                                                                                                                             |
| GO:0006665 | sphingolipid metabolic process       | 5 of 4104 in the list  | 8 of 8404 in the genome  | 1 | CCG021085. 1, CCG017994. 1, CCG023779. 1, CCG019082. 1, CCG013509. 1                                                                                                                                                                                                                                                                                                                                                                                                                                                                                                                                                                                                             |
| GO:0007160 | cell-matrix adhesion                 | 5 of 4104 in the list  | 8 of 8404 in the genome  | 1 | CCG004279. 1, CCG020708. 1, CCG000526. 1, CCG008809. 1, CCG002875. 1                                                                                                                                                                                                                                                                                                                                                                                                                                                                                                                                                                                                             |
| GO:0031589 | cell-substrate adhesion              | 5 of 4104 in the list  | 8 of 8404 in the genome  | 1 | CCG004279. 1, CCG020708. 1, CCG000526. 1, CCG008809. 1, CCG002875. 1                                                                                                                                                                                                                                                                                                                                                                                                                                                                                                                                                                                                             |
| GO:0035601 | protein deacylation                  | 5 of 4104 in the list  | 8 of 8404 in the genome  | 1 | CCG022056. 1, CCG013028. 1, CCG016480. 1, CCG000835. 1, CCG020863. 1                                                                                                                                                                                                                                                                                                                                                                                                                                                                                                                                                                                                             |
| GO:0006730 | one-carbon metabolic process         | 6 of 4104 in the list  | 10 of 8404 in the genome | 1 | CCG012781. 1, CCG008960. 1, CCG023355. 1, CCG026511. 1, CCG023354. 1, CCG008959. 2                                                                                                                                                                                                                                                                                                                                                                                                                                                                                                                                                                                               |

|            |                                                     |                       |                          |   |                                                                                                                              |
|------------|-----------------------------------------------------|-----------------------|--------------------------|---|------------------------------------------------------------------------------------------------------------------------------|
| GO:0045892 | negative regulation of transcription, DNA-templated | 6 of 4104 in the list | 10 of 8404 in the genome | 1 | CCG010489. 1, CCG003390. 1, CCG025132. 1, CCG005898. 1, CCG004838. 1, CCG014461. 1                                           |
| GO:0051253 | negative regulation of RNA metabolic process        | 6 of 4104 in the list | 10 of 8404 in the genome | 1 | CCG010489. 1, CCG003390. 1, CCG025132. 1, CCG005898. 1, CCG004838. 1, CCG014461. 1                                           |
| GO:0006720 | isoprenoid metabolic process                        | 7 of 4104 in the list | 12 of 8404 in the genome | 1 | CCG003249. 1, CCG022134. 1, CCG001102. 1, CCG005923. 1, CCG019035. 1, CCG015411. 1, CCG012002. 1                             |
| GO:0008299 | isoprenoid biosynthetic process                     | 7 of 4104 in the list | 12 of 8404 in the genome | 1 | CCG003249. 1, CCG022134. 1, CCG001102. 1, CCG005923. 1, CCG019035. 1, CCG015411. 1, CCG012002. 1                             |
| GO:0009311 | oligosaccharide metabolic process                   | 7 of 4104 in the list | 12 of 8404 in the genome | 1 | CCG019693. 1, CCG011451. 2, CCG014260. 1, CCG022108. 2, CCG019825. 2, CCG024762. 1, CCG013129. 1                             |
| GO:0046112 | nucleobase biosynthetic process                     | 7 of 4104 in the list | 12 of 8404 in the genome | 1 | CCG017175. 1, CCG018108. 1, CCG016614. 1, CCG004257. 1, CCG005938. 1, CCG025940. 1, CCG017331. 1                             |
| GO:0007167 | enzyme linked receptor protein signaling pathway    | 8 of 4104 in the list | 14 of 8404 in the genome | 1 | CCG018533. 1, CCG018494. 1, CCG022929. 1, CCG010631. 1, CCG022741. 1, CCG016307. 1, CCG020978. 1, CCG021354. 1               |
| GO:0019751 | polyol metabolic process                            | 8 of 4104 in the list | 14 of 8404 in the genome | 1 | CCG006358. 1, CCG023757. 1, CCG013318. 1, CCG005177. 1, CCG014174. 1, CCG016653. 1, CCG008317. 1, CCG015587. 1               |
| GO:0022406 | membrane docking                                    | 8 of 4104 in the list | 14 of 8404 in the genome | 1 | CCG002121. 1, CCG016860. 1, CCG016836. 2, CCG002937. 1, CCG000631. 1, CCG005810. 1, CCG016493. 2, CCG023051. 1               |
| GO:0048278 | vesicle docking                                     | 8 of 4104 in the list | 14 of 8404 in the genome | 1 | CCG002121. 1, CCG016860. 1, CCG016836. 2, CCG002937. 1, CCG000631. 1, CCG005810. 1, CCG016493. 2, CCG023051. 1               |
| GO:0003333 | amino acid transmembrane transport                  | 9 of 4104 in the list | 16 of 8404 in the genome | 1 | CCG026667. 1, CCG024222. 1, CCG006348. 1, CCG005768. 1, CCG018073. 1, CCG005769. 1, CCG020840. 1, CCG019407. 1, CCG021349. 1 |
| GO:0006595 | polyamine metabolic process                         | 9 of 4104 in the list | 16 of 8404 in the genome | 1 | CCG022191. 1, CCG027282. 1, CCG009515. 2, CCG002556. 1, CCG028391. 1, CCG002555. 1, CCG016005. 1, CCG002883. 1, CCG002495. 1 |
| GO:0006596 | polyamine biosynthetic process                      | 9 of 4104 in the list | 16 of 8404 in the genome | 1 | CCG022191. 1, CCG027282. 1, CCG009515. 2, CCG002556. 1, CCG028391. 1, CCG002555. 1, CCG016005. 1, CCG002883. 1, CCG002495. 1 |
| GO:0006865 | amino acid transport                                | 9 of 4104 in the list | 16 of 8404 in the genome | 1 | CCG026667. 1, CCG024222. 1, CCG006348. 1, CCG005768. 1, CCG018073. 1, CCG005769. 1, CCG020840. 1, CCG019407. 1, CCG021349. 1 |
| GO:0009309 | amine biosynthetic process                          | 9 of 4104 in the list | 16 of 8404 in the genome | 1 | CCG022191. 1, CCG027282. 1, CCG009515. 2, CCG002556. 1, CCG028391. 1, CCG002555. 1, CCG016005. 1, CCG002883. 1, CCG002495. 1 |
| GO:0016998 | cell wall macromolecule catabolic process           | 9 of 4104 in the list | 16 of 8404 in the genome | 1 | CCG027649. 1, CCG019113. 1, CCG020388. 1, CCG016477. 1, CCG016538. 1, CCG020793. 1, CCG001539. 1, CCG021807. 1, CCG024974. 1 |
| GO:0034637 | cellular carbohydrate biosynthetic process          | 9 of 4104 in the list | 16 of 8404 in the genome | 1 | CCG022430. 1, CCG019693. 1, CCG014174. 1, CCG014260. 1, CCG023757. 1, CCG016653. 1, CCG024762. 1, CCG008130. 1, CCG013129. 1 |
| GO:0042401 | cellular biogenic amine biosynthetic process        | 9 of 4104 in the list | 16 of 8404 in the genome | 1 | CCG022191. 1, CCG027282. 1, CCG009515. 2, CCG002556. 1, CCG028391. 1, CCG002555. 1, CCG016005. 1, CCG002883. 1, CCG002495. 1 |

|            |                                                          |                        |                          |   |                                                                                                                                  |
|------------|----------------------------------------------------------|------------------------|--------------------------|---|----------------------------------------------------------------------------------------------------------------------------------|
| GO:0044036 | cell wall macromolecule metabolic process                | 9 of 4104 in the list  | 16 of 8404 in the genome | 1 | CCG027649.1, CCG019113.1, CCG020388.1, CCG016477.1, CCG016538.1, CCG020793.1, CCG001539.1, CCG021807.1, CCG024974.1              |
| GO:0071554 | cell wall organization or biogenesis                     | 9 of 4104 in the list  | 16 of 8404 in the genome | 1 | CCG027649.1, CCG019113.1, CCG020388.1, CCG016477.1, CCG016538.1, CCG020793.1, CCG001539.1, CCG021807.1, CCG024974.1              |
| GO:0002376 | immune system process                                    | 10 of 4104 in the list | 18 of 8404 in the genome | 1 | CCG027669.1, CCG015967.1, CCG021167.1, CCG027668.1, CCG015966.1, CCG024680.1, CCG001011.2, CCG006124.1, CCG022069.1, CCG027393.1 |
| GO:0006367 | transcription initiation from RNA polymerase II promoter | 10 of 4104 in the list | 18 of 8404 in the genome | 1 | CCG000158.1, CCG017812.1, CCG020044.1, CCG001292.1, CCG011083.1, CCG020129.1, CCG020460.1, CCG025691.1, CCG010175.1, CCG023184.1 |
| GO:0006952 | defense response                                         | 10 of 4104 in the list | 18 of 8404 in the genome | 1 | CCG027669.1, CCG015967.1, CCG026732.1, CCG008821.1, CCG005170.1, CCG024173.1, CCG003252.1, CCG027668.1, CCG015966.1, CCG006124.1 |
| GO:0006955 | immune response                                          | 10 of 4104 in the list | 18 of 8404 in the genome | 1 | CCG027669.1, CCG015967.1, CCG021167.1, CCG027668.1, CCG015966.1, CCG024680.1, CCG001011.2, CCG006124.1, CCG022069.1, CCG027393.1 |
| GO:0018193 | peptidyl-amino acid modification                         | 10 of 4104 in the list | 18 of 8404 in the genome | 1 | CCG008932.1, CCG022589.1, CCG008609.1, CCG018536.1, CCG004091.1, CCG009764.1, CCG013043.1, CCG019367.2, CCG026155.1, CCG013914.1 |

|            |                                              |                        |                           |   |                                                                                                                                                                                                                                                                                                                                                                                                                                                                                                                                                                                                                                                                                                                                                                                                                                                                                                                                                                                                                                                                                                                                                                                                                                                                                                                                                                                  |
|------------|----------------------------------------------|------------------------|---------------------------|---|----------------------------------------------------------------------------------------------------------------------------------------------------------------------------------------------------------------------------------------------------------------------------------------------------------------------------------------------------------------------------------------------------------------------------------------------------------------------------------------------------------------------------------------------------------------------------------------------------------------------------------------------------------------------------------------------------------------------------------------------------------------------------------------------------------------------------------------------------------------------------------------------------------------------------------------------------------------------------------------------------------------------------------------------------------------------------------------------------------------------------------------------------------------------------------------------------------------------------------------------------------------------------------------------------------------------------------------------------------------------------------|
| GO:0072521 | purine-containing compound metabolic process | 95 of 4104 in the list | 189 of 8404 in the genome | 1 | CCG006420. 1, CCG017420. 1, CCG002549. 1, CCG017693. 1, CCG007060. 1, CCG013000. 1, CCG017331. 1, CCG004309. 1, CCG006529. 1, CCG025989. 2, CCG024327. 1, CCG015386. 1, CCG019020. 1, CCG009243. 1, CCG008422. 1, CCG010112. 1, CCG009607. 1, CCG011006. 1, CCG007827. 1, CCG014434. 1, CCG013643. 1, CCG006421. 1, CCG023963. 3, CCG002038. 1, CCG025027. 1, CCG016370. 1, CCG000148. 1, CCG019103. 1, CCG013365. 1, CCG019629. 2, CCG002917. 1, CCG006486. 1, CCG005924. 2, CCG020909. 1, CCG007532. 1, CCG004257. 1, CCG018447. 1, CCG017330. 1, CCG007531. 1, CCG016966. 1, CCG018820. 3, CCG021110. 1, CCG025179. 1, CCG021934. 1, CCG006777. 1, CCG004308. 1, CCG025973. 1, CCG017995. 1, CCG013637. 1, CCG023640. 1, CCG026314. 1, CCG010418. 1, CCG025348. 1, CCG026852. 1, CCG009080. 1, CCG004869. 1, CCG019619. 1, CCG025396. 1, CCG013999. 1, CCG026953. 1, CCG021336. 1, CCG006924. 1, CCG007417. 1, CCG021220. 1, CCG001066. 1, CCG019866. 1, CCG019678. 1, CCG007724. 1, CCG008748. 1, CCG013641. 1, CCG015410. 1, CCG016027. 1, CCG015289. 1, CCG025107. 1, CCG003495. 1, CCG021411. 1, CCG009142. 1, CCG026898. 1, CCG001859. 1, CCG026812. 1, CCG026336. 1, CCG005886. 1, CCG025131. 2, CCG016542. 1, CCG026154. 1, CCG015654. 1, CCG018659. 2, CCG002852. 1, CCG010864. 1, CCG028305. 1, CCG006791. 1, CCG016955. 1, CCG021152. 1, CCG023526. 2, CCG001285. 1 |
| GO:0006152 | purine nucleoside catabolic process          | 54 of 4104 in the list | 107 of 8404 in the genome | 1 | CCG006420. 1, CCG017420. 1, CCG002549. 1, CCG025973. 1, CCG007060. 1, CCG013000. 1, CCG013637. 1, CCG010418. 1, CCG004869. 1, CCG024327. 1, CCG009080. 1, CCG015386. 1, CCG019020. 1, CCG009243. 1, CCG025396. 1, CCG026953. 1, CCG006924. 1, CCG021220. 1, CCG009607. 1, CCG011006. 1, CCG008748. 1, CCG007827. 1, CCG014434. 1, CCG006421. 1, CCG023963. 3, CCG013641. 1, CCG016027. 1, CCG015289. 1, CCG025027. 1, CCG021411. 1, CCG003495. 1, CCG001859. 1, CCG026336. 1, CCG016370. 1, CCG019103. 1, CCG005886. 1, CCG019629. 2, CCG002917. 1, CCG025131. 2, CCG016542. 1, CCG026154. 1, CCG015654. 1, CCG002852. 1, CCG010864. 1, CCG020909. 1, CCG007532. 1, CCG007531. 1, CCG018447. 1, CCG016966. 1, CCG018820. 3, CCG021152. 1, CCG023526. 2, CCG025179. 1, CCG006777. 1                                                                                                                                                                                                                                                                                                                                                                                                                                                                                                                                                                                               |

|            |                                           |                        |                           |   |                                                                                                                                                                                                                                                                                                                                                                                                                                                                                                                                                                                                                                                                                                                                                                                    |
|------------|-------------------------------------------|------------------------|---------------------------|---|------------------------------------------------------------------------------------------------------------------------------------------------------------------------------------------------------------------------------------------------------------------------------------------------------------------------------------------------------------------------------------------------------------------------------------------------------------------------------------------------------------------------------------------------------------------------------------------------------------------------------------------------------------------------------------------------------------------------------------------------------------------------------------|
| GO:0006184 | GTP catabolic process                     | 54 of 4104 in the list | 107 of 8404 in the genome | 1 | CCG006420. 1, CCG017420. 1, CCG002549. 1, CCG025973. 1, CCG007060. 1, CCG013000. 1, CCG013637. 1, CCG010418. 1, CCG004869. 1, CCG024327. 1, CCG009080. 1, CCG015386. 1, CCG019020. 1, CCG009243. 1, CCG025396. 1, CCG026953. 1, CCG006924. 1, CCG021220. 1, CCG009607. 1, CCG011006. 1, CCG008748. 1, CCG007827. 1, CCG014434. 1, CCG006421. 1, CCG023963. 3, CCG013641. 1, CCG016027. 1, CCG015289. 1, CCG025027. 1, CCG021411. 1, CCG003495. 1, CCG001859. 1, CCG026336. 1, CCG016370. 1, CCG019103. 1, CCG005886. 1, CCG019629. 2, CCG002917. 1, CCG025131. 2, CCG016542. 1, CCG026154. 1, CCG015654. 1, CCG002852. 1, CCG010864. 1, CCG020909. 1, CCG007532. 1, CCG007531. 1, CCG018447. 1, CCG016966. 1, CCG018820. 3, CCG021152. 1, CCG023526. 2, CCG025179. 1, CCG006777. 1 |
| GO:0006195 | purine nucleotide catabolic process       | 54 of 4104 in the list | 107 of 8404 in the genome | 1 | CCG006420. 1, CCG017420. 1, CCG002549. 1, CCG025973. 1, CCG007060. 1, CCG013000. 1, CCG013637. 1, CCG010418. 1, CCG004869. 1, CCG024327. 1, CCG009080. 1, CCG015386. 1, CCG019020. 1, CCG009243. 1, CCG025396. 1, CCG026953. 1, CCG006924. 1, CCG021220. 1, CCG009607. 1, CCG011006. 1, CCG008748. 1, CCG007827. 1, CCG014434. 1, CCG006421. 1, CCG023963. 3, CCG013641. 1, CCG016027. 1, CCG015289. 1, CCG025027. 1, CCG021411. 1, CCG003495. 1, CCG001859. 1, CCG026336. 1, CCG016370. 1, CCG019103. 1, CCG005886. 1, CCG019629. 2, CCG002917. 1, CCG025131. 2, CCG016542. 1, CCG026154. 1, CCG015654. 1, CCG002852. 1, CCG010864. 1, CCG020909. 1, CCG007532. 1, CCG007531. 1, CCG018447. 1, CCG016966. 1, CCG018820. 3, CCG021152. 1, CCG023526. 2, CCG025179. 1, CCG006777. 1 |
| GO:0009143 | nucleoside triphosphate catabolic process | 54 of 4104 in the list | 107 of 8404 in the genome | 1 | CCG006420. 1, CCG017420. 1, CCG002549. 1, CCG025973. 1, CCG007060. 1, CCG013000. 1, CCG013637. 1, CCG010418. 1, CCG004869. 1, CCG024327. 1, CCG009080. 1, CCG015386. 1, CCG019020. 1, CCG009243. 1, CCG025396. 1, CCG026953. 1, CCG006924. 1, CCG021220. 1, CCG009607. 1, CCG011006. 1, CCG008748. 1, CCG007827. 1, CCG014434. 1, CCG006421. 1, CCG023963. 3, CCG013641. 1, CCG016027. 1, CCG015289. 1, CCG025027. 1, CCG021411. 1, CCG003495. 1, CCG001859. 1, CCG026336. 1, CCG016370. 1, CCG019103. 1, CCG005886. 1, CCG019629. 2, CCG002917. 1, CCG025131. 2, CCG016542. 1, CCG026154. 1, CCG015654. 1, CCG002852. 1, CCG010864. 1, CCG020909. 1, CCG007532. 1, CCG007531. 1, CCG018447. 1, CCG016966. 1, CCG018820. 3, CCG021152. 1, CCG023526. 2, CCG025179. 1, CCG006777. 1 |

|            |                                                  |                        |                           |   |                                                                                                                                                                                                                                                                                                                                                                                                                                                                                                                                                                                                                                                                                                                                                                                    |
|------------|--------------------------------------------------|------------------------|---------------------------|---|------------------------------------------------------------------------------------------------------------------------------------------------------------------------------------------------------------------------------------------------------------------------------------------------------------------------------------------------------------------------------------------------------------------------------------------------------------------------------------------------------------------------------------------------------------------------------------------------------------------------------------------------------------------------------------------------------------------------------------------------------------------------------------|
| GO:0009146 | purine nucleoside triphosphate catabolic process | 54 of 4104 in the list | 107 of 8404 in the genome | 1 | CCG006420. 1, CCG017420. 1, CCG002549. 1, CCG025973. 1, CCG007060. 1, CCG013000. 1, CCG013637. 1, CCG010418. 1, CCG004869. 1, CCG024327. 1, CCG009080. 1, CCG015386. 1, CCG019020. 1, CCG009243. 1, CCG025396. 1, CCG026953. 1, CCG006924. 1, CCG021220. 1, CCG009607. 1, CCG011006. 1, CCG008748. 1, CCG007827. 1, CCG014434. 1, CCG006421. 1, CCG023963. 3, CCG013641. 1, CCG016027. 1, CCG015289. 1, CCG025027. 1, CCG021411. 1, CCG003495. 1, CCG001859. 1, CCG026336. 1, CCG016370. 1, CCG019103. 1, CCG005886. 1, CCG019629. 2, CCG002917. 1, CCG025131. 2, CCG016542. 1, CCG026154. 1, CCG015654. 1, CCG002852. 1, CCG010864. 1, CCG020909. 1, CCG007532. 1, CCG007531. 1, CCG018447. 1, CCG016966. 1, CCG018820. 3, CCG021152. 1, CCG023526. 2, CCG025179. 1, CCG006777. 1 |
| GO:0009154 | purine ribonucleotide catabolic process          | 54 of 4104 in the list | 107 of 8404 in the genome | 1 | CCG006420. 1, CCG017420. 1, CCG002549. 1, CCG025973. 1, CCG007060. 1, CCG013000. 1, CCG013637. 1, CCG010418. 1, CCG004869. 1, CCG024327. 1, CCG009080. 1, CCG015386. 1, CCG019020. 1, CCG009243. 1, CCG025396. 1, CCG026953. 1, CCG006924. 1, CCG021220. 1, CCG009607. 1, CCG011006. 1, CCG008748. 1, CCG007827. 1, CCG014434. 1, CCG006421. 1, CCG023963. 3, CCG013641. 1, CCG016027. 1, CCG015289. 1, CCG025027. 1, CCG021411. 1, CCG003495. 1, CCG001859. 1, CCG026336. 1, CCG016370. 1, CCG019103. 1, CCG005886. 1, CCG019629. 2, CCG002917. 1, CCG025131. 2, CCG016542. 1, CCG026154. 1, CCG015654. 1, CCG002852. 1, CCG010864. 1, CCG020909. 1, CCG007532. 1, CCG007531. 1, CCG018447. 1, CCG016966. 1, CCG018820. 3, CCG021152. 1, CCG023526. 2, CCG025179. 1, CCG006777. 1 |
| GO:0009164 | nucleoside catabolic process                     | 54 of 4104 in the list | 107 of 8404 in the genome | 1 | CCG006420. 1, CCG017420. 1, CCG002549. 1, CCG025973. 1, CCG007060. 1, CCG013000. 1, CCG013637. 1, CCG010418. 1, CCG004869. 1, CCG024327. 1, CCG009080. 1, CCG015386. 1, CCG019020. 1, CCG009243. 1, CCG025396. 1, CCG026953. 1, CCG006924. 1, CCG021220. 1, CCG009607. 1, CCG011006. 1, CCG008748. 1, CCG007827. 1, CCG014434. 1, CCG006421. 1, CCG023963. 3, CCG013641. 1, CCG016027. 1, CCG015289. 1, CCG025027. 1, CCG021411. 1, CCG003495. 1, CCG001859. 1, CCG026336. 1, CCG016370. 1, CCG019103. 1, CCG005886. 1, CCG019629. 2, CCG002917. 1, CCG025131. 2, CCG016542. 1, CCG026154. 1, CCG015654. 1, CCG002852. 1, CCG010864. 1, CCG020909. 1, CCG007532. 1, CCG007531. 1, CCG018447. 1, CCG016966. 1, CCG018820. 3, CCG021152. 1, CCG023526. 2, CCG025179. 1, CCG006777. 1 |

|            |                                                      |                        |                           |   |                                                                                                                                                                                                                                                                                                                                                                                                                                                                                                                                                                                                                                                                                                                                                                                    |
|------------|------------------------------------------------------|------------------------|---------------------------|---|------------------------------------------------------------------------------------------------------------------------------------------------------------------------------------------------------------------------------------------------------------------------------------------------------------------------------------------------------------------------------------------------------------------------------------------------------------------------------------------------------------------------------------------------------------------------------------------------------------------------------------------------------------------------------------------------------------------------------------------------------------------------------------|
| GO:0009203 | ribonucleoside triphosphate catabolic process        | 54 of 4104 in the list | 107 of 8404 in the genome | 1 | CCG006420. 1, CCG017420. 1, CCG002549. 1, CCG025973. 1, CCG007060. 1, CCG013000. 1, CCG013637. 1, CCG010418. 1, CCG004869. 1, CCG024327. 1, CCG009080. 1, CCG015386. 1, CCG019020. 1, CCG009243. 1, CCG025396. 1, CCG026953. 1, CCG006924. 1, CCG021220. 1, CCG009607. 1, CCG011006. 1, CCG008748. 1, CCG007827. 1, CCG014434. 1, CCG006421. 1, CCG023963. 3, CCG013641. 1, CCG016027. 1, CCG015289. 1, CCG025027. 1, CCG021411. 1, CCG003495. 1, CCG001859. 1, CCG026336. 1, CCG016370. 1, CCG019103. 1, CCG005886. 1, CCG019629. 2, CCG002917. 1, CCG025131. 2, CCG016542. 1, CCG026154. 1, CCG015654. 1, CCG002852. 1, CCG010864. 1, CCG020909. 1, CCG007532. 1, CCG007531. 1, CCG018447. 1, CCG016966. 1, CCG018820. 3, CCG021152. 1, CCG023526. 2, CCG025179. 1, CCG006777. 1 |
| GO:0009207 | purine ribonucleoside triphosphate catabolic process | 54 of 4104 in the list | 107 of 8404 in the genome | 1 | CCG006420. 1, CCG017420. 1, CCG002549. 1, CCG025973. 1, CCG007060. 1, CCG013000. 1, CCG013637. 1, CCG010418. 1, CCG004869. 1, CCG024327. 1, CCG009080. 1, CCG015386. 1, CCG019020. 1, CCG009243. 1, CCG025396. 1, CCG026953. 1, CCG006924. 1, CCG021220. 1, CCG009607. 1, CCG011006. 1, CCG008748. 1, CCG007827. 1, CCG014434. 1, CCG006421. 1, CCG023963. 3, CCG013641. 1, CCG016027. 1, CCG015289. 1, CCG025027. 1, CCG021411. 1, CCG003495. 1, CCG001859. 1, CCG026336. 1, CCG016370. 1, CCG019103. 1, CCG005886. 1, CCG019629. 2, CCG002917. 1, CCG025131. 2, CCG016542. 1, CCG026154. 1, CCG015654. 1, CCG002852. 1, CCG010864. 1, CCG020909. 1, CCG007532. 1, CCG007531. 1, CCG018447. 1, CCG016966. 1, CCG018820. 3, CCG021152. 1, CCG023526. 2, CCG025179. 1, CCG006777. 1 |
| GO:0009261 | ribonucleotide catabolic process                     | 54 of 4104 in the list | 107 of 8404 in the genome | 1 | CCG006420. 1, CCG017420. 1, CCG002549. 1, CCG025973. 1, CCG007060. 1, CCG013000. 1, CCG013637. 1, CCG010418. 1, CCG004869. 1, CCG024327. 1, CCG009080. 1, CCG015386. 1, CCG019020. 1, CCG009243. 1, CCG025396. 1, CCG026953. 1, CCG006924. 1, CCG021220. 1, CCG009607. 1, CCG011006. 1, CCG008748. 1, CCG007827. 1, CCG014434. 1, CCG006421. 1, CCG023963. 3, CCG013641. 1, CCG016027. 1, CCG015289. 1, CCG025027. 1, CCG021411. 1, CCG003495. 1, CCG001859. 1, CCG026336. 1, CCG016370. 1, CCG019103. 1, CCG005886. 1, CCG019629. 2, CCG002917. 1, CCG025131. 2, CCG016542. 1, CCG026154. 1, CCG015654. 1, CCG002852. 1, CCG010864. 1, CCG020909. 1, CCG007532. 1, CCG007531. 1, CCG018447. 1, CCG016966. 1, CCG018820. 3, CCG021152. 1, CCG023526. 2, CCG025179. 1, CCG006777. 1 |



|            |                                              |                        |                           |   |                                                                                                                                                                                                                                                                                                                                                                                                                                                                                                                                                                                                                                                                                                                                                                                    |
|------------|----------------------------------------------|------------------------|---------------------------|---|------------------------------------------------------------------------------------------------------------------------------------------------------------------------------------------------------------------------------------------------------------------------------------------------------------------------------------------------------------------------------------------------------------------------------------------------------------------------------------------------------------------------------------------------------------------------------------------------------------------------------------------------------------------------------------------------------------------------------------------------------------------------------------|
| GO:0042454 | ribonucleoside catabolic process             | 54 of 4104 in the list | 107 of 8404 in the genome | 1 | CCG006420. 1, CCG017420. 1, CCG002549. 1, CCG025973. 1, CCG007060. 1, CCG013000. 1, CCG013637. 1, CCG010418. 1, CCG004869. 1, CCG024327. 1, CCG009080. 1, CCG015386. 1, CCG019020. 1, CCG009243. 1, CCG025396. 1, CCG026953. 1, CCG006924. 1, CCG021220. 1, CCG009607. 1, CCG011006. 1, CCG008748. 1, CCG007827. 1, CCG014434. 1, CCG006421. 1, CCG023963. 3, CCG013641. 1, CCG016027. 1, CCG015289. 1, CCG025027. 1, CCG021411. 1, CCG003495. 1, CCG001859. 1, CCG026336. 1, CCG016370. 1, CCG019103. 1, CCG005886. 1, CCG019629. 2, CCG002917. 1, CCG025131. 2, CCG016542. 1, CCG026154. 1, CCG015654. 1, CCG002852. 1, CCG010864. 1, CCG020909. 1, CCG007532. 1, CCG007531. 1, CCG018447. 1, CCG016966. 1, CCG018820. 3, CCG021152. 1, CCG023526. 2, CCG025179. 1, CCG006777. 1 |
| GO:0046130 | purine ribonucleoside catabolic process      | 54 of 4104 in the list | 107 of 8404 in the genome | 1 | CCG006420. 1, CCG017420. 1, CCG002549. 1, CCG025973. 1, CCG007060. 1, CCG013000. 1, CCG013637. 1, CCG010418. 1, CCG004869. 1, CCG024327. 1, CCG009080. 1, CCG015386. 1, CCG019020. 1, CCG009243. 1, CCG025396. 1, CCG026953. 1, CCG006924. 1, CCG021220. 1, CCG009607. 1, CCG011006. 1, CCG008748. 1, CCG007827. 1, CCG014434. 1, CCG006421. 1, CCG023963. 3, CCG013641. 1, CCG016027. 1, CCG015289. 1, CCG025027. 1, CCG021411. 1, CCG003495. 1, CCG001859. 1, CCG026336. 1, CCG016370. 1, CCG019103. 1, CCG005886. 1, CCG019629. 2, CCG002917. 1, CCG025131. 2, CCG016542. 1, CCG026154. 1, CCG015654. 1, CCG002852. 1, CCG010864. 1, CCG020909. 1, CCG007532. 1, CCG007531. 1, CCG018447. 1, CCG016966. 1, CCG018820. 3, CCG021152. 1, CCG023526. 2, CCG025179. 1, CCG006777. 1 |
| GO:0072523 | purine-containing compound catabolic process | 54 of 4104 in the list | 107 of 8404 in the genome | 1 | CCG006420. 1, CCG017420. 1, CCG002549. 1, CCG025973. 1, CCG007060. 1, CCG013000. 1, CCG013637. 1, CCG010418. 1, CCG004869. 1, CCG024327. 1, CCG009080. 1, CCG015386. 1, CCG019020. 1, CCG009243. 1, CCG025396. 1, CCG026953. 1, CCG006924. 1, CCG021220. 1, CCG009607. 1, CCG011006. 1, CCG008748. 1, CCG007827. 1, CCG014434. 1, CCG006421. 1, CCG023963. 3, CCG013641. 1, CCG016027. 1, CCG015289. 1, CCG025027. 1, CCG021411. 1, CCG003495. 1, CCG001859. 1, CCG026336. 1, CCG016370. 1, CCG019103. 1, CCG005886. 1, CCG019629. 2, CCG002917. 1, CCG025131. 2, CCG016542. 1, CCG026154. 1, CCG015654. 1, CCG002852. 1, CCG010864. 1, CCG020909. 1, CCG007532. 1, CCG007531. 1, CCG018447. 1, CCG016966. 1, CCG018820. 3, CCG021152. 1, CCG023526. 2, CCG025179. 1, CCG006777. 1 |

|            |                                                 |                        |                           |   |                                                                                                                                                                                                                                                                                                                                                                                                                                                                                                                                                                                                                                                                                                                                                                                    |
|------------|-------------------------------------------------|------------------------|---------------------------|---|------------------------------------------------------------------------------------------------------------------------------------------------------------------------------------------------------------------------------------------------------------------------------------------------------------------------------------------------------------------------------------------------------------------------------------------------------------------------------------------------------------------------------------------------------------------------------------------------------------------------------------------------------------------------------------------------------------------------------------------------------------------------------------|
| GO:1901069 | guanosine-containing compound catabolic process | 54 of 4104 in the list | 107 of 8404 in the genome | 1 | CCG006420. 1, CCG017420. 1, CCG002549. 1, CCG025973. 1, CCG007060. 1, CCG013000. 1, CCG013637. 1, CCG010418. 1, CCG004869. 1, CCG024327. 1, CCG009080. 1, CCG015386. 1, CCG019020. 1, CCG009243. 1, CCG025396. 1, CCG026953. 1, CCG006924. 1, CCG021220. 1, CCG009607. 1, CCG011006. 1, CCG008748. 1, CCG007827. 1, CCG014434. 1, CCG006421. 1, CCG023963. 3, CCG013641. 1, CCG016027. 1, CCG015289. 1, CCG025027. 1, CCG021411. 1, CCG003495. 1, CCG001859. 1, CCG026336. 1, CCG016370. 1, CCG019103. 1, CCG005886. 1, CCG019629. 2, CCG002917. 1, CCG025131. 2, CCG016542. 1, CCG026154. 1, CCG015654. 1, CCG002852. 1, CCG010864. 1, CCG020909. 1, CCG007532. 1, CCG007531. 1, CCG018447. 1, CCG016966. 1, CCG018820. 3, CCG021152. 1, CCG023526. 2, CCG025179. 1, CCG006777. 1 |
| GO:1901658 | glycosyl compound catabolic process             | 54 of 4104 in the list | 107 of 8404 in the genome | 1 | CCG006420. 1, CCG017420. 1, CCG002549. 1, CCG025973. 1, CCG007060. 1, CCG013000. 1, CCG013637. 1, CCG010418. 1, CCG004869. 1, CCG024327. 1, CCG009080. 1, CCG015386. 1, CCG019020. 1, CCG009243. 1, CCG025396. 1, CCG026953. 1, CCG006924. 1, CCG021220. 1, CCG009607. 1, CCG011006. 1, CCG008748. 1, CCG007827. 1, CCG014434. 1, CCG006421. 1, CCG023963. 3, CCG013641. 1, CCG016027. 1, CCG015289. 1, CCG025027. 1, CCG021411. 1, CCG003495. 1, CCG001859. 1, CCG026336. 1, CCG016370. 1, CCG019103. 1, CCG005886. 1, CCG019629. 2, CCG002917. 1, CCG025131. 2, CCG016542. 1, CCG026154. 1, CCG015654. 1, CCG002852. 1, CCG010864. 1, CCG020909. 1, CCG007532. 1, CCG007531. 1, CCG018447. 1, CCG016966. 1, CCG018820. 3, CCG021152. 1, CCG023526. 2, CCG025179. 1, CCG006777. 1 |
| GO:0006352 | DNA-templated transcription, initiation         | 30 of 4104 in the list | 59 of 8404 in the genome  | 1 | CCG024624. 1, CCG000158. 1, CCG009894. 1, CCG017812. 1, CCG021940. 1, CCG006686. 1, CCG006211. 1, CCG020044. 1, CCG016968. 1, CCG027197. 1, CCG021944. 1, CCG018168. 1, CCG010138. 1, CCG010647. 1, CCG018719. 1, CCG025691. 1, CCG009805. 2, CCG010175. 1, CCG004151. 1, CCG018164. 1, CCG018326. 1, CCG027950. 1, CCG026473. 1, CCG001292. 1, CCG011083. 1, CCG020129. 1, CCG020460. 1, CCG021521. 1, CCG010650. 1, CCG023184. 1                                                                                                                                                                                                                                                                                                                                                 |

|            |                            |                         |                           |   |                                                                                                                                                                                                                                                                                                                                                                                                                                                                                                                                                                                                                                                                                                                                                                                                                                                                                                                                                                                                                                                                                                                                                                                                                                                                                                                                                                                                                                                                                                                                                                                                                                                                                                                                                                                                                                                                                                                                                                   |
|------------|----------------------------|-------------------------|---------------------------|---|-------------------------------------------------------------------------------------------------------------------------------------------------------------------------------------------------------------------------------------------------------------------------------------------------------------------------------------------------------------------------------------------------------------------------------------------------------------------------------------------------------------------------------------------------------------------------------------------------------------------------------------------------------------------------------------------------------------------------------------------------------------------------------------------------------------------------------------------------------------------------------------------------------------------------------------------------------------------------------------------------------------------------------------------------------------------------------------------------------------------------------------------------------------------------------------------------------------------------------------------------------------------------------------------------------------------------------------------------------------------------------------------------------------------------------------------------------------------------------------------------------------------------------------------------------------------------------------------------------------------------------------------------------------------------------------------------------------------------------------------------------------------------------------------------------------------------------------------------------------------------------------------------------------------------------------------------------------------|
| GO:0044248 | cellular catabolic process | 160 of 4104 in the list | 324 of 8404 in the genome | 1 | CCG006420. 1, CCG017420. 1, CCG002549. 1, CCG027068. 1, CCG013000. 1, CCG013766. 1, CCG024327. 1, CCG015386. 1, CCG019020. 1, CCG003288. 1, CCG025108. 1, CCG020685. 1, CCG022635. 1, CCG006391. 1, CCG002925. 1, CCG019834. 1, CCG023005. 1, CCG024375. 1, CCG009607. 1, CCG011006. 1, CCG001539. 1, CCG027119. 1, CCG004448. 2, CCG012828. 1, CCG019113. 1, CCG025521. 1, CCG016370. 1, CCG028595. 1, CCG026413. 3, CCG006311. 1, CCG005441. 1, CCG002917. 1, CCG002974. 1, CCG013876. 1, CCG002139. 1, CCG011722. 1, CCG003063. 1, CCG008217. 1, CCG009424. 1, CCG011238. 1, CCG019571. 1, CCG010879. 1, CCG020154. 1, CCG002366. 1, CCG004869. 1, CCG009080. 1, CCG001877. 1, CCG007690. 1, CCG004331. 1, CCG025396. 1, CCG026953. 1, CCG008969. 2, CCG011721. 1, CCG006924. 1, CCG021220. 1, CCG008510. 1, CCG013832. 1, CCG017543. 1, CCG013641. 1, CCG015289. 1, CCG003495. 1, CCG021411. 1, CCG001859. 1, CCG001769. 1, CCG027283. 1, CCG009582. 1, CCG025131. 2, CCG021807. 1, CCG002852. 1, CCG011789. 1, CCG022742. 2, CCG002231. 1, CCG000834. 1, CCG027763. 1, CCG007362. 1, CCG021152. 1, CCG023526. 2, CCG026612. 1, CCG008388. 1, CCG003060. 1, CCG007060. 1, CCG007080. 1, CCG001704. 1, CCG005524. 1, CCG001350. 1, CCG010111. 1, CCG019599. 1, CCG024974. 1, CCG000591. 1, CCG009243. 1, CCG012628. 1, CCG016477. 1, CCG007827. 1, CCG023963. 3, CCG006421. 1, CCG014434. 1, CCG021825. 3, CCG021990. 1, CCG013093. 1, CCG027000. 1, CCG025027. 1, CCG001101. 1, CCG003809. 1, CCG020388. 1, CCG020793. 1, CCG003858. 1, CCG019103. 1, CCG026999. 1, CCG019629. 2, CCG005147. 1, CCG004988. 1, CCG023684. 1, CCG027649. 1, CCG001082. 1, CCG020909. 1, CCG007532. 1, CCG014222. 1, CCG007531. 1, CCG018447. 1, CCG016966. 1, CCG027945. 1, CCG023270. 1, CCG001217. 1, CCG014393. 1, CCG019674. 1, CCG018820. 3, CCG025179. 1, CCG004134. 1, CCG006777. 1, CCG007203. 1, CCG005241. 1, CCG025973. 1, CCG017376. 1, CCG019394. 1, CCG013637. 1, |
| GO:0006836 | neurotransmitter transport | 18 of 4104 in the list  | 35 of 8404 in the genome  | 1 | CCG005140. 1, CCG012096. 1, CCG010710. 1, CCG026799. 1, CCG023060. 1, CCG010711. 1, CCG023980. 1, CCG027718. 1, CCG016128. 1, CCG026151. 1, CCG028141. 1, CCG016245. 1, CCG009022. 2, CCG017641. 1, CCG022789. 1, CCG008323. 1, CCG017552. 1, CCG025323. 1                                                                                                                                                                                                                                                                                                                                                                                                                                                                                                                                                                                                                                                                                                                                                                                                                                                                                                                                                                                                                                                                                                                                                                                                                                                                                                                                                                                                                                                                                                                                                                                                                                                                                                        |

|            |                                                              |                        |                          |   |                                                                                                                                                                        |
|------------|--------------------------------------------------------------|------------------------|--------------------------|---|------------------------------------------------------------------------------------------------------------------------------------------------------------------------|
| GO:0009308 | amine metabolic process                                      | 12 of 4104 in the list | 23 of 8404 in the genome | 1 | CCG022191. 1, CCG012875. 1, CCG027282. 1, CCG003865. 1, CCG009515. 2, CCG002556. 1, CCG028391. 1, CCG002555. 1, CCG016005. 1, CCG006059. 1, CCG002883. 1, CCG002495. 1 |
| GO:0032446 | protein modification by small protein conjugation            | 12 of 4104 in the list | 23 of 8404 in the genome | 1 | CCG016189. 1, CCG019139. 1, CCG003060. 1, CCG010433. 1, CCG020757. 1, CCG008557. 1, CCG013109. 1, CCG006505. 1, CCG020230. 3, CCG016294. 1, CCG022370. 1, CCG007809. 1 |
| GO:0044106 | cellular amine metabolic process                             | 12 of 4104 in the list | 23 of 8404 in the genome | 1 | CCG022191. 1, CCG012875. 1, CCG027282. 1, CCG003865. 1, CCG009515. 2, CCG002556. 1, CCG028391. 1, CCG002555. 1, CCG016005. 1, CCG006059. 1, CCG002883. 1, CCG002495. 1 |
| GO:0070647 | protein modification by small protein conjugation or removal | 12 of 4104 in the list | 23 of 8404 in the genome | 1 | CCG016189. 1, CCG019139. 1, CCG003060. 1, CCG010433. 1, CCG020757. 1, CCG008557. 1, CCG013109. 1, CCG006505. 1, CCG020230. 3, CCG016294. 1, CCG022370. 1, CCG007809. 1 |
| GO:0006576 | cellular biogenic amine metabolic process                    | 11 of 4104 in the list | 21 of 8404 in the genome | 1 | CCG022191. 1, CCG012875. 1, CCG027282. 1, CCG009515. 2, CCG002556. 1, CCG028391. 1, CCG002555. 1, CCG016005. 1, CCG006059. 1, CCG002883. 1, CCG002495. 1               |
| GO:0006414 | translational elongation                                     | 9 of 4104 in the list  | 17 of 8404 in the genome | 1 | CCG014531. 2, CCG005143. 1, CCG026280. 1, CCG025409. 1, CCG026155. 1, CCG003684. 1, CCG000994. 1, CCG027751. 1, CCG016511. 1                                           |
| GO:0006544 | glycine metabolic process                                    | 9 of 4104 in the list  | 17 of 8404 in the genome | 1 | CCG025108. 1, CCG001082. 1, CCG028131. 1, CCG008510. 1, CCG010111. 1, CCG019834. 1, CCG003063. 1, CCG020154. 1, CCG008388. 1                                           |
| GO:0044272 | sulfur compound biosynthetic process                         | 9 of 4104 in the list  | 17 of 8404 in the genome | 1 | CCG002897. 1, CCG003865. 1, CCG026099. 1, CCG016955. 1, CCG015568. 1, CCG003751. 1, CCG015567. 1, CCG010319. 1, CCG025636. 2                                           |
| GO:0033013 | tetrapyrrole metabolic process                               | 8 of 4104 in the list  | 15 of 8404 in the genome | 1 | CCG007610. 1, CCG027212. 1, CCG018453. 1, CCG008609. 1, CCG026752. 1, CCG021335. 1, CCG009424. 1, CCG005053. 1                                                         |
| GO:0042558 | pteridine-containing compound metabolic process              | 8 of 4104 in the list  | 15 of 8404 in the genome | 1 | CCG000682. 1, CCG003173. 1, CCG010561. 1, CCG015943. 1, CCG023780. 2, CCG011491. 1, CCG021086. 2, CCG020441. 1                                                         |
| GO:0042559 | pteridine-containing compound biosynthetic process           | 8 of 4104 in the list  | 15 of 8404 in the genome | 1 | CCG000682. 1, CCG003173. 1, CCG010561. 1, CCG015943. 1, CCG023780. 2, CCG011491. 1, CCG021086. 2, CCG020441. 1                                                         |
| GO:0051128 | regulation of cellular component organization                | 8 of 4104 in the list  | 15 of 8404 in the genome | 1 | CCG028308. 1, CCG004331. 1, CCG027068. 1, CCG025026. 1, CCG026155. 1, CCG002269. 1, CCG019102. 1, CCG018116. 1                                                         |
| GO:0033014 | tetrapyrrole biosynthetic process                            | 7 of 4104 in the list  | 13 of 8404 in the genome | 1 | CCG007610. 1, CCG027212. 1, CCG018453. 1, CCG008609. 1, CCG026752. 1, CCG021335. 1, CCG005053. 1                                                                       |
| GO:0043648 | dicarboxylic acid metabolic process                          | 7 of 4104 in the list  | 13 of 8404 in the genome | 1 | CCG018290. 1, CCG007203. 1, CCG019111. 1, CCG013063. 1, CCG002231. 1, CCG019112. 1, CCG018289. 1                                                                       |
| GO:0010629 | negative regulation of gene expression                       | 6 of 4104 in the list  | 11 of 8404 in the genome | 1 | CCG010489. 1, CCG003390. 1, CCG025132. 1, CCG005898. 1, CCG004838. 1, CCG014461. 1                                                                                     |
| GO:0019319 | hexose biosynthetic process                                  | 6 of 4104 in the list  | 11 of 8404 in the genome | 1 | CCG012840. 1, CCG017278. 1, CCG007771. 1, CCG028524. 1, CCG00431. 1, CCG004388. 1                                                                                      |

|            |                                                                          |                       |                          |   |                                                                              |
|------------|--------------------------------------------------------------------------|-----------------------|--------------------------|---|------------------------------------------------------------------------------|
| GO:0046364 | monosaccharide biosynthetic process                                      | 6 of 4104 in the list | 11 of 8404 in the genome | 1 | CCG012840.1, CCG017278.1, CCG007771.1, CCG028524.1, CCG000431.1, CCG004388.1 |
| GO:0006012 | galactose metabolic process                                              | 5 of 4104 in the list | 9 of 8404 in the genome  | 1 | CCG010996.1, CCG007046.2, CCG007045.1, CCG018423.1, CCG001038.1              |
| GO:0006094 | gluconeogenesis                                                          | 5 of 4104 in the list | 9 of 8404 in the genome  | 1 | CCG012840.1, CCG017278.1, CCG028524.1, CCG000431.1, CCG004388.1              |
| GO:0006108 | malate metabolic process                                                 | 5 of 4104 in the list | 9 of 8404 in the genome  | 1 | CCG018290.1, CCG019111.1, CCG013063.1, CCG019112.1, CCG018289.1              |
| GO:0007169 | transmembrane receptor protein tyrosine kinase signaling pathway         | 5 of 4104 in the list | 9 of 8404 in the genome  | 1 | CCG018494.1, CCG022929.1, CCG010631.1, CCG020978.1, CCG021354.1              |
| GO:0045087 | innate immune response                                                   | 5 of 4104 in the list | 9 of 8404 in the genome  | 1 | CCG027669.1, CCG027668.1, CCG015967.1, CCG015966.1, CCG006124.1              |
| GO:0006013 | mannose metabolic process                                                | 4 of 4104 in the list | 7 of 8404 in the genome  | 1 | CCG012740.1, CCG016373.1, CCG017651.1, CCG007771.1                           |
| GO:0006541 | glutamine metabolic process                                              | 4 of 4104 in the list | 7 of 8404 in the genome  | 1 | CCG022773.2, CCG026030.1, CCG021923.1, CCG000472.1                           |
| GO:0006635 | fatty acid beta-oxidation                                                | 4 of 4104 in the list | 7 of 8404 in the genome  | 1 | CCG025521.1, CCG018851.1, CCG006391.1, CCG000591.1                           |
| GO:0006914 | autophagy                                                                | 4 of 4104 in the list | 7 of 8404 in the genome  | 1 | CCG017376.1, CCG002366.1, CCG002139.1, CCG000834.1                           |
| GO:0009062 | fatty acid catabolic process                                             | 4 of 4104 in the list | 7 of 8404 in the genome  | 1 | CCG025521.1, CCG018851.1, CCG006391.1, CCG000591.1                           |
| GO:0019395 | fatty acid oxidation                                                     | 4 of 4104 in the list | 7 of 8404 in the genome  | 1 | CCG025521.1, CCG018851.1, CCG006391.1, CCG000591.1                           |
| GO:0034440 | lipid oxidation                                                          | 4 of 4104 in the list | 7 of 8404 in the genome  | 1 | CCG025521.1, CCG018851.1, CCG006391.1, CCG000591.1                           |
| GO:0044242 | cellular lipid catabolic process                                         | 4 of 4104 in the list | 7 of 8404 in the genome  | 1 | CCG025521.1, CCG018851.1, CCG006391.1, CCG000591.1                           |
| GO:0072329 | monocarboxylic acid catabolic process                                    | 4 of 4104 in the list | 7 of 8404 in the genome  | 1 | CCG025521.1, CCG018851.1, CCG006391.1, CCG000591.1                           |
| GO:0006431 | methionyl-tRNA aminoacylation                                            | 3 of 4104 in the list | 5 of 8404 in the genome  | 1 | CCG022269.1, CCG001876.1, CCG000414.1                                        |
| GO:0006525 | arginine metabolic process                                               | 3 of 4104 in the list | 5 of 8404 in the genome  | 1 | CCG025731.1, CCG025897.1, CCG023501.1                                        |
| GO:0007178 | transmembrane receptor protein serine/threonine kinase signaling pathway | 3 of 4104 in the list | 5 of 8404 in the genome  | 1 | CCG018533.1, CCG022741.1, CCG016307.1                                        |
| GO:0009129 | pyrimidine nucleoside monophosphate metabolic process                    | 3 of 4104 in the list | 5 of 8404 in the genome  | 1 | CCG013610.1, CCG016614.1, CCG004180.1                                        |
| GO:0009130 | pyrimidine nucleoside monophosphate biosynthetic process                 | 3 of 4104 in the list | 5 of 8404 in the genome  | 1 | CCG013610.1, CCG016614.1, CCG004180.1                                        |
| GO:0009636 | response to toxic substance                                              | 3 of 4104 in the list | 5 of 8404 in the genome  | 1 | CCG013113.1, CCG013809.1, CCG014378.1                                        |

|            |                                                                   |                       |                         |   |                                       |
|------------|-------------------------------------------------------------------|-----------------------|-------------------------|---|---------------------------------------|
| GO:0015937 | coenzyme A biosynthetic process                                   | 3 of 4104 in the list | 5 of 8404 in the genome | 1 | CCG021336.1, CCG013999.1, CCG026812.1 |
| GO:0033866 | nucleoside bisphosphate biosynthetic process                      | 3 of 4104 in the list | 5 of 8404 in the genome | 1 | CCG021336.1, CCG013999.1, CCG026812.1 |
| GO:0034030 | ribonucleoside bisphosphate biosynthetic process                  | 3 of 4104 in the list | 5 of 8404 in the genome | 1 | CCG021336.1, CCG013999.1, CCG026812.1 |
| GO:0034033 | purine nucleoside bisphosphate biosynthetic process               | 3 of 4104 in the list | 5 of 8404 in the genome | 1 | CCG021336.1, CCG013999.1, CCG026812.1 |
| GO:0043269 | regulation of ion transport                                       | 3 of 4104 in the list | 5 of 8404 in the genome | 1 | CCG026240.1, CCG001279.1, CCG013013.1 |
| GO:0044070 | regulation of anion transport                                     | 3 of 4104 in the list | 5 of 8404 in the genome | 1 | CCG026240.1, CCG001279.1, CCG013013.1 |
| GO:0051049 | regulation of transport                                           | 3 of 4104 in the list | 5 of 8404 in the genome | 1 | CCG026240.1, CCG001279.1, CCG013013.1 |
| GO:0006177 | GMP biosynthetic process                                          | 2 of 4104 in the list | 3 of 8404 in the genome | 1 | CCG006791.1, CCG018659.2              |
| GO:0006188 | IMP biosynthetic process                                          | 2 of 4104 in the list | 3 of 8404 in the genome | 1 | CCG028305.1, CCG017330.1              |
| GO:0006222 | UMP biosynthetic process                                          | 2 of 4104 in the list | 3 of 8404 in the genome | 1 | CCG013610.1, CCG016614.1              |
| GO:0006471 | protein ADP-ribosylation                                          | 2 of 4104 in the list | 3 of 8404 in the genome | 1 | CCG001602.1, CCG018432.1              |
| GO:0006526 | arginine biosynthetic process                                     | 2 of 4104 in the list | 3 of 8404 in the genome | 1 | CCG025731.1, CCG025897.1              |
| GO:0006573 | valine metabolic process                                          | 2 of 4104 in the list | 3 of 8404 in the genome | 1 | CCG025307.1, CCG009084.2              |
| GO:0006857 | oligopeptide transport                                            | 2 of 4104 in the list | 3 of 8404 in the genome | 1 | CCG010135.1, CCG005539.1              |
| GO:0007591 | molting cycle, chitin-based cuticle                               | 2 of 4104 in the list | 3 of 8404 in the genome | 1 | CCG022367.1, CCG017791.1              |
| GO:0009173 | pyrimidine ribonucleoside monophosphate metabolic process         | 2 of 4104 in the list | 3 of 8404 in the genome | 1 | CCG013610.1, CCG016614.1              |
| GO:0009174 | pyrimidine ribonucleoside monophosphate biosynthetic process      | 2 of 4104 in the list | 3 of 8404 in the genome | 1 | CCG013610.1, CCG016614.1              |
| GO:0015833 | peptide transport                                                 | 2 of 4104 in the list | 3 of 8404 in the genome | 1 | CCG010135.1, CCG005539.1              |
| GO:0016075 | rRNA catabolic process                                            | 2 of 4104 in the list | 3 of 8404 in the genome | 1 | CCG020685.1, CCG019674.1              |
| GO:0017182 | peptidyl-diphthamide metabolic process                            | 2 of 4104 in the list | 3 of 8404 in the genome | 1 | CCG022589.1, CCG013914.1              |
| GO:0017183 | peptidyl-diphthamide biosynthetic process from peptidyl-histidine | 2 of 4104 in the list | 3 of 8404 in the genome | 1 | CCG022589.1, CCG013914.1              |
| GO:0018990 | ecdysis, chitin-based cuticle                                     | 2 of 4104 in the list | 3 of 8404 in the genome | 1 | CCG022367.1, CCG017791.1              |
| GO:0022404 | molting cycle process                                             | 2 of 4104 in the list | 3 of 8404 in the genome | 1 | CCG022367.1, CCG017791.1              |
| GO:0034661 | ncRNA catabolic process                                           | 2 of 4104 in the list | 3 of 8404 in the genome | 1 | CCG020685.1, CCG019674.1              |
| GO:0042026 | protein refolding                                                 | 2 of 4104 in the list | 3 of 8404 in the genome | 1 | CCG022020.1, CCG027565.1              |

|            |                                                   |                        |                          |   |                                                                                                                                                                                                                                                                                                                                                                                                                   |
|------------|---------------------------------------------------|------------------------|--------------------------|---|-------------------------------------------------------------------------------------------------------------------------------------------------------------------------------------------------------------------------------------------------------------------------------------------------------------------------------------------------------------------------------------------------------------------|
| GO:0042303 | molting cycle                                     | 2 of 4104 in the list  | 3 of 8404 in the genome  | 1 | CCG022367.1, CCG017791.1                                                                                                                                                                                                                                                                                                                                                                                          |
| GO:0042886 | amide transport                                   | 2 of 4104 in the list  | 3 of 8404 in the genome  | 1 | CCG010135.1, CCG005539.1                                                                                                                                                                                                                                                                                                                                                                                          |
| GO:0046037 | GMP metabolic process                             | 2 of 4104 in the list  | 3 of 8404 in the genome  | 1 | CCG006791.1, CCG018659.2                                                                                                                                                                                                                                                                                                                                                                                          |
| GO:0046040 | IMP metabolic process                             | 2 of 4104 in the list  | 3 of 8404 in the genome  | 1 | CCG028305.1, CCG017330.1                                                                                                                                                                                                                                                                                                                                                                                          |
| GO:0046049 | UMP metabolic process                             | 2 of 4104 in the list  | 3 of 8404 in the genome  | 1 | CCG013610.1, CCG016614.1                                                                                                                                                                                                                                                                                                                                                                                          |
| GO:0051704 | multi-organism process                            | 2 of 4104 in the list  | 3 of 8404 in the genome  | 1 | CCG012551.1, CCG019159.1                                                                                                                                                                                                                                                                                                                                                                                          |
| GO:0016051 | carbohydrate biosynthetic process                 | 18 of 4104 in the list | 36 of 8404 in the genome | 1 | CCG000331.1, CCG028524.1, CCG015986.1, CCG019693.1, CCG012840.1, CCG016653.1, CCG009803.1, CCG017278.1, CCG007771.1, CCG008130.1, CCG000431.1, CCG004388.1, CCG022430.1, CCG014260.1, CCG023757.1, CCG014174.1, CCG024762.1, CCG013129.1                                                                                                                                                                          |
| GO:0072522 | purine-containing compound biosynthetic process   | 31 of 4104 in the list | 63 of 8404 in the genome | 1 | CCG015410.1, CCG002038.1, CCG025107.1, CCG009142.1, CCG017995.1, CCG023640.1, CCG026898.1, CCG026812.1, CCG017331.1, CCG000148.1, CCG006529.1, CCG025348.1, CCG013365.1, CCG025989.2, CCG019619.1, CCG018659.2, CCG005924.2, CCG008422.1, CCG021336.1, CCG013999.1, CCG028305.1, CCG010112.1, CCG004257.1, CCG007417.1, CCG017330.1, CCG006791.1, CCG021110.1, CCG016955.1, CCG007724.1, CCG021934.1, CCG013643.1 |
| GO:0045454 | cell redox homeostasis                            | 29 of 4104 in the list | 59 of 8404 in the genome | 1 | CCG009285.1, CCG009063.1, CCG005375.1, CCG002466.1, CCG006787.1, CCG012993.1, CCG004548.1, CCG028500.2, CCG006600.1, CCG005587.1, CCG012992.1, CCG027430.1, CCG014566.1, CCG020637.1, CCG022471.1, CCG021250.1, CCG001847.1, CCG012678.1, CCG004595.1, CCG005714.1, CCG026500.1, CCG004446.1, CCG013244.3, CCG004445.1, CCG013245.1, CCG008924.1, CCG020472.1, CCG009674.1, CCG027531.2                           |
| GO:0042398 | cellular modified amino acid biosynthetic process | 12 of 4104 in the list | 24 of 8404 in the genome | 1 | CCG000682.1, CCG008932.1, CCG002897.1, CCG026099.1, CCG010561.1, CCG013043.1, CCG015943.1, CCG016955.1, CCG011491.1, CCG026155.1, CCG020441.1, CCG021610.1                                                                                                                                                                                                                                                        |
| GO:0032940 | secretion by cell                                 | 10 of 4104 in the list | 20 of 8404 in the genome | 1 | CCG016860.1, CCG002374.1, CCG000631.1, CCG008323.1, CCG016493.2, CCG002121.1, CCG002937.1, CCG016836.2, CCG005810.1, CCG023051.1                                                                                                                                                                                                                                                                                  |
| GO:0046903 | secretion                                         | 10 of 4104 in the list | 20 of 8404 in the genome | 1 | CCG016860.1, CCG002374.1, CCG000631.1, CCG008323.1, CCG016493.2, CCG002121.1, CCG002937.1, CCG016836.2, CCG005810.1, CCG023051.1                                                                                                                                                                                                                                                                                  |
| GO:0016042 | lipid catabolic process                           | 9 of 4104 in the list  | 18 of 8404 in the genome | 1 | CCG025521.1, CCG025387.1, CCG018851.1, CCG019697.2, CCG015351.1, CCG015949.1, CCG006391.1, CCG000591.1, CCG024092.1                                                                                                                                                                                                                                                                                               |
| GO:0006887 | exocytosis                                        | 8 of 4104 in the list  | 16 of 8404 in the genome | 1 | CCG002121.1, CCG016860.1, CCG016836.2, CCG002937.1, CCG000631.1, CCG005810.1, CCG016493.2, CCG023051.1                                                                                                                                                                                                                                                                                                            |

|            |                                                                          |                        |                          |   |                                                                                                                                                                                                                                                       |
|------------|--------------------------------------------------------------------------|------------------------|--------------------------|---|-------------------------------------------------------------------------------------------------------------------------------------------------------------------------------------------------------------------------------------------------------|
| GO:0006026 | aminoglycan catabolic process                                            | 19 of 4104 in the list | 39 of 8404 in the genome | 1 | CCG015610.1, CCG020799.1, CCG019470.1, CCG015907.1, CCG002418.1, CCG020793.1, CCG024829.1, CCG028235.1, CCG023890.1, CCG021117.1, CCG002417.1, CCG023420.1, CCG004020.1, CCG016477.1, CCG025962.1, CCG010019.1, CCG012048.1, CCG011996.1, CCG005029.1 |
| GO:0006816 | calcium ion transport                                                    | 6 of 4104 in the list  | 12 of 8404 in the genome | 1 | CCG025568.1, CCG014448.1, CCG027585.1, CCG009808.1, CCG005277.1, CCG011706.1                                                                                                                                                                          |
| GO:0007205 | protein kinase C-activating G-protein coupled receptor signaling pathway | 6 of 4104 in the list  | 12 of 8404 in the genome | 1 | CCG008185.1, CCG014837.1, CCG019493.1, CCG017701.1, CCG015807.1, CCG016608.2                                                                                                                                                                          |
| GO:0070838 | divalent metal ion transport                                             | 6 of 4104 in the list  | 12 of 8404 in the genome | 1 | CCG025568.1, CCG014448.1, CCG027585.1, CCG009808.1, CCG005277.1, CCG011706.1                                                                                                                                                                          |
| GO:0072511 | divalent inorganic cation transport                                      | 6 of 4104 in the list  | 12 of 8404 in the genome | 1 | CCG025568.1, CCG014448.1, CCG027585.1, CCG009808.1, CCG005277.1, CCG011706.1                                                                                                                                                                          |
| GO:0072524 | pyridine-containing compound metabolic process                           | 6 of 4104 in the list  | 12 of 8404 in the genome | 1 | CCG026536.1, CCG003748.1, CCG009518.1, CCG004188.3, CCG025307.1, CCG009084.2                                                                                                                                                                          |



|            |                                                 |                         |                           |   |                                                                                                                                                                                                                                                                                                                                                                                                                                                                                                                                                                                                                                                                                                                                                                                                                                                                                                                                                                                                                                                                                                                                                                                                                                                                                                                                                                                                                                                                                                                                                                                                                                                                                                                                                                                                                                                                                                                                                                   |
|------------|-------------------------------------------------|-------------------------|---------------------------|---|-------------------------------------------------------------------------------------------------------------------------------------------------------------------------------------------------------------------------------------------------------------------------------------------------------------------------------------------------------------------------------------------------------------------------------------------------------------------------------------------------------------------------------------------------------------------------------------------------------------------------------------------------------------------------------------------------------------------------------------------------------------------------------------------------------------------------------------------------------------------------------------------------------------------------------------------------------------------------------------------------------------------------------------------------------------------------------------------------------------------------------------------------------------------------------------------------------------------------------------------------------------------------------------------------------------------------------------------------------------------------------------------------------------------------------------------------------------------------------------------------------------------------------------------------------------------------------------------------------------------------------------------------------------------------------------------------------------------------------------------------------------------------------------------------------------------------------------------------------------------------------------------------------------------------------------------------------------------|
| GO:0044765 | single-organism transport                       | 437 of 4104 in the list | 900 of 8404 in the genome | 1 | CCG005307. 1, CCG020245. 1, CCG001809. 1, CCG010623. 2, CCG003545. 1, CCG017209. 1, CCG021740. 1, CCG004086. 1, CCG021738. 1, CCG000585. 1, CCG000205. 1, CCG004026. 1, CCG001468. 1, CCG019285. 1, CCG000300. 1, CCG003878. 1, CCG027758. 1, CCG022794. 1, CCG002389. 1, CCG017210. 1, CCG014382. 1, CCG016326. 1, CCG013708. 1, CCG002766. 1, CCG023583. 1, CCG003712. 1, CCG027184. 1, CCG001379. 1, CCG005140. 1, CCG016860. 1, CCG009367. 1, CCG017078. 1, CCG012061. 1, CCG026799. 1, CCG011696. 1, CCG025274. 1, CCG027185. 1, CCG009530. 1, CCG003934. 1, CCG017240. 1, CCG005539. 1, CCG018883. 1, CCG016959. 1, CCG012307. 1, CCG027368. 1, CCG001220. 1, CCG019190. 1, CCG025450. 1, CCG024032. 1, CCG018661. 1, CCG016654. 1, CCG018133. 1, CCG008323. 1, CCG018416. 1, CCG014240. 1, CCG006714. 1, CCG011862. 1, CCG006525. 1, CCG016754. 1, CCG026050. 1, CCG001964. 1, CCG009208. 1, CCG019655. 1, CCG009668. 1, CCG010710. 1, CCG005330. 1, CCG016493. 2, CCG007743. 1, CCG016269. 1, CCG009207. 1, CCG019191. 1, CCG004573. 1, CCG011830. 1, CCG012534. 1, CCG006588. 2, CCG000524. 1, CCG014793. 1, CCG016267. 1, CCG024222. 1, CCG006489. 1, CCG026293. 1, CCG021686. 1, CCG019678. 1, CCG014000. 1, CCG018264. 1, CCG024590. 1, CCG017477. 1, CCG006004. 1, CCG005391. 2, CCG022168. 1, CCG018263. 1, CCG007597. 1, CCG016756. 1, CCG019647. 1, CCG015530. 1, CCG026151. 1, CCG022587. 1, CCG009959. 1, CCG027182. 1, CCG016719. 1, CCG013635. 1, CCG000983. 1, CCG010416. 1, CCG002937. 1, CCG022488. 2, CCG001285. 1, CCG011766. 1, CCG016753. 1, CCG011829. 1, CCG005786. 1, CCG023060. 1, CCG008709. 1, CCG011252. 1, CCG007954. 1, CCG000210. 1, CCG008403. 1, CCG008422. 1, CCG016347. 1, CCG022802. 1, CCG010112. 1, CCG020491. 1, CCG014448. 1, CCG027154. 1, CCG017077. 1, CCG001652. 1, CCG016266. 1, CCG000080. 1, CCG001267. 1, CCG022137. 1, CCG026819. 1, CCG012195. 1, CCG025467. 2, CCG011827. 1, CCG009811. 1, CCG018271. 1, |
| GO:0006778 | porphyrin-containing compound metabolic process | 5 of 4104 in the list   | 10 of 8404 in the genome  | 1 | CCG027212. 1, CCG026752. 1, CCG021335. 1, CCG009424. 1, CCG005053. 1                                                                                                                                                                                                                                                                                                                                                                                                                                                                                                                                                                                                                                                                                                                                                                                                                                                                                                                                                                                                                                                                                                                                                                                                                                                                                                                                                                                                                                                                                                                                                                                                                                                                                                                                                                                                                                                                                              |
| GO:0007267 | cell-cell signaling                             | 5 of 4104 in the list   | 10 of 8404 in the genome  | 1 | CCG010339. 1, CCG011356. 1, CCG026604. 1, CCG008323. 1, CCG005596. 1                                                                                                                                                                                                                                                                                                                                                                                                                                                                                                                                                                                                                                                                                                                                                                                                                                                                                                                                                                                                                                                                                                                                                                                                                                                                                                                                                                                                                                                                                                                                                                                                                                                                                                                                                                                                                                                                                              |
| GO:0019362 | pyridine nucleotide metabolic process           | 5 of 4104 in the list   | 10 of 8404 in the genome  | 1 | CCG003748. 1, CCG009518. 1, CCG004188. 3, CCG025307. 1, CCG009084. 2                                                                                                                                                                                                                                                                                                                                                                                                                                                                                                                                                                                                                                                                                                                                                                                                                                                                                                                                                                                                                                                                                                                                                                                                                                                                                                                                                                                                                                                                                                                                                                                                                                                                                                                                                                                                                                                                                              |

|            |                                                    |                        |                          |   |                                                                                                                                                                                                                                                                                                                                                                                                      |
|------------|----------------------------------------------------|------------------------|--------------------------|---|------------------------------------------------------------------------------------------------------------------------------------------------------------------------------------------------------------------------------------------------------------------------------------------------------------------------------------------------------------------------------------------------------|
| GO:0046496 | nicotinamide nucleotide metabolic process          | 5 of 4104 in the list  | 10 of 8404 in the genome | 1 | CCG003748.1, CCG009518.1, CCG004188.3, CCG025307.1, CCG009084.2                                                                                                                                                                                                                                                                                                                                      |
| GO:0048015 | phosphatidylinositol-mediated signaling            | 5 of 4104 in the list  | 10 of 8404 in the genome | 1 | CCG000789.1, CCG019820.1, CCG011658.1, CCG023393.1, CCG012959.1                                                                                                                                                                                                                                                                                                                                      |
| GO:0048017 | inositol lipid-mediated signaling                  | 5 of 4104 in the list  | 10 of 8404 in the genome | 1 | CCG000789.1, CCG019820.1, CCG011658.1, CCG023393.1, CCG012959.1                                                                                                                                                                                                                                                                                                                                      |
| GO:0006575 | cellular modified amino acid metabolic process     | 13 of 4104 in the list | 27 of 8404 in the genome | 1 | CCG000682.1, CCG008932.1, CCG002897.1, CCG026099.1, CCG010561.1, CCG013043.1, CCG015943.1, CCG016955.1, CCG011491.1, CCG026155.1, CCG020441.1, CCG021610.1, CCG006059.1                                                                                                                                                                                                                              |
| GO:0017038 | protein import                                     | 13 of 4104 in the list | 27 of 8404 in the genome | 1 | CCG016347.1, CCG022771.1, CCG011766.1, CCG027762.1, CCG017078.1, CCG001809.1, CCG011696.1, CCG027564.1, CCG019797.1, CCG002766.1, CCG017077.1, CCG020949.1, CCG004026.1                                                                                                                                                                                                                              |
| GO:0005977 | glycogen metabolic process                         | 4 of 4104 in the list  | 8 of 8404 in the genome  | 1 | CCG022430.1, CCG004760.1, CCG025015.2, CCG008130.1                                                                                                                                                                                                                                                                                                                                                   |
| GO:0006073 | cellular glucan metabolic process                  | 4 of 4104 in the list  | 8 of 8404 in the genome  | 1 | CCG022430.1, CCG004760.1, CCG025015.2, CCG008130.1                                                                                                                                                                                                                                                                                                                                                   |
| GO:0006112 | energy reserve metabolic process                   | 4 of 4104 in the list  | 8 of 8404 in the genome  | 1 | CCG022430.1, CCG004760.1, CCG025015.2, CCG008130.1                                                                                                                                                                                                                                                                                                                                                   |
| GO:0006487 | protein N-linked glycosylation                     | 4 of 4104 in the list  | 8 of 8404 in the genome  | 1 | CCG018536.1, CCG016003.1, CCG004091.1, CCG017197.1                                                                                                                                                                                                                                                                                                                                                   |
| GO:0006779 | porphyrin-containing compound biosynthetic process | 4 of 4104 in the list  | 8 of 8404 in the genome  | 1 | CCG027212.1, CCG026752.1, CCG021335.1, CCG005053.1                                                                                                                                                                                                                                                                                                                                                   |
| GO:0044042 | glucan metabolic process                           | 4 of 4104 in the list  | 8 of 8404 in the genome  | 1 | CCG022430.1, CCG004760.1, CCG025015.2, CCG008130.1                                                                                                                                                                                                                                                                                                                                                   |
| GO:0051186 | cofactor metabolic process                         | 30 of 4104 in the list | 63 of 8404 in the genome | 1 | CCG000682.1, CCG027212.1, CCG010561.1, CCG026752.1, CCG009424.1, CCG025307.1, CCG003683.2, CCG026812.1, CCG021086.2, CCG011491.1, CCG023780.2, CCG021335.1, CCG005053.1, CCG009084.2, CCG018113.1, CCG003173.1, CCG013999.1, CCG013216.1, CCG021336.1, CCG009518.1, CCG004188.3, CCG015943.1, CCG016955.1, CCG024432.2, CCG003748.1, CCG003751.1, CCG016148.1, CCG006009.1, CCG020441.1, CCG010319.1 |
| GO:0016567 | protein ubiquitination                             | 10 of 4104 in the list | 21 of 8404 in the genome | 1 | CCG016189.1, CCG019139.1, CCG003060.1, CCG010433.1, CCG020757.1, CCG008557.1, CCG006505.1, CCG020230.3, CCG016294.1, CCG022370.1                                                                                                                                                                                                                                                                     |

|            |                                                   |                        |                          |   |                                                                                                                                                                                                                                                                                                                                                                                                                                                                                                                                                                  |
|------------|---------------------------------------------------|------------------------|--------------------------|---|------------------------------------------------------------------------------------------------------------------------------------------------------------------------------------------------------------------------------------------------------------------------------------------------------------------------------------------------------------------------------------------------------------------------------------------------------------------------------------------------------------------------------------------------------------------|
| GO:0019725 | cellular homeostasis                              | 39 of 4104 in the list | 82 of 8404 in the genome | 1 | CCG009285. 1, CCG005375. 1, CCG002466. 1, CCG012993. 1, CCG004548. 1, CCG006600. 1, CCG026796. 1, CCG012992. 1, CCG014566. 1, CCG008826. 1, CCG020637. 1, CCG022471. 1, CCG012678. 1, CCG004595. 1, CCG005714. 1, CCG004446. 1, CCG020472. 1, CCG028221. 1, CCG012569. 1, CCG024590. 1, CCG020377. 1, CCG009063. 1, CCG006787. 1, CCG009992. 1, CCG028500. 2, CCG003104. 1, CCG005587. 1, CCG027430. 1, CCG021250. 1, CCG001847. 1, CCG026500. 1, CCG000302. 1, CCG004445. 1, CCG013244. 3, CCG008924. 1, CCG013245. 1, CCG020400. 2, CCG009674. 1, CCG027531. 2 |
| GO:0000154 | rRNA modification                                 | 3 of 4104 in the list  | 6 of 8404 in the genome  | 1 | CCG019953. 1, CCG016274. 1, CCG005097. 1                                                                                                                                                                                                                                                                                                                                                                                                                                                                                                                         |
| GO:0006098 | pentose-phosphate shunt                           | 3 of 4104 in the list  | 6 of 8404 in the genome  | 1 | CCG003748. 1, CCG025307. 1, CCG009084. 2                                                                                                                                                                                                                                                                                                                                                                                                                                                                                                                         |
| GO:0006739 | NADP metabolic process                            | 3 of 4104 in the list  | 6 of 8404 in the genome  | 1 | CCG003748. 1, CCG025307. 1, CCG009084. 2                                                                                                                                                                                                                                                                                                                                                                                                                                                                                                                         |
| GO:0006740 | NADPH regeneration                                | 3 of 4104 in the list  | 6 of 8404 in the genome  | 1 | CCG003748. 1, CCG025307. 1, CCG009084. 2                                                                                                                                                                                                                                                                                                                                                                                                                                                                                                                         |
| GO:0008202 | steroid metabolic process                         | 3 of 4104 in the list  | 6 of 8404 in the genome  | 1 | CCG024095. 1, CCG015949. 1, CCG011183. 1                                                                                                                                                                                                                                                                                                                                                                                                                                                                                                                         |
| GO:0022618 | ribonucleoprotein complex assembly                | 3 of 4104 in the list  | 6 of 8404 in the genome  | 1 | CCG023663. 1, CCG010792. 1, CCG007518. 1                                                                                                                                                                                                                                                                                                                                                                                                                                                                                                                         |
| GO:0030030 | cell projection organization                      | 3 of 4104 in the list  | 6 of 8404 in the genome  | 1 | CCG018859. 3, CCG017033. 1, CCG015583. 1                                                                                                                                                                                                                                                                                                                                                                                                                                                                                                                         |
| GO:0042168 | heme metabolic process                            | 3 of 4104 in the list  | 6 of 8404 in the genome  | 1 | CCG027212. 1, CCG009424. 1, CCG005053. 1                                                                                                                                                                                                                                                                                                                                                                                                                                                                                                                         |
| GO:0071826 | ribonucleoprotein complex subunit organization    | 3 of 4104 in the list  | 6 of 8404 in the genome  | 1 | CCG023663. 1, CCG010792. 1, CCG007518. 1                                                                                                                                                                                                                                                                                                                                                                                                                                                                                                                         |
| GO:0072525 | pyridine-containing compound biosynthetic process | 3 of 4104 in the list  | 6 of 8404 in the genome  | 1 | CCG026536. 1, CCG009518. 1, CCG004188. 3                                                                                                                                                                                                                                                                                                                                                                                                                                                                                                                         |
| GO:0030203 | glycosaminoglycan metabolic process               | 9 of 4104 in the list  | 19 of 8404 in the genome | 1 | CCG017559. 1, CCG024517. 1, CCG020799. 1, CCG019470. 1, CCG015907. 1, CCG022072. 1, CCG025840. 1, CCG028235. 1, CCG005029. 1                                                                                                                                                                                                                                                                                                                                                                                                                                     |
| GO:0006732 | coenzyme metabolic process                        | 25 of 4104 in the list | 53 of 8404 in the genome | 1 | CCG000682. 1, CCG010561. 1, CCG025307. 1, CCG003683. 2, CCG026812. 1, CCG021086. 2, CCG011491. 1, CCG023780. 2, CCG009084. 2, CCG018113. 1, CCG003173. 1, CCG013999. 1, CCG013216. 1, CCG021336. 1, CCG009518. 1, CCG004188. 3, CCG015943. 1, CCG016955. 1, CCG024432. 2, CCG003748. 1, CCG003751. 1, CCG016148. 1, CCG006009. 1, CCG020441. 1, CCG010319. 1                                                                                                                                                                                                     |
| GO:0051188 | cofactor biosynthetic process                     | 24 of 4104 in the list | 51 of 8404 in the genome | 1 | CCG000682. 1, CCG027212. 1, CCG010561. 1, CCG026752. 1, CCG003683. 2, CCG026812. 1, CCG021086. 2, CCG011491. 1, CCG023780. 2, CCG021335. 1, CCG005053. 1, CCG003173. 1, CCG013999. 1, CCG021336. 1, CCG009518. 1, CCG004188. 3, CCG015943. 1, CCG016955. 1, CCG024432. 2, CCG003751. 1, CCG016148. 1, CCG006009. 1, CCG020441. 1, CCG010319. 1                                                                                                                                                                                                                   |

|            |                                                     |                        |                          |   |                                                                                                                                                                                                                                                                                                                                                                                                                                                                                                                                                                                                            |
|------------|-----------------------------------------------------|------------------------|--------------------------|---|------------------------------------------------------------------------------------------------------------------------------------------------------------------------------------------------------------------------------------------------------------------------------------------------------------------------------------------------------------------------------------------------------------------------------------------------------------------------------------------------------------------------------------------------------------------------------------------------------------|
| GO:0042592 | homeostatic process                                 | 42 of 4104 in the list | 89 of 8404 in the genome | 1 | CCG009285. 1, CCG005375. 1, CCG002466. 1, CCG012993. 1, CCG004548. 1, CCG006600. 1, CCG026796. 1, CCG012992. 1, CCG014566. 1, CCG008826. 1, CCG020637. 1, CCG022471. 1, CCG012678. 1, CCG004595. 1, CCG005714. 1, CCG016162. 1, CCG004446. 1, CCG016956. 1, CCG020472. 1, CCG028221. 1, CCG012569. 1, CCG024590. 1, CCG020377. 1, CCG009063. 1, CCG006787. 1, CCG009992. 1, CCG028500. 2, CCG003104. 1, CCG005587. 1, CCG027430. 1, CCG021250. 1, CCG001847. 1, CCG026500. 1, CCG000302. 1, CCG004445. 1, CCG013244. 3, CCG008924. 1, CCG013245. 1, CCG020400. 2, CCG009674. 1, CCG027531. 2, CCG023671. 2 |
| GO:0005978 | glycogen biosynthetic process                       | 2 of 4104 in the list  | 4 of 8404 in the genome  | 1 | CCG022430. 1, CCG008130. 1                                                                                                                                                                                                                                                                                                                                                                                                                                                                                                                                                                                 |
| GO:0006435 | threonyl-tRNA aminoacylation                        | 2 of 4104 in the list  | 4 of 8404 in the genome  | 1 | CCG002662. 1, CCG027607. 1                                                                                                                                                                                                                                                                                                                                                                                                                                                                                                                                                                                 |
| GO:0006536 | glutamate metabolic process                         | 2 of 4104 in the list  | 4 of 8404 in the genome  | 1 | CCG007203. 1, CCG002231. 1                                                                                                                                                                                                                                                                                                                                                                                                                                                                                                                                                                                 |
| GO:0006537 | glutamate biosynthetic process                      | 2 of 4104 in the list  | 4 of 8404 in the genome  | 1 | CCG007203. 1, CCG002231. 1                                                                                                                                                                                                                                                                                                                                                                                                                                                                                                                                                                                 |
| GO:0006749 | glutathione metabolic process                       | 2 of 4104 in the list  | 4 of 8404 in the genome  | 1 | CCG002897. 1, CCG026099. 1                                                                                                                                                                                                                                                                                                                                                                                                                                                                                                                                                                                 |
| GO:0006750 | glutathione biosynthetic process                    | 2 of 4104 in the list  | 4 of 8404 in the genome  | 1 | CCG002897. 1, CCG026099. 1                                                                                                                                                                                                                                                                                                                                                                                                                                                                                                                                                                                 |
| GO:0006783 | heme biosynthetic process                           | 2 of 4104 in the list  | 4 of 8404 in the genome  | 1 | CCG027212. 1, CCG005053. 1                                                                                                                                                                                                                                                                                                                                                                                                                                                                                                                                                                                 |
| GO:0007229 | integrin-mediated signaling pathway                 | 2 of 4104 in the list  | 4 of 8404 in the genome  | 1 | CCG004279. 1, CCG000526. 1                                                                                                                                                                                                                                                                                                                                                                                                                                                                                                                                                                                 |
| GO:0009221 | pyrimidine deoxyribonucleotide biosynthetic process | 2 of 4104 in the list  | 4 of 8404 in the genome  | 1 | CCG004180. 1, CCG014116. 1                                                                                                                                                                                                                                                                                                                                                                                                                                                                                                                                                                                 |
| GO:0009250 | glucan biosynthetic process                         | 2 of 4104 in the list  | 4 of 8404 in the genome  | 1 | CCG022430. 1, CCG008130. 1                                                                                                                                                                                                                                                                                                                                                                                                                                                                                                                                                                                 |
| GO:0009263 | deoxyribonucleotide biosynthetic process            | 2 of 4104 in the list  | 4 of 8404 in the genome  | 1 | CCG004180. 1, CCG014116. 1                                                                                                                                                                                                                                                                                                                                                                                                                                                                                                                                                                                 |
| GO:0009265 | 2'-deoxyribonucleotide biosynthetic process         | 2 of 4104 in the list  | 4 of 8404 in the genome  | 1 | CCG004180. 1, CCG014116. 1                                                                                                                                                                                                                                                                                                                                                                                                                                                                                                                                                                                 |
| GO:0009435 | NAD biosynthetic process                            | 2 of 4104 in the list  | 4 of 8404 in the genome  | 1 | CCG009518. 1, CCG004188. 3                                                                                                                                                                                                                                                                                                                                                                                                                                                                                                                                                                                 |
| GO:0016050 | vesicle organization                                | 2 of 4104 in the list  | 4 of 8404 in the genome  | 1 | CCG020315. 1, CCG026620. 1                                                                                                                                                                                                                                                                                                                                                                                                                                                                                                                                                                                 |
| GO:0016226 | iron-sulfur cluster assembly                        | 2 of 4104 in the list  | 4 of 8404 in the genome  | 1 | CCG003485. 1, CCG007395. 1                                                                                                                                                                                                                                                                                                                                                                                                                                                                                                                                                                                 |
| GO:0016575 | histone deacetylation                               | 2 of 4104 in the list  | 4 of 8404 in the genome  | 1 | CCG013028. 1, CCG020863. 1                                                                                                                                                                                                                                                                                                                                                                                                                                                                                                                                                                                 |
| GO:0018196 | peptidyl-asparagine modification                    | 2 of 4104 in the list  | 4 of 8404 in the genome  | 1 | CCG018536. 1, CCG004091. 1                                                                                                                                                                                                                                                                                                                                                                                                                                                                                                                                                                                 |
| GO:0018279 | protein N-linked glycosylation via asparagine       | 2 of 4104 in the list  | 4 of 8404 in the genome  | 1 | CCG018536. 1, CCG004091. 1                                                                                                                                                                                                                                                                                                                                                                                                                                                                                                                                                                                 |
| GO:0019184 | nonribosomal peptide biosynthetic process           | 2 of 4104 in the list  | 4 of 8404 in the genome  | 1 | CCG002897. 1, CCG026099. 1                                                                                                                                                                                                                                                                                                                                                                                                                                                                                                                                                                                 |

|            |                                                       |                        |                          |   |                                                                                                                                                                                                                                                                    |
|------------|-------------------------------------------------------|------------------------|--------------------------|---|--------------------------------------------------------------------------------------------------------------------------------------------------------------------------------------------------------------------------------------------------------------------|
| GO:0019359 | nicotinamide nucleotide biosynthetic process          | 2 of 4104 in the list  | 4 of 8404 in the genome  | 1 | CCG009518.1, CCG004188.3                                                                                                                                                                                                                                           |
| GO:0019363 | pyridine nucleotide biosynthetic process              | 2 of 4104 in the list  | 4 of 8404 in the genome  | 1 | CCG009518.1, CCG004188.3                                                                                                                                                                                                                                           |
| GO:0019674 | NAD metabolic process                                 | 2 of 4104 in the list  | 4 of 8404 in the genome  | 1 | CCG009518.1, CCG004188.3                                                                                                                                                                                                                                           |
| GO:0031163 | metallo-sulfur cluster assembly                       | 2 of 4104 in the list  | 4 of 8404 in the genome  | 1 | CCG003485.1, CCG007395.1                                                                                                                                                                                                                                           |
| GO:0032784 | regulation of DNA-templated transcription, elongation | 2 of 4104 in the list  | 4 of 8404 in the genome  | 1 | CCG014982.1, CCG014983.1                                                                                                                                                                                                                                           |
| GO:0042255 | ribosome assembly                                     | 2 of 4104 in the list  | 4 of 8404 in the genome  | 1 | CCG023663.1, CCG007518.1                                                                                                                                                                                                                                           |
| GO:0043043 | peptide biosynthetic process                          | 2 of 4104 in the list  | 4 of 8404 in the genome  | 1 | CCG002897.1, CCG026099.1                                                                                                                                                                                                                                           |
| GO:0043650 | dicarboxylic acid biosynthetic process                | 2 of 4104 in the list  | 4 of 8404 in the genome  | 1 | CCG007203.1, CCG002231.1                                                                                                                                                                                                                                           |
| GO:0044801 | single-organism membrane fusion                       | 2 of 4104 in the list  | 4 of 8404 in the genome  | 1 | CCG020315.1, CCG026620.1                                                                                                                                                                                                                                           |
| GO:0046385 | deoxyribose phosphate biosynthetic process            | 2 of 4104 in the list  | 4 of 8404 in the genome  | 1 | CCG004180.1, CCG014116.1                                                                                                                                                                                                                                           |
| GO:0048284 | organelle fusion                                      | 2 of 4104 in the list  | 4 of 8404 in the genome  | 1 | CCG020315.1, CCG026620.1                                                                                                                                                                                                                                           |
| GO:0051205 | protein insertion into membrane                       | 2 of 4104 in the list  | 4 of 8404 in the genome  | 1 | CCG027323.1, CCG007941.1                                                                                                                                                                                                                                           |
| GO:0051668 | localization within membrane                          | 2 of 4104 in the list  | 4 of 8404 in the genome  | 1 | CCG027323.1, CCG007941.1                                                                                                                                                                                                                                           |
| GO:0061025 | membrane fusion                                       | 2 of 4104 in the list  | 4 of 8404 in the genome  | 1 | CCG020315.1, CCG026620.1                                                                                                                                                                                                                                           |
| GO:0009108 | coenzyme biosynthetic process                         | 20 of 4104 in the list | 43 of 8404 in the genome | 1 | CCG000682.1, CCG010561.1, CCG003683.2, CCG026812.1, CCG021086.2, CCG011491.1, CCG023780.2, CCG003173.1, CCG013999.1, CCG021336.1, CCG009518.1, CCG004188.3, CCG015943.1, CCG016955.1, CCG024432.2, CCG016148.1, CCG003751.1, CCG006009.1, CCG020441.1, CCG010319.1 |
| GO:0044262 | cellular carbohydrate metabolic process               | 20 of 4104 in the list | 43 of 8404 in the genome | 1 | CCG010996.1, CCG005588.1, CCG013318.1, CCG011547.1, CCG019693.1, CCG016653.1, CCG008317.1, CCG008130.1, CCG015587.1, CCG022430.1, CCG004760.1, CCG006358.1, CCG014260.1, CCG023757.1, CCG005177.1, CCG014174.1, CCG019825.2, CCG024762.1, CCG025015.2, CCG013129.1 |

|            |                                      |                         |                           |   |                                                                                                                                                                                                                                                                                                                                                                                                                                                                                                                                                                                                                                                                                                                                                                                                                                                                                                                                                                                                                                                                                                                                                                                                                                                                                                                                                                                                                                                                                                                                                                                                                                                                                                                    |
|------------|--------------------------------------|-------------------------|---------------------------|---|--------------------------------------------------------------------------------------------------------------------------------------------------------------------------------------------------------------------------------------------------------------------------------------------------------------------------------------------------------------------------------------------------------------------------------------------------------------------------------------------------------------------------------------------------------------------------------------------------------------------------------------------------------------------------------------------------------------------------------------------------------------------------------------------------------------------------------------------------------------------------------------------------------------------------------------------------------------------------------------------------------------------------------------------------------------------------------------------------------------------------------------------------------------------------------------------------------------------------------------------------------------------------------------------------------------------------------------------------------------------------------------------------------------------------------------------------------------------------------------------------------------------------------------------------------------------------------------------------------------------------------------------------------------------------------------------------------------------|
| GO:0035556 | intracellular signal transduction    | 118 of 4104 in the list | 248 of 8404 in the genome | 1 | CCG015638. 1, CCG000789. 1, CCG017420. 1, CCG002549. 1, CCG007434. 1, CCG019820. 1, CCG007060. 1, CCG023484. 1, CCG026047. 1, CCG008603. 1, CCG028124. 1, CCG022332. 1, CCG009446. 1, CCG013998. 1, CCG024327. 1, CCG015386. 1, CCG019020. 1, CCG013398. 1, CCG026174. 1, CCG000016. 1, CCG017725. 1, CCG025387. 1, CCG009607. 1, CCG011006. 1, CCG026360. 1, CCG007827. 1, CCG014434. 1, CCG028477. 1, CCG011717. 1, CCG025899. 1, CCG012573. 1, CCG018861. 1, CCG016878. 1, CCG025027. 1, CCG012702. 1, CCG022841. 1, CCG020709. 1, CCG014466. 1, CCG008035. 1, CCG019420. 2, CCG015426. 1, CCG007993. 1, CCG019103. 1, CCG013365. 1, CCG019629. 2, CCG002917. 1, CCG011658. 1, CCG018341. 1, CCG007335. 1, CCG002133. 1, CCG002341. 1, CCG020909. 1, CCG018447. 1, CCG016966. 1, CCG021661. 1, CCG010944. 1, CCG012959. 1, CCG013308. 1, CCG009510. 1, CCG018222. 1, CCG002413. 1, CCG025179. 1, CCG019558. 1, CCG024595. 1, CCG006777. 1, CCG010046. 1, CCG014379. 1, CCG012402. 1, CCG007587. 1, CCG024840. 1, CCG025973. 1, CCG002902. 1, CCG024952. 1, CCG020929. 1, CCG014647. 1, CCG023393. 1, CCG015984. 1, CCG009980. 1, CCG014506. 1, CCG001012. 1, CCG016252. 1, CCG007830. 1, CCG008892. 2, CCG003775. 1, CCG008152. 1, CCG004869. 1, CCG017373. 1, CCG026953. 1, CCG006924. 1, CCG021220. 1, CCG011087. 1, CCG017591. 1, CCG024583. 1, CCG001579. 1, CCG028136. 1, CCG013641. 1, CCG016027. 1, CCG003495. 1, CCG021411. 1, CCG017127. 1, CCG026898. 1, CCG001859. 1, CCG026336. 1, CCG006412. 1, CCG025131. 2, CCG016542. 1, CCG026154. 1, CCG015654. 1, CCG014837. 1, CCG008652. 1, CCG022184. 1, CCG028486. 1, CCG027309. 1, CCG008185. 1, CCG021152. 1, CCG023526. 2, CCG026695. 1, CCG016660. 1 |
| GO:0033043 | regulation of organelle organization | 6 of 4104 in the list   | 13 of 8404 in the genome  | 1 | CCG004331. 1, CCG025026. 1, CCG002269. 1, CCG027068. 1, CCG019102. 1, CCG018116. 1                                                                                                                                                                                                                                                                                                                                                                                                                                                                                                                                                                                                                                                                                                                                                                                                                                                                                                                                                                                                                                                                                                                                                                                                                                                                                                                                                                                                                                                                                                                                                                                                                                 |
| GO:0016055 | Wnt signaling pathway                | 5 of 4104 in the list   | 11 of 8404 in the genome  | 1 | CCG015544. 1, CCG007152. 1, CCG002694. 1, CCG025782. 1, CCG020733. 1                                                                                                                                                                                                                                                                                                                                                                                                                                                                                                                                                                                                                                                                                                                                                                                                                                                                                                                                                                                                                                                                                                                                                                                                                                                                                                                                                                                                                                                                                                                                                                                                                                               |
| GO:0006662 | glycerol ether metabolic process     | 9 of 4104 in the list   | 20 of 8404 in the genome  | 1 | CCG026500. 1, CCG002466. 1, CCG006600. 1, CCG012992. 1, CCG020472. 1, CCG021250. 1, CCG020637. 1, CCG001847. 1, CCG012678. 1                                                                                                                                                                                                                                                                                                                                                                                                                                                                                                                                                                                                                                                                                                                                                                                                                                                                                                                                                                                                                                                                                                                                                                                                                                                                                                                                                                                                                                                                                                                                                                                       |
| GO:0018904 | ether metabolic process              | 9 of 4104 in the list   | 20 of 8404 in the genome  | 1 | CCG026500. 1, CCG002466. 1, CCG006600. 1, CCG012992. 1, CCG020472. 1, CCG021250. 1, CCG020637. 1, CCG001847. 1, CCG012678. 1                                                                                                                                                                                                                                                                                                                                                                                                                                                                                                                                                                                                                                                                                                                                                                                                                                                                                                                                                                                                                                                                                                                                                                                                                                                                                                                                                                                                                                                                                                                                                                                       |
| GO:0048869 | cellular developmental process       | 4 of 4104 in the list   | 9 of 8404 in the genome   | 1 | CCG015767. 2, CCG021681. 1, CCG006750. 1, CCG013272. 2                                                                                                                                                                                                                                                                                                                                                                                                                                                                                                                                                                                                                                                                                                                                                                                                                                                                                                                                                                                                                                                                                                                                                                                                                                                                                                                                                                                                                                                                                                                                                                                                                                                             |

|            |                                       |                         |                            |   |                                                                                                                                                                                                                                                                                                                                                                                                                                                                                                                                                                                                                                                                                                                                                                                                                                                                                                                                                                                                                                                                                                                                                                                                                                                                                                                                                                                                                                                                                                                                                                                                                                                                                                                                                                                                                                                                                                                                                                   |
|------------|---------------------------------------|-------------------------|----------------------------|---|-------------------------------------------------------------------------------------------------------------------------------------------------------------------------------------------------------------------------------------------------------------------------------------------------------------------------------------------------------------------------------------------------------------------------------------------------------------------------------------------------------------------------------------------------------------------------------------------------------------------------------------------------------------------------------------------------------------------------------------------------------------------------------------------------------------------------------------------------------------------------------------------------------------------------------------------------------------------------------------------------------------------------------------------------------------------------------------------------------------------------------------------------------------------------------------------------------------------------------------------------------------------------------------------------------------------------------------------------------------------------------------------------------------------------------------------------------------------------------------------------------------------------------------------------------------------------------------------------------------------------------------------------------------------------------------------------------------------------------------------------------------------------------------------------------------------------------------------------------------------------------------------------------------------------------------------------------------------|
| GO:0090304 | nucleic acid metabolic process        | 623 of 4104 in the list | 1295 of 8404 in the genome | 1 | CCG027300. 1, CCG014396. 1, CCG006549. 1, CCG026106. 1, CCG006357. 1, CCG009878. 1, CCG024072. 1, CCG020685. 1, CCG013625. 1, CCG004468. 1, CCG016238. 1, CCG024584. 1, CCG001292. 1, CCG018321. 1, CCG002470. 1, CCG005194. 1, CCG001040. 1, CCG014836. 1, CCG025208. 1, CCG019382. 1, CCG016094. 1, CCG027183. 2, CCG023474. 1, CCG010792. 1, CCG004231. 1, CCG012623. 1, CCG010905. 1, CCG010909. 1, CCG023129. 1, CCG028653. 1, CCG024326. 1, CCG014946. 1, CCG020286. 1, CCG002735. 1, CCG027133. 1, CCG014280. 1, CCG015694. 1, CCG013865. 1, CCG006484. 1, CCG001461. 1, CCG023686. 1, CCG004402. 1, CCG003938. 1, CCG023468. 1, CCG025990. 1, CCG015350. 1, CCG021948. 1, CCG011148. 1, CCG020651. 1, CCG005284. 1, CCG004927. 1, CCG009805. 2, CCG019545. 1, CCG003142. 1, CCG021137. 1, CCG001876. 1, CCG012584. 1, CCG024200. 1, CCG010624. 1, CCG023125. 1, CCG016381. 1, CCG011727. 1, CCG017001. 1, CCG024788. 1, CCG007263. 1, CCG021767. 1, CCG004926. 1, CCG004907. 1, CCG010912. 1, CCG004955. 1, CCG015367. 1, CCG005524. 1, CCG024857. 1, CCG022772. 1, CCG010136. 1, CCG005501. 1, CCG003310. 1, CCG026516. 1, CCG024570. 2, CCG018164. 1, CCG013617. 1, CCG004224. 1, CCG022513. 2, CCG028092. 1, CCG018650. 1, CCG000209. 1, CCG016760. 1, CCG021521. 1, CCG007902. 1, CCG023486. 1, CCG024232. 1, CCG006133. 1, CCG001395. 1, CCG016557. 1, CCG023184. 1, CCG003153. 1, CCG005594. 1, CCG027340. 1, CCG022183. 1, CCG018168. 1, CCG018796. 1, CCG011015. 1, CCG008498. 1, CCG000073. 1, CCG012278. 1, CCG005070. 1, CCG001898. 1, CCG005241. 1, CCG010906. 1, CCG008044. 1, CCG010797. 1, CCG004008. 1, CCG010138. 1, CCG008916. 1, CCG012557. 1, CCG013054. 1, CCG021716. 1, CCG012837. 1, CCG012229. 1, CCG002662. 1, CCG021042. 1, CCG023939. 1, CCG000929. 1, CCG000208. 1, CCG007177. 1, CCG015312. 2, CCG000490. 1, CCG027040. 1, CCG027197. 1, CCG025157. 1, CCG028027. 1, CCG005269. 1, CCG022674. 1, CCG003940. 1, CCG027695. 1, |
| GO:0006650 | glycerophospholipid metabolic process | 26 of 4104 in the list  | 57 of 8404 in the genome   | 1 | CCG000789. 1, CCG025233. 1, CCG022209. 1, CCG017241. 1, CCG024778. 1, CCG019820. 1, CCG023393. 1, CCG009434. 1, CCG014839. 1, CCG000663. 1, CCG013131. 1, CCG026370. 1, CCG011658. 1, CCG025889. 1, CCG004806. 1, CCG000552. 1, CCG024760. 1, CCG024903. 1, CCG012875. 1, CCG028332. 1, CCG007330. 1, CCG012959. 1, CCG015130. 1, CCG011531. 1, CCG024612. 1, CCG021610. 1                                                                                                                                                                                                                                                                                                                                                                                                                                                                                                                                                                                                                                                                                                                                                                                                                                                                                                                                                                                                                                                                                                                                                                                                                                                                                                                                                                                                                                                                                                                                                                                        |

|            |                                                      |                        |                          |   |                                                                                                                                                                                                                                                                                                                                                                                                                                                                                                              |
|------------|------------------------------------------------------|------------------------|--------------------------|---|--------------------------------------------------------------------------------------------------------------------------------------------------------------------------------------------------------------------------------------------------------------------------------------------------------------------------------------------------------------------------------------------------------------------------------------------------------------------------------------------------------------|
| GO:0046486 | glycerolipid metabolic process                       | 26 of 4104 in the list | 57 of 8404 in the genome | 1 | CCG000789.1, CCG025233.1, CCG022209.1, CCG017241.1, CCG024778.1, CCG019820.1, CCG023393.1, CCG009434.1, CCG014839.1, CCG000663.1, CCG013131.1, CCG026370.1, CCG011658.1, CCG025889.1, CCG004806.1, CCG000552.1, CCG024760.1, CCG024903.1, CCG012875.1, CCG028332.1, CCG007330.1, CCG012959.1, CCG015130.1, CCG011531.1, CCG024612.1, CCG021610.1                                                                                                                                                             |
| GO:0006818 | hydrogen transport                                   | 24 of 4104 in the list | 53 of 8404 in the genome | 1 | CCG015410.1, CCG002038.1, CCG025107.1, CCG009142.1, CCG023640.1, CCG010696.1, CCG000148.1, CCG000585.1, CCG025348.1, CCG003662.1, CCG025989.2, CCG012534.1, CCG006486.1, CCG019619.1, CCG005924.2, CCG008422.1, CCG025450.1, CCG010112.1, CCG001066.1, CCG019678.1, CCG007724.1, CCG021934.1, CCG013643.1, CCG001285.1                                                                                                                                                                                       |
| GO:0015992 | proton transport                                     | 24 of 4104 in the list | 53 of 8404 in the genome | 1 | CCG015410.1, CCG002038.1, CCG025107.1, CCG009142.1, CCG023640.1, CCG010696.1, CCG000148.1, CCG000585.1, CCG025348.1, CCG003662.1, CCG025989.2, CCG012534.1, CCG006486.1, CCG019619.1, CCG005924.2, CCG008422.1, CCG025450.1, CCG010112.1, CCG001066.1, CCG019678.1, CCG007724.1, CCG021934.1, CCG013643.1, CCG001285.1                                                                                                                                                                                       |
| GO:0046488 | phosphatidylinositol metabolic process               | 24 of 4104 in the list | 53 of 8404 in the genome | 1 | CCG000789.1, CCG025233.1, CCG022209.1, CCG017241.1, CCG024778.1, CCG019820.1, CCG023393.1, CCG009434.1, CCG014839.1, CCG000663.1, CCG013131.1, CCG026370.1, CCG011658.1, CCG025889.1, CCG004806.1, CCG000552.1, CCG024760.1, CCG024903.1, CCG028332.1, CCG007330.1, CCG012959.1, CCG015130.1, CCG011531.1, CCG024612.1                                                                                                                                                                                       |
| GO:0006644 | phospholipid metabolic process                       | 38 of 4104 in the list | 83 of 8404 in the genome | 1 | CCG004532.1, CCG000789.1, CCG019820.1, CCG023393.1, CCG000663.1, CCG013131.1, CCG026370.1, CCG015351.1, CCG004806.1, CCG024092.1, CCG022352.1, CCG012875.1, CCG007330.1, CCG015130.1, CCG011531.1, CCG021610.1, CCG024155.1, CCG023102.1, CCG025233.1, CCG017241.1, CCG022209.1, CCG024778.1, CCG014839.1, CCG009434.1, CCG012308.1, CCG016653.1, CCG025889.1, CCG011658.1, CCG000552.1, CCG024903.1, CCG024760.1, CCG028332.1, CCG023757.1, CCG012959.1, CCG006965.1, CCG014174.1, CCG019697.2, CCG024612.1 |
| GO:0000042 | protein targeting to Golgi                           | 3 of 4104 in the list  | 7 of 8404 in the genome  | 1 | CCG012550.1, CCG004573.1, CCG028498.1                                                                                                                                                                                                                                                                                                                                                                                                                                                                        |
| GO:0000301 | retrograde transport, vesicle recycling within Golgi | 3 of 4104 in the list  | 7 of 8404 in the genome  | 1 | CCG012550.1, CCG004573.1, CCG028498.1                                                                                                                                                                                                                                                                                                                                                                                                                                                                        |
| GO:0009452 | 7-methylguanosine RNA capping                        | 3 of 4104 in the list  | 7 of 8404 in the genome  | 1 | CCG014335.1, CCG007177.1, CCG012557.1                                                                                                                                                                                                                                                                                                                                                                                                                                                                        |



|            |                                                  |                        |                           |   |                                                                                                                                                                                                                                                                                                                                                                                                                                                                                                                                                                                                                                                                                                                                                                                                                                                                                                                                 |
|------------|--------------------------------------------------|------------------------|---------------------------|---|---------------------------------------------------------------------------------------------------------------------------------------------------------------------------------------------------------------------------------------------------------------------------------------------------------------------------------------------------------------------------------------------------------------------------------------------------------------------------------------------------------------------------------------------------------------------------------------------------------------------------------------------------------------------------------------------------------------------------------------------------------------------------------------------------------------------------------------------------------------------------------------------------------------------------------|
| GO:0015936 | coenzyme A metabolic process                     | 3 of 4104 in the list  | 7 of 8404 in the genome   | 1 | CCG021336.1, CCG013999.1, CCG026812.1                                                                                                                                                                                                                                                                                                                                                                                                                                                                                                                                                                                                                                                                                                                                                                                                                                                                                           |
| GO:0033865 | nucleoside bisphosphate metabolic process        | 3 of 4104 in the list  | 7 of 8404 in the genome   | 1 | CCG021336.1, CCG013999.1, CCG026812.1                                                                                                                                                                                                                                                                                                                                                                                                                                                                                                                                                                                                                                                                                                                                                                                                                                                                                           |
| GO:0033875 | ribonucleoside bisphosphate metabolic process    | 3 of 4104 in the list  | 7 of 8404 in the genome   | 1 | CCG021336.1, CCG013999.1, CCG026812.1                                                                                                                                                                                                                                                                                                                                                                                                                                                                                                                                                                                                                                                                                                                                                                                                                                                                                           |
| GO:0034032 | purine nucleoside bisphosphate metabolic process | 3 of 4104 in the list  | 7 of 8404 in the genome   | 1 | CCG021336.1, CCG013999.1, CCG026812.1                                                                                                                                                                                                                                                                                                                                                                                                                                                                                                                                                                                                                                                                                                                                                                                                                                                                                           |
| GO:0034067 | protein localization to Golgi apparatus          | 3 of 4104 in the list  | 7 of 8404 in the genome   | 1 | CCG012550.1, CCG004573.1, CCG028498.1                                                                                                                                                                                                                                                                                                                                                                                                                                                                                                                                                                                                                                                                                                                                                                                                                                                                                           |
| GO:0036260 | RNA capping                                      | 3 of 4104 in the list  | 7 of 8404 in the genome   | 1 | CCG014335.1, CCG007177.1, CCG012557.1                                                                                                                                                                                                                                                                                                                                                                                                                                                                                                                                                                                                                                                                                                                                                                                                                                                                                           |
| GO:0072600 | establishment of protein localization to Golgi   | 3 of 4104 in the list  | 7 of 8404 in the genome   | 1 | CCG012550.1, CCG004573.1, CCG028498.1                                                                                                                                                                                                                                                                                                                                                                                                                                                                                                                                                                                                                                                                                                                                                                                                                                                                                           |
| GO:0006040 | amino sugar metabolic process                    | 69 of 4104 in the list | 149 of 8404 in the genome | 1 | CCG010077.1, CCG006912.1, CCG017730.1, CCG005809.1, CCG021005.1, CCG020504.1, CCG007817.1, CCG004020.1, CCG016477.1, CCG012048.1, CCG011695.1, CCG007816.1, CCG015610.1, CCG020165.1, CCG023922.1, CCG007814.1, CCG020793.1, CCG006911.1, CCG022378.1, CCG023890.1, CCG006375.1, CCG026626.1, CCG017079.1, CCG023923.1, CCG019371.1, CCG014180.1, CCG012984.1, CCG003601.1, CCG010019.1, CCG003966.1, CCG014791.1, CCG016153.1, CCG011972.1, CCG015090.1, CCG010728.1, CCG002418.1, CCG019402.1, CCG025948.4, CCG023926.1, CCG017862.1, CCG022227.1, CCG019785.1, CCG001154.1, CCG012725.1, CCG016069.1, CCG021117.1, CCG023924.1, CCG025962.1, CCG014181.1, CCG000044.1, CCG013298.1, CCG023925.1, CCG011257.1, CCG018642.1, CCG015306.1, CCG015029.1, CCG026044.1, CCG007963.1, CCG015804.1, CCG024829.1, CCG018643.1, CCG002417.1, CCG026552.1, CCG023420.1, CCG010727.1, CCG020663.1, CCG028454.1, CCG011996.1, CCG028648.1 |

|            |                                                   |                        |                           |   |                                                                                                                                                                                                                                                                                                                                                                                                                                                                                                                                                                                                                                                                                                                                                                                                                                                                                                                                                                                                     |
|------------|---------------------------------------------------|------------------------|---------------------------|---|-----------------------------------------------------------------------------------------------------------------------------------------------------------------------------------------------------------------------------------------------------------------------------------------------------------------------------------------------------------------------------------------------------------------------------------------------------------------------------------------------------------------------------------------------------------------------------------------------------------------------------------------------------------------------------------------------------------------------------------------------------------------------------------------------------------------------------------------------------------------------------------------------------------------------------------------------------------------------------------------------------|
| GO:1901071 | glucosamine-containing compound metabolic process | 69 of 4104 in the list | 149 of 8404 in the genome | 1 | CCG010077. 1, CCG006912. 1, CCG017730. 1, CCG005809. 1, CCG021005. 1, CCG020504. 1, CCG007817. 1, CCG004020. 1, CCG016477. 1, CCG012048. 1, CCG011695. 1, CCG007816. 1, CCG015610. 1, CCG020165. 1, CCG023922. 1, CCG007814. 1, CCG020793. 1, CCG006911. 1, CCG022378. 1, CCG023890. 1, CCG006375. 1, CCG026626. 1, CCG017079. 1, CCG023923. 1, CCG019371. 1, CCG014180. 1, CCG012984. 1, CCG003601. 1, CCG010019. 1, CCG003966. 1, CCG014791. 1, CCG016153. 1, CCG011972. 1, CCG015090. 1, CCG010728. 1, CCG002418. 1, CCG019402. 1, CCG025948. 4, CCG023926. 1, CCG017862. 1, CCG02227. 1, CCG019785. 1, CCG001154. 1, CCG012725. 1, CCG016069. 1, CCG021117. 1, CCG023924. 1, CCG025962. 1, CCG014181. 1, CCG000044. 1, CCG013298. 1, CCG023925. 1, CCG011257. 1, CCG018642. 1, CCG015306. 1, CCG015029. 1, CCG026044. 1, CCG007963. 1, CCG015804. 1, CCG024829. 1, CCG018643. 1, CCG002417. 1, CCG026552. 1, CCG023420. 1, CCG010727. 1, CCG020663. 1, CCG028454. 1, CCG011996. 1, CCG028648. 1 |
|------------|---------------------------------------------------|------------------------|---------------------------|---|-----------------------------------------------------------------------------------------------------------------------------------------------------------------------------------------------------------------------------------------------------------------------------------------------------------------------------------------------------------------------------------------------------------------------------------------------------------------------------------------------------------------------------------------------------------------------------------------------------------------------------------------------------------------------------------------------------------------------------------------------------------------------------------------------------------------------------------------------------------------------------------------------------------------------------------------------------------------------------------------------------|

|            |                                                     |                         |                           |   |                                                                                                                                                                                                                                                                                                                                                                                                                                                                                                                                                                                                                                                                                                                                                                                                                                                                                                                                                                                                                                                                                                                                                                                                                                                                                                                                                                                                                                                                                                                                                                                                                                                                                                                                                                                                                                                                                                                                                                   |
|------------|-----------------------------------------------------|-------------------------|---------------------------|---|-------------------------------------------------------------------------------------------------------------------------------------------------------------------------------------------------------------------------------------------------------------------------------------------------------------------------------------------------------------------------------------------------------------------------------------------------------------------------------------------------------------------------------------------------------------------------------------------------------------------------------------------------------------------------------------------------------------------------------------------------------------------------------------------------------------------------------------------------------------------------------------------------------------------------------------------------------------------------------------------------------------------------------------------------------------------------------------------------------------------------------------------------------------------------------------------------------------------------------------------------------------------------------------------------------------------------------------------------------------------------------------------------------------------------------------------------------------------------------------------------------------------------------------------------------------------------------------------------------------------------------------------------------------------------------------------------------------------------------------------------------------------------------------------------------------------------------------------------------------------------------------------------------------------------------------------------------------------|
| GO:0007154 | cell communication                                  | 332 of 4104 in the list | 698 of 8404 in the genome | 1 | CCG005254. 1, CCG010628. 1, CCG017420. 1, CCG028253. 1, CCG014340. 1, CCG012989. 1, CCG008603. 1, CCG008741. 1, CCG027955. 1, CCG000646. 1, CCG019020. 1, CCG013398. 1, CCG026174. 1, CCG020785. 1, CCG011006. 1, CCG002841. 1, CCG010275. 1, CCG026360. 1, CCG011717. 1, CCG017266. 1, CCG012573. 1, CCG016689. 2, CCG016745. 1, CCG020709. 1, CCG014466. 1, CCG007993. 1, CCG015101. 1, CCG000659. 1, CCG009407. 1, CCG027127. 1, CCG007335. 1, CCG018533. 1, CCG000647. 1, CCG000526. 1, CCG022281. 1, CCG027669. 1, CCG015967. 1, CCG008323. 1, CCG026537. 1, CCG021661. 1, CCG010071. 1, CCG013308. 1, CCG023579. 1, CCG009510. 1, CCG019717. 1, CCG025176. 1, CCG000078. 1, CCG008685. 1, CCG026109. 1, CCG024952. 1, CCG009980. 1, CCG014506. 1, CCG016252. 1, CCG004279. 1, CCG024663. 1, CCG003745. 1, CCG018494. 1, CCG008759. 1, CCG026953. 1, CCG009427. 1, CCG019493. 1, CCG017498. 1, CCG002520. 1, CCG017591. 1, CCG023464. 1, CCG021284. 1, CCG001579. 1, CCG028136. 1, CCG011437. 1, CCG013641. 1, CCG000732. 1, CCG003317. 1, CCG003495. 1, CCG017127. 1, CCG007951. 1, CCG006412. 1, CCG025131. 2, CCG016307. 1, CCG008444. 1, CCG017701. 1, CCG000515. 1, CCG028486. 1, CCG000834. 1, CCG018859. 3, CCG026695. 1, CCG014712. 1, CCG000876. 1, CCG014928. 1, CCG024664. 1, CCG015638. 1, CCG000789. 1, CCG024271. 1, CCG024662. 1, CCG026047. 1, CCG020978. 1, CCG008939. 1, CCG007732. 3, CCG005531. 1, CCG017725. 1, CCG000111. 2, CCG014345. 2, CCG001759. 1, CCG028477. 1, CCG025899. 1, CCG019881. 1, CCG025035. 1, CCG000984. 1, CCG024639. 1, CCG020654. 1, CCG015793. 1, CCG015426. 1, CCG006804. 1, CCG023151. 1, CCG014509. 1, CCG009553. 1, CCG021902. 1, CCG017033. 1, CCG024918. 1, CCG023002. 1, CCG023662. 1, CCG007958. 1, CCG015583. 1, CCG012959. 1, CCG006013. 1, CCG017112. 1, CCG002413. 1, CCG013272. 2, CCG024595. 1, CCG010046. 1, CCG012402. 1, CCG008742. 1, CCG011228. 1, CCG020929. 1, CCG014647. 1, CCG001012. 1, |
| GO:0006760 | folic acid-containing compound metabolic process    | 5 of 4104 in the list   | 12 of 8404 in the genome  | 1 | CCG011491. 1, CCG000682. 1, CCG010561. 1, CCG020441. 1, CCG015943. 1                                                                                                                                                                                                                                                                                                                                                                                                                                                                                                                                                                                                                                                                                                                                                                                                                                                                                                                                                                                                                                                                                                                                                                                                                                                                                                                                                                                                                                                                                                                                                                                                                                                                                                                                                                                                                                                                                              |
| GO:0009396 | folic acid-containing compound biosynthetic process | 5 of 4104 in the list   | 12 of 8404 in the genome  | 1 | CCG011491. 1, CCG000682. 1, CCG010561. 1, CCG020441. 1, CCG015943. 1                                                                                                                                                                                                                                                                                                                                                                                                                                                                                                                                                                                                                                                                                                                                                                                                                                                                                                                                                                                                                                                                                                                                                                                                                                                                                                                                                                                                                                                                                                                                                                                                                                                                                                                                                                                                                                                                                              |

|            |                      |                         |                            |   |                                                                                                                                                                                                                                                                                                                                                                                                                                                                                                                                                                                                                                                                                                                                                                                                                                                                                                                                                                                                                                                                                                                                                                                                                                                                                                                                                                                                                                                                                                                                                                                                                                                                                                                                                                                                                                                                                                                                                                   |
|------------|----------------------|-------------------------|----------------------------|---|-------------------------------------------------------------------------------------------------------------------------------------------------------------------------------------------------------------------------------------------------------------------------------------------------------------------------------------------------------------------------------------------------------------------------------------------------------------------------------------------------------------------------------------------------------------------------------------------------------------------------------------------------------------------------------------------------------------------------------------------------------------------------------------------------------------------------------------------------------------------------------------------------------------------------------------------------------------------------------------------------------------------------------------------------------------------------------------------------------------------------------------------------------------------------------------------------------------------------------------------------------------------------------------------------------------------------------------------------------------------------------------------------------------------------------------------------------------------------------------------------------------------------------------------------------------------------------------------------------------------------------------------------------------------------------------------------------------------------------------------------------------------------------------------------------------------------------------------------------------------------------------------------------------------------------------------------------------------|
| GO:0009058 | biosynthetic process | 564 of 4104 in the list | 1180 of 8404 in the genome | 1 | CCG014531. 2, CCG014396. 1, CCG006549. 1, CCG013430. 1, CCG009878. 1, CCG024517. 1, CCG026174. 1, CCG004468. 1, CCG016238. 1, CCG001292. 1, CCG016220. 1, CCG018321. 1, CCG013059. 1, CCG002470. 1, CCG025836. 1, CCG025472. 1, CCG018432. 1, CCG025208. 1, CCG026871. 2, CCG012623. 1, CCG022025. 2, CCG005053. 1, CCG000944. 1, CCG008270. 1, CCG021110. 1, CCG024612. 1, CCG005737. 1, CCG024326. 1, CCG020286. 1, CCG016164. 1, CCG016747. 1, CCG021086. 2, CCG014280. 1, CCG008871. 1, CCG015694. 1, CCG013865. 1, CCG018788. 1, CCG006484. 1, CCG026602. 1, CCG006344. 1, CCG021737. 1, CCG023468. 1, CCG006821. 1, CCG015350. 1, CCG003683. 2, CCG021948. 1, CCG011148. 1, CCG020651. 1, CCG012840. 1, CCG001163. 1, CCG000552. 1, CCG023452. 1, CCG009805. 2, CCG002966. 1, CCG019545. 1, CCG003142. 1, CCG021137. 1, CCG013610. 1, CCG001876. 1, CCG009518. 1, CCG024200. 1, CCG002231. 1, CCG023125. 1, CCG016381. 1, CCG011727. 1, CCG026865. 1, CCG027748. 1, CCG022788. 1, CCG017001. 1, CCG000294. 1, CCG004926. 1, CCG004532. 1, CCG017381. 1, CCG015367. 1, CCG026047. 1, CCG024784. 1, CCG011491. 1, CCG009333. 1, CCG005501. 1, CCG007766. 1, CCG009803. 1, CCG018164. 1, CCG004224. 1, CCG010112. 1, CCG028092. 1, CCG000209. 1, CCG021521. 1, CCG007902. 1, CCG024232. 1, CCG024155. 1, CCG007395. 1, CCG023184. 1, CCG019263. 1, CCG010561. 1, CCG015986. 1, CCG018168. 1, CCG000148. 1, CCG019426. 1, CCG025889. 1, CCG018796. 1, CCG009394. 1, CCG024760. 1, CCG026099. 1, CCG025038. 1, CCG025897. 1, CCG006009. 1, CCG010319. 1, CCG017995. 1, CCG008044. 1, CCG010797. 1, CCG010138. 1, CCG026370. 1, CCG009928. 1, CCG005442. 1, CCG008130. 1, CCG003249. 1, CCG017894. 1, CCG007417. 1, CCG021716. 1, CCG007724. 1, CCG002662. 1, CCG017295. 1, CCG023939. 1, CCG008932. 1, CCG017241. 1, CCG021933. 1, CCG026331. 1, CCG027131. 1, CCG015312. 2, CCG015747. 1, CCG000490. 1, CCG027197. 1, CCG025157. 1, CCG005269. 1, CCG018659. 2, |
|------------|----------------------|-------------------------|----------------------------|---|-------------------------------------------------------------------------------------------------------------------------------------------------------------------------------------------------------------------------------------------------------------------------------------------------------------------------------------------------------------------------------------------------------------------------------------------------------------------------------------------------------------------------------------------------------------------------------------------------------------------------------------------------------------------------------------------------------------------------------------------------------------------------------------------------------------------------------------------------------------------------------------------------------------------------------------------------------------------------------------------------------------------------------------------------------------------------------------------------------------------------------------------------------------------------------------------------------------------------------------------------------------------------------------------------------------------------------------------------------------------------------------------------------------------------------------------------------------------------------------------------------------------------------------------------------------------------------------------------------------------------------------------------------------------------------------------------------------------------------------------------------------------------------------------------------------------------------------------------------------------------------------------------------------------------------------------------------------------|

|            |                                                        |                        |                           |   |                                                                                                                                                                                                                                                                                                                                                                                                                                                                                                                                                                                                                                                                                                                                                                                                                                                                                                                                                                                                                                                                                                                                                                                                                                                                                                                                                      |
|------------|--------------------------------------------------------|------------------------|---------------------------|---|------------------------------------------------------------------------------------------------------------------------------------------------------------------------------------------------------------------------------------------------------------------------------------------------------------------------------------------------------------------------------------------------------------------------------------------------------------------------------------------------------------------------------------------------------------------------------------------------------------------------------------------------------------------------------------------------------------------------------------------------------------------------------------------------------------------------------------------------------------------------------------------------------------------------------------------------------------------------------------------------------------------------------------------------------------------------------------------------------------------------------------------------------------------------------------------------------------------------------------------------------------------------------------------------------------------------------------------------------|
| GO:0006886 | intracellular protein transport                        | 93 of 4104 in the list | 201 of 8404 in the genome | 1 | CCG026698. 1, CCG011766. 1, CCG018832. 1, CCG003146. 1, CCG011408. 1, CCG007060. 1, CCG001809. 1, CCG028124. 1, CCG019590. 1, CCG027692. 1, CCG020949. 1, CCG003995. 1, CCG015386. 1, CCG019020. 1, CCG012550. 1, CCG002645. 1, CCG009428. 1, CCG018800. 1, CCG024905. 1, CCG011813. 1, CCG005262. 1, CCG020315. 1, CCG015568. 1, CCG011006. 1, CCG017077. 1, CCG002766. 1, CCG000010. 1, CCG000614. 1, CCG003531. 1, CCG017078. 1, CCG011696. 1, CCG014307. 1, CCG027457. 1, CCG019629. 2, CCG027257. 1, CCG010939. 1, CCG007855. 1, CCG007283. 1, CCG016541. 1, CCG020909. 1, CCG018447. 1, CCG003786. 1, CCG006714. 1, CCG027473. 1, CCG010178. 1, CCG006777. 1, CCG013984. 1, CCG001673. 1, CCG001172. 1, CCG020280. 1, CCG014506. 1, CCG018557. 1, CCG027564. 1, CCG026620. 1, CCG015800. 2, CCG018217. 1, CCG006625. 1, CCG003775. 1, CCG004573. 1, CCG016831. 1, CCG004869. 1, CCG022771. 1, CCG022910. 1, CCG023595. 1, CCG017373. 1, CCG006924. 1, CCG028498. 1, CCG021220. 1, CCG019797. 1, CCG006775. 1, CCG015087. 1, CCG013126. 2, CCG013641. 1, CCG025233. 1, CCG008312. 1, CCG003495. 1, CCG021377. 1, CCG026336. 1, CCG027241. 1, CCG005195. 1, CCG021800. 1, CCG016542. 1, CCG014226. 1, CCG009362. 1, CCG020806. 1, CCG020634. 1, CCG010567. 3, CCG025473. 1, CCG026947. 1, CCG023756. 1, CCG021152. 1, CCG001481. 1, CCG017125. 1 |
| GO:0009628 | response to abiotic stimulus                           | 8 of 4104 in the list  | 19 of 8404 in the genome  | 1 | CCG002446. 2, CCG009531. 1, CCG003657. 2, CCG012989. 1, CCG012988. 1, CCG007317. 1, CCG010071. 1, CCG017696. 1                                                                                                                                                                                                                                                                                                                                                                                                                                                                                                                                                                                                                                                                                                                                                                                                                                                                                                                                                                                                                                                                                                                                                                                                                                       |
| GO:0006597 | spermine biosynthetic process                          | 2 of 4104 in the list  | 5 of 8404 in the genome   | 1 | CCG009515. 2, CCG016005. 1                                                                                                                                                                                                                                                                                                                                                                                                                                                                                                                                                                                                                                                                                                                                                                                                                                                                                                                                                                                                                                                                                                                                                                                                                                                                                                                           |
| GO:0006694 | steroid biosynthetic process                           | 2 of 4104 in the list  | 5 of 8404 in the genome   | 1 | CCG024095. 1, CCG011183. 1                                                                                                                                                                                                                                                                                                                                                                                                                                                                                                                                                                                                                                                                                                                                                                                                                                                                                                                                                                                                                                                                                                                                                                                                                                                                                                                           |
| GO:0006885 | regulation of pH                                       | 2 of 4104 in the list  | 5 of 8404 in the genome   | 1 | CCG023671. 2, CCG016956. 1                                                                                                                                                                                                                                                                                                                                                                                                                                                                                                                                                                                                                                                                                                                                                                                                                                                                                                                                                                                                                                                                                                                                                                                                                                                                                                                           |
| GO:0008215 | spermine metabolic process                             | 2 of 4104 in the list  | 5 of 8404 in the genome   | 1 | CCG009515. 2, CCG016005. 1                                                                                                                                                                                                                                                                                                                                                                                                                                                                                                                                                                                                                                                                                                                                                                                                                                                                                                                                                                                                                                                                                                                                                                                                                                                                                                                           |
| GO:0018202 | peptidyl-histidine modification                        | 2 of 4104 in the list  | 5 of 8404 in the genome   | 1 | CCG022589. 1, CCG013914. 1                                                                                                                                                                                                                                                                                                                                                                                                                                                                                                                                                                                                                                                                                                                                                                                                                                                                                                                                                                                                                                                                                                                                                                                                                                                                                                                           |
| GO:0018342 | protein prenylation                                    | 2 of 4104 in the list  | 5 of 8404 in the genome   | 1 | CCG024801. 1, CCG023181. 1                                                                                                                                                                                                                                                                                                                                                                                                                                                                                                                                                                                                                                                                                                                                                                                                                                                                                                                                                                                                                                                                                                                                                                                                                                                                                                                           |
| GO:0018871 | l-aminocyclopropane-1-carboxylate metabolic process    | 2 of 4104 in the list  | 5 of 8404 in the genome   | 1 | CCG015276. 2, CCG016315. 1                                                                                                                                                                                                                                                                                                                                                                                                                                                                                                                                                                                                                                                                                                                                                                                                                                                                                                                                                                                                                                                                                                                                                                                                                                                                                                                           |
| GO:0035434 | copper ion transmembrane transport                     | 2 of 4104 in the list  | 5 of 8404 in the genome   | 1 | CCG003878. 1, CCG000927. 1                                                                                                                                                                                                                                                                                                                                                                                                                                                                                                                                                                                                                                                                                                                                                                                                                                                                                                                                                                                                                                                                                                                                                                                                                                                                                                                           |
| GO:0042218 | l-aminocyclopropane-1-carboxylate biosynthetic process | 2 of 4104 in the list  | 5 of 8404 in the genome   | 1 | CCG015276. 2, CCG016315. 1                                                                                                                                                                                                                                                                                                                                                                                                                                                                                                                                                                                                                                                                                                                                                                                                                                                                                                                                                                                                                                                                                                                                                                                                                                                                                                                           |

|            |                                         |                        |                           |   |                                                                                                                                                                                                                                                                                                                                                                                                                                                                                                                                                                                                                                                                                                                                                                                                                                                                                                                                                                                                                                                                                                        |
|------------|-----------------------------------------|------------------------|---------------------------|---|--------------------------------------------------------------------------------------------------------------------------------------------------------------------------------------------------------------------------------------------------------------------------------------------------------------------------------------------------------------------------------------------------------------------------------------------------------------------------------------------------------------------------------------------------------------------------------------------------------------------------------------------------------------------------------------------------------------------------------------------------------------------------------------------------------------------------------------------------------------------------------------------------------------------------------------------------------------------------------------------------------------------------------------------------------------------------------------------------------|
| GO:0055067 | monovalent inorganic cation homeostasis | 2 of 4104 in the list  | 5 of 8404 in the genome   | 1 | CCG023671. 2, CCG016956. 1                                                                                                                                                                                                                                                                                                                                                                                                                                                                                                                                                                                                                                                                                                                                                                                                                                                                                                                                                                                                                                                                             |
| GO:0097354 | prenylation                             | 2 of 4104 in the list  | 5 of 8404 in the genome   | 1 | CCG024801. 1, CCG023181. 1                                                                                                                                                                                                                                                                                                                                                                                                                                                                                                                                                                                                                                                                                                                                                                                                                                                                                                                                                                                                                                                                             |
| GO:0006891 | intra-Golgi vesicle-mediated transport  | 4 of 4104 in the list  | 10 of 8404 in the genome  | 1 | CCG012550. 1, CCG011862. 1, CCG004573. 1, CCG028498. 1                                                                                                                                                                                                                                                                                                                                                                                                                                                                                                                                                                                                                                                                                                                                                                                                                                                                                                                                                                                                                                                 |
| GO:0006022 | aminoglycan metabolic process           | 76 of 4104 in the list | 166 of 8404 in the genome | 1 | CCG010077. 1, CCG006912. 1, CCG017730. 1, CCG005809. 1, CCG021005. 1, CCG024517. 1, CCG007817. 1, CCG004020. 1, CCG016477. 1, CCG012048. 1, CCG011695. 1, CCG007816. 1, CCG005029. 1, CCG015610. 1, CCG020799. 1, CCG020165. 1, CCG023922. 1, CCG007814. 1, CCG020793. 1, CCG006911. 1, CCG022378. 1, CCG023890. 1, CCG006375. 1, CCG026626. 1, CCG017079. 1, CCG023923. 1, CCG019371. 1, CCG014180. 1, CCG012984. 1, CCG003601. 1, CCG010019. 1, CCG003966. 1, CCG014791. 1, CCG017559. 1, CCG016153. 1, CCG011972. 1, CCG015090. 1, CCG010728. 1, CCG002418. 1, CCG019402. 1, CCG023926. 1, CCG017862. 1, CCG022227. 1, CCG019785. 1, CCG001154. 1, CCG012725. 1, CCG016069. 1, CCG021117. 1, CCG023924. 1, CCG025962. 1, CCG014181. 1, CCG022072. 1, CCG000044. 1, CCG013298. 1, CCG023925. 1, CCG019470. 1, CCG011257. 1, CCG015907. 1, CCG018642. 1, CCG015306. 1, CCG015029. 1, CCG026044. 1, CCG007963. 1, CCG015804. 1, CCG024829. 1, CCG028235. 1, CCG018643. 1, CCG002417. 1, CCG026552. 1, CCG023420. 1, CCG010727. 1, CCG028454. 1, CCG020663. 1, CCG011996. 1, CCG028648. 1, CCG025840. 1 |
| GO:0006030 | chitin metabolic process                | 67 of 4104 in the list | 147 of 8404 in the genome | 1 | CCG010077. 1, CCG006912. 1, CCG017730. 1, CCG005809. 1, CCG021005. 1, CCG007817. 1, CCG004020. 1, CCG016477. 1, CCG012048. 1, CCG011695. 1, CCG007816. 1, CCG015610. 1, CCG020165. 1, CCG023922. 1, CCG007814. 1, CCG020793. 1, CCG006911. 1, CCG022378. 1, CCG023890. 1, CCG006375. 1, CCG026626. 1, CCG017079. 1, CCG023923. 1, CCG019371. 1, CCG014180. 1, CCG012984. 1, CCG010019. 1, CCG003601. 1, CCG003966. 1, CCG014791. 1, CCG016153. 1, CCG011972. 1, CCG015090. 1, CCG002418. 1, CCG010728. 1, CCG019402. 1, CCG023926. 1, CCG017862. 1, CCG022227. 1, CCG019785. 1, CCG001154. 1, CCG012725. 1, CCG016069. 1, CCG021117. 1, CCG023924. 1, CCG025962. 1, CCG014181. 1, CCG013298. 1, CCG000044. 1, CCG023925. 1, CCG011257. 1, CCG018642. 1, CCG015306. 1, CCG015029. 1, CCG026044. 1, CCG007963. 1, CCG015804. 1, CCG024829. 1, CCG018643. 1, CCG002417. 1, CCG026552. 1, CCG023420. 1, CCG010727. 1, CCG028454. 1, CCG020663. 1, CCG028454. 1, CCG011996. 1, CCG028648. 1                                                                                                                 |

|            |                               |                        |                           |   |                                                                                                                                                                                                                                                                                                                                                                                                                                                                                                                                                                                                                                                                                                                                                                                                                                                                                                                                                                                                                                                                                                                                                                                                                                                                                                                                                                                                              |
|------------|-------------------------------|------------------------|---------------------------|---|--------------------------------------------------------------------------------------------------------------------------------------------------------------------------------------------------------------------------------------------------------------------------------------------------------------------------------------------------------------------------------------------------------------------------------------------------------------------------------------------------------------------------------------------------------------------------------------------------------------------------------------------------------------------------------------------------------------------------------------------------------------------------------------------------------------------------------------------------------------------------------------------------------------------------------------------------------------------------------------------------------------------------------------------------------------------------------------------------------------------------------------------------------------------------------------------------------------------------------------------------------------------------------------------------------------------------------------------------------------------------------------------------------------|
| GO:0055065 | metal ion homeostasis         | 10 of 4104 in the list | 24 of 8404 in the genome  | 1 | CCG000302. 1, CCG016162. 1, CCG009992. 1, CCG026796. 1, CCG003104. 1, CCG020400. 2, CCG008826. 1, CCG024590. 1, CCG012569. 1, CCG020377. 1                                                                                                                                                                                                                                                                                                                                                                                                                                                                                                                                                                                                                                                                                                                                                                                                                                                                                                                                                                                                                                                                                                                                                                                                                                                                   |
| GO:0034613 | cellular protein localization | 97 of 4104 in the list | 211 of 8404 in the genome | 1 | CCG026698. 1, CCG011766. 1, CCG018832. 1, CCG003146. 1, CCG011408. 1, CCG007060. 1, CCG001809. 1, CCG028124. 1, CCG019590. 1, CCG027692. 1, CCG020949. 1, CCG003995. 1, CCG015386. 1, CCG019020. 1, CCG012550. 1, CCG002645. 1, CCG009428. 1, CCG018800. 1, CCG007941. 1, CCG024905. 1, CCG011813. 1, CCG003587. 1, CCG005262. 1, CCG020315. 1, CCG015568. 1, CCG011006. 1, CCG017077. 1, CCG002766. 1, CCG000010. 1, CCG000614. 1, CCG003531. 1, CCG017078. 1, CCG011696. 1, CCG014307. 1, CCG027457. 1, CCG014318. 1, CCG019629. 2, CCG027257. 1, CCG010939. 1, CCG007855. 1, CCG007283. 1, CCG016541. 1, CCG020909. 1, CCG018447. 1, CCG003786. 1, CCG006714. 1, CCG027473. 1, CCG010178. 1, CCG006777. 1, CCG013984. 1, CCG001673. 1, CCG001172. 1, CCG020280. 1, CCG014506. 1, CCG018557. 1, CCG027564. 1, CCG026620. 1, CCG015800. 2, CCG018217. 1, CCG006625. 1, CCG003775. 1, CCG004573. 1, CCG016831. 1, CCG004869. 1, CCG022771. 1, CCG022910. 1, CCG023595. 1, CCG017373. 1, CCG006924. 1, CCG028498. 1, CCG021220. 1, CCG019797. 1, CCG006775. 1, CCG015087. 1, CCG013126. 2, CCG027323. 1, CCG013641. 1, CCG025233. 1, CCG008312. 1, CCG003495. 1, CCG021377. 1, CCG026336. 1, CCG027241. 1, CCG005195. 1, CCG021800. 1, CCG016542. 1, CCG014226. 1, CCG009362. 1, CCG020806. 1, CCG020634. 1, CCG010567. 3, CCG025473. 1, CCG026947. 1, CCG023756. 1, CCG021152. 1, CCG001481. 1, CCG017125. 1 |

|            |                                           |                        |                           |   |                                                                                                                                                                                                                                                                                                                                                                                                                                                                                                                                                                                                                                                                                                                                                                                                                                                                                                                                                                                                                                                                                                                                                                                                                                                                                                                                                                                                              |
|------------|-------------------------------------------|------------------------|---------------------------|---|--------------------------------------------------------------------------------------------------------------------------------------------------------------------------------------------------------------------------------------------------------------------------------------------------------------------------------------------------------------------------------------------------------------------------------------------------------------------------------------------------------------------------------------------------------------------------------------------------------------------------------------------------------------------------------------------------------------------------------------------------------------------------------------------------------------------------------------------------------------------------------------------------------------------------------------------------------------------------------------------------------------------------------------------------------------------------------------------------------------------------------------------------------------------------------------------------------------------------------------------------------------------------------------------------------------------------------------------------------------------------------------------------------------|
| GO:0070727 | cellular macromolecule localization       | 97 of 4104 in the list | 211 of 8404 in the genome | 1 | CCG026698. 1, CCG011766. 1, CCG018832. 1, CCG003146. 1, CCG011408. 1, CCG007060. 1, CCG001809. 1, CCG028124. 1, CCG019590. 1, CCG027692. 1, CCG020949. 1, CCG003995. 1, CCG015386. 1, CCG019020. 1, CCG012550. 1, CCG002645. 1, CCG009428. 1, CCG018800. 1, CCG007941. 1, CCG024905. 1, CCG011813. 1, CCG003587. 1, CCG005262. 1, CCG020315. 1, CCG015568. 1, CCG011006. 1, CCG017077. 1, CCG002766. 1, CCG000010. 1, CCG000614. 1, CCG003531. 1, CCG017078. 1, CCG011696. 1, CCG014307. 1, CCG027457. 1, CCG014318. 1, CCG019629. 2, CCG027257. 1, CCG010939. 1, CCG007855. 1, CCG007283. 1, CCG016541. 1, CCG020909. 1, CCG018447. 1, CCG003786. 1, CCG006714. 1, CCG027473. 1, CCG010178. 1, CCG006777. 1, CCG013984. 1, CCG001673. 1, CCG001172. 1, CCG020280. 1, CCG014506. 1, CCG018557. 1, CCG027564. 1, CCG026620. 1, CCG015800. 2, CCG018217. 1, CCG006625. 1, CCG003775. 1, CCG004573. 1, CCG016831. 1, CCG004869. 1, CCG022771. 1, CCG022910. 1, CCG023595. 1, CCG017373. 1, CCG006924. 1, CCG028498. 1, CCG021220. 1, CCG019797. 1, CCG006775. 1, CCG015087. 1, CCG013126. 2, CCG027323. 1, CCG013641. 1, CCG025233. 1, CCG008312. 1, CCG003495. 1, CCG021377. 1, CCG026336. 1, CCG027241. 1, CCG005195. 1, CCG021800. 1, CCG016542. 1, CCG014226. 1, CCG009362. 1, CCG020806. 1, CCG020634. 1, CCG010567. 3, CCG025473. 1, CCG026947. 1, CCG023756. 1, CCG021152. 1, CCG001481. 1, CCG017125. 1 |
| GO:0006733 | oxidoreduction coenzyme metabolic process | 6 of 4104 in the list  | 15 of 8404 in the genome  | 1 | CCG003748. 1, CCG006009. 1, CCG009518. 1, CCG004188. 3, CCG025307. 1, CCG009084. 2                                                                                                                                                                                                                                                                                                                                                                                                                                                                                                                                                                                                                                                                                                                                                                                                                                                                                                                                                                                                                                                                                                                                                                                                                                                                                                                           |
| GO:0006873 | cellular ion homeostasis                  | 9 of 4104 in the list  | 22 of 8404 in the genome  | 1 | CCG000302. 1, CCG009992. 1, CCG026796. 1, CCG003104. 1, CCG020400. 2, CCG008826. 1, CCG024590. 1, CCG012569. 1, CCG020377. 1                                                                                                                                                                                                                                                                                                                                                                                                                                                                                                                                                                                                                                                                                                                                                                                                                                                                                                                                                                                                                                                                                                                                                                                                                                                                                 |
| GO:0006875 | cellular metal ion homeostasis            | 9 of 4104 in the list  | 22 of 8404 in the genome  | 1 | CCG000302. 1, CCG009992. 1, CCG026796. 1, CCG003104. 1, CCG020400. 2, CCG008826. 1, CCG024590. 1, CCG012569. 1, CCG020377. 1                                                                                                                                                                                                                                                                                                                                                                                                                                                                                                                                                                                                                                                                                                                                                                                                                                                                                                                                                                                                                                                                                                                                                                                                                                                                                 |
| GO:0030003 | cellular cation homeostasis               | 9 of 4104 in the list  | 22 of 8404 in the genome  | 1 | CCG000302. 1, CCG009992. 1, CCG026796. 1, CCG003104. 1, CCG020400. 2, CCG008826. 1, CCG024590. 1, CCG012569. 1, CCG020377. 1                                                                                                                                                                                                                                                                                                                                                                                                                                                                                                                                                                                                                                                                                                                                                                                                                                                                                                                                                                                                                                                                                                                                                                                                                                                                                 |
| GO:0055082 | cellular chemical homeostasis             | 9 of 4104 in the list  | 22 of 8404 in the genome  | 1 | CCG000302. 1, CCG009992. 1, CCG026796. 1, CCG003104. 1, CCG020400. 2, CCG008826. 1, CCG024590. 1, CCG012569. 1, CCG020377. 1                                                                                                                                                                                                                                                                                                                                                                                                                                                                                                                                                                                                                                                                                                                                                                                                                                                                                                                                                                                                                                                                                                                                                                                                                                                                                 |



|            |                                       |                        |                          |   |                                                                                                                                                                                                                                                                                                                                                                                                                                                                                                                           |
|------------|---------------------------------------|------------------------|--------------------------|---|---------------------------------------------------------------------------------------------------------------------------------------------------------------------------------------------------------------------------------------------------------------------------------------------------------------------------------------------------------------------------------------------------------------------------------------------------------------------------------------------------------------------------|
| GO:0034220 | ion transmembrane transport           | 39 of 4104 in the list | 88 of 8404 in the genome | 1 | CCG006469.1, CCG023640.1, CCG000585.1, CCG009808.1, CCG025348.1, CCG003662.1, CCG025989.2, CCG019619.1, CCG008422.1, CCG024222.1, CCG003878.1, CCG010112.1, CCG005769.1, CCG018073.1, CCG001066.1, CCG019407.1, CCG007724.1, CCG013643.1, CCG006348.1, CCG015410.1, CCG002038.1, CCG025107.1, CCG009142.1, CCG027585.1, CCG000148.1, CCG006486.1, CCG023244.1, CCG005924.2, CCG026667.1, CCG025450.1, CCG005768.1, CCG020840.1, CCG008587.1, CCG000927.1, CCG021934.1, CCG019890.1, CCG021349.1, CCG001285.1, CCG011706.1 |
| GO:0048878 | chemical homeostasis                  | 12 of 4104 in the list | 29 of 8404 in the genome | 1 | CCG000302.1, CCG016162.1, CCG009992.1, CCG016956.1, CCG026796.1, CCG003104.1, CCG020400.2, CCG008826.1, CCG024590.1, CCG012569.1, CCG020377.1, CCG023671.2                                                                                                                                                                                                                                                                                                                                                                |
| GO:0050801 | ion homeostasis                       | 12 of 4104 in the list | 29 of 8404 in the genome | 1 | CCG000302.1, CCG016162.1, CCG009992.1, CCG016956.1, CCG026796.1, CCG003104.1, CCG020400.2, CCG008826.1, CCG024590.1, CCG012569.1, CCG020377.1, CCG023671.2                                                                                                                                                                                                                                                                                                                                                                |
| GO:0055080 | cation homeostasis                    | 12 of 4104 in the list | 29 of 8404 in the genome | 1 | CCG000302.1, CCG016162.1, CCG009992.1, CCG016956.1, CCG026796.1, CCG003104.1, CCG020400.2, CCG008826.1, CCG024590.1, CCG012569.1, CCG020377.1, CCG023671.2                                                                                                                                                                                                                                                                                                                                                                |
| GO:0006071 | glycerol metabolic process            | 3 of 4104 in the list  | 8 of 8404 in the genome  | 1 | CCG008317.1, CCG013318.1, CCG015587.1                                                                                                                                                                                                                                                                                                                                                                                                                                                                                     |
| GO:0006144 | purine nucleobase metabolic process   | 3 of 4104 in the list  | 8 of 8404 in the genome  | 1 | CCG026852.1, CCG004257.1, CCG017331.1                                                                                                                                                                                                                                                                                                                                                                                                                                                                                     |
| GO:0019400 | alditol metabolic process             | 3 of 4104 in the list  | 8 of 8404 in the genome  | 1 | CCG008317.1, CCG013318.1, CCG015587.1                                                                                                                                                                                                                                                                                                                                                                                                                                                                                     |
| GO:0070588 | calcium ion transmembrane transport   | 3 of 4104 in the list  | 8 of 8404 in the genome  | 1 | CCG027585.1, CCG009808.1, CCG011706.1                                                                                                                                                                                                                                                                                                                                                                                                                                                                                     |
| GO:0071804 | cellular potassium ion transport      | 3 of 4104 in the list  | 8 of 8404 in the genome  | 1 | CCG008587.1, CCG006469.1, CCG019890.1                                                                                                                                                                                                                                                                                                                                                                                                                                                                                     |
| GO:0071805 | potassium ion transmembrane transport | 3 of 4104 in the list  | 8 of 8404 in the genome  | 1 | CCG008587.1, CCG006469.1, CCG019890.1                                                                                                                                                                                                                                                                                                                                                                                                                                                                                     |
| GO:0009605 | response to external stimulus         | 8 of 4104 in the list  | 20 of 8404 in the genome | 1 | CCG017696.1, CCG009531.1, CCG012989.1, CCG002366.1, CCG012988.1, CCG007317.1, CCG000834.1, CCG010071.1                                                                                                                                                                                                                                                                                                                                                                                                                    |

|            |                                              |                         |                           |   |                                                                                                                                                                                                                                                                                                                                                                                                                                                                                                                                                                                                                                                                                                                                                                                                                                                                                                                                                                                                                                                                                                                                                                                                                                                                                                                                                                                                                                                                                                                                                                        |
|------------|----------------------------------------------|-------------------------|---------------------------|---|------------------------------------------------------------------------------------------------------------------------------------------------------------------------------------------------------------------------------------------------------------------------------------------------------------------------------------------------------------------------------------------------------------------------------------------------------------------------------------------------------------------------------------------------------------------------------------------------------------------------------------------------------------------------------------------------------------------------------------------------------------------------------------------------------------------------------------------------------------------------------------------------------------------------------------------------------------------------------------------------------------------------------------------------------------------------------------------------------------------------------------------------------------------------------------------------------------------------------------------------------------------------------------------------------------------------------------------------------------------------------------------------------------------------------------------------------------------------------------------------------------------------------------------------------------------------|
| GO:0046907 | intracellular transport                      | 108 of 4104 in the list | 236 of 8404 in the genome | 1 | CCG026698. 1, CCG011766. 1, CCG018832. 1, CCG003146. 1, CCG011408. 1, CCG007060. 1, CCG001809. 1, CCG028124. 1, CCG017209. 1, CCG019590. 1, CCG027692. 1, CCG013042. 1, CCG020949. 1, CCG003995. 1, CCG015386. 1, CCG019020. 1, CCG012550. 1, CCG002645. 1, CCG009428. 1, CCG018800. 1, CCG024905. 1, CCG011813. 1, CCG005262. 1, CCG020315. 1, CCG002028. 1, CCG015568. 1, CCG011006. 1, CCG017077. 1, CCG002766. 1, CCG000010. 1, CCG000614. 1, CCG003531. 1, CCG011567. 1, CCG017078. 1, CCG011696. 1, CCG014307. 1, CCG027457. 1, CCG019629. 2, CCG022927. 1, CCG027257. 1, CCG010939. 1, CCG007855. 1, CCG007283. 1, CCG016541. 1, CCG020909. 1, CCG018447. 1, CCG003786. 1, CCG026989. 1, CCG027733. 1, CCG006714. 1, CCG011862. 1, CCG027473. 1, CCG010178. 1, CCG006777. 1, CCG013984. 1, CCG001673. 1, CCG001172. 1, CCG020280. 1, CCG014506. 1, CCG018557. 1, CCG027564. 1, CCG026620. 1, CCG015800. 2, CCG018217. 1, CCG006625. 1, CCG003775. 1, CCG004573. 1, CCG016831. 1, CCG021221. 1, CCG004869. 1, CCG022771. 1, CCG009136. 1, CCG022910. 1, CCG023595. 1, CCG017373. 1, CCG006924. 1, CCG021220. 1, CCG028498. 1, CCG023814. 2, CCG019797. 1, CCG006775. 1, CCG015087. 1, CCG013126. 2, CCG013641. 1, CCG025233. 1, CCG008312. 1, CCG003495. 1, CCG021377. 1, CCG027241. 1, CCG026336. 1, CCG005195. 1, CCG021800. 1, CCG016542. 1, CCG014226. 1, CCG009362. 1, CCG020806. 1, CCG020634. 1, CCG010567. 3, CCG025473. 1, CCG007989. 1, CCG026947. 1, CCG023756. 1, CCG008116. 1, CCG021152. 1, CCG001481. 1, CCG017125. 1, CCG017141. 1, CCG017874. 1 |
| GO:0007031 | peroxisome organization                      | 5 of 4104 in the list   | 13 of 8404 in the genome  | 1 | CCG018832. 1, CCG019797. 1, CCG006223. 1, CCG019217. 1, CCG010178. 1                                                                                                                                                                                                                                                                                                                                                                                                                                                                                                                                                                                                                                                                                                                                                                                                                                                                                                                                                                                                                                                                                                                                                                                                                                                                                                                                                                                                                                                                                                   |
| GO:0009072 | aromatic amino acid family metabolic process | 5 of 4104 in the list   | 13 of 8404 in the genome  | 1 | CCG011789. 1, CCG011721. 1, CCG006059. 1, CCG011722. 1, CCG014436. 2                                                                                                                                                                                                                                                                                                                                                                                                                                                                                                                                                                                                                                                                                                                                                                                                                                                                                                                                                                                                                                                                                                                                                                                                                                                                                                                                                                                                                                                                                                   |
| GO:0042440 | pigment metabolic process                    | 5 of 4104 in the list   | 13 of 8404 in the genome  | 1 | CCG027212. 1, CCG004257. 1, CCG009424. 1, CCG005053. 1, CCG017331. 1                                                                                                                                                                                                                                                                                                                                                                                                                                                                                                                                                                                                                                                                                                                                                                                                                                                                                                                                                                                                                                                                                                                                                                                                                                                                                                                                                                                                                                                                                                   |

|            |                               |                         |                            |   |                                                                                                                                                                                                                                                                                                                                                                                                                                                                                                                                                                                                                                                                                                                                                                                                                                                                                                                                                                                                                                                                                                                                                                                                                                                                                                                                                                                                                                                                                                                                                                                                                                                                                                                                                                                                                                                                                                                                                                   |
|------------|-------------------------------|-------------------------|----------------------------|---|-------------------------------------------------------------------------------------------------------------------------------------------------------------------------------------------------------------------------------------------------------------------------------------------------------------------------------------------------------------------------------------------------------------------------------------------------------------------------------------------------------------------------------------------------------------------------------------------------------------------------------------------------------------------------------------------------------------------------------------------------------------------------------------------------------------------------------------------------------------------------------------------------------------------------------------------------------------------------------------------------------------------------------------------------------------------------------------------------------------------------------------------------------------------------------------------------------------------------------------------------------------------------------------------------------------------------------------------------------------------------------------------------------------------------------------------------------------------------------------------------------------------------------------------------------------------------------------------------------------------------------------------------------------------------------------------------------------------------------------------------------------------------------------------------------------------------------------------------------------------------------------------------------------------------------------------------------------------|
| GO:0051234 | establishment of localization | 642 of 4104 in the list | 1349 of 8404 in the genome | 1 | CCG005307. 1, CCG017420. 1, CCG020245. 1, CCG024345. 1, CCG014880. 1, CCG010623. 2, CCG003545. 1, CCG017209. 1, CCG021740. 1, CCG004086. 1, CCG021738. 1, CCG000585. 1, CCG003991. 1, CCG001468. 1, CCG013009. 1, CCG019285. 1, CCG009428. 1, CCG019768. 1, CCG022794. 1, CCG024905. 1, CCG005974. 1, CCG013708. 1, CCG023583. 1, CCG003712. 1, CCG017078. 1, CCG026799. 1, CCG011696. 1, CCG009530. 1, CCG017240. 1, CCG027457. 1, CCG027368. 1, CCG001220. 1, CCG019190. 1, CCG018661. 1, CCG016654. 1, CCG018416. 1, CCG014240. 1, CCG006714. 1, CCG027473. 1, CCG026050. 1, CCG001964. 1, CCG019655. 1, CCG009668. 1, CCG025596. 1, CCG016493. 2, CCG009822. 1, CCG005191. 1, CCG004573. 1, CCG011778. 1, CCG006588. 2, CCG000106. 1, CCG014793. 1, CCG024222. 1, CCG026953. 1, CCG006489. 1, CCG019678. 1, CCG017591. 1, CCG018264. 1, CCG013641. 1, CCG003563. 1, CCG017477. 1, CCG008236. 1, CCG003495. 1, CCG005391. 2, CCG022168. 1, CCG007597. 1, CCG016756. 1, CCG019647. 1, CCG009778. 1, CCG015530. 1, CCG026151. 1, CCG022587. 1, CCG020634. 1, CCG010567. 3, CCG009959. 1, CCG027182. 1, CCG026422. 2, CCG026947. 1, CCG016719. 1, CCG000983. 1, CCG010416. 1, CCG009126. 1, CCG002937. 1, CCG001285. 1, CCG016753. 1, CCG011252. 1, CCG027692. 1, CCG008403. 1, CCG016347. 1, CCG022802. 1, CCG010112. 1, CCG020491. 1, CCG014448. 1, CCG005239. 1, CCG005919. 1, CCG016266. 1, CCG022137. 1, CCG012195. 1, CCG026819. 1, CCG025467. 2, CCG011827. 1, CCG028471. 2, CCG002135. 1, CCG019611. 1, CCG010711. 1, CCG000148. 1, CCG025510. 1, CCG023190. 1, CCG022927. 1, CCG022219. 1, CCG012214. 1, CCG027257. 1, CCG017641. 1, CCG016459. 1, CCG016836. 2, CCG019890. 1, CCG023983. 1, CCG020458. 1, CCG004308. 1, CCG013984. 1, CCG026547. 1, CCG000631. 1, CCG003566. 1, CCG006770. 1, CCG015800. 2, CCG002839. 1, CCG022510. 1, CCG003775. 1, CCG016831. 1, CCG021221. 1, CCG023595. 1, CCG018753. 1, CCG018073. 1, CCG016956. 1, CCG026052. 1, |
|------------|-------------------------------|-------------------------|----------------------------|---|-------------------------------------------------------------------------------------------------------------------------------------------------------------------------------------------------------------------------------------------------------------------------------------------------------------------------------------------------------------------------------------------------------------------------------------------------------------------------------------------------------------------------------------------------------------------------------------------------------------------------------------------------------------------------------------------------------------------------------------------------------------------------------------------------------------------------------------------------------------------------------------------------------------------------------------------------------------------------------------------------------------------------------------------------------------------------------------------------------------------------------------------------------------------------------------------------------------------------------------------------------------------------------------------------------------------------------------------------------------------------------------------------------------------------------------------------------------------------------------------------------------------------------------------------------------------------------------------------------------------------------------------------------------------------------------------------------------------------------------------------------------------------------------------------------------------------------------------------------------------------------------------------------------------------------------------------------------------|

|            |           |                         |                            |   |                                                                                                                                                                                                                                                                                                                                                                                                                                                                                                                                                                                                                                                                                                                                                                                                                                                                                                                                                                                                                                                                                                                                                                                                                                                                                                                                                                                                                                                                                                                                                                                                                                                                                                                                                                                                                                                                                                                                                                   |
|------------|-----------|-------------------------|----------------------------|---|-------------------------------------------------------------------------------------------------------------------------------------------------------------------------------------------------------------------------------------------------------------------------------------------------------------------------------------------------------------------------------------------------------------------------------------------------------------------------------------------------------------------------------------------------------------------------------------------------------------------------------------------------------------------------------------------------------------------------------------------------------------------------------------------------------------------------------------------------------------------------------------------------------------------------------------------------------------------------------------------------------------------------------------------------------------------------------------------------------------------------------------------------------------------------------------------------------------------------------------------------------------------------------------------------------------------------------------------------------------------------------------------------------------------------------------------------------------------------------------------------------------------------------------------------------------------------------------------------------------------------------------------------------------------------------------------------------------------------------------------------------------------------------------------------------------------------------------------------------------------------------------------------------------------------------------------------------------------|
| GO:0006810 | transport | 640 of 4104 in the list | 1345 of 8404 in the genome | 1 | CCG005307. 1, CCG017420. 1, CCG020245. 1, CCG024345. 1, CCG014880. 1, CCG010623. 2, CCG003545. 1, CCG017209. 1, CCG021740. 1, CCG004086. 1, CCG021738. 1, CCG000585. 1, CCG003991. 1, CCG001468. 1, CCG013009. 1, CCG019285. 1, CCG009428. 1, CCG019768. 1, CCG022794. 1, CCG024905. 1, CCG005974. 1, CCG013708. 1, CCG023583. 1, CCG003712. 1, CCG017078. 1, CCG026799. 1, CCG011696. 1, CCG009530. 1, CCG017240. 1, CCG027457. 1, CCG027368. 1, CCG001220. 1, CCG019190. 1, CCG018661. 1, CCG016654. 1, CCG018416. 1, CCG014240. 1, CCG006714. 1, CCG027473. 1, CCG026050. 1, CCG001964. 1, CCG019655. 1, CCG009668. 1, CCG025596. 1, CCG016493. 2, CCG009822. 1, CCG005191. 1, CCG004573. 1, CCG011778. 1, CCG006588. 2, CCG000106. 1, CCG014793. 1, CCG024222. 1, CCG026953. 1, CCG006489. 1, CCG019678. 1, CCG017591. 1, CCG018264. 1, CCG013641. 1, CCG003563. 1, CCG017477. 1, CCG008236. 1, CCG003495. 1, CCG005391. 2, CCG022168. 1, CCG007597. 1, CCG016756. 1, CCG019647. 1, CCG009778. 1, CCG015530. 1, CCG026151. 1, CCG022587. 1, CCG020634. 1, CCG010567. 3, CCG009959. 1, CCG027182. 1, CCG026422. 2, CCG026947. 1, CCG016719. 1, CCG000983. 1, CCG010416. 1, CCG009126. 1, CCG002937. 1, CCG001285. 1, CCG016753. 1, CCG011252. 1, CCG027692. 1, CCG008403. 1, CCG016347. 1, CCG022802. 1, CCG010112. 1, CCG020491. 1, CCG014448. 1, CCG005239. 1, CCG005919. 1, CCG016266. 1, CCG022137. 1, CCG012195. 1, CCG026819. 1, CCG025467. 2, CCG011827. 1, CCG028471. 2, CCG002135. 1, CCG019611. 1, CCG010711. 1, CCG000148. 1, CCG025510. 1, CCG023190. 1, CCG022927. 1, CCG022219. 1, CCG012214. 1, CCG027257. 1, CCG017641. 1, CCG016459. 1, CCG016836. 2, CCG019890. 1, CCG023983. 1, CCG020458. 1, CCG004308. 1, CCG013984. 1, CCG026547. 1, CCG000631. 1, CCG003566. 1, CCG006770. 1, CCG015800. 2, CCG002839. 1, CCG022510. 1, CCG003775. 1, CCG016831. 1, CCG021221. 1, CCG023595. 1, CCG018753. 1, CCG018073. 1, CCG016956. 1, CCG026052. 1, |
|------------|-----------|-------------------------|----------------------------|---|-------------------------------------------------------------------------------------------------------------------------------------------------------------------------------------------------------------------------------------------------------------------------------------------------------------------------------------------------------------------------------------------------------------------------------------------------------------------------------------------------------------------------------------------------------------------------------------------------------------------------------------------------------------------------------------------------------------------------------------------------------------------------------------------------------------------------------------------------------------------------------------------------------------------------------------------------------------------------------------------------------------------------------------------------------------------------------------------------------------------------------------------------------------------------------------------------------------------------------------------------------------------------------------------------------------------------------------------------------------------------------------------------------------------------------------------------------------------------------------------------------------------------------------------------------------------------------------------------------------------------------------------------------------------------------------------------------------------------------------------------------------------------------------------------------------------------------------------------------------------------------------------------------------------------------------------------------------------|

|            |                                       |                         |                           |   |                                                                                                                                                                                                                                                                                                                                                                                                                                                                                                                                                                                                                                                                                                                                                                                                                                                                                                                                                                                                                                                                                                                                                                                                                                                                                                                                                                                                                                                                                                                                                                                                                                                                                                                    |
|------------|---------------------------------------|-------------------------|---------------------------|---|--------------------------------------------------------------------------------------------------------------------------------------------------------------------------------------------------------------------------------------------------------------------------------------------------------------------------------------------------------------------------------------------------------------------------------------------------------------------------------------------------------------------------------------------------------------------------------------------------------------------------------------------------------------------------------------------------------------------------------------------------------------------------------------------------------------------------------------------------------------------------------------------------------------------------------------------------------------------------------------------------------------------------------------------------------------------------------------------------------------------------------------------------------------------------------------------------------------------------------------------------------------------------------------------------------------------------------------------------------------------------------------------------------------------------------------------------------------------------------------------------------------------------------------------------------------------------------------------------------------------------------------------------------------------------------------------------------------------|
| GO:0051649 | establishment of localization in cell | 118 of 4104 in the list | 258 of 8404 in the genome | 1 | CCG026698. 1, CCG011766. 1, CCG018832. 1, CCG003146. 1, CCG011408. 1, CCG007060. 1, CCG001809. 1, CCG028124. 1, CCG017209. 1, CCG019590. 1, CCG027692. 1, CCG013042. 1, CCG020949. 1, CCG003995. 1, CCG015386. 1, CCG019020. 1, CCG012550. 1, CCG002645. 1, CCG009428. 1, CCG018800. 1, CCG024905. 1, CCG011813. 1, CCG005262. 1, CCG020315. 1, CCG002028. 1, CCG015568. 1, CCG011006. 1, CCG017077. 1, CCG002766. 1, CCG000010. 1, CCG023051. 1, CCG016860. 1, CCG000614. 1, CCG003531. 1, CCG011567. 1, CCG017078. 1, CCG011696. 1, CCG014307. 1, CCG027457. 1, CCG019629. 2, CCG005810. 1, CCG022927. 1, CCG027257. 1, CCG010939. 1, CCG007855. 1, CCG007283. 1, CCG002374. 1, CCG016541. 1, CCG020909. 1, CCG008323. 1, CCG018447. 1, CCG003786. 1, CCG026989. 1, CCG027733. 1, CCG006714. 1, CCG011862. 1, CCG016836. 2, CCG027473. 1, CCG010178. 1, CCG006777. 1, CCG013984. 1, CCG001673. 1, CCG001172. 1, CCG000631. 1, CCG020280. 1, CCG014506. 1, CCG018557. 1, CCG016493. 2, CCG026620. 1, CCG027564. 1, CCG015800. 2, CCG018217. 1, CCG006625. 1, CCG003775. 1, CCG004573. 1, CCG016831. 1, CCG021221. 1, CCG004869. 1, CCG022771. 1, CCG009136. 1, CCG022910. 1, CCG023595. 1, CCG017373. 1, CCG006924. 1, CCG021220. 1, CCG028498. 1, CCG023814. 2, CCG019797. 1, CCG006775. 1, CCG015087. 1, CCG013126. 2, CCG013641. 1, CCG025233. 1, CCG008312. 1, CCG003495. 1, CCG021377. 1, CCG027241. 1, CCG026336. 1, CCG002121. 1, CCG005195. 1, CCG021800. 1, CCG016542. 1, CCG014226. 1, CCG009362. 1, CCG020806. 1, CCG020634. 1, CCG010567. 3, CCG025473. 1, CCG007989. 1, CCG026947. 1, CCG023756. 1, CCG008116. 1, CCG021152. 1, CCG001481. 1, CCG017125. 1, CCG017141. 1, CCG002937. 1, CCG017874. 1 |
|------------|---------------------------------------|-------------------------|---------------------------|---|--------------------------------------------------------------------------------------------------------------------------------------------------------------------------------------------------------------------------------------------------------------------------------------------------------------------------------------------------------------------------------------------------------------------------------------------------------------------------------------------------------------------------------------------------------------------------------------------------------------------------------------------------------------------------------------------------------------------------------------------------------------------------------------------------------------------------------------------------------------------------------------------------------------------------------------------------------------------------------------------------------------------------------------------------------------------------------------------------------------------------------------------------------------------------------------------------------------------------------------------------------------------------------------------------------------------------------------------------------------------------------------------------------------------------------------------------------------------------------------------------------------------------------------------------------------------------------------------------------------------------------------------------------------------------------------------------------------------|

|            |                                        |                         |                            |   |                                                                                                                                                                                                                                                                                                                                                                                                                                                                                                                                                                                                                                                                                                                                                                                                                                                                                                                                                                                                                                                                                                                                                                                                                                                                                                                                                                                                                                                                                                                                                                                                                                                                                                                                                                                                                                                                                                                                                                   |
|------------|----------------------------------------|-------------------------|----------------------------|---|-------------------------------------------------------------------------------------------------------------------------------------------------------------------------------------------------------------------------------------------------------------------------------------------------------------------------------------------------------------------------------------------------------------------------------------------------------------------------------------------------------------------------------------------------------------------------------------------------------------------------------------------------------------------------------------------------------------------------------------------------------------------------------------------------------------------------------------------------------------------------------------------------------------------------------------------------------------------------------------------------------------------------------------------------------------------------------------------------------------------------------------------------------------------------------------------------------------------------------------------------------------------------------------------------------------------------------------------------------------------------------------------------------------------------------------------------------------------------------------------------------------------------------------------------------------------------------------------------------------------------------------------------------------------------------------------------------------------------------------------------------------------------------------------------------------------------------------------------------------------------------------------------------------------------------------------------------------------|
| GO:1901576 | organic substance biosynthetic process | 528 of 4104 in the list | 1115 of 8404 in the genome | 1 | CCG014531. 2, CCG014396. 1, CCG006549. 1, CCG013430. 1, CCG009878. 1, CCG024517. 1, CCG026174. 1, CCG004468. 1, CCG016238. 1, CCG001292. 1, CCG016220. 1, CCG018321. 1, CCG002470. 1, CCG025472. 1, CCG018432. 1, CCG025208. 1, CCG026871. 2, CCG012623. 1, CCG022025. 2, CCG005053. 1, CCG008270. 1, CCG021110. 1, CCG024612. 1, CCG005737. 1, CCG024326. 1, CCG020286. 1, CCG021086. 2, CCG014280. 1, CCG008871. 1, CCG015694. 1, CCG013865. 1, CCG018788. 1, CCG006484. 1, CCG026602. 1, CCG006344. 1, CCG021737. 1, CCG023468. 1, CCG006821. 1, CCG015350. 1, CCG003683. 2, CCG021948. 1, CCG011148. 1, CCG020651. 1, CCG012840. 1, CCG000552. 1, CCG023452. 1, CCG009805. 2, CCG002966. 1, CCG019545. 1, CCG003142. 1, CCG021137. 1, CCG013610. 1, CCG001876. 1, CCG009518. 1, CCG024200. 1, CCG002231. 1, CCG023125. 1, CCG016381. 1, CCG011727. 1, CCG026865. 1, CCG027748. 1, CCG017001. 1, CCG000294. 1, CCG004926. 1, CCG004532. 1, CCG017381. 1, CCG015367. 1, CCG026047. 1, CCG011491. 1, CCG009333. 1, CCG005501. 1, CCG007766. 1, CCG009803. 1, CCG018164. 1, CCG004224. 1, CCG010112. 1, CCG028092. 1, CCG000209. 1, CCG021521. 1, CCG007902. 1, CCG024232. 1, CCG024155. 1, CCG023184. 1, CCG019263. 1, CCG010561. 1, CCG015986. 1, CCG018168. 1, CCG000148. 1, CCG019426. 1, CCG025889. 1, CCG018796. 1, CCG009394. 1, CCG024760. 1, CCG026099. 1, CCG025897. 1, CCG006009. 1, CCG010319. 1, CCG017995. 1, CCG008044. 1, CCG010797. 1, CCG010138. 1, CCG026370. 1, CCG009928. 1, CCG005442. 1, CCG008130. 1, CCG003249. 1, CCG017894. 1, CCG007417. 1, CCG021716. 1, CCG007724. 1, CCG002662. 1, CCG017295. 1, CCG023939. 1, CCG008932. 1, CCG017241. 1, CCG021933. 1, CCG026331. 1, CCG027131. 1, CCG015312. 2, CCG015747. 1, CCG000490. 1, CCG027197. 1, CCG025157. 1, CCG005269. 1, CCG018659. 2, CCG024529. 1, CCG016955. 1, CCG015521. 1, CCG009141. 1, CCG025840. 1, CCG003871. 1, CCG000158. 1, CCG010174. 2, CCG006211. 1, CCG007710. 1, |
|------------|----------------------------------------|-------------------------|----------------------------|---|-------------------------------------------------------------------------------------------------------------------------------------------------------------------------------------------------------------------------------------------------------------------------------------------------------------------------------------------------------------------------------------------------------------------------------------------------------------------------------------------------------------------------------------------------------------------------------------------------------------------------------------------------------------------------------------------------------------------------------------------------------------------------------------------------------------------------------------------------------------------------------------------------------------------------------------------------------------------------------------------------------------------------------------------------------------------------------------------------------------------------------------------------------------------------------------------------------------------------------------------------------------------------------------------------------------------------------------------------------------------------------------------------------------------------------------------------------------------------------------------------------------------------------------------------------------------------------------------------------------------------------------------------------------------------------------------------------------------------------------------------------------------------------------------------------------------------------------------------------------------------------------------------------------------------------------------------------------------|

|            |                               |                         |                            |   |                                                                                                                                                                                                                                                                                                                                                                                                                                                                                                                                                                                                                                                                                                                                                                                                                                                                                                                                                                                                                                                                                                                                                                                                                                                                                                                                                                                                                                                                                                                                                                                                                                                                                                                                                                                                                                                                                                                                                                   |
|------------|-------------------------------|-------------------------|----------------------------|---|-------------------------------------------------------------------------------------------------------------------------------------------------------------------------------------------------------------------------------------------------------------------------------------------------------------------------------------------------------------------------------------------------------------------------------------------------------------------------------------------------------------------------------------------------------------------------------------------------------------------------------------------------------------------------------------------------------------------------------------------------------------------------------------------------------------------------------------------------------------------------------------------------------------------------------------------------------------------------------------------------------------------------------------------------------------------------------------------------------------------------------------------------------------------------------------------------------------------------------------------------------------------------------------------------------------------------------------------------------------------------------------------------------------------------------------------------------------------------------------------------------------------------------------------------------------------------------------------------------------------------------------------------------------------------------------------------------------------------------------------------------------------------------------------------------------------------------------------------------------------------------------------------------------------------------------------------------------------|
| GO:0044249 | cellular biosynthetic process | 512 of 4104 in the list | 1082 of 8404 in the genome | 1 | CCG014531. 2, CCG018536. 1, CCG023277. 1, CCG014396. 1, CCG006549. 1, CCG004807. 1, CCG010191. 3, CCG017331. 1, CCG013430. 1, CCG009878. 1, CCG010647. 1, CCG026882. 1, CCG018507. 1, CCG026174. 1, CCG002354. 1, CCG004468. 1, CCG016238. 1, CCG026473. 1, CCG004091. 1, CCG001292. 1, CCG017097. 1, CCG016220. 1, CCG018321. 1, CCG026825. 1, CCG002470. 1, CCG003573. 1, CCG028505. 1, CCG025472. 1, CCG025223. 1, CCG018432. 1, CCG015599. 1, CCG004398. 1, CCG026536. 1, CCG025208. 1, CCG012213. 2, CCG007993. 1, CCG026871. 2, CCG016653. 1, CCG018719. 1, CCG013353. 1, CCG012623. 1, CCG022025. 2, CCG005053. 1, CCG025940. 1, CCG013914. 1, CCG008270. 1, CCG019210. 1, CCG027115. 1, CCG021110. 1, CCG018799. 1, CCG020129. 1, CCG024612. 1, CCG005737. 1, CCG019909. 1, CCG005276. 1, CCG024326. 1, CCG020877. 1, CCG021295. 1, CCG009249. 1, CCG006231. 1, CCG020286. 1, CCG014896. 1, CCG001863. 1, CCG013131. 1, CCG021086. 2, CCG014280. 1, CCG006767. 1, CCG019296. 1, CCG013065. 1, CCG008871. 1, CCG014840. 1, CCG015694. 1, CCG014819. 1, CCG013865. 1, CCG018788. 1, CCG006484. 1, CCG010378. 2, CCG027114. 1, CCG028131. 1, CCG026602. 1, CCG006344. 1, CCG026280. 1, CCG024432. 2, CCG010510. 1, CCG027312. 1, CCG021737. 1, CCG023468. 1, CCG000773. 1, CCG006821. 1, CCG009119. 1, CCG015350. 1, CCG003683. 2, CCG021948. 1, CCG011148. 1, CCG020651. 1, CCG000552. 1, CCG023452. 1, CCG009805. 2, CCG025636. 2, CCG014116. 1, CCG002966. 1, CCG017111. 1, CCG019545. 1, CCG003142. 1, CCG021137. 1, CCG013610. 1, CCG019330. 1, CCG022773. 2, CCG003173. 1, CCG001876. 1, CCG000915. 1, CCG009518. 1, CCG015411. 1, CCG024200. 1, CCG002231. 1, CCG023125. 1, CCG016381. 1, CCG011727. 1, CCG028426. 1, CCG026865. 1, CCG027748. 1, CCG017001. 1, CCG000294. 1, CCG004926. 1, CCG004532. 1, CCG022191. 1, CCG016778. 1, CCG017381. 1, CCG015367. 1, CCG026047. 1, CCG007336. 1, CCG007155. 1, CCG017175. 1, CCG007610. 1, CCG011491. 1, |
| GO:0046148 | pigment biosynthetic process  | 4 of 4104 in the list   | 11 of 8404 in the genome   | 1 | CCG027212. 1, CCG004257. 1, CCG005053. 1, CCG017331. 1                                                                                                                                                                                                                                                                                                                                                                                                                                                                                                                                                                                                                                                                                                                                                                                                                                                                                                                                                                                                                                                                                                                                                                                                                                                                                                                                                                                                                                                                                                                                                                                                                                                                                                                                                                                                                                                                                                            |

|            |              |                         |                            |   |                                                                                                                                                                                                                                                                                                                                                                                                                                                                                                                                                                                                                                                                                                                                                                                                                                                                                                                                                                                                                                                                                                                                                                                                                                                                                                                                                                                                                                                                                                                                                                                                                                                                                                                                                                                                                                                                                                                                                                   |
|------------|--------------|-------------------------|----------------------------|---|-------------------------------------------------------------------------------------------------------------------------------------------------------------------------------------------------------------------------------------------------------------------------------------------------------------------------------------------------------------------------------------------------------------------------------------------------------------------------------------------------------------------------------------------------------------------------------------------------------------------------------------------------------------------------------------------------------------------------------------------------------------------------------------------------------------------------------------------------------------------------------------------------------------------------------------------------------------------------------------------------------------------------------------------------------------------------------------------------------------------------------------------------------------------------------------------------------------------------------------------------------------------------------------------------------------------------------------------------------------------------------------------------------------------------------------------------------------------------------------------------------------------------------------------------------------------------------------------------------------------------------------------------------------------------------------------------------------------------------------------------------------------------------------------------------------------------------------------------------------------------------------------------------------------------------------------------------------------|
| GO:0051179 | localization | 645 of 4104 in the list | 1360 of 8404 in the genome | 1 | CCG005307. 1, CCG017420. 1, CCG020245. 1, CCG024345. 1, CCG014880. 1, CCG010623. 2, CCG003545. 1, CCG017209. 1, CCG021740. 1, CCG004086. 1, CCG021738. 1, CCG000585. 1, CCG003991. 1, CCG001468. 1, CCG013009. 1, CCG019285. 1, CCG009428. 1, CCG019768. 1, CCG022794. 1, CCG024905. 1, CCG005974. 1, CCG003587. 1, CCG013708. 1, CCG023583. 1, CCG003712. 1, CCG017078. 1, CCG026799. 1, CCG011696. 1, CCG009530. 1, CCG017240. 1, CCG027457. 1, CCG027368. 1, CCG001220. 1, CCG019190. 1, CCG018661. 1, CCG016654. 1, CCG018416. 1, CCG014240. 1, CCG006714. 1, CCG027473. 1, CCG026050. 1, CCG001964. 1, CCG019655. 1, CCG009668. 1, CCG025596. 1, CCG016493. 2, CCG009822. 1, CCG005191. 1, CCG004573. 1, CCG011778. 1, CCG006588. 2, CCG000106. 1, CCG014793. 1, CCG024222. 1, CCG026953. 1, CCG006489. 1, CCG019678. 1, CCG017591. 1, CCG018264. 1, CCG013641. 1, CCG003563. 1, CCG017477. 1, CCG008236. 1, CCG003495. 1, CCG005391. 2, CCG022168. 1, CCG007597. 1, CCG016756. 1, CCG019647. 1, CCG009778. 1, CCG015530. 1, CCG026151. 1, CCG022587. 1, CCG020634. 1, CCG010567. 3, CCG009959. 1, CCG027182. 1, CCG026422. 2, CCG026947. 1, CCG016719. 1, CCG000983. 1, CCG010416. 1, CCG009126. 1, CCG002937. 1, CCG001285. 1, CCG016753. 1, CCG011252. 1, CCG027692. 1, CCG008403. 1, CCG016347. 1, CCG022802. 1, CCG010112. 1, CCG020491. 1, CCG014448. 1, CCG005239. 1, CCG005919. 1, CCG016266. 1, CCG022137. 1, CCG012195. 1, CCG026819. 1, CCG025467. 2, CCG011827. 1, CCG028471. 2, CCG002135. 1, CCG019611. 1, CCG010711. 1, CCG000148. 1, CCG025510. 1, CCG023190. 1, CCG022927. 1, CCG022219. 1, CCG012214. 1, CCG027257. 1, CCG017641. 1, CCG016459. 1, CCG016836. 2, CCG019890. 1, CCG023983. 1, CCG020458. 1, CCG004308. 1, CCG013984. 1, CCG026547. 1, CCG000631. 1, CCG003566. 1, CCG006770. 1, CCG015800. 2, CCG002839. 1, CCG022510. 1, CCG003775. 1, CCG016831. 1, CCG021221. 1, CCG023595. 1, CCG018753. 1, CCG018073. 1, CCG016956. 1, |
|------------|--------------|-------------------------|----------------------------|---|-------------------------------------------------------------------------------------------------------------------------------------------------------------------------------------------------------------------------------------------------------------------------------------------------------------------------------------------------------------------------------------------------------------------------------------------------------------------------------------------------------------------------------------------------------------------------------------------------------------------------------------------------------------------------------------------------------------------------------------------------------------------------------------------------------------------------------------------------------------------------------------------------------------------------------------------------------------------------------------------------------------------------------------------------------------------------------------------------------------------------------------------------------------------------------------------------------------------------------------------------------------------------------------------------------------------------------------------------------------------------------------------------------------------------------------------------------------------------------------------------------------------------------------------------------------------------------------------------------------------------------------------------------------------------------------------------------------------------------------------------------------------------------------------------------------------------------------------------------------------------------------------------------------------------------------------------------------------|



|            |                       |                         |                           |   |                                                                                                                                                                                                                                                                                                                                                                                                                                                                                                                                                                                                                                                                                                                                                                                                                                                                                                                                                                                                                                                                                                                                                                                                                                                                                                                                                                                                                                                                                                                                                                                                                                                                                                                                                                                   |
|------------|-----------------------|-------------------------|---------------------------|---|-----------------------------------------------------------------------------------------------------------------------------------------------------------------------------------------------------------------------------------------------------------------------------------------------------------------------------------------------------------------------------------------------------------------------------------------------------------------------------------------------------------------------------------------------------------------------------------------------------------------------------------------------------------------------------------------------------------------------------------------------------------------------------------------------------------------------------------------------------------------------------------------------------------------------------------------------------------------------------------------------------------------------------------------------------------------------------------------------------------------------------------------------------------------------------------------------------------------------------------------------------------------------------------------------------------------------------------------------------------------------------------------------------------------------------------------------------------------------------------------------------------------------------------------------------------------------------------------------------------------------------------------------------------------------------------------------------------------------------------------------------------------------------------|
| GO:0051641 | cellular localization | 122 of 4104 in the list | 268 of 8404 in the genome | 1 | <p>CCG026698. 1, CCG011766. 1, CCG018832. 1, CCG003146. 1, CCG011408. 1, CCG007060. 1, CCG001809. 1, CCG028124. 1, CCG017209. 1, CCG019590. 1, CCG027692. 1, CCG013042. 1, CCG020949. 1, CCG003995. 1, CCG015386. 1, CCG019020. 1, CCG012550. 1, CCG002645. 1, CCG009428. 1, CCG018800. 1, CCG007941. 1, CCG024905. 1, CCG011813. 1, CCG003587. 1, CCG005262. 1, CCG020315. 1, CCG002028. 1, CCG015568. 1, CCG011006. 1, CCG017077. 1, CCG002766. 1, CCG000010. 1, CCG023051. 1, CCG016860. 1, CCG000614. 1, CCG003531. 1, CCG011567. 1, CCG017078. 1, CCG011696. 1, CCG014307. 1, CCG027457. 1, CCG014318. 1, CCG019629. 2, CCG005810. 1, CCG022927. 1, CCG027257. 1, CCG010939. 1, CCG007855. 1, CCG007283. 1, CCG002374. 1, CCG016541. 1, CCG020909. 1, CCG008323. 1, CCG018447. 1, CCG003786. 1, CCG026989. 1, CCG027733. 1, CCG006714. 1, CCG011862. 1, CCG016836. 2, CCG027473. 1, CCG010178. 1, CCG006777. 1, CCG013984. 1, CCG001673. 1, CCG001172. 1, CCG000631. 1, CCG020280. 1, CCG014506. 1, CCG018557. 1, CCG016493. 2, CCG026620. 1, CCG027564. 1, CCG015800. 2, CCG018217. 1, CCG006625. 1, CCG003775. 1, CCG004573. 1, CCG016831. 1, CCG021221. 1, CCG004869. 1, CCG022771. 1, CCG009136. 1, CCG022910. 1, CCG023595. 1, CCG017373. 1, CCG006924. 1, CCG021220. 1, CCG028498. 1, CCG023814. 2, CCG019797. 1, CCG006775. 1, CCG015087. 1, CCG013126. 2, CCG027323. 1, CCG013641. 1, CCG025233. 1, CCG008312. 1, CCG003495. 1, CCG021377. 1, CCG027241. 1, CCG026336. 1, CCG002121. 1, CCG005195. 1, CCG021800. 1, CCG016542. 1, CCG014226. 1, CCG009362. 1, CCG020806. 1, CCG020634. 1, CCG010567. 3, CCG025473. 1, CCG007989. 1, CCG026947. 1, CCG023756. 1, CCG008116. 1, CCG021152. 1, CCG001481. 1, CCG017125. 1, CCG017141. 1, CCG002937. 1, CCG017874. 1</p> |
|------------|-----------------------|-------------------------|---------------------------|---|-----------------------------------------------------------------------------------------------------------------------------------------------------------------------------------------------------------------------------------------------------------------------------------------------------------------------------------------------------------------------------------------------------------------------------------------------------------------------------------------------------------------------------------------------------------------------------------------------------------------------------------------------------------------------------------------------------------------------------------------------------------------------------------------------------------------------------------------------------------------------------------------------------------------------------------------------------------------------------------------------------------------------------------------------------------------------------------------------------------------------------------------------------------------------------------------------------------------------------------------------------------------------------------------------------------------------------------------------------------------------------------------------------------------------------------------------------------------------------------------------------------------------------------------------------------------------------------------------------------------------------------------------------------------------------------------------------------------------------------------------------------------------------------|

|            |                                         |                         |                           |   |                                                                                                                                                                                                                                                                                                                                                                                                                                                                                                                                                                                                                                                                                                                                                                                                                                                                                                                                                                                                                                                                                                                                                                                                                                                                                                                                                                                                                                                                                                                                                                                                                                                                                                                                                                                                                                                                                                                                                                   |
|------------|-----------------------------------------|-------------------------|---------------------------|---|-------------------------------------------------------------------------------------------------------------------------------------------------------------------------------------------------------------------------------------------------------------------------------------------------------------------------------------------------------------------------------------------------------------------------------------------------------------------------------------------------------------------------------------------------------------------------------------------------------------------------------------------------------------------------------------------------------------------------------------------------------------------------------------------------------------------------------------------------------------------------------------------------------------------------------------------------------------------------------------------------------------------------------------------------------------------------------------------------------------------------------------------------------------------------------------------------------------------------------------------------------------------------------------------------------------------------------------------------------------------------------------------------------------------------------------------------------------------------------------------------------------------------------------------------------------------------------------------------------------------------------------------------------------------------------------------------------------------------------------------------------------------------------------------------------------------------------------------------------------------------------------------------------------------------------------------------------------------|
| GO:0007165 | signal transduction                     | 307 of 4104 in the list | 657 of 8404 in the genome | 1 | CCG005254. 1, CCG010628. 1, CCG017420. 1, CCG028253. 1, CCG014340. 1, CCG012989. 1, CCG008603. 1, CCG008741. 1, CCG000646. 1, CCG019020. 1, CCG013398. 1, CCG026174. 1, CCG020785. 1, CCG011006. 1, CCG002841. 1, CCG010275. 1, CCG026360. 1, CCG011717. 1, CCG017266. 1, CCG012573. 1, CCG016689. 2, CCG016745. 1, CCG020709. 1, CCG014466. 1, CCG007993. 1, CCG015101. 1, CCG000659. 1, CCG027127. 1, CCG007335. 1, CCG018533. 1, CCG000647. 1, CCG000526. 1, CCG022281. 1, CCG027669. 1, CCG015967. 1, CCG026537. 1, CCG021661. 1, CCG010071. 1, CCG013308. 1, CCG023579. 1, CCG009510. 1, CCG019717. 1, CCG025176. 1, CCG000078. 1, CCG008685. 1, CCG026109. 1, CCG024952. 1, CCG009980. 1, CCG014506. 1, CCG016252. 1, CCG004279. 1, CCG024663. 1, CCG003745. 1, CCG018494. 1, CCG008759. 1, CCG026953. 1, CCG009427. 1, CCG019493. 1, CCG002520. 1, CCG017591. 1, CCG023464. 1, CCG021284. 1, CCG001579. 1, CCG028136. 1, CCG013641. 1, CCG000732. 1, CCG003317. 1, CCG003495. 1, CCG017127. 1, CCG007951. 1, CCG006412. 1, CCG025131. 2, CCG016307. 1, CCG008444. 1, CCG017701. 1, CCG028486. 1, CCG018859. 3, CCG026695. 1, CCG014712. 1, CCG000876. 1, CCG014928. 1, CCG024664. 1, CCG015638. 1, CCG000789. 1, CCG024271. 1, CCG024662. 1, CCG026047. 1, CCG020978. 1, CCG008939. 1, CCG005531. 1, CCG017725. 1, CCG000111. 2, CCG014345. 2, CCG001759. 1, CCG028477. 1, CCG025899. 1, CCG019881. 1, CCG025035. 1, CCG000984. 1, CCG024639. 1, CCG020654. 1, CCG015426. 1, CCG023151. 1, CCG014509. 1, CCG009553. 1, CCG021902. 1, CCG017033. 1, CCG024918. 1, CCG023002. 1, CCG023662. 1, CCG007958. 1, CCG015583. 1, CCG012959. 1, CCG006013. 1, CCG017112. 1, CCG002413. 1, CCG013272. 2, CCG024595. 1, CCG010046. 1, CCG012402. 1, CCG008742. 1, CCG011228. 1, CCG020929. 1, CCG014647. 1, CCG001012. 1, CCG017696. 1, CCG016883. 1, CCG022929. 1, CCG007830. 1, CCG003775. 1, CCG008152. 1, CCG018930. 1, CCG007702. 1, CCG025036. 1, CCG027014. 1, |
| GO:0006370 | 7-methylguanosine mRNA capping          | 2 of 4104 in the list   | 6 of 8404 in the genome   | 1 | CCG007177. 1, CCG012557. 1                                                                                                                                                                                                                                                                                                                                                                                                                                                                                                                                                                                                                                                                                                                                                                                                                                                                                                                                                                                                                                                                                                                                                                                                                                                                                                                                                                                                                                                                                                                                                                                                                                                                                                                                                                                                                                                                                                                                        |
| GO:0032507 | maintenance of protein location in cell | 2 of 4104 in the list   | 6 of 8404 in the genome   | 1 | CCG014318. 1, CCG003587. 1                                                                                                                                                                                                                                                                                                                                                                                                                                                                                                                                                                                                                                                                                                                                                                                                                                                                                                                                                                                                                                                                                                                                                                                                                                                                                                                                                                                                                                                                                                                                                                                                                                                                                                                                                                                                                                                                                                                                        |
| GO:0045185 | maintenance of protein location         | 2 of 4104 in the list   | 6 of 8404 in the genome   | 1 | CCG014318. 1, CCG003587. 1                                                                                                                                                                                                                                                                                                                                                                                                                                                                                                                                                                                                                                                                                                                                                                                                                                                                                                                                                                                                                                                                                                                                                                                                                                                                                                                                                                                                                                                                                                                                                                                                                                                                                                                                                                                                                                                                                                                                        |
| GO:0046836 | glycolipid transport                    | 2 of 4104 in the list   | 6 of 8404 in the genome   | 1 | CCG013408. 2, CCG024032. 1                                                                                                                                                                                                                                                                                                                                                                                                                                                                                                                                                                                                                                                                                                                                                                                                                                                                                                                                                                                                                                                                                                                                                                                                                                                                                                                                                                                                                                                                                                                                                                                                                                                                                                                                                                                                                                                                                                                                        |

|            |                                      |                        |                          |   |                                                                                                                                                                                                                                                                                                                                                                                                                                                                                                                                                                 |
|------------|--------------------------------------|------------------------|--------------------------|---|-----------------------------------------------------------------------------------------------------------------------------------------------------------------------------------------------------------------------------------------------------------------------------------------------------------------------------------------------------------------------------------------------------------------------------------------------------------------------------------------------------------------------------------------------------------------|
| GO:0051235 | maintenance of location              | 2 of 4104 in the list  | 6 of 8404 in the genome  | 1 | CCG014318.1, CCG003587.1                                                                                                                                                                                                                                                                                                                                                                                                                                                                                                                                        |
| GO:0051651 | maintenance of location in cell      | 2 of 4104 in the list  | 6 of 8404 in the genome  | 1 | CCG014318.1, CCG003587.1                                                                                                                                                                                                                                                                                                                                                                                                                                                                                                                                        |
| GO:1901264 | carbohydrate derivative transport    | 2 of 4104 in the list  | 6 of 8404 in the genome  | 1 | CCG013408.2, CCG024032.1                                                                                                                                                                                                                                                                                                                                                                                                                                                                                                                                        |
| GO:0016482 | cytoplasmic transport                | 42 of 4104 in the list | 97 of 8404 in the genome | 1 | CCG018832.1, CCG007060.1, CCG001809.1, CCG015800.2, CCG018217.1, CCG013042.1, CCG004573.1, CCG020949.1, CCG021221.1, CCG004869.1, CCG015386.1, CCG019020.1, CCG012550.1, CCG02771.1, CCG006924.1, CCG021220.1, CCG028498.1, CCG019797.1, CCG011006.1, CCG015087.1, CCG017077.1, CCG000010.1, CCG013641.1, CCG000614.1, CCG011567.1, CCG003495.1, CCG017078.1, CCG011696.1, CCG026336.1, CCG019629.2, CCG016542.1, CCG020806.1, CCG007989.1, CCG020909.1, CCG018447.1, CCG026989.1, CCG008116.1, CCG006714.1, CCG021152.1, CCG010178.1, CCG017874.1, CCG006777.1 |
| GO:0007601 | visual perception                    | 8 of 4104 in the list  | 21 of 8404 in the genome | 1 | CCG017696.1, CCG009531.1, CCG012989.1, CCG012988.1, CCG018930.1, CCG004238.1, CCG007317.1, CCG010071.1                                                                                                                                                                                                                                                                                                                                                                                                                                                          |
| GO:0043603 | cellular amide metabolic process     | 8 of 4104 in the list  | 21 of 8404 in the genome | 1 | CCG006821.1, CCG010174.2, CCG002897.1, CCG003865.1, CCG026099.1, CCG024133.1, CCG003192.1, CCG009333.1                                                                                                                                                                                                                                                                                                                                                                                                                                                          |
| GO:0050953 | sensory perception of light stimulus | 8 of 4104 in the list  | 21 of 8404 in the genome | 1 | CCG017696.1, CCG009531.1, CCG012989.1, CCG012988.1, CCG018930.1, CCG004238.1, CCG007317.1, CCG010071.1                                                                                                                                                                                                                                                                                                                                                                                                                                                          |

|            |               |                         |                           |   |                                                                                                                                                                                                                                                                                                                                                                                                                                                                                                                                                                                                                                                                                                                                                                                                                                                                                                                                                                                                                                                                                                                                                                                                                                                                                                                                                                                                                                                                                                                                                                                                                                                                                                                                                                                                                                                                                                                                                                   |
|------------|---------------|-------------------------|---------------------------|---|-------------------------------------------------------------------------------------------------------------------------------------------------------------------------------------------------------------------------------------------------------------------------------------------------------------------------------------------------------------------------------------------------------------------------------------------------------------------------------------------------------------------------------------------------------------------------------------------------------------------------------------------------------------------------------------------------------------------------------------------------------------------------------------------------------------------------------------------------------------------------------------------------------------------------------------------------------------------------------------------------------------------------------------------------------------------------------------------------------------------------------------------------------------------------------------------------------------------------------------------------------------------------------------------------------------------------------------------------------------------------------------------------------------------------------------------------------------------------------------------------------------------------------------------------------------------------------------------------------------------------------------------------------------------------------------------------------------------------------------------------------------------------------------------------------------------------------------------------------------------------------------------------------------------------------------------------------------------|
| GO:0006811 | ion transport | 175 of 4104 in the list | 381 of 8404 in the genome | 1 | CCG007640. 1, CCG000855. 1, CCG010623. 2, CCG003545. 1, CCG015823. 1, CCG021740. 1, CCG004086. 1, CCG021738. 1, CCG000585. 1, CCG006587. 2, CCG008826. 1, CCG025989. 2, CCG000300. 1, CCG003878. 1, CCG027758. 1, CCG005277. 1, CCG000723. 1, CCG009481. 1, CCG016326. 1, CCG013708. 1, CCG000118. 1, CCG003712. 1, CCG027184. 1, CCG020377. 1, CCG009367. 1, CCG012061. 1, CCG027185. 1, CCG015647. 1, CCG006486. 1, CCG016959. 1, CCG026667. 1, CCG019190. 1, CCG025450. 1, CCG018661. 1, CCG016654. 1, CCG018133. 1, CCG020840. 1, CCG023314. 1, CCG014240. 1, CCG016661. 1, CCG026050. 1, CCG001964. 1, CCG021349. 1, CCG007906. 1, CCG004637. 1, CCG014710. 1, CCG023640. 1, CCG007743. 1, CCG026796. 1, CCG022916. 1, CCG009808. 1, CCG025348. 1, CCG019191. 1, CCG003662. 1, CCG012534. 1, CCG019619. 1, CCG006588. 2, CCG014951. 1, CCG024222. 1, CCG014156. 1, CCG024383. 1, CCG001145. 1, CCG005769. 1, CCG021686. 1, CCG014158. 1, CCG015914. 1, CCG026240. 1, CCG023153. 3, CCG019678. 1, CCG012705. 1, CCG026363. 1, CCG014000. 1, CCG027756. 1, CCG023191. 1, CCG024590. 1, CCG017477. 1, CCG006004. 1, CCG015410. 1, CCG009142. 1, CCG022168. 1, CCG014949. 1, CCG019647. 1, CCG014950. 1, CCG005768. 1, CCG027182. 1, CCG016864. 1, CCG013635. 1, CCG008734. 1, CCG000983. 1, CCG010416. 1, CCG023530. 2, CCG000927. 1, CCG001285. 1, CCG017693. 1, CCG001584. 1, CCG013634. 1, CCG007954. 1, CCG024132. 1, CCG004309. 1, CCG008422. 1, CCG015612. 1, CCG009327. 1, CCG003867. 1, CCG010112. 1, CCG016350. 1, CCG000272. 1, CCG007334. 1, CCG014448. 1, CCG018801. 1, CCG027154. 1, CCG028221. 1, CCG010222. 1, CCG005496. 1, CCG013643. 1, CCG015646. 1, CCG002038. 1, CCG022137. 1, CCG025467. 2, CCG009992. 1, CCG025964. 1, CCG027585. 1, CCG001279. 1, CCG000148. 1, CCG023190. 1, CCG025510. 1, CCG005924. 2, CCG025632. 1, CCG000302. 1, CCG008587. 1, CCG002559. 1, CCG015653. 1, CCG015384. 1, CCG027498. 1, CCG021934. 1, CCG019890. 1, |
|------------|---------------|-------------------------|---------------------------|---|-------------------------------------------------------------------------------------------------------------------------------------------------------------------------------------------------------------------------------------------------------------------------------------------------------------------------------------------------------------------------------------------------------------------------------------------------------------------------------------------------------------------------------------------------------------------------------------------------------------------------------------------------------------------------------------------------------------------------------------------------------------------------------------------------------------------------------------------------------------------------------------------------------------------------------------------------------------------------------------------------------------------------------------------------------------------------------------------------------------------------------------------------------------------------------------------------------------------------------------------------------------------------------------------------------------------------------------------------------------------------------------------------------------------------------------------------------------------------------------------------------------------------------------------------------------------------------------------------------------------------------------------------------------------------------------------------------------------------------------------------------------------------------------------------------------------------------------------------------------------------------------------------------------------------------------------------------------------|

|            |           |                         |                           |   |                                                                                                                                                                                                                                                                                                                                                                                                                                                                                                                                                                                                                                                                                                                                                                                                                                                                                                                                                                                                                                                                                                                                                                                                                                                                                                                                                                                                                                                                                                                                                                                                                                                                                                                                                                                                                                                                                                                                                                   |
|------------|-----------|-------------------------|---------------------------|---|-------------------------------------------------------------------------------------------------------------------------------------------------------------------------------------------------------------------------------------------------------------------------------------------------------------------------------------------------------------------------------------------------------------------------------------------------------------------------------------------------------------------------------------------------------------------------------------------------------------------------------------------------------------------------------------------------------------------------------------------------------------------------------------------------------------------------------------------------------------------------------------------------------------------------------------------------------------------------------------------------------------------------------------------------------------------------------------------------------------------------------------------------------------------------------------------------------------------------------------------------------------------------------------------------------------------------------------------------------------------------------------------------------------------------------------------------------------------------------------------------------------------------------------------------------------------------------------------------------------------------------------------------------------------------------------------------------------------------------------------------------------------------------------------------------------------------------------------------------------------------------------------------------------------------------------------------------------------|
| GO:0023052 | signaling | 312 of 4104 in the list | 669 of 8404 in the genome | 1 | CCG005254. 1, CCG010628. 1, CCG017420. 1, CCG028253. 1, CCG014340. 1, CCG012989. 1, CCG008603. 1, CCG008741. 1, CCG000646. 1, CCG019020. 1, CCG013398. 1, CCG026174. 1, CCG020785. 1, CCG011006. 1, CCG002841. 1, CCG010275. 1, CCG026360. 1, CCG011717. 1, CCG017266. 1, CCG012573. 1, CCG016689. 2, CCG016745. 1, CCG020709. 1, CCG014466. 1, CCG007993. 1, CCG015101. 1, CCG000659. 1, CCG027127. 1, CCG007335. 1, CCG018533. 1, CCG000647. 1, CCG000526. 1, CCG022281. 1, CCG027669. 1, CCG015967. 1, CCG008323. 1, CCG026537. 1, CCG021661. 1, CCG010071. 1, CCG013308. 1, CCG023579. 1, CCG009510. 1, CCG019717. 1, CCG025176. 1, CCG000078. 1, CCG008685. 1, CCG026109. 1, CCG024952. 1, CCG009980. 1, CCG014506. 1, CCG016252. 1, CCG004279. 1, CCG024663. 1, CCG003745. 1, CCG018494. 1, CCG008759. 1, CCG026953. 1, CCG009427. 1, CCG019493. 1, CCG002520. 1, CCG017591. 1, CCG023464. 1, CCG021284. 1, CCG001579. 1, CCG028136. 1, CCG013641. 1, CCG000732. 1, CCG003317. 1, CCG003495. 1, CCG017127. 1, CCG007951. 1, CCG006412. 1, CCG025131. 2, CCG016307. 1, CCG008444. 1, CCG017701. 1, CCG028486. 1, CCG018859. 3, CCG026695. 1, CCG014712. 1, CCG000876. 1, CCG014928. 1, CCG024664. 1, CCG015638. 1, CCG000789. 1, CCG024271. 1, CCG024662. 1, CCG026047. 1, CCG020978. 1, CCG008939. 1, CCG005531. 1, CCG017725. 1, CCG000111. 2, CCG014345. 2, CCG001759. 1, CCG028477. 1, CCG025899. 1, CCG019881. 1, CCG025035. 1, CCG000984. 1, CCG024639. 1, CCG020654. 1, CCG015426. 1, CCG023151. 1, CCG014509. 1, CCG009553. 1, CCG021902. 1, CCG017033. 1, CCG024918. 1, CCG023002. 1, CCG023662. 1, CCG007958. 1, CCG015583. 1, CCG012959. 1, CCG006013. 1, CCG017112. 1, CCG002413. 1, CCG013272. 2, CCG024595. 1, CCG010046. 1, CCG012402. 1, CCG008742. 1, CCG011228. 1, CCG020929. 1, CCG014647. 1, CCG001012. 1, CCG017696. 1, CCG016883. 1, CCG022929. 1, CCG007830. 1, CCG003775. 1, CCG008152. 1, CCG018930. 1, CCG005596. 1, CCG007702. 1, |
|------------|-----------|-------------------------|---------------------------|---|-------------------------------------------------------------------------------------------------------------------------------------------------------------------------------------------------------------------------------------------------------------------------------------------------------------------------------------------------------------------------------------------------------------------------------------------------------------------------------------------------------------------------------------------------------------------------------------------------------------------------------------------------------------------------------------------------------------------------------------------------------------------------------------------------------------------------------------------------------------------------------------------------------------------------------------------------------------------------------------------------------------------------------------------------------------------------------------------------------------------------------------------------------------------------------------------------------------------------------------------------------------------------------------------------------------------------------------------------------------------------------------------------------------------------------------------------------------------------------------------------------------------------------------------------------------------------------------------------------------------------------------------------------------------------------------------------------------------------------------------------------------------------------------------------------------------------------------------------------------------------------------------------------------------------------------------------------------------|

|            |                                        |                         |                           |   |                                                                                                                                                                                                                                                                                                                                                                                                                                                                                                                                                                                                                                                                                                                                                                                                                                                                                                                                                                                                                                                                                                                                                                                                                                                                                                                                                                                                                                                                                                                                                                                                                                                                                                                                                                                                                                                                                                                                                                   |
|------------|----------------------------------------|-------------------------|---------------------------|---|-------------------------------------------------------------------------------------------------------------------------------------------------------------------------------------------------------------------------------------------------------------------------------------------------------------------------------------------------------------------------------------------------------------------------------------------------------------------------------------------------------------------------------------------------------------------------------------------------------------------------------------------------------------------------------------------------------------------------------------------------------------------------------------------------------------------------------------------------------------------------------------------------------------------------------------------------------------------------------------------------------------------------------------------------------------------------------------------------------------------------------------------------------------------------------------------------------------------------------------------------------------------------------------------------------------------------------------------------------------------------------------------------------------------------------------------------------------------------------------------------------------------------------------------------------------------------------------------------------------------------------------------------------------------------------------------------------------------------------------------------------------------------------------------------------------------------------------------------------------------------------------------------------------------------------------------------------------------|
| GO:0044700 | single organism signaling              | 312 of 4104 in the list | 669 of 8404 in the genome | 1 | CCG005254. 1, CCG010628. 1, CCG017420. 1, CCG028253. 1, CCG014340. 1, CCG012989. 1, CCG008603. 1, CCG008741. 1, CCG000646. 1, CCG019020. 1, CCG013398. 1, CCG026174. 1, CCG020785. 1, CCG011006. 1, CCG002841. 1, CCG010275. 1, CCG026360. 1, CCG011717. 1, CCG017266. 1, CCG012573. 1, CCG016689. 2, CCG016745. 1, CCG020709. 1, CCG014466. 1, CCG007993. 1, CCG015101. 1, CCG000659. 1, CCG027127. 1, CCG007335. 1, CCG018533. 1, CCG000647. 1, CCG000526. 1, CCG022281. 1, CCG027669. 1, CCG015967. 1, CCG008323. 1, CCG026537. 1, CCG021661. 1, CCG010071. 1, CCG013308. 1, CCG023579. 1, CCG009510. 1, CCG019717. 1, CCG025176. 1, CCG000078. 1, CCG008685. 1, CCG026109. 1, CCG024952. 1, CCG009980. 1, CCG014506. 1, CCG016252. 1, CCG004279. 1, CCG024663. 1, CCG003745. 1, CCG018494. 1, CCG008759. 1, CCG026953. 1, CCG009427. 1, CCG019493. 1, CCG002520. 1, CCG017591. 1, CCG023464. 1, CCG021284. 1, CCG001579. 1, CCG028136. 1, CCG013641. 1, CCG000732. 1, CCG003317. 1, CCG003495. 1, CCG017127. 1, CCG007951. 1, CCG006412. 1, CCG025131. 2, CCG016307. 1, CCG008444. 1, CCG017701. 1, CCG028486. 1, CCG018859. 3, CCG026695. 1, CCG014712. 1, CCG000876. 1, CCG014928. 1, CCG024664. 1, CCG015638. 1, CCG000789. 1, CCG024271. 1, CCG024662. 1, CCG026047. 1, CCG020978. 1, CCG008939. 1, CCG005531. 1, CCG017725. 1, CCG000111. 2, CCG014345. 2, CCG001759. 1, CCG028477. 1, CCG025899. 1, CCG019881. 1, CCG025035. 1, CCG000984. 1, CCG024639. 1, CCG020654. 1, CCG015426. 1, CCG023151. 1, CCG014509. 1, CCG009553. 1, CCG021902. 1, CCG017033. 1, CCG024918. 1, CCG023002. 1, CCG023662. 1, CCG007958. 1, CCG015583. 1, CCG012959. 1, CCG006013. 1, CCG017112. 1, CCG002413. 1, CCG013272. 2, CCG024595. 1, CCG010046. 1, CCG012402. 1, CCG008742. 1, CCG011228. 1, CCG020929. 1, CCG014647. 1, CCG001012. 1, CCG017696. 1, CCG016883. 1, CCG022929. 1, CCG007830. 1, CCG003775. 1, CCG008152. 1, CCG018930. 1, CCG005596. 1, CCG007702. 1, |
| GO:0006888 | ER to Golgi vesicle-mediated transport | 5 of 4104 in the list   | 14 of 8404 in the genome  | 1 | CCG015800. 2, CCG015087. 1, CCG007989. 1, CCG013042. 1, CCG000010. 1                                                                                                                                                                                                                                                                                                                                                                                                                                                                                                                                                                                                                                                                                                                                                                                                                                                                                                                                                                                                                                                                                                                                                                                                                                                                                                                                                                                                                                                                                                                                                                                                                                                                                                                                                                                                                                                                                              |
| GO:0009611 | response to wounding                   | 7 of 4104 in the list   | 19 of 8404 in the genome  | 1 | CCG004753. 1, CCG024173. 1, CCG015596. 1, CCG008075. 1, CCG015458. 1, CCG005170. 1, CCG016035. 1                                                                                                                                                                                                                                                                                                                                                                                                                                                                                                                                                                                                                                                                                                                                                                                                                                                                                                                                                                                                                                                                                                                                                                                                                                                                                                                                                                                                                                                                                                                                                                                                                                                                                                                                                                                                                                                                  |

|            |                                                             |                        |                           |   |                                                                                                                                                                                                                                                                                                                                                                                                                                                                                                                                                                                                                                                      |
|------------|-------------------------------------------------------------|------------------------|---------------------------|---|------------------------------------------------------------------------------------------------------------------------------------------------------------------------------------------------------------------------------------------------------------------------------------------------------------------------------------------------------------------------------------------------------------------------------------------------------------------------------------------------------------------------------------------------------------------------------------------------------------------------------------------------------|
| GO:0065008 | regulation of biological quality                            | 45 of 4104 in the list | 105 of 8404 in the genome | 1 | CCG009285. 1, CCG005375. 1, CCG002466. 1, CCG012993. 1, CCG004548. 1, CCG006600. 1, CCG026796. 1, CCG012992. 1, CCG014566. 1, CCG008826. 1, CCG020637. 1, CCG022471. 1, CCG012678. 1, CCG004595. 1, CCG005714. 1, CCG016162. 1, CCG004446. 1, CCG016956. 1, CCG003587. 1, CCG020472. 1, CCG028221. 1, CCG012569. 1, CCG024590. 1, CCG020377. 1, CCG009063. 1, CCG006787. 1, CCG009992. 1, CCG028500. 2, CCG003104. 1, CCG005587. 1, CCG027430. 1, CCG014318. 1, CCG021250. 1, CCG001847. 1, CCG026500. 1, CCG000302. 1, CCG004445. 1, CCG013244. 3, CCG008323. 1, CCG008924. 1, CCG013245. 1, CCG020400. 2, CCG009674. 1, CCG027531. 2, CCG023671. 2 |
| GO:0048193 | Golgi vesicle transport                                     | 11 of 4104 in the list | 29 of 8404 in the genome  | 1 | CCG012550. 1, CCG007989. 1, CCG028498. 1, CCG026620. 1, CCG011862. 1, CCG020315. 1, CCG015087. 1, CCG015800. 2, CCG000010. 1, CCG013042. 1, CCG004573. 1                                                                                                                                                                                                                                                                                                                                                                                                                                                                                             |
| GO:0007602 | phototransduction                                           | 6 of 4104 in the list  | 17 of 8404 in the genome  | 1 | CCG017696. 1, CCG009531. 1, CCG012989. 1, CCG012988. 1, CCG007317. 1, CCG010071. 1                                                                                                                                                                                                                                                                                                                                                                                                                                                                                                                                                                   |
| GO:0009314 | response to radiation                                       | 6 of 4104 in the list  | 17 of 8404 in the genome  | 1 | CCG017696. 1, CCG009531. 1, CCG012989. 1, CCG012988. 1, CCG007317. 1, CCG010071. 1                                                                                                                                                                                                                                                                                                                                                                                                                                                                                                                                                                   |
| GO:0009416 | response to light stimulus                                  | 6 of 4104 in the list  | 17 of 8404 in the genome  | 1 | CCG017696. 1, CCG009531. 1, CCG012989. 1, CCG012988. 1, CCG007317. 1, CCG010071. 1                                                                                                                                                                                                                                                                                                                                                                                                                                                                                                                                                                   |
| GO:0009581 | detection of external stimulus                              | 6 of 4104 in the list  | 17 of 8404 in the genome  | 1 | CCG017696. 1, CCG009531. 1, CCG012989. 1, CCG012988. 1, CCG007317. 1, CCG010071. 1                                                                                                                                                                                                                                                                                                                                                                                                                                                                                                                                                                   |
| GO:0009582 | detection of abiotic stimulus                               | 6 of 4104 in the list  | 17 of 8404 in the genome  | 1 | CCG017696. 1, CCG009531. 1, CCG012989. 1, CCG012988. 1, CCG007317. 1, CCG010071. 1                                                                                                                                                                                                                                                                                                                                                                                                                                                                                                                                                                   |
| GO:0009583 | detection of light stimulus                                 | 6 of 4104 in the list  | 17 of 8404 in the genome  | 1 | CCG017696. 1, CCG009531. 1, CCG012989. 1, CCG012988. 1, CCG007317. 1, CCG010071. 1                                                                                                                                                                                                                                                                                                                                                                                                                                                                                                                                                                   |
| GO:0051606 | detection of stimulus                                       | 6 of 4104 in the list  | 17 of 8404 in the genome  | 1 | CCG017696. 1, CCG009531. 1, CCG012989. 1, CCG012988. 1, CCG007317. 1, CCG010071. 1                                                                                                                                                                                                                                                                                                                                                                                                                                                                                                                                                                   |
| GO:0005976 | polysaccharide metabolic process                            | 4 of 4104 in the list  | 12 of 8404 in the genome  | 1 | CCG022430. 1, CCG004760. 1, CCG025015. 2, CCG008130. 1                                                                                                                                                                                                                                                                                                                                                                                                                                                                                                                                                                                               |
| GO:0006614 | SRP-dependent cotranslational protein targeting to membrane | 4 of 4104 in the list  | 12 of 8404 in the genome  | 1 | CCG006714. 1, CCG018217. 1, CCG000614. 1, CCG020806. 1                                                                                                                                                                                                                                                                                                                                                                                                                                                                                                                                                                                               |
| GO:0007218 | neuropeptide signaling pathway                              | 4 of 4104 in the list  | 12 of 8404 in the genome  | 1 | CCG009427. 1, CCG022427. 1, CCG022367. 1, CCG017791. 1                                                                                                                                                                                                                                                                                                                                                                                                                                                                                                                                                                                               |
| GO:0044264 | cellular polysaccharide metabolic process                   | 4 of 4104 in the list  | 12 of 8404 in the genome  | 1 | CCG022430. 1, CCG004760. 1, CCG025015. 2, CCG008130. 1                                                                                                                                                                                                                                                                                                                                                                                                                                                                                                                                                                                               |
| GO:0045047 | protein targeting to ER                                     | 4 of 4104 in the list  | 12 of 8404 in the genome  | 1 | CCG006714. 1, CCG018217. 1, CCG000614. 1, CCG020806. 1                                                                                                                                                                                                                                                                                                                                                                                                                                                                                                                                                                                               |

|            |                                                                |                        |                           |   |                                                                                                                                                                                                                                                                                                                                                                                                                                                                                                                                                                                            |
|------------|----------------------------------------------------------------|------------------------|---------------------------|---|--------------------------------------------------------------------------------------------------------------------------------------------------------------------------------------------------------------------------------------------------------------------------------------------------------------------------------------------------------------------------------------------------------------------------------------------------------------------------------------------------------------------------------------------------------------------------------------------|
| GO:0072599 | establishment of protein localization to endoplasmic reticulum | 4 of 4104 in the list  | 12 of 8404 in the genome  | 1 | CCG006714.1, CCG018217.1, CCG000614.1, CCG020806.1                                                                                                                                                                                                                                                                                                                                                                                                                                                                                                                                         |
| GO:0009187 | cyclic nucleotide metabolic process                            | 8 of 4104 in the list  | 22 of 8404 in the genome  | 1 | CCG007993.1, CCG014379.1, CCG026174.1, CCG000016.1, CCG013365.1, CCG026047.1, CCG026898.1, CCG010944.1                                                                                                                                                                                                                                                                                                                                                                                                                                                                                     |
| GO:0009190 | cyclic nucleotide biosynthetic process                         | 8 of 4104 in the list  | 22 of 8404 in the genome  | 1 | CCG007993.1, CCG014379.1, CCG026174.1, CCG000016.1, CCG013365.1, CCG026047.1, CCG026898.1, CCG010944.1                                                                                                                                                                                                                                                                                                                                                                                                                                                                                     |
| GO:0055076 | transition metal ion homeostasis                               | 8 of 4104 in the list  | 22 of 8404 in the genome  | 1 | CCG000302.1, CCG016162.1, CCG009992.1, CCG003104.1, CCG008826.1, CCG024590.1, CCG012569.1, CCG020377.1                                                                                                                                                                                                                                                                                                                                                                                                                                                                                     |
| GO:0030258 | lipid modification                                             | 13 of 4104 in the list | 34 of 8404 in the genome  | 1 | CCG000789.1, CCG024778.1, CCG019820.1, CCG006391.1, CCG023393.1, CCG012959.1, CCG015130.1, CCG025521.1, CCG018851.1, CCG006213.1, CCG011658.1, CCG000591.1, CCG024903.1                                                                                                                                                                                                                                                                                                                                                                                                                    |
| GO:0008610 | lipid biosynthetic process                                     | 44 of 4104 in the list | 104 of 8404 in the genome | 1 | CCG004532.1, CCG009244.1, CCG012002.1, CCG000663.1, CCG013131.1, CCG012408.1, CCG026370.1, CCG004806.1, CCG022352.1, CCG003249.1, CCG007330.1, CCG017097.1, CCG011531.1, CCG001102.1, CCG005923.1, CCG021610.1, CCG027312.1, CCG024155.1, CCG023102.1, CCG019263.1, CCG017241.1, CCG022209.1, CCG011183.1, CCG019857.1, CCG014839.1, CCG009434.1, CCG022134.1, CCG012308.1, CCG016653.1, CCG025889.1, CCG000552.1, CCG018615.3, CCG024760.1, CCG024095.1, CCG028332.1, CCG023757.1, CCG019035.1, CCG015411.1, CCG006965.1, CCG014174.1, CCG003751.1, CCG024612.1, CCG019909.1, CCG020408.1 |
| GO:0000270 | peptidoglycan metabolic process                                | 5 of 4104 in the list  | 15 of 8404 in the genome  | 1 | CCG020799.1, CCG019470.1, CCG015907.1, CCG028235.1, CCG005029.1                                                                                                                                                                                                                                                                                                                                                                                                                                                                                                                            |
| GO:0006027 | glycosaminoglycan catabolic process                            | 5 of 4104 in the list  | 15 of 8404 in the genome  | 1 | CCG020799.1, CCG019470.1, CCG015907.1, CCG028235.1, CCG005029.1                                                                                                                                                                                                                                                                                                                                                                                                                                                                                                                            |
| GO:0009253 | peptidoglycan catabolic process                                | 5 of 4104 in the list  | 15 of 8404 in the genome  | 1 | CCG020799.1, CCG019470.1, CCG015907.1, CCG028235.1, CCG005029.1                                                                                                                                                                                                                                                                                                                                                                                                                                                                                                                            |
| GO:0015698 | inorganic anion transport                                      | 5 of 4104 in the list  | 15 of 8404 in the genome  | 1 | CCG017477.1, CCG006770.1, CCG028221.1, CCG023244.1, CCG027185.1                                                                                                                                                                                                                                                                                                                                                                                                                                                                                                                            |
| GO:0006879 | cellular iron ion homeostasis                                  | 7 of 4104 in the list  | 20 of 8404 in the genome  | 1 | CCG003104.1, CCG000302.1, CCG008826.1, CCG009992.1, CCG012569.1, CCG024590.1, CCG020377.1                                                                                                                                                                                                                                                                                                                                                                                                                                                                                                  |
| GO:0046916 | cellular transition metal ion homeostasis                      | 7 of 4104 in the list  | 20 of 8404 in the genome  | 1 | CCG003104.1, CCG000302.1, CCG008826.1, CCG009992.1, CCG012569.1, CCG024590.1, CCG020377.1                                                                                                                                                                                                                                                                                                                                                                                                                                                                                                  |
| GO:0055072 | iron ion homeostasis                                           | 7 of 4104 in the list  | 20 of 8404 in the genome  | 1 | CCG003104.1, CCG000302.1, CCG008826.1, CCG009992.1, CCG012569.1, CCG024590.1, CCG020377.1                                                                                                                                                                                                                                                                                                                                                                                                                                                                                                  |



|            |                                        |                        |                           |   |                                                                                                                                                                                                                                                                                                                                                                                                                                                                                                                                                                                                                      |
|------------|----------------------------------------|------------------------|---------------------------|---|----------------------------------------------------------------------------------------------------------------------------------------------------------------------------------------------------------------------------------------------------------------------------------------------------------------------------------------------------------------------------------------------------------------------------------------------------------------------------------------------------------------------------------------------------------------------------------------------------------------------|
| GO:0009113 | purine nucleobase biosynthetic process | 2 of 4104 in the list  | 7 of 8404 in the genome   | 1 | CCG004257.1, CCG017331.1                                                                                                                                                                                                                                                                                                                                                                                                                                                                                                                                                                                             |
| GO:0022411 | cellular component disassembly         | 2 of 4104 in the list  | 7 of 8404 in the genome   | 1 | CCG000915.1, CCG009582.1                                                                                                                                                                                                                                                                                                                                                                                                                                                                                                                                                                                             |
| GO:0030154 | cell differentiation                   | 2 of 4104 in the list  | 7 of 8404 in the genome   | 1 | CCG021681.1, CCG013272.2                                                                                                                                                                                                                                                                                                                                                                                                                                                                                                                                                                                             |
| GO:0006813 | potassium ion transport                | 21 of 4104 in the list | 53 of 8404 in the genome  | 1 | CCG004308.1, CCG006469.1, CCG017693.1, CCG026314.1, CCG004309.1, CCG019647.1, CCG019191.1, CCG006587.2, CCG006588.2, CCG019190.1, CCG000991.1, CCG014156.1, CCG027182.1, CCG016864.1, CCG008587.1, CCG002559.1, CCG023530.2, CCG001964.1, CCG014000.1, CCG019890.1, CCG027184.1                                                                                                                                                                                                                                                                                                                                      |
| GO:0016192 | vesicle-mediated transport             | 46 of 4104 in the list | 109 of 8404 in the genome | 1 | CCG026698.1, CCG013984.1, CCG013024.1, CCG000631.1, CCG020280.1, CCG016493.2, CCG026620.1, CCG017209.1, CCG027692.1, CCG015800.2, CCG013042.1, CCG004573.1, CCG016831.1, CCG012550.1, CCG028498.1, CCG011813.1, CCG020315.1, CCG015568.1, CCG015087.1, CCG000010.1, CCG013126.2, CCG023051.1, CCG016860.1, CCG023276.2, CCG008236.1, CCG016306.1, CCG027457.1, CCG002121.1, CCG022927.1, CCG021800.1, CCG005810.1, CCG014226.1, CCG008788.2, CCG027257.1, CCG010559.1, CCG020634.1, CCG025473.1, CCG007989.1, CCG007283.1, CCG026422.2, CCG026947.1, CCG023756.1, CCG011862.1, CCG016836.2, CCG027473.1, CCG002937.1 |
| GO:0006821 | chloride transport                     | 3 of 4104 in the list  | 10 of 8404 in the genome  | 1 | CCG017477.1, CCG006770.1, CCG028221.1                                                                                                                                                                                                                                                                                                                                                                                                                                                                                                                                                                                |

|            |                               |                         |                           |   |                                                                                                                                                                                                                                                                                                                                                                                                                                                                                                                                                                                                                                                                                                                                                                                                                                                                                                                                                                                                                                                                                                                                                                                                                                                                                                                                                                                                                                                                                                                                                                                                                                                                                                                                                                                                                                                                                                                                                                   |
|------------|-------------------------------|-------------------------|---------------------------|---|-------------------------------------------------------------------------------------------------------------------------------------------------------------------------------------------------------------------------------------------------------------------------------------------------------------------------------------------------------------------------------------------------------------------------------------------------------------------------------------------------------------------------------------------------------------------------------------------------------------------------------------------------------------------------------------------------------------------------------------------------------------------------------------------------------------------------------------------------------------------------------------------------------------------------------------------------------------------------------------------------------------------------------------------------------------------------------------------------------------------------------------------------------------------------------------------------------------------------------------------------------------------------------------------------------------------------------------------------------------------------------------------------------------------------------------------------------------------------------------------------------------------------------------------------------------------------------------------------------------------------------------------------------------------------------------------------------------------------------------------------------------------------------------------------------------------------------------------------------------------------------------------------------------------------------------------------------------------|
| GO:0071702 | organic substance transport   | 163 of 4104 in the list | 362 of 8404 in the genome | 1 | CCG017420. 1, CCG018832. 1, CCG002549. 1, CCG003146. 1, CCG011408. 1, CCG027762. 1, CCG001809. 1, CCG028124. 1, CCG020949. 1, CCG004026. 1, CCG003995. 1, CCG015386. 1, CCG019020. 1, CCG012550. 1, CCG002645. 1, CCG009428. 1, CCG027758. 1, CCG024905. 1, CCG011338. 1, CCG009607. 1, CCG011006. 1, CCG013708. 1, CCG002766. 1, CCG000614. 1, CCG011567. 1, CCG017078. 1, CCG011696. 1, CCG014307. 1, CCG005539. 1, CCG027457. 1, CCG002917. 1, CCG016959. 1, CCG027368. 1, CCG001220. 1, CCG026667. 1, CCG010939. 1, CCG007855. 1, CCG011858. 1, CCG024032. 1, CCG016541. 1, CCG020840. 1, CCG003786. 1, CCG006714. 1, CCG027473. 1, CCG021349. 1, CCG016673. 1, CCG001673. 1, CCG004637. 1, CCG009082. 1, CCG014506. 1, CCG018557. 1, CCG016493. 2, CCG026744. 1, CCG027564. 1, CCG006625. 1, CCG025309. 1, CCG004573. 1, CCG004869. 1, CCG000524. 1, CCG013408. 2, CCG022771. 1, CCG022910. 1, CCG024222. 1, CCG024383. 1, CCG026953. 1, CCG017373. 1, CCG006489. 1, CCG006924. 1, CCG005769. 1, CCG021220. 1, CCG017591. 1, CCG017137. 1, CCG013641. 1, CCG025233. 1, CCG021411. 1, CCG003495. 1, CCG001859. 1, CCG027241. 1, CCG005195. 1, CCG014226. 1, CCG020806. 1, CCG020634. 1, CCG010567. 3, CCG005768. 1, CCG026947. 1, CCG023756. 1, CCG008734. 1, CCG021152. 1, CCG017125. 1, CCG023526. 2, CCG026698. 1, CCG011766. 1, CCG005786. 1, CCG007060. 1, CCG023877. 1, CCG019590. 1, CCG027692. 1, CCG000210. 1, CCG001221. 1, CCG017612. 1, CCG016347. 1, CCG018800. 1, CCG017725. 1, CCG011813. 1, CCG005262. 1, CCG020315. 1, CCG015568. 1, CCG000010. 1, CCG017077. 1, CCG007827. 1, CCG014434. 1, CCG003531. 1, CCG025027. 1, CCG003334. 1, CCG023190. 1, CCG019103. 1, CCG019629. 2, CCG027257. 1, CCG007283. 1, CCG002374. 1, CCG020909. 1, CCG018447. 1, CCG016966. 1, CCG026989. 1, CCG010178. 1, CCG006777. 1, CCG013984. 1, CCG001172. 1, CCG020280. 1, CCG020929. 1, CCG026620. 1, CCG015800. 2, CCG018217. 1, CCG003775. 1, CCG016831. 1, |
| GO:0006605 | protein targeting             | 19 of 4104 in the list  | 49 of 8404 in the genome  | 1 | CCG011766. 1, CCG018832. 1, CCG000614. 1, CCG017078. 1, CCG001809. 1, CCG011696. 1, CCG027564. 1, CCG018217. 1, CCG004573. 1, CCG020949. 1, CCG020806. 1, CCG022771. 1, CCG012550. 1, CCG028498. 1, CCG006714. 1, CCG019797. 1, CCG017077. 1, CCG002766. 1, CCG010178. 1                                                                                                                                                                                                                                                                                                                                                                                                                                                                                                                                                                                                                                                                                                                                                                                                                                                                                                                                                                                                                                                                                                                                                                                                                                                                                                                                                                                                                                                                                                                                                                                                                                                                                          |
| GO:0006612 | protein targeting to membrane | 4 of 4104 in the list   | 13 of 8404 in the genome  | 1 | CCG006714. 1, CCG018217. 1, CCG000614. 1, CCG020806. 1                                                                                                                                                                                                                                                                                                                                                                                                                                                                                                                                                                                                                                                                                                                                                                                                                                                                                                                                                                                                                                                                                                                                                                                                                                                                                                                                                                                                                                                                                                                                                                                                                                                                                                                                                                                                                                                                                                            |

|            |                                                        |                        |                           |   |                                                                                                                                                                                                                                                                                                                                                                                                                                                                                                                                                                                                                                                                                                |
|------------|--------------------------------------------------------|------------------------|---------------------------|---|------------------------------------------------------------------------------------------------------------------------------------------------------------------------------------------------------------------------------------------------------------------------------------------------------------------------------------------------------------------------------------------------------------------------------------------------------------------------------------------------------------------------------------------------------------------------------------------------------------------------------------------------------------------------------------------------|
| GO:0006613 | cotranslational protein targeting to membrane          | 4 of 4104 in the list  | 13 of 8404 in the genome  | 1 | CCG006714. 1, CCG018217. 1, CCG000614. 1, CCG020806. 1                                                                                                                                                                                                                                                                                                                                                                                                                                                                                                                                                                                                                                         |
| GO:0006511 | ubiquitin-dependent protein catabolic process          | 48 of 4104 in the list | 115 of 8404 in the genome | 1 | CCG005241. 1, CCG003060. 1, CCG008217. 1, CCG027068. 1, CCG001704. 1, CCG007080. 1, CCG019394. 1, CCG001350. 1, CCG010600. 1, CCG011238. 1, CCG007937. 2, CCG019571. 1, CCG019599. 1, CCG010879. 1, CCG001877. 1, CCG012628. 1, CCG003288. 1, CCG004331. 1, CCG028137. 1, CCG008969. 2, CCG022635. 1, CCG009737. 1, CCG002938. 1, CCG024679. 1, CCG012828. 1, CCG021825. 3, CCG001101. 1, CCG013093. 1, CCG027000. 1, CCG003809. 1, CCG001769. 1, CCG027283. 1, CCG003858. 1, CCG026413. 3, CCG026999. 1, CCG028595. 1, CCG005441. 1, CCG023684. 1, CCG022742. 2, CCG002974. 1, CCG014222. 1, CCG013876. 1, CCG027945. 1, CCG027763. 1, CCG001217. 1, CCG014393. 1, CCG004134. 1, CCG019932. 1 |
| GO:0019941 | modification-dependent protein catabolic process       | 48 of 4104 in the list | 115 of 8404 in the genome | 1 | CCG005241. 1, CCG003060. 1, CCG008217. 1, CCG027068. 1, CCG001704. 1, CCG007080. 1, CCG019394. 1, CCG001350. 1, CCG010600. 1, CCG011238. 1, CCG007937. 2, CCG019571. 1, CCG019599. 1, CCG010879. 1, CCG001877. 1, CCG012628. 1, CCG003288. 1, CCG004331. 1, CCG028137. 1, CCG008969. 2, CCG022635. 1, CCG009737. 1, CCG002938. 1, CCG024679. 1, CCG012828. 1, CCG021825. 3, CCG001101. 1, CCG013093. 1, CCG027000. 1, CCG003809. 1, CCG001769. 1, CCG027283. 1, CCG003858. 1, CCG026413. 3, CCG026999. 1, CCG028595. 1, CCG005441. 1, CCG023684. 1, CCG022742. 2, CCG002974. 1, CCG014222. 1, CCG013876. 1, CCG027945. 1, CCG027763. 1, CCG001217. 1, CCG014393. 1, CCG004134. 1, CCG019932. 1 |
| GO:0043632 | modification-dependent macromolecule catabolic process | 48 of 4104 in the list | 115 of 8404 in the genome | 1 | CCG005241. 1, CCG003060. 1, CCG008217. 1, CCG027068. 1, CCG001704. 1, CCG007080. 1, CCG019394. 1, CCG001350. 1, CCG010600. 1, CCG011238. 1, CCG007937. 2, CCG019571. 1, CCG019599. 1, CCG010879. 1, CCG001877. 1, CCG012628. 1, CCG003288. 1, CCG004331. 1, CCG028137. 1, CCG008969. 2, CCG022635. 1, CCG009737. 1, CCG002938. 1, CCG024679. 1, CCG012828. 1, CCG021825. 3, CCG001101. 1, CCG013093. 1, CCG027000. 1, CCG003809. 1, CCG001769. 1, CCG027283. 1, CCG003858. 1, CCG026413. 3, CCG026999. 1, CCG028595. 1, CCG005441. 1, CCG023684. 1, CCG022742. 2, CCG002974. 1, CCG014222. 1, CCG013876. 1, CCG027945. 1, CCG027763. 1, CCG001217. 1, CCG014393. 1, CCG004134. 1, CCG019932. 1 |

|            |                                                    |                        |                           |   |                                                                                                                                                                                                                                                                                                                                                                                                                                                                                                                                                                                                                                                                                                                                                                                                                                                                                                                                                                                                                                                                                                                                    |
|------------|----------------------------------------------------|------------------------|---------------------------|---|------------------------------------------------------------------------------------------------------------------------------------------------------------------------------------------------------------------------------------------------------------------------------------------------------------------------------------------------------------------------------------------------------------------------------------------------------------------------------------------------------------------------------------------------------------------------------------------------------------------------------------------------------------------------------------------------------------------------------------------------------------------------------------------------------------------------------------------------------------------------------------------------------------------------------------------------------------------------------------------------------------------------------------------------------------------------------------------------------------------------------------|
| GO:0009057 | macromolecule catabolic process                    | 78 of 4104 in the list | 181 of 8404 in the genome | 1 | CCG003060. 1, CCG027068. 1, CCG001704. 1, CCG007080. 1, CCG005524. 1, CCG001350. 1, CCG019599. 1, CCG012628. 1, CCG003288. 1, CCG020685. 1, CCG022635. 1, CCG004020. 1, CCG016477. 1, CCG012048. 1, CCG004448. 2, CCG005029. 1, CCG012828. 1, CCG021825. 3, CCG015610. 1, CCG020799. 1, CCG001101. 1, CCG027000. 1, CCG013093. 1, CCG003809. 1, CCG003858. 1, CCG020793. 1, CCG028595. 1, CCG026999. 1, CCG026413. 3, CCG005441. 1, CCG023684. 1, CCG023890. 1, CCG002974. 1, CCG014222. 1, CCG013876. 1, CCG027945. 1, CCG019674. 1, CCG014393. 1, CCG001217. 1, CCG023270. 1, CCG010019. 1, CCG004134. 1, CCG005241. 1, CCG008217. 1, CCG019394. 1, CCG010600. 1, CCG002418. 1, CCG011238. 1, CCG007937. 2, CCG019571. 1, CCG018917. 1, CCG010879. 1, CCG001877. 1, CCG007690. 1, CCG004331. 1, CCG021117. 1, CCG028137. 1, CCG008969. 2, CCG025962. 1, CCG013832. 1, CCG012164. 1, CCG009737. 1, CCG002938. 1, CCG024679. 1, CCG019470. 1, CCG015907. 1, CCG001769. 1, CCG027283. 1, CCG009582. 1, CCG024829. 1, CCG028235. 1, CCG022742. 2, CCG002417. 1, CCG023420. 1, CCG027763. 1, CCG011996. 1, CCG026612. 1, CCG019932. 1 |
| GO:0040007 | growth                                             | 9 of 4104 in the list  | 26 of 8404 in the genome  | 1 | CCG004753. 1, CCG008075. 1, CCG015458. 1, CCG020988. 1, CCG007219. 1, CCG015596. 1, CCG007821. 1, CCG002448. 1, CCG016035. 1                                                                                                                                                                                                                                                                                                                                                                                                                                                                                                                                                                                                                                                                                                                                                                                                                                                                                                                                                                                                       |
| GO:0072594 | establishment of protein localization to organelle | 16 of 4104 in the list | 43 of 8404 in the genome  | 1 | CCG018832. 1, CCG000614. 1, CCG017078. 1, CCG001809. 1, CCG011696. 1, CCG018217. 1, CCG004573. 1, CCG020949. 1, CCG020806. 1, CCG022771. 1, CCG012550. 1, CCG028498. 1, CCG006714. 1, CCG019797. 1, CCG017077. 1, CCG010178. 1                                                                                                                                                                                                                                                                                                                                                                                                                                                                                                                                                                                                                                                                                                                                                                                                                                                                                                     |

|            |                                  |                        |                           |   |                                                                                                                                                                                                                                                                                                                                                                                                                                                                                                                                                                                                                                                                                                                                                                                                                                                                                                                  |
|------------|----------------------------------|------------------------|---------------------------|---|------------------------------------------------------------------------------------------------------------------------------------------------------------------------------------------------------------------------------------------------------------------------------------------------------------------------------------------------------------------------------------------------------------------------------------------------------------------------------------------------------------------------------------------------------------------------------------------------------------------------------------------------------------------------------------------------------------------------------------------------------------------------------------------------------------------------------------------------------------------------------------------------------------------|
| GO:0044255 | cellular lipid metabolic process | 63 of 4104 in the list | 149 of 8404 in the genome | 1 | CCG004532. 1, CCG000789. 1, CCG021085. 1, CCG019820. 1, CCG009244. 1, CCG023393. 1, CCG012002. 1, CCG013509. 1, CCG000663. 1, CCG013131. 1, CCG012408. 1, CCG026370. 1, CCG015351. 1, CCG004806. 1, CCG000591. 1, CCG024092. 1, CCG022352. 1, CCG003249. 1, CCG012875. 1, CCG007330. 1, CCG019082. 1, CCG006391. 1, CCG017097. 1, CCG015130. 1, CCG011531. 1, CCG001102. 1, CCG005923. 1, CCG021610. 1, CCG027312. 1, CCG024155. 1, CCG023102. 1, CCG025233. 1, CCG022209. 1, CCG017241. 1, CCG024778. 1, CCG009434. 1, CCG014839. 1, CCG025521. 1, CCG022134. 1, CCG012308. 1, CCG006213. 1, CCG016653. 1, CCG025889. 1, CCG011658. 1, CCG000552. 1, CCG018615. 3, CCG024903. 1, CCG024760. 1, CCG017994. 1, CCG028332. 1, CCG023757. 1, CCG023779. 1, CCG019035. 1, CCG015411. 1, CCG012959. 1, CCG006965. 1, CCG025552. 1, CCG018851. 1, CCG014174. 1, CCG019697. 2, CCG003751. 1, CCG024612. 1, CCG019909. 1 |
|------------|----------------------------------|------------------------|---------------------------|---|------------------------------------------------------------------------------------------------------------------------------------------------------------------------------------------------------------------------------------------------------------------------------------------------------------------------------------------------------------------------------------------------------------------------------------------------------------------------------------------------------------------------------------------------------------------------------------------------------------------------------------------------------------------------------------------------------------------------------------------------------------------------------------------------------------------------------------------------------------------------------------------------------------------|

|            |                                     |                          |                            |   |                                                                                                                                                                                                                                                                                                                                                                                                                                                                                                                                                                                                                                                                                                                                                                                                                                                                                                                                                                                                                                                                                                                                                                                                                                                                                                                                                                                                                                                                                                                                                                                                                                                                                                                                                                                                                                                                                                                                                                   |
|------------|-------------------------------------|--------------------------|----------------------------|---|-------------------------------------------------------------------------------------------------------------------------------------------------------------------------------------------------------------------------------------------------------------------------------------------------------------------------------------------------------------------------------------------------------------------------------------------------------------------------------------------------------------------------------------------------------------------------------------------------------------------------------------------------------------------------------------------------------------------------------------------------------------------------------------------------------------------------------------------------------------------------------------------------------------------------------------------------------------------------------------------------------------------------------------------------------------------------------------------------------------------------------------------------------------------------------------------------------------------------------------------------------------------------------------------------------------------------------------------------------------------------------------------------------------------------------------------------------------------------------------------------------------------------------------------------------------------------------------------------------------------------------------------------------------------------------------------------------------------------------------------------------------------------------------------------------------------------------------------------------------------------------------------------------------------------------------------------------------------|
| GO:0044238 | primary metabolic process           | 2012 of 4104 in the list | 4200 of 8404 in the genome | 1 | CCG014531. 2, CCG006922. 1, CCG017420. 1, CCG027068. 1, CCG014396. 1, CCG004122. 1, CCG006549. 1, CCG007885. 1, CCG004887. 1, CCG006912. 1, CCG026106. 1, CCG016952. 1, CCG012875. 1, CCG025108. 1, CCG028016. 1, CCG026174. 1, CCG004468. 1, CCG023989. 1, CCG012726. 1, CCG019308. 1, CCG024584. 1, CCG004020. 1, CCG001292. 1, CCG018432. 1, CCG001040. 1, CCG017266. 1, CCG006875. 2, CCG028198. 1, CCG011763. 1, CCG005616. 1, CCG016689. 2, CCG025208. 1, CCG021479. 1, CCG003362. 1, CCG002634. 1, CCG023381. 1, CCG019382. 1, CCG019735. 1, CCG020956. 1, CCG017289. 1, CCG016094. 1, CCG026413. 3, CCG023474. 1, CCG017255. 1, CCG026871. 2, CCG010792. 1, CCG012623. 1, CCG022025. 2, CCG021616. 1, CCG019874. 1, CCG003767. 1, CCG005738. 1, CCG013876. 1, CCG010905. 1, CCG008270. 1, CCG021110. 1, CCG010246. 1, CCG024612. 1, CCG027636. 1, CCG003624. 1, CCG028653. 1, CCG004569. 1, CCG020286. 1, CCG013109. 1, CCG006465. 1, CCG015074. 1, CCG019571. 1, CCG008871. 1, CCG015694. 1, CCG018788. 1, CCG006484. 1, CCG002982. 1, CCG012083. 1, CCG026953. 1, CCG026602. 1, CCG023686. 1, CCG019678. 1, CCG007457. 1, CCG021737. 1, CCG025990. 1, CCG013641. 1, CCG027708. 4, CCG028590. 1, CCG015350. 1, CCG021948. 1, CCG018585. 3, CCG020651. 1, CCG007467. 1, CCG012840. 1, CCG014385. 1, CCG005284. 1, CCG004927. 1, CCG009805. 2, CCG005089. 1, CCG024903. 1, CCG021137. 1, CCG022056. 1, CCG013610. 1, CCG001876. 1, CCG012584. 1, CCG015186. 1, CCG012023. 1, CCG013465. 1, CCG016327. 2, CCG018688. 1, CCG024200. 1, CCG010624. 1, CCG002231. 1, CCG003608. 1, CCG012957. 1, CCG023502. 1, CCG028454. 1, CCG023458. 1, CCG027748. 1, CCG017001. 1, CCG021767. 1, CCG003520. 1, CCG024865. 1, CCG004926. 1, CCG006928. 1, CCG004532. 1, CCG000789. 1, CCG017381. 1, CCG005588. 1, CCG010912. 1, CCG004955. 1, CCG007874. 3, CCG001704. 1, CCG005524. 1, CCG001289. 1, CCG011547. 1, CCG013640. 1, CCG008404. 1, CCG018201. 1, CCG010136. 1, |
| GO:0048856 | anatomical structure development    | 8 of 4104 in the list    | 24 of 8404 in the genome   | 1 | CCG015767. 2, CCG004753. 1, CCG006750. 1, CCG028121. 1, CCG015596. 1, CCG008075. 1, CCG015458. 1, CCG016035. 1                                                                                                                                                                                                                                                                                                                                                                                                                                                                                                                                                                                                                                                                                                                                                                                                                                                                                                                                                                                                                                                                                                                                                                                                                                                                                                                                                                                                                                                                                                                                                                                                                                                                                                                                                                                                                                                    |
| GO:0000271 | polysaccharide biosynthetic process | 2 of 4104 in the list    | 8 of 8404 in the genome    | 1 | CCG022430. 1, CCG008130. 1                                                                                                                                                                                                                                                                                                                                                                                                                                                                                                                                                                                                                                                                                                                                                                                                                                                                                                                                                                                                                                                                                                                                                                                                                                                                                                                                                                                                                                                                                                                                                                                                                                                                                                                                                                                                                                                                                                                                        |
| GO:0006182 | cGMP biosynthetic process           | 2 of 4104 in the list    | 8 of 8404 in the genome    | 1 | CCG013365. 1, CCG026898. 1                                                                                                                                                                                                                                                                                                                                                                                                                                                                                                                                                                                                                                                                                                                                                                                                                                                                                                                                                                                                                                                                                                                                                                                                                                                                                                                                                                                                                                                                                                                                                                                                                                                                                                                                                                                                                                                                                                                                        |
| GO:0006825 | copper ion transport                | 2 of 4104 in the list    | 8 of 8404 in the genome    | 1 | CCG003878. 1, CCG000927. 1                                                                                                                                                                                                                                                                                                                                                                                                                                                                                                                                                                                                                                                                                                                                                                                                                                                                                                                                                                                                                                                                                                                                                                                                                                                                                                                                                                                                                                                                                                                                                                                                                                                                                                                                                                                                                                                                                                                                        |

|            |                                                     |                        |                           |   |                                                                                                                                                                                                                                                                                                                                                                                                                                                                                                                                                                                                                                                                                                                              |
|------------|-----------------------------------------------------|------------------------|---------------------------|---|------------------------------------------------------------------------------------------------------------------------------------------------------------------------------------------------------------------------------------------------------------------------------------------------------------------------------------------------------------------------------------------------------------------------------------------------------------------------------------------------------------------------------------------------------------------------------------------------------------------------------------------------------------------------------------------------------------------------------|
| GO:0033692 | cellular polysaccharide biosynthetic process        | 2 of 4104 in the list  | 8 of 8404 in the genome   | 1 | CCG022430.1, CCG008130.1                                                                                                                                                                                                                                                                                                                                                                                                                                                                                                                                                                                                                                                                                                     |
| GO:0042180 | cellular ketone metabolic process                   | 2 of 4104 in the list  | 8 of 8404 in the genome   | 1 | CCG006009.1, CCG006059.1                                                                                                                                                                                                                                                                                                                                                                                                                                                                                                                                                                                                                                                                                                     |
| GO:0046068 | cGMP metabolic process                              | 2 of 4104 in the list  | 8 of 8404 in the genome   | 1 | CCG013365.1, CCG026898.1                                                                                                                                                                                                                                                                                                                                                                                                                                                                                                                                                                                                                                                                                                     |
| GO:0052652 | cyclic purine nucleotide metabolic process          | 2 of 4104 in the list  | 8 of 8404 in the genome   | 1 | CCG013365.1, CCG026898.1                                                                                                                                                                                                                                                                                                                                                                                                                                                                                                                                                                                                                                                                                                     |
| GO:0006869 | lipid transport                                     | 10 of 4104 in the list | 29 of 8404 in the genome  | 1 | CCG027368.1, CCG001220.1, CCG013408.2, CCG011858.1, CCG024032.1, CCG006489.1, CCG005786.1, CCG011338.1, CCG000524.1, CCG001221.1                                                                                                                                                                                                                                                                                                                                                                                                                                                                                                                                                                                             |
| GO:0010876 | lipid localization                                  | 10 of 4104 in the list | 29 of 8404 in the genome  | 1 | CCG027368.1, CCG001220.1, CCG013408.2, CCG011858.1, CCG024032.1, CCG006489.1, CCG005786.1, CCG011338.1, CCG000524.1, CCG001221.1                                                                                                                                                                                                                                                                                                                                                                                                                                                                                                                                                                                             |
| GO:0006625 | protein targeting to peroxisome                     | 3 of 4104 in the list  | 11 of 8404 in the genome  | 1 | CCG018832.1, CCG019797.1, CCG010178.1                                                                                                                                                                                                                                                                                                                                                                                                                                                                                                                                                                                                                                                                                        |
| GO:0043574 | peroxisomal transport                               | 3 of 4104 in the list  | 11 of 8404 in the genome  | 1 | CCG018832.1, CCG019797.1, CCG010178.1                                                                                                                                                                                                                                                                                                                                                                                                                                                                                                                                                                                                                                                                                        |
| GO:0072662 | protein localization to peroxisome                  | 3 of 4104 in the list  | 11 of 8404 in the genome  | 1 | CCG018832.1, CCG019797.1, CCG010178.1                                                                                                                                                                                                                                                                                                                                                                                                                                                                                                                                                                                                                                                                                        |
| GO:0072663 | establishment of protein localization to peroxisome | 3 of 4104 in the list  | 11 of 8404 in the genome  | 1 | CCG018832.1, CCG019797.1, CCG010178.1                                                                                                                                                                                                                                                                                                                                                                                                                                                                                                                                                                                                                                                                                        |
| GO:0007264 | small GTPase mediated signal transduction           | 54 of 4104 in the list | 130 of 8404 in the genome | 1 | CCG010046.1, CCG017420.1, CCG002549.1, CCG025973.1, CCG007060.1, CCG020929.1, CCG009980.1, CCG014506.1, CCG016252.1, CCG028124.1, CCG008892.2, CCG003775.1, CCG008152.1, CCG004869.1, CCG024327.1, CCG015386.1, CCG019020.1, CCG026953.1, CCG017373.1, CCG017725.1, CCG006924.1, CCG021220.1, CCG009607.1, CCG011006.1, CCG017591.1, CCG007827.1, CCG014434.1, CCG028136.1, CCG013641.1, CCG016027.1, CCG021411.1, CCG003495.1, CCG025027.1, CCG022841.1, CCG017127.1, CCG001859.1, CCG014466.1, CCG026336.1, CCG019103.1, CCG019629.2, CCG002917.1, CCG025131.2, CCG016542.1, CCG026154.1, CCG015654.1, CCG020909.1, CCG022184.1, CCG018447.1, CCG016966.1, CCG018222.1, CCG021152.1, CCG023526.2, CCG025179.1, CCG006777.1 |

|            |                                          |                        |                           |   |                                                                                                                                                                                                                                                                                                                                                                                                                                                                                                                                                                                                                                                                                                                                                                                                                                                          |
|------------|------------------------------------------|------------------------|---------------------------|---|----------------------------------------------------------------------------------------------------------------------------------------------------------------------------------------------------------------------------------------------------------------------------------------------------------------------------------------------------------------------------------------------------------------------------------------------------------------------------------------------------------------------------------------------------------------------------------------------------------------------------------------------------------------------------------------------------------------------------------------------------------------------------------------------------------------------------------------------------------|
| GO:0044265 | cellular macromolecule catabolic process | 59 of 4104 in the list | 142 of 8404 in the genome | 1 | CCG005241. 1, CCG003060. 1, CCG008217. 1, CCG027068. 1, CCG001704. 1, CCG007080. 1, CCG019394. 1, CCG005524. 1, CCG001350. 1, CCG010600. 1, CCG011238. 1, CCG007937. 2, CCG018917. 1, CCG019571. 1, CCG019599. 1, CCG010879. 1, CCG001877. 1, CCG007690. 1, CCG012628. 1, CCG003288. 1, CCG004331. 1, CCG028137. 1, CCG020685. 1, CCG008969. 2, CCG022635. 1, CCG013832. 1, CCG012164. 1, CCG009737. 1, CCG002938. 1, CCG024679. 1, CCG004448. 2, CCG012828. 1, CCG021825. 3, CCG001101. 1, CCG013093. 1, CCG027000. 1, CCG003809. 1, CCG001769. 1, CCG027283. 1, CCG003858. 1, CCG028595. 1, CCG026999. 1, CCG026413. 3, CCG005441. 1, CCG009582. 1, CCG023684. 1, CCG022742. 2, CCG002974. 1, CCG014222. 1, CCG013876. 1, CCG027945. 1, CCG019674. 1, CCG023270. 1, CCG027763. 1, CCG001217. 1, CCG014393. 1, CCG004134. 1, CCG026612. 1, CCG019932. 1 |
|------------|------------------------------------------|------------------------|---------------------------|---|----------------------------------------------------------------------------------------------------------------------------------------------------------------------------------------------------------------------------------------------------------------------------------------------------------------------------------------------------------------------------------------------------------------------------------------------------------------------------------------------------------------------------------------------------------------------------------------------------------------------------------------------------------------------------------------------------------------------------------------------------------------------------------------------------------------------------------------------------------|



|            |                                    |                         |                           |   |                                                                                                                                                                                                                                                                                                                                                                                                                                                                                                                                                                                                                                                                                                                                                                                                                                                                                                                                                                                                                                                                                                                                                                                                                                                                                                                                                                                                                                                                                                                                                                                                                                                                                                                                                                                                                                                                                                                                                                   |
|------------|------------------------------------|-------------------------|---------------------------|---|-------------------------------------------------------------------------------------------------------------------------------------------------------------------------------------------------------------------------------------------------------------------------------------------------------------------------------------------------------------------------------------------------------------------------------------------------------------------------------------------------------------------------------------------------------------------------------------------------------------------------------------------------------------------------------------------------------------------------------------------------------------------------------------------------------------------------------------------------------------------------------------------------------------------------------------------------------------------------------------------------------------------------------------------------------------------------------------------------------------------------------------------------------------------------------------------------------------------------------------------------------------------------------------------------------------------------------------------------------------------------------------------------------------------------------------------------------------------------------------------------------------------------------------------------------------------------------------------------------------------------------------------------------------------------------------------------------------------------------------------------------------------------------------------------------------------------------------------------------------------------------------------------------------------------------------------------------------------|
| GO:0009059 | macromolecule biosynthetic process | 369 of 4104 in the list | 806 of 8404 in the genome | 1 | CCG014531. 2, CCG018536. 1, CCG023277. 1, CCG014396. 1, CCG006549. 1, CCG004807. 1, CCG010191. 3, CCG013430. 1, CCG009878. 1, CCG010647. 1, CCG026882. 1, CCG024517. 1, CCG018507. 1, CCG002354. 1, CCG004468. 1, CCG016238. 1, CCG026473. 1, CCG004091. 1, CCG001292. 1, CCG009653. 1, CCG018321. 1, CCG026825. 1, CCG002470. 1, CCG003573. 1, CCG028505. 1, CCG025472. 1, CCG025223. 1, CCG018432. 1, CCG015599. 1, CCG004398. 1, CCG025208. 1, CCG012213. 2, CCG026871. 2, CCG018719. 1, CCG013353. 1, CCG012623. 1, CCG008270. 1, CCG019210. 1, CCG027115. 1, CCG018799. 1, CCG020129. 1, CCG024612. 1, CCG005737. 1, CCG005276. 1, CCG024326. 1, CCG020877. 1, CCG021295. 1, CCG009249. 1, CCG006231. 1, CCG020286. 1, CCG014896. 1, CCG001863. 1, CCG013131. 1, CCG014280. 1, CCG006767. 1, CCG019296. 1, CCG013065. 1, CCG008871. 1, CCG014840. 1, CCG015694. 1, CCG014819. 1, CCG013865. 1, CCG018788. 1, CCG006484. 1, CCG010378. 2, CCG027114. 1, CCG026602. 1, CCG006344. 1, CCG026280. 1, CCG010510. 1, CCG021737. 1, CCG023468. 1, CCG000773. 1, CCG009119. 1, CCG015350. 1, CCG021948. 1, CCG011148. 1, CCG020651. 1, CCG000552. 1, CCG009805. 2, CCG002966. 1, CCG019545. 1, CCG003142. 1, CCG021137. 1, CCG019330. 1, CCG001876. 1, CCG000915. 1, CCG024200. 1, CCG023125. 1, CCG016381. 1, CCG011727. 1, CCG028426. 1, CCG027748. 1, CCG017001. 1, CCG000294. 1, CCG004926. 1, CCG016778. 1, CCG017381. 1, CCG015367. 1, CCG007336. 1, CCG007155. 1, CCG005501. 1, CCG007766. 1, CCG000368. 1, CCG004806. 1, CCG004534. 1, CCG003471. 1, CCG018164. 1, CCG004224. 1, CCG010112. 1, CCG019398. 1, CCG011135. 1, CCG006876. 1, CCG028092. 1, CCG027407. 4, CCG000209. 1, CCG026258. 1, CCG021521. 1, CCG007902. 1, CCG024232. 1, CCG023184. 1, CCG022209. 1, CCG021940. 1, CCG013174. 1, CCG014839. 1, CCG018168. 1, CCG014579. 1, CCG017344. 1, CCG019426. 1, CCG004332. 1, CCG025889. 1, CCG018796. 1, CCG025691. 1, CCG009394. 1, CCG027401. 1, |
| GO:0006826 | iron ion transport                 | 5 of 4104 in the list   | 17 of 8404 in the genome  | 1 | CCG000302. 1, CCG008826. 1, CCG009992. 1, CCG024590. 1, CCG020377. 1                                                                                                                                                                                                                                                                                                                                                                                                                                                                                                                                                                                                                                                                                                                                                                                                                                                                                                                                                                                                                                                                                                                                                                                                                                                                                                                                                                                                                                                                                                                                                                                                                                                                                                                                                                                                                                                                                              |
| GO:0009888 | tissue development                 | 5 of 4104 in the list   | 17 of 8404 in the genome  | 1 | CCG004753. 1, CCG015596. 1, CCG008075. 1, CCG015458. 1, CCG016035. 1                                                                                                                                                                                                                                                                                                                                                                                                                                                                                                                                                                                                                                                                                                                                                                                                                                                                                                                                                                                                                                                                                                                                                                                                                                                                                                                                                                                                                                                                                                                                                                                                                                                                                                                                                                                                                                                                                              |
| GO:0031099 | regeneration                       | 5 of 4104 in the list   | 17 of 8404 in the genome  | 1 | CCG004753. 1, CCG015596. 1, CCG008075. 1, CCG015458. 1, CCG016035. 1                                                                                                                                                                                                                                                                                                                                                                                                                                                                                                                                                                                                                                                                                                                                                                                                                                                                                                                                                                                                                                                                                                                                                                                                                                                                                                                                                                                                                                                                                                                                                                                                                                                                                                                                                                                                                                                                                              |

|            |                                     |                          |                            |   |                                                                                                                                                                                                                                                                                                                                                                                                                                                                                                                                                                                                                                                                                                                                                                                                                                                                                                                                                                                                                                                                                                                                                                                                                                                                                                                                                                                                                                                                                                                                                                                                                                                                                                                                                                                                                            |
|------------|-------------------------------------|--------------------------|----------------------------|---|----------------------------------------------------------------------------------------------------------------------------------------------------------------------------------------------------------------------------------------------------------------------------------------------------------------------------------------------------------------------------------------------------------------------------------------------------------------------------------------------------------------------------------------------------------------------------------------------------------------------------------------------------------------------------------------------------------------------------------------------------------------------------------------------------------------------------------------------------------------------------------------------------------------------------------------------------------------------------------------------------------------------------------------------------------------------------------------------------------------------------------------------------------------------------------------------------------------------------------------------------------------------------------------------------------------------------------------------------------------------------------------------------------------------------------------------------------------------------------------------------------------------------------------------------------------------------------------------------------------------------------------------------------------------------------------------------------------------------------------------------------------------------------------------------------------------------|
| GO:0042060 | wound healing                       | 5 of 4104 in the list    | 17 of 8404 in the genome   | 1 | CCG004753.1, CCG015596.1, CCG008075.1, CCG015458.1, CCG016035.1                                                                                                                                                                                                                                                                                                                                                                                                                                                                                                                                                                                                                                                                                                                                                                                                                                                                                                                                                                                                                                                                                                                                                                                                                                                                                                                                                                                                                                                                                                                                                                                                                                                                                                                                                            |
| GO:0042246 | tissue regeneration                 | 5 of 4104 in the list    | 17 of 8404 in the genome   | 1 | CCG004753.1, CCG015596.1, CCG008075.1, CCG015458.1, CCG016035.1                                                                                                                                                                                                                                                                                                                                                                                                                                                                                                                                                                                                                                                                                                                                                                                                                                                                                                                                                                                                                                                                                                                                                                                                                                                                                                                                                                                                                                                                                                                                                                                                                                                                                                                                                            |
| GO:0071704 | organic substance metabolic process | 2131 of 4104 in the list | 4451 of 8404 in the genome | 1 | CCG014531.2, CCG006922.1, CCG017420.1, CCG027068.1, CCG004122.1, CCG004887.1, CCG026106.1, CCG016952.1, CCG012875.1, CCG025108.1, CCG028016.1, CCG004468.1, CCG023989.1, CCG012726.1, CCG024584.1, CCG004020.1, CCG017266.1, CCG006875.2, CCG011763.1, CCG025208.1, CCG021479.1, CCG003362.1, CCG023381.1, CCG019382.1, CCG016094.1, CCG026413.3, CCG023474.1, CCG017255.1, CCG026871.2, CCG010792.1, CCG022025.2, CCG005053.1, CCG021616.1, CCG003767.1, CCG010905.1, CCG008270.1, CCG021110.1, CCG024612.1, CCG003624.1, CCG028653.1, CCG013109.1, CCG006465.1, CCG019571.1, CCG015694.1, CCG018788.1, CCG002982.1, CCG012083.1, CCG023686.1, CCG013641.1, CCG015350.1, CCG021948.1, CCG007467.1, CCG004927.1, CCG024903.1, CCG021137.1, CCG022056.1, CCG013610.1, CCG001876.1, CCG013465.1, CCG018688.1, CCG024200.1, CCG020663.1, CCG023458.1, CCG024865.1, CCG004926.1, CCG006928.1, CCG004532.1, CCG000789.1, CCG017381.1, CCG010912.1, CCG001704.1, CCG005524.1, CCG001289.1, CCG011547.1, CCG013640.1, CCG008404.1, CCG010136.1, CCG027015.1, CCG022370.1, CCG020803.1, CCG020179.1, CCG010112.1, CCG022513.2, CCG004986.1, CCG007750.2, CCG027989.1, CCG025707.1, CCG028092.1, CCG019831.2, CCG019825.2, CCG001395.1, CCG024155.1, CCG016557.1, CCG021990.1, CCG027000.1, CCG006804.1, CCG007814.1, CCG006264.1, CCG015896.1, CCG024760.1, CCG011015.1, CCG010865.1, CCG014222.1, CCG012959.1, CCG000612.1, CCG025897.1, CCG004308.1, CCG002466.1, CCG001440.1, CCG006921.1, CCG009928.1, CCG012666.1, CCG014982.1, CCG017894.1, CCG007724.1, CCG024070.1, CCG012229.1, CCG024679.1, CCG013298.1, CCG012843.1, CCG015312.2, CCG000490.1, CCG005269.1, CCG022674.1, CCG021250.1, CCG003940.1, CCG018211.1, CCG003657.2, CCG021641.1, CCG025552.1, CCG028648.1, CCG013199.1, CCG003981.1, CCG021354.1, CCG010174.2, |
| GO:0046834 | lipid phosphorylation               | 8 of 4104 in the list    | 25 of 8404 in the genome   | 1 | CCG000789.1, CCG024778.1, CCG019820.1, CCG023393.1, CCG012959.1, CCG015130.1, CCG011658.1, CCG024903.1                                                                                                                                                                                                                                                                                                                                                                                                                                                                                                                                                                                                                                                                                                                                                                                                                                                                                                                                                                                                                                                                                                                                                                                                                                                                                                                                                                                                                                                                                                                                                                                                                                                                                                                     |

|            |                                         |                         |                           |   |                                                                                                                                                                                                                                                                                                                                                                                                                                                                                                                                                                                                                                                                                                                                                                                                                                                                                                                                                                                                                                                                                                                                                                                                                                                                                                                                                                                                                                                                                                                                                                                                                                                                                                                                                                                                                                                                                                                                                                   |
|------------|-----------------------------------------|-------------------------|---------------------------|---|-------------------------------------------------------------------------------------------------------------------------------------------------------------------------------------------------------------------------------------------------------------------------------------------------------------------------------------------------------------------------------------------------------------------------------------------------------------------------------------------------------------------------------------------------------------------------------------------------------------------------------------------------------------------------------------------------------------------------------------------------------------------------------------------------------------------------------------------------------------------------------------------------------------------------------------------------------------------------------------------------------------------------------------------------------------------------------------------------------------------------------------------------------------------------------------------------------------------------------------------------------------------------------------------------------------------------------------------------------------------------------------------------------------------------------------------------------------------------------------------------------------------------------------------------------------------------------------------------------------------------------------------------------------------------------------------------------------------------------------------------------------------------------------------------------------------------------------------------------------------------------------------------------------------------------------------------------------------|
| GO:0046854 | phosphatidylinositol phosphorylation    | 8 of 4104 in the list   | 25 of 8404 in the genome  | 1 | CCG000789. 1, CCG024778. 1, CCG019820. 1, CCG023393. 1, CCG012959. 1, CCG015130. 1, CCG011658. 1, CCG024903. 1                                                                                                                                                                                                                                                                                                                                                                                                                                                                                                                                                                                                                                                                                                                                                                                                                                                                                                                                                                                                                                                                                                                                                                                                                                                                                                                                                                                                                                                                                                                                                                                                                                                                                                                                                                                                                                                    |
| GO:0006412 | translation                             | 150 of 4104 in the list | 343 of 8404 in the genome | 1 | CCG014531. 2, CCG023277. 1, CCG014396. 1, CCG004807. 1, CCG010191. 3, CCG013430. 1, CCG021944. 1, CCG009878. 1, CCG003437. 1, CCG004909. 1, CCG015950. 3, CCG026048. 1, CCG002354. 1, CCG016238. 1, CCG007396. 1, CCG026825. 1, CCG016378. 1, CCG003573. 1, CCG025223. 1, CCG027607. 1, CCG007854. 1, CCG008753. 1, CCG019944. 1, CCG026871. 2, CCG018719. 1, CCG008270. 1, CCG008592. 1, CCG000414. 1, CCG005737. 1, CCG011972. 1, CCG020877. 1, CCG009249. 1, CCG006231. 1, CCG008321. 1, CCG014896. 1, CCG001863. 1, CCG002890. 1, CCG022229. 1, CCG008871. 1, CCG007059. 1, CCG014819. 1, CCG018788. 1, CCG005204. 1, CCG026602. 1, CCG006344. 1, CCG027913. 1, CCG026280. 1, CCG016285. 1, CCG003684. 1, CCG021737. 1, CCG000773. 1, CCG023315. 1, CCG005622. 1, CCG002966. 1, CCG019545. 1, CCG019330. 1, CCG001876. 1, CCG000915. 1, CCG026570. 1, CCG001013. 1, CCG011256. 1, CCG026155. 1, CCG027748. 1, CCG007047. 1, CCG000294. 1, CCG016778. 1, CCG021774. 1, CCG008569. 1, CCG015367. 1, CCG027724. 1, CCG007256. 1, CCG000368. 1, CCG006188. 1, CCG004104. 1, CCG027352. 3, CCG003471. 1, CCG018164. 1, CCG016139. 1, CCG010112. 1, CCG011135. 1, CCG019398. 1, CCG013727. 1, CCG028092. 1, CCG006876. 1, CCG021521. 1, CCG024781. 1, CCG005143. 1, CCG021940. 1, CCG009349. 1, CCG003809. 1, CCG010321. 1, CCG011345. 1, CCG018168. 1, CCG019426. 1, CCG000138. 1, CCG017344. 1, CCG008581. 1, CCG009394. 1, CCG015577. 3, CCG002544. 1, CCG002644. 1, CCG024813. 1, CCG016699. 1, CCG002018. 1, CCG002680. 1, CCG006336. 1, CCG013870. 1, CCG014051. 1, CCG005443. 1, CCG001811. 1, CCG021917. 1, CCG004949. 1, CCG005442. 1, CCG027751. 1, CCG003710. 1, CCG027281. 1, CCG013833. 1, CCG020899. 1, CCG002408. 1, CCG021716. 1, CCG014947. 2, CCG007705. 1, CCG021820. 1, CCG020268. 1, CCG002238. 1, CCG017334. 1, CCG000994. 1, CCG006570. 1, CCG002662. 1, CCG016511. 1, CCG000352. 1, CCG025107. 1, CCG021933. 1, CCG003528. 1, CCG025409. 1, |
| GO:0051493 | regulation of cytoskeleton organization | 2 of 4104 in the list   | 9 of 8404 in the genome   | 1 | CCG025026. 1, CCG019102. 1                                                                                                                                                                                                                                                                                                                                                                                                                                                                                                                                                                                                                                                                                                                                                                                                                                                                                                                                                                                                                                                                                                                                                                                                                                                                                                                                                                                                                                                                                                                                                                                                                                                                                                                                                                                                                                                                                                                                        |
| GO:0072657 | protein localization to membrane        | 7 of 4104 in the list   | 23 of 8404 in the genome  | 1 | CCG027323. 1, CCG006714. 1, CCG018217. 1, CCG000614. 1, CCG007941. 1, CCG020949. 1, CCG020806. 1                                                                                                                                                                                                                                                                                                                                                                                                                                                                                                                                                                                                                                                                                                                                                                                                                                                                                                                                                                                                                                                                                                                                                                                                                                                                                                                                                                                                                                                                                                                                                                                                                                                                                                                                                                                                                                                                  |

|            |                                                   |                         |                           |   |                                                                                                                                                                                                                                                                                                                                                                                                                                                                                                                                                                                                                                                                                                                                                                                                                                                                                                                                                                                                                                                                                                                                                                                                                                                                                                                                                                                                                                                                                                                                                                                                                                                                                                                                                                                                                                                                                                                                                                   |
|------------|---------------------------------------------------|-------------------------|---------------------------|---|-------------------------------------------------------------------------------------------------------------------------------------------------------------------------------------------------------------------------------------------------------------------------------------------------------------------------------------------------------------------------------------------------------------------------------------------------------------------------------------------------------------------------------------------------------------------------------------------------------------------------------------------------------------------------------------------------------------------------------------------------------------------------------------------------------------------------------------------------------------------------------------------------------------------------------------------------------------------------------------------------------------------------------------------------------------------------------------------------------------------------------------------------------------------------------------------------------------------------------------------------------------------------------------------------------------------------------------------------------------------------------------------------------------------------------------------------------------------------------------------------------------------------------------------------------------------------------------------------------------------------------------------------------------------------------------------------------------------------------------------------------------------------------------------------------------------------------------------------------------------------------------------------------------------------------------------------------------------|
| GO:0090150 | establishment of protein localization to membrane | 7 of 4104 in the list   | 23 of 8404 in the genome  | 1 | CCG027323. 1, CCG006714. 1, CCG018217. 1, CCG000614. 1, CCG007941. 1, CCG020949. 1, CCG020806. 1                                                                                                                                                                                                                                                                                                                                                                                                                                                                                                                                                                                                                                                                                                                                                                                                                                                                                                                                                                                                                                                                                                                                                                                                                                                                                                                                                                                                                                                                                                                                                                                                                                                                                                                                                                                                                                                                  |
| GO:0034645 | cellular macromolecule biosynthetic process       | 364 of 4104 in the list | 800 of 8404 in the genome | 1 | CCG014531. 2, CCG018536. 1, CCG023277. 1, CCG014396. 1, CCG006549. 1, CCG004807. 1, CCG010191. 3, CCG013430. 1, CCG009878. 1, CCG010647. 1, CCG026882. 1, CCG018507. 1, CCG002354. 1, CCG004468. 1, CCG016238. 1, CCG026473. 1, CCG004091. 1, CCG001292. 1, CCG018321. 1, CCG026825. 1, CCG002470. 1, CCG003573. 1, CCG028505. 1, CCG025472. 1, CCG025223. 1, CCG018432. 1, CCG015599. 1, CCG004398. 1, CCG025208. 1, CCG012213. 2, CCG026871. 2, CCG018719. 1, CCG013353. 1, CCG012623. 1, CCG008270. 1, CCG019210. 1, CCG027115. 1, CCG018799. 1, CCG020129. 1, CCG024612. 1, CCG005737. 1, CCG005276. 1, CCG024326. 1, CCG020877. 1, CCG021295. 1, CCG009249. 1, CCG006231. 1, CCG020286. 1, CCG014896. 1, CCG001863. 1, CCG013131. 1, CCG014280. 1, CCG006767. 1, CCG019296. 1, CCG013065. 1, CCG008871. 1, CCG014840. 1, CCG015694. 1, CCG014819. 1, CCG013865. 1, CCG018788. 1, CCG006484. 1, CCG010378. 2, CCG027114. 1, CCG026602. 1, CCG006344. 1, CCG026280. 1, CCG010510. 1, CCG021737. 1, CCG023468. 1, CCG000773. 1, CCG009119. 1, CCG015350. 1, CCG021948. 1, CCG011148. 1, CCG020651. 1, CCG000552. 1, CCG009805. 2, CCG002966. 1, CCG019545. 1, CCG003142. 1, CCG021137. 1, CCG019330. 1, CCG001876. 1, CCG000915. 1, CCG024200. 1, CCG023125. 1, CCG016381. 1, CCG011727. 1, CCG028426. 1, CCG027748. 1, CCG017001. 1, CCG000294. 1, CCG004926. 1, CCG016778. 1, CCG017381. 1, CCG015367. 1, CCG007336. 1, CCG007155. 1, CCG005501. 1, CCG007766. 1, CCG000368. 1, CCG004806. 1, CCG004534. 1, CCG003471. 1, CCG018164. 1, CCG004224. 1, CCG010112. 1, CCG019398. 1, CCG011135. 1, CCG006876. 1, CCG028092. 1, CCG027407. 4, CCG000209. 1, CCG026258. 1, CCG021521. 1, CCG007902. 1, CCG024232. 1, CCG023184. 1, CCG022209. 1, CCG021940. 1, CCG013174. 1, CCG014839. 1, CCG018168. 1, CCG014579. 1, CCG017344. 1, CCG019426. 1, CCG004332. 1, CCG025889. 1, CCG018796. 1, CCG025691. 1, CCG009394. 1, CCG027401. 1, CCG002644. 1, CCG024760. 1, |

|            |                                       |                         |                            |   |                                                                                                                                                                                                                                                                                                                                                                                                                                                                                                                                                                                                                                                                                                                                                                                                                                                                                                                                                                                                                                                                                                                                                                                                                                                                                                                                                                                                                                                                                                                                                                                                                                                                                                                                                                                                                                                                                                                                                                   |
|------------|---------------------------------------|-------------------------|----------------------------|---|-------------------------------------------------------------------------------------------------------------------------------------------------------------------------------------------------------------------------------------------------------------------------------------------------------------------------------------------------------------------------------------------------------------------------------------------------------------------------------------------------------------------------------------------------------------------------------------------------------------------------------------------------------------------------------------------------------------------------------------------------------------------------------------------------------------------------------------------------------------------------------------------------------------------------------------------------------------------------------------------------------------------------------------------------------------------------------------------------------------------------------------------------------------------------------------------------------------------------------------------------------------------------------------------------------------------------------------------------------------------------------------------------------------------------------------------------------------------------------------------------------------------------------------------------------------------------------------------------------------------------------------------------------------------------------------------------------------------------------------------------------------------------------------------------------------------------------------------------------------------------------------------------------------------------------------------------------------------|
| GO:0019538 | protein metabolic process             | 957 of 4104 in the list | 2040 of 8404 in the genome | 1 | CCG011990. 4, CCG014531. 2, CCG006922. 1, CCG027068. 1, CCG014396. 1, CCG004887. 1, CCG006912. 1, CCG013430. 1, CCG009878. 1, CCG002687. 2, CCG016952. 1, CCG028016. 1, CCG026174. 1, CCG016238. 1, CCG012726. 1, CCG019308. 1, CCG025472. 1, CCG018432. 1, CCG017266. 1, CCG006875. 2, CCG028198. 1, CCG016689. 2, CCG021479. 1, CCG003362. 1, CCG026300. 1, CCG002634. 1, CCG023381. 1, CCG019735. 1, CCG017289. 1, CCG026413. 3, CCG016271. 1, CCG026871. 2, CCG012077. 1, CCG008381. 1, CCG021616. 1, CCG016336. 1, CCG026069. 1, CCG025069. 2, CCG003767. 1, CCG005738. 1, CCG013876. 1, CCG008270. 1, CCG024294. 1, CCG008301. 1, CCG017984. 1, CCG024612. 1, CCG005737. 1, CCG027636. 1, CCG003624. 1, CCG026212. 1, CCG004569. 1, CCG024139. 1, CCG008040. 1, CCG002156. 2, CCG013109. 1, CCG020562. 1, CCG011238. 1, CCG011949. 1, CCG005125. 1, CCG006465. 1, CCG015074. 1, CCG027940. 1, CCG004212. 1, CCG003248. 1, CCG019571. 1, CCG008871. 1, CCG004331. 1, CCG018788. 1, CCG018494. 1, CCG002982. 1, CCG012083. 1, CCG001311. 1, CCG026602. 1, CCG006344. 1, CCG016480. 1, CCG022996. 1, CCG022627. 1, CCG001214. 1, CCG007457. 1, CCG021737. 1, CCG012332. 1, CCG026384. 1, CCG022225. 1, CCG028590. 1, CCG002957. 1, CCG024897. 1, CCG017570. 1, CCG018585. 3, CCG007467. 1, CCG008341. 1, CCG014385. 1, CCG003203. 1, CCG000552. 1, CCG013119. 1, CCG022994. 1, CCG005089. 1, CCG002966. 1, CCG019545. 1, CCG022056. 1, CCG001876. 1, CCG007823. 1, CCG015186. 1, CCG012023. 1, CCG016327. 2, CCG018688. 1, CCG003608. 1, CCG012957. 1, CCG023502. 1, CCG023458. 1, CCG027748. 1, CCG027943. 1, CCG006666. 1, CCG000294. 1, CCG003520. 1, CCG024865. 1, CCG006928. 1, CCG016738. 2, CCG017381. 1, CCG003554. 1, CCG018968. 1, CCG007874. 3, CCG001704. 1, CCG027993. 1, CCG015367. 1, CCG001289. 1, CCG013640. 1, CCG008404. 1, CCG008099. 1, CCG018201. 1, CCG005501. 1, CCG007766. 1, CCG006174. 1, CCG021179. 1, CCG001108. 1, CCG009574. 1, |
| GO:0044802 | single-organism membrane organization | 9 of 4104 in the list   | 29 of 8404 in the genome   | 1 | CCG027323. 1, CCG000614. 1, CCG007941. 1, CCG026620. 1, CCG006714. 1, CCG020315. 1, CCG018217. 1, CCG020949. 1, CCG020806. 1                                                                                                                                                                                                                                                                                                                                                                                                                                                                                                                                                                                                                                                                                                                                                                                                                                                                                                                                                                                                                                                                                                                                                                                                                                                                                                                                                                                                                                                                                                                                                                                                                                                                                                                                                                                                                                      |
| GO:0061024 | membrane organization                 | 9 of 4104 in the list   | 29 of 8404 in the genome   | 1 | CCG027323. 1, CCG000614. 1, CCG007941. 1, CCG026620. 1, CCG006714. 1, CCG020315. 1, CCG018217. 1, CCG020949. 1, CCG020806. 1                                                                                                                                                                                                                                                                                                                                                                                                                                                                                                                                                                                                                                                                                                                                                                                                                                                                                                                                                                                                                                                                                                                                                                                                                                                                                                                                                                                                                                                                                                                                                                                                                                                                                                                                                                                                                                      |

|            |                                               |                        |                           |   |                                                                                                                                                                                                                                                                                                                                                                                                                                                                                                                                                                                                                                                                                                                                          |
|------------|-----------------------------------------------|------------------------|---------------------------|---|------------------------------------------------------------------------------------------------------------------------------------------------------------------------------------------------------------------------------------------------------------------------------------------------------------------------------------------------------------------------------------------------------------------------------------------------------------------------------------------------------------------------------------------------------------------------------------------------------------------------------------------------------------------------------------------------------------------------------------------|
| GO:0072330 | monocarboxylic acid biosynthetic process      | 12 of 4104 in the list | 37 of 8404 in the genome  | 1 | CCG015276. 2, CCG003865. 1, CCG026331. 1, CCG009244. 1, CCG017097. 1, CCG012408. 1, CCG020559. 1, CCG003751. 1, CCG016315. 1, CCG027312. 1, CCG019909. 1, CCG018615. 3                                                                                                                                                                                                                                                                                                                                                                                                                                                                                                                                                                   |
| GO:1902582 | single-organism intracellular transport       | 32 of 4104 in the list | 85 of 8404 in the genome  | 1 | CCG011766. 1, CCG018832. 1, CCG001809. 1, CCG026620. 1, CCG027564. 1, CCG017209. 1, CCG015800. 2, CCG018217. 1, CCG013042. 1, CCG004573. 1, CCG020949. 1, CCG012550. 1, CCG022771. 1, CCG028498. 1, CCG023814. 2, CCG020315. 1, CCG019797. 1, CCG015087. 1, CCG017077. 1, CCG000010. 1, CCG002766. 1, CCG000614. 1, CCG017078. 1, CCG011696. 1, CCG022927. 1, CCG020806. 1, CCG007989. 1, CCG026989. 1, CCG011862. 1, CCG006714. 1, CCG010178. 1, CCG017874. 1                                                                                                                                                                                                                                                                           |
| GO:0033365 | protein localization to organelle             | 16 of 4104 in the list | 47 of 8404 in the genome  | 1 | CCG018832. 1, CCG000614. 1, CCG017078. 1, CCG001809. 1, CCG011696. 1, CCG018217. 1, CCG004573. 1, CCG020949. 1, CCG020806. 1, CCG022771. 1, CCG012550. 1, CCG028498. 1, CCG006714. 1, CCG019797. 1, CCG017077. 1, CCG010178. 1                                                                                                                                                                                                                                                                                                                                                                                                                                                                                                           |
| GO:0070972 | protein localization to endoplasmic reticulum | 4 of 4104 in the list  | 16 of 8404 in the genome  | 1 | CCG006714. 1, CCG018217. 1, CCG000614. 1, CCG020806. 1                                                                                                                                                                                                                                                                                                                                                                                                                                                                                                                                                                                                                                                                                   |
| GO:0030163 | protein catabolic process                     | 51 of 4104 in the list | 129 of 8404 in the genome | 1 | CCG005241. 1, CCG003060. 1, CCG008217. 1, CCG027068. 1, CCG001704. 1, CCG007080. 1, CCG019394. 1, CCG001350. 1, CCG010600. 1, CCG011238. 1, CCG007937. 2, CCG019571. 1, CCG019599. 1, CCG010879. 1, CCG001877. 1, CCG012628. 1, CCG003288. 1, CCG004331. 1, CCG028137. 1, CCG008969. 2, CCG022635. 1, CCG013832. 1, CCG012164. 1, CCG009737. 1, CCG002938. 1, CCG024679. 1, CCG012828. 1, CCG021825. 3, CCG001101. 1, CCG013093. 1, CCG027000. 1, CCG003809. 1, CCG001769. 1, CCG027283. 1, CCG003858. 1, CCG026413. 3, CCG026999. 1, CCG028595. 1, CCG005441. 1, CCG023684. 1, CCG022742. 2, CCG002974. 1, CCG014222. 1, CCG013876. 1, CCG027945. 1, CCG023270. 1, CCG027763. 1, CCG001217. 1, CCG014393. 1, CCG004134. 1, CCG019932. 1 |
| GO:0006897 | endocytosis                                   | 2 of 4104 in the list  | 10 of 8404 in the genome  | 1 | CCG007283. 1, CCG021800. 1                                                                                                                                                                                                                                                                                                                                                                                                                                                                                                                                                                                                                                                                                                               |
| GO:0048589 | developmental growth                          | 5 of 4104 in the list  | 19 of 8404 in the genome  | 1 | CCG004753. 1, CCG015596. 1, CCG008075. 1, CCG015458. 1, CCG016035. 1                                                                                                                                                                                                                                                                                                                                                                                                                                                                                                                                                                                                                                                                     |

|            |                                                            |                        |                           |   |                                                                                                                                                                                                                                                                                                                                                                                                                                                                                                                                                                                                                                                                                                                            |
|------------|------------------------------------------------------------|------------------------|---------------------------|---|----------------------------------------------------------------------------------------------------------------------------------------------------------------------------------------------------------------------------------------------------------------------------------------------------------------------------------------------------------------------------------------------------------------------------------------------------------------------------------------------------------------------------------------------------------------------------------------------------------------------------------------------------------------------------------------------------------------------------|
| GO:0044257 | cellular protein catabolic process                         | 50 of 4104 in the list | 128 of 8404 in the genome | 1 | CCG005241. 1, CCG003060. 1, CCG008217. 1, CCG027068. 1, CCG001704. 1, CCG007080. 1, CCG019394. 1, CCG001350. 1, CCG010600. 1, CCG011238. 1, CCG007937. 2, CCG019571. 1, CCG019599. 1, CCG010879. 1, CCG001877. 1, CCG012628. 1, CCG003288. 1, CCG004331. 1, CCG028137. 1, CCG008969. 2, CCG022635. 1, CCG013832. 1, CCG009737. 1, CCG002938. 1, CCG024679. 1, CCG012828. 1, CCG021825. 3, CCG001101. 1, CCG013093. 1, CCG027000. 1, CCG003809. 1, CCG001769. 1, CCG027283. 1, CCG003858. 1, CCG026413. 3, CCG026999. 1, CCG028595. 1, CCG005441. 1, CCG023684. 1, CCG022742. 2, CCG002974. 1, CCG014222. 1, CCG013876. 1, CCG027945. 1, CCG023270. 1, CCG027763. 1, CCG001217. 1, CCG014393. 1, CCG004134. 1, CCG019932. 1 |
| GO:0051603 | proteolysis involved in cellular protein catabolic process | 50 of 4104 in the list | 128 of 8404 in the genome | 1 | CCG005241. 1, CCG003060. 1, CCG008217. 1, CCG027068. 1, CCG001704. 1, CCG007080. 1, CCG019394. 1, CCG001350. 1, CCG010600. 1, CCG011238. 1, CCG007937. 2, CCG019571. 1, CCG019599. 1, CCG010879. 1, CCG001877. 1, CCG012628. 1, CCG003288. 1, CCG004331. 1, CCG028137. 1, CCG008969. 2, CCG022635. 1, CCG013832. 1, CCG009737. 1, CCG002938. 1, CCG024679. 1, CCG012828. 1, CCG021825. 3, CCG001101. 1, CCG013093. 1, CCG027000. 1, CCG003809. 1, CCG001769. 1, CCG027283. 1, CCG003858. 1, CCG026413. 3, CCG026999. 1, CCG028595. 1, CCG005441. 1, CCG023684. 1, CCG022742. 2, CCG002974. 1, CCG014222. 1, CCG013876. 1, CCG027945. 1, CCG023270. 1, CCG027763. 1, CCG001217. 1, CCG014393. 1, CCG004134. 1, CCG019932. 1 |
| GO:0000041 | transition metal ion transport                             | 7 of 4104 in the list  | 25 of 8404 in the genome  | 1 | CCG000302. 1, CCG003878. 1, CCG000927. 1, CCG008826. 1, CCG009992. 1, CCG024590. 1, CCG020377. 1                                                                                                                                                                                                                                                                                                                                                                                                                                                                                                                                                                                                                           |

|            |                                       |                         |                           |   |                                                                                                                                                                                                                                                                                                                                                                                                                                                                                                                                                                                                                                                                                                                                                                                                                                                                                                                                                                                                                                                                                                                                                                                                                                                                                                                                                                                                                                                                                                                                                                                                                                                                                                                                                                                                        |
|------------|---------------------------------------|-------------------------|---------------------------|---|--------------------------------------------------------------------------------------------------------------------------------------------------------------------------------------------------------------------------------------------------------------------------------------------------------------------------------------------------------------------------------------------------------------------------------------------------------------------------------------------------------------------------------------------------------------------------------------------------------------------------------------------------------------------------------------------------------------------------------------------------------------------------------------------------------------------------------------------------------------------------------------------------------------------------------------------------------------------------------------------------------------------------------------------------------------------------------------------------------------------------------------------------------------------------------------------------------------------------------------------------------------------------------------------------------------------------------------------------------------------------------------------------------------------------------------------------------------------------------------------------------------------------------------------------------------------------------------------------------------------------------------------------------------------------------------------------------------------------------------------------------------------------------------------------------|
| GO:0045184 | establishment of protein localization | 124 of 4104 in the list | 293 of 8404 in the genome | 1 | CCG026698. 1, CCG011766. 1, CCG017420. 1, CCG018832. 1, CCG002549. 1, CCG003146. 1, CCG011408. 1, CCG027762. 1, CCG007060. 1, CCG001809. 1, CCG023877. 1, CCG028124. 1, CCG019590. 1, CCG027692. 1, CCG020949. 1, CCG004026. 1, CCG003995. 1, CCG015386. 1, CCG017612. 1, CCG019020. 1, CCG012550. 1, CCG002645. 1, CCG016347. 1, CCG009428. 1, CCG018800. 1, CCG017725. 1, CCG007941. 1, CCG024905. 1, CCG011813. 1, CCG005262. 1, CCG020315. 1, CCG015568. 1, CCG009607. 1, CCG011006. 1, CCG017077. 1, CCG000010. 1, CCG002766. 1, CCG007827. 1, CCG014434. 1, CCG000614. 1, CCG003531. 1, CCG025027. 1, CCG017078. 1, CCG003334. 1, CCG011696. 1, CCG014307. 1, CCG027457. 1, CCG019103. 1, CCG019629. 2, CCG002917. 1, CCG027257. 1, CCG010939. 1, CCG007855. 1, CCG007283. 1, CCG002374. 1, CCG016541. 1, CCG020909. 1, CCG018447. 1, CCG003786. 1, CCG016966. 1, CCG006714. 1, CCG027473. 1, CCG010178. 1, CCG006777. 1, CCG013984. 1, CCG001673. 1, CCG001172. 1, CCG020280. 1, CCG020929. 1, CCG014506. 1, CCG018557. 1, CCG016493. 2, CCG026744. 1, CCG026620. 1, CCG027564. 1, CCG015800. 2, CCG018217. 1, CCG006625. 1, CCG003775. 1, CCG004573. 1, CCG016831. 1, CCG004869. 1, CCG022771. 1, CCG022910. 1, CCG023595. 1, CCG017373. 1, CCG026953. 1, CCG006924. 1, CCG021220. 1, CCG028498. 1, CCG005427. 1, CCG019797. 1, CCG006775. 1, CCG015087. 1, CCG017591. 1, CCG017137. 1, CCG013126. 2, CCG027323. 1, CCG013641. 1, CCG025233. 1, CCG016027. 1, CCG008312. 1, CCG003495. 1, CCG021411. 1, CCG001859. 1, CCG021377. 1, CCG027241. 1, CCG026336. 1, CCG005195. 1, CCG021800. 1, CCG016542. 1, CCG014226. 1, CCG009362. 1, CCG015654. 1, CCG020806. 1, CCG020634. 1, CCG010567. 3, CCG025473. 1, CCG026947. 1, CCG023756. 1, CCG021152. 1, CCG001481. 1, CCG017125. 1, CCG023526. 2 |
|------------|---------------------------------------|-------------------------|---------------------------|---|--------------------------------------------------------------------------------------------------------------------------------------------------------------------------------------------------------------------------------------------------------------------------------------------------------------------------------------------------------------------------------------------------------------------------------------------------------------------------------------------------------------------------------------------------------------------------------------------------------------------------------------------------------------------------------------------------------------------------------------------------------------------------------------------------------------------------------------------------------------------------------------------------------------------------------------------------------------------------------------------------------------------------------------------------------------------------------------------------------------------------------------------------------------------------------------------------------------------------------------------------------------------------------------------------------------------------------------------------------------------------------------------------------------------------------------------------------------------------------------------------------------------------------------------------------------------------------------------------------------------------------------------------------------------------------------------------------------------------------------------------------------------------------------------------------|



|            |                                       |                         |                           |   |                                                                                                                                                                                                                                                                                                                                                                                                                                                                                                                                                                                                                                                                                                                                                                                                                                                                                                                                                                                                                                                                                                                                                                                                                                                                                                                                                                                                                                                                                                                                                                                                                                                                                                                                                                             |
|------------|---------------------------------------|-------------------------|---------------------------|---|-----------------------------------------------------------------------------------------------------------------------------------------------------------------------------------------------------------------------------------------------------------------------------------------------------------------------------------------------------------------------------------------------------------------------------------------------------------------------------------------------------------------------------------------------------------------------------------------------------------------------------------------------------------------------------------------------------------------------------------------------------------------------------------------------------------------------------------------------------------------------------------------------------------------------------------------------------------------------------------------------------------------------------------------------------------------------------------------------------------------------------------------------------------------------------------------------------------------------------------------------------------------------------------------------------------------------------------------------------------------------------------------------------------------------------------------------------------------------------------------------------------------------------------------------------------------------------------------------------------------------------------------------------------------------------------------------------------------------------------------------------------------------------|
| GO:0015031 | protein transport                     | 122 of 4104 in the list | 289 of 8404 in the genome | 1 | CCG026698. 1, CCG011766. 1, CCG017420. 1, CCG018832. 1, CCG002549. 1, CCG003146. 1, CCG011408. 1, CCG027762. 1, CCG007060. 1, CCG001809. 1, CCG023877. 1, CCG028124. 1, CCG019590. 1, CCG027692. 1, CCG020949. 1, CCG004026. 1, CCG003995. 1, CCG015386. 1, CCG017612. 1, CCG019020. 1, CCG012550. 1, CCG002645. 1, CCG016347. 1, CCG009428. 1, CCG018800. 1, CCG017725. 1, CCG024905. 1, CCG011813. 1, CCG005262. 1, CCG020315. 1, CCG015568. 1, CCG009607. 1, CCG011006. 1, CCG017077. 1, CCG000010. 1, CCG002766. 1, CCG007827. 1, CCG014434. 1, CCG0000614. 1, CCG003531. 1, CCG025027. 1, CCG017078. 1, CCG003334. 1, CCG011696. 1, CCG014307. 1, CCG027457. 1, CCG019103. 1, CCG019629. 2, CCG002917. 1, CCG027257. 1, CCG010939. 1, CCG007855. 1, CCG007283. 1, CCG002374. 1, CCG016541. 1, CCG020909. 1, CCG018447. 1, CCG003786. 1, CCG016966. 1, CCG006714. 1, CCG027473. 1, CCG010178. 1, CCG006777. 1, CCG013984. 1, CCG001673. 1, CCG001172. 1, CCG020280. 1, CCG020929. 1, CCG014506. 1, CCG018557. 1, CCG016493. 2, CCG026744. 1, CCG026620. 1, CCG027564. 1, CCG015800. 2, CCG018217. 1, CCG006625. 1, CCG003775. 1, CCG004573. 1, CCG016831. 1, CCG004869. 1, CCG022771. 1, CCG022910. 1, CCG023595. 1, CCG017373. 1, CCG026953. 1, CCG006924. 1, CCG021220. 1, CCG028498. 1, CCG005427. 1, CCG019797. 1, CCG006775. 1, CCG015087. 1, CCG017591. 1, CCG017137. 1, CCG013126. 2, CCG013641. 1, CCG025233. 1, CCG016027. 1, CCG008312. 1, CCG003495. 1, CCG021411. 1, CCG001859. 1, CCG021377. 1, CCG027241. 1, CCG026336. 1, CCG005195. 1, CCG021800. 1, CCG016542. 1, CCG014226. 1, CCG009362. 1, CCG015654. 1, CCG020806. 1, CCG020634. 1, CCG010567. 3, CCG025473. 1, CCG026947. 1, CCG023756. 1, CCG021152. 1, CCG001481. 1, CCG017125. 1, CCG023526. 2 |
| GO:0006839 | mitochondrial transport               | 2 of 4104 in the list   | 11 of 8404 in the genome  | 1 | CCG020949. 1, CCG023814. 2                                                                                                                                                                                                                                                                                                                                                                                                                                                                                                                                                                                                                                                                                                                                                                                                                                                                                                                                                                                                                                                                                                                                                                                                                                                                                                                                                                                                                                                                                                                                                                                                                                                                                                                                                  |
| GO:0016485 | protein processing                    | 2 of 4104 in the list   | 11 of 8404 in the genome  | 1 | CCG020032. 1, CCG003192. 1                                                                                                                                                                                                                                                                                                                                                                                                                                                                                                                                                                                                                                                                                                                                                                                                                                                                                                                                                                                                                                                                                                                                                                                                                                                                                                                                                                                                                                                                                                                                                                                                                                                                                                                                                  |
| GO:0051604 | protein maturation                    | 2 of 4104 in the list   | 11 of 8404 in the genome  | 1 | CCG020032. 1, CCG003192. 1                                                                                                                                                                                                                                                                                                                                                                                                                                                                                                                                                                                                                                                                                                                                                                                                                                                                                                                                                                                                                                                                                                                                                                                                                                                                                                                                                                                                                                                                                                                                                                                                                                                                                                                                                  |
| GO:1902578 | single-organism localization          | 10 of 4104 in the list  | 34 of 8404 in the genome  | 1 | CCG027323. 1, CCG018832. 1, CCG0000614. 1, CCG007941. 1, CCG006714. 1, CCG019797. 1, CCG018217. 1, CCG010178. 1, CCG020949. 1, CCG020806. 1                                                                                                                                                                                                                                                                                                                                                                                                                                                                                                                                                                                                                                                                                                                                                                                                                                                                                                                                                                                                                                                                                                                                                                                                                                                                                                                                                                                                                                                                                                                                                                                                                                 |
| GO:1902580 | single-organism cellular localization | 10 of 4104 in the list  | 34 of 8404 in the genome  | 1 | CCG027323. 1, CCG018832. 1, CCG0000614. 1, CCG007941. 1, CCG006714. 1, CCG019797. 1, CCG018217. 1, CCG010178. 1, CCG020949. 1, CCG020806. 1                                                                                                                                                                                                                                                                                                                                                                                                                                                                                                                                                                                                                                                                                                                                                                                                                                                                                                                                                                                                                                                                                                                                                                                                                                                                                                                                                                                                                                                                                                                                                                                                                                 |

|            |                         |                         |                           |   |                                                                                                                                                                                                                                                                                                                                                                                                                                                                                                                                                                                                                                                                                                                                                                                                                                                                                                                                                                                                                                                                                                                                                                                                                                                                                                                                                                                                                                                                                                                                                                                                                                                                                                                                                                                                                                   |
|------------|-------------------------|-------------------------|---------------------------|---|-----------------------------------------------------------------------------------------------------------------------------------------------------------------------------------------------------------------------------------------------------------------------------------------------------------------------------------------------------------------------------------------------------------------------------------------------------------------------------------------------------------------------------------------------------------------------------------------------------------------------------------------------------------------------------------------------------------------------------------------------------------------------------------------------------------------------------------------------------------------------------------------------------------------------------------------------------------------------------------------------------------------------------------------------------------------------------------------------------------------------------------------------------------------------------------------------------------------------------------------------------------------------------------------------------------------------------------------------------------------------------------------------------------------------------------------------------------------------------------------------------------------------------------------------------------------------------------------------------------------------------------------------------------------------------------------------------------------------------------------------------------------------------------------------------------------------------------|
| GO:0006629 | lipid metabolic process | 126 of 4104 in the list | 301 of 8404 in the genome | 1 | CCG004532. 1, CCG010367. 1, CCG000789. 1, CCG020241. 1, CCG009157. 1, CCG019820. 1, CCG009504. 1, CCG008603. 1, CCG017935. 1, CCG000663. 1, CCG004083. 1, CCG008690. 1, CCG000349. 1, CCG004806. 1, CCG014925. 1, CCG000591. 1, CCG020242. 1, CCG018048. 1, CCG021029. 1, CCG024092. 1, CCG021640. 1, CCG012875. 1, CCG007330. 1, CCG016997. 1, CCG006391. 1, CCG009159. 1, CCG025600. 1, CCG017097. 1, CCG015130. 1, CCG025387. 1, CCG011531. 1, CCG001102. 1, CCG005923. 1, CCG020420. 1, CCG024155. 1, CCG021030. 1, CCG011763. 1, CCG019263. 1, CCG005616. 1, CCG028180. 2, CCG022209. 1, CCG024778. 1, CCG015949. 1, CCG009434. 1, CCG014839. 1, CCG001894. 1, CCG023285. 1, CCG025521. 1, CCG012308. 1, CCG022134. 1, CCG017255. 1, CCG016653. 1, CCG003801. 1, CCG011658. 1, CCG025889. 1, CCG024760. 1, CCG018615. 3, CCG008910. 1, CCG028332. 1, CCG023779. 1, CCG012959. 1, CCG006965. 1, CCG010246. 1, CCG026559. 1, CCG003751. 1, CCG024612. 1, CCG001497. 1, CCG01909. 1, CCG025477. 1, CCG000346. 1, CCG004106. 1, CCG021085. 1, CCG009244. 1, CCG014647. 1, CCG023393. 1, CCG008281. 1, CCG001012. 1, CCG013509. 1, CCG012002. 1, CCG013131. 1, CCG012408. 1, CCG023284. 1, CCG026370. 1, CCG015351. 1, CCG011850. 1, CCG013805. 1, CCG014364. 1, CCG022352. 1, CCG001433. 1, CCG003249. 1, CCG000673. 1, CCG024453. 1, CCG019082. 1, CCG008479. 1, CCG025476. 1, CCG020243. 1, CCG021378. 1, CCG021610. 1, CCG027312. 1, CCG001665. 1, CCG023102. 1, CCG005542. 1, CCG009158. 1, CCG025233. 1, CCG017241. 1, CCG000402. 1, CCG011183. 1, CCG019857. 1, CCG006213. 1, CCG000552. 1, CCG017257. 1, CCG024903. 1, CCG024095. 1, CCG017994. 1, CCG023757. 1, CCG017100. 1, CCG019035. 1, CCG015411. 1, CCG015213. 1, CCG023643. 1, CCG025552. 1, CCG018851. 1, CCG014174. 1, CCG019697. 2, CCG026695. 1, CCG020408. 1 |
|------------|-------------------------|-------------------------|---------------------------|---|-----------------------------------------------------------------------------------------------------------------------------------------------------------------------------------------------------------------------------------------------------------------------------------------------------------------------------------------------------------------------------------------------------------------------------------------------------------------------------------------------------------------------------------------------------------------------------------------------------------------------------------------------------------------------------------------------------------------------------------------------------------------------------------------------------------------------------------------------------------------------------------------------------------------------------------------------------------------------------------------------------------------------------------------------------------------------------------------------------------------------------------------------------------------------------------------------------------------------------------------------------------------------------------------------------------------------------------------------------------------------------------------------------------------------------------------------------------------------------------------------------------------------------------------------------------------------------------------------------------------------------------------------------------------------------------------------------------------------------------------------------------------------------------------------------------------------------------|

|            |                              |                         |                           |   |                                                                                                                                                                                                                                                                                                                                                                                                                                                                                                                                                                                                                                                                                                                                                                                                                                                                                                                                                                                                                                                                                                                                                                                                                                                                                                                                                                                                                                                                                                                                                                                                                                                                                                                                                                                                                                    |
|------------|------------------------------|-------------------------|---------------------------|---|------------------------------------------------------------------------------------------------------------------------------------------------------------------------------------------------------------------------------------------------------------------------------------------------------------------------------------------------------------------------------------------------------------------------------------------------------------------------------------------------------------------------------------------------------------------------------------------------------------------------------------------------------------------------------------------------------------------------------------------------------------------------------------------------------------------------------------------------------------------------------------------------------------------------------------------------------------------------------------------------------------------------------------------------------------------------------------------------------------------------------------------------------------------------------------------------------------------------------------------------------------------------------------------------------------------------------------------------------------------------------------------------------------------------------------------------------------------------------------------------------------------------------------------------------------------------------------------------------------------------------------------------------------------------------------------------------------------------------------------------------------------------------------------------------------------------------------|
| GO:0008104 | protein localization         | 126 of 4104 in the list | 302 of 8404 in the genome | 1 | CCG026698. 1, CCG011766. 1, CCG017420. 1, CCG018832. 1, CCG002549. 1, CCG003146. 1, CCG011408. 1, CCG027762. 1, CCG007060. 1, CCG001809. 1, CCG023877. 1, CCG028124. 1, CCG019590. 1, CCG027692. 1, CCG020949. 1, CCG004026. 1, CCG003995. 1, CCG015386. 1, CCG017612. 1, CCG019020. 1, CCG012550. 1, CCG002645. 1, CCG016347. 1, CCG009428. 1, CCG018800. 1, CCG017725. 1, CCG007941. 1, CCG024905. 1, CCG011813. 1, CCG003587. 1, CCG005262. 1, CCG020315. 1, CCG015568. 1, CCG009607. 1, CCG011006. 1, CCG017077. 1, CCG000010. 1, CCG002766. 1, CCG007827. 1, CCG014434. 1, CCG000614. 1, CCG003531. 1, CCG025027. 1, CCG017078. 1, CCG003334. 1, CCG011696. 1, CCG014307. 1, CCG027457. 1, CCG014318. 1, CCG019103. 1, CCG019629. 2, CCG002917. 1, CCG027257. 1, CCG010939. 1, CCG007855. 1, CCG007283. 1, CCG002374. 1, CCG016541. 1, CCG020909. 1, CCG018447. 1, CCG003786. 1, CCG016966. 1, CCG006714. 1, CCG027473. 1, CCG010178. 1, CCG006777. 1, CCG013984. 1, CCG001673. 1, CCG001172. 1, CCG020280. 1, CCG020929. 1, CCG014506. 1, CCG018557. 1, CCG016493. 2, CCG026744. 1, CCG026620. 1, CCG027564. 1, CCG015800. 2, CCG018217. 1, CCG006625. 1, CCG003775. 1, CCG004573. 1, CCG016831. 1, CCG004869. 1, CCG022771. 1, CCG022910. 1, CCG023595. 1, CCG017373. 1, CCG026953. 1, CCG006924. 1, CCG021220. 1, CCG028498. 1, CCG005427. 1, CCG019797. 1, CCG006775. 1, CCG015087. 1, CCG017591. 1, CCG017137. 1, CCG013126. 2, CCG027323. 1, CCG013641. 1, CCG025233. 1, CCG016027. 1, CCG008312. 1, CCG003495. 1, CCG021411. 1, CCG001859. 1, CCG021377. 1, CCG027241. 1, CCG026336. 1, CCG005195. 1, CCG021800. 1, CCG016542. 1, CCG014226. 1, CCG009362. 1, CCG015654. 1, CCG020806. 1, CCG020634. 1, CCG010567. 3, CCG025473. 1, CCG026947. 1, CCG023756. 1, CCG021152. 1, CCG001481. 1, CCG017125. 1, CCG023526. 2 |
| GO:0006631 | fatty acid metabolic process | 12 of 4104 in the list  | 40 of 8404 in the genome  | 1 | CCG009244. 1, CCG006391. 1, CCG017097. 1, CCG025521. 1, CCG012408. 1, CCG025552. 1, CCG018851. 1, CCG003751. 1, CCG027312. 1, CCG000591. 1, CCG019909. 1, CCG018615. 3                                                                                                                                                                                                                                                                                                                                                                                                                                                                                                                                                                                                                                                                                                                                                                                                                                                                                                                                                                                                                                                                                                                                                                                                                                                                                                                                                                                                                                                                                                                                                                                                                                                             |

|            |                                       |                         |                           |   |                                                                                                                                                                                                                                                                                                                                                                                                                                                                                                                                                                                                                                                                                                                                                                                                                                                                                                                                                                                                                                                                                                                                                                                                                                                                                                                                                                                                                                                                                                                                                          |
|------------|---------------------------------------|-------------------------|---------------------------|---|----------------------------------------------------------------------------------------------------------------------------------------------------------------------------------------------------------------------------------------------------------------------------------------------------------------------------------------------------------------------------------------------------------------------------------------------------------------------------------------------------------------------------------------------------------------------------------------------------------------------------------------------------------------------------------------------------------------------------------------------------------------------------------------------------------------------------------------------------------------------------------------------------------------------------------------------------------------------------------------------------------------------------------------------------------------------------------------------------------------------------------------------------------------------------------------------------------------------------------------------------------------------------------------------------------------------------------------------------------------------------------------------------------------------------------------------------------------------------------------------------------------------------------------------------------|
| GO:0006812 | cation transport                      | 107 of 4104 in the list | 260 of 8404 in the genome | 1 | CCG000855. 1, CCG017693. 1, CCG010623. 2, CCG003545. 1, CCG015823. 1, CCG021740. 1, CCG007954. 1, CCG004086. 1, CCG000585. 1, CCG004309. 1, CCG006587. 2, CCG008826. 1, CCG025989. 2, CCG009327. 1, CCG015612. 1, CCG008422. 1, CCG003867. 1, CCG000300. 1, CCG003878. 1, CCG010112. 1, CCG005277. 1, CCG016350. 1, CCG009481. 1, CCG014448. 1, CCG007334. 1, CCG027154. 1, CCG003712. 1, CCG013643. 1, CCG005496. 1, CCG010222. 1, CCG027184. 1, CCG020377. 1, CCG002038. 1, CCG009367. 1, CCG025467. 2, CCG009992. 1, CCG025964. 1, CCG027585. 1, CCG000148. 1, CCG006486. 1, CCG005924. 2, CCG019190. 1, CCG000302. 1, CCG025450. 1, CCG016654. 1, CCG018133. 1, CCG023314. 1, CCG002559. 1, CCG008587. 1, CCG015653. 1, CCG016661. 1, CCG026050. 1, CCG001964. 1, CCG021934. 1, CCG019890. 1, CCG023983. 1, CCG007906. 1, CCG004308. 1, CCG006469. 1, CCG000299. 1, CCG023640. 1, CCG026314. 1, CCG009808. 1, CCG025348. 1, CCG017627. 1, CCG019191. 1, CCG003662. 1, CCG012534. 1, CCG019619. 1, CCG006588. 2, CCG014951. 1, CCG000991. 1, CCG014156. 1, CCG016278. 1, CCG026052. 1, CCG023674. 1, CCG016956. 1, CCG001066. 1, CCG015914. 1, CCG019866. 1, CCG019678. 1, CCG007724. 1, CCG012705. 1, CCG014000. 1, CCG027756. 1, CCG024590. 1, CCG025568. 1, CCG006004. 1, CCG015410. 1, CCG025107. 1, CCG009142. 1, CCG010696. 1, CCG019647. 1, CCG014949. 1, CCG027974. 2, CCG017290. 1, CCG023244. 1, CCG014950. 1, CCG003289. 1, CCG027182. 1, CCG016864. 1, CCG000983. 1, CCG023530. 2, CCG000927. 1, CCG023671. 2, CCG011706. 1, CCG001285. 1 |
| GO:0006518 | peptide metabolic process             | 3 of 4104 in the list   | 15 of 8404 in the genome  | 1 | CCG003192. 1, CCG002897. 1, CCG026099. 1                                                                                                                                                                                                                                                                                                                                                                                                                                                                                                                                                                                                                                                                                                                                                                                                                                                                                                                                                                                                                                                                                                                                                                                                                                                                                                                                                                                                                                                                                                                 |
| GO:0032787 | monocarboxylic acid metabolic process | 17 of 4104 in the list  | 53 of 8404 in the genome  | 1 | CCG003865. 1, CCG026331. 1, CCG009244. 1, CCG025521. 1, CCG012408. 1, CCG020559. 1, CCG000591. 1, CCG018615. 3, CCG015276. 2, CCG006391. 1, CCG017097. 1, CCG018851. 1, CCG025552. 1, CCG003751. 1, CCG016315. 1, CCG027312. 1, CCG019909. 1                                                                                                                                                                                                                                                                                                                                                                                                                                                                                                                                                                                                                                                                                                                                                                                                                                                                                                                                                                                                                                                                                                                                                                                                                                                                                                             |

|            |                            |                         |                           |   |                                                                                                                                                                                                                                                                                                                                                                                                                                                                                                                                                                                                                                                                                                                                                                                                                                                                                                                                                                                                                                                                                                                                                                                                                                                                                                                                                                                                                                                                                                                                                                                                                                                                                                                                                                                                                                                                                                                                                                   |
|------------|----------------------------|-------------------------|---------------------------|---|-------------------------------------------------------------------------------------------------------------------------------------------------------------------------------------------------------------------------------------------------------------------------------------------------------------------------------------------------------------------------------------------------------------------------------------------------------------------------------------------------------------------------------------------------------------------------------------------------------------------------------------------------------------------------------------------------------------------------------------------------------------------------------------------------------------------------------------------------------------------------------------------------------------------------------------------------------------------------------------------------------------------------------------------------------------------------------------------------------------------------------------------------------------------------------------------------------------------------------------------------------------------------------------------------------------------------------------------------------------------------------------------------------------------------------------------------------------------------------------------------------------------------------------------------------------------------------------------------------------------------------------------------------------------------------------------------------------------------------------------------------------------------------------------------------------------------------------------------------------------------------------------------------------------------------------------------------------------|
| GO:0033036 | macromolecule localization | 141 of 4104 in the list | 336 of 8404 in the genome | 1 | CCG017420. 1, CCG018832. 1, CCG002549. 1, CCG003146. 1, CCG011408. 1, CCG027762. 1, CCG001809. 1, CCG028124. 1, CCG020949. 1, CCG004026. 1, CCG003995. 1, CCG015386. 1, CCG019020. 1, CCG012550. 1, CCG002645. 1, CCG009428. 1, CCG007941. 1, CCG024905. 1, CCG003587. 1, CCG011338. 1, CCG009607. 1, CCG011006. 1, CCG002766. 1, CCG000614. 1, CCG011567. 1, CCG017078. 1, CCG011696. 1, CCG014307. 1, CCG027457. 1, CCG014318. 1, CCG002917. 1, CCG027368. 1, CCG001220. 1, CCG010939. 1, CCG007855. 1, CCG011858. 1, CCG024032. 1, CCG016541. 1, CCG003786. 1, CCG006714. 1, CCG027473. 1, CCG001673. 1, CCG014506. 1, CCG018557. 1, CCG016493. 2, CCG026744. 1, CCG027564. 1, CCG006625. 1, CCG004573. 1, CCG004869. 1, CCG000524. 1, CCG013408. 2, CCG022771. 1, CCG022910. 1, CCG017373. 1, CCG006489. 1, CCG026953. 1, CCG006924. 1, CCG021220. 1, CCG017591. 1, CCG017137. 1, CCG013641. 1, CCG025233. 1, CCG003495. 1, CCG021411. 1, CCG001859. 1, CCG027241. 1, CCG005195. 1, CCG014226. 1, CCG020806. 1, CCG020634. 1, CCG010567. 3, CCG026947. 1, CCG023756. 1, CCG021152. 1, CCG017125. 1, CCG023526. 2, CCG026698. 1, CCG011766. 1, CCG005786. 1, CCG007060. 1, CCG023877. 1, CCG019590. 1, CCG027692. 1, CCG001221. 1, CCG017612. 1, CCG016347. 1, CCG018800. 1, CCG017725. 1, CCG011813. 1, CCG005262. 1, CCG020315. 1, CCG015568. 1, CCG000010. 1, CCG017077. 1, CCG007827. 1, CCG014434. 1, CCG003531. 1, CCG025027. 1, CCG003334. 1, CCG019103. 1, CCG019629. 2, CCG027257. 1, CCG007283. 1, CCG002374. 1, CCG020909. 1, CCG018447. 1, CCG016966. 1, CCG026989. 1, CCG010178. 1, CCG006777. 1, CCG013984. 1, CCG001172. 1, CCG020280. 1, CCG020929. 1, CCG026620. 1, CCG018217. 1, CCG015800. 2, CCG003775. 1, CCG016831. 1, CCG021221. 1, CCG023595. 1, CCG009454. 1, CCG028498. 1, CCG019797. 1, CCG005427. 1, CCG015087. 1, CCG006775. 1, CCG013126. 2, CCG027323. 1, CCG016027. 1, CCG008312. 1, CCG026336. 1, CCG021377. 1, CCG021800. 1, |
|------------|----------------------------|-------------------------|---------------------------|---|-------------------------------------------------------------------------------------------------------------------------------------------------------------------------------------------------------------------------------------------------------------------------------------------------------------------------------------------------------------------------------------------------------------------------------------------------------------------------------------------------------------------------------------------------------------------------------------------------------------------------------------------------------------------------------------------------------------------------------------------------------------------------------------------------------------------------------------------------------------------------------------------------------------------------------------------------------------------------------------------------------------------------------------------------------------------------------------------------------------------------------------------------------------------------------------------------------------------------------------------------------------------------------------------------------------------------------------------------------------------------------------------------------------------------------------------------------------------------------------------------------------------------------------------------------------------------------------------------------------------------------------------------------------------------------------------------------------------------------------------------------------------------------------------------------------------------------------------------------------------------------------------------------------------------------------------------------------------|

|            |                                                                                 |                        |                           |   |                                                                                                                                                                                                                                                                                                                                                                                                                                                                                                                                                                                                                                                                                                                                                                                                                                                                                                                                              |
|------------|---------------------------------------------------------------------------------|------------------------|---------------------------|---|----------------------------------------------------------------------------------------------------------------------------------------------------------------------------------------------------------------------------------------------------------------------------------------------------------------------------------------------------------------------------------------------------------------------------------------------------------------------------------------------------------------------------------------------------------------------------------------------------------------------------------------------------------------------------------------------------------------------------------------------------------------------------------------------------------------------------------------------------------------------------------------------------------------------------------------------|
| GO:0007186 | G-protein coupled receptor signaling pathway                                    | 65 of 4104 in the list | 167 of 8404 in the genome | 1 | CCG015280. 1, CCG012989. 1, CCG024662. 1, CCG017791. 1, CCG009446. 1, CCG007135. 1, CCG008939. 1, CCG011644. 1, CCG014844. 1, CCG003170. 1, CCG020785. 1, CCG018200. 1, CCG014345. 2, CCG002841. 1, CCG012684. 1, CCG004396. 1, CCG019881. 1, CCG025035. 1, CCG022367. 1, CCG012573. 1, CCG000984. 1, CCG026921. 1, CCG019646. 1, CCG023151. 1, CCG009553. 1, CCG000077. 1, CCG016608. 2, CCG023002. 1, CCG023662. 1, CCG010071. 1, CCG015807. 1, CCG008526. 1, CCG000078. 1, CCG009531. 1, CCG024952. 1, CCG026109. 1, CCG017696. 1, CCG024663. 1, CCG018930. 1, CCG024066. 1, CCG025036. 1, CCG027014. 1, CCG007317. 1, CCG020590. 1, CCG011297. 1, CCG009427. 1, CCG020659. 1, CCG019493. 1, CCG013608. 1, CCG000732. 1, CCG008755. 1, CCG007951. 1, CCG027921. 1, CCG025238. 1, CCG006412. 1, CCG014837. 1, CCG021862. 1, CCG017701. 1, CCG012988. 1, CCG004238. 1, CCG008185. 1, CCG022427. 1, CCG019721. 1, CCG008360. 1, CCG024664. 1 |
| GO:0015988 | energy coupled proton transmembrane transport, against electrochemical gradient | 10 of 4104 in the list | 36 of 8404 in the genome  | 1 | CCG025450. 1, CCG001066. 1, CCG000585. 1, CCG007724. 1, CCG006486. 1, CCG003662. 1, CCG021934. 1, CCG019619. 1, CCG001285. 1, CCG008422. 1                                                                                                                                                                                                                                                                                                                                                                                                                                                                                                                                                                                                                                                                                                                                                                                                   |
| GO:0015991 | ATP hydrolysis coupled proton transport                                         | 10 of 4104 in the list | 36 of 8404 in the genome  | 1 | CCG025450. 1, CCG001066. 1, CCG000585. 1, CCG007724. 1, CCG006486. 1, CCG003662. 1, CCG021934. 1, CCG019619. 1, CCG001285. 1, CCG008422. 1                                                                                                                                                                                                                                                                                                                                                                                                                                                                                                                                                                                                                                                                                                                                                                                                   |

|            |                                       |                        |                           |   |                                                                                                                                                                                                                                                                                                                                                                                                                                                                                                                                                                                                                                                                                                                                                                                                                                                                                                                                                                                        |
|------------|---------------------------------------|------------------------|---------------------------|---|----------------------------------------------------------------------------------------------------------------------------------------------------------------------------------------------------------------------------------------------------------------------------------------------------------------------------------------------------------------------------------------------------------------------------------------------------------------------------------------------------------------------------------------------------------------------------------------------------------------------------------------------------------------------------------------------------------------------------------------------------------------------------------------------------------------------------------------------------------------------------------------------------------------------------------------------------------------------------------------|
| GO:0015672 | monovalent inorganic cation transport | 68 of 4104 in the list | 175 of 8404 in the genome | 1 | CCG017693. 1, CCG007954. 1, CCG004086. 1, CCG000585. 1, CCG004309. 1, CCG006587. 2, CCG025989. 2, CCG008422. 1, CCG003867. 1, CCG000300. 1, CCG010112. 1, CCG016350. 1, CCG003712. 1, CCG013643. 1, CCG005496. 1, CCG010222. 1, CCG027184. 1, CCG002038. 1, CCG025964. 1, CCG000148. 1, CCG006486. 1, CCG005924. 2, CCG019190. 1, CCG025450. 1, CCG016654. 1, CCG023314. 1, CCG002559. 1, CCG008587. 1, CCG015653. 1, CCG001964. 1, CCG021934. 1, CCG019890. 1, CCG004308. 1, CCG006469. 1, CCG000299. 1, CCG023640. 1, CCG026314. 1, CCG025348. 1, CCG019191. 1, CCG012534. 1, CCG003662. 1, CCG006588. 2, CCG019619. 1, CCG000991. 1, CCG014951. 1, CCG014156. 1, CCG016956. 1, CCG001066. 1, CCG015914. 1, CCG007724. 1, CCG019678. 1, CCG014000. 1, CCG027756. 1, CCG006004. 1, CCG015410. 1, CCG025107. 1, CCG009142. 1, CCG010696. 1, CCG014949. 1, CCG019647. 1, CCG023244. 1, CCG014950. 1, CCG003289. 1, CCG027182. 1, CCG016864. 1, CCG023530. 2, CCG001285. 1, CCG023671. 2 |
| GO:0006633 | fatty acid biosynthetic process       | 7 of 4104 in the list  | 28 of 8404 in the genome  | 1 | CCG012408. 1, CCG003751. 1, CCG027312. 1, CCG009244. 1, CCG019909. 1, CCG017097. 1, CCG018615. 3                                                                                                                                                                                                                                                                                                                                                                                                                                                                                                                                                                                                                                                                                                                                                                                                                                                                                       |
| GO:0006814 | sodium ion transport                  | 24 of 4104 in the list | 72 of 8404 in the genome  | 1 | CCG004308. 1, CCG006004. 1, CCG017693. 1, CCG000299. 1, CCG025964. 1, CCG026314. 1, CCG007954. 1, CCG004086. 1, CCG004309. 1, CCG014949. 1, CCG014950. 1, CCG014951. 1, CCG003289. 1, CCG000300. 1, CCG016654. 1, CCG023314. 1, CCG016350. 1, CCG016956. 1, CCG015914. 1, CCG015653. 1, CCG027756. 1, CCG010222. 1, CCG005496. 1, CCG023671. 2                                                                                                                                                                                                                                                                                                                                                                                                                                                                                                                                                                                                                                         |

|            |                                         |                        |                           |   |                                                                                                                                                                                                                                                                                                                                                                                                                                                                                                                                                                                                                                                                                                                                                                                                                                                                                                                                                                                                                                                                                                                                                                                                          |
|------------|-----------------------------------------|------------------------|---------------------------|---|----------------------------------------------------------------------------------------------------------------------------------------------------------------------------------------------------------------------------------------------------------------------------------------------------------------------------------------------------------------------------------------------------------------------------------------------------------------------------------------------------------------------------------------------------------------------------------------------------------------------------------------------------------------------------------------------------------------------------------------------------------------------------------------------------------------------------------------------------------------------------------------------------------------------------------------------------------------------------------------------------------------------------------------------------------------------------------------------------------------------------------------------------------------------------------------------------------|
| GO:0007166 | cell surface receptor signaling pathway | 83 of 4104 in the list | 210 of 8404 in the genome | 1 | CCG015280. 1, CCG012989. 1, CCG024662. 1, CCG020978. 1, CCG017791. 1, CCG009446. 1, CCG007135. 1, CCG008939. 1, CCG011644. 1, CCG014844. 1, CCG007152. 1, CCG003170. 1, CCG020785. 1, CCG002694. 1, CCG018200. 1, CCG014345. 2, CCG002841. 1, CCG012684. 1, CCG004396. 1, CCG019881. 1, CCG025035. 1, CCG022367. 1, CCG012573. 1, CCG010631. 1, CCG000984. 1, CCG022741. 1, CCG026921. 1, CCG019646. 1, CCG023151. 1, CCG000077. 1, CCG009553. 1, CCG016608. 2, CCG024918. 1, CCG018533. 1, CCG023002. 1, CCG023662. 1, CCG000526. 1, CCG010071. 1, CCG013272. 2, CCG015807. 1, CCG008526. 1, CCG000078. 1, CCG009531. 1, CCG026109. 1, CCG024952. 1, CCG004279. 1, CCG022929. 1, CCG017696. 1, CCG024663. 1, CCG018930. 1, CCG024066. 1, CCG025036. 1, CCG018494. 1, CCG015544. 1, CCG027014. 1, CCG020590. 1, CCG007317. 1, CCG020733. 1, CCG011297. 1, CCG009427. 1, CCG020659. 1, CCG019493. 1, CCG025782. 1, CCG013608. 1, CCG000732. 1, CCG008755. 1, CCG007951. 1, CCG027921. 1, CCG025238. 1, CCG006412. 1, CCG016307. 1, CCG014837. 1, CCG008444. 1, CCG021862. 1, CCG017701. 1, CCG012988. 1, CCG004238. 1, CCG008185. 1, CCG022427. 1, CCG019721. 1, CCG008360. 1, CCG024664. 1, CCG021354. 1 |
|------------|-----------------------------------------|------------------------|---------------------------|---|----------------------------------------------------------------------------------------------------------------------------------------------------------------------------------------------------------------------------------------------------------------------------------------------------------------------------------------------------------------------------------------------------------------------------------------------------------------------------------------------------------------------------------------------------------------------------------------------------------------------------------------------------------------------------------------------------------------------------------------------------------------------------------------------------------------------------------------------------------------------------------------------------------------------------------------------------------------------------------------------------------------------------------------------------------------------------------------------------------------------------------------------------------------------------------------------------------|



|            |                                 |                          |                            |   |                                                                                                                                                                                                                                                                                                                                                                                                                                                                                                                                                                                                                                                                                                                                                                                                                                                                                                                                                                                                                                                                                                                                                                                                                                                                                                                                                                                                                                                                                                                                                                                                                                                                                                                                                                                                                                                                                                                                                                   |
|------------|---------------------------------|--------------------------|----------------------------|---|-------------------------------------------------------------------------------------------------------------------------------------------------------------------------------------------------------------------------------------------------------------------------------------------------------------------------------------------------------------------------------------------------------------------------------------------------------------------------------------------------------------------------------------------------------------------------------------------------------------------------------------------------------------------------------------------------------------------------------------------------------------------------------------------------------------------------------------------------------------------------------------------------------------------------------------------------------------------------------------------------------------------------------------------------------------------------------------------------------------------------------------------------------------------------------------------------------------------------------------------------------------------------------------------------------------------------------------------------------------------------------------------------------------------------------------------------------------------------------------------------------------------------------------------------------------------------------------------------------------------------------------------------------------------------------------------------------------------------------------------------------------------------------------------------------------------------------------------------------------------------------------------------------------------------------------------------------------------|
| GO:0043170 | macromolecule metabolic process | 1608 of 4104 in the list | 3426 of 8404 in the genome | 1 | CCG014531. 2, CCG006922. 1, CCG027068. 1, CCG014396. 1, CCG006549. 1, CCG004887. 1, CCG006912. 1, CCG026106. 1, CCG016952. 1, CCG028016. 1, CCG026174. 1, CCG004468. 1, CCG012726. 1, CCG019308. 1, CCG024584. 1, CCG004020. 1, CCG001292. 1, CCG018432. 1, CCG001040. 1, CCG017266. 1, CCG006875. 2, CCG028198. 1, CCG016689. 2, CCG025208. 1, CCG021479. 1, CCG003362. 1, CCG019113. 1, CCG002634. 1, CCG023381. 1, CCG019382. 1, CCG019735. 1, CCG017289. 1, CCG016094. 1, CCG026413. 3, CCG023474. 1, CCG026871. 2, CCG010792. 1, CCG012623. 1, CCG021616. 1, CCG003767. 1, CCG005738. 1, CCG013876. 1, CCG010905. 1, CCG008270. 1, CCG024612. 1, CCG027636. 1, CCG028653. 1, CCG003624. 1, CCG004569. 1, CCG020286. 1, CCG013109. 1, CCG006465. 1, CCG015074. 1, CCG019571. 1, CCG008871. 1, CCG015694. 1, CCG018788. 1, CCG006484. 1, CCG002982. 1, CCG012083. 1, CCG026602. 1, CCG023686. 1, CCG007457. 1, CCG021737. 1, CCG025990. 1, CCG028590. 1, CCG015350. 1, CCG021948. 1, CCG018585. 3, CCG020651. 1, CCG007467. 1, CCG014385. 1, CCG005284. 1, CCG004927. 1, CCG009805. 2, CCG005089. 1, CCG021137. 1, CCG022056. 1, CCG001876. 1, CCG012584. 1, CCG015186. 1, CCG012023. 1, CCG016327. 2, CCG018688. 1, CCG024200. 1, CCG010624. 1, CCG003608. 1, CCG012957. 1, CCG023502. 1, CCG028454. 1, CCG020663. 1, CCG023458. 1, CCG027748. 1, CCG017001. 1, CCG021767. 1, CCG003520. 1, CCG024865. 1, CCG004926. 1, CCG006928. 1, CCG017381. 1, CCG010912. 1, CCG004955. 1, CCG007874. 3, CCG001704. 1, CCG005524. 1, CCG001289. 1, CCG013640. 1, CCG008404. 1, CCG018201. 1, CCG010136. 1, CCG006174. 1, CCG009574. 1, CCG022370. 1, CCG020179. 1, CCG010112. 1, CCG009038. 1, CCG022513. 2, CCG004986. 1, CCG007750. 2, CCG027989. 1, CCG025707. 1, CCG028092. 1, CCG020078. 1, CCG019831. 2, CCG000209. 1, CCG023486. 1, CCG001395. 1, CCG016557. 1, CCG005594. 1, CCG024922. 1, CCG027000. 1, CCG022871. 1, CCG022183. 1, CCG006804. 1, CCG018168. 1, |
| GO:0032502 | developmental process           | 19 of 4104 in the list   | 61 of 8404 in the genome   | 1 | CCG015767. 2, CCG004753. 1, CCG006750. 1, CCG000133. 1, CCG008075. 1, CCG028595. 1, CCG017777. 1, CCG021681. 1, CCG012835. 1, CCG028121. 1, CCG007152. 1, CCG002694. 1, CCG015458. 1, CCG027945. 1, CCG027763. 1, CCG019427. 1, CCG015596. 1, CCG013272. 2, CCG016035. 1                                                                                                                                                                                                                                                                                                                                                                                                                                                                                                                                                                                                                                                                                                                                                                                                                                                                                                                                                                                                                                                                                                                                                                                                                                                                                                                                                                                                                                                                                                                                                                                                                                                                                          |

|            |                                               |                        |                           |   |                                                                                                                                                                                                                                                                                                                                                                                                                                                                                                                                                                                                                                                                                                                                                                                                                                                                                                                  |
|------------|-----------------------------------------------|------------------------|---------------------------|---|------------------------------------------------------------------------------------------------------------------------------------------------------------------------------------------------------------------------------------------------------------------------------------------------------------------------------------------------------------------------------------------------------------------------------------------------------------------------------------------------------------------------------------------------------------------------------------------------------------------------------------------------------------------------------------------------------------------------------------------------------------------------------------------------------------------------------------------------------------------------------------------------------------------|
| GO:0007275 | multicellular organismal development          | 10 of 4104 in the list | 38 of 8404 in the genome  | 1 | CCG012835. 1, CCG007152. 1, CCG028121. 1, CCG000133. 1, CCG002694. 1, CCG027945. 1, CCG019427. 1, CCG027763. 1, CCG028595. 1, CCG013272. 2                                                                                                                                                                                                                                                                                                                                                                                                                                                                                                                                                                                                                                                                                                                                                                       |
| GO:0044743 | intracellular protein transmembrane import    | 2 of 4104 in the list  | 14 of 8404 in the genome  | 1 | CCG019797. 1, CCG020949. 1                                                                                                                                                                                                                                                                                                                                                                                                                                                                                                                                                                                                                                                                                                                                                                                                                                                                                       |
| GO:0065002 | intracellular protein transmembrane transport | 2 of 4104 in the list  | 14 of 8404 in the genome  | 1 | CCG019797. 1, CCG020949. 1                                                                                                                                                                                                                                                                                                                                                                                                                                                                                                                                                                                                                                                                                                                                                                                                                                                                                       |
| GO:0071806 | protein transmembrane transport               | 2 of 4104 in the list  | 14 of 8404 in the genome  | 1 | CCG019797. 1, CCG020949. 1                                                                                                                                                                                                                                                                                                                                                                                                                                                                                                                                                                                                                                                                                                                                                                                                                                                                                       |
| GO:0044767 | single-organism developmental process         | 18 of 4104 in the list | 60 of 8404 in the genome  | 1 | CCG015767. 2, CCG004753. 1, CCG006750. 1, CCG000133. 1, CCG008075. 1, CCG028595. 1, CCG021681. 1, CCG012835. 1, CCG028121. 1, CCG007152. 1, CCG002694. 1, CCG015458. 1, CCG027945. 1, CCG027763. 1, CCG019427. 1, CCG015596. 1, CCG013272. 2, CCG016035. 1                                                                                                                                                                                                                                                                                                                                                                                                                                                                                                                                                                                                                                                       |
| GO:0030001 | metal ion transport                           | 63 of 4104 in the list | 169 of 8404 in the genome | 1 | CCG004308. 1, CCG006469. 1, CCG017693. 1, CCG000299. 1, CCG010623. 2, CCG015823. 1, CCG026314. 1, CCG007954. 1, CCG004086. 1, CCG009808. 1, CCG004309. 1, CCG019191. 1, CCG006587. 2, CCG008826. 1, CCG006588. 2, CCG015612. 1, CCG014951. 1, CCG000991. 1, CCG000300. 1, CCG003878. 1, CCG014156. 1, CCG005277. 1, CCG016956. 1, CCG016350. 1, CCG015914. 1, CCG014448. 1, CCG027154. 1, CCG019866. 1, CCG012705. 1, CCG014000. 1, CCG027756. 1, CCG005496. 1, CCG010222. 1, CCG024590. 1, CCG027184. 1, CCG020377. 1, CCG025568. 1, CCG006004. 1, CCG009992. 1, CCG025964. 1, CCG027585. 1, CCG014949. 1, CCG019647. 1, CCG027974. 2, CCG017290. 1, CCG014950. 1, CCG003289. 1, CCG019190. 1, CCG000302. 1, CCG027182. 1, CCG016654. 1, CCG018133. 1, CCG016864. 1, CCG023314. 1, CCG002559. 1, CCG008587. 1, CCG015653. 1, CCG023530. 2, CCG000927. 1, CCG001964. 1, CCG019890. 1, CCG023671. 2, CCG011706. 1 |

|            |                             |                         |                           |   |                                                                                                                                                                                                                                                                                                                                                                                                                                                                                                                                                                                                                                                                                                                                                                                                                                                                                                                                                                                                                                                                                                                                                                                                                                                                                                                                                                                                                                                                     |
|------------|-----------------------------|-------------------------|---------------------------|---|---------------------------------------------------------------------------------------------------------------------------------------------------------------------------------------------------------------------------------------------------------------------------------------------------------------------------------------------------------------------------------------------------------------------------------------------------------------------------------------------------------------------------------------------------------------------------------------------------------------------------------------------------------------------------------------------------------------------------------------------------------------------------------------------------------------------------------------------------------------------------------------------------------------------------------------------------------------------------------------------------------------------------------------------------------------------------------------------------------------------------------------------------------------------------------------------------------------------------------------------------------------------------------------------------------------------------------------------------------------------------------------------------------------------------------------------------------------------|
| GO:0006260 | DNA replication             | 101 of 4104 in the list | 267 of 8404 in the genome | 1 | CCG025352. 1, CCG016237. 1, CCG026841. 1, CCG006549. 1, CCG007336. 1, CCG000823. 1, CCG007710. 1, CCG005501. 1, CCG003161. 1, CCG011912. 1, CCG004534. 1, CCG027067. 1, CCG004468. 1, CCG02811. 1, CCG013631. 1, CCG015711. 1, CCG027407. 4, CCG020871. 1, CCG026258. 1, CCG018321. 1, CCG007902. 1, CCG001000. 1, CCG028505. 1, CCG024232. 1, CCG008719. 1, CCG006164. 1, CCG015599. 1, CCG004398. 1, CCG025208. 1, CCG012213. 2, CCG004012. 2, CCG003904. 1, CCG025658. 1, CCG004332. 1, CCG018649. 1, CCG022990. 1, CCG013353. 1, CCG004719. 1, CCG012623. 1, CCG003402. 1, CCG020652. 1, CCG006968. 1, CCG015929. 1, CCG008126. 1, CCG025541. 1, CCG018799. 1, CCG022735. 1, CCG022792. 1, CCG005276. 1, CCG024326. 1, CCG021295. 1, CCG013722. 1, CCG018583. 1, CCG017380. 1, CCG008044. 1, CCG014280. 1, CCG013065. 1, CCG019446. 1, CCG015694. 1, CCG021949. 1, CCG013865. 1, CCG000738. 1, CCG010378. 2, CCG027114. 1, CCG011366. 1, CCG018660. 1, CCG007741. 1, CCG009140. 1, CCG022475. 1, CCG014486. 1, CCG023468. 1, CCG013993. 1, CCG023939. 1, CCG002942. 1, CCG009119. 1, CCG007611. 1, CCG020869. 1, CCG015350. 1, CCG015312. 2, CCG022311. 1, CCG025283. 1, CCG000490. 1, CCG000950. 1, CCG021948. 1, CCG011148. 1, CCG005269. 1, CCG020651. 1, CCG028222. 1, CCG013917. 1, CCG003231. 1, CCG021137. 1, CCG016381. 1, CCG017550. 1, CCG011727. 1, CCG016576. 1, CCG009896. 1, CCG022428. 1, CCG028426. 1, CCG017001. 1, CCG009141. 1, CCG023633. 1 |
| GO:0050909 | sensory perception of taste | 3 of 4104 in the list   | 38 of 8404 in the genome  | 1 | CCG004249. 1, CCG003558. 1, CCG008512. 1                                                                                                                                                                                                                                                                                                                                                                                                                                                                                                                                                                                                                                                                                                                                                                                                                                                                                                                                                                                                                                                                                                                                                                                                                                                                                                                                                                                                                            |
| GO:0007600 | sensory perception          | 15 of 4104 in the list  | 152 of 8404 in the genome | 1 | CCG009531. 1, CCG012989. 1, CCG012988. 1, CCG006802. 1, CCG004238. 1, CCG007317. 1, CCG011758. 1, CCG010071. 1, CCG020881. 1, CCG017696. 1, CCG004249. 1, CCG017217. 3, CCG003558. 1, CCG018930. 1, CCG008512. 1                                                                                                                                                                                                                                                                                                                                                                                                                                                                                                                                                                                                                                                                                                                                                                                                                                                                                                                                                                                                                                                                                                                                                                                                                                                    |
| GO:0003008 | system process              | 16 of 4104 in the list  | 159 of 8404 in the genome | 1 | CCG009531. 1, CCG012989. 1, CCG012988. 1, CCG006802. 1, CCG008323. 1, CCG004238. 1, CCG007317. 1, CCG011758. 1, CCG010071. 1, CCG020881. 1, CCG017696. 1, CCG004249. 1, CCG017217. 3, CCG003558. 1, CCG018930. 1, CCG008512. 1                                                                                                                                                                                                                                                                                                                                                                                                                                                                                                                                                                                                                                                                                                                                                                                                                                                                                                                                                                                                                                                                                                                                                                                                                                      |
| GO:0050877 | neurological system process | 16 of 4104 in the list  | 159 of 8404 in the genome | 1 | CCG009531. 1, CCG012989. 1, CCG012988. 1, CCG006802. 1, CCG008323. 1, CCG004238. 1, CCG007317. 1, CCG011758. 1, CCG010071. 1, CCG020881. 1, CCG017696. 1, CCG004249. 1, CCG017217. 3, CCG003558. 1, CCG018930. 1, CCG008512. 1                                                                                                                                                                                                                                                                                                                                                                                                                                                                                                                                                                                                                                                                                                                                                                                                                                                                                                                                                                                                                                                                                                                                                                                                                                      |
| GO:0007608 | sensory perception of smell | 4 of 4104 in the list   | 93 of 8404 in the genome  | 1 | CCG020881. 1, CCG017217. 3, CCG006802. 1, CCG011758. 1                                                                                                                                                                                                                                                                                                                                                                                                                                                                                                                                                                                                                                                                                                                                                                                                                                                                                                                                                                                                                                                                                                                                                                                                                                                                                                                                                                                                              |

|            |                                         |                        |                           |   |                                                                                                                                                                                                                                                                                                                                                                                                                                                                                                                        |
|------------|-----------------------------------------|------------------------|---------------------------|---|------------------------------------------------------------------------------------------------------------------------------------------------------------------------------------------------------------------------------------------------------------------------------------------------------------------------------------------------------------------------------------------------------------------------------------------------------------------------------------------------------------------------|
| GO:0032501 | multicellular organismal process        | 28 of 4104 in the list | 200 of 8404 in the genome | 1 | CCG022367. 1, CCG009531. 1, CCG000133. 1, CCG012989. 1, CCG006802. 1, CCG017791. 1, CCG011758. 1, CCG017696. 1, CCG028595. 1, CCG004249. 1, CCG017217. 3, CCG018930. 1, CCG008512. 1, CCG012835. 1, CCG007152. 1, CCG028121. 1, CCG002694. 1, CCG012988. 1, CCG008323. 1, CCG007317. 1, CCG004238. 1, CCG027945. 1, CCG010071. 1, CCG027763. 1, CCG019427. 1, CCG020881. 1, CCG013272. 2, CCG003558. 1                                                                                                                 |
| GO:0007606 | sensory perception of chemical stimulus | 7 of 4104 in the list  | 131 of 8404 in the genome | 1 | CCG020881. 1, CCG004249. 1, CCG017217. 3, CCG003558. 1, CCG006802. 1, CCG008512. 1, CCG011758. 1                                                                                                                                                                                                                                                                                                                                                                                                                       |
| GO:0044707 | single-multicellular organism process   | 28 of 4104 in the list | 198 of 8404 in the genome | 1 | CCG022367. 1, CCG009531. 1, CCG000133. 1, CCG012989. 1, CCG006802. 1, CCG017791. 1, CCG011758. 1, CCG017696. 1, CCG028595. 1, CCG004249. 1, CCG017217. 3, CCG018930. 1, CCG008512. 1, CCG012835. 1, CCG007152. 1, CCG028121. 1, CCG002694. 1, CCG012988. 1, CCG008323. 1, CCG007317. 1, CCG004238. 1, CCG027945. 1, CCG010071. 1, CCG027763. 1, CCG019427. 1, CCG020881. 1, CCG013272. 2, CCG003558. 1                                                                                                                 |
| GO:0006278 | RNA-dependent DNA replication           | 36 of 4104 in the list | 196 of 8404 in the genome | 1 | CCG005276. 1, CCG008044. 1, CCG007710. 1, CCG013065. 1, CCG005501. 1, CCG019446. 1, CCG003161. 1, CCG004534. 1, CCG013865. 1, CCG027114. 1, CCG004468. 1, CCG022811. 1, CCG013631. 1, CCG007741. 1, CCG027407. 4, CCG022475. 1, CCG007902. 1, CCG001000. 1, CCG004398. 1, CCG009119. 1, CCG015350. 1, CCG012213. 2, CCG025283. 1, CCG022311. 1, CCG025658. 1, CCG018649. 1, CCG004719. 1, CCG022990. 1, CCG003231. 1, CCG021137. 1, CCG006968. 1, CCG011727. 1, CCG028426. 1, CCG025541. 1, CCG017001. 1, CCG022792. 1 |

|            |                 |                        |                           |   |                                                                                                                                                                                                                                                                                                                                                                                                                                                                                                                                                                                                                                                                                                                                                                                                                                                                                                                                                           |
|------------|-----------------|------------------------|---------------------------|---|-----------------------------------------------------------------------------------------------------------------------------------------------------------------------------------------------------------------------------------------------------------------------------------------------------------------------------------------------------------------------------------------------------------------------------------------------------------------------------------------------------------------------------------------------------------------------------------------------------------------------------------------------------------------------------------------------------------------------------------------------------------------------------------------------------------------------------------------------------------------------------------------------------------------------------------------------------------|
| GO:0015074 | DNA integration | 66 of 4104 in the list | 411 of 8404 in the genome | 1 | CCG022500. 1, CCG004270. 1, CCG013652. 1, CCG004907. 1, CCG021260. 1, CCG015393. 1, CCG023142. 2, CCG003161. 1, CCG003594. 1, CCG017166. 1, CCG015376. 3, CCG020953. 1, CCG022513. 2, CCG01734. 1, CCG016179. 1, CCG024584. 1, CCG001361. 1, CCG002202. 2, CCG006237. 1, CCG023486. 1, CCG000451. 1, CCG014696. 1, CCG009549. 1, CCG019642. 1, CCG021364. 1, CCG008496. 1, CCG026464. 1, CCG010287. 1, CCG009575. 1, CCG022113. 1, CCG026493. 1, CCG027703. 1, CCG000073. 1, CCG004412. 1, CCG005275. 1, CCG007916. 1, CCG008752. 1, CCG006020. 1, CCG011776. 1, CCG012401. 1, CCG013397. 1, CCG026312. 2, CCG013065. 1, CCG021639. 1, CCG009173. 1, CCG013159. 1, CCG007708. 1, CCG016872. 1, CCG010915. 1, CCG003137. 1, CCG013054. 1, CCG011001. 1, CCG022961. 1, CCG012980. 1, CCG000208. 1, CCG020016. 1, CCG025283. 1, CCG022228. 1, CCG015137. 1, CCG007181. 1, CCG009265. 1, CCG013381. 1, CCG017001. 1, CCG013525. 1, CCG014484. 1, CCG021767. 1 |
|------------|-----------------|------------------------|---------------------------|---|-----------------------------------------------------------------------------------------------------------------------------------------------------------------------------------------------------------------------------------------------------------------------------------------------------------------------------------------------------------------------------------------------------------------------------------------------------------------------------------------------------------------------------------------------------------------------------------------------------------------------------------------------------------------------------------------------------------------------------------------------------------------------------------------------------------------------------------------------------------------------------------------------------------------------------------------------------------|

|            |                       |                         |                           |   |                                                                                                                                                                                                                                                                                                                                                                                                                                                                                                                                                                                                                                                                                                                                                                                                                                                                                                                                                                                                                                                                                                                                                                                                                                                                                                                                                                                                                                                                                                                                                                                                                                                                                                                                                                                                                                                                                                                                                                   |
|------------|-----------------------|-------------------------|---------------------------|---|-------------------------------------------------------------------------------------------------------------------------------------------------------------------------------------------------------------------------------------------------------------------------------------------------------------------------------------------------------------------------------------------------------------------------------------------------------------------------------------------------------------------------------------------------------------------------------------------------------------------------------------------------------------------------------------------------------------------------------------------------------------------------------------------------------------------------------------------------------------------------------------------------------------------------------------------------------------------------------------------------------------------------------------------------------------------------------------------------------------------------------------------------------------------------------------------------------------------------------------------------------------------------------------------------------------------------------------------------------------------------------------------------------------------------------------------------------------------------------------------------------------------------------------------------------------------------------------------------------------------------------------------------------------------------------------------------------------------------------------------------------------------------------------------------------------------------------------------------------------------------------------------------------------------------------------------------------------------|
| GO:0006259 | DNA metabolic process | 342 of 4104 in the list | 912 of 8404 in the genome | 1 | CCG027300. 1, CCG006606. 1, CCG006549. 1, CCG003361. 1, CCG026106. 1, CCG010647. 1, CCG013625. 1, CCG004468. 1, CCG020953. 1, CCG026473. 1, CCG024584. 1, CCG002202. 2, CCG018321. 1, CCG006237. 1, CCG028505. 1, CCG005194. 1, CCG015599. 1, CCG004398. 1, CCG014836. 1, CCG000213. 1, CCG024177. 1, CCG025208. 1, CCG012514. 1, CCG027196. 1, CCG012213. 2, CCG016094. 1, CCG027183. 2, CCG023474. 1, CCG000166. 1, CCG010287. 1, CCG013353. 1, CCG012623. 1, CCG004515. 1, CCG019692. 1, CCG010905. 1, CCG004078. 1, CCG018799. 1, CCG010909. 1, CCG005275. 1, CCG005276. 1, CCG024326. 1, CCG021295. 1, CCG017580. 1, CCG009980. 1, CCG011776. 1, CCG027133. 1, CCG010649. 1, CCG014280. 1, CCG013065. 1, CCG015560. 1, CCG003438. 1, CCG010116. 1, CCG015694. 1, CCG013865. 1, CCG010378. 2, CCG027114. 1, CCG008559. 1, CCG027696. 1, CCG011001. 1, CCG004402. 1, CCG023468. 1, CCG025990. 1, CCG012980. 1, CCG000805. 1, CCG009119. 1, CCG004494. 1, CCG002364. 1, CCG015350. 1, CCG020016. 1, CCG016903. 1, CCG021948. 1, CCG011148. 1, CCG022673. 1, CCG020651. 1, CCG026159. 1, CCG009582. 1, CCG005284. 1, CCG021137. 1, CCG012584. 1, CCG016381. 1, CCG011727. 1, CCG028426. 1, CCG017001. 1, CCG024788. 1, CCG007263. 1, CCG021767. 1, CCG004907. 1, CCG021045. 1, CCG021759. 1, CCG007336. 1, CCG022772. 1, CCG010136. 1, CCG022628. 1, CCG005501. 1, CCG003310. 1, CCG024570. 2, CCG004534. 1, CCG013617. 1, CCG022513. 2, CCG018650. 1, CCG010137. 1, CCG027407. 4, CCG001361. 1, CCG026258. 1, CCG007902. 1, CCG023486. 1, CCG024232. 1, CCG006133. 1, CCG009461. 1, CCG005594. 1, CCG014772. 1, CCG008816. 1, CCG024804. 1, CCG008496. 1, CCG026464. 1, CCG004332. 1, CCG011015. 1, CCG026493. 1, CCG008498. 1, CCG027703. 1, CCG008126. 1, CCG000073. 1, CCG005070. 1, CCG005241. 1, CCG013722. 1, CCG008752. 1, CCG010906. 1, CCG008044. 1, CCG017906. 1, CCG010138. 1, CCG026312. 2, CCG021639. 1, CCG013159. 1, CCG010915. 1, CCG013054. 1, |
|------------|-----------------------|-------------------------|---------------------------|---|-------------------------------------------------------------------------------------------------------------------------------------------------------------------------------------------------------------------------------------------------------------------------------------------------------------------------------------------------------------------------------------------------------------------------------------------------------------------------------------------------------------------------------------------------------------------------------------------------------------------------------------------------------------------------------------------------------------------------------------------------------------------------------------------------------------------------------------------------------------------------------------------------------------------------------------------------------------------------------------------------------------------------------------------------------------------------------------------------------------------------------------------------------------------------------------------------------------------------------------------------------------------------------------------------------------------------------------------------------------------------------------------------------------------------------------------------------------------------------------------------------------------------------------------------------------------------------------------------------------------------------------------------------------------------------------------------------------------------------------------------------------------------------------------------------------------------------------------------------------------------------------------------------------------------------------------------------------------|

|            |             |                         |                            |   |                                                                                                                                                                                                                                                                                                                                                                                                                                                                                                                                                                                                                                                                                                                                                                                                                                                                                                                                                                                                                                                                                                                                                                                                                                                                                                                                                                                                                                                                                                                                                                                                                                                                                                                                                                                                                                                                                                                                                                   |
|------------|-------------|-------------------------|----------------------------|---|-------------------------------------------------------------------------------------------------------------------------------------------------------------------------------------------------------------------------------------------------------------------------------------------------------------------------------------------------------------------------------------------------------------------------------------------------------------------------------------------------------------------------------------------------------------------------------------------------------------------------------------------------------------------------------------------------------------------------------------------------------------------------------------------------------------------------------------------------------------------------------------------------------------------------------------------------------------------------------------------------------------------------------------------------------------------------------------------------------------------------------------------------------------------------------------------------------------------------------------------------------------------------------------------------------------------------------------------------------------------------------------------------------------------------------------------------------------------------------------------------------------------------------------------------------------------------------------------------------------------------------------------------------------------------------------------------------------------------------------------------------------------------------------------------------------------------------------------------------------------------------------------------------------------------------------------------------------------|
| GO:0006508 | proteolysis | 393 of 4104 in the list | 1011 of 8404 in the genome | 1 | CCG011990. 4, CCG006922. 1, CCG027068. 1, CCG005931. 1, CCG023235. 1, CCG006912. 1, CCG015867. 1, CCG025135. 1, CCG028016. 1, CCG001867. 2, CCG022635. 1, CCG019308. 1, CCG009900. 1, CCG006875. 2, CCG013184. 1, CCG002634. 1, CCG007993. 1, CCG017289. 1, CCG026413. 3, CCG006911. 1, CCG013012. 1, CCG027145. 1, CCG001168. 1, CCG024631. 1, CCG021509. 1, CCG016336. 1, CCG025122. 1, CCG005323. 1, CCG026069. 1, CCG025069. 2, CCG003767. 1, CCG013876. 1, CCG024294. 1, CCG014686. 1, CCG003624. 1, CCG007116. 1, CCG019415. 1, CCG016105. 1, CCG005930. 1, CCG020562. 1, CCG011238. 1, CCG009690. 1, CCG005125. 1, CCG027940. 1, CCG019571. 1, CCG000812. 1, CCG000602. 1, CCG023576. 1, CCG001877. 1, CCG004331. 1, CCG017233. 1, CCG027114. 1, CCG019188. 1, CCG022996. 1, CCG015897. 1, CCG001214. 1, CCG002163. 1, CCG017549. 1, CCG026384. 1, CCG022225. 1, CCG017305. 1, CCG028590. 1, CCG001921. 1, CCG023196. 1, CCG008004. 1, CCG017570. 1, CCG018585. 3, CCG007467. 1, CCG008341. 1, CCG000320. 1, CCG014385. 1, CCG003203. 1, CCG012955. 1, CCG022226. 1, CCG013119. 1, CCG022994. 1, CCG005089. 1, CCG022742. 2, CCG012191. 1, CCG007823. 1, CCG019323. 1, CCG012023. 1, CCG024254. 1, CCG003608. 1, CCG012957. 1, CCG023502. 1, CCG027763. 1, CCG010001. 1, CCG003421. 1, CCG000785. 1, CCG009382. 1, CCG006666. 1, CCG024865. 1, CCG003060. 1, CCG004293. 1, CCG013182. 1, CCG024659. 1, CCG018098. 1, CCG018968. 1, CCG011044. 1, CCG001704. 1, CCG027993. 1, CCG001350. 1, CCG001289. 1, CCG018206. 1, CCG008099. 1, CCG015991. 1, CCG005501. 1, CCG019599. 1, CCG006174. 1, CCG004919. 1, CCG020179. 1, CCG025915. 1, CCG014045. 1, CCG021356. 1, CCG004986. 1, CCG027989. 1, CCG015543. 1, CCG019831. 2, CCG003007. 1, CCG020231. 1, CCG002834. 1, CCG019643. 1, CCG021825. 3, CCG011426. 1, CCG027000. 1, CCG022871. 1, CCG010842. 1, CCG025503. 1, CCG002386. 1, CCG015896. 1, CCG015844. 1, CCG016863. 1, CCG005200. 1, CCG023684. 1, |
|------------|-------------|-------------------------|----------------------------|---|-------------------------------------------------------------------------------------------------------------------------------------------------------------------------------------------------------------------------------------------------------------------------------------------------------------------------------------------------------------------------------------------------------------------------------------------------------------------------------------------------------------------------------------------------------------------------------------------------------------------------------------------------------------------------------------------------------------------------------------------------------------------------------------------------------------------------------------------------------------------------------------------------------------------------------------------------------------------------------------------------------------------------------------------------------------------------------------------------------------------------------------------------------------------------------------------------------------------------------------------------------------------------------------------------------------------------------------------------------------------------------------------------------------------------------------------------------------------------------------------------------------------------------------------------------------------------------------------------------------------------------------------------------------------------------------------------------------------------------------------------------------------------------------------------------------------------------------------------------------------------------------------------------------------------------------------------------------------|
