# Supplementary material
Source: PubMed Central journal article supplement (PMC4640774)
Supplement: pnas.1516410112.sd029.pdf [file pnas.1516410112.sd029.pdf]

Table S7.7. Full list of Molecular Function Gene Ontology categories enriched in sex-biased genes (terms from the Function Ontology with p-value ≤ 1).

| GOID       | Gene Ontology term | Cluster frequency        | Genome frequency of use     | Corrected P-value | Genes annotated to the term                                                                                                                                                                                                                                                                                                                                                                                                                                                                                                                                                                                                                                                                                                                                                                                                                                                                                                                                                                                                                                                                                                                                                                                                                                                                                                                                                                                                                                                                                                                                                                                                                                                                                              |
|------------|--------------------|--------------------------|-----------------------------|-------------------|--------------------------------------------------------------------------------------------------------------------------------------------------------------------------------------------------------------------------------------------------------------------------------------------------------------------------------------------------------------------------------------------------------------------------------------------------------------------------------------------------------------------------------------------------------------------------------------------------------------------------------------------------------------------------------------------------------------------------------------------------------------------------------------------------------------------------------------------------------------------------------------------------------------------------------------------------------------------------------------------------------------------------------------------------------------------------------------------------------------------------------------------------------------------------------------------------------------------------------------------------------------------------------------------------------------------------------------------------------------------------------------------------------------------------------------------------------------------------------------------------------------------------------------------------------------------------------------------------------------------------------------------------------------------------------------------------------------------------|
| GO:0043167 | ion binding        | 2671 of 6765 in the list | 4372 of 12752 in the genome | 5.08E-37          | CCG017420.1,CCG014041.1,CCG004973.1,CCG004887.1,CCG027509.1,CCG022186.1,CCG015641.1,CCG007306.1,CCG016952.1,CCG016913.1,CCG027802.1,CCG028016.1,CCG004468.1,CCG013301.1,CCG009839.1,CCG013059.1,CCG025836.1,CCG012949.1,CCG027906.1,CCG017266.1,CCG025208.1,CCG021479.1,CCG023723.1,CCG006992.1,CCG023381.1,CCG019231.1,CCG021616.1,CCG027734.1,CCG021911.1,CCG022281.1,CCG004819.1,CCG017622.1,CCG015625.1,CCG021110.1,CCG027473.1,CCG019521.1,CCG026795.1,CCG007005.1,CCG003639.1,CCG013109.1,CCG002461.1,CCG006465.1,CCG022706.1,CCG026487.1,CCG017366.1,CCG002452.1,CCG002982.1,CCG016933.1,CCG004859.1,CCG009263.1,CCG021159.1,CCG001579.1,CCG013641.1,CCG006089.1,CCG011477.1,CCG003049.1,CCG007467.1,CCG002923.2,CCG000911.1,CCG022056.1,CCG001876.1,CCG012275.1,CCG026947.1,CCG024200.1,CCG008902.1,CCG023458.1,CCG025096.1,CCG006273.1,CCG024865.1,CCG006928.1,CCG019942.1,CCG003898.4,CCG019844.1,CCG021426.1,CCG028556.1,CCG012844.1,CCG019635.1,CCG008404.1,CCG022449.1,CCG025339.1,CCG023854.1,CCG022370.1,CCG016347.1,CCG000487.1,CCG004055.1,CCG007729.1,CCG006761.1,CCG007523.1,CCG004986.1,CCG007750.2,CCG025707.1,CCG028092.1,CCG010656.1,CCG012500.1,CCG005627.1,CCG007395.1,CCG012351.1,CCG021990.1,CCG026778.1,CCG008383.1,CCG027000.1,CCG006804.1,CCG013123.1,CCG014205.1,CCG027456.1,CCG017891.1,CCG020320.1,CCG006081.1,CCG023046.1,CCG015167.1,CCG010865.1,CCG025582.1,CCG021720.1,CCG012959.1,CCG000612.1,CCG025897.1,CCG004647.1,CCG010046.1,CCG010262.1,CCG006050.2,CCG025369.1,CCG009923.1,CCG015800.2,CCG006921.1,CCG003775.1,CCG005635.1,CCG012666.1,CCG018558.1,CCG006193.1,CCG006572.1,CCG016977.1,CCG013491.1,CCG022749.1,CCG004912.1,CCG003955.1,CCG018772.1,CCG024058.1,CCG007724.1, |

|            |                  |                          |                             |          |                                                                                                                                                                                                                                                                                                                                                                                                                                                                                                                                                                                                                                                                                                                                                                                                                                                                                                                                                                                                                                                                                                                                                                                                                                                                                                                                                                                                                                                                                                                                                                                                                                                                                                                          |
|------------|------------------|--------------------------|-----------------------------|----------|--------------------------------------------------------------------------------------------------------------------------------------------------------------------------------------------------------------------------------------------------------------------------------------------------------------------------------------------------------------------------------------------------------------------------------------------------------------------------------------------------------------------------------------------------------------------------------------------------------------------------------------------------------------------------------------------------------------------------------------------------------------------------------------------------------------------------------------------------------------------------------------------------------------------------------------------------------------------------------------------------------------------------------------------------------------------------------------------------------------------------------------------------------------------------------------------------------------------------------------------------------------------------------------------------------------------------------------------------------------------------------------------------------------------------------------------------------------------------------------------------------------------------------------------------------------------------------------------------------------------------------------------------------------------------------------------------------------------------|
| GO:0008270 | zinc ion binding | 1378 of 6765 in the list | 2096 of 12752 in the genome | 4.35E-35 | CCG005655.1,CCG014041.1,CCG014871.1,CCG027509.1,CCG022186.1,CCG015641.1,CCG007306.1,CCG019811.1,CCG028016.1,CCG025256.1,CCG004468.1,CCG007365.1,CCG011568.1,CCG012015.1,CCG013059.1,CCG025836.1,CCG001404.1,CCG026360.1,CCG027906.1,CCG006332.1,CCG014866.1,CCG004932.1,CCG023723.1,CCG006992.1,CCG003766.1,CCG017289.1,CCG027127.1,CCG019231.1,CCG009103.1,CCG014944.1,CCG027193.1,CCG004853.1,CCG022281.1,CCG004819.1,CCG006554.2,CCG017622.1,CCG015625.1,CCG025556.1,CCG027473.1,CCG026795.1,CCG007005.1,CCG004132.1,CCG006153.1,CCG006100.1,CCG020064.1,CCG026982.1,CCG002461.1,CCG022706.1,CCG009735.1,CCG011231.2,CCG026487.1,CCG017366.1,CCG002452.1,CCG004859.1,CCG024437.1,CCG009263.1,CCG005913.1,CCG021159.1,CCG009386.1,CCG021780.1,CCG006089.1,CCG011239.1,CCG011477.1,CCG027463.1,CCG009863.1,CCG007467.1,CCG000775.1,CCG001827.1,CCG014385.1,CCG000911.1,CCG022056.1,CCG009951.1,CCG026947.1,CCG024200.1,CCG023502.1,CCG020063.1,CCG025255.1,CCG003193.1,CCG024865.1,CCG019942.1,CCG003898.4,CCG021426.1,CCG015431.1,CCG019116.3,CCG028556.1,CCG012844.1,CCG019635.1,CCG022449.1,CCG025339.1,CCG018724.1,CCG023854.1,CCG022370.1,CCG010863.1,CCG000487.1,CCG006761.1,CCG007523.1,CCG007750.2,CCG009599.1,CCG010656.1,CCG010506.1,CCG012500.1,CCG005627.1,CCG012351.1,CCG018669.1,CCG026778.1,CCG004864.1,CCG008383.1,CCG005879.1,CCG027000.1,CCG025551.2,CCG005244.1,CCG002106.1,CCG018168.1,CCG000109.1,CCG005992.1,CCG013123.1,CCG023657.1,CCG008142.1,CCG007522.1,CCG017891.1,CCG000374.1,CCG020320.1,CCG006081.1,CCG023046.1,CCG010865.1,CCG014213.1,CCG021720.1,CCG005951.1,CCG002332.1,CCG005993.1,CCG025115.1,CCG004647.1,CCG012587.1,CCG025369.1,CCG009923.1,CCG017184.1,CCG005820.1,CCG015800.2, |
|------------|------------------|--------------------------|-----------------------------|----------|--------------------------------------------------------------------------------------------------------------------------------------------------------------------------------------------------------------------------------------------------------------------------------------------------------------------------------------------------------------------------------------------------------------------------------------------------------------------------------------------------------------------------------------------------------------------------------------------------------------------------------------------------------------------------------------------------------------------------------------------------------------------------------------------------------------------------------------------------------------------------------------------------------------------------------------------------------------------------------------------------------------------------------------------------------------------------------------------------------------------------------------------------------------------------------------------------------------------------------------------------------------------------------------------------------------------------------------------------------------------------------------------------------------------------------------------------------------------------------------------------------------------------------------------------------------------------------------------------------------------------------------------------------------------------------------------------------------------------|

|            |                              |                          |                             |          |                                                                                                                                                                                                                                                                                                                                                                                                                                                                                                                                                                                                                                                                                                                                                                                                                                                                                                                                                                                                                                                                                                                                                                                                                                                                                                                                                                                                                                                                                                                                                                                                                                                                                                                          |
|------------|------------------------------|--------------------------|-----------------------------|----------|--------------------------------------------------------------------------------------------------------------------------------------------------------------------------------------------------------------------------------------------------------------------------------------------------------------------------------------------------------------------------------------------------------------------------------------------------------------------------------------------------------------------------------------------------------------------------------------------------------------------------------------------------------------------------------------------------------------------------------------------------------------------------------------------------------------------------------------------------------------------------------------------------------------------------------------------------------------------------------------------------------------------------------------------------------------------------------------------------------------------------------------------------------------------------------------------------------------------------------------------------------------------------------------------------------------------------------------------------------------------------------------------------------------------------------------------------------------------------------------------------------------------------------------------------------------------------------------------------------------------------------------------------------------------------------------------------------------------------|
| GO:0046914 | transition metal ion binding | 1551 of 6765 in the list | 2480 of 12752 in the genome | 1.32E-23 | CCG005655.1,CCG014041.1,CCG014871.1,CCG027509.1,CCG022186.1,CCG015641.1,CCG007306.1,CCG019811.1,CCG028016.1,CCG025256.1,CCG004468.1,CCG007365.1,CCG011568.1,CCG012015.1,CCG013059.1,CCG025836.1,CCG001404.1,CCG026360.1,CCG012949.1,CCG027906.1,CCG006332.1,CCG014866.1,CCG004932.1,CCG023723.1,CCG006992.1,CCG003766.1,CCG017289.1,CCG027127.1,CCG019231.1,CCG009103.1,CCG014944.1,CCG027193.1,CCG004853.1,CCG022281.1,CCG004819.1,CCG006554.2,CCG017622.1,CCG015625.1,CCG025556.1,CCG027473.1,CCG026795.1,CCG007005.1,CCG004132.1,CCG006153.1,CCG006100.1,CCG020064.1,CCG026982.1,CCG002461.1,CCG022706.1,CCG009735.1,CCG011231.2,CCG026487.1,CCG017366.1,CCG002452.1,CCG004859.1,CCG024437.1,CCG009263.1,CCG005913.1,CCG021159.1,CCG012339.1,CCG009386.1,CCG021780.1,CCG006089.1,CCG011239.1,CCG011477.1,CCG027463.1,CCG009863.1,CCG007467.1,CCG000775.1,CCG001827.1,CCG014385.1,CCG000911.1,CCG022056.1,CCG009951.1,CCG026947.1,CCG024200.1,CCG023502.1,CCG020063.1,CCG025255.1,CCG003193.1,CCG024865.1,CCG019942.1,CCG003898.4,CCG019844.1,CCG021426.1,CCG015431.1,CCG019116.3,CCG028556.1,CCG012844.1,CCG019635.1,CCG022449.1,CCG025339.1,CCG018724.1,CCG023854.1,CCG022370.1,CCG010863.1,CCG000487.1,CCG007729.1,CCG006761.1,CCG007523.1,CCG004986.1,CCG007750.2,CCG009599.1,CCG010656.1,CCG010506.1,CCG012500.1,CCG005627.1,CCG007395.1,CCG012351.1,CCG018669.1,CCG005594.1,CCG026778.1,CCG004864.1,CCG008383.1,CCG005879.1,CCG027000.1,CCG025551.2,CCG005244.1,CCG002106.1,CCG018168.1,CCG000109.1,CCG005992.1,CCG013123.1,CCG023657.1,CCG008142.1,CCG007522.1,CCG017891.1,CCG000374.1,CCG020320.1,CCG006081.1,CCG023046.1,CCG010865.1,CCG014213.1,CCG021720.1,CCG005951.1,CCG002332.1,CCG005993.1,CCG025115.1, |
|------------|------------------------------|--------------------------|-----------------------------|----------|--------------------------------------------------------------------------------------------------------------------------------------------------------------------------------------------------------------------------------------------------------------------------------------------------------------------------------------------------------------------------------------------------------------------------------------------------------------------------------------------------------------------------------------------------------------------------------------------------------------------------------------------------------------------------------------------------------------------------------------------------------------------------------------------------------------------------------------------------------------------------------------------------------------------------------------------------------------------------------------------------------------------------------------------------------------------------------------------------------------------------------------------------------------------------------------------------------------------------------------------------------------------------------------------------------------------------------------------------------------------------------------------------------------------------------------------------------------------------------------------------------------------------------------------------------------------------------------------------------------------------------------------------------------------------------------------------------------------------|

|            |                   |                          |                             |          |                                                                                                                                                                                                                                                                                                                                                                                                                                                                                                                                                                                                                                                                                                                                                                                                                                                                                                                                                                                                                                                                                                                                                                                                                                                                                                                                                                                                                                                                                                                                                                                                                                                                                                                          |
|------------|-------------------|--------------------------|-----------------------------|----------|--------------------------------------------------------------------------------------------------------------------------------------------------------------------------------------------------------------------------------------------------------------------------------------------------------------------------------------------------------------------------------------------------------------------------------------------------------------------------------------------------------------------------------------------------------------------------------------------------------------------------------------------------------------------------------------------------------------------------------------------------------------------------------------------------------------------------------------------------------------------------------------------------------------------------------------------------------------------------------------------------------------------------------------------------------------------------------------------------------------------------------------------------------------------------------------------------------------------------------------------------------------------------------------------------------------------------------------------------------------------------------------------------------------------------------------------------------------------------------------------------------------------------------------------------------------------------------------------------------------------------------------------------------------------------------------------------------------------------|
| GO:0046872 | metal ion binding | 1721 of 6765 in the list | 2814 of 12752 in the genome | 5.17E-20 | CCG005655.1,CCG014041.1,CCG014871.1,CCG027509.1,CCG022186.1,CCG015641.1,CCG007306.1,CCG019811.1,CCG028016.1,CCG025256.1,CCG004468.1,CCG007365.1,CCG011568.1,CCG013301.1,CCG012015.1,CCG013059.1,CCG025836.1,CCG001404.1,CCG026360.1,CCG012949.1,CCG027906.1,CCG006332.1,CCG014866.1,CCG004932.1,CCG023723.1,CCG006992.1,CCG007810.2,CCG003766.1,CCG017289.1,CCG027127.1,CCG019231.1,CCG009103.1,CCG014944.1,CCG027193.1,CCG004853.1,CCG022281.1,CCG004819.1,CCG006554.2,CCG017622.1,CCG015625.1,CCG025556.1,CCG027473.1,CCG026795.1,CCG007005.1,CCG004132.1,CCG006153.1,CCG006100.1,CCG020064.1,CCG026982.1,CCG002461.1,CCG022706.1,CCG009735.1,CCG011231.2,CCG026487.1,CCG017366.1,CCG002452.1,CCG004859.1,CCG024437.1,CCG009263.1,CCG005913.1,CCG021159.1,CCG012339.1,CCG009386.1,CCG021780.1,CCG008135.1,CCG006089.1,CCG011239.1,CCG011477.1,CCG027463.1,CCG009863.1,CCG007467.1,CCG000775.1,CCG001827.1,CCG014385.1,CCG000911.1,CCG022056.1,CCG009951.1,CCG012275.1,CCG026947.1,CCG024200.1,CCG023502.1,CCG020063.1,CCG025096.1,CCG025255.1,CCG003193.1,CCG024865.1,CCG019942.1,CCG003898.4,CCG019844.1,CCG021426.1,CCG015431.1,CCG019116.3,CCG028556.1,CCG012844.1,CCG019635.1,CCG007356.1,CCG022449.1,CCG025339.1,CCG000391.1,CCG018724.1,CCG023854.1,CCG022370.1,CCG010863.1,CCG000487.1,CCG007729.1,CCG006761.1,CCG007523.1,CCG004986.1,CCG007750.2,CCG009599.1,CCG010656.1,CCG014760.1,CCG010506.1,CCG012500.1,CCG005627.1,CCG007395.1,CCG019884.1,CCG012351.1,CCG021990.1,CCG018669.1,CCG005594.1,CCG026778.1,CCG004864.1,CCG008383.1,CCG005879.1,CCG006313.1,CCG027000.1,CCG025551.2,CCG005244.1,CCG002106.1,CCG018168.1,CCG011172.1,CCG000109.1,CCG005992.1,CCG013123.1,CCG023657.1,CCG008142.1,CCG007522.1, |
|------------|-------------------|--------------------------|-----------------------------|----------|--------------------------------------------------------------------------------------------------------------------------------------------------------------------------------------------------------------------------------------------------------------------------------------------------------------------------------------------------------------------------------------------------------------------------------------------------------------------------------------------------------------------------------------------------------------------------------------------------------------------------------------------------------------------------------------------------------------------------------------------------------------------------------------------------------------------------------------------------------------------------------------------------------------------------------------------------------------------------------------------------------------------------------------------------------------------------------------------------------------------------------------------------------------------------------------------------------------------------------------------------------------------------------------------------------------------------------------------------------------------------------------------------------------------------------------------------------------------------------------------------------------------------------------------------------------------------------------------------------------------------------------------------------------------------------------------------------------------------|

|            |                |                          |                             |          |                                                                                                                                                                                                                                                                                                                                                                                                                                                                                                                                                                                                                                                                                                                                                                                                                                                                                                                                                                                                                                                                                                                                                                                                                                                                                                                                                                                                                                                                                                                                                                                                                                                                                                                          |
|------------|----------------|--------------------------|-----------------------------|----------|--------------------------------------------------------------------------------------------------------------------------------------------------------------------------------------------------------------------------------------------------------------------------------------------------------------------------------------------------------------------------------------------------------------------------------------------------------------------------------------------------------------------------------------------------------------------------------------------------------------------------------------------------------------------------------------------------------------------------------------------------------------------------------------------------------------------------------------------------------------------------------------------------------------------------------------------------------------------------------------------------------------------------------------------------------------------------------------------------------------------------------------------------------------------------------------------------------------------------------------------------------------------------------------------------------------------------------------------------------------------------------------------------------------------------------------------------------------------------------------------------------------------------------------------------------------------------------------------------------------------------------------------------------------------------------------------------------------------------|
| GO:0043169 | cation binding | 1740 of 6765 in the list | 2851 of 12752 in the genome | 1.06E-19 | CCG005655.1,CCG014041.1,CCG014871.1,CCG027509.1,CCG022186.1,CCG015641.1,CCG007306.1,CCG019811.1,CCG028016.1,CCG025256.1,CCG004468.1,CCG007365.1,CCG011568.1,CCG013301.1,CCG012015.1,CCG013059.1,CCG025836.1,CCG001404.1,CCG026360.1,CCG012949.1,CCG027906.1,CCG006332.1,CCG014866.1,CCG004932.1,CCG023723.1,CCG006992.1,CCG007810.2,CCG003766.1,CCG017289.1,CCG027127.1,CCG019231.1,CCG009103.1,CCG014944.1,CCG027193.1,CCG004853.1,CCG019874.1,CCG022281.1,CCG004819.1,CCG006554.2,CCG017622.1,CCG015625.1,CCG025556.1,CCG027473.1,CCG026795.1,CCG007005.1,CCG004132.1,CCG006153.1,CCG006100.1,CCG020064.1,CCG026982.1,CCG002461.1,CCG022706.1,CCG009735.1,CCG011231.2,CCG026487.1,CCG017366.1,CCG002452.1,CCG004859.1,CCG024437.1,CCG009263.1,CCG005913.1,CCG021159.1,CCG012339.1,CCG009386.1,CCG021780.1,CCG008135.1,CCG006089.1,CCG011239.1,CCG011477.1,CCG027463.1,CCG009863.1,CCG007467.1,CCG000775.1,CCG001827.1,CCG014385.1,CCG000911.1,CCG022056.1,CCG009951.1,CCG012275.1,CCG026947.1,CCG024200.1,CCG023502.1,CCG020063.1,CCG025096.1,CCG025255.1,CCG003193.1,CCG024865.1,CCG019942.1,CCG003898.4,CCG019844.1,CCG021426.1,CCG015431.1,CCG019116.3,CCG028556.1,CCG012844.1,CCG019635.1,CCG007356.1,CCG022449.1,CCG025339.1,CCG000391.1,CCG018724.1,CCG023854.1,CCG022370.1,CCG010863.1,CCG000487.1,CCG007729.1,CCG006761.1,CCG007523.1,CCG004986.1,CCG007750.2,CCG009599.1,CCG010656.1,CCG014760.1,CCG010506.1,CCG012500.1,CCG005627.1,CCG007395.1,CCG019884.1,CCG012351.1,CCG021990.1,CCG018669.1,CCG005594.1,CCG026778.1,CCG004864.1,CCG008383.1,CCG005879.1,CCG006313.1,CCG027000.1,CCG025551.2,CCG005244.1,CCG002106.1,CCG018168.1,CCG011172.1,CCG000109.1,CCG005992.1,CCG013123.1,CCG023657.1,CCG008142.1, |
|------------|----------------|--------------------------|-----------------------------|----------|--------------------------------------------------------------------------------------------------------------------------------------------------------------------------------------------------------------------------------------------------------------------------------------------------------------------------------------------------------------------------------------------------------------------------------------------------------------------------------------------------------------------------------------------------------------------------------------------------------------------------------------------------------------------------------------------------------------------------------------------------------------------------------------------------------------------------------------------------------------------------------------------------------------------------------------------------------------------------------------------------------------------------------------------------------------------------------------------------------------------------------------------------------------------------------------------------------------------------------------------------------------------------------------------------------------------------------------------------------------------------------------------------------------------------------------------------------------------------------------------------------------------------------------------------------------------------------------------------------------------------------------------------------------------------------------------------------------------------|

|            |         |                          |                             |          |                                                                                                                                                                                                                                                                                                                                                                                                                                                                                                                                                                                                                                                                                                                                                                                                                                                                                                                                                                                                                                                                                                                                                                                                                                                                                                                                                                                                                                                                                                                                                                                                                                                                                                                          |
|------------|---------|--------------------------|-----------------------------|----------|--------------------------------------------------------------------------------------------------------------------------------------------------------------------------------------------------------------------------------------------------------------------------------------------------------------------------------------------------------------------------------------------------------------------------------------------------------------------------------------------------------------------------------------------------------------------------------------------------------------------------------------------------------------------------------------------------------------------------------------------------------------------------------------------------------------------------------------------------------------------------------------------------------------------------------------------------------------------------------------------------------------------------------------------------------------------------------------------------------------------------------------------------------------------------------------------------------------------------------------------------------------------------------------------------------------------------------------------------------------------------------------------------------------------------------------------------------------------------------------------------------------------------------------------------------------------------------------------------------------------------------------------------------------------------------------------------------------------------|
| GO:0005488 | binding | 4790 of 6765 in the list | 8587 of 12752 in the genome | 3.28E-16 | CCG020201.1,CCG017420.1,CCG010101.1,CCG017415.3,CCG010869.1,CCG004973.1,CCG027509.1,CCG022186.1,CCG016913.1,CCG004839.1,CCG023989.1,CCG024240.1,CCG016259.1,CCG013001.1,CCG000039.1,CCG020406.1,CCG009839.1,CCG013059.1,CCG012949.1,CCG008966.1,CCG021479.1,CCG006992.1,CCG023381.1,CCG015101.1,CCG019231.1,CCG021616.1,CCG017622.1,CCG008270.1,CCG013537.1,CCG015625.1,CCG002184.1,CCG021110.1,CCG027473.1,CCG019521.1,CCG028653.1,CCG026795.1,CCG014850.1,CCG007005.1,CCG003639.1,CCG013109.1,CCG006465.1,CCG019571.1,CCG022706.1,CCG026487.1,CCG020864.1,CCG017366.1,CCG002982.1,CCG012083.1,CCG016933.1,CCG021159.1,CCG003791.1,CCG006089.1,CCG015350.1,CCG000133.1,CCG011477.1,CCG021948.1,CCG009766.1,CCG002474.1,CCG003049.1,CCG002923.2,CCG021137.1,CCG022056.1,CCG013610.1,CCG026947.1,CCG008902.1,CCG020663.1,CCG023458.1,CCG025096.1,CCG016602.1,CCG027357.1,CCG006273.1,CCG024865.1,CCG006928.1,CCG019844.1,CCG021426.1,CCG010912.1,CCG013640.1,CCG022496.1,CCG028556.1,CCG012844.1,CCG019635.1,CCG008404.1,CCG011498.1,CCG010136.1,CCG000385.1,CCG025339.1,CCG011144.1,CCG022370.1,CCG000487.1,CCG021503.1,CCG007750.2,CCG013939.1,CCG019831.2,CCG024358.1,CCG021093.1,CCG001395.1,CCG012500.1,CCG007395.1,CCG008383.1,CCG027000.1,CCG010346.1,CCG026242.1,CCG013123.1,CCG022548.1,CCG017891.1,CCG006081.1,CCG023046.1,CCG010865.1,CCG015167.1,CCG021720.1,CCG002118.1,CCG000612.1,CCG020881.1,CCG021072.1,CCG025897.1,CCG004647.1,CCG010262.1,CCG006050.2,CCG024052.1,CCG003775.1,CCG012666.1,CCG015908.2,CCG006193.1,CCG019299.1,CCG006572.1,CCG016977.1,CCG013491.1,CCG003955.1,CCG018772.1,CCG012229.1,CCG013298.1,CCG018742.1,CCG005920.1,CCG015312.2,CCG000490.1,CCG020724.1,CCG007676.1,CCG019520.1, |
|------------|---------|--------------------------|-----------------------------|----------|--------------------------------------------------------------------------------------------------------------------------------------------------------------------------------------------------------------------------------------------------------------------------------------------------------------------------------------------------------------------------------------------------------------------------------------------------------------------------------------------------------------------------------------------------------------------------------------------------------------------------------------------------------------------------------------------------------------------------------------------------------------------------------------------------------------------------------------------------------------------------------------------------------------------------------------------------------------------------------------------------------------------------------------------------------------------------------------------------------------------------------------------------------------------------------------------------------------------------------------------------------------------------------------------------------------------------------------------------------------------------------------------------------------------------------------------------------------------------------------------------------------------------------------------------------------------------------------------------------------------------------------------------------------------------------------------------------------------------|

|            |             |                         |                             |          |                                                                                                                                                                                                                                                                                                                                                                                                                                                                                                                                                                                                                                                                                                                                                                                                                                                                                                                                                                                                                                                                                                                                                                                                                                                                                                                                                                                                                                                                                                                                                                                                                                                                                                                           |
|------------|-------------|-------------------------|-----------------------------|----------|---------------------------------------------------------------------------------------------------------------------------------------------------------------------------------------------------------------------------------------------------------------------------------------------------------------------------------------------------------------------------------------------------------------------------------------------------------------------------------------------------------------------------------------------------------------------------------------------------------------------------------------------------------------------------------------------------------------------------------------------------------------------------------------------------------------------------------------------------------------------------------------------------------------------------------------------------------------------------------------------------------------------------------------------------------------------------------------------------------------------------------------------------------------------------------------------------------------------------------------------------------------------------------------------------------------------------------------------------------------------------------------------------------------------------------------------------------------------------------------------------------------------------------------------------------------------------------------------------------------------------------------------------------------------------------------------------------------------------|
| GO:0005524 | ATP binding | 704 of 6765 in the list | 1087 of 12752 in the genome | 1.64E-13 | CCG024345.1,CCG014396.1,CCG004973.1,CCG006549.1,CCG004887.1,CCG007349.1,CCG0003545.1,CCG010695.1,CCG009878.1,CCG007489.1,CCG016952.1,CCG016913.1,CCG014419.1,CCG026174.1,CCG007978.1,CCG019768.1,CCG013625.1,CCG005171.1,CCG016238.1,CCG009702.1,CCG015082.1,CCG021799.1,CCG009839.1,CCG006028.1,CCG024680.1,CCG018570.1,CCG026753.1,CCG017266.1,CCG028198.1,CCG016689.2,CCG025208.1,CCG021479.1,CCG023381.1,CCG019735.1,CCG008381.1,CCG021616.1,CCG027734.1,CCG002047.2,CCG024710.1,CCG021911.1,CCG018879.1,CCG004050.1,CCG008301.1,CCG020471.1,CCG021110.1,CCG022988.1,CCG003415.1,CCG017984.1,CCG019521.1,CCG018110.1,CCG027636.1,CCG004569.1,CCG020537.1,CCG024139.1,CCG024326.1,CCG008040.1,CCG020286.1,CCG013109.1,CCG027133.1,CCG010786.1,CCG011949.1,CCG006465.1,CCG003248.1,CCG018494.1,CCG020100.1,CCG002982.1,CCG016933.1,CCG001311.1,CCG010622.1,CCG003004.1,CCG019678.1,CCG017591.1,CCG024025.1,CCG007457.1,CCG016924.1,CCG012332.1,CCG002957.1,CCG020651.1,CCG024347.1,CCG005284.1,CCG002923.2,CCG005089.1,CCG019545.1,CCG010398.1,CCG001876.1,CCG015186.1,CCG016327.2,CCG026809.1,CCG007712.1,CCG018349.1,CCG001636.1,CCG028396.1,CCG023458.1,CCG027943.1,CCG003520.1,CCG001285.1,CCG006928.1,CCG016738.2,CCG022346.1,CCG003554.1,CCG015367.1,CCG000353.1,CCG011491.1,CCG008404.1,CCG018201.1,CCG008287.1,CCG021179.1,CCG001108.1,CCG001928.1,CCG010428.1,CCG004459.2,CCG016347.1,CCG004055.1,CCG009038.1,CCG025707.1,CCG028092.1,CCG018650.1,CCG021811.1,CCG024232.1,CCG010139.1,CCG023184.1,CCG018478.1,CCG022070.1,CCG024922.1,CCG008488.1,CCG010561.1,CCG015426.1,CCG025419.1,CCG006804.1,CCG025510.1,CCG014205.1,CCG024790.1,CCG026979.1,CCG027456.1,CCG004226.1,CCG009177.1,CCG015167.1,CCG008498.1, |
|------------|-------------|-------------------------|-----------------------------|----------|---------------------------------------------------------------------------------------------------------------------------------------------------------------------------------------------------------------------------------------------------------------------------------------------------------------------------------------------------------------------------------------------------------------------------------------------------------------------------------------------------------------------------------------------------------------------------------------------------------------------------------------------------------------------------------------------------------------------------------------------------------------------------------------------------------------------------------------------------------------------------------------------------------------------------------------------------------------------------------------------------------------------------------------------------------------------------------------------------------------------------------------------------------------------------------------------------------------------------------------------------------------------------------------------------------------------------------------------------------------------------------------------------------------------------------------------------------------------------------------------------------------------------------------------------------------------------------------------------------------------------------------------------------------------------------------------------------------------------|

|            |                                     |                         |                             |          |                                                                                                                                                                                                                                                                                                                                                                                                                                                                                                                                                                                                                                                                                                                                                                                                                                                                                                                                                                                                                                                                                                                                                                                                                                                                                                                                                                                                                                                                                                                                                                                                                                                                                                                           |
|------------|-------------------------------------|-------------------------|-----------------------------|----------|---------------------------------------------------------------------------------------------------------------------------------------------------------------------------------------------------------------------------------------------------------------------------------------------------------------------------------------------------------------------------------------------------------------------------------------------------------------------------------------------------------------------------------------------------------------------------------------------------------------------------------------------------------------------------------------------------------------------------------------------------------------------------------------------------------------------------------------------------------------------------------------------------------------------------------------------------------------------------------------------------------------------------------------------------------------------------------------------------------------------------------------------------------------------------------------------------------------------------------------------------------------------------------------------------------------------------------------------------------------------------------------------------------------------------------------------------------------------------------------------------------------------------------------------------------------------------------------------------------------------------------------------------------------------------------------------------------------------------|
| GO:0032559 | adenyl<br>ribonucleotide<br>binding | 705 of 6765 in the list | 1091 of 12752 in the genome | 3.35E-13 | CCG024345.1,CCG014396.1,CCG004973.1,CCG006549.1,CCG004887.1,CCG007349.1,CCG0003545.1,CCG010695.1,CCG009878.1,CCG007489.1,CCG016952.1,CCG016913.1,CCG014419.1,CCG026174.1,CCG007978.1,CCG019768.1,CCG013625.1,CCG005171.1,CCG016238.1,CCG009702.1,CCG015082.1,CCG021799.1,CCG009839.1,CCG006028.1,CCG024680.1,CCG018570.1,CCG026753.1,CCG017266.1,CCG028198.1,CCG016689.2,CCG025208.1,CCG021479.1,CCG023381.1,CCG019735.1,CCG008381.1,CCG021616.1,CCG027734.1,CCG002047.2,CCG024710.1,CCG021911.1,CCG018879.1,CCG004050.1,CCG008301.1,CCG020471.1,CCG021110.1,CCG022988.1,CCG003415.1,CCG017984.1,CCG019521.1,CCG018110.1,CCG027636.1,CCG004569.1,CCG020537.1,CCG024139.1,CCG024326.1,CCG008040.1,CCG020286.1,CCG013109.1,CCG027133.1,CCG010786.1,CCG011949.1,CCG006465.1,CCG003248.1,CCG018494.1,CCG020100.1,CCG002982.1,CCG016933.1,CCG001311.1,CCG010622.1,CCG003004.1,CCG019678.1,CCG017591.1,CCG024025.1,CCG007457.1,CCG016924.1,CCG012332.1,CCG002957.1,CCG020651.1,CCG024347.1,CCG005284.1,CCG002923.2,CCG005089.1,CCG019545.1,CCG010398.1,CCG001876.1,CCG015186.1,CCG016327.2,CCG026809.1,CCG007712.1,CCG018349.1,CCG001636.1,CCG028396.1,CCG023458.1,CCG027943.1,CCG003520.1,CCG001285.1,CCG006928.1,CCG016738.2,CCG022346.1,CCG003554.1,CCG015367.1,CCG000353.1,CCG011491.1,CCG008404.1,CCG018201.1,CCG008287.1,CCG021179.1,CCG001108.1,CCG001928.1,CCG010428.1,CCG004459.2,CCG016347.1,CCG004055.1,CCG009038.1,CCG025707.1,CCG028092.1,CCG018650.1,CCG021811.1,CCG024232.1,CCG010139.1,CCG023184.1,CCG018478.1,CCG022070.1,CCG024922.1,CCG008488.1,CCG010561.1,CCG015426.1,CCG025419.1,CCG006804.1,CCG025510.1,CCG014205.1,CCG024790.1,CCG026979.1,CCG027456.1,CCG004226.1,CCG009177.1,CCG015167.1,CCG008498.1, |
|------------|-------------------------------------|-------------------------|-----------------------------|----------|---------------------------------------------------------------------------------------------------------------------------------------------------------------------------------------------------------------------------------------------------------------------------------------------------------------------------------------------------------------------------------------------------------------------------------------------------------------------------------------------------------------------------------------------------------------------------------------------------------------------------------------------------------------------------------------------------------------------------------------------------------------------------------------------------------------------------------------------------------------------------------------------------------------------------------------------------------------------------------------------------------------------------------------------------------------------------------------------------------------------------------------------------------------------------------------------------------------------------------------------------------------------------------------------------------------------------------------------------------------------------------------------------------------------------------------------------------------------------------------------------------------------------------------------------------------------------------------------------------------------------------------------------------------------------------------------------------------------------|

|            |                           |                         |                             |          |                                                                                                                                                                                                                                                                                                                                                                                                                                                                                                                                                                                                                                                                                                                                                                                                                                                                                                                                                                                                                                                                                                                                                                                                                                                                                                                                                                                                                                                                                                                                                                                                                                                                                                                           |
|------------|---------------------------|-------------------------|-----------------------------|----------|---------------------------------------------------------------------------------------------------------------------------------------------------------------------------------------------------------------------------------------------------------------------------------------------------------------------------------------------------------------------------------------------------------------------------------------------------------------------------------------------------------------------------------------------------------------------------------------------------------------------------------------------------------------------------------------------------------------------------------------------------------------------------------------------------------------------------------------------------------------------------------------------------------------------------------------------------------------------------------------------------------------------------------------------------------------------------------------------------------------------------------------------------------------------------------------------------------------------------------------------------------------------------------------------------------------------------------------------------------------------------------------------------------------------------------------------------------------------------------------------------------------------------------------------------------------------------------------------------------------------------------------------------------------------------------------------------------------------------|
| GO:0030554 | adenyl nucleotide binding | 706 of 6765 in the list | 1093 of 12752 in the genome | 3.66E-13 | CCG024345.1,CCG014396.1,CCG004973.1,CCG006549.1,CCG004887.1,CCG007349.1,CCG0003545.1,CCG010695.1,CCG009878.1,CCG007489.1,CCG016952.1,CCG016913.1,CCG014419.1,CCG026174.1,CCG007978.1,CCG019768.1,CCG013625.1,CCG005171.1,CCG016238.1,CCG009702.1,CCG015082.1,CCG021799.1,CCG009839.1,CCG006028.1,CCG024680.1,CCG018570.1,CCG026753.1,CCG017266.1,CCG028198.1,CCG016689.2,CCG025208.1,CCG021479.1,CCG023381.1,CCG019735.1,CCG008381.1,CCG021616.1,CCG027734.1,CCG002047.2,CCG024710.1,CCG021911.1,CCG018879.1,CCG004050.1,CCG008301.1,CCG020471.1,CCG021110.1,CCG022988.1,CCG003415.1,CCG017984.1,CCG019521.1,CCG018110.1,CCG027636.1,CCG004569.1,CCG020537.1,CCG024139.1,CCG024326.1,CCG008040.1,CCG020286.1,CCG013109.1,CCG027133.1,CCG010786.1,CCG011949.1,CCG006465.1,CCG003248.1,CCG018494.1,CCG020100.1,CCG002982.1,CCG016933.1,CCG001311.1,CCG010622.1,CCG003004.1,CCG019678.1,CCG017591.1,CCG024025.1,CCG007457.1,CCG016924.1,CCG012332.1,CCG002957.1,CCG020651.1,CCG024347.1,CCG005284.1,CCG002923.2,CCG005089.1,CCG019545.1,CCG010398.1,CCG001876.1,CCG015186.1,CCG016327.2,CCG026809.1,CCG007712.1,CCG018349.1,CCG001636.1,CCG028396.1,CCG023458.1,CCG027943.1,CCG003520.1,CCG001285.1,CCG006928.1,CCG016738.2,CCG022346.1,CCG003554.1,CCG015367.1,CCG000353.1,CCG011491.1,CCG008404.1,CCG018201.1,CCG008287.1,CCG021179.1,CCG001108.1,CCG001928.1,CCG010428.1,CCG004459.2,CCG016347.1,CCG004055.1,CCG009038.1,CCG025707.1,CCG028092.1,CCG018650.1,CCG021811.1,CCG024232.1,CCG010139.1,CCG023184.1,CCG018478.1,CCG022070.1,CCG024922.1,CCG008488.1,CCG010561.1,CCG015426.1,CCG025419.1,CCG006804.1,CCG025510.1,CCG014205.1,CCG024790.1,CCG026979.1,CCG027456.1,CCG004226.1,CCG009177.1,CCG015167.1,CCG008498.1, |
|------------|---------------------------|-------------------------|-----------------------------|----------|---------------------------------------------------------------------------------------------------------------------------------------------------------------------------------------------------------------------------------------------------------------------------------------------------------------------------------------------------------------------------------------------------------------------------------------------------------------------------------------------------------------------------------------------------------------------------------------------------------------------------------------------------------------------------------------------------------------------------------------------------------------------------------------------------------------------------------------------------------------------------------------------------------------------------------------------------------------------------------------------------------------------------------------------------------------------------------------------------------------------------------------------------------------------------------------------------------------------------------------------------------------------------------------------------------------------------------------------------------------------------------------------------------------------------------------------------------------------------------------------------------------------------------------------------------------------------------------------------------------------------------------------------------------------------------------------------------------------------|

|            |                    |                         |                             |          |                                                                                                                                                                                                                                                                                                                                                                                                                                                                                                                                                                                                                                                                                                                                                                                                                                                                                                                                                                                                                                                                                                                                                                                                                                                                                                                                                                                                                                                                                                                                                                                                                                                                                                                          |
|------------|--------------------|-------------------------|-----------------------------|----------|--------------------------------------------------------------------------------------------------------------------------------------------------------------------------------------------------------------------------------------------------------------------------------------------------------------------------------------------------------------------------------------------------------------------------------------------------------------------------------------------------------------------------------------------------------------------------------------------------------------------------------------------------------------------------------------------------------------------------------------------------------------------------------------------------------------------------------------------------------------------------------------------------------------------------------------------------------------------------------------------------------------------------------------------------------------------------------------------------------------------------------------------------------------------------------------------------------------------------------------------------------------------------------------------------------------------------------------------------------------------------------------------------------------------------------------------------------------------------------------------------------------------------------------------------------------------------------------------------------------------------------------------------------------------------------------------------------------------------|
| GO:0001882 | nucleoside binding | 834 of 6765 in the list | 1340 of 12752 in the genome | 3.66E-10 | CCG017420.1,CCG024345.1,CCG014396.1,CCG004973.1,CCG006549.1,CCG004887.1,CCG007349.1,CCG003545.1,CCG010695.1,CCG009878.1,CCG005370.1,CCG007489.1,CCG016952.1,CCG016913.1,CCG014419.1,CCG027802.1,CCG026174.1,CCG007978.1,CCG019768.1,CCG013625.1,CCG005171.1,CCG016238.1,CCG009702.1,CCG015082.1,CCG021799.1,CCG009839.1,CCG006028.1,CCG024680.1,CCG018570.1,CCG026753.1,CCG017266.1,CCG028198.1,CCG016689.2,CCG025208.1,CCG021479.1,CCG023381.1,CCG019735.1,CCG016370.1,CCG014955.1,CCG008381.1,CCG021616.1,CCG027734.1,CCG002047.2,CCG024710.1,CCG021911.1,CCG018879.1,CCG004050.1,CCG008301.1,CCG020471.1,CCG021110.1,CCG022988.1,CCG003415.1,CCG017984.1,CCG019521.1,CCG018110.1,CCG027636.1,CCG004569.1,CCG020537.1,CCG024139.1,CCG024326.1,CCG008040.1,CCG003639.1,CCG020286.1,CCG013109.1,CCG027133.1,CCG010786.1,CCG011949.1,CCG006465.1,CCG003248.1,CCG023999.1,CCG025396.1,CCG018494.1,CCG020100.1,CCG002982.1,CCG016933.1,CCG026953.1,CCG001311.1,CCG010622.1,CCG003004.1,CCG019678.1,CCG017591.1,CCG024025.1,CCG007457.1,CCG013641.1,CCG016924.1,CCG012332.1,CCG009543.1,CCG003495.1,CCG002957.1,CCG003049.1,CCG020651.1,CCG012840.1,CCG024347.1,CCG011097.1,CCG025131.2,CCG005284.1,CCG002923.2,CCG005089.1,CCG002852.1,CCG019545.1,CCG010398.1,CCG001876.1,CCG015186.1,CCG016327.2,CCG026809.1,CCG007712.1,CCG018349.1,CCG001636.1,CCG028396.1,CCG023458.1,CCG027943.1,CCG003520.1,CCG006273.1,CCG001285.1,CCG006928.1,CCG010133.1,CCG016738.2,CCG022346.1,CCG003554.1,CCG015367.1,CCG000353.1,CCG011491.1,CCG008404.1,CCG018201.1,CCG008287.1,CCG021179.1,CCG001108.1,CCG001928.1,CCG010428.1,CCG004459.2,CCG016347.1,CCG004055.1,CCG009038.1,CCG025707.1,CCG028092.1,CCG018650.1,CCG021811.1,CCG024232.1, |
|------------|--------------------|-------------------------|-----------------------------|----------|--------------------------------------------------------------------------------------------------------------------------------------------------------------------------------------------------------------------------------------------------------------------------------------------------------------------------------------------------------------------------------------------------------------------------------------------------------------------------------------------------------------------------------------------------------------------------------------------------------------------------------------------------------------------------------------------------------------------------------------------------------------------------------------------------------------------------------------------------------------------------------------------------------------------------------------------------------------------------------------------------------------------------------------------------------------------------------------------------------------------------------------------------------------------------------------------------------------------------------------------------------------------------------------------------------------------------------------------------------------------------------------------------------------------------------------------------------------------------------------------------------------------------------------------------------------------------------------------------------------------------------------------------------------------------------------------------------------------------|

|            |                        |                         |                             |          |                                                                                                                                                                                                                                                                                                                                                                                                                                                                                                                                                                                                                                                                                                                                                                                                                                                                                                                                                                                                                                                                                                                                                                                                                                                                                                                                                                                                                                                                                                                                                                                                                                                                                                                          |
|------------|------------------------|-------------------------|-----------------------------|----------|--------------------------------------------------------------------------------------------------------------------------------------------------------------------------------------------------------------------------------------------------------------------------------------------------------------------------------------------------------------------------------------------------------------------------------------------------------------------------------------------------------------------------------------------------------------------------------------------------------------------------------------------------------------------------------------------------------------------------------------------------------------------------------------------------------------------------------------------------------------------------------------------------------------------------------------------------------------------------------------------------------------------------------------------------------------------------------------------------------------------------------------------------------------------------------------------------------------------------------------------------------------------------------------------------------------------------------------------------------------------------------------------------------------------------------------------------------------------------------------------------------------------------------------------------------------------------------------------------------------------------------------------------------------------------------------------------------------------------|
| GO:0032549 | ribonucleoside binding | 830 of 6765 in the list | 1336 of 12752 in the genome | 7.57E-10 | CCG017420.1,CCG024345.1,CCG014396.1,CCG004973.1,CCG006549.1,CCG004887.1,CCG007349.1,CCG003545.1,CCG010695.1,CCG009878.1,CCG005370.1,CCG007489.1,CCG016952.1,CCG016913.1,CCG014419.1,CCG027802.1,CCG026174.1,CCG007978.1,CCG019768.1,CCG013625.1,CCG005171.1,CCG016238.1,CCG009702.1,CCG015082.1,CCG021799.1,CCG009839.1,CCG006028.1,CCG024680.1,CCG018570.1,CCG026753.1,CCG017266.1,CCG028198.1,CCG016689.2,CCG025208.1,CCG021479.1,CCG023381.1,CCG019735.1,CCG016370.1,CCG014955.1,CCG008381.1,CCG021616.1,CCG027734.1,CCG002047.2,CCG024710.1,CCG021911.1,CCG018879.1,CCG004050.1,CCG008301.1,CCG020471.1,CCG021110.1,CCG022988.1,CCG003415.1,CCG017984.1,CCG019521.1,CCG018110.1,CCG027636.1,CCG004569.1,CCG020537.1,CCG024139.1,CCG024326.1,CCG008040.1,CCG003639.1,CCG020286.1,CCG013109.1,CCG027133.1,CCG010786.1,CCG011949.1,CCG006465.1,CCG003248.1,CCG023999.1,CCG025396.1,CCG018494.1,CCG020100.1,CCG002982.1,CCG016933.1,CCG026953.1,CCG001311.1,CCG010622.1,CCG003004.1,CCG019678.1,CCG017591.1,CCG024025.1,CCG007457.1,CCG013641.1,CCG016924.1,CCG012332.1,CCG009543.1,CCG003495.1,CCG002957.1,CCG003049.1,CCG020651.1,CCG012840.1,CCG024347.1,CCG011097.1,CCG025131.2,CCG005284.1,CCG002923.2,CCG005089.1,CCG002852.1,CCG019545.1,CCG010398.1,CCG001876.1,CCG015186.1,CCG016327.2,CCG026809.1,CCG007712.1,CCG018349.1,CCG001636.1,CCG028396.1,CCG023458.1,CCG027943.1,CCG003520.1,CCG006273.1,CCG001285.1,CCG006928.1,CCG010133.1,CCG016738.2,CCG022346.1,CCG003554.1,CCG015367.1,CCG000353.1,CCG011491.1,CCG008404.1,CCG018201.1,CCG008287.1,CCG021179.1,CCG001108.1,CCG001928.1,CCG010428.1,CCG004459.2,CCG016347.1,CCG004055.1,CCG009038.1,CCG025707.1,CCG028092.1,CCG018650.1,CCG021811.1,CCG024232.1, |
|------------|------------------------|-------------------------|-----------------------------|----------|--------------------------------------------------------------------------------------------------------------------------------------------------------------------------------------------------------------------------------------------------------------------------------------------------------------------------------------------------------------------------------------------------------------------------------------------------------------------------------------------------------------------------------------------------------------------------------------------------------------------------------------------------------------------------------------------------------------------------------------------------------------------------------------------------------------------------------------------------------------------------------------------------------------------------------------------------------------------------------------------------------------------------------------------------------------------------------------------------------------------------------------------------------------------------------------------------------------------------------------------------------------------------------------------------------------------------------------------------------------------------------------------------------------------------------------------------------------------------------------------------------------------------------------------------------------------------------------------------------------------------------------------------------------------------------------------------------------------------|

|            |                                                     |                         |                             |          |                                                                                                                                                                                                                                                                                                                                                                                                                                                                                                                                                                                                                                                                                                                                                                                                                                                                                                                                                                                                                                                                                                                                                                                                                                                                                                                                                                                                                                                                                                                                                                                                                                                                                                                          |
|------------|-----------------------------------------------------|-------------------------|-----------------------------|----------|--------------------------------------------------------------------------------------------------------------------------------------------------------------------------------------------------------------------------------------------------------------------------------------------------------------------------------------------------------------------------------------------------------------------------------------------------------------------------------------------------------------------------------------------------------------------------------------------------------------------------------------------------------------------------------------------------------------------------------------------------------------------------------------------------------------------------------------------------------------------------------------------------------------------------------------------------------------------------------------------------------------------------------------------------------------------------------------------------------------------------------------------------------------------------------------------------------------------------------------------------------------------------------------------------------------------------------------------------------------------------------------------------------------------------------------------------------------------------------------------------------------------------------------------------------------------------------------------------------------------------------------------------------------------------------------------------------------------------|
| GO:0035639 | purine<br>ribonucleoside<br>triphosphate<br>binding | 823 of 6765 in the list | 1325 of 12752 in the genome | 1.02E-09 | CCG017420.1,CCG024345.1,CCG014396.1,CCG004973.1,CCG006549.1,CCG004887.1,CCG007349.1,CCG003545.1,CCG010695.1,CCG009878.1,CCG005370.1,CCG007489.1,CCG016952.1,CCG016913.1,CCG014419.1,CCG027802.1,CCG026174.1,CCG007978.1,CCG019768.1,CCG013625.1,CCG005171.1,CCG016238.1,CCG009702.1,CCG015082.1,CCG021799.1,CCG009839.1,CCG006028.1,CCG024680.1,CCG018570.1,CCG026753.1,CCG017266.1,CCG028198.1,CCG016689.2,CCG025208.1,CCG021479.1,CCG023381.1,CCG019735.1,CCG016370.1,CCG014955.1,CCG008381.1,CCG021616.1,CCG027734.1,CCG002047.2,CCG024710.1,CCG021911.1,CCG018879.1,CCG004050.1,CCG008301.1,CCG020471.1,CCG021110.1,CCG022988.1,CCG003415.1,CCG017984.1,CCG019521.1,CCG018110.1,CCG027636.1,CCG004569.1,CCG020537.1,CCG024139.1,CCG024326.1,CCG008040.1,CCG003639.1,CCG020286.1,CCG013109.1,CCG027133.1,CCG010786.1,CCG011949.1,CCG006465.1,CCG003248.1,CCG023999.1,CCG025396.1,CCG018494.1,CCG020100.1,CCG002982.1,CCG016933.1,CCG026953.1,CCG001311.1,CCG010622.1,CCG003004.1,CCG019678.1,CCG017591.1,CCG024025.1,CCG007457.1,CCG013641.1,CCG016924.1,CCG012332.1,CCG009543.1,CCG003495.1,CCG002957.1,CCG003049.1,CCG020651.1,CCG012840.1,CCG024347.1,CCG011097.1,CCG025131.2,CCG005284.1,CCG002923.2,CCG005089.1,CCG002852.1,CCG019545.1,CCG010398.1,CCG001876.1,CCG015186.1,CCG016327.2,CCG026809.1,CCG007712.1,CCG018349.1,CCG001636.1,CCG028396.1,CCG023458.1,CCG027943.1,CCG003520.1,CCG006273.1,CCG001285.1,CCG006928.1,CCG010133.1,CCG016738.2,CCG022346.1,CCG003554.1,CCG015367.1,CCG000353.1,CCG011491.1,CCG008404.1,CCG018201.1,CCG008287.1,CCG021179.1,CCG001108.1,CCG001928.1,CCG010428.1,CCG004459.2,CCG016347.1,CCG004055.1,CCG009038.1,CCG025707.1,CCG028092.1,CCG018650.1,CCG021811.1,CCG024232.1, |
|------------|-----------------------------------------------------|-------------------------|-----------------------------|----------|--------------------------------------------------------------------------------------------------------------------------------------------------------------------------------------------------------------------------------------------------------------------------------------------------------------------------------------------------------------------------------------------------------------------------------------------------------------------------------------------------------------------------------------------------------------------------------------------------------------------------------------------------------------------------------------------------------------------------------------------------------------------------------------------------------------------------------------------------------------------------------------------------------------------------------------------------------------------------------------------------------------------------------------------------------------------------------------------------------------------------------------------------------------------------------------------------------------------------------------------------------------------------------------------------------------------------------------------------------------------------------------------------------------------------------------------------------------------------------------------------------------------------------------------------------------------------------------------------------------------------------------------------------------------------------------------------------------------------|

|            |                           |                         |                             |          |                                                                                                                                                                                                                                                                                                                                                                                                                                                                                                                                                                                                                                                                                                                                                                                                                                                                                                                                                                                                                                                                                                                                                                                                                                                                                                                                                                                                                                                                                                                                                                                                                                                                                                                          |
|------------|---------------------------|-------------------------|-----------------------------|----------|--------------------------------------------------------------------------------------------------------------------------------------------------------------------------------------------------------------------------------------------------------------------------------------------------------------------------------------------------------------------------------------------------------------------------------------------------------------------------------------------------------------------------------------------------------------------------------------------------------------------------------------------------------------------------------------------------------------------------------------------------------------------------------------------------------------------------------------------------------------------------------------------------------------------------------------------------------------------------------------------------------------------------------------------------------------------------------------------------------------------------------------------------------------------------------------------------------------------------------------------------------------------------------------------------------------------------------------------------------------------------------------------------------------------------------------------------------------------------------------------------------------------------------------------------------------------------------------------------------------------------------------------------------------------------------------------------------------------------|
| GO:0017076 | purine nucleotide binding | 827 of 6765 in the list | 1333 of 12752 in the genome | 1.30E-09 | CCG017420.1,CCG024345.1,CCG014396.1,CCG004973.1,CCG006549.1,CCG004887.1,CCG007349.1,CCG003545.1,CCG010695.1,CCG009878.1,CCG005370.1,CCG007489.1,CCG016952.1,CCG016913.1,CCG014419.1,CCG027802.1,CCG026174.1,CCG007978.1,CCG019768.1,CCG013625.1,CCG005171.1,CCG016238.1,CCG009702.1,CCG015082.1,CCG021799.1,CCG009839.1,CCG006028.1,CCG024680.1,CCG018570.1,CCG026753.1,CCG017266.1,CCG028198.1,CCG016689.2,CCG025208.1,CCG021479.1,CCG023381.1,CCG019735.1,CCG016370.1,CCG014955.1,CCG008381.1,CCG021616.1,CCG027734.1,CCG002047.2,CCG024710.1,CCG021911.1,CCG018879.1,CCG004050.1,CCG008301.1,CCG020471.1,CCG021110.1,CCG022988.1,CCG003415.1,CCG017984.1,CCG019521.1,CCG018110.1,CCG027636.1,CCG004569.1,CCG020537.1,CCG024139.1,CCG024326.1,CCG008040.1,CCG003639.1,CCG020286.1,CCG013109.1,CCG027133.1,CCG010786.1,CCG011949.1,CCG006465.1,CCG003248.1,CCG023999.1,CCG025396.1,CCG018494.1,CCG020100.1,CCG002982.1,CCG016933.1,CCG026953.1,CCG001311.1,CCG010622.1,CCG003004.1,CCG019678.1,CCG017591.1,CCG024025.1,CCG007457.1,CCG013641.1,CCG016924.1,CCG000732.1,CCG012332.1,CCG009543.1,CCG003495.1,CCG002957.1,CCG003049.1,CCG020651.1,CCG012840.1,CCG024347.1,CCG011097.1,CCG025131.2,CCG005284.1,CCG002923.2,CCG005089.1,CCG002852.1,CCG019545.1,CCG010398.1,CCG001876.1,CCG015186.1,CCG016327.2,CCG026809.1,CCG007712.1,CCG018349.1,CCG001636.1,CCG028396.1,CCG023458.1,CCG027943.1,CCG003520.1,CCG006273.1,CCG001285.1,CCG006928.1,CCG010133.1,CCG016738.2,CCG022346.1,CCG003554.1,CCG015367.1,CCG000353.1,CCG011491.1,CCG008404.1,CCG018201.1,CCG008939.1,CCG008287.1,CCG021179.1,CCG001108.1,CCG001928.1,CCG010428.1,CCG004459.2,CCG016347.1,CCG004055.1,CCG009038.1,CCG025707.1,CCG028092.1,CCG018650.1, |
|------------|---------------------------|-------------------------|-----------------------------|----------|--------------------------------------------------------------------------------------------------------------------------------------------------------------------------------------------------------------------------------------------------------------------------------------------------------------------------------------------------------------------------------------------------------------------------------------------------------------------------------------------------------------------------------------------------------------------------------------------------------------------------------------------------------------------------------------------------------------------------------------------------------------------------------------------------------------------------------------------------------------------------------------------------------------------------------------------------------------------------------------------------------------------------------------------------------------------------------------------------------------------------------------------------------------------------------------------------------------------------------------------------------------------------------------------------------------------------------------------------------------------------------------------------------------------------------------------------------------------------------------------------------------------------------------------------------------------------------------------------------------------------------------------------------------------------------------------------------------------------|

|            |                           |                         |                             |          |                                                                                                                                                                                                                                                                                                                                                                                                                                                                                                                                                                                                                                                                                                                                                                                                                                                                                                                                                                                                                                                                                                                                                                                                                                                                                                                                                                                                                                                                                                                                                                                                                                                                                                                          |
|------------|---------------------------|-------------------------|-----------------------------|----------|--------------------------------------------------------------------------------------------------------------------------------------------------------------------------------------------------------------------------------------------------------------------------------------------------------------------------------------------------------------------------------------------------------------------------------------------------------------------------------------------------------------------------------------------------------------------------------------------------------------------------------------------------------------------------------------------------------------------------------------------------------------------------------------------------------------------------------------------------------------------------------------------------------------------------------------------------------------------------------------------------------------------------------------------------------------------------------------------------------------------------------------------------------------------------------------------------------------------------------------------------------------------------------------------------------------------------------------------------------------------------------------------------------------------------------------------------------------------------------------------------------------------------------------------------------------------------------------------------------------------------------------------------------------------------------------------------------------------------|
| GO:0001883 | purine nucleoside binding | 824 of 6765 in the list | 1329 of 12752 in the genome | 1.75E-09 | CCG017420.1,CCG024345.1,CCG014396.1,CCG004973.1,CCG006549.1,CCG004887.1,CCG007349.1,CCG003545.1,CCG010695.1,CCG009878.1,CCG005370.1,CCG007489.1,CCG016952.1,CCG016913.1,CCG014419.1,CCG027802.1,CCG026174.1,CCG007978.1,CCG019768.1,CCG013625.1,CCG005171.1,CCG016238.1,CCG009702.1,CCG015082.1,CCG021799.1,CCG009839.1,CCG006028.1,CCG024680.1,CCG018570.1,CCG026753.1,CCG017266.1,CCG028198.1,CCG016689.2,CCG025208.1,CCG021479.1,CCG023381.1,CCG019735.1,CCG016370.1,CCG014955.1,CCG008381.1,CCG021616.1,CCG027734.1,CCG002047.2,CCG024710.1,CCG021911.1,CCG018879.1,CCG004050.1,CCG008301.1,CCG020471.1,CCG021110.1,CCG022988.1,CCG003415.1,CCG017984.1,CCG019521.1,CCG018110.1,CCG027636.1,CCG004569.1,CCG020537.1,CCG024139.1,CCG024326.1,CCG008040.1,CCG003639.1,CCG020286.1,CCG013109.1,CCG027133.1,CCG010786.1,CCG011949.1,CCG006465.1,CCG003248.1,CCG023999.1,CCG025396.1,CCG018494.1,CCG020100.1,CCG002982.1,CCG016933.1,CCG026953.1,CCG001311.1,CCG010622.1,CCG003004.1,CCG019678.1,CCG017591.1,CCG024025.1,CCG007457.1,CCG013641.1,CCG016924.1,CCG012332.1,CCG009543.1,CCG003495.1,CCG002957.1,CCG003049.1,CCG020651.1,CCG012840.1,CCG024347.1,CCG011097.1,CCG025131.2,CCG005284.1,CCG002923.2,CCG005089.1,CCG002852.1,CCG019545.1,CCG010398.1,CCG001876.1,CCG015186.1,CCG016327.2,CCG026809.1,CCG007712.1,CCG018349.1,CCG001636.1,CCG028396.1,CCG023458.1,CCG027943.1,CCG003520.1,CCG006273.1,CCG001285.1,CCG006928.1,CCG010133.1,CCG016738.2,CCG022346.1,CCG003554.1,CCG015367.1,CCG000353.1,CCG011491.1,CCG008404.1,CCG018201.1,CCG008287.1,CCG021179.1,CCG001108.1,CCG001928.1,CCG010428.1,CCG004459.2,CCG016347.1,CCG004055.1,CCG009038.1,CCG025707.1,CCG028092.1,CCG018650.1,CCG021811.1,CCG024232.1, |
|------------|---------------------------|-------------------------|-----------------------------|----------|--------------------------------------------------------------------------------------------------------------------------------------------------------------------------------------------------------------------------------------------------------------------------------------------------------------------------------------------------------------------------------------------------------------------------------------------------------------------------------------------------------------------------------------------------------------------------------------------------------------------------------------------------------------------------------------------------------------------------------------------------------------------------------------------------------------------------------------------------------------------------------------------------------------------------------------------------------------------------------------------------------------------------------------------------------------------------------------------------------------------------------------------------------------------------------------------------------------------------------------------------------------------------------------------------------------------------------------------------------------------------------------------------------------------------------------------------------------------------------------------------------------------------------------------------------------------------------------------------------------------------------------------------------------------------------------------------------------------------|

|            |                                     |                         |                             |          |                                                                                                                                                                                                                                                                                                                                                                                                                                                                                                                                                                                                                                                                                                                                                                                                                                                                                                                                                                                                                                                                                                                                                                                                                                                                                                                                                                                                                                                                                                                                                                                                                                                                                                                          |
|------------|-------------------------------------|-------------------------|-----------------------------|----------|--------------------------------------------------------------------------------------------------------------------------------------------------------------------------------------------------------------------------------------------------------------------------------------------------------------------------------------------------------------------------------------------------------------------------------------------------------------------------------------------------------------------------------------------------------------------------------------------------------------------------------------------------------------------------------------------------------------------------------------------------------------------------------------------------------------------------------------------------------------------------------------------------------------------------------------------------------------------------------------------------------------------------------------------------------------------------------------------------------------------------------------------------------------------------------------------------------------------------------------------------------------------------------------------------------------------------------------------------------------------------------------------------------------------------------------------------------------------------------------------------------------------------------------------------------------------------------------------------------------------------------------------------------------------------------------------------------------------------|
| GO:0032550 | purine<br>ribonucleoside<br>binding | 824 of 6765 in the list | 1329 of 12752 in the genome | 1.75E-09 | CCG017420.1,CCG024345.1,CCG014396.1,CCG004973.1,CCG006549.1,CCG004887.1,CCG007349.1,CCG003545.1,CCG010695.1,CCG009878.1,CCG005370.1,CCG007489.1,CCG016952.1,CCG016913.1,CCG014419.1,CCG027802.1,CCG026174.1,CCG007978.1,CCG019768.1,CCG013625.1,CCG005171.1,CCG016238.1,CCG009702.1,CCG015082.1,CCG021799.1,CCG009839.1,CCG006028.1,CCG024680.1,CCG018570.1,CCG026753.1,CCG017266.1,CCG028198.1,CCG016689.2,CCG025208.1,CCG021479.1,CCG023381.1,CCG019735.1,CCG016370.1,CCG014955.1,CCG008381.1,CCG021616.1,CCG027734.1,CCG002047.2,CCG024710.1,CCG021911.1,CCG018879.1,CCG004050.1,CCG008301.1,CCG020471.1,CCG021110.1,CCG022988.1,CCG003415.1,CCG017984.1,CCG019521.1,CCG018110.1,CCG027636.1,CCG004569.1,CCG020537.1,CCG024139.1,CCG024326.1,CCG008040.1,CCG003639.1,CCG020286.1,CCG013109.1,CCG027133.1,CCG010786.1,CCG011949.1,CCG006465.1,CCG003248.1,CCG023999.1,CCG025396.1,CCG018494.1,CCG020100.1,CCG002982.1,CCG016933.1,CCG026953.1,CCG001311.1,CCG010622.1,CCG003004.1,CCG019678.1,CCG017591.1,CCG024025.1,CCG007457.1,CCG013641.1,CCG016924.1,CCG012332.1,CCG009543.1,CCG003495.1,CCG002957.1,CCG003049.1,CCG020651.1,CCG012840.1,CCG024347.1,CCG011097.1,CCG025131.2,CCG005284.1,CCG002923.2,CCG005089.1,CCG002852.1,CCG019545.1,CCG010398.1,CCG001876.1,CCG015186.1,CCG016327.2,CCG026809.1,CCG007712.1,CCG018349.1,CCG001636.1,CCG028396.1,CCG023458.1,CCG027943.1,CCG003520.1,CCG006273.1,CCG001285.1,CCG006928.1,CCG010133.1,CCG016738.2,CCG022346.1,CCG003554.1,CCG015367.1,CCG000353.1,CCG011491.1,CCG008404.1,CCG018201.1,CCG008287.1,CCG021179.1,CCG001108.1,CCG001928.1,CCG010428.1,CCG004459.2,CCG016347.1,CCG004055.1,CCG009038.1,CCG025707.1,CCG028092.1,CCG018650.1,CCG021811.1,CCG024232.1, |
|------------|-------------------------------------|-------------------------|-----------------------------|----------|--------------------------------------------------------------------------------------------------------------------------------------------------------------------------------------------------------------------------------------------------------------------------------------------------------------------------------------------------------------------------------------------------------------------------------------------------------------------------------------------------------------------------------------------------------------------------------------------------------------------------------------------------------------------------------------------------------------------------------------------------------------------------------------------------------------------------------------------------------------------------------------------------------------------------------------------------------------------------------------------------------------------------------------------------------------------------------------------------------------------------------------------------------------------------------------------------------------------------------------------------------------------------------------------------------------------------------------------------------------------------------------------------------------------------------------------------------------------------------------------------------------------------------------------------------------------------------------------------------------------------------------------------------------------------------------------------------------------------|

|            |                                     |                         |                             |          |                                                                                                                                                                                                                                                                                                                                                                                                                                                                                                                                                                                                                                                                                                                                                                                                                                                                                                                                                                                                                                                                                                                                                                                                                                                                                                                                                                                                                                                                                                                                                                                                                                                                                                                          |
|------------|-------------------------------------|-------------------------|-----------------------------|----------|--------------------------------------------------------------------------------------------------------------------------------------------------------------------------------------------------------------------------------------------------------------------------------------------------------------------------------------------------------------------------------------------------------------------------------------------------------------------------------------------------------------------------------------------------------------------------------------------------------------------------------------------------------------------------------------------------------------------------------------------------------------------------------------------------------------------------------------------------------------------------------------------------------------------------------------------------------------------------------------------------------------------------------------------------------------------------------------------------------------------------------------------------------------------------------------------------------------------------------------------------------------------------------------------------------------------------------------------------------------------------------------------------------------------------------------------------------------------------------------------------------------------------------------------------------------------------------------------------------------------------------------------------------------------------------------------------------------------------|
| GO:0032555 | purine<br>ribonucleotide<br>binding | 824 of 6765 in the list | 1329 of 12752 in the genome | 1.75E-09 | CCG017420.1,CCG024345.1,CCG014396.1,CCG004973.1,CCG006549.1,CCG004887.1,CCG007349.1,CCG003545.1,CCG010695.1,CCG009878.1,CCG005370.1,CCG007489.1,CCG016952.1,CCG016913.1,CCG014419.1,CCG027802.1,CCG026174.1,CCG007978.1,CCG019768.1,CCG013625.1,CCG005171.1,CCG016238.1,CCG009702.1,CCG015082.1,CCG021799.1,CCG009839.1,CCG006028.1,CCG024680.1,CCG018570.1,CCG026753.1,CCG017266.1,CCG028198.1,CCG016689.2,CCG025208.1,CCG021479.1,CCG023381.1,CCG019735.1,CCG016370.1,CCG014955.1,CCG008381.1,CCG021616.1,CCG027734.1,CCG002047.2,CCG024710.1,CCG021911.1,CCG018879.1,CCG004050.1,CCG008301.1,CCG020471.1,CCG021110.1,CCG022988.1,CCG003415.1,CCG017984.1,CCG019521.1,CCG018110.1,CCG027636.1,CCG004569.1,CCG020537.1,CCG024139.1,CCG024326.1,CCG008040.1,CCG003639.1,CCG020286.1,CCG013109.1,CCG027133.1,CCG010786.1,CCG011949.1,CCG006465.1,CCG003248.1,CCG023999.1,CCG025396.1,CCG018494.1,CCG020100.1,CCG002982.1,CCG016933.1,CCG026953.1,CCG001311.1,CCG010622.1,CCG003004.1,CCG019678.1,CCG017591.1,CCG024025.1,CCG007457.1,CCG013641.1,CCG016924.1,CCG012332.1,CCG009543.1,CCG003495.1,CCG002957.1,CCG003049.1,CCG020651.1,CCG012840.1,CCG024347.1,CCG011097.1,CCG025131.2,CCG005284.1,CCG002923.2,CCG005089.1,CCG002852.1,CCG019545.1,CCG010398.1,CCG001876.1,CCG015186.1,CCG016327.2,CCG026809.1,CCG007712.1,CCG018349.1,CCG001636.1,CCG028396.1,CCG023458.1,CCG027943.1,CCG003520.1,CCG006273.1,CCG001285.1,CCG006928.1,CCG010133.1,CCG016738.2,CCG022346.1,CCG003554.1,CCG015367.1,CCG000353.1,CCG011491.1,CCG008404.1,CCG018201.1,CCG008287.1,CCG021179.1,CCG001108.1,CCG001928.1,CCG010428.1,CCG004459.2,CCG016347.1,CCG004055.1,CCG009038.1,CCG025707.1,CCG028092.1,CCG018650.1,CCG021811.1,CCG024232.1, |
|------------|-------------------------------------|-------------------------|-----------------------------|----------|--------------------------------------------------------------------------------------------------------------------------------------------------------------------------------------------------------------------------------------------------------------------------------------------------------------------------------------------------------------------------------------------------------------------------------------------------------------------------------------------------------------------------------------------------------------------------------------------------------------------------------------------------------------------------------------------------------------------------------------------------------------------------------------------------------------------------------------------------------------------------------------------------------------------------------------------------------------------------------------------------------------------------------------------------------------------------------------------------------------------------------------------------------------------------------------------------------------------------------------------------------------------------------------------------------------------------------------------------------------------------------------------------------------------------------------------------------------------------------------------------------------------------------------------------------------------------------------------------------------------------------------------------------------------------------------------------------------------------|

|            |                    |                         |                             |          |                                                                                                                                                                                                                                                                                                                                                                                                                                                                                                                                                                                                                                                                                                                                                                                                                                                                                                                                                                                                                                                                                                                                                                                                                                                                                                                                                                                                                                                                                                                                                                                                                                                                                                                          |
|------------|--------------------|-------------------------|-----------------------------|----------|--------------------------------------------------------------------------------------------------------------------------------------------------------------------------------------------------------------------------------------------------------------------------------------------------------------------------------------------------------------------------------------------------------------------------------------------------------------------------------------------------------------------------------------------------------------------------------------------------------------------------------------------------------------------------------------------------------------------------------------------------------------------------------------------------------------------------------------------------------------------------------------------------------------------------------------------------------------------------------------------------------------------------------------------------------------------------------------------------------------------------------------------------------------------------------------------------------------------------------------------------------------------------------------------------------------------------------------------------------------------------------------------------------------------------------------------------------------------------------------------------------------------------------------------------------------------------------------------------------------------------------------------------------------------------------------------------------------------------|
| GO:0000166 | nucleotide binding | 925 of 6765 in the list | 1511 of 12752 in the genome | 4.58E-09 | CCG017420.1,CCG024345.1,CCG014396.1,CCG004973.1,CCG006549.1,CCG004887.1,CCG007349.1,CCG003545.1,CCG010695.1,CCG009878.1,CCG005370.1,CCG020913.1,CCG007489.1,CCG016952.1,CCG004595.1,CCG016913.1,CCG014419.1,CCG027802.1,CCG026174.1,CCG007978.1,CCG019768.1,CCG013625.1,CCG005171.1,CCG016238.1,CCG009702.1,CCG015082.1,CCG021799.1,CCG010284.1,CCG009839.1,CCG006028.1,CCG024680.1,CCG018570.1,CCG026753.1,CCG017266.1,CCG028198.1,CCG016689.2,CCG025208.1,CCG021479.1,CCG023381.1,CCG019735.1,CCG016370.1,CCG014955.1,CCG022025.2,CCG008381.1,CCG021616.1,CCG027734.1,CCG002047.2,CCG024710.1,CCG021911.1,CCG018879.1,CCG004050.1,CCG008301.1,CCG020471.1,CCG021110.1,CCG022988.1,CCG003415.1,CCG017984.1,CCG019521.1,CCG018110.1,CCG027636.1,CCG004569.1,CCG020537.1,CCG024139.1,CCG024326.1,CCG008040.1,CCG003639.1,CCG020286.1,CCG018253.1,CCG013109.1,CCG027133.1,CCG010786.1,CCG011949.1,CCG006465.1,CCG003248.1,CCG023999.1,CCG025396.1,CCG018494.1,CCG020100.1,CCG002982.1,CCG016933.1,CCG026953.1,CCG001311.1,CCG016480.1,CCG010622.1,CCG003004.1,CCG018290.1,CCG019678.1,CCG017591.1,CCG018257.1,CCG024025.1,CCG007457.1,CCG023468.1,CCG013641.1,CCG016924.1,CCG000732.1,CCG012332.1,CCG002113.1,CCG009543.1,CCG003495.1,CCG002957.1,CCG003049.1,CCG020651.1,CCG012840.1,CCG024347.1,CCG011097.1,CCG025131.2,CCG005284.1,CCG002923.2,CCG005089.1,CCG002852.1,CCG019545.1,CCG022056.1,CCG010398.1,CCG001876.1,CCG015186.1,CCG016327.2,CCG026809.1,CCG007712.1,CCG018349.1,CCG008902.1,CCG001636.1,CCG028396.1,CCG023458.1,CCG025096.1,CCG027943.1,CCG003520.1,CCG006273.1,CCG001285.1,CCG006928.1,CCG010133.1,CCG016738.2,CCG022346.1,CCG003554.1,CCG015367.1,CCG000353.1,CCG011491.1,CCG008404.1,CCG018201.1, |
|------------|--------------------|-------------------------|-----------------------------|----------|--------------------------------------------------------------------------------------------------------------------------------------------------------------------------------------------------------------------------------------------------------------------------------------------------------------------------------------------------------------------------------------------------------------------------------------------------------------------------------------------------------------------------------------------------------------------------------------------------------------------------------------------------------------------------------------------------------------------------------------------------------------------------------------------------------------------------------------------------------------------------------------------------------------------------------------------------------------------------------------------------------------------------------------------------------------------------------------------------------------------------------------------------------------------------------------------------------------------------------------------------------------------------------------------------------------------------------------------------------------------------------------------------------------------------------------------------------------------------------------------------------------------------------------------------------------------------------------------------------------------------------------------------------------------------------------------------------------------------|

|            |                                 |                         |                             |          |                                                                                                                                                                                                                                                                                                                                                                                                                                                                                                                                                                                                                                                                                                                                                                                                                                                                                                                                                                                                                                                                                                                                                                                                                                                                                                                                                                                                                                                                                                                                                                                                                                                                                                                          |
|------------|---------------------------------|-------------------------|-----------------------------|----------|--------------------------------------------------------------------------------------------------------------------------------------------------------------------------------------------------------------------------------------------------------------------------------------------------------------------------------------------------------------------------------------------------------------------------------------------------------------------------------------------------------------------------------------------------------------------------------------------------------------------------------------------------------------------------------------------------------------------------------------------------------------------------------------------------------------------------------------------------------------------------------------------------------------------------------------------------------------------------------------------------------------------------------------------------------------------------------------------------------------------------------------------------------------------------------------------------------------------------------------------------------------------------------------------------------------------------------------------------------------------------------------------------------------------------------------------------------------------------------------------------------------------------------------------------------------------------------------------------------------------------------------------------------------------------------------------------------------------------|
| GO:1901265 | nucleoside<br>phosphate binding | 925 of 6765 in the list | 1511 of 12752 in the genome | 4.58E-09 | CCG017420.1,CCG024345.1,CCG014396.1,CCG004973.1,CCG006549.1,CCG004887.1,CCG007349.1,CCG003545.1,CCG010695.1,CCG009878.1,CCG005370.1,CCG020913.1,CCG007489.1,CCG016952.1,CCG004595.1,CCG016913.1,CCG014419.1,CCG027802.1,CCG026174.1,CCG007978.1,CCG019768.1,CCG013625.1,CCG005171.1,CCG016238.1,CCG009702.1,CCG015082.1,CCG021799.1,CCG010284.1,CCG009839.1,CCG006028.1,CCG024680.1,CCG018570.1,CCG026753.1,CCG017266.1,CCG028198.1,CCG016689.2,CCG025208.1,CCG021479.1,CCG023381.1,CCG019735.1,CCG016370.1,CCG014955.1,CCG022025.2,CCG008381.1,CCG021616.1,CCG027734.1,CCG002047.2,CCG024710.1,CCG021911.1,CCG018879.1,CCG004050.1,CCG008301.1,CCG020471.1,CCG021110.1,CCG022988.1,CCG003415.1,CCG017984.1,CCG019521.1,CCG018110.1,CCG027636.1,CCG004569.1,CCG020537.1,CCG024139.1,CCG024326.1,CCG008040.1,CCG003639.1,CCG020286.1,CCG018253.1,CCG013109.1,CCG027133.1,CCG010786.1,CCG011949.1,CCG006465.1,CCG003248.1,CCG023999.1,CCG025396.1,CCG018494.1,CCG020100.1,CCG002982.1,CCG016933.1,CCG026953.1,CCG001311.1,CCG016480.1,CCG010622.1,CCG003004.1,CCG018290.1,CCG019678.1,CCG017591.1,CCG018257.1,CCG024025.1,CCG007457.1,CCG023468.1,CCG013641.1,CCG016924.1,CCG000732.1,CCG012332.1,CCG002113.1,CCG009543.1,CCG003495.1,CCG002957.1,CCG003049.1,CCG020651.1,CCG012840.1,CCG024347.1,CCG011097.1,CCG025131.2,CCG005284.1,CCG002923.2,CCG005089.1,CCG002852.1,CCG019545.1,CCG022056.1,CCG010398.1,CCG001876.1,CCG015186.1,CCG016327.2,CCG026809.1,CCG007712.1,CCG018349.1,CCG008902.1,CCG001636.1,CCG028396.1,CCG023458.1,CCG025096.1,CCG027943.1,CCG003520.1,CCG006273.1,CCG001285.1,CCG006928.1,CCG010133.1,CCG016738.2,CCG022346.1,CCG003554.1,CCG015367.1,CCG000353.1,CCG011491.1,CCG008404.1,CCG018201.1, |
|------------|---------------------------------|-------------------------|-----------------------------|----------|--------------------------------------------------------------------------------------------------------------------------------------------------------------------------------------------------------------------------------------------------------------------------------------------------------------------------------------------------------------------------------------------------------------------------------------------------------------------------------------------------------------------------------------------------------------------------------------------------------------------------------------------------------------------------------------------------------------------------------------------------------------------------------------------------------------------------------------------------------------------------------------------------------------------------------------------------------------------------------------------------------------------------------------------------------------------------------------------------------------------------------------------------------------------------------------------------------------------------------------------------------------------------------------------------------------------------------------------------------------------------------------------------------------------------------------------------------------------------------------------------------------------------------------------------------------------------------------------------------------------------------------------------------------------------------------------------------------------------|

|            |                        |                         |                             |          |                                                                                                                                                                                                                                                                                                                                                                                                                                                                                                                                                                                                                                                                                                                                                                                                                                                                                                                                                                                                                                                                                                                                                                                                                                                                                                                                                                                                                                                                                                                                                                                                                                                                                                                          |
|------------|------------------------|-------------------------|-----------------------------|----------|--------------------------------------------------------------------------------------------------------------------------------------------------------------------------------------------------------------------------------------------------------------------------------------------------------------------------------------------------------------------------------------------------------------------------------------------------------------------------------------------------------------------------------------------------------------------------------------------------------------------------------------------------------------------------------------------------------------------------------------------------------------------------------------------------------------------------------------------------------------------------------------------------------------------------------------------------------------------------------------------------------------------------------------------------------------------------------------------------------------------------------------------------------------------------------------------------------------------------------------------------------------------------------------------------------------------------------------------------------------------------------------------------------------------------------------------------------------------------------------------------------------------------------------------------------------------------------------------------------------------------------------------------------------------------------------------------------------------------|
| GO:0032553 | ribonucleotide binding | 828 of 6765 in the list | 1342 of 12752 in the genome | 7.05E-09 | CCG017420.1,CCG024345.1,CCG014396.1,CCG004973.1,CCG006549.1,CCG004887.1,CCG007349.1,CCG003545.1,CCG010695.1,CCG009878.1,CCG005370.1,CCG007489.1,CCG016952.1,CCG016913.1,CCG014419.1,CCG027802.1,CCG026174.1,CCG007978.1,CCG019768.1,CCG013625.1,CCG005171.1,CCG016238.1,CCG009702.1,CCG015082.1,CCG021799.1,CCG009839.1,CCG006028.1,CCG024680.1,CCG018570.1,CCG026753.1,CCG017266.1,CCG028198.1,CCG016689.2,CCG025208.1,CCG021479.1,CCG023381.1,CCG019735.1,CCG016370.1,CCG014955.1,CCG008381.1,CCG021616.1,CCG027734.1,CCG002047.2,CCG024710.1,CCG021911.1,CCG018879.1,CCG004050.1,CCG008301.1,CCG020471.1,CCG021110.1,CCG022988.1,CCG003415.1,CCG017984.1,CCG019521.1,CCG018110.1,CCG027636.1,CCG004569.1,CCG020537.1,CCG024139.1,CCG024326.1,CCG008040.1,CCG003639.1,CCG020286.1,CCG013109.1,CCG027133.1,CCG010786.1,CCG011949.1,CCG006465.1,CCG003248.1,CCG023999.1,CCG025396.1,CCG018494.1,CCG020100.1,CCG002982.1,CCG016933.1,CCG026953.1,CCG001311.1,CCG010622.1,CCG003004.1,CCG019678.1,CCG017591.1,CCG024025.1,CCG007457.1,CCG013641.1,CCG016924.1,CCG012332.1,CCG009543.1,CCG003495.1,CCG002957.1,CCG003049.1,CCG020651.1,CCG012840.1,CCG024347.1,CCG011097.1,CCG025131.2,CCG005284.1,CCG002923.2,CCG005089.1,CCG002852.1,CCG019545.1,CCG010398.1,CCG001876.1,CCG015186.1,CCG016327.2,CCG026809.1,CCG007712.1,CCG018349.1,CCG001636.1,CCG028396.1,CCG023458.1,CCG027943.1,CCG003520.1,CCG006273.1,CCG001285.1,CCG006928.1,CCG010133.1,CCG016738.2,CCG022346.1,CCG003554.1,CCG015367.1,CCG000353.1,CCG011491.1,CCG008404.1,CCG018201.1,CCG008287.1,CCG021179.1,CCG001108.1,CCG001928.1,CCG010428.1,CCG004459.2,CCG016347.1,CCG004055.1,CCG009038.1,CCG025707.1,CCG028092.1,CCG018650.1,CCG021811.1,CCG024232.1, |
|------------|------------------------|-------------------------|-----------------------------|----------|--------------------------------------------------------------------------------------------------------------------------------------------------------------------------------------------------------------------------------------------------------------------------------------------------------------------------------------------------------------------------------------------------------------------------------------------------------------------------------------------------------------------------------------------------------------------------------------------------------------------------------------------------------------------------------------------------------------------------------------------------------------------------------------------------------------------------------------------------------------------------------------------------------------------------------------------------------------------------------------------------------------------------------------------------------------------------------------------------------------------------------------------------------------------------------------------------------------------------------------------------------------------------------------------------------------------------------------------------------------------------------------------------------------------------------------------------------------------------------------------------------------------------------------------------------------------------------------------------------------------------------------------------------------------------------------------------------------------------|

|            |                   |                         |                            |          |                                                                                                                                                                                                                                                                                                                                                                                                                                                                                                                                                                                                                                                                                                                                                                                                                                                                                                                                                                                                                                                                                                                                                                                                                                                                                                                                                                                                                                                                                                                                                    |
|------------|-------------------|-------------------------|----------------------------|----------|----------------------------------------------------------------------------------------------------------------------------------------------------------------------------------------------------------------------------------------------------------------------------------------------------------------------------------------------------------------------------------------------------------------------------------------------------------------------------------------------------------------------------------------------------------------------------------------------------------------------------------------------------------------------------------------------------------------------------------------------------------------------------------------------------------------------------------------------------------------------------------------------------------------------------------------------------------------------------------------------------------------------------------------------------------------------------------------------------------------------------------------------------------------------------------------------------------------------------------------------------------------------------------------------------------------------------------------------------------------------------------------------------------------------------------------------------------------------------------------------------------------------------------------------------|
| GO:0004386 | helicase activity | 126 of 6765 in the list | 161 of 12752 in the genome | 1.72E-08 | CCG006899.1,CCG012073.1,CCG013963.1,CCG017680.1,CCG007349.1,CCG008622.1,CCG010555.2,CCG014495.1,CCG005892.1,CCG013205.1,CCG001928.1,CCG012302.1,CCG010428.1,CCG007489.1,CCG016913.1,CCG015165.1,CCG007978.1,CCG005171.1,CCG003459.1,CCG018650.1,CCG021811.1,CCG006284.1,CCG009702.1,CCG015082.1,CCG028267.1,CCG021799.1,CCG020871.1,CCG009839.1,CCG017637.1,CCG002766.1,CCG016160.1,CCG018570.1,CCG026753.1,CCG014912.1,CCG018478.1,CCG019648.1,CCG022070.1,CCG027261.1,CCG010291.1,CCG017503.1,CCG008488.1,CCG026693.1,CCG007043.1,CCG016979.2,CCG021436.1,CCG013292.1,CCG000575.1,CCG025419.1,CCG008698.1,CCG016482.1,CCG024804.1,CCG006267.1,CCG016409.1,CCG024514.1,CCG016034.1,CCG000777.1,CCG022447.1,CCG001940.1,CCG003402.1,CCG008498.1,CCG003149.1,CCG020471.1,CCG024143.1,CCG000776.1,CCG018799.1,CCG019521.1,CCG018472.1,CCG010208.1,CCG024170.1,CCG024460.2,CCG024270.1,CCG026678.1,CCG001360.1,CCG020286.1,CCG003731.1,CCG020620.1,CCG011662.1,CCG027348.1,CCG010786.1,CCG027133.1,CCG008489.1,CCG002661.1,CCG017214.1,CCG022444.1,CCG024065.1,CCG008320.1,CCG010116.1,CCG008843.1,CCG008612.2,CCG006572.1,CCG015704.1,CCG026666.1,CCG004576.1,CCG014496.1,CCG026345.1,CCG011369.1,CCG016855.3,CCG024097.1,CCG002085.1,CCG024025.1,CCG017985.2,CCG006846.1,CCG021334.1,CCG004862.2,CCG008031.1,CCG020869.1,CCG028422.2,CCG008188.1,CCG000490.1,CCG016191.1,CCG024172.1,CCG001125.1,CCG007418.1,CCG006233.1,CCG002923.2,CCG010398.1,CCG025358.4,CCG007783.1,CCG003796.1,CCG026662.1,CCG007160.1,CCG001636.1,CCG026193.1,CCG007782.1,CC |
|------------|-------------------|-------------------------|----------------------------|----------|----------------------------------------------------------------------------------------------------------------------------------------------------------------------------------------------------------------------------------------------------------------------------------------------------------------------------------------------------------------------------------------------------------------------------------------------------------------------------------------------------------------------------------------------------------------------------------------------------------------------------------------------------------------------------------------------------------------------------------------------------------------------------------------------------------------------------------------------------------------------------------------------------------------------------------------------------------------------------------------------------------------------------------------------------------------------------------------------------------------------------------------------------------------------------------------------------------------------------------------------------------------------------------------------------------------------------------------------------------------------------------------------------------------------------------------------------------------------------------------------------------------------------------------------------|

|            |                        |                         |                             |          |                                                                                                                                                                                                                                                                                                                                                                                                                                                                                                                                                                                                                                                                                                                                                                                                                                                                                                                                                                                                                                                                                                                                                                                                                                                                                                                                                                                                                                                                                                                                                                                                                                                                                                                          |
|------------|------------------------|-------------------------|-----------------------------|----------|--------------------------------------------------------------------------------------------------------------------------------------------------------------------------------------------------------------------------------------------------------------------------------------------------------------------------------------------------------------------------------------------------------------------------------------------------------------------------------------------------------------------------------------------------------------------------------------------------------------------------------------------------------------------------------------------------------------------------------------------------------------------------------------------------------------------------------------------------------------------------------------------------------------------------------------------------------------------------------------------------------------------------------------------------------------------------------------------------------------------------------------------------------------------------------------------------------------------------------------------------------------------------------------------------------------------------------------------------------------------------------------------------------------------------------------------------------------------------------------------------------------------------------------------------------------------------------------------------------------------------------------------------------------------------------------------------------------------------|
| GO:0036094 | small molecule binding | 957 of 6765 in the list | 1574 of 12752 in the genome | 1.77E-08 | CCG017420.1,CCG024345.1,CCG014396.1,CCG004973.1,CCG006549.1,CCG004887.1,CCG007349.1,CCG003545.1,CCG010695.1,CCG009878.1,CCG005370.1,CCG020913.1,CCG007489.1,CCG016952.1,CCG004595.1,CCG016913.1,CCG014419.1,CCG027802.1,CCG026174.1,CCG007978.1,CCG019768.1,CCG013625.1,CCG005171.1,CCG016238.1,CCG009702.1,CCG015082.1,CCG021799.1,CCG010284.1,CCG009839.1,CCG006028.1,CCG024680.1,CCG018570.1,CCG026753.1,CCG017266.1,CCG009496.1,CCG028198.1,CCG016689.2,CCG025208.1,CCG021479.1,CCG023381.1,CCG019735.1,CCG016370.1,CCG014955.1,CCG022025.2,CCG008381.1,CCG021616.1,CCG027734.1,CCG002047.2,CCG024710.1,CCG021911.1,CCG018879.1,CCG004050.1,CCG008301.1,CCG020471.1,CCG021110.1,CCG022988.1,CCG003415.1,CCG017984.1,CCG019521.1,CCG018110.1,CCG027636.1,CCG004569.1,CCG020537.1,CCG024139.1,CCG024326.1,CCG008040.1,CCG003639.1,CCG020286.1,CCG018253.1,CCG013109.1,CCG027133.1,CCG010786.1,CCG011949.1,CCG006465.1,CCG003248.1,CCG023999.1,CCG025396.1,CCG018494.1,CCG020100.1,CCG002982.1,CCG016933.1,CCG026953.1,CCG001311.1,CCG016480.1,CCG010622.1,CCG003004.1,CCG018290.1,CCG019678.1,CCG017591.1,CCG018257.1,CCG024025.1,CCG007457.1,CCG023468.1,CCG013641.1,CCG016924.1,CCG000732.1,CCG012332.1,CCG002113.1,CCG009543.1,CCG003495.1,CCG002957.1,CCG003049.1,CCG020651.1,CCG012840.1,CCG024347.1,CCG011097.1,CCG025131.2,CCG005284.1,CCG002923.2,CCG005089.1,CCG002852.1,CCG019545.1,CCG022056.1,CCG010398.1,CCG001876.1,CCG015186.1,CCG016327.2,CCG026809.1,CCG007712.1,CCG018349.1,CCG008902.1,CCG001636.1,CCG028396.1,CCG023458.1,CCG025096.1,CCG027943.1,CCG003520.1,CCG006273.1,CCG001285.1,CCG006928.1,CCG010133.1,CCG016738.2,CCG022346.1,CCG003554.1,CCG015367.1,CCG000353.1,CCG011491.1,CCG008404.1, |
|------------|------------------------|-------------------------|-----------------------------|----------|--------------------------------------------------------------------------------------------------------------------------------------------------------------------------------------------------------------------------------------------------------------------------------------------------------------------------------------------------------------------------------------------------------------------------------------------------------------------------------------------------------------------------------------------------------------------------------------------------------------------------------------------------------------------------------------------------------------------------------------------------------------------------------------------------------------------------------------------------------------------------------------------------------------------------------------------------------------------------------------------------------------------------------------------------------------------------------------------------------------------------------------------------------------------------------------------------------------------------------------------------------------------------------------------------------------------------------------------------------------------------------------------------------------------------------------------------------------------------------------------------------------------------------------------------------------------------------------------------------------------------------------------------------------------------------------------------------------------------|

|            |               |                          |                             |          |                                                                                                                                                                                                                                                                                                                                                                                                                                                                                                                                                                                                                                                                                                                                                                                                                                                                                                                                                                                                                                                                                                                                                                                                                                                                                                                                                                                                                                                                                                                                                                                                                                                                                                                          |
|------------|---------------|--------------------------|-----------------------------|----------|--------------------------------------------------------------------------------------------------------------------------------------------------------------------------------------------------------------------------------------------------------------------------------------------------------------------------------------------------------------------------------------------------------------------------------------------------------------------------------------------------------------------------------------------------------------------------------------------------------------------------------------------------------------------------------------------------------------------------------------------------------------------------------------------------------------------------------------------------------------------------------------------------------------------------------------------------------------------------------------------------------------------------------------------------------------------------------------------------------------------------------------------------------------------------------------------------------------------------------------------------------------------------------------------------------------------------------------------------------------------------------------------------------------------------------------------------------------------------------------------------------------------------------------------------------------------------------------------------------------------------------------------------------------------------------------------------------------------------|
| GO:0043168 | anion binding | 1003 of 6765 in the list | 1656 of 12752 in the genome | 1.89E-08 | CCG009860.1,CCG017420.1,CCG024345.1,CCG014396.1,CCG004973.1,CCG006549.1,CCG004887.1,CCG007349.1,CCG003545.1,CCG010695.1,CCG028623.1,CCG009878.1,CCG005370.1,CCG020913.1,CCG007489.1,CCG016952.1,CCG004595.1,CCG016913.1,CCG014419.1,CCG013009.1,CCG027802.1,CCG026174.1,CCG007978.1,CCG019768.1,CCG010849.1,CCG013625.1,CCG005171.1,CCG016238.1,CCG009702.1,CCG015082.1,CCG021799.1,CCG010284.1,CCG009839.1,CCG006028.1,CCG024680.1,CCG018570.1,CCG026753.1,CCG017266.1,CCG009496.1,CCG028198.1,CCG016689.2,CCG025208.1,CCG021479.1,CCG023381.1,CCG019735.1,CCG016370.1,CCG014955.1,CCG008381.1,CCG021616.1,CCG027734.1,CCG002047.2,CCG024710.1,CCG021911.1,CCG018879.1,CCG004050.1,CCG022420.1,CCG008301.1,CCG020471.1,CCG021110.1,CCG022988.1,CCG003415.1,CCG017984.1,CCG019521.1,CCG018110.1,CCG027636.1,CCG004569.1,CCG020537.1,CCG024139.1,CCG024326.1,CCG008040.1,CCG003639.1,CCG020286.1,CCG018253.1,CCG004132.1,CCG013109.1,CCG027133.1,CCG010786.1,CCG011949.1,CCG006465.1,CCG003248.1,CCG023999.1,CCG025396.1,CCG018494.1,CCG020100.1,CCG002982.1,CCG016933.1,CCG026953.1,CCG001311.1,CCG016480.1,CCG010622.1,CCG003004.1,CCG017498.1,CCG019678.1,CCG017591.1,CCG018257.1,CCG023464.1,CCG024025.1,CCG001579.1,CCG007457.1,CCG011437.1,CCG013641.1,CCG016924.1,CCG012332.1,CCG002113.1,CCG009543.1,CCG003495.1,CCG009662.1,CCG002957.1,CCG003049.1,CCG020651.1,CCG012840.1,CCG024347.1,CCG011097.1,CCG025131.2,CCG005284.1,CCG002923.2,CCG027765.1,CCG005089.1,CCG002852.1,CCG018888.1,CCG019545.1,CCG022056.1,CCG010398.1,CCG001876.1,CCG015186.1,CCG016327.2,CCG026809.1,CCG007712.1,CCG018349.1,CCG008902.1,CCG001636.1,CCG028396.1,CCG023458.1,CCG025096.1,CCG027943.1,CCG003520.1,CCG006273.1,CCG001285.1, |
|------------|---------------|--------------------------|-----------------------------|----------|--------------------------------------------------------------------------------------------------------------------------------------------------------------------------------------------------------------------------------------------------------------------------------------------------------------------------------------------------------------------------------------------------------------------------------------------------------------------------------------------------------------------------------------------------------------------------------------------------------------------------------------------------------------------------------------------------------------------------------------------------------------------------------------------------------------------------------------------------------------------------------------------------------------------------------------------------------------------------------------------------------------------------------------------------------------------------------------------------------------------------------------------------------------------------------------------------------------------------------------------------------------------------------------------------------------------------------------------------------------------------------------------------------------------------------------------------------------------------------------------------------------------------------------------------------------------------------------------------------------------------------------------------------------------------------------------------------------------------|

|            |                                    |                         |                             |          |                                                                                                                                                                                                                                                                                                                                                                                                                                                                                                                                                                                                                                                                                                                                                                                                                                                                                                                                                                                                                                                                                                                                                                                                                                                                                                                                                                                                                                                                                                                                                                                                                                                                                                                          |
|------------|------------------------------------|-------------------------|-----------------------------|----------|--------------------------------------------------------------------------------------------------------------------------------------------------------------------------------------------------------------------------------------------------------------------------------------------------------------------------------------------------------------------------------------------------------------------------------------------------------------------------------------------------------------------------------------------------------------------------------------------------------------------------------------------------------------------------------------------------------------------------------------------------------------------------------------------------------------------------------------------------------------------------------------------------------------------------------------------------------------------------------------------------------------------------------------------------------------------------------------------------------------------------------------------------------------------------------------------------------------------------------------------------------------------------------------------------------------------------------------------------------------------------------------------------------------------------------------------------------------------------------------------------------------------------------------------------------------------------------------------------------------------------------------------------------------------------------------------------------------------------|
| GO:0097367 | carbohydrate<br>derivative binding | 901 of 6765 in the list | 1491 of 12752 in the genome | 4.81E-07 | CCG017420.1,CCG024345.1,CCG014396.1,CCG004973.1,CCG006549.1,CCG004887.1,CCG007349.1,CCG006912.1,CCG003545.1,CCG010695.1,CCG009878.1,CCG005370.1,CCG007489.1,CCG016952.1,CCG016913.1,CCG014419.1,CCG027802.1,CCG026174.1,CCG007978.1,CCG019768.1,CCG013625.1,CCG005171.1,CCG016238.1,CCG009702.1,CCG015082.1,CCG021799.1,CCG009839.1,CCG006028.1,CCG024680.1,CCG018570.1,CCG026753.1,CCG017266.1,CCG028198.1,CCG016689.2,CCG025208.1,CCG021479.1,CCG023381.1,CCG019735.1,CCG016370.1,CCG014955.1,CCG008381.1,CCG021616.1,CCG027734.1,CCG002047.2,CCG024710.1,CCG019371.1,CCG021911.1,CCG018879.1,CCG004050.1,CCG008301.1,CCG020471.1,CCG021110.1,CCG022988.1,CCG003415.1,CCG017984.1,CCG019521.1,CCG018110.1,CCG027636.1,CCG004569.1,CCG020537.1,CCG024139.1,CCG016153.1,CCG024326.1,CCG008040.1,CCG003639.1,CCG020286.1,CCG013109.1,CCG027133.1,CCG010786.1,CCG011949.1,CCG006465.1,CCG003248.1,CCG023999.1,CCG025396.1,CCG018494.1,CCG020100.1,CCG002982.1,CCG016933.1,CCG026953.1,CCG001311.1,CCG010622.1,CCG003004.1,CCG019678.1,CCG017591.1,CCG024025.1,CCG007457.1,CCG013641.1,CCG016924.1,CCG012332.1,CCG009543.1,CCG003495.1,CCG002957.1,CCG003049.1,CCG020651.1,CCG012840.1,CCG024347.1,CCG011097.1,CCG025131.2,CCG005284.1,CCG002923.2,CCG005089.1,CCG002852.1,CCG019545.1,CCG010398.1,CCG001876.1,CCG015186.1,CCG016327.2,CCG026809.1,CCG007712.1,CCG018349.1,CCG001636.1,CCG028396.1,CCG028454.1,CCG020663.1,CCG023458.1,CCG027943.1,CCG003520.1,CCG006273.1,CCG001285.1,CCG006928.1,CCG010133.1,CCG016738.2,CCG022346.1,CCG003554.1,CCG015367.1,CCG000353.1,CCG011491.1,CCG008404.1,CCG018201.1,CCG008287.1,CCG021179.1,CCG001108.1,CCG001928.1,CCG010428.1,CCG004459.2,CCG016347.1,CCG004055.1,CCG009038.1, |
|------------|------------------------------------|-------------------------|-----------------------------|----------|--------------------------------------------------------------------------------------------------------------------------------------------------------------------------------------------------------------------------------------------------------------------------------------------------------------------------------------------------------------------------------------------------------------------------------------------------------------------------------------------------------------------------------------------------------------------------------------------------------------------------------------------------------------------------------------------------------------------------------------------------------------------------------------------------------------------------------------------------------------------------------------------------------------------------------------------------------------------------------------------------------------------------------------------------------------------------------------------------------------------------------------------------------------------------------------------------------------------------------------------------------------------------------------------------------------------------------------------------------------------------------------------------------------------------------------------------------------------------------------------------------------------------------------------------------------------------------------------------------------------------------------------------------------------------------------------------------------------------|

|            |                            |                        |                            |          |                                                                                                                                                                                                                                                                                                                                                                                                                                                                                                                                                                                                                                                                                                                                                                                                                                                                                                                                                                                                                                                                                          |
|------------|----------------------------|------------------------|----------------------------|----------|------------------------------------------------------------------------------------------------------------------------------------------------------------------------------------------------------------------------------------------------------------------------------------------------------------------------------------------------------------------------------------------------------------------------------------------------------------------------------------------------------------------------------------------------------------------------------------------------------------------------------------------------------------------------------------------------------------------------------------------------------------------------------------------------------------------------------------------------------------------------------------------------------------------------------------------------------------------------------------------------------------------------------------------------------------------------------------------|
| GO:0008168 | methyltransferase activity | 89 of 6765 in the list | 115 of 12752 in the genome | 3.97E-05 | CCG014335.1,CCG022589.1,CCG021695.1,CCG005079.1,CCG021449.1,CCG010111.1,CCG023408.1,CCG002236.1,CCG004234.1,CCG001108.1,CCG011492.1,CCG025108.1,CCG016274.1,CCG018190.1,CCG023156.1,CCG024298.1,CCG019834.1,CCG014986.1,CCG001171.1,CCG021056.1,CCG013859.1,CCG010681.1,CCG012836.1,CCG007968.1,CCG028554.1,CCG014519.1,CCG026248.1,CCG022183.1,CCG006585.1,CCG015546.1,CCG023905.2,CCG025940.1,CCG013914.1,CCG014824.1,CCG011597.1,CCG001082.1,CCG010791.1,CCG016016.1,CCG002221.1,CCG005355.1,CCG009882.1,CCG003063.1,CCG006009.1,CCG007777.1,CCG012278.1,CCG025942.1,CCG009235.1,CCG016251.1,CCG007913.2,CCG000417.1,CCG013856.1,CCG004180.1,CCG020154.1,CCG002674.1,CCG002711.1,CCG000448.1,CCG019953.1,CCG012083.1,CCG026602.1,CCG024611.1,CCG002462.1,CCG001369.2,CCG024098.1,CCG020675.1,CCG008897.1,CCG020342.1,CCG008510.1,CCG005153.1,CCG025991.2,CCG006187.1,CCG005144.1,CCG011888.1,CCG008401.1,CCG009425.1,CCG018902.1,CCG004612.1,CCG003755.1,CCG021244.2,CCG025816.1,CCG025634.1,CCG013889.1,CCG017176.1,CCG015398.1,CCG005097.1,CCG005108.1,CCG017377.1,CCG002140.1,CCG0 |
|------------|----------------------------|------------------------|----------------------------|----------|------------------------------------------------------------------------------------------------------------------------------------------------------------------------------------------------------------------------------------------------------------------------------------------------------------------------------------------------------------------------------------------------------------------------------------------------------------------------------------------------------------------------------------------------------------------------------------------------------------------------------------------------------------------------------------------------------------------------------------------------------------------------------------------------------------------------------------------------------------------------------------------------------------------------------------------------------------------------------------------------------------------------------------------------------------------------------------------|

|            |                                 |                        |                            |          |                                                                                                                                                                                                                                                                                                                                                                                                                                                                                                                                                                                                                                                                                                                                                                                                                                                                                                                                                                                                                                                                                     |
|------------|---------------------------------|------------------------|----------------------------|----------|-------------------------------------------------------------------------------------------------------------------------------------------------------------------------------------------------------------------------------------------------------------------------------------------------------------------------------------------------------------------------------------------------------------------------------------------------------------------------------------------------------------------------------------------------------------------------------------------------------------------------------------------------------------------------------------------------------------------------------------------------------------------------------------------------------------------------------------------------------------------------------------------------------------------------------------------------------------------------------------------------------------------------------------------------------------------------------------|
| GO:0008026 | ATP-dependent helicase activity | 87 of 6765 in the list | 112 of 12752 in the genome | 4.11E-05 | CCG012073.1,CCG017680.1,CCG007349.1,CCG008622.1,CCG010555.2,CCG013205.1,CCG001928.1,CCG012302.1,CCG007489.1,CCG016913.1,CCG015165.1,CCG007978.1,CCG005171.1,CCG018650.1,CCG021811.1,CCG006284.1,CCG009702.1,CCG028267.1,CCG021799.1,CCG020871.1,CCG017637.1,CCG016160.1,CCG018570.1,CCG026753.1,CCG018478.1,CCG019648.1,CCG022070.1,CCG027261.1,CCG010291.1,CCG017503.1,CCG026693.1,CCG016979.2,CCG013292.1,CCG025419.1,CCG008698.1,CCG016482.1,CCG024804.1,CCG024514.1,CCG016034.1,CCG001940.1,CCG008498.1,CCG020471.1,CCG003149.1,CCG018799.1,CCG019521.1,CCG018472.1,CCG010208.1,CCG024460.2,CCG024270.1,CCG020620.1,CCG011662.1,CCG010786.1,CCG027133.1,CCG008489.1,CCG002661.1,CCG024065.1,CCG008320.1,CCG010116.1,CCG006572.1,CCG008612.2,CCG015704.1,CCG026666.1,CCG004576.1,CCG026345.1,CCG011369.1,CCG024097.1,CCG016855.3,CCG017985.2,CCG021334.1,CCG006846.1,CCG020869.1,CCG008031.1,CCG000490.1,CCG008188.1,CCG016191.1,CCG024172.1,CCG001125.1,CCG007418.1,CCG002923.2,CCG006233.1,CCG010398.1,CCG007783.1,CCG003796.1,CCG001636.1,CCG026193.1,CCG007782.1,CCG013150.1 |
|------------|---------------------------------|------------------------|----------------------------|----------|-------------------------------------------------------------------------------------------------------------------------------------------------------------------------------------------------------------------------------------------------------------------------------------------------------------------------------------------------------------------------------------------------------------------------------------------------------------------------------------------------------------------------------------------------------------------------------------------------------------------------------------------------------------------------------------------------------------------------------------------------------------------------------------------------------------------------------------------------------------------------------------------------------------------------------------------------------------------------------------------------------------------------------------------------------------------------------------|

|            |                                        |                        |                            |          |                                                                                                                                                                                                                                                                                                                                                                                                                                                                                                                                                                                                                                                                                                                                                                                                                                                                                                                                                                                                                                                                                     |
|------------|----------------------------------------|------------------------|----------------------------|----------|-------------------------------------------------------------------------------------------------------------------------------------------------------------------------------------------------------------------------------------------------------------------------------------------------------------------------------------------------------------------------------------------------------------------------------------------------------------------------------------------------------------------------------------------------------------------------------------------------------------------------------------------------------------------------------------------------------------------------------------------------------------------------------------------------------------------------------------------------------------------------------------------------------------------------------------------------------------------------------------------------------------------------------------------------------------------------------------|
| GO:0070035 | purine NTP-dependent helicase activity | 87 of 6765 in the list | 112 of 12752 in the genome | 4.11E-05 | CCG012073.1,CCG017680.1,CCG007349.1,CCG008622.1,CCG010555.2,CCG013205.1,CCG001928.1,CCG012302.1,CCG007489.1,CCG016913.1,CCG015165.1,CCG007978.1,CCG005171.1,CCG018650.1,CCG021811.1,CCG006284.1,CCG009702.1,CCG028267.1,CCG021799.1,CCG020871.1,CCG017637.1,CCG016160.1,CCG018570.1,CCG026753.1,CCG018478.1,CCG019648.1,CCG022070.1,CCG027261.1,CCG010291.1,CCG017503.1,CCG026693.1,CCG016979.2,CCG013292.1,CCG025419.1,CCG008698.1,CCG016482.1,CCG024804.1,CCG024514.1,CCG016034.1,CCG001940.1,CCG008498.1,CCG020471.1,CCG003149.1,CCG018799.1,CCG019521.1,CCG018472.1,CCG010208.1,CCG024460.2,CCG024270.1,CCG020620.1,CCG011662.1,CCG010786.1,CCG027133.1,CCG008489.1,CCG002661.1,CCG024065.1,CCG008320.1,CCG010116.1,CCG006572.1,CCG008612.2,CCG015704.1,CCG026666.1,CCG004576.1,CCG026345.1,CCG011369.1,CCG024097.1,CCG016855.3,CCG017985.2,CCG021334.1,CCG006846.1,CCG020869.1,CCG008031.1,CCG000490.1,CCG008188.1,CCG016191.1,CCG024172.1,CCG001125.1,CCG007418.1,CCG002923.2,CCG006233.1,CCG010398.1,CCG007783.1,CCG003796.1,CCG001636.1,CCG026193.1,CCG007782.1,CCG013150.1 |
|------------|----------------------------------------|------------------------|----------------------------|----------|-------------------------------------------------------------------------------------------------------------------------------------------------------------------------------------------------------------------------------------------------------------------------------------------------------------------------------------------------------------------------------------------------------------------------------------------------------------------------------------------------------------------------------------------------------------------------------------------------------------------------------------------------------------------------------------------------------------------------------------------------------------------------------------------------------------------------------------------------------------------------------------------------------------------------------------------------------------------------------------------------------------------------------------------------------------------------------------|

|            |                                                             |                        |                            |         |                                                                                                                                                                                                                                                                                                                                                                                                                                                                                                                                                                                                                                                                                                                                                                                                                                                                                                                                                                                                                                                                                                                                                 |
|------------|-------------------------------------------------------------|------------------------|----------------------------|---------|-------------------------------------------------------------------------------------------------------------------------------------------------------------------------------------------------------------------------------------------------------------------------------------------------------------------------------------------------------------------------------------------------------------------------------------------------------------------------------------------------------------------------------------------------------------------------------------------------------------------------------------------------------------------------------------------------------------------------------------------------------------------------------------------------------------------------------------------------------------------------------------------------------------------------------------------------------------------------------------------------------------------------------------------------------------------------------------------------------------------------------------------------|
| GO:0016741 | transferase activity,<br>transferring one-<br>carbon groups | 92 of 6765 in the list | 124 of 12752 in the genome | 0.00074 | CCG014335.1,CCG022589.1,CCG021695.1,CCG005079.1,CCG021449.1,CCG010111.1,CCG023408.1,CCG002236.1,CCG004234.1,CCG001108.1,CCG011492.1,CCG025108.1,CCG016274.1,CCG018190.1,CCG023156.1,CCG024298.1,CCG019834.1,CCG014986.1,CCG001171.1,CCG021056.1,CCG013859.1,CCG010681.1,CCG012836.1,CCG007968.1,CCG028554.1,CCG014519.1,CCG026248.1,CCG022183.1,CCG006585.1,CCG015546.1,CCG023905.2,CCG025940.1,CCG013914.1,CCG014824.1,CCG011597.1,CCG018108.1,CCG001082.1,CCG010791.1,CCG016016.1,CCG002221.1,CCG005355.1,CCG009882.1,CCG003063.1,CCG006009.1,CCG007777.1,CCG012278.1,CCG025942.1,CCG009235.1,CCG016251.1,CCG007913.2,CCG000417.1,CCG013856.1,CCG004180.1,CCG020154.1,CCG002674.1,CCG005938.1,CCG002711.1,CCG000448.1,CCG019953.1,CCG012083.1,CCG026602.1,CCG024611.1,CCG002462.1,CCG001369.2,CCG024098.1,CCG020675.1,CCG008897.1,CCG020342.1,CCG008510.1,CCG005153.1,CCG025991.2,CCG006187.1,CCG005144.1,CCG011888.1,CCG008401.1,CCG009425.1,CCG018902.1,CCG004612.1,CCG003755.1,CCG021244.2,CCG025816.1,CCG025634.1,CCG013889.1,CCG017176.1,CCG015398.1,CCG005097.1,CCG005108.1,CCG017377.1,CCG002140.1,CCG028009.1,CCG022788.1,CCG008388.1 |
|------------|-------------------------------------------------------------|------------------------|----------------------------|---------|-------------------------------------------------------------------------------------------------------------------------------------------------------------------------------------------------------------------------------------------------------------------------------------------------------------------------------------------------------------------------------------------------------------------------------------------------------------------------------------------------------------------------------------------------------------------------------------------------------------------------------------------------------------------------------------------------------------------------------------------------------------------------------------------------------------------------------------------------------------------------------------------------------------------------------------------------------------------------------------------------------------------------------------------------------------------------------------------------------------------------------------------------|

|            |                                    |                         |                            |         |                                                                                                                                                                                                                                                                                                                                                                                                                                                                                                                                                                                                                                                                                                                                                                                                                                                                                                                                                                                                                                                                                                                                                                                                                                                                                                                                                                                                                                                                                                                                                                                                                                                                                                                          |
|------------|------------------------------------|-------------------------|----------------------------|---------|--------------------------------------------------------------------------------------------------------------------------------------------------------------------------------------------------------------------------------------------------------------------------------------------------------------------------------------------------------------------------------------------------------------------------------------------------------------------------------------------------------------------------------------------------------------------------------------------------------------------------------------------------------------------------------------------------------------------------------------------------------------------------------------------------------------------------------------------------------------------------------------------------------------------------------------------------------------------------------------------------------------------------------------------------------------------------------------------------------------------------------------------------------------------------------------------------------------------------------------------------------------------------------------------------------------------------------------------------------------------------------------------------------------------------------------------------------------------------------------------------------------------------------------------------------------------------------------------------------------------------------------------------------------------------------------------------------------------------|
| GO:0017111 | nucleoside-triphosphatase activity | 391 of 6765 in the list | 635 of 12752 in the genome | 0.00417 | CCG017420.1,CCG024345.1,CCG006549.1,CCG007349.1,CCG003545.1,CCG010695.1,CCG000585.1,CCG007667.1,CCG007489.1,CCG019020.1,CCG016913.1,CCG027802.1,CCG007978.1,CCG019768.1,CCG005171.1,CCG001167.1,CCG009702.1,CCG015082.1,CCG021799.1,CCG003274.1,CCG011006.1,CCG009839.1,CCG017637.1,CCG002766.1,CCG018570.1,CCG005696.1,CCG026753.1,CCG001379.1,CCG015599.1,CCG008801.1,CCG025208.1,CCG021436.1,CCG000575.1,CCG000825.1,CCG016370.1,CCG016967.1,CCG027183.2,CCG000166.1,CCG021530.1,CCG027734.1,CCG022447.1,CCG026987.1,CCG021911.1,CCG018879.1,CCG004078.1,CCG020471.1,CCG024143.1,CCG022988.1,CCG018799.1,CCG011764.1,CCG003415.1,CCG019521.1,CCG024170.1,CCG026678.1,CCG003639.1,CCG020286.1,CCG003731.1,CCG027133.1,CCG010786.1,CCG003438.1,CCG010116.1,CCG023999.1,CCG025396.1,CCG020100.1,CCG016254.1,CCG016933.1,CCG026666.1,CCG026953.1,CCG001770.1,CCG010622.1,CCG014496.1,CCG003004.1,CCG022996.1,CCG022837.1,CCG016855.3,CCG019678.1,CCG024025.1,CCG021555.1,CCG021334.1,CCG013641.1,CCG005888.1,CCG004862.2,CCG002364.1,CCG016903.1,CCG003495.1,CCG021228.1,CCG000715.1,CCG020651.1,CCG024347.1,CCG015143.1,CCG025131.2,CCG006233.1,CCG002923.2,CCG022994.1,CCG005089.1,CCG002852.1,CCG023127.1,CCG010398.1,CCG012664.1,CCG026809.1,CCG003796.1,CCG006251.1,CCG018349.1,CCG021895.1,CCG001636.1,CCG001285.1,CCG010133.1,CCG013963.1,CCG003707.1,CCG025933.1,CCG013205.1,CCG001928.1,CCG010428.1,CCG004459.2,CCG027365.1,CCG001397.1,CCG004055.1,CCG004084.1,CCG021811.1,CCG018650.1,CCG020318.1,CCG006421.1,CCG023963.3,CCG018478.1,CCG022070.1,CCG008488.1,CCG010663.1,CCG015426.1,CCG024300.1,CCG025419.1,CCG016482.1,CCG025510.1,CCG024804.1,CCG014205.1,CCG026979.1,CCG010363.1,CCG004226.1,CCG023435.1, |
|------------|------------------------------------|-------------------------|----------------------------|---------|--------------------------------------------------------------------------------------------------------------------------------------------------------------------------------------------------------------------------------------------------------------------------------------------------------------------------------------------------------------------------------------------------------------------------------------------------------------------------------------------------------------------------------------------------------------------------------------------------------------------------------------------------------------------------------------------------------------------------------------------------------------------------------------------------------------------------------------------------------------------------------------------------------------------------------------------------------------------------------------------------------------------------------------------------------------------------------------------------------------------------------------------------------------------------------------------------------------------------------------------------------------------------------------------------------------------------------------------------------------------------------------------------------------------------------------------------------------------------------------------------------------------------------------------------------------------------------------------------------------------------------------------------------------------------------------------------------------------------|

|            |                                                                                                    |                         |                            |         |                                                                                                                                                                                                                                                                                                                                                                                                                                                                                                                                                                                                                                                                                                                                                                                                                                                                                                                                                                                                                                                                                                                                                                                                                                                                                                                                                                                                                                                                                                                                                                                                                                                                                                                          |
|------------|----------------------------------------------------------------------------------------------------|-------------------------|----------------------------|---------|--------------------------------------------------------------------------------------------------------------------------------------------------------------------------------------------------------------------------------------------------------------------------------------------------------------------------------------------------------------------------------------------------------------------------------------------------------------------------------------------------------------------------------------------------------------------------------------------------------------------------------------------------------------------------------------------------------------------------------------------------------------------------------------------------------------------------------------------------------------------------------------------------------------------------------------------------------------------------------------------------------------------------------------------------------------------------------------------------------------------------------------------------------------------------------------------------------------------------------------------------------------------------------------------------------------------------------------------------------------------------------------------------------------------------------------------------------------------------------------------------------------------------------------------------------------------------------------------------------------------------------------------------------------------------------------------------------------------------|
| GO:0016818 | hydrolase activity,<br>acting on acid<br>anhydrides, in<br>phosphorus-<br>containing<br>anhydrides | 396 of 6765 in the list | 644 of 12752 in the genome | 0.00439 | CCG017420.1,CCG024345.1,CCG006549.1,CCG007349.1,CCG003545.1,CCG010695.1,CCG000585.1,CCG007667.1,CCG007489.1,CCG019020.1,CCG016913.1,CCG027802.1,CCG007978.1,CCG019768.1,CCG005171.1,CCG001167.1,CCG009702.1,CCG015082.1,CCG021799.1,CCG003274.1,CCG011006.1,CCG009839.1,CCG017637.1,CCG002766.1,CCG018570.1,CCG005696.1,CCG026753.1,CCG001379.1,CCG015599.1,CCG008801.1,CCG025208.1,CCG021436.1,CCG000575.1,CCG000825.1,CCG016370.1,CCG016967.1,CCG027183.2,CCG000166.1,CCG021530.1,CCG027734.1,CCG022447.1,CCG026987.1,CCG021911.1,CCG018879.1,CCG004078.1,CCG020471.1,CCG024143.1,CCG022988.1,CCG018799.1,CCG011764.1,CCG003415.1,CCG019521.1,CCG024170.1,CCG026678.1,CCG003639.1,CCG020286.1,CCG003731.1,CCG027133.1,CCG010786.1,CCG003438.1,CCG010116.1,CCG023999.1,CCG025396.1,CCG020100.1,CCG016254.1,CCG016933.1,CCG026666.1,CCG026953.1,CCG001770.1,CCG010622.1,CCG014496.1,CCG003004.1,CCG022996.1,CCG022837.1,CCG016855.3,CCG019678.1,CCG024025.1,CCG021555.1,CCG021334.1,CCG013641.1,CCG005888.1,CCG004862.2,CCG002364.1,CCG016903.1,CCG003495.1,CCG021228.1,CCG003260.1,CCG000715.1,CCG020651.1,CCG024347.1,CCG015143.1,CCG025131.2,CCG006233.1,CCG002923.2,CCG022994.1,CCG005089.1,CCG002852.1,CCG023127.1,CCG010398.1,CCG012664.1,CCG026809.1,CCG003796.1,CCG006251.1,CCG018349.1,CCG021895.1,CCG001636.1,CCG001285.1,CCG010133.1,CCG013963.1,CCG003707.1,CCG025933.1,CCG013205.1,CCG001928.1,CCG010428.1,CCG004459.2,CCG027365.1,CCG001397.1,CCG004055.1,CCG004084.1,CCG021811.1,CCG018650.1,CCG020318.1,CCG006421.1,CCG023963.3,CCG018478.1,CCG022070.1,CCG027252.1,CCG008488.1,CCG010663.1,CCG015426.1,CCG024300.1,CCG025419.1,CCG016482.1,CCG025510.1,CCG024804.1,CCG014205.1,CCG026979.1,CCG010363.1, |
|------------|----------------------------------------------------------------------------------------------------|-------------------------|----------------------------|---------|--------------------------------------------------------------------------------------------------------------------------------------------------------------------------------------------------------------------------------------------------------------------------------------------------------------------------------------------------------------------------------------------------------------------------------------------------------------------------------------------------------------------------------------------------------------------------------------------------------------------------------------------------------------------------------------------------------------------------------------------------------------------------------------------------------------------------------------------------------------------------------------------------------------------------------------------------------------------------------------------------------------------------------------------------------------------------------------------------------------------------------------------------------------------------------------------------------------------------------------------------------------------------------------------------------------------------------------------------------------------------------------------------------------------------------------------------------------------------------------------------------------------------------------------------------------------------------------------------------------------------------------------------------------------------------------------------------------------------|

|            |                                      |                        |                           |        |                                                                                                                                                                                                                                                                                                                                                                                                                                                                                      |
|------------|--------------------------------------|------------------------|---------------------------|--------|--------------------------------------------------------------------------------------------------------------------------------------------------------------------------------------------------------------------------------------------------------------------------------------------------------------------------------------------------------------------------------------------------------------------------------------------------------------------------------------|
| GO:0003899 | DNA-directed RNA polymerase activity | 39 of 6765 in the list | 46 of 12752 in the genome | 0.0045 | CCG018768.2,CCG021083.1,CCG010797.1,CCG007155.1,CCG001509.1,CCG006767.1,CCG019296.1,CCG005846.1,CCG014840.1,CCG011129.1,CCG015694.1,CCG006484.1,CCG018507.1,CCG015039.1,CCG004224.1,CCG015704.1,CCG023775.1,CCG000489.1,CCG017046.2,CCG000209.1,CCG019541.1,CCG002470.1,CCG006164.1,CCG018617.1,CCG008027.1,CCG024392.1,CCG011384.1,CCG025157.1,CCG007856.1,CCG003112.1,CCG027401.1,CCG018243.1,CCG024200.1,CCG023125.1,CCG016381.1,CCG016776.1,CCG000468.1,CCG000000.1,CCG0001000.1 |
|------------|--------------------------------------|------------------------|---------------------------|--------|--------------------------------------------------------------------------------------------------------------------------------------------------------------------------------------------------------------------------------------------------------------------------------------------------------------------------------------------------------------------------------------------------------------------------------------------------------------------------------------|

|            |                                                     |                         |                            |         |                                                                                                                                                                                                                                                                                                                                                                                                                                                                                                                                                                                                                                                                                                                                                                                                                                                                                                                                                                                                                                                                                                                                                                                                                                                                                                                                                                                                                                                                                                                                                                                                                                                                                                                          |
|------------|-----------------------------------------------------|-------------------------|----------------------------|---------|--------------------------------------------------------------------------------------------------------------------------------------------------------------------------------------------------------------------------------------------------------------------------------------------------------------------------------------------------------------------------------------------------------------------------------------------------------------------------------------------------------------------------------------------------------------------------------------------------------------------------------------------------------------------------------------------------------------------------------------------------------------------------------------------------------------------------------------------------------------------------------------------------------------------------------------------------------------------------------------------------------------------------------------------------------------------------------------------------------------------------------------------------------------------------------------------------------------------------------------------------------------------------------------------------------------------------------------------------------------------------------------------------------------------------------------------------------------------------------------------------------------------------------------------------------------------------------------------------------------------------------------------------------------------------------------------------------------------------|
| GO:0016817 | hydrolase activity,<br>acting on acid<br>anhydrides | 402 of 6765 in the list | 655 of 12752 in the genome | 0.00487 | CCG017420.1,CCG024345.1,CCG006549.1,CCG007349.1,CCG003545.1,CCG010695.1,CCG000585.1,CCG007667.1,CCG007489.1,CCG019020.1,CCG016913.1,CCG027802.1,CCG007978.1,CCG019768.1,CCG005171.1,CCG001167.1,CCG009702.1,CCG015082.1,CCG021799.1,CCG003274.1,CCG011006.1,CCG009839.1,CCG017637.1,CCG002766.1,CCG018570.1,CCG005696.1,CCG026753.1,CCG001379.1,CCG015599.1,CCG008801.1,CCG025208.1,CCG021436.1,CCG000575.1,CCG000825.1,CCG016370.1,CCG016967.1,CCG027183.2,CCG000166.1,CCG021530.1,CCG027734.1,CCG022447.1,CCG026987.1,CCG021911.1,CCG018879.1,CCG004078.1,CCG020471.1,CCG024143.1,CCG022988.1,CCG018799.1,CCG011764.1,CCG003415.1,CCG019521.1,CCG020537.1,CCG024170.1,CCG026678.1,CCG003639.1,CCG020286.1,CCG003731.1,CCG027133.1,CCG010786.1,CCG012534.1,CCG003438.1,CCG010116.1,CCG023999.1,CCG025396.1,CCG020100.1,CCG016254.1,CCG016933.1,CCG026666.1,CCG026953.1,CCG001770.1,CCG010622.1,CCG014496.1,CCG003004.1,CCG022996.1,CCG022837.1,CCG016855.3,CCG019678.1,CCG024025.1,CCG021555.1,CCG021334.1,CCG013641.1,CCG005888.1,CCG004862.2,CCG002364.1,CCG016903.1,CCG003495.1,CCG021228.1,CCG003260.1,CCG000715.1,CCG020651.1,CCG024347.1,CCG015143.1,CCG025131.2,CCG006233.1,CCG002923.2,CCG022994.1,CCG005089.1,CCG002852.1,CCG023127.1,CCG010398.1,CCG012664.1,CCG026809.1,CCG003796.1,CCG006251.1,CCG018349.1,CCG021895.1,CCG001636.1,CCG001285.1,CCG010133.1,CCG013963.1,CCG003707.1,CCG025933.1,CCG013205.1,CCG001928.1,CCG010428.1,CCG004459.2,CCG027365.1,CCG001397.1,CCG004055.1,CCG014759.1,CCG004084.1,CCG021811.1,CCG018650.1,CCG020318.1,CCG006421.1,CCG023963.3,CCG018478.1,CCG022070.1,CCG027252.1,CCG008488.1,CCG010663.1,CCG015426.1,CCG024300.1,CCG025419.1,CCG016482.1,CCG025510.1,CCG024804.1, |
|------------|-----------------------------------------------------|-------------------------|----------------------------|---------|--------------------------------------------------------------------------------------------------------------------------------------------------------------------------------------------------------------------------------------------------------------------------------------------------------------------------------------------------------------------------------------------------------------------------------------------------------------------------------------------------------------------------------------------------------------------------------------------------------------------------------------------------------------------------------------------------------------------------------------------------------------------------------------------------------------------------------------------------------------------------------------------------------------------------------------------------------------------------------------------------------------------------------------------------------------------------------------------------------------------------------------------------------------------------------------------------------------------------------------------------------------------------------------------------------------------------------------------------------------------------------------------------------------------------------------------------------------------------------------------------------------------------------------------------------------------------------------------------------------------------------------------------------------------------------------------------------------------------|

|            |                                      |                         |                            |        |                                                                                                                                                                                                                                                                                                                                                                                                                                                                                                                                                                                                                                                                                                                                                                                                                                                                                                                                                                                                                                                                                                                                                                                                                                                                                                                                                                                                                                                                                                                                                                                                                                                                                                                          |
|------------|--------------------------------------|-------------------------|----------------------------|--------|--------------------------------------------------------------------------------------------------------------------------------------------------------------------------------------------------------------------------------------------------------------------------------------------------------------------------------------------------------------------------------------------------------------------------------------------------------------------------------------------------------------------------------------------------------------------------------------------------------------------------------------------------------------------------------------------------------------------------------------------------------------------------------------------------------------------------------------------------------------------------------------------------------------------------------------------------------------------------------------------------------------------------------------------------------------------------------------------------------------------------------------------------------------------------------------------------------------------------------------------------------------------------------------------------------------------------------------------------------------------------------------------------------------------------------------------------------------------------------------------------------------------------------------------------------------------------------------------------------------------------------------------------------------------------------------------------------------------------|
| GO:0016462 | pyrophosphatase activity             | 394 of 6765 in the list | 641 of 12752 in the genome | 0.0049 | CCG017420.1,CCG024345.1,CCG006549.1,CCG007349.1,CCG003545.1,CCG010695.1,CCG000585.1,CCG007667.1,CCG007489.1,CCG019020.1,CCG016913.1,CCG027802.1,CCG007978.1,CCG019768.1,CCG005171.1,CCG001167.1,CCG009702.1,CCG015082.1,CCG021799.1,CCG003274.1,CCG011006.1,CCG009839.1,CCG017637.1,CCG002766.1,CCG018570.1,CCG005696.1,CCG026753.1,CCG001379.1,CCG015599.1,CCG008801.1,CCG025208.1,CCG021436.1,CCG000575.1,CCG000825.1,CCG016370.1,CCG016967.1,CCG027183.2,CCG000166.1,CCG021530.1,CCG027734.1,CCG022447.1,CCG026987.1,CCG021911.1,CCG018879.1,CCG004078.1,CCG020471.1,CCG024143.1,CCG022988.1,CCG018799.1,CCG011764.1,CCG003415.1,CCG019521.1,CCG024170.1,CCG026678.1,CCG003639.1,CCG020286.1,CCG003731.1,CCG027133.1,CCG010786.1,CCG003438.1,CCG010116.1,CCG023999.1,CCG025396.1,CCG020100.1,CCG016254.1,CCG016933.1,CCG026666.1,CCG026953.1,CCG001770.1,CCG010622.1,CCG014496.1,CCG003004.1,CCG022996.1,CCG022837.1,CCG016855.3,CCG019678.1,CCG024025.1,CCG021555.1,CCG021334.1,CCG013641.1,CCG005888.1,CCG004862.2,CCG002364.1,CCG016903.1,CCG003495.1,CCG021228.1,CCG000715.1,CCG020651.1,CCG024347.1,CCG015143.1,CCG025131.2,CCG006233.1,CCG002923.2,CCG022994.1,CCG005089.1,CCG002852.1,CCG023127.1,CCG010398.1,CCG012664.1,CCG026809.1,CCG003796.1,CCG006251.1,CCG018349.1,CCG021895.1,CCG001636.1,CCG001285.1,CCG010133.1,CCG013963.1,CCG003707.1,CCG025933.1,CCG013205.1,CCG001928.1,CCG010428.1,CCG004459.2,CCG027365.1,CCG001397.1,CCG004055.1,CCG004084.1,CCG021811.1,CCG018650.1,CCG020318.1,CCG006421.1,CCG023963.3,CCG018478.1,CCG022070.1,CCG008488.1,CCG010663.1,CCG015426.1,CCG024300.1,CCG025419.1,CCG016482.1,CCG025510.1,CCG024804.1,CCG014205.1,CCG026979.1,CCG010363.1,CCG004226.1,CCG023435.1, |
| GO:0003887 | DNA-directed DNA polymerase activity | 25 of 6765 in the list  | 27 of 12752 in the genome  | 0.0083 | CCG021295.1,CCG013722.1,CCG021759.1,CCG004438.1,CCG021948.1,CCG011148.1,CCG016094.1,CCG013353.1,CCG018796.1,CCG012623.1,CCG021949.1,CCG007063.1,CCG004515.1,CCG024289.1,CCG000738.1,CCG001009.1,CCG010378.2,CCG011366.1,CCG015521.1,CCG022428.1,CCG009140.1,CCG009141.1,CCG028505.1,                                                                                                                                                                                                                                                                                                                                                                                                                                                                                                                                                                                                                                                                                                                                                                                                                                                                                                                                                                                                                                                                                                                                                                                                                                                                                                                                                                                                                                     |

|            |             |                         |                            |         |                                                                                                                                                                                                                                                                                                                                                                                                                                                                                                                                                                                                                                                                                                                                                                                                                                                                                                                                                                                                                                                                                                                                                                                                                                                                                                                                                                                                                                                                                                                                                                                                                                                                                                                          |
|------------|-------------|-------------------------|----------------------------|---------|--------------------------------------------------------------------------------------------------------------------------------------------------------------------------------------------------------------------------------------------------------------------------------------------------------------------------------------------------------------------------------------------------------------------------------------------------------------------------------------------------------------------------------------------------------------------------------------------------------------------------------------------------------------------------------------------------------------------------------------------------------------------------------------------------------------------------------------------------------------------------------------------------------------------------------------------------------------------------------------------------------------------------------------------------------------------------------------------------------------------------------------------------------------------------------------------------------------------------------------------------------------------------------------------------------------------------------------------------------------------------------------------------------------------------------------------------------------------------------------------------------------------------------------------------------------------------------------------------------------------------------------------------------------------------------------------------------------------------|
| GO:0003677 | DNA binding | 455 of 6765 in the list | 751 of 12752 in the genome | 0.00831 | CCG003088.1,CCG014253.1,CCG022266.1,CCG006549.1,CCG007349.1,CCG008741.1,CCG022186.1,CCG017609.3,CCG010647.1,CCG018429.1,CCG025685.1,CCG027427.1,CCG007493.1,CCG013625.1,CCG026473.1,CCG004583.4,CCG001177.1,CCG008041.1,CCG009839.1,CCG023752.1,CCG028505.1,CCG005194.1,CCG009970.1,CCG015599.1,CCG014836.1,CCG000213.1,CCG024177.1,CCG000128.1,CCG025208.1,CCG009649.3,CCG012514.1,CCG027196.1,CCG023723.1,CCG017229.1,CCG021436.1,CCG000575.1,CCG016094.1,CCG027183.2,CCG000659.1,CCG000166.1,CCG027127.1,CCG015425.1,CCG013353.1,CCG012623.1,CCG009103.1,CCG004515.1,CCG022447.1,CCG019692.1,CCG022281.1,CCG011465.1,CCG010905.1,CCG004078.1,CCG024143.1,CCG020129.1,CCG010909.1,CCG027186.1,CCG016771.1,CCG011911.1,CCG020537.1,CCG024170.1,CCG024326.1,CCG021295.1,CCG026678.1,CCG017580.1,CCG009980.1,CCG027133.1,CCG022045.1,CCG010649.1,CCG006767.1,CCG019296.1,CCG028568.1,CCG003438.1,CCG006484.1,CCG010378.2,CCG008559.1,CCG027696.1,CCG017760.1,CCG016859.1,CCG010510.1,CCG004402.1,CCG012226.3,CCG024025.1,CCG023468.1,CCG017490.1,CCG000805.1,CCG004862.2,CCG004494.1,CCG002364.1,CCG000133.1,CCG016903.1,CCG013224.2,CCG022217.1,CCG021948.1,CCG011148.1,CCG026228.2,CCG022673.1,CCG020651.1,CCG021054.1,CCG026159.1,CCG005284.1,CCG016749.1,CCG025197.2,CCG005396.1,CCG005088.1,CCG012584.1,CCG024200.1,CCG026455.1,CCG009823.1,CCG024788.1,CCG021456.1,CCG014928.1,CCG004926.1,CCG027580.1,CCG018750.1,CCG024271.1,CCG021045.1,CCG021759.1,CCG009458.1,CCG022496.1,CCG007155.1,CCG011498.1,CCG022772.1,CCG010136.1,CCG022628.1,CCG003310.1,CCG010428.1,CCG024570.2,CCG021503.1,CCG013617.1,CCG001301.1,CCG001431.2,CCG000730.2,CCG010137.1,CCG000209.1,CCG017031.1,CCG000226.1,CCG001341.1,CCG026258.1, |
|------------|-------------|-------------------------|----------------------------|---------|--------------------------------------------------------------------------------------------------------------------------------------------------------------------------------------------------------------------------------------------------------------------------------------------------------------------------------------------------------------------------------------------------------------------------------------------------------------------------------------------------------------------------------------------------------------------------------------------------------------------------------------------------------------------------------------------------------------------------------------------------------------------------------------------------------------------------------------------------------------------------------------------------------------------------------------------------------------------------------------------------------------------------------------------------------------------------------------------------------------------------------------------------------------------------------------------------------------------------------------------------------------------------------------------------------------------------------------------------------------------------------------------------------------------------------------------------------------------------------------------------------------------------------------------------------------------------------------------------------------------------------------------------------------------------------------------------------------------------|

|            |                          |                         |                            |         |                                                                                                                                                                                                                                                                                                                                                                                                                                                                                                                                                                                                                                                                                                                                                                                                                                                                                                                                                                                                                                                                                                                                                                                                                                                                                                                                                                                                                                                                                                                                                                                                                                                                                                                          |
|------------|--------------------------|-------------------------|----------------------------|---------|--------------------------------------------------------------------------------------------------------------------------------------------------------------------------------------------------------------------------------------------------------------------------------------------------------------------------------------------------------------------------------------------------------------------------------------------------------------------------------------------------------------------------------------------------------------------------------------------------------------------------------------------------------------------------------------------------------------------------------------------------------------------------------------------------------------------------------------------------------------------------------------------------------------------------------------------------------------------------------------------------------------------------------------------------------------------------------------------------------------------------------------------------------------------------------------------------------------------------------------------------------------------------------------------------------------------------------------------------------------------------------------------------------------------------------------------------------------------------------------------------------------------------------------------------------------------------------------------------------------------------------------------------------------------------------------------------------------------------|
| GO:0042623 | ATPase activity, coupled | 156 of 6765 in the list | 237 of 12752 in the genome | 0.02989 | CCG018832.1,CCG000855.1,CCG024345.1,CCG007349.1,CCG003545.1,CCG010555.2,CCG000585.1,CCG025989.2,CCG011803.1,CCG007489.1,CCG016913.1,CCG007978.1,CCG019768.1,CCG017683.1,CCG005171.1,CCG019488.1,CCG009702.1,CCG009481.1,CCG021799.1,CCG017637.1,CCG023784.1,CCG016160.1,CCG018570.1,CCG026753.1,CCG001379.1,CCG017503.1,CCG013292.1,CCG008698.1,CCG027183.2,CCG000166.1,CCG006486.1,CCG004078.1,CCG003149.1,CCG020471.1,CCG018799.1,CCG016661.1,CCG019521.1,CCG018472.1,CCG024460.2,CCG024270.1,CCG018583.1,CCG023640.1,CCG027133.1,CCG010786.1,CCG002661.1,CCG025348.1,CCG019619.1,CCG022692.1,CCG003438.1,CCG010116.1,CCG026666.1,CCG023213.1,CCG011369.1,CCG022996.1,CCG016855.3,CCG025937.1,CCG019678.1,CCG017985.2,CCG021334.1,CCG015410.1,CCG002364.1,CCG016903.1,CCG008188.1,CCG007418.1,CCG019789.1,CCG015143.1,CCG006233.1,CCG002923.2,CCG022994.1,CCG005089.1,CCG010398.1,CCG020768.2,CCG003796.1,CCG001636.1,CCG001285.1,CCG012073.1,CCG017693.1,CCG017680.1,CCG008622.1,CCG020167.1,CCG004309.1,CCG013205.1,CCG001928.1,CCG012302.1,CCG015165.1,CCG022918.1,CCG021811.1,CCG018650.1,CCG006284.1,CCG028267.1,CCG019148.1,CCG020871.1,CCG018478.1,CCG019648.1,CCG027261.1,CCG022070.1,CCG010291.1,CCG002038.1,CCG026693.1,CCG010663.1,CCG016979.2,CCG025419.1,CCG024804.1,CCG025510.1,CCG016482.1,CCG024514.1,CCG005924.2,CCG016034.1,CCG001899.1,CCG001940.1,CCG008498.1,CCG017213.1,CCG011615.1,CCG021934.1,CCG010208.1,CCG004308.1,CCG020313.2,CCG020620.1,CCG000392.1,CCG011662.1,CCG001585.1,CCG008489.1,CCG026314.1,CCG022510.1,CCG017627.1,CCG024065.1,CCG008320.1,CCG006572.1,CCG008612.2,CCG015704.1,CCG004576.1,CCG026345.1,CCG026052.1,CCG023674.1,CCG001066.1,CCG024097.1,CCG019866.1,CCG007724.1, |
| GO:0003684 | damaged DNA binding      | 25 of 6765 in the list  | 28 of 12752 in the genome  | 0.03818 | CCG005241.1,CCG000213.1,CCG000929.1,CCG002364.1,CCG004744.1,CCG001808.2,CCG021759.1,CCG001769.1,CCG001083.1,CCG004438.1,CCG005379.2,CCG022772.1,CCG016094.1,CCG024570.2,CCG004515.1,CCG024792.1,CCG007063.1,CCG024289.1,CCG001009.1,CCG012803.2,CCG019488.1,CCG003658.1,CCG012164.1,                                                                                                                                                                                                                                                                                                                                                                                                                                                                                                                                                                                                                                                                                                                                                                                                                                                                                                                                                                                                                                                                                                                                                                                                                                                                                                                                                                                                                                     |

|            |                                          |                          |                             |         |                                                                                                                                                                                                                                                                                                                                                                                                                                                                                                                                                                                                                                                                                                                                                                                                                                                                                                                                                                                                                                                                                                                                                                                                                                                                                                                                                                                                                                                                                                                                                                                                                                                                                                                          |
|------------|------------------------------------------|--------------------------|-----------------------------|---------|--------------------------------------------------------------------------------------------------------------------------------------------------------------------------------------------------------------------------------------------------------------------------------------------------------------------------------------------------------------------------------------------------------------------------------------------------------------------------------------------------------------------------------------------------------------------------------------------------------------------------------------------------------------------------------------------------------------------------------------------------------------------------------------------------------------------------------------------------------------------------------------------------------------------------------------------------------------------------------------------------------------------------------------------------------------------------------------------------------------------------------------------------------------------------------------------------------------------------------------------------------------------------------------------------------------------------------------------------------------------------------------------------------------------------------------------------------------------------------------------------------------------------------------------------------------------------------------------------------------------------------------------------------------------------------------------------------------------------|
| GO:1901363 | heterocyclic compound binding            | 2015 of 6765 in the list | 3612 of 12752 in the genome | 0.0408  | CCG017420.1,CCG024345.1,CCG022266.1,CCG014396.1,CCG004973.1,CCG006549.1,CCG004887.1,CCG007349.1,CCG022186.1,CCG005370.1,CCG016952.1,CCG004595.1,CCG016913.1,CCG027802.1,CCG013723.1,CCG007493.1,CCG026174.1,CCG004839.1,CCG004468.1,CCG023989.1,CCG004583.4,CCG008041.1,CCG015082.1,CCG009839.1,CCG018570.1,CCG026753.1,CCG001040.1,CCG017266.1,CCG004932.1,CCG028198.1,CCG008966.1,CCG016689.2,CCG025208.1,CCG021479.1,CCG023723.1,CCG023381.1,CCG019735.1,CCG016094.1,CCG026871.2,CCG027127.1,CCG019231.1,CCG014955.1,CCG012623.1,CCG022025.2,CCG009103.1,CCG021616.1,CCG027734.1,CCG021911.1,CCG022281.1,CCG010905.1,CCG001159.1,CCG004050.1,CCG013537.1,CCG004450.1,CCG006714.1,CCG021110.1,CCG005145.1,CCG003415.1,CCG019521.1,CCG027636.1,CCG028653.1,CCG004569.1,CCG020537.1,CCG003639.1,CCG003435.1,CCG020286.1,CCG018253.1,CCG000136.1,CCG013109.1,CCG022045.1,CCG006465.1,CCG028568.1,CCG006523.1,CCG021729.1,CCG006484.1,CCG002982.1,CCG016933.1,CCG024437.1,CCG026953.1,CCG012609.1,CCG010622.1,CCG003004.1,CCG012339.1,CCG019678.1,CCG018257.1,CCG021780.1,CCG024025.1,CCG021985.1,CCG007457.1,CCG013641.1,CCG020467.1,CCG016924.1,CCG000732.1,CCG015350.1,CCG000133.1,CCG021948.1,CCG026228.2,CCG003049.1,CCG020651.1,CCG012840.1,CCG001827.1,CCG011097.1,CCG005284.1,CCG004927.1,CCG023848.1,CCG002923.2,CCG005089.1,CCG021137.1,CCG022056.1,CCG010398.1,CCG001876.1,CCG012584.1,CCG015186.1,CCG013465.1,CCG016327.2,CCG026809.1,CCG024200.1,CCG018349.1,CCG008902.1,CCG010024.1,CCG023458.1,CCG009823.1,CCG025096.1,CCG017001.1,CCG021456.1,CCG003520.1,CCG006273.1,CCG004926.1,CCG006928.1,CCG003898.4,CCG019844.1,CCG016182.1,CCG010912.1,CCG004955.1,CCG005524.1,CCG022496.1,CCG008404.1,CCG011498.1, |
| GO:0008137 | NADH dehydrogenase (ubiquinone) activity | 19 of 6765 in the list   | 20 of 12752 in the genome   | 0.04412 | CCG006077.1,CCG023685.1,CCG000102.1,CCG010522.1,CCG011510.1,CCG015780.1,CCG006605.1,CCG011237.1,CCG027472.1,CCG004901.1,CCG027545.1,CCG005111.1,CCG014171.1,CCG020281.1,CCG014053.1,CCG006459.1,CCG023245.1,CCG025163.3,CCG0                                                                                                                                                                                                                                                                                                                                                                                                                                                                                                                                                                                                                                                                                                                                                                                                                                                                                                                                                                                                                                                                                                                                                                                                                                                                                                                                                                                                                                                                                             |

|            |                                                                            |                        |                           |         |                                                                                                                                                                                                                                     |
|------------|----------------------------------------------------------------------------|------------------------|---------------------------|---------|-------------------------------------------------------------------------------------------------------------------------------------------------------------------------------------------------------------------------------------|
| GO:0016655 | oxidoreductase activity, acting on NAD(P)H, quinone or similar compound as | 19 of 6765 in the list | 20 of 12752 in the genome | 0.04412 | CCG006077.1,CCG023685.1,CCG000102.1,CCG010522.1,CCG011510.1,CCG015780.1,CCG006605.1,CCG011237.1,CCG027472.1,CCG004901.1,CCG027545.1,CCG005111.1,CCG014171.1,CCG020281.1,CCG014053.1,CCG006459.1,CCG023245.1,CCG025163.3,CCG017743.1 |
| GO:0050136 | NADH dehydrogenase (quinone) activity                                      | 19 of 6765 in the list | 20 of 12752 in the genome | 0.04412 | CCG006077.1,CCG023685.1,CCG000102.1,CCG010522.1,CCG011510.1,CCG015780.1,CCG006605.1,CCG011237.1,CCG027472.1,CCG004901.1,CCG027545.1,CCG005111.1,CCG014171.1,CCG020281.1,CCG014053.1,CCG006459.1,CCG023245.1,CCG025163.3,CCG0        |

|            |                 |                         |                            |        |                                                                                                                                                                                                                                                                                                                                                                                                                                                                                                                                                                                                                                                                                                                                                                                                                                                                                                                                                                                                                                                                                                                                                                                                                                                                                                                                                                                                                                                                                                                                                                                                                                                                                                                          |
|------------|-----------------|-------------------------|----------------------------|--------|--------------------------------------------------------------------------------------------------------------------------------------------------------------------------------------------------------------------------------------------------------------------------------------------------------------------------------------------------------------------------------------------------------------------------------------------------------------------------------------------------------------------------------------------------------------------------------------------------------------------------------------------------------------------------------------------------------------------------------------------------------------------------------------------------------------------------------------------------------------------------------------------------------------------------------------------------------------------------------------------------------------------------------------------------------------------------------------------------------------------------------------------------------------------------------------------------------------------------------------------------------------------------------------------------------------------------------------------------------------------------------------------------------------------------------------------------------------------------------------------------------------------------------------------------------------------------------------------------------------------------------------------------------------------------------------------------------------------------|
| GO:0016887 | ATPase activity | 195 of 6765 in the list | 307 of 12752 in the genome | 0.0863 | CCG018832.1,CCG000855.1,CCG024345.1,CCG007349.1,CCG003545.1,CCG010555.2,CCG000585.1,CCG025989.2,CCG011803.1,CCG007489.1,CCG016913.1,CCG007978.1,CCG019768.1,CCG017683.1,CCG005171.1,CCG019488.1,CCG009702.1,CCG009481.1,CCG021799.1,CCG017637.1,CCG023784.1,CCG016160.1,CCG018570.1,CCG026753.1,CCG001379.1,CCG017503.1,CCG013292.1,CCG008698.1,CCG027183.2,CCG000166.1,CCG021530.1,CCG006486.1,CCG026987.1,CCG008377.1,CCG018879.1,CCG004078.1,CCG020471.1,CCG003149.1,CCG018350.1,CCG022988.1,CCG018799.1,CCG016661.1,CCG003415.1,CCG019521.1,CCG018472.1,CCG024460.2,CCG018583.1,CCG024270.1,CCG023640.1,CCG027133.1,CCG010786.1,CCG002661.1,CCG012733.1,CCG025348.1,CCG019619.1,CCG022692.1,CCG003438.1,CCG010116.1,CCG016254.1,CCG020100.1,CCG016933.1,CCG026666.1,CCG003004.1,CCG023213.1,CCG011369.1,CCG022996.1,CCG016855.3,CCG025937.1,CCG019678.1,CCG017985.2,CCG021334.1,CCG015410.1,CCG002364.1,CCG016903.1,CCG008188.1,CCG005525.1,CCG021228.1,CCG019329.1,CCG000715.1,CCG007418.1,CCG019789.1,CCG024347.1,CCG015143.1,CCG006233.1,CCG002923.2,CCG022994.1,CCG005089.1,CCG023127.1,CCG010398.1,CCG020768.2,CCG003796.1,CCG018349.1,CCG021895.1,CCG001636.1,CCG001285.1,CCG013745.1,CCG012073.1,CCG017693.1,CCG003816.1,CCG017680.1,CCG008622.1,CCG020167.1,CCG004309.1,CCG010902.1,CCG013205.1,CCG001928.1,CCG012302.1,CCG015165.1,CCG022918.1,CCG025520.1,CCG021811.1,CCG018650.1,CCG006284.1,CCG019148.1,CCG028267.1,CCG020871.1,CCG018478.1,CCG019648.1,CCG027261.1,CCG022070.1,CCG010291.1,CCG002038.1,CCG026693.1,CCG016979.2,CCG010663.1,CCG025419.1,CCG024804.1,CCG025510.1,CCG016482.1,CCG014205.1,CCG026979.1,CCG024514.1,CCG005924.2,CCG004226.1,CCG016034.1,CCG001940.1,CCG001899.1,CCG008498.1, |
|------------|-----------------|-------------------------|----------------------------|--------|--------------------------------------------------------------------------------------------------------------------------------------------------------------------------------------------------------------------------------------------------------------------------------------------------------------------------------------------------------------------------------------------------------------------------------------------------------------------------------------------------------------------------------------------------------------------------------------------------------------------------------------------------------------------------------------------------------------------------------------------------------------------------------------------------------------------------------------------------------------------------------------------------------------------------------------------------------------------------------------------------------------------------------------------------------------------------------------------------------------------------------------------------------------------------------------------------------------------------------------------------------------------------------------------------------------------------------------------------------------------------------------------------------------------------------------------------------------------------------------------------------------------------------------------------------------------------------------------------------------------------------------------------------------------------------------------------------------------------|

|            |                                 |                          |                             |         |                                                                                                                                                                                                                                                                                                                                                                                                                                                                                                                                                                                                                                                                                                                                                                                                                                                                                                                                                                                                                                                                                                                                                                                                                                                                                                                                                                                                                                                                                                                                                                                                                                                                                                                          |
|------------|---------------------------------|--------------------------|-----------------------------|---------|--------------------------------------------------------------------------------------------------------------------------------------------------------------------------------------------------------------------------------------------------------------------------------------------------------------------------------------------------------------------------------------------------------------------------------------------------------------------------------------------------------------------------------------------------------------------------------------------------------------------------------------------------------------------------------------------------------------------------------------------------------------------------------------------------------------------------------------------------------------------------------------------------------------------------------------------------------------------------------------------------------------------------------------------------------------------------------------------------------------------------------------------------------------------------------------------------------------------------------------------------------------------------------------------------------------------------------------------------------------------------------------------------------------------------------------------------------------------------------------------------------------------------------------------------------------------------------------------------------------------------------------------------------------------------------------------------------------------------|
| GO:0097159 | organic cyclic compound binding | 2019 of 6765 in the list | 3629 of 12752 in the genome | 0.09218 | CCG017420.1,CCG024345.1,CCG022266.1,CCG014396.1,CCG004973.1,CCG006549.1,CCG004887.1,CCG007349.1,CCG022186.1,CCG005370.1,CCG016952.1,CCG004595.1,CCG016913.1,CCG027802.1,CCG013723.1,CCG007493.1,CCG026174.1,CCG004839.1,CCG004468.1,CCG023989.1,CCG004583.4,CCG008041.1,CCG015082.1,CCG009839.1,CCG018570.1,CCG026753.1,CCG001040.1,CCG017266.1,CCG004932.1,CCG028198.1,CCG008966.1,CCG016689.2,CCG025208.1,CCG021479.1,CCG023723.1,CCG023381.1,CCG019735.1,CCG016094.1,CCG026871.2,CCG027127.1,CCG019231.1,CCG014955.1,CCG012623.1,CCG022025.2,CCG009103.1,CCG021616.1,CCG027734.1,CCG021911.1,CCG022281.1,CCG010905.1,CCG001159.1,CCG004050.1,CCG013537.1,CCG004450.1,CCG006714.1,CCG021110.1,CCG005145.1,CCG003415.1,CCG019521.1,CCG027636.1,CCG028653.1,CCG004569.1,CCG020537.1,CCG003639.1,CCG003435.1,CCG020286.1,CCG018253.1,CCG000136.1,CCG013109.1,CCG022045.1,CCG006465.1,CCG028568.1,CCG006523.1,CCG021729.1,CCG006484.1,CCG002982.1,CCG016933.1,CCG024437.1,CCG026953.1,CCG012609.1,CCG010622.1,CCG003004.1,CCG012339.1,CCG019678.1,CCG018257.1,CCG021780.1,CCG024025.1,CCG021985.1,CCG007457.1,CCG013641.1,CCG020467.1,CCG016924.1,CCG000732.1,CCG015350.1,CCG000133.1,CCG021948.1,CCG026228.2,CCG003049.1,CCG020651.1,CCG012840.1,CCG001827.1,CCG011097.1,CCG005284.1,CCG004927.1,CCG023848.1,CCG002923.2,CCG005089.1,CCG021137.1,CCG022056.1,CCG010398.1,CCG001876.1,CCG012584.1,CCG015186.1,CCG013465.1,CCG016327.2,CCG026809.1,CCG024200.1,CCG018349.1,CCG008902.1,CCG010024.1,CCG023458.1,CCG009823.1,CCG025096.1,CCG017001.1,CCG021456.1,CCG003520.1,CCG006273.1,CCG004926.1,CCG006928.1,CCG003898.4,CCG019844.1,CCG016182.1,CCG010912.1,CCG004955.1,CCG005524.1,CCG022496.1,CCG008404.1,CCG011498.1, |
| GO:0003954 | NADH dehydrogenase activity     | 20 of 6765 in the list   | 22 of 12752 in the genome   | 0.13376 | CCG006077.1,CCG023685.1,CCG000102.1,CCG010522.1,CCG011510.1,CCG015780.1,CCG019867.2,CCG006605.1,CCG011237.1,CCG027472.1,CCG004901.1,CCG027545.1,CCG005111.1,CCG014171.1,CCG020281.1,CCG014053.1,CCG006459.1,CCG023245.1,CCG0                                                                                                                                                                                                                                                                                                                                                                                                                                                                                                                                                                                                                                                                                                                                                                                                                                                                                                                                                                                                                                                                                                                                                                                                                                                                                                                                                                                                                                                                                             |

|            |                                                        |                         |                            |         |                                                                                                                                                                                                                                                                                                                                                                                                                                                                                                                                                                                                                                                                                                                                                                                                                                                                                                                                                                                                                                                                                                                                                                                                                                                                                                                                                                                                                                                                                                                                                                                                                                                                                                                          |
|------------|--------------------------------------------------------|-------------------------|----------------------------|---------|--------------------------------------------------------------------------------------------------------------------------------------------------------------------------------------------------------------------------------------------------------------------------------------------------------------------------------------------------------------------------------------------------------------------------------------------------------------------------------------------------------------------------------------------------------------------------------------------------------------------------------------------------------------------------------------------------------------------------------------------------------------------------------------------------------------------------------------------------------------------------------------------------------------------------------------------------------------------------------------------------------------------------------------------------------------------------------------------------------------------------------------------------------------------------------------------------------------------------------------------------------------------------------------------------------------------------------------------------------------------------------------------------------------------------------------------------------------------------------------------------------------------------------------------------------------------------------------------------------------------------------------------------------------------------------------------------------------------------|
| GO:0016773 | phosphotransferase activity, alcohol group as acceptor | 264 of 6765 in the list | 431 of 12752 in the genome | 0.22329 | CCG016649.1,CCG023297.1,CCG027737.1,CCG004887.1,CCG016952.1,CCG014419.1,CCG010985.1,CCG026174.1,CCG024745.1,CCG000970.1,CCG014680.1,CCG012558.1,CCG028407.1,CCG017266.1,CCG028198.1,CCG016689.2,CCG021479.1,CCG023381.1,CCG019735.1,CCG015296.1,CCG004225.1,CCG008381.1,CCG021616.1,CCG002047.2,CCG004050.1,CCG013402.1,CCG017473.1,CCG017984.1,CCG019378.3,CCG027636.1,CCG004569.1,CCG024139.1,CCG008040.1,CCG009002.1,CCG011949.1,CCG013345.1,CCG006465.1,CCG006042.2,CCG003248.1,CCG011322.1,CCG023172.1,CCG018494.1,CCG001311.1,CCG023251.1,CCG019493.1,CCG007457.1,CCG021938.1,CCG023331.1,CCG012332.1,CCG025715.1,CCG009687.2,CCG017127.1,CCG008663.1,CCG002957.1,CCG013318.1,CCG011587.1,CCG022214.1,CCG009375.1,CCG015186.1,CCG017701.1,CCG016327.2,CCG006456.1,CCG004903.1,CCG023458.1,CCG023058.2,CCG027943.1,CCG017113.1,CCG011886.1,CCG016095.1,CCG003520.1,CCG006928.1,CCG016738.2,CCG000789.1,CCG025433.1,CCG003554.1,CCG020978.1,CCG008404.1,CCG018201.1,CCG022628.1,CCG021179.1,CCG008287.1,CCG001108.1,CCG004123.1,CCG005531.1,CCG009038.1,CCG025707.1,CCG020837.1,CCG027189.2,CCG024922.1,CCG008307.1,CCG006804.1,CCG014798.2,CCG024790.1,CCG006098.1,CCG028043.1,CCG009177.1,CCG012959.1,CCG000612.1,CCG024595.1,CCG021138.1,CCG008367.1,CCG007833.1,CCG010209.1,CCG002095.1,CCG023126.1,CCG022929.1,CCG025502.1,CCG010872.1,CCG002916.1,CCG016017.1,CCG017299.1,CCG003249.1,CCG013999.1,CCG017481.1,CCG007419.1,CCG002382.1,CCG021143.1,CCG008372.1,CCG025085.1,CCG006173.1,CCG026687.1,CCG020412.1,CCG019119.2,CCG019480.1,CCG025858.1,CCG010316.1,CCG008314.1,CCG011887.1,CCG015971.1,CCG013793.1,CCG026012.1,CCG021641.1,CCG008203.1,CCG011525.1,CCG016998.1,CCG012907.1,CCG022091.1,CCG003981.1, |
| GO:0008094 | DNA-dependent ATPase activity                          | 24 of 6765 in the list  | 28 of 12752 in the genome  | 0.22382 | CCG020869.1,CCG018583.1,CCG002364.1,CCG012073.1,CCG016903.1,CCG015312.2,CCG027133.1,CCG000490.1,CCG007349.1,CCG024804.1,CCG027183.2,CCG000166.1,CCG003438.1,CCG012572.1,CCG022918.1,CCG019488.1,CCG004078.1,CCG006284.1,CCG025937.1,CCG020871.1,CCG018799.1,CCG017213.1,CCG011615.1,                                                                                                                                                                                                                                                                                                                                                                                                                                                                                                                                                                                                                                                                                                                                                                                                                                                                                                                                                                                                                                                                                                                                                                                                                                                                                                                                                                                                                                     |

|            |                                            |                         |                            |         |                                                                                                                                                                                                                                                                                                                                                                                                                                                                                                                                                                                                                                                                                                                                                                                                                                                                                                                                                                                                                                                                                                                                                                                                                                                                                                                                                                                                                                                                                                                                                                                                                                                                                                                          |
|------------|--------------------------------------------|-------------------------|----------------------------|---------|--------------------------------------------------------------------------------------------------------------------------------------------------------------------------------------------------------------------------------------------------------------------------------------------------------------------------------------------------------------------------------------------------------------------------------------------------------------------------------------------------------------------------------------------------------------------------------------------------------------------------------------------------------------------------------------------------------------------------------------------------------------------------------------------------------------------------------------------------------------------------------------------------------------------------------------------------------------------------------------------------------------------------------------------------------------------------------------------------------------------------------------------------------------------------------------------------------------------------------------------------------------------------------------------------------------------------------------------------------------------------------------------------------------------------------------------------------------------------------------------------------------------------------------------------------------------------------------------------------------------------------------------------------------------------------------------------------------------------|
| GO:0016651 | oxidoreductase activity, acting on NAD(P)H | 30 of 6765 in the list  | 37 of 12752 in the genome  | 0.28293 | CCG006077.1,CCG004155.2,CCG005677.1,CCG023685.1,CCG000102.1,CCG018684.1,CCG010522.1,CCG011510.1,CCG015780.1,CCG002790.1,CCG019867.2,CCG022471.1,CCG006605.1,CCG011237.1,CCG027472.1,CCG004595.1,CCG004901.1,CCG027545.1,CCG005111.1,CCG024119.1,CCG014171.1,CCG020281.1,CCG014053.1,CCG022868.1,CCG009674.1,CCG028581.1,CCG023245.1,CCG006                                                                                                                                                                                                                                                                                                                                                                                                                                                                                                                                                                                                                                                                                                                                                                                                                                                                                                                                                                                                                                                                                                                                                                                                                                                                                                                                                                               |
| GO:0004672 | protein kinase activity                    | 208 of 6765 in the list | 336 of 12752 in the genome | 0.42897 | CCG000757.1,CCG002799.1,CCG023297.1,CCG025284.1,CCG027737.1,CCG004887.1,CCG005421.1,CCG025148.1,CCG003589.1,CCG002236.1,CCG028602.1,CCG020372.1,CCG007183.1,CCG016952.1,CCG010985.1,CCG026174.1,CCG006244.2,CCG024745.1,CCG013616.1,CCG009699.2,CCG017266.1,CCG028198.1,CCG016689.2,CCG021479.1,CCG009508.1,CCG019420.2,CCG023381.1,CCG019735.1,CCG015296.1,CCG024301.1,CCG028451.1,CCG018341.1,CCG004225.1,CCG008919.1,CCG008381.1,CCG021616.1,CCG022599.1,CCG023108.1,CCG004050.1,CCG004233.1,CCG013402.1,CCG018202.1,CCG017672.1,CCG017984.1,CCG019378.3,CCG004698.1,CCG027636.1,CCG004569.1,CCG024139.1,CCG004782.1,CCG008040.1,CCG024840.1,CCG021507.1,CCG011947.1,CCG002226.1,CCG011562.1,CCG009002.1,CCG011949.1,CCG013345.1,CCG006465.1,CCG003248.1,CCG018139.1,CCG011322.1,CCG018494.1,CCG017765.1,CCG008098.1,CCG025614.1,CCG001311.1,CCG023251.1,CCG011482.1,CCG020473.1,CCG025250.1,CCG012974.1,CCG023155.1,CCG024960.1,CCG028197.1,CCG013826.1,CCG007457.1,CCG023331.1,CCG004397.1,CCG012332.1,CCG022834.1,CCG010096.1,CCG020326.1,CCG021881.1,CCG028497.1,CCG018960.1,CCG025715.1,CCG009687.2,CCG025054.1,CCG017127.1,CCG010943.1,CCG002957.1,CCG004215.1,CCG011587.1,CCG013403.1,CCG020636.1,CCG000440.1,CCG027239.1,CCG015186.1,CCG016327.2,CCG004903.1,CCG023458.1,CCG014005.1,CCG027943.1,CCG018477.1,CCG017773.1,CCG017113.1,CCG011886.1,CCG016095.1,CCG003520.1,CCG006928.1,CCG016738.2,CCG025433.1,CCG003554.1,CCG020978.1,CCG003498.1,CCG008404.1,CCG018201.1,CCG022628.1,CCG021179.1,CCG026494.1,CCG001108.1,CCG005360.1,CCG001043.1,CCG004123.1,CCG018734.1,CCG005531.1,CCG009038.1,CCG004691.1,CCG025707.1,CCG020837.1,CCG001300.1,CCG027189.2,CCG010631.1,CCG024922.1,CCG018861.1,CCG016878.1, |

|            |                         |                        |                           |         |                                                                                                                                                                                                                                                                                                                                                                                                                                                                                                 |
|------------|-------------------------|------------------------|---------------------------|---------|-------------------------------------------------------------------------------------------------------------------------------------------------------------------------------------------------------------------------------------------------------------------------------------------------------------------------------------------------------------------------------------------------------------------------------------------------------------------------------------------------|
| GO:0034062 | RNA polymerase activity | 40 of 6765 in the list | 53 of 12752 in the genome | 0.50018 | CCG018768.2,CCG021083.1,CCG010797.1,CCG007155.1,CCG001509.1,CCG006767.1,CCG019296.1,CCG005846.1,CCG014840.1,CCG011129.1,CCG015694.1,CCG006484.1,CCG018507.1,CCG015039.1,CCG004224.1,CCG015704.1,CCG023775.1,CCG000489.1,CCG017046.2,CCG000209.1,CCG019541.1,CCG002470.1,CCG006164.1,CCG018617.1,CCG020377.1,CCG008027.1,CCG024392.1,CCG011384.1,CCG025157.1,CCG007856.1,CCG003112.1,CCG027401.1,CCG018243.1,CCG024200.1,CCG023125.1,CCG016776.1,CCG016381.1,CCG000100.1,CCG000000.1,CCG000100.1 |
|------------|-------------------------|------------------------|---------------------------|---------|-------------------------------------------------------------------------------------------------------------------------------------------------------------------------------------------------------------------------------------------------------------------------------------------------------------------------------------------------------------------------------------------------------------------------------------------------------------------------------------------------|

|            |                            |                         |                            |         |                                                                                                                                                                                                                                                                                                                                                                                                                                                                                                                                                                                                                                                                                                                                                                                                                                                                                                                                                                                                                                                                                                                                                                                                                                                                                                                                                                                                                                                                                                                                                                                                                                                                                                                          |
|------------|----------------------------|-------------------------|----------------------------|---------|--------------------------------------------------------------------------------------------------------------------------------------------------------------------------------------------------------------------------------------------------------------------------------------------------------------------------------------------------------------------------------------------------------------------------------------------------------------------------------------------------------------------------------------------------------------------------------------------------------------------------------------------------------------------------------------------------------------------------------------------------------------------------------------------------------------------------------------------------------------------------------------------------------------------------------------------------------------------------------------------------------------------------------------------------------------------------------------------------------------------------------------------------------------------------------------------------------------------------------------------------------------------------------------------------------------------------------------------------------------------------------------------------------------------------------------------------------------------------------------------------------------------------------------------------------------------------------------------------------------------------------------------------------------------------------------------------------------------------|
| GO:0016301 | kinase activity            | 263 of 6765 in the list | 435 of 12752 in the genome | 0.70429 | CCG016649.1,CCG023297.1,CCG027737.1,CCG004887.1,CCG016952.1,CCG014419.1,CCG010985.1,CCG026174.1,CCG024745.1,CCG000970.1,CCG012558.1,CCG017266.1,CCG028198.1,CCG016689.2,CCG021479.1,CCG023381.1,CCG019735.1,CCG015296.1,CCG004225.1,CCG008381.1,CCG021616.1,CCG002047.2,CCG004050.1,CCG013402.1,CCG021110.1,CCG017984.1,CCG019378.3,CCG027636.1,CCG004569.1,CCG024139.1,CCG008040.1,CCG009002.1,CCG011949.1,CCG013345.1,CCG006465.1,CCG003248.1,CCG011322.1,CCG018494.1,CCG001311.1,CCG023251.1,CCG019493.1,CCG007457.1,CCG021938.1,CCG023331.1,CCG012332.1,CCG025715.1,CCG009687.2,CCG017127.1,CCG002957.1,CCG013318.1,CCG011587.1,CCG022214.1,CCG014116.1,CCG017111.1,CCG015186.1,CCG017701.1,CCG016327.2,CCG006456.1,CCG004903.1,CCG023458.1,CCG023058.2,CCG027943.1,CCG017113.1,CCG011886.1,CCG016095.1,CCG003520.1,CCG006928.1,CCG016738.2,CCG000789.1,CCG025433.1,CCG003554.1,CCG020978.1,CCG008404.1,CCG018201.1,CCG006529.1,CCG022628.1,CCG021179.1,CCG008287.1,CCG001108.1,CCG004123.1,CCG005531.1,CCG006431.1,CCG009038.1,CCG025707.1,CCG020837.1,CCG027189.2,CCG024922.1,CCG008307.1,CCG006804.1,CCG014798.2,CCG024790.1,CCG006098.1,CCG028043.1,CCG009177.1,CCG012959.1,CCG018589.1,CCG000612.1,CCG024595.1,CCG021138.1,CCG020616.1,CCG008367.1,CCG007833.1,CCG010209.1,CCG017995.1,CCG002095.1,CCG023126.1,CCG022929.1,CCG025502.1,CCG010872.1,CCG002916.1,CCG016017.1,CCG017299.1,CCG003249.1,CCG013999.1,CCG007417.1,CCG017481.1,CCG007419.1,CCG002382.1,CCG021143.1,CCG008372.1,CCG025085.1,CCG006173.1,CCG026687.1,CCG020412.1,CCG019119.2,CCG019480.1,CCG010316.1,CCG008314.1,CCG011887.1,CCG015971.1,CCG013793.1,CCG026012.1,CCG021641.1,CCG011525.1,CCG016998.1,CCG012907.1,CCG022091.1,CCG003981.1, |
| GO:0008408 | 3'-5' exonuclease activity | 14 of 6765 in the list  | 15 of 12752 in the genome  | 0.80583 | CCG021342.1,CCG023989.1,CCG013465.1,CCG003750.1,CCG005524.1,CCG001461.1,CCG001598.1,CCG018245.1,CCG018917.1,CCG010435.1,CCG004448.2,CCG000806.1,CCG026612.1,CCG007690                                                                                                                                                                                                                                                                                                                                                                                                                                                                                                                                                                                                                                                                                                                                                                                                                                                                                                                                                                                                                                                                                                                                                                                                                                                                                                                                                                                                                                                                                                                                                    |

|            |                                     |                        |                            |         |                                                                                                                                                                                                                                                                                                                                                                                                                                                                                                                                                                                                                                                                                                                                                                                                                                                                                                                    |
|------------|-------------------------------------|------------------------|----------------------------|---------|--------------------------------------------------------------------------------------------------------------------------------------------------------------------------------------------------------------------------------------------------------------------------------------------------------------------------------------------------------------------------------------------------------------------------------------------------------------------------------------------------------------------------------------------------------------------------------------------------------------------------------------------------------------------------------------------------------------------------------------------------------------------------------------------------------------------------------------------------------------------------------------------------------------------|
| GO:0016791 | phosphatase activity                | 74 of 6765 in the list | 109 of 12752 in the genome | 0.85506 | CCG016852.1,CCG024246.1,CCG007874.3,CCG010014.1,CCG024006.1,CCG009398.1,CCG026143.1,CCG002687.2,CCG008725.1,CCG022131.1,CCG015981.1,CCG015077.1,CCG011683.1,CCG027539.1,CCG007485.1,CCG001788.1,CCG001051.1,CCG003693.1,CCG026495.1,CCG028615.1,CCG003362.1,CCG026300.1,CCG007358.1,CCG013007.1,CCG022132.1,CCG006691.1,CCG021178.1,CCG012841.1,CCG014372.1,CCG017616.1,CCG008081.1,CCG006593.1,CCG010776.1,CCG020055.1,CCG026212.1,CCG008411.1,CCG002156.2,CCG021496.1,CCG012754.1,CCG022129.1,CCG004206.1,CCG013128.1,CCG008194.1,CCG004212.1,CCG021269.1,CCG020010.1,CCG024004.1,CCG016851.1,CCG011382.1,CCG021890.1,CCG022627.1,CCG004101.1,CCG023734.1,CCG016850.2,CCG012046.1,CCG016460.1,CCG000839.1,CCG013101.1,CCG007177.1,CCG003394.1,CCG023799.1,CCG015982.1,CCG002105.1,CCG006884.1,CCG021369.1,CCG008652.1,CCG014945.1,CCG000926.1,CCG018688.1,CCG021617.1,CCG022130.1,CCG020784.1,CCG012377.1,CCG019 |
| GO:0004721 | phosphoprotein phosphatase activity | 48 of 6765 in the list | 67 of 12752 in the genome  | 1       | CCG002156.2,CCG008411.1,CCG024246.1,CCG007874.3,CCG021496.1,CCG012754.1,CCG009398.1,CCG013128.1,CCG021269.1,CCG004212.1,CCG008194.1,CCG020010.1,CCG026143.1,CCG011382.1,CCG002687.2,CCG004101.1,CCG022627.1,CCG015077.1,CCG012046.1,CCG016460.1,CCG000839.1,CCG027539.1,CCG007485.1,CCG001788.1,CCG001051.1,CCG003693.1,CCG013101.1,CCG007177.1,CCG028615.1,CCG003362.1,CCG026300.1,CCG013007.1,CCG007358.1,CCG006691.1,CCG002105.1,CCG021178.1,CCG006884.1,CCG021369.1,CCG014945.1,CCG000926.1,CCG018688.1,CCG008081.1,CCG021617.1,CCG010776.1,CCG020055.1,CCG012377.1,CCG020869.1,CCG012073.1,CCG027133.1,CCG000490.1,CCG007349.1,CCG024804.1,CCG016409.1,CCG000777.1,CCG003402.1,CCG026662.1,CCG015082.1,CCG006284.1,CCG000776.1,CCG018799.1,CCG020871.1,CCG018472.1                                                                                                                                            |
| GO:0003678 | DNA helicase activity               | 16 of 6765 in the list | 18 of 12752 in the genome  | 1       | CCG020869.1,CCG012073.1,CCG027133.1,CCG000490.1,CCG007349.1,CCG024804.1,CCG016409.1,CCG000777.1,CCG003402.1,CCG026662.1,CCG015082.1,CCG006284.1,CCG000776.1,CCG018799.1,CCG020871.1,CCG018472.1                                                                                                                                                                                                                                                                                                                                                                                                                                                                                                                                                                                                                                                                                                                    |
| GO:0051213 | dioxygenase activity                | 30 of 6765 in the list | 39 of 12752 in the genome  | 1       | CCG027502.1,CCG009496.1,CCG025320.1,CCG021468.1,CCG026331.1,CCG021695.1,CCG009139.1,CCG019431.1,CCG025465.1,CCG018907.1,CCG020559.1,CCG001266.1,CCG008895.1,CCG002783.1,CCG020227.1,CCG021732.1,CCG002399.1,CCG006994.1,CCG011789.1,CCG000895.1,CCG023114.1,CCG007759.1,CCG011721.1,CCG011722.1,CCG008713.2,CCG015802.1,CCG000730.2,CCG008                                                                                                                                                                                                                                                                                                                                                                                                                                                                                                                                                                         |

|            |                                                                                                                                                                                                   |                        |                           |   |                                                                                                                                                                                                                                                                         |
|------------|---------------------------------------------------------------------------------------------------------------------------------------------------------------------------------------------------|------------------------|---------------------------|---|-------------------------------------------------------------------------------------------------------------------------------------------------------------------------------------------------------------------------------------------------------------------------|
| GO:0016706 | oxidoreductase activity, acting on paired donors, with incorporation or reduction of molecular oxygen, 2-oxoglutarate as one donor, and incorporation of one atom each of oxygen into both donors | 22 of 6765 in the list | 27 of 12752 in the genome | 1 | CCG027502.1,CCG009496.1,CCG025320.1,CCG021468.1,CCG026331.1,CCG021695.1,CCG009139.1,CCG019431.1,CCG020559.1,CCG008895.1,CCG002783.1,CCG020227.1,CCG021732.1,CCG002399.1,CCG000895.1,CCG023114.1,CCG007759.1,CCG008713.2,CCG015802.1,CCG000730.2,CCG008345.2,CCG021947.1 |
|------------|---------------------------------------------------------------------------------------------------------------------------------------------------------------------------------------------------|------------------------|---------------------------|---|-------------------------------------------------------------------------------------------------------------------------------------------------------------------------------------------------------------------------------------------------------------------------|

|            |                      |                          |                             |   |                                                                                                                                                                                                                                                                                                                                                                                                                                                                                                                                                                                                                                                                                                                                                                                                                                                                                                                                                                                                                                                                                                                                                                                                                                                                                                                                                                                                                                                                                                                                                                                                                                                                                                                          |
|------------|----------------------|--------------------------|-----------------------------|---|--------------------------------------------------------------------------------------------------------------------------------------------------------------------------------------------------------------------------------------------------------------------------------------------------------------------------------------------------------------------------------------------------------------------------------------------------------------------------------------------------------------------------------------------------------------------------------------------------------------------------------------------------------------------------------------------------------------------------------------------------------------------------------------------------------------------------------------------------------------------------------------------------------------------------------------------------------------------------------------------------------------------------------------------------------------------------------------------------------------------------------------------------------------------------------------------------------------------------------------------------------------------------------------------------------------------------------------------------------------------------------------------------------------------------------------------------------------------------------------------------------------------------------------------------------------------------------------------------------------------------------------------------------------------------------------------------------------------------|
| GO:0003676 | nucleic acid binding | 1139 of 6765 in the list | 2036 of 12752 in the genome | 1 | CCG022266.1,CCG006549.1,CCG007349.1,CCG022186.1,CCG016913.1,CCG013723.1,CCG007493.1,CCG004839.1,CCG004468.1,CCG023989.1,CCG004583.4,CCG008041.1,CCG009839.1,CCG018570.1,CCG026753.1,CCG001040.1,CCG004932.1,CCG008966.1,CCG025208.1,CCG023723.1,CCG016094.1,CCG026871.2,CCG027127.1,CCG019231.1,CCG012623.1,CCG009103.1,CCG022281.1,CCG010905.1,CCG001159.1,CCG013537.1,CCG004450.1,CCG006714.1,CCG005145.1,CCG019521.1,CCG028653.1,CCG020537.1,CCG003435.1,CCG000136.1,CCG022045.1,CCG028568.1,CCG006523.1,CCG021729.1,CCG006484.1,CCG024437.1,CCG012609.1,CCG021780.1,CCG024025.1,CCG021985.1,CCG020467.1,CCG015350.1,CCG000133.1,CCG021948.1,CCG026228.2,CCG020651.1,CCG001827.1,CCG005284.1,CCG004927.1,CCG023848.1,CCG002923.2,CCG021137.1,CCG010398.1,CCG012584.1,CCG013465.1,CCG024200.1,CCG010024.1,CCG009823.1,CCG017001.1,CCG021456.1,CCG004926.1,CCG003898.4,CCG016182.1,CCG010912.1,CCG004955.1,CCG005524.1,CCG022496.1,CCG011498.1,CCG010136.1,CCG025339.1,CCG001928.1,CCG021765.1,CCG010863.1,CCG012442.1,CCG021503.1,CCG015407.1,CCG006761.1,CCG026483.2,CCG009599.1,CCG000730.2,CCG000209.1,CCG001395.1,CCG016557.1,CCG006313.1,CCG008833.1,CCG005244.1,CCG002106.1,CCG018168.1,CCG000109.1,CCG026242.1,CCG004886.1,CCG026788.1,CCG008142.1,CCG017891.1,CCG027343.1,CCG008498.1,CCG026230.1,CCG017184.1,CCG010797.1,CCG010138.1,CCG026259.1,CCG005635.1,CCG021221.1,CCG005442.1,CCG003839.2,CCG000593.1,CCG014982.1,CCG006572.1,CCG019325.1,CCG010655.1,CCG010684.1,CCG024058.1,CCG010163.1,CCG012837.1,CCG012229.1,CCG018742.1,CCG008031.1,CCG021933.1,CCG015312.2,CCG001434.1,CCG000490.1,CCG020724.1,CCG027197.1,CCG025157.1,CCG013218.2,CCG017999.1,CCG022674.1,CCG013414.2,CCG024461.1,CCG019520.1, |
|------------|----------------------|--------------------------|-----------------------------|---|--------------------------------------------------------------------------------------------------------------------------------------------------------------------------------------------------------------------------------------------------------------------------------------------------------------------------------------------------------------------------------------------------------------------------------------------------------------------------------------------------------------------------------------------------------------------------------------------------------------------------------------------------------------------------------------------------------------------------------------------------------------------------------------------------------------------------------------------------------------------------------------------------------------------------------------------------------------------------------------------------------------------------------------------------------------------------------------------------------------------------------------------------------------------------------------------------------------------------------------------------------------------------------------------------------------------------------------------------------------------------------------------------------------------------------------------------------------------------------------------------------------------------------------------------------------------------------------------------------------------------------------------------------------------------------------------------------------------------|

|            |                                |                          |                             |   |                                                                                                                                                                                                                                                                                                                                                                                                                                                                                                                                                                                                                                                                                                                                                                                                                                                                                                                                                                                                                                                                                                                                                                                                                                                                                                                                                                                                                                                                                                                                                                                                                                                                                                                          |
|------------|--------------------------------|--------------------------|-----------------------------|---|--------------------------------------------------------------------------------------------------------------------------------------------------------------------------------------------------------------------------------------------------------------------------------------------------------------------------------------------------------------------------------------------------------------------------------------------------------------------------------------------------------------------------------------------------------------------------------------------------------------------------------------------------------------------------------------------------------------------------------------------------------------------------------------------------------------------------------------------------------------------------------------------------------------------------------------------------------------------------------------------------------------------------------------------------------------------------------------------------------------------------------------------------------------------------------------------------------------------------------------------------------------------------------------------------------------------------------------------------------------------------------------------------------------------------------------------------------------------------------------------------------------------------------------------------------------------------------------------------------------------------------------------------------------------------------------------------------------------------|
| GO:0005515 | protein binding                | 1697 of 6765 in the list | 3070 of 12752 in the genome | 1 | CCG020201.1,CCG010101.1,CCG017415.3,CCG005655.1,CCG010869.1,CCG014340.1,CCG018854.1,CCG014041.1,CCG004973.1,CCG016555.1,CCG004887.1,CCG008767.3,CCG015641.1,CCG012898.1,CCG010849.1,CCG012726.1,CCG024240.1,CCG016736.1,CCG016259.1,CCG003587.1,CCG007679.1,CCG013301.1,CCG011649.1,CCG016666.1,CCG013001.1,CCG000039.1,CCG020406.1,CCG026360.1,CCG028407.1,CCG001040.1,CCG017266.1,CCG028198.1,CCG017078.1,CCG011003.1,CCG025583.1,CCG007810.2,CCG015101.1,CCG027651.2,CCG026915.1,CCG021742.1,CCG019231.1,CCG016750.1,CCG014944.1,CCG013531.1,CCG022824.1,CCG021911.1,CCG005738.1,CCG008270.1,CCG002184.1,CCG013308.1,CCG023579.1,CCG017390.1,CCG009723.1,CCG004254.1,CCG027473.1,CCG027056.1,CCG028022.1,CCG014850.1,CCG004132.1,CCG020988.1,CCG026982.1,CCG005191.1,CCG002461.1,CCG005749.1,CCG003119.1,CCG013274.1,CCG023770.1,CCG019571.1,CCG020864.1,CCG027345.2,CCG018788.1,CCG002982.1,CCG012083.1,CCG005913.1,CCG025512.1,CCG010168.1,CCG014201.1,CCG003791.1,CCG020898.1,CCG023464.1,CCG002435.1,CCG001579.1,CCG016924.1,CCG003317.1,CCG008135.1,CCG008656.1,CCG000822.1,CCG027463.1,CCG009766.1,CCG002474.1,CCG003049.1,CCG019647.1,CCG002923.2,CCG007371.2,CCG015186.1,CCG012023.1,CCG026947.1,CCG007242.1,CCG028454.1,CCG023458.1,CCG002058.1,CCG016602.1,CCG021456.1,CCG027357.1,CCG003520.1,CCG006273.1,CCG004926.1,CCG019942.1,CCG011703.1,CCG003898.4,CCG010912.1,CCG013528.1,CCG007874.3,CCG011370.1,CCG013640.1,CCG024252.1,CCG017128.2,CCG019635.1,CCG008404.1,CCG007356.1,CCG022449.1,CCG000385.1,CCG014059.1,CCG003273.1,CCG011144.1,CCG022370.1,CCG009038.1,CCG000019.1,CCG007750.2,CCG013939.1,CCG028468.1,CCG000730.2,CCG024358.1,CCG021441.1,CCG021093.1,CCG010139.1,CCG012351.1,CCG011598.1, |
| GO:0043566 | structure-specific DNA binding | 15 of 6765 in the list   | 17 of 12752 in the genome   | 1 | CCG017444.1,CCG027067.1,CCG006220.1,CCG013625.1,CCG003863.1,CCG005395.1,CCG017906.1,CCG003518.3,CCG020156.1,CCG004402.1,CCG022628.1,CCG004332.1,CCG005284.1,CCG012315                                                                                                                                                                                                                                                                                                                                                                                                                                                                                                                                                                                                                                                                                                                                                                                                                                                                                                                                                                                                                                                                                                                                                                                                                                                                                                                                                                                                                                                                                                                                                    |

|            |                                                                     |                        |                           |   |                                                                                                                                                                                                                                                                                                                                            |
|------------|---------------------------------------------------------------------|------------------------|---------------------------|---|--------------------------------------------------------------------------------------------------------------------------------------------------------------------------------------------------------------------------------------------------------------------------------------------------------------------------------------------|
| GO:0003725 | double-stranded RNA binding                                         | 19 of 6765 in the list | 23 of 12752 in the genome | 1 | CCG001040.1,CCG003435.1,CCG007043.1,CCG015406.1,CCG008188.1,CCG016127.1,CCG010445.1,CCG007411.1,CCG002449.1,CCG017905.1,CCG016290.1,CCG018531.1,CCG020685.1,CCG010155.2,CCG013537.1,CCG019674.1,CCG019500.1,CCG013291.2,CCG0                                                                                                               |
| GO:0016278 | lysine N-methyltransferase activity                                 | 12 of 6765 in the list | 13 of 12752 in the genome | 1 | CCG005108.1,CCG012083.1,CCG017377.1,CCG001369.2,CCG002140.1,CCG005153.1,CCG024298.1,CCG025991.2,CCG005355.1,CCG028009.1,CCG015398.1,CCG013859.1                                                                                                                                                                                            |
| GO:0016279 | protein-lysine N-methyltransferase activity                         | 12 of 6765 in the list | 13 of 12752 in the genome | 1 | CCG005108.1,CCG012083.1,CCG017377.1,CCG001369.2,CCG002140.1,CCG005153.1,CCG024298.1,CCG025991.2,CCG005355.1,CCG028009.1,CCG015398.1,CCG013859.1                                                                                                                                                                                            |
| GO:0018024 | histone-lysine N-methyltransferase activity                         | 12 of 6765 in the list | 13 of 12752 in the genome | 1 | CCG005108.1,CCG012083.1,CCG017377.1,CCG001369.2,CCG002140.1,CCG005153.1,CCG024298.1,CCG025991.2,CCG005355.1,CCG028009.1,CCG015398.1,CCG013859.1                                                                                                                                                                                            |
| GO:0042054 | histone methyltransferase activity                                  | 12 of 6765 in the list | 13 of 12752 in the genome | 1 | CCG005108.1,CCG012083.1,CCG017377.1,CCG001369.2,CCG002140.1,CCG005153.1,CCG024298.1,CCG025991.2,CCG005355.1,CCG028009.1,CCG015398.1,CCG013859.1                                                                                                                                                                                            |
| GO:0016538 | cyclin-dependent protein serine/threonine kinase regulator activity | 9 of 6765 in the list  | 9 of 12752 in the genome  | 1 | CCG022393.1,CCG008308.1,CCG006063.1,CCG004222.1,CCG014461.1,CCG010489.1,CCG027928.1,CCG027505.1,CCG025057.1                                                                                                                                                                                                                                |
| GO:0004527 | exonuclease activity                                                | 28 of 6765 in the list | 37 of 12752 in the genome | 1 | CCG021342.1,CCG005594.1,CCG020448.1,CCG003750.1,CCG005524.1,CCG019573.1,CCG018917.1,CCG010435.1,CCG005481.1,CCG003345.1,CCG016079.1,CCG007690.1,CCG012728.1,CCG013465.1,CCG023989.1,CCG001461.1,CCG023205.1,CCG012662.1,CCG001598.1,CCG002067.1,CCG019436.1,CCG022517.1,CCG001803.4,CCG018245.1,CCG004448.2,CCG000806.1,CCG026612.1,CCG017 |

|            |                                       |                        |                            |   |                                                                                                                                                                                                                                                                                                                                                                                                                                                                                                                                                                                                                                                                                                                                                                                                                                                                                                                                                                                                                                                                                                                                                                                                        |
|------------|---------------------------------------|------------------------|----------------------------|---|--------------------------------------------------------------------------------------------------------------------------------------------------------------------------------------------------------------------------------------------------------------------------------------------------------------------------------------------------------------------------------------------------------------------------------------------------------------------------------------------------------------------------------------------------------------------------------------------------------------------------------------------------------------------------------------------------------------------------------------------------------------------------------------------------------------------------------------------------------------------------------------------------------------------------------------------------------------------------------------------------------------------------------------------------------------------------------------------------------------------------------------------------------------------------------------------------------|
| GO:0042578 | phosphoric ester hydrolase activity   | 97 of 6765 in the list | 152 of 12752 in the genome | 1 | CCG010628.1,CCG021023.1,CCG016852.1,CCG024246.1,CCG007874.3,CCG017772.1,CCG008603.1,CCG010014.1,CCG024006.1,CCG009398.1,CCG026143.1,CCG002687.2,CCG020803.1,CCG008725.1,CCG022131.1,CCG015130.1,CCG015981.1,CCG025387.1,CCG015077.1,CCG001759.1,CCG011683.1,CCG027539.1,CCG007485.1,CCG001788.1,CCG001051.1,CCG003693.1,CCG026495.1,CCG028615.1,CCG003362.1,CCG026300.1,CCG007358.1,CCG013007.1,CCG022132.1,CCG006691.1,CCG021178.1,CCG010255.1,CCG012841.1,CCG014372.1,CCG017616.1,CCG008081.1,CCG006593.1,CCG006013.1,CCG006482.1,CCG010776.1,CCG020055.1,CCG005070.1,CCG026212.1,CCG002156.2,CCG008411.1,CCG021496.1,CCG012754.1,CCG028418.1,CCG014647.1,CCG022129.1,CCG001012.1,CCG004206.1,CCG013128.1,CCG021269.1,CCG008194.1,CCG004212.1,CCG020010.1,CCG017043.1,CCG024004.1,CCG016851.1,CCG011382.1,CCG021890.1,CCG013139.1,CCG004101.1,CCG022627.1,CCG010257.1,CCG023734.1,CCG016850.2,CCG012046.1,CCG002520.1,CCG016460.1,CCG000839.1,CCG013101.1,CCG007177.1,CCG003394.1,CCG017798.1,CCG023799.1,CCG015982.1,CCG002105.1,CCG011074.1,CCG006884.1,CCG021369.1,CCG008652.1,CCG014945.1,CCG000926.1,CCG018688.1,CCG021617.1,CCG022130.1,CCG026695.1,CCG020784.1,CCG012377.1,CCG025932.1,CCG019 |
| GO:0004725 | protein tyrosine phosphatase activity | 36 of 6765 in the list | 50 of 12752 in the genome  | 1 | CCG002156.2,CCG008411.1,CCG024246.1,CCG007874.3,CCG021496.1,CCG012754.1,CCG009398.1,CCG013128.1,CCG008194.1,CCG020010.1,CCG026143.1,CCG002687.2,CCG004101.1,CCG015077.1,CCG012046.1,CCG016460.1,CCG000839.1,CCG001788.1,CCG001051.1,CCG013101.1,CCG007177.1,CCG026300.1,CCG013007.1,CCG007358.1,CCG006691.1,CCG002105.1,CCG021178.1,CCG021369.1,CCG014945.1,CCG000926.1,CCG008081.1,CCG021617.1,CCG020055.1,CCG010776.1,CCG012377.1,CCG019843.1                                                                                                                                                                                                                                                                                                                                                                                                                                                                                                                                                                                                                                                                                                                                                        |

|            |                                                |                         |                            |   |                                                                                                                                                                                                                                                                                                                                                                                                                                                                                                                                                                                                                                                                                                                                                                                                                                                                                                                                                                                                                                                                                                                                                                                                                                                                                                                                                                                                                                                                                                                                                                                                           |
|------------|------------------------------------------------|-------------------------|----------------------------|---|-----------------------------------------------------------------------------------------------------------------------------------------------------------------------------------------------------------------------------------------------------------------------------------------------------------------------------------------------------------------------------------------------------------------------------------------------------------------------------------------------------------------------------------------------------------------------------------------------------------------------------------------------------------------------------------------------------------------------------------------------------------------------------------------------------------------------------------------------------------------------------------------------------------------------------------------------------------------------------------------------------------------------------------------------------------------------------------------------------------------------------------------------------------------------------------------------------------------------------------------------------------------------------------------------------------------------------------------------------------------------------------------------------------------------------------------------------------------------------------------------------------------------------------------------------------------------------------------------------------|
| GO:0004674 | protein<br>serine/threonine<br>kinase activity | 132 of 6765 in the list | 214 of 12752 in the genome | 1 | CCG025284.1,CCG027737.1,CCG005421.1,CCG028602.1,CCG020372.1,CCG016952.1,CCG010985.1,CCG006244.2,CCG024745.1,CCG013616.1,CCG009699.2,CCG017266.1,CCG016689.2,CCG019420.2,CCG023381.1,CCG019735.1,CCG015296.1,CCG024301.1,CCG028451.1,CCG018341.1,CCG004225.1,CCG008919.1,CCG021616.1,CCG023108.1,CCG004050.1,CCG004233.1,CCG018202.1,CCG017672.1,CCG017984.1,CCG004698.1,CCG027636.1,CCG004569.1,CCG004782.1,CCG024840.1,CCG021507.1,CCG011947.1,CCG002226.1,CCG011562.1,CCG009002.1,CCG013345.1,CCG006465.1,CCG008098.1,CCG025614.1,CCG001311.1,CCG020473.1,CCG012974.1,CCG023155.1,CCG028197.1,CCG013826.1,CCG007457.1,CCG010096.1,CCG020326.1,CCG028497.1,CCG009687.2,CCG025054.1,CCG017127.1,CCG010943.1,CCG004215.1,CCG013403.1,CCG011587.1,CCG020636.1,CCG015186.1,CCG004903.1,CCG023458.1,CCG018477.1,CCG017773.1,CCG017113.1,CCG011886.1,CCG016095.1,CCG006928.1,CCG022628.1,CCG021179.1,CCG026494.1,CCG005360.1,CCG004123.1,CCG018734.1,CCG005531.1,CCG009038.1,CCG004691.1,CCG025707.1,CCG020837.1,CCG027189.2,CCG001300.1,CCG024922.1,CCG016878.1,CCG008307.1,CCG014798.2,CCG028075.1,CCG024790.1,CCG015969.1,CCG003300.2,CCG000641.1,CCG007011.1,CCG020520.1,CCG021138.1,CCG018181.1,CCG024595.1,CCG008367.1,CCG010209.1,CCG002095.1,CCG023126.1,CCG010872.1,CCG025502.1,CCG010025.1,CCG017481.1,CCG017620.1,CCG007419.1,CCG025085.1,CCG008372.1,CCG021143.1,CCG017519.1,CCG013395.1,CCG017400.1,CCG006173.1,CCG018830.1,CCG005789.1,CCG020412.1,CCG007520.1,CCG009209.1,CCG006660.1,CCG011887.1,CCG015971.1,CCG013793.1,CCG021641.1,CCG026012.1,CCG001831.1,CCG011525.1,CCG016998.1,CCG012907 |
|------------|------------------------------------------------|-------------------------|----------------------------|---|-----------------------------------------------------------------------------------------------------------------------------------------------------------------------------------------------------------------------------------------------------------------------------------------------------------------------------------------------------------------------------------------------------------------------------------------------------------------------------------------------------------------------------------------------------------------------------------------------------------------------------------------------------------------------------------------------------------------------------------------------------------------------------------------------------------------------------------------------------------------------------------------------------------------------------------------------------------------------------------------------------------------------------------------------------------------------------------------------------------------------------------------------------------------------------------------------------------------------------------------------------------------------------------------------------------------------------------------------------------------------------------------------------------------------------------------------------------------------------------------------------------------------------------------------------------------------------------------------------------|

|            |                            |                        |                           |   |                                                                                                                                                                                                                                                                                                                                                                                                                                                                                                                                                                                                                                                                                                 |
|------------|----------------------------|------------------------|---------------------------|---|-------------------------------------------------------------------------------------------------------------------------------------------------------------------------------------------------------------------------------------------------------------------------------------------------------------------------------------------------------------------------------------------------------------------------------------------------------------------------------------------------------------------------------------------------------------------------------------------------------------------------------------------------------------------------------------------------|
| GO:0016853 | isomerase activity         | 56 of 6765 in the list | 84 of 12752 in the genome | 1 | CCG021998.1,CCG014946.1,CCG015268.1,CCG016201.1,CCG019389.1,CCG010373.1,CCG008437.1,CCG015511.1,CCG017706.1,CCG025948.4,CCG021889.1,CCG001501.1,CCG018730.1,CCG000431.1,CCG018076.1,CCG003605.1,CCG003438.1,CCG009574.1,CCG020504.1,CCG024517.1,CCG022918.1,CCG006203.1,CCG019292.1,CCG007750.2,CCG020589.1,CCG012166.1,CCG018480.1,CCG019405.1,CCG003748.1,CCG011681.1,CCG022072.1,CCG001102.1,CCG016557.1,CCG002307.1,CCG015580.1,CCG017797.1,CCG002792.1,CCG007023.1,CCG027183.2,CCG006264.1,CCG000166.1,CCG016653.1,CCG007771.1,CCG018423.1,CCG008972.1,CCG023757.1,CCG028305.1,CCG003001.1,CCG000444.1,CCG011971.1,CCG017330.1,CCG026827.1,CCG014174.1,CCG011615.1,CCG018019.1,CCG028652.1 |
| GO:0004003 | ATP-dependent DNA helicase | 10 of 6765 in the list | 11 of 12752 in the genome | 1 | CCG020869.1,CCG012073.1,CCG027133.1,CCG000490.1,CCG007349.1,CCG006284.1,CCG020871.1,CCG024804.1,CCG018799.1,CCG028652.1                                                                                                                                                                                                                                                                                                                                                                                                                                                                                                                                                                         |

|            |                                                 |                         |                            |   |                                                                                                                                                                                                                                                                                                                                                                                                                                                                                                                                                                                                                                                                                                                                                                                                                                                                                                                                                                                                                                                                                                                                                                                                                                                                                                                                                                                                                                                                                                                                                                                                                                                                                                                          |
|------------|-------------------------------------------------|-------------------------|----------------------------|---|--------------------------------------------------------------------------------------------------------------------------------------------------------------------------------------------------------------------------------------------------------------------------------------------------------------------------------------------------------------------------------------------------------------------------------------------------------------------------------------------------------------------------------------------------------------------------------------------------------------------------------------------------------------------------------------------------------------------------------------------------------------------------------------------------------------------------------------------------------------------------------------------------------------------------------------------------------------------------------------------------------------------------------------------------------------------------------------------------------------------------------------------------------------------------------------------------------------------------------------------------------------------------------------------------------------------------------------------------------------------------------------------------------------------------------------------------------------------------------------------------------------------------------------------------------------------------------------------------------------------------------------------------------------------------------------------------------------------------|
| GO:0016788 | hydrolase activity,<br>acting on ester<br>bonds | 259 of 6765 in the list | 443 of 12752 in the genome | 1 | CCG010628.1,CCG027300.1,CCG008603.1,CCG000746.1,CCG002687.2,CCG012875.1,CCG020685.1,CCG022635.1,CCG023989.1,CCG023173.1,CCG013059.1,CCG025836.1,CCG027119.1,CCG001788.1,CCG001040.1,CCG026495.1,CCG003362.1,CCG026300.1,CCG001894.1,CCG017255.1,CCG025833.1,CCG012841.1,CCG000944.1,CCG013876.1,CCG010776.1,CCG020055.1,CCG023129.1,CCG026212.1,CCG021342.1,CCG000346.1,CCG028184.1,CCG002156.2,CCG028418.1,CCG011238.1,CCG004212.1,CCG017043.1,CCG020010.1,CCG016851.1,CCG024004.1,CCG001877.1,CCG013865.1,CCG011652.1,CCG001461.1,CCG004101.1,CCG022627.1,CCG004402.1,CCG002520.1,CCG000805.1,CCG008769.1,CCG001163.1,CCG022742.2,CCG013465.1,CCG018688.1,CCG022130.1,CCG026695.1,CCG007263.1,CCG026612.1,CCG007874.3,CCG001704.1,CCG003750.1,CCG005524.1,CCG001350.1,CCG010014.1,CCG024006.1,CCG013575.1,CCG016079.1,CCG020803.1,CCG008725.1,CCG015981.1,CCG004076.1,CCG007902.1,CCG001759.1,CCG007485.1,CCG006133.1,CCG001051.1,CCG021990.1,CCG005594.1,CCG000939.1,CCG019230.1,CCG027000.1,CCG003496.1,CCG008816.1,CCG021444.1,CCG010435.1,CCG004988.1,CCG023684.1,CCG027343.1,CCG014222.1,CCG024425.1,CCG001217.1,CCG006013.1,CCG020686.1,CCG006482.1,CCG018245.1,CCG005070.1,CCG021496.1,CCG014647.1,CCG001012.1,CCG013394.1,CCG011382.1,CCG013932.1,CCG014982.1,CCG028137.1,CCG013139.1,CCG023205.1,CCG009737.1,CCG000839.1,CCG006024.1,CCG007177.1,CCG028027.1,CCG011074.1,CCG003940.1,CCG006884.1,CCG026530.1,CCG009393.1,CCG014945.1,CCG020784.1,CCG004895.1,CCG019843.1,CCG021023.1,CCG024246.1,CCG016852.1,CCG004744.1,CCG009398.1,CCG004268.1,CCG023964.1,CCG016909.1,CCG021879.1,CCG001190.1,CCG024092.1,CCG026903.1,CCG016997.1,CCG009167.1,CCG001598.1,CCG025387.1,CCG023005.1,CCG019436.1,CCG024375.1, |
| GO:0004601 | peroxidase activity                             | 18 of 6765 in the list  | 23 of 12752 in the genome  | 1 | CCG011122.1,CCG021071.1,CCG012274.1,CCG012273.2,CCG017425.1,CCG024878.1,CCG003364.1,CCG004145.1,CCG023940.1,CCG004723.1,CCG009672.1,CCG005913.1,CCG001530.1,CCG027211.1,CCG021072.1,CCG000409.1,CCG022399.1,CCG004168.2                                                                                                                                                                                                                                                                                                                                                                                                                                                                                                                                                                                                                                                                                                                                                                                                                                                                                                                                                                                                                                                                                                                                                                                                                                                                                                                                                                                                                                                                                                  |

|            |                                                         |                        |                           |   |                                                                                                                                                                                                                         |
|------------|---------------------------------------------------------|------------------------|---------------------------|---|-------------------------------------------------------------------------------------------------------------------------------------------------------------------------------------------------------------------------|
| GO:0016684 | oxidoreductase activity, acting on peroxide as acceptor | 18 of 6765 in the list | 23 of 12752 in the genome | 1 | CCG011122.1,CCG021071.1,CCG012274.1,CCG012273.2,CCG017425.1,CCG024878.1,CCG003364.1,CCG004145.1,CCG023940.1,CCG004723.1,CCG009672.1,CCG005913.1,CCG001530.1,CCG027211.1,CCG021072.1,CCG000409.1,CCG022399.1,CCG004168.2 |
| GO:0008175 | tRNA methyltransferase activity                         | 7 of 6765 in the list  | 7 of 12752 in the genome  | 1 | CCG016251.1,CCG002462.1,CCG004234.1,CCG002221.1,CCG022183.1,CCG010681.1,CCG023156.1                                                                                                                                     |
| GO:0017150 | tRNA dihydrouridine                                     | 7 of 6765 in the list  | 7 of 12752 in the genome  | 1 | CCG023521.1,CCG010541.1,CCG008916.1,CCG025357.1,CCG020804.1,CCG002449.1,CCG010539.1                                                                                                                                     |

|            |                                  |                         |                            |   |                                                                                                                                                                                                                                                                                                                                                                                                                                                                                                                                                                                                                                                                                                                                                                                                                                                                                                                                                                                                                                                                                                                                                                                                                                                                                                                                                                                                                                                                                                                                                                                                                                                                                                                          |
|------------|----------------------------------|-------------------------|----------------------------|---|--------------------------------------------------------------------------------------------------------------------------------------------------------------------------------------------------------------------------------------------------------------------------------------------------------------------------------------------------------------------------------------------------------------------------------------------------------------------------------------------------------------------------------------------------------------------------------------------------------------------------------------------------------------------------------------------------------------------------------------------------------------------------------------------------------------------------------------------------------------------------------------------------------------------------------------------------------------------------------------------------------------------------------------------------------------------------------------------------------------------------------------------------------------------------------------------------------------------------------------------------------------------------------------------------------------------------------------------------------------------------------------------------------------------------------------------------------------------------------------------------------------------------------------------------------------------------------------------------------------------------------------------------------------------------------------------------------------------------|
| GO:0004713 | protein tyrosine kinase activity | 154 of 6765 in the list | 257 of 12752 in the genome | 1 | CCG000757.1,CCG002799.1,CCG023297.1,CCG025284.1,CCG027737.1,CCG004887.1,CCG005421.1,CCG025148.1,CCG003589.1,CCG002236.1,CCG028602.1,CCG020372.1,CCG007183.1,CCG016952.1,CCG010985.1,CCG026174.1,CCG006244.2,CCG024745.1,CCG009699.2,CCG016689.2,CCG009508.1,CCG019420.2,CCG023381.1,CCG019735.1,CCG015296.1,CCG024301.1,CCG018341.1,CCG008919.1,CCG008381.1,CCG021616.1,CCG022599.1,CCG023108.1,CCG017672.1,CCG017984.1,CCG004698.1,CCG004569.1,CCG024139.1,CCG004782.1,CCG008040.1,CCG024840.1,CCG021507.1,CCG002226.1,CCG011562.1,CCG009002.1,CCG013345.1,CCG011949.1,CCG006465.1,CCG018139.1,CCG011322.1,CCG018494.1,CCG017765.1,CCG008098.1,CCG025614.1,CCG001311.1,CCG023251.1,CCG011482.1,CCG020473.1,CCG025250.1,CCG012974.1,CCG024960.1,CCG028197.1,CCG013826.1,CCG007457.1,CCG023331.1,CCG010096.1,CCG020326.1,CCG028497.1,CCG018960.1,CCG025715.1,CCG009687.2,CCG017127.1,CCG010943.1,CCG002957.1,CCG013403.1,CCG020636.1,CCG000440.1,CCG015186.1,CCG023458.1,CCG027943.1,CCG018477.1,CCG017113.1,CCG011886.1,CCG016095.1,CCG003520.1,CCG006928.1,CCG016738.2,CCG025433.1,CCG020978.1,CCG008404.1,CCG003498.1,CCG022628.1,CCG021179.1,CCG001108.1,CCG005360.1,CCG004123.1,CCG004691.1,CCG025707.1,CCG020837.1,CCG001300.1,CCG010631.1,CCG024922.1,CCG016878.1,CCG010807.5,CCG008307.1,CCG028075.1,CCG024790.1,CCG000641.1,CCG007011.1,CCG020520.1,CCG009177.1,CCG017749.1,CCG023636.1,CCG024595.1,CCG018181.1,CCG021138.1,CCG008367.1,CCG010209.1,CCG002095.1,CCG022929.1,CCG010872.1,CCG002916.1,CCG022154.1,CCG015862.1,CCG017299.1,CCG016017.1,CCG010025.1,CCG017481.1,CCG007419.1,CCG021143.1,CCG008372.1,CCG017519.1,CCG013395.1,CCG017400.1,CCG006173.1,CCG018830.1,CCG028230.1,CCG005789.1,CCG020412.1, |
|------------|----------------------------------|-------------------------|----------------------------|---|--------------------------------------------------------------------------------------------------------------------------------------------------------------------------------------------------------------------------------------------------------------------------------------------------------------------------------------------------------------------------------------------------------------------------------------------------------------------------------------------------------------------------------------------------------------------------------------------------------------------------------------------------------------------------------------------------------------------------------------------------------------------------------------------------------------------------------------------------------------------------------------------------------------------------------------------------------------------------------------------------------------------------------------------------------------------------------------------------------------------------------------------------------------------------------------------------------------------------------------------------------------------------------------------------------------------------------------------------------------------------------------------------------------------------------------------------------------------------------------------------------------------------------------------------------------------------------------------------------------------------------------------------------------------------------------------------------------------------|

|            |                                                                         |                        |                           |   |                                                                                                                                                                                                                                                                                                                                                                                                                                                                                                                                                                         |
|------------|-------------------------------------------------------------------------|------------------------|---------------------------|---|-------------------------------------------------------------------------------------------------------------------------------------------------------------------------------------------------------------------------------------------------------------------------------------------------------------------------------------------------------------------------------------------------------------------------------------------------------------------------------------------------------------------------------------------------------------------------|
| GO:0004812 | aminoacyl-tRNA<br>ligase activity                                       | 46 of 6765 in the list | 69 of 12752 in the genome | 1 | CCG020877.1,CCG021774.1,CCG006231.1,CCG008321.1,CCG023277.1,CCG014396.1,CCG015367.1,CCG024556.1,CCG010191.3,CCG001811.1,CCG009878.1,CCG006188.1,CCG004949.1,CCG027352.3,CCG015950.3,CCG005204.1,CCG016238.1,CCG011135.1,CCG013727.1,CCG028092.1,CCG021716.1,CCG021820.1,CCG002662.1,CCG006570.1,CCG027607.1,CCG000352.1,CCG023315.1,CCG003528.1,CCG010321.1,CCG007654.1,CCG000138.1,CCG017344.1,CCG010565.1,CCG015577.3,CCG003296.1,CCG019545.1,CCG019330.1,CCG001876.1,CCG022269.1,CCG026570.1,CCG008789.1,CCG000414.1,CCG002018.1,CCG024526.1,CCG023510.1,CCG012968.1 |
| GO:0016875 | ligase activity,<br>forming carbon-<br>oxygen bonds                     | 46 of 6765 in the list | 69 of 12752 in the genome | 1 | CCG020877.1,CCG021774.1,CCG006231.1,CCG008321.1,CCG023277.1,CCG014396.1,CCG015367.1,CCG024556.1,CCG010191.3,CCG001811.1,CCG009878.1,CCG006188.1,CCG004949.1,CCG027352.3,CCG015950.3,CCG005204.1,CCG016238.1,CCG011135.1,CCG013727.1,CCG028092.1,CCG021716.1,CCG021820.1,CCG002662.1,CCG006570.1,CCG027607.1,CCG000352.1,CCG023315.1,CCG003528.1,CCG010321.1,CCG007654.1,CCG000138.1,CCG017344.1,CCG010565.1,CCG015577.3,CCG003296.1,CCG019545.1,CCG019330.1,CCG001876.1,CCG022269.1,CCG026570.1,CCG008789.1,CCG000414.1,CCG002018.1,CCG024526.1,CCG023510.1,CCG012968.1 |
| GO:0016876 | ligase activity,<br>forming aminoacyl-<br>tRNA and related<br>compounds | 46 of 6765 in the list | 69 of 12752 in the genome | 1 | CCG020877.1,CCG021774.1,CCG006231.1,CCG008321.1,CCG023277.1,CCG014396.1,CCG015367.1,CCG024556.1,CCG010191.3,CCG001811.1,CCG009878.1,CCG006188.1,CCG004949.1,CCG027352.3,CCG015950.3,CCG005204.1,CCG016238.1,CCG011135.1,CCG013727.1,CCG028092.1,CCG021716.1,CCG021820.1,CCG002662.1,CCG006570.1,CCG027607.1,CCG000352.1,CCG023315.1,CCG003528.1,CCG010321.1,CCG007654.1,CCG000138.1,CCG017344.1,CCG010565.1,CCG015577.3,CCG003296.1,CCG019545.1,CCG019330.1,CCG001876.1,CCG022269.1,CCG026570.1,CCG008789.1,CCG000414.1,CCG002018.1,CCG024526.1,CCG023510.1,CCG012968.1 |
| GO:0003690 | double-stranded<br>DNA binding                                          | 9 of 6765 in the list  | 10 of 12752 in the genome | 1 | CCG006220.1,CCG013625.1,CCG003863.1,CCG003518.3,CCG017906.1,CCG020156.1,CCG022628.1,CCG005284.1,CCG012315.1                                                                                                                                                                                                                                                                                                                                                                                                                                                             |
| GO:0009982 | pseudouridine<br>synthase activity                                      | 9 of 6765 in the list  | 10 of 12752 in the genome | 1 | CCG014946.1,CCG019292.1,CCG020589.1,CCG011971.1,CCG019389.1,CCG002792.1,CCG028653.1,CCG018019.1,CCG016557.1                                                                                                                                                                                                                                                                                                                                                                                                                                                             |

|            |                                                           |                        |                           |   |                                                                                                                                                                                                                                                                                                                                     |
|------------|-----------------------------------------------------------|------------------------|---------------------------|---|-------------------------------------------------------------------------------------------------------------------------------------------------------------------------------------------------------------------------------------------------------------------------------------------------------------------------------------|
| GO:0030983 | mismatched DNA binding                                    | 9 of 6765 in the list  | 10 of 12752 in the genome | 1 | CCG006220.1,CCG013625.1,CCG003863.1,CCG003518.3,CCG017906.1,CCG020156.1,CCG022628.1,CCG005284.1,CCG012315.1                                                                                                                                                                                                                         |
| GO:0004177 | aminopeptidase activity                                   | 17 of 6765 in the list | 22 of 12752 in the genome | 1 | CCG007995.1,CCG006908.1,CCG025503.1,CCG021734.1,CCG003027.1,CCG004986.1,CCG004579.1,CCG008882.1,CCG008920.1,CCG020231.1,CCG013219.1,CCG028508.1,CCG014380.1,CCG006265.1,CCG006118.1,CCG009900.1,CCG010332.1                                                                                                                         |
| GO:0008757 | S-adenosylmethionine-dependent methyltransferase activity | 27 of 6765 in the list | 38 of 12752 in the genome | 1 | CCG016251.1,CCG022589.1,CCG022183.1,CCG002236.1,CCG004234.1,CCG015398.1,CCG001108.1,CCG005097.1,CCG013914.1,CCG019953.1,CCG005108.1,CCG017377.1,CCG012083.1,CCG002462.1,CCG001369.2,CCG016274.1,CCG002140.1,CCG002221.1,CCG018190.1,CCG023156.1,CCG024298.1,CCG005153.1,CCG025991.2,CCG005355.1,CCG028009.1,CCG013859.1,CCG010681.1 |
| GO:0004500 | dopamine beta-monooxygenase activity                      | 11 of 6765 in the list | 13 of 12752 in the genome | 1 | CCG015680.1,CCG018029.3,CCG018054.1,CCG005286.1,CCG025827.1,CCG018923.1,CCG024433.1,CCG018055.1,CCG015679.1,CCG024665.1,CCG011327.1                                                                                                                                                                                                 |
| GO:0008138 | protein tyrosine/serine/threonine phosphatase activity    | 13 of 6765 in the list | 16 of 12752 in the genome | 1 | CCG021369.1,CCG024246.1,CCG007177.1,CCG012754.1,CCG000926.1,CCG014945.1,CCG026300.1,CCG022627.1,CCG013128.1,CCG010776.1,CCG008194.1,CCG012377.1,CCG016460.1                                                                                                                                                                         |
| GO:0004735 | pyrroline-5-carboxylate reductase activity                | 6 of 6765 in the list  | 6 of 12752 in the genome  | 1 | CCG016220.1,CCG015921.1,CCG001423.1,CCG017894.1,CCG003871.1,CCG008860.1                                                                                                                                                                                                                                                             |
| GO:0004814 | arginine-tRNA ligase activity                             | 6 of 6765 in the list  | 6 of 12752 in the genome  | 1 | CCG020877.1,CCG015577.3,CCG012968.1,CCG023510.1,CCG027352.3,CCG028092.1                                                                                                                                                                                                                                                             |
| GO:0005351 | sugar:hydrogen symporter activity                         | 6 of 6765 in the list  | 6 of 12752 in the genome  | 1 | CCG000210.1,CCG023190.1,CCG025309.1,CCG012350.1,CCG009082.1,CCG016673.1                                                                                                                                                                                                                                                             |
| GO:0005402 | cation:sugar symporter activity                           | 6 of 6765 in the list  | 6 of 12752 in the genome  | 1 | CCG000210.1,CCG023190.1,CCG025309.1,CCG012350.1,CCG009082.1,CCG016673.1                                                                                                                                                                                                                                                             |
| GO:0015144 | carbohydrate transmembrane transporter activity           | 6 of 6765 in the list  | 6 of 12752 in the genome  | 1 | CCG000210.1,CCG023190.1,CCG025309.1,CCG012350.1,CCG009082.1,CCG016673.1                                                                                                                                                                                                                                                             |
| GO:0015295 | solute:hydrogen symporter activity                        | 6 of 6765 in the list  | 6 of 12752 in the genome  | 1 | CCG000210.1,CCG023190.1,CCG025309.1,CCG012350.1,CCG009082.1,CCG016673.1                                                                                                                                                                                                                                                             |

|            |                                          |                        |                           |   |                                                                                                                                                                                                                                                                                                                                                                                                                                                                                                                                                                                     |
|------------|------------------------------------------|------------------------|---------------------------|---|-------------------------------------------------------------------------------------------------------------------------------------------------------------------------------------------------------------------------------------------------------------------------------------------------------------------------------------------------------------------------------------------------------------------------------------------------------------------------------------------------------------------------------------------------------------------------------------|
| GO:0051119 | sugar transmembrane transporter activity | 6 of 6765 in the list  | 6 of 12752 in the genome  | 1 | CCG000210.1,CCG023190.1,CCG025309.1,CCG012350.1,CCG009082.1,CCG016673.1                                                                                                                                                                                                                                                                                                                                                                                                                                                                                                             |
| GO:1901476 | carbohydrate transporter activity        | 6 of 6765 in the list  | 6 of 12752 in the genome  | 1 | CCG000210.1,CCG023190.1,CCG025309.1,CCG012350.1,CCG009082.1,CCG016673.1                                                                                                                                                                                                                                                                                                                                                                                                                                                                                                             |
| GO:0003774 | motor activity                           | 47 of 6765 in the list | 72 of 12752 in the genome | 1 | CCG014305.1,CCG023488.2,CCG024769.1,CCG017480.1,CCG012733.1,CCG003707.1,CCG010695.1,CCG004786.1,CCG024834.3,CCG004459.2,CCG023319.1,CCG000603.1,CCG021818.1,CCG001770.1,CCG010622.1,CCG004084.1,CCG001167.1,CCG025520.1,CCG002831.1,CCG001881.1,CCG010657.1,CCG025751.1,CCG005696.1,CCG008801.1,CCG016119.1,CCG012081.1,CCG015426.1,CCG024300.1,CCG000825.1,CCG021228.1,CCG005525.1,CCG019329.1,CCG003024.1,CCG010459.3,CCG023696.1,CCG010363.1,CCG006361.2,CCG021317.1,CCG021911.1,CCG008377.1,CCG017837.1,CCG026558.1,CCG021895.1,CCG011764.1,CCG008346.1,CCG016660.1,CCG018918.1 |
| GO:0004221 | ubiquitin thiolesterase activity         | 29 of 6765 in the list | 42 of 12752 in the genome | 1 | CCG001704.1,CCG027000.1,CCG007080.1,CCG013093.1,CCG003809.1,CCG001350.1,CCG010600.1,CCG011238.1,CCG027283.1,CCG003858.1,CCG026999.1,CCG007937.2,CCG005441.1,CCG010879.1,CCG001877.1,CCG023684.1,CCG012628.1,CCG022742.2,CCG002974.1,CCG028137.1,CCG008969.2,CCG022635.1,CCG014222.1,CCG013876.1,CCG001217.1,CCG009737.1,CCG002938.1,CCG019                                                                                                                                                                                                                                          |
| GO:0036459 | ubiquitinyl hydrolase activity           | 29 of 6765 in the list | 42 of 12752 in the genome | 1 | CCG001704.1,CCG027000.1,CCG007080.1,CCG013093.1,CCG003809.1,CCG001350.1,CCG010600.1,CCG011238.1,CCG027283.1,CCG003858.1,CCG026999.1,CCG007937.2,CCG005441.1,CCG010879.1,CCG001877.1,CCG023684.1,CCG012628.1,CCG022742.2,CCG002974.1,CCG028137.1,CCG008969.2,CCG022635.1,CCG014222.1,CCG013876.1,CCG001217.1,CCG009737.1,CCG002938.1,CCG019                                                                                                                                                                                                                                          |
| GO:0004129 | cytochrome-c oxidase activity            | 16 of 6765 in the list | 21 of 12752 in the genome | 1 | CCG011932.1,CCG013032.1,CCG027229.1,CCG007862.1,CCG024407.1,CCG003501.1,CCG010159.1,CCG022464.1,CCG006450.1,CCG017614.1,CCG023751.1,CCG016304.1,CCG017826.1,CCG025914.2,CCG004605.1,CCG011381.1                                                                                                                                                                                                                                                                                                                                                                                     |
| GO:0015002 | heme-copper terminal oxidase activity    | 16 of 6765 in the list | 21 of 12752 in the genome | 1 | CCG011932.1,CCG013032.1,CCG027229.1,CCG007862.1,CCG024407.1,CCG003501.1,CCG010159.1,CCG022464.1,CCG006450.1,CCG017614.1,CCG023751.1,CCG016304.1,CCG017826.1,CCG025914.2,CCG004605.1,CCG011381.1                                                                                                                                                                                                                                                                                                                                                                                     |

|            |                                                                               |                        |                           |   |                                                                                                                                                                                                                                                                                                                                                                                                             |
|------------|-------------------------------------------------------------------------------|------------------------|---------------------------|---|-------------------------------------------------------------------------------------------------------------------------------------------------------------------------------------------------------------------------------------------------------------------------------------------------------------------------------------------------------------------------------------------------------------|
| GO:0016675 | oxidoreductase activity, acting on a heme group of donors                     | 16 of 6765 in the list | 21 of 12752 in the genome | 1 | CCG011932.1,CCG013032.1,CCG027229.1,CCG007862.1,CCG024407.1,CCG003501.1,CCG010159.1,CCG022464.1,CCG006450.1,CCG017614.1,CCG023751.1,CCG016304.1,CCG017826.1,CCG025914.2,CCG004605.1,CCG011381.1                                                                                                                                                                                                             |
| GO:0016676 | oxidoreductase activity, acting on a heme group of donors, oxygen as acceptor | 16 of 6765 in the list | 21 of 12752 in the genome | 1 | CCG011932.1,CCG013032.1,CCG027229.1,CCG007862.1,CCG024407.1,CCG003501.1,CCG010159.1,CCG022464.1,CCG006450.1,CCG017614.1,CCG023751.1,CCG016304.1,CCG017826.1,CCG025914.2,CCG004605.1,CCG011381.1                                                                                                                                                                                                             |
| GO:0019207 | kinase regulator activity                                                     | 16 of 6765 in the list | 21 of 12752 in the genome | 1 | CCG022393.1,CCG008308.1,CCG006063.1,CCG002324.1,CCG004222.1,CCG014461.1,CCG010489.1,CCG027316.1,CCG024695.1,CCG027505.1,CCG027928.1,CCG010238.1,CCG019558.1,CCG001249.1,CCG025057.1,CCG021794.1                                                                                                                                                                                                             |
| GO:0004047 | aminomethyltransferase activity                                               | 8 of 6765 in the list  | 9 of 12752 in the genome  | 1 | CCG019834.1,CCG010111.1,CCG025108.1,CCG001082.1,CCG003063.1,CCG020154.1,CCG008510.1,CCG008388.1                                                                                                                                                                                                                                                                                                             |
| GO:0016790 | thiolester hydrolase activity                                                 | 33 of 6765 in the list | 49 of 12752 in the genome | 1 | CCG001704.1,CCG007080.1,CCG001350.1,CCG010600.1,CCG013394.1,CCG011238.1,CCG007937.2,CCG010879.1,CCG001877.1,CCG012628.1,CCG028137.1,CCG008969.2,CCG022635.1,CCG009167.1,CCG009737.1,CCG002938.1,CCG012828.1,CCG025233.1,CCG013093.1,CCG027000.1,CCG003809.1,CCG011527.1,CCG027283.1,CCG003858.1,CCG026999.1,CCG005441.1,CCG023684.1,CCG002974.1,CCG022742.2,CCG013876.1,CCG014222.1,CCG001217.1,CCG001217.1 |
| GO:0016209 | antioxidant activity                                                          | 30 of 6765 in the list | 44 of 12752 in the genome | 1 | CCG011122.1,CCG010884.1,CCG021071.1,CCG012274.1,CCG012209.1,CCG011248.1,CCG012273.2,CCG017425.1,CCG024878.1,CCG026431.1,CCG003364.1,CCG004145.1,CCG009904.1,CCG023940.1,CCG009650.1,CCG013816.1,CCG007420.1,CCG004723.1,CCG005913.1,CCG009672.1,CCG027211.1,CCG001530.1,CCG021072.1,CCG009674.1,CCG000409.1,CCG022399.1,CCG019138.2,CCG012                                                                  |
| GO:0016866 | intramolecular transferase activity                                           | 17 of 6765 in the list | 23 of 12752 in the genome | 1 | CCG014946.1,CCG019389.1,CCG010373.1,CCG017797.1,CCG002792.1,CCG007023.1,CCG007771.1,CCG001501.1,CCG006203.1,CCG028305.1,CCG019292.1,CCG017330.1,CCG011971.1,CCG020589.1,CCG018019.1,CCG028653.1,CCG016557.1                                                                                                                                                                                                 |
| GO:0008276 | protein methyltransferase activity                                            | 15 of 6765 in the list | 20 of 12752 in the genome | 1 | CCG005108.1,CCG012083.1,CCG017377.1,CCG001369.2,CCG002140.1,CCG026248.1,CCG005153.1,CCG024298.1,CCG021449.1,CCG025991.2,CCG005355.1,CCG028009.1,CCG013859.1,CCG015398                                                                                                                                                                                                                                       |

|            |                                                                                 |                        |                           |   |                                                                                                                                                                                                                                                                                                                                                                                                 |
|------------|---------------------------------------------------------------------------------|------------------------|---------------------------|---|-------------------------------------------------------------------------------------------------------------------------------------------------------------------------------------------------------------------------------------------------------------------------------------------------------------------------------------------------------------------------------------------------|
| GO:0000175 | 3'-5'-<br>exoribonuclease                                                       | 5 of 6765 in the list  | 5 of 12752 in the genome  | 1 | CCG018917.1,CCG005524.1,CCG004448.2,CCG026612.1,CCG007690.1                                                                                                                                                                                                                                                                                                                                     |
| GO:0004532 | exoribonuclease<br>activity                                                     | 5 of 6765 in the list  | 5 of 12752 in the genome  | 1 | CCG018917.1,CCG005524.1,CCG004448.2,CCG026612.1,CCG007690.1                                                                                                                                                                                                                                                                                                                                     |
| GO:0004861 | cyclin-dependent<br>protein<br>serine/threonine<br>kinase inhibitor<br>activity | 5 of 6765 in the list  | 5 of 12752 in the genome  | 1 | CCG010489.1,CCG008308.1,CCG006063.1,CCG025057.1,CCG014461.1                                                                                                                                                                                                                                                                                                                                     |
| GO:0005227 | calcium activated<br>cation channel<br>activity                                 | 5 of 6765 in the list  | 5 of 12752 in the genome  | 1 | CCG000991.1,CCG019190.1,CCG019191.1,CCG001964.1,CCG014000.1                                                                                                                                                                                                                                                                                                                                     |
| GO:0015269 | calcium-activated<br>potassium channel<br>activity                              | 5 of 6765 in the list  | 5 of 12752 in the genome  | 1 | CCG000991.1,CCG019190.1,CCG019191.1,CCG001964.1,CCG014000.1                                                                                                                                                                                                                                                                                                                                     |
| GO:0016896 | exoribonuclease<br>activity, producing<br>5'-                                   | 5 of 6765 in the list  | 5 of 12752 in the genome  | 1 | CCG018917.1,CCG005524.1,CCG004448.2,CCG026612.1,CCG007690.1                                                                                                                                                                                                                                                                                                                                     |
| GO:0035091 | phosphatidylinositol<br>binding                                                 | 19 of 6765 in the list | 27 of 12752 in the genome | 1 | CCG011437.1,CCG009701.1,CCG013825.1,CCG010882.2,CCG015793.1,CCG016407.1,CCG009226.1,CCG006804.1,CCG023358.1,CCG011141.1,CCG011658.1,CCG007676.1,CCG027955.1,CCG007732.3,CCG012959.1,CCG000515.1,CCG017498.1,CCG006692.2,CCG0                                                                                                                                                                    |
| GO:0019887 | protein kinase<br>regulator activity                                            | 14 of 6765 in the list | 19 of 12752 in the genome | 1 | CCG010238.1,CCG022393.1,CCG008308.1,CCG006063.1,CCG002324.1,CCG004222.1,CCG014461.1,CCG010489.1,CCG024695.1,CCG027505.1,CCG001249.1,CCG027928.1,CCG025057.1,CCG021794                                                                                                                                                                                                                           |
| GO:0003777 | microtubule motor<br>activity                                                   | 32 of 6765 in the list | 49 of 12752 in the genome | 1 | CCG016119.1,CCG008801.1,CCG014305.1,CCG023488.2,CCG017480.1,CCG012733.1,CCG024300.1,CCG000825.1,CCG005525.1,CCG021228.1,CCG003707.1,CCG010695.1,CCG019329.1,CCG003024.1,CCG010363.1,CCG006361.2,CCG021317.1,CCG023319.1,CCG021818.1,CCG001770.1,CCG010622.1,CCG008377.1,CCG001167.1,CCG017837.1,CCG021895.1,CCG025520.1,CCG001881.1,CCG010657.1,CCG025751.1,CCG008346.1,CCG005696.1,CCG018918.1 |

|            |                                                                     |                        |                           |   |                                                                                                                                                                                                                                                                                                                                                                                                                                                                                                                                                                                                                                                                                                                                                                                                                                                                                                                                                                                                                                                                                                                                                                                                                                                                                                                                                                                                                                                                                                                                                                                                                                                                                                                                                                                                                                                                                                                                                                                                                                                                                                                                                                                                                                                                                                                                                                                                                                                                                                                                                                                                                                                                                                                                                                                                                                                                                                                                                                                                                                                                                                                                                                                                                                                                                                                                                                 |
|------------|---------------------------------------------------------------------|------------------------|---------------------------|---|-----------------------------------------------------------------------------------------------------------------------------------------------------------------------------------------------------------------------------------------------------------------------------------------------------------------------------------------------------------------------------------------------------------------------------------------------------------------------------------------------------------------------------------------------------------------------------------------------------------------------------------------------------------------------------------------------------------------------------------------------------------------------------------------------------------------------------------------------------------------------------------------------------------------------------------------------------------------------------------------------------------------------------------------------------------------------------------------------------------------------------------------------------------------------------------------------------------------------------------------------------------------------------------------------------------------------------------------------------------------------------------------------------------------------------------------------------------------------------------------------------------------------------------------------------------------------------------------------------------------------------------------------------------------------------------------------------------------------------------------------------------------------------------------------------------------------------------------------------------------------------------------------------------------------------------------------------------------------------------------------------------------------------------------------------------------------------------------------------------------------------------------------------------------------------------------------------------------------------------------------------------------------------------------------------------------------------------------------------------------------------------------------------------------------------------------------------------------------------------------------------------------------------------------------------------------------------------------------------------------------------------------------------------------------------------------------------------------------------------------------------------------------------------------------------------------------------------------------------------------------------------------------------------------------------------------------------------------------------------------------------------------------------------------------------------------------------------------------------------------------------------------------------------------------------------------------------------------------------------------------------------------------------------------------------------------------------------------------------------------|
| GO:0008235 | metalloexopeptidase activity                                        | 39 of 6765 in the list | 61 of 12752 in the genome | 1 | CCG003407.1,CCG006908.1,CCG025777.1,CCG005125.1,CCG003027.1,CCG012666.1,CCG014935.1,CCG028016.1,CCG004986.1,CCG020794.1,CCG020231.1,CCG014035.1,CCG008715.1,CCG009900.1,CCG006118.1,CCG016072.1,CCG017549.1,CCG014571.1,CCG007995.1,CCG016075.1,CCG023196.1,CCG007467.1,CCG002386.1,CCG021734.1,CCG002383.1,CCG005323.1,CCG016073.1,CCG011860.1,CCG004579.1,CCG008882.1,CCG023502.1,CCG019741.1,CCG003408.1,CCG013219.1,CCG022701.1,CCG014380.1,CCG006265.1,CCG018718.1,CCG018888.1                                                                                                                                                                                                                                                                                                                                                                                                                                                                                                                                                                                                                                                                                                                                                                                                                                                                                                                                                                                                                                                                                                                                                                                                                                                                                                                                                                                                                                                                                                                                                                                                                                                                                                                                                                                                                                                                                                                                                                                                                                                                                                                                                                                                                                                                                                                                                                                                                                                                                                                                                                                                                                                                                                                                                                                                                                                                             |
| GO:0001076 | RNA polymerase II transcription factor binding transcription factor | 20 of 6765 in the list | 29 of 12752 in the genome | 1 | CCG004762.2,CCG026219.1,CCG017156.1,CCG024666.1,CCG020695.1,CCG007647.1,CCG025828.1,CCG017524.1,CCG021633.1,CCG016772.1,CCG011094.1,CCG025856.1,CCG014682.1,CCG019814.1,CCG010318.1,CCG001096.1,CCG028326.3,CCG006134.1,CCG0                                                                                                                                                                                                                                                                                                                                                                                                                                                                                                                                                                                                                                                                                                                                                                                                                                                                                                                                                                                                                                                                                                                                                                                                                                                                                                                                                                                                                                                                                                                                                                                                                                                                                                                                                                                                                                                                                                                                                                                                                                                                                                                                                                                                                                                                                                                                                                                                                                                                                                                                                                                                                                                                                                                                                                                                                                                                                                                                                                                                                                                                                                                                    |
| GO:0001104 | RNA polymerase II transcription cofactor activity                   | 20 of 6765 in the list | 29 of 12752 in the genome | 1 | CCG004762.2,CCG026219.1,CCG017156.1,CCG024666.1,CCG020695.1,CCG007647.1,CCG025828.1,CCG017524.1,CCG021633.1,CCG016772.1,CCG011094.1,CCG025856.1,CCG014682.1,CCG019814.1,CCG010318.1,CCG001096.1,CCG028326.3,CCG006134.1,CCG0                                                                                                                                                                                                                                                                                                                                                                                                                                                                                                                                                                                                                                                                                                                                                                                                                                                                                                                                                                                                                                                                                                                                                                                                                                                                                                                                                                                                                                                                                                                                                                                                                                                                                                                                                                                                                                                                                                                                                                                                                                                                                                                                                                                                                                                                                                                                                                                                                                                                                                                                                                                                                                                                                                                                                                                                                                                                                                                                                                                                                                                                                                                                    |
| GO:0008565 | protein transporter activity                                        | 33 of 6765 in the list | 51 of 12752 in the genome | 1 | CCG026698.1,CCG001673.1,CCG003146.1,CCG011408.1,CCG001172.1,CCG026620.1,CCG019590.1,CCG027692.1,CCG006625.1,CCG003995.1,CCG017612.1,CCG002645.1,CCG022910.1,CCG023595.1,CCG018800.1,CCG024905.1,CCG005262.1,CCG020315.1,CCG006775.1,CCG017077.1,CCG017137.1,CCG008312.1,CCG017078.1,CCG011696.1,CCG027241.1,CCG021377.1,CCG005195.1,CCG020634.1,CCG027257.1,CCG007855.1,CCG010939.1,CCG016541.1,CCG0010710.1,CCG009082.1,CCG023060.1,CCG023980.1,CCG027718.1,CCG000210.1,CCG025309.1,CCG016128.1,CCG028141.1,CCG016245.1,CCG027758.1,CCG026707.1,CCG024383.1,CCG022789.1,CCG017552.1,CCG016326.1,CCG013708.1,CCG010222.1,CCG012096.1,CCG024382.1,CCG005140.1,CCG024034.1,CCG026799.1,CCG010711.1,CCG023190.1,CCG012350.1,CCG026151.1,CCG016959.1,CCG009022.2,CCG017641.1,CCG016654.1,CCG013420.1,CCG0010710.1,CCG009082.1,CCG023060.1,CCG023980.1,CCG027718.1,CCG000210.1,CCG025309.1,CCG016128.1,CCG028141.1,CCG016245.1,CCG027758.1,CCG026707.1,CCG024383.1,CCG022789.1,CCG017552.1,CCG016326.1,CCG013708.1,CCG010222.1,CCG012096.1,CCG024382.1,CCG005140.1,CCG024034.1,CCG026799.1,CCG010711.1,CCG023190.1,CCG012350.1,CCG026151.1,CCG016959.1,CCG009022.2,CCG017641.1,CCG016654.1,CCG013420.1,CCG0010710.1,CCG009082.1,CCG023060.1,CCG023980.1,CCG027718.1,CCG000210.1,CCG025309.1,CCG016128.1,CCG028141.1,CCG016245.1,CCG027758.1,CCG026707.1,CCG024383.1,CCG022789.1,CCG017552.1,CCG016326.1,CCG013708.1,CCG010222.1,CCG012096.1,CCG024382.1,CCG005140.1,CCG024034.1,CCG026799.1,CCG010711.1,CCG023190.1,CCG012350.1,CCG026151.1,CCG016959.1,CCG009022.2,CCG017641.1,CCG016654.1,CCG013420.1,CCG0010710.1,CCG009082.1,CCG023060.1,CCG023980.1,CCG027718.1,CCG000210.1,CCG025309.1,CCG016128.1,CCG028141.1,CCG016245.1,CCG027758.1,CCG026707.1,CCG024383.1,CCG022789.1,CCG017552.1,CCG016326.1,CCG013708.1,CCG010222.1,CCG012096.1,CCG024382.1,CCG005140.1,CCG024034.1,CCG026799.1,CCG010711.1,CCG023190.1,CCG012350.1,CCG026151.1,CCG016959.1,CCG009022.2,CCG017641.1,CCG016654.1,CCG013420.1,CCG0010710.1,CCG009082.1,CCG023060.1,CCG023980.1,CCG027718.1,CCG000210.1,CCG025309.1,CCG016128.1,CCG028141.1,CCG016245.1,CCG027758.1,CCG026707.1,CCG024383.1,CCG022789.1,CCG017552.1,CCG016326.1,CCG013708.1,CCG010222.1,CCG012096.1,CCG024382.1,CCG005140.1,CCG024034.1,CCG026799.1,CCG010711.1,CCG023190.1,CCG012350.1,CCG026151.1,CCG016959.1,CCG009022.2,CCG017641.1,CCG016654.1,CCG013420.1,CCG0010710.1,CCG009082.1,CCG023060.1,CCG023980.1,CCG027718.1,CCG000210.1,CCG025309.1,CCG016128.1,CCG028141.1,CCG016245.1,CCG027758.1,CCG026707.1,CCG024383.1,CCG022789.1,CCG017552.1,CCG016326.1,CCG013708.1,CCG010222.1,CCG012096.1,CCG024382.1,CCG005140.1,CCG024034.1,CCG026799.1,CCG010711.1,CCG023190.1,CCG012350.1,CCG026151.1,CCG016959.1,CCG009022.2,CCG017641.1,CCG016654.1,CCG013420.1,CCG0010710.1,CCG009082.1,CCG023060.1,CCG023980.1,CCG027718.1,CCG000210.1,CCG025309.1,CCG016128.1,CCG028141.1,CCG016245.1,CCG027758.1,CCG026707.1,CCG024383.1,CCG022789.1,CCG017552.1,CCG016326.1,CCG013708.1,CCG010222.1,CCG012096.1,CCG024382.1,CCG005140.1,CCG024034.1,CCG026799.1,CCG010711.1,CCG023190.1,CCG012350.1,CCG026151.1,CCG016959.1,CCG009022.2,CCG017641.1,CCG016654.1,CCG013420.1,CCG0010710.1,CCG009082.1,CCG023060.1,CCG023980.1,CCG027718.1,CCG000210.1,CCG025309.1,CCG016128.1,CCG028141.1,CCG016245.1,CCG027758.1,CCG026707.1,CCG0243 |

|            |                                                    |                        |                           |   |                                                                                                                                                                                                                                                                                                                                                                                                                                                                                                                                                                       |
|------------|----------------------------------------------------|------------------------|---------------------------|---|-----------------------------------------------------------------------------------------------------------------------------------------------------------------------------------------------------------------------------------------------------------------------------------------------------------------------------------------------------------------------------------------------------------------------------------------------------------------------------------------------------------------------------------------------------------------------|
| GO:0015294 | solute:cation symporter activity                   | 34 of 6765 in the list | 53 of 12752 in the genome | 1 | CCG010710.1,CCG009082.1,CCG023060.1,CCG023980.1,CCG027718.1,CCG000210.1,CCG025309.1,CCG016128.1,CCG028141.1,CCG016245.1,CCG027758.1,CCG026707.1,CCG024383.1,CCG022789.1,CCG017552.1,CCG016326.1,CCG013708.1,CCG010222.1,CCG012096.1,CCG024382.1,CCG005140.1,CCG024034.1,CCG026799.1,CCG010711.1,CCG023190.1,CCG012350.1,CCG026151.1,CCG016959.1,CCG009022.2,CCG017641.1,CCG016654.1,CCG013420.1,CCG019953.1,CCG016251.1,CCG016274.1,CCG002462.1,CCG024611.1,CCG002221.1,CCG022183.1,CCG018902.1,CCG023156.1,CCG004234.1,CCG015546.1,CCG007777.1,CCG005097.1,CCG010681 |
| GO:0008173 | RNA methyltransferase activity                     | 15 of 6765 in the list | 21 of 12752 in the genome | 1 | CCG019953.1,CCG016251.1,CCG016274.1,CCG002462.1,CCG024611.1,CCG002221.1,CCG022183.1,CCG018902.1,CCG023156.1,CCG004234.1,CCG015546.1,CCG007777.1,CCG005097.1,CCG010681                                                                                                                                                                                                                                                                                                                                                                                                 |
| GO:0016763 | transferase activity, transferring pentosyl groups | 15 of 6765 in the list | 21 of 12752 in the genome | 1 | CCG017559.1,CCG028311.1,CCG010986.1,CCG004188.3,CCG016415.1,CCG017331.1,CCG009165.1,CCG027125.1,CCG004440.1,CCG001602.1,CCG003677.1,CCG026045.1,CCG025840.1,CCG010460                                                                                                                                                                                                                                                                                                                                                                                                 |
| GO:0019900 | kinase binding                                     | 15 of 6765 in the list | 21 of 12752 in the genome | 1 | CCG009521.1,CCG013849.1,CCG028049.1,CCG017923.1,CCG009035.1,CCG004682.1,CCG001854.1,CCG013274.1,CCG020898.1,CCG012743.1,CCG013794.1,CCG004783.1,CCG011648.1,CCG026404                                                                                                                                                                                                                                                                                                                                                                                                 |
| GO:0019901 | protein kinase binding                             | 15 of 6765 in the list | 21 of 12752 in the genome | 1 | CCG009521.1,CCG013849.1,CCG028049.1,CCG017923.1,CCG009035.1,CCG004682.1,CCG001854.1,CCG013274.1,CCG020898.1,CCG012743.1,CCG013794.1,CCG004783.1,CCG011648.1,CCG026404                                                                                                                                                                                                                                                                                                                                                                                                 |
| GO:0005088 | Ras guanyl-nucleotide exchange factor activity     | 24 of 6765 in the list | 36 of 12752 in the genome | 1 | CCG006050.2,CCG026214.1,CCG023484.1,CCG009980.1,CCG010808.1,CCG009512.1,CCG008035.1,CCG022334.1,CCG008892.2,CCG000596.1,CCG019585.1,CCG012670.1,CCG010849.1,CCG025667.2,CCG003602.1,CCG004884.2,CCG009510.1,CCG018380.1,CCG018015.1,CCG010329.2,CCG021294.1,CCG001579.1,CCG011422.1,                                                                                                                                                                                                                                                                                  |
| GO:0005089 | Rho guanyl-nucleotide exchange factor activity     | 24 of 6765 in the list | 36 of 12752 in the genome | 1 | CCG006050.2,CCG026214.1,CCG023484.1,CCG009980.1,CCG010808.1,CCG009512.1,CCG008035.1,CCG022334.1,CCG008892.2,CCG000596.1,CCG019585.1,CCG012670.1,CCG010849.1,CCG025667.2,CCG003602.1,CCG004884.2,CCG009510.1,CCG018380.1,CCG018015.1,CCG010329.2,CCG021294.1,CCG001579.1,CCG011422.1,                                                                                                                                                                                                                                                                                  |
| GO:0003682 | chromatin binding                                  | 4 of 6765 in the list  | 4 of 12752 in the genome  | 1 | CCG000587.1,CCG027348.1,CCG000575.1,CCG000122.1                                                                                                                                                                                                                                                                                                                                                                                                                                                                                                                       |
| GO:0003896 | DNA primase                                        | 4 of 6765 in the list  | 4 of 12752 in the genome  | 1 | CCG015694.1,CCG009896.1,CCG006164.1,CCG016381.1                                                                                                                                                                                                                                                                                                                                                                                                                                                                                                                       |
| GO:0003909 | DNA ligase activity                                | 4 of 6765 in the list  | 4 of 12752 in the genome  | 1 | CCG020439.2,CCG023474.1,CCG021045.1,CCG006919.1                                                                                                                                                                                                                                                                                                                                                                                                                                                                                                                       |
| GO:0003910 | DNA ligase (ATP) activity                          | 4 of 6765 in the list  | 4 of 12752 in the genome  | 1 | CCG020439.2,CCG023474.1,CCG021045.1,CCG006919.1                                                                                                                                                                                                                                                                                                                                                                                                                                                                                                                       |

|            |                                                                               |                       |                           |   |                                                                                                 |
|------------|-------------------------------------------------------------------------------|-----------------------|---------------------------|---|-------------------------------------------------------------------------------------------------|
| GO:0004066 | asparagine synthase (glutamine-                                               | 4 of 6765 in the list | 4 of 12752 in the genome  | 1 | CCG006821.1,CCG010174.2,CCG009333.1,CCG024133.1                                                 |
| GO:0004649 | poly(ADP-ribose) glycohydrolase activity                                      | 4 of 6765 in the list | 4 of 12752 in the genome  | 1 | CCG007200.2,CCG009334.1,CCG015677.1,CCG006822.1                                                 |
| GO:0004816 | asparagine-tRNA ligase activity                                               | 4 of 6765 in the list | 4 of 12752 in the genome  | 1 | CCG021774.1,CCG015367.1,CCG010565.1,CCG010321.1                                                 |
| GO:0008521 | acetyl-CoA transporter activity                                               | 4 of 6765 in the list | 4 of 12752 in the genome  | 1 | CCG024983.3,CCG010871.1,CCG025198.1,CCG009721.2                                                 |
| GO:0016832 | aldehyde-lyase activity                                                       | 4 of 6765 in the list | 4 of 12752 in the genome  | 1 | CCG022035.1,CCG001445.1,CCG001440.1,CCG013339.1                                                 |
| GO:0016886 | ligase activity, forming phosphoric ester bonds                               | 4 of 6765 in the list | 4 of 12752 in the genome  | 1 | CCG020439.2,CCG023474.1,CCG021045.1,CCG006919.1                                                 |
| GO:0017056 | structural constituent of                                                     | 4 of 6765 in the list | 4 of 12752 in the genome  | 1 | CCG008116.1,CCG020053.1,CCG003009.1,CCG023186.1                                                 |
| GO:0017069 | snRNA binding                                                                 | 4 of 6765 in the list | 4 of 12752 in the genome  | 1 | CCG010489.1,CCG000183.1,CCG003938.1,CCG014461.1                                                 |
| GO:0030515 | snoRNA binding                                                                | 4 of 6765 in the list | 4 of 12752 in the genome  | 1 | CCG002792.1,CCG000540.1,CCG028653.1,CCG016652.1                                                 |
| GO:0051184 | cofactor transporter activity                                                 | 4 of 6765 in the list | 4 of 12752 in the genome  | 1 | CCG024983.3,CCG010871.1,CCG025198.1,CCG009721.2                                                 |
| GO:0051185 | coenzyme transporter activity                                                 | 4 of 6765 in the list | 4 of 12752 in the genome  | 1 | CCG024983.3,CCG010871.1,CCG025198.1,CCG009721.2                                                 |
| GO:0004835 | tubulin-tyrosine ligase activity                                              | 8 of 6765 in the list | 10 of 12752 in the genome | 1 | CCG007600.1,CCG027008.1,CCG019482.1,CCG013913.1,CCG012077.1,CCG011071.1,CCG023429.1,CCG015864.1 |
| GO:0008121 | ubiquinol-cytochrome-c reductase activity                                     | 8 of 6765 in the list | 10 of 12752 in the genome | 1 | CCG020879.1,CCG016495.1,CCG001649.1,CCG006864.1,CCG026839.1,CCG004908.1,CCG024297.1,CCG018319.2 |
| GO:0016679 | oxidoreductase activity, acting on diphenols and related substances as donors | 8 of 6765 in the list | 10 of 12752 in the genome | 1 | CCG020879.1,CCG016495.1,CCG001649.1,CCG006864.1,CCG026839.1,CCG004908.1,CCG024297.1,CCG018319.2 |

|            |                                                                                              |                        |                           |   |                                                                                                                                                                                                                                                                                                                                                                                                                                                 |
|------------|----------------------------------------------------------------------------------------------|------------------------|---------------------------|---|-------------------------------------------------------------------------------------------------------------------------------------------------------------------------------------------------------------------------------------------------------------------------------------------------------------------------------------------------------------------------------------------------------------------------------------------------|
| GO:0016681 | oxidoreductase activity, acting on diphenols and related substances as donors, cytochrome as | 8 of 6765 in the list  | 10 of 12752 in the genome | 1 | CCG020879.1,CCG016495.1,CCG001649.1,CCG006864.1,CCG026839.1,CCG004908.1,CCG024297.1,CCG018319.2                                                                                                                                                                                                                                                                                                                                                 |
| GO:0005083 | small GTPase regulator activity                                                              | 36 of 6765 in the list | 57 of 12752 in the genome | 1 | CCG016454.1,CCG021442.1,CCG022083.1,CCG025433.1,CCG014617.1,CCG012519.1,CCG004132.1,CCG017369.1,CCG024806.1,CCG016831.1,CCG014513.1,CCG024000.1,CCG016965.1,CCG022676.1,CCG027878.1,CCG024809.1,CCG009024.1,CCG015333.1,CCG002971.1,CCG002109.1,CCG021151.1,CCG005105.1,CCG022394.1,CCG011341.1,CCG016027.1,CCG019462.1,CCG018861.1,CCG016323.1,CCG025554.1,CCG013303.1,CCG007631.1,CCG013203.1,CCG016181.1,CCG018776.1,CCG010260.1,CCG002864.1 |
| GO:0008170 | N-methyltransferase activity                                                                 | 16 of 6765 in the list | 23 of 12752 in the genome | 1 | CCG015398.1,CCG005097.1,CCG005108.1,CCG019953.1,CCG017377.1,CCG012083.1,CCG001369.2,CCG016274.1,CCG002140.1,CCG002221.1,CCG024298.1,CCG005153.1,CCG025991.2,CCG005355.1,CCG028009.1,CCG013859.1                                                                                                                                                                                                                                                 |
| GO:0003697 | single-stranded DNA binding                                                                  | 6 of 6765 in the list  | 7 of 12752 in the genome  | 1 | CCG004402.1,CCG017444.1,CCG027067.1,CCG004332.1,CCG009962.1,CCG005395.1                                                                                                                                                                                                                                                                                                                                                                         |
| GO:0004860 | protein kinase inhibitor activity                                                            | 6 of 6765 in the list  | 7 of 12752 in the genome  | 1 | CCG010489.1,CCG008308.1,CCG006063.1,CCG025057.1,CCG021794.1,CCG014461.1                                                                                                                                                                                                                                                                                                                                                                         |
| GO:0008641 | small protein activating enzyme activity                                                     | 6 of 6765 in the list  | 7 of 12752 in the genome  | 1 | CCG007331.2,CCG008301.1,CCG025892.1,CCG028333.1,CCG013109.1,CCG007809.1                                                                                                                                                                                                                                                                                                                                                                         |
| GO:0016796 | exonuclease activity, active with either ribo- or deoxyribonucleic acids and producing 5'-   | 6 of 6765 in the list  | 7 of 12752 in the genome  | 1 | CCG018917.1,CCG005524.1,CCG004448.2,CCG017961.1,CCG026612.1,CCG007690.1                                                                                                                                                                                                                                                                                                                                                                         |

|            |                                                                                         |                        |                           |   |                                                                                                                                                                                                                                                                                      |
|------------|-----------------------------------------------------------------------------------------|------------------------|---------------------------|---|--------------------------------------------------------------------------------------------------------------------------------------------------------------------------------------------------------------------------------------------------------------------------------------|
| GO:0016861 | intramolecular oxidoreductase activity, interconverting aldoses and                     | 6 of 6765 in the list  | 7 of 12752 in the genome  | 1 | CCG019405.1,CCG025948.4,CCG003748.1,CCG000431.1,CCG018076.1,CCG020504.1                                                                                                                                                                                                              |
| GO:0019210 | kinase inhibitor activity                                                               | 6 of 6765 in the list  | 7 of 12752 in the genome  | 1 | CCG010489.1,CCG008308.1,CCG006063.1,CCG025057.1,CCG021794.1,CCG014461.1                                                                                                                                                                                                              |
| GO:0030291 | protein serine/threonine kinase inhibitor activity                                      | 6 of 6765 in the list  | 7 of 12752 in the genome  | 1 | CCG010489.1,CCG008308.1,CCG006063.1,CCG025057.1,CCG021794.1,CCG014461.1                                                                                                                                                                                                              |
| GO:0031418 | L-ascorbic acid binding                                                                 | 11 of 6765 in the list | 15 of 12752 in the genome | 1 | CCG009496.1,CCG023114.1,CCG025320.1,CCG026331.1,CCG009139.1,CCG019431.1,CCG015802.1,CCG020559.1,CCG008895.1,CCG002783.1,CCG021947.1                                                                                                                                                  |
| GO:0048029 | monosaccharide binding                                                                  | 11 of 6765 in the list | 15 of 12752 in the genome | 1 | CCG009496.1,CCG023114.1,CCG025320.1,CCG026331.1,CCG009139.1,CCG019431.1,CCG015802.1,CCG020559.1,CCG008895.1,CCG002783.1,CCG021947.1                                                                                                                                                  |
| GO:0016701 | oxidoreductase activity, acting on single donors with incorporation of molecular oxygen | 14 of 6765 in the list | 20 of 12752 in the genome | 1 | CCG006994.1,CCG011789.1,CCG000895.1,CCG023114.1,CCG006358.1,CCG011721.1,CCG019431.1,CCG011722.1,CCG005177.1,CCG018907.1,CCG025465.1,CCG001266.1,CCG002783.1,CCG006059.1                                                                                                              |
| GO:0030145 | manganese ion binding                                                                   | 14 of 6765 in the list | 20 of 12752 in the genome | 1 | CCG005594.1,CCG007995.1,CCG004986.1,CCG004579.1,CCG021734.1,CCG020231.1,CCG025161.1,CCG028508.1,CCG005481.1,CCG014380.1,CCG003027.1,CCG011382.1,CCG009900.1,CCG006118                                                                                                                |
| GO:0000988 | protein binding transcription factor activity                                           | 24 of 6765 in the list | 37 of 12752 in the genome | 1 | CCG004762.2,CCG005161.1,CCG026219.1,CCG017156.1,CCG024666.1,CCG020695.1,CCG007647.1,CCG025828.1,CCG017524.1,CCG021633.1,CCG011094.1,CCG016772.1,CCG025856.1,CCG012847.1,CCG014682.1,CCG023199.2,CCG019814.1,CCG001096.1,CCG010318.1,CCG025398.1,CCG028326.3,CCG005168.1,CCG006134.1, |
| GO:0000989 | transcription factor binding transcription factor activity                              | 24 of 6765 in the list | 37 of 12752 in the genome | 1 | CCG004762.2,CCG005161.1,CCG026219.1,CCG017156.1,CCG024666.1,CCG020695.1,CCG007647.1,CCG025828.1,CCG017524.1,CCG021633.1,CCG011094.1,CCG016772.1,CCG025856.1,CCG012847.1,CCG014682.1,CCG023199.2,CCG019814.1,CCG001096.1,CCG010318.1,CCG025398.1,CCG028326.3,CCG005168.1,CCG006134.1, |

|            |                                                                                       |                        |                           |   |                                                                                                                                                                                                                                                                                                                                     |
|------------|---------------------------------------------------------------------------------------|------------------------|---------------------------|---|-------------------------------------------------------------------------------------------------------------------------------------------------------------------------------------------------------------------------------------------------------------------------------------------------------------------------------------|
| GO:0003712 | transcription cofactor activity                                                       | 24 of 6765 in the list | 37 of 12752 in the genome | 1 | CCG004762.2,CCG005161.1,CCG026219.1,CCG017156.1,CCG024666.1,CCG020695.1,CCG007647.1,CCG025828.1,CCG017524.1,CCG021633.1,CCG011094.1,CCG016772.1,CCG025856.1,CCG012847.1,CCG014682.1,CCG023199.2,CCG019814.1,CCG001096.1,CCG010318.1,CCG025398.1,CCG028326.3,CCG005168.1,CCG006134.1,                                                |
| GO:0004722 | protein serine/threonine phosphatase                                                  | 9 of 6765 in the list  | 12 of 12752 in the genome | 1 | CCG006884.1,CCG003362.1,CCG028615.1,CCG018688.1,CCG004212.1,CCG007485.1,CCG011382.1,CCG027539.1,CCG026212.1                                                                                                                                                                                                                         |
| GO:0015296 | anion:cation symporter activity                                                       | 9 of 6765 in the list  | 12 of 12752 in the genome | 1 | CCG024382.1,CCG027758.1,CCG024383.1,CCG026707.1,CCG016654.1,CCG016326.1,CCG013708.1,CCG016959.1,CCG010222.1                                                                                                                                                                                                                         |
| GO:0016799 | hydrolase activity, hydrolyzing N-glycosyl                                            | 9 of 6765 in the list  | 12 of 12752 in the genome | 1 | CCG024792.1,CCG003216.1,CCG003765.1,CCG016445.1,CCG005486.1,CCG015062.1,CCG005487.1,CCG005485.1,CCG023431.1                                                                                                                                                                                                                         |
| GO:0004576 | oligosaccharyl transferase activity                                                   | 7 of 6765 in the list  | 9 of 12752 in the genome  | 1 | CCG013985.1,CCG017381.1,CCG018536.1,CCG009928.1,CCG025472.1,CCG023617.1,CCG004091.1                                                                                                                                                                                                                                                 |
| GO:0016860 | intramolecular oxidoreductase activity                                                | 7 of 6765 in the list  | 9 of 12752 in the genome  | 1 | CCG019405.1,CCG025948.4,CCG003748.1,CCG001102.1,CCG000431.1,CCG018076.1,CCG020504.1                                                                                                                                                                                                                                                 |
| GO:0019899 | enzyme binding                                                                        | 27 of 6765 in the list | 43 of 12752 in the genome | 1 | CCG018647.1,CCG013849.1,CCG001101.1,CCG019394.1,CCG028049.1,CCG017923.1,CCG013274.1,CCG003049.1,CCG019571.1,CCG012743.1,CCG019599.1,CCG004783.1,CCG000469.1,CCG009521.1,CCG010270.1,CCG009035.1,CCG004682.1,CCG001854.1,CCG020723.1,CCG020898.1,CCG013794.1,CCG011648.1,CCG026404.1,CCG004134.1,CCG018646.1,CCG018184.1,CCG006273.1 |
| GO:0016646 | oxidoreductase activity, acting on the CH-NH group of donors, NAD or NADP as acceptor | 10 of 6765 in the list | 14 of 12752 in the genome | 1 | CCG028131.1,CCG017894.1,CCG015943.1,CCG016220.1,CCG011491.1,CCG015921.1,CCG001423.1,CCG027551.3,CCG003871.1,CCG008860.1                                                                                                                                                                                                             |
| GO:0005342 | organic acid transmembrane transporter activity                                       | 20 of 6765 in the list | 31 of 12752 in the genome | 1 | CCG024382.1,CCG004637.1,CCG006348.1,CCG016959.1,CCG026667.1,CCG024222.1,CCG027758.1,CCG005768.1,CCG026707.1,CCG024383.1,CCG016654.1,CCG005769.1,CCG018073.1,CCG020840.1,CCG019407.1,CCG008734.1,CCG013708.1,CCG010965.1,CCG0                                                                                                        |

|            |                                                                                                             |                        |                           |   |                                                                                                                                                                                                                              |
|------------|-------------------------------------------------------------------------------------------------------------|------------------------|---------------------------|---|------------------------------------------------------------------------------------------------------------------------------------------------------------------------------------------------------------------------------|
| GO:0008514 | organic anion transmembrane transporter activity                                                            | 20 of 6765 in the list | 31 of 12752 in the genome | 1 | CCG024382.1,CCG004637.1,CCG006348.1,CCG016959.1,CCG026667.1,CCG024222.1,CCG027758.1,CCG005768.1,CCG026707.1,CCG024383.1,CCG016654.1,CCG005769.1,CCG018073.1,CCG020840.1,CCG019407.1,CCG008734.1,CCG013708.1,CCG010965.1,CCG0 |
| GO:0046943 | carboxylic acid transmembrane transporter activity                                                          | 20 of 6765 in the list | 31 of 12752 in the genome | 1 | CCG024382.1,CCG004637.1,CCG006348.1,CCG016959.1,CCG026667.1,CCG024222.1,CCG027758.1,CCG005768.1,CCG026707.1,CCG024383.1,CCG016654.1,CCG005769.1,CCG018073.1,CCG020840.1,CCG019407.1,CCG008734.1,CCG013708.1,CCG010965.1,CCG0 |
| GO:0004402 | histone acetyltransferase activity                                                                          | 5 of 6765 in the list  | 6 of 12752 in the genome  | 1 | CCG028032.1,CCG008547.1,CCG005515.1,CCG018482.1,CCG023199.2                                                                                                                                                                  |
| GO:0004549 | tRNA-specific ribonuclease                                                                                  | 5 of 6765 in the list  | 6 of 12752 in the genome  | 1 | CCG000583.2,CCG004228.1,CCG009393.1,CCG000939.1,CCG023129.1                                                                                                                                                                  |
| GO:0004806 | triglyceride lipase activity                                                                                | 5 of 6765 in the list  | 6 of 12752 in the genome  | 1 | CCG010367.1,CCG017255.1,CCG016997.1,CCG017257.1,CCG021640.1                                                                                                                                                                  |
| GO:0016894 | endonuclease activity, active with either ribo- or deoxyribonucleic acids and producing 3'-phosphomonoester | 5 of 6765 in the list  | 6 of 12752 in the genome  | 1 | CCG000583.2,CCG009393.1,CCG000939.1,CCG000979.1,CCG007263.1                                                                                                                                                                  |
| GO:0003707 | steroid hormone receptor activity                                                                           | 17 of 6765 in the list | 26 of 12752 in the genome | 1 | CCG024271.1,CCG008742.1,CCG016745.1,CCG008741.1,CCG017795.1,CCG000659.1,CCG014509.1,CCG027127.1,CCG019520.1,CCG019185.1,CCG022281.1,CCG020586.1,CCG012009.1,CCG010702.1,CCG020224.1,CCG004878.1,CCG014928.1                  |
| GO:0016835 | carbon-oxygen lyase activity                                                                                | 17 of 6765 in the list | 26 of 12752 in the genome | 1 | CCG023355.1,CCG026511.1,CCG008959.2,CCG007610.1,CCG021086.2,CCG023780.2,CCG018453.1,CCG006998.1,CCG024792.1,CCG023350.1,CCG003173.1,CCG023354.1,CCG022453.1,CCG012249.1,CCG025277.1,CCG008960.1,CCG022027.1                  |
| GO:0001948 | glycoprotein                                                                                                | 3 of 6765 in the list  | 3 of 12752 in the genome  | 1 | CCG026583.1,CCG006702.1,CCG025670.1                                                                                                                                                                                          |
| GO:0003904 | deoxyribodipyrimidine photo-lyase                                                                           | 3 of 6765 in the list  | 3 of 12752 in the genome  | 1 | CCG018745.1,CCG018744.1,CCG019574.1                                                                                                                                                                                          |
| GO:0004411 | homogentisate 1,2-dioxygenase                                                                               | 3 of 6765 in the list  | 3 of 12752 in the genome  | 1 | CCG011789.1,CCG011721.1,CCG011722.1                                                                                                                                                                                          |

|            |                                                               |                       |                          |   |                                     |
|------------|---------------------------------------------------------------|-----------------------|--------------------------|---|-------------------------------------|
| GO:0004654 | polyribonucleotide nucleotidyltransferase activity            | 3 of 6765 in the list | 3 of 12752 in the genome | 1 | CCG018917.1,CCG005524.1,CCG026612.1 |
| GO:0004830 | tryptophan-tRNA ligase activity                               | 3 of 6765 in the list | 3 of 12752 in the genome | 1 | CCG008321.1,CCG017344.1,CCG026570.1 |
| GO:0005201 | extracellular matrix structural                               | 3 of 6765 in the list | 3 of 12752 in the genome | 1 | CCG020089.1,CCG004326.1,CCG004982.1 |
| GO:0008108 | UDP-glucose:hexose-1-phosphate uridylyltransferase activity   | 3 of 6765 in the list | 3 of 12752 in the genome | 1 | CCG007046.2,CCG007045.1,CCG001038.1 |
| GO:0008172 | S-methyltransferase                                           | 3 of 6765 in the list | 3 of 12752 in the genome | 1 | CCG002236.1,CCG018190.1,CCG001108.1 |
| GO:0008553 | hydrogen-exporting ATPase activity, phosphorylative mechanism | 3 of 6765 in the list | 3 of 12752 in the genome | 1 | CCG007724.1,CCG021934.1,CCG019619.1 |
| GO:0008898 | homocysteine S-methyltransferase activity                     | 3 of 6765 in the list | 3 of 12752 in the genome | 1 | CCG002236.1,CCG018190.1,CCG001108.1 |
| GO:0016423 | tRNA (guanine) methyltransferase activity                     | 3 of 6765 in the list | 3 of 12752 in the genome | 1 | CCG016251.1,CCG002221.1,CCG022183.1 |
| GO:0017172 | cysteine dioxygenase                                          | 3 of 6765 in the list | 3 of 12752 in the genome | 1 | CCG006994.1,CCG025465.1,CCG018907.1 |
| GO:0043022 | ribosome binding                                              | 3 of 6765 in the list | 3 of 12752 in the genome | 1 | CCG026155.1,CCG023663.1,CCG007518.1 |
| GO:0043394 | proteoglycan                                                  | 3 of 6765 in the list | 3 of 12752 in the genome | 1 | CCG026583.1,CCG006702.1,CCG025670.1 |
| GO:0043395 | heparan sulfate proteoglycan                                  | 3 of 6765 in the list | 3 of 12752 in the genome | 1 | CCG026583.1,CCG006702.1,CCG025670.1 |
| GO:0050290 | sphingomyelin phosphodiesterase D activity                    | 3 of 6765 in the list | 3 of 12752 in the genome | 1 | CCG010255.1,CCG028418.1,CCG010257.1 |

|            |                                                                |                         |                            |   |                                                                                                                                                                                                                                                                                                                                                                                                                                                                                                                                                                                                                                                                                                                                                                                                                                                                                                                                                                                                                                                                                                                                                                                                                                                                                                                                                                                                                                                                                                                                                                                                           |
|------------|----------------------------------------------------------------|-------------------------|----------------------------|---|-----------------------------------------------------------------------------------------------------------------------------------------------------------------------------------------------------------------------------------------------------------------------------------------------------------------------------------------------------------------------------------------------------------------------------------------------------------------------------------------------------------------------------------------------------------------------------------------------------------------------------------------------------------------------------------------------------------------------------------------------------------------------------------------------------------------------------------------------------------------------------------------------------------------------------------------------------------------------------------------------------------------------------------------------------------------------------------------------------------------------------------------------------------------------------------------------------------------------------------------------------------------------------------------------------------------------------------------------------------------------------------------------------------------------------------------------------------------------------------------------------------------------------------------------------------------------------------------------------------|
| GO:0060072 | large conductance calcium-activated potassium channel activity | 3 of 6765 in the list   | 3 of 12752 in the genome   | 1 | CCG019190.1,CCG019191.1,CCG014000.1                                                                                                                                                                                                                                                                                                                                                                                                                                                                                                                                                                                                                                                                                                                                                                                                                                                                                                                                                                                                                                                                                                                                                                                                                                                                                                                                                                                                                                                                                                                                                                       |
| GO:0070569 | uridylyltransferase activity                                   | 3 of 6765 in the list   | 3 of 12752 in the genome   | 1 | CCG007046.2,CCG007045.1,CCG001038.1                                                                                                                                                                                                                                                                                                                                                                                                                                                                                                                                                                                                                                                                                                                                                                                                                                                                                                                                                                                                                                                                                                                                                                                                                                                                                                                                                                                                                                                                                                                                                                       |
| GO:0016874 | ligase activity                                                | 134 of 6765 in the list | 237 of 12752 in the genome | 1 | CCG010174.2,CCG023277.1,CCG014396.1,CCG024556.1,CCG027737.1,CCG010191.3,CCG009151.1,CCG009878.1,CCG015950.3,CCG025493.1,CCG016238.1,CCG006505.1,CCG017097.1,CCG026590.1,CCG027607.1,CCG015294.1,CCG023474.1,CCG020230.3,CCG012077.1,CCG001635.1,CCG013913.1,CCG011310.1,CCG008808.1,CCG000414.1,CCG024872.1,CCG020877.1,CCG006231.1,CCG008321.1,CCG021197.1,CCG015315.1,CCG013109.1,CCG011071.1,CCG011192.2,CCG020873.1,CCG017967.1,CCG016189.1,CCG027008.1,CCG005204.1,CCG020757.1,CCG004333.1,CCG006919.1,CCG002368.1,CCG006821.1,CCG023315.1,CCG004263.1,CCG006341.1,CCG007654.1,CCG023677.2,CCG023452.1,CCG028181.1,CCG020203.1,CCG019545.1,CCG003532.1,CCG022773.2,CCG019330.1,CCG014219.1,CCG001876.1,CCG003852.1,CCG008557.1,CCG026570.1,CCG006791.1,CCG009982.1,CCG003060.1,CCG011220.1,CCG017522.1,CCG021774.1,CCG021045.1,CCG015367.1,CCG014351.1,CCG011491.1,CCG009333.1,CCG006188.1,CCG022370.1,CCG027352.3,CCG011135.1,CCG013727.1,CCG020078.1,CCG028092.1,CCG002515.1,CCG020441.1,CCG019139.1,CCG019482.1,CCG010561.1,CCG011837.1,CCG010321.1,CCG007600.1,CCG000138.1,CCG017344.1,CCG027495.1,CCG007254.1,CCG015577.3,CCG023429.1,CCG025731.1,CCG026099.1,CCG014322.1,CCG024133.1,CCG018268.1,CCG004257.1,CCG017330.1,CCG013505.1,CCG025897.1,CCG027270.1,CCG011474.1,CCG002018.1,CCG021760.1,CCG010187.2,CCG001811.1,CCG012408.1,CCG004949.1,CCG004388.1,CCG001925.1,CCG021716.1,CCG021820.1,CCG006570.1,CCG002662.1,CCG019549.1,CCG007809.1,CCG015864.1,CCG000352.1,CCG000682.1,CCG002897.1,CCG003528.1,CCG020439.2,CCG010565.1,CCG018659.2,CCG003296.1,CCG022269.1,CCG028305.1,CCG015943 |

|            |                                                                                    |                        |                           |   |                                                                                                                                     |
|------------|------------------------------------------------------------------------------------|------------------------|---------------------------|---|-------------------------------------------------------------------------------------------------------------------------------------|
| GO:0000036 | ACP phosphopantetheine attachment site binding involved in fatty acid biosynthetic | 11 of 6765 in the list | 16 of 12752 in the genome | 1 | CCG000944.1,CCG024450.1,CCG004015.1,CCG019239.1,CCG013059.1,CCG001163.1,CCG025836.1,CCG004016.1,CCG013575.1,CCG025833.1,CCG018615.3 |
| GO:0044620 | ACP phosphopantetheine attachment site binding                                     | 11 of 6765 in the list | 16 of 12752 in the genome | 1 | CCG000944.1,CCG024450.1,CCG004015.1,CCG019239.1,CCG013059.1,CCG001163.1,CCG025836.1,CCG004016.1,CCG013575.1,CCG025833.1,CCG018615.3 |
| GO:0051192 | prosthetic group binding                                                           | 11 of 6765 in the list | 16 of 12752 in the genome | 1 | CCG000944.1,CCG024450.1,CCG004015.1,CCG019239.1,CCG013059.1,CCG001163.1,CCG025836.1,CCG004016.1,CCG013575.1,CCG025833.1,CCG018615.3 |
| GO:0005343 | organic acid:sodium                                                                | 8 of 6765 in the list  | 11 of 12752 in the genome | 1 | CCG024382.1,CCG027758.1,CCG024383.1,CCG026707.1,CCG016654.1,CCG013708.1,CCG016959.1,CCG010222.1                                     |
| GO:0030597 | RNA glycosylase activity                                                           | 8 of 6765 in the list  | 11 of 12752 in the genome | 1 | CCG005486.1,CCG015062.1,CCG005487.1,CCG003216.1,CCG005485.1,CCG003765.1,CCG023431.1,CCG016445.1                                     |
| GO:0030598 | rRNA N-glycosylase activity                                                        | 8 of 6765 in the list  | 11 of 12752 in the genome | 1 | CCG005486.1,CCG015062.1,CCG005487.1,CCG003216.1,CCG005485.1,CCG003765.1,CCG023431.1,CCG016445.1                                     |
| GO:0051539 | 4 iron, 4 sulfur cluster binding                                                   | 8 of 6765 in the list  | 11 of 12752 in the genome | 1 | CCG024432.2,CCG015780.1,CCG012249.1,CCG023350.1,CCG027545.1,CCG024750.2,CCG027340.1,CCG010522.1                                     |

|            |                                                              |                        |                            |   |                                                                                                                                                                                                                                                                                                                                                                                                                                                                                                                                                                                                                                                                                                                                                                                                                                                                                                                    |
|------------|--------------------------------------------------------------|------------------------|----------------------------|---|--------------------------------------------------------------------------------------------------------------------------------------------------------------------------------------------------------------------------------------------------------------------------------------------------------------------------------------------------------------------------------------------------------------------------------------------------------------------------------------------------------------------------------------------------------------------------------------------------------------------------------------------------------------------------------------------------------------------------------------------------------------------------------------------------------------------------------------------------------------------------------------------------------------------|
| GO:0005543 | phospholipid binding                                         | 75 of 6765 in the list | 130 of 12752 in the genome | 1 | CCG009701.1,CCG009512.1,CCG005040.1,CCG027955.1,CCG007732.3,CCG010849.1,CCG003602.1,CCG018015.1,CCG021483.1,CCG017266.1,CCG019462.1,CCG016878.1,CCG008035.1,CCG010807.5,CCG015793.1,CCG006804.1,CCG011172.1,CCG023358.1,CCG011141.1,CCG011658.1,CCG019585.1,CCG005988.1,CCG013869.1,CCG010270.1,CCG012959.1,CCG022420.1,CCG009510.1,CCG010260.1,CCG025903.1,CCG011422.1,CCG024595.1,CCG024840.1,CCG006050.2,CCG004132.1,CCG009980.1,CCG014647.1,CCG025470.1,CCG008892.2,CCG009798.1,CCG007702.1,CCG027355.1,CCG023527.1,CCG022749.1,CCG017498.1,CCG023464.1,CCG006692.2,CCG001579.1,CCG028136.1,CCG011437.1,CCG004169.1,CCG013825.1,CCG022394.1,CCG010882.2,CCG016407.1,CCG009226.1,CCG023336.1,CCG000596.1,CCG007676.1,CCG025554.1,CCG026397.1,CCG027765.1,CCG018888.1,CCG006361.2,CCG006780.1,CCG006463.1,CCG008652.1,CCG018630.1,CCG005366.1,CCG027309.1,CCG000515.1,CCG026971.1,CCG021294.1,CCG003386.1,CCG020 |
| GO:0030246 | carbohydrate binding                                         | 15 of 6765 in the list | 23 of 12752 in the genome  | 1 | CCG009496.1,CCG023114.1,CCG025320.1,CCG026331.1,CCG009139.1,CCG019431.1,CCG021167.1,CCG015802.1,CCG020559.1,CCG008895.1,CCG006213.1,CCG002783.1,CCG021947.1,CCG001011                                                                                                                                                                                                                                                                                                                                                                                                                                                                                                                                                                                                                                                                                                                                              |
| GO:0060589 | nucleoside-triphosphatase regulator activity                 | 46 of 6765 in the list | 78 of 12752 in the genome  | 1 | CCG016454.1,CCG021442.1,CCG000807.1,CCG022083.1,CCG025433.1,CCG014617.1,CCG012519.1,CCG026798.1,CCG004132.1,CCG017369.1,CCG024806.1,CCG026694.1,CCG016831.1,CCG014513.1,CCG024000.1,CCG016965.1,CCG022676.1,CCG027878.1,CCG024809.1,CCG009024.1,CCG015333.1,CCG002338.1,CCG002971.1,CCG002109.1,CCG025178.1,CCG021151.1,CCG005105.1,CCG022394.1,CCG003448.1,CCG011341.1,CCG016027.1,CCG019462.1,CCG018861.1,CCG016323.1,CCG019947.1,CCG021902.1,CCG025554.1,CCG013303.1,CCG007631.1,CCG017753.1,CCG016181.1,CCG013203.1,CCG018776.1,CCG010260.1,CCG002166.1,CCG002864.1                                                                                                                                                                                                                                                                                                                                            |
| GO:0016645 | oxidoreductase activity, acting on the CH-NH group of donors | 12 of 6765 in the list | 18 of 12752 in the genome  | 1 | CCG007203.1,CCG028131.1,CCG017894.1,CCG002231.1,CCG015943.1,CCG016220.1,CCG011491.1,CCG015921.1,CCG001423.1,CCG027551.3,CCG003871.1,CCG008860.1                                                                                                                                                                                                                                                                                                                                                                                                                                                                                                                                                                                                                                                                                                                                                                    |

|            |                                                                                                                                                               |                        |                           |   |                                                                                                                                                                                                                                                                                                                                                                                                                                                                                                                                                 |
|------------|---------------------------------------------------------------------------------------------------------------------------------------------------------------|------------------------|---------------------------|---|-------------------------------------------------------------------------------------------------------------------------------------------------------------------------------------------------------------------------------------------------------------------------------------------------------------------------------------------------------------------------------------------------------------------------------------------------------------------------------------------------------------------------------------------------|
| GO:0016702 | oxidoreductase activity, acting on single donors with incorporation of molecular oxygen, incorporation of two atoms of oxygen                                 | 12 of 6765 in the list | 18 of 12752 in the genome | 1 | CCG006994.1,CCG011789.1,CCG000895.1,CCG023114.1,CCG011721.1,CCG019431.1,CCG011722.1,CCG018907.1,CCG025465.1,CCG001266.1,CCG002783.1,CCG006059.1                                                                                                                                                                                                                                                                                                                                                                                                 |
| GO:1901681 | sulfur compound binding                                                                                                                                       | 9 of 6765 in the list  | 13 of 12752 in the genome | 1 | CCG009771.2,CCG026583.1,CCG027004.1,CCG019560.1,CCG025670.1,CCG001072.1,CCG004244.1,CCG006702.1,CCG020707.1                                                                                                                                                                                                                                                                                                                                                                                                                                     |
| GO:0003913 | DNA photolyase activity                                                                                                                                       | 6 of 6765 in the list  | 8 of 12752 in the genome  | 1 | CCG018745.1,CCG006606.1,CCG012140.1,CCG018744.1,CCG005110.1,CCG019574.1                                                                                                                                                                                                                                                                                                                                                                                                                                                                         |
| GO:0016717 | oxidoreductase activity, acting on paired donors, with oxidation of a pair of donors resulting in the reduction of molecular oxygen to two molecules of water | 6 of 6765 in the list  | 8 of 12752 in the genome  | 1 | CCG023643.1,CCG008690.1,CCG000673.1,CCG001497.1,CCG000402.1,CCG017935.1                                                                                                                                                                                                                                                                                                                                                                                                                                                                         |
| GO:0030695 | GTPase regulator activity                                                                                                                                     | 44 of 6765 in the list | 75 of 12752 in the genome | 1 | CCG016454.1,CCG021442.1,CCG000807.1,CCG022083.1,CCG025433.1,CCG014617.1,CCG012519.1,CCG026798.1,CCG004132.1,CCG017369.1,CCG024806.1,CCG016831.1,CCG014513.1,CCG024000.1,CCG016965.1,CCG022676.1,CCG027878.1,CCG024809.1,CCG009024.1,CCG015333.1,CCG002338.1,CCG002971.1,CCG002109.1,CCG025178.1,CCG021151.1,CCG005105.1,CCG022394.1,CCG011341.1,CCG016027.1,CCG019462.1,CCG018861.1,CCG016323.1,CCG019947.1,CCG021902.1,CCG025554.1,CCG013303.1,CCG007631.1,CCG017753.1,CCG016181.1,CCG013203.1,CCG018776.1,CCG016888.1,CCG000100.1,CCG000881.1 |

|            |                                        |                         |                             |   |                                                                                                                                                                                                                                                                                                                                                                                                                                                                                                                                                                                                                                                                                                                                                                                                                                                                                                                                                                                                                                                                                                                                                                                                                                                                                                                                                                                                                                                                                                                                                                                                                                                                                                                          |
|------------|----------------------------------------|-------------------------|-----------------------------|---|--------------------------------------------------------------------------------------------------------------------------------------------------------------------------------------------------------------------------------------------------------------------------------------------------------------------------------------------------------------------------------------------------------------------------------------------------------------------------------------------------------------------------------------------------------------------------------------------------------------------------------------------------------------------------------------------------------------------------------------------------------------------------------------------------------------------------------------------------------------------------------------------------------------------------------------------------------------------------------------------------------------------------------------------------------------------------------------------------------------------------------------------------------------------------------------------------------------------------------------------------------------------------------------------------------------------------------------------------------------------------------------------------------------------------------------------------------------------------------------------------------------------------------------------------------------------------------------------------------------------------------------------------------------------------------------------------------------------------|
| GO:0016740 | transferase activity                   | 747 of 6765 in the list | 1379 of 12752 in the genome | 1 | CCG005374.1,CCG009860.1,CCG016649.1,CCG000184.1,CCG007885.1,CCG004887.1,CCG005079.1,CCG021738.1,CCG001057.1,CCG016952.1,CCG014419.1,CCG025108.1,CCG026174.1,CCG004468.1,CCG018190.1,CCG003397.1,CCG000411.1,CCG013059.1,CCG002470.1,CCG000980.1,CCG025836.1,CCG025472.1,CCG024680.1,CCG018432.1,CCG028407.1,CCG008245.1,CCG017266.1,CCG028198.1,CCG016689.2,CCG014519.1,CCG021479.1,CCG001219.2,CCG023381.1,CCG019735.1,CCG016094.1,CCG012623.1,CCG013089.1,CCG015047.1,CCG008381.1,CCG021616.1,CCG002047.2,CCG000944.1,CCG004514.1,CCG004050.1,CCG017473.1,CCG021110.1,CCG009882.1,CCG003063.1,CCG017984.1,CCG002930.1,CCG023883.1,CCG027636.1,CCG006745.1,CCG004569.1,CCG024139.1,CCG008040.1,CCG011949.1,CCG006465.1,CCG003248.1,CCG011231.2,CCG015694.1,CCG023172.1,CCG013865.1,CCG018494.1,CCG006484.1,CCG012083.1,CCG001311.1,CCG026602.1,CCG007457.1,CCG023468.1,CCG012332.1,CCG015350.1,CCG019133.1,CCG002957.1,CCG013318.1,CCG003683.2,CCG021948.1,CCG011148.1,CCG004612.1,CCG022214.1,CCG006785.1,CCG000775.1,CCG013889.1,CCG001163.1,CCG000552.1,CCG001365.1,CCG005108.1,CCG021137.1,CCG009375.1,CCG015186.1,CCG017701.1,CCG009518.1,CCG016327.2,CCG006456.1,CCG024200.1,CCG023125.1,CCG016381.1,CCG011727.1,CCG010360.1,CCG023458.1,CCG022788.1,CCG017001.1,CCG027943.1,CCG008388.1,CCG003520.1,CCG004926.1,CCG006928.1,CCG016738.2,CCG000789.1,CCG017381.1,CCG026016.1,CCG003554.1,CCG023678.1,CCG005524.1,CCG024784.1,CCG011547.1,CCG006329.1,CCG008404.1,CCG017947.1,CCG018201.1,CCG005501.1,CCG007766.1,CCG009803.1,CCG008287.1,CCG021179.1,CCG001108.1,CCG000672.1,CCG004224.1,CCG009038.1,CCG025707.1,CCG027202.1,CCG000209.1,CCG027189.2,CCG021056.1,CCG007902.1,CCG024155.1,CCG019263.1,CCG024922.1, |
| GO:0003743 | translation initiation factor activity | 21 of 6765 in the list  | 34 of 12752 in the genome   | 1 | CCG021940.1,CCG021933.1,CCG004807.1,CCG005622.1,CCG021944.1,CCG018168.1,CCG000368.1,CCG018719.1,CCG018164.1,CCG014819.1,CCG001777.1,CCG027281.1,CCG024529.1,CCG006344.1,CCG024907.1,CCG014947.2,CCG021521.1,CCG008592.1,CCG026825.1,CCG007705.1,CCG000294.1                                                                                                                                                                                                                                                                                                                                                                                                                                                                                                                                                                                                                                                                                                                                                                                                                                                                                                                                                                                                                                                                                                                                                                                                                                                                                                                                                                                                                                                              |

|            |                                                                                           |                        |                           |   |                                                                                                                                                                                                                                                                         |
|------------|-------------------------------------------------------------------------------------------|------------------------|---------------------------|---|-------------------------------------------------------------------------------------------------------------------------------------------------------------------------------------------------------------------------------------------------------------------------|
| GO:0005097 | Rab GTPase activator activity                                                             | 22 of 6765 in the list | 36 of 12752 in the genome | 1 | CCG025433.1,CCG016027.1,CCG011341.1,CCG012519.1,CCG017369.1,CCG024000.1,CCG016965.1,CCG022676.1,CCG013303.1,CCG027878.1,CCG024809.1,CCG009024.1,CCG007631.1,CCG015333.1,CCG002971.1,CCG016181.1,CCG013203.1,CCG018776.1,CCG002109.1,CCG021151.1,CCG002864.1,CCG005105.1 |
| GO:0005099 | Ras GTPase activator activity                                                             | 22 of 6765 in the list | 36 of 12752 in the genome | 1 | CCG025433.1,CCG016027.1,CCG011341.1,CCG012519.1,CCG017369.1,CCG024000.1,CCG016965.1,CCG022676.1,CCG013303.1,CCG027878.1,CCG024809.1,CCG009024.1,CCG007631.1,CCG015333.1,CCG002971.1,CCG016181.1,CCG013203.1,CCG018776.1,CCG002109.1,CCG021151.1,CCG002864.1,CCG005105.1 |
| GO:0003916 | DNA topoisomerase                                                                         | 7 of 6765 in the list  | 10 of 12752 in the genome | 1 | CCG022918.1,CCG008972.1,CCG027183.2,CCG016201.1,CCG000166.1,CCG011615.1,CCG003438.1                                                                                                                                                                                     |
| GO:0003950 | NAD+ ADP-ribosyltransferase activity                                                      | 4 of 6765 in the list  | 5 of 12752 in the genome  | 1 | CCG028311.1,CCG001602.1,CCG026045.1,CCG018432.1                                                                                                                                                                                                                         |
| GO:0015018 | galactosylgalactosylxylosylprotein 3-beta-glucuronosyltransfe                             | 4 of 6765 in the list  | 5 of 12752 in the genome  | 1 | CCG007987.1,CCG028549.1,CCG000360.1,CCG001219.2                                                                                                                                                                                                                         |
| GO:0015020 | glucuronosyltransferase activity                                                          | 4 of 6765 in the list  | 5 of 12752 in the genome  | 1 | CCG007987.1,CCG028549.1,CCG000360.1,CCG001219.2                                                                                                                                                                                                                         |
| GO:0016805 | dipeptidase activity                                                                      | 4 of 6765 in the list  | 5 of 12752 in the genome  | 1 | CCG016816.1,CCG020794.1,CCG014571.1,CCG025777.1                                                                                                                                                                                                                         |
| GO:0016813 | hydrolase activity, acting on carbon-nitrogen (but not peptide) bonds, in linear amidines | 4 of 6765 in the list  | 5 of 12752 in the genome  | 1 | CCG020771.1,CCG025340.1,CCG019749.1,CCG023501.1                                                                                                                                                                                                                         |
| GO:0070566 | adenylyltransferase activity                                                              | 4 of 6765 in the list  | 5 of 12752 in the genome  | 1 | CCG027115.1,CCG003165.1,CCG004535.1,CCG013089.1                                                                                                                                                                                                                         |

|            |                                              |                        |                           |   |                                                                                                                                                                                                                                                                                                                                                                                                                                                                                                                                                                                                                                     |
|------------|----------------------------------------------|------------------------|---------------------------|---|-------------------------------------------------------------------------------------------------------------------------------------------------------------------------------------------------------------------------------------------------------------------------------------------------------------------------------------------------------------------------------------------------------------------------------------------------------------------------------------------------------------------------------------------------------------------------------------------------------------------------------------|
| GO:0008238 | exopeptidase activity                        | 51 of 6765 in the list | 89 of 12752 in the genome | 1 | CCG003407.1,CCG006908.1,CCG025777.1,CCG005125.1,CCG021923.1,CCG003027.1,CCG012666.1,CCG014935.1,CCG028016.1,CCG004986.1,CCG020794.1,CCG024082.1,CCG020231.1,CCG014035.1,CCG028508.1,CCG008715.1,CCG009900.1,CCG017549.1,CCG006118.1,CCG016072.1,CCG006071.1,CCG014571.1,CCG007995.1,CCG016075.1,CCG023196.1,CCG025503.1,CCG007467.1,CCG002386.1,CCG021734.1,CCG002383.1,CCG001168.1,CCG013364.1,CCG005323.1,CCG016073.1,CCG003767.1,CCG014031.1,CCG011860.1,CCG004579.1,CCG008882.1,CCG023502.1,CCG016816.1,CCG008920.1,CCG003408.1,CCG019741.1,CCG013219.1,CCG022701.1,CCG006265.1,CCG019742.1,CCG014380.1,CCG010306.1,CCG010222.1 |
| GO:0008060 | ARF GTPase activator activity                | 8 of 6765 in the list  | 12 of 12752 in the genome | 1 | CCG016454.1,CCG021442.1,CCG022083.1,CCG022394.1,CCG019462.1,CCG010260.1,CCG004132.1,CCG025554.1                                                                                                                                                                                                                                                                                                                                                                                                                                                                                                                                     |
| GO:0016776 | phosphotransferase activity, phosphate group | 8 of 6765 in the list  | 12 of 12752 in the genome | 1 | CCG024095.1,CCG017995.1,CCG007417.1,CCG021110.1,CCG012374.1,CCG006529.1,CCG016683.1,CCG014116.1                                                                                                                                                                                                                                                                                                                                                                                                                                                                                                                                     |
| GO:0015370 | solute:sodium symporter activity             | 27 of 6765 in the list | 46 of 12752 in the genome | 1 | CCG005140.1,CCG024382.1,CCG012096.1,CCG010710.1,CCG024034.1,CCG026799.1,CCG023060.1,CCG010711.1,CCG023980.1,CCG027718.1,CCG016128.1,CCG026151.1,CCG028141.1,CCG016245.1,CCG016959.1,CCG009022.2,CCG027758.1,CCG026707.1,CCG017641.1,CCG024383.1,CCG022789.1,CCG016654.1,CCG013420.1,CCG017552.1,CCG013708.1,CCG025323.1,CCG010222.1                                                                                                                                                                                                                                                                                                 |
| GO:0016830 | carbon-carbon lyase activity                 | 27 of 6765 in the list | 46 of 12752 in the genome | 1 | CCG022035.1,CCG004532.1,CCG012843.1,CCG006606.1,CCG009662.1,CCG028524.1,CCG019574.1,CCG008776.1,CCG001440.1,CCG017175.1,CCG028623.1,CCG012308.1,CCG018745.1,CCG012619.1,CCG012840.1,CCG017278.1,CCG013339.1,CCG005110.1,CCG025940.1,CCG001445.1,CCG012140.1,CCG018744.1,CCG015411.1,CCG009764.1,CCG001553.1,CCG005923.1,CCG006896.1                                                                                                                                                                                                                                                                                                 |
| GO:0008509 | anion transmembrane transporter activity     | 33 of 6765 in the list | 57 of 12752 in the genome | 1 | CCG004637.1,CCG006770.1,CCG022510.1,CCG024222.1,CCG027758.1,CCG026707.1,CCG024383.1,CCG005769.1,CCG018073.1,CCG019407.1,CCG016326.1,CCG026240.1,CCG013013.1,CCG013708.1,CCG023191.1,CCG010222.1,CCG017477.1,CCG024382.1,CCG006348.1,CCG012061.1,CCG001279.1,CCG023190.1,CCG025510.1,CCG016959.1,CCG023244.1,CCG020769.1,CCG026667.1,CCG005768.1,CCG016654.1,CCG020840.1,CCG008734.1,CCG010965.1,CCG004637.1                                                                                                                                                                                                                         |

|            |                                                                                   |                        |                           |   |                                                                                                                                                             |
|------------|-----------------------------------------------------------------------------------|------------------------|---------------------------|---|-------------------------------------------------------------------------------------------------------------------------------------------------------------|
| GO:0016884 | carbon-nitrogen ligase activity, with glutamine as amido-N-donor                  | 13 of 6765 in the list | 21 of 12752 in the genome | 1 | CCG006821.1,CCG011220.1,CCG010174.2,CCG017522.1,CCG024133.1,CCG015315.1,CCG004263.1,CCG006791.1,CCG002515.1,CCG009333.1,CCG018659.2,CCG017967.1,CCG009982.1 |
| GO:0003918 | DNA topoisomerase type II (ATP-                                                   | 5 of 6765 in the list  | 7 of 12752 in the genome  | 1 | CCG022918.1,CCG027183.2,CCG000166.1,CCG011615.1,CCG003438.1                                                                                                 |
| GO:0016641 | oxidoreductase activity, acting on the CH-NH2 group of donors, oxygen as acceptor | 5 of 6765 in the list  | 7 of 12752 in the genome  | 1 | CCG018553.1,CCG021340.1,CCG026536.1,CCG016868.1,CCG019315.1                                                                                                 |
| GO:0030151 | molybdenum ion binding                                                            | 5 of 6765 in the list  | 7 of 12752 in the genome  | 1 | CCG025639.1,CCG004547.1,CCG020908.1,CCG013026.1,CCG008237.1                                                                                                 |
| GO:0061505 | DNA topoisomerase II                                                              | 5 of 6765 in the list  | 7 of 12752 in the genome  | 1 | CCG022918.1,CCG027183.2,CCG000166.1,CCG011615.1,CCG003438.1                                                                                                 |
| GO:0000030 | mannosyltransferase activity                                                      | 2 of 6765 in the list  | 2 of 12752 in the genome  | 1 | CCG007766.1,CCG003247.1                                                                                                                                     |
| GO:0003689 | DNA clamp loader activity                                                         | 2 of 6765 in the list  | 2 of 12752 in the genome  | 1 | CCG018583.1,CCG015312.2                                                                                                                                     |
| GO:0003827 | alpha-1,3-mannosylglycoprotein 2-beta-N-acetylglucosaminyltransferase activity    | 2 of 6765 in the list  | 2 of 12752 in the genome  | 1 | CCG016003.1,CCG017197.1                                                                                                                                     |
| GO:0003872 | 6-phosphofructokinase activity                                                    | 2 of 6765 in the list  | 2 of 12752 in the genome  | 1 | CCG022214.1,CCG003215.3                                                                                                                                     |
| GO:0003874 | 6-pyruvoyltetrahydropterin synthase                                               | 2 of 6765 in the list  | 2 of 12752 in the genome  | 1 | CCG021086.2,CCG023780.2                                                                                                                                     |
| GO:0003883 | CTP synthase                                                                      | 2 of 6765 in the list  | 2 of 12752 in the genome  | 1 | CCG025493.1,CCG023452.1                                                                                                                                     |
| GO:0003989 | acetyl-CoA carboxylase activity                                                   | 2 of 6765 in the list  | 2 of 12752 in the genome  | 1 | CCG012408.1,CCG017097.1                                                                                                                                     |

|            |                                            |                       |                          |   |                         |
|------------|--------------------------------------------|-----------------------|--------------------------|---|-------------------------|
| GO:0003994 | aconitate hydratase activity               | 2 of 6765 in the list | 2 of 12752 in the genome | 1 | CCG012249.1,CCG023350.1 |
| GO:0004037 | allantoicase activity                      | 2 of 6765 in the list | 2 of 12752 in the genome | 1 | CCG020771.1,CCG019749.1 |
| GO:0004055 | argininosuccinate synthase activity        | 2 of 6765 in the list | 2 of 12752 in the genome | 1 | CCG025731.1,CCG025897.1 |
| GO:0004070 | aspartate carbamoyltransferase activity    | 2 of 6765 in the list | 2 of 12752 in the genome | 1 | CCG018108.1,CCG005938.1 |
| GO:0004084 | branched-chain-amino-acid transaminase     | 2 of 6765 in the list | 2 of 12752 in the genome | 1 | CCG022407.1,CCG025439.1 |
| GO:0004109 | coproporphyrinogen oxidase activity        | 2 of 6765 in the list | 2 of 12752 in the genome | 1 | CCG026752.1,CCG021335.1 |
| GO:0004139 | deoxyribose-phosphate aldolase activity    | 2 of 6765 in the list | 2 of 12752 in the genome | 1 | CCG001445.1,CCG001440.1 |
| GO:0004163 | diphosphomevalonate decarboxylase activity | 2 of 6765 in the list | 2 of 12752 in the genome | 1 | CCG005923.1,CCG015411.1 |
| GO:0004164 | diphthine synthase activity                | 2 of 6765 in the list | 2 of 12752 in the genome | 1 | CCG022589.1,CCG013914.1 |
| GO:0004170 | dUTP diphosphatase                         | 2 of 6765 in the list | 2 of 12752 in the genome | 1 | CCG010960.2,CCG016222.1 |
| GO:0004329 | formate-tetrahydrofolate ligase activity   | 2 of 6765 in the list | 2 of 12752 in the genome | 1 | CCG011491.1,CCG015943.1 |
| GO:0004332 | fructose-bisphosphate aldolase activity    | 2 of 6765 in the list | 2 of 12752 in the genome | 1 | CCG022035.1,CCG013339.1 |
| GO:0004342 | glucosamine-6-phosphate deaminase activity | 2 of 6765 in the list | 2 of 12752 in the genome | 1 | CCG025948.4,CCG020504.1 |
| GO:0004359 | glutaminase activity                       | 2 of 6765 in the list | 2 of 12752 in the genome | 1 | CCG026030.1,CCG000472.1 |

|            |                                                                  |                       |                          |   |                         |
|------------|------------------------------------------------------------------|-----------------------|--------------------------|---|-------------------------|
| GO:0004379 | glycylpeptide N-tetradecanoyltransferase activity                | 2 of 6765 in the list | 2 of 12752 in the genome | 1 | CCG022255.1,CCG025177.1 |
| GO:0004449 | isocitrate dehydrogenase (NAD+) activity                         | 2 of 6765 in the list | 2 of 12752 in the genome | 1 | CCG024798.1,CCG027631.1 |
| GO:0004526 | ribonuclease P activity                                          | 2 of 6765 in the list | 2 of 12752 in the genome | 1 | CCG004228.1,CCG023129.1 |
| GO:0004531 | deoxyribonuclease II activity                                    | 2 of 6765 in the list | 2 of 12752 in the genome | 1 | CCG000979.1,CCG007263.1 |
| GO:0004535 | poly(A)-specific ribonuclease                                    | 2 of 6765 in the list | 2 of 12752 in the genome | 1 | CCG004448.2,CCG007690.1 |
| GO:0004590 | orotidine-5'-phosphate decarboxylase activity                    | 2 of 6765 in the list | 2 of 12752 in the genome | 1 | CCG017175.1,CCG025940.1 |
| GO:0004609 | phosphatidylserine decarboxylase activity                        | 2 of 6765 in the list | 2 of 12752 in the genome | 1 | CCG004532.1,CCG012308.1 |
| GO:0004639 | phosphoribosylaminoimidazolesuccinocarboxamide synthase activity | 2 of 6765 in the list | 2 of 12752 in the genome | 1 | CCG028305.1,CCG017330.1 |
| GO:0004645 | phosphorylase activity                                           | 2 of 6765 in the list | 2 of 12752 in the genome | 1 | CCG027416.1,CCG007885.1 |
| GO:0004657 | proline dehydrogenase activity                                   | 2 of 6765 in the list | 2 of 12752 in the genome | 1 | CCG007203.1,CCG002231.1 |
| GO:0004677 | DNA-dependent protein kinase                                     | 2 of 6765 in the list | 2 of 12752 in the genome | 1 | CCG004233.1,CCG023155.1 |
| GO:0004743 | pyruvate kinase activity                                         | 2 of 6765 in the list | 2 of 12752 in the genome | 1 | CCG019953.1,CCG017200.1 |
| GO:0004807 | triose-phosphate isomerase activity                              | 2 of 6765 in the list | 2 of 12752 in the genome | 1 | CCG019405.1,CCG018076.1 |

|            |                                                            |                       |                          |   |                         |
|------------|------------------------------------------------------------|-----------------------|--------------------------|---|-------------------------|
| GO:0004810 | tRNA<br>adenylyltransferase<br>activity                    | 2 of 6765 in the list | 2 of 12752 in the genome | 1 | CCG003165.1,CCG013089.1 |
| GO:0004832 | valine-tRNA ligase<br>activity                             | 2 of 6765 in the list | 2 of 12752 in the genome | 1 | CCG006188.1,CCG016238.1 |
| GO:0004864 | protein<br>phosphatase                                     | 2 of 6765 in the list | 2 of 12752 in the genome | 1 | CCG009450.1,CCG017560.1 |
| GO:0004884 | ecdysteroid<br>hormone receptor                            | 2 of 6765 in the list | 2 of 12752 in the genome | 1 | CCG008741.1,CCG008742.1 |
| GO:0005118 | sevenless binding                                          | 2 of 6765 in the list | 2 of 12752 in the genome | 1 | CCG018930.1,CCG004238.1 |
| GO:0005200 | structural<br>constituent of                               | 2 of 6765 in the list | 2 of 12752 in the genome | 1 | CCG014318.1,CCG003587.1 |
| GO:0005218 | intracellular ligand-<br>gated calcium<br>channel activity | 2 of 6765 in the list | 2 of 12752 in the genome | 1 | CCG026796.1,CCG020400.2 |
| GO:0005219 | ryanodine-sensitive<br>calcium-release<br>channel activity | 2 of 6765 in the list | 2 of 12752 in the genome | 1 | CCG026796.1,CCG020400.2 |
| GO:0005415 | nucleoside:sodium<br>symporter activity                    | 2 of 6765 in the list | 2 of 12752 in the genome | 1 | CCG024034.1,CCG013420.1 |
| GO:0005523 | tropomyosin                                                | 2 of 6765 in the list | 2 of 12752 in the genome | 1 | CCG015908.2,CCG028236.1 |
| GO:0005539 | glycosaminoglycan<br>binding                               | 2 of 6765 in the list | 2 of 12752 in the genome | 1 | CCG027004.1,CCG019560.1 |
| GO:0008028 | monocarboxylic<br>acid<br>transmembrane                    | 2 of 6765 in the list | 2 of 12752 in the genome | 1 | CCG016654.1,CCG010222.1 |
| GO:0008176 | tRNA (guanine-N7-<br>)-methyltransferase<br>activity       | 2 of 6765 in the list | 2 of 12752 in the genome | 1 | CCG016251.1,CCG022183.1 |
| GO:0008201 | heparin binding                                            | 2 of 6765 in the list | 2 of 12752 in the genome | 1 | CCG027004.1,CCG019560.1 |
| GO:0008446 | GDP-mannose 4,6-<br>dehydratase                            | 2 of 6765 in the list | 2 of 12752 in the genome | 1 | CCG022027.1,CCG006998.1 |
| GO:0008508 | bile acid:sodium<br>symporter activity                     | 2 of 6765 in the list | 2 of 12752 in the genome | 1 | CCG016654.1,CCG010222.1 |

|            |                                                      |                       |                          |   |                         |
|------------|------------------------------------------------------|-----------------------|--------------------------|---|-------------------------|
| GO:0009378 | four-way junction<br>helicase activity               | 2 of 6765 in the list | 2 of 12752 in the genome | 1 | CCG000777.1,CCG000776.1 |
| GO:0009882 | blue light<br>photoreceptor                          | 2 of 6765 in the list | 2 of 12752 in the genome | 1 | CCG015893.1,CCG015924.1 |
| GO:0015125 | bile acid<br>transmembrane<br>transporter activity   | 2 of 6765 in the list | 2 of 12752 in the genome | 1 | CCG016654.1,CCG010222.1 |
| GO:0016421 | CoA carboxylase<br>activity                          | 2 of 6765 in the list | 2 of 12752 in the genome | 1 | CCG012408.1,CCG017097.1 |
| GO:0016426 | tRNA (adenine)<br>methyltransferase<br>activity      | 2 of 6765 in the list | 2 of 12752 in the genome | 1 | CCG004234.1,CCG023156.1 |
| GO:0016427 | tRNA (cytosine)<br>methyltransferase<br>activity     | 2 of 6765 in the list | 2 of 12752 in the genome | 1 | CCG002462.1,CCG010681.1 |
| GO:0016428 | tRNA (cytosine-5-)-<br>methyltransferase<br>activity | 2 of 6765 in the list | 2 of 12752 in the genome | 1 | CCG002462.1,CCG010681.1 |
| GO:0016429 | tRNA (adenine-N1-<br>)methyltransferase<br>activity  | 2 of 6765 in the list | 2 of 12752 in the genome | 1 | CCG004234.1,CCG023156.1 |
| GO:0016437 | tRNA<br>cytidyltransferase<br>activity               | 2 of 6765 in the list | 2 of 12752 in the genome | 1 | CCG003165.1,CCG013089.1 |
| GO:0016743 | carboxyl- or<br>carbamoyltransfera<br>se activity    | 2 of 6765 in the list | 2 of 12752 in the genome | 1 | CCG018108.1,CCG005938.1 |
| GO:0016768 | spermine synthase<br>activity                        | 2 of 6765 in the list | 2 of 12752 in the genome | 1 | CCG009515.2,CCG016005.1 |
| GO:0016838 | carbon-oxygen<br>lyase activity,<br>acting on        | 2 of 6765 in the list | 2 of 12752 in the genome | 1 | CCG021086.2,CCG023780.2 |

|            |                                                               |                       |                          |   |                         |
|------------|---------------------------------------------------------------|-----------------------|--------------------------|---|-------------------------|
| GO:0016889 | endodeoxyribonuclease activity, producing 3'-phosphomonoester | 2 of 6765 in the list | 2 of 12752 in the genome | 1 | CCG000979.1,CCG007263.1 |
| GO:0019107 | myristoyltransferase activity                                 | 2 of 6765 in the list | 2 of 12752 in the genome | 1 | CCG022255.1,CCG025177.1 |
| GO:0019212 | phosphatase inhibitor activity                                | 2 of 6765 in the list | 2 of 12752 in the genome | 1 | CCG009450.1,CCG017560.1 |
| GO:0030158 | protein xylosyltransferase activity                           | 2 of 6765 in the list | 2 of 12752 in the genome | 1 | CCG017559.1,CCG025840.1 |
| GO:0030337 | DNA polymerase processivity factor activity                   | 2 of 6765 in the list | 2 of 12752 in the genome | 1 | CCG026259.1,CCG011911.1 |
| GO:0030942 | endoplasmic reticulum signal peptide binding                  | 2 of 6765 in the list | 2 of 12752 in the genome | 1 | CCG018217.1,CCG020806.1 |
| GO:0030955 | potassium ion                                                 | 2 of 6765 in the list | 2 of 12752 in the genome | 1 | CCG019953.1,CCG017200.1 |
| GO:0031420 | alkali metal ion binding                                      | 2 of 6765 in the list | 2 of 12752 in the genome | 1 | CCG019953.1,CCG017200.1 |
| GO:0031491 | nucleosome                                                    | 2 of 6765 in the list | 2 of 12752 in the genome | 1 | CCG027348.1,CCG000575.1 |
| GO:0033170 | protein-DNA loading ATPase                                    | 2 of 6765 in the list | 2 of 12752 in the genome | 1 | CCG018583.1,CCG015312.2 |
| GO:0034023 | 5-(carboxyamino)imidazole ribonucleotide                      | 2 of 6765 in the list | 2 of 12752 in the genome | 1 | CCG028305.1,CCG017330.1 |
| GO:0035014 | phosphatidylinositol 3-kinase regulator activity              | 2 of 6765 in the list | 2 of 12752 in the genome | 1 | CCG027316.1,CCG019558.1 |
| GO:0035252 | UDP-xylosyltransferase activity                               | 2 of 6765 in the list | 2 of 12752 in the genome | 1 | CCG017559.1,CCG025840.1 |
| GO:0036002 | pre-mRNA binding                                              | 2 of 6765 in the list | 2 of 12752 in the genome | 1 | CCG004927.1,CCG000754.1 |

|            |                                                   |                        |                           |   |                                                                                                                                                                       |
|------------|---------------------------------------------------|------------------------|---------------------------|---|-----------------------------------------------------------------------------------------------------------------------------------------------------------------------|
| GO:0042285 | xylosyltransferase activity                       | 2 of 6765 in the list  | 2 of 12752 in the genome  | 1 | CCG017559.1,CCG025840.1                                                                                                                                               |
| GO:0043138 | 3'-5' DNA helicase activity                       | 2 of 6765 in the list  | 2 of 12752 in the genome  | 1 | CCG018799.1,CCG000490.1                                                                                                                                               |
| GO:0043140 | ATP-dependent 3'-5' DNA helicase                  | 2 of 6765 in the list  | 2 of 12752 in the genome  | 1 | CCG018799.1,CCG000490.1                                                                                                                                               |
| GO:0047429 | nucleoside-triphosphate diphosphatase activity    | 2 of 6765 in the list  | 2 of 12752 in the genome  | 1 | CCG010960.2,CCG016222.1                                                                                                                                               |
| GO:0048038 | quinone binding                                   | 2 of 6765 in the list  | 2 of 12752 in the genome  | 1 | CCG028581.1,CCG027545.1                                                                                                                                               |
| GO:0050113 | inositol oxygenase activity                       | 2 of 6765 in the list  | 2 of 12752 in the genome  | 1 | CCG006358.1,CCG005177.1                                                                                                                                               |
| GO:0050353 | trimethyllysine dioxygenase                       | 2 of 6765 in the list  | 2 of 12752 in the genome  | 1 | CCG020559.1,CCG026331.1                                                                                                                                               |
| GO:0050750 | low-density lipoprotein particle receptor binding | 2 of 6765 in the list  | 2 of 12752 in the genome  | 1 | CCG027004.1,CCG019560.1                                                                                                                                               |
| GO:0070325 | lipoprotein particle receptor binding             | 2 of 6765 in the list  | 2 of 12752 in the genome  | 1 | CCG027004.1,CCG019560.1                                                                                                                                               |
| GO:0070567 | cytidyltransferase activity                       | 2 of 6765 in the list  | 2 of 12752 in the genome  | 1 | CCG003165.1,CCG013089.1                                                                                                                                               |
| GO:0071949 | FAD binding                                       | 2 of 6765 in the list  | 2 of 12752 in the genome  | 1 | CCG015893.1,CCG015924.1                                                                                                                                               |
| GO:0097157 | pre-mRNA intronic binding                         | 2 of 6765 in the list  | 2 of 12752 in the genome  | 1 | CCG004927.1,CCG000754.1                                                                                                                                               |
| GO:0016836 | hydro-lyase activity                              | 14 of 6765 in the list | 23 of 12752 in the genome | 1 | CCG003173.1,CCG023350.1,CCG023355.1,CCG026511.1,CCG023354.1,CCG008959.2,CCG007610.1,CCG012249.1,CCG022453.1,CCG025277.1,CCG018453.1,CCG008960.1,CCG006998.1,CCG022027 |

|            |                                                      |                        |                           |   |                                                                                                                                                                                                                                                                                                                                                                                                                                                                                                                                                                                                 |
|------------|------------------------------------------------------|------------------------|---------------------------|---|-------------------------------------------------------------------------------------------------------------------------------------------------------------------------------------------------------------------------------------------------------------------------------------------------------------------------------------------------------------------------------------------------------------------------------------------------------------------------------------------------------------------------------------------------------------------------------------------------|
| GO:0015078 | hydrogen ion transmembrane transporter activity      | 48 of 6765 in the list | 85 of 12752 in the genome | 1 | CCG011932.1,CCG013032.1,CCG027229.1,CCG001649.1,CCG010159.1,CCG023640.1,CCG006864.1,CCG000585.1,CCG025348.1,CCG026839.1,CCG003662.1,CCG025989.2,CCG019619.1,CCG011381.1,CCG008422.1,CCG020879.1,CCG016495.1,CCG010112.1,CCG022464.1,CCG016956.1,CCG001066.1,CCG017614.1,CCG016304.1,CCG019678.1,CCG007724.1,CCG004605.1,CCG013643.1,CCG018319.2,CCG024297.1,CCG015410.1,CCG007862.1,CCG002038.1,CCG025107.1,CCG009142.1,CCG006450.1,CCG000148.1,CCG006486.1,CCG005924.2,CCG025450.1,CCG024407.1,CCG003501.1,CCG023751.1,CCG017826.1,CCG025914.2,CCG021934.1,CCG004908.1,CCG001285.1,CCG002671.2 |
| GO:0051536 | iron-sulfur cluster binding                          | 32 of 6765 in the list | 56 of 12752 in the genome | 1 | CCG023685.1,CCG005392.1,CCG023678.1,CCG012770.1,CCG015537.1,CCG026839.1,CCG023350.1,CCG012771.1,CCG024750.2,CCG020081.1,CCG024432.2,CCG010284.1,CCG012249.1,CCG021619.1,CCG018319.2,CCG007395.1,CCG027340.1,CCG010522.1,CCG017391.1,CCG015780.1,CCG007619.1,CCG010283.1,CCG003485.1,CCG011237.1,CCG013610.1,CCG020186.1,CCG012797.1,CCG027545.1,CCG012769.2,CCG015870.1,CCG028520.1,CCG025096.1                                                                                                                                                                                                 |
| GO:0051540 | metal cluster binding                                | 32 of 6765 in the list | 56 of 12752 in the genome | 1 | CCG023685.1,CCG005392.1,CCG023678.1,CCG012770.1,CCG015537.1,CCG026839.1,CCG023350.1,CCG012771.1,CCG024750.2,CCG020081.1,CCG024432.2,CCG010284.1,CCG012249.1,CCG021619.1,CCG018319.2,CCG007395.1,CCG027340.1,CCG010522.1,CCG017391.1,CCG015780.1,CCG007619.1,CCG010283.1,CCG003485.1,CCG011237.1,CCG013610.1,CCG020186.1,CCG012797.1,CCG027545.1,CCG012769.2,CCG015870.1,CCG028520.1,CCG025096.1                                                                                                                                                                                                 |
| GO:0004176 | ATP-dependent peptidase activity                     | 6 of 6765 in the list  | 9 of 12752 in the genome  | 1 | CCG019148.1,CCG022995.1,CCG011803.1,CCG022994.1,CCG022996.1,CCG005089.1                                                                                                                                                                                                                                                                                                                                                                                                                                                                                                                         |
| GO:0005310 | dicarboxylic acid transmembrane transporter activity | 6 of 6765 in the list  | 9 of 12752 in the genome  | 1 | CCG024382.1,CCG027758.1,CCG013708.1,CCG024383.1,CCG026707.1,CCG016959.1                                                                                                                                                                                                                                                                                                                                                                                                                                                                                                                         |
| GO:0017153 | sodium:dicarboxylate symporter                       | 6 of 6765 in the list  | 9 of 12752 in the genome  | 1 | CCG024382.1,CCG027758.1,CCG013708.1,CCG024383.1,CCG026707.1,CCG016959.1                                                                                                                                                                                                                                                                                                                                                                                                                                                                                                                         |

|            |                                                                                                                                                                                |                        |                            |   |                                                                                                                                                                                                                                                                                                                                                                                                                                                                                                                                                                                                                                                                                                                                                                                                                                                                                                                                                                                                                                                                                                                                                                         |
|------------|--------------------------------------------------------------------------------------------------------------------------------------------------------------------------------|------------------------|----------------------------|---|-------------------------------------------------------------------------------------------------------------------------------------------------------------------------------------------------------------------------------------------------------------------------------------------------------------------------------------------------------------------------------------------------------------------------------------------------------------------------------------------------------------------------------------------------------------------------------------------------------------------------------------------------------------------------------------------------------------------------------------------------------------------------------------------------------------------------------------------------------------------------------------------------------------------------------------------------------------------------------------------------------------------------------------------------------------------------------------------------------------------------------------------------------------------------|
| GO:0016798 | hydrolase activity, acting on glycosyl bonds                                                                                                                                   | 84 of 6765 in the list | 152 of 12752 in the genome | 1 | CCG004122.1,CCG028547.1,CCG015062.1,CCG015677.1,CCG027015.1,CCG018613.1,CCG023324.1,CCG004020.1,CCG001355.1,CCG016477.1,CCG014760.1,CCG012048.1,CCG019825.2,CCG001590.1,CCG025412.1,CCG015610.1,CCG023748.1,CCG016445.1,CCG023374.1,CCG004549.1,CCG020793.1,CCG005485.1,CCG010809.1,CCG006822.1,CCG023890.1,CCG022430.1,CCG024792.1,CCG004760.1,CCG016612.1,CCG002369.1,CCG015235.1,CCG010652.1,CCG010019.1,CCG017651.1,CCG028106.1,CCG023795.2,CCG022108.2,CCG009169.1,CCG003216.1,CCG010726.2,CCG028548.1,CCG025362.1,CCG013509.1,CCG002418.1,CCG002600.1,CCG020739.1,CCG012740.1,CCG021117.1,CCG022320.1,CCG008484.1,CCG003765.1,CCG023505.2,CCG019082.1,CCG010078.1,CCG006671.1,CCG025962.1,CCG005486.1,CCG026284.1,CCG025364.1,CCG008483.1,CCG007786.1,CCG027708.4,CCG010818.1,CCG010414.1,CCG016538.1,CCG011451.2,CCG005487.1,CCG001518.1,CCG024829.1,CCG025361.1,CCG021807.1,CCG019032.1,CCG009375.1,CCG009334.1,CCG016373.1,CCG002417.1,CCG023420.1,CCG007200.2,CCG011996.1,CCG023431.1,CCG023499.1,CCG002599.1,CCG025015.1,CCG015680.1,CCG018029.3,CCG018054.1,CCG005286.1,CCG025827.1,CCG018923.1,CCG024433.1,CCG018055.1,CCG015679.1,CCG024665.1,CCG011327.1 |
| GO:0016715 | oxidoreductase activity, acting on paired donors, with incorporation or reduction of molecular oxygen, reduced ascorbate as one donor, and incorporation of one atom of oxygen | 11 of 6765 in the list | 18 of 12752 in the genome  | 1 | CCG015680.1,CCG018029.3,CCG018054.1,CCG005286.1,CCG025827.1,CCG018923.1,CCG024433.1,CCG018055.1,CCG015679.1,CCG024665.1,CCG011327.1                                                                                                                                                                                                                                                                                                                                                                                                                                                                                                                                                                                                                                                                                                                                                                                                                                                                                                                                                                                                                                     |
| GO:0005085 | guanylnucleotide exchange factor activity                                                                                                                                      | 40 of 6765 in the list | 71 of 12752 in the genome  | 1 | CCG006050.2,CCG021263.1,CCG026214.1,CCG023484.1,CCG009980.1,CCG010808.1,CCG009512.1,CCG025470.1,CCG022334.1,CCG008892.2,CCG008152.1,CCG010849.1,CCG003602.1,CCG004884.2,CCG022749.1,CCG018380.1,CCG018015.1,CCG010329.2,CCG01579.1,CCG021483.1,CCG028136.1,CCG028651.1,CCG022841.1,CCG014466.1,CCG008035.1,CCG003049.1,CCG000596.1,CCG019585.1,CCG012670.1,CCG025667.2,CCG010270.1,CCG022420.1,CCG009510.1,CCG018222.1,CCG020723.1,CCG021294.1,CCG010157.1,CCG000000.1,CCG011122.1,CCG000070.1                                                                                                                                                                                                                                                                                                                                                                                                                                                                                                                                                                                                                                                                          |

|            |                                                     |                        |                           |   |                                                                                                                                                                                                                                                                                                                                                                                                                                                                                                 |
|------------|-----------------------------------------------------|------------------------|---------------------------|---|-------------------------------------------------------------------------------------------------------------------------------------------------------------------------------------------------------------------------------------------------------------------------------------------------------------------------------------------------------------------------------------------------------------------------------------------------------------------------------------------------|
| GO:0015291 | secondary active transmembrane transporter activity | 40 of 6765 in the list | 71 of 12752 in the genome | 1 | CCG010710.1,CCG009082.1,CCG023060.1,CCG023980.1,CCG027718.1,CCG000210.1,CCG025309.1,CCG016128.1,CCG028141.1,CCG016245.1,CCG017230.3,CCG027758.1,CCG024383.1,CCG026707.1,CCG022789.1,CCG017552.1,CCG016956.1,CCG016326.1,CCG013708.1,CCG023191.1,CCG010222.1,CCG005140.1,CCG012096.1,CCG024382.1,CCG012061.1,CCG024034.1,CCG026799.1,CCG027185.1,CCG010711.1,CCG023190.1,CCG026151.1,CCG012350.1,CCG016959.1,CCG009022.2,CCG017641.1,CCG016654.1,CCG013420.1,CCG007599.1,CCG009071.2,CCG016979.1 |
| GO:0005096 | GTPase activator activity                           | 35 of 6765 in the list | 62 of 12752 in the genome | 1 | CCG016454.1,CCG021442.1,CCG000807.1,CCG022083.1,CCG025433.1,CCG012519.1,CCG004132.1,CCG017369.1,CCG024000.1,CCG016965.1,CCG022676.1,CCG027878.1,CCG024809.1,CCG009024.1,CCG015333.1,CCG002338.1,CCG002971.1,CCG002109.1,CCG025178.1,CCG021151.1,CCG005105.1,CCG022394.1,CCG011341.1,CCG016027.1,CCG019462.1,CCG019947.1,CCG025554.1,CCG013303.1,CCG007631.1,CCG013203.1,CCG016181.1,CCG018776.1,CCG019990.1                                                                                     |
| GO:0051920 | peroxiredoxin activity                              | 7 of 6765 in the list  | 11 of 12752 in the genome | 1 | CCG009904.1,CCG009650.1,CCG013816.1,CCG007420.1,CCG019138.2,CCG019096.1,CCG000960.1                                                                                                                                                                                                                                                                                                                                                                                                             |

|            |                                                          |                        |                            |   |                                                                                                                                                                                                                                                                                                                                                                                                                                                                                                                                                                                                                                                                                                                                                                                                                                                                                                                                                                                                                                                                                                                                                                                                        |
|------------|----------------------------------------------------------|------------------------|----------------------------|---|--------------------------------------------------------------------------------------------------------------------------------------------------------------------------------------------------------------------------------------------------------------------------------------------------------------------------------------------------------------------------------------------------------------------------------------------------------------------------------------------------------------------------------------------------------------------------------------------------------------------------------------------------------------------------------------------------------------------------------------------------------------------------------------------------------------------------------------------------------------------------------------------------------------------------------------------------------------------------------------------------------------------------------------------------------------------------------------------------------------------------------------------------------------------------------------------------------|
| GO:0016757 | transferase activity,<br>transferring<br>glycosyl groups | 97 of 6765 in the list | 177 of 12752 in the genome | 1 | CCG019369.1,CCG017381.1,CCG019892.1,CCG021819.1,CCG018536.1,CCG011999.1,CCG022363.1,CCG023617.1,CCG007885.1,CCG017331.1,CCG006329.1,CCG011023.1,CCG017947.1,CCG007766.1,CCG001602.1,CCG020802.1,CCG018377.1,CCG026045.1,CCG019842.1,CCG021053.1,CCG014456.1,CCG007330.1,CCG028549.1,CCG028144.2,CCG004091.1,CCG000411.1,CCG011531.1,CCG009494.1,CCG015843.1,CCG025472.1,CCG004529.1,CCG018432.1,CCG028311.1,CCG003880.1,CCG022209.1,CCG001219.2,CCG012199.1,CCG014839.1,CCG023143.1,CCG014579.1,CCG003726.1,CCG015047.1,CCG028332.1,CCG007987.1,CCG017389.1,CCG023725.1,CCG019210.1,CCG016415.1,CCG007948.1,CCG002930.1,CCG023883.1,CCG000360.1,CCG010280.1,CCG010700.1,CCG004556.1,CCG023885.1,CCG017559.1,CCG015146.1,CCG002316.1,CCG013390.1,CCG000389.2,CCG020944.1,CCG019298.1,CCG009596.1,CCG012268.1,CCG006010.1,CCG009928.1,CCG016003.1,CCG008130.1,CCG027416.1,CCG009165.1,CCG000388.1,CCG004440.1,CCG004641.1,CCG003677.1,CCG003247.1,CCG010460.1,CCG014304.1,CCG004142.1,CCG011966.1,CCG026215.1,CCG027131.1,CCG017197.1,CCG013985.1,CCG006213.1,CCG001180.1,CCG012437.1,CCG000552.1,CCG010986.1,CCG004188.3,CCG006221.1,CCG010360.1,CCG027125.1,CCG000492.1,CCG003277.1,CCG025840.1,CCG003 |
| GO:0008047 | enzyme activator<br>activity                             | 36 of 6765 in the list | 64 of 12752 in the genome  | 1 | CCG016454.1,CCG021442.1,CCG000807.1,CCG022083.1,CCG025433.1,CCG012519.1,CCG004132.1,CCG017369.1,CCG024000.1,CCG016965.1,CCG022676.1,CCG027878.1,CCG024809.1,CCG009024.1,CCG015333.1,CCG002338.1,CCG002971.1,CCG002109.1,CCG025178.1,CCG021151.1,CCG005105.1,CCG022394.1,CCG011341.1,CCG016027.1,CCG003448.1,CCG019462.1,CCG019947.1,CCG025554.1,CCG013303.1,CCG007631.1,CCG013203.1,CCG016181.1,CCG018776.1,CCG010260.1,CCG002166.1,CCG002864.1                                                                                                                                                                                                                                                                                                                                                                                                                                                                                                                                                                                                                                                                                                                                                        |
| GO:0000213 | tRNA-intron<br>endonuclease                              | 3 of 6765 in the list  | 4 of 12752 in the genome   | 1 | CCG000583.2,CCG009393.1,CCG000939.1                                                                                                                                                                                                                                                                                                                                                                                                                                                                                                                                                                                                                                                                                                                                                                                                                                                                                                                                                                                                                                                                                                                                                                    |
| GO:0004022 | alcohol<br>dehydrogenase<br>(NAD) activity               | 3 of 6765 in the list  | 4 of 12752 in the genome   | 1 | CCG024932.1,CCG014070.1,CCG016586.1                                                                                                                                                                                                                                                                                                                                                                                                                                                                                                                                                                                                                                                                                                                                                                                                                                                                                                                                                                                                                                                                                                                                                                    |
| GO:0004140 | dephospho-CoA<br>kinase activity                         | 3 of 6765 in the list  | 4 of 12752 in the genome   | 1 | CCG021336.1,CCG013999.1,CCG026812.1                                                                                                                                                                                                                                                                                                                                                                                                                                                                                                                                                                                                                                                                                                                                                                                                                                                                                                                                                                                                                                                                                                                                                                    |

|            |                                                       |                       |                          |   |                                     |
|------------|-------------------------------------------------------|-----------------------|--------------------------|---|-------------------------------------|
| GO:0004370 | glycerol kinase activity                              | 3 of 6765 in the list | 4 of 12752 in the genome | 1 | CCG000970.1,CCG025146.1,CCG012558.1 |
| GO:0004512 | inositol-3-phosphate                                  | 3 of 6765 in the list | 4 of 12752 in the genome | 1 | CCG014174.1,CCG023757.1,CCG016653.1 |
| GO:0004703 | G-protein coupled receptor kinase activity            | 3 of 6765 in the list | 4 of 12752 in the genome | 1 | CCG017266.1,CCG001300.1,CCG005531.1 |
| GO:0004822 | isoleucine-tRNA ligase activity                       | 3 of 6765 in the list | 4 of 12752 in the genome | 1 | CCG009878.1,CCG006231.1,CCG003528.1 |
| GO:0004827 | proline-tRNA ligase activity                          | 3 of 6765 in the list | 4 of 12752 in the genome | 1 | CCG001811.1,CCG002018.1,CCG024526.1 |
| GO:0004828 | serine-tRNA ligase activity                           | 3 of 6765 in the list | 4 of 12752 in the genome | 1 | CCG019545.1,CCG021716.1,CCG014396.1 |
| GO:0005217 | intracellular ligand-gated ion channel activity       | 3 of 6765 in the list | 4 of 12752 in the genome | 1 | CCG026796.1,CCG027585.1,CCG020400.2 |
| GO:0005245 | voltage-gated calcium channel activity                | 3 of 6765 in the list | 4 of 12752 in the genome | 1 | CCG025568.1,CCG014448.1,CCG005277.1 |
| GO:0005452 | inorganic anion exchanger activity                    | 3 of 6765 in the list | 4 of 12752 in the genome | 1 | CCG023190.1,CCG012061.1,CCG023191.1 |
| GO:0008093 | cytoskeletal adaptor activity                         | 3 of 6765 in the list | 4 of 12752 in the genome | 1 | CCG018859.3,CCG017033.1,CCG015583.1 |
| GO:0008474 | palmitoyl-(protein) hydrolase activity                | 3 of 6765 in the list | 4 of 12752 in the genome | 1 | CCG025233.1,CCG009167.1,CCG011527.1 |
| GO:0008479 | queuine tRNA-ribosyltransferase activity              | 3 of 6765 in the list | 4 of 12752 in the genome | 1 | CCG027125.1,CCG004440.1,CCG010460.1 |
| GO:0015137 | citrate transmembrane transporter activity            | 3 of 6765 in the list | 4 of 12752 in the genome | 1 | CCG008734.1,CCG004637.1,CCG010965.1 |
| GO:0015142 | tricarboxylic acid transmembrane transporter activity | 3 of 6765 in the list | 4 of 12752 in the genome | 1 | CCG008734.1,CCG004637.1,CCG010965.1 |

|            |                                                         |                        |                           |   |                                                                                                                                                                                                                                                                                                                                                                                                                                                                                                                                                 |
|------------|---------------------------------------------------------|------------------------|---------------------------|---|-------------------------------------------------------------------------------------------------------------------------------------------------------------------------------------------------------------------------------------------------------------------------------------------------------------------------------------------------------------------------------------------------------------------------------------------------------------------------------------------------------------------------------------------------|
| GO:0015278 | calcium-release channel activity                        | 3 of 6765 in the list  | 4 of 12752 in the genome  | 1 | CCG026796.1,CCG027585.1,CCG020400.2                                                                                                                                                                                                                                                                                                                                                                                                                                                                                                             |
| GO:0015301 | anion:anion antiporter activity                         | 3 of 6765 in the list  | 4 of 12752 in the genome  | 1 | CCG023190.1,CCG012061.1,CCG023191.1                                                                                                                                                                                                                                                                                                                                                                                                                                                                                                             |
| GO:0015926 | glucosidase activity                                    | 3 of 6765 in the list  | 4 of 12752 in the genome  | 1 | CCG022430.1,CCG011451.2,CCG022108.2                                                                                                                                                                                                                                                                                                                                                                                                                                                                                                             |
| GO:0016500 | protein-hormone receptor activity                       | 3 of 6765 in the list  | 4 of 12752 in the genome  | 1 | CCG008755.1,CCG019721.1,CCG024664.1                                                                                                                                                                                                                                                                                                                                                                                                                                                                                                             |
| GO:0016774 | phosphotransferase activity, carboxyl group as acceptor | 3 of 6765 in the list  | 4 of 12752 in the genome  | 1 | CCG017111.1,CCG020616.1,CCG007981.1                                                                                                                                                                                                                                                                                                                                                                                                                                                                                                             |
| GO:0016872 | intramolecular lyase activity                           | 3 of 6765 in the list  | 4 of 12752 in the genome  | 1 | CCG014174.1,CCG023757.1,CCG016653.1                                                                                                                                                                                                                                                                                                                                                                                                                                                                                                             |
| GO:0016885 | ligase activity, forming carbon-carbon bonds            | 3 of 6765 in the list  | 4 of 12752 in the genome  | 1 | CCG012408.1,CCG004388.1,CCG017097.1                                                                                                                                                                                                                                                                                                                                                                                                                                                                                                             |
| GO:0016892 | endoribonuclease activity, producing 3'-                | 3 of 6765 in the list  | 4 of 12752 in the genome  | 1 | CCG000583.2,CCG009393.1,CCG000939.1                                                                                                                                                                                                                                                                                                                                                                                                                                                                                                             |
| GO:0017048 | Rho GTPase                                              | 3 of 6765 in the list  | 4 of 12752 in the genome  | 1 | CCG000469.1,CCG018647.1,CCG018646.1                                                                                                                                                                                                                                                                                                                                                                                                                                                                                                             |
| GO:0017124 | SH3 domain                                              | 3 of 6765 in the list  | 4 of 12752 in the genome  | 1 | CCG018859.3,CCG017033.1,CCG015583.1                                                                                                                                                                                                                                                                                                                                                                                                                                                                                                             |
| GO:0043546 | molybdopterin cofactor binding                          | 3 of 6765 in the list  | 4 of 12752 in the genome  | 1 | CCG010284.1,CCG025096.1,CCG010283.1                                                                                                                                                                                                                                                                                                                                                                                                                                                                                                             |
| GO:0070403 | NAD+ binding                                            | 3 of 6765 in the list  | 4 of 12752 in the genome  | 1 | CCG022056.1,CCG016480.1,CCG000835.1                                                                                                                                                                                                                                                                                                                                                                                                                                                                                                             |
| GO:0051082 | unfolded protein binding                                | 44 of 6765 in the list | 79 of 12752 in the genome | 1 | CCG003491.1,CCG019684.1,CCG023237.1,CCG020060.1,CCG013640.1,CCG023148.1,CCG025006.1,CCG025005.1,CCG009881.1,CCG000247.1,CCG002982.1,CCG000546.1,CCG012726.1,CCG009266.1,CCG011939.1,CCG025031.1,CCG022993.1,CCG000413.3,CCG024791.1,CCG008539.2,CCG025714.1,CCG022509.1,CCG002099.1,CCG017244.1,CCG016271.1,CCG011874.1,CCG005429.3,CCG026501.1,CCG002446.2,CCG027653.1,CCG002465.1,CCG003657.2,CCG007108.1,CCG005738.1,CCG026112.1,CCG003480.1,CCG017448.1,CCG011095.1,CCG026959.1,CCG005024.1,CCG003210.1,CCG025000.1,CCG011100.1,CCG000010.1 |

|            |                                                                         |                        |                           |   |                                                                                                                                                                       |
|------------|-------------------------------------------------------------------------|------------------------|---------------------------|---|-----------------------------------------------------------------------------------------------------------------------------------------------------------------------|
| GO:0046933 | proton-transporting ATP synthase activity, rotational mechanism         | 13 of 6765 in the list | 22 of 12752 in the genome | 1 | CCG015410.1,CCG002038.1,CCG023640.1,CCG001066.1,CCG025348.1,CCG007724.1,CCG019678.1,CCG025989.2,CCG006486.1,CCG021934.1,CCG019619.1,CCG005924.2,CCG001285.1           |
| GO:0005044 | scavenger receptor activity                                             | 8 of 6765 in the list  | 13 of 12752 in the genome | 1 | CCG016111.1,CCG018925.1,CCG012023.1,CCG018101.1,CCG02167.1,CCG019315.1,CCG001011.2,CCG027393.1                                                                        |
| GO:0008083 | growth factor activity                                                  | 8 of 6765 in the list  | 13 of 12752 in the genome | 1 | CCG027345.2,CCG012808.1,CCG020988.1,CCG007219.1,CCG012102.1,CCG003273.1,CCG007821.1,CCG002448.1                                                                       |
| GO:0038024 | cargo receptor activity                                                 | 8 of 6765 in the list  | 13 of 12752 in the genome | 1 | CCG016111.1,CCG018925.1,CCG012023.1,CCG018101.1,CCG02167.1,CCG019315.1,CCG001011.2,CCG027393.1                                                                        |
| GO:0004568 | chitinase activity                                                      | 14 of 6765 in the list | 24 of 12752 in the genome | 1 | CCG021117.1,CCG015610.1,CCG002417.1,CCG023420.1,CCG004020.1,CCG016477.1,CCG002418.1,CCG025962.1,CCG020793.1,CCG010019.1,CCG012048.1,CCG011996.1,CCG024829.1,CCG023890 |
| GO:0004045 | aminoacyl-tRNA hydrolase activity                                       | 4 of 6765 in the list  | 6 of 12752 in the genome  | 1 | CCG026530.1,CCG028184.1,CCG001788.1,CCG001051.1                                                                                                                       |
| GO:0004470 | malic enzyme                                                            | 4 of 6765 in the list  | 6 of 12752 in the genome  | 1 | CCG018290.1,CCG019111.1,CCG019112.1,CCG018289.1                                                                                                                       |
| GO:0004550 | nucleoside diphosphate kinase activity                                  | 4 of 6765 in the list  | 6 of 12752 in the genome  | 1 | CCG021110.1,CCG006529.1,CCG017995.1,CCG007417.1                                                                                                                       |
| GO:0004579 | dolichyl-diphosphooligosaccharide-protein glycotransferase activity     | 4 of 6765 in the list  | 6 of 12752 in the genome  | 1 | CCG018536.1,CCG009928.1,CCG023617.1,CCG004091.1                                                                                                                       |
| GO:0004656 | procollagen-proline 4-dioxygenase                                       | 4 of 6765 in the list  | 6 of 12752 in the genome  | 1 | CCG000895.1,CCG023114.1,CCG002783.1,CCG019431.1                                                                                                                       |
| GO:0004748 | ribonucleoside-diphosphate reductase activity, thioredoxin disulfide as | 4 of 6765 in the list  | 6 of 12752 in the genome  | 1 | CCG000217.1,CCG004191.1,CCG024232.1,CCG015929.1                                                                                                                       |
| GO:0004784 | superoxide dismutase activity                                           | 4 of 6765 in the list  | 6 of 12752 in the genome  | 1 | CCG011248.1,CCG026431.1,CCG012208.1,CCG012209.1                                                                                                                       |
| GO:0004813 | alanine-tRNA ligase activity                                            | 4 of 6765 in the list  | 6 of 12752 in the genome  | 1 | CCG000138.1,CCG023277.1,CCG008789.1,CCG010191.3                                                                                                                       |

|            |                                                                                    |                        |                           |   |                                                                                                                                                                                                 |
|------------|------------------------------------------------------------------------------------|------------------------|---------------------------|---|-------------------------------------------------------------------------------------------------------------------------------------------------------------------------------------------------|
| GO:0008239 | dipeptidyl-peptidase activity                                                      | 4 of 6765 in the list  | 6 of 12752 in the genome  | 1 | CCG020794.1,CCG003767.1,CCG014571.1,CCG025777.1                                                                                                                                                 |
| GO:0016671 | oxidoreductase activity, acting on a sulfur group of donors, disulfide as acceptor | 4 of 6765 in the list  | 6 of 12752 in the genome  | 1 | CCG011390.1,CCG011391.2,CCG003110.1,CCG020414.1                                                                                                                                                 |
| GO:0016721 | oxidoreductase activity, acting on superoxide radicals as acceptor                 | 4 of 6765 in the list  | 6 of 12752 in the genome  | 1 | CCG011248.1,CCG026431.1,CCG012208.1,CCG012209.1                                                                                                                                                 |
| GO:0016725 | oxidoreductase activity, acting on CH or CH2 groups                                | 4 of 6765 in the list  | 6 of 12752 in the genome  | 1 | CCG000217.1,CCG004191.1,CCG024232.1,CCG015929.1                                                                                                                                                 |
| GO:0016728 | oxidoreductase activity, acting on CH or CH2 groups, disulfide as                  | 4 of 6765 in the list  | 6 of 12752 in the genome  | 1 | CCG000217.1,CCG004191.1,CCG024232.1,CCG015929.1                                                                                                                                                 |
| GO:0019798 | procollagen-proline dioxygenase                                                    | 4 of 6765 in the list  | 6 of 12752 in the genome  | 1 | CCG000895.1,CCG023114.1,CCG002783.1,CCG019431.1                                                                                                                                                 |
| GO:0031543 | peptidyl-proline dioxygenase                                                       | 4 of 6765 in the list  | 6 of 12752 in the genome  | 1 | CCG000895.1,CCG023114.1,CCG002783.1,CCG019431.1                                                                                                                                                 |
| GO:0031545 | peptidyl-proline 4-dioxygenase                                                     | 4 of 6765 in the list  | 6 of 12752 in the genome  | 1 | CCG000895.1,CCG023114.1,CCG002783.1,CCG019431.1                                                                                                                                                 |
| GO:0031406 | carboxylic acid binding                                                            | 16 of 6765 in the list | 28 of 12752 in the genome | 1 | CCG009496.1,CCG025320.1,CCG026331.1,CCG009139.1,CCG019431.1,CCG019258.1,CCG020559.1,CCG008895.1,CCG002783.1,CCG005938.1,CCG017230.3,CCG018108.1,CCG023114.1,CCG018575.1,CCG015802.1,CCG021947.1 |
| GO:0043177 | organic acid binding                                                               | 16 of 6765 in the list | 28 of 12752 in the genome | 1 | CCG009496.1,CCG025320.1,CCG026331.1,CCG009139.1,CCG019431.1,CCG019258.1,CCG020559.1,CCG008895.1,CCG002783.1,CCG005938.1,CCG017230.3,CCG018108.1,CCG023114.1,CCG018575.1,CCG015802.1,CCG021947.1 |

|            |                                             |                         |                             |   |                                                                                                                                                                                                                                                                                                                                                                                                                                                                                                                                                                                                                                                                                                                                                                                                                                                                                                                                                                                                                                                                                                                                                                                                                                                                                                                                                                                                                                                                                                                                                                                                                                                                                                                          |
|------------|---------------------------------------------|-------------------------|-----------------------------|---|--------------------------------------------------------------------------------------------------------------------------------------------------------------------------------------------------------------------------------------------------------------------------------------------------------------------------------------------------------------------------------------------------------------------------------------------------------------------------------------------------------------------------------------------------------------------------------------------------------------------------------------------------------------------------------------------------------------------------------------------------------------------------------------------------------------------------------------------------------------------------------------------------------------------------------------------------------------------------------------------------------------------------------------------------------------------------------------------------------------------------------------------------------------------------------------------------------------------------------------------------------------------------------------------------------------------------------------------------------------------------------------------------------------------------------------------------------------------------------------------------------------------------------------------------------------------------------------------------------------------------------------------------------------------------------------------------------------------------|
| GO:0016491 | oxidoreductase activity                     | 557 of 6765 in the list | 1042 of 12752 in the genome | 1 | CCG012202.1,CCG011932.1,CCG010159.1,CCG000184.1,CCG014880.1,CCG015926.1,CCG019182.1,CCG020913.1,CCG004595.1,CCG025108.1,CCG009904.1,CCG016220.1,CCG010284.1,CCG013059.1,CCG025836.1,CCG012949.1,CCG024297.1,CCG020744.1,CCG012578.1,CCG007424.2,CCG009496.1,CCG010038.1,CCG013062.1,CCG025307.1,CCG025346.1,CCG017624.1,CCG000948.1,CCG022025.2,CCG005053.1,CCG011237.1,CCG024123.2,CCG000944.1,CCG007420.1,CCG011722.1,CCG007696.1,CCG003063.1,CCG015450.1,CCG018253.1,CCG020660.1,CCG018625.1,CCG011778.1,CCG011231.2,CCG016495.1,CCG013816.1,CCG023451.1,CCG005913.1,CCG027190.1,CCG024119.1,CCG018290.1,CCG012339.1,CCG018257.1,CCG022399.1,CCG025410.1,CCG017982.1,CCG011895.1,CCG002113.1,CCG011891.1,CCG000775.1,CCG001163.1,CCG013610.1,CCG002231.1,CCG028073.1,CCG008902.1,CCG025096.1,CCG019844.1,CCG026016.1,CCG005588.1,CCG005162.1,CCG015537.1,CCG013246.1,CCG011491.1,CCG008895.1,CCG024878.1,CCG002783.1,CCG000391.1,CCG027472.1,CCG003851.1,CCG007729.1,CCG009650.1,CCG027211.1,CCG026736.1,CCG000730.2,CCG011793.1,CCG024232.1,CCG019229.1,CCG019263.1,CCG010395.3,CCG007620.3,CCG002514.1,CCG026910.1,CCG005210.1,CCG024447.1,CCG000895.1,CCG018462.1,CCG017497.1,CCG004662.1,CCG012089.1,CCG020281.1,CCG013044.1,CCG027048.1,CCG028204.1,CCG024932.1,CCG021072.1,CCG018282.1,CCG020707.1,CCG024798.1,CCG002466.1,CCG004962.1,CCG006600.1,CCG008916.1,CCG026839.1,CCG026852.1,CCG006193.1,CCG018921.1,CCG017894.1,CCG008931.1,CCG024069.1,CCG018553.1,CCG006059.1,CCG021982.1,CCG007862.1,CCG026331.1,CCG023615.1,CCG025032.1,CCG006450.1,CCG021250.1,CCG013340.1,CCG019096.1,CCG004916.1,CCG006760.1,CCG002399.1,CCG027545.1,CCG011175.1,CCG003110.1,CCG014453.1,CCG018927.1,CCG001530.1,CCG028572.1, |
| GO:0000062 | fatty-acyl-CoA                              | 5 of 6765 in the list   | 8 of 12752 in the genome    | 1 | CCG014316.1,CCG020015.2,CCG013009.1,CCG025698.1,CCG009                                                                                                                                                                                                                                                                                                                                                                                                                                                                                                                                                                                                                                                                                                                                                                                                                                                                                                                                                                                                                                                                                                                                                                                                                                                                                                                                                                                                                                                                                                                                                                                                                                                                   |
| GO:0003917 | DNA topoisomerase type                      | 5 of 6765 in the list   | 8 of 12752 in the genome    | 1 | CCG022918.1,CCG008972.1,CCG027183.2,CCG016201.1,CCG000166.1                                                                                                                                                                                                                                                                                                                                                                                                                                                                                                                                                                                                                                                                                                                                                                                                                                                                                                                                                                                                                                                                                                                                                                                                                                                                                                                                                                                                                                                                                                                                                                                                                                                              |
| GO:0005242 | inward rectifier potassium channel activity | 5 of 6765 in the list   | 8 of 12752 in the genome    | 1 | CCG023530.2,CCG006587.2,CCG027182.1,CCG006588.2,CCG027184.1                                                                                                                                                                                                                                                                                                                                                                                                                                                                                                                                                                                                                                                                                                                                                                                                                                                                                                                                                                                                                                                                                                                                                                                                                                                                                                                                                                                                                                                                                                                                                                                                                                                              |

|            |                                                                                  |                        |                           |   |                                                                                                                                                                                                                                                                                                                                            |
|------------|----------------------------------------------------------------------------------|------------------------|---------------------------|---|--------------------------------------------------------------------------------------------------------------------------------------------------------------------------------------------------------------------------------------------------------------------------------------------------------------------------------------------|
| GO:0008440 | inositol-1,4,5-trisphosphate 3-kinase activity                                   | 5 of 6765 in the list  | 8 of 12752 in the genome  | 1 | CCG016649.1,CCG018192.1,CCG023058.2,CCG002382.1,CCG021938.1                                                                                                                                                                                                                                                                                |
| GO:0016854 | racemase and epimerase activity                                                  | 5 of 6765 in the list  | 8 of 12752 in the genome  | 1 | CCG024517.1,CCG018480.1,CCG022072.1,CCG002307.1,CCG018423.1                                                                                                                                                                                                                                                                                |
| GO:0016857 | racemase and epimerase activity, acting on carbohydrates and derivatives         | 5 of 6765 in the list  | 8 of 12752 in the genome  | 1 | CCG024517.1,CCG018480.1,CCG022072.1,CCG002307.1,CCG018423.1                                                                                                                                                                                                                                                                                |
| GO:0051766 | inositol trisphosphate                                                           | 5 of 6765 in the list  | 8 of 12752 in the genome  | 1 | CCG016649.1,CCG018192.1,CCG023058.2,CCG002382.1,CCG021938.1                                                                                                                                                                                                                                                                                |
| GO:0008081 | phosphoric diester hydrolase activity                                            | 19 of 6765 in the list | 34 of 12752 in the genome | 1 | CCG010628.1,CCG021023.1,CCG017798.1,CCG014647.1,CCG017772.1,CCG028418.1,CCG001012.1,CCG008603.1,CCG011074.1,CCG010255.1,CCG013139.1,CCG010257.1,CCG006013.1,CCG025387.1,CCG026695.1,CCG002520.1,CCG001759.1,CCG025932.1,CCG0                                                                                                               |
| GO:0008135 | translation factor activity, nucleic acid binding                                | 28 of 6765 in the list | 51 of 12752 in the genome | 1 | CCG005143.1,CCG021940.1,CCG021933.1,CCG004807.1,CCG005622.1,CCG021944.1,CCG018168.1,CCG000368.1,CCG018719.1,CCG027751.1,CCG018164.1,CCG014819.1,CCG001777.1,CCG027281.1,CCG000915.1,CCG024529.1,CCG006344.1,CCG024907.1,CCG014947.2,CCG026155.1,CCG021521.1,CCG008592.1,CCG026825.1,CCG007705.1,CCG003684.1,CCG000994.1,CCG000294.1,CCG016 |
| GO:0016627 | oxidoreductase activity, acting on the CH-CH group of donors                     | 28 of 6765 in the list | 51 of 12752 in the genome | 1 | CCG018446.1,CCG010836.1,CCG026752.1,CCG025357.1,CCG012727.1,CCG010539.1,CCG006571.1,CCG025521.1,CCG023521.1,CCG010541.1,CCG008916.1,CCG021335.1,CCG002449.1,CCG000591.1,CCG005053.1,CCG015290.1,CCG013610.1,CCG016614.1,CCG018614.1,CCG006391.1,CCG012576.1,CCG015293.1,CCG018851.1,CCG018444.1,CCG015331.1,CCG021378.1,CCG018445.1,CCG020 |
| GO:0016634 | oxidoreductase activity, acting on the CH-CH group of donors, oxygen as acceptor | 6 of 6765 in the list  | 10 of 12752 in the genome | 1 | CCG025521.1,CCG018851.1,CCG026752.1,CCG006391.1,CCG021335.1,CCG000591.1                                                                                                                                                                                                                                                                    |

|            |                                                                                      |                        |                            |   |                                                                                                                                                                                                                                                                                                                                                                                                                                                                                                                                                                                                                                                                                                                                                                                                                                                                                                                                                                                                                                                                                                                                                                                                        |
|------------|--------------------------------------------------------------------------------------|------------------------|----------------------------|---|--------------------------------------------------------------------------------------------------------------------------------------------------------------------------------------------------------------------------------------------------------------------------------------------------------------------------------------------------------------------------------------------------------------------------------------------------------------------------------------------------------------------------------------------------------------------------------------------------------------------------------------------------------------------------------------------------------------------------------------------------------------------------------------------------------------------------------------------------------------------------------------------------------------------------------------------------------------------------------------------------------------------------------------------------------------------------------------------------------------------------------------------------------------------------------------------------------|
| GO:0004181 | metallocarboxypeptidase activity                                                     | 22 of 6765 in the list | 40 of 12752 in the genome  | 1 | CCG003407.1,CCG016075.1,CCG023196.1,CCG005125.1,CCG002386.1,CCG007467.1,CCG002383.1,CCG012666.1,CCG014935.1,CCG028016.1,CCG005323.1,CCG016073.1,CCG011860.1,CCG023502.1,CCG003408.1,CCG019741.1,CCG014035.1,CCG022701.1,CCG019742.1,CCG008715.1,CCG017549.1,CCG016072.1                                                                                                                                                                                                                                                                                                                                                                                                                                                                                                                                                                                                                                                                                                                                                                                                                                                                                                                                |
| GO:0005086 | ARF guanyl-nucleotide exchange factor                                                | 7 of 6765 in the list  | 12 of 12752 in the genome  | 1 | CCG028651.1,CCG021263.1,CCG010157.1,CCG022749.1,CCG020983.1,CCG025470.1,CCG022420.1                                                                                                                                                                                                                                                                                                                                                                                                                                                                                                                                                                                                                                                                                                                                                                                                                                                                                                                                                                                                                                                                                                                    |
| GO:0016624 | oxidoreductase activity, acting on the aldehyde or oxo group of donors, disulfide as | 7 of 6765 in the list  | 12 of 12752 in the genome  | 1 | CCG009771.2,CCG004244.1,CCG019334.1,CCG011175.1,CCG020707.1,CCG001255.2,CCG001072.1                                                                                                                                                                                                                                                                                                                                                                                                                                                                                                                                                                                                                                                                                                                                                                                                                                                                                                                                                                                                                                                                                                                    |
| GO:0051020 | GTPase binding                                                                       | 7 of 6765 in the list  | 12 of 12752 in the genome  | 1 | CCG000469.1,CCG020723.1,CCG003049.1,CCG018647.1,CCG018646.1,CCG010270.1,CCG006273.1                                                                                                                                                                                                                                                                                                                                                                                                                                                                                                                                                                                                                                                                                                                                                                                                                                                                                                                                                                                                                                                                                                                    |
| GO:0030234 | enzyme regulator activity                                                            | 98 of 6765 in the list | 183 of 12752 in the genome | 1 | CCG016454.1,CCG014539.1,CCG021442.1,CCG025433.1,CCG014617.1,CCG012519.1,CCG026798.1,CCG022393.1,CCG028409.1,CCG008364.1,CCG024806.1,CCG024695.1,CCG027505.1,CCG014513.1,CCG024000.1,CCG001347.1,CCG016965.1,CCG027878.1,CCG015333.1,CCG002338.1,CCG002971.1,CCG016436.1,CCG010364.1,CCG005113.1,CCG025139.1,CCG003448.1,CCG021962.1,CCG011341.1,CCG019462.1,CCG018861.1,CCG016323.1,CCG006063.1,CCG002324.1,CCG002823.1,CCG002170.1,CCG011089.1,CCG000890.1,CCG027316.1,CCG021902.1,CCG012779.1,CCG016011.1,CCG013203.1,CCG018776.1,CCG010260.1,CCG019558.1,CCG002166.1,CCG002864.1,CCG011911.1,CCG016012.1,CCG021794.1,CCG004025.1,CCG000807.1,CCG022083.1,CCG003703.1,CCG004132.1,CCG025560.1,CCG017369.1,CCG002228.1,CCG026694.1,CCG010489.1,CCG026259.1,CCG016831.1,CCG003758.1,CCG022676.1,CCG024809.1,CCG009450.1,CCG009024.1,CCG016437.1,CCG012125.1,CCG023881.1,CCG002109.1,CCG011387.1,CCG021151.1,CCG025178.1,CCG001249.1,CCG005105.1,CCG022394.1,CCG021652.1,CCG016027.1,CCG023147.1,CCG008308.1,CCG021961.1,CCG004222.1,CCG014461.1,CCG021651.1,CCG017560.1,CCG019947.1,CCG027928.1,CCG025554.1,CCG013303.1,CCG010238.1,CCG007631.1,CCG017753.1,CCG016181.1,CCG024998.1,CCG014258.1,CCG025 |

|            |                                                      |                        |                            |   |                                                                                                                                                                                                                                                                                                                                                                                                                                                                                                                                                                                                                                                                                                                                                                                                                                                                                                             |
|------------|------------------------------------------------------|------------------------|----------------------------|---|-------------------------------------------------------------------------------------------------------------------------------------------------------------------------------------------------------------------------------------------------------------------------------------------------------------------------------------------------------------------------------------------------------------------------------------------------------------------------------------------------------------------------------------------------------------------------------------------------------------------------------------------------------------------------------------------------------------------------------------------------------------------------------------------------------------------------------------------------------------------------------------------------------------|
| GO:0004559 | alpha-mannosidase activity                           | 8 of 6765 in the list  | 14 of 12752 in the genome  | 1 | CCG012740.1,CCG016373.1,CCG010726.2,CCG014760.1,CCG004549.1,CCG017651.1,CCG007786.1,CCG028106.1                                                                                                                                                                                                                                                                                                                                                                                                                                                                                                                                                                                                                                                                                                                                                                                                             |
| GO:0015923 | mannosidase activity                                 | 8 of 6765 in the list  | 14 of 12752 in the genome  | 1 | CCG012740.1,CCG016373.1,CCG010726.2,CCG014760.1,CCG004549.1,CCG017651.1,CCG007786.1,CCG028106.1                                                                                                                                                                                                                                                                                                                                                                                                                                                                                                                                                                                                                                                                                                                                                                                                             |
| GO:0015171 | amino acid transmembrane transporter activity        | 9 of 6765 in the list  | 16 of 12752 in the genome  | 1 | CCG026667.1,CCG024222.1,CCG006348.1,CCG005768.1,CCG018073.1,CCG005769.1,CCG020840.1,CCG019407.1,CCG021349.1                                                                                                                                                                                                                                                                                                                                                                                                                                                                                                                                                                                                                                                                                                                                                                                                 |
| GO:0003993 | acid phosphatase activity                            | 10 of 6765 in the list | 18 of 12752 in the genome  | 1 | CCG003394.1,CCG012841.1,CCG008725.1,CCG023799.1,CCG006593.1,CCG024006.1,CCG015981.1,CCG015982.1,CCG002105.1,CC                                                                                                                                                                                                                                                                                                                                                                                                                                                                                                                                                                                                                                                                                                                                                                                              |
| GO:0004553 | hydrolase activity, hydrolyzing O-glycosyl compounds | 73 of 6765 in the list | 137 of 12752 in the genome | 1 | CCG004122.1,CCG028547.1,CCG015677.1,CCG027015.1,CCG018613.1,CCG023324.1,CCG004020.1,CCG001355.1,CCG016477.1,CCG014760.1,CCG012048.1,CCG019825.2,CCG001590.1,CCG025412.1,CCG015610.1,CCG023748.1,CCG023374.1,CCG004549.1,CCG020793.1,CCG010809.1,CCG006822.1,CCG023890.1,CCG022430.1,CCG004760.1,CCG016612.1,CCG002369.1,CCG015235.1,CCG010652.1,CCG010019.1,CCG017651.1,CCG028106.1,CCG023795.2,CCG009169.1,CCG022108.2,CCG010726.2,CCG028548.1,CCG025362.1,CCG013509.1,CCG002418.1,CCG002600.1,CCG020739.1,CCG012740.1,CCG021117.1,CCG022320.1,CCG008484.1,CCG023505.2,CCG019082.1,CCG010078.1,CCG006671.1,CCG026284.1,CCG025364.1,CCG025962.1,CCG008483.1,CCG007786.1,CCG027708.4,CCG010818.1,CCG010414.1,CCG016538.1,CCG011451.2,CCG001518.1,CCG024829.1,CCG025361.1,CCG021807.1,CCG019032.1,CCG009334.1,CCG016373.1,CCG002417.1,CCG023420.1,CCG007200.2,CCG011996.1,CCG002599.1,CCG025015.2,CCG017920.1 |
| GO:0003755 | peptidyl-prolyl cis-trans isomerase activity         | 13 of 6765 in the list | 24 of 12752 in the genome  | 1 | CCG021998.1,CCG015268.1,CCG015580.1,CCG000444.1,CCG007750.2,CCG012166.1,CCG015511.1,CCG017706.1,CCG021889.1,CCG011681.1,CCG006264.1,CCG003605.1,CCG009574.1                                                                                                                                                                                                                                                                                                                                                                                                                                                                                                                                                                                                                                                                                                                                                 |
| GO:0016859 | cis-trans isomerase activity                         | 13 of 6765 in the list | 24 of 12752 in the genome  | 1 | CCG021998.1,CCG015268.1,CCG015580.1,CCG000444.1,CCG007750.2,CCG012166.1,CCG015511.1,CCG017706.1,CCG021889.1,CCG011681.1,CCG006264.1,CCG003605.1,CCG009574.1                                                                                                                                                                                                                                                                                                                                                                                                                                                                                                                                                                                                                                                                                                                                                 |

|            |                                               |                        |                           |   |                                                                                                                                                                                                                                                                                                                                                                                                                                                                                                                                                                                                                                                 |
|------------|-----------------------------------------------|------------------------|---------------------------|---|-------------------------------------------------------------------------------------------------------------------------------------------------------------------------------------------------------------------------------------------------------------------------------------------------------------------------------------------------------------------------------------------------------------------------------------------------------------------------------------------------------------------------------------------------------------------------------------------------------------------------------------------------|
| GO:0050660 | flavin adenine dinucleotide binding           | 52 of 6765 in the list | 98 of 12752 in the genome | 1 | CCG002894.1,CCG018253.1,CCG018255.1,CCG025357.1,CCG010539.1,CCG012770.1,CCG023521.1,CCG008916.1,CCG014455.1,CCG000391.1,CCG022471.1,CCG011769.1,CCG020913.1,CCG004595.1,CCG018614.1,CCG012771.1,CCG020912.1,CCG020911.1,CCG013600.3,CCG010284.1,CCG018257.1,CCG013598.1,CCG015893.1,CCG020804.1,CCG008900.1,CCG002113.1,CCG019263.1,CCG009349.1,CCG015924.1,CCG019857.1,CCG017391.1,CCG010541.1,CCG010283.1,CCG007619.1,CCG002449.1,CCG004916.1,CCG000655.1,CCG004145.1,CCG015526.1,CCG015525.1,CCG014451.1,CCG012769.2,CCG003110.1,CCG014453.1,CCG022052.1,CCG008902.1,CCG027048.1,CCG009674.1,CCG000409.1,CCG025096.1,CCG011062.1,CCG020408.1 |
| GO:0003878 | ATP citrate synthase activity                 | 2 of 6765 in the list  | 3 of 12752 in the genome  | 1 | CCG003852.1,CCG021197.1                                                                                                                                                                                                                                                                                                                                                                                                                                                                                                                                                                                                                         |
| GO:0003922 | GMP synthase (glutamine-hydrolyzing) activity | 2 of 6765 in the list  | 3 of 12752 in the genome  | 1 | CCG006791.1,CCG018659.2                                                                                                                                                                                                                                                                                                                                                                                                                                                                                                                                                                                                                         |
| GO:0004017 | adenylate kinase activity                     | 2 of 6765 in the list  | 3 of 12752 in the genome  | 1 | CCG012374.1,CCG016683.1                                                                                                                                                                                                                                                                                                                                                                                                                                                                                                                                                                                                                         |
| GO:0004096 | catalase activity                             | 2 of 6765 in the list  | 3 of 12752 in the genome  | 1 | CCG021072.1,CCG021071.1                                                                                                                                                                                                                                                                                                                                                                                                                                                                                                                                                                                                                         |
| GO:0004148 | dihydrolipoyl dehydrogenase activity          | 2 of 6765 in the list  | 3 of 12752 in the genome  | 1 | CCG004595.1,CCG022471.1                                                                                                                                                                                                                                                                                                                                                                                                                                                                                                                                                                                                                         |
| GO:0004152 | dihydroorotate dehydrogenase activity         | 2 of 6765 in the list  | 3 of 12752 in the genome  | 1 | CCG013610.1,CCG016614.1                                                                                                                                                                                                                                                                                                                                                                                                                                                                                                                                                                                                                         |
| GO:0004573 | mannosyl-oligosaccharide glucosidase activity | 2 of 6765 in the list  | 3 of 12752 in the genome  | 1 | CCG011451.2,CCG022108.2                                                                                                                                                                                                                                                                                                                                                                                                                                                                                                                                                                                                                         |
| GO:0004618 | phosphoglycerate kinase activity              | 2 of 6765 in the list  | 3 of 12752 in the genome  | 1 | CCG020616.1,CCG007981.1                                                                                                                                                                                                                                                                                                                                                                                                                                                                                                                                                                                                                         |
| GO:0004634 | phosphopyruvate hydratase activity            | 2 of 6765 in the list  | 3 of 12752 in the genome  | 1 | CCG022453.1,CCG025277.1                                                                                                                                                                                                                                                                                                                                                                                                                                                                                                                                                                                                                         |
| GO:0004750 | ribulose-phosphate 3-epimerase                | 2 of 6765 in the list  | 3 of 12752 in the genome  | 1 | CCG018480.1,CCG002307.1                                                                                                                                                                                                                                                                                                                                                                                                                                                                                                                                                                                                                         |

|            |                                                                                              |                       |                          |   |                         |
|------------|----------------------------------------------------------------------------------------------|-----------------------|--------------------------|---|-------------------------|
| GO:0004774 | succinate-CoA ligase activity                                                                | 2 of 6765 in the list | 3 of 12752 in the genome | 1 | CCG003852.1,CCG021197.1 |
| GO:0004775 | succinate-CoA ligase (ADP-forming) activity                                                  | 2 of 6765 in the list | 3 of 12752 in the genome | 1 | CCG003852.1,CCG021197.1 |
| GO:0004889 | acetylcholine-activated cation-selective channel activity                                    | 2 of 6765 in the list | 3 of 12752 in the genome | 1 | CCG018801.1,CCG027498.1 |
| GO:0008255 | ecdysis-triggering hormone activity                                                          | 2 of 6765 in the list | 3 of 12752 in the genome | 1 | CCG022367.1,CCG017791.1 |
| GO:0008442 | 3-hydroxyisobutyrate dehydrogenase                                                           | 2 of 6765 in the list | 3 of 12752 in the genome | 1 | CCG025307.1,CCG009084.2 |
| GO:0016635 | oxidoreductase activity, acting on the CH-CH group of donors, quinone or related compound as | 2 of 6765 in the list | 3 of 12752 in the genome | 1 | CCG013610.1,CCG016614.1 |
| GO:0016812 | hydrolase activity, acting on carbon-nitrogen (but not peptide) bonds, in cyclic amides      | 2 of 6765 in the list | 3 of 12752 in the genome | 1 | CCG018108.1,CCG005938.1 |
| GO:0060590 | ATPase regulator activity                                                                    | 2 of 6765 in the list | 3 of 12752 in the genome | 1 | CCG026694.1,CCG003448.1 |

|            |                                                                                       |                        |                            |   |                                                                                                                                                                                                                                                                                                                                                                                                                                                                                                                                                                                                                                                                         |
|------------|---------------------------------------------------------------------------------------|------------------------|----------------------------|---|-------------------------------------------------------------------------------------------------------------------------------------------------------------------------------------------------------------------------------------------------------------------------------------------------------------------------------------------------------------------------------------------------------------------------------------------------------------------------------------------------------------------------------------------------------------------------------------------------------------------------------------------------------------------------|
| GO:0005102 | receptor binding                                                                      | 54 of 6765 in the list | 102 of 12752 in the genome | 1 | CCG020988.1,CCG017791.1,CCG016883.1,CCG012102.1,CCG003273.1,CCG018930.1,CCG013273.1,CCG000646.1,CCG003745.1,CCG027345.2,CCG008759.1,CCG007152.1,CCG012808.1,CCG004319.1,CCG002694.1,CCG017506.1,CCG004320.1,CCG003587.1,CCG002448.1,CCG010275.1,CCG003655.1,CCG014689.1,CCG013298.1,CCG022211.1,CCG024248.1,CCG022069.1,CCG006002.1,CCG003774.2,CCG007376.1,CCG022367.1,CCG015389.1,CCG008431.1,CCG022425.1,CCG019560.1,CCG013409.1,CCG015101.1,CCG014318.1,CCG028185.1,CCG024731.1,CCG017670.1,CCG000647.1,CCG007958.1,CCG018059.1,CCG027004.1,CCG026537.1,CCG023931.1,CCG000501.1,CCG004238.1,CCG023579.1,CCG007219.1,CCG017412.1,CCG005060.1,CCG007821.1,CCG008220.1 |
| GO:0015662 | ATPase activity, coupled to transmembrane movement of ions, phosphorylative mechanism | 15 of 6765 in the list | 28 of 12752 in the genome  | 1 | CCG004308.1,CCG000855.1,CCG017693.1,CCG003545.1,CCG026052.1,CCG023674.1,CCG026314.1,CCG009481.1,CCG004309.1,CCG016661.1,CCG019866.1,CCG007724.1,CCG017627.1,CCG021934.1,CCG019619.1                                                                                                                                                                                                                                                                                                                                                                                                                                                                                     |
| GO:0000049 | tRNA binding                                                                          | 3 of 6765 in the list  | 5 of 12752 in the genome   | 1 | CCG011419.1,CCG023315.1,CCG013727.1                                                                                                                                                                                                                                                                                                                                                                                                                                                                                                                                                                                                                                     |
| GO:0000981 | sequence-specific DNA binding RNA polymerase II transcription factor activity         | 3 of 6765 in the list  | 5 of 12752 in the genome   | 1 | CCG008741.1,CCG008742.1,CCG020586.1                                                                                                                                                                                                                                                                                                                                                                                                                                                                                                                                                                                                                                     |
| GO:0003951 | NAD+ kinase                                                                           | 3 of 6765 in the list  | 5 of 12752 in the genome   | 1 | CCG006456.1,CCG014835.1,CCG008314.1                                                                                                                                                                                                                                                                                                                                                                                                                                                                                                                                                                                                                                     |
| GO:0004371 | glycerone kinase activity                                                             | 3 of 6765 in the list  | 5 of 12752 in the genome   | 1 | CCG008317.1,CCG013318.1,CCG015587.1                                                                                                                                                                                                                                                                                                                                                                                                                                                                                                                                                                                                                                     |
| GO:0004825 | methionine-tRNA ligase activity                                                       | 3 of 6765 in the list  | 5 of 12752 in the genome   | 1 | CCG022269.1,CCG001876.1,CCG000414.1                                                                                                                                                                                                                                                                                                                                                                                                                                                                                                                                                                                                                                     |
| GO:0004826 | phenylalanine-tRNA ligase activity                                                    | 3 of 6765 in the list  | 5 of 12752 in the genome   | 1 | CCG007654.1,CCG024556.1,CCG000352.1                                                                                                                                                                                                                                                                                                                                                                                                                                                                                                                                                                                                                                     |

|            |                                                                                                |                        |                           |   |                                                                                                                                                                                                 |
|------------|------------------------------------------------------------------------------------------------|------------------------|---------------------------|---|-------------------------------------------------------------------------------------------------------------------------------------------------------------------------------------------------|
| GO:0004879 | ligand-activated sequence-specific DNA binding RNA polymerase II transcription factor activity | 3 of 6765 in the list  | 5 of 12752 in the genome  | 1 | CCG008741.1,CCG008742.1,CCG020586.1                                                                                                                                                             |
| GO:0005158 | insulin receptor binding                                                                       | 3 of 6765 in the list  | 5 of 12752 in the genome  | 1 | CCG014318.1,CCG023931.1,CCG003587.1                                                                                                                                                             |
| GO:0008443 | phosphofructokinase activity                                                                   | 3 of 6765 in the list  | 5 of 12752 in the genome  | 1 | CCG022214.1,CCG003215.3,CCG008287.1                                                                                                                                                             |
| GO:0016303 | 1-phosphatidylinositol-3-kinase activity                                                       | 3 of 6765 in the list  | 5 of 12752 in the genome  | 1 | CCG000789.1,CCG011658.1,CCG012959.1                                                                                                                                                             |
| GO:0016405 | CoA-ligase activity                                                                            | 3 of 6765 in the list  | 5 of 12752 in the genome  | 1 | CCG003852.1,CCG021197.1,CCG011310.1                                                                                                                                                             |
| GO:0016877 | ligase activity, forming carbon-sulfur bonds                                                   | 3 of 6765 in the list  | 5 of 12752 in the genome  | 1 | CCG003852.1,CCG021197.1,CCG011310.1                                                                                                                                                             |
| GO:0016878 | acid-thiol ligase activity                                                                     | 3 of 6765 in the list  | 5 of 12752 in the genome  | 1 | CCG003852.1,CCG021197.1,CCG011310.1                                                                                                                                                             |
| GO:0019201 | nucleotide kinase activity                                                                     | 3 of 6765 in the list  | 5 of 12752 in the genome  | 1 | CCG012374.1,CCG016683.1,CCG014116.1                                                                                                                                                             |
| GO:0043021 | ribonucleoprotein complex binding                                                              | 3 of 6765 in the list  | 5 of 12752 in the genome  | 1 | CCG026155.1,CCG023663.1,CCG007518.1                                                                                                                                                             |
| GO:0052742 | phosphatidylinositol kinase activity                                                           | 3 of 6765 in the list  | 5 of 12752 in the genome  | 1 | CCG000789.1,CCG011658.1,CCG012959.1                                                                                                                                                             |
| GO:0098531 | direct ligand regulated sequence-specific DNA binding transcription factor                     | 3 of 6765 in the list  | 5 of 12752 in the genome  | 1 | CCG008741.1,CCG008742.1,CCG020586.1                                                                                                                                                             |
| GO:0016811 | hydrolase activity, acting on carbon-nitrogen (but not peptide) bonds, in linear amides        | 16 of 6765 in the list | 30 of 12752 in the genome | 1 | CCG021085.1,CCG019506.1,CCG020799.1,CCG019470.1,CCG019509.1,CCG015907.1,CCG020863.1,CCG000472.1,CCG028235.1,CCG023779.1,CCG012788.3,CCG013028.1,CCG026030.1,CCG007652.2,CCG005029.1,CCG002836.1 |

|            |                                                             |                        |                           |   |                                                                                                                                                                                                 |
|------------|-------------------------------------------------------------|------------------------|---------------------------|---|-------------------------------------------------------------------------------------------------------------------------------------------------------------------------------------------------|
| GO:0019842 | vitamin binding                                             | 16 of 6765 in the list | 30 of 12752 in the genome | 1 | CCG009771.2,CCG009496.1,CCG017230.3,CCG023114.1,CCG025320.1,CCG026331.1,CCG009139.1,CCG019431.1,CCG001072.1,CCG004244.1,CCG015802.1,CCG020559.1,CCG008895.1,CCG002783.1,CCG021947.1,CCG020707.1 |
| GO:0004520 | endodeoxyribonuclease activity                              | 4 of 6765 in the list  | 7 of 12752 in the genome  | 1 | CCG004076.1,CCG000979.1,CCG007263.1,CCG016030.1                                                                                                                                                 |
| GO:0004591 | oxoglutarate dehydrogenase (succinyl-transferring) activity | 4 of 6765 in the list  | 7 of 12752 in the genome  | 1 | CCG009771.2,CCG004244.1,CCG020707.1,CCG001072.1                                                                                                                                                 |
| GO:0008603 | cAMP-dependent protein kinase regulator activity            | 4 of 6765 in the list  | 7 of 12752 in the genome  | 1 | CCG010238.1,CCG024695.1,CCG001249.1,CCG002324.1                                                                                                                                                 |
| GO:0004525 | ribonuclease III activity                                   | 5 of 6765 in the list  | 9 of 12752 in the genome  | 1 | CCG001040.1,CCG020685.1,CCG007043.1,CCG016127.1,CCG019674.1                                                                                                                                     |
| GO:0004536 | deoxyribonuclease activity                                  | 5 of 6765 in the list  | 9 of 12752 in the genome  | 1 | CCG004076.1,CCG000979.1,CCG007263.1,CCG016030.1,CCG017961.1                                                                                                                                     |
| GO:0004571 | mannosyl-oligosaccharide 1,2-alpha-mannosidase              | 5 of 6765 in the list  | 9 of 12752 in the genome  | 1 | CCG014760.1,CCG004549.1,CCG010726.2,CCG007786.1,CCG028106.1                                                                                                                                     |
| GO:0004714 | transmembrane receptor protein tyrosine kinase activity     | 5 of 6765 in the list  | 9 of 12752 in the genome  | 1 | CCG018494.1,CCG022929.1,CCG010631.1,CCG020978.1,CCG021354.1                                                                                                                                     |
| GO:0015924 | mannosyl-oligosaccharide mannosidase                        | 5 of 6765 in the list  | 9 of 12752 in the genome  | 1 | CCG014760.1,CCG004549.1,CCG010726.2,CCG007786.1,CCG028106.1                                                                                                                                     |
| GO:0016615 | malate dehydrogenase activity                               | 5 of 6765 in the list  | 9 of 12752 in the genome  | 1 | CCG018290.1,CCG019111.1,CCG013063.1,CCG019112.1,CCG018289.1                                                                                                                                     |

|            |                                                               |                        |                            |   |                                                                                                                                                                                                                                                                                                                                                                                                                                                                                                                                                                                                                                                                                                                                                                                                                                                                                                                                                                                                                         |
|------------|---------------------------------------------------------------|------------------------|----------------------------|---|-------------------------------------------------------------------------------------------------------------------------------------------------------------------------------------------------------------------------------------------------------------------------------------------------------------------------------------------------------------------------------------------------------------------------------------------------------------------------------------------------------------------------------------------------------------------------------------------------------------------------------------------------------------------------------------------------------------------------------------------------------------------------------------------------------------------------------------------------------------------------------------------------------------------------------------------------------------------------------------------------------------------------|
| GO:0004518 | nuclease activity                                             | 82 of 6765 in the list | 156 of 12752 in the genome | 1 | CCG027300.1,CCG004744.1,CCG003750.1,CCG005524.1,CCG004268.1,CCG023964.1,CCG021879.1,CCG016079.1,CCG027501.1,CCG020685.1,CCG023989.1,CCG007636.1,CCG012662.1,CCG001598.1,CCG023173.1,CCG019436.1,CCG004076.1,CCG007902.1,CCG006133.1,CCG004448.2,CCG000806.1,CCG007758.1,CCG001040.1,CCG018311.1,CCG000939.1,CCG004593.1,CCG005594.1,CCG007043.1,CCG000979.1,CCG020474.1,CCG005395.1,CCG008816.1,CCG025658.1,CCG021444.1,CCG013885.1,CCG010435.1,CCG005481.1,CCG011328.1,CCG012553.1,CCG012728.1,CCG016030.1,CCG024425.1,CCG019674.1,CCG001803.4,CCG020686.1,CCG018245.1,CCG023129.1,CCG006043.1,CCG021342.1,CCG014548.1,CCG020448.1,CCG004804.1,CCG019573.1,CCG018917.1,CCG003345.1,CCG020635.1,CCG007690.1,CCG013865.1,CCG024073.1,CCG011652.1,CCG001461.1,CCG004634.1,CCG023205.1,CCG002067.1,CCG001317.1,CCG004402.1,CCG017910.1,CCG012895.1,CCG004228.1,CCG000805.1,CCG016127.1,CCG028027.1,CCG023511.1,CCG003940.1,CCG009393.1,CCG013465.1,CCG000583.2,CCG022517.1,CCG007263.1,CCG004895.1,CCG026612.1,CCG017961.1 |
| GO:0016638 | oxidoreductase activity, acting on the CH-NH2 group of donors | 6 of 6765 in the list  | 11 of 12752 in the genome  | 1 | CCG018553.1,CCG028204.1,CCG021340.1,CCG026536.1,CCG016868.1,CCG019315.1                                                                                                                                                                                                                                                                                                                                                                                                                                                                                                                                                                                                                                                                                                                                                                                                                                                                                                                                                 |
| GO:0016868 | intramolecular transferase activity, phosphotransferas        | 6 of 6765 in the list  | 11 of 12752 in the genome  | 1 | CCG007023.1,CCG006203.1,CCG007771.1,CCG001501.1,CCG010373.1,CCG017797.1                                                                                                                                                                                                                                                                                                                                                                                                                                                                                                                                                                                                                                                                                                                                                                                                                                                                                                                                                 |

|            |                                                                           |                         |                            |   |                                                                                                                                                                                                                                                                                                                                                                                                                                                                                                                                                                                                                                                                                                                                                                                                                                                                                                                                                                                                                                                                                                                                                                                                                                                                                                                                                                                                                                                                                                                                                                                                                                                                                                                          |
|------------|---------------------------------------------------------------------------|-------------------------|----------------------------|---|--------------------------------------------------------------------------------------------------------------------------------------------------------------------------------------------------------------------------------------------------------------------------------------------------------------------------------------------------------------------------------------------------------------------------------------------------------------------------------------------------------------------------------------------------------------------------------------------------------------------------------------------------------------------------------------------------------------------------------------------------------------------------------------------------------------------------------------------------------------------------------------------------------------------------------------------------------------------------------------------------------------------------------------------------------------------------------------------------------------------------------------------------------------------------------------------------------------------------------------------------------------------------------------------------------------------------------------------------------------------------------------------------------------------------------------------------------------------------------------------------------------------------------------------------------------------------------------------------------------------------------------------------------------------------------------------------------------------------|
| GO:0016772 | transferase activity,<br>transferring<br>phosphorus-<br>containing groups | 414 of 6765 in the list | 785 of 12752 in the genome | 1 | CCG016649.1,CCG023297.1,CCG027737.1,CCG004887.1,CCG007046.2,CCG001057.1,CCG016952.1,CCG014419.1,CCG018507.1,CCG010985.1,CCG026174.1,CCG024745.1,CCG004468.1,CCG009653.1,CCG000970.1,CCG014680.1,CCG002470.1,CCG028505.1,CCG012558.1,CCG028407.1,CCG004398.1,CCG017266.1,CCG028198.1,CCG016689.2,CCG021479.1,CCG012213.2,CCG023381.1,CCG019735.1,CCG015296.1,CCG016094.1,CCG013353.1,CCG004225.1,CCG012623.1,CCG013089.1,CCG008381.1,CCG021616.1,CCG002047.2,CCG004515.1,CCG004050.1,CCG013402.1,CCG027115.1,CCG017473.1,CCG021110.1,CCG017984.1,CCG019378.3,CCG027636.1,CCG004569.1,CCG024139.1,CCG005276.1,CCG021295.1,CCG008040.1,CCG009002.1,CCG011949.1,CCG013345.1,CCG006465.1,CCG006767.1,CCG006042.2,CCG019296.1,CCG013065.1,CCG003248.1,CCG014840.1,CCG015694.1,CCG011322.1,CCG023172.1,CCG013865.1,CCG018494.1,CCG006484.1,CCG010378.2,CCG027114.1,CCG001311.1,CCG023251.1,CCG019493.1,CCG007457.1,CCG021938.1,CCG023468.1,CCG023331.1,CCG012332.1,CCG009119.1,CCG015350.1,CCG025459.1,CCG025715.1,CCG009687.2,CCG017127.1,CCG008663.1,CCG002957.1,CCG013318.1,CCG021948.1,CCG011148.1,CCG011587.1,CCG022214.1,CCG014116.1,CCG017111.1,CCG021137.1,CCG009375.1,CCG015186.1,CCG017701.1,CCG009518.1,CCG016327.2,CCG006456.1,CCG024200.1,CCG023125.1,CCG016381.1,CCG011727.1,CCG004903.1,CCG028426.1,CCG023458.1,CCG023058.2,CCG017001.1,CCG027943.1,CCG017113.1,CCG011886.1,CCG026612.1,CCG016095.1,CCG003520.1,CCG004926.1,CCG006928.1,CCG016738.2,CCG000789.1,CCG025433.1,CCG003554.1,CCG005524.1,CCG021759.1,CCG020978.1,CCG024784.1,CCG007155.1,CCG008404.1,CCG018201.1,CCG006529.1,CCG022628.1,CCG005501.1,CCG008287.1,CCG021179.1,CCG001108.1,CCG007533.1,CCG004534.1,CCG004123.1,CCG004224.1,CCG005531.1, |
| GO:0004112 | cyclic-nucleotide<br>phosphodiesterase<br>activity                        | 8 of 6765 in the list   | 15 of 12752 in the genome  | 1 | CCG010628.1,CCG017798.1,CCG013139.1,CCG006013.1,CCG002520.1,CCG001759.1,CCG011074.1,CCG025932.1                                                                                                                                                                                                                                                                                                                                                                                                                                                                                                                                                                                                                                                                                                                                                                                                                                                                                                                                                                                                                                                                                                                                                                                                                                                                                                                                                                                                                                                                                                                                                                                                                          |
| GO:0004114 | 3',5'-cyclic-<br>nucleotide<br>phosphodiesterase                          | 8 of 6765 in the list   | 15 of 12752 in the genome  | 1 | CCG010628.1,CCG017798.1,CCG013139.1,CCG006013.1,CCG002520.1,CCG001759.1,CCG011074.1,CCG025932.1                                                                                                                                                                                                                                                                                                                                                                                                                                                                                                                                                                                                                                                                                                                                                                                                                                                                                                                                                                                                                                                                                                                                                                                                                                                                                                                                                                                                                                                                                                                                                                                                                          |

|            |                         |                         |                            |   |                                                                                                                                                                                                                                                                                                                                                                                                                                                                                                                                                                                                                                                                                                                                                                                                                                                                                                                                                                                                                                                                                                                                                                                                                                                                                                                                                                                                                                                                                                                                                                                                           |
|------------|-------------------------|-------------------------|----------------------------|---|-----------------------------------------------------------------------------------------------------------------------------------------------------------------------------------------------------------------------------------------------------------------------------------------------------------------------------------------------------------------------------------------------------------------------------------------------------------------------------------------------------------------------------------------------------------------------------------------------------------------------------------------------------------------------------------------------------------------------------------------------------------------------------------------------------------------------------------------------------------------------------------------------------------------------------------------------------------------------------------------------------------------------------------------------------------------------------------------------------------------------------------------------------------------------------------------------------------------------------------------------------------------------------------------------------------------------------------------------------------------------------------------------------------------------------------------------------------------------------------------------------------------------------------------------------------------------------------------------------------|
| GO:0032403 | protein complex binding | 8 of 6765 in the list   | 15 of 12752 in the genome  | 1 | CCG018632.1,CCG027348.1,CCG023931.1,CCG000575.1,CCG003587.1,CCG014318.1,CCG012169.1,CCG011262.1                                                                                                                                                                                                                                                                                                                                                                                                                                                                                                                                                                                                                                                                                                                                                                                                                                                                                                                                                                                                                                                                                                                                                                                                                                                                                                                                                                                                                                                                                                           |
| GO:0048037 | cofactor binding        | 131 of 6765 in the list | 250 of 12752 in the genome | 1 | CCG009860.1,CCG002894.1,CCG025698.1,CCG020099.1,CCG028623.1,CCG022471.1,CCG020913.1,CCG004595.1,CCG013009.1,CCG021239.1,CCG024450.1,CCG009685.1,CCG010284.1,CCG022868.1,CCG013059.1,CCG025836.1,CCG020804.1,CCG004547.1,CCG026536.1,CCG014515.1,CCG007619.1,CCG022025.2,CCG025833.1,CCG004145.1,CCG000944.1,CCG018575.1,CCG014451.1,CCG015278.1,CCG001553.1,CCG020661.1,CCG018253.1,CCG018255.1,CCG005192.1,CCG028131.1,CCG013026.1,CCG016480.1,CCG018290.1,CCG020911.1,CCG014316.1,CCG013600.3,CCG006720.1,CCG004495.1,CCG028581.1,CCG018257.1,CCG013598.1,CCG015893.1,CCG016315.1,CCG020368.1,CCG002113.1,CCG014148.1,CCG009662.1,CCG015924.1,CCG003683.2,CCG001163.1,CCG000070.1,CCG010283.1,CCG018423.1,CCG025636.2,CCG022056.1,CCG008902.1,CCG001072.1,CCG000409.1,CCG025096.1,CCG000835.1,CCG015567.1,CCG025357.1,CCG012770.1,CCG027413.1,CCG012619.1,CCG005955.1,CCG000391.1,CCG013575.1,CCG012771.1,CCG020912.1,CCG019112.1,CCG020015.2,CCG015568.1,CCG019111.1,CCG008900.1,CCG019263.1,CCG009349.1,CCG008776.1,CCG022869.1,CCG004244.1,CCG019258.1,CCG015780.1,CCG002449.1,CCG018615.3,CCG006998.1,CCG015526.1,CCG012769.2,CCG022052.1,CCG027048.1,CCG013044.1,CCG009674.1,CCG027631.1,CCG020707.1,CCG011063.1,CCG024798.1,CCG010539.1,CCG008237.1,CCG009753.1,CCG023521.1,CCG008916.1,CCG014455.1,CCG004016.1,CCG011769.1,CCG018640.1,CCG018614.1,CCG008931.1,CCG018289.1,CCG022027.1,CCG023396.1,CCG012843.1,CCG019857.1,CCG010522.1,CCG017391.1,CCG010541.1,CCG011605.1,CCG000655.1,CCG004916.1,CCG009771.2,CCG015276.2,CCG015525.1,CCG027545.1,CCG003110.1,CCG014453.1,CCG004015.1,CCG019239 |

|            |                                            |                        |                            |   |                                                                                                                                                                                                                                                                                                                                                                                                                                                                                                                                                                                                                                                                                                                                                                                                                                                                                                                                                                                                                                                                                                                                                                                                                                     |
|------------|--------------------------------------------|------------------------|----------------------------|---|-------------------------------------------------------------------------------------------------------------------------------------------------------------------------------------------------------------------------------------------------------------------------------------------------------------------------------------------------------------------------------------------------------------------------------------------------------------------------------------------------------------------------------------------------------------------------------------------------------------------------------------------------------------------------------------------------------------------------------------------------------------------------------------------------------------------------------------------------------------------------------------------------------------------------------------------------------------------------------------------------------------------------------------------------------------------------------------------------------------------------------------------------------------------------------------------------------------------------------------|
| GO:0008289 | lipid binding                              | 85 of 6765 in the list | 163 of 12752 in the genome | 1 | CCG009701.1,CCG009512.1,CCG005040.1,CCG008741.1,CCG027955.1,CCG007732.3,CCG010849.1,CCG003602.1,CCG018015.1,CCG021483.1,CCG017266.1,CCG019462.1,CCG012694.1,CCG016878.1,CCG010807.5,CCG008035.1,CCG015793.1,CCG006804.1,CCG013329.1,CCG023358.1,CCG011172.1,CCG011141.1,CCG011658.1,CCG019585.1,CCG005988.1,CCG013869.1,CCG024032.1,CCG010270.1,CCG012959.1,CCG022420.1,CCG009510.1,CCG010260.1,CCG025903.1,CCG011422.1,CCG024595.1,CCG024840.1,CCG006050.2,CCG008742.1,CCG004132.1,CCG009980.1,CCG014647.1,CCG025470.1,CCG008892.2,CCG009798.1,CCG007702.1,CCG027355.1,CCG013408.2,CCG023527.1,CCG006489.1,CCG022749.1,CCG017498.1,CCG006692.2,CCG023464.1,CCG001579.1,CCG028136.1,CCG011437.1,CCG004169.1,CCG013825.1,CCG022394.1,CCG010882.2,CCG011183.1,CCG016407.1,CCG009226.1,CCG023336.1,CCG000596.1,CCG010279.1,CCG007676.1,CCG025554.1,CCG026397.1,CCG027765.1,CCG018888.1,CCG006361.2,CCG006780.1,CCG006463.1,CCG010197.1,CCG008652.1,CCG018630.1,CCG005366.1,CCG000515.1,CCG027309.1,CCG026971.1,CCG021294.1,CCG003386.1,CCG024798.1,CCG022869.1,CCG022025.2,CCG018640.1,CCG022056.1,CCG016480.1,CCG008931.1,CCG013044.1,CCG018289.1,CCG019112.1,CCG018290.1,CCG009685.1,CCG019111.1,CCG028581.1,CCG027631.1,CCG000835.1 |
| GO:0051287 | NAD binding                                | 16 of 6765 in the list | 31 of 12752 in the genome  | 1 | CCG024798.1,CCG022869.1,CCG022025.2,CCG018640.1,CCG022056.1,CCG016480.1,CCG008931.1,CCG013044.1,CCG018289.1,CCG019112.1,CCG018290.1,CCG009685.1,CCG019111.1,CCG028581.1,CCG027631.1,CCG000835.1                                                                                                                                                                                                                                                                                                                                                                                                                                                                                                                                                                                                                                                                                                                                                                                                                                                                                                                                                                                                                                     |
| GO:0005326 | neurotransmitter transporter activity      | 17 of 6765 in the list | 33 of 12752 in the genome  | 1 | CCG005140.1,CCG012096.1,CCG010710.1,CCG026799.1,CCG023060.1,CCG010711.1,CCG023980.1,CCG027718.1,CCG016128.1,CCG026151.1,CCG028141.1,CCG016245.1,CCG009022.2,CCG017641.1,CCG022789.1,CCG017552.1,CCG025323.1                                                                                                                                                                                                                                                                                                                                                                                                                                                                                                                                                                                                                                                                                                                                                                                                                                                                                                                                                                                                                         |
| GO:0005328 | neurotransmitter:sodium symporter activity | 17 of 6765 in the list | 33 of 12752 in the genome  | 1 | CCG005140.1,CCG012096.1,CCG010710.1,CCG026799.1,CCG023060.1,CCG010711.1,CCG023980.1,CCG027718.1,CCG016128.1,CCG026151.1,CCG028141.1,CCG016245.1,CCG009022.2,CCG017641.1,CCG022789.1,CCG017552.1,CCG025323.1                                                                                                                                                                                                                                                                                                                                                                                                                                                                                                                                                                                                                                                                                                                                                                                                                                                                                                                                                                                                                         |

|            |                                                                        |                        |                            |   |                                                                                                                                                                                                                                                                                                                                                                                                                                                                                                                                                                                                                                                                                                                                                                                                                                                                                                                                                                                                                                                                                                                                                 |
|------------|------------------------------------------------------------------------|------------------------|----------------------------|---|-------------------------------------------------------------------------------------------------------------------------------------------------------------------------------------------------------------------------------------------------------------------------------------------------------------------------------------------------------------------------------------------------------------------------------------------------------------------------------------------------------------------------------------------------------------------------------------------------------------------------------------------------------------------------------------------------------------------------------------------------------------------------------------------------------------------------------------------------------------------------------------------------------------------------------------------------------------------------------------------------------------------------------------------------------------------------------------------------------------------------------------------------|
| GO:0050662 | coenzyme binding                                                       | 92 of 6765 in the list | 177 of 12752 in the genome | 1 | CCG002894.1,CCG025698.1,CCG025357.1,CCG012770.1,CCG005955.1,CCG000391.1,CCG022471.1,CCG020913.1,CCG004595.1,CCG013009.1,CCG012771.1,CCG021239.1,CCG019112.1,CCG020912.1,CCG009685.1,CCG020015.2,CCG010284.1,CCG019111.1,CCG022868.1,CCG020804.1,CCG008900.1,CCG019263.1,CCG026536.1,CCG014515.1,CCG009349.1,CCG022869.1,CCG004244.1,CCG015780.1,CCG007619.1,CCG002449.1,CCG022025.2,CCG006998.1,CCG004145.1,CCG015526.1,CCG014451.1,CCG012769.2,CCG022052.1,CCG027048.1,CCG013044.1,CCG009674.1,CCG027631.1,CCG020707.1,CCG011063.1,CCG024798.1,CCG018253.1,CCG018255.1,CCG010539.1,CCG009753.1,CCG023521.1,CCG008916.1,CCG014455.1,CCG011769.1,CCG018640.1,CCG028131.1,CCG018614.1,CCG016480.1,CCG008931.1,CCG018289.1,CCG018290.1,CCG020911.1,CCG014316.1,CCG013600.3,CCG006720.1,CCG028581.1,CCG018257.1,CCG013598.1,CCG015893.1,CCG022027.1,CCG002113.1,CCG014148.1,CCG015924.1,CCG019857.1,CCG017391.1,CCG010522.1,CCG010541.1,CCG011605.1,CCG000070.1,CCG010283.1,CCG018423.1,CCG004916.1,CCG000655.1,CCG022056.1,CCG009771.2,CCG015525.1,CCG014453.1,CCG003110.1,CCG008902.1,CCG001072.1,CCG000409.1,CCG025096.1,CCG000835.1,CCG020408.1 |
| GO:0004180 | carboxypeptidase activity                                              | 25 of 6765 in the list | 49 of 12752 in the genome  | 1 | CCG003407.1,CCG016075.1,CCG023196.1,CCG005125.1,CCG002386.1,CCG007467.1,CCG002383.1,CCG001168.1,CCG012666.1,CCG014935.1,CCG028016.1,CCG005323.1,CCG016073.1,CCG011860.1,CCG023502.1,CCG024082.1,CCG003408.1,CCG019741.1,CCG014035.1,CCG022701.1,CCG019742.1,CCG008715.1,CCG016072.1,                                                                                                                                                                                                                                                                                                                                                                                                                                                                                                                                                                                                                                                                                                                                                                                                                                                            |
| GO:0016903 | oxidoreductase activity, acting on the aldehyde or oxo group of donors | 25 of 6765 in the list | 49 of 12752 in the genome  | 1 | CCG022181.1,CCG015450.1,CCG018913.1,CCG010038.1,CCG017170.1,CCG001255.2,CCG005162.1,CCG004244.1,CCG025346.1,CCG025494.1,CCG013417.1,CCG005163.1,CCG009771.2,CCG021540.1,CCG018921.1,CCG011175.1,CCG023451.1,CCG024565.2,CCG001072.1,CCG012915.1,CCG019334.1,CCG010039.1,CCG018922.1,                                                                                                                                                                                                                                                                                                                                                                                                                                                                                                                                                                                                                                                                                                                                                                                                                                                            |

|            |                                                                       |                        |                            |   |                                                                                                                                                                                                                                                                                                                                                                                                                                                                                                                                                                                                                                                                                                                                                                                                                                                                                                                                                                                                             |
|------------|-----------------------------------------------------------------------|------------------------|----------------------------|---|-------------------------------------------------------------------------------------------------------------------------------------------------------------------------------------------------------------------------------------------------------------------------------------------------------------------------------------------------------------------------------------------------------------------------------------------------------------------------------------------------------------------------------------------------------------------------------------------------------------------------------------------------------------------------------------------------------------------------------------------------------------------------------------------------------------------------------------------------------------------------------------------------------------------------------------------------------------------------------------------------------------|
| GO:0016879 | ligase activity,<br>forming carbon-<br>nitrogen bonds                 | 81 of 6765 in the list | 157 of 12752 in the genome | 1 | CCG003060.1,CCG011220.1,CCG010174.2,CCG017522.1,CCG014351.1,CCG027737.1,CCG009151.1,CCG011491.1,CCG009333.1,CCG022370.1,CCG025493.1,CCG006505.1,CCG017097.1,CCG020078.1,CCG002515.1,CCG026590.1,CCG020441.1,CCG019139.1,CCG019482.1,CCG011837.1,CCG010561.1,CCG007600.1,CCG015294.1,CCG012077.1,CCG020230.3,CCG007254.1,CCG027495.1,CCG023429.1,CCG001635.1,CCG025731.1,CCG026099.1,CCG013913.1,CCG024133.1,CCG014322.1,CCG018268.1,CCG004257.1,CCG013505.1,CCG017330.1,CCG027270.1,CCG025897.1,CCG008808.1,CCG011474.1,CCG024872.1,CCG015315.1,CCG013109.1,CCG011071.1,CCG011192.2,CCG021760.1,CCG012408.1,CCG010187.2,CCG020873.1,CCG004388.1,CCG001925.1,CCG017967.1,CCG016189.1,CCG027008.1,CCG020757.1,CCG004333.1,CCG002368.1,CCG019549.1,CCG015864.1,CCG007809.1,CCG006821.1,CCG000682.1,CCG002897.1,CCG004263.1,CCG006341.1,CCG023677.2,CCG023452.1,CCG028181.1,CCG020203.1,CCG018659.2,CCG003532.1,CCG022773.2,CCG014219.1,CCG008557.1,CCG028305.1,CCG015943.1,CCG006791.1,CCG021851.3,CCG009982.1 |
| GO:0005262 | calcium channel<br>activity                                           | 8 of 6765 in the list  | 16 of 12752 in the genome  | 1 | CCG025568.1,CCG005277.1,CCG026796.1,CCG027585.1,CCG014448.1,CCG009808.1,CCG020400.2,CCG011706.1                                                                                                                                                                                                                                                                                                                                                                                                                                                                                                                                                                                                                                                                                                                                                                                                                                                                                                             |
| GO:0015085 | calcium ion<br>transmembrane<br>transporter activity                  | 8 of 6765 in the list  | 16 of 12752 in the genome  | 1 | CCG025568.1,CCG005277.1,CCG026796.1,CCG027585.1,CCG014448.1,CCG009808.1,CCG020400.2,CCG011706.1                                                                                                                                                                                                                                                                                                                                                                                                                                                                                                                                                                                                                                                                                                                                                                                                                                                                                                             |
| GO:0019199 | transmembrane<br>receptor protein<br>kinase activity                  | 8 of 6765 in the list  | 16 of 12752 in the genome  | 1 | CCG018494.1,CCG010631.1,CCG020326.1,CCG020978.1,CCG022929.1,CCG017773.1,CCG024790.1,CCG021354.1                                                                                                                                                                                                                                                                                                                                                                                                                                                                                                                                                                                                                                                                                                                                                                                                                                                                                                             |
| GO:0019239 | deaminase activity                                                    | 8 of 6765 in the list  | 16 of 12752 in the genome  | 1 | CCG025948.4,CCG015746.1,CCG026865.1,CCG022273.1,CCG027962.1,CCG015747.1,CCG017295.1,CCG020504.1                                                                                                                                                                                                                                                                                                                                                                                                                                                                                                                                                                                                                                                                                                                                                                                                                                                                                                             |
| GO:0072509 | divalent inorganic<br>cation<br>transmembrane<br>transporter activity | 8 of 6765 in the list  | 16 of 12752 in the genome  | 1 | CCG025568.1,CCG005277.1,CCG026796.1,CCG027585.1,CCG014448.1,CCG009808.1,CCG020400.2,CCG011706.1                                                                                                                                                                                                                                                                                                                                                                                                                                                                                                                                                                                                                                                                                                                                                                                                                                                                                                             |
| GO:0008378 | galactosyltransferase<br>activity                                     | 7 of 6765 in the list  | 14 of 12752 in the genome  | 1 | CCG014579.1,CCG003880.1,CCG012268.1,CCG009494.1,CCG021053.1,CCG027131.1,CCG010700.1                                                                                                                                                                                                                                                                                                                                                                                                                                                                                                                                                                                                                                                                                                                                                                                                                                                                                                                         |

|            |                                                   |                        |                            |   |                                                                                                                                                                                                                                                                                                                                                                                                                                                                                                                                                                                                                                                                                                                                                                                     |
|------------|---------------------------------------------------|------------------------|----------------------------|---|-------------------------------------------------------------------------------------------------------------------------------------------------------------------------------------------------------------------------------------------------------------------------------------------------------------------------------------------------------------------------------------------------------------------------------------------------------------------------------------------------------------------------------------------------------------------------------------------------------------------------------------------------------------------------------------------------------------------------------------------------------------------------------------|
| GO:0016758 | transferase activity, transferring hexosyl groups | 63 of 6765 in the list | 123 of 12752 in the genome | 1 | CCG017559.1,CCG019369.1,CCG017381.1,CCG015146.1,CCG019892.1,CCG021819.1,CCG018536.1,CCG011999.1,CCG002316.1,CCG013390.1,CCG023617.1,CCG000389.2,CCG007885.1,CCG020944.1,CCG019298.1,CCG011023.1,CCG012268.1,CCG006010.1,CCG007766.1,CCG018377.1,CCG016003.1,CCG009928.1,CCG008130.1,CCG021053.1,CCG028549.1,CCG027416.1,CCG028144.2,CCG004091.1,CCG000388.1,CCG011531.1,CCG009494.1,CCG015843.1,CCG025472.1,CCG003247.1,CCG004529.1,CCG014304.1,CCG011966.1,CCG003880.1,CCG027131.1,CCG001219.2,CCG014839.1,CCG017197.1,CCG012199.1,CCG013985.1,CCG014579.1,CCG006213.1,CCG001180.1,CCG012437.1,CCG003726.1,CCG007987.1,CCG017389.1,CCG023725.1,CCG006221.1,CCG010360.1,CCG007948.1,CCG023883.1,CCG002930.1,CCG000360.1,CCG025840.1,CCG010280.1,CCG010700.1,CCG003251.1,CCG023885.1 |
| GO:0003746 | translation elongation factor                     | 6 of 6765 in the list  | 12 of 12752 in the genome  | 1 | CCG005143.1,CCG026155.1,CCG003684.1,CCG000994.1,CCG027751.1,CCG016511.1                                                                                                                                                                                                                                                                                                                                                                                                                                                                                                                                                                                                                                                                                                             |
| GO:0004143 | diacylglycerol kinase activity                    | 6 of 6765 in the list  | 12 of 12752 in the genome  | 1 | CCG008185.1,CCG014837.1,CCG019493.1,CCG017701.1,CCG015807.1,CCG016608.2                                                                                                                                                                                                                                                                                                                                                                                                                                                                                                                                                                                                                                                                                                             |
| GO:0008194 | UDP-glycosyltransferase activity                  | 12 of 6765 in the list | 24 of 12752 in the genome  | 1 | CCG017559.1,CCG007987.1,CCG028549.1,CCG001219.2,CCG017197.1,CCG014839.1,CCG011531.1,CCG001180.1,CCG016003.1,CCG000360.1,CCG025840.1,CCG008130.1                                                                                                                                                                                                                                                                                                                                                                                                                                                                                                                                                                                                                                     |
| GO:0008158 | hedgehog receptor activity                        | 5 of 6765 in the list  | 10 of 12752 in the genome  | 1 | CCG002034.1,CCG016857.1,CCG000345.1,CCG010505.1,CCG017062.1                                                                                                                                                                                                                                                                                                                                                                                                                                                                                                                                                                                                                                                                                                                         |
| GO:0019200 | carbohydrate kinase activity                      | 5 of 6765 in the list  | 10 of 12752 in the genome  | 1 | CCG010996.1,CCG022214.1,CCG003215.3,CCG003220.2,CCG008287.1                                                                                                                                                                                                                                                                                                                                                                                                                                                                                                                                                                                                                                                                                                                         |
| GO:0031625 | ubiquitin protein ligase binding                  | 5 of 6765 in the list  | 10 of 12752 in the genome  | 1 | CCG019571.1,CCG019599.1,CCG001101.1,CCG019394.1,CCG004134.1                                                                                                                                                                                                                                                                                                                                                                                                                                                                                                                                                                                                                                                                                                                         |
| GO:0044389 | small conjugating protein ligase                  | 5 of 6765 in the list  | 10 of 12752 in the genome  | 1 | CCG019571.1,CCG019599.1,CCG001101.1,CCG019394.1,CCG004134.1                                                                                                                                                                                                                                                                                                                                                                                                                                                                                                                                                                                                                                                                                                                         |
| GO:0003997 | acyl-CoA oxidase activity                         | 4 of 6765 in the list  | 8 of 12752 in the genome   | 1 | CCG025521.1,CCG018851.1,CCG006391.1,CCG000591.1                                                                                                                                                                                                                                                                                                                                                                                                                                                                                                                                                                                                                                                                                                                                     |
| GO:0005391 | sodium:potassium-exchanging ATPase activity       | 4 of 6765 in the list  | 8 of 12752 in the genome   | 1 | CCG004308.1,CCG026314.1,CCG004309.1,CCG017693.1                                                                                                                                                                                                                                                                                                                                                                                                                                                                                                                                                                                                                                                                                                                                     |
| GO:0008312 | 7S RNA binding                                    | 4 of 6765 in the list  | 8 of 12752 in the genome   | 1 | CCG006714.1,CCG018217.1,CCG000614.1,CCG020806.1                                                                                                                                                                                                                                                                                                                                                                                                                                                                                                                                                                                                                                                                                                                                     |

|            |                                                    |                        |                           |   |                                                                                                                                                                                                             |
|------------|----------------------------------------------------|------------------------|---------------------------|---|-------------------------------------------------------------------------------------------------------------------------------------------------------------------------------------------------------------|
| GO:0008556 | potassium-transporting ATPase activity             | 4 of 6765 in the list  | 8 of 12752 in the genome  | 1 | CCG004308.1,CCG026314.1,CCG004309.1,CCG017693.1                                                                                                                                                             |
| GO:0030976 | thiamine pyrophosphate binding                     | 4 of 6765 in the list  | 8 of 12752 in the genome  | 1 | CCG009771.2,CCG004244.1,CCG020707.1,CCG001072.1                                                                                                                                                             |
| GO:0051087 | chaperone binding                                  | 4 of 6765 in the list  | 8 of 12752 in the genome  | 1 | CCG026694.1,CCG003448.1,CCG020417.1,CCG001114.1                                                                                                                                                             |
| GO:0016831 | carboxy-lyase activity                             | 17 of 6765 in the list | 34 of 12752 in the genome | 1 | CCG004532.1,CCG012843.1,CCG009662.1,CCG028524.1,CCG008776.1,CCG017175.1,CCG012308.1,CCG028623.1,CCG012619.1,CCG012840.1,CCG017278.1,CCG025940.1,CCG015411.1,CCG009764.1,CCG001553.1,CCG005923.1,CCG006896.1 |
| GO:0000179 | rRNA (adenine-N6,N6-)-dimethyltransferase activity | 3 of 6765 in the list  | 6 of 12752 in the genome  | 1 | CCG019953.1,CCG016274.1,CCG005097.1                                                                                                                                                                         |
| GO:0001871 | pattern binding                                    | 3 of 6765 in the list  | 6 of 12752 in the genome  | 1 | CCG021167.1,CCG001011.2,CCG027393.1                                                                                                                                                                         |
| GO:0004435 | phosphatidylinositol phospholipase C activity      | 3 of 6765 in the list  | 6 of 12752 in the genome  | 1 | CCG025387.1,CCG026695.1,CCG014647.1                                                                                                                                                                         |
| GO:0004448 | isocitrate dehydrogenase activity                  | 3 of 6765 in the list  | 6 of 12752 in the genome  | 1 | CCG022869.1,CCG024798.1,CCG027631.1                                                                                                                                                                         |
| GO:0004611 | phosphoenolpyruvate carboxykinase                  | 3 of 6765 in the list  | 6 of 12752 in the genome  | 1 | CCG012840.1,CCG017278.1,CCG028524.1                                                                                                                                                                         |
| GO:0004613 | phosphoenolpyruvate carboxykinase (GTP) activity   | 3 of 6765 in the list  | 6 of 12752 in the genome  | 1 | CCG012840.1,CCG017278.1,CCG028524.1                                                                                                                                                                         |
| GO:0008017 | microtubule binding                                | 3 of 6765 in the list  | 6 of 12752 in the genome  | 1 | CCG018632.1,CCG012169.1,CCG011262.1                                                                                                                                                                         |
| GO:0008649 | rRNA methyltransferase activity                    | 3 of 6765 in the list  | 6 of 12752 in the genome  | 1 | CCG019953.1,CCG016274.1,CCG005097.1                                                                                                                                                                         |
| GO:0015631 | tubulin binding                                    | 3 of 6765 in the list  | 6 of 12752 in the genome  | 1 | CCG018632.1,CCG012169.1,CCG011262.1                                                                                                                                                                         |
| GO:0016433 | rRNA (adenine) methyltransferase activity          | 3 of 6765 in the list  | 6 of 12752 in the genome  | 1 | CCG019953.1,CCG016274.1,CCG005097.1                                                                                                                                                                         |

|            |                                                                             |                        |                            |   |                                                                                                                                                                                                                                                                                                                                                                                                                                                                                                                                                                                                                                                                                                                                                                                                                                                                                                 |
|------------|-----------------------------------------------------------------------------|------------------------|----------------------------|---|-------------------------------------------------------------------------------------------------------------------------------------------------------------------------------------------------------------------------------------------------------------------------------------------------------------------------------------------------------------------------------------------------------------------------------------------------------------------------------------------------------------------------------------------------------------------------------------------------------------------------------------------------------------------------------------------------------------------------------------------------------------------------------------------------------------------------------------------------------------------------------------------------|
| GO:0017016 | Ras GTPase                                                                  | 3 of 6765 in the list  | 6 of 12752 in the genome   | 1 | CCG000469.1,CCG018647.1,CCG018646.1                                                                                                                                                                                                                                                                                                                                                                                                                                                                                                                                                                                                                                                                                                                                                                                                                                                             |
| GO:0030247 | polysaccharide binding                                                      | 3 of 6765 in the list  | 6 of 12752 in the genome   | 1 | CCG021167.1,CCG001011.2,CCG027393.1                                                                                                                                                                                                                                                                                                                                                                                                                                                                                                                                                                                                                                                                                                                                                                                                                                                             |
| GO:0030674 | protein binding, bridging                                                   | 3 of 6765 in the list  | 6 of 12752 in the genome   | 1 | CCG018859.3,CCG017033.1,CCG015583.1                                                                                                                                                                                                                                                                                                                                                                                                                                                                                                                                                                                                                                                                                                                                                                                                                                                             |
| GO:0031267 | small GTPase binding                                                        | 3 of 6765 in the list  | 6 of 12752 in the genome   | 1 | CCG000469.1,CCG018647.1,CCG018646.1                                                                                                                                                                                                                                                                                                                                                                                                                                                                                                                                                                                                                                                                                                                                                                                                                                                             |
| GO:0060090 | binding, bridging                                                           | 3 of 6765 in the list  | 6 of 12752 in the genome   | 1 | CCG018859.3,CCG017033.1,CCG015583.1                                                                                                                                                                                                                                                                                                                                                                                                                                                                                                                                                                                                                                                                                                                                                                                                                                                             |
| GO:0016747 | transferase activity, transferring acyl groups other than amino-acyl groups | 72 of 6765 in the list | 141 of 12752 in the genome | 1 | CCG026016.1,CCG008829.1,CCG008842.1,CCG005392.1,CCG022854.1,CCG023678.1,CCG000184.1,CCG026015.1,CCG023345.1,CCG021738.1,CCG013575.1,CCG022255.1,CCG023472.1,CCG016429.1,CCG023199.2,CCG028032.1,CCG027202.1,CCG003397.1,CCG016826.1,CCG013059.1,CCG025836.1,CCG018482.1,CCG026520.1,CCG013289.1,CCG004193.1,CCG008547.1,CCG028168.1,CCG027970.1,CCG025833.1,CCG027314.1,CCG028375.1,CCG012156.1,CCG024447.1,CCG000944.1,CCG006871.1,CCG024511.1,CCG006965.1,CCG002605.1,CCG013247.1,CCG003751.1,CCG021648.1,CCG007410.1,CCG014903.1,CCG025177.1,CCG013602.1,CCG011110.1,CCG004016.1,CCG011231.2,CCG000562.1,CCG020662.1,CCG009995.1,CCG002167.1,CCG022502.1,CCG022395.1,CCG003683.2,CCG026014.2,CCG019133.1,CCG000753.2,CCG006785.1,CCG000775.1,CCG023895.1,CCG010279.1,CCG001163.1,CCG022434.1,CCG016827.1,CCG006374.1,CCG004015.1,CCG010190.1,CCG006972.1,CCG007909.1,CCG005515.1,CCG022858.1 |

|            |                                           |                        |                            |   |                                                                                                                                                                                                                                                                                                                                                                                                                                                                                                                                                                                                                                                                                                                                                                                                                                                                                                                                                                                                                                                                                                                                                                         |
|------------|-------------------------------------------|------------------------|----------------------------|---|-------------------------------------------------------------------------------------------------------------------------------------------------------------------------------------------------------------------------------------------------------------------------------------------------------------------------------------------------------------------------------------------------------------------------------------------------------------------------------------------------------------------------------------------------------------------------------------------------------------------------------------------------------------------------------------------------------------------------------------------------------------------------------------------------------------------------------------------------------------------------------------------------------------------------------------------------------------------------------------------------------------------------------------------------------------------------------------------------------------------------------------------------------------------------|
| GO:0016829 | lyase activity                            | 61 of 6765 in the list | 120 of 12752 in the genome | 1 | CCG004532.1,CCG014379.1,CCG027212.1,CCG006606.1,CCG026047.1,CCG026511.1,CCG019574.1,CCG008959.2,CCG017175.1,CCG001440.1,CCG007610.1,CCG021086.2,CCG028623.1,CCG018745.1,CCG012619.1,CCG017708.1,CCG005110.1,CCG001842.1,CCG023350.1,CCG000016.1,CCG026174.1,CCG012140.1,CCG018744.1,CCG009756.1,CCG023354.1,CCG022453.1,CCG012249.1,CCG008960.1,CCG016315.1,CCG005923.1,CCG022027.1,CCG022035.1,CCG012843.1,CCG023355.1,CCG011839.1,CCG009662.1,CCG026898.1,CCG028524.1,CCG008776.1,CCG007993.1,CCG020956.1,CCG012308.1,CCG023780.2,CCG018453.1,CCG012840.1,CCG013365.1,CCG017278.1,CCG013339.1,CCG025940.1,CCG006998.1,CCG015276.2,CCG024792.1,CCG001445.1,CCG003173.1,CCG018448.1,CCG015411.1,CCG009764.1,CCG010944.1,CCG025277.1,CCG001553.1,CCG006896.1                                                                                                                                                                                                                                                                                                                                                                                                             |
| GO:0022804 | active transmembrane transporter activity | 93 of 6765 in the list | 182 of 12752 in the genome | 1 | CCG000855.1,CCG017693.1,CCG024345.1,CCG023060.1,CCG003545.1,CCG019590.1,CCG000210.1,CCG000585.1,CCG004309.1,CCG020167.1,CCG016128.1,CCG028141.1,CCG016245.1,CCG025989.2,CCG017612.1,CCG017230.3,CCG027758.1,CCG019768.1,CCG017683.1,CCG017552.1,CCG009481.1,CCG016326.1,CCG013708.1,CCG023784.1,CCG010222.1,CCG001379.1,CCG005140.1,CCG002038.1,CCG012061.1,CCG026799.1,CCG010663.1,CCG027185.1,CCG010711.1,CCG025510.1,CCG023190.1,CCG006486.1,CCG016959.1,CCG005924.2,CCG001899.1,CCG010939.1,CCG017641.1,CCG016654.1,CCG013420.1,CCG016661.1,CCG021934.1,CCG025323.1,CCG016673.1,CCG004308.1,CCG010710.1,CCG020313.2,CCG000392.1,CCG023640.1,CCG009082.1,CCG001585.1,CCG026314.1,CCG023980.1,CCG027718.1,CCG022510.1,CCG025348.1,CCG025309.1,CCG017627.1,CCG022692.1,CCG019619.1,CCG026707.1,CCG024383.1,CCG022789.1,CCG023213.1,CCG026052.1,CCG023674.1,CCG016956.1,CCG001066.1,CCG019866.1,CCG019678.1,CCG007724.1,CCG017137.1,CCG022511.1,CCG023191.1,CCG012096.1,CCG024382.1,CCG015410.1,CCG024034.1,CCG010570.1,CCG019789.1,CCG026151.1,CCG012350.1,CCG015143.1,CCG020769.1,CCG009022.2,CCG020768.2,CCG017125.1,CCG025851.1,CCG001285.1,CCG016909.1,CCG013932.1 |
| GO:0004104 | cholinesterase activity                   | 2 of 6765 in the list  | 4 of 12752 in the genome   | 1 | CCG016909.1,CCG013932.1                                                                                                                                                                                                                                                                                                                                                                                                                                                                                                                                                                                                                                                                                                                                                                                                                                                                                                                                                                                                                                                                                                                                                 |

|            |                                                                                 |                       |                          |   |                         |
|------------|---------------------------------------------------------------------------------|-----------------------|--------------------------|---|-------------------------|
| GO:0004348 | glucosylceramidase activity                                                     | 2 of 6765 in the list | 4 of 12752 in the genome | 1 | CCG019082.1,CCG013509.1 |
| GO:0004407 | histone deacetylase activity                                                    | 2 of 6765 in the list | 4 of 12752 in the genome | 1 | CCG013028.1,CCG020863.1 |
| GO:0004602 | glutathione peroxidase activity                                                 | 2 of 6765 in the list | 4 of 12752 in the genome | 1 | CCG005913.1,CCG009672.1 |
| GO:0004829 | threonine-tRNA ligase activity                                                  | 2 of 6765 in the list | 4 of 12752 in the genome | 1 | CCG002662.1,CCG027607.1 |
| GO:0008192 | RNA guanylyltransferase activity                                                | 2 of 6765 in the list | 4 of 12752 in the genome | 1 | CCG007177.1,CCG005020.1 |
| GO:0009881 | photoreceptor                                                                   | 2 of 6765 in the list | 4 of 12752 in the genome | 1 | CCG015893.1,CCG015924.1 |
| GO:0016670 | oxidoreductase activity, acting on a sulfur group of donors, oxygen as acceptor | 2 of 6765 in the list | 4 of 12752 in the genome | 1 | CCG022463.1,CCG027531.2 |
| GO:0016778 | diphosphotransferase activity                                                   | 2 of 6765 in the list | 4 of 12752 in the genome | 1 | CCG007533.1,CCG010319.1 |
| GO:0016882 | cyclo-ligase activity                                                           | 2 of 6765 in the list | 4 of 12752 in the genome | 1 | CCG000682.1,CCG020441.1 |
| GO:0016972 | thiol oxidase                                                                   | 2 of 6765 in the list | 4 of 12752 in the genome | 1 | CCG022463.1,CCG027531.2 |
| GO:0019213 | deacetylase activity                                                            | 2 of 6765 in the list | 4 of 12752 in the genome | 1 | CCG013028.1,CCG020863.1 |
| GO:0030272 | 5-formyltetrahydrofolate cyclo-ligase                                           | 2 of 6765 in the list | 4 of 12752 in the genome | 1 | CCG000682.1,CCG020441.1 |
| GO:0033558 | protein deacetylase activity                                                    | 2 of 6765 in the list | 4 of 12752 in the genome | 1 | CCG013028.1,CCG020863.1 |
| GO:0070568 | guanylyltransferase activity                                                    | 2 of 6765 in the list | 4 of 12752 in the genome | 1 | CCG007177.1,CCG005020.1 |

|            |                     |                        |                            |   |                                                                                                                                                                                                                                                                                                                                                                                                                                                                                                                                                                                                                                                                                                                                                                                                                                                                                                                                                                                                                                                                                                                                                  |
|------------|---------------------|------------------------|----------------------------|---|--------------------------------------------------------------------------------------------------------------------------------------------------------------------------------------------------------------------------------------------------------------------------------------------------------------------------------------------------------------------------------------------------------------------------------------------------------------------------------------------------------------------------------------------------------------------------------------------------------------------------------------------------------------------------------------------------------------------------------------------------------------------------------------------------------------------------------------------------------------------------------------------------------------------------------------------------------------------------------------------------------------------------------------------------------------------------------------------------------------------------------------------------|
| GO:0003924 | GTPase activity     | 74 of 6765 in the list | 146 of 12752 in the genome | 1 | CCG010133.1,CCG006420.1,CCG017420.1,CCG002549.1,CCG007060.1,CCG013000.1,CCG025456.1,CCG007667.1,CCG017657.1,CCG024327.1,CCG015386.1,CCG019020.1,CCG009243.1,CCG027802.1,CCG009607.1,CCG011006.1,CCG017585.1,CCG020318.1,CCG007827.1,CCG014434.1,CCG006421.1,CCG023963.3,CCG025027.1,CCG016370.1,CCG019103.1,CCG019629.2,CCG002917.1,CCG017664.1,CCG020909.1,CCG007532.1,CCG007531.1,CCG018447.1,CCG016966.1,CCG018820.3,CCG010193.1,CCG025179.1,CCG006777.1,CCG003639.1,CCG025973.1,CCG013637.1,CCG010418.1,CCG009080.1,CCG004869.1,CCG028579.1,CCG023999.1,CCG025396.1,CCG026953.1,CCG006924.1,CCG003004.1,CCG021220.1,CCG025991.2,CCG008748.1,CCG013641.1,CCG016027.1,CCG015289.1,CCG003495.1,CCG021411.1,CCG000955.1,CCG001859.1,CCG026336.1,CCG005622.1,CCG026617.1,CCG005886.1,CCG016542.1,CCG025131.2,CCG015654.1,CCG026154.1,CCG002852.1,CCG010864.1,CCG026640.1,CCG010957.1,CCG018403.1,CCG021152.1,CCG023                                                                                                                                                                                                                               |
| GO:0005509 | calcium ion binding | 93 of 6765 in the list | 183 of 12752 in the genome | 1 | CCG026424.3,CCG022123.1,CCG004945.1,CCG007182.1,CCG014981.1,CCG016263.1,CCG018309.1,CCG000237.1,CCG007239.1,CCG007356.1,CCG009782.1,CCG024776.1,CCG017496.1,CCG024092.1,CCG010552.1,CCG018925.1,CCG020013.1,CCG010304.1,CCG013301.1,CCG014760.1,CCG025387.1,CCG023397.2,CCG004774.1,CCG019884.1,CCG023913.3,CCG009416.1,CCG002811.1,CCG011507.1,CCG007810.2,CCG018101.1,CCG028158.1,CCG004549.1,CCG011172.1,CCG009407.1,CCG013615.1,CCG002917.1,CCG023057.1,CCG000127.1,CCG010562.1,CCG014399.1,CCG003365.1,CCG004145.1,CCG022540.1,CCG011595.1,CCG018268.1,CCG008402.1,CCG012133.1,CCG013272.2,CCG028106.1,CCG010262.1,CCG005998.1,CCG022140.1,CCG015801.1,CCG010726.2,CCG001422.1,CCG021360.1,CCG003947.1,CCG015351.1,CCG026472.1,CCG006403.1,CCG002875.1,CCG007575.1,CCG004542.1,CCG004868.1,CCG028627.1,CCG007117.1,CCG007786.1,CCG005349.1,CCG013707.1,CCG018229.1,CCG012595.1,CCG017729.1,CCG008135.1,CCG019775.1,CCG013892.1,CCG028611.1,CCG012634.1,CCG013470.2,CCG012817.1,CCG022580.1,CCG016919.1,CCG012275.1,CCG014228.2,CCG019245.2,CCG025395.1,CCG019697.2,CCG000409.1,CCG008809.1,CCG009781.1,CCG016446.1,CCG027757.1,CCG003386.1, |

|            |                                                                                        |                        |                           |   |                                                                                                                                                                                                                                                                                      |
|------------|----------------------------------------------------------------------------------------|------------------------|---------------------------|---|--------------------------------------------------------------------------------------------------------------------------------------------------------------------------------------------------------------------------------------------------------------------------------------|
| GO:0051537 | 2 iron, 2 sulfur cluster binding                                                       | 15 of 6765 in the list | 31 of 12752 in the genome | 1 | CCG020186.1,CCG012797.1,CCG012771.1,CCG012769.2,CCG012770.1,CCG017391.1,CCG015537.1,CCG020081.1,CCG010284.1,CCG025096.1,CCG026839.1,CCG021619.1,CCG010283.1,CCG007619                                                                                                                |
| GO:0044769 | ATPase activity, coupled to transmembrane movement of ions, rotational                 | 14 of 6765 in the list | 29 of 12752 in the genome | 1 | CCG015410.1,CCG002038.1,CCG023640.1,CCG001066.1,CCG000585.1,CCG025348.1,CCG019678.1,CCG007724.1,CCG025989.2,CCG006486.1,CCG021934.1,CCG019619.1,CCG005924.2,CCG001285.1                                                                                                              |
| GO:0016620 | oxidoreductase activity, acting on the aldehyde or oxo group of donors, NAD or NADP as | 18 of 6765 in the list | 37 of 12752 in the genome | 1 | CCG022181.1,CCG015450.1,CCG018913.1,CCG010038.1,CCG017170.1,CCG005162.1,CCG025346.1,CCG025494.1,CCG013417.1,CCG005163.1,CCG021540.1,CCG018921.1,CCG023451.1,CCG024565.2,CCG012915.1,CCG010039.1,CCG018922.1,CCG017698.1                                                              |
| GO:0019829 | cation-transporting ATPase activity                                                    | 19 of 6765 in the list | 39 of 12752 in the genome | 1 | CCG004308.1,CCG015410.1,CCG017693.1,CCG002038.1,CCG023640.1,CCG026314.1,CCG000585.1,CCG004309.1,CCG025348.1,CCG025989.2,CCG006486.1,CCG019619.1,CCG005924.2,CCG001066.1,CCG019866.1,CCG007724.1,CCG019678.1,CCG021934.1,CCG0                                                         |
| GO:0016765 | transferase activity, transferring alkyl or aryl (other than methyl) groups            | 12 of 6765 in the list | 25 of 12752 in the genome | 1 | CCG008654.1,CCG019263.1,CCG008609.1,CCG009515.2,CCG024801.1,CCG011968.1,CCG023099.1,CCG023181.1,CCG019857.1,CCG016955.1,CCG016005.1,CCG020408.1                                                                                                                                      |
| GO:0031072 | heat shock protein binding                                                             | 24 of 6765 in the list | 49 of 12752 in the genome | 1 | CCG003491.1,CCG009649.3,CCG020060.1,CCG013640.1,CCG022509.1,CCG023148.1,CCG009881.1,CCG016271.1,CCG020417.1,CCG011874.1,CCG005429.3,CCG002446.2,CCG003657.2,CCG005738.1,CCG012726.1,CCG026112.1,CCG026959.1,CCG016741.1,CCG005024.1,CCG017031.1,CCG025031.1,CCG022993.1,CCG000413.3, |

|            |                                                                              |                        |                            |   |                                                                                                                                                                                                                                                                                                                                                                                                                                                                                                                                                                                                                                                                         |
|------------|------------------------------------------------------------------------------|------------------------|----------------------------|---|-------------------------------------------------------------------------------------------------------------------------------------------------------------------------------------------------------------------------------------------------------------------------------------------------------------------------------------------------------------------------------------------------------------------------------------------------------------------------------------------------------------------------------------------------------------------------------------------------------------------------------------------------------------------------|
| GO:0016881 | acid-amino acid<br>ligase activity                                           | 54 of 6765 in the list | 108 of 12752 in the genome | 1 | CCG003060.1,CCG011071.1,CCG013109.1,CCG014351.1,CCG021760.1,CCG011192.2,CCG027737.1,CCG009151.1,CCG010187.2,CCG020873.1,CCG001925.1,CCG022370.1,CCG016189.1,CCG027008.1,CCG020757.1,CCG004333.1,CCG006505.1,CCG020078.1,CCG002368.1,CCG026590.1,CCG019549.1,CCG007809.1,CCG015864.1,CCG019139.1,CCG002897.1,CCG019482.1,CCG011837.1,CCG010561.1,CCG006341.1,CCG015294.1,CCG007600.1,CCG012077.1,CCG020230.3,CCG007254.1,CCG023677.2,CCG027495.1,CCG020203.1,CCG028181.1,CCG023429.1,CCG001635.1,CCG014219.1,CCG026099.1,CCG013913.1,CCG014322.1,CCG008557.1,CCG028305.1,CCG018268.1,CCG013505.1,CCG017330.1,CCG027270.1,CCG021851.2,CCG008808.1,CCG011474.1,CCG024872.1 |
| GO:0008375 | acetylglucosaminylt<br>ransferase activity                                   | 7 of 6765 in the list  | 15 of 12752 in the genome  | 1 | CCG017559.1,CCG011531.1,CCG001180.1,CCG016003.1,CCG025840.1,CCG017197.1,CCG014839.1                                                                                                                                                                                                                                                                                                                                                                                                                                                                                                                                                                                     |
| GO:0008762 | UDP-N-<br>acetylmuramate<br>dehydrogenase<br>activity                        | 6 of 6765 in the list  | 13 of 12752 in the genome  | 1 | CCG002113.1,CCG019263.1,CCG004916.1,CCG019857.1,CCG027048.1,CCG020408.1                                                                                                                                                                                                                                                                                                                                                                                                                                                                                                                                                                                                 |
| GO:0004089 | carbonate<br>dehydratase                                                     | 5 of 6765 in the list  | 11 of 12752 in the genome  | 1 | CCG008960.1,CCG023355.1,CCG026511.1,CCG023354.1,CCG008959.2                                                                                                                                                                                                                                                                                                                                                                                                                                                                                                                                                                                                             |
| GO:0004629 | phospholipase C<br>activity                                                  | 5 of 6765 in the list  | 11 of 12752 in the genome  | 1 | CCG025387.1,CCG026695.1,CCG014647.1,CCG001012.1,CCG008603.1                                                                                                                                                                                                                                                                                                                                                                                                                                                                                                                                                                                                             |
| GO:0015297 | antiporter activity                                                          | 5 of 6765 in the list  | 11 of 12752 in the genome  | 1 | CCG023190.1,CCG012061.1,CCG023191.1,CCG023671.2,CCG016                                                                                                                                                                                                                                                                                                                                                                                                                                                                                                                                                                                                                  |
| GO:0042626 | ATPase activity,<br>coupled to<br>transmembrane<br>movement of<br>substances | 48 of 6765 in the list | 97 of 12752 in the genome  | 1 | CCG004308.1,CCG000855.1,CCG020313.2,CCG017693.1,CCG024345.1,CCG000392.1,CCG023640.1,CCG001585.1,CCG003545.1,CCG026314.1,CCG000585.1,CCG004309.1,CCG020167.1,CCG022510.1,CCG025348.1,CCG017627.1,CCG025989.2,CCG019619.1,CCG022692.1,CCG019768.1,CCG017683.1,CCG023213.1,CCG023674.1,CCG026052.1,CCG001066.1,CCG009481.1,CCG019866.1,CCG019678.1,CCG007724.1,CCG023784.1,CCG022511.1,CCG001379.1,CCG015410.1,CCG002038.1,CCG010663.1,CCG010570.1,CCG025510.1,CCG019789.1,CCG015143.1,CCG006486.1,CCG005924.2,CCG020769.1,CCG001899.1,CCG020768.2,CCG016661.1,CCG025851.1,CCG024824.1,CCG004285.1                                                                         |

|            |                                                            |                        |                           |   |                                                                                                                                                                                                                                                                                                                                                                                                                                                                                                                                                                                                 |
|------------|------------------------------------------------------------|------------------------|---------------------------|---|-------------------------------------------------------------------------------------------------------------------------------------------------------------------------------------------------------------------------------------------------------------------------------------------------------------------------------------------------------------------------------------------------------------------------------------------------------------------------------------------------------------------------------------------------------------------------------------------------|
| GO:0043492 | ATPase activity, coupled to movement of substances         | 48 of 6765 in the list | 97 of 12752 in the genome | 1 | CCG004308.1,CCG000855.1,CCG020313.2,CCG017693.1,CCG024345.1,CCG000392.1,CCG023640.1,CCG001585.1,CCG003545.1,CCG026314.1,CCG000585.1,CCG004309.1,CCG020167.1,CCG022510.1,CCG025348.1,CCG017627.1,CCG025989.2,CCG019619.1,CCG022692.1,CCG019768.1,CCG017683.1,CCG023213.1,CCG023674.1,CCG026052.1,CCG001066.1,CCG009481.1,CCG019866.1,CCG019678.1,CCG007724.1,CCG023784.1,CCG022511.1,CCG001379.1,CCG015410.1,CCG002038.1,CCG010663.1,CCG010570.1,CCG025510.1,CCG019789.1,CCG015143.1,CCG006486.1,CCG005924.2,CCG020769.1,CCG001899.1,CCG020768.2,CCG016661.1,CCG025851.1,CCG004308.1,CCG000855.1 |
| GO:0042625 | ATPase activity, coupled to transmembrane movement of ions | 26 of 6765 in the list | 54 of 12752 in the genome | 1 | CCG004308.1,CCG000855.1,CCG015410.1,CCG017693.1,CCG002038.1,CCG023640.1,CCG003545.1,CCG026314.1,CCG000585.1,CCG004309.1,CCG025348.1,CCG017627.1,CCG025989.2,CCG006486.1,CCG019619.1,CCG005924.2,CCG023674.1,CCG026052.1,CCG001066.1,CCG009481.1,CCG019866.1,CCG016661.1,CCG019678.1,CCG007724.1,CCG021934.1,CCG001285.1                                                                                                                                                                                                                                                                         |
| GO:0016298 | lipase activity                                            | 18 of 6765 in the list | 38 of 12752 in the genome | 1 | CCG010367.1,CCG015949.1,CCG014647.1,CCG028418.1,CCG001012.1,CCG008603.1,CCG015351.1,CCG017255.1,CCG017257.1,CCG024092.1,CCG021640.1,CCG012875.1,CCG010255.1,CCG016997.1,CCG010257.1,CCG025387.1,CCG026695.1,CCG019697.2                                                                                                                                                                                                                                                                                                                                                                         |
| GO:0004842 | ubiquitin-protein ligase activity                          | 16 of 6765 in the list | 34 of 12752 in the genome | 1 | CCG019139.1,CCG003060.1,CCG011837.1,CCG027737.1,CCG006341.1,CCG020230.3,CCG022370.1,CCG016189.1,CCG014219.1,CCG020757.1,CCG008557.1,CCG018268.1,CCG006505.1,CCG008808.1,CCG021851.3,CCG024872.1                                                                                                                                                                                                                                                                                                                                                                                                 |
| GO:0019787 | small conjugating protein ligase activity                  | 16 of 6765 in the list | 34 of 12752 in the genome | 1 | CCG019139.1,CCG003060.1,CCG011837.1,CCG027737.1,CCG006341.1,CCG020230.3,CCG022370.1,CCG016189.1,CCG014219.1,CCG020757.1,CCG008557.1,CCG018268.1,CCG006505.1,CCG008808.1,CCG021851.3,CCG024872.1                                                                                                                                                                                                                                                                                                                                                                                                 |
| GO:0052689 | carboxylic ester hydrolase activity                        | 15 of 6765 in the list | 32 of 12752 in the genome | 1 | CCG010367.1,CCG026530.1,CCG012875.1,CCG028184.1,CCG016997.1,CCG015351.1,CCG019697.2,CCG017255.1,CCG016909.1,CCG001788.1,CCG017257.1,CCG001051.1,CCG024092.1,CCG021640                                                                                                                                                                                                                                                                                                                                                                                                                           |
| GO:0036442 | hydrogen-exporting ATPase activity                         | 13 of 6765 in the list | 28 of 12752 in the genome | 1 | CCG015410.1,CCG002038.1,CCG023640.1,CCG001066.1,CCG000585.1,CCG025348.1,CCG019678.1,CCG007724.1,CCG006486.1,CCG021934.1,CCG019619.1,CCG005924.2,CCG001285.1                                                                                                                                                                                                                                                                                                                                                                                                                                     |

|            |                                                                                 |                       |                          |   |                                     |
|------------|---------------------------------------------------------------------------------|-----------------------|--------------------------|---|-------------------------------------|
| GO:0004075 | biotin carboxylase activity                                                     | 3 of 6765 in the list | 7 of 12752 in the genome | 1 | CCG012408.1,CCG004388.1,CCG017097.1 |
| GO:0004675 | transmembrane receptor protein serine/threonine kinase activity                 | 3 of 6765 in the list | 7 of 12752 in the genome | 1 | CCG020326.1,CCG024790.1,CCG017773.1 |
| GO:0005375 | copper ion transmembrane transporter activity                                   | 3 of 6765 in the list | 7 of 12752 in the genome | 1 | CCG019866.1,CCG003878.1,CCG000927.1 |
| GO:0016668 | oxidoreductase activity, acting on a sulfur group of donors, NAD(P) as acceptor | 3 of 6765 in the list | 7 of 12752 in the genome | 1 | CCG004595.1,CCG009674.1,CCG022471.1 |
| GO:0017176 | phosphatidylinositol N-acetylglucosaminyltransferase activity                   | 3 of 6765 in the list | 7 of 12752 in the genome | 1 | CCG011531.1,CCG001180.1,CCG014839.1 |
| GO:0046915 | transition metal ion transmembrane transporter activity                         | 3 of 6765 in the list | 7 of 12752 in the genome | 1 | CCG019866.1,CCG003878.1,CCG000927.1 |

|            |                                                                       |                        |                            |   |                                                                                                                                                                                                                                                                                                                                                                                                                                                                                                                                                                                                                                                                                                                                                                                                                                                                                                                                                                                                                                                                                                                                                                                                        |
|------------|-----------------------------------------------------------------------|------------------------|----------------------------|---|--------------------------------------------------------------------------------------------------------------------------------------------------------------------------------------------------------------------------------------------------------------------------------------------------------------------------------------------------------------------------------------------------------------------------------------------------------------------------------------------------------------------------------------------------------------------------------------------------------------------------------------------------------------------------------------------------------------------------------------------------------------------------------------------------------------------------------------------------------------------------------------------------------------------------------------------------------------------------------------------------------------------------------------------------------------------------------------------------------------------------------------------------------------------------------------------------------|
| GO:0016746 | transferase activity, transferring acyl groups                        | 99 of 6765 in the list | 198 of 12752 in the genome | 1 | CCG026016.1,CCG008829.1,CCG008842.1,CCG005392.1,CCG022854.1,CCG023678.1,CCG000184.1,CCG026015.1,CCG011547.1,CCG023345.1,CCG021738.1,CCG013575.1,CCG022255.1,CCG023472.1,CCG016429.1,CCG023199.2,CCG028032.1,CCG027202.1,CCG003397.1,CCG016826.1,CCG013059.1,CCG000980.1,CCG025836.1,CCG004442.1,CCG018418.2,CCG021825.3,CCG026897.2,CCG017268.1,CCG018482.1,CCG026520.1,CCG013289.1,CCG004193.1,CCG008547.1,CCG015302.1,CCG028168.1,CCG027970.1,CCG025833.1,CCG027314.1,CCG024760.1,CCG028375.1,CCG012156.1,CCG024447.1,CCG014407.1,CCG000944.1,CCG006871.1,CCG004514.1,CCG024511.1,CCG006965.1,CCG002605.1,CCG013247.1,CCG003751.1,CCG015402.1,CCG006745.1,CCG021648.1,CCG007410.1,CCG014903.1,CCG021197.1,CCG018120.1,CCG025177.1,CCG013602.1,CCG013131.1,CCG009106.1,CCG005130.1,CCG011110.1,CCG004016.1,CCG011231.2,CCG023506.1,CCG011299.1,CCG000562.1,CCG020662.1,CCG009995.1,CCG007496.1,CCG007310.1,CCG012783.1,CCG002167.1,CCG022502.1,CCG022395.1,CCG019133.1,CCG003683.2,CCG026014.2,CCG000753.2,CCG006785.1,CCG000611.1,CCG000775.1,CCG010279.1,CCG001163.1,CCG023895.1,CCG022434.1,CCG001365.1,CCG003852.1,CCG016827.1,CCG005422.1,CCG006374.1,CCG010190.1,CCG004015.1,CCG006972.1,CCG005 |
| GO:0005253 | anion channel activity                                                | 8 of 6765 in the list  | 18 of 12752 in the genome  | 1 | CCG017477.1,CCG013013.1,CCG006770.1,CCG001279.1,CCG026240.1,CCG022510.1,CCG025510.1,CCG020769.1                                                                                                                                                                                                                                                                                                                                                                                                                                                                                                                                                                                                                                                                                                                                                                                                                                                                                                                                                                                                                                                                                                        |
| GO:0016810 | hydrolase activity, acting on carbon-nitrogen (but not peptide) bonds | 29 of 6765 in the list | 61 of 12752 in the genome  | 1 | CCG005760.1,CCG021085.1,CCG023728.1,CCG019506.1,CCG020799.1,CCG019470.1,CCG022273.1,CCG019509.1,CCG015907.1,CCG020863.1,CCG000528.1,CCG025340.1,CCG000472.1,CCG028235.1,CCG019749.1,CCG023501.1,CCG005938.1,CCG018108.1,CCG023779.1,CCG012788.3,CCG028454.1,CCG013028.1,CCG026030.1,CCG020771.1,CCG007652.2,CCG027962.1,CCG005029.1,CCG017                                                                                                                                                                                                                                                                                                                                                                                                                                                                                                                                                                                                                                                                                                                                                                                                                                                             |
| GO:0030170 | pyridoxal phosphate binding                                           | 25 of 6765 in the list | 53 of 12752 in the genome  | 1 | CCG009860.1,CCG012843.1,CCG004547.1,CCG020099.1,CCG009662.1,CCG008776.1,CCG008237.1,CCG027413.1,CCG028623.1,CCG019258.1,CCG005192.1,CCG012619.1,CCG025636.2,CCG015276.2,CCG018575.1,CCG013026.1,CCG015278.1,CCG004495.1,CCG015568.1,CCG001553.1,CCG016315.1,CCG020368.1,CCG006896.1,                                                                                                                                                                                                                                                                                                                                                                                                                                                                                                                                                                                                                                                                                                                                                                                                                                                                                                                   |

|            |                                                                                                |                        |                            |   |                                                                                                                                                                                                                                                                                                                                                                                                                                                                                                                                                                                                                         |
|------------|------------------------------------------------------------------------------------------------|------------------------|----------------------------|---|-------------------------------------------------------------------------------------------------------------------------------------------------------------------------------------------------------------------------------------------------------------------------------------------------------------------------------------------------------------------------------------------------------------------------------------------------------------------------------------------------------------------------------------------------------------------------------------------------------------------------|
| GO:0004857 | enzyme inhibitor activity                                                                      | 40 of 6765 in the list | 83 of 12752 in the genome  | 1 | CCG014539.1,CCG004025.1,CCG003703.1,CCG028409.1,CCG025560.1,CCG008364.1,CCG002228.1,CCG010489.1,CCG001347.1,CCG003758.1,CCG009450.1,CCG016437.1,CCG012125.1,CCG023881.1,CCG011387.1,CCG016436.1,CCG010364.1,CCG005113.1,CCG021652.1,CCG025139.1,CCG023147.1,CCG021962.1,CCG008308.1,CCG002170.1,CCG002823.1,CCG006063.1,CCG021961.1,CCG014461.1,CCG011089.1,CCG021651.1,CCG000890.1,CCG017560.1,CCG012779.1,CCG016011.1,CCG024998.1,CCG014258.1,CCG025057.1,CCG001701.1,CCG010812.1,CCG010101.1                                                                                                                         |
| GO:0016820 | hydrolase activity, acting on acid anhydrides, catalyzing transmembrane movement of substances | 50 of 6765 in the list | 103 of 12752 in the genome | 1 | CCG004308.1,CCG000855.1,CCG020313.2,CCG017693.1,CCG024345.1,CCG000392.1,CCG023640.1,CCG001585.1,CCG003545.1,CCG026314.1,CCG000585.1,CCG004309.1,CCG020167.1,CCG022510.1,CCG025348.1,CCG017627.1,CCG025989.2,CCG012534.1,CCG019619.1,CCG022692.1,CCG019768.1,CCG017683.1,CCG023213.1,CCG023674.1,CCG026052.1,CCG001066.1,CCG009481.1,CCG019866.1,CCG019678.1,CCG007724.1,CCG023784.1,CCG022511.1,CCG001379.1,CCG015410.1,CCG002038.1,CCG010663.1,CCG010570.1,CCG010696.1,CCG025510.1,CCG019789.1,CCG015143.1,CCG006486.1,CCG005924.2,CCG020769.1,CCG001899.1,CCG020768.2,CCG016664.1,CCG025854.1,CCG024024.1,CCG004085.1 |
| GO:0004000 | adenosine deaminase activity                                                                   | 2 of 6765 in the list  | 5 of 12752 in the genome   | 1 | CCG027962.1,CCG017295.1                                                                                                                                                                                                                                                                                                                                                                                                                                                                                                                                                                                                 |
| GO:0004488 | methylenetetrahydrofolate dehydrogenase                                                        | 2 of 6765 in the list  | 5 of 12752 in the genome   | 1 | CCG011491.1,CCG015943.1                                                                                                                                                                                                                                                                                                                                                                                                                                                                                                                                                                                                 |
| GO:0004499 | N,N-dimethylaniline monooxygenase activity                                                     | 2 of 6765 in the list  | 5 of 12752 in the genome   | 1 | CCG008900.1,CCG008902.1                                                                                                                                                                                                                                                                                                                                                                                                                                                                                                                                                                                                 |
| GO:0004616 | phosphogluconate dehydrogenase (decarboxylating) activity                                      | 2 of 6765 in the list  | 5 of 12752 in the genome   | 1 | CCG025307.1,CCG009084.2                                                                                                                                                                                                                                                                                                                                                                                                                                                                                                                                                                                                 |
| GO:0005451 | monovalent cation:hydrogen antiporter activity                                                 | 2 of 6765 in the list  | 5 of 12752 in the genome   | 1 | CCG023671.2,CCG016956.1                                                                                                                                                                                                                                                                                                                                                                                                                                                                                                                                                                                                 |

|            |                                                                     |                        |                           |   |                                                                                                                                                                                                             |
|------------|---------------------------------------------------------------------|------------------------|---------------------------|---|-------------------------------------------------------------------------------------------------------------------------------------------------------------------------------------------------------------|
| GO:0008318 | protein prenyltransferase activity                                  | 2 of 6765 in the list  | 5 of 12752 in the genome  | 1 | CCG024801.1,CCG023181.1                                                                                                                                                                                     |
| GO:0008374 | O-acyltransferase activity                                          | 2 of 6765 in the list  | 5 of 12752 in the genome  | 1 | CCG006965.1,CCG010190.1                                                                                                                                                                                     |
| GO:0015385 | sodium:hydrogen antiporter activity                                 | 2 of 6765 in the list  | 5 of 12752 in the genome  | 1 | CCG023671.2,CCG016956.1                                                                                                                                                                                     |
| GO:0015491 | cation:cation antiporter activity                                   | 2 of 6765 in the list  | 5 of 12752 in the genome  | 1 | CCG023671.2,CCG016956.1                                                                                                                                                                                     |
| GO:0016847 | 1-aminocyclopropane -1-carboxylate synthase activity                | 2 of 6765 in the list  | 5 of 12752 in the genome  | 1 | CCG015276.2,CCG016315.1                                                                                                                                                                                     |
| GO:0016888 | endodeoxyribonuclease activity, producing 5'-phosphomonoester       | 2 of 6765 in the list  | 5 of 12752 in the genome  | 1 | CCG004076.1,CCG016030.1                                                                                                                                                                                     |
| GO:0019888 | protein phosphatase                                                 | 2 of 6765 in the list  | 5 of 12752 in the genome  | 1 | CCG009450.1,CCG017560.1                                                                                                                                                                                     |
| GO:0008146 | sulfotransferase activity                                           | 17 of 6765 in the list | 37 of 12752 in the genome | 1 | CCG006316.3,CCG005374.1,CCG000331.1,CCG009628.1,CCG015986.1,CCG014538.1,CCG009803.1,CCG001545.1,CCG006318.2,CCG006595.1,CCG000672.1,CCG027035.1,CCG027037.1,CCG017094.1,CCG014565.1,CCG027036.3,CCG008245.1 |
| GO:0015108 | chloride transmembrane transporter activity                         | 6 of 6765 in the list  | 14 of 12752 in the genome | 1 | CCG017477.1,CCG016326.1,CCG006770.1,CCG025510.1,CCG022510.1,CCG020769.1                                                                                                                                     |
| GO:0019904 | protein domain specific binding                                     | 6 of 6765 in the list  | 14 of 12752 in the genome | 1 | CCG018859.3,CCG014575.1,CCG025338.1,CCG011188.1,CCG017033.1,CCG015583.1                                                                                                                                     |
| GO:0016780 | phosphotransferase activity, for other substituted phosphate groups | 5 of 6765 in the list  | 12 of 12752 in the genome | 1 | CCG022352.1,CCG004125.1,CCG024155.1,CCG009653.1,CCG023102.1                                                                                                                                                 |
| GO:0046961 | proton-transporting ATPase activity, rotational                     | 12 of 6765 in the list | 27 of 12752 in the genome | 1 | CCG015410.1,CCG002038.1,CCG023640.1,CCG001066.1,CCG000585.1,CCG025348.1,CCG019678.1,CCG006486.1,CCG021934.1,CCG019619.1,CCG005924.2,CCG001285.1                                                             |

|            |                                                       |                        |                            |   |                                                                                                                                                                                                                                                                                                                                                                                                                                                                                                                                                                                                                                                                                      |
|------------|-------------------------------------------------------|------------------------|----------------------------|---|--------------------------------------------------------------------------------------------------------------------------------------------------------------------------------------------------------------------------------------------------------------------------------------------------------------------------------------------------------------------------------------------------------------------------------------------------------------------------------------------------------------------------------------------------------------------------------------------------------------------------------------------------------------------------------------|
| GO:0016769 | transferase activity, transferring nitrogenous groups | 11 of 6765 in the list | 25 of 12752 in the genome  | 1 | CCG009860.1,CCG015276.2,CCG020099.1,CCG025439.1,CCG027413.1,CCG015278.1,CCG022407.1,CCG005192.1,CCG004495.1,CCG016315.1,CCG020368.1                                                                                                                                                                                                                                                                                                                                                                                                                                                                                                                                                  |
| GO:0004497 | monooxygenase activity                                | 35 of 6765 in the list | 74 of 12752 in the genome  | 1 | CCG012202.1,CCG000520.1,CCG005286.1,CCG018055.1,CCG019181.1,CCG015758.1,CCG027557.1,CCG004239.3,CCG024069.1,CCG018945.1,CCG024433.1,CCG008900.1,CCG014436.2,CCG025378.1,CCG018943.2,CCG027108.1,CCG018942.1,CCG018054.1,CCG012305.1,CCG016129.1,CCG001049.1,CCG000820.1,CCG011327.1,CCG028323.1,CCG015680.1,CCG018029.3,CCG003921.1,CCG025827.1,CCG012089.1,CCG018923.1,CCG008902.1,CCG018927.1,CCG008829.1,CCG018482.1,CCG022395.1,CCG005392.1,CCG022854.1,CCG026520.1,CCG023678.1,CCG025177.1,CCG023345.1,CCG008547.1,CCG021738.1,CCG022255.1,CCG028375.1,CCG012156.1,CCG016429.1,CCG020662.1,CCG009995.1,CCG023199.2,CCG028032.1,CCG024511.1,CCG002605.1,CCG005515.1,CCG007909.1, |
| GO:0016410 | N-acyltransferase activity                            | 25 of 6765 in the list | 54 of 12752 in the genome  | 1 | CCG008829.1,CCG018482.1,CCG022395.1,CCG005392.1,CCG022854.1,CCG026520.1,CCG023678.1,CCG025177.1,CCG023345.1,CCG008547.1,CCG021738.1,CCG022255.1,CCG028375.1,CCG012156.1,CCG016429.1,CCG020662.1,CCG009995.1,CCG023199.2,CCG028032.1,CCG024511.1,CCG002605.1,CCG005515.1,CCG007909.1,                                                                                                                                                                                                                                                                                                                                                                                                 |
| GO:0019205 | nucleobase-containing compound kinase                 | 9 of 6765 in the list  | 21 of 12752 in the genome  | 1 | CCG006431.1,CCG017995.1,CCG007417.1,CCG006433.1,CCG021110.1,CCG012374.1,CCG016683.1,CCG006529.1,CCG014116.1                                                                                                                                                                                                                                                                                                                                                                                                                                                                                                                                                                          |
| GO:0000287 | magnesium ion binding                                 | 16 of 6765 in the list | 36 of 12752 in the genome  | 1 | CCG019953.1,CCG024798.1,CCG017200.1,CCG009653.1,CCG022869.1,CCG026617.1,CCG022453.1,CCG010193.1,CCG025277.1,CCG005020.1,CCG027631.1,CCG020318.1,CCG001501.1,CCG011382.1,CCG007533.1,CCG000352.1                                                                                                                                                                                                                                                                                                                                                                                                                                                                                      |
| GO:0015399 | primary active transmembrane transporter activity     | 53 of 6765 in the list | 111 of 12752 in the genome | 1 | CCG004308.1,CCG000855.1,CCG020313.2,CCG017693.1,CCG024345.1,CCG000392.1,CCG023640.1,CCG001585.1,CCG003545.1,CCG026314.1,CCG019590.1,CCG000585.1,CCG004309.1,CCG020167.1,CCG022510.1,CCG025348.1,CCG017627.1,CCG025989.2,CCG019619.1,CCG022692.1,CCG017612.1,CCG019768.1,CCG017683.1,CCG023213.1,CCG023674.1,CCG026052.1,CCG001066.1,CCG009481.1,CCG019866.1,CCG019678.1,CCG007724.1,CCG017137.1,CCG023784.1,CCG022511.1,CCG001379.1,CCG015410.1,CCG002038.1,CCG010663.1,CCG010570.1,CCG025510.1,CCG019789.1,CCG015143.1,CCG006486.1,CCG005924.2,CCG020769.1,CCG001899.1,CCG010939.1,CCG020768.2,CCG017125.1,CCG016661.1,CCG025851.1,CCG021924.1,CCG004285.1                          |

|            |                                                                                              |                        |                            |   |                                                                                                                                                                                                                                                                                                                                                                                                                                                                                                                                                                                                                                                             |
|------------|----------------------------------------------------------------------------------------------|------------------------|----------------------------|---|-------------------------------------------------------------------------------------------------------------------------------------------------------------------------------------------------------------------------------------------------------------------------------------------------------------------------------------------------------------------------------------------------------------------------------------------------------------------------------------------------------------------------------------------------------------------------------------------------------------------------------------------------------------|
| GO:0015405 | P-P-bond-hydrolysis-driven transmembrane transporter activity                                | 53 of 6765 in the list | 111 of 12752 in the genome | 1 | CCG004308.1,CCG000855.1,CCG020313.2,CCG017693.1,CCG024345.1,CCG000392.1,CCG023640.1,CCG001585.1,CCG003545.1,CCG026314.1,CCG019590.1,CCG000585.1,CCG004309.1,CCG020167.1,CCG022510.1,CCG025348.1,CCG017627.1,CCG025989.2,CCG019619.1,CCG022692.1,CCG017612.1,CCG019768.1,CCG017683.1,CCG023213.1,CCG023674.1,CCG026052.1,CCG001066.1,CCG009481.1,CCG019866.1,CCG019678.1,CCG007724.1,CCG017137.1,CCG023784.1,CCG022511.1,CCG001379.1,CCG015410.1,CCG002038.1,CCG010663.1,CCG010570.1,CCG025510.1,CCG019789.1,CCG015143.1,CCG006486.1,CCG005924.2,CCG020769.1,CCG001899.1,CCG010939.1,CCG020768.2,CCG017125.1,CCG016661.1,CCG025851.1,CCG021024.1,CCG001285.1 |
| GO:0015103 | inorganic anion transmembrane transporter activity                                           | 7 of 6765 in the list  | 17 of 12752 in the genome  | 1 | CCG017477.1,CCG016326.1,CCG006770.1,CCG025510.1,CCG022510.1,CCG023244.1,CCG020769.1                                                                                                                                                                                                                                                                                                                                                                                                                                                                                                                                                                         |
| GO:0004563 | beta-N-acetylhexosaminidase activity                                                         | 3 of 6765 in the list  | 8 of 12752 in the genome   | 1 | CCG009169.1,CCG004122.1,CCG010414.1                                                                                                                                                                                                                                                                                                                                                                                                                                                                                                                                                                                                                         |
| GO:0004659 | prenyltransferase activity                                                                   | 3 of 6765 in the list  | 8 of 12752 in the genome   | 1 | CCG024801.1,CCG023099.1,CCG023181.1                                                                                                                                                                                                                                                                                                                                                                                                                                                                                                                                                                                                                         |
| GO:0004707 | MAP kinase activity                                                                          | 3 of 6765 in the list  | 8 of 12752 in the genome   | 1 | CCG011525.1,CCG011886.1,CCG025707.1                                                                                                                                                                                                                                                                                                                                                                                                                                                                                                                                                                                                                         |
| GO:0008241 | peptidyl-dipeptidase activity                                                                | 3 of 6765 in the list  | 8 of 12752 in the genome   | 1 | CCG013364.1,CCG010306.1,CCG014031.1                                                                                                                                                                                                                                                                                                                                                                                                                                                                                                                                                                                                                         |
| GO:0035004 | phosphatidylinositol 3-kinase activity                                                       | 3 of 6765 in the list  | 8 of 12752 in the genome   | 1 | CCG000789.1,CCG011658.1,CCG012959.1                                                                                                                                                                                                                                                                                                                                                                                                                                                                                                                                                                                                                         |
| GO:0046912 | transferase activity, transferring acyl groups, acyl groups converted into alkyl on transfer | 3 of 6765 in the list  | 8 of 12752 in the genome   | 1 | CCG003852.1,CCG021197.1,CCG011547.1                                                                                                                                                                                                                                                                                                                                                                                                                                                                                                                                                                                                                         |
| GO:0005254 | chloride channel activity                                                                    | 5 of 6765 in the list  | 13 of 12752 in the genome  | 1 | CCG017477.1,CCG006770.1,CCG025510.1,CCG022510.1,CCG020769.1                                                                                                                                                                                                                                                                                                                                                                                                                                                                                                                                                                                                 |
| GO:0008484 | sulfuric ester hydrolase activity                                                            | 5 of 6765 in the list  | 13 of 12752 in the genome  | 1 | CCG026903.1,CCG008769.1,CCG019230.1,CCG003496.1,CCG000746.1                                                                                                                                                                                                                                                                                                                                                                                                                                                                                                                                                                                                 |
| GO:0016597 | amino acid binding                                                                           | 5 of 6765 in the list  | 13 of 12752 in the genome  | 1 | CCG018108.1,CCG019258.1,CCG017230.3,CCG018575.1,CCG005                                                                                                                                                                                                                                                                                                                                                                                                                                                                                                                                                                                                      |

|            |                                                    |                        |                           |   |                                                                                                                                                                                                                                                                                    |
|------------|----------------------------------------------------|------------------------|---------------------------|---|------------------------------------------------------------------------------------------------------------------------------------------------------------------------------------------------------------------------------------------------------------------------------------|
| GO:0005024 | transforming growth factor beta-activated receptor | 2 of 6765 in the list  | 6 of 12752 in the genome  | 1 | CCG020326.1,CCG017773.1                                                                                                                                                                                                                                                            |
| GO:0005337 | nucleoside transmembrane transporter activity      | 2 of 6765 in the list  | 6 of 12752 in the genome  | 1 | CCG024034.1,CCG013420.1                                                                                                                                                                                                                                                            |
| GO:0015932 | nucleobase-containing compound transmembrane       | 2 of 6765 in the list  | 6 of 12752 in the genome  | 1 | CCG024034.1,CCG013420.1                                                                                                                                                                                                                                                            |
| GO:0016801 | hydrolase activity, acting on ether                | 2 of 6765 in the list  | 6 of 12752 in the genome  | 1 | CCG012781.1,CCG014378.1                                                                                                                                                                                                                                                            |
| GO:0016843 | amine-lyase activity                               | 2 of 6765 in the list  | 6 of 12752 in the genome  | 1 | CCG011839.1,CCG009756.1                                                                                                                                                                                                                                                            |
| GO:0016844 | strictosidine synthase activity                    | 2 of 6765 in the list  | 6 of 12752 in the genome  | 1 | CCG011839.1,CCG009756.1                                                                                                                                                                                                                                                            |
| GO:0016917 | GABA receptor activity                             | 2 of 6765 in the list  | 6 of 12752 in the genome  | 1 | CCG011730.1,CCG009553.1                                                                                                                                                                                                                                                            |
| GO:0017089 | glycolipid transporter activity                    | 2 of 6765 in the list  | 6 of 12752 in the genome  | 1 | CCG013408.2,CCG024032.1                                                                                                                                                                                                                                                            |
| GO:0019208 | phosphatase regulator activity                     | 2 of 6765 in the list  | 6 of 12752 in the genome  | 1 | CCG009450.1,CCG017560.1                                                                                                                                                                                                                                                            |
| GO:0051861 | glycolipid binding                                 | 2 of 6765 in the list  | 6 of 12752 in the genome  | 1 | CCG013408.2,CCG024032.1                                                                                                                                                                                                                                                            |
| GO:0005184 | neuropeptide hormone activity                      | 4 of 6765 in the list  | 11 of 12752 in the genome | 1 | CCG022367.1,CCG013273.1,CCG017791.1,CCG024248.1                                                                                                                                                                                                                                    |
| GO:0008188 | neuropeptide receptor activity                     | 4 of 6765 in the list  | 11 of 12752 in the genome | 1 | CCG020659.1,CCG023662.1,CCG027921.1,CCG024066.1                                                                                                                                                                                                                                    |
| GO:0019843 | rRNA binding                                       | 4 of 6765 in the list  | 11 of 12752 in the genome | 1 | CCG012741.1,CCG008581.1,CCG000848.1,CCG006336.1                                                                                                                                                                                                                                    |
| GO:0030594 | neurotransmitter receptor activity                 | 4 of 6765 in the list  | 11 of 12752 in the genome | 1 | CCG020659.1,CCG023662.1,CCG027921.1,CCG024066.1                                                                                                                                                                                                                                    |
| GO:0008080 | N-acetyltransferase activity                       | 23 of 6765 in the list | 52 of 12752 in the genome | 1 | CCG008829.1,CCG018482.1,CCG022395.1,CCG005392.1,CCG022854.1,CCG026520.1,CCG023678.1,CCG023345.1,CCG008547.1,CCG021738.1,CCG028375.1,CCG012156.1,CCG016429.1,CCG020662.1,CCG009995.1,CCG023199.2,CCG028032.1,CCG024511.1,CCG02605.1,CCG005515.1,CCG007909.1,CCG022858.1,CCG007410.1 |

|            |                            |                        |                           |   |                                                                                                                                                                                                                                                                                     |
|------------|----------------------------|------------------------|---------------------------|---|-------------------------------------------------------------------------------------------------------------------------------------------------------------------------------------------------------------------------------------------------------------------------------------|
| GO:0016407 | acetyltransferase activity | 23 of 6765 in the list | 52 of 12752 in the genome | 1 | CCG008829.1,CCG018482.1,CCG022395.1,CCG005392.1,CCG022854.1,CCG026520.1,CCG023678.1,CCG023345.1,CCG008547.1,CCG021738.1,CCG028375.1,CCG012156.1,CCG016429.1,CCG020662.1,CCG009995.1,CCG023199.2,CCG028032.1,CCG024511.1,CCG002605.1,CCG005515.1,CCG007909.1,CCG022858.1,CCG007410.1 |
| GO:0005319 | lipid transporter activity | 12 of 6765 in the list | 29 of 12752 in the genome | 1 | CCG027368.1,CCG001220.1,CCG013408.2,CCG011858.1,CCG024032.1,CCG005786.1,CCG016654.1,CCG011183.1,CCG011338.1,CCG000524.1,CCG001221.1,CCG010222.1                                                                                                                                     |

|            |                                                                    |                         |                            |   |                                                                                                                                                                                                                                                                                                                                                                                                                                                                                                                                                                                                                                                                                                                                                                                                                                                                                                                                                                                                                                                                                                                                                                                                                                                                                                                                                                                                                                                                                                                                                                                                                                                                                                                          |
|------------|--------------------------------------------------------------------|-------------------------|----------------------------|---|--------------------------------------------------------------------------------------------------------------------------------------------------------------------------------------------------------------------------------------------------------------------------------------------------------------------------------------------------------------------------------------------------------------------------------------------------------------------------------------------------------------------------------------------------------------------------------------------------------------------------------------------------------------------------------------------------------------------------------------------------------------------------------------------------------------------------------------------------------------------------------------------------------------------------------------------------------------------------------------------------------------------------------------------------------------------------------------------------------------------------------------------------------------------------------------------------------------------------------------------------------------------------------------------------------------------------------------------------------------------------------------------------------------------------------------------------------------------------------------------------------------------------------------------------------------------------------------------------------------------------------------------------------------------------------------------------------------------------|
| GO:0008324 | cation<br>transmembrane<br>transporter activity                    | 146 of 6765 in the list | 298 of 12752 in the genome | 1 | CCG011932.1,CCG013032.1,CCG010159.1,CCG006864.1,CCG010623.2,CCG015823.1,CCG021740.1,CCG004086.1,CCG000585.1,CCG016128.1,CCG006587.2,CCG028141.1,CCG016245.1,CCG025989.2,CCG020879.1,CCG003878.1,CCG027758.1,CCG005277.1,CCG017614.1,CCG016326.1,CCG013708.1,CCG003712.1,CCG024297.1,CCG027184.1,CCG005140.1,CCG009367.1,CCG026799.1,CCG006486.1,CCG016959.1,CCG019190.1,CCG025450.1,CCG003501.1,CCG016654.1,CCG018133.1,CCG023314.1,CCG026050.1,CCG001964.1,CCG017826.1,CCG025323.1,CCG007906.1,CCG016673.1,CCG010710.1,CCG009082.1,CCG023640.1,CCG026796.1,CCG027718.1,CCG009808.1,CCG025348.1,CCG025309.1,CCG019191.1,CCG003662.1,CCG019619.1,CCG006588.2,CCG016495.1,CCG014156.1,CCG024383.1,CCG015914.1,CCG019678.1,CCG012705.1,CCG014000.1,CCG027756.1,CCG012096.1,CCG006004.1,CCG015410.1,CCG009142.1,CCG019647.1,CCG026151.1,CCG024407.1,CCG027182.1,CCG016864.1,CCG000983.1,CCG023751.1,CCG023530.2,CCG000927.1,CCG025914.2,CCG001285.1,CCG017693.1,CCG027229.1,CCG023060.1,CCG007954.1,CCG000210.1,CCG004309.1,CCG008422.1,CCG009327.1,CCG003867.1,CCG010112.1,CCG022464.1,CCG017552.1,CCG016304.1,CCG007334.1,CCG014448.1,CCG018801.1,CCG027154.1,CCG004605.1,CCG010222.1,CCG005496.1,CCG013643.1,CCG002038.1,CCG025467.2,CCG010711.1,CCG025964.1,CCG027585.1,CCG023190.1,CCG000148.1,CCG005924.2,CCG017641.1,CCG013420.1,CCG008587.1,CCG002559.1,CCG015653.1,CCG027498.1,CCG021934.1,CCG019890.1,CCG023983.1,CCG004308.1,CCG006469.1,CCG001649.1,CCG026314.1,CCG023980.1,CCG026839.1,CCG011381.1,CCG000991.1,CCG026707.1,CCG022789.1,CCG016278.1,CCG016956.1,CCG001066.1,CCG019866.1,CCG007724.1,CCG018319.2,CCG024382.1,CCG025568.1,CCG007862.1,CCG025107.1,CCG024034.1,CCG006450.1,CCG012350.1,CCG027974.2, |
| GO:0016782 | transferase activity,<br>transferring sulfur-<br>containing groups | 17 of 6765 in the list  | 40 of 12752 in the genome  | 1 | CCG006316.3,CCG005374.1,CCG000331.1,CCG009628.1,CCG015986.1,CCG014538.1,CCG009803.1,CCG001545.1,CCG006318.2,CCG006595.1,CCG000672.1,CCG027035.1,CCG027037.1,CCG017094.1,CCG014565.1,CCG027036.3,CCG008245.1                                                                                                                                                                                                                                                                                                                                                                                                                                                                                                                                                                                                                                                                                                                                                                                                                                                                                                                                                                                                                                                                                                                                                                                                                                                                                                                                                                                                                                                                                                              |

|            |                                            |                        |                           |   |                                                                                                                                                                                                                                                                                                                         |
|------------|--------------------------------------------|------------------------|---------------------------|---|-------------------------------------------------------------------------------------------------------------------------------------------------------------------------------------------------------------------------------------------------------------------------------------------------------------------------|
| GO:0004197 | cysteine-type endopeptidase activity       | 26 of 6765 in the list | 59 of 12752 in the genome | 1 | CCG015160.1,CCG011044.1,CCG022871.1,CCG004124.1,CCG009690.1,CCG005418.1,CCG009015.1,CCG027392.1,CCG018585.3,CCG027145.1,CCG021664.1,CCG024631.1,CCG001011.2,CCG025300.1,CCG018248.1,CCG009405.1,CCG017233.1,CCG022647.1,CCG004919.1,CCG011410.1,CCG011446.1,CCG003007.1,CCG018692.1,CCG021236.1,CCG002834.1,CCG027393.1 |
| GO:0004185 | serine-type carboxypeptidase activity      | 3 of 6765 in the list  | 9 of 12752 in the genome  | 1 | CCG024082.1,CCG001168.1,CCG006071.1                                                                                                                                                                                                                                                                                     |
| GO:0004623 | phospholipase A2 activity                  | 3 of 6765 in the list  | 9 of 12752 in the genome  | 1 | CCG019697.2,CCG015351.1,CCG024092.1                                                                                                                                                                                                                                                                                     |
| GO:0008609 | alkylglycerone-phosphate synthase activity | 3 of 6765 in the list  | 9 of 12752 in the genome  | 1 | CCG019263.1,CCG019857.1,CCG020408.1                                                                                                                                                                                                                                                                                     |
| GO:0070008 | serine-type exopeptidase                   | 3 of 6765 in the list  | 9 of 12752 in the genome  | 1 | CCG024082.1,CCG001168.1,CCG006071.1                                                                                                                                                                                                                                                                                     |

|            |                    |                          |                             |   |                                                                                                                                                                                                                                                                                                                                                                                                                                                                                                                                                                                                                                                                                                                                                                                                                                                                                                                                                                                                                                                                                                                                                                                                                                                                                                                                                                                                                                                                                                                                                                                                                                                                                                                          |
|------------|--------------------|--------------------------|-----------------------------|---|--------------------------------------------------------------------------------------------------------------------------------------------------------------------------------------------------------------------------------------------------------------------------------------------------------------------------------------------------------------------------------------------------------------------------------------------------------------------------------------------------------------------------------------------------------------------------------------------------------------------------------------------------------------------------------------------------------------------------------------------------------------------------------------------------------------------------------------------------------------------------------------------------------------------------------------------------------------------------------------------------------------------------------------------------------------------------------------------------------------------------------------------------------------------------------------------------------------------------------------------------------------------------------------------------------------------------------------------------------------------------------------------------------------------------------------------------------------------------------------------------------------------------------------------------------------------------------------------------------------------------------------------------------------------------------------------------------------------------|
| GO:0003824 | catalytic activity | 2814 of 6765 in the list | 5384 of 12752 in the genome | 1 | CCG016649.1,CCG006922.1,CCG017420.1,CCG004122.1,CCG004887.1,CCG002508.1,CCG027449.1,CCG000746.1,CCG007306.1,CCG016952.1,CCG016913.1,CCG012875.1,CCG025108.1,CCG027802.1,CCG028016.1,CCG004468.1,CCG023989.1,CCG004020.1,CCG003397.1,CCG000411.1,CCG009839.1,CCG013059.1,CCG025836.1,CCG012949.1,CCG008245.1,CCG017266.1,CCG006875.2,CCG011763.1,CCG025208.1,CCG021479.1,CCG003362.1,CCG023381.1,CCG016094.1,CCG026413.3,CCG023474.1,CCG017255.1,CCG000948.1,CCG022025.2,CCG005053.1,CCG021616.1,CCG027734.1,CCG003767.1,CCG021911.1,CCG007696.1,CCG021110.1,CCG009270.1,CCG019521.1,CCG003624.1,CCG028653.1,CCG003639.1,CCG013109.1,CCG018625.1,CCG006465.1,CCG015694.1,CCG012083.1,CCG016933.1,CCG023451.1,CCG027190.1,CCG024119.1,CCG013641.1,CCG015350.1,CCG021948.1,CCG005487.1,CCG007467.1,CCG013889.1,CCG002923.2,CCG021137.1,CCG013610.1,CCG001876.1,CCG013465.1,CCG018688.1,CCG006456.1,CCG024200.1,CCG008902.1,CCG023458.1,CCG025096.1,CCG024708.1,CCG024865.1,CCG004926.1,CCG006928.1,CCG004532.1,CCG000789.1,CCG019844.1,CCG017381.1,CCG001704.1,CCG005524.1,CCG024784.1,CCG001289.1,CCG011547.1,CCG008404.1,CCG027015.1,CCG022370.1,CCG004055.1,CCG007729.1,CCG020803.1,CCG020179.1,CCG004986.1,CCG007750.2,CCG027989.1,CCG025707.1,CCG028092.1,CCG015981.1,CCG027202.1,CCG019831.2,CCG019825.2,CCG004076.1,CCG011793.1,CCG013775.1,CCG024155.1,CCG016557.1,CCG021990.1,CCG002514.1,CCG027000.1,CCG006804.1,CCG006264.1,CCG015896.1,CCG014205.1,CCG024760.1,CCG010865.1,CCG014222.1,CCG012959.1,CCG018589.1,CCG000612.1,CCG006013.1,CCG021072.1,CCG025897.1,CCG004308.1,CCG002466.1,CCG020944.1,CCG001440.1,CCG009928.1,CCG012666.1,CCG006193.1,CCG014982.1,CCG006572.1,CCG017894.1,CCG018772.1,CCG007724.1, |
|------------|--------------------|--------------------------|-----------------------------|---|--------------------------------------------------------------------------------------------------------------------------------------------------------------------------------------------------------------------------------------------------------------------------------------------------------------------------------------------------------------------------------------------------------------------------------------------------------------------------------------------------------------------------------------------------------------------------------------------------------------------------------------------------------------------------------------------------------------------------------------------------------------------------------------------------------------------------------------------------------------------------------------------------------------------------------------------------------------------------------------------------------------------------------------------------------------------------------------------------------------------------------------------------------------------------------------------------------------------------------------------------------------------------------------------------------------------------------------------------------------------------------------------------------------------------------------------------------------------------------------------------------------------------------------------------------------------------------------------------------------------------------------------------------------------------------------------------------------------------|

CCG020871. 1, CCG015077. 1, CCG003078. 1, CCG001590. 1, CCG006316. 3, CCG010291. 1, CCG015202. 1, CCG019482. 1, CCG009349. 1, CCG003809. 1, CCG023748. 1, CCG022132. 1, CCG016129. 1, CCG0

GO:0008308      voltage-gated anio5 of 6765 in the list14 of 12752 in the genome      1 CCG017477. 1, CCG026240. 1, CCG001279. 1, CCG006770. 1, CCG013013. 1

GO:0008320      protein transmembr5 of 6765 in the list14 of 12752 in the genome      1 CCG019590. 1, CCG017125. 1, CCG010939. 1, CCG017137. 1, CCG017612. 1

GO:0015450      P-P-bond-hydrolysi5 of 6765 in the list14 of 12752 in the genome      1 CCG019590. 1, CCG017125. 1, CCG010939. 1, CCG017137. 1, CCG017612. 1

GO:0022884      macromolecule tran5 of 6765 in the list14 of 12752 in the genome      1 CCG019590. 1, CCG017125. 1, CCG010939. 1, CCG017137. 1, CCG017612. 1

|            |                    |                       |                            |                                                                                                                                                                                                                                                                                                                                                                                                                                                                                                                                                                     |
|------------|--------------------|-----------------------|----------------------------|---------------------------------------------------------------------------------------------------------------------------------------------------------------------------------------------------------------------------------------------------------------------------------------------------------------------------------------------------------------------------------------------------------------------------------------------------------------------------------------------------------------------------------------------------------------------|
| G0:0016667 | oxidoreductase act | 20 of 6765 in the lis | 47 of 12752 in the genome  | 1 CCG002466. 1, CCG020414. 1, CCG006600. 1, CCG012992. 1, CCG027430. 1, CCG0006975. 1, CCG014330. 1, CCG022626. 1, CCG009090. 1, CCG018647. 1, CCG018446. 1, CCG015290. 1, CCG010836. 1, CCG006391. 1, CCG006571. 1, CCG010255. 1, CCG012875. 1, CCG014647. 1, CCG028418. 1, CCG001012. 1, CCG015680. 1, CCG016868. 1, CCG016162. 1, CCG025827. 1, CCG018923. 1, CCG005714. 1, CCG026500. 1, CCG002466. 1, CCG006600. 1, CCG012992. 1, CCG005714. 1, CCG026500. 1, CCG002466. 1, CCG006600. 1, CCG012992. 1, CCG013408. 2, CCG024032. 1, CCG024034. 1, CCG013420. 1 |
| G0:0003779 | actin binding      | 29 of 6765 in the lis | 66 of 12752 in the genome  | 1 CCG027151. 1, CCG016690. 1, CCG025596. 1, CCG003041. 1, CCG012716. 1, CCG023662. 1, CCG027921. 1                                                                                                                                                                                                                                                                                                                                                                                                                                                                  |
| G0:0003995 | acyl-CoA dehydroge | 12 of 6765 in the lis | 30 of 12752 in the genome  | 1 CCG023671. 2, CCG016956. 1                                                                                                                                                                                                                                                                                                                                                                                                                                                                                                                                        |
| G0:0004620 | phospholipase acti | 12 of 6765 in the lis | 30 of 12752 in the genome  | 1 CCG023671. 2, CCG016956. 1                                                                                                                                                                                                                                                                                                                                                                                                                                                                                                                                        |
| G0:0005507 | copper ion binding | 12 of 6765 in the lis | 30 of 12752 in the genome  | 1 CCG011525. 1, CCG026798. 1, CCG001579. 1, CCG011886. 1, CCG025707. 1, CCG015160. 1, CCG011044. 1, CCG022871. 1, CCG004124. 1, CCG009690. 1, CCG0006975. 1, CCG018647. 1, CCG002479. 1, CCG011041. 1, CCG014137. 1, CCG0006420. 1, CCG017420. 1, CCG002549. 1, CCG001243. 1, CCG013000. 1, CCG020661. 1, CCG002894. 1, CCG024798. 1, CCG005588. 1, CCG018253. 1, CCG007993. 1, CCG014379. 1, CCG026174. 1, CCG000016. 1, CCG013365. 1, CCG009860. 1, CCG022407. 1, CCG025439. 1                                                                                    |
| G0:0015035 | protein disulfide  | 11 of 6765 in the lis | 28 of 12752 in the genome  | 1 CCG009169. 1, CCG004122. 1, CCG010414. 1                                                                                                                                                                                                                                                                                                                                                                                                                                                                                                                          |
| G0:0015036 | disulfide oxidored | 11 of 6765 in the lis | 28 of 12752 in the genome  | 1 CCG020799. 1, CCG019470. 1, CCG015907. 1, CCG028235. 1, CCG005029. 1                                                                                                                                                                                                                                                                                                                                                                                                                                                                                              |
| G0:1901505 | carbohydrate deriv | 4 of 6765 in the list | 12 of 12752 in the genome  | 1 CCG006420. 1, CCG017420. 1, CCG002549. 1, CCG001243. 1, CCG013000. 1, CCG020661. 1, CCG002894. 1, CCG024798. 1, CCG005588. 1, CCG018253. 1, CCG007993. 1, CCG014379. 1, CCG026174. 1, CCG000016. 1, CCG013365. 1, CCG009860. 1, CCG022407. 1, CCG025439. 1                                                                                                                                                                                                                                                                                                        |
| G0:0005344 | oxygen transporter | 15 of 6765 in the lis | 37 of 12752 in the genome  | 1 CCG009169. 1, CCG004122. 1, CCG010414. 1                                                                                                                                                                                                                                                                                                                                                                                                                                                                                                                          |
| G0:0004983 | neuropeptide Y rec | 2 of 6765 in the list | 7 of 12752 in the genome   | 1 CCG020799. 1, CCG019470. 1, CCG015907. 1, CCG028235. 1, CCG005029. 1                                                                                                                                                                                                                                                                                                                                                                                                                                                                                              |
| G0:0015298 | solute:cation anti | 2 of 6765 in the list | 7 of 12752 in the genome   | 1 CCG006420. 1, CCG017420. 1, CCG002549. 1, CCG001243. 1, CCG013000. 1, CCG020661. 1, CCG002894. 1, CCG024798. 1, CCG005588. 1, CCG018253. 1, CCG007993. 1, CCG014379. 1, CCG026174. 1, CCG000016. 1, CCG013365. 1, CCG009860. 1, CCG022407. 1, CCG025439. 1                                                                                                                                                                                                                                                                                                        |
| G0:0015299 | solute:hydrogen an | 2 of 6765 in the list | 7 of 12752 in the genome   | 1 CCG009169. 1, CCG004122. 1, CCG010414. 1                                                                                                                                                                                                                                                                                                                                                                                                                                                                                                                          |
| G0:0005057 | receptor signaling | 6 of 6765 in the list | 17 of 12752 in the genome  | 1 CCG020799. 1, CCG019470. 1, CCG015907. 1, CCG028235. 1, CCG005029. 1                                                                                                                                                                                                                                                                                                                                                                                                                                                                                              |
| G0:0008234 | cysteine-type pept | 30 of 6765 in the lis | 69 of 12752 in the genome  | 1 CCG006420. 1, CCG017420. 1, CCG002549. 1, CCG001243. 1, CCG013000. 1, CCG020661. 1, CCG002894. 1, CCG024798. 1, CCG005588. 1, CCG018253. 1, CCG007993. 1, CCG014379. 1, CCG026174. 1, CCG000016. 1, CCG013365. 1, CCG009860. 1, CCG022407. 1, CCG025439. 1                                                                                                                                                                                                                                                                                                        |
| G0:0008092 | cytoskeletal prote | 39 of 6765 in the lis | 88 of 12752 in the genome  | 1 CCG009169. 1, CCG004122. 1, CCG010414. 1                                                                                                                                                                                                                                                                                                                                                                                                                                                                                                                          |
| G0:0019001 | guanyl nucleotide  | 134 of 6765 in the li | 279 of 12752 in the genome | 1 CCG020799. 1, CCG019470. 1, CCG015907. 1, CCG028235. 1, CCG005029. 1                                                                                                                                                                                                                                                                                                                                                                                                                                                                                              |
| G0:0016614 | oxidoreductase act | 56 of 6765 in the lis | 123 of 12752 in the genome | 1 CCG006420. 1, CCG017420. 1, CCG002549. 1, CCG001243. 1, CCG013000. 1, CCG020661. 1, CCG002894. 1, CCG024798. 1, CCG005588. 1, CCG018253. 1, CCG007993. 1, CCG014379. 1, CCG026174. 1, CCG000016. 1, CCG013365. 1, CCG009860. 1, CCG022407. 1, CCG025439. 1                                                                                                                                                                                                                                                                                                        |
| G0:0016849 | phosphorus-oxygen  | 8 of 6765 in the list | 22 of 12752 in the genome  | 1 CCG009169. 1, CCG004122. 1, CCG010414. 1                                                                                                                                                                                                                                                                                                                                                                                                                                                                                                                          |
| G0:0008483 | transaminase activ | 3 of 6765 in the list | 10 of 12752 in the genome  | 1 CCG020799. 1, CCG019470. 1, CCG015907. 1, CCG028235. 1, CCG005029. 1                                                                                                                                                                                                                                                                                                                                                                                                                                                                                              |
| G0:0015929 | hexosaminidase act | 3 of 6765 in the list | 10 of 12752 in the genome  | 1 CCG006420. 1, CCG017420. 1, CCG002549. 1, CCG001243. 1, CCG013000. 1, CCG020661. 1, CCG002894. 1, CCG024798. 1, CCG005588. 1, CCG018253. 1, CCG007993. 1, CCG014379. 1, CCG026174. 1, CCG000016. 1, CCG013365. 1, CCG009860. 1, CCG022407. 1, CCG025439. 1                                                                                                                                                                                                                                                                                                        |
| G0:0008745 | N-acetylmuramoyl-L | 5 of 6765 in the list | 15 of 12752 in the genome  | 1 CCG009169. 1, CCG004122. 1, CCG010414. 1                                                                                                                                                                                                                                                                                                                                                                                                                                                                                                                          |
| G0:0005525 | GTP binding        | 132 of 6765 in the li | 277 of 12752 in the genome | 1 CCG020799. 1, CCG019470. 1, CCG015907. 1, CCG028235. 1, CCG005029. 1                                                                                                                                                                                                                                                                                                                                                                                                                                                                                              |
| G0:0032561 | guanyl ribonucleot | 132 of 6765 in the li | 277 of 12752 in the genome | 1 CCG006420. 1, CCG017420. 1, CCG002549. 1, CCG001243. 1, CCG013000. 1, CCG020661. 1, CCG002894. 1, CCG024798. 1, CCG005588. 1, CCG018253. 1, CCG007993. 1, CCG014379. 1, CCG026174. 1, CCG000016. 1, CCG013365. 1, CCG009860. 1, CCG022407. 1, CCG025439. 1                                                                                                                                                                                                                                                                                                        |
| G0:0046983 | protein dimerizati | 19 of 6765 in the lis | 47 of 12752 in the genome  | 1 CCG009169. 1, CCG004122. 1, CCG010414. 1                                                                                                                                                                                                                                                                                                                                                                                                                                                                                                                          |
| G0:0010181 | FMN binding        | 4 of 6765 in the list | 13 of 12752 in the genome  | 1 CCG020799. 1, CCG019470. 1, CCG015907. 1, CCG028235. 1, CCG005029. 1                                                                                                                                                                                                                                                                                                                                                                                                                                                                                              |
| G0:0008199 | ferric iron bindin | 6 of 6765 in the list | 18 of 12752 in the genome  | 1 CCG006420. 1, CCG017420. 1, CCG002549. 1, CCG001243. 1, CCG013000. 1, CCG020661. 1, CCG002894. 1, CCG024798. 1, CCG005588. 1, CCG018253. 1, CCG007993. 1, CCG014379. 1, CCG026174. 1, CCG000016. 1, CCG013365. 1, CCG009860. 1, CCG022407. 1, CCG025439. 1                                                                                                                                                                                                                                                                                                        |
| G0:0005179 | hormone activity   | 8 of 6765 in the list | 23 of 12752 in the genome  | 1 CCG009169. 1, CCG004122. 1, CCG010414. 1                                                                                                                                                                                                                                                                                                                                                                                                                                                                                                                          |
| G0:0000975 | regulatory region  | 2 of 6765 in the list | 8 of 12752 in the genome   | 1 CCG020799. 1, CCG019470. 1, CCG015907. 1, CCG028235. 1, CCG005029. 1                                                                                                                                                                                                                                                                                                                                                                                                                                                                                              |
| G0:0001067 | regulatory region  | 2 of 6765 in the list | 8 of 12752 in the genome   | 1 CCG006420. 1, CCG017420. 1, CCG002549. 1, CCG001243. 1, CCG013000. 1, CCG020661. 1, CCG002894. 1, CCG024798. 1, CCG005588. 1, CCG018253. 1, CCG007993. 1, CCG014379. 1, CCG026174. 1, CCG000016. 1, CCG013365. 1, CCG009860. 1, CCG022407. 1, CCG025439. 1                                                                                                                                                                                                                                                                                                        |
| G0:0004383 | guanylate cyclase  | 2 of 6765 in the list | 8 of 12752 in the genome   | 1 CCG009169. 1, CCG004122. 1, CCG010414. 1                                                                                                                                                                                                                                                                                                                                                                                                                                                                                                                          |
| G0:0005048 | signal sequence bi | 2 of 6765 in the list | 8 of 12752 in the genome   | 1 CCG020799. 1, CCG019470. 1, CCG015907. 1, CCG028235. 1, CCG005029. 1                                                                                                                                                                                                                                                                                                                                                                                                                                                                                              |
| G0:0016846 | carbon-sulfur lyas | 2 of 6765 in the list | 8 of 12752 in the genome   | 1 CCG006420. 1, CCG017420. 1, CCG002549. 1, CCG001243. 1, CCG013000. 1, CCG020661. 1, CCG002894. 1, CCG024798. 1, CCG005588. 1, CCG018253. 1, CCG007993. 1, CCG014379. 1, CCG026174. 1, CCG000016. 1, CCG013365. 1, CCG009860. 1, CCG022407. 1, CCG025439. 1                                                                                                                                                                                                                                                                                                        |
| G0:0033218 | amide binding      | 2 of 6765 in the list | 8 of 12752 in the genome   | 1 CCG009169. 1, CCG004122. 1, CCG010414. 1                                                                                                                                                                                                                                                                                                                                                                                                                                                                                                                          |
| G0:0042277 | peptide binding    | 2 of 6765 in the list | 8 of 12752 in the genome   | 1 CCG020799. 1, CCG019470. 1, CCG015907. 1, CCG028235. 1, CCG005029. 1                                                                                                                                                                                                                                                                                                                                                                                                                                                                                              |
| G0:0044212 | transcription regu | 2 of 6765 in the list | 8 of 12752 in the genome   | 1 CCG006420. 1, CCG017420. 1, CCG002549. 1, CCG001243. 1, CCG013000. 1, CCG020661. 1, CCG002894. 1, CCG024798. 1, CCG005588. 1, CCG018253. 1, CCG007993. 1, CCG014379. 1, CCG026174. 1, CCG000016. 1, CCG013365. 1, CCG009860. 1, CCG022407. 1, CCG025439. 1                                                                                                                                                                                                                                                                                                        |
| G0:0016705 | oxidoreductase act | 152 of 6765 in the li | 319 of 12752 in the genome | 1 CCG009169. 1, CCG004122. 1, CCG010414. 1                                                                                                                                                                                                                                                                                                                                                                                                                                                                                                                          |
| G0:0001653 | peptide receptor a | 5 of 6765 in the list | 16 of 12752 in the genome  | 1 CCG020799. 1, CCG019470. 1, CCG015907. 1, CCG028235. 1, CCG005029. 1                                                                                                                                                                                                                                                                                                                                                                                                                                                                                              |

|            |                              |                         |                            |                                                                                                                                                                                                                                                                                                                                                                                                                                                                                                                                                                                                                                                               |
|------------|------------------------------|-------------------------|----------------------------|---------------------------------------------------------------------------------------------------------------------------------------------------------------------------------------------------------------------------------------------------------------------------------------------------------------------------------------------------------------------------------------------------------------------------------------------------------------------------------------------------------------------------------------------------------------------------------------------------------------------------------------------------------------|
| G0:0008528 | G-protein coupled            | 5 of 6765 in the list   | 16 of 12752 in the genome  | 1 CCG020659.1, CCG023662.1, CCG012684.1, CCG027921.1, CCG024066.1                                                                                                                                                                                                                                                                                                                                                                                                                                                                                                                                                                                             |
| G0:0003796 | lysozyme activity            | 3 of 6765 in the list   | 11 of 12752 in the genome  | 1 CCG016538.1, CCG021807.1, CCG010078.1                                                                                                                                                                                                                                                                                                                                                                                                                                                                                                                                                                                                                       |
| G0:0009975 | cyclase activity             | 3 of 6765 in the list   | 11 of 12752 in the genome  | 1 CCG013365.1, CCG026047.1, CCG026898.1                                                                                                                                                                                                                                                                                                                                                                                                                                                                                                                                                                                                                       |
| G0:0003723 | RNA binding                  | 234 of 6765 in the list | 482 of 12752 in the genome | 1 CCG024556.1, CCG027737.1, CCG004807.1, CCG014526.1, CCG021944.1, CCG017635.1, CCG017633.1, CCG012202.1, CCG003722.1, CCG000520.1, CCG014539.1, CCG005113.1, CCG004025.1, CCG025139.1, CCG021652.1, CCG014539.1, CCG005113.1, CCG004025.1, CCG025139.1, CCG021652.1, CCG004308.1, CCG006469.1, CCG017693.1, CCG026314.1, CCG004309.1, CCG011972.1, CCG016153.1, CCG010077.1, CCG015090.1, CCG010728.1, CCG017635.1, CCG017633.1, CCG012202.1, CCG003722.1, CCG000520.1, CCG008741.1, CCG013329.1, CCG010197.1, CCG008742.1, CCG010279.1, CCG014539.1, CCG021652.1, CCG021962.1, CCG023147.1, CCG003703.1, CCG015160.1, CCG018692.1, CCG002834.1, CCG004124.1 |
| G0:0020037 | heme binding                 | 141 of 6765 in the list | 298 of 12752 in the genome | 1 CCG006469.1, CCG019647.1, CCG019191.1, CCG006587.2, CCG006588.2, CCG007496.1, CCG011299.1                                                                                                                                                                                                                                                                                                                                                                                                                                                                                                                                                                   |
| G0:0030414 | peptidase inhibitor          | 29 of 6765 in the list  | 70 of 12752 in the genome  | 1 CCG017477.1, CCG006770.1                                                                                                                                                                                                                                                                                                                                                                                                                                                                                                                                                                                                                                    |
| G0:0061134 | peptidase regulator          | 29 of 6765 in the list  | 70 of 12752 in the genome  | 1 CCG004760.1, CCG025015.2                                                                                                                                                                                                                                                                                                                                                                                                                                                                                                                                                                                                                                    |
| G0:0015079 | potassium ion transporter    | 21 of 6765 in the list  | 53 of 12752 in the genome  | 1 CCG011172.1, CCG003386.1                                                                                                                                                                                                                                                                                                                                                                                                                                                                                                                                                                                                                                    |
| G0:0008061 | chitin binding               | 56 of 6765 in the list  | 127 of 12752 in the genome | 1 CCG011839.1, CCG009756.1                                                                                                                                                                                                                                                                                                                                                                                                                                                                                                                                                                                                                                    |
| G0:0046906 | tetrapyrrole binding         | 141 of 6765 in the list | 299 of 12752 in the genome | 1 CCG011990.4, CCG003882.1, CCG004293.1, CCG018968.1, CCG006908.1, CCG011525.1, CCG011886.1, CCG025707.1                                                                                                                                                                                                                                                                                                                                                                                                                                                                                                                                                      |
| G0:0005496 | steroid binding              | 6 of 6765 in the list   | 19 of 12752 in the genome  | 1 CCG022273.1, CCG027962.1, CCG017295.1                                                                                                                                                                                                                                                                                                                                                                                                                                                                                                                                                                                                                       |
| G0:0004867 | serine-type endopeptidase    | 20 of 6765 in the list  | 51 of 12752 in the genome  | 1 CCG011932.1, CCG013032.1, CCG027229.1, CCG017693.1, CCG010159.1, CCG011932.1, CCG013032.1, CCG027229.1, CCG017693.1, CCG010159.1, CCG009674.1, CCG022868.1, CCG028131.1, CCG008900.1, CCG008902.1                                                                                                                                                                                                                                                                                                                                                                                                                                                           |
| G0:0004198 | calcium-dependent            | 4 of 6765 in the list   | 14 of 12752 in the genome  | 1 CCG020661.1, CCG024798.1, CCG002113.1, CCG019263.1, CCG005588.1, CCG008900.1, CCG008902.1                                                                                                                                                                                                                                                                                                                                                                                                                                                                                                                                                                   |
| G0:0005267 | potassium channel            | 17 of 6765 in the list  | 45 of 12752 in the genome  | 1 CCG005524.1, CCG004268.1, CCG018917.1, CCG023964.1, CCG021879.1, CCG014539.1, CCG005113.1, CCG004025.1, CCG021652.1, CCG021962.1, CCG014539.1, CCG005113.1, CCG004025.1, CCG021652.1, CCG021962.1, CCG005307.1, CCG011932.1, CCG024345.1, CCG010159.1, CCG014880.1, CCG021825.3, CCG007496.1, CCG011299.1                                                                                                                                                                                                                                                                                                                                                   |
| G0:0003840 | gamma-glutamyl transporter   | 2 of 6765 in the list   | 9 of 12752 in the genome   | 1 CCG013329.1, CCG010197.1, CCG010279.1, CCG011183.1                                                                                                                                                                                                                                                                                                                                                                                                                                                                                                                                                                                                          |
| G0:0005247 | voltage-gated channel        | 2 of 6765 in the list   | 9 of 12752 in the genome   | 1 CCG013329.1, CCG010197.1, CCG010279.1, CCG011183.1                                                                                                                                                                                                                                                                                                                                                                                                                                                                                                                                                                                                          |
| G0:0005516 | calmodulin binding           | 2 of 6765 in the list   | 9 of 12752 in the genome   | 1 CCG004308.1, CCG010710.1, CCG017693.1, CCG023060.1, CCG026314.1, CCG025568.1, CCG014156.1, CCG027182.1, CCG016864.1, CCG005277.1, CCG024271.1, CCG022266.1, CCG015241.1, CCG005895.1, CCG009458.1, CCG0008237                                                                                                                                                                                                                                                                                                                                                                                                                                               |
| G0:0005544 | calcium-dependent            | 2 of 6765 in the list   | 9 of 12752 in the genome   | 1 CCG0008237                                                                                                                                                                                                                                                                                                                                                                                                                                                                                                                                                                                                                                                  |
| G0:0016840 | carbon-nitrogen lyase        | 2 of 6765 in the list   | 9 of 12752 in the genome   |                                                                                                                                                                                                                                                                                                                                                                                                                                                                                                                                                                                                                                                               |
| G0:0008237 | metallopeptidase             | 104 of 6765 in the list | 227 of 12752 in the genome |                                                                                                                                                                                                                                                                                                                                                                                                                                                                                                                                                                                                                                                               |
| G0:0004702 | receptor signaling           | 3 of 6765 in the list   | 12 of 12752 in the genome  |                                                                                                                                                                                                                                                                                                                                                                                                                                                                                                                                                                                                                                                               |
| G0:0016814 | hydrolase activity           | 3 of 6765 in the list   | 12 of 12752 in the genome  |                                                                                                                                                                                                                                                                                                                                                                                                                                                                                                                                                                                                                                                               |
| G0:0022890 | inorganic cation transporter | 125 of 6765 in the list | 270 of 12752 in the genome |                                                                                                                                                                                                                                                                                                                                                                                                                                                                                                                                                                                                                                                               |
| G0:0015077 | monovalent inorganic         | 107 of 6765 in the list | 235 of 12752 in the genome |                                                                                                                                                                                                                                                                                                                                                                                                                                                                                                                                                                                                                                                               |
| G0:0050661 | NADP binding                 | 5 of 6765 in the list   | 18 of 12752 in the genome  |                                                                                                                                                                                                                                                                                                                                                                                                                                                                                                                                                                                                                                                               |
| G0:0016616 | oxidoreductase               | 28 of 6765 in the list  | 71 of 12752 in the genome  |                                                                                                                                                                                                                                                                                                                                                                                                                                                                                                                                                                                                                                                               |
| G0:0016709 | oxidoreductase               | 2 of 6765 in the list   | 10 of 12752 in the genome  |                                                                                                                                                                                                                                                                                                                                                                                                                                                                                                                                                                                                                                                               |
| G0:0004540 | ribonuclease                 | 36 of 6765 in the list  | 90 of 12752 in the genome  |                                                                                                                                                                                                                                                                                                                                                                                                                                                                                                                                                                                                                                                               |
| G0:0004866 | endopeptidase inhibitor      | 23 of 6765 in the list  | 62 of 12752 in the genome  |                                                                                                                                                                                                                                                                                                                                                                                                                                                                                                                                                                                                                                                               |
| G0:0061135 | endopeptidase regulator      | 23 of 6765 in the list  | 62 of 12752 in the genome  |                                                                                                                                                                                                                                                                                                                                                                                                                                                                                                                                                                                                                                                               |
| G0:0005215 | transporter                  | 439 of 6765 in the list | 899 of 12752 in the genome |                                                                                                                                                                                                                                                                                                                                                                                                                                                                                                                                                                                                                                                               |
| G0:0016755 | transferase                  | 3 of 6765 in the list   | 14 of 12752 in the genome  |                                                                                                                                                                                                                                                                                                                                                                                                                                                                                                                                                                                                                                                               |
| G0:0032934 | sterol binding               | 4 of 6765 in the list   | 17 of 12752 in the genome  |                                                                                                                                                                                                                                                                                                                                                                                                                                                                                                                                                                                                                                                               |
| G0:0043178 | alcohol binding              | 4 of 6765 in the list   | 17 of 12752 in the genome  |                                                                                                                                                                                                                                                                                                                                                                                                                                                                                                                                                                                                                                                               |
| G0:0015081 | sodium ion transporter       | 43 of 6765 in the list  | 107 of 12752 in the genome |                                                                                                                                                                                                                                                                                                                                                                                                                                                                                                                                                                                                                                                               |
| G0:0022843 | voltage-gated channel        | 13 of 6765 in the list  | 40 of 12752 in the genome  |                                                                                                                                                                                                                                                                                                                                                                                                                                                                                                                                                                                                                                                               |
| G0:0001071 | nucleic acid binding         | 124 of 6765 in the list | 279 of 12752 in the genome |                                                                                                                                                                                                                                                                                                                                                                                                                                                                                                                                                                                                                                                               |



|            |                     |                    |                        |        |
|------------|---------------------|--------------------|------------------------|--------|
| G0:0022838 | substrate-specific  | 81 of 6765 in the  | lis242 of 12752 in the | genome |
| G0:0004871 | signal transducer   | 100 of 6765 in the | li345 of 12752 in the  | genome |
| G0:0060089 | molecular transduc  | 100 of 6765 in the | li345 of 12752 in the  | genome |
| G0:0034061 | DNA polymerase act  | 61 of 6765 in the  | lis223 of 12752 in the | genome |
| G0:0003964 | RNA-directed DNA p  | 36 of 6765 in the  | lis196 of 12752 in the | genome |
| G0:0004872 | receptor activity   | 81 of 6765 in the  | lis311 of 12752 in the | genome |
| G0:0004252 | serine-type endope  | 182 of 6765 in the | li493 of 12752 in the  | genome |
| G0:0038023 | signaling receptor  | 71 of 6765 in the  | lis292 of 12752 in the | genome |
| G0:0005198 | structural molecul  | 176 of 6765 in the | li543 of 12752 in the  | genome |
| G0:0008236 | serine-type peptid  | 195 of 6765 in the | li529 of 12752 in the  | genome |
| G0:0017171 | serine hydrolase a  | 195 of 6765 in the | li529 of 12752 in the  | genome |
| G0:0042302 | structural constit  | 63 of 6765 in the  | lis257 of 12752 in the | genome |
| G0:0004175 | endopeptidase acti  | 256 of 6765 in the | li727 of 12752 in the  | genome |
| G0:0004888 | transmembrane sign  | 51 of 6765 in the  | lis259 of 12752 in the | genome |
| G0:0004970 | ionotropic glutama  | 9 of 6765 in the   | list70 of 12752 in the | genome |
| G0:0004984 | olfactory receptor  | 4 of 6765 in the   | list93 of 12752 in the | genome |
| G0:0005231 | excitatory extracel | 11 of 6765 in the  | lis73 of 12752 in the  | genome |
| G0:0005234 | extracellular-glut  | 9 of 6765 in the   | list70 of 12752 in the | genome |
| G0:0005549 | odorant binding     | 31 of 6765 in the  | lis247 of 12752 in the | genome |
| G0:0008066 | glutamate receptor  | 9 of 6765 in the   | list70 of 12752 in the | genome |
| G0:0008233 | peptidase activity  | 360 of 6765 in the | li932 of 12752 in the  | genome |
| G0:0070011 | peptidase activity  | 350 of 6765 in the | li906 of 12752 in the  | genome |

1 CCG007640. 1, CCG008803. 1, CCG001584. 1, CCG013634. 1, CCG007954. 1, CCG  
1 CCG019737. 1, CCG008803. 1, CCG024271. 1, CCG001584. 1, CCG026798. 1, CCG  
1 CCG019737. 1, CCG008803. 1, CCG024271. 1, CCG001584. 1, CCG026798. 1, CCG  
1 CCG005276. 1, CCG021295. 1, CCG013722. 1, CCG021759. 1, CCG004438. 1, CCG  
1 CCG005276. 1, CCG008044. 1, CCG007710. 1, CCG013065. 1, CCG005501. 1, CCG  
1 CCG008803. 1, CCG024271. 1, CCG001584. 1, CCG006802. 1, CCG020978. 1, CCG  
1 CCG006922. 1, CCG015935. 1, CCG003695. 1, CCG023235. 1, CCG006912. 1, CCG  
1 CCG008803. 1, CCG024271. 1, CCG001584. 1, CCG006802. 1, CCG020978. 1, CCG  
1 CCG014531. 2, CCG006420. 1, CCG002727. 1, CCG012027. 1, CCG013430. 1, CCG  
1 CCG006922. 1, CCG015935. 1, CCG003695. 1, CCG023235. 1, CCG006912. 1, CCG  
1 CCG006922. 1, CCG015935. 1, CCG003695. 1, CCG023235. 1, CCG006912. 1, CCG  
1 CCG028114. 1, CCG002727. 1, CCG019605. 1, CCG010041. 1, CCG012027. 1, CCG  
1 CCG006922. 1, CCG003882. 1, CCG023235. 1, CCG006912. 1, CCG015867. 1, CCG  
1 CCG016857. 1, CCG008803. 1, CCG001584. 1, CCG006802. 1, CCG020978. 1, CCG  
1 CCG021738. 1, CCG004844. 1, CCG026077. 1, CCG008803. 1, CCG024431. 1, CCG  
1 CCG020881. 1, CCG017217. 3, CCG006802. 1, CCG011758. 1  
1 CCG008803. 1, CCG001584. 1, CCG018661. 1, CCG022168. 1, CCG021686. 1, CCG  
1 CCG021738. 1, CCG004844. 1, CCG026077. 1, CCG008803. 1, CCG024431. 1, CCG  
1 CCG028521. 2, CCG006802. 1, CCG001999. 1, CCG011758. 1, CCG011804. 1, CCG  
1 CCG021738. 1, CCG004844. 1, CCG026077. 1, CCG008803. 1, CCG024431. 1, CCG  
1 CCG011990. 4, CCG006922. 1, CCG003882. 1, CCG005931. 1, CCG023235. 1, CCG  
1 CCG011990. 4, CCG006922. 1, CCG003882. 1, CCG005931. 1, CCG023235. 1, CCG

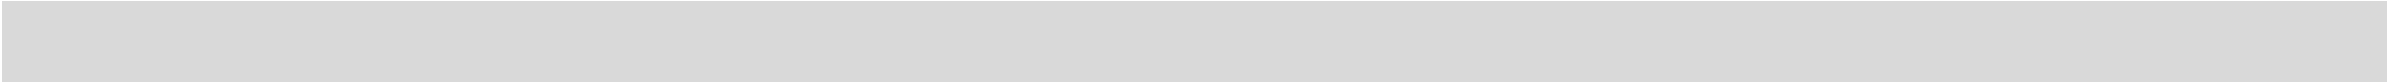



















































































































































































































































22869. 1, CCG011108. 1, CCG015151. 1, CCG027208. 2, CCG005485. 1, CCG013365. 1, CCG027551. 3, CCG010867. 1, CCG028075. 1, CCG015577. 3, CCG024514. 1, CCG023317. 1, CCG016034. 1, CCG001899.

G011390. 1, CCG011391. 2, CCG020637. 1, CCG022471. 1, CCG021250. 1, CCG001847. 1, CCG012678. 1, CCG004595. 1, CCG005714. 1, CCG026500. 1, CCG003110. 1, CCG022463. 1, CCG020472. 1, CCG009674. 1, CCG012144. 2, CCG009641. 1, CCG002479. 1, CCG017863. 3, CCG011003. 1, CCG003708. 1, CCG011041. 1, CCG014137. 1, CCG016992. 2, CCG014318. 1, CCG019356. 1, CCG003735. 1, CCG009089. 1, CCG022801. 1, CCG015293. 1, CCG012576. 1, CCG025521. 1, CCG018851. 1, CCG015331. 1, CCG018444. 1, CCG018445. 1, CCG008603. 1, CCG010257. 1, CCG025387. 1, CCG015351. 1, CCG019697. 2, CCG026695. 1, CCG024092. 1, CCG024433. 1, CCG021396. 1, CCG018055. 1, CCG024665. 1, CCG012949. 1, CCG019315. 1, CCG011327. 1, CCG027430. 1, CCG020472. 1, CCG021250. 1, CCG020637. 1, CCG001847. 1, CCG012678. 1, CCG027430. 1, CCG020472. 1, CCG021250. 1, CCG020637. 1, CCG001847. 1, CCG012678. 1

G011780. 1, CCG014880. 1, CCG025595. 1, CCG027905. 1, CCG023660. 1, CCG014878. 1, CCG011778. 1, CCG003040. 1, CCG027149. 1, CCG012718. 1

G019420. 2, CCG005418. 1, CCG009015. 1, CCG027392. 1, CCG018585. 3, CCG027145. 1, CCG021664. 1, CCG024631. 1, CCG001011. 2, CCG025300. 1, CCG018248. 1, CCG009405. 1, CCG020090. 1, CCG017233. 1, CCG022641. 1, CCG012169. 1, CCG019356. 1, CCG009089. 1, CCG015908. 2, CCG011018. 1, CCG000469. 1, CCG018632. 1, CCG005579. 1, CCG014817. 2, CCG022820. 1, CCG024028. 1, CCG011262. 1, CCG014330. 1, CCG022620. 1, CCG025456. 1, CCG028124. 1, CCG007667. 1, CCG005370. 1, CCG017657. 1, CCG024327. 1, CCG015386. 1, CCG019020. 1, CCG027802. 1, CCG002696. 1, CCG009607. 1, CCG011006. 1, CCG009360. 1, CCG016370. 1, CCG018255. 1, CCG012770. 1, CCG014455. 1, CCG000391. 1, CCG011769. 1, CCG020913. 1, CCG016586. 1, CCG009084. 2, CCG018640. 1, CCG014070. 1, CCG012771. 1, CCG008931. 1, CCG019112. 1, CCG018289. 1, CCG026047. 1, CCG026898. 1, CCG010944. 1

G025456. 1, CCG028124. 1, CCG007667. 1, CCG005370. 1, CCG017657. 1, CCG024327. 1, CCG015386. 1, CCG019020. 1, CCG027802. 1, CCG002696. 1, CCG009607. 1, CCG011006. 1, CCG009360. 1, CCG016370. 1, CCG025456. 1, CCG028124. 1, CCG007667. 1, CCG005370. 1, CCG017657. 1, CCG024327. 1, CCG015386. 1, CCG019020. 1, CCG027802. 1, CCG002696. 1, CCG009607. 1, CCG011006. 1, CCG009360. 1, CCG016370. 1, CCG026694. 1, CCG027427. 1, CCG003112. 1, CCG012792. 1, CCG014463. 1, CCG012958. 1, CCG000436. 1, CCG016859. 1, CCG011760. 1, CCG002470. 1, CCG021456. 1, CCG027186. 1, CCG018847. 1, CCG004920. 1

G020377. 1, CCG017791. 1, CCG000501. 1, CCG024248. 1

G014901. 1, CCG018055. 1, CCG008690. 1, CCG015926. 1, CCG013359. 3, CCG019181. 1, CCG019182. 1, CCG003729. 1, CCG015758. 1, CCG009904. 1, CCG015449. 1, CCG007747. 1, CCG006639. 1, CCG012578. 1

G007710. 1, CCG024072. 1, CCG004820. 1, CCG005887. 1, CCG025144. 1, CCG002143. 1, CCG024363. 1, CCG020685. 1, CCG007914. 1, CCG005171. 1, CCG004468. 1, CCG026595. 1, CCG022811. 1, CCG01363  
G014901. 1, CCG004083. 1, CCG015926. 1, CCG013359. 3, CCG019181. 1, CCG023349. 1, CCG019182. 1, CCG003729. 1, CCG015758. 1, CCG015449. 1, CCG006027. 1, CCG007747. 1, CCG008724. 1, CCG00663  
G021962. 1, CCG023147. 1, CCG003703. 1, CCG025560. 1, CCG008364. 1, CCG021961. 1, CCG002170. 1, CCG002228. 1, CCG011089. 1, CCG021651. 1, CCG001347. 1, CCG003758. 1, CCG012779. 1, CCG01643  
G021962. 1, CCG023147. 1, CCG003703. 1, CCG025560. 1, CCG008364. 1, CCG021961. 1, CCG002170. 1, CCG002228. 1, CCG011089. 1, CCG021651. 1, CCG001347. 1, CCG003758. 1, CCG012779. 1, CCG01643  
G019647. 1, CCG019191. 1, CCG006587. 2, CCG006588. 2, CCG019190. 1, CCG000991. 1, CCG014156. 1, CCG027182. 1, CCG016864. 1, CCG008587. 1, CCG002559. 1, CCG023530. 2, CCG001964. 1, CCG01400  
G006912. 1, CCG019402. 1, CCG017730. 1, CCG005809. 1, CCG021005. 1, CCG022227. 1, CCG017862. 1, CCG023926. 1, CCG012725. 1, CCG001154. 1, CCG019785. 1, CCG016069. 1, CCG023924. 1, CCG00781  
G014901. 1, CCG004083. 1, CCG015926. 1, CCG013359. 3, CCG019181. 1, CCG023349. 1, CCG019182. 1, CCG003729. 1, CCG015758. 1, CCG015449. 1, CCG006027. 1, CCG007747. 1, CCG008724. 1, CCG00663  
G011183. 1  
G021961. 1, CCG002228. 1, CCG011089. 1, CCG021651. 1, CCG001347. 1, CCG003758. 1, CCG012779. 1, CCG016437. 1, CCG016011. 1, CCG024998. 1, CCG011387. 1, CCG016436. 1, CCG014258. 1, CCG01601  
  
G019190. 1, CCG000991. 1, CCG014156. 1, CCG027182. 1, CCG016864. 1, CCG008587. 1, CCG002559. 1, CCG023530. 2, CCG001964. 1, CCG014000. 1, CCG019890. 1, CCG027184. 1  
  
  
  
  
  
G005931. 1, CCG021004. 1, CCG016849. 1, CCG008099. 1, CCG003027. 1, CCG010526. 1, CCG007306. 1, CCG028016. 1, CCG004986. 1, CCG022621. 1, CCG014045. 1, CCG020231. 1, CCG015843. 1, CCG01728  
  
  
G023060. 1, CCG006864. 1, CCG010623. 2, CCG015823. 1, CCG007954. 1, CCG004086. 1, CCG000585. 1, CCG004309. 1, CCG016128. 1, CCG006587. 2, CCG028141. 1, CCG016245. 1, CCG025989. 2, CCG00842  
G023060. 1, CCG006864. 1, CCG007954. 1, CCG004086. 1, CCG000585. 1, CCG004309. 1, CCG016128. 1, CCG006587. 2, CCG028141. 1, CCG016245. 1, CCG025989. 2, CCG008422. 1, CCG020879. 1, CCG02775  
  
  
G025307. 1, CCG019857. 1, CCG022869. 1, CCG000948. 1, CCG004916. 1, CCG022025. 2, CCG016586. 1, CCG009084. 2, CCG018640. 1, CCG014070. 1, CCG008931. 1, CCG019112. 1, CCG018289. 1, CCG02704  
  
  
G020635. 1, CCG007690. 1, CCG013865. 1, CCG020685. 1, CCG011652. 1, CCG007636. 1, CCG023173. 1, CCG001317. 1, CCG012895. 1, CCG007902. 1, CCG004448. 2, CCG001040. 1, CCG004228. 1, CCG01831  
G023147. 1, CCG003703. 1, CCG021961. 1, CCG002228. 1, CCG011089. 1, CCG021651. 1, CCG001347. 1, CCG003758. 1, CCG012779. 1, CCG016437. 1, CCG016011. 1, CCG023881. 1, CCG024998. 1, CCG01138  
G023147. 1, CCG003703. 1, CCG021961. 1, CCG002228. 1, CCG011089. 1, CCG021651. 1, CCG001347. 1, CCG003758. 1, CCG012779. 1, CCG016437. 1, CCG016011. 1, CCG023881. 1, CCG024998. 1, CCG01138  
G010623. 2, CCG003545. 1, CCG021740. 1, CCG004086. 1, CCG021738. 1, CCG000585. 1, CCG000205. 1, CCG003991. 1, CCG000300. 1, CCG020879. 1, CCG003878. 1, CCG027758. 1, CCG019768. 1, CCG02279  
  
  
  
  
  
G023980. 1, CCG007954. 1, CCG004086. 1, CCG027718. 1, CCG004309. 1, CCG016128. 1, CCG028141. 1, CCG016245. 1, CCG027758. 1, CCG024383. 1, CCG026707. 1, CCG022789. 1, CCG017552. 1, CCG01695  
G015914. 1, CCG014448. 1, CCG002559. 1, CCG023530. 2, CCG019647. 1, CCG006587. 2, CCG006588. 2, CCG027184. 1  
G022496. 1, CCG001799. 1, CCG008741. 1, CCG017795. 1, CCG018346. 1, CCG027427. 1, CCG023860. 1, CCG012958. 1, CCG007493. 1, CCG011229. 1, CCG020586. 1, CCG001431. 2, CCG020224. 1, CCG00134

G022496. 1, CCG001799. 1, CCG008741. 1, CCG017795. 1, CCG018346. 1, CCG027427. 1, CCG023860. 1, CCG012958. 1, CCG007493. 1, CCG011229. 1, CCG020586. 1, CCG001431. 2, CCG020224. 1, CCG001341. 1, CCG023530. 2, CCG006587. 2, CCG006588. 2, CCG027184. 1  
G006587. 2, CCG006588. 2, CCG014156. 1, CCG027182. 1, CCG016864. 1, CCG005277. 1, CCG015914. 1, CCG014448. 1, CCG013013. 1, CCG002559. 1, CCG026240. 1, CCG023530. 2, CCG027184. 1  
G006587. 2, CCG006588. 2, CCG014156. 1, CCG027182. 1, CCG016864. 1, CCG005277. 1, CCG015914. 1, CCG014448. 1, CCG013013. 1, CCG002559. 1, CCG026240. 1, CCG023530. 2, CCG027184. 1  
G027921. 1, CCG004238. 1, CCG020659. 1, CCG019721. 1, CCG000077. 1, CCG009553. 1, CCG012684. 1, CCG018930. 1, CCG024664. 1, CCG000078. 1, CCG024066. 1  
G023270. 1  
G023270. 1  
G004086. 1, CCG004309. 1, CCG016128. 1, CCG006587. 2, CCG028141. 1, CCG016245. 1, CCG003878. 1, CCG027758. 1, CCG005277. 1, CCG017552. 1, CCG014448. 1, CCG027154. 1, CCG013708. 1, CCG005490. 1, CCG000520. 1, CCG014901. 1, CCG015926. 1, CCG013359. 3, CCG006605. 1, CCG019181. 1, CCG019182. 1, CCG003729. 1, CCG005714. 1, CCG015758. 1, CCG017614. 1, CCG010284. 1, CCG015449. 1, CCG007747. 1, CCG007349. 1, CCG006912. 1, CCG000746. 1, CCG007306. 1, CCG016913. 1, CCG012875. 1, CCG027802. 1, CCG028016. 1, CCG008705. 1, CCG023989. 1, CCG019308. 1, CCG004020. 1, CCG015082. 1, CCG009839. 1, CCG009557. 1, CCG020909. 1, CCG004378. 1, CCG017591. 1, CCG020444. 1, CCG009221. 1, CCG010139. 1  
G014901. 1, CCG015926. 1, CCG013359. 3, CCG008826. 1, CCG019181. 1, CCG019182. 1, CCG003729. 1, CCG015758. 1, CCG015449. 1, CCG007747. 1, CCG006639. 1, CCG002836. 1, CCG012578. 1, CCG020377. 1, CCG004744. 1, CCG000979. 1, CCG016127. 1, CCG005395. 1, CCG004268. 1, CCG025658. 1, CCG021444. 1, CCG005481. 1, CCG021879. 1, CCG027501. 1, CCG013865. 1, CCG009393. 1, CCG020685. 1, CCG011652. 1, CCG006864. 1, CCG010623. 2, CCG003545. 1, CCG015823. 1, CCG021740. 1, CCG004086. 1, CCG021738. 1, CCG000585. 1, CCG016128. 1, CCG006587. 2, CCG028141. 1, CCG016245. 1, CCG025989. 2, CCG020879. 1, CCG021740. 1, CCG004086. 1, CCG021738. 1, CCG000585. 1, CCG020879. 1, CCG003878. 1, CCG027758. 1, CCG022794. 1, CCG024905. 1, CCG014382. 1, CCG017614. 1, CCG016326. 1, CCG013708. 1, CCG023583. 1, CCG005895. 1, CCG009458. 1, CCG022496. 1, CCG001799. 1, CCG008741. 1, CCG018346. 1, CCG027427. 1, CCG023860. 1, CCG012958. 1, CCG007493. 1, CCG001431. 2, CCG020224. 1, CCG000226. 1, CCG001341. 1, CCG021740. 1, CCG004086. 1, CCG021738. 1, CCG000585. 1, CCG020879. 1, CCG003878. 1, CCG027758. 1, CCG019768. 1, CCG022794. 1, CCG014382. 1, CCG017614. 1, CCG016326. 1, CCG013708. 1, CCG023583. 1, CCG006864. 1, CCG010623. 2, CCG003545. 1, CCG015823. 1, CCG021740. 1, CCG004086. 1, CCG021738. 1, CCG000585. 1, CCG016128. 1, CCG006587. 2, CCG028141. 1, CCG016245. 1, CCG025989. 2, CCG020879. 1, CCG019191. 1, CCG006587. 2, CCG006588. 2, CCG000991. 1, CCG003867. 1, CCG014156. 1, CCG005277. 1, CCG015914. 1, CCG018801. 1, CCG014448. 1, CCG003712. 1, CCG014000. 1, CCG027756. 1, CCG005490. 1, CCG007710. 1, CCG005501. 1, CCG005846. 1, CCG009134. 1, CCG003161. 1, CCG011129. 1, CCG004534. 1, CCG018507. 1, CCG015039. 1, CCG004224. 1, CCG004468. 1, CCG000489. 1, CCG022811. 1, CCG003161. 1, CCG022168. 1, CCG006803. 1, CCG026796. 1, CCG027585. 1, CCG021738. 1, CCG002839. 1, CCG004844. 1, CCG024431. 1, CCG006587. 2, CCG006588. 2, CCG010415. 1, CCG027182. 1, CCG018661. 1, CCG001145. 1, CCG022168. 1, CCG006803. 1, CCG026796. 1, CCG027585. 1, CCG021738. 1, CCG002839. 1, CCG004844. 1, CCG024431. 1, CCG006587. 2, CCG006588. 2, CCG010415. 1, CCG027182. 1, CCG018661. 1, CCG001145. 1, CCG004268. 1, CCG025658. 1, CCG021444. 1, CCG021879. 1, CCG013865. 1, CCG009393. 1, CCG020685. 1, CCG011652. 1, CCG024425. 1, CCG019674. 1, CCG000583. 2, CCG020686. 1, CCG023129. 1, CCG007902. 1, CCG007116. 1, CCG021004. 1, CCG016849. 1, CCG008099. 1, CCG010526. 1, CCG008089. 1, CCG019076. 1, CCG022450. 1, CCG028535. 1, CCG015843. 1, CCG002163. 1, CCG018713. 1, CCG016175. 1, CCG003981. 1, CCG004086. 1, CCG007954. 1, CCG015653. 1, CCG005496. 1, CCG027756. 1  
G025658. 1, CCG021444. 1, CCG021879. 1, CCG013865. 1, CCG020685. 1, CCG011652. 1, CCG024425. 1, CCG016030. 1, CCG019674. 1, CCG020686. 1, CCG004076. 1, CCG023129. 1, CCG007902. 1, CCG012891. 1, CCG027114. 1, CCG022792. 1  
G027114. 1, CCG022792. 1  
G004268. 1, CCG021444. 1, CCG021879. 1, CCG013865. 1, CCG020685. 1, CCG011652. 1, CCG024425. 1, CCG019674. 1, CCG020686. 1, CCG023129. 1, CCG007902. 1, CCG012895. 1  
G006770. 1, CCG021738. 1, CCG002839. 1, CCG004844. 1, CCG024431. 1, CCG019191. 1, CCG006587. 2, CCG006588. 2, CCG010415. 1, CCG000991. 1, CCG014156. 1, CCG001145. 1, CCG005277. 1, CCG021686. 1, CCG006770. 1, CCG021738. 1, CCG002839. 1, CCG004844. 1, CCG024431. 1, CCG019191. 1, CCG006587. 2, CCG006588. 2, CCG010415. 1, CCG000991. 1, CCG014156. 1, CCG001145. 1, CCG005277. 1, CCG021686. 1, CCG022168. 1, CCG006803. 1, CCG021738. 1, CCG002839. 1, CCG004844. 1, CCG024431. 1, CCG010415. 1, CCG018661. 1, CCG001145. 1, CCG013635. 1, CCG021686. 1, CCG014158. 1, CCG011730. 1, CCG018801. 1, CCG004268. 1, CCG021444. 1, CCG007902. 1, CCG012895. 1, CCG021879. 1  
G007256. 1, CCG003437. 1, CCG004104. 1, CCG004909. 1, CCG003471. 1, CCG016139. 1, CCG026048. 1, CCG002354. 1, CCG010112. 1, CCG019398. 1, CCG006876. 1, CCG007396. 1, CCG003573. 1, CCG016378. 1, CCG004086. 1, CCG021738. 1, CCG006587. 2, CCG003867. 1, CCG005277. 1, CCG000272. 1, CCG000723. 1, CCG018801. 1, CCG014448. 1, CCG000118. 1, CCG003712. 1, CCG005496. 1, CCG027184. 1, CCG015640. 1, CCG004086. 1, CCG021738. 1, CCG006587. 2, CCG003867. 1, CCG005277. 1, CCG000272. 1, CCG000723. 1, CCG018801. 1, CCG014448. 1, CCG000118. 1, CCG003712. 1, CCG005496. 1, CCG027184. 1, CCG015640. 1, CCG004086. 1, CCG021738. 1, CCG006587. 2, CCG003867. 1, CCG005277. 1, CCG000272. 1, CCG000723. 1, CCG018801. 1, CCG014448. 1, CCG000118. 1, CCG003712. 1, CCG005496. 1, CCG027184. 1, CCG015640. 1

3004086. 1, CCG021738. 1, CCG006587. 2, CCG003867. 1, CCG005277. 1, CCG000272. 1, CCG000723. 1, CCG018801. 1, CCG014448. 1, CCG000118. 1, CCG003712. 1, CCG005496. 1, CCG027184. 1, CCG015640  
3006802. 1, CCG020978. 1, CCG011453. 1, CCG008741. 1, CCG021738. 1, CCG009446. 1, CCG017795. 1, CCG008939. 1, CCG020785. 1, CCG011229. 1, CCG018200. 1, CCG020586. 1, CCG025707. 1, CCG019427  
3006802. 1, CCG020978. 1, CCG011453. 1, CCG008741. 1, CCG021738. 1, CCG009446. 1, CCG017795. 1, CCG008939. 1, CCG020785. 1, CCG011229. 1, CCG018200. 1, CCG020586. 1, CCG025707. 1, CCG019427  
3008044. 1, CCG007710. 1, CCG013065. 1, CCG005501. 1, CCG019446. 1, CCG003161. 1, CCG004534. 1, CCG007063. 1, CCG021949. 1, CCG013865. 1, CCG000738. 1, CCG010378. 2, CCG027114. 1, CCG004468  
3019446. 1, CCG003161. 1, CCG004534. 1, CCG013865. 1, CCG027114. 1, CCG004468. 1, CCG022811. 1, CCG013631. 1, CCG007741. 1, CCG027407. 4, CCG022475. 1, CCG007902. 1, CCG001000. 1, CCG004398  
3011453. 1, CCG008741. 1, CCG021738. 1, CCG017795. 1, CCG001011. 2, CCG020785. 1, CCG018925. 1, CCG020586. 1, CCG020224. 1, CCG000345. 1, CCG012684. 1, CCG006124. 1, CCG027393. 1, CCG025035  
3005203. 1, CCG015867. 1, CCG011803. 1, CCG016414. 1, CCG025135. 1, CCG006618. 1, CCG024719. 1, CCG025070. 1, CCG001867. 2, CCG026029. 1, CCG005426. 1, CCG019308. 1, CCG013366. 1, CCG016104  
3011453. 1, CCG008741. 1, CCG021738. 1, CCG017795. 1, CCG020785. 1, CCG020586. 1, CCG020224. 1, CCG000345. 1, CCG012684. 1, CCG006124. 1, CCG025035. 1, CCG010631. 1, CCG016745. 1, CCG027585  
3006138. 1, CCG027454. 1, CCG016157. 1, CCG003437. 1, CCG004909. 1, CCG021560. 1, CCG003754. 1, CCG026048. 1, CCG009184. 1, CCG002354. 1, CCG012503. 1, CCG002696. 1, CCG003587. 1, CCG007390  
3005203. 1, CCG015867. 1, CCG011803. 1, CCG016414. 1, CCG025135. 1, CCG006618. 1, CCG017968. 1, CCG024719. 1, CCG025070. 1, CCG001867. 2, CCG026029. 1, CCG005426. 1, CCG019308. 1, CCG019007  
3005203. 1, CCG015867. 1, CCG011803. 1, CCG016414. 1, CCG025135. 1, CCG006618. 1, CCG017968. 1, CCG024719. 1, CCG025070. 1, CCG001867. 2, CCG026029. 1, CCG005426. 1, CCG019308. 1, CCG019007  
3006138. 1, CCG020535. 1, CCG027454. 1, CCG012638. 1, CCG016157. 1, CCG028246. 1, CCG026086. 1, CCG022514. 1, CCG026968. 1, CCG008551. 1, CCG004710. 1, CCG021560. 1, CCG003754. 1, CCG009184  
3025135. 1, CCG001867. 2, CCG019308. 1, CCG013184. 1, CCG002634. 1, CCG015206. 1, CCG007993. 1, CCG026413. 3, CCG006911. 1, CCG013012. 1, CCG027145. 1, CCG024631. 1, CCG021509. 1, CCG016330  
3011453. 1, CCG017062. 1, CCG011758. 1, CCG022929. 1, CCG021738. 1, CCG017217. 3, CCG004844. 1, CCG024431. 1, CCG018930. 1, CCG024066. 1, CCG025036. 1, CCG018494. 1, CCG020785. 1, CCG021680  
3001584. 1, CCG018661. 1, CCG022168. 1, CCG021686. 1

3021738. 1, CCG018801. 1, CCG026077. 1, CCG004844. 1, CCG024431. 1, CCG027498. 1  
3001584. 1, CCG018661. 1, CCG022168. 1, CCG021686. 1  
3017217. 3, CCG019174. 1, CCG008468. 1, CCG005090. 1, CCG024478. 1, CCG000094. 1, CCG009949. 1, CCG007787. 1, CCG018890. 1, CCG016091. 1, CCG009948. 1, CCG024592. 1, CCG007166. 1, CCG019174  
3001584. 1, CCG018661. 1, CCG022168. 1, CCG021686. 1  
3006912. 1, CCG015867. 1, CCG025135. 1, CCG007306. 1, CCG028016. 1, CCG001867. 2, CCG019308. 1, CCG009900. 1, CCG006875. 2, CCG013184. 1, CCG002634. 1, CCG015206. 1, CCG007993. 1, CCG017289  
3006912. 1, CCG015867. 1, CCG025135. 1, CCG007306. 1, CCG028016. 1, CCG001867. 2, CCG019308. 1, CCG009900. 1, CCG006875. 2, CCG013184. 1, CCG002634. 1, CCG015206. 1, CCG007993. 1, CCG017289





















































































































































































































































1, CCG001082. 1, CCG024133. 1, CCG020520. 1, CCG013809. 1, CCG003979. 1, CCG016966. 1, CCG007744. 1, CCG004240. 1, CCG009480. 1, CCG004692. 1, CCG022792. 1, CCG011063. 1, CCG021648. 1, CCG0

4. 1, CCG027531. 2

5. 1, CCG011018. 1, CCG000469. 1, CCG005579. 1, CCG014817. 2, CCG021366. 1, CCG022820. 1, CCG024028. 1, CCG008834. 1, CCG004187. 1, CCG018646. 1

7. 1, CCG026069. 1, CCG004919. 1, CCG011410. 1, CCG027111. 1, CCG011446. 1, CCG003007. 1, CCG018692. 1, CCG020219. 1, CCG021236. 1, CCG002834. 1, CCG027393. 1

6. 1., CCG007985. 1., CCG012144. 2., CCG009090. 1., CCG009641. 1., CCG017863. 3., CCG011003. 1., CCG003104. 1., CCG003708. 1., CCG016992. 2., CCG014318. 1., CCG003735. 1., CCG022805. 1., CCG017033. 1., CC

0. 1, CCG002917. 1, CCG014955. 1, CCG007653. 4, CCG024710. 1, CCG003478. 1, CCG003786. 1, CCG010270. 1, CCG010193. 1, CCG005845. 1, CCG020723. 1, CCG003639. 1, CCG026109. 1, CCG014506. 1, CCG

9. 1, CCG020912. 1, CCG009685. 1, CCG018290. 1, CCG020911. 1, CCG013600. 3, CCG010284. 1, CCG019111. 1, CCG018257. 1, CCG013598. 1, CCG002113. 1, CCG019263. 1, CCG009349. 1, CCG025307. 1, CCG

0. 1, CCG002917. 1, CCG014955. 1, CCG007653. 4, CCG024710. 1, CCG003478. 1, CCG003786. 1, CCG010270. 1, CCG010193. 1, CCG005845. 1, CCG020723. 1, CCG003639. 1, CCG026109. 1, CCG014506. 1, CCG

0. 1, CCG002917. 1, CCG014955. 1, CCG007653. 4, CCG024710. 1, CCG003478. 1, CCG003786. 1, CCG010270. 1, CCG010193. 1, CCG005845. 1, CCG020723. 1, CCG003639. 1, CCG026109. 1, CCG014506. 1, CCG

6.1

8. 1, CCG009496. 1, CCG012050. 1, CCG018943. 2, CCG007720. 1, CCG012579. 1, CCG015756. 1, CCG017624. 1, CCG020227. 1, CCG028323. 1, CCG024123. 2, CCG007420. 1, CCG025631. 1, CCG021545. 1, CCG

1. 1, CCG020589. 1, CCG026826. 1, CCG019500. 1, CCG026825. 1, CCG017408. 1, CCG024680. 1, CCG004448. 2, CCG020377. 1, CCG001040. 1, CCG004398. 1, CCG007854. 1, CCG000614. 1, CCG011567. 1, CCG012578. 1, CCG012050. 1, CCG018943. 2, CCG007720. 1, CCG012579. 1, CCG018128. 1, CCG015756. 1, CCG017624. 1, CCG008919. 1, CCG028323. 1, CCG024123. 2, CCG004145. 1, CCG025631. 1, CCG016011. 1, CCG012125. 1, CCG023881. 1, CCG024998. 1, CCG011387. 1, CCG016436. 1, CCG014258. 1, CCG012104. 1, CCG010364. 1, CCG016012. 1  
7. 1, CCG016011. 1, CCG012125. 1, CCG023881. 1, CCG024998. 1, CCG011387. 1, CCG016436. 1, CCG014258. 1, CCG012104. 1, CCG010364. 1, CCG016012. 1  
0. 1, CCG019890. 1, CCG027184. 1  
7. 1, CCG025962. 1, CCG014181. 1, CCG011695. 1, CCG000044. 1, CCG007816. 1, CCG013298. 1, CCG023925. 1, CCG011257. 1, CCG018642. 1, CCG020165. 1, CCG015306. 1, CCG015029. 1, CCG023922. 1, CCG012578. 1, CCG012050. 1, CCG018943. 2, CCG007720. 1, CCG012579. 1, CCG018128. 1, CCG015756. 1, CCG017624. 1, CCG008919. 1, CCG028323. 1, CCG024123. 2, CCG004145. 1, CCG025631. 1, CCG016011. 1, CCG012125. 1, CCG023881. 1, CCG024998. 1, CCG011387. 1, CCG016436. 1, CCG014258. 1, CCG012104. 1, CCG010364. 1, CCG016012. 1

2. 1, CCG012104. 1

5. 1, CCG008715. 1, CCG009900. 1, CCG016175. 1, CCG006875. 2, CCG006934. 1, CCG015206. 1, CCG025503. 1, CCG017289. 1, CCG021734. 1, CCG002386. 1, CCG015844. 1, CCG013012. 1, CCG002383. 1, CCG010112. 1, CCG022464. 1, CCG017552. 1, CCG017614. 1, CCG016304. 1, CCG013708. 1, CCG004605. 1, CCG013643. 1, CCG005496. 1, CCG010222. 1, CCG024297. 1, CCG027184. 1, CCG005140. 1, CCG013044. 1, CCG009685. 1, CCG018290. 1, CCG025552. 1, CCG024932. 1, CCG019111. 1, CCG013063. 1, CCG027631. 1, CCG020408. 1

2. 1, CCG020879. 1, CCG003878. 1, CCG027758. 1, CCG010112. 1, CCG022464. 1, CCG005277. 1, CCG017552. 1, CCG017614. 1, CCG014448. 1, CCG016304. 1, CCG027154. 1, CCG013708. 1, CCG004605. 1, CCG013643. 1, CCG005496. 1, CCG010222. 1, CCG024297. 1, CCG027184. 1, CCG005140. 1, CCG013044. 1, CCG009685. 1, CCG018290. 1, CCG025552. 1, CCG024932. 1, CCG019111. 1, CCG013063. 1, CCG027631. 1, CCG020408. 1

8. 1, CCG013044. 1, CCG009685. 1, CCG018290. 1, CCG025552. 1, CCG024932. 1, CCG019111. 1, CCG013063. 1, CCG027631. 1, CCG020408. 1

1. 1, CCG000939. 1, CCG007043. 1, CCG016127. 1, CCG020474. 1, CCG025658. 1, CCG021444. 1, CCG023511. 1, CCG009393. 1, CCG012553. 1, CCG024425. 1, CCG019674. 1, CCG000583. 2, CCG020686. 1, CCG016436. 1, CCG014258. 1, CCG016012. 1, CCG012104. 1  
7. 1, CCG016436. 1, CCG014258. 1, CCG016012. 1, CCG012104. 1  
4. 1, CCG002389. 1, CCG024905. 1, CCG005974. 1, CCG014382. 1, CCG017614. 1, CCG016326. 1, CCG013708. 1, CCG023583. 1, CCG003712. 1, CCG024297. 1, CCG027184. 1, CCG001379. 1, CCG005140. 1, CCG013044. 1, CCG009685. 1, CCG018290. 1, CCG025552. 1, CCG024932. 1, CCG019111. 1, CCG013063. 1, CCG027631. 1, CCG020408. 1

6. 1, CCG015914. 1, CCG013708. 1, CCG027756. 1, CCG005496. 1, CCG010222. 1, CCG005140. 1, CCG012096. 1, CCG024382. 1, CCG006004. 1, CCG024034. 1, CCG026799. 1, CCG025964. 1, CCG010711. 1, CCG022398. 1, CCG001978. 1, CCG023752. 1, CCG015156. 1, CCG018778. 1, CCG009562. 2, CCG009970. 1, CCG011092. 1, CCG019418. 1, CCG017793. 1, CCG022741. 1, CCG016745. 1, CCG008833. 1, CCG010112. 1, CCG022464. 1, CCG017552. 1, CCG017614. 1, CCG016304. 1, CCG013708. 1, CCG004605. 1, CCG013643. 1, CCG005496. 1, CCG010222. 1, CCG024297. 1, CCG027184. 1, CCG005140. 1, CCG013044. 1, CCG009685. 1, CCG018290. 1, CCG025552. 1, CCG024932. 1, CCG019111. 1, CCG013063. 1, CCG027631. 1, CCG020408. 1

1. 1, CCG022398. 1, CCG001978. 1, CCG023752. 1, CCG015156. 1, CCG018778. 1, CCG009562. 2, CCG009970. 1, CCG011092. 1, CCG019418. 1, CCG017793. 1, CCG022741. 1, CCG016745. 1, CCG008833. 1, CCG010112. 1, CCG022464. 1, CCG017552. 1, CCG017614. 1, CCG016304. 1, CCG013708. 1, CCG004605. 1, CCG013643. 1, CCG005496. 1, CCG010222. 1, CCG024297. 1, CCG027184. 1, CCG005140. 1, CCG013044. 1, CCG009685. 1, CCG018290. 1, CCG025552. 1, CCG024932. 1, CCG019111. 1, CCG013063. 1, CCG027631. 1, CCG020408. 1

1. 1, CCG022398. 1, CCG001978. 1, CCG023752. 1, CCG015156. 1, CCG018778. 1, CCG009562. 2, CCG009970. 1, CCG011092. 1, CCG019418. 1, CCG017793. 1, CCG022741. 1, CCG016745. 1, CCG008833. 1, CCG

[illegible]

7. 1, CCG009496. 1, CCG012050. 1, CCG018943. 2, CCG007720. 1, CCG012579. 1, CCG018128. 1, CCG018907. 1, CCG015756. 1, CCG017624. 1, CCG003485. 1, CCG006994. 1, CCG028323. 1, CCG024123. 2, CCG016030. 1, CCG024425. 1, CCG019674. 1, CCG000583. 2, CCG020686. 1, CCG004402. 1, CCG004076. 1, CCG012895. 1, CCG007902. 1, CCG023129. 1, CCG007263. 1, CCG007758. 1  
9. 1, CCG003878. 1, CCG027758. 1, CCG005277. 1, CCG000723. 1, CCG009481. 1, CCG017614. 1, CCG016326. 1, CCG013708. 1, CCG000118. 1, CCG003712. 1, CCG024297. 1, CCG027184. 1, CCG005140. 1, CCG003712. 1, CCG024297. 1, CCG027184. 1, CCG005140. 1, CCG009367. 1, CCG017078. 1, CCG012061. 1, CCG026799. 1, CCG011696. 1, CCG016959. 1, CCG027368. 1, CCG001220. 1, CCG019190. 1, CCG023752. 1, CCG018778. 1, CCG009562. 2, CCG009970. 1, CCG011092. 1, CCG008833. 1, CCG017777. 1, CCG000659. 1, CCG014509. 1, CCG027127. 1, CCG015425. 1, CCG014463. 1, CCG026788. 1, CCG003712. 1, CCG024297. 1, CCG027184. 1, CCG001379. 1, CCG005140. 1, CCG009367. 1, CCG012061. 1, CCG026799. 1, CCG025274. 1, CCG027185. 1, CCG009530. 1, CCG018883. 1, CCG016959. 1, CCG003878. 1, CCG027758. 1, CCG022794. 1, CCG014382. 1, CCG005277. 1, CCG000723. 1, CCG009481. 1, CCG017614. 1, CCG016326. 1, CCG013708. 1, CCG023583. 1, CCG000118. 1, CCG003712. 1, CCG027184. 1, CCG025568. 1, CCG006004. 1, CCG025964. 1, CCG027585. 1, CCG019647. 1, CCG019190. 1, CCG003289. 1, CCG027182. 1, CCG016864. 1, CCG023314. 1, CCG008587. 1, CCG002559. 1, CCG004535. 1, CCG013631. 1, CCG027407. 4, CCG025106. 2, CCG000209. 1, CCG002470. 1, CCG007902. 1, CCG001000. 1, CCG028505. 1, CCG001038. 1, CCG006164. 1, CCG018617. 1, CCG020377. 1, CCG013635. 1, CCG021686. 1, CCG014158. 1, CCG011730. 1, CCG018801. 1, CCG023153. 3, CCG020400. 2, CCG010416. 1, CCG023530. 2, CCG026077. 1, CCG020040. 1, CCG027498. 1, CCG000118. 1, CCG013635. 1, CCG021686. 1, CCG014158. 1, CCG011730. 1, CCG018801. 1, CCG023153. 3, CCG020400. 2, CCG010416. 1, CCG023530. 2, CCG026077. 1, CCG020040. 1, CCG027498. 1, CCG000118. 1, CCG012895. 1  
5. 1, CCG008004. 1, CCG006934. 1, CCG015206. 1, CCG013012. 1, CCG022848. 1, CCG014385. 1, CCG021604. 1, CCG008467. 1, CCG016989. 1, CCG013119. 1, CCG021550. 1, CCG019703. 1, CCG027735. 1, CCG

5. 1

6. 1, CCG014158. 1, CCG015914. 1, CCG026240. 1, CCG018801. 1, CCG014448. 1, CCG023153. 3, CCG013013. 1, CCG014000. 1, CCG000118. 1, CCG027184. 1, CCG025568. 1, CCG017477. 1, CCG022137. 1, CCG023153. 3, CCG013013. 1, CCG014000. 1, CCG000118. 1, CCG027184. 1, CCG025568. 1, CCG017477. 1, CCG022137. 1, CCG023153. 3, CCG010416. 1, CCG026077. 1, CCG020040. 1, CCG027498. 1, CCG000118. 1

[illegible]

6. 1, CCG022137. 1, CCG025964. 1, CCG001279. 1, CCG027585. 1, CCG025510. 1, CCG015647. 1, CCG025632. 1, CCG019190. 1, CCG018661. 1, CCG023314. 1, CCG014240. 1, CCG002559. 1, CCG008587. 1, CCG020224. 1, CCG010370. 1, CCG000345. 1, CCG012684. 1, CCG006124. 1, CCG025035. 1, CCG012573. 1, CCG017793. 1, CCG010631. 1, CCG016689. 2, CCG024639. 1, CCG016745. 1, CCG019420. 2, CCG020224. 1, CCG010370. 1, CCG000345. 1, CCG012684. 1, CCG006124. 1, CCG025035. 1, CCG012573. 1, CCG017793. 1, CCG010631. 1, CCG016689. 2, CCG024639. 1, CCG016745. 1, CCG019420. 2, CCG011366. 1, CCG022811. 1, CCG013631. 1, CCG007741. 1, CCG009140. 1, CCG027407. 4, CCG022475. 1, CCG007902. 1, CCG001000. 1, CCG028505. 1, CCG023468. 1, CCG013993. 1, CCG004398. 1, CCG009119. 1, CCG015350. 1, CCG012213. 2, CCG025283. 1, CCG022311. 1, CCG025658. 1, CCG018649. 1, CCG004719. 1, CCG022990. 1, CCG003231. 1, CCG021137. 1, CCG006968. 1, CCG011727. 1, CCG010631. 1, CCG016745. 1, CCG018101. 1, CCG027585. 1, CCG000659. 1, CCG014509. 1, CCG000077. 1, CCG009553. 1, CCG027127. 1, CCG024790. 1, CCG002034. 1, CCG024918. 1, CCG023662. 1, CCG005199. 1, CCG018656. 1, CCG013184. 1, CCG020188. 1, CCG028103. 1, CCG028277. 1, CCG002634. 1, CCG018760. 1, CCG007993. 1, CCG006911. 1, CCG007207. 1, CCG007303. 1, CCG021509. 1, CCG000659. 1, CCG014509. 1, CCG009553. 1, CCG000077. 1, CCG027127. 1, CCG024790. 1, CCG002034. 1, CCG024918. 1, CCG023662. 1, CCG018661. 1, CCG022281. 1, CCG027669. 1, CCG015967. 1, CCG015945. 1, CCG016378. 1, CCG003573. 1, CCG025223. 1, CCG011296. 1, CCG020463. 1, CCG007854. 1, CCG008753. 1, CCG016370. 1, CCG019944. 1, CCG014318. 1, CCG026871. 2, CCG001143. 1, CCG013366. 1, CCG016104. 1, CCG005199. 1, CCG006071. 1, CCG018656. 1, CCG013184. 1, CCG020188. 1, CCG028103. 1, CCG028277. 1, CCG002634. 1, CCG018760. 1, CCG007993. 1, CCG024600. 1, CCG013366. 1, CCG016104. 1, CCG005199. 1, CCG006071. 1, CCG018656. 1, CCG013184. 1, CCG020188. 1, CCG028103. 1, CCG028277. 1, CCG002634. 1, CCG018760. 1, CCG007993. 1, CCG024600. 1, CCG003817. 1, CCG015750. 1, CCG012757. 1, CCG012503. 1, CCG011556. 1, CCG012756. 1, CCG015945. 1, CCG005118. 1, CCG026334. 1, CCG009968. 1, CCG011296. 1, CCG011264. 1, CCG015925. 1, CCG025122. 1, CCG025069. 2, CCG024294. 1, CCG014686. 1, CCG007116. 1, CCG016105. 1, CCG020562. 1, CCG009690. 1, CCG027940. 1, CCG000812. 1, CCG000602. 1, CCG023576. 1, CCG017233. 1, CCG020659. 1, CCG027668. 1, CCG000345. 1, CCG012684. 1, CCG006124. 1, CCG025035. 1, CCG008755. 1, CCG010631. 1, CCG020326. 1, CCG010505. 1, CCG022168. 1, CCG027921. 1, CCG009553. 1, CCG

5. 1, CCG007517. 1, CCG005538. 1, CCG013191. 1, CCG020881. 1, CCG025127. 1, CCG021480. 1, CCG013211. 1, CCG004000. 1, CCG014342. 1, CCG024477. 1, CCG024997. 1, CCG027709. 1

9. 1, CCG026413. 3, CCG006911. 1, CCG013012. 1, CCG027145. 1, CCG001168. 1, CCG024631. 1, CCG021509. 1, CCG016336. 1, CCG025122. 1, CCG005323. 1, CCG026069. 1, CCG025069. 2, CCG003767. 1, CCG026413. 3, CCG006911. 1, CCG013012. 1, CCG027145. 1, CCG001168. 1, CCG024631. 1, CCG021509. 1, CCG016336. 1, CCG025122. 1, CCG005323. 1, CCG026069. 1, CCG025069. 2, CCG003767. 1, CCG





















































































































































































































































10208. 1, CCG027568. 1, CCG006445. 1, CCG000392. 1, CCG025777. 1, CCG021574. 1, CCG007746. 1, CCG007937. 2, CCG004016. 1, CCG013805. 1, CCG019446. 1, CCG019953. 1, CCG008089. 1, CCG006812.

3015583. 1, CCG021366. 1, CCG018859. 3, CCG008834. 1, CCG004187. 1, CCG018646. 1, CCG028236. 1  
3016252. 1, CCG009080. 1, CCG004869. 1, CCG028579. 1, CCG023999. 1, CCG025396. 1, CCG017373. 1, CCG026953. 1, CCG021047. 1, CCG006924. 1, CCG003004. 1, CCG021220. 1, CCG017591. 1, CCG01364  
3019857. 1, CCG017391. 1, CCG022869. 1, CCG000948. 1, CCG010283. 1, CCG007619. 1, CCG004916. 1, CCG022025. 2, CCG015526. 1, CCG015525. 1, CCG014451. 1, CCG012769. 2, CCG014228. 2, CCG01445

3016252. 1, CCG009080. 1, CCG004869. 1, CCG028579. 1, CCG023999. 1, CCG025396. 1, CCG017373. 1, CCG026953. 1, CCG021047. 1, CCG006924. 1, CCG003004. 1, CCG021220. 1, CCG017591. 1, CCG01364  
3016252. 1, CCG009080. 1, CCG004869. 1, CCG028579. 1, CCG023999. 1, CCG025396. 1, CCG017373. 1, CCG026953. 1, CCG021047. 1, CCG006924. 1, CCG003004. 1, CCG021220. 1, CCG017591. 1, CCG01364

3024665. 1, CCG001497. 1, CCG027717. 1, CCG015441. 2, CCG015763. 2, CCG027502. 1, CCG016715. 1, CCG012088. 1, CCG005286. 1, CCG021468. 1, CCG009424. 1, CCG009139. 1, CCG020660. 1, CCG00067

3028554. 1, CCG000848. 1, CCG007043. 1, CCG012213. 2, CCG027418. 1, CCG002792. 1, CCG005449. 1, CCG026871. 2, CCG007411. 1, CCG027635. 1, CCG015546. 1, CCG018719. 1, CCG004719. 1, CCG002223. 1, CCG021545. 1, CCG026559. 1, CCG004168. 2, CCG027717. 1, CCG015441. 2, CCG015763. 2, CCG016715. 1, CCG012088. 1, CCG020660. 1, CCG004723. 1, CCG027557. 1, CCG004239. 3, CCG007260. 1, CCG012339. 1

3007814. 1, CCG006911. 1, CCG026044. 1, CCG007963. 1, CCG022378. 1, CCG015804. 1, CCG006375. 1, CCG026626. 1, CCG017079. 1, CCG023923. 1, CCG018643. 1, CCG019371. 1, CCG026552. 1, CCG023420. 1, CCG021545. 1, CCG026559. 1, CCG004168. 2, CCG027717. 1, CCG015441. 2, CCG015763. 2, CCG016715. 1, CCG012088. 1, CCG020660. 1, CCG004723. 1, CCG027557. 1, CCG004239. 3, CCG007260. 1, CCG012339. 1

3008467. 1, CCG010867. 1, CCG013364. 1, CCG005323. 1, CCG010865. 1, CCG005885. 1, CCG008920. 1, CCG003408. 1, CCG027735. 1, CCG019741. 1, CCG026313. 1, CCG010306. 1, CCG005131. 1, CCG010339. 1

3013643. 1, CCG005496. 1, CCG010222. 1, CCG024297. 1, CCG027184. 1, CCG005140. 1, CCG002038. 1, CCG026799. 1, CCG025964. 1, CCG010711. 1, CCG027585. 1, CCG000148. 1, CCG006486. 1, CCG016959. 1, CCG002038. 1, CCG026799. 1, CCG025964. 1, CCG010711. 1, CCG000148. 1, CCG006486. 1, CCG016959. 1, CCG005924. 2, CCG019190. 1, CCG025450. 1, CCG003501. 1, CCG017641. 1, CCG016654. 1, CCG013420. 1

3023129. 1, CCG006043. 1, CCG004895. 1, CCG026612. 1

3009367. 1, CCG017078. 1, CCG012061. 1, CCG026799. 1, CCG011696. 1, CCG025274. 1, CCG027185. 1, CCG009530. 1, CCG005539. 1, CCG018883. 1, CCG016959. 1, CCG012307. 1, CCG027368. 1, CCG001220. 1

3026151. 1, CCG016959. 1, CCG003289. 1, CCG009022. 2, CCG017641. 1, CCG016654. 1, CCG013420. 1, CCG023314. 1, CCG015653. 1, CCG025323. 1, CCG023671. 2

3012536. 1, CCG015773. 1, CCG000659. 1, CCG014509. 1, CCG027127. 1, CCG015425. 1, CCG027796. 1, CCG026788. 1, CCG014463. 1, CCG020543. 1, CCG018533. 1, CCG025549. 1, CCG027950. 1, CCG022289. 1

3012536. 1, CCG015773. 1, CCG000659. 1, CCG014509. 1, CCG027127. 1, CCG015425. 1, CCG027796. 1, CCG026788. 1, CCG014463. 1, CCG020543. 1, CCG018533. 1, CCG025549. 1, CCG027950. 1, CCG02228:

3023314. 1, CCG002559. 1, CCG008587. 1, CCG015653. 1, CCG001964. 1, CCG025323. 1, CCG019890. 1, CCG004308. 1, CCG010710. 1, CCG006469. 1, CCG026796. 1, CCG026314. 1, CCG027718. 1, CCG023980  
3025631. 1, CCG015870. 1, CCG021545. 1, CCG027717. 1, CCG015441. 2, CCG015763. 2, CCG016715. 1, CCG012088. 1, CCG020660. 1, CCG020637. 1, CCG012678. 1, CCG027557. 1, CCG004239. 3, CCG007260  
3003767. 1, CCG021911. 1, CCG013876. 1, CCG003415. 1, CCG009270. 1, CCG019521. 1, CCG003624. 1, CCG020537. 1, CCG003639. 1, CCG020286. 1, CCG016933. 1, CCG007528. 1, CCG026953. 1, CCG010629:

3004145. 1, CCG025631. 1, CCG021545. 1, CCG027717. 1, CCG019909. 1, CCG015441. 2, CCG015763. 2, CCG016715. 1, CCG012088. 1, CCG009244. 1, CCG009139. 1, CCG020660. 1, CCG025465. 1, CCG023114:

3009367. 1, CCG012061. 1, CCG026799. 1, CCG015647. 1, CCG006486. 1, CCG016959. 1, CCG026667. 1, CCG019190. 1, CCG025450. 1, CCG003501. 1, CCG018661. 1, CCG016654. 1, CCG018133. 1, CCG020840  
3025450. 1, CCG007855. 1, CCG024032. 1, CCG018661. 1, CCG016654. 1, CCG018133. 1, CCG014240. 1, CCG026077. 1, CCG016754. 1, CCG026050. 1, CCG001964. 1, CCG017826. 1, CCG001673. 1, CCG010710  
3020543. 1, CCG022089. 1, CCG014709. 2, CCG022281. 1, CCG011465. 1, CCG016592. 1, CCG002045. 1, CCG025572. 1, CCG004878. 1, CCG027186. 1, CCG014243. 1, CCG008229. 1, CCG018847. 1, CCG022048  
3012307. 1, CCG019190. 1, CCG025450. 1, CCG018661. 1, CCG016654. 1, CCG018133. 1, CCG014240. 1, CCG026077. 1, CCG016754. 1, CCG026050. 1, CCG001964. 1, CCG017826. 1, CCG009668. 1, CCG010710  
3024297. 1, CCG027184. 1, CCG005140. 1, CCG009367. 1, CCG012061. 1, CCG026799. 1, CCG015647. 1, CCG006486. 1, CCG016959. 1, CCG026667. 1, CCG019190. 1, CCG010939. 1, CCG025450. 1, CCG003501  
3020400. 2, CCG023530. 2, CCG015653. 1, CCG027498. 1, CCG001964. 1, CCG019890. 1, CCG011706. 1  
3004398. 1, CCG008027. 1, CCG010114. 1, CCG007045. 1, CCG012213. 2, CCG007856. 1, CCG016094. 1, CCG025658. 1, CCG018649. 1, CCG022990. 1, CCG013353. 1, CCG018796. 1, CCG004719. 1, CCG012629  
3027184. 1  
3027184. 1

3009382. 1, CCG006287. 1, CCG024865. 1

3022168. 1, CCG006803. 1, CCG001279. 1, CCG027585. 1, CCG019647. 1, CCG019190. 1, CCG027182. 1, CCG018661. 1, CCG016864. 1, CCG013635. 1, CCG011730. 1, CCG002559. 1, CCG020400. 2, CCG010410  
3022168. 1, CCG006803. 1, CCG001279. 1, CCG027585. 1, CCG019647. 1, CCG019190. 1, CCG027182. 1, CCG018661. 1, CCG016864. 1, CCG013635. 1, CCG011730. 1, CCG002559. 1, CCG020400. 2, CCG010410

3002644. 1, CCG024813. 1, CCG008270. 1, CCG005737. 1, CCG002680. 1, CCG006336. 1, CCG011972. 1, CCG013870. 1, CCG014051. 1, CCG005443. 1, CCG009249. 1, CCG014896. 1, CCG001863. 1, CCG002890  
3015653. 1, CCG020040. 1, CCG026077. 1, CCG001964. 1, CCG027498. 1, CCG019890. 1, CCG006469. 1, CCG014710. 1, CCG026796. 1, CCG026303. 1, CCG022916. 1, CCG006770. 1, CCG009808. 1, CCG004842  
3015653. 1, CCG020040. 1, CCG026077. 1, CCG001964. 1, CCG027498. 1, CCG019890. 1, CCG006469. 1, CCG014710. 1, CCG026796. 1, CCG026303. 1, CCG022916. 1, CCG006770. 1, CCG009808. 1, CCG004842  
3015653. 1, CCG020040. 1, CCG026077. 1, CCG001964. 1, CCG027498. 1, CCG019890. 1, CCG006469. 1, CCG014710. 1, CCG026796. 1, CCG026303. 1, CCG022916. 1, CCG006770. 1, CCG009808. 1, CCG004842

3015653. 1, CCG020040. 1, CCG026077. 1, CCG001964. 1, CCG027498. 1, CCG019890. 1, CCG006469. 1, CCG014710. 1, CCG026796. 1, CCG026303. 1, CCG022916. 1, CCG006770. 1, CCG009808. 1, CCG004844. 1, CCG014087. 1, CCG027585. 1, CCG000659. 1, CCG014509. 1, CCG000077. 1, CCG009553. 1, CCG027127. 1, CCG024790. 1, CCG002034. 1, CCG024918. 1, CCG023662. 1, CCG018661. 1, CCG022281. 1, CCG027669. 1, CCG014087. 1, CCG027585. 1, CCG000659. 1, CCG014509. 1, CCG000077. 1, CCG009553. 1, CCG027127. 1, CCG024790. 1, CCG002034. 1, CCG024918. 1, CCG023662. 1, CCG018661. 1, CCG022281. 1, CCG027669. 1, CCG009119. 1, CCG015350. 1, CCG012213. 2, CCG022311. 1, CCG025283. 1, CCG021948. 1, CCG011148. 1, CCG025658. 1, CCG016094. 1, CCG018649. 1, CCG022990. 1, CCG004719. 1, CCG018796. 1, CCG013359. 1, CCG028426. 1, CCG025541. 1, CCG017001. 1, CCG022792. 1  
3000526. 1, CCG018661. 1, CCG022281. 1, CCG027669. 1, CCG015967. 1, CCG020881. 1, CCG026077. 1, CCG004878. 1, CCG000078. 1, CCG016857. 1, CCG008742. 1, CCG017062. 1, CCG011758. 1, CCG004279. 1, CCG016336. 1, CCG006444. 1, CCG025122. 1, CCG013937. 1, CCG027953. 2, CCG025069. 2, CCG020054. 1, CCG019833. 1, CCG015815. 1, CCG024294. 1, CCG015990. 1, CCG027941. 1, CCG014686. 1, CCG003884. 1, CCG020881. 1, CCG026077. 1, CCG004878. 1, CCG000078. 1, CCG016857. 1, CCG008742. 1, CCG011758. 1, CCG017062. 1, CCG022929. 1, CCG004844. 1, CCG017217. 3, CCG024431. 1, CCG018930. 1, CCG024060. 1, CCG027620. 1, CCG028190. 2, CCG018020. 1, CCG008270. 1, CCG007212. 1, CCG005737. 1, CCG011972. 1, CCG009249. 1, CCG004326. 1, CCG014896. 1, CCG001863. 1, CCG020535. 1, CCG002890. 1, CCG022291. 1, CCG006911. 1, CCG007207. 1, CCG007303. 1, CCG001168. 1, CCG021509. 1, CCG016336. 1, CCG006444. 1, CCG025122. 1, CCG013937. 1, CCG027953. 2, CCG025069. 2, CCG020054. 1, CCG019833. 1, CCG015815. 1, CCG006911. 1, CCG007207. 1, CCG007303. 1, CCG001168. 1, CCG021509. 1, CCG016336. 1, CCG006444. 1, CCG025122. 1, CCG013937. 1, CCG027953. 2, CCG025069. 2, CCG020054. 1, CCG019833. 1, CCG015815. 1, CCG020463. 1, CCG009774. 1, CCG025138. 1, CCG007624. 1, CCG026699. 1, CCG007880. 1, CCG001143. 1, CCG028245. 1, CCG000788. 1, CCG027620. 1, CCG026742. 1, CCG002524. 1, CCG001443. 1, CCG021839. 1, CCG027114. 1, CCG019188. 1, CCG015897. 1, CCG001214. 1, CCG002163. 1, CCG026384. 1, CCG022225. 1, CCG017305. 1, CCG028590. 1, CCG008004. 1, CCG017570. 1, CCG018585. 3, CCG008341. 1, CCG000320. 1, CCG000077. 1, CCG024790. 1, CCG002034. 1, CCG024918. 1, CCG023662. 1, CCG008444. 1, CCG018661. 1, CCG027669. 1, CCG015967. 1, CCG004238. 1, CCG020881. 1, CCG011730. 1, CCG026077. 1, CCG019729. 1

3024294. 1, CCG014686. 1, CCG003624. 1, CCG007116. 1, CCG019415. 1, CCG016105. 1, CCG005930. 1, CCG020562. 1, CCG009690. 1, CCG005125. 1, CCG027940. 1, CCG000812. 1, CCG000602. 1, CCG023570. 1, CCG024294. 1, CCG014686. 1, CCG003624. 1, CCG007116. 1, CCG019415. 1, CCG016105. 1, CCG005930. 1, CCG020562. 1, CCG009690. 1, CCG005125. 1, CCG027940. 1, CCG000812. 1, CCG000602. 1, CCG023570. 1





















































































































































































































































1, CCG022320. 1, CCG008897. 1, CCG002067. 1, CCG002938. 1, CCG012895. 1, CCG019549. 1, CCG018319. 2, CCG023396. 1, CCG004142. 1, CCG002897. 1, CCG023355. 1, CCG019470. 1, CCG007425. 1, CCG0

[illegible][illegible]

3. 1., CCG023114. 1., CCG013816. 1., CCG027557. 1., CCG004239. 3., CCG007260. 1., CCG008713. 2., CCG012339. 1., CCG008345. 2., CCG026670. 1., CCG028322. 1., CCG017623. 1., CCG000960. 1., CCG011895. 1., CCG

[illegible]

0. 1, CCG014180. 1, CCG010727. 1, CCG012984. 1, CCG028454. 1, CCG010019. 1, CCG003601. 1, CCG020663. 1, CCG003966. 1, CCG028648. 1, CCG014791. 1  
9. 1, CCG026670. 1, CCG028322. 1, CCG022399. 1, CCG017623. 1, CCG011895. 1, CCG026613. 1, CCG018226. 1, CCG024532. 1, CCG027247. 1, CCG025378. 1, CCG019274. 1, CCG018942. 1, CCG027108. 1, CC

2. 1, CCG006287. 1, CCG005998. 1, CCG018582. 1, CCG003407. 1, CCG007116. 1, CCG025777. 1, CCG005930. 1, CCG010878. 1, CCG005125. 1, CCG022619. 2, CCG012666. 1, CCG014935. 1, CCG008089. 1, CCG

9. 1, CCG005924. 2, CCG019190. 1, CCG025450. 1, CCG003501. 1, CCG017641. 1, CCG016654. 1, CCG013420. 1, CCG018133. 1, CCG023314. 1, CCG002559. 1, CCG008587. 1, CCG015653. 1, CCG001964. 1, CCG0017826. 1, CCG023314. 1, CCG002559. 1, CCG008587. 1, CCG015653. 1, CCG001964. 1, CCG017826. 1, CCG021934. 1, CCG019890. 1, CCG025323. 1, CCG004308. 1, CCG010710. 1, CCG006469. 1, CCG001649. 1, CCG

D. 1, CCG019190. 1, CCG025450. 1, CCG007855. 1, CCG024032. 1, CCG018661. 1, CCG016654. 1, CCG018133. 1, CCG014240. 1, CCG026077. 1, CCG016754. 1, CCG026050. 1, CCG001964. 1, CCG017826. 1, CC

1. 1, CCG011465. 1, CCG002411. 1, CCG016592. 1, CCG002045. 1, CCG025572. 1, CCG004878. 1, CCG027186. 1, CCG014243. 1, CCG008229. 1, CCG009023. 1, CCG011348. 1, CCG018847. 1, CCG027258. 1, CC



4. 1, CCG022510. 1, CCG002839. 1, CCG019191. 1, CCG024431. 1, CCG006588. 2, CCG010415. 1, CCG000991. 1, CCG025544. 1, CCG014156. 1, CCG001145. 1, CCG021686. 1, CCG015914. 1, CCG014158. 1, CCG015967. 1, CCG002411. 1, CCG020881. 1, CCG026077. 1, CCG004878. 1, CCG000078. 1, CCG016857. 1, CCG028513. 1, CCG007587. 1, CCG026109. 1, CCG008742. 1, CCG011228. 1, CCG024952. 1, CCG015967. 1, CCG002411. 1, CCG020881. 1, CCG026077. 1, CCG004878. 1, CCG000078. 1, CCG016857. 1, CCG028513. 1, CCG007587. 1, CCG026109. 1, CCG008742. 1, CCG011228. 1, CCG024952. 1, CCG012623. 1, CCG003231. 1, CCG004515. 1, CCG021137. 1, CCG024289. 1, CCG001009. 1, CCG006968. 1, CCG011727. 1, CCG015521. 1, CCG022428. 1, CCG025541. 1, CCG028426. 1, CCG017001. 1, CCG022929. 1, CCG004844. 1, CCG017217. 3, CCG024431. 1, CCG018930. 1, CCG024066. 1, CCG025036. 1, CCG018494. 1, CCG021686. 1, CCG012009. 1, CCG020659. 1, CCG027668. 1, CCG015893. 1, CCG019046. 2, CCG016345. 1, CCG010235. 2, CCG018224. 1, CCG016105. 1, CCG024758. 1, CCG020562. 1, CCG023695. 1, CCG006931. 1, CCG001873. 1, CCG028517. 1, CCG013258. 1, CCG027940. 1, CCG025036. 1, CCG018494. 1, CCG021686. 1, CCG012009. 1, CCG020659. 1, CCG027668. 1, CCG015893. 1, CCG008755. 1, CCG020326. 1, CCG015924. 1, CCG022168. 1, CCG010505. 1, CCG027921. 1, CCG007059. 1, CCG026086. 1, CCG009080. 1, CCG015169. 1, CCG018788. 1, CCG025396. 1, CCG015750. 1, CCG006344. 1, CCG027913. 1, CCG026280. 1, CCG011556. 1, CCG016285. 1, CCG026334. 1, CCG024294. 1, CCG015990. 1, CCG027941. 1, CCG014686. 1, CCG003884. 1, CCG003624. 1, CCG019046. 2, CCG016345. 1, CCG010235. 2, CCG018224. 1, CCG019415. 1, CCG016105. 1, CCG024758. 1, CCG024294. 1, CCG015990. 1, CCG027941. 1, CCG014686. 1, CCG003884. 1, CCG003624. 1, CCG019046. 2, CCG016345. 1, CCG010235. 2, CCG018224. 1, CCG019415. 1, CCG016105. 1, CCG024758. 1, CCG018020. 1, CCG028190. 2, CCG009775. 1, CCG012033. 1, CCG011404. 1, CCG022296. 1, CCG001689. 1, CCG011343. 1, CCG007212. 1, CCG010766. 1, CCG004977. 1, CCG001442. 1, CCG012255. 1, CCG014385. 1, CCG003203. 1, CCG012955. 1, CCG022226. 1, CCG013119. 1, CCG005089. 1, CCG012191. 1, CCG007823. 1, CCG019323. 1, CCG012023. 1, CCG024254. 1, CCG003608. 1, CCG012957. 1, CCG017773. 1, CCG015966. 1, CCG024664. 1, CCG021354. 1, CCG000078. 1

3. 1, CCG017233. 1, CCG027114. 1, CCG019188. 1, CCG022996. 1, CCG015897. 1, CCG001214. 1, CCG002163. 1, CCG017549. 1, CCG026384. 1, CCG022225. 1, CCG017305. 1, CCG028590. 1, CCG001921. 1, CCG017233. 1, CCG027114. 1, CCG019188. 1, CCG022996. 1, CCG015897. 1, CCG001214. 1, CCG002163. 1, CCG017549. 1, CCG026384. 1, CCG022225. 1, CCG017305. 1, CCG028590. 1, CCG001921. 1, CCG





















































































































































































































































24172. 1, CCG010570. 1, CCG009209. 1, CCG027392. 1, CCG001518. 1, CCG006660. 1, CCG028235. 1, CCG010864. 1, CCG004770. 1, CCG015525. 1, CCG013113. 1, CCG026328. 1, CCG023643. 1, CCG014565.

CG012840.1, CCG024057.1, CCG011097.1, CCG025131.2, CCG017278.1, CCG002852.1, CCG022184.1, CCG021152.1, CCG023526.2, CCG008360.1, CCG006273.1, CCG010133.1, CCG010140.1, CCG007060.1

3024057. 1, CCG011097. 1, CCG025131. 2, CCG017278. 1, CCG002852. 1, CCG022184. 1, CCG021152. 1, CCG023526. 2, CCG008360. 1, CCG006273. 1, CCG010133. 1, CCG010140. 1, CCG007060. 1, CCG02044

3014436. 2, CCG026613. 1, CCG018226. 1, CCG024532. 1, CCG025378. 1, CCG018942. 1, CCG027108. 1, CCG000402. 1, CCG012305. 1, CCG018929. 1, CCG011891. 1, CCG000820. 1, CCG025827. 1, CCG00890:

G019389. 1, CCG000754. 1, CCG014360. 1, CCG013065. 1, CCG007059. 1, CCG007690. 1, CCG014819. 1, CCG013865. 1, CCG026666. 1, CCG027114. 1, CCG000427. 1, CCG024611. 1, CCG006344. 1, CCG01398:  
G011122. 1, CCG012305. 1, CCG018929. 1, CCG011891. 1, CCG017425. 1, CCG000820. 1, CCG019712. 1, CCG023940. 1, CCG018238. 1, CCG016900. 1, CCG000409. 1, CCG001048. 1, CCG028320. 1, CCG01763:

G011122. 1, CCG012305. 1, CCG018929. 1, CCG011891. 1, CCG017425. 1, CCG000820. 1, CCG019712. 1, CCG023940. 1, CCG018238. 1, CCG016900. 1, CCG000409. 1, CCG001048. 1, CCG028320. 1, CCG017634

G009227. 1, CCG022364. 1, CCG019076. 1, CCG022450. 1, CCG028535. 1, CCG020794. 1, CCG014035. 1, CCG009109. 3, CCG002163. 1, CCG018713. 1, CCG016072. 1, CCG006118. 1, CCG017549. 1, CCG011199. 1

G017826. 1, CCG021934. 1, CCG019890. 1, CCG025323. 1, CCG004308. 1, CCG010710. 1, CCG006469. 1, CCG001649. 1, CCG023640. 1, CCG026796. 1, CCG026314. 1, CCG023980. 1, CCG027718. 1, CCG009808. 1, CCG023640. 1, CCG026314. 1, CCG023980. 1, CCG027718. 1, CCG025348. 1, CCG019191. 1, CCG026839. 1, CCG003662. 1, CCG019619. 1, CCG006588. 2, CCG011381. 1, CCG000991. 1, CCG016495. 1, CCG014156.

G0033992. 1, CCG009208. 1, CCG009668. 1, CCG001673. 1, CCG010710. 1, CCG017095. 1, CCG025596. 1, CCG005330. 1, CCG005191. 1, CCG017107. 1, CCG005975. 1, CCG016269. 1, CCG009207. 1, CCG02443. 1

G022947. 1, CCG008742. 1, CCG011228. 1, CCG022045. 1, CCG003427. 1, CCG012902. 1, CCG005635. 1, CCG025946. 1, CCG028568. 1, CCG026937. 1, CCG024689. 1, CCG013879. 1, CCG000593. 1, CCG00067(



3026240. 1, CCG013013. 1, CCG023153. 3, CCG014000. 1, CCG026363. 1, CCG027756. 1, CCG017477. 1, CCG025568. 1, CCG006004. 1, CCG022168. 1, CCG006803. 1, CCG019647. 1, CCG020769. 1, CCG003289. 1, CCG017062. 1, CCG011758. 1, CCG022929. 1, CCG004844. 1, CCG017217. 3, CCG024431. 1, CCG018930. 1, CCG024066. 1, CCG025036. 1, CCG018494. 1, CCG012009. 1, CCG021686. 1, CCG020659. 1, CCG015896. 1, CCG017062. 1, CCG011758. 1, CCG022929. 1, CCG004844. 1, CCG017217. 3, CCG024431. 1, CCG018930. 1, CCG024066. 1, CCG025036. 1, CCG018494. 1, CCG012009. 1, CCG021686. 1, CCG020659. 1, CCG015896. 1, CCG009141. 1, CCG022792. 1

3016111. 1, CCG008755. 1, CCG020326. 1, CCG015924. 1, CCG022168. 1, CCG010505. 1, CCG027921. 1, CCG021167. 1, CCG019520. 1, CCG008444. 1, CCG019185. 1, CCG012023. 1, CCG004238. 1, CCG010702. 1, CCG000812. 1, CCG000602. 1, CCG023576. 1, CCG013989. 1, CCG012954. 1, CCG004528. 1, CCG006932. 1, CCG005495. 1, CCG009419. 1, CCG019188. 1, CCG015897. 1, CCG001214. 1, CCG016111. 1, CCG026384. 1, CCG019520. 1, CCG008444. 1, CCG019185. 1, CCG004238. 1, CCG010702. 1, CCG011730. 1, CCG019721. 1, CCG017773. 1, CCG014928. 1, CCG015966. 1, CCG024664. 1, CCG021354. 1, CCG021737. 1, CCG000773. 1, CCG015925. 1, CCG025138. 1, CCG015289. 1, CCG026699. 1, CCG007880. 1, CCG000788. 1, CCG028245. 1, CCG026742. 1, CCG002852. 1, CCG002966. 1, CCG020089. 1, CCG009774. 1, CCG020562. 1, CCG023695. 1, CCG006931. 1, CCG001873. 1, CCG028517. 1, CCG013258. 1, CCG022104. 1, CCG027940. 1, CCG000812. 1, CCG000602. 1, CCG023576. 1, CCG013989. 1, CCG012954. 1, CCG004528. 1, CCG020562. 1, CCG023695. 1, CCG006931. 1, CCG001873. 1, CCG028517. 1, CCG013258. 1, CCG022104. 1, CCG027940. 1, CCG000812. 1, CCG000602. 1, CCG023576. 1, CCG013989. 1, CCG012954. 1, CCG004528. 1, CCG012028. 1, CCG005261. 1, CCG026700. 2, CCG019765. 1, CCG003421. 1, CCG009382. 1, CCG006666. 1, CCG024865. 1, CCG004293. 1, CCG013182. 1, CCG024659. 1, CCG018098. 1, CCG018968. 1, CCG011044. 1, CCG027993. 1, CCG001289. 1, CCG018206. 1, CCG008099. 1

3023196. 1, CCG008004. 1, CCG017570. 1, CCG018585. 3, CCG007467. 1, CCG008341. 1, CCG000320. 1, CCG014385. 1, CCG003203. 1, CCG012955. 1, CCG022226. 1, CCG013119. 1, CCG022994. 1, CCG005089. 1, CCG023196. 1, CCG008004. 1, CCG017570. 1, CCG018585. 3, CCG007467. 1, CCG008341. 1, CCG000320. 1, CCG014385. 1, CCG003203. 1, CCG012955. 1, CCG022226. 1, CCG013119. 1, CCG022994. 1, CCG005089. 1

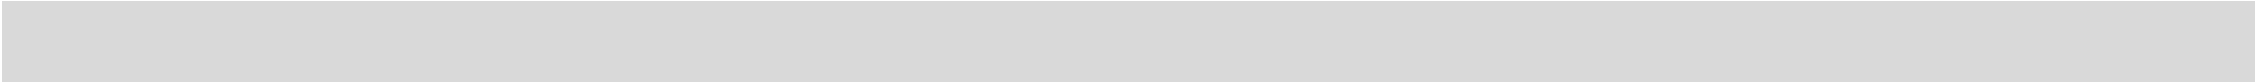



















































































































































































































































1, CCG027125. 1, CCG019742. 1, CCG019932. 1

0. 1, CCG020444. 1, CCG008939. 1, CCG009243. 1, CCG017725. 1, CCG018200. 1, CCG017585. 1, CCG020318. 1, CCG023963. 3, CCG006421. 1, CCG014434. 1, CCG007827. 1, CCG010139. 1, CCG0

4. 1, CCG009243. 1, CCG017725. 1, CCG018200. 1, CCG017585. 1, CCG020318. 1, CCG023963. 3, CCG006421. 1, CCG014434. 1, CCG007827. 1, CCG010139. 1, CCG025027. 1, CCG028524. 1, CCG0  
4. 1, CCG009243. 1, CCG017725. 1, CCG018200. 1, CCG017585. 1, CCG020318. 1, CCG023963. 3, CCG006421. 1, CCG014434. 1, CCG007827. 1, CCG010139. 1, CCG025027. 1, CCG028524. 1, CCG0

2. 1, CCG016900. 1, CCG001048. 1, CCG028320. 1, CCG017636. 2, CCG019844. 1, CCG025320. 1, CCG021695. 1, CCG017935. 1, CCG008895. 1, CCG002783. 1, CCG003725. 2, CCG007729. 1, CCG0

3. 1, CCG011899. 1, CCG019292. 1, CCG027672. 1, CCG026293. 1, CCG000103. 1, CCG022475. 1, CCG003684. 1, CCG021985. 1, CCG003938. 1, CCG024392. 1, CCG009119. 1, CCG023315. 1, CCG0  
3. 2, CCG019844. 1, CCG024878. 1, CCG003725. 2, CCG020908. 1, CCG007729. 1, CCG015755. 1, CCG003065. 1, CCG018945. 1, CCG028321. 1, CCG027211. 1, CCG019831. 2, CCG019139. 1, CCG0

3. 2, CCG019844. 1, CCG024878. 1, CCG003725. 2, CCG020908. 1, CCG007729. 1, CCG015755. 1, CCG003065. 1, CCG018945. 1, CCG028321. 1, CCG027211. 1, CCG019831. 2, CCG019139. 1, CCG0

1. 2, CCG003985. 1, CCG001921. 1, CCG014571. 1, CCG007995. 1, CCG016075. 1, CCG008004. 1, CCG023196. 1, CCG007467. 1, CCG022848. 1, CCG011989. 1, CCG021604. 1, CCG014385. 1, CCG0

3. 1, CCG025348. 1, CCG019191. 1, CCG026839. 1, CCG003662. 1, CCG019619. 1, CCG006588. 2, CCG011381. 1, CCG000991. 1, CCG016495. 1, CCG014156. 1, CCG026707. 1, CCG024383. 1, CCG0  
3. 1, CCG026707. 1, CCG024383. 1, CCG022789. 1, CCG016956. 1, CCG001066. 1, CCG015914. 1, CCG019678. 1, CCG007724. 1, CCG014000. 1, CCG027756. 1, CCG018319. 2, CCG024382. 1, CCG0

1. 1, CCG019191. 1, CCG011778. 1, CCG011830. 1, CCG012534. 1, CCG006588. 2, CCG000524. 1, CCG000106. 1, CCG022910. 1, CCG016267. 1, CCG024222. 1, CCG016495. 1, CCG021686. 1, CCG0

3. 1, CCG026239. 1, CCG000436. 1, CCG002199. 1, CCG012009. 1, CCG005480. 2, CCG017760. 1, CCG015786. 1, CCG006452. 1, CCG016859. 1, CCG004594. 1, CCG010163. 1, CCG001428. 1, CCG0

3. 1, CCG026239. 1, CCG000436. 1, CCG002199. 1, CCG012009. 1, CCG005480. 2, CCG017760. 1, CCG015786. 1, CCG006452. 1, CCG016859. 1, CCG004594. 1, CCG010163. 1, CCG001428. 1, CCG0

4. 1, CCG020400. 2, CCG023530. 2, CCG000927. 1, CCG011706. 1, CCG023671. 2  
3. 1, CCG025096. 1, CCG028320. 1, CCG017636. 2, CCG019844. 1, CCG012770. 1, CCG012727. 1, CCG003725. 2, CCG020908. 1, CCG007729. 1, CCG015755. 1, CCG003065. 1, CCG012771. 1, CCG0  
4. 1, CCG022130. 1, CCG024865. 1, CCG007874. 3, CCG001704. 1, CCG005524. 1, CCG001289. 1, CCG010014. 1, CCG006174. 1, CCG027015. 1, CCG001928. 1, CCG001397. 1, CCG004055. 1, CCG0

3. 1, CCG016900. 1, CCG001048. 1, CCG000409. 1, CCG028320. 1, CCG017636. 2, CCG019844. 1, CCG025320. 1, CCG005955. 1, CCG008895. 1, CCG002783. 1, CCG003725. 2, CCG007729. 1, CCG0

3. 1, CCG006588. 2, CCG024222. 1, CCG016495. 1, CCG014156. 1, CCG024383. 1, CCG001145. 1, CCG005769. 1, CCG021686. 1, CCG014158. 1, CCG015914. 1, CCG026240. 1, CCG023153. 3, CCG0  
3. 1, CCG025914. 2, CCG001285. 1, CCG016753. 1, CCG011829. 1, CCG005786. 1, CCG023060. 1, CCG011252. 1, CCG027692. 1, CCG007954. 1, CCG000210. 1, CCG017612. 1, CCG008422. 1, CCG0  
4. 2, CCG002039. 1, CCG024207. 1, CCG021054. 1, CCG010121. 1, CCG027658. 1, CCG022286. 1, CCG016749. 1, CCG012792. 1, CCG019520. 1, CCG002422. 1, CCG005396. 1, CCG019185. 1, CCG0  
3. 1, CCG025914. 2, CCG022488. 2, CCG001285. 1, CCG016753. 1, CCG011829. 1, CCG023060. 1, CCG008709. 1, CCG011252. 1, CCG007954. 1, CCG000210. 1, CCG017612. 1, CCG008422. 1, CCG0  
3. 1, CCG025309. 1, CCG024431. 1, CCG019191. 1, CCG003662. 1, CCG011830. 1, CCG019619. 1, CCG006588. 2, CCG024222. 1, CCG016495. 1, CCG014156. 1, CCG017913. 1, CCG024383. 1, CCG0

5. 1, CCG015694. 1, CCG007063. 1, CCG021949. 1, CCG013865. 1, CCG006484. 1, CCG015704. 1, CCG000738. 1, CCG010378. 2, CCG027114. 1, CCG013999. 1, CCG000427. 1, CCG023775. 1, CCG0

4. 1, CCG011256. 1, CCG001013. 1, CCG027748. 1, CCG020963. 1, CCG007047. 1  
3. 1, CCG027182. 1, CCG016864. 1, CCG013635. 1, CCG011730. 1, CCG020400. 2, CCG010416. 1, CCG023530. 2, CCG011706. 1  
3. 1, CCG027182. 1, CCG016864. 1, CCG013635. 1, CCG011730. 1, CCG020400. 2, CCG010416. 1, CCG023530. 2, CCG011706. 1  
3. 1, CCG027182. 1, CCG016864. 1, CCG013635. 1, CCG011730. 1, CCG020400. 2, CCG010416. 1, CCG023530. 2, CCG011706. 1

9. 1, CCG027182. 1, CCG016864. 1, CCG013635. 1, CCG011730. 1, CCG020400. 2, CCG010416. 1, CCG023530. 2, CCG011706. 1  
3. 1, CCG027668. 1, CCG021284. 1, CCG001579. 1, CCG000732. 1, CCG008755. 1, CCG020326. 1, CCG015924. 1, CCG022168. 1, CCG010505. 1, CCG027921. 1, CCG006412. 1, CCG019520. 1, CCG0  
3. 1, CCG027668. 1, CCG021284. 1, CCG001579. 1, CCG000732. 1, CCG008755. 1, CCG020326. 1, CCG015924. 1, CCG022168. 1, CCG010505. 1, CCG027921. 1, CCG006412. 1, CCG019520. 1, CCG0

2. 1, CCG011730. 1, CCG019721. 1, CCG019315. 1, CCG017773. 1, CCG014928. 1, CCG015966. 1, CCG024664. 1, CCG021354. 1  
4. 1, CCG017305. 1, CCG022225. 1, CCG028590. 1, CCG027990. 1, CCG020097. 1, CCG017570. 1, CCG008341. 1, CCG000320. 1, CCG003203. 1, CCG012955. 1, CCG019307. 1, CCG022226. 1, CCG0

5. 1, CCG006392. 1, CCG022296. 1, CCG023756. 1, CCG001013. 1, CCG011256. 1, CCG027748. 1, CCG010766. 1, CCG004977. 1, CCG012255. 1, CCG007047. 1, CCG005261. 1, CCG019765. 1, CCG0  
3. 1, CCG006932. 1, CCG005495. 1, CCG019188. 1, CCG009419. 1, CCG015897. 1, CCG001214. 1, CCG016111. 1, CCG026384. 1, CCG017305. 1, CCG022225. 1, CCG028590. 1, CCG027990. 1, CCG0  
3. 1, CCG006932. 1, CCG005495. 1, CCG019188. 1, CCG009419. 1, CCG015897. 1, CCG001214. 1, CCG016111. 1, CCG026384. 1, CCG017305. 1, CCG022225. 1, CCG028590. 1, CCG027990. 1, CCG0

9. 1, CCG015991. 1, CCG005501. 1, CCG006174. 1, CCG004919. 1, CCG020179. 1, CCG025915. 1, CCG021356. 1, CCG027989. 1, CCG015543. 1, CCG019831. 2, CCG003007. 1, CCG002834. 1, CCG0

9. 1, CCG012191. 1, CCG007823. 1, CCG019323. 1, CCG012023. 1, CCG024254. 1, CCG003608. 1, CCG012957. 1, CCG023502. 1, CCG010001. 1, CCG003421. 1, CCG000785. 1, CCG009382. 1, CCG0  
9. 1, CCG012191. 1, CCG007823. 1, CCG019323. 1, CCG012023. 1, CCG024254. 1, CCG003608. 1, CCG012957. 1, CCG023502. 1, CCG010001. 1, CCG003421. 1, CCG000785. 1, CCG009382. 1, CCG0
